# Supplementary material for: A mechano-osmotic feedback couples cell volume to the rate of cell deformation
Source: eLife journal article supplement (doi:10.7554/elife.72381), 2022-04-13
Supplement: supp [file 0.4.xlsx]

## Sheet: Sheet1
ID	lineage	Frame	Cell_Intensisty
p7_1_100.tif	1	1	1158.93
p7_1_100.tif	1	2	1160.24
p7_1_100.tif	1	3	1149.98
p7_1_100.tif	1	4	1149.41
p7_1_100.tif	1	5	1161.71
p7_1_100.tif	1	6	1155.34
p7_1_100.tif	1	7	1162.77
p7_1_100.tif	1	8	1164.66
p7_1_100.tif	1	9	1170.86
p7_1_100.tif	1	10	1169.9
p7_1_100.tif	1	11	1165.06
p7_1_100.tif	1	12	1159.84
p7_1_100.tif	1	13	1159.12
p7_1_100.tif	1	14	1158.72
p7_1_100.tif	1	15	1164.93
p7_1_100.tif	1	16	1168.72
p7_1_100.tif	1	17	901.02
p7_1_100.tif	1	18	479.367
p7_1_100.tif	1	19	644.886
p7_1_100.tif	1	20	1143.3
p7_1_100.tif	1	21	1191.6
p7_1_100.tif	1	22	1178.61
p7_1_100.tif	1	23	1163.77
p7_1_100.tif	1	24	1170.87
p7_1_100.tif	1	25	1176.11
p7_1_100.tif	1	26	1176.23
p7_1_100.tif	1	27	1172.12
p7_1_100.tif	1	28	1176.5
p7_1_100.tif	1	29	1170.92
p7_1_100.tif	1	30	1194.97
p7_1_100.tif	1	31	1176.72
p7_1_100.tif	1	32	1159.12
p7_1_100.tif	1	33	917.855
p7_1_100.tif	1	34	1521.21
p7_1_100.tif	1	35	1172.91
p7_1_100.tif	1	36	1178.21
p7_1_100.tif	1	37	1182.68
p7_1_100.tif	1	38	1181.18
p7_1_100.tif	1	39	1181.23
p7_1_100.tif	1	40	1183.91
p7_1_100.tif	1	41	1190.92
p7_1_100.tif	1	42	1188.2
p7_1_100.tif	1	43	1185.59
p7_1_100.tif	1	44	1181.31
p7_1_100.tif	1	45	1183.12
p7_1_100.tif	1	46	1186.76
p7_1_100.tif	1	47	1197.11
p7_1_100.tif	1	48	1184.34
p7_1_100.tif	1	49	1183.62
p7_1_100.tif	1	50	1243.3
p7_1_100.tif	1	51	1723.63
p7_1_100.tif	1	52	1178.44
p7_1_100.tif	1	53	224.874
p7_1_100.tif	1	54	832.712
p7_1_100.tif	1	55	1191.4
p7_1_100.tif	1	56	1189.05
p7_1_100.tif	1	57	1196.85
p7_1_100.tif	1	58	1192.19
p7_1_100.tif	1	59	1196.43
p7_1_100.tif	1	60	1190.25
p7_1_100.tif	1	61	1194
p7_1_100.tif	1	62	1191.26
p7_1_100.tif	1	63	1183.29
p7_1_100.tif	1	64	1175.89
p7_1_100.tif	1	65	1187.02
p7_1_100.tif	1	66	1186.52
p7_1_100.tif	1	67	1195.11
p7_1_100.tif	1	68	1185.65
p7_1_100.tif	1	69	1176.41
p7_1_100.tif	1	70	1167.8
p7_1_100.tif	1	71	1186.31
p7_1_100.tif	1	72	1155.92
p7_1_100.tif	1	73	1192.2
p7_1_100.tif	1	74	1172.14
p7_1_100.tif	1	75	1160.1
p7_1_100.tif	1	76	1661.66
p7_1_100.tif	1	77	1166.35
p7_1_100.tif	1	78	1174.88
p7_1_100.tif	1	79	1182.41
p7_1_100.tif	1	80	1190.81
p7_1_100.tif	1	81	1199.11
p7_1_100.tif	1	82	1193.67
p7_1_100.tif	1	83	1156.09
p7_1_100.tif	1	84	1180.72
p7_1_100.tif	1	85	1154.16
p7_1_100.tif	1	86	1126.03
p7_1_100.tif	1	87	1102.94
p7_1_100.tif	1	88	1077.82
p7_1_100.tif	1	89	1055.49
p7_1_100.tif	1	90	1041.34
p7_1_100.tif	1	91	1018.15
p7_1_100.tif	1	92	1001.05
p7_1_100.tif	1	93	983.262
p7_1_100.tif	1	94	959.011
p7_1_100.tif	1	95	938.671
p7_1_100.tif	1	96	899.226
p7_1_100.tif	1	97	888.386
p7_1_100.tif	1	98	897.917
p7_1_100.tif	1	99	893.299
p7_1_100.tif	1	100	874.287
p7_101_200.tif	1	101	869.24
p7_101_200.tif	1	102	853.399
p7_101_200.tif	1	103	833.416
p7_101_200.tif	1	104	823.385
p7_101_200.tif	1	105	823.657
p7_101_200.tif	1	106	814.795
p7_101_200.tif	1	107	801.106
p7_101_200.tif	1	108	809.632
p7_101_200.tif	1	109	803.313
p7_101_200.tif	1	110	794.235
p7_101_200.tif	1	111	790.756
p7_101_200.tif	1	112	789.153
p7_101_200.tif	1	113	793.469
p7_101_200.tif	1	114	784.279
p7_101_200.tif	1	115	783.647
p7_101_200.tif	1	116	782.547
p7_101_200.tif	1	117	781.525
p7_101_200.tif	1	118	778.744
p7_101_200.tif	1	119	782.262
p7_101_200.tif	1	120	765.235
p7_101_200.tif	1	121	778.308
p7_101_200.tif	1	122	773.406
p7_101_200.tif	1	123	774.54
p7_101_200.tif	1	124	767.245
p7_101_200.tif	1	125	775.735
p7_101_200.tif	1	126	770.753
p7_101_200.tif	1	127	775.007
p7_101_200.tif	1	128	768.082
p7_101_200.tif	1	129	763.358
p7_101_200.tif	1	130	2334.39
p7_101_200.tif	1	131	773.737
p7_101_200.tif	1	132	771.057
p7_101_200.tif	1	133	769.635
p7_101_200.tif	1	134	764.386
p7_101_200.tif	1	135	756.282
p7_101_200.tif	1	136	766.169
p7_101_200.tif	1	137	762.778
p7_101_200.tif	1	138	753.723
p7_101_200.tif	1	139	764.049
p7_101_200.tif	1	140	767.319
p7_101_200.tif	1	141	763.494
p7_101_200.tif	1	142	760.214
p7_101_200.tif	1	143	758.568
p7_101_200.tif	1	144	760.877
p7_101_200.tif	1	145	758.547
p7_101_200.tif	1	146	761.905
p7_101_200.tif	1	147	758.984
p7_101_200.tif	1	148	762.634
p7_101_200.tif	1	149	756.892
p7_101_200.tif	1	150	762.667
p7_101_200.tif	1	151	754.855
p7_101_200.tif	1	152	762.993
p7_101_200.tif	1	153	764.423
p7_101_200.tif	1	154	759.343
p7_101_200.tif	1	155	758.863
p7_101_200.tif	1	156	758.89
p7_101_200.tif	1	157	759.089
p7_101_200.tif	1	158	756.543
p7_101_200.tif	1	159	759.834
p7_101_200.tif	1	160	753.05
p7_101_200.tif	1	161	760.903
p7_101_200.tif	1	162	765.198
p7_101_200.tif	1	163	760.222
p7_101_200.tif	1	164	755.589
p7_101_200.tif	1	165	756.992
p7_101_200.tif	1	166	767.188
p7_101_200.tif	1	167	761.513
p7_101_200.tif	1	168	766.927
p7_101_200.tif	1	169	763.841
p7_101_200.tif	1	170	765.491
p7_101_200.tif	1	171	766.162
p7_101_200.tif	1	172	767.606
p7_101_200.tif	1	173	769.483
p7_101_200.tif	1	174	762.644
p7_101_200.tif	1	175	759.712
p7_101_200.tif	1	176	760.351
p7_101_200.tif	1	177	758.985
p7_101_200.tif	1	178	756.551
p7_101_200.tif	1	179	764.038
p7_101_200.tif	1	180	758.946
p7_101_200.tif	1	181	763.786
p7_101_200.tif	1	182	764.855
p7_101_200.tif	1	183	761.997
p7_101_200.tif	1	184	754.859
p7_101_200.tif	1	185	761.204
p7_101_200.tif	1	186	762.045
p7_101_200.tif	1	187	763.162
p7_101_200.tif	1	188	761.634
p7_101_200.tif	1	189	760.059
p7_101_200.tif	1	190	759.688
p7_101_200.tif	1	191	767.697
p7_101_200.tif	1	192	760.627
p7_101_200.tif	1	193	758.186
p7_101_200.tif	1	194	762.62
p7_101_200.tif	1	195	759.89
p7_101_200.tif	1	196	762.913
p7_101_200.tif	1	197	770.647
p7_101_200.tif	1	198	769.692
p7_101_200.tif	1	199	757.858
p7_101_200.tif	1	200	763.181
p7_201_300.tif	1	201	759.403
p7_201_300.tif	1	202	759.46
p7_201_300.tif	1	203	768.256
p7_201_300.tif	1	204	764.243
p7_201_300.tif	1	205	760.531
p7_201_300.tif	1	206	767.238
p7_201_300.tif	1	207	763.766
p7_201_300.tif	1	208	756.799
p7_201_300.tif	1	209	762.916
p7_201_300.tif	1	210	770.171
p7_201_300.tif	1	211	766.048
p7_201_300.tif	1	212	766.138
p7_201_300.tif	1	213	770.09
p7_201_300.tif	1	214	765.009
p7_201_300.tif	1	215	763.946
p7_201_300.tif	1	216	762.442
p7_201_300.tif	1	217	763.067
p7_201_300.tif	1	218	764.322
p7_201_300.tif	1	219	767.865
p7_201_300.tif	1	220	768.432
p7_201_300.tif	1	221	765.566
p7_201_300.tif	1	222	770.374
p7_201_300.tif	1	223	764.111
p7_201_300.tif	1	224	768.973
p7_201_300.tif	1	225	772.755
p7_201_300.tif	1	226	761.474
p7_201_300.tif	1	227	766.795
p7_201_300.tif	1	228	766.339
p7_201_300.tif	1	229	763.356
p7_201_300.tif	1	230	766.689
p7_201_300.tif	1	231	772.587
p7_201_300.tif	1	232	769.008
p7_201_300.tif	1	233	759.853
p7_201_300.tif	1	234	768.357
p7_201_300.tif	1	235	767.85
p7_201_300.tif	1	236	766.027
p7_201_300.tif	1	237	772.839
p7_201_300.tif	1	238	774.684
p7_201_300.tif	1	239	766.762
p7_201_300.tif	1	240	765.001
p7_201_300.tif	1	241	768.522
p7_201_300.tif	1	242	762.934
p7_201_300.tif	1	243	769.942
p7_201_300.tif	1	244	771.088
p7_201_300.tif	1	245	767.249
p7_201_300.tif	1	246	772.58
p7_201_300.tif	1	247	767.473
p7_201_300.tif	1	248	767.904
p7_201_300.tif	1	249	772.57
p7_201_300.tif	1	250	765.629
p7_201_300.tif	1	251	767.746
p7_201_300.tif	1	252	768.482
p7_201_300.tif	1	253	773.918
p7_201_300.tif	1	254	772.221
p7_201_300.tif	1	255	778.204
p7_201_300.tif	1	256	775.058
p7_201_300.tif	1	257	771.804
p7_201_300.tif	1	258	771.845
p7_201_300.tif	1	259	773.845
p7_201_300.tif	1	260	766.358
p7_201_300.tif	1	261	776.702
p7_201_300.tif	1	262	772.918
p7_201_300.tif	1	263	771.109
p7_201_300.tif	1	264	771.581
p7_201_300.tif	1	265	774.058
p7_201_300.tif	1	266	777.409
p7_201_300.tif	1	267	770.851
p7_201_300.tif	1	268	775.711
p7_201_300.tif	1	269	773.347
p7_201_300.tif	1	270	773.528
p7_201_300.tif	1	271	773.863
p7_201_300.tif	1	272	774.413
p7_201_300.tif	1	273	770.044
p7_201_300.tif	1	274	772.159
p7_201_300.tif	1	275	774.947
p7_201_300.tif	1	276	769.787
p7_201_300.tif	1	277	769.317
p7_201_300.tif	1	278	778.52
p7_201_300.tif	1	279	771.252
p7_201_300.tif	1	280	769.949
p7_201_300.tif	1	281	773.29
p7_201_300.tif	1	282	771.608
p7_201_300.tif	1	283	770.551
p7_201_300.tif	1	284	779.033
p7_201_300.tif	1	285	775.171
p7_201_300.tif	1	286	774.496
p7_201_300.tif	1	287	774.423
p7_201_300.tif	1	288	772.064
p7_201_300.tif	1	289	771.001
p7_201_300.tif	1	290	778.466
p7_201_300.tif	1	291	780.807
p7_201_300.tif	1	292	780.589
p7_201_300.tif	1	293	774.786
p7_201_300.tif	1	294	780.285
p7_201_300.tif	1	295	777.514
p7_201_300.tif	1	296	779.606
p7_201_300.tif	1	297	777.45
p7_201_300.tif	1	298	776.453
p7_201_300.tif	1	299	775.456
p7_201_300.tif	1	300	773.661
p7_1_100.tif	2	1	1429.28
p7_1_100.tif	2	2	1431.71
p7_1_100.tif	2	3	1425.09
p7_1_100.tif	2	4	1423.14
p7_1_100.tif	2	5	1423.08
p7_1_100.tif	2	6	1424.21
p7_1_100.tif	2	7	1427.05
p7_1_100.tif	2	8	1420.32
p7_1_100.tif	2	9	1424.74
p7_1_100.tif	2	10	1431.06
p7_1_100.tif	2	11	1428.76
p7_1_100.tif	2	12	1426.53
p7_1_100.tif	2	13	1429.53
p7_1_100.tif	2	14	1430.86
p7_1_100.tif	2	15	1426.77
p7_1_100.tif	2	16	1428.98
p7_1_100.tif	2	17	1103.7
p7_1_100.tif	2	18	600.344
p7_1_100.tif	2	19	805.868
p7_1_100.tif	2	20	1397.4
p7_1_100.tif	2	21	1461.19
p7_1_100.tif	2	22	1435.67
p7_1_100.tif	2	23	1431.27
p7_1_100.tif	2	24	1435.32
p7_1_100.tif	2	25	1434.6
p7_1_100.tif	2	26	1439.97
p7_1_100.tif	2	27	1441.62
p7_1_100.tif	2	28	1442.22
p7_1_100.tif	2	29	1439.37
p7_1_100.tif	2	30	1436.56
p7_1_100.tif	2	31	1446.38
p7_1_100.tif	2	32	1433.16
p7_1_100.tif	2	33	1139.59
p7_1_100.tif	2	34	1396.5
p7_1_100.tif	2	35	1434.83
p7_1_100.tif	2	36	1436.85
p7_1_100.tif	2	37	1452.67
p7_1_100.tif	2	38	1456.19
p7_1_100.tif	2	39	1441.24
p7_1_100.tif	2	40	1463.18
p7_1_100.tif	2	41	1459.15
p7_1_100.tif	2	42	1463.52
p7_1_100.tif	2	43	1453.58
p7_1_100.tif	2	44	1458.74
p7_1_100.tif	2	45	1452.28
p7_1_100.tif	2	46	1458.3
p7_1_100.tif	2	47	1443.95
p7_1_100.tif	2	48	1450.13
p7_1_100.tif	2	49	1452.83
p7_1_100.tif	2	50	1447.3
p7_1_100.tif	2	51	1454.54
p7_1_100.tif	2	52	1437.3
p7_1_100.tif	2	53	312.064
p7_1_100.tif	2	54	1004.75
p7_1_100.tif	2	55	1446.01
p7_1_100.tif	2	56	1458.24
p7_1_100.tif	2	57	1437.18
p7_1_100.tif	2	58	1452.87
p7_1_100.tif	2	59	1666.94
p7_1_100.tif	2	60	1491.34
p7_1_100.tif	2	61	1476.74
p7_1_100.tif	2	62	1470.01
p7_1_100.tif	2	63	1427.52
p7_1_100.tif	2	64	1462.2
p7_1_100.tif	2	65	1438.63
p7_1_100.tif	2	66	1446.16
p7_1_100.tif	2	67	1342.44
p7_1_100.tif	2	68	1447.3
p7_1_100.tif	2	69	1448.74
p7_1_100.tif	2	70	1433.46
p7_1_100.tif	2	71	1420.63
p7_1_100.tif	2	72	1453.58
p7_1_100.tif	2	73	1435.77
p7_1_100.tif	2	74	1427.94
p7_1_100.tif	2	75	1431.38
p7_1_100.tif	2	76	1422.72
p7_1_100.tif	2	77	1429.12
p7_1_100.tif	2	78	1433.14
p7_1_100.tif	2	79	1434.15
p7_1_100.tif	2	80	1435.66
p7_1_100.tif	2	81	1442.53
p7_1_100.tif	2	82	1447.24
p7_1_100.tif	2	83	1442.56
p7_1_100.tif	2	84	1431.53
p7_1_100.tif	2	85	1411.95
p7_1_100.tif	2	86	1391.3
p7_1_100.tif	2	87	1371.79
p7_1_100.tif	2	88	1341.98
p7_1_100.tif	2	89	1322.17
p7_1_100.tif	2	90	1294.01
p7_1_100.tif	2	91	1275.86
p7_1_100.tif	2	92	1255.78
p7_1_100.tif	2	93	1231.23
p7_1_100.tif	2	94	1218.82
p7_1_100.tif	2	95	1198.82
p7_1_100.tif	2	96	1187.62
p7_1_100.tif	2	97	1168.99
p7_1_100.tif	2	98	1150.5
p7_1_100.tif	2	99	1138.93
p7_1_100.tif	2	100	1123.76
p7_101_200.tif	2	101	1110.41
p7_101_200.tif	2	102	1103.45
p7_101_200.tif	2	103	1065.95
p7_101_200.tif	2	104	1053.75
p7_101_200.tif	2	105	1048.82
p7_101_200.tif	2	106	1032.23
p7_101_200.tif	2	107	1035.02
p7_101_200.tif	2	108	1030.32
p7_101_200.tif	2	109	1019.66
p7_101_200.tif	2	110	1009.53
p7_101_200.tif	2	111	1010.79
p7_101_200.tif	2	112	998.481
p7_101_200.tif	2	113	992.871
p7_101_200.tif	2	114	1002.14
p7_101_200.tif	2	115	992.142
p7_101_200.tif	2	116	994.798
p7_101_200.tif	2	117	988.402
p7_101_200.tif	2	118	977.724
p7_101_200.tif	2	119	981.773
p7_101_200.tif	2	120	981.802
p7_101_200.tif	2	121	978.225
p7_101_200.tif	2	122	975.684
p7_101_200.tif	2	123	973.007
p7_101_200.tif	2	124	971.441
p7_101_200.tif	2	125	974.059
p7_101_200.tif	2	126	972.742
p7_101_200.tif	2	127	969.223
p7_101_200.tif	2	128	972.671
p7_101_200.tif	2	129	969.324
p7_101_200.tif	2	130	971.387
p7_101_200.tif	2	131	963.529
p7_101_200.tif	2	132	967.178
p7_101_200.tif	2	133	965.185
p7_101_200.tif	2	134	963.124
p7_101_200.tif	2	135	958.319
p7_101_200.tif	2	136	952.656
p7_101_200.tif	2	137	967.709
p7_101_200.tif	2	138	964.838
p7_101_200.tif	2	139	964.641
p7_101_200.tif	2	140	955.269
p7_101_200.tif	2	141	961.858
p7_101_200.tif	2	142	975.796
p7_101_200.tif	2	143	960.3
p7_101_200.tif	2	144	961.54
p7_101_200.tif	2	145	960.14
p7_101_200.tif	2	146	962.955
p7_101_200.tif	2	147	964.714
p7_101_200.tif	2	148	965.001
p7_101_200.tif	2	149	960.727
p7_101_200.tif	2	150	966.011
p7_101_200.tif	2	151	961.563
p7_101_200.tif	2	152	967.978
p7_101_200.tif	2	153	961.295
p7_101_200.tif	2	154	967.237
p7_101_200.tif	2	155	960.441
p7_101_200.tif	2	156	964.993
p7_101_200.tif	2	157	956.866
p7_101_200.tif	2	158	964.917
p7_101_200.tif	2	159	960.426
p7_101_200.tif	2	160	961.428
p7_101_200.tif	2	161	960.156
p7_101_200.tif	2	162	961.221
p7_101_200.tif	2	163	962.801
p7_101_200.tif	2	164	960.991
p7_101_200.tif	2	165	957.99
p7_101_200.tif	2	166	961.234
p7_101_200.tif	2	167	962.154
p7_101_200.tif	2	168	961.728
p7_101_200.tif	2	169	961.124
p7_101_200.tif	2	170	962.238
p7_101_200.tif	2	171	963.531
p7_101_200.tif	2	172	957.649
p7_101_200.tif	2	173	966.273
p7_101_200.tif	2	174	962.84
p7_101_200.tif	2	175	956.15
p7_101_200.tif	2	176	952.244
p7_101_200.tif	2	177	969.249
p7_101_200.tif	2	178	967.209
p7_101_200.tif	2	179	965.654
p7_101_200.tif	2	180	962.841
p7_101_200.tif	2	181	961.928
p7_101_200.tif	2	182	955.954
p7_101_200.tif	2	183	957.704
p7_101_200.tif	2	184	957.383
p7_101_200.tif	2	185	963.748
p7_101_200.tif	2	186	961.666
p7_101_200.tif	2	187	968.448
p7_101_200.tif	2	188	969.127
p7_101_200.tif	2	189	966.419
p7_101_200.tif	2	190	962.841
p7_101_200.tif	2	191	962.302
p7_101_200.tif	2	192	956.58
p7_101_200.tif	2	193	959.576
p7_101_200.tif	2	194	966.201
p7_101_200.tif	2	195	962.123
p7_101_200.tif	2	196	967.435
p7_101_200.tif	2	197	965.95
p7_101_200.tif	2	198	957.587
p7_101_200.tif	2	199	965.73
p7_101_200.tif	2	200	962.445
p7_201_300.tif	2	201	961.624
p7_201_300.tif	2	202	965.505
p7_201_300.tif	2	203	962.912
p7_201_300.tif	2	204	959.146
p7_201_300.tif	2	205	963.969
p7_201_300.tif	2	206	959.469
p7_201_300.tif	2	207	968.687
p7_201_300.tif	2	208	958.606
p7_201_300.tif	2	209	963.265
p7_201_300.tif	2	210	963.719
p7_201_300.tif	2	211	954.723
p7_201_300.tif	2	212	964.097
p7_201_300.tif	2	213	963.335
p7_201_300.tif	2	214	970.102
p7_201_300.tif	2	215	963.388
p7_201_300.tif	2	216	959.102
p7_201_300.tif	2	217	966.587
p7_201_300.tif	2	218	959.648
p7_201_300.tif	2	219	963.971
p7_201_300.tif	2	220	959.553
p7_201_300.tif	2	221	963.762
p7_201_300.tif	2	222	967.84
p7_201_300.tif	2	223	957.753
p7_201_300.tif	2	224	964.465
p7_201_300.tif	2	225	961.564
p7_201_300.tif	2	226	961.961
p7_201_300.tif	2	227	970.585
p7_201_300.tif	2	228	961.245
p7_201_300.tif	2	229	966.115
p7_201_300.tif	2	230	968.189
p7_201_300.tif	2	231	967.196
p7_201_300.tif	2	232	964.204
p7_201_300.tif	2	233	965.217
p7_201_300.tif	2	234	968.8
p7_201_300.tif	2	235	966.77
p7_201_300.tif	2	236	966.657
p7_201_300.tif	2	237	960.407
p7_201_300.tif	2	238	958.395
p7_201_300.tif	2	239	964.984
p7_201_300.tif	2	240	964.472
p7_201_300.tif	2	241	970.267
p7_201_300.tif	2	242	960.324
p7_201_300.tif	2	243	965.415
p7_201_300.tif	2	244	967.494
p7_201_300.tif	2	245	969.055
p7_201_300.tif	2	246	961.312
p7_201_300.tif	2	247	968.713
p7_201_300.tif	2	248	966.248
p7_201_300.tif	2	249	971.338
p7_201_300.tif	2	250	969.258
p7_201_300.tif	2	251	966.03
p7_201_300.tif	2	252	967.481
p7_201_300.tif	2	253	967.893
p7_201_300.tif	2	254	971.054
p7_201_300.tif	2	255	972.62
p7_201_300.tif	2	256	975.299
p7_201_300.tif	2	257	970.002
p7_201_300.tif	2	258	970.335
p7_201_300.tif	2	259	975.104
p7_201_300.tif	2	260	966.7
p7_201_300.tif	2	261	972.203
p7_201_300.tif	2	262	968.088
p7_201_300.tif	2	263	969.03
p7_201_300.tif	2	264	968.098
p7_201_300.tif	2	265	973.308
p7_201_300.tif	2	266	968.937
p7_201_300.tif	2	267	974.733
p7_201_300.tif	2	268	976.166
p7_201_300.tif	2	269	972.351
p7_201_300.tif	2	270	973.655
p7_201_300.tif	2	271	968.888
p7_201_300.tif	2	272	972.017
p7_201_300.tif	2	273	977.459
p7_201_300.tif	2	274	967.91
p7_201_300.tif	2	275	974.101
p7_201_300.tif	2	276	971.673
p7_201_300.tif	2	277	974.976
p7_201_300.tif	2	278	972.624
p7_201_300.tif	2	279	976.847
p7_201_300.tif	2	280	977.906
p7_201_300.tif	2	281	978.032
p7_201_300.tif	2	282	969.033
p7_201_300.tif	2	283	969.921
p7_201_300.tif	2	284	969.261
p7_201_300.tif	2	285	969.452
p7_201_300.tif	2	286	980.206
p7_201_300.tif	2	287	977.188
p7_201_300.tif	2	288	972.625
p7_201_300.tif	2	289	974.245
p7_201_300.tif	2	290	969.245
p7_201_300.tif	2	291	969.947
p7_201_300.tif	2	292	969.693
p7_201_300.tif	2	293	975.898
p7_201_300.tif	2	294	972.636
p7_201_300.tif	2	295	969.936
p7_201_300.tif	2	296	968.984
p7_201_300.tif	2	297	975.944
p7_201_300.tif	2	298	974.054
p7_201_300.tif	2	299	977.165
p7_201_300.tif	2	300	972.144
p7_1_100.tif	3	1	1489.51
p7_1_100.tif	3	2	1493.41
p7_1_100.tif	3	3	1491.21
p7_1_100.tif	3	4	1491.09
p7_1_100.tif	3	5	1492.13
p7_1_100.tif	3	6	1488.8
p7_1_100.tif	3	7	1488.38
p7_1_100.tif	3	8	1488.81
p7_1_100.tif	3	9	1492.58
p7_1_100.tif	3	10	1496.09
p7_1_100.tif	3	11	1491.82
p7_1_100.tif	3	12	1489.73
p7_1_100.tif	3	13	1489.95
p7_1_100.tif	3	14	1490.96
p7_1_100.tif	3	15	1495.88
p7_1_100.tif	3	16	1498.15
p7_1_100.tif	3	17	1149.65
p7_1_100.tif	3	18	632.414
p7_1_100.tif	3	19	869.196
p7_1_100.tif	3	20	1463.81
p7_1_100.tif	3	21	1522.68
p7_1_100.tif	3	22	1497.35
p7_1_100.tif	3	23	1496.06
p7_1_100.tif	3	24	1495.34
p7_1_100.tif	3	25	1502.96
p7_1_100.tif	3	26	1502.11
p7_1_100.tif	3	27	1500.13
p7_1_100.tif	3	28	1498.48
p7_1_100.tif	3	29	1502.93
p7_1_100.tif	3	30	1514.37
p7_1_100.tif	3	31	1502.01
p7_1_100.tif	3	32	1495.42
p7_1_100.tif	3	33	1205.33
p7_1_100.tif	3	34	1487.59
p7_1_100.tif	3	35	1502.59
p7_1_100.tif	3	36	1502.58
p7_1_100.tif	3	37	1508.17
p7_1_100.tif	3	38	1516.08
p7_1_100.tif	3	39	1503.72
p7_1_100.tif	3	40	1529.19
p7_1_100.tif	3	41	1520.22
p7_1_100.tif	3	42	1525.72
p7_1_100.tif	3	43	1519.83
p7_1_100.tif	3	44	1522.22
p7_1_100.tif	3	45	1516.84
p7_1_100.tif	3	46	1514.2
p7_1_100.tif	3	47	1510.85
p7_1_100.tif	3	48	1512.34
p7_1_100.tif	3	49	1516.53
p7_1_100.tif	3	50	1514.97
p7_1_100.tif	3	51	1519.55
p7_1_100.tif	3	52	1516.85
p7_1_100.tif	3	53	358.881
p7_1_100.tif	3	54	1059.77
p7_1_100.tif	3	55	1515.28
p7_1_100.tif	3	56	1526.87
p7_1_100.tif	3	57	1524.59
p7_1_100.tif	3	58	1518.77
p7_1_100.tif	3	59	1513.42
p7_1_100.tif	3	60	1517.35
p7_1_100.tif	3	61	1532.44
p7_1_100.tif	3	62	1537.19
p7_1_100.tif	3	63	1524.62
p7_1_100.tif	3	64	1517.59
p7_1_100.tif	3	65	1510.16
p7_1_100.tif	3	66	1519.24
p7_1_100.tif	3	67	2837.48
p7_1_100.tif	3	68	1481.6
p7_1_100.tif	3	69	1461.38
p7_1_100.tif	3	70	1486.84
p7_1_100.tif	3	71	1495
p7_1_100.tif	3	72	1513.34
p7_1_100.tif	3	73	1498.87
p7_1_100.tif	3	74	1493.42
p7_1_100.tif	3	75	1492.01
p7_1_100.tif	3	76	1487.79
p7_1_100.tif	3	77	1488.4
p7_1_100.tif	3	78	1484.07
p7_1_100.tif	3	79	1481.74
p7_1_100.tif	3	80	1477.37
p7_1_100.tif	3	81	1468.29
p7_1_100.tif	3	82	1457.58
p7_1_100.tif	3	83	1429.74
p7_1_100.tif	3	84	1417.71
p7_1_100.tif	3	85	1397.45
p7_1_100.tif	3	86	1386.46
p7_1_100.tif	3	87	1369.16
p7_1_100.tif	3	88	1355.77
p7_1_100.tif	3	89	1345.71
p7_1_100.tif	3	90	1331.13
p7_1_100.tif	3	91	1306.7
p7_1_100.tif	3	92	1280.01
p7_1_100.tif	3	93	1245.28
p7_1_100.tif	3	94	1229.25
p7_1_100.tif	3	95	1208.59
p7_1_100.tif	3	96	1177.16
p7_1_100.tif	3	97	1160.4
p7_1_100.tif	3	98	1136.46
p7_1_100.tif	3	99	1127.66
p7_1_100.tif	3	100	1115.03
p7_101_200.tif	3	101	1094.46
p7_101_200.tif	3	102	1079.17
p7_101_200.tif	3	103	1055.14
p7_101_200.tif	3	104	1048.72
p7_101_200.tif	3	105	1044.16
p7_101_200.tif	3	106	1032.47
p7_101_200.tif	3	107	1027.1
p7_101_200.tif	3	108	1021.18
p7_101_200.tif	3	109	1022.42
p7_101_200.tif	3	110	1022.64
p7_101_200.tif	3	111	1008.73
p7_101_200.tif	3	112	1010.39
p7_101_200.tif	3	113	1003.76
p7_101_200.tif	3	114	1006.21
p7_101_200.tif	3	115	1001.2
p7_101_200.tif	3	116	996.796
p7_101_200.tif	3	117	999.251
p7_101_200.tif	3	118	994.79
p7_101_200.tif	3	119	994.616
p7_101_200.tif	3	120	989.692
p7_101_200.tif	3	121	992.559
p7_101_200.tif	3	122	985.02
p7_101_200.tif	3	123	987.932
p7_101_200.tif	3	124	991.499
p7_101_200.tif	3	125	985.021
p7_101_200.tif	3	126	983.127
p7_101_200.tif	3	127	984.472
p7_101_200.tif	3	128	986.454
p7_101_200.tif	3	129	987.733
p7_101_200.tif	3	130	987.585
p7_101_200.tif	3	131	985.207
p7_101_200.tif	3	132	988.685
p7_101_200.tif	3	133	987.95
p7_101_200.tif	3	134	984.263
p7_101_200.tif	3	135	981.311
p7_101_200.tif	3	136	982.024
p7_101_200.tif	3	137	985.223
p7_101_200.tif	3	138	983.172
p7_101_200.tif	3	139	981.972
p7_101_200.tif	3	140	982.883
p7_101_200.tif	3	141	987.604
p7_101_200.tif	3	142	987.298
p7_101_200.tif	3	143	1008.57
p7_101_200.tif	3	144	986.097
p7_101_200.tif	3	145	991.759
p7_101_200.tif	3	146	987.691
p7_101_200.tif	3	147	987.908
p7_101_200.tif	3	148	982.425
p7_101_200.tif	3	149	982.91
p7_101_200.tif	3	150	981.701
p7_101_200.tif	3	151	952.222
p7_101_200.tif	3	152	991.773
p7_101_200.tif	3	153	982.165
p7_101_200.tif	3	154	983.969
p7_101_200.tif	3	155	992.293
p7_101_200.tif	3	156	983.117
p7_101_200.tif	3	157	987.215
p7_101_200.tif	3	158	986.99
p7_101_200.tif	3	159	993.858
p7_101_200.tif	3	160	986.101
p7_101_200.tif	3	161	990.252
p7_101_200.tif	3	162	991.652
p7_101_200.tif	3	163	989.419
p7_101_200.tif	3	164	994.425
p7_101_200.tif	3	165	997.57
p7_101_200.tif	3	166	992.198
p7_101_200.tif	3	167	994.933
p7_101_200.tif	3	168	986.128
p7_101_200.tif	3	169	991.092
p7_101_200.tif	3	170	986.73
p7_101_200.tif	3	171	991.694
p7_101_200.tif	3	172	987.533
p7_101_200.tif	3	173	991.973
p7_101_200.tif	3	174	992.018
p7_101_200.tif	3	175	986.38
p7_101_200.tif	3	176	994.272
p7_101_200.tif	3	177	1004.88
p7_101_200.tif	3	178	990.665
p7_101_200.tif	3	179	993.437
p7_101_200.tif	3	180	991.636
p7_101_200.tif	3	181	988.762
p7_101_200.tif	3	182	991.986
p7_101_200.tif	3	183	993.444
p7_101_200.tif	3	184	988.48
p7_101_200.tif	3	185	989.957
p7_101_200.tif	3	186	994.505
p7_101_200.tif	3	187	990.662
p7_101_200.tif	3	188	992.198
p7_101_200.tif	3	189	990.921
p7_101_200.tif	3	190	997.701
p7_101_200.tif	3	191	986.467
p7_101_200.tif	3	192	992.513
p7_101_200.tif	3	193	994.135
p7_101_200.tif	3	194	998.248
p7_101_200.tif	3	195	997.774
p7_101_200.tif	3	196	1000.9
p7_101_200.tif	3	197	1001.49
p7_101_200.tif	3	198	998.98
p7_101_200.tif	3	199	997.831
p7_101_200.tif	3	200	1002.85
p7_201_300.tif	3	201	995.603
p7_201_300.tif	3	202	997.991
p7_201_300.tif	3	203	994.46
p7_201_300.tif	3	204	994.658
p7_201_300.tif	3	205	992.988
p7_201_300.tif	3	206	1000.26
p7_201_300.tif	3	207	995.905
p7_201_300.tif	3	208	994.753
p7_201_300.tif	3	209	997.6
p7_201_300.tif	3	210	996.328
p7_201_300.tif	3	211	995.953
p7_201_300.tif	3	212	1005.43
p7_201_300.tif	3	213	1001.65
p7_201_300.tif	3	214	1000.16
p7_201_300.tif	3	215	996.816
p7_201_300.tif	3	216	998.249
p7_201_300.tif	3	217	1001.87
p7_201_300.tif	3	218	1000.13
p7_201_300.tif	3	219	1000.07
p7_201_300.tif	3	220	1002.69
p7_201_300.tif	3	221	1001.65
p7_201_300.tif	3	222	997.921
p7_201_300.tif	3	223	1003.05
p7_201_300.tif	3	224	1006.13
p7_201_300.tif	3	225	1000.67
p7_201_300.tif	3	226	992.447
p7_201_300.tif	3	227	1007.53
p7_201_300.tif	3	228	1002.48
p7_201_300.tif	3	229	1001.64
p7_201_300.tif	3	230	1004.36
p7_201_300.tif	3	231	1000.16
p7_201_300.tif	3	232	998.808
p7_201_300.tif	3	233	1004.39
p7_201_300.tif	3	234	1002.41
p7_201_300.tif	3	235	998.905
p7_201_300.tif	3	236	1003.05
p7_201_300.tif	3	237	1003.12
p7_201_300.tif	3	238	1003.69
p7_201_300.tif	3	239	999.266
p7_201_300.tif	3	240	1007.84
p7_201_300.tif	3	241	1007.74
p7_201_300.tif	3	242	1006.31
p7_201_300.tif	3	243	1006.02
p7_201_300.tif	3	244	1003.5
p7_201_300.tif	3	245	1002.05
p7_201_300.tif	3	246	1007.13
p7_201_300.tif	3	247	1009.44
p7_201_300.tif	3	248	1007.81
p7_201_300.tif	3	249	1008.08
p7_201_300.tif	3	250	1007.74
p7_201_300.tif	3	251	1003.13
p7_201_300.tif	3	252	1006.42
p7_201_300.tif	3	253	1013.48
p7_201_300.tif	3	254	1011.06
p7_201_300.tif	3	255	1008.88
p7_201_300.tif	3	256	1010.81
p7_201_300.tif	3	257	1012.91
p7_201_300.tif	3	258	1010.36
p7_201_300.tif	3	259	1004.82
p7_201_300.tif	3	260	1017.21
p7_201_300.tif	3	261	1008.71
p7_201_300.tif	3	262	1009.19
p7_201_300.tif	3	263	1016.55
p7_201_300.tif	3	264	1010.19
p7_201_300.tif	3	265	1008.75
p7_201_300.tif	3	266	1014.68
p7_201_300.tif	3	267	1010.35
p7_201_300.tif	3	268	1014.4
p7_201_300.tif	3	269	1017.06
p7_201_300.tif	3	270	1008.89
p7_201_300.tif	3	271	1011.92
p7_201_300.tif	3	272	1015.47
p7_201_300.tif	3	273	1021.29
p7_201_300.tif	3	274	1014.81
p7_201_300.tif	3	275	1017.33
p7_201_300.tif	3	276	1018.31
p7_201_300.tif	3	277	1012.43
p7_201_300.tif	3	278	1015.14
p7_201_300.tif	3	279	1015.82
p7_201_300.tif	3	280	1017.89
p7_201_300.tif	3	281	1015.08
p7_201_300.tif	3	282	1015.66
p7_201_300.tif	3	283	1015.68
p7_201_300.tif	3	284	1021.82
p7_201_300.tif	3	285	1016.77
p7_201_300.tif	3	286	1017.98
p7_201_300.tif	3	287	1014.19
p7_201_300.tif	3	288	1017.86
p7_201_300.tif	3	289	1017.23
p7_201_300.tif	3	290	1022.48
p7_201_300.tif	3	291	1021.6
p7_201_300.tif	3	292	1025.12
p7_201_300.tif	3	293	1020.47
p7_201_300.tif	3	294	1013.37
p7_201_300.tif	3	295	1018.35
p7_201_300.tif	3	296	1021.94
p7_201_300.tif	3	297	1020.07
p7_201_300.tif	3	298	1022.48
p7_201_300.tif	3	299	1021.63
p7_201_300.tif	3	300	1019.91
p7_1_100.tif	4	1	2204.79
p7_1_100.tif	4	2	2201.24
p7_1_100.tif	4	3	2197.72
p7_1_100.tif	4	4	2200.58
p7_1_100.tif	4	5	2206.27
p7_1_100.tif	4	6	2199.15
p7_1_100.tif	4	7	2213.23
p7_1_100.tif	4	8	2206.26
p7_1_100.tif	4	9	2208.09
p7_1_100.tif	4	10	2216.04
p7_1_100.tif	4	11	2203.43
p7_1_100.tif	4	12	2213.93
p7_1_100.tif	4	13	2207.12
p7_1_100.tif	4	14	2215.31
p7_1_100.tif	4	15	2221.17
p7_1_100.tif	4	16	2218.43
p7_1_100.tif	4	17	1734.68
p7_1_100.tif	4	18	1039.79
p7_1_100.tif	4	19	1382.45
p7_1_100.tif	4	20	2185.1
p7_1_100.tif	4	21	2248.21
p7_1_100.tif	4	22	2218.67
p7_1_100.tif	4	23	2210.57
p7_1_100.tif	4	24	2225.68
p7_1_100.tif	4	25	2232.68
p7_1_100.tif	4	26	2225.94
p7_1_100.tif	4	27	2218.21
p7_1_100.tif	4	28	2222.4
p7_1_100.tif	4	29	2225.47
p7_1_100.tif	4	30	2253.66
p7_1_100.tif	4	31	2234.33
p7_1_100.tif	4	32	2220.42
p7_1_100.tif	4	33	2082.41
p7_1_100.tif	4	34	2226.31
p7_1_100.tif	4	35	2219.46
p7_1_100.tif	4	36	2221.63
p7_1_100.tif	4	37	2241.38
p7_1_100.tif	4	38	2238.55
p7_1_100.tif	4	39	2233.18
p7_1_100.tif	4	40	2241.9
p7_1_100.tif	4	41	2247.51
p7_1_100.tif	4	42	2234.05
p7_1_100.tif	4	43	2234.7
p7_1_100.tif	4	44	2233.21
p7_1_100.tif	4	45	2244.13
p7_1_100.tif	4	46	2238.07
p7_1_100.tif	4	47	2241.9
p7_1_100.tif	4	48	2246.77
p7_1_100.tif	4	49	2239.44
p7_1_100.tif	4	50	2233.16
p7_1_100.tif	4	51	2239.52
p7_1_100.tif	4	52	2241.67
p7_1_100.tif	4	53	694.633
p7_1_100.tif	4	54	1838.15
p7_1_100.tif	4	55	2241.52
p7_1_100.tif	4	56	2251.4
p7_1_100.tif	4	57	2250.51
p7_1_100.tif	4	58	2245.68
p7_1_100.tif	4	59	2237.99
p7_1_100.tif	4	60	2238.2
p7_1_100.tif	4	61	2247.18
p7_1_100.tif	4	62	2247.09
p7_1_100.tif	4	63	2234.39
p7_1_100.tif	4	64	2233.28
p7_1_100.tif	4	65	2237.55
p7_1_100.tif	4	66	2229.47
p7_1_100.tif	4	67	2232.22
p7_1_100.tif	4	68	2156.11
p7_1_100.tif	4	69	2350.49
p7_1_100.tif	4	70	2222.05
p7_1_100.tif	4	71	2248.41
p7_1_100.tif	4	72	2252.57
p7_1_100.tif	4	73	2253.22
p7_1_100.tif	4	74	2237.45
p7_1_100.tif	4	75	2236.3
p7_1_100.tif	4	76	2237.25
p7_1_100.tif	4	77	2233.48
p7_1_100.tif	4	78	2232.1
p7_1_100.tif	4	79	2241.51
p7_1_100.tif	4	80	2241.21
p7_1_100.tif	4	81	2250.33
p7_1_100.tif	4	82	2247.09
p7_1_100.tif	4	83	2243.17
p7_1_100.tif	4	84	2243
p7_1_100.tif	4	85	2234.65
p7_1_100.tif	4	86	2226.39
p7_1_100.tif	4	87	2209.33
p7_1_100.tif	4	88	2203.96
p7_1_100.tif	4	89	2182.79
p7_1_100.tif	4	90	2165.2
p7_1_100.tif	4	91	2140.08
p7_1_100.tif	4	92	2119.22
p7_1_100.tif	4	93	2098.92
p7_1_100.tif	4	94	2094.84
p7_1_100.tif	4	95	2071.64
p7_1_100.tif	4	96	2034.19
p7_1_100.tif	4	97	1967.27
p7_1_100.tif	4	98	1938.1
p7_1_100.tif	4	99	1909.66
p7_1_100.tif	4	100	1879.34
p7_101_200.tif	4	101	1850.56
p7_101_200.tif	4	102	1833.16
p7_101_200.tif	4	103	1757.89
p7_101_200.tif	4	104	1738.27
p7_101_200.tif	4	105	1720.08
p7_101_200.tif	4	106	1697.63
p7_101_200.tif	4	107	1682.58
p7_101_200.tif	4	108	1665.03
p7_101_200.tif	4	109	1654.34
p7_101_200.tif	4	110	1642.54
p7_101_200.tif	4	111	1635.14
p7_101_200.tif	4	112	1611.75
p7_101_200.tif	4	113	1608.8
p7_101_200.tif	4	114	1591.54
p7_101_200.tif	4	115	1596.42
p7_101_200.tif	4	116	1579.56
p7_101_200.tif	4	117	1579.01
p7_101_200.tif	4	118	1566.09
p7_101_200.tif	4	119	1562.54
p7_101_200.tif	4	120	1556.09
p7_101_200.tif	4	121	1551.44
p7_101_200.tif	4	122	1548.7
p7_101_200.tif	4	123	1547.79
p7_101_200.tif	4	124	1533.3
p7_101_200.tif	4	125	1536.48
p7_101_200.tif	4	126	1531.12
p7_101_200.tif	4	127	1528.37
p7_101_200.tif	4	128	1533.22
p7_101_200.tif	4	129	1528.78
p7_101_200.tif	4	130	1516.68
p7_101_200.tif	4	131	1532.02
p7_101_200.tif	4	132	1524.67
p7_101_200.tif	4	133	1517.92
p7_101_200.tif	4	134	1520.78
p7_101_200.tif	4	135	1516.06
p7_101_200.tif	4	136	1515.64
p7_101_200.tif	4	137	1509.7
p7_101_200.tif	4	138	1517.92
p7_101_200.tif	4	139	1512.58
p7_101_200.tif	4	140	1513.64
p7_101_200.tif	4	141	1514.52
p7_101_200.tif	4	142	1509.3
p7_101_200.tif	4	143	1511.18
p7_101_200.tif	4	144	1494.23
p7_101_200.tif	4	145	1517.77
p7_101_200.tif	4	146	1507.45
p7_101_200.tif	4	147	1504.28
p7_101_200.tif	4	148	1513.76
p7_101_200.tif	4	149	1513.2
p7_101_200.tif	4	150	1510.52
p7_101_200.tif	4	151	1516.89
p7_101_200.tif	4	152	1578.34
p7_101_200.tif	4	153	1511.2
p7_101_200.tif	4	154	1510.08
p7_101_200.tif	4	155	1519.91
p7_101_200.tif	4	156	1509.15
p7_101_200.tif	4	157	1513.92
p7_101_200.tif	4	158	1516.98
p7_101_200.tif	4	159	1508.98
p7_101_200.tif	4	160	1514.07
p7_101_200.tif	4	161	1514.73
p7_101_200.tif	4	162	1510.77
p7_101_200.tif	4	163	1510.57
p7_101_200.tif	4	164	1517
p7_101_200.tif	4	165	1510.86
p7_101_200.tif	4	166	1514.47
p7_101_200.tif	4	167	1510.98
p7_101_200.tif	4	168	1511.6
p7_101_200.tif	4	169	1514.77
p7_101_200.tif	4	170	1514.71
p7_101_200.tif	4	171	1505.75
p7_101_200.tif	4	172	1511.11
p7_101_200.tif	4	173	1509.03
p7_101_200.tif	4	174	1508.13
p7_101_200.tif	4	175	1513.38
p7_101_200.tif	4	176	1515.25
p7_101_200.tif	4	177	1511.41
p7_101_200.tif	4	178	1509.03
p7_101_200.tif	4	179	1510.14
p7_101_200.tif	4	180	1512.78
p7_101_200.tif	4	181	1518.69
p7_101_200.tif	4	182	1515.53
p7_101_200.tif	4	183	1515.97
p7_101_200.tif	4	184	1511.88
p7_101_200.tif	4	185	1511.53
p7_101_200.tif	4	186	1514.55
p7_101_200.tif	4	187	1513.34
p7_101_200.tif	4	188	1514.84
p7_101_200.tif	4	189	1512.16
p7_101_200.tif	4	190	1512.2
p7_101_200.tif	4	191	1520.44
p7_101_200.tif	4	192	1519.56
p7_101_200.tif	4	193	1514.26
p7_101_200.tif	4	194	1516.64
p7_101_200.tif	4	195	1513.86
p7_101_200.tif	4	196	1517.21
p7_101_200.tif	4	197	1523.08
p7_101_200.tif	4	198	1515.97
p7_101_200.tif	4	199	1517.79
p7_101_200.tif	4	200	1513.6
p7_201_300.tif	4	201	1516.41
p7_201_300.tif	4	202	1517.94
p7_201_300.tif	4	203	1515.65
p7_201_300.tif	4	204	1517.37
p7_201_300.tif	4	205	1512.93
p7_201_300.tif	4	206	1512.22
p7_201_300.tif	4	207	1520.27
p7_201_300.tif	4	208	1518.12
p7_201_300.tif	4	209	1521.28
p7_201_300.tif	4	210	1520.73
p7_201_300.tif	4	211	1518.01
p7_201_300.tif	4	212	1525.69
p7_201_300.tif	4	213	1524.48
p7_201_300.tif	4	214	1520.46
p7_201_300.tif	4	215	1511.69
p7_201_300.tif	4	216	1526.21
p7_201_300.tif	4	217	1516.47
p7_201_300.tif	4	218	1514.11
p7_201_300.tif	4	219	1520.54
p7_201_300.tif	4	220	1518.86
p7_201_300.tif	4	221	1523.53
p7_201_300.tif	4	222	1524.66
p7_201_300.tif	4	223	1519.62
p7_201_300.tif	4	224	1514.94
p7_201_300.tif	4	225	1518.18
p7_201_300.tif	4	226	1522.4
p7_201_300.tif	4	227	1520.18
p7_201_300.tif	4	228	1522.17
p7_201_300.tif	4	229	1524.92
p7_201_300.tif	4	230	1523.13
p7_201_300.tif	4	231	1520.28
p7_201_300.tif	4	232	1521.41
p7_201_300.tif	4	233	1523.29
p7_201_300.tif	4	234	1521.12
p7_201_300.tif	4	235	1524.32
p7_201_300.tif	4	236	1521.12
p7_201_300.tif	4	237	1523.5
p7_201_300.tif	4	238	1522.92
p7_201_300.tif	4	239	1522.56
p7_201_300.tif	4	240	1516.58
p7_201_300.tif	4	241	1524.68
p7_201_300.tif	4	242	1524.29
p7_201_300.tif	4	243	1518.71
p7_201_300.tif	4	244	1516.89
p7_201_300.tif	4	245	1527.29
p7_201_300.tif	4	246	1525.22
p7_201_300.tif	4	247	1525.65
p7_201_300.tif	4	248	1524.84
p7_201_300.tif	4	249	1527.47
p7_201_300.tif	4	250	1522.32
p7_201_300.tif	4	251	1525.7
p7_201_300.tif	4	252	1529.29
p7_201_300.tif	4	253	1524.32
p7_201_300.tif	4	254	1530.39
p7_201_300.tif	4	255	1528.07
p7_201_300.tif	4	256	1528.26
p7_201_300.tif	4	257	1530.52
p7_201_300.tif	4	258	1524.76
p7_201_300.tif	4	259	1525.66
p7_201_300.tif	4	260	1530.34
p7_201_300.tif	4	261	1534.61
p7_201_300.tif	4	262	1533.23
p7_201_300.tif	4	263	1529.07
p7_201_300.tif	4	264	1532.12
p7_201_300.tif	4	265	1530.57
p7_201_300.tif	4	266	1532.08
p7_201_300.tif	4	267	1532.01
p7_201_300.tif	4	268	1534.14
p7_201_300.tif	4	269	1529.3
p7_201_300.tif	4	270	1531.33
p7_201_300.tif	4	271	1535.01
p7_201_300.tif	4	272	1536.32
p7_201_300.tif	4	273	1537.57
p7_201_300.tif	4	274	1533.76
p7_201_300.tif	4	275	1531.9
p7_201_300.tif	4	276	1531.39
p7_201_300.tif	4	277	1536.35
p7_201_300.tif	4	278	1535.01
p7_201_300.tif	4	279	1533.56
p7_201_300.tif	4	280	1532.41
p7_201_300.tif	4	281	1535.26
p7_201_300.tif	4	282	1533.86
p7_201_300.tif	4	283	1534.72
p7_201_300.tif	4	284	1538.15
p7_201_300.tif	4	285	1540.01
p7_201_300.tif	4	286	1537.56
p7_201_300.tif	4	287	1533.57
p7_201_300.tif	4	288	1536.39
p7_201_300.tif	4	289	1538.96
p7_201_300.tif	4	290	1536.93
p7_201_300.tif	4	291	1536.38
p7_201_300.tif	4	292	1538.16
p7_201_300.tif	4	293	1539.76
p7_201_300.tif	4	294	1543.45
p7_201_300.tif	4	295	1537.79
p7_201_300.tif	4	296	1537.21
p7_201_300.tif	4	297	1539.66
p7_201_300.tif	4	298	1545.93
p7_201_300.tif	4	299	1547.19
p7_201_300.tif	4	300	1533.31
p7_1_100.tif	5	1	2096.08
p7_1_100.tif	5	2	2084.47
p7_1_100.tif	5	3	2083
p7_1_100.tif	5	4	2089.38
p7_1_100.tif	5	5	2094.78
p7_1_100.tif	5	6	2086.86
p7_1_100.tif	5	7	2087.19
p7_1_100.tif	5	8	2091.39
p7_1_100.tif	5	9	2085.36
p7_1_100.tif	5	10	2093.28
p7_1_100.tif	5	11	2091.04
p7_1_100.tif	5	12	2094.57
p7_1_100.tif	5	13	2094.85
p7_1_100.tif	5	14	2098.36
p7_1_100.tif	5	15	2098.88
p7_1_100.tif	5	16	2099.12
p7_1_100.tif	5	17	1598.22
p7_1_100.tif	5	18	797.74
p7_1_100.tif	5	19	1137.39
p7_1_100.tif	5	20	2018.12
p7_1_100.tif	5	21	2125.27
p7_1_100.tif	5	22	2104.82
p7_1_100.tif	5	23	2080.66
p7_1_100.tif	5	24	2097.69
p7_1_100.tif	5	25	2102.05
p7_1_100.tif	5	26	2095.8
p7_1_100.tif	5	27	2093.63
p7_1_100.tif	5	28	2105.26
p7_1_100.tif	5	29	2101.87
p7_1_100.tif	5	30	2120.15
p7_1_100.tif	5	31	2111.08
p7_1_100.tif	5	32	2119.65
p7_1_100.tif	5	33	1721.59
p7_1_100.tif	5	34	2067.19
p7_1_100.tif	5	35	2099.7
p7_1_100.tif	5	36	2095.8
p7_1_100.tif	5	37	2113.31
p7_1_100.tif	5	38	2112.07
p7_1_100.tif	5	39	2100.45
p7_1_100.tif	5	40	2122.11
p7_1_100.tif	5	41	2125.34
p7_1_100.tif	5	42	2127.91
p7_1_100.tif	5	43	2131.98
p7_1_100.tif	5	44	2125.21
p7_1_100.tif	5	45	2125.26
p7_1_100.tif	5	46	2128.36
p7_1_100.tif	5	47	2129.99
p7_1_100.tif	5	48	2125.08
p7_1_100.tif	5	49	2126.36
p7_1_100.tif	5	50	2121.05
p7_1_100.tif	5	51	2131.9
p7_1_100.tif	5	52	2129.27
p7_1_100.tif	5	53	542.652
p7_1_100.tif	5	54	1504.12
p7_1_100.tif	5	55	2114.67
p7_1_100.tif	5	56	2133.85
p7_1_100.tif	5	57	2107.15
p7_1_100.tif	5	58	2121.48
p7_1_100.tif	5	59	2126.1
p7_1_100.tif	5	60	2133.59
p7_1_100.tif	5	61	2140.39
p7_1_100.tif	5	62	2160.38
p7_1_100.tif	5	63	2146.18
p7_1_100.tif	5	64	2111.62
p7_1_100.tif	5	65	2121.23
p7_1_100.tif	5	66	2126.05
p7_1_100.tif	5	67	2121.9
p7_1_100.tif	5	68	2367.38
p7_1_100.tif	5	69	2102.74
p7_1_100.tif	5	70	2111.98
p7_1_100.tif	5	71	2109.8
p7_1_100.tif	5	72	2115.96
p7_1_100.tif	5	73	2032.13
p7_1_100.tif	5	74	2112.73
p7_1_100.tif	5	75	2106.01
p7_1_100.tif	5	76	2090.32
p7_1_100.tif	5	77	2098.87
p7_1_100.tif	5	78	2092.24
p7_1_100.tif	5	79	2083.12
p7_1_100.tif	5	80	2059.98
p7_1_100.tif	5	81	2042.96
p7_1_100.tif	5	82	2029.69
p7_1_100.tif	5	83	2025.73
p7_1_100.tif	5	84	2023.77
p7_1_100.tif	5	85	2008.29
p7_1_100.tif	5	86	2001.35
p7_1_100.tif	5	87	1977.78
p7_1_100.tif	5	88	1954.62
p7_1_100.tif	5	89	1937.53
p7_1_100.tif	5	90	1903.18
p7_1_100.tif	5	91	1878.12
p7_1_100.tif	5	92	1853.52
p7_1_100.tif	5	93	1828.99
p7_1_100.tif	5	94	1785.03
p7_1_100.tif	5	95	1770.24
p7_1_100.tif	5	96	1744.41
p7_1_100.tif	5	97	1714.51
p7_1_100.tif	5	98	1691.93
p7_1_100.tif	5	99	1667.05
p7_1_100.tif	5	100	1646.27
p7_101_200.tif	5	101	1621.55
p7_101_200.tif	5	102	1602.2
p7_101_200.tif	5	103	1548.46
p7_101_200.tif	5	104	1536.47
p7_101_200.tif	5	105	1525.83
p7_101_200.tif	5	106	1508.75
p7_101_200.tif	5	107	1498.56
p7_101_200.tif	5	108	1490.45
p7_101_200.tif	5	109	1482.76
p7_101_200.tif	5	110	1473.28
p7_101_200.tif	5	111	1473.81
p7_101_200.tif	5	112	1454.45
p7_101_200.tif	5	113	1448.49
p7_101_200.tif	5	114	1448.27
p7_101_200.tif	5	115	1437.65
p7_101_200.tif	5	116	1435.2
p7_101_200.tif	5	117	1423.9
p7_101_200.tif	5	118	1428.69
p7_101_200.tif	5	119	1424.27
p7_101_200.tif	5	120	1418.25
p7_101_200.tif	5	121	1416.15
p7_101_200.tif	5	122	1415.99
p7_101_200.tif	5	123	1411.83
p7_101_200.tif	5	124	1406.79
p7_101_200.tif	5	125	1406.68
p7_101_200.tif	5	126	1402.23
p7_101_200.tif	5	127	1403.78
p7_101_200.tif	5	128	1404.61
p7_101_200.tif	5	129	1402.99
p7_101_200.tif	5	130	1401.01
p7_101_200.tif	5	131	1404.98
p7_101_200.tif	5	132	1406.36
p7_101_200.tif	5	133	1397.63
p7_101_200.tif	5	134	1398.71
p7_101_200.tif	5	135	1403.57
p7_101_200.tif	5	136	1401.11
p7_101_200.tif	5	137	1405.06
p7_101_200.tif	5	138	1393.88
p7_101_200.tif	5	139	1399.93
p7_101_200.tif	5	140	1390.13
p7_101_200.tif	5	141	1400.42
p7_101_200.tif	5	142	1402.76
p7_101_200.tif	5	143	1403.27
p7_101_200.tif	5	144	1398.34
p7_101_200.tif	5	145	1396.12
p7_101_200.tif	5	146	1394.36
p7_101_200.tif	5	147	1398.25
p7_101_200.tif	5	148	1401.01
p7_101_200.tif	5	149	1401.07
p7_101_200.tif	5	150	1400.41
p7_101_200.tif	5	151	1397.5
p7_101_200.tif	5	152	1402.46
p7_101_200.tif	5	153	1396.95
p7_101_200.tif	5	154	1407.76
p7_101_200.tif	5	155	1396.71
p7_101_200.tif	5	156	1393.77
p7_101_200.tif	5	157	1396.02
p7_101_200.tif	5	158	1401.31
p7_101_200.tif	5	159	1392
p7_101_200.tif	5	160	1399.1
p7_101_200.tif	5	161	1404.19
p7_101_200.tif	5	162	1396.84
p7_101_200.tif	5	163	1399.6
p7_101_200.tif	5	164	1399.06
p7_101_200.tif	5	165	1404.69
p7_101_200.tif	5	166	1396.07
p7_101_200.tif	5	167	1400.97
p7_101_200.tif	5	168	1400.11
p7_101_200.tif	5	169	1402.05
p7_101_200.tif	5	170	1398.96
p7_101_200.tif	5	171	1401.65
p7_101_200.tif	5	172	1402.81
p7_101_200.tif	5	173	1400.51
p7_101_200.tif	5	174	1403.52
p7_101_200.tif	5	175	1404.88
p7_101_200.tif	5	176	1395.55
p7_101_200.tif	5	177	1398.73
p7_101_200.tif	5	178	1396.27
p7_101_200.tif	5	179	1395.55
p7_101_200.tif	5	180	1403.1
p7_101_200.tif	5	181	1403.67
p7_101_200.tif	5	182	1400.14
p7_101_200.tif	5	183	1406.04
p7_101_200.tif	5	184	1404.64
p7_101_200.tif	5	185	1410.53
p7_101_200.tif	5	186	1404.7
p7_101_200.tif	5	187	1412.18
p7_101_200.tif	5	188	1402.65
p7_101_200.tif	5	189	1400.91
p7_101_200.tif	5	190	1407.47
p7_101_200.tif	5	191	1407.28
p7_101_200.tif	5	192	1410.13
p7_101_200.tif	5	193	1401.61
p7_101_200.tif	5	194	1406.5
p7_101_200.tif	5	195	1410.22
p7_101_200.tif	5	196	1411.54
p7_101_200.tif	5	197	1407.78
p7_101_200.tif	5	198	1411.11
p7_101_200.tif	5	199	1409.58
p7_101_200.tif	5	200	1407.98
p7_201_300.tif	5	201	1411.21
p7_201_300.tif	5	202	1405.41
p7_201_300.tif	5	203	1412.75
p7_201_300.tif	5	204	1411.83
p7_201_300.tif	5	205	1411.72
p7_201_300.tif	5	206	1411.98
p7_201_300.tif	5	207	1410.77
p7_201_300.tif	5	208	1409.65
p7_201_300.tif	5	209	1417.31
p7_201_300.tif	5	210	1411.75
p7_201_300.tif	5	211	1410.93
p7_201_300.tif	5	212	1419.65
p7_201_300.tif	5	213	1421.82
p7_201_300.tif	5	214	1409.95
p7_201_300.tif	5	215	1411.71
p7_201_300.tif	5	216	1416.58
p7_201_300.tif	5	217	1406.78
p7_201_300.tif	5	218	1414.97
p7_201_300.tif	5	219	1413.61
p7_201_300.tif	5	220	1416.43
p7_201_300.tif	5	221	1410.07
p7_201_300.tif	5	222	1414.73
p7_201_300.tif	5	223	1419.42
p7_201_300.tif	5	224	1411.89
p7_201_300.tif	5	225	1413.66
p7_201_300.tif	5	226	1407.75
p7_201_300.tif	5	227	1411.79
p7_201_300.tif	5	228	1411.94
p7_201_300.tif	5	229	1411.03
p7_201_300.tif	5	230	1423.41
p7_201_300.tif	5	231	1414.74
p7_201_300.tif	5	232	1416.46
p7_201_300.tif	5	233	1422.66
p7_201_300.tif	5	234	1412.49
p7_201_300.tif	5	235	1415.31
p7_201_300.tif	5	236	1432.58
p7_201_300.tif	5	237	1422.58
p7_201_300.tif	5	238	1427.79
p7_201_300.tif	5	239	1419.85
p7_201_300.tif	5	240	1414.93
p7_201_300.tif	5	241	1419.51
p7_201_300.tif	5	242	1424.97
p7_201_300.tif	5	243	1419.91
p7_201_300.tif	5	244	1422.59
p7_201_300.tif	5	245	1423.04
p7_201_300.tif	5	246	1422.56
p7_201_300.tif	5	247	1422.18
p7_201_300.tif	5	248	1426.2
p7_201_300.tif	5	249	1426.27
p7_201_300.tif	5	250	1428.97
p7_201_300.tif	5	251	1425.62
p7_201_300.tif	5	252	1421.44
p7_201_300.tif	5	253	1425.87
p7_201_300.tif	5	254	1426.51
p7_201_300.tif	5	255	1430.56
p7_201_300.tif	5	256	1425.78
p7_201_300.tif	5	257	1422.38
p7_201_300.tif	5	258	1431.35
p7_201_300.tif	5	259	1432.54
p7_201_300.tif	5	260	1432.68
p7_201_300.tif	5	261	1428.56
p7_201_300.tif	5	262	1425.32
p7_201_300.tif	5	263	1429.88
p7_201_300.tif	5	264	1425.68
p7_201_300.tif	5	265	1431
p7_201_300.tif	5	266	1432.92
p7_201_300.tif	5	267	1428.97
p7_201_300.tif	5	268	1438.32
p7_201_300.tif	5	269	1427.39
p7_201_300.tif	5	270	1433.51
p7_201_300.tif	5	271	1432.94
p7_201_300.tif	5	272	1443.01
p7_201_300.tif	5	273	1429.82
p7_201_300.tif	5	274	1444.88
p7_201_300.tif	5	275	1437.43
p7_201_300.tif	5	276	1444.51
p7_201_300.tif	5	277	1439.57
p7_201_300.tif	5	278	1444.57
p7_201_300.tif	5	279	1431.27
p7_201_300.tif	5	280	1439.76
p7_201_300.tif	5	281	1432.95
p7_201_300.tif	5	282	1438.19
p7_201_300.tif	5	283	1447.6
p7_201_300.tif	5	284	1440.22
p7_201_300.tif	5	285	1442.46
p7_201_300.tif	5	286	1437.2
p7_201_300.tif	5	287	1435.14
p7_201_300.tif	5	288	1450.01
p7_201_300.tif	5	289	1441.05
p7_201_300.tif	5	290	1441.84
p7_201_300.tif	5	291	1440.73
p7_201_300.tif	5	292	1442.03
p7_201_300.tif	5	293	1441.24
p7_201_300.tif	5	294	1439.93
p7_201_300.tif	5	295	1438.79
p7_201_300.tif	5	296	1448.62
p7_201_300.tif	5	297	1441.73
p7_201_300.tif	5	298	1445.88
p7_201_300.tif	5	299	1446.35
p7_201_300.tif	5	300	1438.82
p7_1_100.tif	6	1	1725.43
p7_1_100.tif	6	2	1729.63
p7_1_100.tif	6	3	1731.35
p7_1_100.tif	6	4	1732.45
p7_1_100.tif	6	5	1734.48
p7_1_100.tif	6	6	1735.14
p7_1_100.tif	6	7	1734.87
p7_1_100.tif	6	8	1732.71
p7_1_100.tif	6	9	1732.41
p7_1_100.tif	6	10	1733.69
p7_1_100.tif	6	11	1735.65
p7_1_100.tif	6	12	1731.02
p7_1_100.tif	6	13	1736.42
p7_1_100.tif	6	14	1734.6
p7_1_100.tif	6	15	1740.38
p7_1_100.tif	6	16	1739.02
p7_1_100.tif	6	17	1300.54
p7_1_100.tif	6	18	593.966
p7_1_100.tif	6	19	862.835
p7_1_100.tif	6	20	1631.86
p7_1_100.tif	6	21	1757.24
p7_1_100.tif	6	22	1742.53
p7_1_100.tif	6	23	1734.99
p7_1_100.tif	6	24	1748.96
p7_1_100.tif	6	25	1736.31
p7_1_100.tif	6	26	1741.67
p7_1_100.tif	6	27	1747.27
p7_1_100.tif	6	28	1743.06
p7_1_100.tif	6	29	1744.83
p7_1_100.tif	6	30	1751.88
p7_1_100.tif	6	31	1738.24
p7_1_100.tif	6	32	1745.97
p7_1_100.tif	6	33	1228.08
p7_1_100.tif	6	34	1629.55
p7_1_100.tif	6	35	1746.06
p7_1_100.tif	6	36	1742.82
p7_1_100.tif	6	37	1746.86
p7_1_100.tif	6	38	1747.35
p7_1_100.tif	6	39	1726.17
p7_1_100.tif	6	40	1758.17
p7_1_100.tif	6	41	1763.19
p7_1_100.tif	6	42	1753.47
p7_1_100.tif	6	43	1758.75
p7_1_100.tif	6	44	1751.27
p7_1_100.tif	6	45	1753.56
p7_1_100.tif	6	46	1748.28
p7_1_100.tif	6	47	1752.93
p7_1_100.tif	6	48	1751.41
p7_1_100.tif	6	49	1747.41
p7_1_100.tif	6	50	1756.96
p7_1_100.tif	6	51	1749.74
p7_1_100.tif	6	52	1751.48
p7_1_100.tif	6	53	357.304
p7_1_100.tif	6	54	1088.88
p7_1_100.tif	6	55	1728.75
p7_1_100.tif	6	56	1754.98
p7_1_100.tif	6	57	1763.34
p7_1_100.tif	6	58	1757.72
p7_1_100.tif	6	59	1754.89
p7_1_100.tif	6	60	1750.4
p7_1_100.tif	6	61	1752.29
p7_1_100.tif	6	62	1752.93
p7_1_100.tif	6	63	1750.89
p7_1_100.tif	6	64	1754.79
p7_1_100.tif	6	65	1754.11
p7_1_100.tif	6	66	1747.5
p7_1_100.tif	6	67	1745.04
p7_1_100.tif	6	68	1746.57
p7_1_100.tif	6	69	2986.82
p7_1_100.tif	6	70	1677.26
p7_1_100.tif	6	71	1756.4
p7_1_100.tif	6	72	1732.98
p7_1_100.tif	6	73	1744.69
p7_1_100.tif	6	74	1734.33
p7_1_100.tif	6	75	1718.15
p7_1_100.tif	6	76	1730.79
p7_1_100.tif	6	77	1728.69
p7_1_100.tif	6	78	1721.4
p7_1_100.tif	6	79	1726.52
p7_1_100.tif	6	80	1731.21
p7_1_100.tif	6	81	1720.49
p7_1_100.tif	6	82	1712.48
p7_1_100.tif	6	83	1680.62
p7_1_100.tif	6	84	1680.8
p7_1_100.tif	6	85	1663.01
p7_1_100.tif	6	86	1655.36
p7_1_100.tif	6	87	1635.47
p7_1_100.tif	6	88	1630.99
p7_1_100.tif	6	89	1626.36
p7_1_100.tif	6	90	1603.36
p7_1_100.tif	6	91	1582.04
p7_1_100.tif	6	92	1554.45
p7_1_100.tif	6	93	1528.45
p7_1_100.tif	6	94	1498.4
p7_1_100.tif	6	95	1462.66
p7_1_100.tif	6	96	1447.28
p7_1_100.tif	6	97	1414.24
p7_1_100.tif	6	98	1383.87
p7_1_100.tif	6	99	1364.9
p7_1_100.tif	6	100	1432.48
p7_101_200.tif	6	101	1329.62
p7_101_200.tif	6	102	1319.61
p7_101_200.tif	6	103	1262.4
p7_101_200.tif	6	104	1254.21
p7_101_200.tif	6	105	1247.57
p7_101_200.tif	6	106	1238.86
p7_101_200.tif	6	107	1228.72
p7_101_200.tif	6	108	1220.57
p7_101_200.tif	6	109	1214.24
p7_101_200.tif	6	110	1204.45
p7_101_200.tif	6	111	1191.91
p7_101_200.tif	6	112	1187.46
p7_101_200.tif	6	113	1184.78
p7_101_200.tif	6	114	1184.6
p7_101_200.tif	6	115	1187.9
p7_101_200.tif	6	116	1178.75
p7_101_200.tif	6	117	1176.3
p7_101_200.tif	6	118	1174.83
p7_101_200.tif	6	119	1172.73
p7_101_200.tif	6	120	1172.38
p7_101_200.tif	6	121	1166.4
p7_101_200.tif	6	122	1163.61
p7_101_200.tif	6	123	1167.03
p7_101_200.tif	6	124	1163.3
p7_101_200.tif	6	125	1158.92
p7_101_200.tif	6	126	1167.42
p7_101_200.tif	6	127	1159.44
p7_101_200.tif	6	128	1156.24
p7_101_200.tif	6	129	1162.19
p7_101_200.tif	6	130	1163.39
p7_101_200.tif	6	131	1151.93
p7_101_200.tif	6	132	1158.43
p7_101_200.tif	6	133	1158.48
p7_101_200.tif	6	134	1150.37
p7_101_200.tif	6	135	1158.04
p7_101_200.tif	6	136	1149.49
p7_101_200.tif	6	137	1147.92
p7_101_200.tif	6	138	1159.16
p7_101_200.tif	6	139	1160.39
p7_101_200.tif	6	140	1151.28
p7_101_200.tif	6	141	1149.6
p7_101_200.tif	6	142	1152.25
p7_101_200.tif	6	143	1153.3
p7_101_200.tif	6	144	1151.59
p7_101_200.tif	6	145	1154.38
p7_101_200.tif	6	146	1151.6
p7_101_200.tif	6	147	1155.08
p7_101_200.tif	6	148	1160.99
p7_101_200.tif	6	149	1156.41
p7_101_200.tif	6	150	1157.4
p7_101_200.tif	6	151	1154.89
p7_101_200.tif	6	152	1150.48
p7_101_200.tif	6	153	1155.12
p7_101_200.tif	6	154	1122.14
p7_101_200.tif	6	155	1158.13
p7_101_200.tif	6	156	1154.33
p7_101_200.tif	6	157	1153.49
p7_101_200.tif	6	158	1151.75
p7_101_200.tif	6	159	1157.73
p7_101_200.tif	6	160	1157.77
p7_101_200.tif	6	161	1157.44
p7_101_200.tif	6	162	1153.97
p7_101_200.tif	6	163	1153.66
p7_101_200.tif	6	164	1153.69
p7_101_200.tif	6	165	1156.87
p7_101_200.tif	6	166	1156.03
p7_101_200.tif	6	167	1160.43
p7_101_200.tif	6	168	1149.83
p7_101_200.tif	6	169	1157.83
p7_101_200.tif	6	170	1154.76
p7_101_200.tif	6	171	1159.74
p7_101_200.tif	6	172	1151.73
p7_101_200.tif	6	173	1160.04
p7_101_200.tif	6	174	1151.31
p7_101_200.tif	6	175	1160.55
p7_101_200.tif	6	176	1157.34
p7_101_200.tif	6	177	1158.99
p7_101_200.tif	6	178	1159.33
p7_101_200.tif	6	179	1157.49
p7_101_200.tif	6	180	1161.8
p7_101_200.tif	6	181	1152.27
p7_101_200.tif	6	182	1152.74
p7_101_200.tif	6	183	1156.08
p7_101_200.tif	6	184	1158.92
p7_101_200.tif	6	185	1158.82
p7_101_200.tif	6	186	1149.01
p7_101_200.tif	6	187	1162.79
p7_101_200.tif	6	188	1159.65
p7_101_200.tif	6	189	1156.36
p7_101_200.tif	6	190	1154.68
p7_101_200.tif	6	191	1156.54
p7_101_200.tif	6	192	1162.92
p7_101_200.tif	6	193	1155.32
p7_101_200.tif	6	194	1157.77
p7_101_200.tif	6	195	1163.26
p7_101_200.tif	6	196	1157.3
p7_101_200.tif	6	197	1158.39
p7_101_200.tif	6	198	1168.6
p7_101_200.tif	6	199	1160.01
p7_101_200.tif	6	200	1163.92
p7_201_300.tif	6	201	1161
p7_201_300.tif	6	202	1160.92
p7_201_300.tif	6	203	1163.77
p7_201_300.tif	6	204	1160.71
p7_201_300.tif	6	205	1159.16
p7_201_300.tif	6	206	1164.4
p7_201_300.tif	6	207	1158.06
p7_201_300.tif	6	208	1155.14
p7_201_300.tif	6	209	1157.52
p7_201_300.tif	6	210	1154.24
p7_201_300.tif	6	211	1154.82
p7_201_300.tif	6	212	1156.67
p7_201_300.tif	6	213	1158.16
p7_201_300.tif	6	214	1160.87
p7_201_300.tif	6	215	1163.38
p7_201_300.tif	6	216	1158.83
p7_201_300.tif	6	217	1164.68
p7_201_300.tif	6	218	1164.51
p7_201_300.tif	6	219	1168.16
p7_201_300.tif	6	220	1160.76
p7_201_300.tif	6	221	1164.23
p7_201_300.tif	6	222	1161.12
p7_201_300.tif	6	223	1156.45
p7_201_300.tif	6	224	1167.31
p7_201_300.tif	6	225	1163.99
p7_201_300.tif	6	226	1165.06
p7_201_300.tif	6	227	1160.25
p7_201_300.tif	6	228	1161.57
p7_201_300.tif	6	229	1161.24
p7_201_300.tif	6	230	1167.77
p7_201_300.tif	6	231	1163.04
p7_201_300.tif	6	232	1163.87
p7_201_300.tif	6	233	1161.26
p7_201_300.tif	6	234	1170.52
p7_201_300.tif	6	235	1158.65
p7_201_300.tif	6	236	1167.4
p7_201_300.tif	6	237	1162.93
p7_201_300.tif	6	238	1158.24
p7_201_300.tif	6	239	1160.09
p7_201_300.tif	6	240	1167.3
p7_201_300.tif	6	241	1160.88
p7_201_300.tif	6	242	1167.11
p7_201_300.tif	6	243	1170.33
p7_201_300.tif	6	244	1159.66
p7_201_300.tif	6	245	1165.89
p7_201_300.tif	6	246	1170.72
p7_201_300.tif	6	247	1172.43
p7_201_300.tif	6	248	1166.3
p7_201_300.tif	6	249	1173.17
p7_201_300.tif	6	250	1166.6
p7_201_300.tif	6	251	1169.35
p7_201_300.tif	6	252	1173.65
p7_201_300.tif	6	253	1164.46
p7_201_300.tif	6	254	1164.27
p7_201_300.tif	6	255	1169.25
p7_201_300.tif	6	256	1173.96
p7_201_300.tif	6	257	1170.77
p7_201_300.tif	6	258	1162.44
p7_201_300.tif	6	259	1169.95
p7_201_300.tif	6	260	1172.46
p7_201_300.tif	6	261	1170.72
p7_201_300.tif	6	262	1167.52
p7_201_300.tif	6	263	1173.69
p7_201_300.tif	6	264	1166.79
p7_201_300.tif	6	265	1168.1
p7_201_300.tif	6	266	1182.68
p7_201_300.tif	6	267	1168.15
p7_201_300.tif	6	268	1175.82
p7_201_300.tif	6	269	1175.17
p7_201_300.tif	6	270	1171.56
p7_201_300.tif	6	271	1173.82
p7_201_300.tif	6	272	1177.06
p7_201_300.tif	6	273	1173.12
p7_201_300.tif	6	274	1180.11
p7_201_300.tif	6	275	1173.68
p7_201_300.tif	6	276	1175.88
p7_201_300.tif	6	277	1176.8
p7_201_300.tif	6	278	1173.28
p7_201_300.tif	6	279	1175.88
p7_201_300.tif	6	280	1177.32
p7_201_300.tif	6	281	1178.22
p7_201_300.tif	6	282	1178.55
p7_201_300.tif	6	283	1170.82
p7_201_300.tif	6	284	1175.62
p7_201_300.tif	6	285	1169.32
p7_201_300.tif	6	286	1180.01
p7_201_300.tif	6	287	1178.18
p7_201_300.tif	6	288	1176.82
p7_201_300.tif	6	289	1175.87
p7_201_300.tif	6	290	1175.25
p7_201_300.tif	6	291	1176.25
p7_201_300.tif	6	292	1190.27
p7_201_300.tif	6	293	1180.83
p7_201_300.tif	6	294	1179.56
p7_201_300.tif	6	295	1185.48
p7_201_300.tif	6	296	1185.58
p7_201_300.tif	6	297	1177.91
p7_201_300.tif	6	298	1174.73
p7_201_300.tif	6	299	1181.27
p7_201_300.tif	6	300	1183.63
p7_1_100.tif	7	1	1280.59
p7_1_100.tif	7	2	1282.74
p7_1_100.tif	7	3	1285.23
p7_1_100.tif	7	4	1288.58
p7_1_100.tif	7	5	1283.29
p7_1_100.tif	7	6	1289.74
p7_1_100.tif	7	7	1289.27
p7_1_100.tif	7	8	1292.19
p7_1_100.tif	7	9	1288.77
p7_1_100.tif	7	10	1290.94
p7_1_100.tif	7	11	1288.65
p7_1_100.tif	7	12	1286.27
p7_1_100.tif	7	13	1283.96
p7_1_100.tif	7	14	1289.22
p7_1_100.tif	7	15	1300.54
p7_1_100.tif	7	16	1295.68
p7_1_100.tif	7	17	957.448
p7_1_100.tif	7	18	411.477
p7_1_100.tif	7	19	590.297
p7_1_100.tif	7	20	1168.95
p7_1_100.tif	7	21	1308.63
p7_1_100.tif	7	22	1285.48
p7_1_100.tif	7	23	1288.75
p7_1_100.tif	7	24	1292.2
p7_1_100.tif	7	25	1291.56
p7_1_100.tif	7	26	1287.05
p7_1_100.tif	7	27	1292.32
p7_1_100.tif	7	28	1296.99
p7_1_100.tif	7	29	1299.56
p7_1_100.tif	7	30	1288.22
p7_1_100.tif	7	31	1281.87
p7_1_100.tif	7	32	1285.34
p7_1_100.tif	7	33	846.443
p7_1_100.tif	7	34	1045.21
p7_1_100.tif	7	35	1292.41
p7_1_100.tif	7	36	1289.84
p7_1_100.tif	7	37	1289.16
p7_1_100.tif	7	38	1294.35
p7_1_100.tif	7	39	1282.03
p7_1_100.tif	7	40	1312.35
p7_1_100.tif	7	41	1311.02
p7_1_100.tif	7	42	1314.11
p7_1_100.tif	7	43	1306.63
p7_1_100.tif	7	44	1305.03
p7_1_100.tif	7	45	1303.65
p7_1_100.tif	7	46	1307.96
p7_1_100.tif	7	47	1305.42
p7_1_100.tif	7	48	1308.71
p7_1_100.tif	7	49	1298.66
p7_1_100.tif	7	50	1303.02
p7_1_100.tif	7	51	1304.14
p7_1_100.tif	7	52	1297.94
p7_1_100.tif	7	53	236.251
p7_1_100.tif	7	54	773.389
p7_1_100.tif	7	55	1270.13
p7_1_100.tif	7	56	1300.33
p7_1_100.tif	7	57	1305.07
p7_1_100.tif	7	58	1296.17
p7_1_100.tif	7	59	1300.59
p7_1_100.tif	7	60	1308.35
p7_1_100.tif	7	61	1310.17
p7_1_100.tif	7	62	1316.59
p7_1_100.tif	7	63	1319.32
p7_1_100.tif	7	64	1313.15
p7_1_100.tif	7	65	1300.87
p7_1_100.tif	7	66	1303.87
p7_1_100.tif	7	67	1307.93
p7_1_100.tif	7	68	1299.2
p7_1_100.tif	7	69	1300.15
p7_1_100.tif	7	70	1408.57
p7_1_100.tif	7	71	1066.53
p7_1_100.tif	7	72	1291.66
p7_1_100.tif	7	73	1289.17
p7_1_100.tif	7	74	1292.72
p7_1_100.tif	7	75	1282.75
p7_1_100.tif	7	76	1285.92
p7_1_100.tif	7	77	1287.52
p7_1_100.tif	7	78	1277.79
p7_1_100.tif	7	79	1274.13
p7_1_100.tif	7	80	1270.56
p7_1_100.tif	7	81	1261.44
p7_1_100.tif	7	82	1256.25
p7_1_100.tif	7	83	1240.29
p7_1_100.tif	7	84	1222.52
p7_1_100.tif	7	85	1204.58
p7_1_100.tif	7	86	1194.34
p7_1_100.tif	7	87	1189.04
p7_1_100.tif	7	88	1183.88
p7_1_100.tif	7	89	1192.35
p7_1_100.tif	7	90	1185.28
p7_1_100.tif	7	91	1182.08
p7_1_100.tif	7	92	1163.69
p7_1_100.tif	7	93	1152.04
p7_1_100.tif	7	94	1133.4
p7_1_100.tif	7	95	1114.78
p7_1_100.tif	7	96	1087.39
p7_1_100.tif	7	97	1074.71
p7_1_100.tif	7	98	1047.56
p7_1_100.tif	7	99	1035.23
p7_1_100.tif	7	100	1017.77
p7_101_200.tif	7	101	1055.87
p7_101_200.tif	7	102	984.152
p7_101_200.tif	7	103	955.67
p7_101_200.tif	7	104	944.412
p7_101_200.tif	7	105	938.513
p7_101_200.tif	7	106	932.214
p7_101_200.tif	7	107	929.964
p7_101_200.tif	7	108	918.775
p7_101_200.tif	7	109	909.178
p7_101_200.tif	7	110	904.45
p7_101_200.tif	7	111	904.282
p7_101_200.tif	7	112	897.851
p7_101_200.tif	7	113	896.179
p7_101_200.tif	7	114	894.984
p7_101_200.tif	7	115	883.269
p7_101_200.tif	7	116	887.176
p7_101_200.tif	7	117	883.976
p7_101_200.tif	7	118	882.229
p7_101_200.tif	7	119	879.729
p7_101_200.tif	7	120	882.584
p7_101_200.tif	7	121	879.61
p7_101_200.tif	7	122	869.519
p7_101_200.tif	7	123	874.41
p7_101_200.tif	7	124	874.96
p7_101_200.tif	7	125	874.54
p7_101_200.tif	7	126	881.079
p7_101_200.tif	7	127	871.646
p7_101_200.tif	7	128	869.152
p7_101_200.tif	7	129	869.443
p7_101_200.tif	7	130	863.816
p7_101_200.tif	7	131	872.426
p7_101_200.tif	7	132	869.239
p7_101_200.tif	7	133	870.495
p7_101_200.tif	7	134	861.314
p7_101_200.tif	7	135	871.757
p7_101_200.tif	7	136	875.163
p7_101_200.tif	7	137	865.874
p7_101_200.tif	7	138	862.387
p7_101_200.tif	7	139	866.69
p7_101_200.tif	7	140	872.987
p7_101_200.tif	7	141	868.6
p7_101_200.tif	7	142	866.536
p7_101_200.tif	7	143	865.328
p7_101_200.tif	7	144	864.066
p7_101_200.tif	7	145	868.717
p7_101_200.tif	7	146	866.422
p7_101_200.tif	7	147	877.857
p7_101_200.tif	7	148	864.945
p7_101_200.tif	7	149	866.429
p7_101_200.tif	7	150	867.768
p7_101_200.tif	7	151	865.449
p7_101_200.tif	7	152	873.263
p7_101_200.tif	7	153	864.468
p7_101_200.tif	7	154	864.026
p7_101_200.tif	7	155	841.844
p7_101_200.tif	7	156	868.242
p7_101_200.tif	7	157	862.05
p7_101_200.tif	7	158	866.582
p7_101_200.tif	7	159	868.535
p7_101_200.tif	7	160	860.868
p7_101_200.tif	7	161	863.941
p7_101_200.tif	7	162	865.064
p7_101_200.tif	7	163	868.605
p7_101_200.tif	7	164	858.232
p7_101_200.tif	7	165	860.711
p7_101_200.tif	7	166	862.408
p7_101_200.tif	7	167	860.143
p7_101_200.tif	7	168	862.885
p7_101_200.tif	7	169	871.114
p7_101_200.tif	7	170	872.019
p7_101_200.tif	7	171	866.59
p7_101_200.tif	7	172	865.711
p7_101_200.tif	7	173	860.114
p7_101_200.tif	7	174	863.535
p7_101_200.tif	7	175	866.389
p7_101_200.tif	7	176	859.375
p7_101_200.tif	7	177	864.435
p7_101_200.tif	7	178	866.128
p7_101_200.tif	7	179	871.772
p7_101_200.tif	7	180	859.82
p7_101_200.tif	7	181	867.111
p7_101_200.tif	7	182	871.008
p7_101_200.tif	7	183	868.264
p7_101_200.tif	7	184	874.196
p7_101_200.tif	7	185	859.468
p7_101_200.tif	7	186	874.173
p7_101_200.tif	7	187	872.565
p7_101_200.tif	7	188	868.47
p7_101_200.tif	7	189	862.682
p7_101_200.tif	7	190	871.619
p7_101_200.tif	7	191	854.968
p7_101_200.tif	7	192	869.015
p7_101_200.tif	7	193	864.665
p7_101_200.tif	7	194	869.667
p7_101_200.tif	7	195	867.019
p7_101_200.tif	7	196	859.93
p7_101_200.tif	7	197	863.984
p7_101_200.tif	7	198	867.841
p7_101_200.tif	7	199	873.74
[truncated: 4,901 more rows]

## Sheet: Sheet2
Frame	s	1	2	3	4	5	6	7	8	9	12	15	16	17	19	20	22	23																													Frame	1	2
1	0	1158.93	1429.28	1489.51	2204.79	2096.08	1725.43	1280.59	1239.23	1961.92	1262.89	2135.53	1016.38	1873.04	2672.38	1286.04	2591.85	1808.44																													1	100	100
2	0.1	1160.24	1431.71	1493.41	2201.24	2084.47	1729.63	1282.74	1243.94	1961.66	1270.73	2127.31	1011.8	1866.99	2676.48	1291.62	2592.78	1805.94																													2	100.113	100.171
3	0.2	1149.98	1425.09	1491.21	2197.72	2083	1731.35	1285.23	1238.83	1957.3	1259.95	2130.74	1009	1875.7	2663.4	1295.11	2597.11	1799.37																													3	99.2272	99.7071
4	0.3	1149.41	1423.14	1491.09	2200.58	2089.38	1732.45	1288.58	1237.12	1964.3	1257.67	2132.99	1021.11	1872.99	2669.48	1293.14	2591.14	1804.13																													4	99.178	99.5708
5	0.4	1161.71	1423.08	1492.13	2206.27	2094.78	1734.48	1283.29	1238.87	1951.1	1273.16	2125.25	1014.73	1877.04	2672.23	1295.8	2595.65	1800.26																													5	100.24	99.5663
6	0.5	1155.34	1424.21	1488.8	2199.15	2086.86	1735.14	1289.74	1240.78	1959.55	1265.74	2131.51	1013.06	1873.5	2665.4	1286.72	2591.35	1803.1																													6	99.6903	99.6456
7	0.6	1162.77	1427.05	1488.38	2213.23	2087.19	1734.87	1289.27	1234.52	1959.35	1270.74	2124.71	1018.2	1878.18	2669.57	1288.2	2590.28	1807.35																													7	100.331	99.8445
8	0.7	1164.66	1420.32	1488.81	2206.26	2091.39	1732.71	1292.19	1242.97	1961.97	1273.1	2132.29	1012.97	1875.8	2672.57	1285.68	2584.8	1811.87																													8	100.494	99.3732
9	0.8	1170.86	1424.74	1492.58	2208.09	2085.36	1732.41	1288.77	1244.57	1961.91	1264.06	2140.06	1013.09	1875.32	2666.7	1289.47	2592.97	1807.65																													9	101.029	99.6824
10	0.9	1169.9	1431.06	1496.09	2216.04	2093.28	1733.69	1290.94	1248.2	1966.28	1261.27	2129.66	1014.11	1872.63	2666.78	1289.38	2598.03	1802.81																													10	100.946	100.125
11	1	1165.06	1428.76	1491.82	2203.43	2091.04	1735.65	1288.65	1241.6	1960.03	1273.88	2141.39	1022.15	1871.11	2670.24	1292.46	2600.5	1808.69																													11	100.529	99.9641
12	1.1	1159.84	1426.53	1489.73	2213.93	2094.57	1731.02	1286.27	1242.84	1957.62	1269.97	2133.52	1016.29	1872.43	2667.02	1286.06	2597.81	1803.28																													12	100.078	99.808
13	1.2	1159.12	1429.53	1489.95	2207.12	2094.85	1736.42	1283.96	1242.95	1961.68	1271.32	2135.78	1026.85	1876.87	2672.42	1290.12	2598.85	1803.64																													13	100.016	100.018
14	1.3	1158.72	1430.86	1490.96	2215.31	2098.36	1734.6	1289.22	1239.39	1958.38	1269.93	2138.12	1007.29	1872.23	2676.01	1294.2	2592.19	1798.08																													14	99.9815	100.111
15	1.4	1164.93	1426.77	1495.88	2221.17	2098.88	1740.38	1300.54	1242.25	1967.96	1273.93	2137.84	1035.19	1867.69	2680.24	1289.69	2602.84	1813.66																													15	100.518	99.825
16	1.5	1168.72	1428.98	1498.15	2218.43	2099.12	1739.02	1295.68	1238.82	1967.26	1275.22	2143.58	1019.38	1874.58	2669.75	1301.2	2602.32	1809.59																													16	100.845	99.9794
17	1.6																																														17
18	1.7																																														18
19	1.8																																														19
20	1.9	1143.3	1397.4		2185.1																																										20	98.6509	97.7699
21	2	1191.6	1461.19	1522.68	2248.21	2125.27	1757.24	1308.63	1256.21	1995.72	1285.58	2169.35	1041.29	1906.75			2650.31	1834.05																													21	102.819	102.233
22	2.1	1178.61	1435.67	1497.35	2218.67	2104.82	1742.53	1285.48	1252.49	1975.95	1269.93	2145.2	1013.65	1878.73	2713.39		2620.71	1816.7																													22	101.697	100.447
23	2.2	1163.77	1431.27	1496.06	2210.57	2080.66	1734.99	1288.75	1241.9	1969.6	1278.59	2145.69	1027.55	1877.02	2693.2		2598.2	1801.6																													23	100.417	100.14
24	2.3	1170.87	1435.32	1495.34	2225.68	2097.69	1748.96	1292.2	1248.65	1983.27	1283.03	2149.13	1034.75	1890.06	2699.78	1291.74	2612.59	1812.62																													24	101.03	100.423
25	2.4	1176.11	1434.6	1502.96	2232.68	2102.05	1736.31	1291.56	1244.65	1975.22	1281.46	2153.47	1032.4	1884.83	2703.58	1298.37	2623.71	1816.73																													25	101.482	100.373
26	2.5	1176.23	1439.97	1502.11	2225.94	2095.8	1741.67	1287.05	1245.15	1978.17	1285.4	2150.98	1033.47	1881.25	2698.38	1296.86	2624.05	1830.88																													26	101.493	100.748
27	2.6	1172.12	1441.62	1500.13	2218.21	2093.63	1747.27	1292.32	1245.19	1974.05	1278.11	2151	1042.64	1891.41	2688.83	1298.15	2632.42	1821.98																													27	101.138	100.864
28	2.7	1176.5	1442.22	1498.48	2222.4	2105.26	1743.06	1296.99	1246.2	1974.15	1282.17	2147.59	1037.43	1890.54	2688.71	1295.22	2629.7	1828.95																													28	101.516	100.906
29	2.8	1170.92	1439.37	1502.93	2225.47	2101.87	1744.83	1299.56	1246.44	1977.82	1282.78	2152.54	1034.55	1884.72	2693.39	1302.34	2635.67	1835.58																													29	101.034	100.706
30	2.9	1194.97	1436.56	1514.37	2253.66	2120.15	1751.88	1288.22	1208.61	1967.76	1265.87	2144.95			2670.62		2612.21	1804.82																													30	103.11	100.51
31	3	1176.72	1446.38	1502.01	2234.33	2111.08	1738.24	1281.87	1225.49	1963.61	1278.89	2137.97	1041.01		2697.51	1298.63	2619.97	1825.94																													31	101.535	101.197
32	3.1	1159.12	1433.16	1495.42	2220.42	2119.65	1745.97	1285.34	1226.73	1949.72	1282.63		1046.33	1875.71	2679.22	1310.02	2631.81	1840.54																													32	100.016	100.272
33	3.2																																														33
34	3.3																																														34
35	3.4	1172.91	1434.83	1502.59	2219.46	2099.7	1746.06	1292.41	1231.17	1980.22	1279.94	2131.93	1015.83	1892.76			2632.83	1814.37																													35	101.206	100.389
36	3.5	1178.21	1436.85	1502.58	2221.63	2095.8	1742.82	1289.84	1234.21	1974.82	1285.57	2160.59	1012.83	1876.8			2628.17	1812.05																													36	101.663	100.53
37	3.6	1182.68	1452.67	1508.17	2241.38	2113.31	1746.86	1289.16	1239.65	1976.14	1285.72	2160.34	1032.97	1875.53	2705.5	1298.74	2626.1	1818.09																													37	102.049	101.637
38	3.7	1181.18	1456.19	1516.08	2238.55	2112.07	1747.35	1294.35	1248.62	1978.16	1281.51	2161.02	1033.81	1882.45	2704.88	1298.9	2625.22	1817.23																													38	101.92	101.883
39	3.8	1181.23	1441.24	1503.72	2233.18	2100.45		1282.03		1958.17	1273.39	2135.46	1011.32		2690.68		2618.01																														39	101.924	100.837
40	3.9	1183.91	1463.18	1529.19	2241.9	2122.11	1758.17	1312.35	1254.81	1980.74	1282.15	2157.12	1043.46	1885.64	2696.68	1295.72	2635.44	1832.02																													40	102.155	102.372
41	4	1190.92	1459.15	1520.22	2247.51	2125.34	1763.19	1311.02	1262.52	1973.62	1293.35	2158.02	1056.33	1888.4	2702.19	1304.76	2651.11	1835.73																													41	102.76	102.09
42	4.1	1188.2	1463.52	1525.72	2234.05	2127.91	1753.47	1314.11	1257.52	1977.5	1286.41	2167.28	1062.53	1896.72	2697.62	1298.51	2636.85	1836.13																													42	102.526	102.396
43	4.2	1185.59	1453.58	1519.83	2234.7	2131.98	1758.75	1306.63	1259.67	1986.4	1289.36	2160.42	1048.63	1890.25	2698.69	1298.11	2640.23	1835.49																													43	102.3	101.7
44	4.3	1181.31	1458.74	1522.22	2233.21	2125.21	1751.27	1305.03	1251.89	1984.39	1288.87	2161.95	1058.86	1893.54	2700.15	1301.21	2640.03	1843.77																													44	101.931	102.061
45	4.4	1183.12	1452.28	1516.84	2244.13	2125.26	1753.56	1303.65	1254.33	1987.92	1285.52	2159.04	1047.91	1896.04	2698.33	1308.57	2631.14	1832.12																													45	102.087	101.61
46	4.5	1186.76	1458.3	1514.2	2238.07	2128.36	1748.28	1307.96	1261.07	1996.19	1290.63	2166.99	1051.24	1898.6	2697.7	1295.12	2648.11	1831.47																													46	102.401	102.031
47	4.6	1197.11	1443.95	1510.85	2241.9	2129.99	1752.93	1305.42	1260.99	1982.48	1290.18	2163.07	1060.52	1903.11	2697.83	1291.93	2636.66	1831.04																													47	103.294	101.027
48	4.7	1184.34	1450.13	1512.34	2246.77	2125.08	1751.41	1308.71	1266.17	1988.83	1290.37	2154.83	1052.34	1891.29	2707.04	1294.24	2642.13	1827.13																													48	102.193	101.459
49	4.8	1183.62	1452.83	1516.53	2239.44	2126.36	1747.41	1298.66	1251.91	1980.23	1291.72	2186.17	1057.05	1887.38	2698.08	1296.01	2635.41	1825.24																													49	102.13	101.648
50	4.9		1447.3	1514.97	2233.16	2121.05	1756.96	1303.02	1253.55	1977.93	1293.93	2166.18			2695.79	1297.1	2631.36	1830.46																													50		101.261
51	5		1454.54	1519.55	2239.52	2131.9	1749.74	1304.14	1243.46	1984.54	1295.16	2155.83	1053.55	1880.58	2698.14	1281.73	2638.42	1819.95																													51		101.767
52	5.1	1178.44	1437.3	1516.85	2241.67	2129.27	1751.48	1297.94	1251.68	1976.39	1288.47	2144.23	1052.92	1894.11	2684.35	1303.41	2634.1	1837.87																													52	101.683	100.562
53	5.2																																														53
54	5.3																																														54
55	5.4	1191.4	1446.01	1515.28	2241.52	2114.67									2705.75																																55	102.801	101.171
56	5.5	1189.05	1458.24	1526.87	2251.4	2133.85	1754.98	1300.33	1257.55	1986.34	1303.55	2151.94	1037.81	1888.47		1287.89	2640.29	1831.57																													56	102.599	102.027
57	5.6	1196.85	1437.18	1524.59	2250.51	2107.15	1763.34	1305.07	1257.95	1994.12	1295.72	2149.99	1047.99	1865.83		1287.67	2635.94	1836.68																													57	103.272	100.553
58	5.7	1192.19	1452.87	1518.77	2245.68	2121.48	1757.72	1296.17	1243.21	1981.82	1298.76	2165.61	1044.43	1878.85	2709.08	1291.61	2633.35	1836.06																													58	102.87	101.651
59	5.8	1196.43		1513.42	2237.99	2126.1	1754.89	1300.59	1251.05	1981.05	1288.86	2161.15	1053.6	1879.11	2710.76	1298.57	2629.81	1832.32																													59	103.236
60	5.9	1190.25	1491.34	1517.35	2238.2	2133.59	1750.4	1308.35	1242.76	1979.6	1292.21	2170.64			2701.88	1294.4	2659.7	1832.65																													60	102.702	104.343
61	6	1194	1476.74	1532.44	2247.18	2140.39	1752.29	1310.17	1259.74	1975.61	1288.62	2152.06			2707.34	1297.35	2649.4	1841.53																													61	103.026	103.321
62	6.1	1191.26	1470.01	1537.19	2247.09	2160.38	1752.93	1316.59	1254.73	1982.79	1297.9	2153.91	1070.44	1902.99	2705.35	1288.63	2662.39	1848.57																													62	102.789	102.85
63	6.2	1183.29	1427.52	1524.62	2234.39	2146.18	1750.89	1319.32	1260.01	2002.46	1305.84	2143.81	1070.42	1913.28	2692.11	1296.01	2665.56	1848.29																													63	102.101	99.8775
64	6.3	1175.89	1462.2	1517.59	2233.28	2111.62	1754.79	1313.15	1260.09	1991.43	1307.25	2135.1	1068.93	1910.04				1852.11																													64	101.463	102.303
65	6.4	1187.02	1438.63	1510.16	2237.55	2121.23	1754.11	1300.87			1315.81		1062.37	1891.89			2647.69	1839.08																													65	102.423	100.654
66	6.5	1186.52	1446.16	1519.24	2229.47	2126.05	1747.5	1303.87	1258.27	1994.1	1299.31	2165.72			2713.03	1284.21	2647.97	1833.87																													66	102.38	101.181
67	6.6	1195.11			2232.22	2121.9	1745.04	1307.93	1261.49	1994.37	1289.41	2160.72			2693.35	1283.99	2644.83	1815.61																													67	103.122
68	6.7	1185.65	1447.3	1481.6			1746.57	1299.2	1247.43	1983.61	1298.26	2179.94	1049.26	1886.27	2697.36	1277.84																															68	102.305	101.261
69	6.8	1176.41	1448.74	1461.38		2102.74		1300.15	1244.16	1982.38	1290.31	2161.18	1064		2698.19	1288.11	2626.47																														69	101.508	101.362
70	6.9	1167.8	1433.46	1486.84	2222.05	2111.98				1982.08		2158.52	1047.78	1871.3	2696.71	1282.84		1799.37																													70	100.765	100.293
71	7	1186.31	1420.63	1495	2248.41	2109.8	1756.4				1288.85	2154.23	1046.33	1882.21	2685.62	1291.4	2617.92	1824.33																													71	102.362	99.3948
72	7.1	1155.92	1453.58	1513.34	2252.57	2115.96	1732.98	1291.66	1247.56		1282.42	2148.18	1030.93		2709.7	1297.07							Vf	755.36	951.275	978.856	1507.86	1388.79	1146.56	862.89	797.844	1338.95		1429.72	563.921	1223.15	1894.91	817.082	1802.05	1190.09							72	99.7398	101.7
73	7.2	1192.2	1435.77	1498.87	2253.22		1744.69	1289.17	1235.7	1976.84		2158.53	1042	1869.85	2686.68	1273.08	2611.53	1812.77					time	1.18914	1.36778	0.893988	1.01462	1.13495	1.04561	1.0213	1.08176	0.885925	X	1.20172	1.79025	1.21258	1.08015	1.31617	1.2153	1.07858							73	102.87	100.454
74	7.3	1172.14	1427.94	1493.42	2237.45	2112.73	1734.33	1292.72	1260.51	1968.95				1876.26		1262.51	2613.8	1829.94					Vi	1187.38	1450.47	1511.4	2239.8	2124.32	1752.99	1305.84	1253.73	1986.56	1297.38	2157.64	1055.28	1888.2	2701.27	1289.32	2643.18	1833.72							74	101.139	99.9063
75	7.4	1160.1	1431.38	1492.01	2236.3	2106.01	1718.15	1282.75	1251.59	1979.87	1279.16	2159.75	1039.71	1890.94	2690.64	1293.84		1818.52																													75	100.101	100.147
76	7.5		1422.72	1487.79	2237.25	2090.32	1730.79	1285.92	1239.01	1963.4	1283.4	2157.15						1810.9					Vf	time	Vi																						76		99.5413
77	7.6	1166.35	1429.12	1488.4	2233.48	2098.87	1728.69	1287.52	1237.26	1977.23	1275.97	2143.25	1021.93	1856.87			2610.81	1806.13				1	755.36	1.18914	1187.38																						77	100.64	99.9889
78	7.7	1174.88	1433.14	1484.07	2232.1	2092.24	1721.4	1277.79	1235.3	1960.97		2163.15	1015.97	1846.13		1296.02	2600.24	1799.94				2	951.275	1.36778	1450.47																						78	101.376	100.271
79	7.8	1182.41	1434.15	1481.74	2241.51	2083.12	1726.52	1274.13	1223.17	1961.46		2159.69	988.967	1829.35			2594.23	1797.4				3	978.856	0.893988	1511.4																						79	102.026	100.341
80	7.9	1190.81	1435.66	1477.37	2241.21	2059.98	1731.21	1270.56	1227.22	1955.78	1275.56	2171.98	998.671	1805.1	2689.56	1282.14	2592.85	1793.27				4	1507.86	1.01462	2239.8																						80	102.75	100.446
81	8	1199.11	1442.53	1468.29	2250.33	2042.96	1720.49	1261.44	1222.4	1951.04	1274.33	2175.37	1000.38	1788.99	2678.26	1281.49	2576.96	1784.97				5	1388.79	1.13495	2124.32																						81	103.467	100.927
82	8.1	1193.67	1447.24	1457.58	2247.09	2029.69	1712.48	1256.25	1206.2	1948.2	1273.61	2176.05	995.566	1774.71	2671.91	1281.7	2552.09	1783.09				6	1146.56	1.04561	1752.99																						82	102.997	101.257
83	8.2	1156.09	1442.56	1429.74	2243.17	2025.73	1680.62	1240.29	1202.16	1936.83	1264.9	2170.01	986.972	1765.78	2684.04	1273.71	2532.17	1763.4				7	862.89	1.0213	1305.84																						83	99.7547	100.929
84	8.3	1180.72	1431.53	1417.71	2243	2023.77	1680.8	1222.52	1192.27	1931.04	1262.46	2153.49	983.67	1750.97	2671.28	1287.43	2510.12	1769.57				8	797.844	1.08176	1253.73																						84	101.88	100.158
85	8.4	1154.16	1411.95	1397.45	2234.65	2008.29	1663.01	1204.58	1173.47	1914.98	1259.45	2150.34	985.616	1754.52	2668.03	1284.84	2498.95	1754.62				9	1338.95	0.885925	1986.56																						85	99.5877	98.7879
86	8.5	1126.03	1391.3	1386.46	2226.39	2001.35	1655.36	1194.34	1158.39	1897.17	1259.44		966.857	1741.55	2665.7	1277.03	2487.22	1745.41				12		X	1297.38																						86	97.1609	97.3427
87	8.6	1102.94	1371.79	1369.16	2209.33	1977.78	1635.47	1189.04	1157.77	1891.06	1230.97	2096.16	942.394	1769.3	2659.25	1285.75	2483.25	1739.96				15	1429.72	1.20172	2157.64																						87	95.1686	95.9778
88	8.7	1077.82	1341.98	1355.77	2203.96	1954.62	1630.99	1183.88	1156.61	1877.05	1212.42	2064.89	919.735	1751.63	2649.37	1284.07	2482.67	1732.79				16	563.921	1.79025	1055.28																						88	93.0013	93.8922
89	8.8	1055.49	1322.17	1345.71	2182.79	1937.53	1626.36	1192.35	1160.46	1857.98	1192.5	2027.38	953.936	1714.75	2652.64	1280.81	2474.76	1724.93				17	1223.15	1.21258	1888.2																						89	91.0738	92.5061
90	8.9	1041.34	1294.01	1331.13	2165.2	1903.18	1603.36	1185.28	1169.8	1853.03	1181.61	1988.84	941.831	1715.94	2648.78	1269.04	2472.01	1711.06				19	1894.91	1.08015	2701.27																						90	89.8535	90.5358
91	9	1018.15	1275.86	1306.7	2140.08	1878.12	1582.04	1182.08	1167.52	1840.53	1176.17	1931.51	919.148	1721.34	2653	1261.06	2445.39	1691.23				20	817.082	1.31617	1289.32																						91	87.852	89.2658
92	9.1	1001.05	1255.78	1280.01	2119.22	1853.52	1554.45	1163.69	1158.12	1833.01	1169.67	1906.93	902.021	1696.01	2641.54	1248.43	2423.02	1670.04				22	1802.05	1.2153	2643.18																						92	86.3772	87.8615
93	9.2	983.262	1231.23	1245.28	2098.92	1828.99	1528.45	1152.04	1146.98	1822.95	1166.33	1883.65	889.699	1683.53	2637.71	1246.13	2397.18	1643.63				23	1190.09	1.07858	1833.72																						93	84.8419	86.1434
94	9.3	959.011	1218.82	1229.25	2094.84	1785.03	1498.4	1133.4	1117.5	1802.5	1172.46	1860.92	875.878	1658.3	2615.47	1236.08	2366	1632.44																													94	82.7494	85.2753
95	9.4	938.671	1198.82	1208.59	2071.64	1770.24	1462.66	1114.78	1102.39	1779.89	1161.41	1826.66	859.13	1639.81	2600.05	1224.5	2327.99	1599.11																													95	80.9943	83.8759
96	9.5	899.226	1187.62	1177.16	2034.19	1744.41	1447.28	1087.39	1090.51	1757.71	1163.59	1793.42	845.591	1629.99	2567.93	1211.26	2296.7	1578.63																													96	77.5907	83.0926
97	9.6	888.386	1168.99	1160.4	1967.27	1714.51	1414.24	1074.71	1060.74	1742.87	1148.37	1755.78	828.546	1602.98	2546.97	1201.12	2268.21	1546.72																													97	76.6555	81.789
98	9.7	897.917	1150.5	1136.46	1938.1	1691.93	1383.87	1047.56	1047.7	1716.98	1147.92	1743.17	812.202	1588.26	2510.05	1174.66	2229.33	1526.65																													98	77.4778	80.4955
99	9.8	893.299	1138.93	1127.66	1909.66	1667.05	1364.9	1035.23	1025.88	1681.05	1128.84		791.199	1561.21	2408.45		2200.6	1506.6																													99	77.0793	79.6856
100	9.9	874.287	1123.76	1115.03	1879.34	1646.27	1432.48	1017.77	1005.97	1659.57	1121.8		740.737		2437.54	1146.32	2168.89	1466.86																													100	75.4389	78.6242
101	10	869.24	1110.41	1094.46	1850.56	1621.55	1329.62	1055.87	995.11	1630.9	1112.5		791.175	1520.77	2414.65	1135.8	2145.26	1455.68																													101	75.0034	77.6902
102	10.1	853.399	1103.45	1079.17	1833.16	1602.2	1319.61	984.152	973.246	1611.98	1089.59		794.746	1494.74	2370.48	1113.23	2121.93	1434.63																													102	73.6365	77.2036
103	10.2	833.416	1065.95	1055.14	1757.89	1548.46	1262.4	955.67	933.916	1546.43	1052	1605.57	766.238	1429.92	2281.42	1049.58	2051.16	1385.26																													103	71.9123	74.5795
104	10.3	823.385	1053.75	1048.72	1738.27	1536.47	1254.21	944.412	925.496	1525.28	1041.66	1594.37	752.106	1416.11	2248.46	1040.67	2032.13	1360.92																													104	71.0468	73.7263
105	10.4	823.657	1048.82	1044.16	1720.08	1525.83	1247.57	938.513	913.97	1506.39	1031.7	1578.23	745.881	1399.33	2210.09	1033.39	2012.48	1344.66																													105	71.0702	73.381
106	10.5	814.795	1032.23	1032.47	1697.63	1508.75	1238.86	932.214	905.244	1490.54	1008.67	1558.71	720.128	1379.77	2182.69	1015.84	1991.57	1338.35																													106	70.3055	72.2207
107	10.6	801.106	1035.02	1027.1	1682.58	1498.56	1228.72	929.964	897.201	1478.34	998.713	1545.95	726.303	1374.85	2161.94	1001.51	1969.5	1318.89																													107	69.1244	72.4158
108	10.7	809.632	1030.32	1021.18	1665.03	1490.45	1220.57	918.775	888.71	1457.86	988.772	1541.95	718.746	1355.25	2142.7	981.9	1959.44	1310.49																													108	69.8601	72.0871
109	10.8	803.313	1019.66	1022.42	1654.34	1482.76	1214.24	909.178	876.827	1452.89	989.355	1533.13	695.539	1349.1	2122.22	968.725	1950.4	1300.57																													109	69.3148	71.3408
110	10.9	794.235	1009.53	1022.64	1642.54	1473.28	1204.45	904.45	865.693	1444.06	979.165	1523.36	686.34	1342.14	2102.33	961.792	1941.67	1290.43																													110	68.5315	70.6322
111	11	790.756	1010.79	1008.73	1635.14	1473.81	1191.91	904.282	867.377	1427.9	962.193	1509.69	675.881	1329.67	2094.25	946.694	1926.73	1276.19																													111	68.2313	70.7203
112	11.1	789.153	998.481	1010.39	1611.75	1454.45	1187.46	897.851	854.975	1418.61	954.563	1504.86	643.727	1340.73	2065.41	949.246	1909.43	1276.43																													112	68.093	69.8592
113	11.2	793.469	992.871	1003.76	1608.8	1448.49	1184.78	896.179	853.743	1407.56	948.712	1494.2	670.952	1339.34	2050.17	932.867	1908.17	1270.77																													113	68.4654	69.4667
114	11.3	784.279	1002.14	1006.21	1591.54	1448.27	1184.6	894.984	843.933	1412.24	940.511	1494.52	661.966	1342.22	2040.93	922.84	1892.57	1261.8																													114	67.6724	70.1151
115	11.4	783.647	992.142	1001.2	1596.42	1437.65	1187.9	883.269	845.56	1400.77	939.125	1484.67	656.93	1323.26	2033.38	926.752	1880.07	1253.53																													115	67.6179	69.4157
116	11.5	782.547	994.798	996.796	1579.56	1435.2	1178.75	887.176	838.898	1383.83	941.513	1486.47	662.755	1316.5	2010.97	916.684	1877.98	1247.58																													116	67.523	69.6016
117	11.6	781.525	988.402	999.251	1579.01	1423.9	1176.3	883.976	836.823	1385.88	922.418	1482.23	655.661	1309.55	2001.33	903.178	1876.15	1239.01																													117	67.4348	69.1541
118	11.7	778.744	977.724	994.79	1566.09	1428.69	1174.83	882.229	831.526	1375.4	923.106	1466.68	657.726	1305.99	1985.99	892.616	1860.98	1244.53																													118	67.1948	68.4069
119	11.8	782.262	981.773	994.616	1562.54	1424.27	1172.73	879.729	832.576	1373.12	909.994	1467.43	641.909	1301.87	1977.29	877.981	1864.16	1229.11																													119	67.4984	68.6903
120	11.9	765.235	981.802	989.692	1556.09	1418.25	1172.38	882.584	830.964	1371.79	910.992	1478.18	632.932	1289.63	1971.46	882.606	1853.78	1233.48																													120	66.0292	68.6923
121	12	778.308	978.225	992.559	1551.44	1416.15	1166.4	879.61	832.156	1371.01	900.145	1469.85	655.619	1294.04	1961.18	884.976	1859.32	1229.47																													121	67.1572	68.442
122	12.1	773.406	975.684	985.02	1548.7	1415.99	1163.61	869.519	827.506	1361.25	895.836	1458.28	649.329	1257.35	1950.14	884.722	1843.21	1236.06																													122	66.7342	68.2642
123	12.2	774.54	973.007	987.932	1547.79	1411.83	1167.03	874.41	823.156	1365.44	890.78	1454.26	634.044	1275.45	1951.33	873.761	1847.46	1226.29																													123	66.8321	68.0769
124	12.3	767.245	971.441	991.499	1533.3	1406.79	1163.3	874.96	826.735	1369.21	889.053	1451.48	629.072	1261.71	1950.17	857.214	1837.6	1220.84																													124	66.2027	67.9674
125	12.4	775.735	974.059	985.021	1536.48	1406.68	1158.92	874.54	813.679	1354.28	885.197	1460.48	620.998	1261.8	1947.44	869.951	1842.12	1215.99																													125	66.9352	68.1505
126	12.5	770.753	972.742	983.127	1531.12	1402.23	1167.42	881.079	816.202	1357.68	887.503	1451.08	578.55	1261.59	1926.91	863.552	1840.46	1215.36																													126	66.5053	68.0584
127	12.6	775.007	969.223	984.472	1528.37	1403.78	1159.44	871.646	812.28	1357.17	884.569	1453.27	621.402	1261.46	1937.82	860.634	1828.59	1215.13																													127	66.8724	67.8122
128	12.7	768.082	972.671	986.454	1533.22	1404.61	1156.24	869.152	810.973	1356.35	881.823	1451.93	586.713	1254.68	1938.05	850.008	1831.31	1214.38																													128	66.2749	68.0534
129	12.8	763.358	969.324	987.733	1528.78	1402.99	1162.19	869.443	810.467	1349.55	879.7	1448.92	636.048	1246.34	1931.86	853.212	1837.87	1222.09																													129	65.8672	67.8192
130	12.9		971.387	987.585	1516.68	1401.01	1163.39	863.816	810.941	1349.89	882.941	1446.88	582.392	1254.6	1932.07	854.815	1831.81	1211.86																													130		67.9636
131	13	773.737	963.529	985.207	1532.02	1404.98	1151.93	872.426	810.73	1343.02	870.875	1451.61	622.231	1243.01	1924.95	849.228	1821.43	1207.83																													131	66.7628	67.4138
132	13.1	771.057	967.178	988.685	1524.67	1406.36	1158.43	869.239	810.594	1351.64	876.04	1443.76	572.184	1252.05	1920.6	848.085	1820.6	1200.84																													132	66.5316	67.6691
133	13.2	769.635	965.185	987.95	1517.92	1397.63	1158.48	870.495	812.276	1347.24	875.015	1445.08	581.309	1240.11	1912.7	857.783	1826.64	1211.93																													133	66.4089	67.5296
134	13.3	764.386	963.124	984.263	1520.78	1398.71	1150.37	861.314	807.28	1345	873.793	1445.24	576.429	1235.92	1918.33	851.966	1832.48	1201.49																													134	65.9559	67.3854
135	13.4	756.282	958.319	981.311	1516.06	1403.57	1158.04	871.757	805.918	1342.64	874.049		636.395	1221.43	1912.15	835.848	1820.98	1208.63																													135	65.2566	67.0493
136	13.5	766.169	952.656	982.024	1515.64	1401.11	1149.49	875.163	802.649	1339.32	867.76	1445.95	556.403	1227.2	1903.21	845.627	1821.2	1202.78																													136	66.1098	66.653
137	13.6	762.778	967.709	985.223	1509.7	1405.06	1147.92	865.874	801.248	1342.36	872.623	1440.14	606.303	1236.99	1914.3	842.186	1819.88	1206.61																													137	65.8172	67.7062
138	13.7	753.723	964.838	983.172	1517.92	1393.88	1159.16	862.387	808.718	1343.01	869.867	1435.32	578.392	1234.93	1908.62	849.67	1822.8	1218.01																													138	65.0359	67.5054
139	13.8	764.049	964.641	981.972	1512.58	1399.93	1160.39	866.69	809.531	1337.32	873.254	1436.08	570.502	1236.8	1907.41	832.212	1821.9	1198.33																													139	65.9268	67.4916
140	13.9	767.319	955.269	982.883	1513.64	1390.13	1151.28	872.987	807.947	1344.32	865.155	1442.9	569.564	1237.27	1917.58	830.609	1819.5	1206.84																													140	66.209	66.8359
141	14	763.494	961.858	987.604	1514.52	1400.42	1149.6	868.6	802.603	1344.58	867.988	1443.2	572.384	1226.54	1905.53	837.712	1813.22	1203.53																													141	65.8789	67.2969
142	14.1	760.214	975.796	987.298	1509.3	1402.76	1152.25	866.536	808.571	1336.94	861.271	1439.14	566.781	1229.98	1897.87	840.366	1814.7	1198.66																													142	65.596	68.2721
143	14.2	758.568	960.3		1511.18	1403.27	1153.3	865.328	801.073	1335.98	866.93	1447.15	570.745	1229.59	1902.73	845.444	1816.29	1192.69																													143	65.4539	67.1879
144	14.3	760.877	961.54	986.097		1398.34	1151.59	864.066	803.055	1341.42	862.761	1435.33	569.217	1228.7	1903.17	840.577	1819.37	1206.91																													144	65.6532	67.2747
145	14.4	758.547	960.14	991.759	1517.77	1396.12	1154.38	868.717	801.464	1337.79	863.677	1439.09	566.421	1229.4	1904.42	840.143	1801.62	1196.21																													145	65.4522	67.1767
146	14.5	761.905	962.955	987.691	1507.45	1394.36	1151.6	866.422	797.278	1345.37	857.237	1442.65	573.97	1239.53	1906.39	833.068	1812.69	1206.94																													146	65.7419	67.3736
147	14.6	758.984	964.714	987.908	1504.28	1398.25	1155.08	877.857	795.056	1337.99	860.34	1441.99	574.773	1230.96	1904.73	811.011	1809.13	1194.06																													147	65.4898	67.4967
148	14.7	762.634	965.001	982.425	1513.76	1401.01	1160.99	864.945	799.682	1337.5	862.346	1444.82	581.877	1230.08	1898.88	836.199	1812.65	1192.83																													148	65.8048	67.5168
149	14.8	756.892	960.727	982.91	1513.2	1401.07	1156.41	866.429	799.509	1342.24	867.734	1442.36	577.202	1235.35	1902.09	819.006	1805.33	1194.39																													149	65.3093	67.2178
150	14.9	762.667	966.011	981.701	1510.52	1400.41	1157.4	867.768	804.018	1341.41	856.359	1444.7	569.916	1224.82	1892.59	832.107	1801.66	1191.46																													150	65.8076	67.5874
151	15	754.855	961.563		1516.89	1397.5	1154.89	865.449	799.423	1342.5	857.209	1442.16	577.605	1231.92	1900.32	844.161	1814.26	1206.49																													151	65.1335	67.2762
152	15.1	762.993	967.978	991.773		1402.46	1150.48	873.263	802.802	1338.52	858.674	1448.93	571.819	1232.79	1910.8	824.602	1809.89	1191.13																													152	65.8357	67.725
153	15.2	764.423	961.295	982.165	1511.2	1396.95	1155.12	864.468	803.572	1337.09	854.925	1446.19	569.822	1224.44	1899.3	831.144	1817.32	1202.46																													153	65.9591	67.2575
154	15.3	759.343	967.237	983.969	1510.08	1407.76		864.026	807.358	1349.54	850.039	1441.51	575.297	1216.8	1895.38	824.199	1817.66	1199.62																													154	65.5208	67.6732
155	15.4	758.863	960.441	992.293	1519.91	1396.71	1158.13		802.033		859.671	1445.8	570.972	1214.47	1903.05	832.853	1803.98	1171.69																													155	65.4793	67.1978
156	15.5	758.89	964.993	983.117	1509.15	1393.77	1154.33	868.242	793.344	1339.53	856.26	1429.08	574.021	1227.92	1902.96	818.841	1804.61	1189.31																													156	65.4817	67.5162
157	15.6	759.089	956.866	987.215	1513.92	1396.02	1153.49	862.05	803.012	1342.8	852.99	1438.03	570.05	1228.16	1902.77	834.764	1803.59	1183.05																													157	65.4989	66.9476
158	15.7	756.543	964.917	986.99	1516.98	1401.31	1151.75	866.582	797.713	1342.74	861	1439.94	574.904	1223.13	1897.23	832.067	1812.24	1210.62																													158	65.2792	67.5109
159	15.8	759.834	960.426	993.858	1508.98	1392	1157.73	868.535	802.235	1348.68	860.148	1437.89	568.47	1223.5	1904.43	834.568	1800.33	1179.97																													159	65.5632	67.1967
160	15.9	753.05	961.428	986.101	1514.07	1399.1	1157.77	860.868	794.092	1343.04	856.858	1443.89	570.909	1223.44	1908.55	814.061	1814.51	1204.44																													160	64.9778	67.2668
161	16	760.903	960.156	990.252	1514.73	1404.19	1157.44	863.941	797.133	1340.47	863.206	1442.49	568.801	1224.75	1889.91	815.113	1817.21	1204.58																													161	65.6554	67.1778
162	16.1	765.198	961.221	991.652	1510.77	1396.84	1153.97	865.064	793.494	1335.61	854.69	1444.52	572.47	1232.44	1904.43	831.256	1811.01	1200.19																													162	66.026	67.2523
163	16.2	760.222	962.801	989.419	1510.57	1399.6	1153.66	868.605	801.846	1335.78	855.638	1441.69	573.536	1225.82	1893.12	828.168	1807.18	1200.98																													163	65.5967	67.3629
164	16.3	755.589	960.991	994.425	1517	1399.06	1153.69	858.232	790.87	1346.2	855.084	1440.88	568.829	1216.43	1896.02	826.697	1812.96	1194.21																													164	65.1969	67.2362
165	16.4	756.992	957.99	997.57	1510.86	1404.69	1156.87	860.711	794.521	1345.37	852.75	1440.67	579.751	1214.53	1901.92	807.447	1810.99	1195.66																													165	65.318	67.0262
166	16.5	767.188	961.234	992.198	1514.47	1396.07	1156.03	862.408	791.455	1344.09	861.458	1438.4	569.546	1217.34	1892.07	802.549	1809.3	1181.56																													166	66.1977	67.2532
167	16.6	761.513	962.154	994.933	1510.98	1400.97	1160.43	860.143	795.631	1346.14	845.786	1433.06	574.945	1227.02	1897.04	817.884	1808.38	1195.46																													167	65.708	67.3176
168	16.7	766.927	961.728	986.128	1511.6	1400.11	1149.83	862.885	795.064	1340.01	854.093	1440.55	572.306	1220.72	1890.26	844.879	1822.6	1194.42																													168	66.1752	67.2878
169	16.8	763.841	961.124	991.092	1514.77	1402.05	1157.83	871.114	791.317	1338.67	852.813	1436.85	567.562	1216.06	1900.23	841.809	1815.62	1194.47																													169	65.9089	67.2455
170	16.9	765.491	962.238	986.73	1514.71	1398.96	1154.76	872.019	793.063	1344.46	857.724	1437.43	572.393	1216.42	1898.83	824.816	1806.7	1190.88																													170	66.0513	67.3235
171	17	766.162	963.531	991.694	1505.75	1401.65	1159.74	866.59	797.502	1342.34	850.934	1439.63	579.755	1215.08	1897.49	841.07	1805.95	1186.82																													171	66.1091	67.4139
172	17.1	767.606	957.649	987.533	1511.11	1402.81	1151.73	865.711	790.844	1336.83	857.826	1438.65	570.817	1214.4	1902.81	808.093	1794.29	1172.31																													172	66.2338	67.0024
173	17.2	769.483	966.273	991.973	1509.03	1400.51	1160.04	860.114	793.024	1336.93	858.887	1438.79	566.746	1210.08	1902.4	825.168	1792.86	1178.97																													173	66.3957	67.6058
174	17.3	762.644	962.84	992.018	1508.13	1403.52	1151.31	863.535	798.713	1345.81	858.811	1442.49	571.259	1205.26	1900.96	802.703	1810.78	1195.74																													174	65.8056	67.3656
175	17.4	759.712	956.15	986.38	1513.38	1404.88	1160.55	866.389	794.79	1344.24	853.569	1432.69	570.106	1217.65	1897.64	830.741	1813.07	1205.8																													175	65.5527	66.8975
176	17.5	760.351	952.244	994.272	1515.25	1395.55	1157.34	859.375	794.716	1341.77	863.52	1432.78	576.414	1215.78	1891.01	822.576	1809.49	1195.32																													176	65.6078	66.6243
177	17.6	758.985	969.249	1004.88	1511.41	1398.73	1158.99	864.435	793.085	1342.77	858.321	1443.89	569.277	1203.1	1901.34	835.598	1807.88	1186.01																													177	65.4899	67.814
178	17.7	756.551	967.209	990.665	1509.03	1396.27	1159.33	866.128	803.174	1342.91	851.001	1437.31		1216.99	1893	810.284	1778.47	1154.79																													178	65.2799	67.6713
179	17.8	764.038	965.654	993.437	1510.14	1395.55	1157.49	871.772	792.326	1340.78	846.148	1437.1	573.955	1225.39	1903.99	807.625	1812.82	1192.23																													179	65.9259	67.5624
180	17.9	758.946	962.841	991.636	1512.78	1403.1	1161.8	859.82	791.723	1339.82	851.867	1442.77	573.142	1220.1	1905.21	799.202	1798.46	1193.21																													180	65.4866	67.3657
181	18	763.786	961.928	988.762	1518.69	1403.67	1152.27	867.111	788.345	1335.67	854.038	1439.67	568.759	1211.09	1902.32	808.435	1807.95	1199.64																													181	65.9042	67.3018
182	18.1	764.855	955.954	991.986	1515.53	1400.14	1152.74	871.008	798.021	1339.67	841.823	1439.65	576.347	1209.92	1903.05	813.564	1814.13	1191.99																													182	65.9964	66.8838
183	18.2	761.997	957.704	993.444	1515.97	1406.04	1156.08	868.264	799.805	1343.79	857.975	1441.24	572.818	1212.15	1897.67	805.674	1787.25	1171.24																													183	65.7498	67.0062
184	18.3	754.859	957.383	988.48	1511.88	1404.64	1158.92	874.196	794.654	1344.51	858.696	1442.68	570.819	1219.97	1903.97	803.636	1791.29	1173.06																													184	65.1339	66.9838
185	18.4	761.204	963.748	989.957	1511.53	1410.53	1158.82	859.468	785.696	1340.09	845.002	1447.39	570.47	1208.33	1899.99	812.718	1790.48	1176.91																													185	65.6814	67.4291
186	18.5	762.045	961.666	994.505	1514.55	1404.7	1149.01	874.173	793.12	1347.67	848.634	1449.39	573.422	1210.32	1896.12	815.253	1773.26	1153.48																													186	65.7539	67.2834
187	18.6	763.162	968.448	990.662	1513.34	1412.18	1162.79	872.565	792.708	1340.74	857.379	1435.45	571.99	1203.08	1898.14	794.8	1807.14	1197.55																													187	65.8503	67.758
188	18.7	761.634	969.127	992.198	1514.84	1402.65	1159.65	868.47	787.549	1339.67	848.103	1436.94	569.183	1220.15	1900.31	813.994	1818.38	1214.26																													188	65.7185	67.8054
189	18.8	760.059	966.419	990.921	1512.16	1400.91	1156.36	862.682	790.651	1340.89	861.873	1433.49	571.543	1214.71	1896.86	817.332	1806.86	1188.12																													189	65.5826	67.616
190	18.9	759.688	962.841	997.701	1512.2	1407.47	1154.68	871.619	802.108	1349.08	845.467	1440.46	578.119	1218.14	1896.52	799.693	1793.08	1168.03																													190	65.5506	67.3656
191	19	767.697	962.302	986.467	1520.44	1407.28	1156.54	854.968	788.854	1343.08	855.236	1437.42	569.996	1216.8	1910.73	803.197	1808.74	1197.04																													191	66.2416	67.3279
192	19.1	760.627	956.58	992.513	1519.56	1410.13	1162.92	869.015	785.073	1339.42	847.162	1441.07	580.198	1214.98	1906.16	807.916	1814.94	1194.15																													192	65.6316	66.9276
193	19.2	758.186	959.576	994.135	1514.26	1401.61	1155.32	864.665	770.973	1340.68	843.341	1439.42	577.472	1199.58	1903.53	804.418	1784.26	1163.09																													193	65.421	67.1372
194	19.3	762.62	966.201	998.248	1516.64	1406.5	1157.77	869.667	788.345	1334.73	851.386	1442.39	568.008	1223.03	1903.01	813.075	1809.59	1199.45																													194	65.8036	67.6007
195	19.4	759.89	962.123	997.774	1513.86	1410.22	1163.26	867.019	793.508	1344.02	856.781	1431.51	572.966	1215.84	1899.35	794.285	1809.5	1194.97																													195	65.568	67.3154
196	19.5	762.913	967.435	1000.9	1517.21	1411.54	1157.3	859.93	792.987	1341.15	846.914	1436.95	572.539	1204.15	1894.86	825.956	1789.91	1170.96																													196	65.8289	67.6871
197	19.6	770.647	965.95	1001.49	1523.08	1407.78	1158.39	863.984	800.37	1342.36	845.513	1441.67	566.562	1204.17	1902.21	801.713	1813.07	1188.42																													197	66.4962	67.5831
198	19.7	769.692	957.587	998.98	1515.97	1411.11	1168.6	867.841	790.282	1347.33	840.765	1442.19	573.028	1224.53	1902.49	811.093	1792.33	1171.11																													198	66.4138	66.998
199	19.8	757.858	965.73	997.831	1517.79	1409.58	1160.01	873.74	799.922	1350.2	859.574	1444.14	571.494	1214.01	1893.3	807.841	1803.75	1192.17																													199	65.3926	67.5678
200	19.9	763.181	962.445	1002.85	1513.6	1407.98	1163.92	873.82	788.535	1343.47	845.264	1443.95	579.996	1219.52	1903.3	801.041	1804.61	1184.46																													200	65.852	67.338
201	20	759.403	961.624	995.603	1516.41	1411.21	1161	861.636	802.414	1342.22	837.22	1442.63	570.506	1215.47	1897.71																																201	65.526	67.2805
202	20.1	759.46	965.505	997.991	1517.94	1405.41	1160.92	867.284	798.888	1348.35		1442.47	571.416	1221.31	1904.96																																202	65.5309	67.552
203	20.2	768.256	962.912	994.46	1515.65	1412.75	1163.77	872.947	793.804	1340.48		1445.65	575.257	1215.65	1892.17																																203	66.2899	67.3706
204	20.3	764.243	959.146	994.658	1517.37	1411.83	1160.71	874.515	788.089	1344.77		1434.92	574.777	1225.84	1903.11																																204	65.9436	67.1071
205	20.4	760.531	963.969	992.988	1512.93	1411.72	1159.16	869.409	779.81	1344.38		1439.66	573.507	1203.36	1894.09																																205	65.6233	67.4446
206	20.5	767.238	959.469	1000.26	1512.22	1411.98	1164.4	871.745	789.992	1351.3		1441.5	572.543	1206.52	1901.44																																206	66.202	67.1297
207	20.6	763.766	968.687	995.905	1520.27	1410.77	1158.06	865.946	789.331	1345.64		1443.1	569.372	1205.81	1897.02																																207	65.9025	67.7747
208	20.7	756.799	958.606	994.753	1518.12	1409.65	1155.14	865.028	790.974	1345.75		1441.29	573.15	1217.68	1894.98																																208	65.3013	67.0694
209	20.8	762.916	963.265	997.6	1521.28	1417.31	1157.52	860.443	791.782	1338.54		1443.56	570.058	1204.83	1898.8																																209	65.8291	67.3953
210	20.9	770.171	963.719	996.328	1520.73	1411.75	1154.24	866.397	780.365	1345.94		1429.55	571.159	1219.29	1902.29																																210	66.4551	67.4271
211	21	766.048	954.723	995.953	1518.01	1410.93	1154.82	868.129	780.638	1351.88		1443.74	573.883	1207.93	1910.32																																211	66.0993	66.7976
212	21.1	766.138	964.097	1005.43	1525.69	1419.65	1156.67	858.831	783.03	1345.05		1434.3	571.021	1200.73	1895.88																																212	66.1071	67.4535
213	21.2	770.09	963.335	1001.65	1524.48	1421.82	1158.16	863.962	782.002	1344.03		1433.25	573.727	1222.42	1903.69																																213	66.4481	67.4002
214	21.3	765.009	970.102	1000.16	1520.46	1409.95	1160.87	869.959	787.376	1346.59		1429.85	572.324	1215.2	1893.14																																214	66.0097	67.8737
215	21.4	763.946	963.388	996.816	1511.69	1411.71	1163.38	869.917	791.485	1347.28		1439.14	567.214	1200.43	1902.68																																215	65.918	67.4039
216	21.5	762.442	959.102	998.249	1526.21	1416.58	1158.83	857.979	795.571	1346.01		1434.12	575.659	1214.96	1892.57																																216	65.7882	67.1041
217	21.6	763.067	966.587	1001.87	1516.47	1406.78	1164.68	867.437	778.6	1346.22		1442.44	575.133	1202.96	1908.63																																217	65.8421	67.6277
218	21.7	764.322	959.648	1000.13	1514.11	1414.97	1164.51	862.493	788.57	1347.12		1439.09	570.677	1193.91	1902.08																																218	65.9504	67.1423
219	21.8	767.865	963.971	1000.07	1520.54	1413.61	1168.16	871.196	774.66	1344.79		1440.46	571.205	1198.29	1895.79																																219	66.2562	67.4447
220	21.9	768.432	959.553	1002.69	1518.86	1416.43	1160.76	868.191	792.595	1346.19		1437.81	567.308	1204.56	1878.38																																220	66.3051	67.1356
221	22	765.566	963.762	1001.65	1523.53	1410.07	1164.23	870.759	780.713	1354.98		1434.78	579.204	1197.48	1899.71																																221	66.0577	67.4301
222	22.1	770.374	967.84	997.921	1524.66	1414.73	1161.12	866.012	773.589	1342.28		1435.51	570.444	1201.79	1903.3																																222	66.4726	67.7154
223	22.2	764.111	957.753	1003.05	1519.62	1419.42	1156.45	865.709	776.366	1344.61		1441.87	576.307	1201.15	1902.84																																223	65.9322	67.0097
224	22.3	768.973	964.465	1006.13	1514.94	1411.89	1167.31	865.439	776.78	1352.03		1440.82	572.179	1193.83	1898.88																																224	66.3517	67.4793
225	22.4	772.755	961.564	1000.67	1518.18	1413.66	1163.99	864.386	781.916	1344.72		1440.97	573.375	1204.33	1898.54																																225	66.678	67.2763
226	22.5	761.474	961.961	992.447	1522.4	1407.75	1165.06	870.709	778.774	1348.66		1439.24	568.342	1192.29	1887.49																																226	65.7047	67.3041
227	22.6	766.795	970.585	1007.53	1520.18	1411.79	1160.25	864.83	772.645	1348.49		1437.83	575.878	1203.21	1891.28																																227	66.1638	67.9074
228	22.7	766.339	961.245	1002.48	1522.17	1411.94	1161.57	865.076	776.155	1349.47		1434.83	570.026	1196.26	1898.37																																228	66.1244	67.254
229	22.8	763.356	966.115	1001.64	1524.92	1411.03	1161.24	866.029	754.707	1345.64		1444.13	572.644	1200.16	1876.7																																229	65.8671	67.5947
230	22.9	766.689	968.189	1004.36	1523.13	1423.41	1167.77	858.353	769.248	1348.41		1438.24	577.666	1195.96	1899.63																																230	66.1546	67.7398
231	23	772.587	967.196	1000.16	1520.28	1414.74	1163.04	871.934	778.078	1346.26		1437.49	567.91	1204.95	1907.34																																231	66.6635	67.6703
232	23.1	769.008	964.204	998.808	1521.41	1416.46	1163.87	872.094	780.508	1347.36		1436.19	571.656	1203.23	1893.86																																232	66.3548	67.461
233	23.2	759.853	965.217	1004.39	1523.29	1422.66	1161.26	859.545	770.185	1345.19		1442.19	582.96	1220.72	1888.7																																233	65.5648	67.5319
234	23.3	768.357	968.8	1002.41	1521.12	1412.49	1170.52	869.603	755.248	1353.61		1444.65	572.604	1200.86	1890.92																																234	66.2985	67.7826
235	23.4	767.85	966.77	998.905	1524.32	1415.31	1158.65	863.574	790.019	1345.59		1438.97	577.408	1197.67	1887.55																																235	66.2548	67.6406
236	23.5	766.027	966.657	1003.05	1521.12	1432.58	1167.4	862.595	767.764	1356.95		1441.5	574.136	1197.78	1898.17																																236	66.0976	67.6326
237	23.6	772.839	960.407	1003.12	1523.5	1422.58	1162.93	860.637	784.677	1351.59		1440.98	576.655	1215.37	1902.04																																237	66.6854	67.1954
238	23.7	774.684	958.395	1003.69	1522.92	1427.79	1158.24	864.947	765.223	1344.16		1441.44	572.087	1186.17	1898.86																																238	66.8445	67.0546
239	23.8	766.762	964.984	999.266	1522.56	1419.85	1160.09	865.775	759.226	1348.18		1439.29	576.05	1192.67	1890.47																																239	66.161	67.5156
240	23.9	765.001	964.472	1007.84	1516.58	1414.93	1167.3	873.046	759.572	1356.07		1441.31	567.284	1190.48	1885.71																																240	66.009	67.4797
241	24	768.522	970.267	1007.74	1524.68	1419.51	1160.88	862.866	758.367	1355.15		1438.06	565.243	1184.69	1888.26																																241	66.3128	67.8852
242	24.1	762.934	960.324	1006.31	1524.29	1424.97	1167.11	861.752	774.182	1349.66		1434.8	572.024	1192.65	1886.14																																242	65.8306	67.1895
243	24.2	769.942	965.415	1006.02	1518.71	1419.91	1170.33	868.031	789.862	1346.18		1438.74	579.673	1195.6	1892.71																																243	66.4353	67.5457
244	24.3	771.088	967.494	1003.5	1516.89	1422.59	1159.66	868.514	760.684	1349.14		1428.55	572.711	1187.29	1885.08																																244	66.5342	67.6912
245	24.4	767.249	969.055	1002.05	1527.29	1423.04	1165.89	873.442		1353.94		1432.96	570.734	1200.25	1904.89																																245	66.203	67.8004
246	24.5	772.58	961.312	1007.13	1525.22	1422.56	1170.72	863.904	765.463	1369.23		1439.82	573.815	1204.78	1899.33																																246	66.663	67.2587
247	24.6	767.473	968.713	1009.44	1525.65	1422.18	1172.43	870.8	741.193	1349.85		1444.55	577.34	1209.99	1891.48																																247	66.2223	67.7765
248	24.7	767.904	966.248	1007.81	1524.84	1426.2	1166.3	862.379	766.16	1347.58		1437.3	577.516	1179.82	1897.02																																248	66.2595	67.6041
249	24.8	772.57	971.338	1008.08	1527.47	1426.27	1173.17	862.16	768.665	1351.22		1441.62	572.468	1182.38	1895.94																																249	66.6621	67.9601
250	24.9	765.629	969.258	1007.74	1522.32	1428.97	1166.6	856.29	762.99	1350.95		1439.05	577.01	1188.22	1894.65																																250	66.0632	67.8146
251	25	767.746	966.03	1003.13	1525.7	1425.62	1169.35	868.365	771.294	1342.93		1434.96	578.895	1189.2	1891.26																																251	66.2459	67.5888
252	25.1	768.482	967.481	1006.42	1529.29	1421.44	1173.65	871.237		1354.86		1443.76	574.896	1190.84	1895.64																																252	66.3094	67.6903
253	25.2	773.918	967.893	1013.48	1524.32	1425.87	1164.46	867.674		1346.84		1441.17	568.661	1189.2	1903.14																																253	66.7784	67.7191
254	25.3	772.221	971.054	1011.06	1530.39	1426.51	1164.27	863.961		1350.35		1439.21	573.173	1191.44	1888.32																																254	66.6319	67.9403
255	25.4	778.204	972.62	1008.88	1528.07	1430.56	1169.25	868.525		1357.46		1447.49	565.416	1190.82	1887.78																																255	67.1482	68.0498
256	25.5	775.058	975.299	1010.81	1528.26	1425.78	1173.96	863.359		1355.35		1441.43	574.399	1183.99	1899.62																																256	66.8768	68.2372
257	25.6	771.804	970.002	1012.91	1530.52	1422.38	1170.77	873.239		1358.12		1435.8	570.549	1188.55	1899.21																																257	66.596	67.8667
258	25.7	771.845	970.335	1010.36	1524.76	1431.35	1162.44	860.391		1350.39		1437.99	574.381	1194.5	1868.84																																258	66.5996	67.8899
259	25.8	773.845	975.104	1004.82	1525.66	1432.54	1169.95	866.672		1347.75		1439.78	573.265	1191.52	1892.9																																259	66.7721	68.2236
260	25.9	766.358	966.7	1017.21	1530.34	1432.68	1172.46	867.144		1355.49		1433.48	569.922	1190.64	1875.94																																260	66.1261	67.6356
261	26	776.702	972.203	1008.71	1534.61	1428.56	1170.72	869.757		1359.82		1439.34	574.34	1197.29	1890.69																																261	67.0186	68.0207
262	26.1	772.918	968.088	1009.19	1533.23	1425.32	1167.52	865.781		1367.3		1442.93	579.265	1209.18	1893.08																																262	66.6922	67.7327
263	26.2	771.109	969.03	1016.55	1529.07	1429.88	1173.69	862.43		1358.89		1438.84	581.383	1194.19	1866.91																																263	66.536	67.7987
264	26.3	771.581	968.098	1010.19	1532.12	1425.68	1166.79	877.937		1356.14		1442.54	574.945	1188.43	1892.75																																264	66.5768	67.7334
265	26.4	774.058	973.308	1008.75	1530.57	1431	1168.1	870.775		1358.11		1442.15	576.725	1193.59	1904.78																																265	66.7905	68.098
266	26.5	777.409	968.937	1014.68	1532.08	1432.92	1182.68	860.668		1368.79		1439.14	577.988	1225.3	1890.43																																266	67.0797	67.7921
267	26.6	770.851	974.733	1010.35	1532.01	1428.97	1168.15	867.153		1360.94		1438.29	575.987	1185.31	1891.22																																267	66.5138	68.1977
268	26.7	775.711	976.166	1014.4	1534.14	1438.32	1175.82	867.676		1368		1437.05	578.281	1201.7	1902.46																																268	66.9331	68.2979
269	26.8	773.347	972.351	1017.06	1529.3	1427.39	1175.17	875.634		1358.93		1436.41	575.789	1188.36	1878.61																																269	66.7291	68.031
270	26.9	773.528	973.655	1008.89	1531.33	1433.51	1171.56	876.414		1357.66		1442.1	576.707	1173.77	1886.92																																270	66.7448	68.1222
271	27	773.863	968.888	1011.92	1535.01	1432.94	1173.82	869.275		1354.82		1435.58	576.561	1184.58	1898.43																																271	66.7737	67.7887
272	27.1	774.413	972.017	1015.47	1536.32	1443.01	1177.06	863.832		1353.3		1445.96	579.79	1205.12	1870.63																																272	66.8211	68.0076
273	27.2	770.044	977.459	1021.29	1537.57	1429.82	1173.12	856.022		1363.23		1444.59	580.092	1185.88	1896.35																																273	66.4442	68.3884
274	27.3	772.159	967.91	1014.81	1533.76	1444.88	1180.11	871.889		1354.97		1437.79	578.294	1182.9	1878.34																																274	66.6266	67.7203
275	27.4	774.947	974.101	1017.33	1531.9	1437.43	1173.68	869.361		1373.39		1435.17	579.72	1183.98	1871.68																																275	66.8672	68.1535
276	27.5	769.787	971.673	1018.31	1531.39	1444.51	1175.88	858.553		1355.41		1450.86	572.614	1180.29	1898.87																																276	66.422	67.9836
277	27.6	769.317	974.976	1012.43	1536.35	1439.57	1176.8	872.327		1362.71		1445.95	582.849	1188.97	1886.38																																277	66.3815	68.2147
278	27.7	778.52	972.624	1015.14	1535.01	1444.57	1173.28	872.399		1355.27		1438.03	578.607	1186.29	1881.38																																278	67.1755	68.0501
279	27.8	771.252	976.847	1015.82	1533.56	1431.27	1175.88	864.418		1359.42		1440.39	583.353	1187.55	1881.61																																279	66.5484	68.3456
280	27.9	769.949	977.906	1017.89	1532.41	1439.76	1177.32	862.806		1367.82		1441.46	580.844	1195.14	1871.13																																280	66.436	68.4197
281	28	773.29	978.032	1015.08	1535.26	1432.95	1178.22	857.714		1365.86		1443.48	579.615	1174.55	1892.97																																281	66.7242	68.4285
282	28.1	771.608	969.033	1015.66	1533.86	1438.19	1178.55	869.155		1366.18		1447.6	576.023	1186.85	1876.18																																282	66.5791	67.7989
283	28.2	770.551	969.921	1015.68	1534.72	1447.6	1170.82	855.135		1366.33		1444.01	580.696	1192.94	1889.41																																283	66.4879	67.861
284	28.3	779.033	969.261	1021.82	1538.15	1440.22	1175.62	866.342		1361.01		1439.69	578.502	1184.54	1883.36																																284	67.2198	67.8148
285	28.4	775.171	969.452	1016.77	1540.01	1442.46	1169.32	855.071		1365.3		1447.38	572.922	1171.43	1885.88																																285	66.8865	67.8282
286	28.5	774.496	980.206	1017.98	1537.56	1437.2	1180.01	866.614		1363.85		1441.76	574.473	1176.56	1877.59																																286	66.8283	68.5806
287	28.6	774.423	977.188	1014.19	1533.57	1435.14	1178.18	859.387		1364		1440.07	577.404	1187.14	1882.41																																287	66.822	68.3694
288	28.7	772.064	972.625	1017.86	1536.39	1450.01	1176.82	870.596		1366.2		1445.59	576.011	1164.91	1902.25																																288	66.6184	68.0502
289	28.8	771.001	974.245	1017.23	1538.96	1441.05	1175.87	829.073		1365.26		1446.18	577.255	1183.75	1890.45																																289	66.5267	68.1636
290	28.9	778.466	969.245	1022.48	1536.93	1441.84	1175.25	858.745		1361.79		1447.89	569.582	1157.57	1891.01																																290	67.1708	67.8137
291	29	780.807	969.947	1021.6	1536.38	1440.73	1176.25	863.005		1364.87		1444.01	573.832	1180.82	1896.19																																291	67.3729	67.8628
292	29.1	780.589	969.693	1025.12	1538.16	1442.03	1190.27	845.575		1364.33		1440.44	577.782	1184	1878.31																																292	67.354	67.845
293	29.2	774.786	975.898	1020.47	1539.76	1441.24	1180.83	871.969		1359.03		1451.45	585.917	1170.66	1881.99																																293	66.8533	68.2792
294	29.3	780.285	972.636	1013.37	1543.45	1439.93	1179.56	851.242		1366.38		1444.17	582.381	1176.81	1882.91																																294	67.3278	68.051
295	29.4	777.514	969.936	1018.35	1537.79	1438.79	1185.48	858.606		1362.81		1440.01	572.648	1179.92	1877.7																																295	67.0887	67.862
296	29.5	779.606	968.984	1021.94	1537.21	1448.62	1185.58	876.308		1369.01		1449.52	575.956	1194.28	1891.98																																296	67.2692	67.7954
297	29.6	777.45	975.944	1020.07	1539.66	1441.73	1177.91	857.105		1362.01		1438.95	584.21	1175.9	1874.4																																297	67.0831	68.2824
298	29.7	776.453	974.054	1022.48	1545.93	1445.88	1174.73	853.874		1362.11		1440.42	580.659	1173.36	1883.99																																298	66.9972	68.1502
299	29.8	775.456	977.165	1021.63	1547.19	1446.35	1181.27	856.302		1372.41		1437.23	580.133	1186.32	1878.88																																299	66.9111	68.3678
300	29.9	773.661	972.144	1019.91	1533.31	1438.82	1183.63	856.186		1364.01		1442.4	574.264	1165.3	1870.32																																300	66.7562	68.0166
	Vf	755.36	951.275	978.856	1507.86	1388.79	1146.56	862.89	797.844	1338.95		1429.72	563.921	1223.15	1894.91	817.082	1802.05	1190.09
	time	1.18914	1.36778	0.893988	1.01462	1.13495	1.04561	1.0213	1.08176	0.885925	X	1.20172	1.79025	1.21258	1.08015	1.31617	1.2153	1.07858
	Vi	1187.38	1450.47	1511.4	2239.8	2124.32	1752.99	1305.84	1253.73	1986.56	1297.38	2157.64	1055.28	1888.2	2701.27	1289.32	2643.18	1833.72
[truncated: 17 more columns]
