# Supplementary material for: A mechano-osmotic feedback couples cell volume to the rate of cell deformation
Source: eLife journal article supplement (doi:10.7554/elife.72381), 2022-04-13
Supplement: supp [file 0.78.xlsx]

## Sheet: Sheet1
ID	lineage	Frame	Cell_Intensisty
p2_1_100.tif	1	1	1261.04
p2_1_100.tif	1	2	1255.32
p2_1_100.tif	1	3	1256.39
p2_1_100.tif	1	4	1258.64
p2_1_100.tif	1	5	1252.66
p2_1_100.tif	1	6	1262.03
p2_1_100.tif	1	7	1254.09
p2_1_100.tif	1	8	1255.68
p2_1_100.tif	1	9	1261.8
p2_1_100.tif	1	10	1256.68
p2_1_100.tif	1	11	1259.4
p2_1_100.tif	1	12	1262.59
p2_1_100.tif	1	13	1261.21
p2_1_100.tif	1	14	1263.39
p2_1_100.tif	1	15	1256.98
p2_1_100.tif	1	16	1261.37
p2_1_100.tif	1	17	1260.65
p2_1_100.tif	1	18	1256.7
p2_1_100.tif	1	19	1264.21
p2_1_100.tif	1	20	1266.23
p2_1_100.tif	1	21	1270.44
p2_1_100.tif	1	22	1272.8
p2_1_100.tif	1	23	989.976
p2_1_100.tif	1	24	1283.12
p2_1_100.tif	1	25	1268.64
p2_1_100.tif	1	26	1258.2
p2_1_100.tif	1	27	1261.99
p2_1_100.tif	1	28	1259.96
p2_1_100.tif	1	29	1263.43
p2_1_100.tif	1	30	1255.72
p2_1_100.tif	1	31	1262.15
p2_1_100.tif	1	32	1258.91
p2_1_100.tif	1	33	1264.28
p2_1_100.tif	1	34	1211.03
p2_1_100.tif	1	35	968.076
p2_1_100.tif	1	36	1271.17
p2_1_100.tif	1	37	1245.26
p2_1_100.tif	1	38	1263.95
p2_1_100.tif	1	39	1267.49
p2_1_100.tif	1	40	1265.01
p2_1_100.tif	1	41	1263.5
p2_1_100.tif	1	42	1272.24
p2_1_100.tif	1	43	1269.29
p2_1_100.tif	1	44	1274.04
p2_1_100.tif	1	45	1267.15
p2_1_100.tif	1	46	1269.26
p2_1_100.tif	1	47	1273.44
p2_1_100.tif	1	48	1264.71
p2_1_100.tif	1	49	1276.19
p2_1_100.tif	1	50	1270.95
p2_1_100.tif	1	51	1266.45
p2_1_100.tif	1	52	1269.48
p2_1_100.tif	1	53	1271.43
p2_1_100.tif	1	54	1275.17
p2_1_100.tif	1	55	1293.94
p2_1_100.tif	1	56	589.307
p2_1_100.tif	1	57	1066.38
p2_1_100.tif	1	58	1287.85
p2_1_100.tif	1	59	1277.91
p2_1_100.tif	1	60	1261.02
p2_1_100.tif	1	61	1261.47
p2_1_100.tif	1	62	1261.25
p2_1_100.tif	1	63	1249.99
p2_1_100.tif	1	64	1264.69
p2_1_100.tif	1	65	1262.68
p2_1_100.tif	1	66	1264.73
p2_1_100.tif	1	67	1257.5
p2_1_100.tif	1	68	1269.77
p2_1_100.tif	1	69	1263.88
p2_1_100.tif	1	70	1271.17
p2_1_100.tif	1	71	1266.88
p2_1_100.tif	1	72	1265.42
p2_1_100.tif	1	73	1267.27
p2_1_100.tif	1	74	1268.73
p2_1_100.tif	1	75	1272.23
p2_1_100.tif	1	76	1267.54
p2_1_100.tif	1	77	1265.33
p2_1_100.tif	1	78	1271.07
p2_1_100.tif	1	79	1268.48
p2_1_100.tif	1	80	1266.61
p2_1_100.tif	1	81	1272.45
p2_1_100.tif	1	82	1271.88
p2_1_100.tif	1	83	1255.06
p2_1_100.tif	1	84	1266.86
p2_1_100.tif	1	85	1268.5
p2_1_100.tif	1	86	1264.51
p2_1_100.tif	1	87	1269.27
p2_1_100.tif	1	88	1268.89
p2_1_100.tif	1	89	1269.69
p2_1_100.tif	1	90	1269.33
p2_1_100.tif	1	91	1271.1
p2_1_100.tif	1	92	1269.69
p2_1_100.tif	1	93	1269.14
p2_1_100.tif	1	94	1275.85
p2_1_100.tif	1	95	1260.47
p2_1_100.tif	1	96	1238.73
p2_1_100.tif	1	97	1270.09
p2_1_100.tif	1	98	1268.83
p2_1_100.tif	1	99	1267.04
p2_1_100.tif	1	100	1268.43
p2_101_200.tif	1	101	1264.72
p2_101_200.tif	1	102	1261.75
p2_101_200.tif	1	103	1260.66
p2_101_200.tif	1	104	1259.84
p2_101_200.tif	1	105	1260.56
p2_101_200.tif	1	106	1260.4
p2_101_200.tif	1	107	1261.49
p2_101_200.tif	1	108	1263.97
p2_101_200.tif	1	109	1266.36
p2_101_200.tif	1	110	1259.17
p2_101_200.tif	1	111	1266.15
p2_101_200.tif	1	112	1268.5
p2_101_200.tif	1	113	1269.48
p2_101_200.tif	1	114	1262.36
p2_101_200.tif	1	115	1264.01
p2_101_200.tif	1	116	1265.07
p2_101_200.tif	1	117	1256.5
p2_101_200.tif	1	118	1260.73
p2_101_200.tif	1	119	1260.71
p2_101_200.tif	1	120	1260.06
p2_101_200.tif	1	121	1271.22
p2_101_200.tif	1	122	1263.66
p2_101_200.tif	1	123	1263.11
p2_101_200.tif	1	124	1264.23
p2_101_200.tif	1	125	1265.26
p2_101_200.tif	1	126	1261.5
p2_101_200.tif	1	127	1262.77
p2_101_200.tif	1	128	1265.38
p2_101_200.tif	1	129	1267.03
p2_101_200.tif	1	130	1260.55
p2_101_200.tif	1	131	1263.38
p2_101_200.tif	1	132	1262.27
p2_101_200.tif	1	133	1260.78
p2_101_200.tif	1	134	1261.84
p2_101_200.tif	1	135	1256.95
p2_101_200.tif	1	136	1260.59
p2_101_200.tif	1	137	1273.38
p2_101_200.tif	1	138	1269.26
p2_101_200.tif	1	139	1261.89
p2_101_200.tif	1	140	1262.26
p2_101_200.tif	1	141	1266.95
p2_101_200.tif	1	142	1268.76
p2_101_200.tif	1	143	1264.15
p2_101_200.tif	1	144	1263.4
p2_101_200.tif	1	145	1262.59
p2_101_200.tif	1	146	1259.27
p2_101_200.tif	1	147	1263.51
p2_101_200.tif	1	148	1255.53
p2_101_200.tif	1	149	1257.16
p2_101_200.tif	1	150	1258.4
p2_101_200.tif	1	151	1258.59
p2_101_200.tif	1	152	1258.54
p2_101_200.tif	1	153	1261.08
p2_101_200.tif	1	154	1258.48
p2_101_200.tif	1	155	1259.79
p2_101_200.tif	1	156	1264.09
p2_101_200.tif	1	157	1256.37
p2_101_200.tif	1	158	1254.19
p2_101_200.tif	1	159	1253.55
p2_101_200.tif	1	160	1255.49
p2_101_200.tif	1	161	1251.75
p2_101_200.tif	1	162	1256.78
p2_101_200.tif	1	163	1252.06
p2_101_200.tif	1	164	1253.58
p2_101_200.tif	1	165	1248.65
p2_101_200.tif	1	166	1248.42
p2_101_200.tif	1	167	1247.89
p2_101_200.tif	1	168	1251.69
p2_101_200.tif	1	169	1247.52
p2_101_200.tif	1	170	1246.51
p2_101_200.tif	1	171	1240.48
p2_101_200.tif	1	172	1240.48
p2_101_200.tif	1	173	1234.43
p2_101_200.tif	1	174	1239.88
p2_101_200.tif	1	175	1239.47
p2_101_200.tif	1	176	1238.95
p2_101_200.tif	1	177	1239.47
p2_101_200.tif	1	178	1236.97
p2_101_200.tif	1	179	1228.8
p2_101_200.tif	1	180	1236.31
p2_101_200.tif	1	181	1225.33
p2_101_200.tif	1	182	1227.64
p2_101_200.tif	1	183	1227.59
p2_101_200.tif	1	184	1234.52
p2_101_200.tif	1	185	1229
p2_101_200.tif	1	186	1228.81
p2_101_200.tif	1	187	1226.7
p2_101_200.tif	1	188	1221.49
p2_101_200.tif	1	189	1220.04
p2_101_200.tif	1	190	1220.52
p2_101_200.tif	1	191	1212.86
p2_101_200.tif	1	192	1212.12
p2_101_200.tif	1	193	1216.76
p2_101_200.tif	1	194	1212.27
p2_101_200.tif	1	195	1214.45
p2_101_200.tif	1	196	1213.19
p2_101_200.tif	1	197	1209.59
p2_101_200.tif	1	198	1204.79
p2_101_200.tif	1	199	1209.39
p2_101_200.tif	1	200	1209.45
p2_201_306.tif	1	201	1209.84
p2_201_306.tif	1	202	1204.38
p2_201_306.tif	1	203	1194.75
p2_201_306.tif	1	204	1196.9
p2_201_306.tif	1	205	1202.78
p2_201_306.tif	1	206	1198.44
p2_201_306.tif	1	207	1194.89
p2_201_306.tif	1	208	1196.31
p2_201_306.tif	1	209	1198.16
p2_201_306.tif	1	210	1202.08
p2_201_306.tif	1	211	1201.03
p2_201_306.tif	1	212	1192.18
p2_201_306.tif	1	213	1191.91
p2_201_306.tif	1	214	1190.58
p2_201_306.tif	1	215	1189.16
p2_201_306.tif	1	216	1186.15
p2_201_306.tif	1	217	1186.15
p2_201_306.tif	1	218	1188.58
p2_201_306.tif	1	219	1189.35
p2_201_306.tif	1	220	1185.73
p2_201_306.tif	1	221	1190.78
p2_201_306.tif	1	222	1183.99
p2_201_306.tif	1	223	1184.45
p2_201_306.tif	1	224	1190.72
p2_201_306.tif	1	225	1183.65
p2_201_306.tif	1	226	1189.48
p2_201_306.tif	1	227	1186.45
p2_201_306.tif	1	228	1187.79
p2_201_306.tif	1	229	1187.74
p2_201_306.tif	1	230	1185.55
p2_201_306.tif	1	231	1183.32
p2_201_306.tif	1	232	1184.5
p2_201_306.tif	1	233	1183.32
p2_201_306.tif	1	234	1180.71
p2_201_306.tif	1	235	1185.86
p2_201_306.tif	1	236	1182.89
p2_201_306.tif	1	237	1185.52
p2_201_306.tif	1	238	1183.85
p2_201_306.tif	1	239	1182.29
p2_201_306.tif	1	240	1183.72
p2_201_306.tif	1	241	1181.39
p2_201_306.tif	1	242	1182.18
p2_201_306.tif	1	243	1184.53
p2_201_306.tif	1	244	1181.68
p2_201_306.tif	1	245	1182.31
p2_201_306.tif	1	246	1178.3
p2_201_306.tif	1	247	1190
p2_201_306.tif	1	248	1191.54
p2_201_306.tif	1	249	1187.65
p2_201_306.tif	1	250	1179.73
p2_201_306.tif	1	251	1179.5
p2_201_306.tif	1	252	1186.47
p2_201_306.tif	1	253	1187.22
p2_201_306.tif	1	254	1173.02
p2_201_306.tif	1	255	1189.21
p2_201_306.tif	1	256	1178.47
p2_201_306.tif	1	257	1177.65
p2_201_306.tif	1	258	1184.68
p2_201_306.tif	1	259	1180.87
p2_201_306.tif	1	260	1181.75
p2_201_306.tif	1	261	1180.34
p2_201_306.tif	1	262	1179.87
p2_201_306.tif	1	263	1180.28
p2_201_306.tif	1	264	1183.12
p2_201_306.tif	1	265	1179.81
p2_201_306.tif	1	266	1180.7
p2_201_306.tif	1	267	1176.96
p2_201_306.tif	1	268	1175.94
p2_201_306.tif	1	269	1178
p2_201_306.tif	1	270	1180.33
p2_201_306.tif	1	271	1178.65
p2_201_306.tif	1	272	1178.76
p2_201_306.tif	1	273	1174.88
p2_201_306.tif	1	274	1183.79
p2_201_306.tif	1	275	1179.27
p2_201_306.tif	1	276	1178.24
p2_201_306.tif	1	277	1178.95
p2_201_306.tif	1	278	1178.17
p2_201_306.tif	1	279	1176.38
p2_201_306.tif	1	280	1174.59
p2_201_306.tif	1	281	1180.57
p2_201_306.tif	1	282	1178.23
p2_201_306.tif	1	283	1179.22
p2_201_306.tif	1	284	1178.99
p2_201_306.tif	1	285	1184.9
p2_201_306.tif	1	286	1186.55
p2_201_306.tif	1	287	1180.08
p2_201_306.tif	1	288	1174.97
p2_201_306.tif	1	289	1175.11
p2_201_306.tif	1	290	1179.76
p2_201_306.tif	1	291	1172.25
p2_201_306.tif	1	292	1174.48
p2_201_306.tif	1	293	1177.58
p2_201_306.tif	1	294	1181.48
p2_201_306.tif	1	295	1172.48
p2_201_306.tif	1	296	1177.6
p2_201_306.tif	1	297	1173.91
p2_201_306.tif	1	298	1178.22
p2_201_306.tif	1	299	1177.31
p2_201_306.tif	1	300	1180.92
p2_201_306.tif	1	301	1176.78
p2_201_306.tif	1	302	1181.63
p2_201_306.tif	1	303	1180.29
p2_201_306.tif	1	304	1186.99
p2_201_306.tif	1	305	1182.49
p2_201_306.tif	1	306	1176.7
p2_1_100.tif	2	1	1946.4
p2_1_100.tif	2	2	1945.84
p2_1_100.tif	2	3	1942.58
p2_1_100.tif	2	4	1946.27
p2_1_100.tif	2	5	1948.58
p2_1_100.tif	2	6	1948.08
p2_1_100.tif	2	7	1948.82
p2_1_100.tif	2	8	1948.71
p2_1_100.tif	2	9	1948.38
p2_1_100.tif	2	10	1951.58
p2_1_100.tif	2	11	1943.46
p2_1_100.tif	2	12	1953.74
p2_1_100.tif	2	13	1951.59
p2_1_100.tif	2	14	1953.37
p2_1_100.tif	2	15	1947.31
p2_1_100.tif	2	16	1954.77
p2_1_100.tif	2	17	1949.92
p2_1_100.tif	2	18	1948.52
p2_1_100.tif	2	19	1955.45
p2_1_100.tif	2	20	1962.08
p2_1_100.tif	2	21	1964.63
p2_1_100.tif	2	22	2010.64
p2_1_100.tif	2	23	1840.86
p2_1_100.tif	2	24	2010.13
p2_1_100.tif	2	25	1963.55
p2_1_100.tif	2	26	1955.25
p2_1_100.tif	2	27	1954.91
p2_1_100.tif	2	28	1954.93
p2_1_100.tif	2	29	1953.7
p2_1_100.tif	2	30	1954.39
p2_1_100.tif	2	31	1952.22
p2_1_100.tif	2	32	1949.24
p2_1_100.tif	2	33	1955.24
p2_1_100.tif	2	34	1897.2
p2_1_100.tif	2	35	1796.71
p2_1_100.tif	2	36	1992.98
p2_1_100.tif	2	37	1950.38
p2_1_100.tif	2	38	1971.57
p2_1_100.tif	2	39	1972.98
p2_1_100.tif	2	40	1982.06
p2_1_100.tif	2	41	1990.22
p2_1_100.tif	2	42	1991.39
p2_1_100.tif	2	43	1992.68
p2_1_100.tif	2	44	1989.27
p2_1_100.tif	2	45	1991.06
p2_1_100.tif	2	46	1985.87
p2_1_100.tif	2	47	1981.87
p2_1_100.tif	2	48	1985.43
p2_1_100.tif	2	49	1985.88
p2_1_100.tif	2	50	1982.26
p2_1_100.tif	2	51	1982.39
p2_1_100.tif	2	52	1985.38
p2_1_100.tif	2	53	1980.43
p2_1_100.tif	2	54	1981.03
p2_1_100.tif	2	55	2022.25
p2_1_100.tif	2	56	1012.97
p2_1_100.tif	2	57	1957.51
p2_1_100.tif	2	58	2022.88
p2_1_100.tif	2	59	2013.36
p2_1_100.tif	2	60	1982.02
p2_1_100.tif	2	61	1981.6
p2_1_100.tif	2	62	1979.03
p2_1_100.tif	2	63	1970.85
p2_1_100.tif	2	64	1976.75
p2_1_100.tif	2	65	1967.04
p2_1_100.tif	2	66	1981.58
p2_1_100.tif	2	67	1972.02
p2_1_100.tif	2	68	1972.35
p2_1_100.tif	2	69	1974.92
p2_1_100.tif	2	70	1976
p2_1_100.tif	2	71	1981.45
p2_1_100.tif	2	72	1978.91
p2_1_100.tif	2	73	1978.45
p2_1_100.tif	2	74	1984.21
p2_1_100.tif	2	75	1976.34
p2_1_100.tif	2	76	1972.91
p2_1_100.tif	2	77	1970.79
p2_1_100.tif	2	78	1976.98
p2_1_100.tif	2	79	1926.65
p2_1_100.tif	2	80	1976.28
p2_1_100.tif	2	81	1972.66
p2_1_100.tif	2	82	1976.49
p2_1_100.tif	2	83	1976.18
p2_1_100.tif	2	84	1977.83
p2_1_100.tif	2	85	1979.38
p2_1_100.tif	2	86	1979.37
p2_1_100.tif	2	87	1975.42
p2_1_100.tif	2	88	1978.04
p2_1_100.tif	2	89	1975.32
p2_1_100.tif	2	90	1969.1
p2_1_100.tif	2	91	1968.01
p2_1_100.tif	2	92	1969
p2_1_100.tif	2	93	1969.34
p2_1_100.tif	2	94	1981.91
p2_1_100.tif	2	95	1974.86
p2_1_100.tif	2	96	1965.14
p2_1_100.tif	2	97	1975.75
p2_1_100.tif	2	98	1975.29
p2_1_100.tif	2	99	1978.23
p2_1_100.tif	2	100	1966.18
p2_101_200.tif	2	101	1960.74
p2_101_200.tif	2	102	1949.46
p2_101_200.tif	2	103	1957.08
p2_101_200.tif	2	104	1961.32
p2_101_200.tif	2	105	1962.66
p2_101_200.tif	2	106	1957.65
p2_101_200.tif	2	107	1963.38
p2_101_200.tif	2	108	1956.17
p2_101_200.tif	2	109	1962.9
p2_101_200.tif	2	110	1957.78
p2_101_200.tif	2	111	1955.58
p2_101_200.tif	2	112	1956.58
p2_101_200.tif	2	113	1957.07
p2_101_200.tif	2	114	1957.5
p2_101_200.tif	2	115	1952.39
p2_101_200.tif	2	116	1957.62
p2_101_200.tif	2	117	1957.75
p2_101_200.tif	2	118	1958.72
p2_101_200.tif	2	119	1958.75
p2_101_200.tif	2	120	1955.46
p2_101_200.tif	2	121	1954.34
p2_101_200.tif	2	122	1957.55
p2_101_200.tif	2	123	1960.77
p2_101_200.tif	2	124	1950.76
p2_101_200.tif	2	125	1953.61
p2_101_200.tif	2	126	1950.65
p2_101_200.tif	2	127	1949.69
p2_101_200.tif	2	128	1954.52
p2_101_200.tif	2	129	1951.86
p2_101_200.tif	2	130	1946.06
p2_101_200.tif	2	131	1950.29
p2_101_200.tif	2	132	1950.78
p2_101_200.tif	2	133	1954.29
p2_101_200.tif	2	134	1952.5
p2_101_200.tif	2	135	1949.53
p2_101_200.tif	2	136	1942.9
p2_101_200.tif	2	137	1956.85
p2_101_200.tif	2	138	1960.92
p2_101_200.tif	2	139	1955.66
p2_101_200.tif	2	140	1958.86
p2_101_200.tif	2	141	1961.11
p2_101_200.tif	2	142	1961.22
p2_101_200.tif	2	143	1952.24
p2_101_200.tif	2	144	1953.65
p2_101_200.tif	2	145	1947.07
p2_101_200.tif	2	146	1957.26
p2_101_200.tif	2	147	1942.23
p2_101_200.tif	2	148	1949.02
p2_101_200.tif	2	149	1941.43
p2_101_200.tif	2	150	1942.76
p2_101_200.tif	2	151	1941.33
p2_101_200.tif	2	152	1940.51
p2_101_200.tif	2	153	1936.37
p2_101_200.tif	2	154	1937.9
p2_101_200.tif	2	155	1933.5
p2_101_200.tif	2	156	1929.13
p2_101_200.tif	2	157	1931.99
p2_101_200.tif	2	158	1923.27
p2_101_200.tif	2	159	1924.08
p2_101_200.tif	2	160	1924.99
p2_101_200.tif	2	161	1917.72
p2_101_200.tif	2	162	1916.53
p2_101_200.tif	2	163	1911.06
p2_101_200.tif	2	164	1918.88
p2_101_200.tif	2	165	1905.67
p2_101_200.tif	2	166	1917.36
p2_101_200.tif	2	167	1905.9
p2_101_200.tif	2	168	1895.19
p2_101_200.tif	2	169	1900.38
p2_101_200.tif	2	170	1899.57
p2_101_200.tif	2	171	1892.36
p2_101_200.tif	2	172	1894.32
p2_101_200.tif	2	173	1897.85
p2_101_200.tif	2	174	1893.14
p2_101_200.tif	2	175	1887.35
p2_101_200.tif	2	176	1883.5
p2_101_200.tif	2	177	1880.02
p2_101_200.tif	2	178	1883.56
p2_101_200.tif	2	179	1873.53
p2_101_200.tif	2	180	1880.12
p2_101_200.tif	2	181	1880.28
p2_101_200.tif	2	182	1874.03
p2_101_200.tif	2	183	1873.5
p2_101_200.tif	2	184	1859.19
p2_101_200.tif	2	185	1869.16
p2_101_200.tif	2	186	1861.99
p2_101_200.tif	2	187	1861.81
p2_101_200.tif	2	188	1867.14
p2_101_200.tif	2	189	1864.11
p2_101_200.tif	2	190	1859.87
p2_101_200.tif	2	191	1864.48
p2_101_200.tif	2	192	1859.06
p2_101_200.tif	2	193	1854.45
p2_101_200.tif	2	194	1850.52
p2_101_200.tif	2	195	1848.24
p2_101_200.tif	2	196	1845.84
p2_101_200.tif	2	197	1849.16
p2_101_200.tif	2	198	1846.98
p2_101_200.tif	2	199	1841.4
p2_101_200.tif	2	200	1848.13
p2_201_306.tif	2	201	1830.87
p2_201_306.tif	2	202	1824.1
p2_201_306.tif	2	203	1827.17
p2_201_306.tif	2	204	1832.46
p2_201_306.tif	2	205	1825.04
p2_201_306.tif	2	206	1832.19
p2_201_306.tif	2	207	1830.21
p2_201_306.tif	2	208	1826.45
p2_201_306.tif	2	209	1821.41
p2_201_306.tif	2	210	1824.94
p2_201_306.tif	2	211	1822.54
p2_201_306.tif	2	212	1818.53
p2_201_306.tif	2	213	1825.72
p2_201_306.tif	2	214	1821.04
p2_201_306.tif	2	215	1822.16
p2_201_306.tif	2	216	1815.98
p2_201_306.tif	2	217	1817.53
p2_201_306.tif	2	218	1814.24
p2_201_306.tif	2	219	1811.83
p2_201_306.tif	2	220	1816.04
p2_201_306.tif	2	221	1812.93
p2_201_306.tif	2	222	1810.15
p2_201_306.tif	2	223	1813.38
p2_201_306.tif	2	224	1812.29
p2_201_306.tif	2	225	1814.99
p2_201_306.tif	2	226	1812.96
p2_201_306.tif	2	227	1809.05
p2_201_306.tif	2	228	1812.68
p2_201_306.tif	2	229	1810.07
p2_201_306.tif	2	230	1809.84
p2_201_306.tif	2	231	1808.93
p2_201_306.tif	2	232	1812.79
p2_201_306.tif	2	233	1813.49
p2_201_306.tif	2	234	1811.02
p2_201_306.tif	2	235	1800.89
p2_201_306.tif	2	236	1812.05
p2_201_306.tif	2	237	1819.13
p2_201_306.tif	2	238	1823.18
p2_201_306.tif	2	239	1817.51
p2_201_306.tif	2	240	1818.41
p2_201_306.tif	2	241	1821.15
p2_201_306.tif	2	242	1808.37
p2_201_306.tif	2	243	1814.1
p2_201_306.tif	2	244	1821.5
p2_201_306.tif	2	245	1818.24
p2_201_306.tif	2	246	1816.11
p2_201_306.tif	2	247	1814.51
p2_201_306.tif	2	248	1816.88
p2_201_306.tif	2	249	1812.09
p2_201_306.tif	2	250	1814.39
p2_201_306.tif	2	251	1816.71
p2_201_306.tif	2	252	1816.08
p2_201_306.tif	2	253	1812.22
p2_201_306.tif	2	254	1815.65
p2_201_306.tif	2	255	1814.51
p2_201_306.tif	2	256	1819.6
p2_201_306.tif	2	257	1814.57
p2_201_306.tif	2	258	1815.61
p2_201_306.tif	2	259	1819.26
p2_201_306.tif	2	260	1810.3
p2_201_306.tif	2	261	1813.57
p2_201_306.tif	2	262	1816.14
p2_201_306.tif	2	263	1811.26
p2_201_306.tif	2	264	1814.07
p2_201_306.tif	2	265	1805.7
p2_201_306.tif	2	266	1809.66
p2_201_306.tif	2	267	1812.61
p2_201_306.tif	2	268	1818.45
p2_201_306.tif	2	269	1811.66
p2_201_306.tif	2	270	1807.52
p2_201_306.tif	2	271	1817.05
p2_201_306.tif	2	272	1809.17
p2_201_306.tif	2	273	1809.4
p2_201_306.tif	2	274	1813.92
p2_201_306.tif	2	275	1810.89
p2_201_306.tif	2	276	1817.2
p2_201_306.tif	2	277	1808.43
p2_201_306.tif	2	278	1807.31
p2_201_306.tif	2	279	1807.92
p2_201_306.tif	2	280	1808.95
p2_201_306.tif	2	281	1806.23
p2_201_306.tif	2	282	1808.15
p2_201_306.tif	2	283	1806.67
p2_201_306.tif	2	284	1810.01
p2_201_306.tif	2	285	1807.26
p2_201_306.tif	2	286	1806.26
p2_201_306.tif	2	287	1806.28
p2_201_306.tif	2	288	1809.16
p2_201_306.tif	2	289	1809.49
p2_201_306.tif	2	290	1810.76
p2_201_306.tif	2	291	1799.26
p2_201_306.tif	2	292	1806.15
p2_201_306.tif	2	293	1808.69
p2_201_306.tif	2	294	1809.59
p2_201_306.tif	2	295	1811.89
p2_201_306.tif	2	296	1809.54
p2_201_306.tif	2	297	1800.72
p2_201_306.tif	2	298	1809.91
p2_201_306.tif	2	299	1807.79
p2_201_306.tif	2	300	1804.27
p2_201_306.tif	2	301	1807.74
p2_201_306.tif	2	302	1809.27
p2_201_306.tif	2	303	1808.79
p2_201_306.tif	2	304	1811.08
p2_201_306.tif	2	305	1809.93
p2_201_306.tif	2	306	1810.66
p2_1_100.tif	3	1	2330.85
p2_1_100.tif	3	2	2329.16
p2_1_100.tif	3	3	2325.97
p2_1_100.tif	3	4	2328.08
p2_1_100.tif	3	5	2336.96
p2_1_100.tif	3	6	2333.09
p2_1_100.tif	3	7	2326.45
p2_1_100.tif	3	8	2332.71
p2_1_100.tif	3	9	2333.14
p2_1_100.tif	3	10	2336
p2_1_100.tif	3	11	2337.03
p2_1_100.tif	3	12	2336.15
p2_1_100.tif	3	13	2339.7
p2_1_100.tif	3	14	2336.68
p2_1_100.tif	3	15	2333.11
p2_1_100.tif	3	16	2332.28
p2_1_100.tif	3	17	2332.33
p2_1_100.tif	3	18	2332.82
p2_1_100.tif	3	19	2337
p2_1_100.tif	3	20	2338.39
p2_1_100.tif	3	21	2346.81
p2_1_100.tif	3	22	2390.04
p2_1_100.tif	3	23	2197.38
p2_1_100.tif	3	24	2409.33
p2_1_100.tif	3	25	2356.1
p2_1_100.tif	3	26	2349.15
p2_1_100.tif	3	27	2345.45
p2_1_100.tif	3	28	2348.73
p2_1_100.tif	3	29	2348.95
p2_1_100.tif	3	30	2343.91
p2_1_100.tif	3	31	2343.91
p2_1_100.tif	3	32	2343.68
p2_1_100.tif	3	33	2347.31
p2_1_100.tif	3	34	2296.11
p2_1_100.tif	3	35	2158.02
p2_1_100.tif	3	36	2405.19
p2_1_100.tif	3	37	2328.24
p2_1_100.tif	3	38	2360.33
p2_1_100.tif	3	39	2356.89
p2_1_100.tif	3	40	2356.55
p2_1_100.tif	3	41	2355.78
p2_1_100.tif	3	42	2363.3
p2_1_100.tif	3	43	2359.14
p2_1_100.tif	3	44	2361.42
p2_1_100.tif	3	45	2365.77
p2_1_100.tif	3	46	2348.81
p2_1_100.tif	3	47	2352.74
p2_1_100.tif	3	48	2352.83
p2_1_100.tif	3	49	2357.15
p2_1_100.tif	3	50	2350.68
p2_1_100.tif	3	51	2354.18
p2_1_100.tif	3	52	2362.72
p2_1_100.tif	3	53	2351.68
p2_1_100.tif	3	54	2365.74
p2_1_100.tif	3	55	2399.4
p2_1_100.tif	3	56	1146.95
p2_1_100.tif	3	57	2322.71
p2_1_100.tif	3	58	2403.04
p2_1_100.tif	3	59	2392.79
p2_1_100.tif	3	60	2366.6
p2_1_100.tif	3	61	2364.39
p2_1_100.tif	3	62	2353.1
p2_1_100.tif	3	63	2343.59
p2_1_100.tif	3	64	2347.92
p2_1_100.tif	3	65	2352.7
p2_1_100.tif	3	66	2358.74
p2_1_100.tif	3	67	2351.07
p2_1_100.tif	3	68	2338.86
p2_1_100.tif	3	69	2353.37
p2_1_100.tif	3	70	2346.82
p2_1_100.tif	3	71	2354.06
p2_1_100.tif	3	72	2353.49
p2_1_100.tif	3	73	2351.45
p2_1_100.tif	3	74	2360.02
p2_1_100.tif	3	75	2349.01
p2_1_100.tif	3	76	2353.03
p2_1_100.tif	3	77	2358.59
p2_1_100.tif	3	78	2353.68
p2_1_100.tif	3	79	2356.1
p2_1_100.tif	3	80	2467.69
p2_1_100.tif	3	81	2840.57
p2_1_100.tif	3	82	2351.79
p2_1_100.tif	3	83	2389
p2_1_100.tif	3	84	2345.63
p2_1_100.tif	3	85	2355.09
p2_1_100.tif	3	86	2357.04
p2_1_100.tif	3	87	2351.31
p2_1_100.tif	3	88	2348.43
p2_1_100.tif	3	89	2352.92
p2_1_100.tif	3	90	2349.04
p2_1_100.tif	3	91	2351.67
p2_1_100.tif	3	92	2356.01
p2_1_100.tif	3	93	2353.12
p2_1_100.tif	3	94	2347.92
p2_1_100.tif	3	95	2349.78
p2_1_100.tif	3	96	2351.71
p2_1_100.tif	3	97	2352.13
p2_1_100.tif	3	98	2352.14
p2_1_100.tif	3	99	2351.8
p2_1_100.tif	3	100	2328.96
p2_101_200.tif	3	101	2356.13
p2_101_200.tif	3	102	2355.72
p2_101_200.tif	3	103	2358.74
p2_101_200.tif	3	104	2355.36
p2_101_200.tif	3	105	2361.31
p2_101_200.tif	3	106	2356.41
p2_101_200.tif	3	107	2355.32
p2_101_200.tif	3	108	2352.02
p2_101_200.tif	3	109	2349.3
p2_101_200.tif	3	110	2351.33
p2_101_200.tif	3	111	2360.75
p2_101_200.tif	3	112	2358.58
p2_101_200.tif	3	113	2357.28
p2_101_200.tif	3	114	2351.33
p2_101_200.tif	3	115	2362.31
p2_101_200.tif	3	116	2354.54
p2_101_200.tif	3	117	2354.18
p2_101_200.tif	3	118	2354.63
p2_101_200.tif	3	119	2351.71
p2_101_200.tif	3	120	2358.04
p2_101_200.tif	3	121	2362.51
p2_101_200.tif	3	122	2354.63
p2_101_200.tif	3	123	2358.17
p2_101_200.tif	3	124	2350.7
p2_101_200.tif	3	125	2352.34
p2_101_200.tif	3	126	2360.13
p2_101_200.tif	3	127	2356.24
p2_101_200.tif	3	128	2356.08
p2_101_200.tif	3	129	2348.32
p2_101_200.tif	3	130	2351.32
p2_101_200.tif	3	131	2358.33
p2_101_200.tif	3	132	2357.17
p2_101_200.tif	3	133	2357.76
p2_101_200.tif	3	134	2352.76
p2_101_200.tif	3	135	2350.55
p2_101_200.tif	3	136	2350.63
p2_101_200.tif	3	137	2352.75
p2_101_200.tif	3	138	2351.1
p2_101_200.tif	3	139	2354.01
p2_101_200.tif	3	140	2346.9
p2_101_200.tif	3	141	2337.79
p2_101_200.tif	3	142	2344.41
p2_101_200.tif	3	143	2345.74
p2_101_200.tif	3	144	2345.86
p2_101_200.tif	3	145	2342.95
p2_101_200.tif	3	146	2344.47
p2_101_200.tif	3	147	2340.77
p2_101_200.tif	3	148	2337.19
p2_101_200.tif	3	149	2340.6
p2_101_200.tif	3	150	2339.98
p2_101_200.tif	3	151	2332.32
p2_101_200.tif	3	152	2331.16
p2_101_200.tif	3	153	2330.55
p2_101_200.tif	3	154	2333
p2_101_200.tif	3	155	2333.27
p2_101_200.tif	3	156	2325.98
p2_101_200.tif	3	157	2331.52
p2_101_200.tif	3	158	2334.9
p2_101_200.tif	3	159	2325.93
p2_101_200.tif	3	160	2323.42
p2_101_200.tif	3	161	2311.87
p2_101_200.tif	3	162	2321.99
p2_101_200.tif	3	163	2318.9
p2_101_200.tif	3	164	2319.63
p2_101_200.tif	3	165	2311.14
p2_101_200.tif	3	166	2318.7
p2_101_200.tif	3	167	2311.09
p2_101_200.tif	3	168	2308.51
p2_101_200.tif	3	169	2295.65
p2_101_200.tif	3	170	2309.81
p2_101_200.tif	3	171	2296.41
p2_101_200.tif	3	172	2291.86
p2_101_200.tif	3	173	2300.97
p2_101_200.tif	3	174	2295.3
p2_101_200.tif	3	175	2296.61
p2_101_200.tif	3	176	2289.88
p2_101_200.tif	3	177	2290.21
p2_101_200.tif	3	178	2281.09
p2_101_200.tif	3	179	2279.35
p2_101_200.tif	3	180	2274.71
p2_101_200.tif	3	181	2275.7
p2_101_200.tif	3	182	2272.68
p2_101_200.tif	3	183	2268.75
p2_101_200.tif	3	184	2260.36
p2_101_200.tif	3	185	2261.86
p2_101_200.tif	3	186	2259.04
p2_101_200.tif	3	187	2263.35
p2_101_200.tif	3	188	2253.83
p2_101_200.tif	3	189	2253.15
p2_101_200.tif	3	190	2251.98
p2_101_200.tif	3	191	2251.04
p2_101_200.tif	3	192	2254.04
p2_101_200.tif	3	193	2246.95
p2_101_200.tif	3	194	2238.27
p2_101_200.tif	3	195	2239.4
p2_101_200.tif	3	196	2235.05
p2_101_200.tif	3	197	2238.94
p2_101_200.tif	3	198	2234.69
p2_101_200.tif	3	199	2233.85
p2_101_200.tif	3	200	2235.91
p2_201_306.tif	3	201	2231.89
p2_201_306.tif	3	202	2226.76
p2_201_306.tif	3	203	2235.4
p2_201_306.tif	3	204	2225.52
p2_201_306.tif	3	205	2230.85
p2_201_306.tif	3	206	2229.01
p2_201_306.tif	3	207	2221.14
p2_201_306.tif	3	208	2225.8
p2_201_306.tif	3	209	2220.06
p2_201_306.tif	3	210	2221.84
p2_201_306.tif	3	211	2219.3
p2_201_306.tif	3	212	2211.99
p2_201_306.tif	3	213	2212.77
p2_201_306.tif	3	214	2215.72
p2_201_306.tif	3	215	2212.09
p2_201_306.tif	3	216	2209.83
p2_201_306.tif	3	217	2204.46
p2_201_306.tif	3	218	2209.97
p2_201_306.tif	3	219	2208.21
p2_201_306.tif	3	220	2197.19
p2_201_306.tif	3	221	2205.07
p2_201_306.tif	3	222	2210.26
p2_201_306.tif	3	223	2209.4
p2_201_306.tif	3	224	2208.81
p2_201_306.tif	3	225	2202.96
p2_201_306.tif	3	226	2198.34
p2_201_306.tif	3	227	2200
p2_201_306.tif	3	228	2203.45
p2_201_306.tif	3	229	2196.7
p2_201_306.tif	3	230	2198.51
p2_201_306.tif	3	231	2195.76
p2_201_306.tif	3	232	2196.14
p2_201_306.tif	3	233	2196.07
p2_201_306.tif	3	234	2194.56
p2_201_306.tif	3	235	2184.44
p2_201_306.tif	3	236	2192.65
p2_201_306.tif	3	237	2185.67
p2_201_306.tif	3	238	2191.96
p2_201_306.tif	3	239	2189.03
p2_201_306.tif	3	240	2190.95
p2_201_306.tif	3	241	2188.47
p2_201_306.tif	3	242	2183.78
p2_201_306.tif	3	243	2187.19
p2_201_306.tif	3	244	2188.8
p2_201_306.tif	3	245	2190.52
p2_201_306.tif	3	246	2187.03
p2_201_306.tif	3	247	2184.67
p2_201_306.tif	3	248	2184.55
p2_201_306.tif	3	249	2183.19
p2_201_306.tif	3	250	2182.81
p2_201_306.tif	3	251	2184.89
p2_201_306.tif	3	252	2186.64
p2_201_306.tif	3	253	2178.32
p2_201_306.tif	3	254	2184.9
p2_201_306.tif	3	255	2184.08
p2_201_306.tif	3	256	2183.86
p2_201_306.tif	3	257	2180.88
p2_201_306.tif	3	258	2180.46
p2_201_306.tif	3	259	2189.56
p2_201_306.tif	3	260	2178.55
p2_201_306.tif	3	261	2180.67
p2_201_306.tif	3	262	2177.1
p2_201_306.tif	3	263	2183.15
p2_201_306.tif	3	264	2177.04
p2_201_306.tif	3	265	2179.27
p2_201_306.tif	3	266	2186.42
p2_201_306.tif	3	267	2175.3
p2_201_306.tif	3	268	2175.36
p2_201_306.tif	3	269	2178.59
p2_201_306.tif	3	270	2181.11
p2_201_306.tif	3	271	2184.06
p2_201_306.tif	3	272	2173.37
p2_201_306.tif	3	273	2177.16
p2_201_306.tif	3	274	2183.38
p2_201_306.tif	3	275	2174.31
p2_201_306.tif	3	276	2178.56
p2_201_306.tif	3	277	2180.62
p2_201_306.tif	3	278	2178.01
p2_201_306.tif	3	279	2176.86
p2_201_306.tif	3	280	2175.08
p2_201_306.tif	3	281	2179.29
p2_201_306.tif	3	282	2175.61
p2_201_306.tif	3	283	2178.03
p2_201_306.tif	3	284	2176.01
p2_201_306.tif	3	285	2178.92
p2_201_306.tif	3	286	2178.81
p2_201_306.tif	3	287	2184
p2_201_306.tif	3	288	2174.72
p2_201_306.tif	3	289	2181.99
p2_201_306.tif	3	290	2173.94
p2_201_306.tif	3	291	2177.32
p2_201_306.tif	3	292	2174.39
p2_201_306.tif	3	293	2176.6
p2_201_306.tif	3	294	2170.15
p2_201_306.tif	3	295	2176.67
p2_201_306.tif	3	296	2174.75
p2_201_306.tif	3	297	2171.77
p2_201_306.tif	3	298	2166.97
p2_201_306.tif	3	299	2177.21
p2_201_306.tif	3	300	2174.89
p2_201_306.tif	3	301	2167.19
p2_201_306.tif	3	302	2172.2
p2_201_306.tif	3	303	2173.74
p2_201_306.tif	3	304	2175.59
p2_201_306.tif	3	305	2176.61
p2_201_306.tif	3	306	2177.92
p2_1_100.tif	4	1	1807.27
p2_1_100.tif	4	2	1801.42
p2_1_100.tif	4	3	1802
p2_1_100.tif	4	4	1800.04
p2_1_100.tif	4	5	1806.78
p2_1_100.tif	4	6	1806.61
p2_1_100.tif	4	7	1804.49
p2_1_100.tif	4	8	1808.59
p2_1_100.tif	4	9	1810.8
p2_1_100.tif	4	10	1805.56
p2_1_100.tif	4	11	1809.98
p2_1_100.tif	4	12	1808.15
p2_1_100.tif	4	13	1808.97
p2_1_100.tif	4	14	1813.52
p2_1_100.tif	4	15	1813.71
p2_1_100.tif	4	16	1815.08
p2_1_100.tif	4	17	1809.98
p2_1_100.tif	4	18	1807.28
p2_1_100.tif	4	19	1813.66
p2_1_100.tif	4	20	1812.96
p2_1_100.tif	4	21	1824.56
p2_1_100.tif	4	22	1869.53
p2_1_100.tif	4	23	1648.12
p2_1_100.tif	4	24	1884.16
p2_1_100.tif	4	25	1822.55
p2_1_100.tif	4	26	1818.84
p2_1_100.tif	4	27	1813.34
p2_1_100.tif	4	28	1816.55
p2_1_100.tif	4	29	1821.95
p2_1_100.tif	4	30	1818.92
p2_1_100.tif	4	31	1820.61
p2_1_100.tif	4	32	1817.45
p2_1_100.tif	4	33	1823.87
p2_1_100.tif	4	34	1775.42
p2_1_100.tif	4	35	1473.13
p2_1_100.tif	4	36	1869.94
p2_1_100.tif	4	37	1824.96
p2_1_100.tif	4	38	1827.73
p2_1_100.tif	4	39	1831.58
p2_1_100.tif	4	40	1837.27
p2_1_100.tif	4	41	1836.76
p2_1_100.tif	4	42	1842.82
p2_1_100.tif	4	43	1841.1
p2_1_100.tif	4	44	1840.99
p2_1_100.tif	4	45	1838.45
p2_1_100.tif	4	46	1845.18
p2_1_100.tif	4	47	1839.1
p2_1_100.tif	4	48	1844.74
p2_1_100.tif	4	49	1838.34
p2_1_100.tif	4	50	1834.31
p2_1_100.tif	4	51	1836.17
p2_1_100.tif	4	52	1841.05
p2_1_100.tif	4	53	1839.78
p2_1_100.tif	4	54	1848.45
p2_1_100.tif	4	55	1891.47
p2_1_100.tif	4	56	790.732
p2_1_100.tif	4	57	1775.98
p2_1_100.tif	4	58	1896.26
p2_1_100.tif	4	59	1882.77
p2_1_100.tif	4	60	1844.98
p2_1_100.tif	4	61	1841.57
p2_1_100.tif	4	62	1836.55
p2_1_100.tif	4	63	1827.18
p2_1_100.tif	4	64	1838.97
p2_1_100.tif	4	65	1835.85
p2_1_100.tif	4	66	1838.56
p2_1_100.tif	4	67	1839.19
p2_1_100.tif	4	68	1835.32
p2_1_100.tif	4	69	1868.87
p2_1_100.tif	4	70	1842.85
p2_1_100.tif	4	71	1835.48
p2_1_100.tif	4	72	1834.37
p2_1_100.tif	4	73	1837.77
p2_1_100.tif	4	74	1842.84
p2_1_100.tif	4	75	1839.27
p2_1_100.tif	4	76	1847.01
p2_1_100.tif	4	77	1849.98
p2_1_100.tif	4	78	1839.68
p2_1_100.tif	4	79	1840.77
p2_1_100.tif	4	80	1838.88
p2_1_100.tif	4	81	1801.56
p2_1_100.tif	4	82	1815.82
p2_1_100.tif	4	83	1836
p2_1_100.tif	4	84	1849.11
p2_1_100.tif	4	85	1839.84
p2_1_100.tif	4	86	1839.72
p2_1_100.tif	4	87	1840.59
p2_1_100.tif	4	88	1839.33
p2_1_100.tif	4	89	1839.16
p2_1_100.tif	4	90	1838.06
p2_1_100.tif	4	91	1837.67
p2_1_100.tif	4	92	1836.96
p2_1_100.tif	4	93	1837.7
p2_1_100.tif	4	94	1839.37
p2_1_100.tif	4	95	1836.95
p2_1_100.tif	4	96	1837.75
p2_1_100.tif	4	97	1837.49
p2_1_100.tif	4	98	1831.56
p2_1_100.tif	4	99	1836.13
p2_1_100.tif	4	100	1837.45
p2_101_200.tif	4	101	1823.4
p2_101_200.tif	4	102	1822.85
p2_101_200.tif	4	103	1829.57
p2_101_200.tif	4	104	1823.59
p2_101_200.tif	4	105	1826.58
p2_101_200.tif	4	106	1819
p2_101_200.tif	4	107	1822.05
p2_101_200.tif	4	108	1817.13
p2_101_200.tif	4	109	1828.38
p2_101_200.tif	4	110	1825.26
p2_101_200.tif	4	111	1821.86
p2_101_200.tif	4	112	1821.72
p2_101_200.tif	4	113	1821.35
p2_101_200.tif	4	114	1825.96
p2_101_200.tif	4	115	1824.73
p2_101_200.tif	4	116	1825.56
p2_101_200.tif	4	117	1819.74
p2_101_200.tif	4	118	1819.59
p2_101_200.tif	4	119	1824.21
p2_101_200.tif	4	120	1824.14
p2_101_200.tif	4	121	1830.3
p2_101_200.tif	4	122	1817.86
p2_101_200.tif	4	123	1822.9
p2_101_200.tif	4	124	1820.49
p2_101_200.tif	4	125	1820.78
p2_101_200.tif	4	126	1816.85
p2_101_200.tif	4	127	1824.21
p2_101_200.tif	4	128	1822.98
p2_101_200.tif	4	129	1824.5
p2_101_200.tif	4	130	1817.33
p2_101_200.tif	4	131	1827.03
p2_101_200.tif	4	132	1824.58
p2_101_200.tif	4	133	1819.82
p2_101_200.tif	4	134	1823.42
p2_101_200.tif	4	135	1820.08
p2_101_200.tif	4	136	1817.97
p2_101_200.tif	4	137	1826.16
p2_101_200.tif	4	138	1831.3
p2_101_200.tif	4	139	1836.23
p2_101_200.tif	4	140	1834.47
p2_101_200.tif	4	141	1831.7
p2_101_200.tif	4	142	1832.71
p2_101_200.tif	4	143	1832
p2_101_200.tif	4	144	1835.44
p2_101_200.tif	4	145	1825.88
p2_101_200.tif	4	146	1830.18
p2_101_200.tif	4	147	1830.41
p2_101_200.tif	4	148	1833.01
p2_101_200.tif	4	149	1823.97
p2_101_200.tif	4	150	1829.72
p2_101_200.tif	4	151	1823.84
p2_101_200.tif	4	152	1816.15
p2_101_200.tif	4	153	1820.46
p2_101_200.tif	4	154	1820.38
p2_101_200.tif	4	155	1822.03
p2_101_200.tif	4	156	1816.9
p2_101_200.tif	4	157	1822.08
p2_101_200.tif	4	158	1818.24
p2_101_200.tif	4	159	1816.16
p2_101_200.tif	4	160	1813.5
p2_101_200.tif	4	161	1814.56
p2_101_200.tif	4	162	1812.88
p2_101_200.tif	4	163	1812.79
p2_101_200.tif	4	164	1802.99
p2_101_200.tif	4	165	1800.06
p2_101_200.tif	4	166	1808.76
p2_101_200.tif	4	167	1802.92
p2_101_200.tif	4	168	1804.55
p2_101_200.tif	4	169	1797.51
p2_101_200.tif	4	170	1796.62
p2_101_200.tif	4	171	1793.82
p2_101_200.tif	4	172	1801.22
p2_101_200.tif	4	173	1792.93
p2_101_200.tif	4	174	1792.2
p2_101_200.tif	4	175	1794.5
p2_101_200.tif	4	176	1785.63
p2_101_200.tif	4	177	1784.02
p2_101_200.tif	4	178	1779.88
p2_101_200.tif	4	179	1778.26
p2_101_200.tif	4	180	1782.17
p2_101_200.tif	4	181	1778.76
p2_101_200.tif	4	182	1777.43
p2_101_200.tif	4	183	1773.45
p2_101_200.tif	4	184	1767.4
p2_101_200.tif	4	185	1780.72
p2_101_200.tif	4	186	1769.52
p2_101_200.tif	4	187	1765.36
p2_101_200.tif	4	188	1765.93
p2_101_200.tif	4	189	1767.89
p2_101_200.tif	4	190	1762.16
p2_101_200.tif	4	191	1753.79
p2_101_200.tif	4	192	1755.91
p2_101_200.tif	4	193	1755.95
p2_101_200.tif	4	194	1751.18
p2_101_200.tif	4	195	1752.05
p2_101_200.tif	4	196	1752.55
p2_101_200.tif	4	197	1750.35
p2_101_200.tif	4	198	1750.4
p2_101_200.tif	4	199	1745.31
p2_101_200.tif	4	200	1743.38
p2_201_306.tif	4	201	1728.69
p2_201_306.tif	4	202	1726.65
p2_201_306.tif	4	203	1723.19
p2_201_306.tif	4	204	1723.08
p2_201_306.tif	4	205	1724.5
p2_201_306.tif	4	206	1714.82
p2_201_306.tif	4	207	1718.13
p2_201_306.tif	4	208	1715.37
p2_201_306.tif	4	209	1708.2
p2_201_306.tif	4	210	1706.69
p2_201_306.tif	4	211	1708.38
p2_201_306.tif	4	212	1710.02
p2_201_306.tif	4	213	1714
p2_201_306.tif	4	214	1705.98
p2_201_306.tif	4	215	1707.82
p2_201_306.tif	4	216	1702.74
p2_201_306.tif	4	217	1706.4
p2_201_306.tif	4	218	1703.3
p2_201_306.tif	4	219	1705.69
p2_201_306.tif	4	220	1701.97
p2_201_306.tif	4	221	1705.08
p2_201_306.tif	4	222	1695.31
p2_201_306.tif	4	223	1694.65
p2_201_306.tif	4	224	1694.39
p2_201_306.tif	4	225	1696.62
p2_201_306.tif	4	226	1694.42
p2_201_306.tif	4	227	1686.4
p2_201_306.tif	4	228	1685.55
p2_201_306.tif	4	229	1689.09
p2_201_306.tif	4	230	1686.82
p2_201_306.tif	4	231	1690.67
p2_201_306.tif	4	232	1690.16
p2_201_306.tif	4	233	1685.79
p2_201_306.tif	4	234	1683.86
p2_201_306.tif	4	235	1688
p2_201_306.tif	4	236	1683.46
p2_201_306.tif	4	237	1704.44
p2_201_306.tif	4	238	1702.28
p2_201_306.tif	4	239	1699.03
p2_201_306.tif	4	240	1696.68
p2_201_306.tif	4	241	1699.75
p2_201_306.tif	4	242	1702.72
p2_201_306.tif	4	243	1704.34
p2_201_306.tif	4	244	1695.97
p2_201_306.tif	4	245	1693.44
p2_201_306.tif	4	246	1697.67
p2_201_306.tif	4	247	1695.87
p2_201_306.tif	4	248	1699.34
p2_201_306.tif	4	249	1694.17
p2_201_306.tif	4	250	1700.77
p2_201_306.tif	4	251	1697.49
p2_201_306.tif	4	252	1693.24
p2_201_306.tif	4	253	1694.4
p2_201_306.tif	4	254	1696.72
p2_201_306.tif	4	255	1687.73
p2_201_306.tif	4	256	1693.58
p2_201_306.tif	4	257	1692.57
p2_201_306.tif	4	258	1696.36
p2_201_306.tif	4	259	1696.43
p2_201_306.tif	4	260	1691.24
p2_201_306.tif	4	261	1696.95
p2_201_306.tif	4	262	1695.34
p2_201_306.tif	4	263	1690.38
p2_201_306.tif	4	264	1689.81
p2_201_306.tif	4	265	1685.4
p2_201_306.tif	4	266	1692.6
p2_201_306.tif	4	267	1691.28
p2_201_306.tif	4	268	1685.84
p2_201_306.tif	4	269	1682.93
p2_201_306.tif	4	270	1686.69
p2_201_306.tif	4	271	1690.71
p2_201_306.tif	4	272	1688.48
p2_201_306.tif	4	273	1683.58
p2_201_306.tif	4	274	1685.93
p2_201_306.tif	4	275	1684.74
p2_201_306.tif	4	276	1686.11
p2_201_306.tif	4	277	1684.62
p2_201_306.tif	4	278	1685.97
p2_201_306.tif	4	279	1687.91
p2_201_306.tif	4	280	1690.27
p2_201_306.tif	4	281	1693.7
p2_201_306.tif	4	282	1684.91
p2_201_306.tif	4	283	1677.61
p2_201_306.tif	4	284	1681.05
p2_201_306.tif	4	285	1686.11
p2_201_306.tif	4	286	1680.44
p2_201_306.tif	4	287	1677.81
p2_201_306.tif	4	288	1677.68
p2_201_306.tif	4	289	1686.18
p2_201_306.tif	4	290	1679.66
p2_201_306.tif	4	291	1680.35
p2_201_306.tif	4	292	1678.84
p2_201_306.tif	4	293	1680.95
p2_201_306.tif	4	294	1679.52
p2_201_306.tif	4	295	1677.45
p2_201_306.tif	4	296	1682.42
p2_201_306.tif	4	297	1674.56
p2_201_306.tif	4	298	1679.93
p2_201_306.tif	4	299	1674.83
p2_201_306.tif	4	300	1673.08
p2_201_306.tif	4	301	1676.81
p2_201_306.tif	4	302	1675.42
p2_201_306.tif	4	303	1674.63
p2_201_306.tif	4	304	1676.58
p2_201_306.tif	4	305	1677.86
p2_201_306.tif	4	306	1681.24
p2_1_100.tif	5	1	973.413
p2_1_100.tif	5	2	973.04
p2_1_100.tif	5	3	973.341
p2_1_100.tif	5	4	970.104
p2_1_100.tif	5	5	973.946
p2_1_100.tif	5	6	971.07
p2_1_100.tif	5	7	978.48
p2_1_100.tif	5	8	977.14
p2_1_100.tif	5	9	970.17
p2_1_100.tif	5	10	977.435
p2_1_100.tif	5	11	972.275
p2_1_100.tif	5	12	980.85
p2_1_100.tif	5	13	974.733
p2_1_100.tif	5	14	969.642
p2_1_100.tif	5	15	973.872
p2_1_100.tif	5	16	974.829
p2_1_100.tif	5	17	975.399
p2_1_100.tif	5	18	974.532
p2_1_100.tif	5	19	979.586
p2_1_100.tif	5	20	979.152
p2_1_100.tif	5	21	977.864
p2_1_100.tif	5	22	981.687
p2_1_100.tif	5	23	646.32
p2_1_100.tif	5	24	992.779
p2_1_100.tif	5	25	983.311
p2_1_100.tif	5	26	976.352
p2_1_100.tif	5	27	975.375
p2_1_100.tif	5	28	973.158
p2_1_100.tif	5	29	976.063
p2_1_100.tif	5	30	980.489
p2_1_100.tif	5	31	979.237
p2_1_100.tif	5	32	979.441
p2_1_100.tif	5	33	969.283
p2_1_100.tif	5	34	967.721
p2_1_100.tif	5	35	577.595
p2_1_100.tif	5	36	962.064
p2_1_100.tif	5	37	984.995
p2_1_100.tif	5	38	996.855
p2_1_100.tif	5	39	993.096
p2_1_100.tif	5	40	996.171
p2_1_100.tif	5	41	991.011
p2_1_100.tif	5	42	993.139
p2_1_100.tif	5	43	1001.24
p2_1_100.tif	5	44	996.205
p2_1_100.tif	5	45	998.445
p2_1_100.tif	5	46	1006.67
p2_1_100.tif	5	47	998.126
p2_1_100.tif	5	48	1002.16
p2_1_100.tif	5	49	996.422
p2_1_100.tif	5	50	995.055
p2_1_100.tif	5	51	997.667
p2_1_100.tif	5	52	999.967
p2_1_100.tif	5	53	1003.23
p2_1_100.tif	5	54	1004.47
p2_1_100.tif	5	55	1019.16
p2_1_100.tif	5	56	278.56
p2_1_100.tif	5	57	752.321
p2_1_100.tif	5	58	1017.28
p2_1_100.tif	5	59	1004.9
p2_1_100.tif	5	60	994.22
p2_1_100.tif	5	61	988.065
p2_1_100.tif	5	62	994.224
p2_1_100.tif	5	63	991.022
p2_1_100.tif	5	64	1004.87
p2_1_100.tif	5	65	994.233
p2_1_100.tif	5	66	992.702
p2_1_100.tif	5	67	991.246
p2_1_100.tif	5	68	999.31
p2_1_100.tif	5	69	995.354
p2_1_100.tif	5	70	995.006
p2_1_100.tif	5	71	999.295
p2_1_100.tif	5	72	993.326
p2_1_100.tif	5	73	996.356
p2_1_100.tif	5	74	995.929
p2_1_100.tif	5	75	997.504
p2_1_100.tif	5	76	1000.66
p2_1_100.tif	5	77	993.503
p2_1_100.tif	5	78	984.067
p2_1_100.tif	5	79	993.073
p2_1_100.tif	5	80	995.828
p2_1_100.tif	5	81	993.121
p2_1_100.tif	5	82	986.479
p2_1_100.tif	5	83	990.617
p2_1_100.tif	5	84	994.384
p2_1_100.tif	5	85	996.134
p2_1_100.tif	5	86	1001.76
p2_1_100.tif	5	87	989.091
p2_1_100.tif	5	88	993.946
p2_1_100.tif	5	89	989.805
p2_1_100.tif	5	90	989.792
p2_1_100.tif	5	91	993.543
p2_1_100.tif	5	92	991.402
p2_1_100.tif	5	93	991.809
p2_1_100.tif	5	94	993.229
p2_1_100.tif	5	95	994.25
p2_1_100.tif	5	96	992.089
p2_1_100.tif	5	97	992.952
p2_1_100.tif	5	98	999.347
p2_1_100.tif	5	99	995.755
p2_1_100.tif	5	100	986.622
p2_101_200.tif	5	101	982.604
p2_101_200.tif	5	102	975.032
p2_101_200.tif	5	103	1864.13
p2_101_200.tif	5	104	975.665
p2_101_200.tif	5	105	982.626
p2_101_200.tif	5	106	984.995
p2_101_200.tif	5	107	981.996
p2_101_200.tif	5	108	985.681
p2_101_200.tif	5	109	979.314
p2_101_200.tif	5	110	975.924
p2_101_200.tif	5	111	978.409
p2_101_200.tif	5	112	977.73
p2_101_200.tif	5	113	980.41
p2_101_200.tif	5	114	973.133
p2_101_200.tif	5	115	981.895
p2_101_200.tif	5	116	978.986
p2_101_200.tif	5	117	980.267
p2_101_200.tif	5	118	982.932
p2_101_200.tif	5	119	982.732
p2_101_200.tif	5	120	976.583
p2_101_200.tif	5	121	979.124
p2_101_200.tif	5	122	979.251
p2_101_200.tif	5	123	972.667
p2_101_200.tif	5	124	971.336
p2_101_200.tif	5	125	980.007
p2_101_200.tif	5	126	979.324
p2_101_200.tif	5	127	980.063
p2_101_200.tif	5	128	975.299
p2_101_200.tif	5	129	978.117
p2_101_200.tif	5	130	979.392
p2_101_200.tif	5	131	970.269
p2_101_200.tif	5	132	977.761
p2_101_200.tif	5	133	980.438
p2_101_200.tif	5	134	975.598
p2_101_200.tif	5	135	975.98
p2_101_200.tif	5	136	974.447
p2_101_200.tif	5	137	986.672
p2_101_200.tif	5	138	990.559
p2_101_200.tif	5	139	990.913
p2_101_200.tif	5	140	996.473
p2_101_200.tif	5	141	991.576
p2_101_200.tif	5	142	987.785
p2_101_200.tif	5	143	989.201
p2_101_200.tif	5	144	993.821
p2_101_200.tif	5	145	992.024
p2_101_200.tif	5	146	986.318
p2_101_200.tif	5	147	986.262
p2_101_200.tif	5	148	987.698
p2_101_200.tif	5	149	986.982
p2_101_200.tif	5	150	978.911
p2_101_200.tif	5	151	982.789
p2_101_200.tif	5	152	982.447
p2_101_200.tif	5	153	985.524
p2_101_200.tif	5	154	980.555
p2_101_200.tif	5	155	978.69
p2_101_200.tif	5	156	978.484
p2_101_200.tif	5	157	977.298
p2_101_200.tif	5	158	976.021
p2_101_200.tif	5	159	974.299
p2_101_200.tif	5	160	971.529
p2_101_200.tif	5	161	967.696
p2_101_200.tif	5	162	971.204
p2_101_200.tif	5	163	972.36
p2_101_200.tif	5	164	970.407
p2_101_200.tif	5	165	968.793
p2_101_200.tif	5	166	962.065
p2_101_200.tif	5	167	967.498
p2_101_200.tif	5	168	958.024
p2_101_200.tif	5	169	962.02
p2_101_200.tif	5	170	966.429
p2_101_200.tif	5	171	957.674
p2_101_200.tif	5	172	959.908
p2_101_200.tif	5	173	958.679
p2_101_200.tif	5	174	956.516
p2_101_200.tif	5	175	955.188
p2_101_200.tif	5	176	954.935
p2_101_200.tif	5	177	950.27
p2_101_200.tif	5	178	948.503
p2_101_200.tif	5	179	951.909
p2_101_200.tif	5	180	950.651
p2_101_200.tif	5	181	951.298
p2_101_200.tif	5	182	943.52
p2_101_200.tif	5	183	946.402
p2_101_200.tif	5	184	941.551
p2_101_200.tif	5	185	942.194
p2_101_200.tif	5	186	934.733
p2_101_200.tif	5	187	942.82
p2_101_200.tif	5	188	943.497
p2_101_200.tif	5	189	940.559
p2_101_200.tif	5	190	937.053
p2_101_200.tif	5	191	938.436
p2_101_200.tif	5	192	931.764
p2_101_200.tif	5	193	930.301
p2_101_200.tif	5	194	932.266
p2_101_200.tif	5	195	935.371
p2_101_200.tif	5	196	937.604
p2_101_200.tif	5	197	931.1
p2_101_200.tif	5	198	929.975
p2_101_200.tif	5	199	932.733
p2_101_200.tif	5	200	929.221
p2_201_306.tif	5	201	915.827
p2_201_306.tif	5	202	916.509
p2_201_306.tif	5	203	905.937
p2_201_306.tif	5	204	910.852
p2_201_306.tif	5	205	908.558
p2_201_306.tif	5	206	905.041
p2_201_306.tif	5	207	909.792
p2_201_306.tif	5	208	906.9
p2_201_306.tif	5	209	910.182
p2_201_306.tif	5	210	915.137
p2_201_306.tif	5	211	908.047
p2_201_306.tif	5	212	906.626
p2_201_306.tif	5	213	906.457
p2_201_306.tif	5	214	908.564
p2_201_306.tif	5	215	908.645
p2_201_306.tif	5	216	904.534
p2_201_306.tif	5	217	906.47
p2_201_306.tif	5	218	912.811
p2_201_306.tif	5	219	904.334
p2_201_306.tif	5	220	899.293
p2_201_306.tif	5	221	898.472
p2_201_306.tif	5	222	908.532
p2_201_306.tif	5	223	898.227
p2_201_306.tif	5	224	898.494
p2_201_306.tif	5	225	899.801
p2_201_306.tif	5	226	900.506
p2_201_306.tif	5	227	900.748
p2_201_306.tif	5	228	903.83
p2_201_306.tif	5	229	901.516
p2_201_306.tif	5	230	906.363
p2_201_306.tif	5	231	899.489
p2_201_306.tif	5	232	898.19
p2_201_306.tif	5	233	894.962
p2_201_306.tif	5	234	902.24
p2_201_306.tif	5	235	900.841
p2_201_306.tif	5	236	903.477
p2_201_306.tif	5	237	910.74
p2_201_306.tif	5	238	907.298
p2_201_306.tif	5	239	909.939
p2_201_306.tif	5	240	913.047
p2_201_306.tif	5	241	910.083
p2_201_306.tif	5	242	909.191
p2_201_306.tif	5	243	912.226
p2_201_306.tif	5	244	909.803
p2_201_306.tif	5	245	911.657
p2_201_306.tif	5	246	915.799
p2_201_306.tif	5	247	911.021
p2_201_306.tif	5	248	909.71
p2_201_306.tif	5	249	913.549
p2_201_306.tif	5	250	911.678
p2_201_306.tif	5	251	910.272
p2_201_306.tif	5	252	904.057
p2_201_306.tif	5	253	906.444
p2_201_306.tif	5	254	901.348
p2_201_306.tif	5	255	907.616
p2_201_306.tif	5	256	903.754
p2_201_306.tif	5	257	911.258
p2_201_306.tif	5	258	908.121
p2_201_306.tif	5	259	906.714
p2_201_306.tif	5	260	902.804
p2_201_306.tif	5	261	906.485
p2_201_306.tif	5	262	909.153
p2_201_306.tif	5	263	905.707
p2_201_306.tif	5	264	908.951
p2_201_306.tif	5	265	906.077
p2_201_306.tif	5	266	909.864
p2_201_306.tif	5	267	906.466
p2_201_306.tif	5	268	904.307
p2_201_306.tif	5	269	905.217
p2_201_306.tif	5	270	902.981
p2_201_306.tif	5	271	899.663
p2_201_306.tif	5	272	904.538
p2_201_306.tif	5	273	902.833
p2_201_306.tif	5	274	908.746
p2_201_306.tif	5	275	900.167
p2_201_306.tif	5	276	905.337
p2_201_306.tif	5	277	906.109
p2_201_306.tif	5	278	912.07
p2_201_306.tif	5	279	904.602
p2_201_306.tif	5	280	898.723
p2_201_306.tif	5	281	902.096
p2_201_306.tif	5	282	900.046
p2_201_306.tif	5	283	903.375
p2_201_306.tif	5	284	902.005
p2_201_306.tif	5	285	901.078
p2_201_306.tif	5	286	903.327
p2_201_306.tif	5	287	903.119
p2_201_306.tif	5	288	905.295
p2_201_306.tif	5	289	907.855
p2_201_306.tif	5	290	904.201
p2_201_306.tif	5	291	908.392
p2_201_306.tif	5	292	910.456
p2_201_306.tif	5	293	902.273
p2_201_306.tif	5	294	907.141
p2_201_306.tif	5	295	906.675
p2_201_306.tif	5	296	909.736
p2_201_306.tif	5	297	908.082
p2_201_306.tif	5	298	901.075
p2_201_306.tif	5	299	904.364
p2_201_306.tif	5	300	900.974
p2_201_306.tif	5	301	903.725
p2_201_306.tif	5	302	906.482
p2_201_306.tif	5	303	910.69
p2_201_306.tif	5	304	903.761
p2_201_306.tif	5	305	907.179
p2_201_306.tif	5	306	904.174
p2_1_100.tif	6	1	1584.34
p2_1_100.tif	6	2	1583.3
p2_1_100.tif	6	3	1582.59
p2_1_100.tif	6	4	1580.53
p2_1_100.tif	6	5	1585.87
p2_1_100.tif	6	6	1579.98
p2_1_100.tif	6	7	1579.07
p2_1_100.tif	6	8	1586.3
p2_1_100.tif	6	9	1583.7
p2_1_100.tif	6	10	1587.3
p2_1_100.tif	6	11	1589.24
p2_1_100.tif	6	12	1584.63
p2_1_100.tif	6	13	1585.58
p2_1_100.tif	6	14	1584.4
p2_1_100.tif	6	15	1584.45
p2_1_100.tif	6	16	1585.42
p2_1_100.tif	6	17	1582.6
p2_1_100.tif	6	18	1578.55
p2_1_100.tif	6	19	1583.49
p2_1_100.tif	6	20	1579.27
p2_1_100.tif	6	21	1592.89
p2_1_100.tif	6	22	1584.92
p2_1_100.tif	6	23	1153.39
p2_1_100.tif	6	24	1589.8
p2_1_100.tif	6	25	1591.94
p2_1_100.tif	6	26	1601.44
p2_1_100.tif	6	27	1600.25
p2_1_100.tif	6	28	1602.45
p2_1_100.tif	6	29	1601.07
p2_1_100.tif	6	30	1592.6
p2_1_100.tif	6	31	1589.68
p2_1_100.tif	6	32	1589.05
p2_1_100.tif	6	33	1579.97
p2_1_100.tif	6	34	1497.18
p2_1_100.tif	6	35	1054.21
p2_1_100.tif	6	36	1567.49
p2_1_100.tif	6	37	1577.76
p2_1_100.tif	6	38	1596.65
p2_1_100.tif	6	39	1595.47
p2_1_100.tif	6	40	1598.54
p2_1_100.tif	6	41	1599.02
p2_1_100.tif	6	42	1604.78
p2_1_100.tif	6	43	1603.39
p2_1_100.tif	6	44	1601.29
p2_1_100.tif	6	45	1603.02
p2_1_100.tif	6	46	1604.48
p2_1_100.tif	6	47	1598.96
p2_1_100.tif	6	48	1603.95
p2_1_100.tif	6	49	1602.94
p2_1_100.tif	6	50	1603.97
p2_1_100.tif	6	51	1598.43
p2_1_100.tif	6	52	1603.79
p2_1_100.tif	6	53	1591.65
p2_1_100.tif	6	54	1604.15
p2_1_100.tif	6	55	1613.25
p2_1_100.tif	6	56	561.448
p2_1_100.tif	6	57	1355.15
p2_1_100.tif	6	58	1604.27
p2_1_100.tif	6	59	1606.38
p2_1_100.tif	6	60	1609.77
p2_1_100.tif	6	61	1606.73
p2_1_100.tif	6	62	1603.02
p2_1_100.tif	6	63	1545.29
p2_1_100.tif	6	64	1462.7
p2_1_100.tif	6	65	1598.75
p2_1_100.tif	6	66	1600.92
p2_1_100.tif	6	67	1603.44
p2_1_100.tif	6	68	1601.45
p2_1_100.tif	6	69	1593.31
p2_1_100.tif	6	70	1598.32
p2_1_100.tif	6	71	1597.98
p2_1_100.tif	6	72	1596.16
p2_1_100.tif	6	73	1599.49
p2_1_100.tif	6	74	1601.27
p2_1_100.tif	6	75	1600.9
p2_1_100.tif	6	76	1601.53
p2_1_100.tif	6	77	1601.16
p2_1_100.tif	6	78	1600.53
p2_1_100.tif	6	79	1563.67
p2_1_100.tif	6	80	1599.51
p2_1_100.tif	6	81	1603.81
p2_1_100.tif	6	82	1603.68
p2_1_100.tif	6	83	1598.96
p2_1_100.tif	6	84	1600.7
p2_1_100.tif	6	85	1590.75
p2_1_100.tif	6	86	1600.24
p2_1_100.tif	6	87	1600.71
p2_1_100.tif	6	88	1594.94
p2_1_100.tif	6	89	1597.12
p2_1_100.tif	6	90	1598.59
p2_1_100.tif	6	91	1596.92
p2_1_100.tif	6	92	1579.25
p2_1_100.tif	6	93	1597.27
p2_1_100.tif	6	94	1597.85
p2_1_100.tif	6	95	1599.16
p2_1_100.tif	6	96	1603.84
p2_1_100.tif	6	97	1597.64
p2_1_100.tif	6	98	1584
p2_1_100.tif	6	99	1577.3
p2_1_100.tif	6	100	1595.73
p2_101_200.tif	6	101	1593.43
p2_101_200.tif	6	102	1593
p2_101_200.tif	6	103	1583.46
p2_101_200.tif	6	104	1591.55
p2_101_200.tif	6	105	1585.12
p2_101_200.tif	6	106	1588.35
p2_101_200.tif	6	107	1578.26
p2_101_200.tif	6	108	1590.47
p2_101_200.tif	6	109	1584.56
p2_101_200.tif	6	110	1582.68
p2_101_200.tif	6	111	1583.74
p2_101_200.tif	6	112	1589.29
p2_101_200.tif	6	113	1581.98
p2_101_200.tif	6	114	1583.94
p2_101_200.tif	6	115	1589.48
p2_101_200.tif	6	116	1586.61
p2_101_200.tif	6	117	1584.8
p2_101_200.tif	6	118	1583.23
p2_101_200.tif	6	119	1585.32
p2_101_200.tif	6	120	1585.8
p2_101_200.tif	6	121	1584.55
p2_101_200.tif	6	122	1585.53
p2_101_200.tif	6	123	1586.74
p2_101_200.tif	6	124	1591.17
p2_101_200.tif	6	125	1589.4
p2_101_200.tif	6	126	1576.7
p2_101_200.tif	6	127	1580.05
p2_101_200.tif	6	128	1583.6
p2_101_200.tif	6	129	1583.22
p2_101_200.tif	6	130	1584.31
p2_101_200.tif	6	131	1580.26
p2_101_200.tif	6	132	1582.82
p2_101_200.tif	6	133	1583.83
p2_101_200.tif	6	134	1582.39
p2_101_200.tif	6	135	1581.94
p2_101_200.tif	6	136	1582.31
p2_101_200.tif	6	137	1568.2
p2_101_200.tif	6	138	1583.28
p2_101_200.tif	6	139	1581.45
p2_101_200.tif	6	140	1582.51
p2_101_200.tif	6	141	1583.32
p2_101_200.tif	6	142	1577.26
p2_101_200.tif	6	143	1578.96
p2_101_200.tif	6	144	1572.24
p2_101_200.tif	6	145	1578.52
p2_101_200.tif	6	146	1572.35
p2_101_200.tif	6	147	1577.49
p2_101_200.tif	6	148	1574.73
p2_101_200.tif	6	149	1567.8
p2_101_200.tif	6	150	1571.37
p2_101_200.tif	6	151	1575.15
p2_101_200.tif	6	152	1571.86
p2_101_200.tif	6	153	1564.44
p2_101_200.tif	6	154	1555.31
p2_101_200.tif	6	155	1553.24
p2_101_200.tif	6	156	1564.38
p2_101_200.tif	6	157	1556.71
p2_101_200.tif	6	158	1556.24
p2_101_200.tif	6	159	1556.17
p2_101_200.tif	6	160	1553.3
p2_101_200.tif	6	161	1547.25
p2_101_200.tif	6	162	1555.58
p2_101_200.tif	6	163	1547.45
p2_101_200.tif	6	164	1547.94
p2_101_200.tif	6	165	1544.28
p2_101_200.tif	6	166	1540.2
p2_101_200.tif	6	167	1540.02
p2_101_200.tif	6	168	1539.43
p2_101_200.tif	6	169	1538.98
p2_101_200.tif	6	170	1534.16
p2_101_200.tif	6	171	1532.98
p2_101_200.tif	6	172	1529.56
p2_101_200.tif	6	173	1531.9
p2_101_200.tif	6	174	1529.2
p2_101_200.tif	6	175	1524.67
p2_101_200.tif	6	176	1522.97
p2_101_200.tif	6	177	1520.4
p2_101_200.tif	6	178	1511.91
p2_101_200.tif	6	179	1515.52
p2_101_200.tif	6	180	1515.29
p2_101_200.tif	6	181	1512.4
p2_101_200.tif	6	182	1508.35
p2_101_200.tif	6	183	1512.15
p2_101_200.tif	6	184	1505.32
p2_101_200.tif	6	185	1504.2
p2_101_200.tif	6	186	1499.85
p2_101_200.tif	6	187	1497.72
p2_101_200.tif	6	188	1497.03
p2_101_200.tif	6	189	1497.45
p2_101_200.tif	6	190	1492.6
p2_101_200.tif	6	191	1496.17
p2_101_200.tif	6	192	1492.11
p2_101_200.tif	6	193	1491.38
p2_101_200.tif	6	194	1491.4
p2_101_200.tif	6	195	1484.75
p2_101_200.tif	6	196	1480.88
p2_101_200.tif	6	197	1484.47
p2_101_200.tif	6	198	1483.94
p2_101_200.tif	6	199	1483.63
p2_101_200.tif	6	200	1483.52
p2_201_306.tif	6	201	1469.41
p2_201_306.tif	6	202	1477.97
p2_201_306.tif	6	203	1469.1
p2_201_306.tif	6	204	1466.88
p2_201_306.tif	6	205	1465.41
p2_201_306.tif	6	206	1467.55
p2_201_306.tif	6	207	1464.98
p2_201_306.tif	6	208	1466.54
p2_201_306.tif	6	209	1462.08
p2_201_306.tif	6	210	1462.77
p2_201_306.tif	6	211	1465.77
p2_201_306.tif	6	212	1457.38
p2_201_306.tif	6	213	1458.87
p2_201_306.tif	6	214	1460.57
p2_201_306.tif	6	215	1463.14
p2_201_306.tif	6	216	1456.94
p2_201_306.tif	6	217	1455.81
p2_201_306.tif	6	218	1453.15
p2_201_306.tif	6	219	1449.52
p2_201_306.tif	6	220	1451.29
p2_201_306.tif	6	221	1454.47
p2_201_306.tif	6	222	1449.99
p2_201_306.tif	6	223	1449.28
p2_201_306.tif	6	224	1445.62
p2_201_306.tif	6	225	1441.97
p2_201_306.tif	6	226	1449.25
p2_201_306.tif	6	227	1442.27
p2_201_306.tif	6	228	1447.04
p2_201_306.tif	6	229	1447.01
p2_201_306.tif	6	230	1444.98
p2_201_306.tif	6	231	1441.43
p2_201_306.tif	6	232	1444.04
p2_201_306.tif	6	233	1446.27
p2_201_306.tif	6	234	1442.92
p2_201_306.tif	6	235	1436.95
p2_201_306.tif	6	236	1440.74
p2_201_306.tif	6	237	1434.15
p2_201_306.tif	6	238	1448.54
p2_201_306.tif	6	239	1440.22
p2_201_306.tif	6	240	1440.16
p2_201_306.tif	6	241	1447.4
p2_201_306.tif	6	242	1434.78
p2_201_306.tif	6	243	1445.79
p2_201_306.tif	6	244	1434.2
p2_201_306.tif	6	245	1436.05
p2_201_306.tif	6	246	1441.62
p2_201_306.tif	6	247	1439.05
p2_201_306.tif	6	248	1439.35
p2_201_306.tif	6	249	1440.84
p2_201_306.tif	6	250	1432.01
p2_201_306.tif	6	251	1437.78
p2_201_306.tif	6	252	1436.07
p2_201_306.tif	6	253	1435.28
p2_201_306.tif	6	254	1436.85
p2_201_306.tif	6	255	1432.48
p2_201_306.tif	6	256	1432.92
p2_201_306.tif	6	257	1430.56
p2_201_306.tif	6	258	1435.89
p2_201_306.tif	6	259	1438.52
p2_201_306.tif	6	260	1433.43
p2_201_306.tif	6	261	1431.23
p2_201_306.tif	6	262	1432.72
p2_201_306.tif	6	263	1437.63
p2_201_306.tif	6	264	1435.87
p2_201_306.tif	6	265	1433.82
p2_201_306.tif	6	266	1433.16
p2_201_306.tif	6	267	1431.13
p2_201_306.tif	6	268	1429.66
p2_201_306.tif	6	269	1433.53
p2_201_306.tif	6	270	1431.1
p2_201_306.tif	6	271	1435.88
p2_201_306.tif	6	272	1430.64
p2_201_306.tif	6	273	1430.56
p2_201_306.tif	6	274	1430.13
p2_201_306.tif	6	275	1436.16
p2_201_306.tif	6	276	1434.95
p2_201_306.tif	6	277	1426.81
p2_201_306.tif	6	278	1432.27
p2_201_306.tif	6	279	1430.25
p2_201_306.tif	6	280	1433.61
p2_201_306.tif	6	281	1428.72
p2_201_306.tif	6	282	1430.64
p2_201_306.tif	6	283	1424.85
p2_201_306.tif	6	284	1431.39
p2_201_306.tif	6	285	1428.15
p2_201_306.tif	6	286	1431.95
p2_201_306.tif	6	287	1427.23
p2_201_306.tif	6	288	1424.35
p2_201_306.tif	6	289	1428.46
p2_201_306.tif	6	290	1429.25
p2_201_306.tif	6	291	1427.75
p2_201_306.tif	6	292	1427.44
p2_201_306.tif	6	293	1424.8
p2_201_306.tif	6	294	1424.94
p2_201_306.tif	6	295	1430.09
p2_201_306.tif	6	296	1429.72
p2_201_306.tif	6	297	1430.74
p2_201_306.tif	6	298	1424.13
p2_201_306.tif	6	299	1425.76
p2_201_306.tif	6	300	1429.12
p2_201_306.tif	6	301	1428.4
p2_201_306.tif	6	302	1426.1
p2_201_306.tif	6	303	1426.78
p2_201_306.tif	6	304	1422.46
p2_201_306.tif	6	305	1435.72
p2_201_306.tif	6	306	1423.57
p2_1_100.tif	7	1	1562.14
p2_1_100.tif	7	2	1563.92
p2_1_100.tif	7	3	1573.43
p2_1_100.tif	7	4	1562.86
p2_1_100.tif	7	5	1568.82
p2_1_100.tif	7	6	1564.32
p2_1_100.tif	7	7	1568.91
p2_1_100.tif	7	8	1568.96
p2_1_100.tif	7	9	1567.4
p2_1_100.tif	7	10	1570.43
p2_1_100.tif	7	11	1571.48
p2_1_100.tif	7	12	1570.03
p2_1_100.tif	7	13	1577.99
p2_1_100.tif	7	14	1568.32
p2_1_100.tif	7	15	1570.49
p2_1_100.tif	7	16	1563.51
p2_1_100.tif	7	17	1566.11
p2_1_100.tif	7	18	1574.62
p2_1_100.tif	7	19	1571
p2_1_100.tif	7	20	1566.35
p2_1_100.tif	7	21	1577.57
p2_1_100.tif	7	22	1603.06
p2_1_100.tif	7	23	1152.89
p2_1_100.tif	7	24	1595.34
p2_1_100.tif	7	25	1579.3
p2_1_100.tif	7	26	1582.01
p2_1_100.tif	7	27	1586.94
p2_1_100.tif	7	28	1578.24
p2_1_100.tif	7	29	1586.98
p2_1_100.tif	7	30	1580.18
p2_1_100.tif	7	31	1577.79
p2_1_100.tif	7	32	1571.34
p2_1_100.tif	7	33	1570.25
p2_1_100.tif	7	34	1480.49
p2_1_100.tif	7	35	1003.74
p2_1_100.tif	7	36	1534.45
p2_1_100.tif	7	37	1566.42
p2_1_100.tif	7	38	1591.74
p2_1_100.tif	7	39	1588.6
p2_1_100.tif	7	40	1601.8
p2_1_100.tif	7	41	1606.52
p2_1_100.tif	7	42	1613.85
p2_1_100.tif	7	43	1623.19
p2_1_100.tif	7	44	1617.97
p2_1_100.tif	7	45	1618.79
p2_1_100.tif	7	46	1617.55
p2_1_100.tif	7	47	1612.36
p2_1_100.tif	7	48	1606.94
p2_1_100.tif	7	49	1610.42
p2_1_100.tif	7	50	1603.8
p2_1_100.tif	7	51	1602.41
p2_1_100.tif	7	52	1614.2
p2_1_100.tif	7	53	1601.57
p2_1_100.tif	7	54	1610.65
p2_1_100.tif	7	55	1631.17
p2_1_100.tif	7	56	627.114
p2_1_100.tif	7	57	1356.5
p2_1_100.tif	7	58	1630.15
p2_1_100.tif	7	59	1606.58
p2_1_100.tif	7	60	1602.8
p2_1_100.tif	7	61	1598.58
p2_1_100.tif	7	62	1597.23
p2_1_100.tif	7	63	1574.6
p2_1_100.tif	7	64	1566.25
p2_1_100.tif	7	65	1595.11
p2_1_100.tif	7	66	1595.35
p2_1_100.tif	7	67	1592.94
p2_1_100.tif	7	68	1599.91
p2_1_100.tif	7	69	1594.43
p2_1_100.tif	7	70	1595.26
p2_1_100.tif	7	71	1599.55
p2_1_100.tif	7	72	1599.96
p2_1_100.tif	7	73	1597.99
p2_1_100.tif	7	74	1591.91
p2_1_100.tif	7	75	1600.94
p2_1_100.tif	7	76	1602.57
p2_1_100.tif	7	77	1601.15
p2_1_100.tif	7	78	1601.66
p2_1_100.tif	7	79	1606.72
p2_1_100.tif	7	80	1579.66
p2_1_100.tif	7	81	1604.93
p2_1_100.tif	7	82	1597.08
p2_1_100.tif	7	83	1606.17
p2_1_100.tif	7	84	1602.3
p2_1_100.tif	7	85	1600.84
p2_1_100.tif	7	86	1591.3
p2_1_100.tif	7	87	1597.16
p2_1_100.tif	7	88	1598.9
p2_1_100.tif	7	89	1600.24
p2_1_100.tif	7	90	1595.54
p2_1_100.tif	7	91	1599.76
p2_1_100.tif	7	92	1601.29
p2_1_100.tif	7	93	1586.81
p2_1_100.tif	7	94	1601.62
p2_1_100.tif	7	95	1607.86
p2_1_100.tif	7	96	1597.59
p2_1_100.tif	7	97	1594.41
p2_1_100.tif	7	98	1605.42
p2_1_100.tif	7	99	1601.84
p2_1_100.tif	7	100	1584.37
p2_101_200.tif	7	101	1572.47
p2_101_200.tif	7	102	1570.78
p2_101_200.tif	7	103	1568.96
p2_101_200.tif	7	104	1576.51
p2_101_200.tif	7	105	1573.55
p2_101_200.tif	7	106	1572.77
p2_101_200.tif	7	107	1567.9
p2_101_200.tif	7	108	1573.4
p2_101_200.tif	7	109	1573.14
p2_101_200.tif	7	110	1569.87
p2_101_200.tif	7	111	1571.47
p2_101_200.tif	7	112	1576.07
p2_101_200.tif	7	113	1575.67
p2_101_200.tif	7	114	1573.46
p2_101_200.tif	7	115	1568.32
p2_101_200.tif	7	116	1574.28
p2_101_200.tif	7	117	1568.01
p2_101_200.tif	7	118	1577.56
p2_101_200.tif	7	119	1570.05
p2_101_200.tif	7	120	1572.61
p2_101_200.tif	7	121	1569.24
p2_101_200.tif	7	122	1574.7
p2_101_200.tif	7	123	1568.6
p2_101_200.tif	7	124	1567.91
p2_101_200.tif	7	125	1570.78
p2_101_200.tif	7	126	1578.11
p2_101_200.tif	7	127	1571.57
p2_101_200.tif	7	128	1575.43
p2_101_200.tif	7	129	1578.27
p2_101_200.tif	7	130	1568.26
p2_101_200.tif	7	131	1570.86
p2_101_200.tif	7	132	1574.59
p2_101_200.tif	7	133	1572.08
p2_101_200.tif	7	134	1573.03
p2_101_200.tif	7	135	1568.63
p2_101_200.tif	7	136	1570.71
p2_101_200.tif	7	137	1586.01
p2_101_200.tif	7	138	1593.46
p2_101_200.tif	7	139	1591.92
p2_101_200.tif	7	140	1598.04
p2_101_200.tif	7	141	1596.15
p2_101_200.tif	7	142	1591.82
p2_101_200.tif	7	143	1592.51
p2_101_200.tif	7	144	1588
p2_101_200.tif	7	145	1587.83
p2_101_200.tif	7	146	1584.22
p2_101_200.tif	7	147	1583.92
p2_101_200.tif	7	148	1589.88
p2_101_200.tif	7	149	1583.95
p2_101_200.tif	7	150	1581.13
p2_101_200.tif	7	151	1582.54
p2_101_200.tif	7	152	1584.69
p2_101_200.tif	7	153	1587.3
p2_101_200.tif	7	154	1584.25
p2_101_200.tif	7	155	1584.9
p2_101_200.tif	7	156	1581.45
p2_101_200.tif	7	157	1577.35
p2_101_200.tif	7	158	1575.66
p2_101_200.tif	7	159	1575.3
p2_101_200.tif	7	160	1579.4
p2_101_200.tif	7	161	1572.6
p2_101_200.tif	7	162	1577.69
p2_101_200.tif	7	163	1576.97
[truncated: 4,733 more rows]

## Sheet: Sheet2
Frame	s	1	2	3	5	6	8	9	10	11	12	15	17	18	19	22																												Frame	1	2	3	5	6
1	0	1261.04	1946.4	2330.85	973.413	1584.34	1815.08	1197.83	1198.1	1189.53	1649.8	2068.73	1594.3	1759.93	1535.19	1319.27																												1	100	100	100	100	100
2	0.1	1255.32	1945.84	2329.16	973.04	1583.3	1825.66	1195.49	1207.22	1193.82	1645.92	2067.39	1603.18	1755.17	1523.32	1322.28																												2	99.5464	99.9713	99.9275	99.9618	99.9347
3	0.2	1256.39	1942.58	2325.97	973.341	1582.59	1826.74	1198.47	1203.84	1195.6	1646.92	2064.62	1602	1753.14	1540.13	1324.61																												3	99.6317	99.8037	99.7908	99.9926	99.8901
4	0.3	1258.64	1946.27	2328.08	970.104	1580.53	1822.38	1195.41	1199.71	1195.72	1648.9	2065.83	1594.2	1756.94	1534.08	1312.83																												4	99.8103	99.9932	99.8813	99.6601	99.7595
5	0.4	1252.66	1948.58	2336.96	973.946	1585.87	1830.17	1193.14	1201.54	1189.61	1647.11	2067.86	1605.34	1764.87	1528.63	1322.06																												5	99.3355	100.112	100.262	100.055	100.097
6	0.5	1262.03	1948.08	2333.09	971.07	1579.98	1828.74	1195.61	1204.07	1190.72	1644.27	2070.26	1597.57	1759.35	1537.28	1316.09																												6	100.079	100.086	100.096	99.7593	99.7253
7	0.6	1254.09	1948.82	2326.45	978.48	1579.07	1828.81	1194.28	1203.28	1194.77	1655.65	2060.69	1602.93	1758.93	1534.13	1319.53																												7	99.4491	100.125	99.8113	100.521	99.6674
8	0.7	1255.68	1948.71	2332.71	977.14	1586.3	1828.46	1195.83	1208.72	1194.54	1644.19	2067	1611.44	1762.57	1538.14	1333.18																												8	99.575	100.119	100.08	100.383	100.124
9	0.8	1261.8	1948.38	2333.14	970.17	1583.7	1826.62	1204.87	1205.84	1195.68	1651.9	2065.58	1604.32	1767.52	1537.16	1324.63																												9	100.061	100.102	100.098	99.6669	99.9599
10	0.9	1256.68	1951.58	2336	977.435	1587.3	1837.49	1198.23	1216.31	1195.12	1649.57	2076.76	1603.01	1766.75	1532.68	1325.15																												10	99.6545	100.266	100.221	100.413	100.187
11	1	1259.4	1943.46	2337.03	972.275	1589.24	1836.49	1206.84	1202.41	1194.15	1648.22	2065.63	1609.41	1760.5	1536.7	1318.73																												11	99.8706	99.8492	100.265	99.8831	100.309
12	1.1	1262.59	1953.74	2336.15	980.85	1584.63	1835.85	1197.69	1205.94	1192.87	1653.72	2073.55	1603.05	1757.1	1537.49	1329.55																												12	100.123	100.377	100.227	100.764	100.018
13	1.2	1261.21	1951.59	2339.7	974.733	1585.58	1836.92	1201.26	1213.82	1196.92	1651.76	2067.99	1609.7	1764.88	1534.93	1321.66																												13	100.014	100.267	100.38	100.136	100.079
14	1.3	1263.39	1953.37	2336.68	969.642	1584.4	1829.37	1201.23	1204.09	1197.91	1650.56	2070.89	1601.88	1766.06	1539.04	1322.26																												14	100.187	100.358	100.25	99.6126	100.004
15	1.4	1256.98	1947.31	2333.11	973.872	1584.45	1841.28	1198.66	1206.92	1188.8	1654.68	2069.66	1604.85	1759.87	1540.75	1323.74																												15	99.6786	100.047	100.097	100.047	100.007
16	1.5	1261.37	1954.77	2332.28	974.829	1585.42	1835.55	1191.95	1205.36	1197.52	1649.97	2069.22	1601.19	1762.37	1538.68	1321.76																												16	100.027	100.43	100.062	100.145	100.069
17	1.6	1260.65	1949.92	2332.33	975.399	1582.6	1821.45	1188.95	1199.58	1192.61	1652.23	2064.94	1605.56	1754.41	1536	1324.32																												17	99.9692	100.181	100.063	100.204	99.8905
18	1.7	1256.7	1948.52	2332.82	974.532	1578.55	1833.49	1195.14	1200.75	1198.92	1647.74	2071.31	1597.92	1757.13	1533.59	1330.07																												18	99.6562	100.109	100.084	100.115	99.6348
19	1.8	1264.21	1955.45	2337	979.586	1583.49	1836.22	1196.74	1209.61	1189.91	1643.21	2067	1604.51	1757.8	1532.16	1323.33																												19	100.252	100.465	100.264	100.634	99.9465
20	1.9	1266.23	1962.08	2338.39	979.152	1579.27	1843.64	1201.52	1209.66	1193.48	1651.05	2075.04	1600.56	1758.06	1538.2	1322.31																												20	100.412	100.806	100.324	100.59	99.68
21	2	1270.44	1964.63	2346.81	977.864	1592.89	1858.69	1202.36	1215.9	1191.05	1655.92	2072.73	1598.78	1758.51	1540.8	1325.84																												21	100.745	100.937	100.685	100.457	100.54
22	2.1	1272.8			981.687	1584.92	1903.97	1196.32	1193.76		1655.8	2107.24	1623.49	1760.57	1539.27	1317.38																												22	100.933			100.85	100.037
23	2.2																																											23
24	2.3				992.779	1589.8	1899.27	1207.36	1199.16	1185.05	1661.17	2110.21		1769.84	1536.66	1336.87																												24				101.989	100.345
25	2.4	1268.64	1963.55	2356.1	983.311	1591.94	1861.09	1210.95	1218.8	1197.11	1671.3	2091.52		1768.6	1537.19	1329.48																												25	100.603	100.881	101.083	101.017	100.48
26	2.5	1258.2	1955.25	2349.15	976.352	1601.44	1859.84		1213.42	1201.14	1665.86	2078.83	1613.87	1761.94	1526.59	1323.25																												26	99.7752	100.455	100.785	100.302	101.08
27	2.6	1261.99	1954.91	2345.45	975.375	1600.25	1856.11	1203.41	1210.15	1193.61	1659.78	2074.44	1611.39	1760.55	1537.82	1322.46																												27	100.075	100.437	100.626	100.202	101.004
28	2.7	1259.96	1954.93	2348.73	973.158	1602.45	1849.33	1203.02	1208.35	1207.35	1660.28	2079.26	1590.77	1757.88	1537.95	1318.77																												28	99.9148	100.438	100.767	99.9738	101.143
29	2.8	1263.43	1953.7	2348.95	976.063	1601.07	1855.5	1204.51	1211.33	1202.68	1660.69	2079.01	1589.16	1757.06	1542.13	1324.55																												29	100.19	100.375	100.777	100.272	101.056
30	2.9	1255.72	1954.39	2343.91	980.489	1592.6	1848.91	1199.26	1210.77	1202.65	1649.74	2079.66	1580.64	1761.29	1538.06																													30	99.5785	100.411	100.56	100.727	100.521
31	3	1262.15	1952.22	2343.91	979.237	1589.68	1849.49	1197.95	1206.29	1200.12	1658.16	2074.42	1577.99	1741.16	1520.84																													31	100.089	100.299	100.56	100.598	100.337
32	3.1	1258.91	1949.24	2343.68	979.441	1589.05	1842.37	1202.77	1206.72	1194.8	1650.28	2067.97		1759.02	1546.84																													32	99.8315	100.146	100.551	100.619	100.298
33	3.2	1264.28	1955.24	2347.31	969.283	1579.97	1854.51	1204.74	1199.2	1200.88	1650.28	2072.81	1580.1	1766.27	1542.5																													33	100.257	100.454	100.706	99.5758	99.7245
34	3.3																																											34
35	3.4																																											35
36	3.5	1271.17	1992.98		962.064		1890.57																																					36	100.804	102.393		98.8341
37	3.6		1950.38		984.995	1577.76	1827.08	1206.46	1211.44	1201.5	1652.64	2086.88	1587.04	1768.12	1548.79																													37		100.204		101.19	99.5848
38	3.7	1263.95	1971.57	2360.33	996.855	1596.65	1854.6	1211.25	1225.78	1202.86	1670.29	2098.54	1602.68	1776.35	1559.27	1326.71																												38	100.231	101.293	101.265	102.408	100.778
39	3.8	1267.49	1972.98	2356.89	993.096	1595.47	1863.32	1210.37	1218.33	1202.1	1671.54	2092.15	1599.11	1767.68	1565.65	1331.95																												39	100.512	101.365	101.117	102.022	100.703
40	3.9	1265.01	1982.06	2356.55	996.171	1598.54	1864.96	1208.89	1218.34	1209.46	1670.83	2093.15	1598.59	1760.56	1560.76	1333.87																												40	100.315	101.832	101.103	102.338	100.897
41	4	1263.5	1990.22	2355.78	991.011	1599.02	1873.17	1203.85	1217.65	1207.96	1672.47	2103.87	1593.69	1769.29	1562.15	1328.38																												41	100.195	102.251	101.07	101.808	100.927
42	4.1	1272.24	1991.39	2363.3	993.139	1604.78	1883.1	1202.66	1228.23	1210.1	1671.9	2113.47	1600.09	1777.68	1565.25	1343.81																												42	100.888	102.311	101.392	102.027	101.291
43	4.2	1269.29	1992.68	2359.14	1001.24	1603.39	1887.17	1208.49	1228.32	1219.07	1685.48	2110.58	1606.41	1782.23	1557.35	1334.14																												43	100.655	102.378	101.214	102.858	101.203
44	4.3	1274.04	1989.27	2361.42	996.205	1601.29	1875.76	1197.81	1218.72	1212.84	1673.92	2115.22	1604.1	1778.87	1561.6	1339.46																												44	101.032	102.202	101.311	102.342	101.07
45	4.4	1267.15	1991.06	2365.77	998.445	1603.02	1879.93	1208.81	1222.75	1218.03	1676.96	2118.35	1598.9	1782.51	1550.52	1335.88																												45	100.485	102.295	101.498	102.572	101.179
46	4.5	1269.26	1985.87	2348.81	1006.67	1604.48	1876.91	1206.06	1219.53	1222.01	1677.71	2116.1	1598.09	1785.57	1554.31	1327.97																												46	100.652	102.028	100.77	103.416	101.271
47	4.6	1273.44	1981.87	2352.74	998.126	1598.96	1877.19	1208.94	1221.87	1220.76	1678.95	2117.68	1603.47	1787.66	1562.58	1336.19																												47	100.984	101.822	100.939	102.539	100.923
48	4.7	1264.71	1985.43	2352.83	1002.16	1603.95	1880.16	1211.61	1224.72	1215.37	1676.35	2115.23	1598.6	1782.87	1561.08	1333.09																												48	100.292	102.005	100.943	102.953	101.238
49	4.8	1276.19	1985.88	2357.15	996.422	1602.94	1868.1	1204.11	1219.66	1218.58	1673.72	2114.49	1606.6	1775.33	1566.13	1331.38																												49	101.202	102.028	101.128	102.364	101.174
50	4.9	1270.95	1982.26	2350.68	995.055	1603.97	1866.12	1209.69	1217.98	1211.7	1673.39	2109.6	1601.81	1785.39	1558.14	1333.62																												50	100.786	101.843	100.851	102.223	101.239
51	5	1266.45	1982.39	2354.18	997.667	1598.43	1866.96	1202.41	1221.39	1217.43	1674.33	2103.12	1596.65	1778.89	1560.95	1325.97																												51	100.429	101.849	101.001	102.492	100.89
52	5.1	1269.48	1985.38	2362.72	999.967	1603.79	1878.25	1213.72	1220.8	1210.25	1674.01	2107.77	1592.17	1777.58	1549.79	1339.5																												52	100.669	102.003	101.368	102.728	101.228
53	5.2	1271.43	1980.43	2351.68	1003.23	1591.65	1858.71	1212.76	1220.74	1211.46	1672.44	2106.42	1598.32	1770.74	1555.04	1326.64																												53	100.824	101.748	100.894	103.063	100.462
54	5.3	1275.17	1981.03	2365.74	1004.47	1604.15	1875.39	1220.29	1220.51	1211.63	1678.5	2112.52	1612.4	1778.78	1571.4	1335.26																												54	101.121	101.779	101.497	103.19	101.251
55	5.4					1613.25			1230.71		1696.48			1798.36	1576.36	1346.38																												55					101.825
56	5.5																																											56
57	5.6		1957.51																																									57
58	5.7					1604.27		1212.97	1216.19		1681.03			1784.75	1570.05																													58					101.258
59	5.8	1277.91			1004.9	1606.38	1895.55	1209.33	1214.77	1207.95	1671.06	2120.84	1614.51	1768.58	1556.7	1340.54																												59	101.338			103.234	101.391
60	5.9	1261.02	1982.02	2366.6	994.22	1609.77	1888.06	1214.46	1221.65	1212.28	1667.27	2107.17	1599.99	1767.94	1556.83	1322.52																												60	99.9991	101.83	101.534	102.138	101.605
61	6	1261.47	1981.6	2364.39	988.065	1606.73	1879.63	1209.1	1222.88	1214.11	1667.58	2108.02	1593.34	1767.93	1551.91	1319.86																												61	100.035	101.809	101.439	101.505	101.414
62	6.1	1261.25	1979.03	2353.1	994.224	1603.02	1867.33	1212.77	1217.04	1215.47	1660.13	2101.36	1595.22	1756.5	1557.47	1310.06																												62	100.017	101.676	100.955	102.138	101.179
63	6.2		1970.85	2343.59	991.022		1856.26	1202.91	1214.3	1213.76	1657.88	2095.08	1587.2	1761.08	1546.36																													63		101.256	100.547	101.809
64	6.3	1264.69	1976.75	2347.92	1004.87		1858.37	1209.07	1211.98	1212.92	1666.66	2102.42	1599	1768.71	1556.31	1317.05																												64	100.289	101.559	100.732	103.232
65	6.4	1262.68	1967.04	2352.7	994.233	1598.75	1874.47	1218.41	1222.7	1209.78	1665.21	2089.33	1595.08	1768.51	1553.51	1321.33																												65	100.131	101.06	100.938	102.139	100.91
66	6.5	1264.73	1981.58	2358.74	992.702	1600.92	1865.67	1199.28	1211.85	1210.19		2095.22	1595.4	1772.85	1560.59	1322.36																												66	100.293	101.808	101.197	101.982	101.047
67	6.6	1257.5	1972.02	2351.07	991.246	1603.44	1867.75	1210.24	1213.5	1219.41	1668.75	2101.23	1592.7	1763.72	1556	1325.41																												67	99.7197	101.316	100.867	101.832	101.206
68	6.7	1269.77	1972.35	2338.86	999.31	1601.45	1859.78	1211.79	1219.64	1210.36	1663.6	2102.55	1598.03	1767.39	1559.71	1323.55																												68	100.693	101.333	100.344	102.66	101.08
69	6.8	1263.88	1974.92	2353.37	995.354	1593.31	1866.27	1206.03	1213.49	1209.11	1656.45	2103.45	1596.12	1762.8	1567.43	1323.41																												69	100.225	101.465	100.966	102.254	100.566
70	6.9	1271.17	1976	2346.82	995.006	1598.32	1872.78	1210.06	1218.05	1209.76	1667.97	2104.24	1593.48	1762.41	1554.75	1321.56																												70	100.804	101.521	100.685	102.218	100.882
71	7	1266.88	1981.45	2354.06	999.295	1597.98	1873.15	1207.88	1214.77	1207.34	1659.52	2100.49	1595.1	1761.65	1558.04	1327.45																												71	100.463	101.801	100.996	102.659	100.861
72	7.1	1265.42	1978.91	2353.49	993.326	1596.16	1873.13	1206.87	1215.91	1203.67	1659.08	2100.49	1594.72	1765.29	1558.55	1329.97																												72	100.347	101.67	100.972	102.046	100.746
73	7.2	1267.27	1978.45	2351.45	996.356	1599.49	1873.81	1207.48	1210.87	1203.81	1658.51	2099.22	1598.61	1765.59	1554.32	1323.28																												73	100.494	101.646	100.884	102.357	100.957
74	7.3	1268.73	1984.21	2360.02	995.929	1601.27	1877.7	1215.27	1216.42	1209.48	1665.16	2098.97	1589	1748.28	1558.09	1319.68																												74	100.61	101.943	101.252	102.313	101.069
75	7.4	1272.23	1976.34	2349.01	997.504	1600.9	1869.96	1212.83	1209.61	1207.12	1659.89	2101.17	1595.11	1767.5	1561.95	1321.43																												75	100.888	101.538	100.779	102.475	101.045
76	7.5	1267.54	1972.91	2353.03	1000.66	1601.53	1864.89	1205.75	1213.99	1204.78	1668.01	2106.32	1604.09	1769.57	1553.96	1327.09																												76	100.516	101.362	100.952	102.799	101.085
77	7.6	1265.33	1970.79	2358.59	993.503	1601.16	1872.97	1205.51	1215.72	1209.93	1658.7	2108.42	1602.81	1764.07	1556.64	1324.75																												77	100.341	101.253	101.19	102.064	101.062
78	7.7	1271.07	1976.98	2353.68	984.067	1600.53	1873.31	1211.31	1216.6	1202.45	1665.47	2105.54	1602.29	1769.5	1556.75	1323.75																												78	100.795	101.571	100.98	101.095	101.022
79	7.8	1268.48		2356.1	993.073		1869.24	1209.68	1213.79	1209.82	1666.08	2109.77	1602.96	1765.35	1552.51	1329.26																												79	100.591		101.083	102.02
80	7.9	1266.61	1976.28		995.828	1599.51	1849.69	1208.17	1195.12		1665.18	2110.89	1600.41	1771.08	1560.68	1332.6																												80	100.442	101.535		102.303	100.958
81	8	1272.45	1972.66		993.121	1603.81	1864.44	1209.35	1215.48	1208.75	1665.19	2091.22	1595.9	1766.43	1559.62	1329.04																												81	100.905	101.349		102.025	101.229
82	8.1	1271.88	1976.49	2351.79	986.479	1603.68	1873.8	1204.8	1218.2	1207.81	1658.9	2093.03	1592.46	1768.55		1327.09																												82	100.86	101.546	100.899	101.342	101.221
83	8.2	1255.06	1976.18		990.617	1598.96	1869.62	1203.91	1214.78	1215.95		2110.65	1602.1			1331.11																												83	99.5259	101.53		101.767	100.923
84	8.3	1266.86	1977.83	2345.63	994.384	1600.7	1873.96	1212.1	1218.73	1210.66	1659.97	2105.61	1609.92	1761.87	1556.56	1324.33																												84	100.462	101.615	100.634	102.154	101.033
85	8.4	1268.5	1979.38	2355.09	996.134	1590.75	1879.34	1211.57	1222.77	1205.73	1662.08	2107.08			1558.79	1329.99																												85	100.592	101.694	101.04	102.334	100.405
86	8.5	1264.51	1979.37	2357.04	1001.76	1600.24	1838.22	1214.02		1206.88	1666.83	2103.96		1765.67	1557.47	1326.91																												86	100.276	101.694	101.124	102.912	101.004
87	8.6	1269.27	1975.42	2351.31	989.091	1600.71	1861.59	1215.54	1230.67	1204.9	1663.94	2104.06	1600.82	1758.87	1562.05	1323.23																												87	100.653	101.491	100.878	101.611	101.034
88	8.7	1268.89	1978.04	2348.43	993.946	1594.94	1867.03	1210.59	1225.24	1213.42	1666.32	2099.84	1591.78	1766.88	1561.28	1323.73																												88	100.623	101.626	100.754	102.109	100.669
89	8.8	1269.69	1975.32	2352.92	989.805	1597.12	1862.99	1206.11	1230.29	1209.88	1665.56	2109.34	1599.15	1766.32	1559.19	1329.09																												89	100.687	101.486	100.947	101.684	100.807
90	8.9	1269.33	1969.1	2349.04	989.792	1598.59	1867.86	1205.52	1226.1	1203.47	1671.52	2102.53	1599.98	1767.56	1560.99	1328.21																												90	100.658	101.166	100.78	101.683	100.899
91	9	1271.1	1968.01	2351.67	993.543	1596.92	1861.78	1209.99	1227.08	1205.97	1664.52	2109.5	1592.97	1757.01	1561.65	1317.87																												91	100.798	101.11	100.893	102.068	100.794
92	9.1	1269.69	1969	2356.01	991.402	1579.25	1862.41	1208.23	1229.26		1668.4	2108.95	1600.41	1768.56	1565.11	1323.29																												92	100.686	101.161	101.08	101.848	99.6789
93	9.2	1269.14	1969.34	2353.12	991.809	1597.27	1866.46	1208.38	1230.44	1205.22	1657.12	2102.08	1599.07	1766	1564.05	1323.64																												93	100.643	101.179	100.956	101.89	100.816
94	9.3	1275.85	1981.91	2347.92	993.229	1597.85	1860.57		1224.47	1206.86	1665.12	2101.89	1605.71	1769.2	1560.23	1336.76																												94	101.175	101.824	100.733	102.036	100.853
95	9.4	1260.47	1974.86	2349.78	994.25	1599.16	1861.27		1232.42	1204.62	1661.08	2104.05	1598.83	1766.09	1553.17	1333.4																												95	99.9554	101.462	100.812	102.141	100.936
96	9.5		1965.14	2351.71	992.089	1603.84	1862.91	1211.06	1226.45	1208.68	1665.59	2103.82	1597.53	1764.62	1554.67	1319.65																												96		100.963	100.895	101.919	101.231
97	9.6	1270.09	1975.75	2352.13	992.952	1597.64	1860.85	1213.66	1227.75	1207.34	1660.14	2108.52	1597.93	1763.47	1555.44	1334.4																												97	100.718	101.508	100.913	102.007	100.84
98	9.7	1268.83	1975.29	2352.14	999.347	1584	1876.71	1206.31		1204.84	1657.18	2103.46	1600.47	1769.01	1551.64	1327.4																												98	100.618	101.484	100.913	102.664	99.9788
99	9.8	1267.04	1978.23	2351.8	995.755	1577.3	1873.53	1202.77	1236.86	1207.44	1668.39	2106.14	1597.14	1762.95	1557.8	1324.95																												99	100.476	101.635	100.899	102.295	99.5561
100	9.9	1268.43	1966.18		986.622	1595.73	1855.26	1211.63	1220.9		1665.33	2100.44	1599.26	1773.17	1551.02	1325.13																												100	100.586	101.016		101.357	100.719
101	10	1264.72	1960.74	2356.13	982.604	1593.43	1885.64	1210.97			1661.3	2089	1612.57	1772.86	1539.98	1322.79																												101	100.293	100.737	101.084	100.944	100.574
102	10.1	1261.75	1949.46	2355.72	975.032	1593	1878.65	1202.93	1203.94	1210.52	1652.8	2095.16	1605.6	1771.87	1538.61	1317.52																												102	100.057	100.157	101.067	100.166	100.547
103	10.2	1260.66	1957.08	2358.74		1583.46	1874.95	1202.48	1202.98	1207.05	1658.77	2088.54	1608.03	1764.63	1541.48	1325.11																												103	99.9699	100.549	101.197		99.945
104	10.3	1259.84	1961.32	2355.36	975.665	1591.55	1888.2	1201.82	1209.82	1206.49	1653.41	2089.46	1609.03	1765.59	1539.41	1322.19																												104	99.9056	100.767	101.052	100.231	100.456
105	10.4	1260.56	1962.66	2361.31	982.626	1585.12	1883.46	1205.97	1200.57	1209.19	1644.47	2091.77	1610.01	1759.02	1531.94	1320.83																												105	99.9626	100.835	101.307	100.946	100.05
106	10.5	1260.4	1957.65	2356.41	984.995	1588.35	1872.52	1203.69	1202.92	1203.22		2087.82	1611.88	1774.34	1543.12	1332.49																												106	99.9494	100.578	101.097	101.19	100.253
107	10.6	1261.49	1963.38	2355.32	981.996	1578.26	1879.34	1205.37	1207.28	1204.37	1646.77	2088.79	1607.42	1770.54	1545.16	1327.78																												107	100.036	100.873	101.05	100.882	99.6163
108	10.7	1263.97	1956.17	2352.02	985.681	1590.47	1881.12	1202.93	1200	1199.13	1657.79	2089.7	1605.96	1758.96	1533.63	1328.41																												108	100.233	100.502	100.908	101.26	100.387
109	10.8	1266.36	1962.9	2349.3	979.314	1584.56	1876.34	1202.87	1201.37	1207.51	1663.35	2100.81	1616.55	1762.18	1530.11	1320.53																												109	100.422	100.848	100.791	100.606	100.014
110	10.9	1259.17	1957.78	2351.33	975.924	1582.68	1879.85	1201.17	1204.22	1206.23	1655.6	2099.48	1607.53	1769.46	1536.14	1328.91																												110	99.8517	100.585	100.879	100.258	99.8954
111	11	1266.15	1955.58	2360.75	978.409	1583.74	1879.23	1194.38	1206.33	1205.45	1656.03	2100.58	1609.8	1771.63	1538.41	1321																												111	100.406	100.472	101.283	100.513	99.9622
112	11.1	1268.5	1956.58	2358.58	977.73	1589.29	1874.86	1206.16	1206.01	1200.7	1653.81	2097.03	1608.28	1764.55	1542.17	1323.39																												112	100.592	100.523	101.19	100.444	100.313
113	11.2	1269.48	1957.07	2357.28	980.41	1581.98	1880.62	1198.97	1205.11	1203.89	1654.32	2098.86	1610.5	1759.45	1531.47	1319.82																												113	100.669	100.548	101.134	100.719	99.8512
114	11.3	1262.36	1957.5	2351.33	973.133	1583.94	1879.23	1201.81	1202.36	1205.01	1653.96	2101.24	1608.21	1765.05	1534.96	1324.66																												114	100.105	100.57	100.879	99.9713	99.9747
115	11.4	1264.01	1952.39	2362.31	981.895	1589.48	1872.48	1200.5	1205.22	1203.17	1652.77	2081.57	1614.97	1759.66	1537.8	1315.76																												115	100.236	100.308	101.35	100.871	100.325
116	11.5	1265.07	1957.62	2354.54	978.986	1586.61	1881.99	1197.41	1204.3	1197.23	1653.66	2091.71	1605.59	1762.26	1539.39	1322.65																												116	100.32	100.576	101.017	100.573	100.144
117	11.6	1256.5	1957.75	2354.18	980.267	1584.8	1881.24	1201.55	1204.27	1197.83	1661.1	2087.23	1614.98	1760.65	1545.07	1328.11																												117	99.6402	100.583	101.001	100.704	100.029
118	11.7	1260.73	1958.72	2354.63	982.932	1583.23	1879.1	1206.57	1210.59	1197.53	1655.28	2088.01	1610.67	1757.77	1542.3	1323.47																												118	99.9758	100.633	101.02	100.978	99.9301
119	11.8	1260.71	1958.75	2351.71	982.732	1585.32	1877.25	1199.41	1211.79	1198.34	1653.75	2085.63	1607.69	1756.86	1528.96	1321.77																												119	99.9742	100.634	100.895	100.957	100.062
120	11.9	1260.06	1955.46	2358.04	976.583	1585.8	1876.37	1204.59	1207.92	1206.6	1652.7	2086.49	1612.62	1761.92	1528.11	1325.06																												120	99.9223	100.466	101.167	100.326	100.092
121	12	1271.22	1954.34	2362.51	979.124	1584.55	1877.9	1203	1202.66	1207.54	1654.65	2086.06	1607.61	1765.27	1535.3	1323.12																												121	100.808	100.408	101.359	100.587	100.013
122	12.1	1263.66	1957.55	2354.63	979.251	1585.53	1874.35	1203.64	1201.36	1199.04	1654.13	2097.88	1603.48	1762.38	1542.88	1318.93																												122	100.208	100.573	101.02	100.6	100.075
123	12.2	1263.11	1960.77	2358.17	972.667	1586.74	1875.95	1205.22	1209.53	1205.38	1659.67	2088.83	1616.23	1760.8	1534.57	1327.55																												123	100.165	100.738	101.172	99.9234	100.152
124	12.3	1264.23	1950.76	2350.7	971.336	1591.17	1879.86	1199.07	1207.68	1201.16	1658.4	2086.97	1609.79	1764.37	1543.12	1319.71																												124	100.254	100.224	100.852	99.7867	100.431
125	12.4	1265.26	1953.61	2352.34	980.007	1589.4	1879.77	1193.07	1204.37	1200.1	1659.01	2088.46	1611.08	1758.03	1538.48	1319.99																												125	100.335	100.371	100.922	100.677	100.319
126	12.5	1261.5	1950.65	2360.13	979.324	1576.7	1879.39	1209.53	1205.46	1203.68	1660.07	2090.21	1615.56	1769.15	1536.76	1320.46																												126	100.037	100.218	101.256	100.607	99.5178
127	12.6	1262.77	1949.69	2356.24	980.063	1580.05	1872	1213.3	1208.72	1208.34	1658.85	2091.17	1610.19	1763.24	1533.39	1325.81																												127	100.138	100.169	101.089	100.683	99.7293
128	12.7	1265.38	1954.52	2356.08	975.299	1583.6	1872.26	1207.01	1203.79	1198.5	1653.52	2088.12	1608.3	1765.21	1536.69	1321.9																												128	100.344	100.417	101.083	100.194	99.9535
129	12.8	1267.03	1951.86	2348.32	978.117	1583.22	1878.51	1207.44	1204.82	1203.31	1656.08	2086.46	1614.88	1754	1534.13	1321.89																												129	100.475	100.28	100.75	100.483	99.9297
130	12.9	1260.55	1946.06	2351.32	979.392	1584.31	1878.77	1202.91	1200.59	1203.33	1661.69	2087.45	1609.85	1768.48	1541.23	1327.41																												130	99.9615	99.9826	100.878	100.614	99.9986
131	13	1263.38	1950.29	2358.33	970.269	1580.26	1873.79	1196.66	1205.66	1196.81	1654.35	2074.25	1619.68	1770.91	1534.85	1317.27																												131	100.186	100.2	101.179	99.6771	99.743
132	13.1	1262.27	1950.78	2357.17	977.761	1582.82	1878.86	1199.4	1203.2	1198.79	1661.26	2082.94	1611.36	1763.81	1538.37	1317.64																												132	100.098	100.225	101.129	100.447	99.9041
133	13.2	1260.78	1954.29	2357.76	980.438	1583.83	1877.55	1199.56	1207.17	1199.34	1657.65	2085.06	1614.86	1764.38	1540.38	1316.8																												133	99.9794	100.405	101.154	100.722	99.9679
134	13.3	1261.84	1952.5	2352.76	975.598	1582.39	1874.4	1201.44	1202.72	1199.79	1656.79	2090.68	1615	1769.92	1536.93	1310.93																												134	100.064	100.313	100.94	100.225	99.8769
135	13.4	1256.95	1949.53	2350.55	975.98	1581.94	1871.21	1202.36	1209.92	1195.79	1656.64	2090.53	1607.92	1764.83	1535.56	1319.73																												135	99.6761	100.161	100.845	100.264	99.8487
136	13.5	1260.59	1942.9	2350.63	974.447	1582.31	1876.52	1194.37	1199.53	1205.68	1658.79	2087.56	1609	1753.59	1537.68	1316.45																												136	99.9646	99.82	100.849	100.106	99.8723
137	13.6	1273.38	1956.85	2352.75	986.672	1568.2		1204.92	1210.24	1205.59	1664.19	2096.71	1601.09	1759.11	1550.75	1316.25																												137	100.979	100.537	100.94	101.362	98.9818
138	13.7	1269.26	1960.92	2351.1	990.559	1583.28	1851.68	1204.91	1209.32	1200.32	1663.81	2100.56	1596.15	1756.62	1548.49	1331.32																												138	100.652	100.746	100.869	101.761	99.9331
139	13.8	1261.89	1955.66	2354.01	990.913	1581.45	1854.26	1204.88	1208.96	1199.56	1664.36	2095.65	1597.03	1757.3	1557.64	1326.56																												139	100.067	100.476	100.994	101.798	99.818
140	13.9	1262.26	1958.86	2346.9	996.473	1582.51	1856.65	1200.16	1209.46	1204.29	1663.18	2096.19	1599.69	1753.64	1553.17	1311.53																												140	100.097	100.64	100.689	102.369	99.8848
141	14	1266.95	1961.11	2337.79	991.576	1583.32	1851.79	1200.65	1205.38	1205.61	1661.67	2094.54	1597.63	1754.98	1561.03	1316.36																												141	100.469	100.756	100.298	101.866	99.9358
142	14.1	1268.76	1961.22	2344.41	987.785	1577.26	1851.57	1205.64	1204.7	1200.97	1661.84	2091.5	1594.64	1753.59	1556.56	1319.98																												142	100.612	100.762	100.582	101.476	99.5534
143	14.2	1264.15	1952.24	2345.74	989.201	1578.96	1854.16	1204.07	1207.64	1202.95	1662.24	2098.61	1595.42	1758.23	1552.76	1317.26																												143	100.247	100.3	100.639	101.622	99.6604
144	14.3	1263.4	1953.65	2345.86	993.821	1572.24	1853.34	1201.01	1206.82	1205.72	1663.48	2099.41	1593.82	1763.71	1554.73	1302.01																												144	100.187	100.373	100.644	102.097	99.2366
145	14.4	1262.59	1947.07	2342.95	992.024	1578.52	1851.68	1201.16	1204.74	1202.23	1661.05	2093.19	1605.24	1755.75	1552.85	1310.77																												145	100.124	100.034	100.519	101.912	99.6328
146	14.5	1259.27	1957.26	2344.47	986.318	1572.35	1845.32	1199.63	1200.96	1198	1652.83	2091	1598.1	1756.4	1545.11	1307.84																												146	99.8603	100.558	100.584	101.326	99.2436
147	14.6	1263.51	1942.23	2340.77	986.262	1577.49	1846.09	1196.83	1206.4	1198.22	1657.35	2095.84	1585.37	1751.18	1552.05	1313.69																												147	100.196	99.7857	100.426	101.32	99.568
148	14.7	1255.53	1949.02	2337.19	987.698	1574.73	1849.26	1200.61	1203.1	1196.41	1660.22	2087.45	1594.69	1756.93	1548.31	1313.12																												148	99.5631	100.135	100.272	101.468	99.394
149	14.8	1257.16	1941.43	2340.6	986.982	1567.8	1852.81	1194.6	1204.44	1206.14	1658.3	2095.99	1596.35	1762.04	1544.96	1311.43																												149	99.6929	99.7444	100.419	101.394	98.9565
150	14.9	1258.4	1942.76	2339.98	978.911	1571.37	1839.07	1198.49	1204.97	1196.54	1662.32	2095.33	1594.33	1762.99	1555.4	1306.45																												150	99.791	99.8129	100.392	100.565	99.1815
151	15	1258.59	1941.33	2332.32	982.789	1575.15	1848.01	1205.74	1210.14	1197.77	1660.47	2090.58	1592.52	1754.69	1547.65	1309.47																												151	99.8063	99.7396	100.063	100.963	99.4205
152	15.1	1258.54	1940.51	2331.16	982.447	1571.86	1848.93	1196.35	1202.49	1193.63	1659.43	2086.87	1597.59	1754.04	1557.76	1308.47																												152	99.8023	99.6972	100.013	100.928	99.2123
153	15.2	1261.08	1936.37	2330.55	985.524	1564.44	1839.74	1192.9	1204.06	1196.1	1651.69	2089.85	1591.41	1755.2	1549.04	1307.71																												153	100.003	99.4845	99.9874	101.244	98.7443
154	15.3	1258.48	1937.9	2333	980.555	1555.31	1846.86	1197.32	1201.46	1194.03	1655.13	2095.9	1597.26	1751.65	1553.24	1312.03																												154	99.7976	99.5634	100.092	100.734	98.168
155	15.4	1259.79	1933.5	2333.27	978.69	1553.24	1846.39	1196.85	1201.06	1195.9	1653.61	2095.14	1592.1	1745.24	1546.94	1306.64																												155	99.9012	99.3372	100.104	100.542	98.037
156	15.5	1264.09	1929.13	2325.98	978.484	1564.38	1837.21	1196.33	1186.03	1197.51	1657.7	2081.77	1593.93	1752.08	1537.32	1305.54																												156	100.242	99.1125	99.7912	100.521	98.7406
157	15.6	1256.37	1931.99	2331.52	977.298	1556.71	1831.74	1195.04	1198.03	1201.63	1658.25	2093.14	1595.77	1759.65	1551.16	1311.54																												157	99.6303	99.2597	100.029	100.399	98.2564
158	15.7	1254.19	1923.27	2334.9	976.021	1556.24	1835.81	1191.1	1192.67	1192.98	1658.93	2090.02	1594.28	1756.48	1552.1	1303.83																												158	99.4574	98.8119	100.174	100.268	98.2266
159	15.8	1253.55	1924.08	2325.93	974.299	1556.17	1833.74	1201.3	1195.83	1190.73	1656.47	2083.89	1594.56	1752.65	1549.41	1304.63																												159	99.4065	98.8533	99.7891	100.091	98.2222
160	15.9	1255.49	1924.99	2323.42	971.529	1553.3	1833.51	1188.33	1190.12	1199.15	1652.29	2082.28	1593.34	1753.74	1541.39	1301.21																												160	99.5604	98.9003	99.6812	99.8065	98.0413
161	16	1251.75	1917.72	2311.87	967.696	1547.25	1829.49	1195.62	1188.43	1197	1657.33	2090.64	1581.62	1752.56	1551.7	1296.61																												161	99.2632	98.5263	99.1856	99.4127	97.659
162	16.1	1256.78	1916.53	2321.99	971.204	1555.58	1829.15	1187.92	1199	1190.04	1652.36	2082.87	1587.08	1753.6	1541.81	1291.75																												162	99.6627	98.4653	99.62	99.7731	98.1852
163	16.2	1252.06	1911.06	2318.9	972.36	1547.45	1827.66	1187.25	1199.56	1198.06	1651.92	2085.09	1588.31	1749.97	1539.23	1296.9																												163	99.2879	98.1844	99.4873	99.8918	97.6715
164	16.3	1253.58	1918.88	2319.63	970.407	1547.94	1824.45	1184.35	1189.5	1199.86	1647.46	2075.84	1591.36	1757.4	1541.61	1288.79																												164	99.4084	98.5859	99.5187	99.6912	97.7026
165	16.4	1248.65	1905.67	2311.14	968.793	1544.28	1822.47	1181.75	1185.91	1195.12	1647.55	2084.81	1590.02	1740.04	1540.8	1290.46																												165	99.0176	97.9076	99.1544	99.5255	97.4717
166	16.5	1248.42	1917.36	2318.7	962.065	1540.2	1826.73	1185.48	1186.93	1194.51	1651.03	2085.46	1589.56	1752.64	1548.79	1291.47																												166	98.9997	98.5082	99.4787	98.8342	97.2142
167	16.6	1247.89	1905.9	2311.09	967.498	1540.02	1826.5	1181.93	1186.54	1190.59	1641.7	2082.9	1584.06	1744.03	1550.11	1289.64																												167	98.9578	97.9194	99.1521	99.3924	97.203
168	16.7	1251.69	1895.19	2308.51	958.024	1539.43	1825.61	1186.38	1185.7	1192.9	1638.86	2074.35	1580.77	1744.6	1548.6	1289.87																												168	99.2591	97.3691	99.0416	98.4191	97.1653
169	16.8	1247.52	1900.38	2295.65	962.02	1538.98	1827.31	1180.79	1184.69	1189.61	1645.85	2072.65	1589.21	1746.28	1536.65	1292.24																												169	98.9282	97.6358	98.4898	98.8297	97.1371
170	16.9	1246.51	1899.57	2309.81	966.429	1534.16	1821.17	1184.7	1188.07	1191.68	1644	2071.29	1585	1745.95	1540.56	1278.68																												170	98.8484	97.5938	99.0974	99.2826	96.8327
171	17	1240.48	1892.36	2296.41	957.674	1532.98	1821.68	1172.49	1176.01	1184.81	1643.21	2070.05	1585.39	1744.19	1549.88	1283.94																												171	98.3699	97.2238	98.5223	98.3832	96.7584
172	17.1	1240.48	1894.32	2291.86	959.908	1529.56	1822.73	1178.09	1181.1	1183.75	1634	2068	1587.71	1743.17	1539.57	1290.04																												172	98.3699	97.3241	98.3275	98.6127	96.5429
173	17.2	1234.43	1897.85	2300.97	958.679	1531.9	1825.38	1175.39	1181.25	1189.86	1633.12	2067.88	1583.35	1741.41	1538.42	1281.91																												173	97.8901	97.5058	98.7183	98.4864	96.6907
174	17.3	1239.88	1893.14	2295.3	956.516	1529.2	1814.4	1175.74	1179.33	1188.51	1637.45	2067.72	1584.85	1739.61	1534.23	1285.78																												174	98.3226	97.2636	98.4748	98.2642	96.5201
175	17.4	1239.47	1887.35	2296.61	955.188	1524.67	1815.14	1180.74	1174.7	1191.37	1641.64	2069.47	1588.02	1742.11	1532.28	1279.48																												175	98.2897	96.966	98.531	98.1278	96.2342
176	17.5	1238.95	1883.5	2289.88	954.935	1522.97	1807.23	1173.6	1171.49	1184.15	1632.12	2060.72	1588.27	1739.78	1538.26	1268.99																												176	98.2486	96.7683	98.2425	98.1018	96.1268
177	17.6	1239.47	1880.02	2290.21	950.27	1520.4	1817.04	1168.12	1169.38	1182.54	1633.66	2063.48	1588.07	1739.98	1530.39																													177	98.2899	96.5898	98.2566	97.6225	95.9646
178	17.7	1236.97	1883.56	2281.09	948.503	1511.91	1797.38	1166.26	1171.52	1183.32	1629.17	2064.35	1585.48	1727.25	1537.63	1288.86																												178	98.0914	96.7717	97.8652	97.4411	95.4284
179	17.8	1228.8	1873.53	2279.35	951.909	1515.52	1797.68	1171.48	1171.39	1177.65	1630.92	2059.12	1578.58	1737.79	1525.69	1288.52																												179	97.4433	96.2561	97.7907	97.791	95.6564
180	17.9	1236.31	1880.12	2274.71	950.651	1515.29	1796.27	1167.92	1166	1181.62	1629.66	2053.77	1574.46	1733.74	1525.61	1280.71																												180	98.0396	96.5949	97.5913	97.6617	95.642
181	18	1225.33	1880.28	2275.7	951.298	1512.4	1798.05	1170.42	1167.19	1172.81	1630.95	2055.65	1583.21	1720.18	1525.54	1261.4																												181	97.1683	96.6029	97.6338	97.7282	95.4595
182	18.1	1227.64	1874.03	2272.68	943.52	1508.35	1804.94	1168.15	1166.07	1171.39	1633.91	2055.27	1576.82	1733.04	1536	1261.29																												182	97.3518	96.2816	97.5045	96.9291	95.2036
183	18.2	1227.59	1873.5	2268.75	946.402	1512.15	1795.83	1160.51	1162.23	1172.04	1617.57	2046.9	1579.93	1724.2	1523.15	1264.07																												183	97.3474	96.2545	97.3359	97.2251	95.4436
184	18.3	1234.52	1859.19	2260.36	941.551	1505.32	1793.99	1161.92	1164.18	1178.82	1624.53	2048.1	1575.85	1722.11	1527.4	1271.55																												184	97.8971	95.5194	96.9757	96.7268	95.0125
185	18.4	1229	1869.16	2261.86	942.194	1504.2	1791.72	1160.63	1158.61	1175.16	1620.39	2045.48	1584.3	1726.43	1521.99	1273.27																												185	97.4594	96.0318	97.0401	96.7929	94.9419
186	18.5	1228.81	1861.99	2259.04	934.733	1499.85	1790.81	1153.81	1160.27	1170.92	1620.66	2043.55	1575.39	1727.33	1521.62	1262.87																												186	97.4444	95.6633	96.9191	96.0264	94.6676
187	18.6	1226.7	1861.81	2263.35	942.82	1497.72	1786.55	1157.2	1160.92	1172.4	1616.66	2039.36	1575.25	1716.67	1518.87	1258.48																												187	97.2771	95.6538	97.104	96.8572	94.5331
188	18.7	1221.49	1867.14	2253.83	943.497	1497.03	1780.54	1154.48	1156	1170.62	1621.24	2036.9	1572.68	1716.48	1514.23	1263.8																												188	96.8641	95.928	96.6956	96.9268	94.4892
189	18.8	1220.04	1864.11	2253.15	940.559	1497.45	1780.17	1157.1	1149.27	1168.05	1618.22	2040.34	1568.35	1717.45	1509.25	1270.29																												189	96.7494	95.7721	96.6666	96.6249	94.5159
190	18.9	1220.52	1859.87	2251.98	937.053	1492.6	1775.77	1154.96	1152.28	1167.25	1614.76	2039.2	1571.86	1717.13	1513.93	1261.25																												190	96.787	95.5545	96.6163	96.2647	94.2099
191	19	1212.86	1864.48	2251.04	938.436	1496.17	1776.5	1151.2	1151.17	1166.75	1611.03	2036.97	1572.46	1724.4	1517.77	1262.91																												191	96.1796	95.7912	96.5758	96.4068	94.4349
192	19.1	1212.12	1859.06	2254.04	931.764	1492.11	1780.11	1154.83	1148.88	1162.87	1608.74	2042.16	1567.67	1717.21	1517	1264.49																												192	96.1213	95.5126	96.7047	95.7213	94.1789
193	19.2	1216.76	1854.45	2246.95	930.301	1491.38	1780.61	1155.23	1144.68	1164.13	1608.88	2030.06	1562.22	1712.48	1515.04	1259.73																												193	96.4887	95.2758	96.4006	95.5711	94.1326
194	19.3	1212.27	1850.52	2238.27	932.266	1491.4	1764.01	1147.39	1151.19	1157.03	1605.46	2028.29	1568.69	1723.09	1514.72	1268.33																												194	96.133	95.0741	96.0282	95.773	94.1342
195	19.4	1214.45	1848.24	2239.4	935.371	1484.75	1769.35	1147.37	1147.3	1164.19	1605.67	2026.78	1569.07	1717.05	1502.86	1256.14																												195	96.3059	94.9568	96.0767	96.092	93.7144
196	19.5	1213.19	1845.84	2235.05	937.604	1480.88	1771.07	1149.74	1149.36	1164.15	1606.27	2027.25	1568.95	1713.77	1506.55	1261.1																												196	96.2057	94.8335	95.8901	96.3213	93.4699
197	19.6	1209.59	1849.16	2238.94	931.1	1484.47	1773.06	1142.84	1144.73	1155.88	1607.34	2029.39	1557.99	1711.98	1510.7	1264.26																												197	95.92	95.0039	96.0569	95.6531	93.6969
198	19.7	1204.79	1846.98	2234.69	929.975	1483.94	1764.92	1143.1	1145.64	1150.02	1608.24	2020.75	1555.81	1708.92	1511.49	1260.97																												198	95.5394	94.8921	95.8746	95.5376	93.6633
199	19.8	1209.39	1841.4	2233.85	932.733	1483.63	1762.53	1135.92	1141.4	1147.57	1603.77	2014.07	1557.74	1707.86	1499.11	1256.78																												199	95.9042	94.6055	95.8384	95.821	93.6438
200	19.9	1209.45	1848.13	2235.91	929.221	1483.52	1759.1	1143.5	1142.39	1149.44	1601.85	2013.53	1555.72	1711.91	1506.48	1259.41																												200	95.9093	94.9509	95.927	95.4601	93.6368
201	20	1209.84	1830.87	2231.89	915.827	1469.41	1779.09	1133.33	1134.7	1142.03	1591.77	2008.56	1571.73	1699.59	1486.06	1250.07																												201	95.94	94.0643	95.7545	94.0842	92.7464
202	20.1	1204.38	1824.1	2226.76	916.509	1477.97	1776.69	1144.51	1130.89	1151.51	1593.35	2001.38	1563.28	1703.54	1494.28	1245.63																												202	95.5074	93.7165	95.5344	94.1542	93.2861
203	20.2	1194.75	1827.17	2235.4	905.937	1469.1	1778.08	1131.43	1133.77	1152.17	1592.89	1998.96	1576.21	1697.86	1485.02	1252.47																												203	94.7438	93.8741	95.9051	93.0682	92.7267
204	20.3	1196.9	1832.46	2225.52	910.852	1466.88	1776.71	1132.58	1136.14	1153.28	1585.49	1997.68	1562.6	1706.41	1489.12	1254.14																												204	94.9139	94.1459	95.4811	93.573	92.5866
205	20.4	1202.78	1825.04	2230.85	908.558	1465.41	1769.6	1132.86	1135.79	1146.15	1590.41	1991.74	1572.28	1700.28	1478.19	1249.8																												205	95.3806	93.7651	95.7099	93.3375	92.4938
206	20.5	1198.44	1832.19	2229.01	905.041	1467.55	1767.61	1130.01	1129.92	1152.44	1581.5	1996.15	1567.59	1699.74	1475.98	1260.92																												206	95.0363	94.1324	95.631	92.9761	92.6288
207	20.6	1194.89	1830.21	2221.14	909.792	1464.98	1770.62	1131.18	1130.75	1143.81	1584.69	1997.61	1561.28	1700.42	1475.77	1257.12																												207	94.7546	94.0305	95.2933	93.4641	92.4664
208	20.7	1196.31	1826.45	2225.8	906.9	1466.54	1767.86	1128.34	1130.86	1148.58	1585.08	1995.33	1560.3	1688.14	1484.88	1249.04																												208	94.867	93.8375	95.4933	93.167	92.5653
209	20.8	1198.16	1821.41	2220.06	910.182	1462.08	1763.48	1125.5	1126.99	1150.17	1581.74	1991.14	1563.14	1694.23	1476.53	1250.61																												209	95.0137	93.5786	95.2467	93.5043	92.2835
210	20.9	1202.08	1824.94	2221.84	915.137	1462.77	1766.69	1124.61	1128.14	1136.7	1574.91	1989.94	1563.39	1696.88	1473.66	1247.1																												210	95.3244	93.7598	95.3232	94.0133	92.327
211	21	1201.03	1822.54	2219.3	908.047	1465.77	1765.95	1121.3	1132.65	1146.41	1576.64	1986.04	1562.45	1689.1	1471.79	1242.4																												211	95.2417	93.6363	95.2144	93.2849	92.5163
212	21.1	1192.18	1818.53	2211.99	906.626	1457.38	1767.01	1122.16	1126.68	1140.07	1576.47	1989.62	1563.35	1683.32	1469.08	1251.4																												212	94.54	93.4304	94.9007	93.1389	91.9867
213	21.2	1191.91	1825.72	2212.77	906.457	1458.87	1763.74	1131.38	1128.3	1137.48	1574.44	1979.94	1557.94	1686.68	1475.16	1246.7																												213	94.5185	93.7996	94.934	93.1215	92.0807
214	21.3	1190.58	1821.04	2215.72	908.564	1460.57	1764.53	1113.48	1120.82	1139.18	1572.31	1976.38	1557.07	1679.32	1470.3	1250.25																												214	94.4126	93.5596	95.0605	93.338	92.1884
215	21.4	1189.16	1822.16	2212.09	908.645	1463.14	1759.19	1125.76	1122.46	1142.67	1572.2	1984.16	1555.26	1690.07	1471.28	1248.45																												215	94.3003	93.6169	94.905	93.3463	92.3503
216	21.5	1186.15	1815.98	2209.83	904.534	1456.94	1758.38	1117.69	1123.9	1134.58	1567.11	1976.35	1556.74	1683.27	1474.04	1244.52																												216	94.0612	93.2995	94.8081	92.924	91.9589
217	21.6	1186.15	1817.53	2204.46	906.47	1455.81	1751.1	1116.94	1116.54	1139.35	1572.06	1975.91	1554.96	1683.84	1465.41	1242.7																												217	94.0615	93.3789	94.5774	93.1229	91.8877
218	21.7	1188.58	1814.24	2209.97	912.811	1453.15	1753.25	1119.79	1117.83	1135.61	1563.01	1977.56	1548.91	1684.67	1465.56	1251.34																												218	94.2542	93.21	94.8138	93.7743	91.7201
219	21.8	1189.35	1811.83	2208.21	904.334	1449.52	1749.6	1125.41	1115.06	1135.9	1569.53	1969.8	1550.74	1679.38	1463.25	1240.73																												219	94.3155	93.0864	94.7384	92.9034	91.4909
220	21.9	1185.73	1816.04	2197.19	899.293	1451.29	1753.27	1117.59	1112.8	1133.98	1565.69	1970.97	1552.02	1675.58	1463.84	1248.79																												220	94.028	93.3024	94.2656	92.3856	91.6023
221	22	1190.78	1812.93	2205.07	898.472	1454.47	1746.3	1109.45	1116.96	1132.58	1559.55	1969.69	1542.09	1683.67	1464.49	1248.69																												221	94.4284	93.1427	94.6036	92.3013	91.8034
222	22.1	1183.99	1810.15	2210.26	908.532	1449.99	1754.91	1119.45	1111.23	1126.92	1567.98	1967.98	1542.6	1675.04	1458.96	1248.68																												222	93.89	93.0001	94.8265	93.3347	91.5203
223	22.2	1184.45	1813.38	2209.4	898.227	1449.28	1754.62	1119.79	1106.95	1125.79	1558.72	1962.94	1543.06	1670.27	1455.51	1245.71																												223	93.9269	93.1656	94.7894	92.2761	91.4753
224	22.3	1190.72	1812.29	2208.81	898.494	1445.62	1751.79	1116.24	1115.25	1121.62	1557.91	1969.09	1547.68	1673.35	1454.76	1234.98																												224	94.4238	93.1097	94.7644	92.3035	91.2447
225	22.4	1183.65	1814.99	2202.96	899.801	1441.97	1749.54	1115.81	1115.51	1136.17	1554.41	1958.67	1544.24	1674.71	1454.6	1238.77																												225	93.8631	93.2483	94.5133	92.4377	91.0142
226	22.5	1189.48	1812.96	2198.34	900.506	1449.25	1742.96	1116.62	1108.85	1122.68	1560.63	1970.69	1541.23	1672.25	1451.29	1243.25																												226	94.3259	93.1444	94.3152	92.5102	91.4734
227	22.6	1186.45	1809.05	2200	900.748	1442.27	1743.76	1119.38	1111.98	1125.91	1555.98	1961.96	1548.22	1675.12	1453.33	1240.79																												227	94.0854	92.9435	94.3862	92.5351	91.0332
228	22.7	1187.79	1812.68	2203.45	903.83	1447.04	1740.48	1118.19	1115.29	1127.74	1553.31	1959.35	1540.14	1664.84	1456.08	1244.49																												228	94.1919	93.13	94.5341	92.8516	91.3341
229	22.8	1187.74	1810.07	2196.7	901.516	1447.01	1742.45	1109.93	1110.33	1127.62	1555.52	1954.33	1534.81	1665.67	1461.08	1241.1																												229	94.1875	92.9959	94.2448	92.6139	91.3321
230	22.9	1185.55	1809.84	2198.51	906.363	1444.98	1742.71	1109.22	1108.02	1122.57	1548.96	1959.05	1540.89	1666.75	1455.57	1243.71																												230	94.0138	92.9837	94.3223	93.1119	91.2043
231	23	1183.32	1808.93	2195.76	899.489	1441.43	1740.31	1109.04	1111.14	1121.5	1550.26	1959.04	1532.22	1672.88	1447.66	1244.82																												231	93.8373	92.9371	94.2041	92.4057	90.9802
232	23.1	1184.5	1812.79	2196.14	898.19	1444.04	1741.85	1111.38	1111.77	1126.4	1550.35	1954.79	1533.49	1661.22	1451.33	1238.67																												232	93.9308	93.1354	94.2206	92.2722	91.1451
233	23.2	1183.32	1813.49	2196.07	894.962	1446.27	1740.28	1107.09	1103.86	1126.26	1554.28	1953.45	1536.19	1663.29	1448.73	1239.11																												233	93.837	93.1712	94.2176	91.9407	91.2856
234	23.3	1180.71	1811.02	2194.56	902.24	1442.92	1741.09	1107.65	1101.14	1118.17	1551.67	1953.46	1540.11	1664.07	1445.64	1240.64																												234	93.63	93.0445	94.1527	92.6883	91.0739
235	23.4	1185.86	1800.89	2184.44	900.841	1436.95	1731.3	1104.05	1108.51	1120.46	1550.25	1946.78	1533.95	1665.95	1444.15	1230.13																												235	94.0382	92.5239	93.7189	92.5446	90.6971
236	23.5	1182.89	1812.05	2192.65	903.477	1440.74	1737.76	1106.95	1103.36	1117.64	1549.05	1951.94	1536.48	1657.22	1443.04	1240.84																												236	93.8033	93.0976	94.0708	92.8155	90.9363
237	23.6	1185.52	1819.13	2185.67	910.74	1434.15	1709.69	1110.56	1112.91	1122.48	1544.75	1959.91	1517.25	1665.19	1457.71	1223.74																												237	94.0113	93.4612	93.7715	93.5615	90.5204
238	23.7	1183.85	1823.18	2191.96	907.298	1448.54	1721.03	1112.92	1108.85	1116.74	1552.87	1963.62	1514.35	1656.44	1456.65	1245.57																												238	93.8794	93.6692	94.0414	93.208	91.4286
239	23.8	1182.29	1817.51	2189.03	909.939	1440.22	1720.38	1112.32	1108.62	1114.04	1546.05	1957.07	1524.37	1653.26	1451.57	1244.34																												239	93.7554	93.3782	93.9157	93.4793	90.9038
240	23.9	1183.72	1818.41	2190.95	913.047	1440.16	1718.76	1112.28	1102.99	1118.46	1542.42	1953.44	1518.1	1653.66	1448.49	1230.03																												240	93.8686	93.4241	93.998	93.7986	90.8997
241	24	1181.39	1821.15	2188.47	910.083	1447.4	1715.33	1113.71	1102.95	1115.78	1543.9	1955.88	1517.18	1655.66	1453.62	1241.5																												241	93.6841	93.565	93.8914	93.4941	91.3566
242	24.1	1182.18	1808.37	2183.78	909.191	1434.78	1713.96	1111.09	1103.55	1117.26	1543.59	1953.36	1505.99	1654.75	1452.67	1231.97																												242	93.7464	92.9086	93.6904	93.4025	90.5605
243	24.2	1184.53	1814.1	2187.19	912.226	1445.79	1713.47	1112.55	1106.96	1110.65	1542.74	1954.63	1512.9	1654.43	1457.11	1229.74																												243	93.933	93.2028	93.8367	93.7142	91.2553
244	24.3	1181.68	1821.5	2188.8	909.803	1434.2	1711.27	1108.72	1101.74	1109.12	1543.84	1951.05	1508.04	1645.65	1448.17	1239.62																												244	93.7074	93.583	93.9058	93.4653	90.524
245	24.4	1182.31	1818.24	2190.52	911.657	1436.05	1724.55	1113.48	1103.28	1110.45	1542.61	1947.58	1504.43	1648.88	1453.37	1233.47																												245	93.7569	93.4155	93.9796	93.6558	90.6405
246	24.5	1178.3	1816.11	2187.03	915.799	1441.62	1714.05	1106.97	1102.32	1107.1	1534.75	1942.68	1508.42	1648.28	1443.51	1236.63																												246	93.4388	93.306	93.8299	94.0813	90.9922
247	24.6	1190	1814.51	2184.67	911.021	1439.05	1709.08	1101.29	1104.02	1112.16	1544.36	1950.05	1506.54	1654.44	1456.45	1236.76																												247	94.3667	93.2239	93.7288	93.5904	90.8301
248	24.7	1191.54	1816.88	2184.55	909.71	1439.35	1715.53	1104.87	1100.45	1113.55	1537.81	1946.62	1505.36	1643.15	1453.12	1231.78																												248	94.4889	93.3457	93.7233	93.4558	90.8485
249	24.8	1187.65	1812.09	2183.19	913.549	1440.84	1716.24	1104.06	1105.92	1109.53	1545.72	1944.23	1518.1	1646.53	1453.73	1235.47																												249	94.1808	93.0998	93.6652	93.8501	90.9427
250	24.9	1179.73	1814.39	2182.81	911.678	1432.01	1713.25	1102.55	1101.18	1106.71	1540.98	1945.33	1511.4	1642.74	1445.59	1234.3																												250	93.5521	93.2178	93.6486	93.6579	90.3856
251	25	1179.5	1816.71	2184.89	910.272	1437.78	1709.02	1109.99	1106.42	1107.25	1544.28	1946.02	1508.37	1643.36	1440.76	1236.79																												251	93.5342	93.3371	93.7378	93.5135	90.7497
252	25.1	1186.47	1816.08	2186.64	904.057	1436.07	1710.93	1107.19	1106.19	1110.48	1534.15	1951.15	1504.02	1639.35	1442.36	1229.91																												252	94.0867	93.3046	93.8131	92.875	90.6415
253	25.2	1187.22	1812.22	2178.32	906.444	1435.28	1710.81	1105.05	1094.14	1105.11	1535.53	1941.9	1498.63	1641.66	1439.41	1235.55																												253	94.1461	93.1062	93.456	93.1202	90.5921
254	25.3	1173.02	1815.65	2184.9	901.348	1436.85	1713.17	1105.75	1097.76	1111.61	1535.45	1944.4	1503.71	1637.73	1448.55	1237.66																												254	93.0203	93.2822	93.7385	92.5968	90.6913
255	25.4	1189.21	1814.51	2184.08	907.616	1432.48	1705.7	1096.6	1095.25	1106.52	1535.39	1942.08	1506.48	1637.1	1437.92	1235.76																												255	94.3039	93.2237	93.703	93.2407	90.4153
256	25.5	1178.47	1819.6	2183.86	903.754	1432.92	1717.64	1102.13	1097.36	1101.92	1537.08	1941.19	1500.84	1639.48	1445.3	1232.77																												256	93.4524	93.4855	93.6937	92.8438	90.4429
257	25.6	1177.65	1814.57	2180.88	911.258	1430.56	1707.09	1100.31	1101.9	1107.76	1538.42	1941.92	1503.79	1640.61	1444.62	1232.37																												257	93.3877	93.2271	93.5657	93.6147	90.2939
258	25.7	1184.68	1815.61	2180.46	908.121	1435.89	1708.77	1097.16	1098.24	1104.86	1541.27	1938.79	1501.34	1633.24	1433.81	1232.77																												258	93.9446	93.2805	93.5478	93.2925	90.6302
259	25.8	1180.87	1819.26	2189.56	906.714	1438.52	1709.59	1104	1096.2	1097.56	1531.34	1932.48	1494.96	1637.21	1438.09	1224.14					Vf	1173.48	1800.95	2162.66	898.674	1415.69	1700	1081.13	1073.85	1070.01	1495.3	1899.66	1465.34	1550	1418.13	1220.06								259	93.6427	93.4678	93.9383	93.148	90.7965
260	25.9	1181.75	1810.3	2178.55	902.804	1433.43	1707.19	1098.41	1096.49	1099.19	1532.44	1935.47	1492.66	1637.56	1443.36	1240.59					time	3.98401	4.00876	4.72021	4.08452	5.01484	5.91637	5.78093	6.26731	6.85634	6.70753	5.53625	4.36428	10.4343	4.39589	5.75411								260	93.713	93.0073	93.4659	92.7463	90.4753
261	26	1180.34	1813.57	2180.67	906.485	1431.23	1709.32	1103.97	1101.54	1112.55	1528.77	1935.64	1493.55	1628.18	1432.49	1232.56					Vi	1267.32	1975.35	2352.54	994.067	1598.44	1867.87	1209.24	1219.56	1208.77	1663.78	2103.53	1598.16	1765.46	1557.49	1325.52								261	93.6005	93.1754	93.557	93.1244	90.3363
262	26.1	1179.87	1816.14	2177.1	909.153	1432.72	1702.82	1100.85	1097.47	1106.01	1530.75	1932.32	1499.46	1632.29	1436.11	1232.88																												262	93.5632	93.3076	93.4039	93.3985	90.4306
263	26.2	1180.28	1811.26	2183.15	905.707	1437.63	1700.65	1105.97	1096.1	1110.89	1534.42	1936.07	1492.29	1634.19	1446.66	1227.92																												263	93.5963	93.0571	93.6634	93.0445	90.7404
264	26.3	1183.12	1814.07	2177.04	908.951	1435.87	1705.07	1095.85	1098.75	1105.34	1526.19	1936.97	1499.24	1624.44	1435.57	1230.43																												264	93.8215	93.2012	93.4013	93.3778	90.6293
265	26.4	1179.81	1805.7	2179.27	906.077	1433.82	1701.97	1105.88	1094.75	1100.18	1528.01	1935.55	1496.05	1630.65	1437.3	1226.65					Vf	time	Vi																					265	93.5589	92.7713	93.4967	93.0825	90.4998
266	26.5	1180.7	1809.66	2186.42	909.864	1433.16	1702.49	1104.71	1095.35	1097.23	1522.9	1936.92	1491.39	1629.37	1438.88	1231.8				1	1173.48	3.98401	1267.32																					266	93.6293	92.9748	93.8037	93.4715	90.4583
267	26.6	1176.96	1812.61	2175.3	906.466	1431.13	1699.47	1101.71	1094.26	1098.93	1534.15	1935.45	1490.55	1626.41	1434.66	1223.65				2	1800.95	4.00876	1975.35																					267	93.3324	93.1263	93.3266	93.1225	90.3297
268	26.7	1175.94	1818.45	2175.36	904.307	1429.66	1707.23	1096.55	1098.6	1094.75	1527.39	1931.4	1499.8	1632.03	1434.41	1229.15				3	2162.66	4.72021	2352.54																					268	93.2516	93.4263	93.3293	92.9007	90.2374
269	26.8	1178	1811.66	2178.59	905.217	1433.53	1704.82	1101.5	1090.8	1089.08	1524.57	1937.3	1492.57	1624.23	1432.09	1234.05				5	898.674	4.08452	994.067																					269	93.4154	93.0773	93.4676	92.9942	90.4815
270	26.9	1180.33	1807.52	2181.11	902.981	1431.1	1706.2	1099.72	1091.69	1094.62	1524.18	1932.27	1485.59	1623.04	1435.99	1224.95				6	1415.69	5.01484	1598.44																					270	93.5998	92.8649	93.5759	92.7645	90.3278
271	27	1178.65	1817.05	2184.06	899.663	1435.88	1703.18	1099.93	1096.53	1094.83	1524.98	1924.96	1491.93	1625.48	1433.35	1226.62				8	1700	5.91637	1867.87																					271	93.4669	93.3544	93.7022	92.4236	90.6297
272	27.1	1178.76	1809.17	2173.37	904.538	1430.64	1705.23	1100.38	1096.17	1097.55	1527.3	1929.18	1494.35	1623.71	1429.92	1228.96				9	1081.13	5.78093	1209.24																					272	93.4757	92.9495	93.2439	92.9244	90.299
273	27.2	1174.88	1809.4	2177.16	902.833	1430.56	1702.13	1100.76	1097.16	1097.31	1533.23	1930.37	1492.05	1627.91	1431.95	1226.9				10	1073.85	6.26731	1219.56																					273	93.1677	92.9612	93.4064	92.7493	90.2939
274	27.3	1183.79	1813.92	2183.38	908.746	1430.13	1706.26	1094	1093.48	1093.25	1524.53	1927.61	1497.93	1620.51	1427.98	1229.61				11	1070.01	6.85634	1208.77																					274	93.8741	93.1935	93.6732	93.3567	90.2669
275	27.4	1179.27	1810.89	2174.31	900.167	1436.16	1711.01	1095.91	1095.38	1096.49	1523.16	1931.93	1490.26	1625.48	1430.88	1234.4				12	1495.3	6.70753	1663.78																					275	93.5157	93.0379	93.2839	92.4754	90.6476
276	27.5	1178.24	1817.2	2178.56	905.337	1434.95	1703.77	1093.41	1093.94	1090.02	1521.57	1925.93	1488.68	1621.91	1440.13	1224.74				15	1899.66	5.53625	2103.53																					276	93.4347	93.3619	93.4664	93.0065	90.5709
277	27.6	1178.95	1808.43	2180.62	906.109	1426.81	1705.41	1093.92	1091.34	1092.62	1517.72	1926.39	1490.17	1618.44	1436.13	1229.29				17	1465.34	4.36428	1598.16																					277	93.4904	92.9115	93.5546	93.0858	90.0574
278	27.7	1178.17	1807.31	2178.01	912.07	1432.27	1694.43	1099.45	1095.67	1096.18	1521.16	1929.97	1483.23	1615.7	1426.03	1231.02				18	1550	10.4343	1765.46																					278	93.4286	92.8541	93.4428	93.6981	90.4021
279	27.8	1176.38	1807.92	2176.86	904.602	1430.25	1698.19	1095.48	1088.97	1093.81	1527.29	1934.13	1489.97	1625.55	1432.4	1227.86				19	1418.13	4.39589	1557.49																					279	93.2869	92.8853	93.3935	92.931	90.2746
280	27.9	1174.59	1808.95	2175.08	898.723	1433.61	1703.03	1093.61	1090.3	1089.92	1521.12	1924.59	1489.21	1627.69	1429.37	1224.08				22	1220.06	5.75411	1325.52																					280	93.145	92.938	93.3173	92.3271	90.4865
281	28	1180.57	1806.23	2179.29	902.096	1428.72	1703.88	1100.56	1091.81	1092.66	1521.64	1925.19	1485.43	1618.41	1431.65	1234.43																												281	93.6193	92.7983	93.4976	92.6736	90.1776
282	28.1	1178.23	1808.15	2175.61	900.046	1430.64	1697.96	1090.28	1092.67	1096.61	1523.15	1930.11	1492.55	1620.07	1422.87	1229.7																												282	93.4337	92.8972	93.3399	92.4629	90.2988
283	28.2	1179.22	1806.67	2178.03	903.375	1424.85	1699.36	1095.32	1094.24	1090.16	1517.5	1921.37	1480.67	1619.88	1428.7	1225.93																												283	93.512	92.821	93.4438	92.805	89.9336
284	28.3	1178.99	1810.01	2176.01	902.005	1431.39	1705.76	1089.76	1086.63	1091.98	1519.18	1924.14	1486.61	1619.96	1432.22	1235.34																												284	93.494	92.9929	93.3571	92.6642	90.3461
285	28.4	1184.9	1807.26	2178.92	901.078	1428.15	1701.7	1103.89	1093.66	1084.76	1516.02	1926.78	1483.4	1619.49	1427.11	1229.48																												285	93.9625	92.8514	93.482	92.569	90.1419
286	28.5	1186.55	1806.26	2178.81	903.327	1431.95	1694.93	1097.05	1096.48	1092.11	1524.2	1922.6	1484.69	1618.25	1428	1231.4																												286	94.093	92.8002	93.4773	92.8	90.3817
287	28.6	1180.08	1806.28	2184	903.119	1427.23	1697.76	1092.91	1092.19	1094.16	1520.57	1925.14	1484.97	1616.82	1435.68	1239.38																												287	93.5806	92.8013	93.6999	92.7787	90.0839
288	28.7	1174.97	1809.16	2174.72	905.295	1424.35	1696.89	1091.64	1089.75	1091.01	1524.22	1921.85	1483.26	1619.92	1419.76	1228.54																												288	93.175	92.949	93.3018	93.0022	89.9018
289	28.8	1175.11	1809.49	2181.99	907.855	1428.46	1697.84	1092.66	1092.66	1090.77	1511.56	1916.87	1484.17	1613.4	1431.26	1227.14																												289	93.1857	92.9658	93.6134	93.2652	90.1613
290	28.9	1179.76	1810.76	2173.94	904.201	1429.25	1695.53	1090.17	1088.06	1090.11	1517.59	1916.37	1481.27	1616.19	1421.99	1230.07																												290	93.5549	93.0313	93.2681	92.8898	90.2116
291	29	1172.25	1799.26	2177.32	908.392	1427.75	1704.66	1091.65	1090.7	1084.24	1519.01	1920.48	1475.73	1615.54	1428.98	1235.72																												291	92.9592	92.4402	93.4133	93.3204	90.1167
292	29.1	1174.48	1806.15	2174.39	910.456	1427.44	1697.05	1097.19	1085.95	1088.22	1521.11	1920.11	1480.96	1609.21	1428.87	1233.52																												292	93.1358	92.7944	93.2876	93.5324	90.0971
293	29.2	1177.58	1808.69	2176.6	902.273	1424.8	1700.16	1093.11	1090.44	1090.13	1514.86	1915	1479.23	1614.34	1426.39	1229.36																												293	93.3816	92.925	93.3823	92.6918	89.9306
294	29.3	1181.48	1809.59	2170.15	907.141	1424.94	1705.13	1088.31	1089.33	1083.02	1521.51	1915.55	1484.75	1618.94	1421.73	1237.75																												294	93.6912	92.9712	93.1058	93.1918	89.9391
295	29.4	1172.48	1811.89	2176.67	906.675	1430.09	1702.52	1092.99	1090.96	1087.15	1520.39	1913.49	1481.23	1615.54	1427.14	1229.42																												295	92.9775	93.0894	93.3855	93.1439	90.2644
296	29.5	1177.6	1809.54	2174.75	909.736	1429.72	1698.75	1096.06	1086.49	1092.8	1520.76	1926.8	1475.7	1616.11	1427.12	1229.87																												296	93.3839	92.9685	93.3029	93.4584	90.2407
297	29.6	1173.91	1800.72	2171.77	908.082	1430.74	1698.52	1094.82	1093.17	1086.94	1513.65	1919.95	1489.48	1616.29	1425.04	1222.92																												297	93.091	92.5156	93.1751	93.2885	90.3052
298	29.7	1178.22	1809.91	2166.97	901.075	1424.13	1701.23	1091.76	1089.17	1097.43	1519.99	1918.69	1488.28	1617.27	1429.71	1230.38																												298	93.4324	92.9877	92.9693	92.5687	89.8878
299	29.8	1177.31	1807.79	2177.21	904.364	1425.76	1696.2	1091.42	1087.8	1085.26	1515.61	1915.9	1480.73	1616.12	1427.37	1225.18																												299	93.3609	92.8786	93.4083	92.9066	89.9908
300	29.9	1180.92	1804.27	2174.89	900.974	1429.12	1696.17	1096.52	1092.16	1086.04	1516.53	1917.49	1475.23	1607.11	1422.7	1227.46																												300	93.6467	92.698	93.309	92.5583	90.2034
301	30	1176.78	1807.74	2167.19	903.725	1428.4	1698.94	1095.74	1094.99	1089.89	1513.72	1921.52	1477.4	1601.32	1419.04	1231.18																												301	93.3185	92.8759	92.9787	92.8409	90.1577
302	30.1	1181.63	1809.27	2172.2	906.482	1426.1	1702.46	1091.89	1088.2	1084.35	1515.27	1915.29	1474.54	1608.44	1425.49	1228.93																												302	93.7034	92.9545	93.1934	93.1241	90.0122
303	30.2	1180.29	1808.79	2173.74	910.69	1426.78	1700.66	1088.45	1092.36	1083.72	1519.46	1920.97	1473.91	1609.29	1422.02	1233.27																												303	93.597	92.9302	93.2596	93.5565	90.0552
304	30.3	1186.99	1811.08	2175.59	903.761	1422.46	1697.34	1097.22	1085.33	1085.16	1510.6	1913.04	1482.2	1600.31	1419.17	1229.98																												304	94.1282	93.0479	93.3389	92.8447	89.7824
305	30.4	1182.49	1809.93	2176.61	907.179	1435.72	1699.29	1092.32	1093.02	1086.43	1518.09	1916.28	1478.02	1601.69	1423.61	1235.54																												305	93.7712	92.9884	93.3829	93.1958	90.6199
306	30.5	1176.7	1810.66	2177.92	904.174	1423.57	1696.41	1091.04	1093.37	1085.93	1511.32	1911.49	1477.54	1610.67	1425.09	1227.97																												306	93.3122	93.0263	93.4388	92.887	89.8526
	Vf	1173.48	1800.95	2162.66	898.674	1415.69	1700	1081.13	1073.85	1070.01	1495.3	1899.66	1465.34	1550	1418.13	1220.06
	time	3.98401	4.00876	4.72021	4.08452	5.01484	5.91637	5.78093	6.26731	6.85634	6.70753	5.53625	4.36428	10.4343	4.39589	5.75411
	Vi	1267.32	1975.35	2352.54	994.067	1598.44	1867.87	1209.24	1219.56	1208.77	1663.78	2103.53	1598.16	1765.46	1557.49	1325.52
[truncated: 12 more columns]
