# Supplementary material for: A mechano-osmotic feedback couples cell volume to the rate of cell deformation
Source: eLife journal article supplement (doi:10.7554/elife.72381), 2022-04-13
Supplement: supp [file 1.25.xlsx]

## Sheet: Sheet1
ID	lineage	Frame	Cell_Intensisty
Stack1-100.tif	1	1	2065.61
Stack1-100.tif	1	2	2058.97
Stack1-100.tif	1	3	2065.73
Stack1-100.tif	1	4	2064.94
Stack1-100.tif	1	5	2061.76
Stack1-100.tif	1	6	2069.88
Stack1-100.tif	1	7	2061.73
Stack1-100.tif	1	8	2075.84
Stack1-100.tif	1	9	2059.38
Stack1-100.tif	1	10	2069.05
Stack1-100.tif	1	11	2064.42
Stack1-100.tif	1	12	2070.56
Stack1-100.tif	1	13	2071.67
Stack1-100.tif	1	14	2069.8
Stack1-100.tif	1	15	2075.62
Stack1-100.tif	1	16	1670.18
Stack1-100.tif	1	17	177.073
Stack1-100.tif	1	18	887.374
Stack1-100.tif	1	19	2464.95
Stack1-100.tif	1	20	2119.87
Stack1-100.tif	1	21	2109.18
Stack1-100.tif	1	22	2116.61
Stack1-100.tif	1	23	2111.78
Stack1-100.tif	1	24	2810.77
Stack1-100.tif	1	25	2106.18
Stack1-100.tif	1	26	1983.53
Stack1-100.tif	1	27	2142.83
Stack1-100.tif	1	28	311.188
Stack1-100.tif	1	29	1916.15
Stack1-100.tif	1	30	2144.72
Stack1-100.tif	1	31	2133.62
Stack1-100.tif	1	32	3154.21
Stack1-100.tif	1	33	2044.4
Stack1-100.tif	1	34	2123.69
Stack1-100.tif	1	35	2129.56
Stack1-100.tif	1	36	2148.62
Stack1-100.tif	1	37	2168.69
Stack1-100.tif	1	38	2130.73
Stack1-100.tif	1	39	-156.989
Stack1-100.tif	1	40	2146
Stack1-100.tif	1	41	2118.71
Stack1-100.tif	1	42	2114.36
Stack1-100.tif	1	43	2116.94
Stack1-100.tif	1	44	1913
Stack1-100.tif	1	45	2113.93
Stack1-100.tif	1	46	210.696
Stack1-100.tif	1	47	2128.32
Stack1-100.tif	1	48	2114.78
Stack1-100.tif	1	49	2120.53
Stack1-100.tif	1	50	2136.21
Stack1-100.tif	1	51	2122.32
Stack1-100.tif	1	52	2113.94
Stack1-100.tif	1	53	2116.45
Stack1-100.tif	1	54	2126.5
Stack1-100.tif	1	55	2116.46
Stack1-100.tif	1	56	2113.03
Stack1-100.tif	1	57	2111.5
Stack1-100.tif	1	58	2116.22
Stack1-100.tif	1	59	2127.62
Stack1-100.tif	1	60	2121.79
Stack1-100.tif	1	61	1961.49
Stack1-100.tif	1	62	2105.44
Stack1-100.tif	1	63	2154.7
Stack1-100.tif	1	64	4685.59
Stack1-100.tif	1	65	501.953
Stack1-100.tif	1	66	1666.86
Stack1-100.tif	1	67	2078.44
Stack1-100.tif	1	68	2069.28
Stack1-100.tif	1	69	2128.92
Stack1-100.tif	1	70	2115.3
Stack1-100.tif	1	71	3118.98
Stack1-100.tif	1	72	2100.16
Stack1-100.tif	1	73	2102.6
Stack1-100.tif	1	74	1871.35
Stack1-100.tif	1	75	2537.89
Stack1-100.tif	1	76	2114.14
Stack1-100.tif	1	77	2089.61
Stack1-100.tif	1	78	3041.01
Stack1-100.tif	1	79	2159.26
Stack1-100.tif	1	80	2068.67
Stack1-100.tif	1	81	2357.77
Stack1-100.tif	1	82	2399.25
Stack1-100.tif	1	83	2085.52
Stack1-100.tif	1	84	2077.44
Stack1-100.tif	1	85	2058.21
Stack1-100.tif	1	86	2093.96
Stack1-100.tif	1	87	2210.72
Stack1-100.tif	1	88	2003.2
Stack1-100.tif	1	89	1999.8
Stack1-100.tif	1	90	2151.23
Stack1-100.tif	1	91	2200.94
Stack1-100.tif	1	92	2182.86
Stack1-100.tif	1	93	2209.64
Stack1-100.tif	1	94	2219.75
Stack1-100.tif	1	95	3670.09
Stack1-100.tif	1	96	2247.7
Stack1-100.tif	1	97	2245.18
Stack1-100.tif	1	98	2247.18
Stack1-100.tif	1	99	2276.34
Stack1-100.tif	1	100	2261.21
Stack101-200.tif	1	101	2294.7
Stack101-200.tif	1	102	2289.29
Stack101-200.tif	1	103	2317.93
Stack101-200.tif	1	104	2342.3
Stack101-200.tif	1	105	2273.6
Stack101-200.tif	1	106	2332.76
Stack101-200.tif	1	107	2330.92
Stack101-200.tif	1	108	2356.38
Stack101-200.tif	1	109	2356.59
Stack101-200.tif	1	110	2334.96
Stack101-200.tif	1	111	2360.55
Stack101-200.tif	1	112	2353.68
Stack101-200.tif	1	113	2363.5
Stack101-200.tif	1	114	2368.57
Stack101-200.tif	1	115	2382.87
Stack101-200.tif	1	116	2374.4
Stack101-200.tif	1	117	2391.94
Stack101-200.tif	1	118	2395.29
Stack101-200.tif	1	119	2428.28
Stack101-200.tif	1	120	2399.41
Stack101-200.tif	1	121	2414.01
Stack101-200.tif	1	122	2413.47
Stack101-200.tif	1	123	2394.43
Stack101-200.tif	1	124	2450
Stack101-200.tif	1	125	2425.24
Stack101-200.tif	1	126	2425.54
Stack101-200.tif	1	127	2866.24
Stack101-200.tif	1	128	2388.47
Stack101-200.tif	1	129	2432.23
Stack101-200.tif	1	130	2420.15
Stack101-200.tif	1	131	2420.66
Stack101-200.tif	1	132	2431.31
Stack101-200.tif	1	133	2433.79
Stack101-200.tif	1	134	2439.32
Stack101-200.tif	1	135	2434.55
Stack101-200.tif	1	136	2431.28
Stack101-200.tif	1	137	2424.45
Stack101-200.tif	1	138	2431.89
Stack101-200.tif	1	139	2437.97
Stack101-200.tif	1	140	2433
Stack101-200.tif	1	141	2437.17
Stack101-200.tif	1	142	2444.13
Stack101-200.tif	1	143	2427.02
Stack101-200.tif	1	144	2427.52
Stack101-200.tif	1	145	2435.47
Stack101-200.tif	1	146	2446.5
Stack101-200.tif	1	147	2446.33
Stack101-200.tif	1	148	2447.79
Stack101-200.tif	1	149	2429.63
Stack101-200.tif	1	150	2435.73
Stack101-200.tif	1	151	2438.31
Stack101-200.tif	1	152	2435.82
Stack101-200.tif	1	153	2440.3
Stack101-200.tif	1	154	2439.47
Stack101-200.tif	1	155	2447.85
Stack101-200.tif	1	156	2440.16
Stack101-200.tif	1	157	2458.7
Stack101-200.tif	1	158	2449.99
Stack101-200.tif	1	159	2434.78
Stack101-200.tif	1	160	2441.38
Stack101-200.tif	1	161	2431.5
Stack101-200.tif	1	162	2439.82
Stack101-200.tif	1	163	2437.54
Stack101-200.tif	1	164	2455.22
Stack101-200.tif	1	165	2446.31
Stack101-200.tif	1	166	2439.48
Stack101-200.tif	1	167	2467.74
Stack101-200.tif	1	168	2452.33
Stack101-200.tif	1	169	2443.2
Stack101-200.tif	1	170	2439.81
Stack101-200.tif	1	171	2442.57
Stack101-200.tif	1	172	2456.12
Stack101-200.tif	1	173	2441.25
Stack101-200.tif	1	174	2452.93
Stack101-200.tif	1	175	2442.07
Stack101-200.tif	1	176	2453.31
Stack101-200.tif	1	177	2448.05
Stack101-200.tif	1	178	2445.2
Stack101-200.tif	1	179	2460.7
Stack101-200.tif	1	180	2443.89
Stack101-200.tif	1	181	2443.63
Stack101-200.tif	1	182	2439.28
Stack101-200.tif	1	183	2458.32
Stack101-200.tif	1	184	2438.97
Stack101-200.tif	1	185	2453.65
Stack101-200.tif	1	186	2437.33
Stack101-200.tif	1	187	2437.53
Stack101-200.tif	1	188	2434.82
Stack101-200.tif	1	189	2452.32
Stack101-200.tif	1	190	2454.2
Stack101-200.tif	1	191	2452.98
Stack101-200.tif	1	192	2443.58
Stack101-200.tif	1	193	2449.22
Stack101-200.tif	1	194	2453.71
Stack101-200.tif	1	195	2441.4
Stack101-200.tif	1	196	2441.23
Stack101-200.tif	1	197	2440.19
Stack101-200.tif	1	198	2445.02
Stack101-200.tif	1	199	2452.73
Stack101-200.tif	1	200	2444.54
Stack201-300.tif	1	201	2449.02
Stack201-300.tif	1	202	2450.86
Stack201-300.tif	1	203	2434.51
Stack201-300.tif	1	204	2451.84
Stack201-300.tif	1	205	2443.41
Stack201-300.tif	1	206	2458.31
Stack201-300.tif	1	207	2432.81
Stack201-300.tif	1	208	2447.55
Stack201-300.tif	1	209	2453.45
Stack201-300.tif	1	210	2443.67
Stack201-300.tif	1	211	2436.29
Stack201-300.tif	1	212	2442.32
Stack201-300.tif	1	213	2433.64
Stack201-300.tif	1	214	2427.44
Stack201-300.tif	1	215	2443.12
Stack201-300.tif	1	216	2444.43
Stack201-300.tif	1	217	2444.09
Stack201-300.tif	1	218	2462.01
Stack201-300.tif	1	219	2436.23
Stack201-300.tif	1	220	2438.1
Stack201-300.tif	1	221	2435.26
Stack201-300.tif	1	222	2446.02
Stack201-300.tif	1	223	2440.17
Stack201-300.tif	1	224	2438.29
Stack201-300.tif	1	225	2440.19
Stack201-300.tif	1	226	2439.56
Stack201-300.tif	1	227	2441.98
Stack201-300.tif	1	228	2447.59
Stack201-300.tif	1	229	2439.12
Stack201-300.tif	1	230	2437.15
Stack201-300.tif	1	231	2447.82
Stack201-300.tif	1	232	2438.92
Stack201-300.tif	1	233	2443.96
Stack201-300.tif	1	234	2428.63
Stack201-300.tif	1	235	2440.67
Stack201-300.tif	1	236	2429
Stack201-300.tif	1	237	2440.86
Stack201-300.tif	1	238	2431.04
Stack201-300.tif	1	239	2438.03
Stack201-300.tif	1	240	2430.74
Stack201-300.tif	1	241	2430.58
Stack201-300.tif	1	242	2429.6
Stack201-300.tif	1	243	2438.15
Stack201-300.tif	1	244	2450
Stack201-300.tif	1	245	2434.79
Stack201-300.tif	1	246	2435.79
Stack201-300.tif	1	247	2440.13
Stack201-300.tif	1	248	2443.38
Stack201-300.tif	1	249	2431.16
Stack201-300.tif	1	250	2432.84
Stack201-300.tif	1	251	2443.1
Stack201-300.tif	1	252	2436.58
Stack201-300.tif	1	253	2423.11
Stack201-300.tif	1	254	2413.01
Stack201-300.tif	1	255	2418.24
Stack201-300.tif	1	256	2433.53
Stack201-300.tif	1	257	2435.55
Stack201-300.tif	1	258	2431.35
Stack201-300.tif	1	259	2420.18
Stack201-300.tif	1	260	2429.24
Stack201-300.tif	1	261	2432.33
Stack201-300.tif	1	262	2427.51
Stack201-300.tif	1	263	2435.17
Stack201-300.tif	1	264	2434.84
Stack201-300.tif	1	265	2429.42
Stack201-300.tif	1	266	2428
Stack201-300.tif	1	267	2435.49
Stack201-300.tif	1	268	2445.82
Stack201-300.tif	1	269	2418.44
Stack201-300.tif	1	270	2425.68
Stack201-300.tif	1	271	2433.35
Stack201-300.tif	1	272	2430.61
Stack201-300.tif	1	273	2429.78
Stack201-300.tif	1	274	2433.34
Stack201-300.tif	1	275	2428.06
Stack201-300.tif	1	276	2435.53
Stack201-300.tif	1	277	2440.51
Stack201-300.tif	1	278	2430.78
Stack201-300.tif	1	279	2432.91
Stack201-300.tif	1	280	2431.66
Stack201-300.tif	1	281	2415.06
Stack201-300.tif	1	282	2418.78
Stack201-300.tif	1	283	2432.91
Stack201-300.tif	1	284	2421.83
Stack201-300.tif	1	285	2432.92
Stack201-300.tif	1	286	2434.21
Stack201-300.tif	1	287	2434.92
Stack201-300.tif	1	288	2432.99
Stack201-300.tif	1	289	2419.94
Stack201-300.tif	1	290	2436.13
Stack201-300.tif	1	291	2424.13
Stack201-300.tif	1	292	2430.76
Stack201-300.tif	1	293	2437.99
Stack201-300.tif	1	294	2423.62
Stack201-300.tif	1	295	2421.65
Stack201-300.tif	1	296	2429.23
Stack201-300.tif	1	297	2421.11
Stack201-300.tif	1	298	2425.53
Stack201-300.tif	1	299	2428.62
Stack201-300.tif	1	300	2417.11
Stack301-389.tif	1	301	2438.47
Stack301-389.tif	1	302	2431.93
Stack301-389.tif	1	303	2424.7
Stack301-389.tif	1	304	2415.89
Stack301-389.tif	1	305	2413.65
Stack301-389.tif	1	306	2425.75
Stack301-389.tif	1	307	2422.07
Stack301-389.tif	1	308	2410.02
Stack301-389.tif	1	309	2413.03
Stack301-389.tif	1	310	2411.73
Stack301-389.tif	1	311	2412.5
Stack301-389.tif	1	312	2425.24
Stack301-389.tif	1	313	2423.96
Stack301-389.tif	1	314	2413.74
Stack301-389.tif	1	315	2423.71
Stack301-389.tif	1	316	2405.86
Stack301-389.tif	1	317	2415.7
Stack301-389.tif	1	318	2412.55
Stack301-389.tif	1	319	2417.12
Stack301-389.tif	1	320	2422.55
Stack301-389.tif	1	321	2427.62
Stack301-389.tif	1	322	2412.41
Stack301-389.tif	1	323	2411.17
Stack301-389.tif	1	324	2416.53
Stack301-389.tif	1	325	2419.55
Stack301-389.tif	1	326	2421.58
Stack301-389.tif	1	327	2403.75
Stack301-389.tif	1	328	2416.51
Stack301-389.tif	1	329	2423.55
Stack301-389.tif	1	330	2412.19
Stack301-389.tif	1	331	2400.67
Stack301-389.tif	1	332	2416.55
Stack301-389.tif	1	333	2423.34
Stack301-389.tif	1	334	2410.51
Stack301-389.tif	1	335	2407.48
Stack301-389.tif	1	336	2417.84
Stack301-389.tif	1	337	2392.09
Stack301-389.tif	1	338	2408.79
Stack301-389.tif	1	339	2407.09
Stack301-389.tif	1	340	2410.77
Stack301-389.tif	1	341	2388.24
Stack301-389.tif	1	342	2404.45
Stack301-389.tif	1	343	2401.22
Stack301-389.tif	1	344	2405.79
Stack301-389.tif	1	345	2408.16
Stack301-389.tif	1	346	2407.97
Stack301-389.tif	1	347	2409.46
Stack301-389.tif	1	348	2393.92
Stack301-389.tif	1	349	2415.28
Stack301-389.tif	1	350	2396.17
Stack301-389.tif	1	351	2404.98
Stack301-389.tif	1	352	2411.4
Stack301-389.tif	1	353	2410.03
Stack301-389.tif	1	354	2401.94
Stack301-389.tif	1	355	2406.59
Stack301-389.tif	1	356	2404.76
Stack301-389.tif	1	357	2400.97
Stack301-389.tif	1	358	2394.77
Stack301-389.tif	1	359	2412.19
Stack301-389.tif	1	360	2400.16
Stack301-389.tif	1	361	2386.23
Stack301-389.tif	1	362	2392.35
Stack301-389.tif	1	363	2406.02
Stack301-389.tif	1	364	2398.83
Stack301-389.tif	1	365	2387.83
Stack301-389.tif	1	366	2399.29
Stack301-389.tif	1	367	2397.76
Stack301-389.tif	1	368	2396.21
Stack301-389.tif	1	369	2390.8
Stack301-389.tif	1	370	2399.37
Stack301-389.tif	1	371	2389.09
Stack301-389.tif	1	372	2401.72
Stack301-389.tif	1	373	2384.82
Stack301-389.tif	1	374	2395.75
Stack301-389.tif	1	375	2394.22
Stack301-389.tif	1	376	2400.47
Stack301-389.tif	1	377	2397.9
Stack301-389.tif	1	378	2388.15
Stack301-389.tif	1	379	2393.03
Stack301-389.tif	1	380	2383.05
Stack301-389.tif	1	381	2393.84
Stack301-389.tif	1	382	2391.52
Stack301-389.tif	1	383	2399.31
Stack301-389.tif	1	384	2394.92
Stack301-389.tif	1	385	2375.05
Stack301-389.tif	1	386	2390.53
Stack301-389.tif	1	387	2392.04
Stack301-389.tif	1	388	2410.87
Stack301-389.tif	1	389	2375.4
Stack1-100.tif	2	1	2335.62
Stack1-100.tif	2	2	2349.25
Stack1-100.tif	2	3	2332.61
Stack1-100.tif	2	4	2344.62
Stack1-100.tif	2	5	2348.61
Stack1-100.tif	2	6	2328.92
Stack1-100.tif	2	7	2342.04
Stack1-100.tif	2	8	2334.08
Stack1-100.tif	2	9	2338.65
Stack1-100.tif	2	10	2334.43
Stack1-100.tif	2	11	2332.14
Stack1-100.tif	2	12	2338.96
Stack1-100.tif	2	13	2324.48
Stack1-100.tif	2	14	2328.95
Stack1-100.tif	2	15	2332.52
Stack1-100.tif	2	16	2367.45
Stack1-100.tif	2	17	254.33
Stack1-100.tif	2	18	968.385
Stack1-100.tif	2	19	2387.76
Stack1-100.tif	2	20	3292.75
Stack1-100.tif	2	21	3062.6
Stack1-100.tif	2	22	2358.56
Stack1-100.tif	2	23	2630.54
Stack1-100.tif	2	24	2313.53
Stack1-100.tif	2	25	2078.39
Stack1-100.tif	2	26	2250.69
Stack1-100.tif	2	27	2341.77
Stack1-100.tif	2	28	405.154
Stack1-100.tif	2	29	1813.02
Stack1-100.tif	2	30	2386.72
Stack1-100.tif	2	31	2352.54
Stack1-100.tif	2	32	2291.17
Stack1-100.tif	2	33	2260.83
Stack1-100.tif	2	34	4515.1
Stack1-100.tif	2	35	4593.97
Stack1-100.tif	2	36	4608.85
Stack1-100.tif	2	37	2951.72
Stack1-100.tif	2	38	2511.79
Stack1-100.tif	2	39	-101.873
Stack1-100.tif	2	40	3656.05
Stack1-100.tif	2	41	4284.37
Stack1-100.tif	2	42	3892.4
Stack1-100.tif	2	43	4061.12
Stack1-100.tif	2	44	2255.66
Stack1-100.tif	2	45	2291.13
Stack1-100.tif	2	46	582.299
Stack1-100.tif	2	47	2400.95
Stack1-100.tif	2	48	2349.76
Stack1-100.tif	2	49	2363.74
Stack1-100.tif	2	50	2366.1
Stack1-100.tif	2	51	2376.93
Stack1-100.tif	2	52	2366.72
Stack1-100.tif	2	53	2377.56
Stack1-100.tif	2	54	2376.85
Stack1-100.tif	2	55	2360.29
Stack1-100.tif	2	56	2376.67
Stack1-100.tif	2	57	2366.92
Stack1-100.tif	2	58	2368.74
Stack1-100.tif	2	59	2360.15
Stack1-100.tif	2	60	2371.64
Stack1-100.tif	2	61	2359.45
Stack1-100.tif	2	62	2459.54
Stack1-100.tif	2	63	2950.94
Stack1-100.tif	2	64	115.389
Stack1-100.tif	2	65	406.701
Stack1-100.tif	2	66	2457.09
Stack1-100.tif	2	67	2447.06
Stack1-100.tif	2	68	2974.17
Stack1-100.tif	2	69	2349.52
Stack1-100.tif	2	70	2303.31
Stack1-100.tif	2	71	2067.27
Stack1-100.tif	2	72	2232.99
Stack1-100.tif	2	73	2379.26
Stack1-100.tif	2	74	2124.61
Stack1-100.tif	2	75	3353.4
Stack1-100.tif	2	76	2197.65
Stack1-100.tif	2	77	2123.81
Stack1-100.tif	2	78	2214.45
Stack1-100.tif	2	79	2250.36
Stack1-100.tif	2	80	1726.17
Stack1-100.tif	2	81	2337.99
Stack1-100.tif	2	82	2303.58
Stack1-100.tif	2	83	2355.83
Stack1-100.tif	2	84	2349.07
Stack1-100.tif	2	85	2187.84
Stack1-100.tif	2	86	2394.31
Stack1-100.tif	2	87	2402.6
Stack1-100.tif	2	88	2425.84
Stack1-100.tif	2	89	2433.94
Stack1-100.tif	2	90	2461.26
Stack1-100.tif	2	91	2477.66
Stack1-100.tif	2	92	3298.15
Stack1-100.tif	2	93	3326.76
Stack1-100.tif	2	94	2525.91
Stack1-100.tif	2	95	2545.16
Stack1-100.tif	2	96	2544.93
Stack1-100.tif	2	97	2563.92
Stack1-100.tif	2	98	2584.97
Stack1-100.tif	2	99	2575.78
Stack1-100.tif	2	100	2583.81
Stack101-200.tif	2	101	2596.71
Stack101-200.tif	2	102	2609.82
Stack101-200.tif	2	103	2618.39
Stack101-200.tif	2	104	2625.48
Stack101-200.tif	2	105	2639.98
Stack101-200.tif	2	106	2632.18
Stack101-200.tif	2	107	2638.81
Stack101-200.tif	2	108	2651.35
Stack101-200.tif	2	109	2650.46
Stack101-200.tif	2	110	2501.89
Stack101-200.tif	2	111	2651.56
Stack101-200.tif	2	112	2649.16
Stack101-200.tif	2	113	2472.96
Stack101-200.tif	2	114	2670.86
Stack101-200.tif	2	115	2683.89
Stack101-200.tif	2	116	2556.31
Stack101-200.tif	2	117	2673.21
Stack101-200.tif	2	118	2688.56
Stack101-200.tif	2	119	2681.99
Stack101-200.tif	2	120	2678.84
Stack101-200.tif	2	121	2686.01
Stack101-200.tif	2	122	2669.88
Stack101-200.tif	2	123	2676.84
Stack101-200.tif	2	124	2706.2
Stack101-200.tif	2	125	2686.79
Stack101-200.tif	2	126	2677.82
Stack101-200.tif	2	127	2688.2
Stack101-200.tif	2	128	2686.44
Stack101-200.tif	2	129	2705.28
Stack101-200.tif	2	130	2681.58
Stack101-200.tif	2	131	2693.57
Stack101-200.tif	2	132	2676.42
Stack101-200.tif	2	133	2680.57
Stack101-200.tif	2	134	2698.11
Stack101-200.tif	2	135	2696.59
Stack101-200.tif	2	136	2685.94
Stack101-200.tif	2	137	2698.92
Stack101-200.tif	2	138	2700.45
Stack101-200.tif	2	139	2707.47
Stack101-200.tif	2	140	3462.38
Stack101-200.tif	2	141	2677.74
Stack101-200.tif	2	142	2685.5
Stack101-200.tif	2	143	2691.84
Stack101-200.tif	2	144	2684.09
Stack101-200.tif	2	145	2684.76
Stack101-200.tif	2	146	2694.88
Stack101-200.tif	2	147	2691.83
Stack101-200.tif	2	148	2689.13
Stack101-200.tif	2	149	2706.68
Stack101-200.tif	2	150	2692.11
Stack101-200.tif	2	151	2686.42
Stack101-200.tif	2	152	2691.83
Stack101-200.tif	2	153	2696.67
Stack101-200.tif	2	154	2701.73
Stack101-200.tif	2	155	2685.24
Stack101-200.tif	2	156	2682.23
Stack101-200.tif	2	157	2691.56
Stack101-200.tif	2	158	2690.79
Stack101-200.tif	2	159	2685.08
Stack101-200.tif	2	160	2697.81
Stack101-200.tif	2	161	2701.04
Stack101-200.tif	2	162	2697.03
Stack101-200.tif	2	163	2691.08
Stack101-200.tif	2	164	2700.06
Stack101-200.tif	2	165	2686.08
Stack101-200.tif	2	166	2700
Stack101-200.tif	2	167	2693.82
Stack101-200.tif	2	168	2676.54
Stack101-200.tif	2	169	2690.26
Stack101-200.tif	2	170	2690.26
Stack101-200.tif	2	171	2690.58
Stack101-200.tif	2	172	2676.97
Stack101-200.tif	2	173	2687.02
Stack101-200.tif	2	174	2694.39
Stack101-200.tif	2	175	2678.15
Stack101-200.tif	2	176	2676.03
Stack101-200.tif	2	177	2672.35
Stack101-200.tif	2	178	2686.57
Stack101-200.tif	2	179	2670.44
Stack101-200.tif	2	180	2681.18
Stack101-200.tif	2	181	2667.73
Stack101-200.tif	2	182	2671.74
Stack101-200.tif	2	183	2659.34
Stack101-200.tif	2	184	2672.52
Stack101-200.tif	2	185	2674.03
Stack101-200.tif	2	186	2660.93
Stack101-200.tif	2	187	2654.44
Stack101-200.tif	2	188	2658.27
Stack101-200.tif	2	189	2658.83
Stack101-200.tif	2	190	2654.52
Stack101-200.tif	2	191	2651.32
Stack101-200.tif	2	192	2654.95
Stack101-200.tif	2	193	2660.18
Stack101-200.tif	2	194	2659.71
Stack101-200.tif	2	195	2656.03
Stack101-200.tif	2	196	2661.19
Stack101-200.tif	2	197	2652.13
Stack101-200.tif	2	198	2660.28
Stack101-200.tif	2	199	2649.96
Stack101-200.tif	2	200	2639.3
Stack201-300.tif	2	201	2655.78
Stack201-300.tif	2	202	2640.63
Stack201-300.tif	2	203	2632.78
Stack201-300.tif	2	204	2638.84
Stack201-300.tif	2	205	2633.58
Stack201-300.tif	2	206	2624.56
Stack201-300.tif	2	207	2636.04
Stack201-300.tif	2	208	2651
Stack201-300.tif	2	209	2644.29
Stack201-300.tif	2	210	2637.98
Stack201-300.tif	2	211	2634.91
Stack201-300.tif	2	212	2635.6
Stack201-300.tif	2	213	2636.17
Stack201-300.tif	2	214	2638.23
Stack201-300.tif	2	215	2634.85
Stack201-300.tif	2	216	2637.99
Stack201-300.tif	2	217	2629.16
Stack201-300.tif	2	218	2639.83
Stack201-300.tif	2	219	2636.06
Stack201-300.tif	2	220	2642.52
Stack201-300.tif	2	221	2639.36
Stack201-300.tif	2	222	2644.43
Stack201-300.tif	2	223	2645.25
Stack201-300.tif	2	224	2645.57
Stack201-300.tif	2	225	2632.6
Stack201-300.tif	2	226	2632.44
Stack201-300.tif	2	227	2634.83
Stack201-300.tif	2	228	2630.68
Stack201-300.tif	2	229	2644.65
Stack201-300.tif	2	230	2639.23
Stack201-300.tif	2	231	2643.17
Stack201-300.tif	2	232	2633.76
Stack201-300.tif	2	233	2618.4
Stack201-300.tif	2	234	2630.36
Stack201-300.tif	2	235	2650.25
Stack201-300.tif	2	236	2631.78
Stack201-300.tif	2	237	2627.79
Stack201-300.tif	2	238	2634.39
Stack201-300.tif	2	239	2637.58
Stack201-300.tif	2	240	2635.88
Stack201-300.tif	2	241	2608.16
Stack201-300.tif	2	242	2623.93
Stack201-300.tif	2	243	2615.97
Stack201-300.tif	2	244	2625.76
Stack201-300.tif	2	245	2611.94
Stack201-300.tif	2	246	2621.75
Stack201-300.tif	2	247	2623.01
Stack201-300.tif	2	248	2623.58
Stack201-300.tif	2	249	2609.21
Stack201-300.tif	2	250	2607.36
Stack201-300.tif	2	251	2608.69
Stack201-300.tif	2	252	2596.02
Stack201-300.tif	2	253	2606.53
Stack201-300.tif	2	254	2602.3
Stack201-300.tif	2	255	2602.63
Stack201-300.tif	2	256	2603.33
Stack201-300.tif	2	257	2601.03
Stack201-300.tif	2	258	2604.92
Stack201-300.tif	2	259	2583.26
Stack201-300.tif	2	260	2598.87
Stack201-300.tif	2	261	2595.72
Stack201-300.tif	2	262	2592.81
Stack201-300.tif	2	263	2589.35
Stack201-300.tif	2	264	2568
Stack201-300.tif	2	265	2580.26
Stack201-300.tif	2	266	2573.65
Stack201-300.tif	2	267	2575.07
Stack201-300.tif	2	268	2578
Stack201-300.tif	2	269	2575.38
Stack201-300.tif	2	270	2570.64
Stack201-300.tif	2	271	2570.14
Stack201-300.tif	2	272	2566.4
Stack201-300.tif	2	273	2559.16
Stack201-300.tif	2	274	2549.97
Stack201-300.tif	2	275	2547.02
Stack201-300.tif	2	276	2561.1
Stack201-300.tif	2	277	2557.85
Stack201-300.tif	2	278	2563.36
Stack201-300.tif	2	279	2545.58
Stack201-300.tif	2	280	2558.33
Stack201-300.tif	2	281	2551.01
Stack201-300.tif	2	282	2554.41
Stack201-300.tif	2	283	2548.32
Stack201-300.tif	2	284	2557.88
Stack201-300.tif	2	285	2543.8
Stack201-300.tif	2	286	2544.27
Stack201-300.tif	2	287	2554.65
Stack201-300.tif	2	288	2536.91
Stack201-300.tif	2	289	2555.14
Stack201-300.tif	2	290	2534.05
Stack201-300.tif	2	291	2533.2
Stack201-300.tif	2	292	2539.35
Stack201-300.tif	2	293	2545.64
Stack201-300.tif	2	294	2542.37
Stack201-300.tif	2	295	2525.16
Stack201-300.tif	2	296	2535.05
Stack201-300.tif	2	297	2520.36
Stack201-300.tif	2	298	2539.01
Stack201-300.tif	2	299	2507.18
Stack201-300.tif	2	300	2526.45
Stack301-389.tif	2	301	2526.59
Stack301-389.tif	2	302	2524.6
Stack301-389.tif	2	303	2527.78
Stack301-389.tif	2	304	2519.86
Stack301-389.tif	2	305	2519.82
Stack301-389.tif	2	306	2517.03
Stack301-389.tif	2	307	2511.05
Stack301-389.tif	2	308	2505.46
Stack301-389.tif	2	309	2508.43
Stack301-389.tif	2	310	2513.98
Stack301-389.tif	2	311	2516.15
Stack301-389.tif	2	312	2507.33
Stack301-389.tif	2	313	2508.3
Stack301-389.tif	2	314	2498.09
Stack301-389.tif	2	315	2500.72
Stack301-389.tif	2	316	2495.92
Stack301-389.tif	2	317	2493.33
Stack301-389.tif	2	318	2484.44
Stack301-389.tif	2	319	2490.63
Stack301-389.tif	2	320	2487.62
Stack301-389.tif	2	321	2488.7
Stack301-389.tif	2	322	2484.96
Stack301-389.tif	2	323	2482.79
Stack301-389.tif	2	324	2489.38
Stack301-389.tif	2	325	2462.5
Stack301-389.tif	2	326	2472.93
Stack301-389.tif	2	327	2470.76
Stack301-389.tif	2	328	2483.56
Stack301-389.tif	2	329	2466.55
Stack301-389.tif	2	330	2477.78
Stack301-389.tif	2	331	2466.48
Stack301-389.tif	2	332	2468.07
Stack301-389.tif	2	333	2467.12
Stack301-389.tif	2	334	2468.02
Stack301-389.tif	2	335	2466.54
Stack301-389.tif	2	336	2467.43
Stack301-389.tif	2	337	2465.27
Stack301-389.tif	2	338	2469.29
Stack301-389.tif	2	339	2442.34
Stack301-389.tif	2	340	2462
Stack301-389.tif	2	341	2459.7
Stack301-389.tif	2	342	2471.56
Stack301-389.tif	2	343	2449.51
Stack301-389.tif	2	344	2456.74
Stack301-389.tif	2	345	2456.14
Stack301-389.tif	2	346	2449.57
Stack301-389.tif	2	347	2462.4
Stack301-389.tif	2	348	2457.85
Stack301-389.tif	2	349	2457.88
Stack301-389.tif	2	350	2439.64
Stack301-389.tif	2	351	2459.99
Stack301-389.tif	2	352	2451.97
Stack301-389.tif	2	353	2448.1
Stack301-389.tif	2	354	2440.67
Stack301-389.tif	2	355	2445.84
Stack301-389.tif	2	356	2445.33
Stack301-389.tif	2	357	2453.32
Stack301-389.tif	2	358	2446.4
Stack301-389.tif	2	359	2456.07
Stack301-389.tif	2	360	2437.03
Stack301-389.tif	2	361	2435.23
Stack301-389.tif	2	362	2448.5
Stack301-389.tif	2	363	2439.77
Stack301-389.tif	2	364	2428.73
Stack301-389.tif	2	365	2446.21
Stack301-389.tif	2	366	2431.38
Stack301-389.tif	2	367	2443.81
Stack301-389.tif	2	368	2422.92
Stack301-389.tif	2	369	2436.23
Stack301-389.tif	2	370	2438.75
Stack301-389.tif	2	371	2439.46
Stack301-389.tif	2	372	2434.54
Stack301-389.tif	2	373	2416.29
Stack301-389.tif	2	374	2418.43
Stack301-389.tif	2	375	2410.94
Stack301-389.tif	2	376	2426.25
Stack301-389.tif	2	377	2438.44
Stack301-389.tif	2	378	2426.82
Stack301-389.tif	2	379	2434.41
Stack301-389.tif	2	380	2426.51
Stack301-389.tif	2	381	2438.01
Stack301-389.tif	2	382	2425.79
Stack301-389.tif	2	383	2415.81
Stack301-389.tif	2	384	2416.79
Stack301-389.tif	2	385	2432.42
Stack301-389.tif	2	386	2411.73
Stack301-389.tif	2	387	2417.86
Stack301-389.tif	2	388	2418.87
Stack301-389.tif	2	389	2407.45
Stack1-100.tif	3	1	1707.13
Stack1-100.tif	3	2	1708.9
Stack1-100.tif	3	3	1695.56
Stack1-100.tif	3	4	1687.48
Stack1-100.tif	3	5	1700.38
Stack1-100.tif	3	6	1714.88
Stack1-100.tif	3	7	1705.99
Stack1-100.tif	3	8	1717.2
Stack1-100.tif	3	9	1702.03
Stack1-100.tif	3	10	1694.07
Stack1-100.tif	3	11	1705.18
Stack1-100.tif	3	12	1697.55
Stack1-100.tif	3	13	1693.66
Stack1-100.tif	3	14	1700.73
Stack1-100.tif	3	15	1704.67
Stack1-100.tif	3	16	1809.57
Stack1-100.tif	3	17	484.566
Stack1-100.tif	3	18	1233.73
Stack1-100.tif	3	19	1654.34
Stack1-100.tif	3	20	1731.47
Stack1-100.tif	3	21	1750.12
Stack1-100.tif	3	22	1743.71
Stack1-100.tif	3	23	1682.44
Stack1-100.tif	3	24	1727.76
Stack1-100.tif	3	25	1628.94
Stack1-100.tif	3	26	1732.31
Stack1-100.tif	3	27	1734.57
Stack1-100.tif	3	28	517.409
Stack1-100.tif	3	29	1415.2
Stack1-100.tif	3	30	1703.5
Stack1-100.tif	3	31	1717.68
Stack1-100.tif	3	32	1752.03
Stack1-100.tif	3	33	1847.29
Stack1-100.tif	3	34	1746.47
Stack1-100.tif	3	35	1740.02
Stack1-100.tif	3	36	1730.17
Stack1-100.tif	3	37	1511.2
Stack1-100.tif	3	38	1604.74
Stack1-100.tif	3	39	27.2973
Stack1-100.tif	3	40	1758.16
Stack1-100.tif	3	41	1756.02
Stack1-100.tif	3	42	1746.14
Stack1-100.tif	3	43	1747.71
Stack1-100.tif	3	44	1722.38
Stack1-100.tif	3	45	1752.61
Stack1-100.tif	3	46	841.032
Stack1-100.tif	3	47	1701.27
Stack1-100.tif	3	48	1746.02
Stack1-100.tif	3	49	1743.27
Stack1-100.tif	3	50	1731.33
Stack1-100.tif	3	51	1754.2
Stack1-100.tif	3	52	1731.56
Stack1-100.tif	3	53	1732.01
Stack1-100.tif	3	54	1729.86
Stack1-100.tif	3	55	1720.25
Stack1-100.tif	3	56	1730.78
Stack1-100.tif	3	57	1743.67
Stack1-100.tif	3	58	1739.77
Stack1-100.tif	3	59	1749.36
Stack1-100.tif	3	60	1739.01
Stack1-100.tif	3	61	1738.88
Stack1-100.tif	3	62	1738.74
Stack1-100.tif	3	63	1760.05
Stack1-100.tif	3	64	-48.0423
Stack1-100.tif	3	65	489.263
Stack1-100.tif	3	66	1684.5
Stack1-100.tif	3	67	1754.53
Stack1-100.tif	3	68	1735.09
Stack1-100.tif	3	69	2620.38
Stack1-100.tif	3	70	1754.33
Stack1-100.tif	3	71	1417.05
Stack1-100.tif	3	72	1898.87
Stack1-100.tif	3	73	1603.22
Stack1-100.tif	3	74	1786.54
Stack1-100.tif	3	75	2662.25
Stack1-100.tif	3	76	1992.31
Stack1-100.tif	3	77	1749.4
Stack1-100.tif	3	78	1691.18
Stack1-100.tif	3	79	1824.09
Stack1-100.tif	3	80	1759.94
Stack1-100.tif	3	81	1759.37
Stack1-100.tif	3	82	1745.16
Stack1-100.tif	3	83	1755.72
Stack1-100.tif	3	84	1776.99
Stack1-100.tif	3	85	1774.39
Stack1-100.tif	3	86	1797.09
Stack1-100.tif	3	87	1807.39
Stack1-100.tif	3	88	1782.74
Stack1-100.tif	3	89	1998.84
Stack1-100.tif	3	90	1834.38
Stack1-100.tif	3	91	1852.86
Stack1-100.tif	3	92	1848.61
Stack1-100.tif	3	93	1860.57
Stack1-100.tif	3	94	1866.68
Stack1-100.tif	3	95	1885.77
Stack1-100.tif	3	96	1755.53
Stack1-100.tif	3	97	1930.69
Stack1-100.tif	3	98	1920.15
Stack1-100.tif	3	99	1913.39
Stack1-100.tif	3	100	1922.97
Stack101-200.tif	3	101	1921.25
Stack101-200.tif	3	102	1925.7
Stack101-200.tif	3	103	1952.39
Stack101-200.tif	3	104	1942.73
Stack101-200.tif	3	105	1956.16
Stack101-200.tif	3	106	1950.29
Stack101-200.tif	3	107	1958.03
Stack101-200.tif	3	108	1971.26
Stack101-200.tif	3	109	1951.74
Stack101-200.tif	3	110	1960.98
Stack101-200.tif	3	111	1967.66
Stack101-200.tif	3	112	1881.52
Stack101-200.tif	3	113	1975.16
Stack101-200.tif	3	114	1977.01
Stack101-200.tif	3	115	1984.19
Stack101-200.tif	3	116	1976.73
Stack101-200.tif	3	117	1995.79
Stack101-200.tif	3	118	1982.92
Stack101-200.tif	3	119	1979.27
Stack101-200.tif	3	120	1994.74
Stack101-200.tif	3	121	1976.47
Stack101-200.tif	3	122	1992.55
Stack101-200.tif	3	123	1992.81
Stack101-200.tif	3	124	1994.04
Stack101-200.tif	3	125	2034.43
Stack101-200.tif	3	126	2009.72
Stack101-200.tif	3	127	1993.02
Stack101-200.tif	3	128	2003.09
Stack101-200.tif	3	129	1992.04
Stack101-200.tif	3	130	2008.45
Stack101-200.tif	3	131	2002.35
Stack101-200.tif	3	132	2004.48
Stack101-200.tif	3	133	2006.67
Stack101-200.tif	3	134	2007.56
Stack101-200.tif	3	135	2002.76
Stack101-200.tif	3	136	2008.02
Stack101-200.tif	3	137	2006.14
Stack101-200.tif	3	138	1999.73
Stack101-200.tif	3	139	1994.03
Stack101-200.tif	3	140	1997.48
Stack101-200.tif	3	141	2016.98
Stack101-200.tif	3	142	2011.36
Stack101-200.tif	3	143	1989.62
Stack101-200.tif	3	144	2009.51
Stack101-200.tif	3	145	2010.65
Stack101-200.tif	3	146	2014.95
Stack101-200.tif	3	147	2005.42
Stack101-200.tif	3	148	2017.44
Stack101-200.tif	3	149	2021.55
Stack101-200.tif	3	150	2021.78
Stack101-200.tif	3	151	2005.7
Stack101-200.tif	3	152	2009.57
Stack101-200.tif	3	153	2016.73
Stack101-200.tif	3	154	2015.52
Stack101-200.tif	3	155	2011.45
Stack101-200.tif	3	156	2020.24
Stack101-200.tif	3	157	2012.64
Stack101-200.tif	3	158	2021.31
Stack101-200.tif	3	159	2009.91
Stack101-200.tif	3	160	2027.66
Stack101-200.tif	3	161	2009.77
Stack101-200.tif	3	162	2024.17
Stack101-200.tif	3	163	2006.78
Stack101-200.tif	3	164	1994.95
Stack101-200.tif	3	165	2011.98
Stack101-200.tif	3	166	2006.28
Stack101-200.tif	3	167	2019.08
Stack101-200.tif	3	168	2012.7
Stack101-200.tif	3	169	2017.71
Stack101-200.tif	3	170	2013.26
Stack101-200.tif	3	171	2026.11
Stack101-200.tif	3	172	2015.16
Stack101-200.tif	3	173	2006.97
Stack101-200.tif	3	174	2008.4
Stack101-200.tif	3	175	2014.69
Stack101-200.tif	3	176	2010.18
Stack101-200.tif	3	177	2001.64
Stack101-200.tif	3	178	2013.49
Stack101-200.tif	3	179	2012.81
Stack101-200.tif	3	180	2004.52
Stack101-200.tif	3	181	2002.73
Stack101-200.tif	3	182	2004.74
Stack101-200.tif	3	183	2015.13
Stack101-200.tif	3	184	2011.92
Stack101-200.tif	3	185	2009.82
Stack101-200.tif	3	186	2015.94
Stack101-200.tif	3	187	2020.4
Stack101-200.tif	3	188	2008.19
Stack101-200.tif	3	189	2011.77
Stack101-200.tif	3	190	2000.25
Stack101-200.tif	3	191	2003.39
Stack101-200.tif	3	192	2029.37
Stack101-200.tif	3	193	2019.76
Stack101-200.tif	3	194	2019.04
Stack101-200.tif	3	195	2016.5
Stack101-200.tif	3	196	2008.01
Stack101-200.tif	3	197	2008.94
Stack101-200.tif	3	198	2009.43
Stack101-200.tif	3	199	2008.19
Stack101-200.tif	3	200	2012.45
Stack201-300.tif	3	201	1999.57
Stack201-300.tif	3	202	2000.29
Stack201-300.tif	3	203	1997.26
Stack201-300.tif	3	204	2002.89
Stack201-300.tif	3	205	2017.93
Stack201-300.tif	3	206	2003.88
Stack201-300.tif	3	207	2025.58
Stack201-300.tif	3	208	2019.34
Stack201-300.tif	3	209	2014.29
Stack201-300.tif	3	210	2015.02
Stack201-300.tif	3	211	2006.49
Stack201-300.tif	3	212	2008
Stack201-300.tif	3	213	2001.69
Stack201-300.tif	3	214	2006.8
Stack201-300.tif	3	215	1999.12
Stack201-300.tif	3	216	2016.92
Stack201-300.tif	3	217	2007.92
Stack201-300.tif	3	218	2005.16
Stack201-300.tif	3	219	2006.34
Stack201-300.tif	3	220	2008.55
Stack201-300.tif	3	221	2011.52
Stack201-300.tif	3	222	2012.15
Stack201-300.tif	3	223	2011.32
Stack201-300.tif	3	224	2010.58
Stack201-300.tif	3	225	2004.84
Stack201-300.tif	3	226	2009.85
Stack201-300.tif	3	227	1996.83
Stack201-300.tif	3	228	2003.26
Stack201-300.tif	3	229	2012.07
Stack201-300.tif	3	230	2008.5
Stack201-300.tif	3	231	2017.45
Stack201-300.tif	3	232	1995.94
Stack201-300.tif	3	233	2002.74
Stack201-300.tif	3	234	1999.9
Stack201-300.tif	3	235	1997.63
Stack201-300.tif	3	236	2000.8
Stack201-300.tif	3	237	2013.84
Stack201-300.tif	3	238	1998.67
Stack201-300.tif	3	239	1992.57
Stack201-300.tif	3	240	1992.15
Stack201-300.tif	3	241	1997.62
Stack201-300.tif	3	242	2001.17
Stack201-300.tif	3	243	2007.94
Stack201-300.tif	3	244	1991.8
Stack201-300.tif	3	245	2000.58
Stack201-300.tif	3	246	2007.54
Stack201-300.tif	3	247	1999.9
Stack201-300.tif	3	248	1991.69
Stack201-300.tif	3	249	1999.82
Stack201-300.tif	3	250	1996.16
Stack201-300.tif	3	251	1993.43
Stack201-300.tif	3	252	1994.32
Stack201-300.tif	3	253	1992.44
Stack201-300.tif	3	254	2007.84
Stack201-300.tif	3	255	2012.42
Stack201-300.tif	3	256	1999.71
Stack201-300.tif	3	257	2006.42
Stack201-300.tif	3	258	1995.41
Stack201-300.tif	3	259	1993.64
Stack201-300.tif	3	260	1992.35
Stack201-300.tif	3	261	1992.9
Stack201-300.tif	3	262	1996.66
Stack201-300.tif	3	263	1992.63
Stack201-300.tif	3	264	1982.87
Stack201-300.tif	3	265	1999.38
Stack201-300.tif	3	266	1986.62
Stack201-300.tif	3	267	1993.87
Stack201-300.tif	3	268	1995.64
Stack201-300.tif	3	269	1999.41
Stack201-300.tif	3	270	1989.24
Stack201-300.tif	3	271	1989.16
Stack201-300.tif	3	272	1985.81
Stack201-300.tif	3	273	1995.33
Stack201-300.tif	3	274	1989.58
Stack201-300.tif	3	275	1995.34
Stack201-300.tif	3	276	2008.06
Stack201-300.tif	3	277	2003.12
Stack201-300.tif	3	278	1991.07
Stack201-300.tif	3	279	2003.17
Stack201-300.tif	3	280	1995.32
Stack201-300.tif	3	281	1998.6
Stack201-300.tif	3	282	1991.62
Stack201-300.tif	3	283	1990.01
Stack201-300.tif	3	284	1986.61
Stack201-300.tif	3	285	1997.95
Stack201-300.tif	3	286	1999.42
Stack201-300.tif	3	287	1996.93
Stack201-300.tif	3	288	1991.98
Stack201-300.tif	3	289	1988.74
Stack201-300.tif	3	290	1987.63
Stack201-300.tif	3	291	1982.19
Stack201-300.tif	3	292	1992.99
Stack201-300.tif	3	293	1994.11
Stack201-300.tif	3	294	1992.47
Stack201-300.tif	3	295	1979.42
Stack201-300.tif	3	296	1970.84
Stack201-300.tif	3	297	1992.3
Stack201-300.tif	3	298	1981.2
Stack201-300.tif	3	299	1986.51
Stack201-300.tif	3	300	1988.91
Stack301-389.tif	3	301	1994.05
Stack301-389.tif	3	302	1982.76
Stack301-389.tif	3	303	1981.5
Stack301-389.tif	3	304	1969.05
Stack301-389.tif	3	305	1976.24
Stack301-389.tif	3	306	1981.97
Stack301-389.tif	3	307	1975.84
Stack301-389.tif	3	308	1977.04
Stack301-389.tif	3	309	1976.22
Stack301-389.tif	3	310	1964.44
Stack301-389.tif	3	311	1973.55
Stack301-389.tif	3	312	1978.28
Stack301-389.tif	3	313	1976.28
Stack301-389.tif	3	314	1968.79
Stack301-389.tif	3	315	1978.57
Stack301-389.tif	3	316	1980.17
Stack301-389.tif	3	317	1978.42
Stack301-389.tif	3	318	1965.87
Stack301-389.tif	3	319	1971.44
Stack301-389.tif	3	320	1974.87
Stack301-389.tif	3	321	1968.22
Stack301-389.tif	3	322	1974.32
Stack301-389.tif	3	323	1966.32
Stack301-389.tif	3	324	1972.86
Stack301-389.tif	3	325	1969.8
Stack301-389.tif	3	326	1970.8
Stack301-389.tif	3	327	1964.77
Stack301-389.tif	3	328	1977.04
Stack301-389.tif	3	329	1965.59
Stack301-389.tif	3	330	1956.06
Stack301-389.tif	3	331	1955.23
Stack301-389.tif	3	332	1967.46
Stack301-389.tif	3	333	1947.95
Stack301-389.tif	3	334	1962.24
Stack301-389.tif	3	335	1960.22
Stack301-389.tif	3	336	1961.44
Stack301-389.tif	3	337	1962.22
Stack301-389.tif	3	338	1952.93
Stack301-389.tif	3	339	1961.4
Stack301-389.tif	3	340	1943.43
Stack301-389.tif	3	341	1966.84
Stack301-389.tif	3	342	1946.59
Stack301-389.tif	3	343	1948.56
Stack301-389.tif	3	344	1939.93
Stack301-389.tif	3	345	1941.47
Stack301-389.tif	3	346	1956.85
Stack301-389.tif	3	347	1951.38
Stack301-389.tif	3	348	1950.79
Stack301-389.tif	3	349	1951.71
Stack301-389.tif	3	350	1956.68
Stack301-389.tif	3	351	1948.44
Stack301-389.tif	3	352	1950.04
Stack301-389.tif	3	353	1962.62
Stack301-389.tif	3	354	1955.97
Stack301-389.tif	3	355	1944.54
Stack301-389.tif	3	356	1947.39
Stack301-389.tif	3	357	1939.59
Stack301-389.tif	3	358	1941.4
Stack301-389.tif	3	359	1941.3
Stack301-389.tif	3	360	1946.34
Stack301-389.tif	3	361	1943.32
Stack301-389.tif	3	362	1935.52
Stack301-389.tif	3	363	1942.7
Stack301-389.tif	3	364	1942.53
Stack301-389.tif	3	365	1939.43
Stack301-389.tif	3	366	1935.28
Stack301-389.tif	3	367	1930.02
Stack301-389.tif	3	368	1935.47
Stack301-389.tif	3	369	1943.93
Stack301-389.tif	3	370	1932.17
Stack301-389.tif	3	371	1944.75
Stack301-389.tif	3	372	1931.22
Stack301-389.tif	3	373	1942.23
Stack301-389.tif	3	374	1918.12
Stack301-389.tif	3	375	1936.32
Stack301-389.tif	3	376	1930.87
Stack301-389.tif	3	377	1940.97
Stack301-389.tif	3	378	1929.94
Stack301-389.tif	3	379	1924.64
Stack301-389.tif	3	380	1938.97
Stack301-389.tif	3	381	1931.87
Stack301-389.tif	3	382	1920.31
Stack301-389.tif	3	383	1921.26
Stack301-389.tif	3	384	1924.03
Stack301-389.tif	3	385	1910.96
Stack301-389.tif	3	386	1900.21
Stack301-389.tif	3	387	1910.47
Stack301-389.tif	3	388	1911.47
Stack301-389.tif	3	389	1920
Stack1-100.tif	4	1	1568.1
Stack1-100.tif	4	2	1581.39
Stack1-100.tif	4	3	1568.57
Stack1-100.tif	4	4	1569.98
Stack1-100.tif	4	5	1573.32
Stack1-100.tif	4	6	1578.24
Stack1-100.tif	4	7	1562.25
Stack1-100.tif	4	8	1572.6
Stack1-100.tif	4	9	1569.8
Stack1-100.tif	4	10	1573.52
Stack1-100.tif	4	11	1573.01
Stack1-100.tif	4	12	1573.99
Stack1-100.tif	4	13	1566.28
Stack1-100.tif	4	14	1570.68
Stack1-100.tif	4	15	1583.29
Stack1-100.tif	4	16	1310.46
Stack1-100.tif	4	17	552.765
Stack1-100.tif	4	18	1306.39
Stack1-100.tif	4	19	1416.79
Stack1-100.tif	4	20	2534.87
Stack1-100.tif	4	21	1705.76
Stack1-100.tif	4	22	1610
Stack1-100.tif	4	23	1601.06
Stack1-100.tif	4	24	1611.05
Stack1-100.tif	4	25	1601.94
Stack1-100.tif	4	26	1570.17
Stack1-100.tif	4	27	1470.47
Stack1-100.tif	4	28	607.65
Stack1-100.tif	4	29	2107.29
Stack1-100.tif	4	30	1569.35
Stack1-100.tif	4	31	1609.58
Stack1-100.tif	4	32	1548.81
Stack1-100.tif	4	33	3081.57
Stack1-100.tif	4	34	1617.23
Stack1-100.tif	4	35	1616.18
Stack1-100.tif	4	36	1611.73
Stack1-100.tif	4	37	1521.16
Stack1-100.tif	4	38	1665.93
Stack1-100.tif	4	39	31.1419
Stack1-100.tif	4	40	1607.25
Stack1-100.tif	4	41	1614.07
Stack1-100.tif	4	42	1614.6
Stack1-100.tif	4	43	1614.62
Stack1-100.tif	4	44	1620.31
Stack1-100.tif	4	45	1626.76
Stack1-100.tif	4	46	424.111
Stack1-100.tif	4	47	1604.04
Stack1-100.tif	4	48	1621.14
Stack1-100.tif	4	49	1617.61
Stack1-100.tif	4	50	1603.17
Stack1-100.tif	4	51	1620.82
Stack1-100.tif	4	52	1608.43
Stack1-100.tif	4	53	1613.52
Stack1-100.tif	4	54	1618.59
Stack1-100.tif	4	55	1631.34
Stack1-100.tif	4	56	1626.22
Stack1-100.tif	4	57	1610.74
Stack1-100.tif	4	58	1621.04
Stack1-100.tif	4	59	1610.77
Stack1-100.tif	4	60	1621.87
Stack1-100.tif	4	61	1569.75
Stack1-100.tif	4	62	1618.11
Stack1-100.tif	4	63	1615.2
Stack1-100.tif	4	64	-76.3224
Stack1-100.tif	4	65	811.733
Stack1-100.tif	4	66	1718.66
Stack1-100.tif	4	67	1565.07
Stack1-100.tif	4	68	1326.94
Stack1-100.tif	4	69	2291.74
Stack1-100.tif	4	70	1628.74
Stack1-100.tif	4	71	1619.79
Stack1-100.tif	4	72	1609.4
Stack1-100.tif	4	73	1631.73
Stack1-100.tif	4	74	3315.96
Stack1-100.tif	4	75	1801.66
Stack1-100.tif	4	76	4062.4
Stack1-100.tif	4	77	2184.08
Stack1-100.tif	4	78	2040.22
Stack1-100.tif	4	79	1642.98
Stack1-100.tif	4	80	1639.96
Stack1-100.tif	4	81	1456.45
Stack1-100.tif	4	82	1597.09
Stack1-100.tif	4	83	1632.93
Stack1-100.tif	4	84	1643.53
Stack1-100.tif	4	85	2336.75
Stack1-100.tif	4	86	1684.68
Stack1-100.tif	4	87	1691.12
Stack1-100.tif	4	88	1688.76
Stack1-100.tif	4	89	1699.13
Stack1-100.tif	4	90	1606.7
Stack1-100.tif	4	91	1729.12
Stack1-100.tif	4	92	1693.4
Stack1-100.tif	4	93	1749.31
Stack1-100.tif	4	94	1750.41
Stack1-100.tif	4	95	1707.83
Stack1-100.tif	4	96	1751.86
Stack1-100.tif	4	97	1775.01
Stack1-100.tif	4	98	1795.47
Stack1-100.tif	4	99	1743.53
Stack1-100.tif	4	100	1793.31
Stack101-200.tif	4	101	1767.81
Stack101-200.tif	4	102	1797.58
Stack101-200.tif	4	103	1797.37
Stack101-200.tif	4	104	1805.08
Stack101-200.tif	4	105	1791.22
Stack101-200.tif	4	106	1797.34
Stack101-200.tif	4	107	1792.48
Stack101-200.tif	4	108	1789.84
Stack101-200.tif	4	109	1801.71
Stack101-200.tif	4	110	1755.97
Stack101-200.tif	4	111	1818.45
Stack101-200.tif	4	112	1819.47
Stack101-200.tif	4	113	2664.95
Stack101-200.tif	4	114	1838.55
Stack101-200.tif	4	115	1821.69
Stack101-200.tif	4	116	1809.73
Stack101-200.tif	4	117	3785.16
Stack101-200.tif	4	118	1806.29
Stack101-200.tif	4	119	1834.33
Stack101-200.tif	4	120	1832
Stack101-200.tif	4	121	1817.03
Stack101-200.tif	4	122	1816.91
Stack101-200.tif	4	123	2477.8
Stack101-200.tif	4	124	1835.28
Stack101-200.tif	4	125	1840.37
Stack101-200.tif	4	126	1822.61
Stack101-200.tif	4	127	1829.56
Stack101-200.tif	4	128	1832.91
Stack101-200.tif	4	129	1827.01
Stack101-200.tif	4	130	1835.87
Stack101-200.tif	4	131	1847.02
Stack101-200.tif	4	132	1845.24
Stack101-200.tif	4	133	1849.88
Stack101-200.tif	4	134	1832.85
Stack101-200.tif	4	135	1825.08
Stack101-200.tif	4	136	1844.69
Stack101-200.tif	4	137	1850.33
Stack101-200.tif	4	138	1827.38
Stack101-200.tif	4	139	1838.75
Stack101-200.tif	4	140	1835.41
Stack101-200.tif	4	141	1831.9
Stack101-200.tif	4	142	1848.13
Stack101-200.tif	4	143	1845.57
Stack101-200.tif	4	144	1842.51
Stack101-200.tif	4	145	1838.29
Stack101-200.tif	4	146	1845.52
Stack101-200.tif	4	147	1839.1
Stack101-200.tif	4	148	1832.45
Stack101-200.tif	4	149	1841.51
Stack101-200.tif	4	150	1842.49
Stack101-200.tif	4	151	1830.91
Stack101-200.tif	4	152	1822
Stack101-200.tif	4	153	1839.85
Stack101-200.tif	4	154	1839.15
Stack101-200.tif	4	155	1842.33
Stack101-200.tif	4	156	1843.11
Stack101-200.tif	4	157	1846.13
Stack101-200.tif	4	158	1825.49
Stack101-200.tif	4	159	1839.06
Stack101-200.tif	4	160	1845.94
Stack101-200.tif	4	161	1846.69
Stack101-200.tif	4	162	1834.38
Stack101-200.tif	4	163	1842.7
Stack101-200.tif	4	164	1833.1
Stack101-200.tif	4	165	1836.75
Stack101-200.tif	4	166	1849.08
Stack101-200.tif	4	167	1850.9
Stack101-200.tif	4	168	1847.39
Stack101-200.tif	4	169	1830.85
Stack101-200.tif	4	170	1844.23
Stack101-200.tif	4	171	1839.18
Stack101-200.tif	4	172	1840.67
Stack101-200.tif	4	173	1845.64
Stack101-200.tif	4	174	1835.41
Stack101-200.tif	4	175	1848.06
Stack101-200.tif	4	176	1833.34
Stack101-200.tif	4	177	1848.33
Stack101-200.tif	4	178	1839.22
Stack101-200.tif	4	179	1835.13
Stack101-200.tif	4	180	1846.44
Stack101-200.tif	4	181	1828.99
Stack101-200.tif	4	182	1836.07
Stack101-200.tif	4	183	1857.58
Stack101-200.tif	4	184	1853.81
Stack101-200.tif	4	185	1826.6
Stack101-200.tif	4	186	1850.01
Stack101-200.tif	4	187	1834.59
Stack101-200.tif	4	188	1838.14
Stack101-200.tif	4	189	1829.87
Stack101-200.tif	4	190	1829.89
Stack101-200.tif	4	191	1839.24
Stack101-200.tif	4	192	1843.24
Stack101-200.tif	4	193	1835.05
Stack101-200.tif	4	194	1844.28
Stack101-200.tif	4	195	1836.4
Stack101-200.tif	4	196	1831.66
Stack101-200.tif	4	197	1835.99
Stack101-200.tif	4	198	1847.14
Stack101-200.tif	4	199	1825.04
Stack101-200.tif	4	200	1817.43
Stack201-300.tif	4	201	1833.27
Stack201-300.tif	4	202	1823.95
Stack201-300.tif	4	203	1845.33
Stack201-300.tif	4	204	1832.83
Stack201-300.tif	4	205	1836.91
Stack201-300.tif	4	206	1825.74
Stack201-300.tif	4	207	1840.21
Stack201-300.tif	4	208	2805.04
Stack201-300.tif	4	209	3358
Stack201-300.tif	4	210	1906.27
Stack201-300.tif	4	211	1834.94
Stack201-300.tif	4	212	1835.02
Stack201-300.tif	4	213	1831.9
Stack201-300.tif	4	214	1828.55
Stack201-300.tif	4	215	1831.49
Stack201-300.tif	4	216	1841.31
Stack201-300.tif	4	217	1832.89
Stack201-300.tif	4	218	1819.88
Stack201-300.tif	4	219	1823.87
Stack201-300.tif	4	220	1839.07
Stack201-300.tif	4	221	1841.55
Stack201-300.tif	4	222	1821.81
Stack201-300.tif	4	223	1824.38
Stack201-300.tif	4	224	1822.89
Stack201-300.tif	4	225	1824.5
Stack201-300.tif	4	226	1830.66
Stack201-300.tif	4	227	1835.51
Stack201-300.tif	4	228	1828.54
Stack201-300.tif	4	229	1832.42
Stack201-300.tif	4	230	1818.7
Stack201-300.tif	4	231	1840.59
Stack201-300.tif	4	232	1839.98
Stack201-300.tif	4	233	1816.57
Stack201-300.tif	4	234	1822.69
Stack201-300.tif	4	235	1821.94
Stack201-300.tif	4	236	1822.18
Stack201-300.tif	4	237	1821.22
Stack201-300.tif	4	238	1820.38
Stack201-300.tif	4	239	1820.75
Stack201-300.tif	4	240	1824.7
Stack201-300.tif	4	241	1822.8
Stack201-300.tif	4	242	1812.89
Stack201-300.tif	4	243	1813.71
Stack201-300.tif	4	244	1818.05
Stack201-300.tif	4	245	1831.8
Stack201-300.tif	4	246	1826.67
Stack201-300.tif	4	247	1822.84
Stack201-300.tif	4	248	1828.17
Stack201-300.tif	4	249	1828.08
Stack201-300.tif	4	250	1827.66
Stack201-300.tif	4	251	1829.53
Stack201-300.tif	4	252	1822.52
Stack201-300.tif	4	253	1818.88
Stack201-300.tif	4	254	1826.97
Stack201-300.tif	4	255	1821.1
Stack201-300.tif	4	256	1808.87
Stack201-300.tif	4	257	1833.23
Stack201-300.tif	4	258	1832.29
Stack201-300.tif	4	259	1813.97
Stack201-300.tif	4	260	1814.4
Stack201-300.tif	4	261	1812.16
Stack201-300.tif	4	262	1818.62
Stack201-300.tif	4	263	1808.74
Stack201-300.tif	4	264	1828.49
Stack201-300.tif	4	265	1820.47
Stack201-300.tif	4	266	1820.76
Stack201-300.tif	4	267	1824.1
Stack201-300.tif	4	268	1806.04
Stack201-300.tif	4	269	1818.13
Stack201-300.tif	4	270	1814.76
Stack201-300.tif	4	271	1812.98
Stack201-300.tif	4	272	1815.85
Stack201-300.tif	4	273	1807.63
Stack201-300.tif	4	274	1801.15
Stack201-300.tif	4	275	1793.35
Stack201-300.tif	4	276	1803.49
Stack201-300.tif	4	277	1810.33
Stack201-300.tif	4	278	1803.15
Stack201-300.tif	4	279	1800.51
Stack201-300.tif	4	280	1800.03
Stack201-300.tif	4	281	1802.84
Stack201-300.tif	4	282	1795.09
Stack201-300.tif	4	283	1804.67
Stack201-300.tif	4	284	1784.41
Stack201-300.tif	4	285	1799.47
Stack201-300.tif	4	286	1802.85
Stack201-300.tif	4	287	1806.17
Stack201-300.tif	4	288	1786.67
Stack201-300.tif	4	289	1794.89
Stack201-300.tif	4	290	1788.35
Stack201-300.tif	4	291	1797.15
Stack201-300.tif	4	292	1796.41
Stack201-300.tif	4	293	1804.76
Stack201-300.tif	4	294	1795.42
Stack201-300.tif	4	295	1792.9
Stack201-300.tif	4	296	1793.17
Stack201-300.tif	4	297	1796.44
Stack201-300.tif	4	298	1786.5
Stack201-300.tif	4	299	1775.67
Stack201-300.tif	4	300	1775.34
Stack301-389.tif	4	301	1797.18
Stack301-389.tif	4	302	1774.36
Stack301-389.tif	4	303	1788.27
Stack301-389.tif	4	304	1794.09
Stack301-389.tif	4	305	1780.14
Stack301-389.tif	4	306	1786.42
Stack301-389.tif	4	307	1779.08
Stack301-389.tif	4	308	1775.08
Stack301-389.tif	4	309	1789.49
Stack301-389.tif	4	310	1784.09
Stack301-389.tif	4	311	1787.89
Stack301-389.tif	4	312	1777.39
Stack301-389.tif	4	313	1776.81
Stack301-389.tif	4	314	1769.87
Stack301-389.tif	4	315	1764.53
Stack301-389.tif	4	316	1766.11
Stack301-389.tif	4	317	1771.06
Stack301-389.tif	4	318	1773.71
Stack301-389.tif	4	319	1763.14
Stack301-389.tif	4	320	1766.81
Stack301-389.tif	4	321	1769.25
Stack301-389.tif	4	322	1767.32
Stack301-389.tif	4	323	1762.82
Stack301-389.tif	4	324	1776.39
Stack301-389.tif	4	325	1757.83
Stack301-389.tif	4	326	1762.79
Stack301-389.tif	4	327	1743.26
Stack301-389.tif	4	328	1746.98
Stack301-389.tif	4	329	1758.89
Stack301-389.tif	4	330	1755.13
Stack301-389.tif	4	331	1759.44
Stack301-389.tif	4	332	1755.49
Stack301-389.tif	4	333	1757.81
Stack301-389.tif	4	334	1760.93
Stack301-389.tif	4	335	1751.02
Stack301-389.tif	4	336	1765.6
Stack301-389.tif	4	337	1746.44
Stack301-389.tif	4	338	1750.33
Stack301-389.tif	4	339	1749.77
Stack301-389.tif	4	340	1739.09
Stack301-389.tif	4	341	1755
Stack301-389.tif	4	342	1751.5
Stack301-389.tif	4	343	1748.63
Stack301-389.tif	4	344	1738.51
Stack301-389.tif	4	345	1737.82
Stack301-389.tif	4	346	1754.79
Stack301-389.tif	4	347	1746.49
Stack301-389.tif	4	348	1745.95
Stack301-389.tif	4	349	1746.97
Stack301-389.tif	4	350	1745.17
Stack301-389.tif	4	351	1738.82
Stack301-389.tif	4	352	1740.03
Stack301-389.tif	4	353	1729.99
Stack301-389.tif	4	354	1741.08
Stack301-389.tif	4	355	1736.06
Stack301-389.tif	4	356	1742.39
Stack301-389.tif	4	357	1728.2
Stack301-389.tif	4	358	1729.55
Stack301-389.tif	4	359	1736.17
Stack301-389.tif	4	360	1742.96
Stack301-389.tif	4	361	1728.51
Stack301-389.tif	4	362	1730
Stack301-389.tif	4	363	1728.34
Stack301-389.tif	4	364	1719.66
Stack301-389.tif	4	365	1734.86
Stack301-389.tif	4	366	1726.71
Stack301-389.tif	4	367	1725.34
Stack301-389.tif	4	368	1726.33
Stack301-389.tif	4	369	1721.52
Stack301-389.tif	4	370	1728.66
Stack301-389.tif	4	371	1737.64
Stack301-389.tif	4	372	1742.73
Stack301-389.tif	4	373	1726.57
Stack301-389.tif	4	374	1733.12
Stack301-389.tif	4	375	1725.46
Stack301-389.tif	4	376	1723.19
Stack301-389.tif	4	377	1723.17
Stack301-389.tif	4	378	1723.07
Stack301-389.tif	4	379	1719.93
Stack301-389.tif	4	380	1716.8
Stack301-389.tif	4	381	1711.04
Stack301-389.tif	4	382	1716.04
Stack301-389.tif	4	383	1720.11
Stack301-389.tif	4	384	1716.36
Stack301-389.tif	4	385	1720.61
Stack301-389.tif	4	386	1714.36
Stack301-389.tif	4	387	1716.42
Stack301-389.tif	4	388	1709.29
Stack301-389.tif	4	389	1707.36
Stack1-100.tif	5	1	2622.76
Stack1-100.tif	5	2	2614.54
Stack1-100.tif	5	3	2618.6
Stack1-100.tif	5	4	2618.19
Stack1-100.tif	5	5	2609.31
Stack1-100.tif	5	6	2630.52
Stack1-100.tif	5	7	2616.86
Stack1-100.tif	5	8	2613.96
Stack1-100.tif	5	9	2603.73
Stack1-100.tif	5	10	2615.9
Stack1-100.tif	5	11	2607.8
Stack1-100.tif	5	12	2632.99
Stack1-100.tif	5	13	2621.41
Stack1-100.tif	5	14	2626.03
Stack1-100.tif	5	15	2624.89
Stack1-100.tif	5	16	2769.73
Stack1-100.tif	5	17	398.985
Stack1-100.tif	5	18	1592.45
Stack1-100.tif	5	19	2685.51
Stack1-100.tif	5	20	2671.04
Stack1-100.tif	5	21	2639.92
Stack1-100.tif	5	22	2668.68
Stack1-100.tif	5	23	2673.46
Stack1-100.tif	5	24	2642.07
Stack1-100.tif	5	25	2577.83
Stack1-100.tif	5	26	2638.71
Stack1-100.tif	5	27	2641.16
Stack1-100.tif	5	28	621.013
Stack1-100.tif	5	29	2069.8
Stack1-100.tif	5	30	2012.6
Stack1-100.tif	5	31	2805.62
Stack1-100.tif	5	32	2915.57
Stack1-100.tif	5	33	2608.05
Stack1-100.tif	5	34	2659.11
Stack1-100.tif	5	35	2657.79
Stack1-100.tif	5	36	2661.6
Stack1-100.tif	5	37	2303.71
Stack1-100.tif	5	38	2953.27
Stack1-100.tif	5	39	12.9841
Stack1-100.tif	5	40	2650.22
Stack1-100.tif	5	41	2655.1
Stack1-100.tif	5	42	2641.54
Stack1-100.tif	5	43	2661.62
Stack1-100.tif	5	44	3323.81
Stack1-100.tif	5	45	4024.71
Stack1-100.tif	5	46	1042.19
Stack1-100.tif	5	47	3376.71
Stack1-100.tif	5	48	3205.11
Stack1-100.tif	5	49	3100.36
Stack1-100.tif	5	50	3157.66
Stack1-100.tif	5	51	3187.17
Stack1-100.tif	5	52	3186.15
Stack1-100.tif	5	53	3170.01
Stack1-100.tif	5	54	3181.86
Stack1-100.tif	5	55	3169.56
Stack1-100.tif	5	56	3182.92
Stack1-100.tif	5	57	3172.2
Stack1-100.tif	5	58	3171.71
Stack1-100.tif	5	59	3184.27
Stack1-100.tif	5	60	3178.69
Stack1-100.tif	5	61	3132.23
Stack1-100.tif	5	62	3317.41
Stack1-100.tif	5	63	3249.81
Stack1-100.tif	5	64	-137.344
Stack1-100.tif	5	65	402.557
Stack1-100.tif	5	66	2646.32
Stack1-100.tif	5	67	2668.4
Stack1-100.tif	5	68	2376.4
Stack1-100.tif	5	69	2660.93
Stack1-100.tif	5	70	2976.75
Stack1-100.tif	5	71	4281.08
Stack1-100.tif	5	72	4086.26
Stack1-100.tif	5	73	4771.96
Stack1-100.tif	5	74	5110.98
Stack1-100.tif	5	75	2648.44
Stack1-100.tif	5	76	2686.29
Stack1-100.tif	5	77	2529.65
Stack1-100.tif	5	78	2681.73
Stack1-100.tif	5	79	2712.44
Stack1-100.tif	5	80	2682.78
Stack1-100.tif	5	81	2693.46
Stack1-100.tif	5	82	2712.25
Stack1-100.tif	5	83	2719.95
Stack1-100.tif	5	84	2745.14
Stack1-100.tif	5	85	2768.83
Stack1-100.tif	5	86	2768.37
Stack1-100.tif	5	87	3752.82
Stack1-100.tif	5	88	2792.94
Stack1-100.tif	5	89	2810.39
Stack1-100.tif	5	90	2826.41
Stack1-100.tif	5	91	2846.52
Stack1-100.tif	5	92	2846.67
Stack1-100.tif	5	93	2857.24
Stack1-100.tif	5	94	2828.25
Stack1-100.tif	5	95	3017.42
Stack1-100.tif	5	96	2908.69
Stack1-100.tif	5	97	2929.48
Stack1-100.tif	5	98	2931.24
Stack1-100.tif	5	99	2946.89
Stack1-100.tif	5	100	2938.82
Stack101-200.tif	5	101	2987.32
Stack101-200.tif	5	102	2981.14
Stack101-200.tif	5	103	3014.19
Stack101-200.tif	5	104	2998.9
Stack101-200.tif	5	105	2973.84
Stack101-200.tif	5	106	2985.79
Stack101-200.tif	5	107	2995.42
Stack101-200.tif	5	108	2994.98
Stack101-200.tif	5	109	3014.8
Stack101-200.tif	5	110	2582.7
Stack101-200.tif	5	111	3011.82
Stack101-200.tif	5	112	3018.56
Stack101-200.tif	5	113	3023.87
Stack101-200.tif	5	114	3028.99
Stack101-200.tif	5	115	3044.89
Stack101-200.tif	5	116	3087.9
Stack101-200.tif	5	117	3046.2
Stack101-200.tif	5	118	3042.12
Stack101-200.tif	5	119	3051.61
Stack101-200.tif	5	120	3054.25
Stack101-200.tif	5	121	3052.09
Stack101-200.tif	5	122	3062.48
Stack101-200.tif	5	123	3068.3
Stack101-200.tif	5	124	3064.14
Stack101-200.tif	5	125	3079.14
Stack101-200.tif	5	126	3060.91
Stack101-200.tif	5	127	3069.13
Stack101-200.tif	5	128	3060.88
Stack101-200.tif	5	129	3060.66
Stack101-200.tif	5	130	3074.91
Stack101-200.tif	5	131	3057.87
Stack101-200.tif	5	132	3077.14
Stack101-200.tif	5	133	3071.29
Stack101-200.tif	5	134	3076.95
Stack101-200.tif	5	135	3078.2
Stack101-200.tif	5	136	3067.3
Stack101-200.tif	5	137	3076.51
Stack101-200.tif	5	138	3071.08
Stack101-200.tif	5	139	3079.62
Stack101-200.tif	5	140	3081.82
Stack101-200.tif	5	141	3082.89
Stack101-200.tif	5	142	3078.24
Stack101-200.tif	5	143	3077.24
Stack101-200.tif	5	144	3082.49
Stack101-200.tif	5	145	3078.52
Stack101-200.tif	5	146	3075.7
Stack101-200.tif	5	147	3073.01
Stack101-200.tif	5	148	3070.38
Stack101-200.tif	5	149	3059.9
Stack101-200.tif	5	150	3053.18
Stack101-200.tif	5	151	3063.63
Stack101-200.tif	5	152	3066.27
Stack101-200.tif	5	153	3060.38
Stack101-200.tif	5	154	3060.81
Stack101-200.tif	5	155	3054.91
Stack101-200.tif	5	156	3065.71
Stack101-200.tif	5	157	3051.68
Stack101-200.tif	5	158	3051.85
Stack101-200.tif	5	159	3056.17
Stack101-200.tif	5	160	3058.2
Stack101-200.tif	5	161	3049.81
Stack101-200.tif	5	162	3050.16
Stack101-200.tif	5	163	3052.9
Stack101-200.tif	5	164	3059.45
Stack101-200.tif	5	165	3027.92
Stack101-200.tif	5	166	3034.1
Stack101-200.tif	5	167	3054.52
Stack101-200.tif	5	168	3030.42
Stack101-200.tif	5	169	3036.37
Stack101-200.tif	5	170	3047.17
Stack101-200.tif	5	171	3047.94
Stack101-200.tif	5	172	3043.29
Stack101-200.tif	5	173	3032.45
Stack101-200.tif	5	174	3030.19
Stack101-200.tif	5	175	3030.56
Stack101-200.tif	5	176	3026.84
Stack101-200.tif	5	177	3028.03
Stack101-200.tif	5	178	3023.22
Stack101-200.tif	5	179	3022
Stack101-200.tif	5	180	3020.25
Stack101-200.tif	5	181	3003.93
Stack101-200.tif	5	182	3019.24
Stack101-200.tif	5	183	3019.42
Stack101-200.tif	5	184	3008.86
Stack101-200.tif	5	185	3009.75
Stack101-200.tif	5	186	2998.22
Stack101-200.tif	5	187	3014.17
Stack101-200.tif	5	188	3014.73
Stack101-200.tif	5	189	3013.74
Stack101-200.tif	5	190	2994.22
Stack101-200.tif	5	191	3000.17
Stack101-200.tif	5	192	2985.91
Stack101-200.tif	5	193	3005.03
Stack101-200.tif	5	194	3001.83
Stack101-200.tif	5	195	2987.17
Stack101-200.tif	5	196	2990.82
Stack101-200.tif	5	197	2985.99
Stack101-200.tif	5	198	2978.34
Stack101-200.tif	5	199	2988.27
Stack101-200.tif	5	200	2994.12
Stack201-300.tif	5	201	2992.24
Stack201-300.tif	5	202	2968.2
Stack201-300.tif	5	203	2982.05
Stack201-300.tif	5	204	2976.27
Stack201-300.tif	5	205	2977.04
Stack201-300.tif	5	206	2970.05
Stack201-300.tif	5	207	2972.98
Stack201-300.tif	5	208	2971.17
Stack201-300.tif	5	209	2984.97
Stack201-300.tif	5	210	2970.02
Stack201-300.tif	5	211	2978.64
Stack201-300.tif	5	212	2981.23
Stack201-300.tif	5	213	2970.7
Stack201-300.tif	5	214	2963.55
Stack201-300.tif	5	215	2958.82
Stack201-300.tif	5	216	2963.99
Stack201-300.tif	5	217	2958.67
Stack201-300.tif	5	218	2955.14
Stack201-300.tif	5	219	2957.23
Stack201-300.tif	5	220	2956.29
Stack201-300.tif	5	221	2947.9
Stack201-300.tif	5	222	2950.04
Stack201-300.tif	5	223	2956.56
Stack201-300.tif	5	224	2948.68
Stack201-300.tif	5	225	2956.09
Stack201-300.tif	5	226	2942.7
Stack201-300.tif	5	227	2957.25
Stack201-300.tif	5	228	2943.06
Stack201-300.tif	5	229	2935.36
Stack201-300.tif	5	230	2943.09
Stack201-300.tif	5	231	2938.49
Stack201-300.tif	5	232	2939.51
Stack201-300.tif	5	233	2945.17
Stack201-300.tif	5	234	2929.32
Stack201-300.tif	5	235	2931.9
Stack201-300.tif	5	236	2928.66
Stack201-300.tif	5	237	2933.15
Stack201-300.tif	5	238	2926.54
Stack201-300.tif	5	239	2924.41
Stack201-300.tif	5	240	2927.49
Stack201-300.tif	5	241	2930.59
Stack201-300.tif	5	242	2929.47
Stack201-300.tif	5	243	2923.59
Stack201-300.tif	5	244	2927.55
Stack201-300.tif	5	245	2922.66
Stack201-300.tif	5	246	2935.53
Stack201-300.tif	5	247	2906.93
Stack201-300.tif	5	248	2914.55
Stack201-300.tif	5	249	2920.11
Stack201-300.tif	5	250	2893.73
Stack201-300.tif	5	251	2903.59
Stack201-300.tif	5	252	2901.97
Stack201-300.tif	5	253	2907.69
Stack201-300.tif	5	254	2902.98
Stack201-300.tif	5	255	2891.32
Stack201-300.tif	5	256	2896.44
Stack201-300.tif	5	257	2898.79
Stack201-300.tif	5	258	2890.46
Stack201-300.tif	5	259	2882.71
Stack201-300.tif	5	260	2890.99
Stack201-300.tif	5	261	2888.9
Stack201-300.tif	5	262	2882.05
Stack201-300.tif	5	263	2877.72
Stack201-300.tif	5	264	2873.43
Stack201-300.tif	5	265	2867
Stack201-300.tif	5	266	2873.71
Stack201-300.tif	5	267	2864.79
Stack201-300.tif	5	268	2876.72
Stack201-300.tif	5	269	2863.48
Stack201-300.tif	5	270	2858.11
Stack201-300.tif	5	271	2856.59
Stack201-300.tif	5	272	2857.87
Stack201-300.tif	5	273	2854.06
Stack201-300.tif	5	274	2863.75
Stack201-300.tif	5	275	2855.36
Stack201-300.tif	5	276	2850.94
Stack201-300.tif	5	277	2840.05
Stack201-300.tif	5	278	2829.88
Stack201-300.tif	5	279	2846.92
Stack201-300.tif	5	280	2841.87
Stack201-300.tif	5	281	2834.23
Stack201-300.tif	5	282	2820.3
Stack201-300.tif	5	283	2831.63
Stack201-300.tif	5	284	2829.11
Stack201-300.tif	5	285	2828.19
Stack201-300.tif	5	286	2815.86
Stack201-300.tif	5	287	2817.04
Stack201-300.tif	5	288	2813.7
Stack201-300.tif	5	289	2807.47
Stack201-300.tif	5	290	2808.28
Stack201-300.tif	5	291	2788.74
Stack201-300.tif	5	292	2795.9
Stack201-300.tif	5	293	2805.56
Stack201-300.tif	5	294	2792.45
Stack201-300.tif	5	295	2793.12
Stack201-300.tif	5	296	2790.92
Stack201-300.tif	5	297	2787.51
Stack201-300.tif	5	298	2789.08
Stack201-300.tif	5	299	2769.77
Stack201-300.tif	5	300	2774.05
Stack301-389.tif	5	301	2765.18
Stack301-389.tif	5	302	2768.54
Stack301-389.tif	5	303	2758.37
Stack301-389.tif	5	304	2762.06
Stack301-389.tif	5	305	2762.86
Stack301-389.tif	5	306	2773.18
Stack301-389.tif	5	307	2753.69
Stack301-389.tif	5	308	2744.86
Stack301-389.tif	5	309	2754.16
Stack301-389.tif	5	310	2749.17
Stack301-389.tif	5	311	2742.78
Stack301-389.tif	5	312	2739.71
Stack301-389.tif	5	313	2745.96
Stack301-389.tif	5	314	2737.32
Stack301-389.tif	5	315	2737.12
Stack301-389.tif	5	316	2735.56
Stack301-389.tif	5	317	2730.66
Stack301-389.tif	5	318	2736.09
Stack301-389.tif	5	319	2727.89
Stack301-389.tif	5	320	2731.18
Stack301-389.tif	5	321	2716.81
Stack301-389.tif	5	322	2720.22
Stack301-389.tif	5	323	2703.51
Stack301-389.tif	5	324	2709.98
Stack301-389.tif	5	325	2708.59
Stack301-389.tif	5	326	2716.03
Stack301-389.tif	5	327	2701.22
Stack301-389.tif	5	328	2705.99
Stack301-389.tif	5	329	2713.37
Stack301-389.tif	5	330	2705.37
Stack301-389.tif	5	331	2702.77
Stack301-389.tif	5	332	2699.51
Stack301-389.tif	5	333	2703.43
Stack301-389.tif	5	334	2701.14
Stack301-389.tif	5	335	2703.39
Stack301-389.tif	5	336	2696.14
Stack301-389.tif	5	337	2690.31
Stack301-389.tif	5	338	2698.25
Stack301-389.tif	5	339	2684.79
Stack301-389.tif	5	340	2682.07
Stack301-389.tif	5	341	2686.22
Stack301-389.tif	5	342	2685.28
Stack301-389.tif	5	343	2679.85
Stack301-389.tif	5	344	2687.51
Stack301-389.tif	5	345	2677.72
Stack301-389.tif	5	346	2659.96
Stack301-389.tif	5	347	2670.77
Stack301-389.tif	5	348	2662.91
Stack301-389.tif	5	349	2677.75
Stack301-389.tif	5	350	2662.28
Stack301-389.tif	5	351	2677.01
Stack301-389.tif	5	352	2661.69
Stack301-389.tif	5	353	2665.85
Stack301-389.tif	5	354	2668.96
Stack301-389.tif	5	355	2658.73
Stack301-389.tif	5	356	2668.59
Stack301-389.tif	5	357	2654.31
Stack301-389.tif	5	358	2649.49
Stack301-389.tif	5	359	2646.96
Stack301-389.tif	5	360	2653.01
Stack301-389.tif	5	361	2633.14
Stack301-389.tif	5	362	2649.22
Stack301-389.tif	5	363	2645.13
Stack301-389.tif	5	364	2664.01
Stack301-389.tif	5	365	2642.67
Stack301-389.tif	5	366	2647.24
Stack301-389.tif	5	367	2653.93
Stack301-389.tif	5	368	2653.69
Stack301-389.tif	5	369	2637.25
Stack301-389.tif	5	370	2643.83
Stack301-389.tif	5	371	2644.14
Stack301-389.tif	5	372	2639.03
Stack301-389.tif	5	373	2632.77
Stack301-389.tif	5	374	2639.42
Stack301-389.tif	5	375	2642.2
Stack301-389.tif	5	376	2640.67
Stack301-389.tif	5	377	2637.77
Stack301-389.tif	5	378	2642.41
Stack301-389.tif	5	379	2634.8
Stack301-389.tif	5	380	2626.36
Stack301-389.tif	5	381	2621.93
Stack301-389.tif	5	382	2629.62
Stack301-389.tif	5	383	2632.3
Stack301-389.tif	5	384	2629.69
Stack301-389.tif	5	385	2632.48
Stack301-389.tif	5	386	2636.6
Stack301-389.tif	5	387	2614.44
Stack301-389.tif	5	388	2616.62
Stack301-389.tif	5	389	2624.41
Stack1-100.tif	6	1	1597.6
Stack1-100.tif	6	2	1593.76
Stack1-100.tif	6	3	1603.51
Stack1-100.tif	6	4	1614.18
Stack1-100.tif	6	5	1600.63
Stack1-100.tif	6	6	1606.41
Stack1-100.tif	6	7	1605.44
Stack1-100.tif	6	8	1604.66
Stack1-100.tif	6	9	1591.27
Stack1-100.tif	6	10	1597.83
Stack1-100.tif	6	11	1601.45
Stack1-100.tif	6	12	1605.78
Stack1-100.tif	6	13	1595.05
Stack1-100.tif	6	14	1599.64
Stack1-100.tif	6	15	1593.1
Stack1-100.tif	6	16	1730.38
Stack1-100.tif	6	17	126.576
Stack1-100.tif	6	18	485.285
Stack1-100.tif	6	19	1647.34
Stack1-100.tif	6	20	1856.92
Stack1-100.tif	6	21	1623.11
Stack1-100.tif	6	22	1624.11
Stack1-100.tif	6	23	1622.69
Stack1-100.tif	6	24	1579.96
Stack1-100.tif	6	25	1536.71
Stack1-100.tif	6	26	1577.17
Stack1-100.tif	6	27	1571.92
Stack1-100.tif	6	28	336.463
Stack1-100.tif	6	29	1198.45
Stack1-100.tif	6	30	2051.88
Stack1-100.tif	6	31	1618.73
Stack1-100.tif	6	32	1628.56
Stack1-100.tif	6	33	1570.64
Stack1-100.tif	6	34	1606.77
Stack1-100.tif	6	35	1743.81
Stack1-100.tif	6	36	1620.44
Stack1-100.tif	6	37	1238.81
Stack1-100.tif	6	38	1607.52
Stack1-100.tif	6	39	-40.4933
Stack1-100.tif	6	40	1641.38
Stack1-100.tif	6	41	1617.53
Stack1-100.tif	6	42	1631.23
Stack1-100.tif	6	43	1623
Stack1-100.tif	6	44	1525.31
Stack1-100.tif	6	45	1628.21
Stack1-100.tif	6	46	430.943
Stack1-100.tif	6	47	1532.16
Stack1-100.tif	6	48	1624.15
Stack1-100.tif	6	49	1613.84
Stack1-100.tif	6	50	1626.61
Stack1-100.tif	6	51	1627.61
Stack1-100.tif	6	52	1620
Stack1-100.tif	6	53	1618.88
Stack1-100.tif	6	54	1631.58
[truncated: 3,058 more rows]

## Sheet: Sheet2
	1	2	3	4	5	6	7	8	9	10	11	12	13																													cell11	t		cell11	t
1	2065.61	2335.62	1707.13	1568.1	2622.76	1597.6	2421.52	1626.16	2190.28	1617.3	1630.93	3344.69	2211.54																													100	0		100	0
2	2058.97	2349.25	1708.9	1581.39	2614.54	1593.76	2400.65	1629.16	2192.51	1616.19	1629.98	3336.45	2203.75																													99.9417	0.1		99.9417	0.1
3	2065.73	2332.61	1695.56	1568.57	2618.6	1603.51	2416.52	1641.7	2197.07	1599.51	1642.55	3336.57	2202.31																													100.712	0.2		100.712	0.2
4	2064.94	2344.62	1687.48	1569.98	2618.19	1614.18	2427.36	1624.56	2204.95	1602.48	1634.52	3340.11	2210.16																													100.22	0.3		100.22	0.3
5	2061.76	2348.61	1700.38	1573.32	2609.31	1600.63	2400.18	1645.11	2195.41	1611.75	1625.46	3350.98	2201.86																													99.6644	0.4		99.6644	0.4
6	2069.88	2328.92	1714.88	1578.24	2630.52	1606.41	2427.87	1643.42	2173.02	1612.94	1638.22	3333.62	2219.28																													100.447	0.5		100.447	0.5
7	2061.73	2342.04	1705.99	1562.25	2616.86	1605.44	2406.94	1634.38	2185.61	1628.32	1629.02	3347.3	2217.93																													99.8825	0.6		99.8825	0.6
8	2075.84	2334.08	1717.2	1572.6	2613.96	1604.66	2410.08	1641.94	2187.39	1621.78	1638.97	3342.53	2208.59																													100.493	0.7		100.493	0.7
9	2059.38	2338.65	1702.03	1569.8	2603.73	1591.27	2417.21	1628.37	2179.97	1618.02	1642.72	3345.04	2196.69																													100.723	0.8		100.723	0.8
10	2069.05	2334.43	1694.07	1573.52	2615.9	1597.83	2417.95	1637.49	2188.23	1623.9	1634.65	3344.77	2192.05																													100.228	0.9		100.228	0.9
11	2064.42	2332.14	1705.18	1573.01	2607.8	1601.45	2419.71	1630.03	2202.19	1622.5	1632.96	3345.68	2211.67																													100.124	1		100.124	1
12	2070.56	2338.96	1697.55	1573.99	2632.99	1605.78	2419.71	1631.1	2192.36	1609.8	1639.58	3353.45	2210.37																													100.53	1.1		100.53	1.1
13	2071.67	2324.48	1693.66	1566.28	2621.41	1595.05	2433.76	1627.83	2201.94	1616.74	1640.67	3348.19	2210.12																													100.597	1.2		100.597	1.2
14	2069.8	2328.95	1700.73	1570.68	2626.03	1599.64	2426.6	1642.92	2184.45	1618.94	1637.68	3353.65	2223.99																													100.414	1.3		100.414	1.3
15	2075.62	2332.52	1704.67	1583.29	2624.89	1593.1	2430.33	1628.59	2197.54	1623.16	1634.28	3349.26	2217.4																													100.206	1.4		100.206	1.4
16		2367.45									1624.92																															99.6316	1.5		99.6316	1.5
17																																										0	1.6		103.117	1.8
18																																										0	1.7		102.245	1.9
19		2387.76						1630.73			1681.77																															103.117	1.8		102.421	2
20	2119.87		1731.47					1634.85		1644.22	1667.54	3394.64																														102.245	1.9		99.1424	2.1
21	2109.18		1750.12		2639.92	1623.11			2187.03	1642.13	1670.42	3369.24																														102.421	2		101.581	2.2
22	2116.61	2358.56	1743.71	1610		1624.11	2470.38	1657.35			1616.95	3428.99	2232.43																													99.1424	2.1		102.01	2.3
23	2111.78		1682.44	1601.06		1622.69	2442.31	1668.18		1639.77	1656.72	3421.61	2225.43																													101.581	2.2		102.381	2.5
24		2313.53	1727.76	1611.05	2642.07				2211.23	1652.22	1663.71	3404.43	2238.68																													102.01	2.3		101.656	2.6
25	2106.18			1601.94																																						0	2.4		100.196	2.9
26			1732.31		2638.71				2215.02		1669.76	3390.76																														102.381	2.5		102.245	3
27	2142.83	2341.77	1734.57		2641.16		2445.39	1649.84	2204.41		1657.94		2219.7																													101.656	2.6		102.272	3.1
28																																										0	2.7		101.117	3.3
29							2458.54																																			0	2.8		100.806	3.4
30	2144.72	2386.72	1703.5					1670.51		1629.63	1634.13																															100.196	2.9		101.172	3.5
31	2133.62	2352.54	1717.68	1609.58		1618.73	2475.43	1659.27	2233.88	1647.24	1667.54	3411.68																														102.245	3		102.012	3.9
32		2291.17	1752.03			1628.56	2472.79	1649.59	2238.54	1645.65	1667.98	3399.27																														102.272	3.1		101.331	4
33									2181.59																																	0	3.2		100.026	4.1
34	2123.69		1746.47	1617.23	2659.11	1606.77	2476.92	1652.23	2240.33	1651.7	1649.15	3398.82																														101.117	3.3		101.94	4.2
35	2129.56		1740.02	1616.18	2657.79		2466.96	1644.8	2233.73	1638.55	1644.08	3408.35																														100.806	3.4		98.9182	4.3
36	2148.62		1730.17	1611.73	2661.6	1620.44		1653.28	2234.36	1654.21	1650.04	3398.31																														101.172	3.5		101.362	4.4
37	2168.69																																									0	3.6		101.046	4.6
38	2130.73					1607.52	2475.75		2222.03																																	0	3.7		102.035	4.7
39																																										0	3.8		101.625	4.8
40	2146		1758.16	1607.25	2650.22	1641.38	2472.03		2239.97		1663.75																															102.012	3.9		101.817	5.1
41	2118.71		1756.02	1614.07	2655.1	1617.53	2455.81		2252.41	1632.74	1652.64		2259.19																													101.331	4		101.117	5.2
42	2114.36		1746.14	1614.6	2641.54	1631.23	2474.38		2233.95	1638.05	1631.36		2252.54																													100.026	4.1		102.321	5.3
43	2116.94		1747.71	1614.62	2661.62	1623	2463.2		2245.96	1637.82	1662.56		2261.55																													101.94	4.2		101.687	5.4
44			1722.38	1620.31					2183.04		1613.29																															98.9182	4.3		102.348	5.5
45	2113.93	2291.13	1752.61	1626.76		1628.21	2469.43		2235.88	1638.33	1653.15																															101.362	4.4		101.304	5.6
46																																										0	4.5		101.523	5.7
47	2128.32	2400.95	1701.27	1604.04			2466.78		2214.73		1647.99																															101.046	4.6		102.18	5.8
48	2114.78	2349.76	1746.02	1621.14		1624.15	2467.91		2237.32	1645.12	1664.13																															102.035	4.7		101.613	5.9
49	2120.53	2363.74	1743.27	1617.61		1613.84	2477.55	1685.01	2237.61	1644.34	1657.44																															101.625	4.8		100.47	6
50	2136.21	2366.1	1731.33	1603.17		1626.61	2469.52	1653.83	2233.48	1641.05																																0	4.9		101.118	6.1
51	2122.32	2376.93	1754.2	1620.82		1627.61	2470.79	1652.34	2242.04	1639.79																																0	5		102.719	6.2
52	2113.94	2366.72	1731.56	1608.43		1620	2468.17	1645.44	2237.14	1652.02	1660.57																															101.817	5.1		102.537	6.5
53	2116.45	2377.56	1732.01	1613.52		1618.88	2473.72	1640.59	2244.76	1645.11	1649.16																															101.117	5.2		100.817	6.6
54	2126.5	2376.85	1729.86	1618.59		1631.58	2479.28	1663.89	2240.16	1650.08	1668.79																															102.321	5.3		100.28	6.7
55	2116.46	2360.29	1720.25	1631.34		1632.11	2471.57	1655.61	2247.81	1646.51	1658.45																															101.687	5.4		101.378	7.1
56	2113.03	2376.67	1730.78	1626.22		1629.83	2484.37	1650.69	2246.64	1647.22	1669.23																															102.348	5.5		101.407	7.8
57	2111.5	2366.92	1743.67	1610.74		1624.09	2473.43	1656.54	2238.15	1647.94	1652.19																															101.304	5.6		102.097	8
58	2116.22	2368.74	1739.77	1621.04		1612.6	2463.57	1651.35	2237.34	1647.1	1655.77																															101.523	5.7		101.928	8.2
59	2127.62	2360.15	1749.36	1610.77		1622.63	2472.37	1652.54	2242.24	1647.49	1666.49																															102.18	5.8		102.267	8.3
60	2121.79	2371.64	1739.01	1621.87		1624.25	2468.66	1661.34	2235.72	1651.56	1657.23																															101.613	5.9		102.385	8.4
61		2359.45	1738.88			1642.8			2240.26	1636.38	1638.59																															100.47	6		103.783	8.5
62	2105.44	2459.54	1738.74	1618.11		1632.43	2479.62	1655.1	2226.41	1647.67	1649.17																															101.118	6.1		104.62	8.6
63	2154.7		1760.05	1615.2		1630.86	2501.92	1653.38	2275.95	1663.76	1675.28																															102.719	6.2		105.017	8.7
64																																										0	6.3		105.875	8.8
65																																										0	6.4		106.034	8.9
66		2457.09			2646.32						1672.32	3359.41																														102.537	6.5		106.937	9.1
67	2078.44	2447.06	1754.53		2668.4		2472.5			1646.5	1644.25	3358.99	2186.66																													100.817	6.6		107.772	9.2
68	2069.28		1735.09					1638.38		1629.43	1635.49	3423.51	2257.93																													100.28	6.7		107.794	9.3
69	2128.92	2349.52			2660.93	1618.45				1667.72		3412.96																														0	6.8		108.305	9.4
70	2115.3	2303.31	1754.33	1628.74		1659.55		1620.99				3435.33	2219.53																													0	6.9		109.185	9.5
71				1619.79																																						0	7		109.798	9.6
72	2100.16			1609.4					2282.37		1653.4																															101.378	7.1		109.519	9.7
73	2102.6	2379.26		1631.73			2546.22					3360.01	2245.68																													0	7.2		110.449	9.8
74								1673.95	2253.99																																	0	7.3		110.115	9.9
75					2648.44		2527.04																																			0	7.4		111.027	10
76	2114.14				2686.29																																					0	7.5		111.265	10.1
77	2089.61		1749.4					1654.01	2263.54			3359.45	2176.33																													0	7.6		110.879	10.2
78					2681.73				2285.78	1655.88		3328.11																														0	7.7		111.062	10.3
79	2159.26			1642.98	2712.44		2482.6		2322.44		1653.87																															101.407	7.8		111.796	10.4
80	2068.67		1759.94	1639.96	2682.78		2544.54			1693.39																																0	7.9		112.374	10.5
81		2337.99	1759.37		2693.46		2528.71	1656.86	2278.3	1667	1665.13		2217.57																													102.097	8		113.128	10.6
82		2303.58	1745.16		2712.25	1648.85	2576.89	1777.78	2270.31	1701.28			2216.06																													0	8.1		113.07	10.8
83	2085.52	2355.83	1755.72	1632.93	2719.95	1659.83	2512.57	1628.65	2300.1	1687.77	1662.38		2224.47																													101.928	8.2		113.139	10.9
84	2077.44	2349.07	1776.99	1643.53	2745.14	1678.88	2536.58	1670	2300.31	1710.5	1667.91	3445.69	2237.88																													102.267	8.3		113.978	11.1
85	2058.21		1774.39		2768.83	1678.87	2530.68	1693.99	2379.88	1715.38	1669.83	3474.91	2291.37																													102.385	8.4		114.655	11.2
86	2093.96	2394.31	1797.09	1684.68	2768.37	1685.4	2545.57	1678.73	2331.89	1729.74	1692.63	3499.61																														103.783	8.5		114.831	11.3
87	2210.72	2402.6	1807.39	1691.12		1696.49	2496.29	1703.63	2333.14	1752.31	1706.28	3522.79	2315.01																													104.62	8.6		114.659	11.4
88		2425.84	1782.74	1688.76	2792.94	1707.99	2594.35	1718.71	2355.44	1757.64	1712.75	3559.31	2337.04																													105.017	8.7		114.711	11.5
89		2433.94		1699.13	2810.39	1716.14	2606.83	1728.97	2365.28		1726.75	3611.83	2335.65																													105.875	8.8		115.006	11.6
90	2151.23	2461.26	1834.38		2826.41	1714.56	2622.96		2410.73	1761.35	1729.35	3614.74	2359.98																													106.034	8.9		115.844	11.7
91	2200.94	2477.66	1852.86	1729.12	2846.52	1752.41	2658.88	1917.88	2409.8	1798.16		3625.91	2188.17																													0	9		116.08	11.8
92	2182.86		1848.61	1693.4	2846.67	1749.58	2647.4	1929.97	2403.44	1783.57	1744.08	3632.51	2389.84																													106.937	9.1		114.923	11.9
93	2209.64		1860.57	1749.31	2857.24	1741.36	2645.12	1943.17	2421.64	1800.89	1757.69	3668.77	2430																													107.772	9.2		115.818	12
94	2219.75	2525.91	1866.68	1750.41	2828.25	1753.65	2671.35	1958.05		1806.17	1758.05	3684.66	2427.45																													107.794	9.3		115.946	12.1
95		2545.16	1885.77	1707.83				1968.68	2451.32	1807.55	1766.38	3689.71	2430.82																													108.305	9.4		116.386	12.2
96	2247.7	2544.93		1751.86	2908.69	1782.85	2708.09	1971.9		1821.62	1780.73	3719.01	2433.01																													109.185	9.5		115.938	12.3
97	2245.18	2563.92	1930.69	1775.01	2929.48		2716.31	1982.47	2448.29	1814.93	1790.73	3727.46	2456.69																													109.798	9.6		116.222	12.4
98	2247.18	2584.97	1920.15	1795.47	2931.24	1792.66	2719.7	1992.69	2488.4	1844.84	1786.18	3741.79	2464.34																													109.519	9.7		116.585	12.5
99	2276.34	2575.78	1913.39	1743.53	2946.89	1812.78	2739.37	1994.48	2484.33	1840.37	1801.36	3766.47	2477.57																													110.449	9.8		116.048	12.6
100	2261.21	2583.81	1922.97	1793.31	2938.82	1807.78	2748.89	1998.87	2500.55	1859.71	1795.89	3785.75	2488.78																													110.115	9.9		117.307	12.7
101	2294.7	2596.71	1921.25	1767.81	2987.32	1810.05	2744.6	2013.14	2511.55	1853.9	1810.77	3785.5	2433.51																													111.027	10		116.783	12.8
102	2289.29	2609.82	1925.7	1797.58	2981.14	1817.86	2762.29	2020.64	2510.91	1860.88	1814.66	3797.92	2509.26																													111.265	10.1		117.596	12.9
103	2317.93	2618.39	1952.39	1797.37	3014.19	1818.64	2759.5	2027.1	2515.64	1864.45	1808.36	3812.5																														110.879	10.2		117.279	13
104	2342.3	2625.48	1942.73	1805.08	2998.9		2702.26	2039.98	2525.85	1864.07	1811.35	3831.23	2491																													111.062	10.3		115.85	13.1
105	2273.6	2639.98	1956.16	1791.22	2973.84	1829.35	2782.95	2030.88	2518.59	1868.08	1823.31	3831.16	2522.38																													111.796	10.4		116.26	13.2
106	2332.76	2632.18	1950.29	1797.34	2985.79	1837.78	2794.07	2035.87	2538.56	1868.47	1832.74	3847.49	2525.84																													112.374	10.5		117.218	13.3
107	2330.92	2638.81	1958.03	1792.48	2995.42	1839.6	2791.99	2042.85	2539.73	1880.27	1845.04	3858.92	2544.84																													113.128	10.6		117.006	13.4
108	2356.38	2651.35	1971.26	1789.84	2994.98	1855.75	2798.53	2039.6	2541.96			3869	2544.27																													0	10.7		117.045	13.5
109	2356.59	2650.46	1951.74	1801.71	3014.8	1863.74	2816.27	2057.79	2517.83	1892.54	1844.1	3863.45	2534.05																													113.07	10.8		117.751	13.6
110	2334.96		1960.98	1755.97		1851.92	2799.88	2058.88	2557.68	1886.96	1845.22	3879.37	2545.1																													113.139	10.9		117.174	13.7
111	2360.55	2651.56	1967.66	1818.45	3011.82	1874.31	2835.86	2064.78	2554.83	1891.01		3885.72	2566.79																													0	11		117.072	13.8
112	2353.68	2649.16		1819.47	3018.56			2052.6	2544.6	1873.19	1858.9		2571.61																													113.978	11.1		117.53	13.9
113	2363.5		1975.16		3023.87	1863.96	2825.53	2076.15		1883.95	1869.94	3897.29	2587.97																													114.655	11.2		118.081	14
114	2368.57	2670.86	1977.01	1838.55	3028.99		2840.52	2068.79	2570.79		1872.81	3898.5	2569.27																													114.831	11.3		117.548	14.1
115	2382.87	2683.89	1984.19	1821.69	3044.89	1870.09	2836.28	2080.94		1895.92	1870.02	3935.85	2572.76																													114.659	11.4		118.857	14.2
116	2374.4		1976.73	1809.73		1865.88	2852.36	2068.49		1888.07	1870.86	3919.47	2591.67																													114.711	11.5		118.195	14.3
117	2391.94	2673.21	1995.79		3046.2		2847.31	2076.02	2571.91	1900.63	1875.68	3922.67																														115.006	11.6		118.153	14.4
118	2395.29	2688.56	1982.92	1806.29	3042.12	1875.01	2840.99	2077.76	2572.09	1896.79	1889.34	3941.41	2584.96																													115.844	11.7		118.097	14.5
119	2428.28	2681.99	1979.27	1834.33	3051.61	1879.92	2838.21	2076.22	2570.04	1919.51	1893.18		2581.19																													116.08	11.8		118.345	14.6
120	2399.41	2678.84	1994.74	1832	3054.25	1876.06	2837.04	2074.98	2579.36	1890.77	1874.31	3929.91	2589.94																													114.923	11.9		118.47	14.7
121	2414.01	2686.01	1976.47	1817.03	3052.09	1877.21	2837.06	2076.86	2582.97	1907.25	1888.91	3943.45	2612.98																													115.818	12		118.518	14.8
122	2413.47	2669.88	1992.55	1816.91	3062.48	1880.15	2838.25		2585.37	1898.22	1891	3940.94	2599.76																													115.946	12.1		118.361	14.9
123	2394.43	2676.84	1992.81		3068.3	1890.37	2838.47	2103.49	2589.25	1923.24	1898.17	3924.17	2603.6																													116.386	12.2		118.363	15
124	2450	2706.2	1994.04	1835.28	3064.14	1870.19	2843.47	2065.95	2589.88	1903.04	1890.88	3936.12	2605.84																													115.938	12.3		118.858	15.1
125	2425.24	2686.79		1840.37	3079.14	1885.62	2845.84	2079.83	2581.98	1908.33	1895.5	3957.72	2617.69																													116.222	12.4		118.458	15.2
126	2425.54	2677.82	2009.72	1822.61	3060.91	1899.21	2842.27		2593.18	1899.51	1901.43	3952.65	2609.12																													116.585	12.5		119.184	15.3
127		2688.2	1993.02	1829.56	3069.13	1893.07	2845.59		2586.12	1914.95	1892.67	3965.27	2612.91																													116.048	12.6		118.586	15.4
128	2388.47	2686.44	2003.09	1832.91	3060.88	1897.11	2846.8		2584.26	1908.28	1913.19	3967.57	2619.74																													117.307	12.7		118.687	15.5
129	2432.23	2705.28	1992.04	1827.01	3060.66	1898.63	2844.33		2589.27	1906.07	1904.65	3969.33	2619.07																													116.783	12.8		118.907	15.6
130	2420.15	2681.58	2008.45	1835.87	3074.91	1889.82	2849.76	2087.99	2585.08	1909.88	1917.91	3965.64	2618.9																													117.596	12.9		118.73	15.7
131	2420.66	2693.57	2002.35	1847.02	3057.87	1894	2844.58	2089.85			1912.74	3977.65	2608.98																													117.279	13		118.322	15.8
132	2431.31	2676.42	2004.48	1845.24	3077.14	1905.72	2855.58	2082.35	2615.35	1914.79	1889.44	3978.62	2619.31																													115.85	13.1		118.579	15.9
133	2433.79	2680.57	2006.67	1849.88	3071.29	1911.08	2853.45	2076.33	2598.15	1919.13	1896.12	3985.88	2600.27																													116.26	13.2		118.594	16
134	2439.32	2698.11	2007.56	1832.85	3076.95	1892.55	2859.79	2082.03	2604.82	1909.27	1911.75	3977.6	2620.03																													117.218	13.3		119.031	16.1
135	2434.55	2696.59	2002.76	1825.08	3078.2	1912.39	2837.46	2077.46	2597.99	1900.72	1908.29	3984.72	2613.09																													117.006	13.4		119.04	16.2
136	2431.28	2685.94	2008.02	1844.69	3067.3	1899.55	2842.72	2069.67	2591.57	1910.58	1908.93	3986.2	2622.43																													117.045	13.5		119.039	16.3
137	2424.45	2698.92	2006.14	1850.33	3076.51	1900.49	2855.16	2075.66	2602.86	1913.73	1920.43	3990.66																														117.751	13.6		118.681	16.4
138	2431.89	2700.45	1999.73	1827.38	3071.08	1915.08	2847.59	2073.49	2613.21	1911.29	1911.04	3982.13	2614.02																													117.174	13.7		118.984	16.5
139	2437.97	2707.47	1994.03	1838.75	3079.62	1914.01	2853.71	2082.84	2612.83	1900.14	1909.36	3987.28	2608.82																													117.072	13.8		119.113	16.6
140	2433		1997.48	1835.41	3081.82	1910.11	2848.87	2083.77	2595.06	1899.7	1916.84	3985.42	2605.54																													117.53	13.9		119.003	16.7
141	2437.17	2677.74	2016.98	1831.9	3082.89	1906.2	2844.57	2075.12	2586.49	1898.87	1925.83	3977.01	2611.14																													118.081	14		118.739	16.8
142	2444.13	2685.5	2011.36	1848.13	3078.24	1917.66	2847.02	2068.35	2611.1	1893.99	1917.12	3985.97	2607.52																													117.548	14.1		119.358	16.9
143	2427.02	2691.84	1989.62	1845.57	3077.24	1912.49	2862.13	2073.38	2608.04	1893.95	1938.48	3986.87	2611.8																													118.857	14.2		118.977	17
144	2427.52	2684.09	2009.51	1842.51	3082.49	1912.27	2843.98	2081.37	2600.28	1883.08	1927.68	3992.37	2609.78																													118.195	14.3		118.904	17.1
145	2435.47	2684.76	2010.65	1838.29	3078.52	1900.51	2836.95	2061.71	2597.85	1902.22	1927	3992.3	2604.09																													118.153	14.4		118.833	17.2
146	2446.5	2694.88	2014.95	1845.52	3075.7	1916.73	2842.51	2058.66	2610.23	1900.18	1926.08	3989.08	2605.82																													118.097	14.5		118.43	17.3
147	2446.33	2691.83	2005.42	1839.1	3073.01	1922.48	2837.99	2065.32	2588.82	1883.71	1930.12	3987.95	2605.72																													118.345	14.6		118.084	17.4
148	2447.79	2689.13	2017.44	1832.45	3070.38	1914.55	2849.84	2073.88	2617.76	1891.29	1932.17	3985.24	2605.73																													118.47	14.7		118.725	17.5
149	2429.63	2706.68	2021.55	1841.51	3059.9	1927.46	2848.41	2063.61	2606.71	1879.53	1932.96	3993.65	2604.48																													118.518	14.8		118.051	17.6
150	2435.73	2692.11	2021.78	1842.49	3053.18	1905.02	2810.29	2062.78	2599.81	1888.89	1930.38	3987.47	2599.86																													118.361	14.9		118.38	17.7
151	2438.31	2686.42	2005.7	1830.91	3063.63	1922.28	2836.44	2056.67	2601.57	1887.91	1930.41	3983.02	2603.57																													118.363	15		118.724	17.8
152	2435.82	2691.83	2009.57	1822	3066.27	1923.61	2827.17	2068.71	2610.35	1879.42	1938.5	3981.51	2596.8																													118.858	15.1		118.847	17.9
153	2440.3	2696.67	2016.73	1839.85	3060.38	1912.61	2825.89	2065.04	2614	1889.15	1931.96	3983.92	2594.3																													118.458	15.2		119.006	18
154	2439.47	2701.73	2015.52	1839.15	3060.81	1917.07	2809.49	2059.98	2594.08	1884.43	1943.8	3987.9	2593.69																													119.184	15.3		118.15	18.1
155	2447.85	2685.24	2011.45	1842.33	3054.91	1917.71	2816.94	2063.98	2595.19	1892.01	1934.06	3984.26	2585.1																													118.586	15.4		119.068	18.2
156	2440.16	2682.23	2020.24	1843.11	3065.71	1922.25	2821.9	2054.05	2600.85	1879.48	1935.71	3992.75	2590.76																													118.687	15.5		118.927	18.3
157	2458.7	2691.56	2012.64	1846.13	3051.68	1924.69	2812.76	2060.03	2606.55	1871.97	1939.29		2589.21																													118.907	15.6		118.703	18.4
158	2449.99	2690.79	2021.31	1825.49	3051.85	1911.49	2819.23	2062.27	2609.6	1890.93	1936.41	4002.73	2591.72																													118.73	15.7		119.098	18.5
159	2434.78	2685.08	2009.91	1839.06	3056.17	1913.5	2821.88	2065.86	2600.73	1864.44	1929.75	3990.96	2589.47																													118.322	15.8		118.211	18.6
160	2441.38	2697.81	2027.66	1845.94	3058.2	1918.85	2814.9	2046.93	2615.66	1862.04	1933.94	3981.52	2589.61																													118.579	15.9		118.967	18.7
161	2431.5	2701.04	2009.77	1846.69	3049.81	1927.48	2814.3	2041.44	2610.79	1860.64	1934.19	3983.17	2598.36																													118.594	16		118.64	18.8
162	2439.82	2697.03	2024.17	1834.38	3050.16	1913.36	2820.49		2609.7	1869.2	1941.31	3985.73	2587.73																													119.031	16.1		119.17	18.9
163	2437.54	2691.08	2006.78	1842.7	3052.9	1917.69	2804.56		2599.15	1874.95	1941.47	3992.89	2581.65																													119.04	16.2		118.616	19
164	2455.22	2700.06	1994.95	1833.1	3059.45	1926.3	2813.45	2049.74	2606.61	1876.56	1941.45	3986.56	2572.21																													119.039	16.3		118.602	19.1
165	2446.31	2686.08	2011.98	1836.75	3027.92	1925.89	2809.47	2048.1	2596.39	1876.62	1935.6	3993.4	2583.44																													118.681	16.4		118.43	19.2
166	2439.48	2700	2006.28	1849.08	3034.1	1935.28	2817.8	2060.41	2608.04	1860.56	1940.55	3996.72	2574.09																													118.984	16.5		118.707	19.3
167	2467.74	2693.82	2019.08	1850.9	3054.52	1935.59	2803.19	2049.89	2614.8	1868.88	1942.65	3988.32	2577.42																													119.113	16.6		118.606	19.4
168	2452.33	2676.54	2012.7	1847.39	3030.42	1924.47	2812.44	2040.24	2598.7	1856.23	1940.86	3994.48	2573.12																													119.003	16.7		118.74	19.5
169	2443.2	2690.26	2017.71	1830.85	3036.37	1931.59	2804.23	2043.35	2610.62	1867.71	1936.55	4003.6	2578.92																													118.739	16.8		118.618	19.6
170	2439.81	2690.26	2013.26	1844.23	3047.17	1920.8	2809.74	2051.36	2615.34	1859.05	1946.65	4007.38	2582.24																													119.358	16.9		118.35	19.7
171	2442.57	2690.58	2026.11	1839.18	3047.94	1933.56	2802.56	2036.92	2614.24	1855.89	1940.43	3988.57	2567.17																													118.977	17		118.661	19.8
172	2456.12	2676.97	2015.16	1840.67	3043.29	1929.52	2801.17	2046.8	2619.85	1861.18	1939.24	3982.97	2578.15																													118.904	17.1		118.563	19.9
173	2441.25	2687.02	2006.97	1845.64	3032.45	1918.76	2795.47	2035.52	2603.72	1851.33	1938.09	3990.25	2572.81																													118.833	17.2		117.889	20
174	2452.93	2694.39	2008.4	1835.41	3030.19	1930.94	2783.3	2029.06	2602.36	1856.07	1931.52	3983.34	2563.38																													118.43	17.3		119.507	20.1
175	2442.07	2678.15	2014.69	1848.06	3030.56	1920.27	2787.74	2038.85	2611.13	1852.19	1925.87	4001.41	2557.1																													118.084	17.4		118.534	20.2
176	2453.31	2676.03	2010.18	1833.34	3026.84	1917.67	2774.25	2044.88	2614.79	1838.26	1936.32	3977.64	2553.59																													118.725	17.5		119.124	20.3
177	2448.05	2672.35	2001.64	1848.33	3028.03	1923.68	2777.77	2022.77	2621.06	1847.66	1925.33	3983.72	2563.15																													118.051	17.6		118.487	20.4
178	2445.2	2686.57	2013.49	1839.22	3023.22	1924.32	2765.78	2043.94	2604.93	1843.24	1930.7	3975.99	2558.56																													118.38	17.7		119.27	20.5
179	2460.7	2670.44	2012.81	1835.13	3022	1920.86	2783.88	2031.49	2613.52	1855.36	1936.3	3994.16	2548.11																													118.724	17.8		118.875	20.6
180	2443.89	2681.18	2004.52	1846.44	3020.25	1928.3	2784.78	2035.96	2608.47	1848.83	1938.31	3996.56	2562.3																													118.847	17.9		119.08	20.7
181	2443.63	2667.73	2002.73	1828.99	3003.93	1922.72	2777.2	2029.74	2614.01	1843.9	1940.9	3986.43	2546.67																													119.006	18		119.216	20.8
182	2439.28	2671.74	2004.74	1836.07	3019.24	1926.49	2774.27	2028.6	2603.76	1844.96	1926.95	3996.35	2559.06																													118.15	18.1		118.831	20.9
183	2458.32	2659.34	2015.13	1857.58	3019.42	1912.94	2773.91	2032.05	2620.39	1836.13	1941.91	3978.7	2547.07																													119.068	18.2		118.793	21
184	2438.97	2672.52	2011.92	1853.81	3008.86	1936.34	2755.14	2017	2616.35	1845.64	1939.61	3991.81	2547.97																													118.927	18.3		118.788	21.1
185	2453.65	2674.03	2009.82	1826.6	3009.75	1922.3	2767.09	2021.23	2620.09	1831.15	1935.96	3991.9	2543.99																													118.703	18.4		119.121	21.2
186	2437.33	2660.93	2015.94	1850.01	2998.22	1911.64	2754.16	2028.79	2589.51	1833.77	1942.41	3983.88	2531.75																													119.098	18.5		118.925	21.3
187	2437.53	2654.44	2020.4	1834.59	3014.17	1923.11	2760.81	2031.69	2602.67	1827.56	1927.94	3979.49	2537.61																													118.211	18.6		119.033	21.4
188	2434.82	2658.27	2008.19	1838.14	3014.73	1922.18	2759.17	2017.84	2606.29	1837.76	1940.26	3987.3	2534.58																													118.967	18.7		119.217	21.5
189	2452.32	2658.83	2011.77	1829.87	3013.74	1920.58	2753.61	2029.21	2612.78	1836.12	1934.94	3986.39	2538.22																													118.64	18.8		118.935	21.6
190	2454.2	2654.52	2000.25	1829.89	2994.22	1911.96	2746.79	2034.71	2604.32	1838.48	1943.59	3987.05	2528.68																													119.17	18.9		118.525	21.7
191	2452.98	2651.32	2003.39	1839.24	3000.17	1928.93	2752.09	2029.11	2606.39	1837.35	1934.54	3986.2	2530.89																													118.616	19		119.197	21.8
192	2443.58	2654.95	2029.37	1843.24	2985.91	1925.86	2730.86	2011.4	2598.44	1830.14	1934.31	3974.1	2526.21																													118.602	19.1		119.09	21.9
193	2449.22	2660.18	2019.76	1835.05	3005.03	1932.19	2753.86	2017.13	2601.98	1816.15	1931.51	3992.57	2527.86																													118.43	19.2		118.597	22
194	2453.71	2659.71	2019.04	1844.28	3001.83	1921.23	2725.79	2018.07	2599.48	1822.31	1936.03	3984.95	2529.42																													118.707	19.3		119.278	22.1
195	2441.4	2656.03	2016.5	1836.4	2987.17	1926.75	2742.35	2018.18	2601.85	1835.27	1934.39	3980.23	2509.95																													118.606	19.4		118.579	22.2
196	2441.23	2661.19	2008.01	1831.66	2990.82	1924.13	2735.59	2022.25	2592.03	1827.75	1936.57	3975.99	2515.43																													118.74	19.5		117.67	22.3
197	2440.19	2652.13	2008.94	1835.99	2985.99	1915.92	2728.68	2032.71	2613.34	1829.11	1934.58	3979.97	2521.24																													118.618	19.6		117.921	22.4
198	2445.02	2660.28	2009.43	1847.14	2978.34	1915.53	2736.69	2018.45	2609.88	1827.1	1930.21	3986.22	2516.48																													118.35	19.7		118.678	22.5
199	2452.73	2649.96	2008.19	1825.04	2988.27	1933.33	2743.12	2025.19	2620.29	1810.16	1935.29	3985.09	2503.13																													118.661	19.8		119.328	22.6
200	2444.54	2639.3	2012.45	1817.43	2994.12	1939.89	2736.22	2017.18	2606.49	1816.91	1933.68	3985.16	2504.81																													118.563	19.9		118.726	22.7
201	2449.02	2655.78	1999.57	1833.27	2992.24	1920.09	2742.53	2012.62	2615.98	1816.32	1922.69	3983.87	2509.4																													117.889	20		119.033	22.8
202	2450.86	2640.63	2000.29	1823.95	2968.2	1931.61	2736.94	2018.97	2591.46	1812.82	1949.07	3985.81	2506.14																													119.507	20.1		118.421	22.9
203	2434.51	2632.78	1997.26	1845.33	2982.05	1949.84	2733.55	2004.22	2609.4	1822.65	1933.2	3990.63	2507.17																													118.534	20.2		118.689	23
204	2451.84	2638.84	2002.89	1832.83	2976.27	1934.36	2743.96	2020.26	2605.77	1820.25	1942.84	3988.79	2500.56																													119.124	20.3		119.355	23.1
205	2443.41	2633.58	2017.93	1836.91	2977.04	1934.63	2737.62	2013.11	2621.75	1813.09	1932.44	4002.04	2504.74																													118.487	20.4		119.293	23.2
206	2458.31	2624.56	2003.88	1825.74	2970.05	1937.37	2732.57	2005.43	2596.53	1805.39	1945.22	3989.12	2502.21																													119.27	20.5		119.107	23.3
207	2432.81	2636.04	2025.58	1840.21	2972.98	1937.86	2731.72	2010.63	2610.59	1818.75	1938.77	3984.11	2498.12																													118.875	20.6		118.274	23.4
208	2447.55	2651	2019.34		2971.17	1938.23	2728.9	2016.47	2610.42	1817.18	1942.11	3994.38	2501.42																													119.08	20.7		119.069	23.5
209	2453.45	2644.29	2014.29		2984.97	1939.38	2733.05	2011.94	2607.15	1822.88	1944.34	3986.08	2493.31																													119.216	20.8		118.315	23.6
210	2443.67	2637.98	2015.02		2970.02	1919.94	2715.77	2013.26	2604.29	1810.75	1938.05	3993.12	2491.62																													118.831	20.9		118.885	23.7
211	2436.29	2634.91	2006.49	1834.94	2978.64	1929.13	2728.52	2005.3	2613.96	1809.03	1937.44	3986.17	2485.09																													118.793	21		119.288	23.8
212	2442.32	2635.6	2008	1835.02	2981.23	1933.92	2723.59	1996.11	2611.54	1796.98	1937.35	3990.05	2492.77																													118.788	21.1		118.735	23.9
213	2433.64	2636.17	2001.69	1831.9	2970.7	1925.85	2720.9	2016.53	2615.44	1799.36	1942.78	3991.65	2491.48																													119.121	21.2		119.041	24
214	2427.44	2638.23	2006.8	1828.55	2963.55	1918.28	2719.08	2002.67	2611.99	1804.77	1939.59	3986.66	2484.57																													118.925	21.3		118.885	24.1
215	2443.12	2634.85	1999.12	1831.49	2958.82	1912.62	2705.39	2018.89	2587.72	1806.64	1941.35	3985.72	2477.21																													119.033	21.4		118.621	24.2
216	2444.43	2637.99	2016.92	1841.31	2963.99	1921.07	2721.92	2002.6	2598.27	1797.2	1944.35	3992.63	2473.3																													119.217	21.5		118.579	24.3
217	2444.09	2629.16	2007.92	1832.89	2958.67	1928.32	2704.7	2002.98	2589.79	1803.88	1939.75	3991.6	2479.36																													118.935	21.6		118.852	24.4
218	2462.01	2639.83	2005.16	1819.88	2955.14	1931.92	2714.49	2012.95	2598.48	1800.79	1933.07	3981.69	2474.4																													118.525	21.7		118.858	24.5
219	2436.23	2636.06	2006.34	1823.87	2957.23	1933.87	2704.37	2007.4	2598.62	1789.46	1944.02	3996.85	2473.81																													119.197	21.8		118.861	24.6
220	2438.1	2642.52	2008.55	1839.07	2956.29	1927.26	2695.6	2004.79	2604.22	1796.89	1942.27	3980.17	2466.84																													119.09	21.9		119.361	24.7
221	2435.26	2639.36	2011.52	1841.55	2947.9	1924.51	2696	2016.17	2604.24	1798.81	1934.23	3991.52	2466.63																													118.597	22		118.515	24.8
222	2446.02	2644.43	2012.15	1821.81	2950.04	1930.63	2692.27	1990.18	2596.08	1793.16	1945.34	3974.08	2458.43																													119.278	22.1		119.013	24.9
223	2440.17	2645.25	2011.32	1824.38	2956.56	1915.33	2686.52	2001.68	2599	1800.48	1933.94	3979.01	2456.73																													118.579	22.2		118.228	25
224	2438.29	2645.57	2010.58	1822.89	2948.68	1915.78	2679.67	2002.61	2592.58	1793	1919.12	3992.61	2460.87																													117.67	22.3		119.367	25.1
225	2440.19	2632.6	2004.84	1824.5	2956.09	1927.08	2691.26	1989.92	2608.94	1791.92	1923.22	3991.15	2458.82																													117.921	22.4		118.601	25.2
226	2439.56	2632.44	2009.85	1830.66	2942.7	1920.58	2676.02	2009.41	2591.49	1777.72	1935.56	3992.21	2463.58																													118.678	22.5		119.486	25.3
227	2441.98	2634.83	1996.83	1835.51	2957.25	1918.8	2674.45	1990.23	2591.03	1781.17	1946.16	3987.57	2465.31																													119.328	22.6		118.623	25.4
228	2447.59	2630.68	2003.26	1828.54	2943.06	1938.61	2666.69	2003.89	2582.56	1779.54	1936.34	3974.46	2451.5																													118.726	22.7		118.948	25.5
229	2439.12	2644.65	2012.07	1832.42	2935.36	1931.85	2669.77	2003.75	2600.02	1779.32	1941.35	3977.22	2439.63																													119.033	22.8		118.814	25.6
230	2437.15	2639.23	2008.5	1818.7	2943.09	1921.45	2687.45	2004.13	2605.07	1783.46	1931.36	3991.15	2455.11																													118.421	22.9		118.965	25.7
231	2447.82	2643.17	2017.45	1840.59	2938.49	1916.58	2667.39	2006.87	2584.82	1771.37	1935.74	3978.33	2454.51																													118.689	23		119.915	25.8
232	2438.92	2633.76	1995.94	1839.98	2939.51	1920.9	2666.81	2003.91	2593.63	1777.93	1946.59	3979.6	2432.46																													119.355	23.1		119.005	25.9
233	2443.96	2618.4	2002.74	1816.57	2945.17	1929.61	2662.31	1982.48	2595.47	1779.12	1945.59	3979.1	2442.44																													119.293	23.2		118.032	26
234	2428.63	2630.36	1999.9	1822.69	2929.32	1922.62	2670	2006.59	2593.61	1779.18	1942.56	3976.78	2435.69																													119.107	23.3		118.562	26.1
235	2440.67	2650.25	1997.63	1821.94	2931.9	1927.26	2664.69	2005.03	2593.26	1769.12	1928.97	3979.22	2432																													118.274	23.4		119.223	26.2
236	2429	2631.78	2000.8	1822.18	2928.66	1938.26	2667.77	1993.44	2596.24	1768.95	1941.93	3970.51	2440.55																													119.069	23.5		118.566	26.3
237	2440.86	2627.79	2013.84	1821.22	2933.15	1909.42	2657.74	2004.22	2590.85	1764.41	1929.63	3982.12	2430.05																													118.315	23.6		118.837	26.4
238	2431.04	2634.39	1998.67	1820.38	2926.54	1928.8	2668.39	2002.48	2584.96	1780.63	1938.93	3998.95	2436.18																													118.885	23.7		118.905	26.5
239	2438.03	2637.58	1992.57	1820.75	2924.41	1912.92	2654.58	1996.42	2591.06	1776.37	1945.51	3988.32	2423.85																													119.288	23.8		118.548	26.6
240	2430.74	2635.88	1992.15	1824.7	2927.49	1921.47	2656.15	2001.39	2591.57	1783.86	1936.49	3989.38	2424.78																													118.735	23.9		118.97	26.7
241	2430.58	2608.16	1997.62	1822.8	2930.59	1932.23	2668.02	1999.67	2592.88	1776.36	1941.48	3977.66	2415.67																													119.041	24		118.811	26.8
242	2429.6	2623.93	2001.17	1812.89	2929.47	1938.66	2670.72	1997.92	2594.56	1773.18	1938.94	3986.99	2420.54																													118.885	24.1		118.614	26.9
243	2438.15	2615.97	2007.94	1813.71	2923.59	1927.86	2669.38	1983.08	2597.52	1777.3	1934.63	3982.39	2414.54																													118.621	24.2		118.278	27
244	2450	2625.76	1991.8	1818.05	2927.55	1930.1	2652.2	2001.41	2602.25	1761.33	1933.94	3986.02	2425.82																													118.579	24.3		118.456	27.1
245	2434.79	2611.94	2000.58	1831.8	2922.66	1929.14	2652.58	1988.39	2587.27	1762.52	1938.4	3984	2419.08																													118.852	24.4		119.006	27.2
246	2435.79	2621.75	2007.54	1826.67	2935.53	1932.03	2649.22	1999.03	2592.97	1760.53	1938.49	3978.81	2415.49																													118.858	24.5		118.632	27.3
247	2440.13	2623.01	1999.9	1822.84	2906.93	1926.31	2643.88	1994.31	2596.02	1754.32	1938.54	3969.66	2418.18																													118.861	24.6		118.262	27.4
248	2443.38	2623.58	1991.69	1828.17	2914.55	1924.46	2660.34	2004.18	2585.44	1757.09	1946.7	3977.71	2422.34																													119.361	24.7		118.503	27.5
249	2431.16	2609.21	1999.82	1828.08	2920.11	1936.52	2648.91	1972.59	2589.95	1754.17	1932.9	3978.96	2409.1																													118.515	24.8		118.338	27.6
250	2432.84	2607.36	1996.16	1827.66	2893.73	1936.19	2649.42	2000.63	2607.42	1748.67	1941.02	3991.96	2408.42																													119.013	24.9		117.608	27.7
251	2443.1	2608.69	1993.43	1829.53	2903.59	1936.54	2647.51	1984.55	2589.37	1755.48	1928.21	3992.43	2396.34																													118.228	25		118.682	27.8
252	2436.58	2596.02	1994.32	1822.52	2901.97	1934.59	2654.3	1989.18	2608.24	1750.66	1946.8	3982.66	2402.87																													119.367	25.1		118.911	27.9
253	2423.11	2606.53	1992.44	1818.88	2907.69	1929.33	2659.11	1985.85	2596.2	1737.43	1934.3	3971.41	2408.35																													118.601	25.2		118.27	28
254	2413.01	2602.3	2007.84	1826.97	2902.98	1922.63	2641.9	1986.72	2601.19	1731.85	1948.74	3984.35	2399.1																													119.486	25.3		118.067	28.1
255	2418.24	2602.63	2012.42	1821.1	2891.32	1919.67	2628.09	1986.95	2591.99	1732.2	1934.66	3985.33	2407.09																													118.623	25.4		119.103	28.2
256	2433.53	2603.33	1999.71	1808.87	2896.44	1922.46	2615.36	1977.59	2594.71	1742.02	1939.97	3989.26	2391.32																													118.948	25.5		118.584	28.3
257	2435.55	2601.03	2006.42	1833.23	2898.79	1928.9	2624.83	1976.16	2589.4	1733.45	1937.77	3984.92	2399.43																													118.814	25.6		118.58	28.4
258	2431.35	2604.92	1995.41	1832.29	2890.46	1924.17	2613.59	1998.03	2597.4	1737.64	1940.24	3989.69	2401.35																													118.965	25.7		118.805	28.5
259	2420.18	2583.26	1993.64	1813.97	2882.71	1933.15	2611.96	1973.13	2585.47	1722.08	1955.73	3974.25	2388.11																													119.915	25.8		119.203	28.6
260	2429.24	2598.87	1992.35	1814.4	2890.99	1904.13	2605.52	1991.82	2592.12	1730.29	1940.89	3983.35	2380.93																													119.005	25.9		118.616	28.7
261	2432.33	2595.72	1992.9	1812.16	2888.9	1923.85	2601.1	1978.18	2588.75	1751.69	1925.03	3980.9	2381.04																													118.032	26		118.797	28.8
262	2427.51	2592.81	1996.66	1818.62	2882.05	1932.27	2600.26	1981.97	2586.15	1733.3	1933.67	3986.18	2385.59																													118.562	26.1		118.718	28.9
263	2435.17	2589.35	1992.63	1808.74	2877.72	1939.79	2594.95	1990.17	2589.35	1726.83	1944.44	3981.16	2378.21																													119.223	26.2		118.567	29
264	2434.84	2568	1982.87	1828.49	2873.43	1915.13	2600.92	1986.06	2581	1722.47	1933.74	3969.41	2380.7																													118.566	26.3		118.8	29.1
265	2429.42	2580.26	1999.38	1820.47	2867	1929.93	2594.26	1979.67	2578.98	1722.74	1938.16	3982.45	2377.13																													118.837	26.4		118.07	29.2
266	2428	2573.65	1986.62	1820.76	2873.71	1922.64	2599.99	1988.02	2584.34	1706.17	1939.26	3983.46	2376.22																													118.905	26.5		118.461	29.3
267	2435.49	2575.07	1993.87	1824.1	2864.79	1926.6	2589.19	1981.49	2589.12	1716.87	1933.44	3985.95	2369.14																													118.548	26.6		118.679	29.4
268	2445.82	2578	1995.64	1806.04	2876.72	1926.8	2593.06	1990.33	2589.58	1714.45	1940.33	3978.26	2361.11																													118.97	26.7		119.247	29.5
269	2418.44	2575.38	1999.41	1818.13	2863.48	1922.39	2582.15	1979.24	2588.31	1713.5	1937.73	3978.14	2356.59																													118.811	26.8		118.689	29.6
270	2425.68	2570.64	1989.24	1814.76	2858.11	1935.27	2593.08	1983.21	2586.8	1725.02	1934.51	3978.84	2364.61																													118.614	26.9		118.364	29.7
271	2433.35	2570.14	1989.16	1812.98	2856.59	1922.16	2585.31	1976.82	2597.64	1717.22	1929.04	3987.9	2362.23																													118.278	27		118.253	29.8
272	2430.61	2566.4	1985.81	1815.85	2857.87	1924.39	2595.77	1978.8	2594.84	1715.5	1931.93	3981.74	2374.51																													118.456	27.1		118.645	29.9
273	2429.78	2559.16	1995.33	1807.63	2854.06	1920.16	2587.2	1977.08	2592.02	1705.38	1940.9	3978.51	2370.23																													119.006	27.2		118.257	30
274	2433.34	2549.97	1989.58	1801.15	2863.75	1917.54	2595.2	1966.69	2600.23	1707.31	1934.81	3982.71	2360.66																													118.632	27.3		118.308	30.1
275	2428.06	2547.02	1995.34	1793.35	2855.36	1915.02	2575.62	1990.98	2593.84	1698.82	1928.78	3983.1	2354.76																													118.262	27.4		118.332	30.2
276	2435.53	2561.1	2008.06	1803.49	2850.94	1937.15	2592.75	1967.8	2598.11	1705.53	1932.7	3981.88	2355.29																													118.503	27.5		118.26	30.3
277	2440.51	2557.85	2003.12	1810.33	2840.05	1918.19	2593.92	1974.6	2607.72	1695.58	1930.01	3976.15	2352.21																													118.338	27.6		118.571	30.4
278	2430.78	2563.36	1991.07	1803.15	2829.88	1921.77	2578.3	1973.46	2593.06	1695.83	1918.11	3977.29	2354.29																													117.608	27.7		118.062	30.5
279	2432.91	2545.58	2003.17	1800.51	2846.92	1922.98	2574.26	1973.73	2591.24	1694.13	1935.63	3980.5	2346																													118.682	27.8		118.031	30.6
280	2431.66	2558.33	1995.32	1800.03	2841.87	1938.56	2580	1966.42	2599.25	1698.4	1939.36	3981.01	2349.16																													118.911	27.9		118.519	30.7
281	2415.06	2551.01	1998.6	1802.84	2834.23	1913.05	2572.47	1966.08	2592.81	1690.94	1928.9	3981.24	2341.46																													118.27	28		118.189	30.8
282	2418.78	2554.41	1991.62	1795.09	2820.3	1919.52	2572.89	1979.88	2594.05	1692.25	1925.6	3980.87	2350.91																													118.067	28.1		117.993	30.9
283	2432.91	2548.32	1990.01	1804.67	2831.63	1933.85	2560.46	1979.04	2585.32	1682.52	1942.48	3984.81	2349.93																													119.103	28.2		117.449	31
284	2421.83	2557.88	1986.61	1784.41	2829.11	1925.2	2558.08	1963.89	2581.76	1692.36	1934.02	3994.45	2344.69																													118.584	28.3		117.571	31.1
285	2432.92	2543.8	1997.95	1799.47	2828.19	1933.27	2548.08	1981.84	2577.95	1689.2	1933.96	3979.29	2327.42																													118.58	28.4		118.185	31.2
286	2434.21	2544.27	1999.42	1802.85	2815.86	1932.48	2557.25	1967	2605.6	1694.22	1937.63	3973.57	2338.67																													118.805	28.5		118.831	31.3
287	2434.92	2554.65	1996.93	1806.17	2817.04	1921.33	2556.93	1980.32	2591.04	1687.45	1944.12	3973.55	2342.16																													119.203	28.6		118.869	31.4
288	2432.99	2536.91	1991.98	1786.67	2813.7	1916.49	2550	1972.69	2594.49	1679.75	1934.55	3992.74	2323.61																													118.616	28.7		118.931	31.5
289	2419.94	2555.14	1988.74	1794.89	2807.47	1917.65	2569.76	1975.28	2585.73	1680.27	1937.49	3978.49	2323.22																													118.797	28.8		118.038	31.6
290	2436.13	2534.05	1987.63	1788.35	2808.28	1914.94	2537.03	1958.46	2593.14	1680.23	1936.21	3977.33	2337.58																													118.718	28.9		118.83	31.7
291	2424.13	2533.2	1982.19	1797.15	2788.74	1913.68	2550.44	1980.33	2577.63	1679.8	1933.75	3978.95	2340.14																													118.567	29		118.386	31.8
292	2430.76	2539.35	1992.99	1796.41	2795.9	1915.32	2526.53	1957.91	2586.87	1673.71	1937.55	3971.49	2329.89																													118.8	29.1		118.649	31.9
293	2437.99	2545.64	1994.11	1804.76	2805.56	1915.7	2532.49	1967.46	2579.99	1676.88	1925.64	3987.07	2326.89																													118.07	29.2		118.59	32
294	2423.62	2542.37	1992.47	1795.42	2792.45	1909.45	2539.61	1958.28	2575.01	1674.69	1932.03	3985.68	2329.2																													118.461	29.3		117.926	32.1
295	2421.65	2525.16	1979.42	1792.9	2793.12	1918.35	2526.53	1968.71	2587.48	1671.99	1935.57	3980.23	2330.6																													118.679	29.4		118.034	32.2
296	2429.23	2535.05	1970.84	1793.17	2790.92	1924.62	2520.1	1958.46	2592.04	1669.84	1944.83	3984.65	2312.53																													119.247	29.5		118.018	32.3
297	2421.11	2520.36	1992.3	1796.44	2787.51	1917.41	2533.14	1963.16	2583.62	1669.77	1935.74	3987.66	2329.21																													118.689	29.6		118.074	32.4
298	2425.53	2539.01	1981.2	1786.5	2789.08	1920.78	2520.83	1953.07	2582.87	1673.17	1930.44	3981.4	2324.4																													118.364	29.7		119.158	32.5
299	2428.62	2507.18	1986.51	1775.67	2769.77	1914.28	2514.99	1965.6	2577.01	1688.33	1928.62	3979.55	2332.83																													118.253	29.8		118.532	32.6
300	2417.11	2526.45	1988.91	1775.34	2774.05	1922.49	2522.6	1962.43	2591.23	1670.01	1935.02	3967.36	2314.86																													118.645	29.9		118.554	32.7
301	2438.47	2526.59	1994.05	1797.18	2765.18	1923.28	2514.48	1971.32	2569.31	1676.34	1928.69	3972.66	2312.62																													118.257	30		118.566	32.8
302	2431.93	2524.6	1982.76	1774.36	2768.54	1911.58	2513.09	1962.1	2582.97	1671.35	1929.53	3986.57	2311.5																													118.308	30.1		118.918	32.9
303	2424.7	2527.78	1981.5	1788.27	2758.37	1922.54	2508.26	1964.84	2573.34	1660.07	1929.92	3970.37	2311.36																													118.332	30.2		117.724	33
304	2415.89	2519.86	1969.05	1794.09	2762.06	1928.25	2520.78	1963.16	2586.74	1666.64	1928.75	3979.88	2306.23																													118.26	30.3		118.251	33.1
305	2413.65	2519.82	1976.24	1780.14	2762.86	1918.02	2515.41	1963.13	2591.27	1672.16	1933.81	3975.5	2309.04																													118.571	30.4		118.322	33.2
306	2425.75	2517.03	1981.97	1786.42	2773.18	1927.11	2509.31	1956.04	2592.77	1658.69	1925.51	3981.59	2292.05																													118.062	30.5		118.225	33.3
307	2422.07	2511.05	1975.84	1779.08	2753.69	1916.38	2510.96	1953.11	2593.56	1654.37	1925	3980.97	2312.23																													118.031	30.6		118.836	33.4
308	2410.02	2505.46	1977.04	1775.08	2744.86	1917.43	2518.77	1960.8	2590.9	1646.22	1932.96	3974.48	2290.92																													118.519	30.7		118.177	33.5
309	2413.03	2508.43	1976.22	1789.49	2754.16	1921.59	2509.33	1955.01	2583.77	1649.28	1927.58	3966.59	2288.7																													118.189	30.8		118.186	33.6
310	2411.73	2513.98	1964.44	1784.09	2749.17	1933.86	2506.04	1949.58	2592.52	1661.4	1924.38	3982.77	2299.57																													117.993	30.9		117.608	33.7
311	2412.5	2516.15	1973.55	1787.89	2742.78	1930.14	2514.84	1951.01	2588.93	1650.62	1915.51	3977.22	2295.02																													117.449	31		118.313	33.8
312	2425.24	2507.33	1978.28	1777.39	2739.71	1934.62	2509.1	1953.78	2586.72	1656.51	1917.51	3979.19	2294.89																													117.571	31.1		118.432	33.9
313	2423.96	2508.3	1976.28	1776.81	2745.96	1928.84	2506.98	1938.7	2580.24	1643.78	1927.52	3966.21	2304.61																													118.185	31.2		118.702	34
314	2413.74	2498.09	1968.79	1769.87	2737.32	1926.05	2502.39	1947.25	2589.01	1649.84	1938.06	3981.76	2295.85																													118.831	31.3		118.325	34.1
315	2423.71	2500.72	1978.57	1764.53	2737.12	1914.25	2512.27	1958.98	2596.38	1651.5	1938.67	3978.5	2294.47																													118.869	31.4		118.583	34.2
316	2405.86	2495.92	1980.17	1766.11	2735.56	1929.84	2497.91	1952.61	2602.03	1647.11	1939.69	3977.52	2291.49																													118.931	31.5		118.957	34.3
317	2415.7	2493.33	1978.42	1771.06	2730.66	1927.07	2488.45	1943.07	2596.26	1648.76	1925.12	3980.69	2284.65																													118.038	31.6		118.1	34.4
318	2412.55	2484.44	1965.87	1773.71	2736.09	1917.79	2492.58	1934.75	2581.76	1661.27	1938.04	3971.31	2291.12																													118.83	31.7		117.26	34.5
319	2417.12	2490.63	1971.44	1763.14	2727.89	1933.75	2492.52	1949.55	2589.31	1642.7	1930.79	3982.36	2284.28																													118.386	31.8		117.949	34.6
320	2422.55	2487.62	1974.87	1766.81	2731.18	1918.31	2488.47	1947.51	2597.46	1647.6	1935.09	3977.16	2289.76																													118.649	31.9		118.35	34.7
321	2427.62	2488.7	1968.22	1769.25	2716.81	1914.53	2486.68	1937.4	2573.87	1650.21	1934.13	3979.79	2283.89																													118.59	32		117.946	34.8
322	2412.41	2484.96	1974.32	1767.32	2720.22	1926.82	2484.31	1938.69	2593.77	1644.87	1923.29	3980.62	2266.43																													117.926	32.1		118.695	34.9
323	2411.17	2482.79	1966.32	1762.82	2703.51	1926.54	2491.18	1943.5	2579.86	1649.99	1925.06	3984.66	2279.79																													118.034	32.2		117.91	35
324	2416.53	2489.38	1972.86	1776.39	2709.98	1921.87	2500.03	1938.69	2580.37	1636.62	1924.79	3972.43	2275.46																													118.018	32.3		118.045	35.1
325	2419.55	2462.5	1969.8	1757.83	2708.59	1918.2	2487.3	1935.6	2591.53	1631.33	1925.71	3965.19	2276.77																													118.074	32.4		118.158	35.2
326	2421.58	2472.93	1970.8	1762.79	2716.03	1935.46	2479.25	1920.15	2584.56	1641.37	1943.38	3977.78	2275.85																													119.158	32.5		118.747	35.3
327	2403.75	2470.76	1964.77	1743.26	2701.22	1917.19	2478.26	1936.64	2590.88	1631.01	1933.17	3982.87	2277.2																													118.532	32.6		118.009	35.4
328	2416.51	2483.56	1977.04	1746.98	2705.99	1908.92	2478.11	1914.17	2585.9	1635.34	1933.53	3975.85	2279.53																													118.554	32.7		117.784	35.5
329	2423.55	2466.55	1965.59	1758.89	2713.37	1931.54	2476.7	1919.8	2593.69	1627.73	1933.74	3975.94	2277.36																													118.566	32.8		117.965	35.6
330	2412.19	2477.78	1956.06	1755.13	2705.37	1932.58	2471	1922.28	2580.83	1641.19	1939.47	3979.54	2279.82																													118.918	32.9		118.125	35.7
331	2400.67	2466.48	1955.23	1759.44	2702.77	1916.57	2453.56	1914.46	2573.96	1617.79	1919.99	3982.69	2270.97																													117.724	33		118.283	35.8
332	2416.55	2468.07	1967.46	1755.49	2699.51	1921.74	2472.61	1916.01	2576.18	1640.82	1928.6	3975.58	2266.68																													118.251	33.1		117.848	35.9
333	2423.34	2467.12	1947.95	1757.81	2703.43	1915.93	2466.15	1924.74	2575.89	1644.47	1929.75	3977.82	2274.65																													118.322	33.2		118.062	36
334	2410.51	2468.02	1962.24	1760.93	2701.14	1914.89	2464.36	1907.04	2580.81	1630.04	1928.18	3981.54	2269.87																													118.225	33.3		118.076	36.1
335	2407.48	2466.54	1960.22	1751.02	2703.39	1908.22	2466.72	1909.59	2572.21	1627.05	1938.13	3974.89	2279.03																													118.836	33.4		118.388	36.2
336	2417.84	2467.43	1961.44	1765.6	2696.14	1922.83	2462.72	1911.15	2597.26	1621.8	1927.39	3965.01	2261.63																													118.177	33.5		118.311	36.3
337	2392.09	2465.27	1962.22	1746.44	2690.31	1915.19	2465.97	1906.6	2576.29	1616.13	1927.53	3970.77	2257.56																													118.186	33.6		118.301	36.4
338	2408.79	2469.29	1952.93	1750.33	2698.25	1924.29	2466.85	1913.28	2583.18	1632	1918.1	3966.5	2258.26																													117.608	33.7		118.438	36.5
339	2407.09	2442.34	1961.4	1749.77	2684.79	1922.69	2461.87	1894.24	2580.15	1610.54	1929.6	3968.62	2257.34																													118.313	33.8		118.464	36.6
340	2410.77	2462	1943.43	1739.09	2682.07	1910.57	2452.38	1915.13	2573.54	1618.67	1931.55	3966.09	2270.8																													118.432	33.9		118.954	36.7
341	2388.24	2459.7	1966.84	1755	2686.22	1918.48	2447.75	1896.58	2578.34	1623.35	1935.96	3984.42	2261.92																													118.702	34		117.873	36.8
342	2404.45	2471.56	1946.59	1751.5	2685.28	1903.31	2458.37	1914.08	2574.61	1628.04	1929.79	3974.79	2249.13																													118.325	34.1		117.209	36.9
343	2401.22	2449.51	1948.56	1748.63	2679.85	1902.05	2434.57	1910.3	2579.13	1624.14	1934.01	3962.01	2245.77																													118.583	34.2		118.349	37
344	2405.79	2456.74	1939.93	1738.51	2687.51	1916.53	2444.71	1913.48	2570.25	1621.04	1940.1	3976.41	2254.7																													118.957	34.3		118.321	37.1
345	2408.16	2456.14	1941.47	1737.82	2677.72	1922.22	2447.11	1896.93	2577.43	1624.7	1926.13	3970.68	2256.1																													118.1	34.4		118.244	37.2
346	2407.97	2449.57	1956.85	1754.79	2659.96	1929.08	2470.34	1886.92	2574.31	1609.76	1912.43	3983.59	2249.97																													117.26	34.5		118.073	37.3
347	2409.46	2462.4	1951.38	1746.49	2670.77	1923.28	2446.75	1888.32	2585.02	1620.32	1923.67	3967.16	2253.37																													117.949	34.6		117.837	37.4
348	2393.92	2457.85	1950.79	1745.95	2662.91	1928.33	2439.25	1889.15	2579.03	1618.44	1930.21	3962.88	2244.82																													118.35	34.7		118.775	37.5
349	2415.28	2457.88	1951.71	1746.97	2677.75	1928.09	2465.86	1890.52	2577.51	1633.72	1923.61	3980.56	2243.41																													117.946	34.8		118.249	37.6
350	2396.17	2439.64	1956.68	1745.17	2662.28	1924.66	2459.2	1892.68	2575.48	1626.29	1935.84	3967.99	2235.74																													118.695	34.9		119.359	37.7
351	2404.98	2459.99	1948.44	1738.82	2677.01	1932.92	2449.93	1900.48	2574.28	1615.43	1923.03	3965.44	2238.91																													117.91	35		118.457	37.8
352	2411.4	2451.97	1950.04	1740.03	2661.69	1907.96	2421.53	1884.32	2583.58	1627.05	1925.23	3965.98	2254.12																													118.045	35.1		117.465	37.9
353	2410.03	2448.1	1962.62	1729.99	2665.85	1916.53	2450.94	1891.54	2584.95	1632.65	1927.08	3963.04	2244.83																													118.158	35.2		118.512	38
354	2401.94	2440.67	1955.97	1741.08	2668.96	1919.28	2445.81	1879.45	2587.16	1625.11	1936.68	3975.62	2244.39																													118.747	35.3		118.842	38.1
355	2406.59	2445.84	1944.54	1736.06	2658.73	1924.35	2454.45	1871.87	2590.47	1624.6	1924.65	3980.1	2236.11																													118.009	35.4		117.804	38.2
356	2404.76	2445.33	1947.39	1742.39	2668.59	1921.14	2440.09	1878.95	2580.96	1626.77	1920.98	3972.25	2245.02																													117.784	35.5		118.613	38.3
357	2400.97	2453.32	1939.59	1728.2	2654.31	1910.48	2445.32	1870.5	2585.32	1619.82	1923.92	3968.7	2233.98																													117.965	35.6		118.282	38.4
358	2394.77	2446.4	1941.4	1729.55	2649.49	1923.02	2437.71	1884.1	2588.17	1624.41	1926.54	3974.44	2238.84																													118.125	35.7		118.225	38.5
359	2412.19	2456.07	1941.3	1736.17	2646.96	1914.46	2444.61	1875.66	2584.26	1621.56	1929.11	3985.73	2244.5																													118.283	35.8		117.471	38.6
360	2400.16	2437.03	1946.34	1742.96	2653.01	1932.22	2451.45	1869.16	2567.5	1620.26	1922.01	3976.35	2228.54																													117.848	35.9		117.925	38.7
361	2386.23	2435.23	1943.32	1728.51	2633.14	1918.87	2437.2	1859.49	2586.97	1629.18	1925.51	3978.71	2234.04																													118.062	36		118.181	38.8
362	2392.35	2448.5	1935.52	1730	2649.22	1911.16	2439.64	1870.36	2580.13	1623.74	1925.73	3964.43	2234.33																													118.076	36.1
363	2406.02	2439.77	1942.7	1728.34	2645.13	1910.83	2444.44	1866.42	2578.43	1637.91	1930.84	3979.35	2221.66																													118.388	36.2
364	2398.83	2428.73	1942.53	1719.66	2664.01	1914.6	2436.12	1872.94	2582.65	1614.77	1929.58	3977.76	2232.54																													118.311	36.3
365	2387.83	2446.21	1939.43	1734.86	2642.67	1919.35	2440.07	1878.69	2571.45	1610.91	1929.42	3976.69	2232.76																													118.301	36.4
366	2399.29	2431.38	1935.28	1726.71	2647.24	1915.54	2428.26	1877.11	2568.92	1614.76	1931.64	3974.71	2222.25																													118.438	36.5
367	2397.76	2443.81	1930.02	1725.34	2653.93	1913.07	2418.85	1866.78	2569.72	1615.42	1932.08	3981.88	2232.19																													118.464	36.6
368	2396.21	2422.92	1935.47	1726.33	2653.69	1911.29	2423.35	1858.27	2574.64	1611.6	1940.06	3961.72	2224.88																													118.954	36.7
369	2390.8	2436.23	1943.93	1721.52	2637.25	1912.5	2421.02	1860.53	2572.08	1611.74	1922.42	3967.36	2228.18																													117.873	36.8
370	2399.37	2438.75	1932.17	1728.66	2643.83	1909.31	2430.29	1867.6	2587.42	1609.78	1911.59	3973.62	2226.6																													117.209	36.9
371	2389.09	2439.46	1944.75	1737.64	2644.14	1913.43	2422.24	1865.67	2574.17	1609.82	1930.19	3973.11	2229.91																													118.349	37
372	2401.72	2434.54	1931.22	1742.73	2639.03	1917.44	2411.87	1860.92	2560	1614.12	1929.73	3973.17	2220.03																													118.321	37.1
373	2384.82	2416.29	1942.23	1726.57	2632.77	1907.2	2416.16	1859.06	2571.42	1615.94	1928.48	3970.18	2229.02																													118.244	37.2
374	2395.75	2418.43	1918.12	1733.12	2639.42	1902.47	2408.78	1843.77	2568.35	1609.23	1925.69	3976.75	2229.32																													118.073	37.3
375	2394.22	2410.94	1936.32	1725.46	2642.2	1921.97	2419.13	1864.74	2571.97	1600.32	1921.83	3977.59	2238.58																													117.837	37.4
376	2400.47	2426.25	1930.87	1723.19	2640.67	1915.09	2409.46	1853.76	2561.91	1607.3	1937.14	3972.59	2221.41																													118.775	37.5
377	2397.9	2438.44	1940.97	1723.17	2637.77	1914.04	2403.08	1860.38	2577.47	1612.63	1928.55	3981.13	2217.4																													118.249	37.6
378	2388.15	2426.82	1929.94	1723.07	2642.41	1918.56	2400.41	1854.29	2577.24	1610.15	1946.66	3972.25	2219.83																													119.359	37.7
379	2393.03	2434.41	1924.64	1719.93	2634.8	1922.04	2415.26	1849.43	2573.75	1609.6	1931.96	3970.09	2216.75																													118.457	37.8
380	2383.05	2426.51	1938.97	1716.8	2626.36	1914.33	2415.81	1841.59	2580.73	1621.7	1915.78	3967.46	2217.65																													117.465	37.9
381	2393.84	2438.01	1931.87	1711.04	2621.93	1914.79	2408.1	1863.08	2577.54	1614.1	1932.85	3967.13	2213.04																													118.512	38
382	2391.52	2425.79	1920.31	1716.04	2629.62	1906.91	2401.96	1854.95	2576.29	1600.7	1938.24	3974.86	2218.24																													118.842	38.1
383	2399.31	2415.81	1921.26	1720.11	2632.3	1911.08	2401.58	1840.71	2575.15	1603.8	1921.3	3979.82	2215.1																													117.804	38.2
384	2394.92	2416.79	1924.03	1716.36	2629.69	1908.78	2403.16	1850.67	2569.98	1613.34	1934.5	3971.37	2223.66																													118.613	38.3
385	2375.05	2432.42	1910.96	1720.61	2632.48	1917.63	2406.83	1858.61	2573.75	1598.71	1929.11	3967.7	2213.36																													118.282	38.4
386	2390.53	2411.73	1900.21	1714.36	2636.6	1914.12	2411.87	1841.8	2585.39	1611.57	1928.16	3981.94	2210.19																													118.225	38.5
387	2392.04	2417.86	1910.47	1716.42	2614.44	1910.76	2405.66	1851.15	2580.21	1604.12	1915.87	3967	2206.78																													117.471	38.6
388	2410.87	2418.87	1911.47	1709.29	2616.62	1903.38	2407.58	1835.17	2576.88	1607.65	1923.28	3973.01	2214.17																													117.925	38.7
389	2375.4	2407.45	1920	1707.36	2624.41	1907.03	2406.27	1839.92	2574.71	1600.57	1927.45	3974.22	2209.24																													118.181	38.8

## Sheet: average
1	2	3	4	5	6	7	8	9	10	11	12	13		1	2	3	4	5	6	7	8	9	10	11	12	13		13
2065.61	2335.62	1707.13	1568.1	2622.76	1597.6	2421.52	1626.16	2190.28	1617.3	1630.93	3344.69	2211.54		100	100	100	100	100	100	100	100	100	100	100	100	100		100	5.57396e-15	1
2058.97	2349.25	1708.9	1581.39	2614.54	1593.76	2400.65	1629.16	2192.51	1616.19	1629.98	3336.45	2203.75		99.6784	100.583	100.103	100.847	99.6868	99.7596	99.1382	100.184	100.102	99.9315	99.9417	99.7537	99.6477		99.9506	0.418453	2
2065.73	2332.61	1695.56	1568.57	2618.6	1603.51	2416.52	1641.7	2197.07	1599.51	1642.55	3336.57	2202.31		100.006	99.8711	99.3223	100.03	99.8416	100.369	99.7936	100.955	100.31	98.9002	100.712	99.7572	99.5829		99.9579	0.527465	3
2064.94	2344.62	1687.48	1569.98	2618.19	1614.18	2427.36	1624.56	2204.95	1602.48	1634.52	3340.11	2210.16		99.9675	100.385	98.8488	100.12	99.8257	101.038	100.241	99.9015	100.67	99.0837	100.22	99.8632	99.9378		100.008	0.556264	4
2061.76	2348.61	1700.38	1573.32	2609.31	1600.63	2400.18	1645.11	2195.41	1611.75	1625.46	3350.98	2201.86		99.8132	100.556	99.6045	100.333	99.4872	100.189	99.1188	101.165	100.234	99.6574	99.6644	100.188	99.5622		99.9672	0.521986	5
2069.88	2328.92	1714.88	1578.24	2630.52	1606.41	2427.87	1643.42	2173.02	1612.94	1638.22	3333.62	2219.28		100.207	99.7131	100.454	100.646	100.296	100.551	100.262	101.062	99.212	99.7308	100.447	99.6691	100.35		100.2	0.475683	6
2061.73	2342.04	1705.99	1562.25	2616.86	1605.44	2406.94	1634.38	2185.61	1628.32	1629.02	3347.3	2217.93		99.8118	100.275	99.933	99.6267	99.7753	100.49	99.3981	100.506	99.7867	100.681	99.8825	100.078	100.289		100.041	0.36743	7
2075.84	2334.08	1717.2	1572.6	2613.96	1604.66	2410.08	1641.94	2187.39	1621.78	1638.97	3342.53	2208.59		100.495	99.934	100.59	100.287	99.6646	100.442	99.5276	100.971	99.8679	100.277	100.493	99.9354	99.8669		100.181	0.400615	8
2059.38	2338.65	1702.03	1569.8	2603.73	1591.27	2417.21	1628.37	2179.97	1618.02	1642.72	3345.04	2196.69		99.6983	100.129	99.7014	100.109	99.2746	99.6033	99.8221	100.136	99.5291	100.045	100.723	100.011	99.3287		99.8546	0.37875	9
2069.05	2334.43	1694.07	1573.52	2615.9	1597.83	2417.95	1637.49	2188.23	1623.9	1634.65	3344.77	2192.05		100.166	99.949	99.2348	100.345	99.7386	100.014	99.8525	100.697	99.9063	100.408	100.228	100.002	99.1188		99.974	0.421239	10
2064.42	2332.14	1705.18	1573.01	2607.8	1601.45	2419.71	1630.03	2202.19	1622.5	1632.96	3345.68	2211.67		99.942	99.8509	99.8855	100.313	99.4298	100.24	99.9252	100.238	100.544	100.322	100.124	100.03	100.006		100.065	0.269176	11
2070.56	2338.96	1697.55	1573.99	2632.99	1605.78	2419.71	1631.1	2192.36	1609.8	1639.58	3353.45	2210.37		100.239	100.143	99.4385	100.376	100.39	100.512	99.9251	100.304	100.095	99.5363	100.53	100.262	99.9472		100.131	0.32826	12
2071.67	2324.48	1693.66	1566.28	2621.41	1595.05	2433.76	1627.83	2201.94	1616.74	1640.67	3348.19	2210.12		100.293	99.5231	99.2106	99.8842	99.9486	99.8399	100.505	100.103	100.532	99.9656	100.597	100.105	99.9357		100.034	0.380859	13
2069.8	2328.95	1700.73	1570.68	2626.03	1599.64	2426.6	1642.92	2184.45	1618.94	1637.68	3353.65	2223.99		100.202	99.7142	99.6247	100.164	100.125	100.127	100.21	101.031	99.734	100.102	100.414	100.268	100.563		100.175	0.358504	14
2075.62	2332.52	1704.67	1583.29	2624.89	1593.1	2430.33	1628.59	2197.54	1623.16	1634.28	3349.26	2217.4		100.484	99.8672	99.8557	100.969	100.081	99.7183	100.364	100.149	100.332	100.363	100.206	100.137	100.265		100.215	0.307019	15
	2367.45									1624.92					101.363									99.6316				100.497	0.865621	16
																														17
																														18
	2387.76						1630.73			1681.77					102.232						100.281			103.117				101.877	1.18464	19
2119.87		1731.47					1634.85		1644.22	1667.54	3394.64			102.627		101.426					100.535		101.665	102.245	101.494			101.665	0.661438	20
2109.18		1750.12		2639.92	1623.11			2187.03	1642.13	1670.42	3369.24			102.109		102.518		100.654	101.597			99.8514	101.536	102.421	100.734			101.428	0.883439	21
2116.61	2358.56	1743.71	1610		1624.11	2470.38	1657.35			1616.95	3428.99	2232.43		102.469	100.982	102.143	102.672		101.659	102.018	101.918			99.1424	102.52	100.945		101.647	1.00765	22
2111.78		1682.44	1601.06		1622.69	2442.31	1668.18		1639.77	1656.72	3421.61	2225.43		102.235		98.5536	102.102		101.57	100.858	102.584		101.39	101.581	102.3	100.628		101.38	1.11581	23
	2313.53	1727.76	1611.05	2642.07				2211.23	1652.22	1663.71	3404.43	2238.68			99.0542	101.208	102.739	100.736				100.956	102.16	102.01	101.786	101.227		101.32	1.00217	24
2106.18			1601.94											101.964			102.158											102.061	0.097225	25
		1732.31		2638.71				2215.02		1669.76	3390.76					101.475		100.608				101.129		102.381	101.377			101.394	0.577483	26
2142.83	2341.77	1734.57		2641.16		2445.39	1649.84	2204.41		1657.94		2219.7		103.738	100.263	101.608		100.702		100.986	101.457	100.645		101.656		100.369		101.269	1.00045	27
																				0										28
						2458.54														101.529								101.529	0	29
2144.72	2386.72	1703.5					1670.51		1629.63	1634.13				103.83	102.188	99.7871					102.727		100.763	100.196				101.582	1.44598	30
2133.62	2352.54	1717.68	1609.58		1618.73	2475.43	1659.27	2233.88	1647.24	1667.54	3411.68			103.292	100.724	100.618	102.645		101.322	102.226	102.036	101.991	101.852	102.245	102.003			101.905	0.745815	31
	2291.17	1752.03			1628.56	2472.79	1649.59	2238.54	1645.65	1667.98	3399.27				98.0966	102.63			101.938	102.117	101.441	102.203	101.753	102.272	101.632			101.565	1.27238	32
								2181.59														99.603								33
2123.69		1746.47	1617.23	2659.11	1606.77	2476.92	1652.23	2240.33	1651.7	1649.15	3398.82			102.811		102.305	103.133	101.386	100.574	102.288	101.603	102.285	102.127	101.117	101.618			101.932	0.71717	34
2129.56		1740.02	1616.18	2657.79		2466.96	1644.8	2233.73	1638.55	1644.08	3408.35			103.096		101.926	103.066	101.336	0	101.877	101.146	101.984	101.314	100.806	101.903
2148.62		1730.17	1611.73	2661.6	1620.44		1653.28	2234.36	1654.21	1650.04	3398.31			104.018		101.35	102.783	101.481	101.429		101.668	102.013	102.282	101.172	101.603			101.98	0.820562	36
2168.69														104.99																37
2130.73					1607.52	2475.75		2222.03						103.152					100.621	102.239		101.449						101.865	0.93781	38
																														39
2146		1758.16	1607.25	2650.22	1641.38	2472.03		2239.97		1663.75				103.892		102.989	102.497	101.047	102.74	102.086		102.269		102.012				102.441	0.772964	40
2118.71		1756.02	1614.07	2655.1	1617.53	2455.81		2252.41	1632.74	1652.64		2259.19		102.57		102.864	102.932	101.233	101.247	101.416		102.837	100.955	101.331		102.155		101.954	0.753469	41
2114.36		1746.14	1614.6	2641.54	1631.23	2474.38		2233.95	1638.05	1631.36		2252.54		102.36		102.285	102.965	100.716	102.105	102.183		101.994	101.283	100.026		101.854		101.777	0.822753	42
2116.94		1747.71	1614.62	2661.62	1623	2463.2		2245.96	1637.82	1662.56		2261.55		102.485		102.377	102.967	101.482	101.59	101.721		102.542	101.269	101.94		102.261		102.063	0.518266	43
		1722.38	1620.31					2183.04		1613.29						100.893	103.33					99.6697		98.9182						44
2113.93	2291.13	1752.61	1626.76		1628.21	2469.43		2235.88	1638.33	1653.15				102.339	98.0951	102.664	103.741		101.916	101.979		102.082	101.3	101.362				101.72	1.45446	45
																														46
2128.32	2400.95	1701.27	1604.04			2466.78		2214.73		1647.99				103.036	102.797	99.6564	102.292			101.869		101.116		101.046				101.687	1.08955	47
2114.78	2349.76	1746.02	1621.14		1624.15	2467.91		2237.32	1645.12	1664.13				102.38	100.605	102.278	103.383		101.662	101.916		102.148	101.72	102.035				102.014	0.691253	48
2120.53	2363.74	1743.27	1617.61		1613.84	2477.55	1685.01	2237.61	1644.34	1657.44				102.659	101.204	102.117	103.157		101.016	102.314	103.619	102.161	101.672	101.625				102.154	0.783875	49
2136.21	2366.1	1731.33	1603.17		1626.61	2469.52	1653.83	2233.48	1641.05					103.418	101.305	101.417	102.237		101.815	101.982	101.702	101.972	101.469					101.924	0.600249	50
2122.32	2376.93	1754.2	1620.82		1627.61	2470.79	1652.34	2242.04	1639.79					102.745	101.769	102.757	103.362		101.878	102.035	101.61	102.363	101.391					102.212	0.605874	51
2113.94	2366.72	1731.56	1608.43		1620	2468.17	1645.44	2237.14	1652.02	1660.57				102.34	101.331	101.431	102.572		101.402	101.926	101.186	102.14	102.147	101.817				101.829	0.449743	52
2116.45	2377.56	1732.01	1613.52		1618.88	2473.72	1640.59	2244.76	1645.11	1649.16				102.461	101.796	101.457	102.896		101.332	102.156	100.887	102.487	101.72	101.117				101.831	0.622156	53
2126.5	2376.85	1729.86	1618.59		1631.58	2479.28	1663.89	2240.16	1650.08	1668.79				102.947	101.765	101.331	103.22		102.127	102.385	102.32	102.277	102.027	102.321				102.272	0.509446	54
2116.46	2360.29	1720.25	1631.34		1632.11	2471.57	1655.61	2247.81	1646.51	1658.45				102.461	101.056	100.769	104.033		102.16	102.067	101.811	102.627	101.806	101.687				102.048	0.855866	55
2113.03	2376.67	1730.78	1626.22		1629.83	2484.37	1650.69	2246.64	1647.22	1669.23				102.295	101.757	101.385	103.706		102.017	102.596	101.509	102.573	101.851	102.348				102.204	0.639437	56
2111.5	2366.92	1743.67	1610.74		1624.09	2473.43	1656.54	2238.15	1647.94	1652.19				102.221	101.34	102.14	102.719		101.658	102.144	101.868	102.186	101.895	101.304				101.947	0.409855	57
2116.22	2368.74	1739.77	1621.04		1612.6	2463.57	1651.35	2237.34	1647.1	1655.77				102.45	101.418	101.912	103.376		100.938	101.737	101.549	102.148	101.843	101.523				101.889	0.631943	58
2127.62	2360.15	1749.36	1610.77		1622.63	2472.37	1652.54	2242.24	1647.49	1666.49				103.002	101.05	102.474	102.721		101.567	102.1	101.622	102.372	101.867	102.18				102.095	0.555752	59
2121.79	2371.64	1739.01	1621.87		1624.25	2468.66	1661.34	2235.72	1651.56	1657.23				102.719	101.542	101.868	103.429		101.668	101.947	102.164	102.074	102.119	101.613				102.114	0.544628	60
	2359.45	1738.88			1642.8			2240.26	1636.38	1638.59					101.02	101.859			102.829	0	0	102.282	101.18	100.47						61
2105.44	2459.54	1738.74	1618.11		1632.43	2479.62	1655.1	2226.41	1647.67	1649.17				101.928	105.306	101.851	103.189		102.18	102.399	101.78	101.65	101.878	101.118				102.328	1.11572	62
2154.7		1760.05	1615.2		1630.86	2501.92	1653.38	2275.95	1663.76	1675.28				104.313		103.1	103.004		102.082	103.32	101.674	103.911	102.873	102.719				103	0.771923	63
																														64
																														65
	2457.09			2646.32						1672.32	3359.41				105.201			100.898						102.537	100.44			102.269	1.86346	66
2078.44	2447.06	1754.53		2668.4		2472.5			1646.5	1644.25	3358.99	2186.66		100.621	104.771	102.777		101.74		102.105			101.806	100.817	100.428	98.8752				67
2069.28		1735.09					1638.38		1629.43	1635.49	3423.51	2257.93		100.177		101.638					100.752		100.751	100.28	102.357	102.098				68
2128.92	2349.52			2660.93	1618.45				1667.72		3412.96			103.064	100.595			101.455	101.305				103.118		102.041			101.93	0.922779	69
2115.3	2303.31	1754.33	1628.74		1659.55		1620.99				3435.33	2219.53		102.405	98.6164	102.765	103.867		103.877		99.6824				102.71	100.361				70
			1619.79														103.296											103.296		71
2100.16			1609.4					2282.37		1653.4				101.672			102.634					104.204		101.378				102.472	1.10281	72
2102.6	2379.26		1631.73			2546.22					3360.01	2245.68		101.791	101.868		104.058			105.15					100.458	101.544		102.478	1.6037	73
							1673.95	2253.99													102.939	102.909						102.924	0.015126	74
				2648.44		2527.04												100.979		104.357								102.668	1.68913	75
2114.14				2686.29										102.349				102.422										102.386	0.03656	76
2089.61		1749.4					1654.01	2263.54			3359.45	2176.33		101.161		102.476					101.713	103.345			100.441	98.4082				77
				2681.73				2285.78	1655.88		3328.11							102.249				104.36	102.386	0	99.5044					78
2159.26			1642.98	2712.44		2482.6		2322.44		1653.87				104.533			104.775	103.419		102.522		106.034		101.407				103.782	1.52659	79
2068.67		1759.94	1639.96	2682.78		2544.54			1693.39					100.148		103.094	104.583	102.288		105.08			104.705					103.316	1.72194	80
	2337.99	1759.37		2693.46		2528.71	1656.86	2278.3	1667	1665.13		2217.57			100.101	103.06		102.696		104.426	101.888	104.018	103.073	102.097		100.273		102.404	1.40893	81
	2303.58	1745.16		2712.25	1648.85	2576.89	1777.78	2270.31	1701.28			2216.06			98.628	102.228		103.412	103.208	106.416	109.324	103.654	105.193			100.204		103.585	3.01029	82
2085.52	2355.83	1755.72	1632.93	2719.95	1659.83	2512.57	1628.65	2300.1	1687.77	1662.38		2224.47		100.964	100.865	102.846	104.134	103.706	103.895	103.76	100.153	105.014	104.358	101.928		100.585		102.684	1.6248	83
2077.44	2349.07	1776.99	1643.53	2745.14	1678.88	2536.58	1670	2300.31	1710.5	1667.91	3445.69	2237.88		100.573	100.576	104.092	104.81	104.666	105.088	104.751	102.696	105.024	105.763	102.267	103.02	101.191		103.424	1.74822	84
2058.21		1774.39		2768.83	1678.87	2530.68	1693.99	2379.88	1715.38	1669.83	3474.91	2291.37		99.6414		103.94		105.569	105.087	104.508	104.171	108.656	106.065	102.385	103.893	103.61		104.321	2.14302	85
2093.96	2394.31	1797.09	1684.68	2768.37	1685.4	2545.57	1678.73	2331.89	1729.74	1692.63	3499.61			101.372	102.513	105.27	107.434	105.552	105.495	105.123	103.233	106.465	106.952	103.783	104.632			104.819	1.73727	86
2210.72	2402.6	1807.39	1691.12		1696.49	2496.29	1703.63	2333.14	1752.31	1706.28	3522.79	2315.01		107.025	102.868	105.873	107.845	0	106.19	103.088	104.764	106.522	108.348	104.62	105.325	104.679
	2425.84	1782.74	1688.76	2792.94	1707.99	2594.35	1718.71	2355.44	1757.64	1712.75	3559.31	2337.04			103.863	104.429	107.695	106.489	106.909	107.137	105.692	107.541	108.678	105.017	106.417	105.675		106.295	1.35732	88
	2433.94		1699.13	2810.39	1716.14	2606.83	1728.97	2365.28		1726.75	3611.83	2335.65			104.209		108.356	107.154	107.419	107.653	106.322	107.99		105.875	107.987	105.612		106.858	1.25128	89
2151.23	2461.26	1834.38		2826.41	1714.56	2622.96		2410.73	1761.35	1729.35	3614.74	2359.98		104.145	105.379	107.454		107.765	107.321	108.319		110.065	108.907	106.034	108.074	106.712		107.289	1.58675	90
2200.94	2477.66	1852.86	1729.12	2846.52	1752.41	2658.88	1917.88	2409.8	1798.16		3625.91	2188.17		106.551	106.081	108.536	110.269	108.532	109.69	109.802	117.939	110.022	111.183		108.408	98.9432		108.83	4.12855	91
2182.86		1848.61	1693.4	2846.67	1749.58	2647.4	1929.97	2403.44	1783.57	1744.08	3632.51	2389.84		105.676	0	108.288	107.991	108.537	109.512	109.328	118.683	109.732	110.281	106.937	108.605	108.062
2209.64		1860.57	1749.31	2857.24	1741.36	2645.12	1943.17	2421.64	1800.89	1757.69	3668.77	2430		106.972	0	108.988	111.556	108.94	108.998	109.234	119.495	110.563	111.352	107.772	109.689	109.878
2219.75	2525.91	1866.68	1750.41	2828.25	1753.65	2671.35	1958.05		1806.17	1758.05	3684.66	2427.45		107.462	108.147	109.346	111.626	107.835	109.767	110.317	120.41		111.678	107.794	110.165	109.763		110.359	3.32124	94
	2545.16	1885.77	1707.83				1968.68	2451.32	1807.55	1766.38	3689.71	2430.82			108.972	110.464	108.911				121.063	111.918	111.764	108.305	110.316	109.915		111.292	3.64533	95
2247.7	2544.93		1751.86	2908.69	1782.85	2708.09	1971.9		1821.62	1780.73	3719.01	2433.01		108.815	108.961		111.719	110.902	111.595	111.834	121.261		112.634	109.185	111.191	110.014		111.647	3.27759	96
2245.18	2563.92	1930.69	1775.01	2929.48		2716.31	1982.47	2448.29	1814.93	1790.73	3727.46	2456.69		108.693	109.774	113.096	113.195	111.695		112.174	121.911	111.78	112.22	109.798	111.444	111.085		112.239	3.19218	97
2247.18	2584.97	1920.15	1795.47	2931.24	1792.66	2719.7	1992.69	2488.4	1844.84	1786.18	3741.79	2464.34		108.79	110.676	112.478	114.499	111.762	112.21	112.314	122.54	113.611	114.069	109.519	111.872	111.431		112.752	3.23265	98
2276.34	2575.78	1913.39	1743.53	2946.89	1812.78	2739.37	1994.48	2484.33	1840.37	1801.36	3766.47	2477.57		110.202	110.282	112.082	111.187	112.358	113.468	113.126	122.65	113.425	113.793	110.449	112.61	112.029		112.897	3.05571	99
2261.21	2583.81	1922.97	1793.31	2938.82	1807.78	2748.89	1998.87	2500.55	1859.71	1795.89	3785.75	2488.78		109.469	110.626	112.644	114.362	112.051	113.156	113.519	122.92	114.166	114.989	110.115	113.187	112.536		113.365	3.18469	100
2294.7	2596.71	1921.25	1767.81	2987.32	1810.05	2744.6	2013.14	2511.55	1853.9	1810.77	3785.5	2433.51		111.09	111.178	112.542	112.736	113.9	113.298	113.342	123.797	114.668	114.63	111.027	113.179	110.037		113.494	3.27943	101
2289.29	2609.82	1925.7	1797.58	2981.14	1817.86	2762.29	2020.64	2510.91	1860.88	1814.66	3797.92	2509.26		110.829	111.74	112.803	114.634	113.664	113.787	114.072	124.259	114.639	115.061	111.265	113.551	113.462		114.136	3.18249	102
2317.93	2618.39	1952.39	1797.37	3014.19	1818.64	2759.5	2027.1	2515.64	1864.45	1808.36	3812.5			112.215	112.107	114.367	114.621	114.924	113.836	113.957	124.656	114.855	115.282	110.879	113.987			114.64	3.27762	103
2342.3	2625.48	1942.73	1805.08	2998.9		2702.26	2039.98	2525.85	1864.07	1811.35	3831.23	2491		113.395	112.41	113.801	115.113	114.341		111.593	125.448	115.321	115.258	111.062	114.547	112.637		114.577	3.55033	104
2273.6	2639.98	1956.16	1791.22	2973.84	1829.35	2782.95	2030.88	2518.59	1868.08	1823.31	3831.16	2522.38		110.069	113.031	114.588	114.229	113.386	114.506	114.926	124.888	114.989	115.507	111.796	114.545	114.055		114.655	3.27769	105
2332.76	2632.18	1950.29	1797.34	2985.79	1837.78	2794.07	2035.87	2538.56	1868.47	1832.74	3847.49	2525.84		112.933	112.697	114.244	114.619	113.842	115.034	115.385	125.195	115.901	115.531	112.374	115.033	114.212		115.154	3.08875	106
2330.92	2638.81	1958.03	1792.48	2995.42	1839.6	2791.99	2042.85	2539.73	1880.27	1845.04	3858.92	2544.84		112.844	112.981	114.697	114.309	114.209	115.147	115.299	125.624	115.955	116.26	113.128	115.374	115.071		115.454	3.11787	107
2356.38	2651.35	1971.26	1789.84	2994.98	1855.75	2798.53	2039.6	2541.96			3869	2544.27		114.077	113.518	115.472	114.14	114.192	116.158	115.569	125.424	116.056			115.676	115.045		115.939	3.11708	108
2356.59	2650.46	1951.74	1801.71	3014.8	1863.74	2816.27	2057.79	2517.83	1892.54	1844.1	3863.45	2534.05		114.087	113.48	114.329	114.898	114.948	116.658	116.302	126.543	114.955	117.019	113.07	115.51	114.583		115.875	3.27652	109
2334.96		1960.98	1755.97		1851.92	2799.88	2058.88	2557.68	1886.96	1845.22	3879.37	2545.1		113.039		114.87	111.98		115.919	115.625	126.61	116.774	116.674	113.139	115.986	115.083		115.973	3.68037	110
2360.55	2651.56	1967.66	1818.45	3011.82	1874.31	2835.86	2064.78	2554.83	1891.01		3885.72	2566.79		114.278	113.527	115.261	115.965	114.834	117.32	117.111	126.973	116.644	116.924		116.176	116.064		116.756	3.27624	111
2353.68	2649.16		1819.47	3018.56			2052.6	2544.6	1873.19	1858.9		2571.61		113.946	113.424		116.03	115.091			126.224	116.177	115.822	113.978		116.282		116.33	3.6432	112
2363.5		1975.16		3023.87	1863.96	2825.53	2076.15		1883.95	1869.94	3897.29	2587.97		114.421		115.701		115.293	116.672	116.684	127.672		116.488	114.655	116.522	117.021		117.113	3.62236	113
2368.57	2670.86	1977.01	1838.55	3028.99		2840.52	2068.79	2570.79		1872.81	3898.5	2569.27		114.667	114.353	115.809	117.247	115.489	0	117.303	127.22	117.373		114.831	116.558	116.176
2382.87	2683.89	1984.19	1821.69	3044.89	1870.09	2836.28	2080.94		1895.92	1870.02	3935.85	2572.76		115.359	114.911	116.229	116.172	116.095	117.056	117.128	127.967		117.228	114.659	117.674	116.333		117.234	3.35676	115
2374.4		1976.73	1809.73		1865.88	2852.36	2068.49		1888.07	1870.86	3919.47	2591.67		114.949		115.793	115.409	0	116.792	117.792	127.201		116.742	114.711	117.185	117.189
2391.94	2673.21	1995.79		3046.2		2847.31	2076.02	2571.91	1900.63	1875.68	3922.67			115.798	114.454	116.909		116.145		117.584	127.664	117.424	117.519	115.006	117.28	0
2395.29	2688.56	1982.92	1806.29	3042.12	1875.01	2840.99	2077.76	2572.09	1896.79	1889.34	3941.41	2584.96		115.96	115.111	116.155	115.19	115.989	117.364	117.323	127.771	117.432	117.282	115.844	117.841	116.885		117.396	3.11577	118
2428.28	2681.99	1979.27	1834.33	3051.61	1879.92	2838.21	2076.22	2570.04	1919.51	1893.18		2581.19		117.557	114.83	115.941	116.978	116.351	117.671	117.208	127.676	117.338	118.686	116.08	0	116.715
2399.41	2678.84	1994.74	1832	3054.25	1876.06	2837.04	2074.98	2579.36	1890.77	1874.31	3929.91	2589.94		116.16	114.695	116.847	116.83	116.452	117.43	117.159	127.6	117.764	116.909	114.923	117.497	117.11		117.49	3.05067	120
2414.01	2686.01	1976.47	1817.03	3052.09	1877.21	2837.06	2076.86	2582.97	1907.25	1888.91	3943.45	2612.98		116.866	115.002	115.777	115.875	116.369	117.501	117.16	127.716	117.929	117.929	115.818	117.902	118.152		117.692	3.05477	121
2413.47	2669.88	1992.55	1816.91	3062.48	1880.15	2838.25		2585.37	1898.22	1891	3940.94	2599.76		116.84	114.311	116.719	115.867	116.766	117.686	117.209		118.038	117.37	115.946	117.827	117.555				122
2394.43	2676.84	1992.81		3068.3	1890.37	2838.47	2103.49	2589.25	1923.24	1898.17	3924.17	2603.6		115.919	114.609	116.735		116.988	118.325	117.218	129.354	118.216	118.917	116.386	117.325	117.728		118.143	3.5573	123
2450	2706.2	1994.04	1835.28	3064.14	1870.19	2843.47	2065.95	2589.88	1903.04	1890.88	3936.12	2605.84		118.609	115.866	116.806	117.039	116.829	117.062	117.425	127.045	118.244	117.668	115.938	117.683	117.83		118.003	2.72049	124
2425.24	2686.79		1840.37	3079.14	1885.62	2845.84	2079.83	2581.98	1908.33	1895.5	3957.72	2617.69		117.41	115.035	0	117.363	117.401	118.028	117.523	127.899	117.883	117.995	116.222	118.329	118.365
2425.54	2677.82	2009.72	1822.61	3060.91	1899.21	2842.27		2593.18	1899.51	1901.43	3952.65	2609.12		117.424	114.651	117.725	116.23	116.706	118.879	117.376		118.395	117.45	116.585	118.177	117.977				126
	2688.2	1993.02	1829.56	3069.13	1893.07	2845.59		2586.12	1914.95	1892.67	3965.27	2612.91			115.096	116.747	116.674	117.019	118.494	117.513		118.073	118.405	116.048	118.554	118.149				127
2388.47	2686.44	2003.09	1832.91	3060.88	1897.11	2846.8		2584.26	1908.28	1913.19	3967.57	2619.74		115.63	115.02	117.336	116.888	116.705	118.747	117.562		117.988	117.992	117.307	118.623	118.458				128
2432.23	2705.28	1992.04	1827.01	3060.66	1898.63	2844.33		2589.27	1906.07	1904.65	3969.33	2619.07		117.748	115.827	116.689	116.511	116.696	118.843	117.461		118.216	117.855	116.783	118.676	118.427				129
2420.15	2681.58	2008.45	1835.87	3074.91	1889.82	2849.76	2087.99	2585.08	1909.88	1917.91	3965.64	2618.9		117.164	114.812	117.651	117.076	117.24	118.291	117.685	128.4	118.025	118.091	117.596	118.565	118.42		118.386	3.03191	130
2420.66	2693.57	2002.35	1847.02	3057.87	1894	2844.58	2089.85			1912.74	3977.65	2608.98		117.188	115.326	117.293	117.787	116.59	118.552	117.471	128.514			117.279	118.924	117.971		118.445	3.31221	131
2431.31	2676.42	2004.48	1845.24	3077.14	1905.72	2855.58	2082.35	2615.35	1914.79	1889.44	3978.62	2619.31		117.704	114.591	117.418	117.674	117.325	119.286	117.925	128.053	119.407	118.395	115.85	118.953	118.439		118.54	3.0307	132
2433.79	2680.57	2006.67	1849.88	3071.29	1911.08	2853.45	2076.33	2598.15	1919.13	1896.12	3985.88	2600.27		117.824	114.769	117.546	117.97	117.102	119.621	117.837	127.683	118.622	118.663	116.26	119.171	117.577		118.511	2.90766	133
2439.32	2698.11	2007.56	1832.85	3076.95	1892.55	2859.79	2082.03	2604.82	1909.27	1911.75	3977.6	2620.03		118.092	115.52	117.599	116.883	117.317	118.462	118.099	128.034	118.926	118.053	117.218	118.923	118.471		118.584	2.86946	134
2434.55	2696.59	2002.76	1825.08	3078.2	1912.39	2837.46	2077.46	2597.99	1900.72	1908.29	3984.72	2613.09		117.861	115.455	117.317	116.388	117.365	119.704	117.177	127.753	118.614	117.525	117.006	119.136	118.157		118.42	2.89933	135
2431.28	2685.94	2008.02	1844.69	3067.3	1899.55	2842.72	2069.67	2591.57	1910.58	1908.93	3986.2	2622.43		117.702	114.999	117.625	117.639	116.949	118.9	117.394	127.273	118.321	118.134	117.045	119.18	118.58		118.442	2.74377	136
2424.45	2698.92	2006.14	1850.33	3076.51	1900.49	2855.16	2075.66	2602.86	1913.73	1920.43	3990.66			117.372	115.555	117.516	117.998	117.3	118.959	117.908	127.642	118.837	118.329	117.751	119.313			118.707	2.85184	137
2431.89	2700.45	1999.73	1827.38	3071.08	1915.08	2847.59	2073.49	2613.21	1911.29	1911.04	3982.13	2614.02		117.732	115.62	117.14	116.535	117.094	119.872	117.595	127.508	119.309	118.178	117.174	119.058	118.199		118.54	2.81924	138
2437.97	2707.47	1994.03	1838.75	3079.62	1914.01	2853.71	2082.84	2612.83	1900.14	1909.36	3987.28	2608.82		118.026	115.92	116.806	117.26	117.419	119.805	117.848	128.083	119.292	117.489	117.072	119.212	117.964		118.631	2.91795	139
2433		1997.48	1835.41	3081.82	1910.11	2848.87	2083.77	2595.06	1899.7	1916.84	3985.42	2605.54		117.786		117.008	117.047	117.503	119.561	117.648	128.141	118.481	117.462	117.53	119.157	117.816		118.762	2.92597	140
2437.17	2677.74	2016.98	1831.9	3082.89	1906.2	2844.57	2075.12	2586.49	1898.87	1925.83	3977.01	2611.14		117.987	114.648	118.15	116.823	117.544	119.316	117.47	127.609	118.09	117.411	118.081	118.905	118.069		118.469	2.84896	141
2444.13	2685.5	2011.36	1848.13	3078.24	1917.66	2847.02	2068.35	2611.1	1893.99	1917.12	3985.97	2607.52		118.324	114.98	117.821	117.858	117.366	120.033	117.572	127.193	119.213	117.108	117.548	119.173	117.905		118.623	2.73606	142
2427.02	2691.84	1989.62	1845.57	3077.24	1912.49	2862.13	2073.38	2608.04	1893.95	1938.48	3986.87	2611.8		117.496	115.252	116.548	117.695	117.328	119.71	118.196	127.502	119.073	117.106	118.857	119.2	118.099		118.62	2.8126	143
2427.52	2684.09	2009.51	1842.51	3082.49	1912.27	2843.98	2081.37	2600.28	1883.08	1927.68	3992.37	2609.78		117.521	114.92	117.712	117.499	117.528	119.696	117.446	127.993	118.719	116.434	118.195	119.364	118.007		118.541	2.96628	144
2435.47	2684.76	2010.65	1838.29	3078.52	1900.51	2836.95	2061.71	2597.85	1902.22	1927	3992.3	2604.09		117.905	114.948	117.78	117.23	117.377	118.96	117.156	126.784	118.608	117.617	118.153	119.362	117.75		118.433	2.61884	145
2446.5	2694.88	2014.95	1845.52	3075.7	1916.73	2842.51	2058.66	2610.23	1900.18	1926.08	3989.08	2605.82		118.439	115.382	118.031	117.691	117.27	119.975	117.385	126.597	119.173	117.491	118.097	119.266	117.828		118.664	2.53309	146
2446.33	2691.83	2005.42	1839.1	3073.01	1922.48	2837.99	2065.32	2588.82	1883.71	1930.12	3987.95	2605.72		118.431	115.251	117.473	117.282	117.167	120.335	117.199	127.006	118.196	116.473	118.345	119.232	117.824		118.478	2.73866	147
2447.79	2689.13	2017.44	1832.45	3070.38	1914.55	2849.84	2073.88	2617.76	1891.29	1932.17	3985.24	2605.73		118.502	115.135	118.177	116.858	117.067	119.839	117.688	127.533	119.517	116.941	118.47	119.151	117.824		118.669	2.83099	148
2429.63	2706.68	2021.55	1841.51	3059.9	1927.46	2848.41	2063.61	2606.71	1879.53	1932.96	3993.65	2604.48		117.623	115.887	118.418	117.436	116.667	120.647	117.629	126.901	119.012	116.214	118.518	119.403	117.768		118.625	2.69874	149
2435.73	2692.11	2021.78	1842.49	3053.18	1905.02	2810.29	2062.78	2599.81	1888.89	1930.38	3987.47	2599.86		117.918	115.263	118.431	117.498	116.411	119.242	116.055	126.85	118.698	116.793	118.361	119.218	117.559		118.331	2.72368	150
2438.31	2686.42	2005.7	1830.91	3063.63	1922.28	2836.44	2056.67	2601.57	1887.91	1930.41	3983.02	2603.57		118.043	115.019	117.49	116.76	116.81	120.323	117.135	126.474	118.778	116.732	118.363	119.085	117.727		118.364	2.65919	151
2435.82	2691.83	2009.57	1822	3066.27	1923.61	2827.17	2068.71	2610.35	1879.42	1938.5	3981.51	2596.8		117.922	115.251	117.716	116.192	116.91	120.406	116.752	127.214	119.179	116.208	118.858	119.04	117.42		118.39	2.89739	152
2440.3	2696.67	2016.73	1839.85	3060.38	1912.61	2825.89	2065.04	2614	1889.15	1931.96	3983.92	2594.3		118.139	115.458	118.135	117.33	116.686	119.717	116.699	126.989	119.346	116.809	118.458	119.112	117.307		118.476	2.72216	153
2439.47	2701.73	2015.52	1839.15	3060.81	1917.07	2809.49	2059.98	2594.08	1884.43	1943.8	3987.9	2593.69		118.099	115.675	118.065	117.286	116.702	119.996	116.022	126.678	118.436	116.517	119.184	119.231	117.28		118.398	2.69734	154
2447.85	2685.24	2011.45	1842.33	3054.91	1917.71	2816.94	2063.98	2595.19	1892.01	1934.06	3984.26	2585.1		118.504	114.969	117.826	117.488	116.477	120.037	116.329	126.924	118.487	116.986	118.586	119.122	116.892		118.356	2.78844	155
2440.16	2682.23	2020.24	1843.11	3065.71	1922.25	2821.9	2054.05	2600.85	1879.48	1935.71	3992.75	2590.76		118.132	114.84	118.341	117.538	116.889	120.321	116.534	126.313	118.745	116.211	118.687	119.376	117.147		118.39	2.6758	156
2458.7	2691.56	2012.64	1846.13	3051.68	1924.69	2812.76	2060.03	2606.55	1871.97	1939.29		2589.21		119.03	115.24	117.896	117.73	116.354	120.473	116.157	126.681	119.005	115.747	118.907	0	117.077				157
2449.99	2690.79	2021.31	1825.49	3051.85	1911.49	2819.23	2062.27	2609.6	1890.93	1936.41	4002.73	2591.72		118.608	115.207	118.404	116.414	116.36	119.648	116.424	126.818	119.145	116.919	118.73	119.674	117.191		118.426	2.78191	158
2434.78	2685.08	2009.91	1839.06	3056.17	1913.5	2821.88	2065.86	2600.73	1864.44	1929.75	3990.96	2589.47		117.872	114.962	117.736	117.279	116.525	119.773	116.533	127.039	118.739	115.281	118.322	119.322	117.089		118.19	2.89785	159
2441.38	2697.81	2027.66	1845.94	3058.2	1918.85	2814.9	2046.93	2615.66	1862.04	1933.94	3981.52	2589.61		118.191	115.507	118.776	117.718	116.602	120.108	116.245	125.875	119.421	115.133	118.579	119.04	117.095		118.33	2.62364	160
2431.5	2701.04	2009.77	1846.69	3049.81	1927.48	2814.3	2041.44	2610.79	1860.64	1934.19	3983.17	2598.36		117.713	115.645	117.728	117.766	116.282	120.648	116.22	125.538	119.199	115.046	118.594	119.089	117.491		118.228	2.58681	161
2439.82	2697.03	2024.17	1834.38	3050.16	1913.36	2820.49		2609.7	1869.2	1941.31	3985.73	2587.73		118.116	115.474	118.572	116.981	116.296	119.764	116.476		119.149	115.576	119.031	119.166	117.011				162
2437.54	2691.08	2006.78	1842.7	3052.9	1917.69	2804.56		2599.15	1874.95	1941.47	3992.89	2581.65		118.005	115.219	117.553	117.511	116.4	120.036	115.818		118.667	115.931	119.04	119.38	116.736				163
2455.22	2700.06	1994.95	1833.1	3059.45	1926.3	2813.45	2049.74	2606.61	1876.56	1941.45	3986.56	2572.21		118.862	115.604	116.86	116.9	116.65	120.574	116.185	126.048	119.008	116.031	119.039	119.191	116.309		118.251	2.70243	164
2446.31	2686.08	2011.98	1836.75	3027.92	1925.89	2809.47	2048.1	2596.39	1876.62	1935.6	3993.4	2583.44		118.43	115.005	117.857	117.132	115.448	120.549	116.021	125.947	118.541	116.035	118.681	119.395	116.817		118.143	2.7416	165
2439.48	2700	2006.28	1849.08	3034.1	1935.28	2817.8	2060.41	2608.04	1860.56	1940.55	3996.72	2574.09		118.099	115.601	117.524	117.919	115.683	121.137	116.365	126.704	119.073	115.041	118.984	119.494	116.394		118.309	2.96237	166
2467.74	2693.82	2019.08	1850.9	3054.52	1935.59	2803.19	2049.89	2614.8	1868.88	1942.65	3988.32	2577.42		119.467	115.336	118.273	118.035	116.462	121.156	115.762	126.057	119.382	115.556	119.113	119.243	116.544		118.491	2.79048	167
2452.33	2676.54	2012.7	1847.39	3030.42	1924.47	2812.44	2040.24	2598.7	1856.23	1940.86	3994.48	2573.12		118.721	114.596	117.899	117.811	115.543	120.46	116.144	125.464	118.647	114.774	119.003	119.427	116.35		118.065	2.77251	168
2443.2	2690.26	2017.71	1830.85	3036.37	1931.59	2804.23	2043.35	2610.62	1867.71	1936.55	4003.6	2578.92		118.28	115.184	118.193	116.756	115.77	120.905	115.804	125.655	119.191	115.484	118.739	119.7	116.612		118.175	2.7616	169
2439.81	2690.26	2013.26	1844.23	3047.17	1920.8	2809.74	2051.36	2615.34	1859.05	1946.65	4007.38	2582.24		118.115	115.184	117.932	117.609	116.182	120.23	116.032	126.147	119.406	114.948	119.358	119.813	116.762		118.286	2.82196	170
2442.57	2690.58	2026.11	1839.18	3047.94	1933.56	2802.56	2036.92	2614.24	1855.89	1940.43	3988.57	2567.17		118.249	115.198	118.685	117.287	116.211	121.029	115.735	125.26	119.356	114.753	118.977	119.251	116.081		118.159	2.73657	171
2456.12	2676.97	2015.16	1840.67	3043.29	1929.52	2801.17	2046.8	2619.85	1861.18	1939.24	3982.97	2578.15		118.905	114.615	118.044	117.382	116.034	120.776	115.678	125.867	119.613	115.08	118.904	119.084	116.577		118.197	2.8576	172
2441.25	2687.02	2006.97	1845.64	3032.45	1918.76	2795.47	2035.52	2603.72	1851.33	1938.09	3990.25	2572.81		118.185	115.045	117.564	117.699	115.621	120.102	115.443	125.174	118.876	114.471	118.833	119.301	116.336		117.896	2.7085	173
2452.93	2694.39	2008.4	1835.41	3030.19	1930.94	2783.3	2029.06	2602.36	1856.07	1931.52	3983.34	2563.38		118.751	115.361	117.648	117.047	115.534	120.865	114.94	124.776	118.814	114.764	118.43	119.094	115.91		117.841	2.69888	174
2442.07	2678.15	2014.69	1848.06	3030.56	1920.27	2787.74	2038.85	2611.13	1852.19	1925.87	4001.41	2557.1		118.225	114.665	118.016	117.853	115.548	120.197	115.124	125.379	119.214	114.524	118.084	119.635	115.626		117.853	2.86006	175
2453.31	2676.03	2010.18	1833.34	3026.84	1917.67	2774.25	2044.88	2614.79	1838.26	1936.32	3977.64	2553.59		118.769	114.575	117.752	116.915	115.407	120.034	114.566	125.749	119.382	113.663	118.725	118.924	115.467		117.687	3.08234	176
2448.05	2672.35	2001.64	1848.33	3028.03	1923.68	2777.77	2022.77	2621.06	1847.66	1925.33	3983.72	2563.15		118.515	114.417	117.252	117.871	115.452	120.41	114.712	124.389	119.668	114.244	118.051	119.106	115.899		117.691	2.75828	177
2445.2	2686.57	2013.49	1839.22	3023.22	1924.32	2765.78	2043.94	2604.93	1843.24	1930.7	3975.99	2558.56		118.376	115.026	117.946	117.29	115.269	120.45	114.217	125.691	118.931	113.97	118.38	118.875	115.691		117.701	3.02051	178
2460.7	2670.44	2012.81	1835.13	3022	1920.86	2783.88	2031.49	2613.52	1855.36	1936.3	3994.16	2548.11		119.127	114.335	117.906	117.029	115.222	120.234	114.964	124.926	119.324	114.72	118.724	119.418	115.219		117.781	2.87824	179
2443.89	2681.18	2004.52	1846.44	3020.25	1928.3	2784.78	2035.96	2608.47	1848.83	1938.31	3996.56	2562.3		118.313	114.795	117.42	117.75	115.155	120.699	115.001	125.201	119.093	114.316	118.847	119.49	115.861		117.842	2.89484	180
2443.63	2667.73	2002.73	1828.99	3003.93	1922.72	2777.2	2029.74	2614.01	1843.9	1940.9	3986.43	2546.67		118.3	114.219	117.315	116.637	114.533	120.35	114.688	124.818	119.346	114.011	119.006	119.187	115.154		117.505	2.99706	181
2439.28	2671.74	2004.74	1836.07	3019.24	1926.49	2774.27	2028.6	2603.76	1844.96	1926.95	3996.35	2559.06		118.09	114.391	117.433	117.089	115.117	120.586	114.567	124.748	118.878	114.077	118.15	119.484	115.714		117.563	2.87749	182
2458.32	2659.34	2015.13	1857.58	3019.42	1912.94	2773.91	2032.05	2620.39	1836.13	1941.91	3978.7	2547.07		119.012	113.86	118.042	118.46	115.124	119.738	114.553	124.96	119.637	113.531	119.068	118.956	115.172		117.701	3.05759	183
2438.97	2672.52	2011.92	1853.81	3008.86	1936.34	2755.14	2017	2616.35	1845.64	1939.61	3991.81	2547.97		118.075	114.424	117.854	118.22	114.721	121.203	113.777	124.035	119.453	114.119	118.927	119.348	115.212		117.644	2.9624	184
2453.65	2674.03	2009.82	1826.6	3009.75	1922.3	2767.09	2021.23	2620.09	1831.15	1935.96	3991.9	2543.99		118.786	114.489	117.731	116.485	114.755	120.324	114.271	124.295	119.623	113.223	118.703	119.35	115.032		117.467	3.00843	185
2437.33	2660.93	2015.94	1850.01	2998.22	1911.64	2754.16	2028.79	2589.51	1833.77	1942.41	3983.88	2531.75		117.995	113.928	118.089	117.978	114.315	119.657	113.737	124.76	118.227	113.385	119.098	119.111	114.479		117.289	3.11807	186
2437.53	2654.44	2020.4	1834.59	3014.17	1923.11	2760.81	2031.69	2602.67	1827.56	1927.94	3979.49	2537.61		118.005	113.65	118.35	116.994	114.924	120.375	114.011	124.938	118.828	113.001	118.211	118.979	114.744		117.309	3.16546	187
2434.82	2658.27	2008.19	1838.14	3014.73	1922.18	2759.17	2017.84	2606.29	1837.76	1940.26	3987.3	2534.58		117.874	113.814	117.635	117.221	114.945	120.316	113.944	124.086	118.994	113.632	118.967	119.213	114.607		117.327	2.96858	188
2452.32	2658.83	2011.77	1829.87	3013.74	1920.58	2753.61	2029.21	2612.78	1836.12	1934.94	3986.39	2538.22		118.721	113.838	117.845	116.693	114.907	120.216	113.714	124.786	119.29	113.53	118.64	119.186	114.772		117.395	3.13278	189
2454.2	2654.52	2000.25	1829.89	2994.22	1911.96	2746.79	2034.71	2604.32	1838.48	1943.59	3987.05	2528.68		118.812	113.654	117.17	116.694	114.163	119.677	113.433	125.124	118.903	113.676	119.17	119.205	114.34		117.232	3.27178	190
2452.98	2651.32	2003.39	1839.24	3000.17	1928.93	2752.09	2029.11	2606.39	1837.35	1934.54	3986.2	2530.89		118.753	113.516	117.354	117.291	114.39	120.739	113.651	124.779	118.998	113.606	118.616	119.18	114.44		117.332	3.23363	191
2443.58	2654.95	2029.37	1843.24	2985.91	1925.86	2730.86	2011.4	2598.44	1830.14	1934.31	3974.1	2526.21		118.298	113.672	118.876	117.546	113.846	120.547	112.775	123.69	118.635	113.161	118.602	118.818	114.229		117.13	3.19206	192
2449.22	2660.18	2019.76	1835.05	3005.03	1932.19	2753.86	2017.13	2601.98	1816.15	1931.51	3992.57	2527.86		118.571	113.896	118.313	117.024	114.575	120.943	113.724	124.042	118.797	112.295	118.43	119.37	114.303		117.253	3.22306	193
2453.71	2659.71	2019.04	1844.28	3001.83	1921.23	2725.79	2018.07	2599.48	1822.31	1936.03	3984.95	2529.42		118.789	113.876	118.271	117.612	114.453	120.257	112.565	124.1	118.682	112.676	118.707	119.143	114.374		117.193	3.25303	194
2441.4	2656.03	2016.5	1836.4	2987.17	1926.75	2742.35	2018.18	2601.85	1835.27	1934.39	3980.23	2509.95		118.193	113.718	118.122	117.11	113.894	120.603	113.249	124.108	118.791	113.478	118.606	119.001	113.493		117.105	3.22284	195
2441.23	2661.19	2008.01	1831.66	2990.82	1924.13	2735.59	2022.25	2592.03	1827.75	1936.57	3975.99	2515.43		118.184	113.939	117.625	116.807	114.033	120.439	112.97	124.357	118.342	113.012	118.74	118.875	113.741		117.005	3.24698	196
2440.19	2652.13	2008.94	1835.99	2985.99	1915.92	2728.68	2032.71	2613.34	1829.11	1934.58	3979.97	2521.24		118.134	113.551	117.679	117.084	113.849	119.925	112.685	125.001	119.315	113.097	118.618	118.994	114.004		117.072	3.40657	197
2445.02	2660.28	2009.43	1847.14	2978.34	1915.53	2736.69	2018.45	2609.88	1827.1	1930.21	3986.22	2516.48		118.367	113.9	117.708	117.795	113.557	119.9	113.016	124.124	119.158	112.973	118.35	119.181	113.789		117.063	3.24883	198
2452.73	2649.96	2008.19	1825.04	2988.27	1933.33	2743.12	2025.19	2620.29	1810.16	1935.29	3985.09	2503.13		118.741	113.458	117.635	116.385	113.936	121.014	113.281	124.538	119.633	111.925	118.661	119.147	113.185		117.042	3.5852	199
2444.54	2639.3	2012.45	1817.43	2994.12	1939.89	2736.22	2017.18	2606.49	1816.91	1933.68	3985.16	2504.81		118.344	113.002	117.885	115.9	114.159	121.425	112.996	124.046	119.003	112.342	118.563	119.149	113.261		116.929	3.50592	200
2449.02	2655.78	1999.57	1833.27	2992.24	1920.09	2742.53	2012.62	2615.98	1816.32	1922.69	3983.87	2509.4		118.562	113.708	117.13	116.91	114.088	120.186	113.257	123.765	119.436	112.306	117.889	119.11	113.468		116.909	3.24971	201
2450.86	2640.63	2000.29	1823.95	2968.2	1931.61	2736.94	2018.97	2591.46	1812.82	1949.07	3985.81	2506.14		118.65	113.059	117.172	116.316	113.171	120.907	113.026	124.156	118.316	112.09	119.507	119.168	113.321		116.835	3.57007	202
2434.51	2632.78	1997.26	1845.33	2982.05	1949.84	2733.55	2004.22	2609.4	1822.65	1933.2	3990.63	2507.17		117.859	112.723	116.995	117.679	113.699	122.048	112.886	123.249	119.136	112.698	118.534	119.313	113.368		116.937	3.46136	203
2451.84	2638.84	2002.89	1832.83	2976.27	1934.36	2743.96	2020.26	2605.77	1820.25	1942.84	3988.79	2500.56		118.698	112.982	117.325	116.882	113.479	121.079	113.316	124.235	118.97	112.549	119.124	119.257	113.069		116.997	3.53939	204
2443.41	2633.58	2017.93	1836.91	2977.04	1934.63	2737.62	2013.11	2621.75	1813.09	1932.44	4002.04	2504.74		118.29	112.757	118.206	117.142	113.508	121.096	113.054	123.795	119.699	112.107	118.487	119.654	113.258		117.004	3.57712	205
2458.31	2624.56	2003.88	1825.74	2970.05	1937.37	2732.57	2005.43	2596.53	1805.39	1945.22	3989.12	2502.21		119.011	112.371	117.383	116.43	113.242	121.267	112.845	123.323	118.548	111.63	119.27	119.267	113.144		116.749	3.62794	206
2432.81	2636.04	2025.58	1840.21	2972.98	1937.86	2731.72	2010.63	2610.59	1818.75	1938.77	3984.11	2498.12		117.777	112.863	118.654	117.353	113.353	121.298	112.81	123.643	119.19	112.456	118.875	119.118	112.958		116.95	3.54943	207
2447.55	2651	2019.34		2971.17	1938.23	2728.9	2016.47	2610.42	1817.18	1942.11	3994.38	2501.42		118.49	113.503	118.289		113.284	121.321	112.694	124.002	119.182	112.359	119.08	119.425	113.108		117.061	3.7391	208
2453.45	2644.29	2014.29		2984.97	1939.38	2733.05	2011.94	2607.15	1822.88	1944.34	3986.08	2493.31		118.776	113.216	117.993		113.81	121.393	112.865	123.723	119.033	112.712	119.216	119.176	112.741		117.055	3.65729	209
2443.67	2637.98	2015.02		2970.02	1919.94	2715.77	2013.26	2604.29	1810.75	1938.05	3993.12	2491.62		118.302	112.945	118.036		113.24	120.176	112.151	123.805	118.902	111.962	118.831	119.387	112.664		116.7	3.75295	210
2436.29	2634.91	2006.49	1834.94	2978.64	1929.13	2728.52	2005.3	2613.96	1809.03	1937.44	3986.17	2485.09		117.945	112.814	117.536	117.017	113.569	120.752	112.678	123.315	119.344	111.855	118.793	119.179	112.369		116.705	3.54479	211
2442.32	2635.6	2008	1835.02	2981.23	1933.92	2723.59	1996.11	2611.54	1796.98	1937.35	3990.05	2492.77		118.237	112.844	117.624	117.022	113.668	121.051	112.474	122.75	119.233	111.11	118.788	119.295	112.716		116.678	3.56696	212
2433.64	2636.17	2001.69	1831.9	2970.7	1925.85	2720.9	2016.53	2615.44	1799.36	1942.78	3991.65	2491.48		117.817	112.868	117.255	116.823	113.266	120.546	112.363	124.006	119.411	111.257	119.121	119.343	112.658		116.672	3.73304	213
2427.44	2638.23	2006.8	1828.55	2963.55	1918.28	2719.08	2002.67	2611.99	1804.77	1939.59	3986.66	2484.57		117.516	112.956	117.554	116.61	112.994	120.073	112.288	123.154	119.254	111.592	118.925	119.194	112.346		116.496	3.55023	214
2443.12	2634.85	1999.12	1831.49	2958.82	1912.62	2705.39	2018.89	2587.72	1806.64	1941.35	3985.72	2477.21		118.275	112.812	117.104	116.797	112.813	119.718	111.723	124.151	118.146	111.708	119.033	119.166	112.013		116.42	3.73919	215
2444.43	2637.99	2016.92	1841.31	2963.99	1921.07	2721.92	2002.6	2598.27	1797.2	1944.35	3992.63	2473.3		118.339	112.946	118.147	117.423	113.011	120.247	112.406	123.149	118.627	111.124	119.217	119.372	111.836		116.603	3.69447	216
2444.09	2629.16	2007.92	1832.89	2958.67	1928.32	2704.7	2002.98	2589.79	1803.88	1939.75	3991.6	2479.36		118.322	112.568	117.619	116.886	112.807	120.701	111.694	123.173	118.24	111.537	118.935	119.341	112.11		116.457	3.72093	217
2462.01	2639.83	2005.16	1819.88	2955.14	1931.92	2714.49	2012.95	2598.48	1800.79	1933.07	3981.69	2474.4		119.19	113.025	117.458	116.056	112.673	120.926	112.098	123.786	118.637	111.346	118.525	119.045	111.886		116.512	3.82416	218
2436.23	2636.06	2006.34	1823.87	2957.23	1933.87	2704.37	2007.4	2598.62	1789.46	1944.02	3996.85	2473.81		117.942	112.863	117.527	116.311	112.753	121.048	111.681	123.444	118.643	110.645	119.197	119.498	111.859		116.416	3.91403	219
2438.1	2642.52	2008.55	1839.07	2956.29	1927.26	2695.6	2004.79	2604.22	1796.89	1942.27	3980.17	2466.84		118.033	113.14	117.656	117.28	112.717	120.634	111.318	123.284	118.899	111.105	119.09	119	111.544		116.438	3.84495	220
2435.26	2639.36	2011.52	1841.55	2947.9	1924.51	2696	2016.17	2604.24	1798.81	1934.23	3991.52	2466.63		117.895	113.005	117.83	117.438	112.397	120.462	111.335	123.984	118.9	111.223	118.597	119.339	111.534		116.457	3.94898	221
2446.02	2644.43	2012.15	1821.81	2950.04	1930.63	2692.27	1990.18	2596.08	1793.16	1945.34	3974.08	2458.43		118.416	113.222	117.867	116.179	112.478	120.845	111.181	122.386	118.527	110.874	119.278	118.818	111.164		116.249	3.83188	222
2440.17	2645.25	2011.32	1824.38	2956.56	1915.33	2686.52	2001.68	2599	1800.48	1933.94	3979.01	2456.73		118.133	113.257	117.819	116.343	112.727	119.888	110.944	123.093	118.661	111.327	118.579	118.965	111.087		116.217	3.77322	223
2438.29	2645.57	2010.58	1822.89	2948.68	1915.78	2679.67	2002.61	2592.58	1793	1919.12	3992.61	2460.87		118.042	113.27	117.776	116.248	112.426	119.916	110.661	123.15	118.367	110.864	117.67	119.372	111.274		116.08	3.83262	224
2440.19	2632.6	2004.84	1824.5	2956.09	1927.08	2691.26	1989.92	2608.94	1791.92	1923.22	3991.15	2458.82		118.134	112.715	117.439	116.351	112.709	120.623	111.139	122.37	119.114	110.798	117.921	119.328	111.182		116.14	3.80715	225
2439.56	2632.44	2009.85	1830.66	2942.7	1920.58	2676.02	2009.41	2591.49	1777.72	1935.56	3992.21	2463.58		118.103	112.708	117.732	116.744	112.199	120.216	110.51	123.568	118.318	109.919	118.678	119.36	111.397		116.112	4.11642	226
2441.98	2634.83	1996.83	1835.51	2957.25	1918.8	2674.45	1990.23	2591.03	1781.17	1946.16	3987.57	2465.31		118.221	112.81	116.97	117.053	112.753	120.105	110.445	122.388	118.297	110.133	119.328	119.221	111.475		116.092	3.89999	227
2447.59	2630.68	2003.26	1828.54	2943.06	1938.61	2666.69	2003.89	2582.56	1779.54	1936.34	3974.46	2451.5		118.492	112.633	117.346	116.609	112.213	121.345	110.125	123.228	117.91	110.032	118.726	118.829	110.85		116.026	4.21194	228
2439.12	2644.65	2012.07	1832.42	2935.36	1931.85	2669.77	2003.75	2600.02	1779.32	1941.35	3977.22	2439.63		118.082	113.231	117.863	116.856	111.919	120.922	110.252	123.22	118.707	110.019	119.033	118.912	110.314		116.102	4.25388	229
2437.15	2639.23	2008.5	1818.7	2943.09	1921.45	2687.45	2004.13	2605.07	1783.46	1931.36	3991.15	2455.11		117.987	112.999	117.654	115.981	112.214	120.271	110.982	123.243	118.938	110.274	118.421	119.328	111.014		116.1	4.00953	230
2447.82	2643.17	2017.45	1840.59	2938.49	1916.58	2667.39	2006.87	2584.82	1771.37	1935.74	3978.33	2454.51		118.503	113.167	118.178	117.377	112.038	119.966	110.154	123.412	118.013	109.527	118.689	118.945	110.987		116.074	4.19148	231
2438.92	2633.76	1995.94	1839.98	2939.51	1920.9	2666.81	2003.91	2593.63	1777.93	1946.59	3979.6	2432.46		118.072	112.765	116.918	117.338	112.077	120.236	110.129	123.23	118.416	109.932	119.355	118.983	109.99		115.957	4.26404	232
2443.96	2618.4	2002.74	1816.57	2945.17	1929.61	2662.31	1982.48	2595.47	1779.12	1945.59	3979.1	2442.44		118.316	112.107	117.316	115.846	112.293	120.781	109.944	121.912	118.5	110.006	119.293	118.968	110.441		115.825	4.14024	233
2428.63	2630.36	1999.9	1822.69	2929.32	1922.62	2670	2006.59	2593.61	1779.18	1942.56	3976.78	2435.69		117.574	112.619	117.149	116.235	111.689	120.344	110.261	123.395	118.414	110.01	119.107	118.898	110.136		115.833	4.24403	234
2440.67	2650.25	1997.63	1821.94	2931.9	1927.26	2664.69	2005.03	2593.26	1769.12	1928.97	3979.22	2432		118.157	113.471	117.017	116.188	111.787	120.634	110.042	123.299	118.399	109.388	118.274	118.971	109.969		115.815	4.29244	235
2429	2631.78	2000.8	1822.18	2928.66	1938.26	2667.77	1993.44	2596.24	1768.95	1941.93	3970.51	2440.55		117.592	112.68	117.203	116.203	111.663	121.323	110.169	122.586	118.534	109.377	119.069	118.711	110.355		115.805	4.27854	236
2440.86	2627.79	2013.84	1821.22	2933.15	1909.42	2657.74	2004.22	2590.85	1764.41	1929.63	3982.12	2430.05		118.166	112.509	117.966	116.142	111.835	119.517	109.755	123.249	118.288	109.096	118.315	119.058	109.881		115.675	4.34755	237
2431.04	2634.39	1998.67	1820.38	2926.54	1928.8	2668.39	2002.48	2584.96	1780.63	1938.93	3998.95	2436.18		117.691	112.792	117.078	116.088	111.583	120.731	110.195	123.142	118.02	110.099	118.885	119.561	110.158		115.848	4.24855	238
2438.03	2637.58	1992.57	1820.75	2924.41	1912.92	2654.58	1996.42	2591.06	1776.37	1945.51	3988.32	2423.85		118.029	112.928	116.721	116.112	111.501	119.737	109.624	122.769	118.298	109.836	119.288	119.243	109.6		115.668	4.28678	239
2430.74	2635.88	1992.15	1824.7	2927.49	1921.47	2656.15	2001.39	2591.57	1783.86	1936.49	3989.38	2424.78		117.676	112.855	116.696	116.364	111.619	120.272	109.689	123.075	118.322	110.299	118.735	119.275	109.642		115.732	4.26275	240
2430.58	2608.16	1997.62	1822.8	2930.59	1932.23	2668.02	1999.67	2592.88	1776.36	1941.48	3977.66	2415.67		117.669	111.669	117.016	116.242	111.737	120.946	110.18	122.969	118.381	109.835	119.041	118.925	109.231		115.68	4.41751	241
2429.6	2623.93	2001.17	1812.89	2929.47	1938.66	2670.72	1997.92	2594.56	1773.18	1938.94	3986.99	2420.54		117.621	112.344	117.224	115.611	111.694	121.348	110.291	122.862	118.458	109.639	118.885	119.204	109.45		115.741	4.39913	242
2438.15	2615.97	2007.94	1813.71	2923.59	1927.86	2669.38	1983.08	2597.52	1777.3	1934.63	3982.39	2414.54		118.035	112.003	117.621	115.663	111.47	120.672	110.236	121.949	118.593	109.894	118.621	119.066	109.179		115.615	4.28505	243
2450	2625.76	1991.8	1818.05	2927.55	1930.1	2652.2	2001.41	2602.25	1761.33	1933.94	3986.02	2425.82		118.609	112.422	116.675	115.94	111.621	120.812	109.526	123.076	118.809	108.906	118.579	119.175	109.689		115.68	4.53882	244
2434.79	2611.94	2000.58	1831.8	2922.66	1929.14	2652.58	1988.39	2587.27	1762.52	1938.4	3984	2419.08		117.872	111.83	117.19	116.817	111.435	120.752	109.542	122.275	118.125	108.979	118.852	119.114	109.385		115.551	4.47444	245
2435.79	2621.75	2007.54	1826.67	2935.53	1932.03	2649.22	1999.03	2592.97	1760.53	1938.49	3978.81	2415.49		117.921	112.251	117.597	116.489	111.925	120.933	109.403	122.93	118.385	108.856	118.858	118.959	109.222		115.672	4.56739	246
2440.13	2623.01	1999.9	1822.84	2906.93	1926.31	2643.88	1994.31	2596.02	1754.32	1938.54	3969.66	2418.18		118.131	112.304	117.15	116.245	110.835	120.575	109.183	122.639	118.525	108.473	118.861	118.685	109.344		115.458	4.61325	247
2443.38	2623.58	1991.69	1828.17	2914.55	1924.46	2660.34	2004.18	2585.44	1757.09	1946.7	3977.71	2422.34		118.288	112.329	116.669	116.585	111.125	120.459	109.862	123.247	118.042	108.644	119.361	118.926	109.532		115.621	4.56951	248
2431.16	2609.21	1999.82	1828.08	2920.11	1936.52	2648.91	1972.59	2589.95	1754.17	1932.9	3978.96	2409.1		117.697	111.714	117.145	116.58	111.337	121.214	109.39	121.304	118.248	108.463	118.515	118.964	108.933		115.346	4.51479	249
2432.84	2607.36	1996.16	1827.66	2893.73	1936.19	2649.42	2000.63	2607.42	1748.67	1941.02	3991.96	2408.42		117.778	111.634	116.931	116.553	110.332	121.194	109.411	123.028	119.045	108.123	119.013	119.352	108.903		115.484	4.91341	250
2443.1	2608.69	1993.43	1829.53	2903.59	1936.54	2647.51	1984.55	2589.37	1755.48	1928.21	3992.43	2396.34		118.275	111.692	116.771	116.672	110.708	121.216	109.333	122.039	118.221	108.544	118.228	119.366	108.356		115.34	4.72719	251
2436.58	2596.02	1994.32	1822.52	2901.97	1934.59	2654.3	1989.18	2608.24	1750.66	1946.8	3982.66	2402.87		117.959	111.149	116.823	116.225	110.646	121.093	109.613	122.324	119.082	108.246	119.367	119.074	108.652		115.404	4.83013	252
2423.11	2606.53	1992.44	1818.88	2907.69	1929.33	2659.11	1985.85	2596.2	1737.43	1934.3	3971.41	2408.35		117.307	111.599	116.712	115.993	110.864	120.764	109.812	122.119	118.533	107.428	118.601	118.738	108.899		115.182	4.65988	253
2413.01	2602.3	2007.84	1826.97	2902.98	1922.63	2641.9	1986.72	2601.19	1731.85	1948.74	3984.35	2399.1		116.818	111.418	117.615	116.508	110.684	120.345	109.101	122.172	118.761	107.083	119.486	119.125	108.481		115.2	4.91957	254
2418.24	2602.63	2012.42	1821.1	2891.32	1919.67	2628.09	1986.95	2591.99	1732.2	1934.66	3985.33	2407.09		117.071	111.432	117.883	116.134	110.24	120.159	108.531	122.187	118.34	107.105	118.623	119.154	108.842		115.054	4.89238	255
2433.53	2603.33	1999.71	1808.87	2896.44	1922.46	2615.36	1977.59	2594.71	1742.02	1939.97	3989.26	2391.32		117.811	111.462	117.138	115.354	110.435	120.334	108.005	121.611	118.465	107.712	118.948	119.271	108.129		114.975	4.90844	256
2435.55	2601.03	2006.42	1833.23	2898.79	1928.9	2624.83	1976.16	2589.4	1733.45	1937.77	3984.92	2399.43		117.909	111.364	117.532	116.908	110.524	120.737	108.396	121.523	118.223	107.182	118.814	119.142	108.496		115.134	4.9312	257
2431.35	2604.92	1995.41	1832.29	2890.46	1924.17	2613.59	1998.03	2597.4	1737.64	1940.24	3989.69	2401.35		117.706	111.53	116.887	116.848	110.207	120.441	107.932	122.868	118.588	107.441	118.965	119.284	108.583		115.175	5.08125	258
2420.18	2583.26	1993.64	1813.97	2882.71	1933.15	2611.96	1973.13	2585.47	1722.08	1955.73	3974.25	2388.11		117.165	110.603	116.783	115.679	109.912	121.003	107.865	121.337	118.043	106.479	119.915	118.823	107.984		114.738	5.18598	259
2429.24	2598.87	1992.35	1814.4	2890.99	1904.13	2605.52	1991.82	2592.12	1730.29	1940.89	3983.35	2380.93		117.604	111.271	116.707	115.707	110.227	119.186	107.599	122.486	118.346	106.987	119.005	119.095	107.66		114.76	5.08835	260
2432.33	2595.72	1992.9	1812.16	2888.9	1923.85	2601.1	1978.18	2588.75	1751.69	1925.03	3980.9	2381.04		117.753	111.136	116.74	115.564	110.147	120.421	107.416	121.647	118.193	108.31	118.032	119.022	107.664		114.773	4.9143	261
2427.51	2592.81	1996.66	1818.62	2882.05	1932.27	2600.26	1981.97	2586.15	1733.3	1933.67	3986.18	2385.59		117.52	111.011	116.96	115.976	109.886	120.948	107.381	121.881	118.074	107.173	118.562	119.179	107.87		114.802	5.15279	262
2435.17	2589.35	1992.63	1808.74	2877.72	1939.79	2594.95	1990.17	2589.35	1726.83	1944.44	3981.16	2378.21		117.891	110.863	116.724	115.346	109.721	121.419	107.162	122.385	118.22	106.773	119.223	119.029	107.536		114.792	5.41266	263
2434.84	2568	1982.87	1828.49	2873.43	1915.13	2600.92	1986.06	2581	1722.47	1933.74	3969.41	2380.7		117.875	109.949	116.152	116.605	109.558	119.875	107.409	122.132	117.839	106.503	118.566	118.678	107.649		114.522	5.24138	264
2429.42	2580.26	1999.38	1820.47	2867	1929.93	2594.26	1979.67	2578.98	1722.74	1938.16	3982.45	2377.13		117.613	110.474	117.119	116.094	109.312	120.802	107.134	121.739	117.746	106.52	118.837	119.068	107.487		114.611	5.34571	265
2428	2573.65	1986.62	1820.76	2873.71	1922.64	2599.99	1988.02	2584.34	1706.17	1939.26	3983.46	2376.22		117.544	110.191	116.372	116.113	109.568	120.345	107.37	122.252	117.991	105.496	118.905	119.098	107.447		114.515	5.45555	266
2435.49	2575.07	1993.87	1824.1	2864.79	1926.6	2589.19	1981.49	2589.12	1716.87	1933.44	3985.95	2369.14		117.906	110.252	116.796	116.325	109.228	120.593	106.924	121.851	118.209	106.157	118.548	119.172	107.126		114.545	5.48093	267
2445.82	2578	1995.64	1806.04	2876.72	1926.8	2593.06	1990.33	2589.58	1714.45	1940.33	3978.26	2361.11		118.406	110.377	116.9	115.174	109.683	120.606	107.084	122.394	118.231	106.007	118.97	118.942	106.763		114.58	5.55956	268
2418.44	2575.38	1999.41	1818.13	2863.48	1922.39	2582.15	1979.24	2588.31	1713.5	1937.73	3978.14	2356.59		117.081	110.265	117.121	115.945	109.178	120.329	106.633	121.713	118.173	105.949	118.811	118.939	106.559		114.361	5.52953	269
2425.68	2570.64	1989.24	1814.76	2858.11	1935.27	2593.08	1983.21	2586.8	1725.02	1934.51	3978.84	2364.61		117.431	110.062	116.525	115.73	108.973	121.136	107.085	121.957	118.104	106.661	118.614	118.96	106.921		114.474	5.46141	270
2433.35	2570.14	1989.16	1812.98	2856.59	1922.16	2585.31	1976.82	2597.64	1717.22	1929.04	3987.9	2362.23		117.803	110.041	116.521	115.616	108.915	120.315	106.764	121.564	118.599	106.179	118.278	119.231	106.814		114.357	5.49391	271
2430.61	2566.4	1985.81	1815.85	2857.87	1924.39	2595.77	1978.8	2594.84	1715.5	1931.93	3981.74	2374.51		117.67	109.881	116.324	115.799	108.964	120.455	107.196	121.686	118.471	106.072	118.456	119.047	107.369		114.415	5.41624	272
2429.78	2559.16	1995.33	1807.63	2854.06	1920.16	2587.2	1977.08	2592.02	1705.38	1940.9	3978.51	2370.23		117.63	109.571	116.882	115.275	108.819	120.19	106.842	121.58	118.342	105.447	119.006	118.95	107.176		114.285	5.57229	273
2433.34	2549.97	1989.58	1801.15	2863.75	1917.54	2595.2	1966.69	2600.23	1707.31	1934.81	3982.71	2360.66		117.802	109.177	116.545	114.862	109.188	120.026	107.172	120.941	118.717	105.566	118.632	119.076	106.743		114.188	5.4913	274
2428.06	2547.02	1995.34	1793.35	2855.36	1915.02	2575.62	1990.98	2593.84	1698.82	1928.78	3983.1	2354.76		117.547	109.051	116.883	114.365	108.868	119.869	106.364	122.435	118.425	105.041	118.262	119.087	106.476		114.052	5.79263	275
2435.53	2561.1	2008.06	1803.49	2850.94	1937.15	2592.75	1967.8	2598.11	1705.53	1932.7	3981.88	2355.29		117.908	109.654	117.628	115.011	108.7	121.253	107.071	121.009	118.62	105.456	118.503	119.051	106.5		114.336	5.69144	276
2440.51	2557.85	2003.12	1810.33	2840.05	1918.19	2593.92	1974.6	2607.72	1695.58	1930.01	3976.15	2352.21		118.149	109.515	117.338	115.447	108.285	120.067	107.12	121.427	119.059	104.841	118.338	118.879	106.361		114.217	5.76723	277
2430.78	2563.36	1991.07	1803.15	2829.88	1921.77	2578.3	1973.46	2593.06	1695.83	1918.11	3977.29	2354.29		117.678	109.751	116.632	114.989	107.897	120.291	106.474	121.357	118.389	104.856	117.608	118.914	106.455		113.946	5.71106	278
2432.91	2545.58	2003.17	1800.51	2846.92	1922.98	2574.26	1973.73	2591.24	1694.13	1935.63	3980.5	2346		117.781	108.989	117.342	114.821	108.547	120.366	106.307	121.374	118.307	104.751	118.682	119.009	106.08		114.027	5.87621	279
2431.66	2558.33	1995.32	1800.03	2841.87	1938.56	2580	1966.42	2599.25	1698.4	1939.36	3981.01	2349.16		117.721	109.535	116.881	114.79	108.354	121.342	106.545	120.924	118.672	105.015	118.911	119.025	106.223		114.149	5.84495	280
2415.06	2551.01	1998.6	1802.84	2834.23	1913.05	2572.47	1966.08	2592.81	1690.94	1928.9	3981.24	2341.46		116.917	109.222	117.073	114.97	108.063	119.745	106.234	120.903	118.378	104.554	118.27	119.032	105.875		113.787	5.78681	281
2418.78	2554.41	1991.62	1795.09	2820.3	1919.52	2572.89	1979.88	2594.05	1692.25	1925.6	3980.87	2350.91		117.097	109.367	116.665	114.476	107.532	120.15	106.251	121.752	118.435	104.635	118.067	119.021	106.302		113.827	5.85838	282
2432.91	2548.32	1990.01	1804.67	2831.63	1933.85	2560.46	1979.04	2585.32	1682.52	1942.48	3984.81	2349.93		117.781	109.107	116.57	115.087	107.964	121.047	105.738	121.7	118.036	104.033	119.103	119.138	106.258		113.966	6.12483	283
2421.83	2557.88	1986.61	1784.41	2829.11	1925.2	2558.08	1963.89	2581.76	1692.36	1934.02	3994.45	2344.69		117.245	109.516	116.371	113.795	107.868	120.505	105.639	120.769	117.873	104.642	118.584	119.427	106.021		113.712	5.86762	284
2432.92	2543.8	1997.95	1799.47	2828.19	1933.27	2548.08	1981.84	2577.95	1689.2	1933.96	3979.29	2327.42		117.782	108.913	117.035	114.755	107.833	121.011	105.226	121.872	117.7	104.446	118.58	118.973	105.24		113.797	6.22025	285
2434.21	2544.27	1999.42	1802.85	2815.86	1932.48	2557.25	1967	2605.6	1694.22	1937.63	3973.57	2338.67		117.844	108.933	117.122	114.971	107.362	120.961	105.605	120.96	118.962	104.757	118.805	118.802	105.749		113.91	6.11902	286
2434.92	2554.65	1996.93	1806.17	2817.04	1921.33	2556.93	1980.32	2591.04	1687.45	1944.12	3973.55	2342.16		117.879	109.378	116.976	115.182	107.407	120.263	105.592	121.779	118.297	104.338	119.203	118.802	105.906		113.923	6.12652	287
2432.99	2536.91	1991.98	1786.67	2813.7	1916.49	2550	1972.69	2594.49	1679.75	1934.55	3992.74	2323.61		117.785	108.618	116.686	113.939	107.28	119.96	105.306	121.31	118.455	103.862	118.616	119.375	105.067		113.558	6.26526	288
2419.94	2555.14	1988.74	1794.89	2807.47	1917.65	2569.76	1975.28	2585.73	1680.27	1937.49	3978.49	2323.22		117.153	109.399	116.496	114.463	107.043	120.033	106.122	121.469	118.055	103.894	118.797	118.949	105.05		113.609	6.10435	289
2436.13	2534.05	1987.63	1788.35	2808.28	1914.94	2537.03	1958.46	2593.14	1680.23	1936.21	3977.33	2337.58		117.937	108.496	116.431	114.046	107.074	119.863	104.77	120.435	118.393	103.892	118.718	118.915	105.699		113.436	6.16013	290
2424.13	2533.2	1982.19	1797.15	2788.74	1913.68	2550.44	1980.33	2577.63	1679.8	1933.75	3978.95	2340.14		117.357	108.459	116.112	114.607	106.329	119.784	105.324	121.779	117.685	103.865	118.567	118.963	105.815		113.434	6.19879	291
2430.76	2539.35	1992.99	1796.41	2795.9	1915.32	2526.53	1957.91	2586.87	1673.71	1937.55	3971.49	2329.89		117.678	108.723	116.745	114.559	106.601	119.887	104.337	120.401	118.107	103.488	118.8	118.74	105.351		113.34	6.29391	292
2437.99	2545.64	1994.11	1804.76	2805.56	1915.7	2532.49	1967.46	2579.99	1676.88	1925.64	3987.07	2326.89		118.027	108.992	116.81	115.092	106.97	119.911	104.583	120.988	117.792	103.684	118.07	119.206	105.216		113.488	6.26647	293
2423.62	2542.37	1992.47	1795.42	2792.45	1909.45	2539.61	1958.28	2575.01	1674.69	1932.03	3985.68	2329.2		117.332	108.852	116.715	114.497	106.47	119.52	104.877	120.423	117.565	103.549	118.461	119.165	105.32		113.288	6.16536	294
2421.65	2525.16	1979.42	1792.9	2793.12	1918.35	2526.53	1968.71	2587.48	1671.99	1935.57	3980.23	2330.6		117.236	108.115	115.95	114.336	106.495	120.077	104.337	121.065	118.135	103.382	118.679	119.002	105.384		113.246	6.38001	295
2429.23	2535.05	1970.84	1793.17	2790.92	1924.62	2520.1	1958.46	2592.04	1669.84	1944.83	3984.65	2312.53		117.603	108.539	115.448	114.353	106.412	120.469	104.071	120.435	118.343	103.249	119.247	119.134	104.566		113.221	6.5273	296
2421.11	2520.36	1992.3	1796.44	2787.51	1917.41	2533.14	1963.16	2583.62	1669.77	1935.74	3987.66	2329.21		117.21	107.909	116.704	114.562	106.282	120.018	104.609	120.724	117.958	103.244	118.689	119.224	105.321		113.266	6.40407	297
2425.53	2539.01	1981.2	1786.5	2789.08	1920.78	2520.83	1953.07	2582.87	1673.17	1930.44	3981.4	2324.4		117.424	108.708	116.054	113.928	106.341	120.229	104.101	120.103	117.924	103.455	118.364	119.036	105.103		113.136	6.30693	298
2428.62	2507.18	1986.51	1775.67	2769.77	1914.28	2514.99	1965.6	2577.01	1688.33	1928.62	3979.55	2332.83		117.574	107.345	116.365	113.237	105.605	119.822	103.86	120.874	117.657	104.392	118.253	118.981	105.484		113.035	6.36485	299
2417.11	2526.45	1988.91	1775.34	2774.05	1922.49	2522.6	1962.43	2591.23	1670.01	1935.02	3967.36	2314.86		117.016	108.17	116.506	113.216	105.768	120.336	104.174	120.679	118.306	103.259	118.645	118.617	104.672		113.028	6.50776	300
2438.47	2526.59	1994.05	1797.18	2765.18	1923.28	2514.48	1971.32	2569.31	1676.34	1928.69	3972.66	2312.62		118.05	108.176	116.807	114.609	105.43	120.385	103.839	121.226	117.305	103.651	118.257	118.775	104.571		113.16	6.60384	301
2431.93	2524.6	1982.76	1774.36	2768.54	1911.58	2513.09	1962.1	2582.97	1671.35	1929.53	3986.57	2311.5		117.734	108.091	116.146	113.153	105.558	119.653	103.781	120.658	117.929	103.342	118.308	119.191	104.52		112.928	6.53748	302
2424.7	2527.78	1981.5	1788.27	2758.37	1922.54	2508.26	1964.84	2573.34	1660.07	1929.92	3970.37	2311.36		117.384	108.227	116.072	114.04	105.171	120.339	103.582	120.827	117.489	102.645	118.332	118.707	104.514		112.871	6.66691	303
2415.89	2519.86	1969.05	1794.09	2762.06	1928.25	2520.78	1963.16	2586.74	1666.64	1928.75	3979.88	2306.23		116.958	107.888	115.342	114.412	105.311	120.696	104.099	120.724	118.101	103.051	118.26	118.991	104.282		112.932	6.62758	304
2413.65	2519.82	1976.24	1780.14	2762.86	1918.02	2515.41	1963.13	2591.27	1672.16	1933.81	3975.5	2309.04		116.849	107.886	115.764	113.522	105.342	120.056	103.877	120.722	118.308	103.392	118.571	118.86	104.409		112.889	6.56134	305
2425.75	2517.03	1981.97	1786.42	2773.18	1927.11	2509.31	1956.04	2592.77	1658.69	1925.51	3981.59	2292.05		117.435	107.767	116.1	113.922	105.735	120.625	103.625	120.286	118.376	102.559	118.062	119.042	103.641		112.86	6.77539	306
2422.07	2511.05	1975.84	1779.08	2753.69	1916.38	2510.96	1953.11	2593.56	1654.37	1925	3980.97	2312.23		117.257	107.511	115.74	113.454	104.992	119.953	103.694	120.106	118.412	102.292	118.031	119.023	104.553		112.694	6.68648	307
2410.02	2505.46	1977.04	1775.08	2744.86	1917.43	2518.77	1960.8	2590.9	1646.22	1932.96	3974.48	2290.92		116.673	107.271	115.811	113.199	104.655	120.019	104.016	120.579	118.291	101.788	118.519	118.83	103.59		112.557	6.88055	308
2413.03	2508.43	1976.22	1789.49	2754.16	1921.59	2509.33	1955.01	2583.77	1649.28	1927.58	3966.59	2288.7		116.819	107.399	115.762	114.119	105.01	120.279	103.626	120.222	117.965	101.978	118.189	118.594	103.489		112.573	6.81708	309
2411.73	2513.98	1964.44	1784.09	2749.17	1933.86	2506.04	1949.58	2592.52	1661.4	1924.38	3982.77	2299.57		116.756	107.636	115.073	113.774	104.82	121.047	103.49	119.889	118.365	102.727	117.993	119.077	103.981		112.664	6.75618	310
2412.5	2516.15	1973.55	1787.89	2742.78	1930.14	2514.84	1951.01	2588.93	1650.62	1915.51	3977.22	2295.02		116.793	107.729	115.606	114.016	104.576	120.815	103.854	119.977	118.201	102.061	117.449	118.911	103.775		112.597	6.78688	311
2425.24	2507.33	1978.28	1777.39	2739.71	1934.62	2509.1	1953.78	2586.72	1656.51	1917.51	3979.19	2294.89		117.41	107.352	115.883	113.347	104.459	121.095	103.617	120.147	118.1	102.425	117.571	118.97	103.769		112.627	6.879	312
2423.96	2508.3	1976.28	1776.81	2745.96	1928.84	2506.98	1938.7	2580.24	1643.78	1927.52	3966.21	2304.61		117.348	107.393	115.766	113.31	104.697	120.733	103.529	119.219	117.804	101.638	118.185	118.582	104.209		112.493	6.79018	313
2413.74	2498.09	1968.79	1769.87	2737.32	1926.05	2502.39	1947.25	2589.01	1649.84	1938.06	3981.76	2295.85		116.853	106.956	115.327	112.867	104.368	120.559	103.34	119.745	118.205	102.012	118.831	119.047	103.812		112.456	6.94056	314
2423.71	2500.72	1978.57	1764.53	2737.12	1914.25	2512.27	1958.98	2596.38	1651.5	1938.67	3978.5	2294.47		117.336	107.069	115.9	112.527	104.36	119.82	103.748	120.466	118.541	102.115	118.869	118.95	103.75		112.573	6.94678	315
2405.86	2495.92	1980.17	1766.11	2735.56	1929.84	2497.91	1952.61	2602.03	1647.11	1939.69	3977.52	2291.49		116.472	106.863	115.994	112.628	104.301	120.796	103.154	120.075	118.799	101.843	118.931	118.921	103.615		112.492	7.09987	316
2415.7	2493.33	1978.42	1771.06	2730.66	1927.07	2488.45	1943.07	2596.26	1648.76	1925.12	3980.69	2284.65		116.948	106.752	115.891	112.943	104.114	120.623	102.764	119.488	118.535	101.945	118.038	119.015	103.306		112.336	7.06873	317
2412.55	2484.44	1965.87	1773.71	2736.09	1917.79	2492.58	1934.75	2581.76	1661.27	1938.04	3971.31	2291.12		116.796	106.372	115.156	113.112	104.321	120.041	102.935	118.977	117.874	102.719	118.83	118.735	103.599		112.267	6.80874	318
2417.12	2490.63	1971.44	1763.14	2727.89	1933.75	2492.52	1949.55	2589.31	1642.7	1930.79	3982.36	2284.28		117.017	106.637	115.483	112.438	104.008	121.041	102.932	119.887	118.218	101.571	118.386	119.065	103.289		112.306	7.17414	319
2422.55	2487.62	1974.87	1766.81	2731.18	1918.31	2488.47	1947.51	2597.46	1647.6	1935.09	3977.16	2289.76		117.28	106.508	115.684	112.672	104.134	120.074	102.765	119.761	118.59	101.874	118.649	118.91	103.537		112.341	7.08564	320
2427.62	2488.7	1968.22	1769.25	2716.81	1914.53	2486.68	1937.4	2573.87	1650.21	1934.13	3979.79	2283.89		117.525	106.554	115.294	112.828	103.586	119.837	102.691	119.14	117.513	102.035	118.59	118.988	103.272		112.143	7.01358	321
2412.41	2484.96	1974.32	1767.32	2720.22	1926.82	2484.31	1938.69	2593.77	1644.87	1923.29	3980.62	2266.43		116.789	106.394	115.652	112.705	103.716	120.607	102.593	119.219	118.422	101.705	117.926	119.013	102.482		112.094	7.19776	322
2411.17	2482.79	1966.32	1762.82	2703.51	1926.54	2491.18	1943.5	2579.86	1649.99	1925.06	3984.66	2279.79		116.729	106.301	115.183	112.417	103.079	120.589	102.877	119.515	117.787	102.021	118.034	119.134	103.086		112.058	7.11443	323
2416.53	2489.38	1972.86	1776.39	2709.98	1921.87	2500.03	1938.69	2580.37	1636.62	1924.79	3972.43	2275.46		116.989	106.583	115.566	113.283	103.325	120.297	103.242	119.219	117.81	101.195	118.018	118.768	102.89		112.091	7.10859	324
2419.55	2462.5	1969.8	1757.83	2708.59	1918.2	2487.3	1935.6	2591.53	1631.33	1925.71	3965.19	2276.77		117.135	105.432	115.387	112.099	103.273	120.067	102.717	119.029	118.32	100.868	118.074	118.552	102.95		111.839	7.2487	325
2421.58	2472.93	1970.8	1762.79	2716.03	1935.46	2479.25	1920.15	2584.56	1641.37	1943.38	3977.78	2275.85		117.233	105.879	115.445	112.416	103.556	121.148	102.384	118.079	118.001	101.489	119.158	118.928	102.908		112.048	7.28363	326
2403.75	2470.76	1964.77	1743.26	2701.22	1917.19	2478.26	1936.64	2590.88	1631.01	1933.17	3982.87	2277.2		116.369	105.786	115.092	111.17	102.991	120.004	102.343	119.093	118.29	100.848	118.532	119.08	102.969		111.736	7.30709	327
2416.51	2483.56	1977.04	1746.98	2705.99	1908.92	2478.11	1914.17	2585.9	1635.34	1933.53	3975.85	2279.53		116.987	106.334	115.811	111.407	103.173	119.486	102.337	117.711	118.063	101.116	118.554	118.87	103.074		111.763	7.10422	328
2423.55	2466.55	1965.59	1758.89	2713.37	1931.54	2476.7	1919.8	2593.69	1627.73	1933.74	3975.94	2277.36		117.328	105.605	115.14	112.167	103.455	120.902	102.279	118.057	118.418	100.645	118.566	118.873	102.976		111.878	7.36075	329
2412.19	2477.78	1956.06	1755.13	2705.37	1932.58	2471	1922.28	2580.83	1641.19	1939.47	3979.54	2279.82		116.778	106.087	114.581	111.927	103.15	120.967	102.043	118.21	117.831	101.477	118.918	118.981	103.088		111.849	7.2396	330
2400.67	2466.48	1955.23	1759.44	2702.77	1916.57	2453.56	1914.46	2573.96	1617.79	1919.99	3982.69	2270.97		116.22	105.603	114.533	112.202	103.051	119.965	101.323	117.729	117.517	100.03	117.724	119.075	102.688		111.358	7.30357	331
2416.55	2468.07	1967.46	1755.49	2699.51	1921.74	2472.61	1916.01	2576.18	1640.82	1928.6	3975.58	2266.68		116.989	105.671	115.249	111.95	102.926	120.289	102.11	117.824	117.619	101.455	118.251	118.862	102.494		111.668	7.21209	332
2423.34	2467.12	1947.95	1757.81	2703.43	1915.93	2466.15	1924.74	2575.89	1644.47	1929.75	3977.82	2274.65		117.318	105.63	114.107	112.098	103.076	119.925	101.843	118.361	117.605	101.68	118.322	118.929	102.854		111.673	7.16596	333
2410.51	2468.02	1962.24	1760.93	2701.14	1914.89	2464.36	1907.04	2580.81	1630.04	1928.18	3981.54	2269.87		116.697	105.669	114.944	112.297	102.988	119.86	101.769	117.273	117.83	100.788	118.225	119.041	102.637		111.54	7.22873	334
2407.48	2466.54	1960.22	1751.02	2703.39	1908.22	2466.72	1909.59	2572.21	1627.05	1938.13	3974.89	2279.03		116.55	105.605	114.826	111.665	103.074	119.443	101.867	117.43	117.438	100.603	118.836	118.842	103.052		111.479	7.16004	335
2417.84	2467.43	1961.44	1765.6	2696.14	1922.83	2462.72	1911.15	2597.26	1621.8	1927.39	3965.01	2261.63		117.052	105.643	114.897	112.595	102.798	120.357	101.701	117.525	118.581	100.278	118.177	118.547	102.265		111.57	7.44146	336
2392.09	2465.27	1962.22	1746.44	2690.31	1915.19	2465.97	1906.6	2576.29	1616.13	1927.53	3970.77	2257.56		115.805	105.551	114.943	111.373	102.575	119.879	101.836	117.246	117.624	99.9279	118.186	118.718	102.081		111.211	7.327	337
2408.79	2469.29	1952.93	1750.33	2698.25	1924.29	2466.85	1913.28	2583.18	1632	1918.1	3966.5	2258.26		116.614	105.723	114.398	111.621	102.878	120.448	101.872	117.657	117.938	100.909	117.608	118.591	102.112		111.413	7.244	338
2407.09	2442.34	1961.4	1749.77	2684.79	1922.69	2461.87	1894.24	2580.15	1610.54	1929.6	3968.62	2257.34		116.532	104.569	114.895	111.586	102.365	120.349	101.666	116.486	117.8	99.5822	118.313	118.654	102.071		111.144	7.51794	339
2410.77	2462	1943.43	1739.09	2682.07	1910.57	2452.38	1915.13	2573.54	1618.67	1931.55	3966.09	2270.8		116.709	105.411	113.842	110.904	102.261	119.59	101.274	117.77	117.498	100.085	118.432	118.579	102.68		111.157	7.36647	340
2388.24	2459.7	1966.84	1755	2686.22	1918.48	2447.75	1896.58	2578.34	1623.35	1935.96	3984.42	2261.92		115.619	105.312	115.213	111.919	102.42	120.085	101.083	116.629	117.718	100.374	118.702	119.127	102.278		111.268	7.42666	341
2404.45	2471.56	1946.59	1751.5	2685.28	1903.31	2458.37	1914.08	2574.61	1628.04	1929.79	3974.79	2249.13		116.404	105.82	114.027	111.696	102.384	119.135	101.522	117.705	117.547	100.665	118.325	118.839	101.7		111.213	7.29378	342
2401.22	2449.51	1948.56	1748.63	2679.85	1902.05	2434.57	1910.3	2579.13	1624.14	1934.01	3962.01	2245.77		116.247	104.876	114.142	111.513	102.177	119.057	100.539	117.473	117.753	100.423	118.583	118.457	101.548		110.984	7.48936	343
2405.79	2456.74	1939.93	1738.51	2687.51	1916.53	2444.71	1913.48	2570.25	1621.04	1940.1	3976.41	2254.7		116.469	105.186	113.637	110.868	102.469	119.963	100.958	117.669	117.348	100.232	118.957	118.887	101.952		111.122	7.50671	344
2408.16	2456.14	1941.47	1737.82	2677.72	1922.22	2447.11	1896.93	2577.43	1624.7	1926.13	3970.68	2256.1		116.583	105.16	113.727	110.823	102.095	120.319	101.057	116.651	117.676	100.458	118.1	118.716	102.015		111.029	7.42161	345
2407.97	2449.57	1956.85	1754.79	2659.96	1929.08	2470.34	1886.92	2574.31	1609.76	1912.43	3983.59	2249.97		116.574	104.879	114.628	111.906	101.418	120.748	102.016	116.036	117.533	99.5338	117.26	119.102	101.738		111.028	7.54566	346
2409.46	2462.4	1951.38	1746.49	2670.77	1923.28	2446.75	1888.32	2585.02	1620.32	1923.67	3967.16	2253.37		116.646	105.428	114.307	111.376	101.831	120.385	101.042	116.121	118.022	100.187	117.949	118.611	101.891		111.061	7.47779	347
2393.92	2457.85	1950.79	1745.95	2662.91	1928.33	2439.25	1889.15	2579.03	1618.44	1930.21	3962.88	2244.82		115.894	105.233	114.273	111.342	101.531	120.701	100.732	116.172	117.749	100.071	118.35	118.483	101.505		110.926	7.5909	348
2415.28	2457.88	1951.71	1746.97	2677.75	1928.09	2465.86	1890.52	2577.51	1633.72	1923.61	3980.56	2243.41		116.928	105.235	114.327	111.407	102.097	120.686	101.831	116.257	117.68	101.016	117.946	119.011	101.441		111.22	7.40001	349
2396.17	2439.64	1956.68	1745.17	2662.28	1924.66	2459.2	1892.68	2575.48	1626.29	1935.84	3967.99	2235.74		116.003	104.453	114.618	111.292	101.507	120.472	101.556	116.39	117.587	100.556	118.695	118.636	101.094		110.989	7.58151	350
2404.98	2459.99	1948.44	1738.82	2677.01	1932.92	2449.93	1900.48	2574.28	1615.43	1923.03	3965.44	2238.91		116.429	105.325	114.136	110.887	102.069	120.989	101.173	116.869	117.532	99.8844	117.91	118.559	101.238		111	7.58793	351
2411.4	2451.97	1950.04	1740.03	2661.69	1907.96	2421.53	1884.32	2583.58	1627.05	1925.23	3965.98	2254.12		116.74	104.981	114.229	110.964	101.484	119.426	100	115.876	117.957	100.603	118.045	118.576	101.926		110.831	7.50073	352
2410.03	2448.1	1962.62	1729.99	2665.85	1916.53	2450.94	1891.54	2584.95	1632.65	1927.08	3963.04	2244.83		116.674	104.816	114.966	110.324	101.643	119.963	101.215	116.319	118.019	100.95	118.158	118.487	101.505		111.003	7.47454	353
2401.94	2440.67	1955.97	1741.08	2668.96	1919.28	2445.81	1879.45	2587.16	1625.11	1936.68	3975.62	2244.39		116.282	104.498	114.576	111.031	101.762	120.135	101.003	115.576	118.12	100.483	118.747	118.864	101.485		110.966	7.57676	354
2406.59	2445.84	1944.54	1736.06	2658.73	1924.35	2454.45	1871.87	2590.47	1624.6	1924.65	3980.1	2236.11		116.507	104.719	113.907	110.711	101.371	120.452	101.36	115.11	118.271	100.452	118.009	118.998	101.111		110.844	7.56968	355
2404.76	2445.33	1947.39	1742.39	2668.59	1921.14	2440.09	1878.95	2580.96	1626.77	1920.98	3972.25	2245.02		116.419	104.697	114.074	111.115	101.747	120.251	100.767	115.545	117.837	100.586	117.784	118.763	101.514		110.854	7.47467	356
2400.97	2453.32	1939.59	1728.2	2654.31	1910.48	2445.32	1870.5	2585.32	1619.82	1923.92	3968.7	2233.98		116.235	105.039	113.617	110.21	101.203	119.584	100.983	115.026	118.036	100.156	117.965	118.657	101.015		110.594	7.48551	357
2394.77	2446.4	1941.4	1729.55	2649.49	1923.02	2437.71	1884.1	2588.17	1624.41	1926.54	3974.44	2238.84		115.935	104.743	113.723	110.296	101.019	120.369	100.668	115.862	118.166	100.44	118.125	118.829	101.234		110.724	7.63847	358
2412.19	2456.07	1941.3	1736.17	2646.96	1914.46	2444.61	1875.66	2584.26	1621.56	1929.11	3985.73	2244.5		116.778	105.157	113.717	110.718	100.923	119.833	100.954	115.343	117.988	100.264	118.283	119.166	101.491		110.816	7.58621	359
2400.16	2437.03	1946.34	1742.96	2653.01	1932.22	2451.45	1869.16	2567.5	1620.26	1922.01	3976.35	2228.54		116.196	104.342	114.013	111.151	101.154	120.945	101.236	114.943	117.223	100.184	117.848	118.885	100.769		110.684	7.62248	360
2386.23	2435.23	1943.32	1728.51	2633.14	1918.87	2437.2	1859.49	2586.97	1629.18	1925.51	3978.71	2234.04		115.522	104.265	113.835	110.23	100.396	120.109	100.647	114.349	118.111	100.735	118.062	118.956	101.017		110.48	7.61328	361
2392.35	2448.5	1935.52	1730	2649.22	1911.16	2439.64	1870.36	2580.13	1623.74	1925.73	3964.43	2234.33		115.818	104.833	113.379	110.324	101.009	119.627	100.748	115.017	117.799	100.399	118.076	118.529	101.031		110.507	7.46496	362
2406.02	2439.77	1942.7	1728.34	2645.13	1910.83	2444.44	1866.42	2578.43	1637.91	1930.84	3979.35	2221.66		116.48	104.459	113.799	110.219	100.853	119.606	100.947	114.775	117.721	101.275	118.388	118.975	100.458		110.612	7.54845	363
2398.83	2428.73	1942.53	1719.66	2664.01	1914.6	2436.12	1872.94	2582.65	1614.77	1929.58	3977.76	2232.54		116.131	103.987	113.789	109.665	101.573	119.842	100.603	115.176	117.914	99.844	118.311	118.928	100.95		110.516	7.66709	364
2387.83	2446.21	1939.43	1734.86	2642.67	1919.35	2440.07	1878.69	2571.45	1610.91	1929.42	3976.69	2232.76		115.599	104.735	113.607	110.635	100.759	120.139	100.766	115.53	117.403	99.6052	118.301	118.896	100.96		110.533	7.67344	365
2399.29	2431.38	1935.28	1726.71	2647.24	1915.54	2428.26	1877.11	2568.92	1614.76	1931.64	3974.71	2222.25		116.154	104.1	113.364	110.115	100.933	119.901	100.278	115.432	117.287	99.8435	118.438	118.836	100.484		110.397	7.75738	366
2397.76	2443.81	1930.02	1725.34	2653.93	1913.07	2418.85	1866.78	2569.72	1615.42	1932.08	3981.88	2232.19		116.08	104.632	113.056	110.028	101.188	119.746	99.8895	114.797	117.324	99.8841	118.464	119.051	100.934		110.39	7.65975	367
2396.21	2422.92	1935.47	1726.33	2653.69	1911.29	2423.35	1858.27	2574.64	1611.6	1940.06	3961.72	2224.88		116.005	103.738	113.376	110.091	101.179	119.635	100.076	114.274	117.548	99.6477	118.954	118.448	100.603		110.275	7.73141	368
2390.8	2436.23	1943.93	1721.52	2637.25	1912.5	2421.02	1860.53	2572.08	1611.74	1922.42	3967.36	2228.18		115.743	104.308	113.871	109.784	100.552	119.711	99.9793	114.412	117.432	99.6562	117.873	118.617	100.753		110.207	7.68243	369
2399.37	2438.75	1932.17	1728.66	2643.83	1909.31	2430.29	1867.6	2587.42	1609.78	1911.59	3973.62	2226.6		116.158	104.415	113.182	110.239	100.803	119.511	100.362	114.847	118.132	99.5352	117.209	118.804	100.681		110.298	7.65362	370
2389.09	2439.46	1944.75	1737.64	2644.14	1913.43	2422.24	1865.67	2574.17	1609.82	1930.19	3973.11	2229.91		115.66	104.446	113.919	110.812	100.815	119.769	100.03	114.729	117.527	99.5378	118.349	118.789	100.831		110.401	7.72368	371
2401.72	2434.54	1931.22	1742.73	2639.03	1917.44	2411.87	1860.92	2560	1614.12	1929.73	3973.17	2220.03		116.271	104.235	113.127	111.136	100.62	120.02	99.6013	114.437	116.88	99.8035	118.321	118.79	100.384		110.279	7.79097	372
2384.82	2416.29	1942.23	1726.57	2632.77	1907.2	2416.16	1859.06	2571.42	1615.94	1928.48	3970.18	2229.02		115.454	103.454	113.772	110.106	100.382	119.379	99.7787	114.322	117.401	99.9162	118.244	118.701	100.79		110.131	7.72203	373
2395.75	2418.43	1918.12	1733.12	2639.42	1902.47	2408.78	1843.77	2568.35	1609.23	1925.69	3976.75	2229.32		115.982	103.545	112.359	110.524	100.635	119.082	99.4738	113.382	117.261	99.5011	118.073	118.898	100.804		109.963	7.68392	374
2394.22	2410.94	1936.32	1725.46	2642.2	1921.97	2419.13	1864.74	2571.97	1600.32	1921.83	3977.59	2238.58		115.908	103.225	113.425	110.035	100.741	120.303	99.9015	114.672	117.427	98.9506	117.837	118.923	101.223		110.198	7.85951	375
2400.47	2426.25	1930.87	1723.19	2640.67	1915.09	2409.46	1853.76	2561.91	1607.3	1937.14	3972.59	2221.41		116.211	103.88	113.106	109.89	100.683	119.872	99.5018	113.996	116.967	99.3821	118.775	118.773	100.446		110.114	7.85686	376
2397.9	2438.44	1940.97	1723.17	2637.77	1914.04	2403.08	1860.38	2577.47	1612.63	1928.55	3981.13	2217.4		116.087	104.402	113.698	109.889	100.572	119.807	99.2384	114.403	117.677	99.7118	118.249	119.028	100.265		110.233	7.89708	377
2388.15	2426.82	1929.94	1723.07	2642.41	1918.56	2400.41	1854.29	2577.24	1610.15	1946.66	3972.25	2219.83		115.615	103.905	113.052	109.883	100.749	120.09	99.1283	114.029	117.667	99.5584	119.359	118.763	100.375		110.167	7.96276	378
2393.03	2434.41	1924.64	1719.93	2634.8	1922.04	2415.26	1849.43	2573.75	1609.6	1931.96	3970.09	2216.75		115.851	104.23	112.741	109.683	100.459	120.308	99.7414	113.73	117.508	99.524	118.457	118.698	100.236		110.09	7.84521	379
2383.05	2426.51	1938.97	1716.8	2626.36	1914.33	2415.81	1841.59	2580.73	1621.7	1915.78	3967.46	2217.65		115.367	103.891	113.58	109.483	100.137	119.825	99.764	113.248	117.826	100.272	117.465	118.62	100.277		109.981	7.69012	380
2393.84	2438.01	1931.87	1711.04	2621.93	1914.79	2408.1	1863.08	2577.54	1614.1	1932.85	3967.13	2213.04		115.89	104.384	113.165	109.116	99.9685	119.854	99.446	114.57	117.681	99.8025	118.512	118.61	100.068		110.082	7.91855	381
2391.52	2425.79	1920.31	1716.04	2629.62	1906.91	2401.96	1854.95	2576.29	1600.7	1938.24	3974.86	2218.24		115.777	103.861	112.488	109.434	100.261	119.361	99.1923	114.07	117.624	98.9739	118.842	118.841	100.303		109.925	7.95859	382
2399.31	2415.81	1921.26	1720.11	2632.3	1911.08	2401.58	1840.71	2575.15	1603.8	1921.3	3979.82	2215.1		116.155	103.433	112.543	109.694	100.364	119.621	99.1764	113.194	117.572	99.1654	117.804	118.989	100.161		109.836	7.90924	383
2394.92	2416.79	1924.03	1716.36	2629.69	1908.78	2403.16	1850.67	2569.98	1613.34	1934.5	3971.37	2223.66		115.942	103.475	112.705	109.455	100.264	119.477	99.2417	113.807	117.336	99.7556	118.613	118.737	100.548		109.951	7.83933	384
2375.05	2432.42	1910.96	1720.61	2632.48	1917.63	2406.83	1858.61	2573.75	1598.71	1929.11	3967.7	2213.36		114.98	104.144	111.94	109.726	100.371	120.031	99.3934	114.294	117.508	98.851	118.282	118.627	100.082		109.864	7.88882	385
2390.53	2411.73	1900.21	1714.36	2636.6	1914.12	2411.87	1841.8	2585.39	1611.57	1928.16	3981.94	2210.19		115.73	103.259	111.31	109.327	100.528	119.812	99.6016	113.261	118.039	99.6458	118.225	119.053	99.939		109.825	7.88118	386
2392.04	2417.86	1910.47	1716.42	2614.44	1910.76	2405.66	1851.15	2580.21	1604.12	1915.87	3967	2206.78		115.803	103.521	111.911	109.459	99.6827	119.602	99.345	113.836	117.803	99.1851	117.471	118.606	99.7847		109.693	7.92912	387
2410.87	2418.87	1911.47	1709.29	2616.62	1903.38	2407.58	1835.17	2576.88	1607.65	1923.28	3973.01	2214.17		116.715	103.564	111.97	109.004	99.766	119.14	99.4241	112.853	117.651	99.4035	117.925	118.785	100.119		109.717	7.87908	388
2375.4	2407.45	1920	1707.36	2624.41	1907.03	2406.27	1839.92	2574.71	1600.57	1927.45	3974.22	2209.24		114.997	103.075	112.469	108.881	100.063	119.368	99.3701	113.145	117.552	98.9658	118.181	118.822	99.8959		109.599	7.9091	389
