# Supplementary material for: A mechano-osmotic feedback couples cell volume to the rate of cell deformation
Source: eLife journal article supplement (doi:10.7554/elife.72381), 2022-04-13
Supplement: supp [file 2.01.xlsx]

## Sheet: Sheet1
ID	lineage	Frame	Cell_Intensisty			lineage	Frame
Stack1-100.tif	1	1	2270.91			1	1
Stack1-100.tif	1	2	2259.26			2	1
Stack1-100.tif	1	3	2274.34			3	1
Stack1-100.tif	1	4	2289.31			4	1
Stack1-100.tif	1	5	2273.29			5	1
Stack1-100.tif	1	6	2268.47			6	1
Stack1-100.tif	1	7	2286.82			7	1
Stack1-100.tif	1	8	2276.44			8	1
Stack1-100.tif	1	9	2297.72			9	1
Stack1-100.tif	1	10	2289.49			10	1
Stack1-100.tif	1	11	2294.24			11	1
Stack1-100.tif	1	12	2279.55			12	1
Stack1-100.tif	1	13	2276.76			13	1
Stack1-100.tif	1	14	2296.07			14	1
Stack1-100.tif	1	15	2268.69			15	1
Stack1-100.tif	1	16	2297			16	1
Stack1-100.tif	1	17	2298.94			17	1
Stack1-100.tif	1	18	2293.64			18	1
Stack1-100.tif	1	19	2287.63			19	1
Stack1-100.tif	1	20	2292.98			1	2
Stack1-100.tif	1	21	2313.44			2	2
Stack1-100.tif	1	22	2299.35			3	2
Stack1-100.tif	1	23	2314.34			4	2
Stack1-100.tif	1	24	1487.05			5	2
Stack1-100.tif	1	25	2333.05			6	2
Stack1-100.tif	1	26	1032.49			7	2
Stack1-100.tif	1	27	-152.024			8	2
Stack1-100.tif	1	28	398.869			9	2
Stack1-100.tif	1	29	2388.51			10	2
Stack1-100.tif	1	30	2363.15			11	2
Stack1-100.tif	1	31	2343.14			12	2
Stack1-100.tif	1	32	2341.02			13	2
Stack1-100.tif	1	33	2358.28			14	2
Stack1-100.tif	1	34	2348.52			15	2
Stack1-100.tif	1	35	2337.45			16	2
Stack1-100.tif	1	36	2110.29			17	2
Stack1-100.tif	1	37	400.233			18	2
Stack1-100.tif	1	38	2282.18			19	2
Stack1-100.tif	1	39	2345.91			1	3
Stack1-100.tif	1	40	2367.5			2	3
Stack1-100.tif	1	41	2368			3	3
Stack1-100.tif	1	42	2357.35			4	3
Stack1-100.tif	1	43	2347.26			5	3
Stack1-100.tif	1	44	2356.79			6	3
Stack1-100.tif	1	45	2359.07			7	3
Stack1-100.tif	1	46	2351.51			8	3
Stack1-100.tif	1	47	2346.04			9	3
Stack1-100.tif	1	48	2367.44			10	3
Stack1-100.tif	1	49	2359.07			11	3
Stack1-100.tif	1	50	2364.36			12	3
Stack1-100.tif	1	51	2357.99			13	3
Stack1-100.tif	1	52	2358.28			14	3
Stack1-100.tif	1	53	2371.44			15	3
Stack1-100.tif	1	54	1367.33			16	3
Stack1-100.tif	1	55	426.607			17	3
Stack1-100.tif	1	56	2216.79			18	3
Stack1-100.tif	1	57	2341.48			19	3
Stack1-100.tif	1	58	2330.29			1	4
Stack1-100.tif	1	59	2318.27			2	4
Stack1-100.tif	1	60	2328.16			3	4
Stack1-100.tif	1	61	2328.53			4	4
Stack1-100.tif	1	62	2340.44			5	4
Stack1-100.tif	1	63	2326.74			6	4
Stack1-100.tif	1	64	2336.44			7	4
Stack1-100.tif	1	65	2330.79			8	4
Stack1-100.tif	1	66	2338.25			9	4
Stack1-100.tif	1	67	2331.03			10	4
Stack1-100.tif	1	68	2328.09			11	4
Stack1-100.tif	1	69	2329.02			12	4
Stack1-100.tif	1	70	2336.66			13	4
Stack1-100.tif	1	71	2348.85			14	4
Stack1-100.tif	1	72	2349.21			15	4
Stack1-100.tif	1	73	2338.78			16	4
Stack1-100.tif	1	74	2726.6			17	4
Stack1-100.tif	1	75	2343.57			18	4
Stack1-100.tif	1	76	2393.42			19	4
Stack1-100.tif	1	77	2352.15			1	5
Stack1-100.tif	1	78	2373.68			2	5
Stack1-100.tif	1	79	2368.39			3	5
Stack1-100.tif	1	80	2401.5			4	5
Stack1-100.tif	1	81	2397.71			5	5
Stack1-100.tif	1	82	2412.43			6	5
Stack1-100.tif	1	83	2451.99			7	5
Stack1-100.tif	1	84	2467.41			8	5
Stack1-100.tif	1	85	2488.97			9	5
Stack1-100.tif	1	86	2505.52			10	5
Stack1-100.tif	1	87	2539.57			11	5
Stack1-100.tif	1	88	2542.38			12	5
Stack1-100.tif	1	89	2574.35			13	5
Stack1-100.tif	1	90	2596.09			14	5
Stack1-100.tif	1	91	2603.78			15	5
Stack1-100.tif	1	92	2621.69			16	5
Stack1-100.tif	1	93	2642.91			17	5
Stack1-100.tif	1	94	2675.03			18	5
Stack1-100.tif	1	95	2684.23			19	5
Stack1-100.tif	1	96	2708.79			1	6
Stack1-100.tif	1	97	2717.51			2	6
Stack1-100.tif	1	98	2657.02			3	6
Stack1-100.tif	1	99	2756.88			4	6
Stack1-100.tif	1	100	2754.77			5	6
Stack101-200.tif	1	101	2798.24			6	6
Stack101-200.tif	1	102	2787.07			7	6
Stack101-200.tif	1	103	2812.34			8	6
Stack101-200.tif	1	104	2818.45			9	6
Stack101-200.tif	1	105	2836.05			10	6
Stack101-200.tif	1	106	2842.76			11	6
Stack101-200.tif	1	107	2868.18			12	6
Stack101-200.tif	1	108	2874.36			13	6
Stack101-200.tif	1	109	2883.19			14	6
Stack101-200.tif	1	110	2897.54			15	6
Stack101-200.tif	1	111	2922.56			16	6
Stack101-200.tif	1	112	2944.98			17	6
Stack101-200.tif	1	113	2947			18	6
Stack101-200.tif	1	114	2966.26			19	6
Stack101-200.tif	1	115	2974.71			1	7
Stack101-200.tif	1	116	2990.38			2	7
Stack101-200.tif	1	117	2999.09			3	7
Stack101-200.tif	1	118	3005.74			4	7
Stack101-200.tif	1	119	3005.94			5	7
Stack101-200.tif	1	120	3020.39			6	7
Stack101-200.tif	1	121	3025.66			7	7
Stack101-200.tif	1	122	3028.84			8	7
Stack101-200.tif	1	123	3042.49			9	7
Stack101-200.tif	1	124	3055.63			10	7
Stack101-200.tif	1	125	3059.47			11	7
Stack101-200.tif	1	126	3058.41			12	7
Stack101-200.tif	1	127	3068.36			13	7
Stack101-200.tif	1	128	3081.77			14	7
Stack101-200.tif	1	129	3075.56			15	7
Stack101-200.tif	1	130	3091.19			16	7
Stack101-200.tif	1	131	3089.58			17	7
Stack101-200.tif	1	132	3078.17			18	7
Stack101-200.tif	1	133	3097.44			19	7
Stack101-200.tif	1	134	3106.12			1	8
Stack101-200.tif	1	135	3109.61			2	8
Stack101-200.tif	1	136	3119.6			3	8
Stack101-200.tif	1	137	3129.19			4	8
Stack101-200.tif	1	138	3126.09			5	8
Stack101-200.tif	1	139	3122.82			6	8
Stack101-200.tif	1	140	3139.47			7	8
Stack101-200.tif	1	141	3133.97			8	8
Stack101-200.tif	1	142	3133.42			9	8
Stack101-200.tif	1	143	3129.04			10	8
Stack101-200.tif	1	144	3144.91			11	8
Stack101-200.tif	1	145	3149.69			12	8
Stack101-200.tif	1	146	3142.98			13	8
Stack101-200.tif	1	147	3151.11			14	8
Stack101-200.tif	1	148	3175.01			15	8
Stack101-200.tif	1	149	3169.03			16	8
Stack101-200.tif	1	150	3179.06			17	8
Stack101-200.tif	1	151	3170.34			18	8
Stack101-200.tif	1	152	3174.33			19	8
Stack101-200.tif	1	153	3171.88			1	9
Stack101-200.tif	1	154	3189.36			2	9
Stack101-200.tif	1	155	3204.58			3	9
Stack101-200.tif	1	156	3185.93			4	9
Stack101-200.tif	1	157	3189.79			5	9
Stack101-200.tif	1	158	3203.6			6	9
Stack101-200.tif	1	159	3217.19			7	9
Stack101-200.tif	1	160	3201.42			8	9
Stack101-200.tif	1	161	3207.05			9	9
Stack101-200.tif	1	162	3218.8			10	9
Stack101-200.tif	1	163	3218.87			11	9
Stack101-200.tif	1	164	3218.89			12	9
Stack101-200.tif	1	165	3223.77			13	9
Stack101-200.tif	1	166	3235.86			14	9
Stack101-200.tif	1	167	3226.83			15	9
Stack101-200.tif	1	168	3238.86			16	9
Stack101-200.tif	1	169	3229.14			17	9
Stack101-200.tif	1	170	3250.71			18	9
Stack101-200.tif	1	171	3250.3			19	9
Stack101-200.tif	1	172	3264.39			1	10
Stack101-200.tif	1	173	3263.07			2	10
Stack101-200.tif	1	174	3248.04			3	10
Stack101-200.tif	1	175	3266.89			4	10
Stack101-200.tif	1	176	3272.17			5	10
Stack101-200.tif	1	177	3282.7			6	10
Stack101-200.tif	1	178	3278.68			7	10
Stack101-200.tif	1	179	3279.42			8	10
Stack101-200.tif	1	180	3291.3			9	10
Stack101-200.tif	1	181	3286.87			10	10
Stack101-200.tif	1	182	3298.45			11	10
Stack101-200.tif	1	183	3297.36			12	10
Stack101-200.tif	1	184	3305.98			13	10
Stack101-200.tif	1	185	3308.86			14	10
Stack101-200.tif	1	186	3311.47			15	10
Stack101-200.tif	1	187	3315.53			16	10
Stack101-200.tif	1	188	3312.74			17	10
Stack101-200.tif	1	189	3318.71			18	10
Stack101-200.tif	1	190	3327.68			19	10
Stack101-200.tif	1	191	3330.17			1	11
Stack101-200.tif	1	192	3320.64			2	11
Stack101-200.tif	1	193	3329.51			3	11
Stack101-200.tif	1	194	3323.25			4	11
Stack101-200.tif	1	195	3325.94			5	11
Stack101-200.tif	1	196	3336.55			6	11
Stack101-200.tif	1	197	3343.34			7	11
Stack101-200.tif	1	198	3343.89			8	11
Stack101-200.tif	1	199	3335.27			9	11
Stack101-200.tif	1	200	3350.44			10	11
Stack201-300.tif	1	201	3340.11			11	11
Stack201-300.tif	1	202	3348.34			12	11
Stack201-300.tif	1	203	3346.74			13	11
Stack201-300.tif	1	204	3354.36			14	11
Stack201-300.tif	1	205	3351.92			15	11
Stack201-300.tif	1	206	3344.26			16	11
Stack201-300.tif	1	207	3359.46			17	11
Stack201-300.tif	1	208	3359.14			18	11
Stack201-300.tif	1	209	3344.69			19	11
Stack201-300.tif	1	210	3360.88			1	12
Stack201-300.tif	1	211	3374.58			2	12
Stack201-300.tif	1	212	3362.79			3	12
Stack201-300.tif	1	213	3362.88			4	12
Stack201-300.tif	1	214	3370.28			5	12
Stack201-300.tif	1	215	3366.42			6	12
Stack201-300.tif	1	216	3368.62			7	12
Stack201-300.tif	1	217	3365.08			8	12
Stack201-300.tif	1	218	3382.7			9	12
Stack201-300.tif	1	219	3359.44			10	12
Stack201-300.tif	1	220	3368.97			11	12
Stack201-300.tif	1	221	3377			12	12
Stack201-300.tif	1	222	3378.12			13	12
Stack201-300.tif	1	223	3378.15			14	12
Stack201-300.tif	1	224	3372.06			15	12
Stack201-300.tif	1	225	3367.71			16	12
Stack201-300.tif	1	226	3383.99			17	12
Stack201-300.tif	1	227	3372.24			18	12
Stack201-300.tif	1	228	3375.82			19	12
Stack201-300.tif	1	229	3375.42			1	13
Stack201-300.tif	1	230	3378.01			2	13
Stack201-300.tif	1	231	3375.78			3	13
Stack201-300.tif	1	232	3372.56			4	13
Stack201-300.tif	1	233	3374.97			5	13
Stack201-300.tif	1	234	3380.77			6	13
Stack201-300.tif	1	235	3379.33			7	13
Stack201-300.tif	1	236	3391.32			8	13
Stack201-300.tif	1	237	3379.91			9	13
Stack201-300.tif	1	238	3375.09			10	13
Stack201-300.tif	1	239	3381.11			11	13
Stack201-300.tif	1	240	3381.33			12	13
Stack201-300.tif	1	241	3379.34			13	13
Stack201-300.tif	1	242	3379.66			14	13
Stack201-300.tif	1	243	3375.34			15	13
Stack201-300.tif	1	244	3376.5			16	13
Stack201-300.tif	1	245	3373.89			17	13
Stack201-300.tif	1	246	3376.79			18	13
Stack201-300.tif	1	247	3374.26			19	13
Stack201-300.tif	1	248	3378.29			1	14
Stack201-300.tif	1	249	3384.55			2	14
Stack201-300.tif	1	250	3380.22			3	14
Stack201-300.tif	1	251	3397.07			4	14
Stack201-300.tif	1	252	3382.83			5	14
Stack201-300.tif	1	253	3378.35			6	14
Stack201-300.tif	1	254	3381.01			7	14
Stack201-300.tif	1	255	3378.11			8	14
Stack201-300.tif	1	256	3385.85			9	14
Stack201-300.tif	1	257	3382.94			10	14
Stack201-300.tif	1	258	3378.67			11	14
Stack201-300.tif	1	259	3376.94			12	14
Stack201-300.tif	1	260	3381.72			13	14
Stack201-300.tif	1	261	3386.11			14	14
Stack201-300.tif	1	262	3378.46			15	14
Stack201-300.tif	1	263	3381.88			16	14
Stack201-300.tif	1	264	3384.45			17	14
Stack201-300.tif	1	265	3369.46			18	14
Stack201-300.tif	1	266	3366.19			19	14
Stack201-300.tif	1	267	3363.96			1	15
Stack201-300.tif	1	268	3374.54			2	15
Stack201-300.tif	1	269	3367.72			3	15
Stack201-300.tif	1	270	3364.98			4	15
Stack201-300.tif	1	271	3365.34			5	15
Stack201-300.tif	1	272	3361.34			6	15
Stack201-300.tif	1	273	3362.18			7	15
Stack201-300.tif	1	274	3355.56			8	15
Stack201-300.tif	1	275	3364.46			9	15
Stack201-300.tif	1	276	3362.96			10	15
Stack201-300.tif	1	277	3368.35			11	15
Stack201-300.tif	1	278	3363.12			12	15
Stack201-300.tif	1	279	3379.74			13	15
Stack201-300.tif	1	280	3363.08			14	15
Stack201-300.tif	1	281	3362.54			15	15
Stack201-300.tif	1	282	3364.62			16	15
Stack201-300.tif	1	283	3362.68			17	15
Stack201-300.tif	1	284	3366.32			18	15
Stack201-300.tif	1	285	3368.47			19	15
Stack201-300.tif	1	286	3352.91			1	16
Stack201-300.tif	1	287	3362.92			2	16
Stack201-300.tif	1	288	3353.98			3	16
Stack201-300.tif	1	289	3361.17			4	16
Stack201-300.tif	1	290	3353.75			5	16
Stack201-300.tif	1	291	3338.74			6	16
Stack201-300.tif	1	292	3361.49			7	16
Stack201-300.tif	1	293	3350.26			8	16
Stack201-300.tif	1	294	3349.66			9	16
Stack201-300.tif	1	295	3344.78			10	16
Stack201-300.tif	1	296	3327.41			11	16
Stack201-300.tif	1	297	3353.16			12	16
Stack201-300.tif	1	298	3354.95			13	16
Stack201-300.tif	1	299	3352.32			14	16
Stack201-300.tif	1	300	3333.19			15	16
Stack301-419.tif	1	301	3334.04			16	16
Stack301-419.tif	1	302	3345.89			17	16
Stack301-419.tif	1	303	3334.26			18	16
Stack301-419.tif	1	304	3332.41			19	16
Stack301-419.tif	1	305	3328.05			1	17
Stack301-419.tif	1	306	3325.93			2	17
Stack301-419.tif	1	307	3339.76			3	17
Stack301-419.tif	1	308	3329.89			4	17
Stack301-419.tif	1	309	3328.66			5	17
Stack301-419.tif	1	310	3332.63			6	17
Stack301-419.tif	1	311	3330.56			7	17
Stack301-419.tif	1	312	3326.08			8	17
Stack301-419.tif	1	313	3328.65			9	17
Stack301-419.tif	1	314	3328.82			10	17
Stack301-419.tif	1	315	3331.7			11	17
Stack301-419.tif	1	316	3330.19			12	17
Stack301-419.tif	1	317	3325.17			13	17
Stack301-419.tif	1	318	3328.01			14	17
Stack301-419.tif	1	319	3315.19			15	17
Stack301-419.tif	1	320	3327.92			16	17
Stack301-419.tif	1	321	3312.65			17	17
Stack301-419.tif	1	322	3319.24			18	17
Stack301-419.tif	1	323	3304.94			19	17
Stack301-419.tif	1	324	3306.83			1	18
Stack301-419.tif	1	325	3311.36			2	18
Stack301-419.tif	1	326	3316.07			3	18
Stack301-419.tif	1	327	3317.19			4	18
Stack301-419.tif	1	328	3307.96			5	18
Stack301-419.tif	1	329	3305.35			6	18
Stack301-419.tif	1	330	3306.9			7	18
Stack301-419.tif	1	331	3314.93			8	18
Stack301-419.tif	1	332	3298.7			9	18
Stack301-419.tif	1	333	3304.6			10	18
Stack301-419.tif	1	334	3317.34			11	18
Stack301-419.tif	1	335	3295.87			12	18
Stack301-419.tif	1	336	3301.78			13	18
Stack301-419.tif	1	337	3298.85			14	18
Stack301-419.tif	1	338	3294.21			15	18
Stack301-419.tif	1	339	3283.8			16	18
Stack301-419.tif	1	340	3302.72			17	18
Stack301-419.tif	1	341	3296.3			18	18
Stack301-419.tif	1	342	3277.62			19	18
Stack301-419.tif	1	343	3292.3			1	19
Stack301-419.tif	1	344	3285.36			2	19
Stack301-419.tif	1	345	3296.02			3	19
Stack301-419.tif	1	346	3291.03			4	19
Stack301-419.tif	1	347	3290.76			5	19
Stack301-419.tif	1	348	3290.57			6	19
Stack301-419.tif	1	349	3290.29			7	19
Stack301-419.tif	1	350	3283.76			8	19
Stack301-419.tif	1	351	3264.61			9	19
Stack301-419.tif	1	352	3267.69			10	19
Stack301-419.tif	1	353	3262.73			11	19
Stack301-419.tif	1	354	3280.05			12	19
Stack301-419.tif	1	355	3269.91			13	19
Stack301-419.tif	1	356	3274.5			14	19
Stack301-419.tif	1	357	3278.14			15	19
Stack301-419.tif	1	358	3264.6			16	19
Stack301-419.tif	1	359	3256.98			17	19
Stack301-419.tif	1	360	3270.19			18	19
Stack301-419.tif	1	361	3269.42			19	19
Stack301-419.tif	1	362	3262.49			1	20
Stack301-419.tif	1	363	3254.3			2	20
Stack301-419.tif	1	364	3264.97			3	20
Stack301-419.tif	1	365	3272			4	20
Stack301-419.tif	1	366	3260.6			5	20
Stack301-419.tif	1	367	3254.93			6	20
Stack301-419.tif	1	368	3258.6			7	20
Stack301-419.tif	1	369	3251.4			8	20
Stack301-419.tif	1	370	3261.44			9	20
Stack301-419.tif	1	371	3254.29			10	20
Stack301-419.tif	1	372	3252.74			11	20
Stack301-419.tif	1	373	3249.03			12	20
Stack301-419.tif	1	374	3252.51			13	20
Stack301-419.tif	1	375	3251.31			14	20
Stack301-419.tif	1	376	3250.5			15	20
Stack301-419.tif	1	377	3251.25			16	20
Stack301-419.tif	1	378	3255.23			17	20
Stack301-419.tif	1	379	3253.04			18	20
Stack301-419.tif	1	380	3238.3			19	20
Stack301-419.tif	1	381	3243.73			1	21
Stack301-419.tif	1	382	3235.88			2	21
Stack301-419.tif	1	383	3241.91			3	21
Stack301-419.tif	1	384	3245.73			4	21
Stack301-419.tif	1	385	3230.55			5	21
Stack301-419.tif	1	386	3234.75			6	21
Stack301-419.tif	1	387	3235.64			7	21
Stack301-419.tif	1	388	3236.52			8	21
Stack301-419.tif	1	389	3229.2			9	21
Stack301-419.tif	1	390	3231.89			10	21
Stack301-419.tif	1	391	3243.66			11	21
Stack301-419.tif	1	392	3232.04			12	21
Stack301-419.tif	1	393	3223.58			13	21
Stack301-419.tif	1	394	3234.69			14	21
Stack301-419.tif	1	395	3232.08			15	21
Stack301-419.tif	1	396	3224.16			16	21
Stack301-419.tif	1	397	3233.05			17	21
Stack301-419.tif	1	398	3226.3			18	21
Stack301-419.tif	1	399	3224.62			19	21
Stack301-419.tif	1	400	3222.37			1	22
Stack301-419.tif	1	401	3219.2			2	22
Stack301-419.tif	1	402	3226.43			3	22
Stack301-419.tif	1	403	3215.26			4	22
Stack301-419.tif	1	404	3223.76			5	22
Stack301-419.tif	1	405	3224.94			6	22
Stack301-419.tif	1	406	3221.64			7	22
Stack301-419.tif	1	407	3218.55			8	22
Stack301-419.tif	1	408	3217.53			9	22
Stack301-419.tif	1	409	3215.87			10	22
Stack301-419.tif	1	410	3208.33			11	22
Stack301-419.tif	1	411	3218.55			12	22
Stack301-419.tif	1	412	3202.94			13	22
Stack301-419.tif	1	413	3220.29			14	22
Stack301-419.tif	1	414	3211.23			15	22
Stack301-419.tif	1	415	3203.42			16	22
Stack301-419.tif	1	416	3196.62			17	22
Stack301-419.tif	1	417	3199.88			18	22
Stack301-419.tif	1	418	3211.09			19	22
Stack301-419.tif	1	419	3197.22			1	23
Stack1-100.tif	2	1	1917.85			2	23
Stack1-100.tif	2	2	1900.62			3	23
Stack1-100.tif	2	3	1922.32			4	23
Stack1-100.tif	2	4	1919.66			5	23
Stack1-100.tif	2	5	1915.96			6	23
Stack1-100.tif	2	6	1902.1			7	23
Stack1-100.tif	2	7	1917.9			8	23
Stack1-100.tif	2	8	1918			9	23
Stack1-100.tif	2	9	1918.22			10	23
Stack1-100.tif	2	10	1923.48			11	23
Stack1-100.tif	2	11	1915.56			12	23
Stack1-100.tif	2	12	1907.08			13	23
Stack1-100.tif	2	13	1911.35			14	23
Stack1-100.tif	2	14	1918.53			15	23
Stack1-100.tif	2	15	1927.12			16	23
Stack1-100.tif	2	16	1921.21			17	23
Stack1-100.tif	2	17	1928.58			18	23
Stack1-100.tif	2	18	1923.9			19	23
Stack1-100.tif	2	19	1937.09			1	24
Stack1-100.tif	2	20	1952.35			2	24
Stack1-100.tif	2	21	1946.33			3	24
Stack1-100.tif	2	22	1947.16			4	24
Stack1-100.tif	2	23	1955.41			5	24
Stack1-100.tif	2	24	1380.64			6	24
Stack1-100.tif	2	25	1968.79			7	24
Stack1-100.tif	2	26	1069.85			8	24
Stack1-100.tif	2	27	5.87898			9	24
Stack1-100.tif	2	28	318.51			10	24
Stack1-100.tif	2	29	2012.59			11	24
Stack1-100.tif	2	30	1988.71			12	24
Stack1-100.tif	2	31	1987.09			13	24
Stack1-100.tif	2	32	1952.74			14	24
Stack1-100.tif	2	33	1984.05			15	24
Stack1-100.tif	2	34	1975.47			16	24
Stack1-100.tif	2	35	1987.47			17	24
Stack1-100.tif	2	36	1913.47			18	24
Stack1-100.tif	2	37	443.899			19	24
Stack1-100.tif	2	38	1960.43			1	25
Stack1-100.tif	2	39	1999.22			2	25
Stack1-100.tif	2	40	1995.77			3	25
Stack1-100.tif	2	41	1998.37			4	25
Stack1-100.tif	2	42	1993.62			5	25
Stack1-100.tif	2	43	1987.87			6	25
Stack1-100.tif	2	44	1988.19			7	25
Stack1-100.tif	2	45	1989.36			8	25
Stack1-100.tif	2	46	1999.62			9	25
Stack1-100.tif	2	47	1993.51			10	25
Stack1-100.tif	2	48	2002.91			11	25
Stack1-100.tif	2	49	1988.42			12	25
Stack1-100.tif	2	50	1992.14			13	25
Stack1-100.tif	2	51	2013.17			14	25
Stack1-100.tif	2	52	1993.26			15	25
Stack1-100.tif	2	53	1998.49			16	25
Stack1-100.tif	2	54	1366.82			17	25
Stack1-100.tif	2	55	305.988			18	25
Stack1-100.tif	2	56	1860.88			19	25
Stack1-100.tif	2	57	1963.4			1	26
Stack1-100.tif	2	58	1968.5			2	26
Stack1-100.tif	2	59	1977.16			3	26
Stack1-100.tif	2	60	1944.06			4	26
Stack1-100.tif	2	61	1954.8			5	26
Stack1-100.tif	2	62	1970.77			6	26
Stack1-100.tif	2	63	1952.04			7	26
Stack1-100.tif	2	64	1966.5			8	26
Stack1-100.tif	2	65	1967.23			9	26
Stack1-100.tif	2	66	1976.87			10	26
Stack1-100.tif	2	67	1977.34			11	26
Stack1-100.tif	2	68	1973.49			12	26
Stack1-100.tif	2	69	1973.97			13	26
Stack1-100.tif	2	70	1981.75			14	26
Stack1-100.tif	2	71	1978.28			15	26
Stack1-100.tif	2	72	2963.1			16	26
Stack1-100.tif	2	73	2431.97			17	26
Stack1-100.tif	2	74	1986.59			18	26
Stack1-100.tif	2	75	1985.82			19	26
Stack1-100.tif	2	76	1963.55			1	27
Stack1-100.tif	2	77	1964.57			2	27
Stack1-100.tif	2	78	1978.1			3	27
Stack1-100.tif	2	79	1982.79			4	27
Stack1-100.tif	2	80	1990.01			5	27
Stack1-100.tif	2	81	2017.8			6	27
Stack1-100.tif	2	82	2006.18			7	27
Stack1-100.tif	2	83	2030.76			8	27
Stack1-100.tif	2	84	2053.03			9	27
Stack1-100.tif	2	85	2071.96			10	27
Stack1-100.tif	2	86	2077.03			11	27
Stack1-100.tif	2	87	2102.11			12	27
Stack1-100.tif	2	88	2124.65			13	27
Stack1-100.tif	2	89	2137.04			14	27
Stack1-100.tif	2	90	2158.56			15	27
Stack1-100.tif	2	91	2178.28			16	27
Stack1-100.tif	2	92	2186.07			17	27
Stack1-100.tif	2	93	2202.61			18	27
Stack1-100.tif	2	94	2206.17			19	27
Stack1-100.tif	2	95	2217.8			1	28
Stack1-100.tif	2	96	2231.95			2	28
Stack1-100.tif	2	97	2246.86			3	28
Stack1-100.tif	2	98	2278.59			4	28
Stack1-100.tif	2	99	2266.66			5	28
Stack1-100.tif	2	100	2284.37			6	28
Stack101-200.tif	2	101	2301.91			7	28
Stack101-200.tif	2	102	2312.78			8	28
Stack101-200.tif	2	103	2327.07			9	28
Stack101-200.tif	2	104	2325.89			10	28
Stack101-200.tif	2	105	2330.08			11	28
Stack101-200.tif	2	106	2352.93			12	28
Stack101-200.tif	2	107	2355.71			13	28
Stack101-200.tif	2	108	2377.32			14	28
Stack101-200.tif	2	109	2391.32			15	28
Stack101-200.tif	2	110	2385.56			16	28
Stack101-200.tif	2	111	2405.85			17	28
Stack101-200.tif	2	112	2426.11			18	28
Stack101-200.tif	2	113	2420.15			19	28
Stack101-200.tif	2	114	2430.09			1	29
Stack101-200.tif	2	115	2440.2			2	29
Stack101-200.tif	2	116	2439.47			3	29
Stack101-200.tif	2	117	2461.83			4	29
Stack101-200.tif	2	118	2453.28			5	29
Stack101-200.tif	2	119	2471.53			6	29
Stack101-200.tif	2	120	2480.23			7	29
Stack101-200.tif	2	121	2492.93			8	29
Stack101-200.tif	2	122	2494			9	29
Stack101-200.tif	2	123	2487.58			10	29
Stack101-200.tif	2	124	2497.53			11	29
Stack101-200.tif	2	125	2509.19			12	29
Stack101-200.tif	2	126	2507.64			13	29
Stack101-200.tif	2	127	2516.99			14	29
Stack101-200.tif	2	128	2519.91			15	29
Stack101-200.tif	2	129	2522.63			16	29
Stack101-200.tif	2	130	2524.84			17	29
Stack101-200.tif	2	131	2530.01			18	29
Stack101-200.tif	2	132	2546.59			19	29
Stack101-200.tif	2	133	2539.31			1	30
Stack101-200.tif	2	134	2546.08			2	30
Stack101-200.tif	2	135	2551.85			3	30
Stack101-200.tif	2	136	2556.91			4	30
Stack101-200.tif	2	137	2569.49			5	30
Stack101-200.tif	2	138	2572.79			6	30
Stack101-200.tif	2	139	2568.15			7	30
Stack101-200.tif	2	140	2563.43			8	30
Stack101-200.tif	2	141	2560.67			9	30
Stack101-200.tif	2	142	2578.19			10	30
Stack101-200.tif	2	143	2595.14			11	30
Stack101-200.tif	2	144	2577.04			12	30
Stack101-200.tif	2	145	2594.43			13	30
Stack101-200.tif	2	146	2587.93			14	30
Stack101-200.tif	2	147	2590			15	30
Stack101-200.tif	2	148	2595.2			16	30
Stack101-200.tif	2	149	2592.41			17	30
Stack101-200.tif	2	150	2608.82			18	30
Stack101-200.tif	2	151	2602.11			19	30
Stack101-200.tif	2	152	2609.39			1	31
Stack101-200.tif	2	153	2613.38			2	31
Stack101-200.tif	2	154	2611.98			3	31
Stack101-200.tif	2	155	2611.76			4	31
Stack101-200.tif	2	156	2612.29			5	31
Stack101-200.tif	2	157	2630.08			6	31
Stack101-200.tif	2	158	2625.41			7	31
Stack101-200.tif	2	159	2621.47			8	31
Stack101-200.tif	2	160	2636.25			9	31
Stack101-200.tif	2	161	2626.25			10	31
Stack101-200.tif	2	162	2624.36			11	31
Stack101-200.tif	2	163	2637.52			12	31
Stack101-200.tif	2	164	2614.34			13	31
Stack101-200.tif	2	165	2629.58			14	31
Stack101-200.tif	2	166	2643			15	31
Stack101-200.tif	2	167	2643.24			16	31
Stack101-200.tif	2	168	2654.38			17	31
Stack101-200.tif	2	169	2649.33			18	31
Stack101-200.tif	2	170	2655.12			19	31
Stack101-200.tif	2	171	2650.78			1	32
Stack101-200.tif	2	172	2652.57			2	32
Stack101-200.tif	2	173	2650.42			3	32
Stack101-200.tif	2	174	2654.81			4	32
Stack101-200.tif	2	175	2666.82			5	32
Stack101-200.tif	2	176	2673.86			6	32
Stack101-200.tif	2	177	2661.89			7	32
Stack101-200.tif	2	178	2666.68			8	32
Stack101-200.tif	2	179	2675.89			9	32
Stack101-200.tif	2	180	2669.65			10	32
Stack101-200.tif	2	181	2683.23			11	32
Stack101-200.tif	2	182	2666.21			12	32
Stack101-200.tif	2	183	2682.36			13	32
Stack101-200.tif	2	184	2680.53			14	32
Stack101-200.tif	2	185	2683.19			15	32
Stack101-200.tif	2	186	2676.51			16	32
Stack101-200.tif	2	187	2689.27			17	32
Stack101-200.tif	2	188	2680.77			18	32
Stack101-200.tif	2	189	2682.92			19	32
Stack101-200.tif	2	190	2696.44			1	33
Stack101-200.tif	2	191	2703.82			2	33
Stack101-200.tif	2	192	2690.51			3	33
Stack101-200.tif	2	193	2692.02			4	33
Stack101-200.tif	2	194	2692.56			5	33
Stack101-200.tif	2	195	2701.79			6	33
Stack101-200.tif	2	196	2686.67			7	33
Stack101-200.tif	2	197	2687.67			8	33
Stack101-200.tif	2	198	2708.43			9	33
Stack101-200.tif	2	199	2710.02			10	33
Stack101-200.tif	2	200	2709.69			11	33
Stack201-300.tif	2	201	2706.31			12	33
Stack201-300.tif	2	202	2705.87			13	33
Stack201-300.tif	2	203	2714.86			14	33
Stack201-300.tif	2	204	2700.96			15	33
Stack201-300.tif	2	205	2717.91			16	33
Stack201-300.tif	2	206	2711.23			17	33
Stack201-300.tif	2	207	2712.32			18	33
Stack201-300.tif	2	208	2718.43			19	33
Stack201-300.tif	2	209	2717.04			1	34
Stack201-300.tif	2	210	2716.82			2	34
Stack201-300.tif	2	211	2710.24			3	34
Stack201-300.tif	2	212	2726.58			4	34
Stack201-300.tif	2	213	2714.36			5	34
Stack201-300.tif	2	214	2708.64			6	34
Stack201-300.tif	2	215	2710.11			7	34
Stack201-300.tif	2	216	2732.29			8	34
Stack201-300.tif	2	217	2710.98			9	34
Stack201-300.tif	2	218	2719.23			10	34
Stack201-300.tif	2	219	2725.67			11	34
Stack201-300.tif	2	220	2718.97			12	34
Stack201-300.tif	2	221	2727.74			13	34
Stack201-300.tif	2	222	2732.1			14	34
Stack201-300.tif	2	223	2727.08			15	34
Stack201-300.tif	2	224	2723.01			16	34
Stack201-300.tif	2	225	2717.49			17	34
Stack201-300.tif	2	226	2735.35			18	34
Stack201-300.tif	2	227	2717.35			19	34
Stack201-300.tif	2	228	2725.03			1	35
Stack201-300.tif	2	229	2718.76			2	35
Stack201-300.tif	2	230	2720.53			3	35
Stack201-300.tif	2	231	2726.95			4	35
Stack201-300.tif	2	232	2716.6			5	35
Stack201-300.tif	2	233	2710.81			6	35
Stack201-300.tif	2	234	2733.26			7	35
Stack201-300.tif	2	235	2725.68			8	35
Stack201-300.tif	2	236	2724.63			9	35
Stack201-300.tif	2	237	2718.26			10	35
Stack201-300.tif	2	238	2725.47			11	35
Stack201-300.tif	2	239	2713.72			12	35
Stack201-300.tif	2	240	2726.53			13	35
Stack201-300.tif	2	241	2711.61			14	35
Stack201-300.tif	2	242	2723.1			15	35
Stack201-300.tif	2	243	2720.08			16	35
Stack201-300.tif	2	244	2720.67			17	35
Stack201-300.tif	2	245	2724.94			18	35
Stack201-300.tif	2	246	2717.07			19	35
Stack201-300.tif	2	247	2719.32			1	36
Stack201-300.tif	2	248	2738.82			2	36
Stack201-300.tif	2	249	2716.02			3	36
Stack201-300.tif	2	250	2715.94			4	36
Stack201-300.tif	2	251	2724.29			5	36
Stack201-300.tif	2	252	2718.58			6	36
Stack201-300.tif	2	253	2710.91			7	36
Stack201-300.tif	2	254	2705.87			8	36
Stack201-300.tif	2	255	2718.73			9	36
Stack201-300.tif	2	256	2727.73			10	36
Stack201-300.tif	2	257	2724.34			11	36
Stack201-300.tif	2	258	2711.2			12	36
Stack201-300.tif	2	259	2714.08			13	36
Stack201-300.tif	2	260	2717.98			14	36
Stack201-300.tif	2	261	2724.79			15	36
Stack201-300.tif	2	262	2717.62			16	36
Stack201-300.tif	2	263	2712.26			17	36
Stack201-300.tif	2	264	2707.26			18	36
Stack201-300.tif	2	265	2711.63			19	36
Stack201-300.tif	2	266	2712.63			1	37
Stack201-300.tif	2	267	2719.28			2	37
Stack201-300.tif	2	268	2707.73			3	37
Stack201-300.tif	2	269	2706.97			4	37
Stack201-300.tif	2	270	2707.36			5	37
Stack201-300.tif	2	271	2712.1			6	37
Stack201-300.tif	2	272	2713.04			7	37
Stack201-300.tif	2	273	2703.09			8	37
Stack201-300.tif	2	274	2715.54			9	37
Stack201-300.tif	2	275	2709.59			10	37
Stack201-300.tif	2	276	2711.47			11	37
Stack201-300.tif	2	277	2709.07			12	37
Stack201-300.tif	2	278	2702.42			13	37
Stack201-300.tif	2	279	2705.53			14	37
Stack201-300.tif	2	280	2706.15			15	37
Stack201-300.tif	2	281	2690.54			16	37
Stack201-300.tif	2	282	2700.21			17	37
Stack201-300.tif	2	283	2716.29			18	37
Stack201-300.tif	2	284	2699.77			19	37
Stack201-300.tif	2	285	2700.25			1	38
Stack201-300.tif	2	286	2709.28			2	38
Stack201-300.tif	2	287	2693.98			3	38
Stack201-300.tif	2	288	2690.39			4	38
Stack201-300.tif	2	289	2686.93			5	38
Stack201-300.tif	2	290	2707.62			6	38
Stack201-300.tif	2	291	2696.98			7	38
Stack201-300.tif	2	292	2696.76			8	38
Stack201-300.tif	2	293	2701.19			9	38
Stack201-300.tif	2	294	2705.25			10	38
Stack201-300.tif	2	295	2686.83			11	38
Stack201-300.tif	2	296	2699.57			12	38
Stack201-300.tif	2	297	2690.33			13	38
Stack201-300.tif	2	298	2685.58			14	38
Stack201-300.tif	2	299	2695.01			15	38
Stack201-300.tif	2	300	2685.7			16	38
Stack301-419.tif	2	301	2688.39			17	38
Stack301-419.tif	2	302	2691.78			18	38
Stack301-419.tif	2	303	2695.06			19	38
Stack301-419.tif	2	304	2687.09			1	39
Stack301-419.tif	2	305	2695.93			2	39
Stack301-419.tif	2	306	2692.71			3	39
Stack301-419.tif	2	307	2685.85			4	39
Stack301-419.tif	2	308	2677.43			5	39
Stack301-419.tif	2	309	2683.67			6	39
Stack301-419.tif	2	310	2688.64			7	39
Stack301-419.tif	2	311	2679.24			8	39
Stack301-419.tif	2	312	2690.76			9	39
Stack301-419.tif	2	313	2675.13			10	39
Stack301-419.tif	2	314	2679.21			11	39
Stack301-419.tif	2	315	2695.69			12	39
Stack301-419.tif	2	316	2685.5			13	39
Stack301-419.tif	2	317	2672.6			14	39
Stack301-419.tif	2	318	2671.14			15	39
Stack301-419.tif	2	319	2673.57			16	39
Stack301-419.tif	2	320	2677.24			17	39
Stack301-419.tif	2	321	2678.91			18	39
Stack301-419.tif	2	322	2669.94			19	39
Stack301-419.tif	2	323	2678.27			1	40
Stack301-419.tif	2	324	2682.76			2	40
Stack301-419.tif	2	325	2677.95			3	40
Stack301-419.tif	2	326	2672.65			4	40
Stack301-419.tif	2	327	2668.97			5	40
Stack301-419.tif	2	328	2670.12			6	40
Stack301-419.tif	2	329	2669.36			7	40
Stack301-419.tif	2	330	2671.46			8	40
Stack301-419.tif	2	331	2666.31			9	40
Stack301-419.tif	2	332	2665.63			10	40
Stack301-419.tif	2	333	2670.41			11	40
Stack301-419.tif	2	334	2666.82			12	40
Stack301-419.tif	2	335	2665.01			13	40
Stack301-419.tif	2	336	2662.76			14	40
Stack301-419.tif	2	337	2669.43			15	40
Stack301-419.tif	2	338	2679.25			16	40
Stack301-419.tif	2	339	2665.6			17	40
Stack301-419.tif	2	340	2655.8			18	40
Stack301-419.tif	2	341	2655.08			19	40
Stack301-419.tif	2	342	2663.79			1	41
Stack301-419.tif	2	343	2659.16			2	41
Stack301-419.tif	2	344	2653.25			3	41
Stack301-419.tif	2	345	2664.05			4	41
Stack301-419.tif	2	346	2658.19			5	41
Stack301-419.tif	2	347	2660.5			6	41
Stack301-419.tif	2	348	2661.06			7	41
Stack301-419.tif	2	349	2662.49			8	41
Stack301-419.tif	2	350	2646.19			9	41
Stack301-419.tif	2	351	2660.02			10	41
Stack301-419.tif	2	352	2655.08			11	41
Stack301-419.tif	2	353	2656.1			12	41
Stack301-419.tif	2	354	2649.29			13	41
Stack301-419.tif	2	355	2645.56			14	41
Stack301-419.tif	2	356	2649.1			15	41
Stack301-419.tif	2	357	2654.72			16	41
Stack301-419.tif	2	358	2645.92			17	41
Stack301-419.tif	2	359	2660.9			18	41
Stack301-419.tif	2	360	2662.21			19	41
Stack301-419.tif	2	361	2647.37			1	42
Stack301-419.tif	2	362	2645.73			2	42
Stack301-419.tif	2	363	2644.76			3	42
Stack301-419.tif	2	364	2658.51			4	42
Stack301-419.tif	2	365	2656.05			5	42
Stack301-419.tif	2	366	2653.52			6	42
Stack301-419.tif	2	367	2652.89			7	42
Stack301-419.tif	2	368	2646.32			8	42
Stack301-419.tif	2	369	2647.99			9	42
Stack301-419.tif	2	370	2650.61			10	42
Stack301-419.tif	2	371	2648.49			11	42
Stack301-419.tif	2	372	2647.84			12	42
Stack301-419.tif	2	373	2638.54			13	42
Stack301-419.tif	2	374	2645.14			14	42
Stack301-419.tif	2	375	2639.89			15	42
Stack301-419.tif	2	376	2638.29			16	42
Stack301-419.tif	2	377	2632.98			17	42
Stack301-419.tif	2	378	2642.83			18	42
Stack301-419.tif	2	379	2630.2			19	42
Stack301-419.tif	2	380	2645.73			1	43
Stack301-419.tif	2	381	2643.45			2	43
Stack301-419.tif	2	382	2650.68			3	43
Stack301-419.tif	2	383	2629.73			4	43
Stack301-419.tif	2	384	2640.41			5	43
Stack301-419.tif	2	385	2641.69			6	43
Stack301-419.tif	2	386	2631.86			7	43
Stack301-419.tif	2	387	2638.27			8	43
Stack301-419.tif	2	388	2636.07			9	43
Stack301-419.tif	2	389	2645.8			10	43
Stack301-419.tif	2	390	2634.76			11	43
Stack301-419.tif	2	391	2649.74			12	43
Stack301-419.tif	2	392	2627.78			13	43
Stack301-419.tif	2	393	2628.12			14	43
Stack301-419.tif	2	394	2634.01			15	43
Stack301-419.tif	2	395	2622.56			16	43
Stack301-419.tif	2	396	2634.07			17	43
Stack301-419.tif	2	397	2630.95			18	43
Stack301-419.tif	2	398	2626.48			19	43
Stack301-419.tif	2	399	2631.4			1	44
Stack301-419.tif	2	400	2638.09			2	44
Stack301-419.tif	2	401	2633.42			3	44
Stack301-419.tif	2	402	2631.82			4	44
Stack301-419.tif	2	403	2629.15			5	44
Stack301-419.tif	2	404	2624.96			6	44
Stack301-419.tif	2	405	2630.17			7	44
Stack301-419.tif	2	406	2621.48			8	44
Stack301-419.tif	2	407	2623.78			9	44
Stack301-419.tif	2	408	2612.24			10	44
Stack301-419.tif	2	409	2632.55			11	44
Stack301-419.tif	2	410	2617.14			12	44
Stack301-419.tif	2	411	2620.18			13	44
Stack301-419.tif	2	412	2630.44			14	44
Stack301-419.tif	2	413	2618.38			15	44
Stack301-419.tif	2	414	2628.24			16	44
Stack301-419.tif	2	415	2613.19			17	44
Stack301-419.tif	2	416	2623.09			18	44
Stack301-419.tif	2	417	2626.71			19	44
Stack301-419.tif	2	418	2623.69			1	45
Stack301-419.tif	2	419	2624.65			2	45
Stack1-100.tif	3	1	2579.9			3	45
Stack1-100.tif	3	2	2579.6			4	45
Stack1-100.tif	3	3	2565.83			5	45
Stack1-100.tif	3	4	2581.41			6	45
Stack1-100.tif	3	5	2584.18			7	45
Stack1-100.tif	3	6	2576.98			8	45
Stack1-100.tif	3	7	2578.08			9	45
Stack1-100.tif	3	8	2579.31			10	45
Stack1-100.tif	3	9	2585.7			11	45
Stack1-100.tif	3	10	2595.74			12	45
Stack1-100.tif	3	11	2587.76			13	45
Stack1-100.tif	3	12	2601.36			14	45
Stack1-100.tif	3	13	2590.75			15	45
Stack1-100.tif	3	14	2590.42			16	45
Stack1-100.tif	3	15	2602.78			17	45
Stack1-100.tif	3	16	2592.84			18	45
Stack1-100.tif	3	17	2600.96			19	45
Stack1-100.tif	3	18	2616.13			1	46
Stack1-100.tif	3	19	2594.92			2	46
Stack1-100.tif	3	20	2610.74			3	46
Stack1-100.tif	3	21	2607.18			4	46
Stack1-100.tif	3	22	2615.17			5	46
Stack1-100.tif	3	23	2614.38			6	46
Stack1-100.tif	3	24	1539.95			7	46
Stack1-100.tif	3	25	2641.74			8	46
Stack1-100.tif	3	26	1409.95			9	46
Stack1-100.tif	3	27	-87.9986			10	46
Stack1-100.tif	3	28	249.127			11	46
Stack1-100.tif	3	29	2682.15			12	46
Stack1-100.tif	3	30	2659.4			13	46
Stack1-100.tif	3	31	2648.1			14	46
Stack1-100.tif	3	32	2626.1			15	46
Stack1-100.tif	3	33	2647.44			16	46
Stack1-100.tif	3	34	2650.16			17	46
Stack1-100.tif	3	35	2637.96			18	46
Stack1-100.tif	3	36	2608.64			19	46
Stack1-100.tif	3	37	382.901			1	47
Stack1-100.tif	3	38	2610.27			2	47
Stack1-100.tif	3	39	2666.33			3	47
Stack1-100.tif	3	40	2676.37			4	47
Stack1-100.tif	3	41	2670.81			5	47
Stack1-100.tif	3	42	2660.35			6	47
Stack1-100.tif	3	43	2662.89			7	47
Stack1-100.tif	3	44	2666.54			8	47
Stack1-100.tif	3	45	2666.32			9	47
Stack1-100.tif	3	46	2667.25			10	47
Stack1-100.tif	3	47	2668.83			11	47
Stack1-100.tif	3	48	2662.7			12	47
Stack1-100.tif	3	49	2668.2			13	47
Stack1-100.tif	3	50	2656.21			14	47
Stack1-100.tif	3	51	2666.22			15	47
Stack1-100.tif	3	52	2666.58			16	47
Stack1-100.tif	3	53	2666.02			17	47
Stack1-100.tif	3	54	1793.1			18	47
Stack1-100.tif	3	55	209.837			19	47
Stack1-100.tif	3	56	2552.74			1	48
Stack1-100.tif	3	57	2641.65			2	48
Stack1-100.tif	3	58	2630.11			3	48
Stack1-100.tif	3	59	3944.97			4	48
Stack1-100.tif	3	60	2651.58			5	48
Stack1-100.tif	3	61	2639.65			6	48
Stack1-100.tif	3	62	2652.96			7	48
Stack1-100.tif	3	63	2657.65			8	48
Stack1-100.tif	3	64	2662.25			9	48
Stack1-100.tif	3	65	2655.24			10	48
Stack1-100.tif	3	66	2649.27			11	48
Stack1-100.tif	3	67	2655.97			12	48
Stack1-100.tif	3	68	2636.4			13	48
Stack1-100.tif	3	69	2649.45			14	48
Stack1-100.tif	3	70	2650.92			15	48
Stack1-100.tif	3	71	2650.1			16	48
Stack1-100.tif	3	72	2654.01			17	48
Stack1-100.tif	3	73	2665.87			18	48
Stack1-100.tif	3	74	2662.1			19	48
Stack1-100.tif	3	75	2672.84			1	49
Stack1-100.tif	3	76	2672.39			2	49
Stack1-100.tif	3	77	2669.55			3	49
Stack1-100.tif	3	78	2718.5			4	49
Stack1-100.tif	3	79	2717.71			5	49
Stack1-100.tif	3	80	2734.18			6	49
Stack1-100.tif	3	81	2748.4			7	49
Stack1-100.tif	3	82	2763.95			8	49
Stack1-100.tif	3	83	2771.36			9	49
Stack1-100.tif	3	84	2786.58			10	49
Stack1-100.tif	3	85	2801.39			11	49
Stack1-100.tif	3	86	2824.89			12	49
Stack1-100.tif	3	87	2827.14			13	49
Stack1-100.tif	3	88	2849.99			14	49
Stack1-100.tif	3	89	2870.6			15	49
Stack1-100.tif	3	90	2895.62			16	49
Stack1-100.tif	3	91	2922.44			17	49
Stack1-100.tif	3	92	2935.63			18	49
Stack1-100.tif	3	93	2945.7			19	49
Stack1-100.tif	3	94	2966.53			1	50
Stack1-100.tif	3	95	2982.57			2	50
Stack1-100.tif	3	96	3004.06			3	50
Stack1-100.tif	3	97	3021.51			4	50
Stack1-100.tif	3	98	3058.24			5	50
Stack1-100.tif	3	99	3057.03			6	50
Stack1-100.tif	3	100	3077.33			7	50
Stack101-200.tif	3	101	3079.45			8	50
Stack101-200.tif	3	102	3100.03			9	50
Stack101-200.tif	3	103	3112.81			10	50
Stack101-200.tif	3	104	3134.63			11	50
Stack101-200.tif	3	105	3143.05			12	50
Stack101-200.tif	3	106	3163.43			13	50
Stack101-200.tif	3	107	3159.52			14	50
Stack101-200.tif	3	108	3184.25			15	50
Stack101-200.tif	3	109	3180.58			16	50
Stack101-200.tif	3	110	3138.94			17	50
Stack101-200.tif	3	111	3236.98			18	50
Stack101-200.tif	3	112	3241.37			19	50
Stack101-200.tif	3	113	3266.18			1	51
Stack101-200.tif	3	114	3279.17			2	51
Stack101-200.tif	3	115	3296.4			3	51
Stack101-200.tif	3	116	3281.41			4	51
Stack101-200.tif	3	117	3301.43			5	51
Stack101-200.tif	3	118	3307.31			6	51
Stack101-200.tif	3	119	3333.52			7	51
Stack101-200.tif	3	120	3335.51			8	51
Stack101-200.tif	3	121	3353.34			9	51
Stack101-200.tif	3	122	3356.78			10	51
Stack101-200.tif	3	123	3362.36			11	51
Stack101-200.tif	3	124	3366.83			12	51
Stack101-200.tif	3	125	3378.33			13	51
Stack101-200.tif	3	126	3380.59			14	51
Stack101-200.tif	3	127	3400.6			15	51
Stack101-200.tif	3	128	3383.02			16	51
Stack101-200.tif	3	129	3401.04			17	51
Stack101-200.tif	3	130	3404.61			18	51
Stack101-200.tif	3	131	3421.03			19	51
Stack101-200.tif	3	132	3429.27			1	52
Stack101-200.tif	3	133	3430.69			2	52
Stack101-200.tif	3	134	3437.79			3	52
Stack101-200.tif	3	135	3450.59			4	52
Stack101-200.tif	3	136	3454.07			5	52
Stack101-200.tif	3	137	3451.81			6	52
Stack101-200.tif	3	138	3449.92			7	52
Stack101-200.tif	3	139	3462.07			8	52
Stack101-200.tif	3	140	3462.75			9	52
Stack101-200.tif	3	141	3481.5			10	52
Stack101-200.tif	3	142	3478.08			11	52
Stack101-200.tif	3	143	3482.14			12	52
Stack101-200.tif	3	144	3482.36			13	52
Stack101-200.tif	3	145	3492.74			14	52
Stack101-200.tif	3	146	3483.89			15	52
Stack101-200.tif	3	147	3502.74			16	52
Stack101-200.tif	3	148	3506.45			17	52
Stack101-200.tif	3	149	3506.26			18	52
Stack101-200.tif	3	150	3509.38			19	52
Stack101-200.tif	3	151	3516.41			1	53
Stack101-200.tif	3	152	3525.11			2	53
Stack101-200.tif	3	153	3522.37			3	53
Stack101-200.tif	3	154	3535.84			4	53
Stack101-200.tif	3	155	3524.24			5	53
Stack101-200.tif	3	156	3545.01			6	53
Stack101-200.tif	3	157	3543.56			7	53
Stack101-200.tif	3	158	3548.96			8	53
Stack101-200.tif	3	159	3543.07			9	53
Stack101-200.tif	3	160	3559			10	53
Stack101-200.tif	3	161	3561.07			11	53
Stack101-200.tif	3	162	3547.81			12	53
Stack101-200.tif	3	163	3557.24			13	53
Stack101-200.tif	3	164	3578.11			14	53
Stack101-200.tif	3	165	3587.55			15	53
Stack101-200.tif	3	166	3577.03			16	53
Stack101-200.tif	3	167	3593.52			17	53
Stack101-200.tif	3	168	3596.18			18	53
Stack101-200.tif	3	169	3590.39			19	53
Stack101-200.tif	3	170	3597.04			1	54
Stack101-200.tif	3	171	3596.66			2	54
Stack101-200.tif	3	172	3598.99			3	54
Stack101-200.tif	3	173	3608.94			4	54
Stack101-200.tif	3	174	3609.13			5	54
Stack101-200.tif	3	175	3615.49			6	54
Stack101-200.tif	3	176	3628.46			7	54
Stack101-200.tif	3	177	3618.59			8	54
Stack101-200.tif	3	178	3631.98			9	54
Stack101-200.tif	3	179	3636.03			10	54
Stack101-200.tif	3	180	3639.3			11	54
Stack101-200.tif	3	181	3631.46			12	54
Stack101-200.tif	3	182	3648.08			13	54
Stack101-200.tif	3	183	3645.74			14	54
Stack101-200.tif	3	184	3664.01			15	54
Stack101-200.tif	3	185	3656.88			16	54
Stack101-200.tif	3	186	3659.93			17	54
Stack101-200.tif	3	187	3670.61			18	54
Stack101-200.tif	3	188	3679.82			19	54
Stack101-200.tif	3	189	3684.49			1	55
Stack101-200.tif	3	190	3684.72			2	55
Stack101-200.tif	3	191	3680.27			3	55
Stack101-200.tif	3	192	3678.72			4	55
Stack101-200.tif	3	193	3685.46			5	55
Stack101-200.tif	3	194	3699.34			6	55
Stack101-200.tif	3	195	3693.08			7	55
Stack101-200.tif	3	196	3703.17			8	55
Stack101-200.tif	3	197	3699.19			9	55
Stack101-200.tif	3	198	3706.74			10	55
Stack101-200.tif	3	199	3699.95			11	55
Stack101-200.tif	3	200	3714.59			12	55
Stack201-300.tif	3	201	3720.89			13	55
Stack201-300.tif	3	202	3719.39			14	55
Stack201-300.tif	3	203	3720.38			15	55
Stack201-300.tif	3	204	3720.24			16	55
Stack201-300.tif	3	205	3737.4			17	55
Stack201-300.tif	3	206	3728.89			18	55
Stack201-300.tif	3	207	3735.31			19	55
Stack201-300.tif	3	208	3737.43			1	56
Stack201-300.tif	3	209	3733.94			2	56
Stack201-300.tif	3	210	3744.9			3	56
Stack201-300.tif	3	211	3747.68			4	56
Stack201-300.tif	3	212	3738.93			5	56
Stack201-300.tif	3	213	3743.11			6	56
Stack201-300.tif	3	214	3751.57			7	56
Stack201-300.tif	3	215	3751.91			8	56
Stack201-300.tif	3	216	3761.18			9	56
Stack201-300.tif	3	217	3754.02			10	56
Stack201-300.tif	3	218	3759.15			11	56
Stack201-300.tif	3	219	3766.6			12	56
Stack201-300.tif	3	220	3773.98			13	56
Stack201-300.tif	3	221	3769.82			14	56
Stack201-300.tif	3	222	3774.93			15	56
Stack201-300.tif	3	223	3761.77			16	56
Stack201-300.tif	3	224	3768.89			17	56
Stack201-300.tif	3	225	3777.12			18	56
Stack201-300.tif	3	226	3778.43			19	56
Stack201-300.tif	3	227	3768.89			1	57
Stack201-300.tif	3	228	3776.51			2	57
Stack201-300.tif	3	229	3786.01			3	57
Stack201-300.tif	3	230	3780.87			4	57
Stack201-300.tif	3	231	3784.66			5	57
Stack201-300.tif	3	232	3785.7			6	57
Stack201-300.tif	3	233	3775.44			7	57
Stack201-300.tif	3	234	3790.81			8	57
Stack201-300.tif	3	235	3797.17			9	57
Stack201-300.tif	3	236	3797.49			10	57
Stack201-300.tif	3	237	3796.87			11	57
Stack201-300.tif	3	238	3787.61			12	57
Stack201-300.tif	3	239	3797.29			13	57
Stack201-300.tif	3	240	3800.92			14	57
Stack201-300.tif	3	241	3795.98			15	57
Stack201-300.tif	3	242	3795.04			16	57
Stack201-300.tif	3	243	3792.37			17	57
Stack201-300.tif	3	244	3802.07			18	57
Stack201-300.tif	3	245	3806.91			19	57
Stack201-300.tif	3	246	3814.48			1	58
Stack201-300.tif	3	247	3806.27			2	58
Stack201-300.tif	3	248	3803.89			3	58
Stack201-300.tif	3	249	3817.74			4	58
Stack201-300.tif	3	250	3810.6			5	58
Stack201-300.tif	3	251	3805.13			6	58
Stack201-300.tif	3	252	3806.96			7	58
Stack201-300.tif	3	253	3810.12			8	58
Stack201-300.tif	3	254	3816.11			9	58
Stack201-300.tif	3	255	3806.32			10	58
Stack201-300.tif	3	256	3820.03			11	58
Stack201-300.tif	3	257	3813.71			12	58
Stack201-300.tif	3	258	3814.49			13	58
Stack201-300.tif	3	259	3816.81			14	58
Stack201-300.tif	3	260	3810.81			15	58
Stack201-300.tif	3	261	3816.39			16	58
Stack201-300.tif	3	262	3811.08			17	58
Stack201-300.tif	3	263	3813.8			18	58
Stack201-300.tif	3	264	3816.97			19	58
Stack201-300.tif	3	265	3822.99			1	59
Stack201-300.tif	3	266	3816.54			2	59
Stack201-300.tif	3	267	3827.83			3	59
Stack201-300.tif	3	268	3820.21			4	59
Stack201-300.tif	3	269	3821.02			5	59
Stack201-300.tif	3	270	3820.16			6	59
Stack201-300.tif	3	271	3817.49			7	59
Stack201-300.tif	3	272	3816.43			8	59
Stack201-300.tif	3	273	3808.54			9	59
Stack201-300.tif	3	274	3817.86			10	59
Stack201-300.tif	3	275	3817.95			11	59
Stack201-300.tif	3	276	3817.49			12	59
Stack201-300.tif	3	277	3831.01			13	59
Stack201-300.tif	3	278	3820.53			14	59
Stack201-300.tif	3	279	3826.87			15	59
Stack201-300.tif	3	280	3826.58			16	59
Stack201-300.tif	3	281	3826.62			17	59
Stack201-300.tif	3	282	3823.32			18	59
Stack201-300.tif	3	283	3818.33			19	59
Stack201-300.tif	3	284	3811.4			1	60
Stack201-300.tif	3	285	3810.54			2	60
Stack201-300.tif	3	286	3821.26			3	60
Stack201-300.tif	3	287	3832.13			4	60
Stack201-300.tif	3	288	3830.88			5	60
Stack201-300.tif	3	289	3817.31			6	60
Stack201-300.tif	3	290	3813.84			7	60
Stack201-300.tif	3	291	3821.8			8	60
Stack201-300.tif	3	292	3815.71			9	60
Stack201-300.tif	3	293	3816.12			10	60
Stack201-300.tif	3	294	3815.56			11	60
Stack201-300.tif	3	295	3823.6			12	60
Stack201-300.tif	3	296	3813.61			13	60
Stack201-300.tif	3	297	3804.24			14	60
Stack201-300.tif	3	298	3818.31			15	60
Stack201-300.tif	3	299	3815.07			16	60
Stack201-300.tif	3	300	3801.68			17	60
Stack301-419.tif	3	301	3821.08			18	60
Stack301-419.tif	3	302	3819.73			19	60
Stack301-419.tif	3	303	3814.77			1	61
Stack301-419.tif	3	304	3825.46			2	61
Stack301-419.tif	3	305	3819.11			3	61
Stack301-419.tif	3	306	3814.51			4	61
Stack301-419.tif	3	307	3827.36			5	61
Stack301-419.tif	3	308	3819.61			6	61
Stack301-419.tif	3	309	3815.75			7	61
Stack301-419.tif	3	310	3818.77			8	61
Stack301-419.tif	3	311	3829.57			9	61
Stack301-419.tif	3	312	3823.07			10	61
Stack301-419.tif	3	313	3812.04			11	61
Stack301-419.tif	3	314	3809.55			12	61
Stack301-419.tif	3	315	3806.06			13	61
Stack301-419.tif	3	316	3813.14			14	61
Stack301-419.tif	3	317	3802.98			15	61
Stack301-419.tif	3	318	3813.36			16	61
Stack301-419.tif	3	319	3805.66			17	61
Stack301-419.tif	3	320	3821.21			18	61
Stack301-419.tif	3	321	3816.3			19	61
Stack301-419.tif	3	322	3814.35			1	62
Stack301-419.tif	3	323	3814.28			2	62
Stack301-419.tif	3	324	3806.61			3	62
Stack301-419.tif	3	325	3807.06			4	62
Stack301-419.tif	3	326	3812.38			5	62
Stack301-419.tif	3	327	3808.52			6	62
Stack301-419.tif	3	328	3805.21			7	62
Stack301-419.tif	3	329	3811.79			8	62
Stack301-419.tif	3	330	3790.94			9	62
Stack301-419.tif	3	331	3810.63			10	62
Stack301-419.tif	3	332	3807.52			11	62
Stack301-419.tif	3	333	3809.36			12	62
Stack301-419.tif	3	334	3794.44			13	62
Stack301-419.tif	3	335	3805.99			14	62
Stack301-419.tif	3	336	3810.74			15	62
Stack301-419.tif	3	337	3802.95			16	62
Stack301-419.tif	3	338	3796.27			17	62
Stack301-419.tif	3	339	3811.59			18	62
Stack301-419.tif	3	340	3803.65			19	62
Stack301-419.tif	3	341	3805.69			1	63
Stack301-419.tif	3	342	3809.05			2	63
Stack301-419.tif	3	343	3798.06			3	63
Stack301-419.tif	3	344	3790.46			4	63
Stack301-419.tif	3	345	3799.69			5	63
Stack301-419.tif	3	346	3798.22			6	63
Stack301-419.tif	3	347	3791.82			7	63
Stack301-419.tif	3	348	3805.06			8	63
Stack301-419.tif	3	349	3796.94			9	63
Stack301-419.tif	3	350	3796.86			10	63
Stack301-419.tif	3	351	3803.44			11	63
Stack301-419.tif	3	352	3783.58			12	63
Stack301-419.tif	3	353	3796.31			13	63
Stack301-419.tif	3	354	3799.63			14	63
Stack301-419.tif	3	355	3788.12			15	63
Stack301-419.tif	3	356	3789.44			16	63
Stack301-419.tif	3	357	3783.89			17	63
Stack301-419.tif	3	358	3793.18			18	63
Stack301-419.tif	3	359	3789.47			19	63
Stack301-419.tif	3	360	3779.11			1	64
Stack301-419.tif	3	361	3782.68			2	64
Stack301-419.tif	3	362	3791.07			3	64
Stack301-419.tif	3	363	3778.85			4	64
Stack301-419.tif	3	364	3772.57			5	64
Stack301-419.tif	3	365	3773.97			6	64
Stack301-419.tif	3	366	3787.06			7	64
Stack301-419.tif	3	367	3783.71			8	64
Stack301-419.tif	3	368	3785.68			9	64
Stack301-419.tif	3	369	3774.57			10	64
Stack301-419.tif	3	370	3790.69			11	64
Stack301-419.tif	3	371	3781.47			12	64
Stack301-419.tif	3	372	3784.47			13	64
Stack301-419.tif	3	373	3789.01			14	64
Stack301-419.tif	3	374	3770.47			15	64
Stack301-419.tif	3	375	3766.1			16	64
Stack301-419.tif	3	376	3760.5			17	64
Stack301-419.tif	3	377	3753.36			18	64
Stack301-419.tif	3	378	3772.61			19	64
Stack301-419.tif	3	379	3770.54			1	65
Stack301-419.tif	3	380	3762.38			2	65
Stack301-419.tif	3	381	3779.5			3	65
Stack301-419.tif	3	382	3763.69			4	65
Stack301-419.tif	3	383	3776.29			5	65
Stack301-419.tif	3	384	3774.35			6	65
Stack301-419.tif	3	385	3777.96			7	65
Stack301-419.tif	3	386	3776.7			8	65
Stack301-419.tif	3	387	3766.39			9	65
Stack301-419.tif	3	388	3765.73			10	65
Stack301-419.tif	3	389	3774.52			11	65
Stack301-419.tif	3	390	3769.01			12	65
Stack301-419.tif	3	391	3762.41			13	65
Stack301-419.tif	3	392	3761.07			14	65
Stack301-419.tif	3	393	3767.51			15	65
Stack301-419.tif	3	394	3764.02			16	65
Stack301-419.tif	3	395	3758.96			17	65
Stack301-419.tif	3	396	3773.29			18	65
Stack301-419.tif	3	397	3768.06			19	65
Stack301-419.tif	3	398	3768.4			1	66
Stack301-419.tif	3	399	3762.44			2	66
Stack301-419.tif	3	400	3762.13			3	66
Stack301-419.tif	3	401	3753.91			4	66
Stack301-419.tif	3	402	3771.54			5	66
Stack301-419.tif	3	403	3756.22			6	66
Stack301-419.tif	3	404	3756.49			7	66
Stack301-419.tif	3	405	3755.5			8	66
Stack301-419.tif	3	406	3750.7			9	66
Stack301-419.tif	3	407	3756.96			10	66
Stack301-419.tif	3	408	3748.78			11	66
Stack301-419.tif	3	409	3746.22			12	66
Stack301-419.tif	3	410	3752.53			13	66
Stack301-419.tif	3	411	3745.69			14	66
Stack301-419.tif	3	412	3748.34			15	66
Stack301-419.tif	3	413	3751.34			16	66
Stack301-419.tif	3	414	3748.95			17	66
Stack301-419.tif	3	415	3752.69			18	66
Stack301-419.tif	3	416	3745.28			19	66
Stack301-419.tif	3	417	3736.82			1	67
Stack301-419.tif	3	418	3747.08			2	67
Stack301-419.tif	3	419	3744.13			3	67
Stack1-100.tif	4	1	2348.6			4	67
Stack1-100.tif	4	2	2345.52			5	67
Stack1-100.tif	4	3	2351.06			6	67
Stack1-100.tif	4	4	2354.3			7	67
Stack1-100.tif	4	5	2356.17			8	67
Stack1-100.tif	4	6	2354.39			9	67
Stack1-100.tif	4	7	2347.22			10	67
Stack1-100.tif	4	8	2357.19			11	67
Stack1-100.tif	4	9	2361.6			12	67
Stack1-100.tif	4	10	2367.04			13	67
Stack1-100.tif	4	11	2375.41			14	67
Stack1-100.tif	4	12	2353.49			15	67
Stack1-100.tif	4	13	2367.21			16	67
Stack1-100.tif	4	14	2363.71			17	67
Stack1-100.tif	4	15	2353.02			18	67
Stack1-100.tif	4	16	2357.05			19	67
Stack1-100.tif	4	17	2385.45			1	68
Stack1-100.tif	4	18	2384.25			2	68
Stack1-100.tif	4	19	2363.59			3	68
Stack1-100.tif	4	20	2380.57			4	68
Stack1-100.tif	4	21	2377.35			5	68
Stack1-100.tif	4	22	2374.06			6	68
Stack1-100.tif	4	23	2385.27			7	68
Stack1-100.tif	4	24	1624.36			8	68
Stack1-100.tif	4	25	2398.72			9	68
Stack1-100.tif	4	26	1537.62			10	68
Stack1-100.tif	4	27	-97.1205			11	68
Stack1-100.tif	4	28	365.373			12	68
Stack1-100.tif	4	29	2445.76			13	68
Stack1-100.tif	4	30	2422.25			14	68
Stack1-100.tif	4	31	2427.06			15	68
Stack1-100.tif	4	32	2408.38			16	68
Stack1-100.tif	4	33	2433.06			17	68
Stack1-100.tif	4	34	2418.48			18	68
Stack1-100.tif	4	35	2424.78			19	68
Stack1-100.tif	4	36	2419.6			1	69
Stack1-100.tif	4	37	451.017			2	69
Stack1-100.tif	4	38	2375.62			3	69
Stack1-100.tif	4	39	2423.15			4	69
Stack1-100.tif	4	40	2422.44			5	69
Stack1-100.tif	4	41	2431.97			6	69
Stack1-100.tif	4	42	2419.22			7	69
Stack1-100.tif	4	43	2424.28			8	69
Stack1-100.tif	4	44	2429.39			9	69
Stack1-100.tif	4	45	2412.1			10	69
Stack1-100.tif	4	46	2425.86			11	69
Stack1-100.tif	4	47	2407.99			12	69
Stack1-100.tif	4	48	2423.22			13	69
Stack1-100.tif	4	49	2424.99			14	69
Stack1-100.tif	4	50	2423.4			15	69
Stack1-100.tif	4	51	2435			16	69
Stack1-100.tif	4	52	2433.95			17	69
Stack1-100.tif	4	53	2429.88			18	69
Stack1-100.tif	4	54	1817.79			19	69
Stack1-100.tif	4	55	269.694			1	70
Stack1-100.tif	4	56	2334.63			2	70
Stack1-100.tif	4	57	4740.4			3	70
Stack1-100.tif	4	58	2405.1			4	70
Stack1-100.tif	4	59	2405.6			5	70
Stack1-100.tif	4	60	2399.14			6	70
Stack1-100.tif	4	61	2413.75			7	70
Stack1-100.tif	4	62	2405.97			8	70
Stack1-100.tif	4	63	2384.36			9	70
Stack1-100.tif	4	64	2396.03			10	70
Stack1-100.tif	4	65	2404.15			11	70
Stack1-100.tif	4	66	2410.76			12	70
Stack1-100.tif	4	67	2411.1			13	70
Stack1-100.tif	4	68	2401.79			14	70
Stack1-100.tif	4	69	2410.28			15	70
Stack1-100.tif	4	70	2400.8			16	70
Stack1-100.tif	4	71	2408.65			17	70
Stack1-100.tif	4	72	2396			18	70
Stack1-100.tif	4	73	2045.36			19	70
Stack1-100.tif	4	74	2408.66			1	71
Stack1-100.tif	4	75	2394.52			2	71
Stack1-100.tif	4	76	2389.47			3	71
Stack1-100.tif	4	77	2408.19			4	71
Stack1-100.tif	4	78	2409.07			5	71
Stack1-100.tif	4	79	2428.24			6	71
Stack1-100.tif	4	80	2441.02			7	71
Stack1-100.tif	4	81	2493.4			8	71
Stack1-100.tif	4	82	2518.33			9	71
Stack1-100.tif	4	83	2557.86			10	71
Stack1-100.tif	4	84	2601.94			11	71
Stack1-100.tif	4	85	2635.16			12	71
Stack1-100.tif	4	86	2672.94			13	71
Stack1-100.tif	4	87	2720.14			14	71
Stack1-100.tif	4	88	2743.28			15	71
Stack1-100.tif	4	89	2765.95			16	71
Stack1-100.tif	4	90	2804.25			17	71
Stack1-100.tif	4	91	2835.9			18	71
Stack1-100.tif	4	92	2861.22			19	71
Stack1-100.tif	4	93	2870.78			1	72
Stack1-100.tif	4	94	2896.26			2	72
Stack1-100.tif	4	95	2917.83			3	72
Stack1-100.tif	4	96	2946.06			4	72
Stack1-100.tif	4	97	2952.93			5	72
Stack1-100.tif	4	98	2969.68			6	72
Stack1-100.tif	4	99	2991.82			7	72
Stack1-100.tif	4	100	3003.74			8	72
Stack101-200.tif	4	101	3019.09			9	72
Stack101-200.tif	4	102	3031.82			10	72
Stack101-200.tif	4	103	3057.88			11	72
Stack101-200.tif	4	104	3066.14			12	72
Stack101-200.tif	4	105	3077.83			13	72
Stack101-200.tif	4	106	3098.68			14	72
Stack101-200.tif	4	107	3117.41			15	72
Stack101-200.tif	4	108	3118.07			16	72
Stack101-200.tif	4	109	3112.48			17	72
Stack101-200.tif	4	110	3146.27			18	72
Stack101-200.tif	4	111	3143.12			19	72
Stack101-200.tif	4	112	3151.5			1	73
Stack101-200.tif	4	113	3160.96			2	73
Stack101-200.tif	4	114	3172.89			3	73
Stack101-200.tif	4	115	3157.27			4	73
Stack101-200.tif	4	116	3181.96			5	73
Stack101-200.tif	4	117	3184.49			6	73
Stack101-200.tif	4	118	3192.16			7	73
Stack101-200.tif	4	119	3189.33			8	73
Stack101-200.tif	4	120	3212.21			9	73
Stack101-200.tif	4	121	3200.76			10	73
Stack101-200.tif	4	122	3195.8			11	73
Stack101-200.tif	4	123	3212.12			12	73
Stack101-200.tif	4	124	3210.17			13	73
Stack101-200.tif	4	125	3219.63			14	73
Stack101-200.tif	4	126	3215.79			15	73
Stack101-200.tif	4	127	3215.32			16	73
Stack101-200.tif	4	128	3207.21			17	73
Stack101-200.tif	4	129	3219.52			18	73
Stack101-200.tif	4	130	3206.86			19	73
Stack101-200.tif	4	131	3211.77			1	74
Stack101-200.tif	4	132	3217.04			2	74
Stack101-200.tif	4	133	3229.74			3	74
Stack101-200.tif	4	134	3214.29			4	74
Stack101-200.tif	4	135	3218.16			5	74
Stack101-200.tif	4	136	3216.7			6	74
Stack101-200.tif	4	137	3212.26			7	74
Stack101-200.tif	4	138	3228.05			8	74
Stack101-200.tif	4	139	3212.55			9	74
Stack101-200.tif	4	140	3209.7			10	74
Stack101-200.tif	4	141	3218.49			11	74
Stack101-200.tif	4	142	3220.48			12	74
Stack101-200.tif	4	143	3211.12			13	74
Stack101-200.tif	4	144	3206.57			14	74
Stack101-200.tif	4	145	5780.98			15	74
Stack101-200.tif	4	146	4190.67			16	74
Stack101-200.tif	4	147	3215.63			17	74
Stack101-200.tif	4	148	3215.7			18	74
Stack101-200.tif	4	149	3211.33			19	74
Stack101-200.tif	4	150	3223.43			1	75
Stack101-200.tif	4	151	3214.46			2	75
Stack101-200.tif	4	152	3214.81			3	75
Stack101-200.tif	4	153	3223.62			4	75
Stack101-200.tif	4	154	3203.32			5	75
Stack101-200.tif	4	155	3212.61			6	75
Stack101-200.tif	4	156	3218.05			7	75
Stack101-200.tif	4	157	3218.8			8	75
Stack101-200.tif	4	158	3213.79			9	75
Stack101-200.tif	4	159	3207.38			10	75
Stack101-200.tif	4	160	3202.12			11	75
Stack101-200.tif	4	161	3209.59			12	75
Stack101-200.tif	4	162	3200.4			13	75
Stack101-200.tif	4	163	3208.57			14	75
Stack101-200.tif	4	164	3219.21			15	75
Stack101-200.tif	4	165	3200.67			16	75
Stack101-200.tif	4	166	3209.39			17	75
Stack101-200.tif	4	167	3206.07			18	75
Stack101-200.tif	4	168	3212.49			19	75
Stack101-200.tif	4	169	3213.82			1	76
Stack101-200.tif	4	170	3215.61			2	76
Stack101-200.tif	4	171	3205.55			3	76
Stack101-200.tif	4	172	3211.22			4	76
Stack101-200.tif	4	173	3205.41			5	76
Stack101-200.tif	4	174	3219.14			6	76
Stack101-200.tif	4	175	3214.23			7	76
Stack101-200.tif	4	176	3221.31			8	76
Stack101-200.tif	4	177	3228.24			9	76
Stack101-200.tif	4	178	3210.46			10	76
Stack101-200.tif	4	179	3207.57			11	76
Stack101-200.tif	4	180	3212.29			12	76
Stack101-200.tif	4	181	3215.03			13	76
Stack101-200.tif	4	182	3207.77			14	76
Stack101-200.tif	4	183	3208.41			15	76
Stack101-200.tif	4	184	3222.16			16	76
Stack101-200.tif	4	185	3214.32			17	76
Stack101-200.tif	4	186	3206.04			18	76
Stack101-200.tif	4	187	3222.85			19	76
Stack101-200.tif	4	188	3221.79			1	77
Stack101-200.tif	4	189	3209.99			2	77
Stack101-200.tif	4	190	3208.55			3	77
Stack101-200.tif	4	191	3226.95			4	77
Stack101-200.tif	4	192	3224.03			5	77
Stack101-200.tif	4	193	3217.74			6	77
Stack101-200.tif	4	194	3213.3			7	77
Stack101-200.tif	4	195	3208.25			8	77
Stack101-200.tif	4	196	3221.03			9	77
Stack101-200.tif	4	197	3226.39			10	77
Stack101-200.tif	4	198	3223.21			11	77
Stack101-200.tif	4	199	3219.07			12	77
Stack101-200.tif	4	200	3208.61			13	77
Stack201-300.tif	4	201	3204.18			14	77
Stack201-300.tif	4	202	3204.68			15	77
Stack201-300.tif	4	203	3229.87			16	77
Stack201-300.tif	4	204	3212.66			17	77
Stack201-300.tif	4	205	3200.43			18	77
Stack201-300.tif	4	206	3210.22			19	77
Stack201-300.tif	4	207	3217.97			1	78
Stack201-300.tif	4	208	3213.51			2	78
Stack201-300.tif	4	209	3214.31			3	78
Stack201-300.tif	4	210	3203.83			4	78
Stack201-300.tif	4	211	3197.04			5	78
Stack201-300.tif	4	212	3208.51			6	78
Stack201-300.tif	4	213	3194.6			7	78
Stack201-300.tif	4	214	3200.99			8	78
Stack201-300.tif	4	215	3204.07			9	78
Stack201-300.tif	4	216	3201.11			10	78
Stack201-300.tif	4	217	3206.44			11	78
Stack201-300.tif	4	218	3186.23			12	78
Stack201-300.tif	4	219	3202.13			13	78
Stack201-300.tif	4	220	3189.74			14	78
Stack201-300.tif	4	221	3194.44			15	78
Stack201-300.tif	4	222	3184.49			16	78
Stack201-300.tif	4	223	3202.83			17	78
Stack201-300.tif	4	224	3196.21			18	78
Stack201-300.tif	4	225	3180.33			19	78
Stack201-300.tif	4	226	3181.88			1	79
Stack201-300.tif	4	227	3185.85			2	79
Stack201-300.tif	4	228	3195.1			3	79
Stack201-300.tif	4	229	3176.15			4	79
Stack201-300.tif	4	230	3182.14			5	79
Stack201-300.tif	4	231	3186.69			6	79
Stack201-300.tif	4	232	3183.18			7	79
Stack201-300.tif	4	233	3172.67			8	79
Stack201-300.tif	4	234	3175.96			9	79
Stack201-300.tif	4	235	3167.19			10	79
Stack201-300.tif	4	236	3165.23			11	79
Stack201-300.tif	4	237	3171.06			12	79
Stack201-300.tif	4	238	3163.67			13	79
Stack201-300.tif	4	239	3168.2			14	79
Stack201-300.tif	4	240	3171.83			15	79
Stack201-300.tif	4	241	3154.2			16	79
Stack201-300.tif	4	242	3172.61			17	79
Stack201-300.tif	4	243	3157.01			18	79
Stack201-300.tif	4	244	3149.65			19	79
Stack201-300.tif	4	245	3146.52			1	80
Stack201-300.tif	4	246	3131.57			2	80
Stack201-300.tif	4	247	3156.03			3	80
Stack201-300.tif	4	248	3139.98			4	80
Stack201-300.tif	4	249	3148.83			5	80
Stack201-300.tif	4	250	3138.07			6	80
Stack201-300.tif	4	251	3120.67			7	80
Stack201-300.tif	4	252	3135.87			8	80
Stack201-300.tif	4	253	3131.47			9	80
Stack201-300.tif	4	254	3140			10	80
Stack201-300.tif	4	255	3136.27			11	80
Stack201-300.tif	4	256	3132.65			12	80
Stack201-300.tif	4	257	3131.97			13	80
Stack201-300.tif	4	258	3136.69			14	80
Stack201-300.tif	4	259	3120.48			15	80
Stack201-300.tif	4	260	3119.45			16	80
Stack201-300.tif	4	261	3109.49			17	80
Stack201-300.tif	4	262	3118			18	80
Stack201-300.tif	4	263	3104.82			19	80
Stack201-300.tif	4	264	3124.96			1	81
Stack201-300.tif	4	265	3111.83			2	81
Stack201-300.tif	4	266	3110.09			3	81
Stack201-300.tif	4	267	3109.3			4	81
Stack201-300.tif	4	268	3107.87			5	81
Stack201-300.tif	4	269	3108.75			6	81
Stack201-300.tif	4	270	3097.07			7	81
Stack201-300.tif	4	271	3100.86			8	81
Stack201-300.tif	4	272	3110.61			9	81
Stack201-300.tif	4	273	3104.01			10	81
Stack201-300.tif	4	274	3082.48			11	81
Stack201-300.tif	4	275	3100.53			12	81
Stack201-300.tif	4	276	3083.65			13	81
Stack201-300.tif	4	277	3082.88			14	81
Stack201-300.tif	4	278	3082.35			15	81
Stack201-300.tif	4	279	3079.08			16	81
Stack201-300.tif	4	280	3090.34			17	81
Stack201-300.tif	4	281	3080.46			18	81
Stack201-300.tif	4	282	3070.93			19	81
Stack201-300.tif	4	283	3072.91			1	82
Stack201-300.tif	4	284	3070.24			2	82
Stack201-300.tif	4	285	3078.69			3	82
Stack201-300.tif	4	286	3062.99			4	82
Stack201-300.tif	4	287	3060.34			5	82
Stack201-300.tif	4	288	3059.1			6	82
Stack201-300.tif	4	289	3059.15			7	82
Stack201-300.tif	4	290	3059.9			8	82
Stack201-300.tif	4	291	3058.78			9	82
Stack201-300.tif	4	292	3061.44			10	82
Stack201-300.tif	4	293	3052.12			11	82
Stack201-300.tif	4	294	3047.66			12	82
Stack201-300.tif	4	295	3046.4			13	82
Stack201-300.tif	4	296	3047.67			14	82
Stack201-300.tif	4	297	3044.96			15	82
Stack201-300.tif	4	298	3048.68			16	82
Stack201-300.tif	4	299	3033.73			17	82
Stack201-300.tif	4	300	3036.4			18	82
Stack301-419.tif	4	301	3034.52			19	82
Stack301-419.tif	4	302	3039.91			1	83
Stack301-419.tif	4	303	3032.75			2	83
Stack301-419.tif	4	304	3032.56			3	83
Stack301-419.tif	4	305	3013.56			4	83
Stack301-419.tif	4	306	3033.86			5	83
Stack301-419.tif	4	307	3030.1			6	83
Stack301-419.tif	4	308	3022.53			7	83
Stack301-419.tif	4	309	3032.51			8	83
Stack301-419.tif	4	310	3027.04			9	83
Stack301-419.tif	4	311	3019.7			10	83
Stack301-419.tif	4	312	3015.96			11	83
Stack301-419.tif	4	313	3023			12	83
Stack301-419.tif	4	314	3010.47			13	83
Stack301-419.tif	4	315	3023.92			14	83
Stack301-419.tif	4	316	3018.75			15	83
Stack301-419.tif	4	317	3005.16			16	83
Stack301-419.tif	4	318	3011.63			17	83
Stack301-419.tif	4	319	3022.23			18	83
Stack301-419.tif	4	320	3005.6			19	83
Stack301-419.tif	4	321	3006.4			1	84
Stack301-419.tif	4	322	3010.1			2	84
Stack301-419.tif	4	323	2998.04			3	84
Stack301-419.tif	4	324	3000.19			4	84
Stack301-419.tif	4	325	3002.54			5	84
Stack301-419.tif	4	326	3001.81			6	84
Stack301-419.tif	4	327	2994.65			7	84
Stack301-419.tif	4	328	2991.96			8	84
Stack301-419.tif	4	329	2988.84			9	84
Stack301-419.tif	4	330	2988.77			10	84
Stack301-419.tif	4	331	2997.38			11	84
Stack301-419.tif	4	332	2977.22			12	84
Stack301-419.tif	4	333	2978.68			13	84
Stack301-419.tif	4	334	2984.17			14	84
Stack301-419.tif	4	335	2984.77			15	84
Stack301-419.tif	4	336	2974.77			16	84
Stack301-419.tif	4	337	2982.18			17	84
Stack301-419.tif	4	338	2968.64			18	84
Stack301-419.tif	4	339	2977.29			19	84
Stack301-419.tif	4	340	2968.63			1	85
Stack301-419.tif	4	341	2967.29			2	85
Stack301-419.tif	4	342	2966.57			3	85
Stack301-419.tif	4	343	2964.47			4	85
Stack301-419.tif	4	344	2961.38			5	85
Stack301-419.tif	4	345	2968.22			6	85
Stack301-419.tif	4	346	2967.21			7	85
Stack301-419.tif	4	347	2961.76			8	85
Stack301-419.tif	4	348	2970.82			9	85
Stack301-419.tif	4	349	2976.39			10	85
Stack301-419.tif	4	350	2968.7			11	85
Stack301-419.tif	4	351	2975.97			12	85
Stack301-419.tif	4	352	2957.97			13	85
Stack301-419.tif	4	353	2954.47			14	85
Stack301-419.tif	4	354	2958.53			15	85
Stack301-419.tif	4	355	2957.17			16	85
Stack301-419.tif	4	356	2962.05			17	85
Stack301-419.tif	4	357	2962.3			18	85
Stack301-419.tif	4	358	2970.83			19	85
Stack301-419.tif	4	359	2946.45			1	86
Stack301-419.tif	4	360	2956.15			2	86
Stack301-419.tif	4	361	2942.69			3	86
Stack301-419.tif	4	362	2948.8			4	86
Stack301-419.tif	4	363	2955.41			5	86
Stack301-419.tif	4	364	2954.34			6	86
Stack301-419.tif	4	365	2942.77			7	86
Stack301-419.tif	4	366	2945.73			8	86
Stack301-419.tif	4	367	2948.55			9	86
Stack301-419.tif	4	368	2936.54			10	86
Stack301-419.tif	4	369	2949.81			11	86
Stack301-419.tif	4	370	2941.18			12	86
Stack301-419.tif	4	371	2943.91			13	86
Stack301-419.tif	4	372	2931.48			14	86
Stack301-419.tif	4	373	2931.19			15	86
Stack301-419.tif	4	374	2930.42			16	86
Stack301-419.tif	4	375	2940.24			17	86
Stack301-419.tif	4	376	2926.19			18	86
Stack301-419.tif	4	377	2936.66			19	86
Stack301-419.tif	4	378	2930.04			1	87
Stack301-419.tif	4	379	2931.77			2	87
Stack301-419.tif	4	380	2927			3	87
Stack301-419.tif	4	381	2935.06			4	87
Stack301-419.tif	4	382	2932.97			5	87
Stack301-419.tif	4	383	2935.59			6	87
Stack301-419.tif	4	384	2928.45			7	87
Stack301-419.tif	4	385	2923.74			8	87
Stack301-419.tif	4	386	2922.76			9	87
Stack301-419.tif	4	387	2925.54			10	87
Stack301-419.tif	4	388	2922.26			11	87
Stack301-419.tif	4	389	2939.3			12	87
Stack301-419.tif	4	390	2927.81			13	87
Stack301-419.tif	4	391	2934.85			14	87
Stack301-419.tif	4	392	2933.99			15	87
Stack301-419.tif	4	393	2918.95			16	87
Stack301-419.tif	4	394	2928.52			17	87
Stack301-419.tif	4	395	2918.31			18	87
Stack301-419.tif	4	396	2907.95			19	87
Stack301-419.tif	4	397	2917.16			1	88
Stack301-419.tif	4	398	2926.49			2	88
Stack301-419.tif	4	399	2923.36			3	88
Stack301-419.tif	4	400	2920.79			4	88
Stack301-419.tif	4	401	2916.68			5	88
Stack301-419.tif	4	402	2913.63			6	88
Stack301-419.tif	4	403	2923.39			7	88
Stack301-419.tif	4	404	2905.43			8	88
Stack301-419.tif	4	405	2912.27			9	88
Stack301-419.tif	4	406	2906.7			10	88
Stack301-419.tif	4	407	2913.47			11	88
Stack301-419.tif	4	408	2915.51			12	88
Stack301-419.tif	4	409	2918.4			13	88
Stack301-419.tif	4	410	2914.49			14	88
Stack301-419.tif	4	411	2894.11			15	88
Stack301-419.tif	4	412	2918.89			16	88
Stack301-419.tif	4	413	2912.42			17	88
Stack301-419.tif	4	414	2906.69			18	88
Stack301-419.tif	4	415	2913.54			19	88
Stack301-419.tif	4	416	2913.19			1	89
Stack301-419.tif	4	417	2898.15			2	89
Stack301-419.tif	4	418	2897.79			3	89
Stack301-419.tif	4	419	2902.35			4	89
Stack1-100.tif	5	1	1988.87			5	89
Stack1-100.tif	5	2	1993.13			6	89
Stack1-100.tif	5	3	1988.23			7	89
Stack1-100.tif	5	4	1993.42			8	89
Stack1-100.tif	5	5	1986.6			9	89
Stack1-100.tif	5	6	1990.09			10	89
Stack1-100.tif	5	7	1996.35			11	89
Stack1-100.tif	5	8	1991.74			12	89
Stack1-100.tif	5	9	1995.47			13	89
Stack1-100.tif	5	10	2000.68			14	89
Stack1-100.tif	5	11	1993.96			15	89
Stack1-100.tif	5	12	1991.76			16	89
Stack1-100.tif	5	13	1991.81			17	89
Stack1-100.tif	5	14	1999.45			18	89
Stack1-100.tif	5	15	2004.11			19	89
Stack1-100.tif	5	16	1999.71			1	90
Stack1-100.tif	5	17	2007.5			2	90
Stack1-100.tif	5	18	2013.92			3	90
Stack1-100.tif	5	19	2005.4			4	90
Stack1-100.tif	5	20	2014.52			5	90
Stack1-100.tif	5	21	2011.64			6	90
Stack1-100.tif	5	22	1999.69			7	90
Stack1-100.tif	5	23	2021.26			8	90
Stack1-100.tif	5	24	1039.12			9	90
Stack1-100.tif	5	25	2035.68			10	90
Stack1-100.tif	5	26	1354.16			11	90
Stack1-100.tif	5	27	-33.2559			12	90
Stack1-100.tif	5	28	51.8019			13	90
Stack1-100.tif	5	29	2114.21			14	90
Stack1-100.tif	5	30	2076.8			15	90
Stack1-100.tif	5	31	2072.29			16	90
Stack1-100.tif	5	32	2033.35			17	90
Stack1-100.tif	5	33	1958.37			18	90
Stack1-100.tif	5	34	2051			19	90
Stack1-100.tif	5	35	2065.29			1	91
Stack1-100.tif	5	36	2075.28			2	91
Stack1-100.tif	5	37	259.384			3	91
Stack1-100.tif	5	38	2062.55			4	91
Stack1-100.tif	5	39	2089.24			5	91
Stack1-100.tif	5	40	2087.56			6	91
Stack1-100.tif	5	41	2067.28			7	91
Stack1-100.tif	5	42	2075.09			8	91
Stack1-100.tif	5	43	2067.9			9	91
Stack1-100.tif	5	44	2077.8			10	91
Stack1-100.tif	5	45	2071.54			11	91
Stack1-100.tif	5	46	2070.77			12	91
Stack1-100.tif	5	47	2073.67			13	91
Stack1-100.tif	5	48	2077.49			14	91
Stack1-100.tif	5	49	2070.99			15	91
Stack1-100.tif	5	50	2062.25			16	91
Stack1-100.tif	5	51	2083.95			17	91
Stack1-100.tif	5	52	2065.22			18	91
Stack1-100.tif	5	53	2080.31			19	91
Stack1-100.tif	5	54	1633.69			1	92
Stack1-100.tif	5	55	32.5909			2	92
Stack1-100.tif	5	56	2007.69			3	92
Stack1-100.tif	5	57	2054.87			4	92
Stack1-100.tif	5	58	2050.5			5	92
Stack1-100.tif	5	59	2068.92			6	92
Stack1-100.tif	5	60	2074			7	92
Stack1-100.tif	5	61	2059.92			8	92
Stack1-100.tif	5	62	2068.33			9	92
Stack1-100.tif	5	63	2067.21			10	92
Stack1-100.tif	5	64	2080.7			11	92
Stack1-100.tif	5	65	2088.24			12	92
Stack1-100.tif	5	66	2049.41			13	92
Stack1-100.tif	5	67	2059.77			14	92
Stack1-100.tif	5	68	2053.99			15	92
Stack1-100.tif	5	69	2037.66			16	92
Stack1-100.tif	5	70	2231.54			17	92
Stack1-100.tif	5	71	2051.37			18	92
Stack1-100.tif	5	72	3896.54			19	92
Stack1-100.tif	5	73	1945.28			1	93
Stack1-100.tif	5	74	2054.04			2	93
Stack1-100.tif	5	75	2072.92			3	93
Stack1-100.tif	5	76	2088.27			4	93
Stack1-100.tif	5	77	2105.09			5	93
Stack1-100.tif	5	78	2121.12			6	93
Stack1-100.tif	5	79	2136.32			7	93
Stack1-100.tif	5	80	2149.79			8	93
Stack1-100.tif	5	81	2160.73			9	93
Stack1-100.tif	5	82	2175.12			10	93
Stack1-100.tif	5	83	2189.7			11	93
Stack1-100.tif	5	84	2197.31			12	93
Stack1-100.tif	5	85	2232.75			13	93
Stack1-100.tif	5	86	2230.94			14	93
Stack1-100.tif	5	87	2261.63			15	93
Stack1-100.tif	5	88	2295.13			16	93
Stack1-100.tif	5	89	2306.92			17	93
Stack1-100.tif	5	90	2331.34			18	93
Stack1-100.tif	5	91	2344.07			19	93
Stack1-100.tif	5	92	2360.67			1	94
Stack1-100.tif	5	93	2387.27			2	94
Stack1-100.tif	5	94	2398.9			3	94
Stack1-100.tif	5	95	2434.06			4	94
Stack1-100.tif	5	96	2443.41			5	94
Stack1-100.tif	5	97	2471.58			6	94
Stack1-100.tif	5	98	2478.78			7	94
Stack1-100.tif	5	99	2503.36			8	94
Stack1-100.tif	5	100	2490.29			9	94
Stack101-200.tif	5	101	2528.32			10	94
Stack101-200.tif	5	102	2537.11			11	94
Stack101-200.tif	5	103	2551.76			12	94
Stack101-200.tif	5	104	2561.62			13	94
Stack101-200.tif	5	105	2562.89			14	94
Stack101-200.tif	5	106	2580.33			15	94
Stack101-200.tif	5	107	2589.79			16	94
Stack101-200.tif	5	108	2604.53			17	94
Stack101-200.tif	5	109	2623.33			18	94
Stack101-200.tif	5	110	2630.95			19	94
Stack101-200.tif	5	111	2658.61			1	95
Stack101-200.tif	5	112	2659.97			2	95
Stack101-200.tif	5	113	2676.92			3	95
Stack101-200.tif	5	114	2681.21			4	95
Stack101-200.tif	5	115	2690.35			5	95
Stack101-200.tif	5	116	2681.5			6	95
Stack101-200.tif	5	117	2693.5			7	95
Stack101-200.tif	5	118	2710.79			8	95
Stack101-200.tif	5	119	2712.22			9	95
Stack101-200.tif	5	120	2722.85			10	95
Stack101-200.tif	5	121	2729.74			11	95
Stack101-200.tif	5	122	2731.96			12	95
Stack101-200.tif	5	123	2740.42			13	95
Stack101-200.tif	5	124	2735.21			14	95
Stack101-200.tif	5	125	2729.23			15	95
Stack101-200.tif	5	126	2747.27			16	95
Stack101-200.tif	5	127	2750.99			17	95
Stack101-200.tif	5	128	2760.45			18	95
Stack101-200.tif	5	129	2766.55			19	95
Stack101-200.tif	5	130	2748.56			1	96
Stack101-200.tif	5	131	2759.12			2	96
Stack101-200.tif	5	132	2760.83			3	96
Stack101-200.tif	5	133	2759.01			4	96
Stack101-200.tif	5	134	2783.38			5	96
Stack101-200.tif	5	135	2779.22			6	96
Stack101-200.tif	5	136	2774.14			7	96
Stack101-200.tif	5	137	2784.02			8	96
Stack101-200.tif	5	138	2780.33			9	96
Stack101-200.tif	5	139	2790.81			10	96
Stack101-200.tif	5	140	2782.96			11	96
Stack101-200.tif	5	141	2788.94			12	96
Stack101-200.tif	5	142	2786.66			13	96
Stack101-200.tif	5	143	2787.99			14	96
Stack101-200.tif	5	144	2788.33			15	96
Stack101-200.tif	5	145	2789.48			16	96
Stack101-200.tif	5	146	2799.38			17	96
Stack101-200.tif	5	147	2810.38			18	96
Stack101-200.tif	5	148	2802.74			19	96
Stack101-200.tif	5	149	2808.72			1	97
Stack101-200.tif	5	150	2814.85			2	97
Stack101-200.tif	5	151	2814.97			3	97
Stack101-200.tif	5	152	2805.39			4	97
Stack101-200.tif	5	153	2808.52			5	97
Stack101-200.tif	5	154	2821.11			6	97
Stack101-200.tif	5	155	2812.01			7	97
Stack101-200.tif	5	156	2813.22			8	97
Stack101-200.tif	5	157	2814.8			9	97
Stack101-200.tif	5	158	2812.44			10	97
Stack101-200.tif	5	159	2817.88			11	97
Stack101-200.tif	5	160	2817.87			12	97
Stack101-200.tif	5	161	2818.11			13	97
Stack101-200.tif	5	162	2814.63			14	97
Stack101-200.tif	5	163	2812.48			15	97
Stack101-200.tif	5	164	2820.04			16	97
Stack101-200.tif	5	165	2813.85			17	97
Stack101-200.tif	5	166	2818.02			18	97
Stack101-200.tif	5	167	2834.65			19	97
Stack101-200.tif	5	168	2823.95			1	98
Stack101-200.tif	5	169	2822.93			2	98
Stack101-200.tif	5	170	2826.16			3	98
Stack101-200.tif	5	171	2835.62			4	98
Stack101-200.tif	5	172	2831.44			5	98
Stack101-200.tif	5	173	2825.75			6	98
Stack101-200.tif	5	174	2830.77			7	98
Stack101-200.tif	5	175	2836.53			8	98
Stack101-200.tif	5	176	2835.89			9	98
Stack101-200.tif	5	177	2841.13			10	98
Stack101-200.tif	5	178	2836.06			11	98
Stack101-200.tif	5	179	2838.34			12	98
Stack101-200.tif	5	180	2847.22			13	98
Stack101-200.tif	5	181	2851.65			14	98
Stack101-200.tif	5	182	2852.68			15	98
Stack101-200.tif	5	183	2855.03			16	98
Stack101-200.tif	5	184	2859.78			17	98
Stack101-200.tif	5	185	2859.95			18	98
Stack101-200.tif	5	186	2853			19	98
Stack101-200.tif	5	187	2860.41			1	99
Stack101-200.tif	5	188	2866.1			2	99
Stack101-200.tif	5	189	2867.35			3	99
Stack101-200.tif	5	190	2857.99			4	99
Stack101-200.tif	5	191	2861.35			5	99
Stack101-200.tif	5	192	2868.77			6	99
Stack101-200.tif	5	193	2868.59			7	99
Stack101-200.tif	5	194	2859.18			8	99
Stack101-200.tif	5	195	2865.3			9	99
Stack101-200.tif	5	196	2877.55			10	99
Stack101-200.tif	5	197	2866.04			11	99
Stack101-200.tif	5	198	2864.38			12	99
Stack101-200.tif	5	199	2868.89			13	99
Stack101-200.tif	5	200	2876.41			14	99
Stack201-300.tif	5	201	2883.43			15	99
Stack201-300.tif	5	202	2878.03			16	99
Stack201-300.tif	5	203	2880.67			17	99
Stack201-300.tif	5	204	2880.19			18	99
Stack201-300.tif	5	205	2882.11			19	99
Stack201-300.tif	5	206	2872.98			1	100
Stack201-300.tif	5	207	2890.11			2	100
Stack201-300.tif	5	208	2873.71			3	100
Stack201-300.tif	5	209	2888.71			4	100
Stack201-300.tif	5	210	2891.56			5	100
Stack201-300.tif	5	211	2897.98			6	100
Stack201-300.tif	5	212	2893.3			7	100
Stack201-300.tif	5	213	2888.08			8	100
Stack201-300.tif	5	214	2893.43			9	100
Stack201-300.tif	5	215	2893.17			10	100
Stack201-300.tif	5	216	2894.76			11	100
Stack201-300.tif	5	217	2898.09			12	100
Stack201-300.tif	5	218	2897.72			13	100
Stack201-300.tif	5	219	2901.05			14	100
Stack201-300.tif	5	220	2897.54			15	100
Stack201-300.tif	5	221	2899.91			16	100
Stack201-300.tif	5	222	2898.68			17	100
Stack201-300.tif	5	223	2908.12			18	100
Stack201-300.tif	5	224	2903.62			19	100
Stack201-300.tif	5	225	2893.75			1	101
Stack201-300.tif	5	226	2897.82			2	101
Stack201-300.tif	5	227	2889.78			3	101
Stack201-300.tif	5	228	2906.9			4	101
Stack201-300.tif	5	229	2893.09			5	101
Stack201-300.tif	5	230	2890.46			6	101
Stack201-300.tif	5	231	2888.92			7	101
Stack201-300.tif	5	232	2894.97			8	101
Stack201-300.tif	5	233	2895.98			9	101
Stack201-300.tif	5	234	2904.96			10	101
Stack201-300.tif	5	235	2895.76			11	101
Stack201-300.tif	5	236	2900.56			12	101
Stack201-300.tif	5	237	2895.29			13	101
Stack201-300.tif	5	238	2913.97			14	101
Stack201-300.tif	5	239	2897.32			15	101
Stack201-300.tif	5	240	2887.9			16	101
Stack201-300.tif	5	241	2909.33			17	101
Stack201-300.tif	5	242	2910.62			18	101
Stack201-300.tif	5	243	2907			19	101
Stack201-300.tif	5	244	2904.29			1	102
Stack201-300.tif	5	245	2914.59			2	102
Stack201-300.tif	5	246	2896.77			3	102
Stack201-300.tif	5	247	2902.07			4	102
Stack201-300.tif	5	248	2901.29			5	102
Stack201-300.tif	5	249	2909.64			6	102
Stack201-300.tif	5	250	2908.44			7	102
Stack201-300.tif	5	251	2900.73			8	102
Stack201-300.tif	5	252	2906.58			9	102
Stack201-300.tif	5	253	2890.63			10	102
Stack201-300.tif	5	254	2903.04			11	102
Stack201-300.tif	5	255	2904.11			12	102
Stack201-300.tif	5	256	2899.59			13	102
Stack201-300.tif	5	257	2897.31			14	102
Stack201-300.tif	5	258	2900.13			15	102
Stack201-300.tif	5	259	2903.15			16	102
Stack201-300.tif	5	260	2895.17			17	102
Stack201-300.tif	5	261	2895.3			18	102
Stack201-300.tif	5	262	2890.28			19	102
Stack201-300.tif	5	263	2908.6			1	103
Stack201-300.tif	5	264	2898.61			2	103
Stack201-300.tif	5	265	2894.72			3	103
Stack201-300.tif	5	266	2885.27			4	103
Stack201-300.tif	5	267	2893.47			5	103
Stack201-300.tif	5	268	2900.83			6	103
Stack201-300.tif	5	269	2896.13			7	103
Stack201-300.tif	5	270	2897.75			8	103
Stack201-300.tif	5	271	2905.63			9	103
Stack201-300.tif	5	272	2893.88			10	103
Stack201-300.tif	5	273	2892.99			11	103
Stack201-300.tif	5	274	2897.52			12	103
Stack201-300.tif	5	275	2892.28			13	103
Stack201-300.tif	5	276	2882.7			14	103
Stack201-300.tif	5	277	2890.49			15	103
Stack201-300.tif	5	278	2891.39			16	103
Stack201-300.tif	5	279	2889.2			17	103
Stack201-300.tif	5	280	2892.09			18	103
Stack201-300.tif	5	281	2896.88			19	103
Stack201-300.tif	5	282	2881.4			1	104
Stack201-300.tif	5	283	2889.45			2	104
Stack201-300.tif	5	284	2888.64			3	104
Stack201-300.tif	5	285	2883.54			4	104
Stack201-300.tif	5	286	2891.89			5	104
Stack201-300.tif	5	287	2893.11			6	104
Stack201-300.tif	5	288	2880.87			7	104
Stack201-300.tif	5	289	2886.01			8	104
Stack201-300.tif	5	290	2897.97			9	104
Stack201-300.tif	5	291	2886.35			10	104
Stack201-300.tif	5	292	2893.02			11	104
Stack201-300.tif	5	293	2894.32			12	104
Stack201-300.tif	5	294	2880.05			13	104
Stack201-300.tif	5	295	2886.21			14	104
Stack201-300.tif	5	296	2878.84			15	104
Stack201-300.tif	5	297	2880.44			16	104
Stack201-300.tif	5	298	2883.84			17	104
Stack201-300.tif	5	299	2868.83			18	104
Stack201-300.tif	5	300	2866.84			19	104
Stack301-419.tif	5	301	2875.03			1	105
Stack301-419.tif	5	302	2874.5			2	105
Stack301-419.tif	5	303	2862.67			3	105
Stack301-419.tif	5	304	2880.37			4	105
Stack301-419.tif	5	305	2867.28			5	105
Stack301-419.tif	5	306	2865.3			6	105
Stack301-419.tif	5	307	2866.98			7	105
Stack301-419.tif	5	308	2871.47			8	105
Stack301-419.tif	5	309	2867.02			9	105
Stack301-419.tif	5	310	2866.69			10	105
Stack301-419.tif	5	311	2872.06			11	105
Stack301-419.tif	5	312	2861.64			12	105
Stack301-419.tif	5	313	2862.9			13	105
Stack301-419.tif	5	314	2864.92			14	105
Stack301-419.tif	5	315	2856.6			15	105
Stack301-419.tif	5	316	2862.07			16	105
Stack301-419.tif	5	317	2856.05			17	105
Stack301-419.tif	5	318	2858.1			18	105
Stack301-419.tif	5	319	2865.48			19	105
Stack301-419.tif	5	320	2861.6			1	106
Stack301-419.tif	5	321	2857.57			2	106
Stack301-419.tif	5	322	2851.86			3	106
Stack301-419.tif	5	323	2860.69			4	106
[truncated: 5,962 more rows]

## Sheet: Sheet2
	1	2	3	4	5	6	7	8	9	10	11	12	13	14	15	16	17	18	19
1	2270.91	1917.85	2579.9	2348.6	1988.87	2350.79	2015.6	2523	2369.6	2692.97	1854.15	2694.53	2235.65	1853.91	1574.92	2320.46	1580.59	1752.4	2506.33
2	2259.26	1900.62	2579.6	2345.52	1993.13	2361.96	2006.07	2518.87	2358.82	2680.64	1831.15	2708.37	2220.14	1852.22	1583.77	2322.81	1575.94	1741.34	2511.58
3	2274.34	1922.32	2565.83	2351.06	1988.23	2355.74	2003.82	2524.4	2358.75	2687.16	1841.24	2704.46	2230.58	1870.19	1582.42	2318.79	1577.93	1758.4	2509.22
4	2289.31	1919.66	2581.41	2354.3	1993.42	2356.63	1998.06	2527.07	2366.65	2690.18	1845.59	2710.13	2225.26	1867.18	1579.41	2328.53	1580.87	1735.8	2529.6
5	2273.29	1915.96	2584.18	2356.17	1986.6	2369.2	2015.02	2537.17	2367.34	2681.31	1854.04	2696.69	2247.91	1872.57	1599.77	2323.36	1588.49	1746.34	2530.12
6	2268.47	1902.1	2576.98	2354.39	1990.09	2391.46	2034.27	2538.39	2349.48	2702.41	1861.18	2712.87	2231.5	1872.23	1586.66	2327.71	1582.14	1754.31	2523.77
7	2286.82	1917.9	2578.08	2347.22	1996.35	2383.85	2025.9	2534.84	2363.57	2688.62	1851.63	2710.06	2230.31	1879.43	1591.79	2335.62	1591.37	1746.26	2517.12
8	2276.44	1918	2579.31	2357.19	1991.74	2378.94	2011.88	2537.34	2361.01	2691.39	1848.73	2709.32	2230.72	1877.09	1571.47	2323.36	1585.58	1751.89	2527
9	2297.72	1918.22	2585.7	2361.6	1995.47	2391.57	2017.72	2540.58	2364.35	2681.61	1846.13	2726.54	2231.1	1876.66	1585.22	2344.3	1586.31	1748.4	2527.65
10	2289.49	1923.48	2595.74	2367.04	2000.68	2370.99	2010.62	2558.57	2374.14	2697.23	1866.3	2723.18	2237.77	1862.54	1596.4	2329.31	1588.03	1748.5	2528.81
11	2294.24	1915.56	2587.76	2375.41	1993.96	2388.87	2021.41	2547.82	2367.62	2692.11	1846.62	2710.22	2238.46	1891.88	1584.27	2338.24	1588.85	1751.46	2524.35
12	2279.55	1907.08	2601.36	2353.49	1991.76	2381.44	2012.55	2545.04	2389.01	2694.35	1840.21	2727.24	2235.5	1892.19	1588.03	2340.62	1580.68	1746.51	2528.77
13	2276.76	1911.35	2590.75	2367.21	1991.81	2380.64	2010.35	2550.78	2370.18	2686.34	1845.63	2725.69	2239.77	1889.19	1590.7	2349.32	1593.11	1762.57	2533.37
14	2296.07	1918.53	2590.42	2363.71	1999.45	2378.06	2009.94	2561.93	2373.74	2689.51	1857.25	2714.38	2244.41	1890.92	1590.38	2341.91	1592.35	1756.53	2537.44
15	2268.69	1927.12	2602.78	2353.02	2004.11	2382.75	2007.74	2551.41	2376.03	2694.84	1850.43	2740.31	2257.14	1894.9	1580.23	2360.07	1584.17	1764.94	2536.88
16	2297	1921.21	2592.84	2357.05	1999.71	2390.18	2006.01	2550.26	2393.8	2707.08	1860.98	2715.54	2257.09	1901.79	1592.73	2349.77	1593.36	1780.28	2537.82
17	2298.94	1928.58	2600.96	2385.45	2007.5	2404.32	2008.84	2555.75	2380.25	2719.64	1864.04	2732.22	2253.23	1899.28	1582.92	2360.46	1595.11	1766.54	2532.89
18	2293.64	1923.9	2616.13	2384.25	2013.92	2402.37	2014.4	2562.89	2382.08	2712.09	1860.36	2727.39	2255.19	1895.87	1588.9	2352.54	1603.88	1763.42	2540.04
19	2287.63	1937.09	2594.92	2363.59	2005.4	2404.11	2013.79	2566.85	2385.29	2721.45	1880.37	2740.84	2260.24	1913.48	1592.55	2364.88	1589.98	1770.86	2561.42
20	2292.98	1952.35	2610.74	2380.57	2014.52	2401.36	2012.94	2566.14	2391.2	2737.16	1873.28	2739.59	2242.47	1914.92	1591.05	2368.57	1612.82	1768.55	2548.48
21	2313.44	1946.33	2607.18	2377.35	2011.64	2404.26	2006.92	2557.61	2402.23	2719.46	1881.09	2747.66	2252.38	1911.78	1587.94	2363.73	1601.8	1771.04	2544.35
22	2299.35	1947.16	2615.17	2374.06	1999.69	2424.69	2022.52	2567.34	2407.72	2723.42	1864.09	2748.53	2265.61	1909.34	1569.33	2366.59	1614.01	1777.14	2564.7
23	2314.34	1955.41	2614.38	2385.27	2021.26	2441.62	2046.03	2588.21	2431.52	2737.8	1874.56	2758.07	2257.85	1916.53	1576.28	2364.82	1604.8	1782.7	2557.86
24
25	2333.05	1968.79	2641.74	2398.72	2035.68	2432.53	2043.67	2603.97	2443.76	2751.38	1881.56	2776.19	2275.95	1933.02	1586.93	2402.37	1614.02	1787.16	2578.63
26
27
28
29	2388.51	2012.59	2682.15	2445.76		2489.94	2106.69		2494.38	2814.96		2831.54	2327.67	1952.48			1649.31	1853.21	2631.34
30	2363.15	1988.71	2659.4	2422.25	2076.8	2478.47	2095.87	2636.37	2477.04	2786.86		2805.87	2311.93	1929.83		2437.2	1636.61	1830.69	2599.42
31	2343.14	1987.09	2648.1	2427.06	2072.29	2483.5	2089.88	2644.71	2478.3	2774.82		2803.3	2306.35	1950.54	1590.77	2432.69	1615.97	1830.14	2633.08
32	2341.02	1952.74	2626.1	2408.38	2033.35	2464.9	2090.22	2607.91	2452.07	2768.98	1889.39	2790.85	2261.92	1933.03	1590.1	2383.44	1628.43	1775.76
33	2358.28	1984.05	2647.44	2433.06		2472.43	2079.05	2614.77	2434.22	2761.21	1898.95	2778.46	2280.41	1927.61	1581.89	2432.97	1631.74	1794.1	2593.21
34	2348.52	1975.47	2650.16	2418.48	2051	2443.35	2080.53	2616.19	2439.4		1898.36	2765.92	2266.25	1919.15	1597.42	2410.54	1623.03	1790.27	2590.66
35	2337.45	1987.47	2637.96	2424.78	2065.29	2493.36	2114.52	2634.11	2452.79	2775.19	1891.11	2789.79	2238.35	1944.27	1581.74	2440.48	1631.93	1823.86	2597.88
36		1913.47	2608.64	2419.6	2075.28	2445.95		2611.44	2440.13	2761.29	1889.51	2729.51		1795.7	1590.54	2421.17	1620.24	1806.49	2580.11
37
38		1960.43	2610.27		2062.55		2057.48		2413.66	2714.43	1875.41	2694.59	2246.42	1873.48	1603.41	2367.98	1599.39	1777.76	2535.59
39	2345.91	1999.22	2666.33	2423.15	2089.24	2445.02	2091.86	2627.71	2458.13	2768.22	1909.92	2800.25	2313.14	1937.76	1596.47	2431.53	1641.38	1831.26	2599.87
40	2367.5	1995.77	2676.37	2422.44	2087.56	2463.53	2091.1	2630.29	2456.16	2779.54	1906.11	2785.87	2318.51	1927.32	1598.38	2432.49	1630.75	1827.86	2599.97
41	2368	1998.37	2670.81	2431.97	2067.28	2465.63	2086	2639.01	2454.15	2771.05	1900.31	2786.36	2284.89	1948.66	1604.86	2427.7	1635.48	1822.34	2610.1
42	2357.35	1993.62	2660.35	2419.22	2075.09	2460.5	2077.84	2637.35	2449.39	2780.14	1909.86	2779.55	2311.15	1945.19	1610.02	2417.5	1643.73	1816.32	2610.42
43	2347.26	1987.87	2662.89	2424.28	2067.9	2475.7	2086.03	2629.66	2455.13	2783.62	1914.03	2776.48	2304.2	1935.18	1602.47	2439.19	1649.91	1835.75	2618.27
44	2356.79	1988.19	2666.54	2429.39	2077.8	2465.69	2073.04	2629.73	2463.81	2770.29	1910.74	2790.2	2307.05	1926.4	1610.61	2416.76	1645.48	1828.94	2615.56
45	2359.07	1989.36	2666.32	2412.1	2071.54	2457.62	2090.59	2629.01	2458.6	2773.84	1907.26	2789.97	2313.44	1934.28	1612.78	2411.75	1644.65	1817.4	2602.49
46	2351.51	1999.62	2667.25	2425.86	2070.77	2460.39	2082.65	2639.76	2458.02	2768.59	1914.13	2791.86	2315.12	1937.21	1614.95	2422.81	1650.39	1805.99	2606.38
47	2346.04	1993.51	2668.83	2407.99	2073.67	2466.49	2090.8	2630.04	2454.82	2765.2	1912.76	2775.23	2314.16	1938.31	1629.08	2418.63	1644.46	1824.52	2599.44
48	2367.44	2002.91	2662.7	2423.22	2077.49	2464.34	2076.49	2632.02	2447.05	2764.1	1927.2	2777.19	2301.07	1929.95	1635	2430.6	1648.44	1823.4	2605.47
49	2359.07	1988.42	2668.2	2424.99	2070.99	2465.2	2078.83	2629.92	2452.84	2781.63	1906.41	2778.51	2333.49	1927.96	1621.5	2422.06	1639.86	1817.61	2598.85
50	2364.36	1992.14	2656.21	2423.4	2062.25	2461.76	2084.88	2625.55	2459.22	2767.93	1913.66	2785.42	2311.69	1939.4	1611.01	2429.21	1643.66	1829.62	2606.96
51	2357.99	2013.17	2666.22	2435	2083.95	2459.85	2077.39	2630.74	2464.56	2771.84	1924.49	2785.94	2317.96	1927.92	1620.64	2435.86	1628.93	1829.92	2604.53
52	2358.28	1993.26	2666.58	2433.95	2065.22	2463.99	2085.76	2631.64	2475.53	2782.24	1922.09	2784.33	2315.38	1930.52	1608.66	2415.52	1613.01	1831.63	2600.91
53	2371.44	1998.49	2666.02	2429.88	2080.31	2492.81	2116.15		2492.11	2798.18	1937.51	2804.23	2309.17	1951.78	1601.12	2436.01	1597.19	1831.41	2609.08
54
55
56						2424.72	2058.56	2583.7	2397.3	2727.03	1853.06	2717.57		1871.26			1580.16	1797.98	2503.93
57	2341.48	1963.4	2641.65		2054.87	2421.74	2059.18	2613.68	2435.45	2745.82	1889.88	2750.09	2277.63	1930.75	1581.56	2381.9	1614.97	1799.9	2561.77
58	2330.29	1968.5	2630.11	2405.1	2050.5	2433.05	2072.76	2622.86	2430.5	2753.27	1896.99	2764.06	2303.51	1906.44	1583.84	2405.2	1582.69	1803.38	2574.44
59	2318.27	1977.16		2405.6	2068.92	2443.7	2058.55	2605.72	2435.47	2740.94	1893.24	2756.11	2314.98	1900.92	1588.21	2406.43	1610.01	1790.88	2527.19
60	2328.16	1944.06	2651.58	2399.14	2074	2443.64	2066.82	2621.3	2438.37	2756.65	1898.29	2770.47	2296.61	1923.76	1591.18	2404.92	1622.58	1799.87	2561.79
61	2328.53	1954.8	2639.65	2413.75	2059.92	2470.45	2061.09	2619.18	2437.49	2754.68	1898.59	2749.63	2301.24	1904.36	1584.49	2402.09	1630.5	1858.39	2574.3
62	2340.44	1970.77	2652.96	2405.97	2068.33	2448.82	2069.8	2605.17	2430.41	2750.88	1894.62	2758.52	2306.2	1898.64	1599.13		1623.24	1793.77	2576.65
63	2326.74	1952.04	2657.65	2384.36	2067.21	2460.95	2063.41	2617.09	2438	2758.63	1907.96	2763.8	2293.52	1910.93	1606.25	2423.44	1575.75	1809.09	2587.14
64	2336.44	1966.5	2662.25	2396.03	2080.7	2452.83		2622.64	2451.69	2768.86	1899.3	2760.61	2304.8	1905.2	1597.42	2386.73	1603.01	1810.25	2584.25
65	2330.79	1967.23	2655.24	2404.15	2088.24		2073.75	2633.37	2491.51	2756.26	1904.45	2769.66	2303.91	1915.85	1601.63	2406.27	1598.27	1811.07	2577.33
66	2338.25	1976.87	2649.27	2410.76	2049.41	2463.5	2085.6	2641.72	2444.37	2769.11	1909.95	2790.84	2330.79	1917.44	1585.11	2404.12	1598.99	1816.23	2678.86
67	2331.03	1977.34	2655.97	2411.1	2059.77	2469	2121.49	2637.51	2417.13	2758.4	1912.77	2772.19	2297.35	1900.71	1587.78	2405.59		1803.56	2597.81
68	2328.09	1973.49	2636.4	2401.79	2053.99	2449.61	2070.79	2626.68	2425.73	2759.98	1911.72	2807.77	2291.99	1921.3	1621.66	2412.14	1606.03	1800.93	2584.48
69	2329.02	1973.97	2649.45	2410.28	2037.66		2080.68	2624.77	2444.97	2770.47	1914.12	2782.66	2323.49	1862.02		2411.08	1619.82	1807.6	2613.39
70	2336.66	1981.75	2650.92	2400.8		2436.48		2641.69	2453.62	2761.05	1916.77	2771.05	2298.75	1937.19	1601.82	2410.02	1610.02	1807.31	2574.61
71	2348.85	1978.28	2650.1	2408.65	2051.37	2440.37	2074.78	2623	2455.72	2773.1	1927.9	2769.21	2308.58	1912.89	1592.71	2408.6	1612.79	1804.81	2625.13
72	2349.21		2654.01	2396		2463	2076.57	2626.67	2435.13	2764.9	1919.65	2718.62	2317.44	1922.85	1587.97	2408.42	1626.45	1803.9	2606.89
73	2338.78		2665.87			2478.3	2071.92	2623.23	2442.96	2764.56	1898.72	2781.98	2315.82	1885.36	1597.57	2412.88	1619.24	1810.41	2731.04
74		1986.59	2662.1	2408.66	2054.04	2466.45	2088.77	2620.73	2441.34	2754.52	1900.03	2790.56	2319.23	1925.87	1583.59		1596.11	1809.02	2610.47
75	2343.57	1985.82	2672.84	2394.52	2072.92	2518.08	2134.08	2641.54	2462.48	2774.25	1925.6	2797.68	2336.13	1919.23	1583.32		1590.29		2616.28
76	2393.42	1963.55	2672.39	2389.47	2088.27	2483.28		2635.1	2449.36	2775.15	1927.55	2797.86		1935.47	1601.72	2418.47	1589.88	1829.01	2626.14
77	2352.15	1964.57	2669.55	2408.19	2105.09	2499.12	2099.1	2648.79	2472.09	2790.21	1935.65	2806.58	2342.24	1932.61	1614.38	2420.78	1586.35	1840.12	2630.86
78	2373.68	1978.1	2718.5	2409.07	2121.12	2521.99	2100.03	2651.63	2461.16	2782.42	1950.44	2832.07	2321.52	1879.21	1592.5	2407.86	1565.82	1935.65	2628.2
79	2368.39	1982.79	2717.71	2428.24	2136.32	2556.7	2137.07	2674.7	2486.18	2805.35	1946.37	2815.34	2355.66		1609.45	2399.96	1578.67	1838.8	2647.24
80	2401.5	1990.01	2734.18	2441.02	2149.79	2562.31	2156.61	2714.19	2514.85	2825.01	1965.67	2830.76	2383.24	1950.77	1611.82	2414.18	1581.72	1841.26	2662.42
81	2397.71	2017.8	2748.4	2493.4	2160.73	2614.39	2194.64	2731.05	2540.62	2857.05	1992.45	2840.88	2409.51	1960	1638.09	2426.19	1598.08	1838.75	2694.22
82	2412.43	2006.18	2763.95	2518.33	2175.12	2650.65	2233.27	2768.76	2578.26	2894.33	2006.73	2865.07	2448.03	1981.79	1648.83	2433.68	1619.32	1852.37	2731.7
83	2451.99	2030.76	2771.36	2557.86	2189.7	2675.96	2269.07	2794.81	2610.66	2931.12	2013.22	2898.14	2490.41	2010.1	1677.01	2472.16	1639.38	1867.75	2756.73
84	2467.41	2053.03	2786.58	2601.94	2197.31	2718.92	2324.32	2830.31	2645.92	2966.81	2037.47	2935.96	2522.26	2036.95	1674.66	2492.46	1674.74	1898.3	2804.93
85	2488.97	2071.96	2801.39	2635.16	2232.75	2756.57	2356.83	2873.25	2678.11	3016.21	2054.21	2967.56	2565.75	2072.47	1716.1	2548.99	1698.91	1914.06	2838.59
86	2505.52	2077.03	2824.89	2672.94	2230.94	2794.33	2403.82	2907.8	2736.92	3057.13	2066.62	3017.43	2584.6	2111.71	1735.68	2590.97	1729.83	1936.47	2886.1
87	2539.57	2102.11	2827.14	2720.14	2261.63	2846.95	2431.94	2939.18	2752.61	3126.03	2089.9	3053.16	2651.7	2142.1	1746.4	2617.12	1773.7	1939.11	2933.42
88	2542.38	2124.65	2849.99	2743.28	2295.13	2879.66	2472.21	2982.23	2790.03	3149.3	2095.35	3093.86	2689.23	2174.98	1765.23	2669.39	1785.3	1981.23	2957.36
89	2574.35	2137.04	2870.6	2765.95	2306.92	2903.74	2500.06	2994.79	2825.56	3185.51	2115	3118.18	2723.72	2189.29	1801.32	2717.54	1803.21	2008.06	3008.59
90	2596.09	2158.56	2895.62	2804.25	2331.34	2945.85	2526.13	3032.5	2851.69	3231.77	2142.3	3164.07	2769.67	2241.66	1821.69	2758.28	1826.84	2008.94	3036.48
91	2603.78	2178.28	2922.44	2835.9	2344.07	2960.96	2554.6	3075.96	2864.73	3264.72	2157.71	3216.7	2806.47	2263.53	1839.91	2804.82	1860.33	2032.76	3057.06
92	2621.69	2186.07	2935.63	2861.22	2360.67	2996.21	2588.32	3084.92	2912.35	3299.74	2182.68	3234.54	2829.16	2295.57	1854.61	2831.05	1872.3	2061.49	3107.68
93	2642.91	2202.61	2945.7	2870.78	2387.27	3033.64	2605.08	3122.91	2942.93	3339.65	2214.84	3278.86	2862.49	2318.46	1889.21	2865.29	1876.45	2080.02	3118.23
94	2675.03	2206.17	2966.53	2896.26	2398.9	3056.92	2610.94	3156.79	2973.02	3361.7	2227.42	3316.65	2904.39	2331.44	1905.53	2892.62	1913.03	2095.67	3144.9
95	2684.23	2217.8	2982.57	2917.83	2434.06	3092.38	2645.74	3168.76	2982.91	3379.82	2237.02	3330.52	2928.31	2359.74	1901.27	2932.47	1920.42	2117.09	3169.88
96	2708.79	2231.95	3004.06	2946.06	2443.41	3095.65	2659.99	3197.25	2999.8	3435	2260.88	3373.82	2960.24	2366.26	1927.89	2960.83	1934.58	2129.42	3203.19
97	2717.51	2246.86	3021.51	2952.93	2471.58	3130.53	2683.09	3213.72	3035.78	3458.8	2271.47	3395.88	2979.54	2408.47	1946.79	2981.05	1954.74	2157.37	3227.29
98	2657.02	2278.59	3058.24	2969.68	2478.78	3133.8	2719.39	3246.3	3046.36	3481.38	2295.25	3415.37	3019.83	2414.02	1961.83	2993.65	1966.91	2150.1	3231.41
99	2756.88	2266.66	3057.03	2991.82	2503.36	3162.38	2716.32	3265.47	3070.58	3503.73	2292.41	3440.27	3032.07	2434.48	1961.88	3021.6	1976.13	2177.18	3245.43
100	2754.77	2284.37	3077.33	3003.74	2490.29	3185.48	2743.5	3290.98	3102.87	3525.66	2321.54	3459.53	3054.08	2445.13	1990.87	3043.97	1999.29	2189.33	3286.32
101	2798.24	2301.91	3079.45	3019.09	2528.32	3202.58	2749.45	3285.76	3115.84	3548.24	2319.66	3493.09	3076.39	2480.24	2010.73	3051.33	2010.69	2196.77	3294.34
102	2787.07	2312.78	3100.03	3031.82	2537.11	3216.56	2766.16	3313.96	3131.37	3560.17	2340.23	3520.56	3103.86	2491.42	2003.81	3077.15	2021.43	2226.57	3327.77
103	2812.34	2327.07	3112.81	3057.88	2551.76	3231.74	2786.49	3337.72	3152.51	3577.64	2338.22	3538.91	3127.85	2514.49	2018.71	3063.9	2020.44	2232.8	3341.49
104	2818.45	2325.89	3134.63	3066.14	2561.62	3248.76	2782.91	3352.6	3158.37	3593.03	2358.48	3553.84	3129.6	2523.82	2031.18	3108.47	2031.91	2240.59	3348.72
105	2836.05	2330.08	3143.05	3077.83	2562.89	3277.88	2807.4	3367.35	3171.43	3610.82	2385.62	3573.81	3158.81	2536.14	2035.36	3135.11	2048.42	2250.7	3358.55
106	2842.76	2352.93	3163.43	3098.68	2580.33	3272.66	2809.71	3377.24	3192.38	3640.61	2399.84	3586.8	3168.74	2552.54	2056.38	3131.37	2050.04	2264.31	3393.75
107	2868.18	2355.71	3159.52	3117.41	2589.79	3293.2	2824.15	3389.57	3201.95	3647.28	2402.47	3603.71	3194	2572.98	2069.72	3154.18	2078.44	2282.25	3398
108	2874.36	2377.32	3184.25	3118.07	2604.53	3288.8	2828.72	3406.81	3208.42	3643.6	2418.99	3622.8	3207.97	2554.8	2082.54	3181.14	2081.39	2291.19	3411.14
109	2883.19	2391.32	3180.58	3112.48	2623.33	3312.61	2844.76	3415.37	3218.66	3664.16	2430.33	3646.05	3227.94	2593.28	2097.76	3187.12	2082.7	2296.22	3431.98
110	2897.54	2385.56	3138.94	3146.27	2630.95	3325.19	2844.13	3438.81	3228.62	3679.88	2434.79	3654.32	3223.96	2589.58	2115.07	3203.28	2102.4	2299.76	3444.08
111	2922.56	2405.85	3236.98	3143.12	2658.61	3345.81	2853.52	3460.09	3256.43	3702.04	2459.37	3681.4	3248.56	2600.88	2138.65	3228.79	2113.17	2318.7	3468.59
112	2944.98	2426.11	3241.37	3151.5	2659.97	3374.14	2876.73	3465.86	3272.47	3716.91	2480.36	3689.51	3261.68	2625.99	2133.92	3243.12	2141.88	2332.59	3471.03
113	2947	2420.15	3266.18	3160.96	2676.92	3368.08	2873.58	3478.04	3270.66	3709.8	2472.44	3704.18	3269.83	2624.67	2142.3	3241.3	2146.17	2354.62	3482.2
114	2966.26	2430.09	3279.17	3172.89	2681.21	3377.77	2883.55	3498.93	3307.52	3718.39	2492.68	3719.88	3290.15	2635.41	2161.02	3257.13	2158.02	2339.21	3501.41
115	2974.71	2440.2	3296.4	3157.27	2690.35	3376.32	2881.16	3494.52	3302.12	3728.46	2496.86	3725.43	3301.38	2638.35	2176.46	3266.5	2144.51	2359.14	3508.13
116	2990.38	2439.47	3281.41	3181.96	2681.5	3385.86	2892.84	3510.97	3302.89	3742.67	2495.32	3750.66	3305.71	2648.08	2170.61	3259.19	2159.83	2352.53	3532.78
117	2999.09	2461.83	3301.43	3184.49	2693.5	3386	2881.39	3521.11	3312.84	3741.5	2520.78	3763.83	3307.46	2645.05	2178.38	3264.33	2162.48	2377.34	3531.33
118	3005.74	2453.28	3307.31	3192.16	2710.79	3390.32	2894.28	3521.01	3329.1	3754.52	2526.55	3760.2	3323	2672.58	2163.33	3292.37	2190.16	2369.28	3537.87
119	3005.94	2471.53	3333.52	3189.33	2712.22	3403.9	2893.29	3546.73	3337.58	3770.44	2530.47	3774.12	3317.62	2670.26	2178.3	3289.46	2187.45	2380.93	3540.86
120	3020.39	2480.23	3335.51	3212.21	2722.85	3415.39	2899.6	3534.49	3341.5	3763.82	2530.07	3772.28	3317.98	2678.37	2183.35	3281.87	2202.2	2387.13	3552.07
121	3025.66	2492.93	3353.34	3200.76	2729.74	3406.74	2916.12	3562.25	3343.75	3772.79	2533.32	3785.7	3342.2	2677.07	2195.56	3287.39	2194.4	2394.39	3553.11
122	3028.84	2494	3356.78	3195.8	2731.96	3415.82	2907.51	3546.06	3346.75	3788.09	2544.55	3790.38	3343.12	2671.45	2193.49	3301.89	2208.95	2403.83	3564.88
123	3042.49	2487.58	3362.36	3212.12	2740.42	3402.42	2915.82	3558.62	3352.04	3786	2552.18	3799.92	3332.71	2689.32	2197.69	3311.41	2218.05	2402.06	3564.71
124	3055.63	2497.53	3366.83	3210.17	2735.21	3422.7	2910.35	3569.57	3355.41	3787.94	2545.08	3811.73	3345.94	2687.5	2216.03	3305.37	2192.09	2416.18	3584.47
125	3059.47	2509.19	3378.33	3219.63	2729.23	3432.09	2917.48	3568.64	3354.15	3788.07	2552.95	3810.1	3341.09	2685.69	2226.77	3350.52	2217.18	2406.09	3587.48
126	3058.41	2507.64	3380.59	3215.79	2747.27	3445.91	2915.71	3578.62	3360.04	3793.26	2566.32	3822.83	3345.59	2704.52	2232.36	3355.18	2213.93	2432	3591.04
127	3068.36	2516.99	3400.6	3215.32	2750.99	3441.07	2914.41	3579.62	3356.13	3789.36	2566.84	3824.93	3353.4	2692.38	2225.19	3317.55	2222.36	2431.81	3602.13
128	3081.77	2519.91	3383.02	3207.21	2760.45	3442.59	2905.71	3590.58	3356.94	3802.59	2581.59	3833.25	3350.21	2706.08	2226.99	3325.09	2229.48	2430.54	3605.99
129	3075.56	2522.63	3401.04	3219.52	2766.55	3447.16	2895.46	3577.23	3366.54	3812.05	2583.47	3833.05	3359.75	2701.96	2218.61	3327.28	2219.36	2419.75	3601.99
130	3091.19	2524.84	3404.61	3206.86	2748.56	3434.62	2905.69	3593.45	3362.5	3805.67	2600.58	3831.96	3361.9	2708.1	2227.48	3335.52	2240.08	2450.23	3615
131	3089.58	2530.01	3421.03	3211.77	2759.12	3442.23	2915.33	3590.29	3368.47	3804.97	2591.07	3827.67	3357.31	2702.8	2229.82	3325.06	2242.41	2453.59	3620.51
132	3078.17	2546.59	3429.27	3217.04	2760.83	3444.2	2903.75	3595.99	3365	3796.63	2581.98	3835.64	3362.55	2703.68	2231.02	3332.32	2241.51	2442.64	3623.88
133	3097.44	2539.31	3430.69	3229.74	2759.01	3440.82	2900.79	3606.69	3369.54	3803.7	2603.58	3831.19	3369.05	2707.46	2217.39	3314.82	2236.55	2441.69	3627.58
134	3106.12	2546.08	3437.79	3214.29	2783.38	3452.34	2915.97	3591.42	3375.06	3819.1	2593.72	3838.53	3365.16	2716.67	2209.67	3334.81	2239.39	2450.38	3626.23
135	3109.61	2551.85	3450.59	3218.16	2779.22	3454.02	2904.59	3602.2	3381.19	3802.34	2609.19	3844.73	3362.89	2714.68	2236.88	3332.96	2250.97	2447.32	3626.29
136	3119.6	2556.91	3454.07	3216.7	2774.14	3456.57	2899.69	3610.12	3367.34	3808.48	2612.9	3841.48	3361.71	2716.04	2231.67	3337.08	2260.4	2456.77	3628.96
137	3129.19	2569.49	3451.81	3212.26	2784.02	3458.92	2912.4	3609.74	3373.57	3805.77	2614.8	3832.64	3376.25	2718.16	2241.34	3332.42	2251.04	2463.21	3637.87
138	3126.09	2572.79	3449.92	3228.05	2780.33	3456.12	2907.75	3612.06	3361.18	3818.03	2615.34	3860.83	3354.44	2717.37	2234.57	3335.25	2265.79	2456.34	3626.65
139	3122.82	2568.15	3462.07	3212.55	2790.81	3457.12	2910.89	3609.92	3366.28	3824.28	2624.98	3857.04	3367.08	2727.85	2224.44	3340.27	2258.71	2471.08	3637.05
140	3139.47	2563.43	3462.75	3209.7	2782.96	3460.19	2895.74	3618.1	3363.62	3811.47	2619.22	3853.35	3372.79	2712.47	2242.84	3333.78	2262.82	2482.7	3652.5
141	3133.97	2560.67	3481.5	3218.49	2788.94	3458.8	2896.65	3616.18	3372.06	3821.04	2630.05	3849.61	3371.17	2738.16	2240.29	3347.69	2274.29	2484.27	3655.4
142	3133.42	2578.19	3478.08	3220.48	2786.66	3445.75	2903.24	3628.23	3364.52	3809.6	2629.12	3860.02	3371.67	2728.24	2229.86	3333.65	2263.92	2475.14	3651.29
143	3129.04	2595.14	3482.14	3211.12	2787.99		2897.18	3618	3365.62	3813.68	2631.87	3843.22	3374.47	2737.79	2246.53	3337.99	2258.51	2488.29	3658.51
144	3144.91	2577.04	3482.36	3206.57	2788.33	3452.03		3632.33	3365.6	3816.54	2630	3852.42	3365.09	2726.7	2240.13	3314.78	2274.38	2481.4	3654.92
145	3149.69	2594.43	3492.74		2789.48	3451.1		3623.37	3380.16	3833.64	2635.13	3857.93	3381.22	2740.31	2243.82	3342.27	2268.38	2492.5	3664.01
146	3142.98	2587.93	3483.89		2799.38	3437.03	2894.62	3624.54	3374.56	3838.02	2631.32	3857.68	3382.25	2728.33	2248.96	3339.58	2273.91	2493.76	3660.9
147	3151.11	2590	3502.74	3215.63	2810.38	3455.43	2897.92	3638.78	3370.03	3832.38	2646.72	3859.65	3373.39	2734.27	2243.49	3324.51		2500.46	3664.93
148	3175.01	2595.2	3506.45	3215.7	2802.74	3447.95		3635.13	3371.82	3801.35	2639.24	3837.04	3383.74	2733.89	2238.36	3339.53	2291.81	2480.03	3677.33
149	3169.03	2592.41	3506.26	3211.33	2808.72	3446.22	2898.24	3623.65	3358.26	3818.27	2644.45	3863.96	3387.9	2729.78	2229.02	3332.39	2302	2485.27	3679.14
150	3179.06	2608.82	3509.38	3223.43	2814.85	3453.79	2893.03	3633.74	3367.92	3818.23	2643.2	3866.07	3387.16	2759.06	2247.75	3340.31	2294	2490.36	3675.92
151	3170.34	2602.11	3516.41	3214.46	2814.97	3460.14	2888.84	3645.6	3358.4	3818.83	2642.23	3850.44	3375.36	2750.89	2245.55	3331.61	2290.88	2500.56	3679.31
152	3174.33	2609.39	3525.11	3214.81	2805.39	3449.83	2891.62	3650.29	3366.04	3821.57	2650.78	3866.9	3377.28	2764.77	2233.2	3329.89	2286.32	2506.44	3677.62
153	3171.88	2613.38	3522.37	3223.62	2808.52	3454.4	2885.64	3650.8	3345.69	3828.65	2648.44	3862.26	3377.87	2732.45	2240.46	3347.78	2288.64		3675.17
154	3189.36	2611.98	3535.84	3203.32	2821.11	3442.68	2881.38	3644.21	3353.29	3814.49	2655.39	3850.99	3392.59	2748.13	2240.06	3313.58	2283.43	2486.09	3688.31
155	3204.58	2611.76	3524.24	3212.61	2812.01	3462.32	2884.95	3654.22	3352.29	3815.54	2654.6	3860.04	3375.95	2747.23	2245.55	3327.93	2294.73	2515.31	3678.84
156	3185.93	2612.29	3545.01	3218.05	2813.22	3456.9	2880.46	3652.18	3355.87	3832.89	2664.7	3864.88	3379.82	2743.03	2247.2	3342.61	2294.91	2512.33	3694.95
157	3189.79	2630.08	3543.56	3218.8	2814.8	3441.66	2888.15	3645.1	3351.86	3823.17	2671.27	3861.07	3392.4	2728.53	2256.79	3338.54	2296.47	2524.84	3686.1
158	3203.6	2625.41	3548.96	3213.79	2812.44	3458.97	2878.37	3649.36	3341.34	3824.85	2655.89	3855.93	3395.86	2739.47	2265.6	3334.66	2286.34	2517.11	3685.34
159	3217.19	2621.47	3543.07	3207.38	2817.88	3454.6	2877.29	3647.22	3341.67	3824.24	2665.54	3854.49	3387.76	2749.35	2243.69	3333.8	2293.21	2525.43	3705.76
160	3201.42	2636.25	3559	3202.12	2817.87	3448.55	2869.44	3650.2	3342.28	3820.52	2661.74	3844.11	3390.91	2743.5	2246.72	3332.59	2291.17	2532.41	3687.39
161	3207.05	2626.25	3561.07	3209.59	2818.11	3449.29	2877.69	3661.98	3344.21	3828.59	2672.68	3848.79	3385.3	2734.91	2243.16	3329.04	2287.87	2525.79	3706.19
162	3218.8	2624.36	3547.81	3200.4	2814.63	3452.71	2866.31	3655.72	3327.87	3830.88	2664.11	3852.98	3374.01	2756.64	2245.17	3324.11	2294.23	2532.2	3712.29
163	3218.87	2637.52	3557.24	3208.57	2812.48	3443.99	2869.33	3653.43	3324.61	3817.01	2669.29	3852.54	3379.67	2750.55	2249.38	3328.87	2299.12	2540.18	3699.06
164	3218.89	2614.34	3578.11	3219.21	2820.04	3448.89	2860.71	3650.45	3332.72	3820.42	2648.47	3846.61	3383.18	2749.31	2242.48	3342.6	2288.82	2535.52	3694.46
165	3223.77	2629.58	3587.55	3200.67	2813.85	3455.82	2860.4	3660.57	3323.12	3830.51	2668.68	3852.08	3379.22	2749.02	2250.17	3320.59	2295.96	2532.47	3705.14
166	3235.86	2643	3577.03	3209.39	2818.02	3443.41	2858.32	3659.43	3325.56	3816.79	2667.91	3838.75	3373.13	2751.7	2255.44	3325.84	2302.79	2536.24	3699.5
167	3226.83	2643.24	3593.52	3206.07	2834.65	3434.38	2855.04	3651.04	3326.8	3819.05	2670.12	3839.75	3371.68	2735.65	2241.31	3321.83	2308.57	2542.17	3703.3
168	3238.86	2654.38	3596.18	3212.49	2823.95	3456.86	2844.15	3654.24	3308.71	3811.53	2674.8	3837.29	3381.34	2741.3	2258.23	3311.86	2305.98	2550.97	3720.24
169	3229.14	2649.33	3590.39	3213.82	2822.93	3442.79	2849.05	3645.86	3307.16	3829.57	2670.43	3818.71	3367.94	2757.37	2253.8	3336.75	2302.73	2546.28	3702.6
170	3250.71	2655.12	3597.04	3215.61	2826.16	3448.17	2838.22	3654.23	3316.73	3808.51	2683.22	3826.4	3375.57	2743.59	2268.55	3322.53	2303.68	2554.09	3711.55
171	3250.3	2650.78	3596.66	3205.55	2835.62	3437.53	2849.23	3650.77	3306.6	3809.82	2676.65	3821.23	3370.36	2741.07	2255.55	3317.96	2310.57	2549.51	3729.47
172	3264.39	2652.57	3598.99	3211.22	2831.44	3434.11	2830.23	3653.13	3301.72	3813.13	2681.38	3838.79	3365.18	2744.71	2244.64	3315.66	2305.19	2550.42	3722.6
173	3263.07	2650.42	3608.94	3205.41	2825.75	3429.91	2834.61	3666.3	3315.06	3819.14	2657.42	3834.03	3363.9	2754.51	2255.09	3312.01	2305.7	2558.03	3734.9
174	3248.04	2654.81	3609.13	3219.14	2830.77	3443.67	2822.68	3662.37	3293.42	3809.75	2669.73	3823.11	3351.14	2736.56	2240.89	3325.93	2299.01	2553.46	3726.77
175	3266.89	2666.82	3615.49	3214.23	2836.53	3424.6	2831.75	3662.53	3285.95	3812.74	2679.89	3822.1	3365.55	2746.22	2250.76	3314.37	2309.22	2562.32	3729.89
176	3272.17	2673.86	3628.46	3221.31	2835.89	3437.02	2834.84	3667.66	3279.16	3809.21	2679.01	3824.6	3348.33	2745.89	2251.72	3319.6	2308.92	2569.34	3742.65
177	3282.7	2661.89	3618.59	3228.24	2841.13	3424.11	2819.98	3660.82	3282.85	3798.46	2668.33	3814.68	3359.19	2750.13	2237.64	3299.23	2307.21	2569.47	3732.54
178	3278.68	2666.68	3631.98	3210.46	2836.06	3426.07	2823.15	3653.12	3283	3807.43	2684.76	3823.68	3359.94	2738.75	2245.98	3329.43	2314.73	2565.65	3738.33
179	3279.42	2675.89	3636.03	3207.57	2838.34	3434.72	2824.5	3670.7	3287.58	3818.24	2667.84	3820.78	3353.05	2745.04	2256.1	3303.59	2313.08	2578.3	3749
180	3291.3	2669.65	3639.3	3212.29	2847.22	3431.89	2813.96	3680.54	3291.89	3817.87	2672.05	3814.02	3349.46	2739.21	2229.98	3309.51	2312.96	2573.57	3760.73
181	3286.87	2683.23	3631.46	3215.03	2851.65	3422.14	2807.83	3676.27	3273.88	3803.86	2685	3790.92	3356.53	2740.28	2248.14	3312.25	2317.16	2573.05	3759.4
182	3298.45	2666.21	3648.08	3207.77	2852.68	3422.55	2814.84	3663.25	3275.24	3803.71	2681.85	3795.31	3336.14	2735.48	2247.36	3312.39	2317.05	2586.38	3750.1
183	3297.36	2682.36	3645.74	3208.41	2855.03	3422.39	2815.97	3668.25	3276.19	3812.42	2679.8	3795.74	3348.92	2743.59	2241.59	3316.69	2330.2	2592.61	3755.87
184	3305.98	2680.53	3664.01	3222.16	2859.78	3426.85	2816.06	3663.49	3282.19	3812.92	2669.88	3792.98	3343.4	2756.56	2238.56	3320.84	2331.64	2589.87	3763.11
185	3308.86	2683.19	3656.88	3214.32	2859.95	3426.98	2799.99	3668.72	3262.26	3826.32	2680.98	3796.23	3347.12	2739.89	2251.93	3320.82	2327.86	2591.23	3770.3
186	3311.47	2676.51	3659.93	3206.04	2853	3435.47	2814.8	3667.29	3262.54	3815.37	2681.75	3804.2	3341.51	2733.9	2255.15	3319.79	2324.41	2601.27	3771.51
187	3315.53	2689.27	3670.61	3222.85	2860.41	3424.85	2803.97	3675.84	3267.67	3806.5	2676.28	3791.23	3347.97	2740.69	2248.2	3325.97	2332.87	2597.59	3775.64
188	3312.74	2680.77	3679.82	3221.79	2866.1	3438.74	2803.52	3666	3276.04	3815.33	2683.9	3791.06	3341.93	2740.42	2247.47	3325	2321.35	2593.12	3787.11
189	3318.71	2682.92	3684.49	3209.99	2867.35	3450.19	2809.45	3678.17	3253.31	3815.75	2668.53	3780.03	3328.13	2747.92	2246.27	3325.75	2326.85	2607.4	3787.16
190	3327.68	2696.44	3684.72	3208.55	2857.99	3439.07	2802.56	3677.68	3253.94	3822.88	2690.62	3785.78	3339.2	2734.3	2243.13	3319.34	2327.23	2604.16	3784.72
191	3330.17	2703.82	3680.27	3226.95	2861.35	3432.48	2799.32	3677.71	3265.39	3830.49	2681.11	3786.83	3343.94	2736.09	2247.79	3329.13	2344.39	2605.78	3774.59
192	3320.64	2690.51	3678.72	3224.03	2868.77	3430.39	2800.59	3685.69	3257.96	3815.58	2682.45	3793.54	3333.53	2742.12	2240.14	3331.54	2337.01	2621.18	3788
193	3329.51	2692.02	3685.46	3217.74	2868.59	3435.77	2790.49	3692.56	3249.13	3838.06	2686.92	3784.78	3339.21	2733.88	2245.8	3329.87	2334.08	2606.77	3787.18
194	3323.25	2692.56	3699.34	3213.3	2859.18	3434.62	2806.35	3685.89	3249.68	3818.69	2685.38	3774.27	3326.74	2745.07	2256	3330.64	2342.91	2617.74	3799.94
195	3325.94	2701.79	3693.08	3208.25	2865.3	3433.6	2785.03	3683.57	3253.9	3827.57	2692.68	3772.66	3342.66	2748.39	2254.07	3324.14	2341.72	2603.16	3793.11
196	3336.55	2686.67	3703.17	3221.03	2877.55	3429.77	2804.19	3688.28	3250.97	3826.98	2680.41	3767.14	3349.17	2762.05	2248.12	3340	2343.88	2609.21	3795.55
197	3343.34	2687.67	3699.19	3226.39	2866.04	3435.44	2802.39	3688.74	3247.17	3828.74	2681.02	3759.18	3328.41	2735.72	2254.15	3335.13	2340.39	2619.45	3801.12
198	3343.89	2708.43	3706.74	3223.21	2864.38	3439.53	2790.86	3704.6	3258.69	3822.2	2693.25	3776.3	3330	2739.48	2254.75	3334.1	2345.72	2626.81	3806.67
199	3335.27	2710.02	3699.95	3219.07	2868.89	3433.87	2782.41	3691.46	3240.6	3839.2	2680.44	3768.71	3335.32	2749.91	2260.4	3330.99	2342.14	2621.57	3807.96
200	3350.44	2709.69	3714.59	3208.61	2876.41	3438.45	2806.7	3697.63	3245.42	3834.74	2693.11	3764.35	3335.34	2744.42	2254.14	3325.51	2345.72	2623.58	3808.86
201	3340.11	2706.31	3720.89	3204.18	2883.43	3429.82	2785.92	3695.26	3257.17	3827.73	2689.73	3775.49	3348.73	2741.2	2254.54	3333.01	2339.35	2633.04	3813.15
202	3348.34	2705.87	3719.39	3204.68	2878.03	3449.84	2793.86	3691.86	3240.93	3827.68	2698.6	3759.28	3332.66	2737.35	2267.8	3337.45	2345.47	2641.07	3822.11
203	3346.74	2714.86	3720.38	3229.87	2880.67	3443.37	2779.36	3703.8	3235.62	3837.52	2682.46	3766.21	3345.4	2746.5	2260.04	3331.6	2346.28	2628.02	3819.05
204	3354.36	2700.96	3720.24	3212.66	2880.19	3434.88	2793.11	3704.48	3235.84	3835.57	2702.22	3756.77	3326.9	2746.66	2269.03	3335.92	2336.39	2639.55	3811.11
205	3351.92	2717.91	3737.4	3200.43	2882.11	3439.15	2778.95	3711.84	3232.11	3835.66	2692.03	3754.58	3328.62	2733.43	2278.42	3339.52	2352.65	2635.69	3819.99
206	3344.26	2711.23	3728.89	3210.22	2872.98	3449.34	2777.55	3704.01	3238.23	3840.18	2697.36	3752.1	3324.49	2742.18	2272.81	3350.92	2365.13	2623.92	3833.91
207	3359.46	2712.32	3735.31	3217.97	2890.11	3437.39	2775.83	3705.96	3231.6	3834.17	2689.37	3750.35	3324.5	2761.17	2273.12	3330.91	2354.76	2642.33	3831.87
208	3359.14	2718.43	3737.43	3213.51	2873.71	3447.97	2784.7	3699.97	3238.59	3838.51	2693.39	3757.66	3331.8	2749.17	2266.89	3342.49	2363.83	2651.93	3824.89
209	3344.69	2717.04	3733.94	3214.31	2888.71	3445	2779.49	3695.74	3234.28	3849.19	2694.56	3745	3345.96	2756.03	2269.13	3337.9	2355.81	2643.34	3837.49
210	3360.88	2716.82	3744.9	3203.83	2891.56	3440.4	2782.15	3712.87	3215.21	3845.97	2700.33	3759.13	3342.62	2749.04	2278.18	3337.16	2362.71	2644.35	3827.25
211	3374.58	2710.24	3747.68	3197.04	2897.98	3450.65	2797.18	3713.29	3229.3	3850.59	2706.33	3750.46	3332.77	2756.52	2272.51	3342.86	2357.29	2634.34	3831.82
212	3362.79	2726.58	3738.93	3208.51	2893.3	3430.77	2775.47	3721.98	3222.56	3853.75	2700.1	3748.21	3347.62	2743.94	2278.9	3346.73	2366.81	2653.2	3837.92
213	3362.88	2714.36	3743.11	3194.6	2888.08	3448.92	2775.45	3723.28	3216.62	3854.89	2688.42	3742.53	3350.01	2758.86	2285.53	3338.75	2367.98	2658.99	3834.98
214	3370.28	2708.64	3751.57	3200.99	2893.43	3459.75	2788.18	3701.93	3238.42	3852.62	2696.37	3740.59	3333.54	2743.99	2291.31	3328.36	2344.4	2652.55	3837
215	3366.42	2710.11	3751.91	3204.07	2893.17	3449.63	2772.47	3728.89	3211.98	3854.49	2696.96	3748.18	3341.45	2757.82	2277.54	3340.18	2347.05	2658.16	3837.28
216	3368.62	2732.29	3761.18	3201.11	2894.76	3452.62	2775.37	3723.82	3210.21	3853.75	2708.39	3730.16	3340.12	2758.1	2282.42	3338.47	2359.95	2647.27	3850.71
217	3365.08	2710.98	3754.02	3206.44	2898.09	3446.18	2789.01	3719.43	3210.91	3871.06	2690.49	3728.98	3328.51	2764.9	2284.03	3336.52	2359.51	2662.9	3852.8
218	3382.7	2719.23	3759.15	3186.23	2897.72	3446.14	2780.6	3729.52	3207.54	3863.27	2690.7	3729.28	3337.93	2761.35	2281.58	3333.74	2371.51	2656.45	3848.68
219	3359.44	2725.67	3766.6	3202.13	2901.05	3453.19	2778.81	3732.45	3220.74	3861.76	2690.5	3736.13	3337.45	2763.36	2299.26	3342.82	2347.93	2664.7	3846.05
220	3368.97	2718.97	3773.98	3189.74	2897.54	3453.06	2785.83	3727.84	3208.52	3864.22	2691.44	3737.88	3340.12	2765.4	2289.9	3349.95	2371.34	2655.96	3842.45
221	3377	2727.74	3769.82	3194.44	2899.91	3452.49	2788.83	3724.29	3216.39	3862.18	2693	3719.21	3332.74	2761.34	2286.71	3335.86	2369.76	2664.53	3854.51
222	3378.12	2732.1	3774.93	3184.49	2898.68	3450.97	2776.35	3721.81	3208.74	3858.98	2687.85	3730.42	3338.76	2763.21	2290.82	3329.45	2365.65	2658.81	3852.19
223	3378.15	2727.08	3761.77	3202.83	2908.12	3463.46	2785.7	3726.95	3211.96	3857.78	2705.8	3728.6	3367.57	2764.77	2284.53	3337.36	2361.66	2669.43	3851.38
224	3372.06	2723.01	3768.89	3196.21	2903.62	3452.52	2785.48	3722.93	3206.59	3862.44	2686.15	3734.39	3336.64	2760.96	2300.63	3333.4	2371.21	2671.56	3854.68
225	3367.71	2717.49	3777.12	3180.33	2893.75	3448.39	2785.86	3748.42	3200.65	3861.13	2696.62	3721.93	3340.53	2753.6	2292.16	3332.02	2362.16	2673.58	3859.36
226	3383.99	2735.35	3778.43	3181.88	2897.82	3450.79	2778.79	3728.41	3204.92	3861.87	2693.86	3714.43	3340.37	2745.88	2276.22	3336.27	2372.76	2670.07	3862.3
227	3372.24	2717.35	3768.89	3185.85	2889.78	3452.99	2789.08	3734.83	3182.79	3864.78	2693.82	3701.69	3354	2767.64	2281.87	3348.92	2370.53	2674.23	3864.78
228	3375.82	2725.03	3776.51	3195.1	2906.9	3450.87	2778.57	3737.66	3212.12	3877.08	2694.54	3706.59	3342.83	2760.11	2288.6	3343.92	2362.34	2688.37	3852.1
229	3375.42	2718.76	3786.01	3176.15	2893.09	3456.25	2782.51	3731.15	3205.68	3867.83	2694.75	3710.8	3349.14	2751.45	2302.24	3336.87	2375.22	2673.46	3864.88
230	3378.01	2720.53	3780.87	3182.14	2890.46	3450.91	2776.95	3738.88	3198.07	3865.38	2689.96	3702.78	3349.64	2757.68	2289.01	3355.3	2369.87	2670.23	3856.76
231	3375.78	2726.95	3784.66	3186.69	2888.92	3458.08	2771.97	3731.29	3208.44	3872.49	2701.37	3706.49	3334.89	2753.92	2292.63	3344.14	2372.83	2680.48	3853.41
232	3372.56	2716.6	3785.7	3183.18	2894.97	3469.44	2790.76	3737.68	3194.63	3873.7	2685.39	3700.03	3352.28	2768.39	2295.05	3346.97	2377.48	2676.35	3859.02
233	3374.97	2710.81	3775.44	3172.67	2895.98	3463.86	2776.93	3741.33	3201	3881.61	2694.62	3691.98	3351.5	2752.64	2291.22	3349.03	2376.92	2685.73	3862.18
234	3380.77	2733.26	3790.81	3175.96	2904.96	3464.72	2779.25	3745.06	3196.67	3877.15	2693.68	3699.02	3350.94	2769.42	2302.47	3332.64	2370.65	2696.75	3874.35
235	3379.33	2725.68	3797.17	3167.19	2895.76	3471.85	2776.44	3737.54	3185.93	3877.09	2708.02	3696.98	3341.26	2768.99	2282.48	3345.22	2372.29	2677.68	3872.67
236	3391.32	2724.63	3797.49	3165.23	2900.56	3461.92	2777.02	3744.38	3171.49	3874.59	2701.23	3703.08	3346.93	2763.96	2287.45	3333.63	2382.36	2674.97	3868.17
237	3379.91	2718.26	3796.87	3171.06	2895.29	3465.79	2775.88	3739.25	3188.69	3882.29	2700.71	3689.47	3341.17	2772.44	2297.81	3344.79	2380.92	2671.02	3876.35
238	3375.09	2725.47	3787.61	3163.67	2913.97	3464.06	2769.88	3745.34	3182.21	3877.67	2688.76	3691.08	3350.51	2770.8	2300.22	3342.37	2368.88	2677.77	3859.7
239	3381.11	2713.72	3797.29	3168.2	2897.32	3469.53	2790.68	3751.04	3179.86	3871.21	2695.22	3680.94	3364.95	2770.6	2300.71	3347.99	2381.27	2695.79	3874.47
240	3381.33	2726.53	3800.92	3171.83	2887.9	3457.41	2791.02	3746.29	3174.57	3879.74	2699.6	3683.78	3343.02	2761.49	2284.34	3343.94	2372.02	2688.49	3871.56
241	3379.34	2711.61	3795.98	3154.2	2909.33	3463.72	2780.78	3755.24	3187.73	3869.17	2703.8	3676.48	3340.55	2772.07	2301.07	3344.63	2365.83	2682.82	3872.09
242	3379.66	2723.1	3795.04	3172.61	2910.62	3481.29	2784.84	3741.18	3183.38	3879.92	2694.55	3666.63	3338.94	2774.5	2305.97	3336.14	2378.45	2678.56	3886.28
243	3375.34	2720.08	3792.37	3157.01	2907	3468.45	2782.55	3752.78	3174.88	3875.37	2702.02	3672.26	3343.97	2780.07	2309.57	3342.16	2378.31	2689.94	3871.87
244	3376.5	2720.67	3802.07	3149.65	2904.29	3471.38	2782.26	3743.55	3170.35	3883.56	2691.05	3666.76	3349.87	2764.17	2289.33	3348.84	2389.65	2691.9	3871.85
245	3373.89	2724.94	3806.91	3146.52	2914.59	3459.48	2770.16	3752.13	3179.55	3881.93	2701.52	3669.2	3353.07	2773.14	2299.59	3344.04	2381.1	2690.39	3876.35
246	3376.79	2717.07	3814.48	3131.57	2896.77	3463.7	2780.7	3757.6	3174.87	3886.63	2686.21	3664.58	3358.99	2768.43	2311.44	3348.42	2389.16	2699.77	3877.81
247	3374.26	2719.32	3806.27	3156.03	2902.07	3475.81	2787.91	3742.48	3172.11	3887.14	2705.51	3663.9	3350.6	2763.6	2294.97	3338.97	2382.35	2697.22	3865.31
248	3378.29	2738.82	3803.89	3139.98	2901.29	3465.41	2771.93	3751.51	3170.59	3893.74	2699.13	3666.64	3365.95	2761.17	2305.48	3334.53	2384.68	2688.94	3881.36
249	3384.55	2716.02	3817.74	3148.83	2909.64	3459.55	2779.57	3753.31	3186.8	3878.32	2696.53	3658.39	3351.32	2767.68	2311.99	3335.18	2381.85	2694.9	3880.22
250	3380.22	2715.94	3810.6	3138.07	2908.44	3461.95	2775.13	3755.51	3175.2	3888.1	2693.22	3655.87	3358.02	2763.49	2309.43	3348.2	2379.7	2699.7	3877.79
251	3397.07	2724.29	3805.13	3120.67	2900.73	3481.72	2781.64	3753.31	3172.53	3879.27	2683.36	3652.45	3350.43	2783.27	2312.77	3338.97	2388.96	2697.37	3876.28
252	3382.83	2718.58	3806.96	3135.87	2906.58	3460.85	2772.42	3757.38	3171.21	3868.08	2706.22	3636.23	3352.24	2775.19	2311.25	3343.81	2387.3	2683.36	3879.73
253	3378.35	2710.91	3810.12	3131.47	2890.63	3458.87	2773.29	3761.05	3166.05	3885.67	2689.94	3643.18	3344.53	2770.68	2301.09	3345.85	2395.04	2697.37	3878.25
254	3381.01	2705.87	3816.11	3140	2903.04	3472.29	2769.64	3766.37	3175.4	3878.29	2691.25	3645.5	3349.62	2771.56	2298.66	3352.16	2389.08	2691.02	3880.12
255	3378.11	2718.73	3806.32	3136.27	2904.11	3461.72	2776.01	3757.12	3172.3	3875.97	2686.73	3626.55	3353.94	2757.27	2304.38	3356.75	2389.06	2704.01	3878.76
256	3385.85	2727.73	3820.03	3132.65	2899.59	3470.86	2772	3756.66	3154.01	3881.78	2693.91	3644.7	3345.45	2775.52	2316.41	3352.33	2392.81	2684.49	3876.65
257	3382.94	2724.34	3813.71	3131.97	2897.31	3465.88	2783.97	3764.15	3160.24	3875.36	2702.88	3631.33	3352.88	2787.12	2295.04	3347.1	2389.54	2695.77	3885.23
258	3378.67	2711.2	3814.49	3136.69	2900.13	3473.71	2777.39	3763.78	3158.42	3870.02	2696.84	3626.84	3356.23	2785.07	2302.36	3339.48	2391.79	2689.2	3874.59
259	3376.94	2714.08	3816.81	3120.48	2903.15	3471.88	2779.6	3766.35	3157.08	3888.98	2696.01	3630.47	3355.4	2771.86	2304.87	3328.75	2405.06	2687.2	3886.41
260	3381.72	2717.98	3810.81	3119.45	2895.17	3468.35	2767.16	3755.87	3160.02	3882.37	2704.36	3641.01	3360.71	2765.42	2299.15	3339.7	2393.97	2701.78	3884.91
261	3386.11	2724.79	3816.39	3109.49	2895.3	3460.12	2787.31	3755.65	3156.95	3861.03	2697.05	3622.75	3341.47	2767.25	2308.6	3336.56	2403.54	2695.09	3882.75
262	3378.46	2717.62	3811.08	3118	2890.28	3466.52	2777.24	3765.94	3148.47	3879.86	2701.6	3634.27	3358.85	2766.44	2312.29	3342.72	2394.45	2683.76	3880.75
263	3381.88	2712.26	3813.8	3104.82	2908.6	3469.18	2768.31	3765.01	3155.12	3885.4	2689.65	3625.31	3356.82	2772.94	2305.7	3338.56	2396.32	2690.16	3888.94
264	3384.45	2707.26	3816.97	3124.96	2898.61	3469.41	2779.46	3770.49	3150.24	3892.56	2701.06	3615.39	3351.44	2760.5	2309.82	3322.74	2390.57	2687.35	3876.24
265	3369.46	2711.63	3822.99	3111.83	2894.72	3473.99	2772.46	3767.73	3156.14	3890.1	2700.58	3611.51	3365.46	2762.41	2309.94	3321.55	2392.07	2684.86	3869.7
266	3366.19	2712.63	3816.54	3110.09	2885.27	3470.77	2776.33	3769.54	3146.22	3884.66	2698.89	3614.95	3362.16	2762.91	2309.38	3326.33	2391.62	2690.91	3905.93
267	3363.96	2719.28	3827.83	3109.3	2893.47	3468.15	2780.28	3768.75	3156.29	3881.14	2698.83	3617.01	3358.19	2778.16	2299.06	3339.48	2386.35	2685.03	3891.95
268	3374.54	2707.73	3820.21	3107.87	2900.83	3474.92	2771.01	3763.28	3146.93	3882.19	2700.33	3610.19	3357.03	2779.03	2313.6	3335.71	2395.64	2683.18	3883
269	3367.72	2706.97	3821.02	3108.75	2896.13	3468.93	2766.27	3770.48	3149.12	3885.58	2697.12	3609.12	3359.25	2773.74	2320.87	3330.13	2403.26	2693.3	3897.6
270	3364.98	2707.36	3820.16	3097.07	2897.75	3471.12	2766.31	3766.98	3135.64	3876.07	2691.94	3602.99	3367.07	2784.49	2327.84	3353.11	2385.1	2685.25	3886.07
271	3365.34	2712.1	3817.49	3100.86	2905.63	3462.6	2765.84	3762.45	3150.38	3878.87	2691.47	3607.14	3361.97	2768.38	2314.08	3339.25	2373.21	2698.39	3873.59
272	3361.34	2713.04	3816.43	3110.61	2893.88	3467.85	2767.37	3753.21	3140.94	3890.01	2695.32	3599.13	3353.82	2787.8	2312.11	3322.87	2394.23	2692.3	3866.78
273	3362.18	2703.09	3808.54	3104.01	2892.99	3480.42	2775.24	3765.33	3158.96	3886.68	2695.68	3610.95	3355.46	2779.35	2312.03	3336.9	2391.41	2689.56	3884.98
274	3355.56	2715.54	3817.86	3082.48	2897.52	3479.73	2781.9	3769.76	3149.47	3891.89	2702.4	3587.02	3357.59	2786.6	2296.66	3329.96	2394.38	2701.83	3874.04
275	3364.46	2709.59	3817.95	3100.53	2892.28	3468.86	2775.47	3767.61	3127.92	3886.03	2682.51	3582.57	3357.95	2769.63	2332.03	3331.53	2383.09	2706.2	3880.44
276	3362.96	2711.47	3817.49	3083.65	2882.7	3470.79	2781.75	3776.31	3127.13	3891.41	2688.8	3576.24	3350.69	2782.93	2326.59	3334.35	2382.65	2695.48	3883.1
277	3368.35	2709.07	3831.01	3082.88	2890.49	3481.05	2764.29	3761.6	3149.37	3892.47	2698.96	3589.02	3349.49	2777.88	2310.56	3326.84	2369.93	2701.12	3873.25
278	3363.12	2702.42	3820.53	3082.35	2891.39	3478.59	2783.39	3776.65	3143.12	3884.21	2693.91	3570.3	3352.89	2780.84	2319.37	3325.34	2385.79	2703.87	3874.06
279	3379.74	2705.53	3826.87	3079.08	2889.2	3478.79	2765.03	3760.27	3131.24	3895.64	2704.1	3566.99	3359.59	2774.52	2324.31	3339.5	2393.12	2702.74	3866.32
280	3363.08	2706.15	3826.58	3090.34	2892.09	3473.75	2767.53	3759.72	3140.57	3898.75	2694.43	3573.81	3357.13	2781.49	2331.79	3331.75	2390.56	2704.94	3876.27
281	3362.54	2690.54	3826.62	3080.46	2896.88	3475.61	2783.45	3768.33	3146.39	3882.47	2687.29	3573.04	3352.68	2778.32	2320.18	3332.06	2384.85	2704.62	3877.33
282	3364.62	2700.21	3823.32	3070.93	2881.4	3471.82	2770.6	3769.45	3134.56	3885.39	2692.93	3562.44	3347.99	2781.3	2314.74	3322.66	2381.69	2704.86	3881.33
283	3362.68	2716.29	3818.33	3072.91	2889.45	3474.36	2769.18	3753.55	3130.45	3892.2	2697.91	3568	3354.02	2777.51	2323.52	3318.16	2386.04	2696.12	3877.07
284	3366.32	2699.77	3811.4	3070.24	2888.64	3462.72	2766.28	3773.29	3141.2	3881.5	2698.35	3559.93	3357.14	2770.35	2308.32	3328.26	2376.6	2690.58	3879.97
285	3368.47	2700.25	3810.54	3078.69	2883.54	3466.84	2769.94	3768.05	3140.74	3870.31	2690.59	3564.5	3350.75	2778.12	2318.85	3336.44	2382.79	2693.22	3879.05
286	3352.91	2709.28	3821.26	3062.99	2891.89	3465.4	2758.7	3775	3137.84	3878.45	2692.19	3553.03	3349.45	2774.78	2327.98	3335.43	2394.41	2709.52	3875.74
287	3362.92	2693.98	3832.13	3060.34	2893.11	3454.05	2781.78	3772.99	3132.09	3875.99	2676.74	3542.25	3344.56	2768.25	2318.8	3334.92	2393.51	2700.07	3880.21
288	3353.98	2690.39	3830.88	3059.1	2880.87	3467.79	2767.43	3771.96	3128.31	3875.63	2676.96	3552.62	3364.21	2779.28	2309.31	3327.27	2389.46	2707.58	3879.23
289	3361.17	2686.93	3817.31	3059.15	2886.01	3470.75	2772.5	3773.18	3123.93	3883.96	2669.41	3545.56	3351.04	2787.19	2322.7	3326.72	2393.72	2714.27	3870.42
290	3353.75	2707.62	3813.84	3059.9	2897.97	3471.39	2764.98	3770.49	3138.12	3890.65	2683.02	3541.06	3349.8	2782.35	2305.65	3328.3	2377.73	2696.52	3870.27
291	3338.74	2696.98	3821.8	3058.78	2886.35	3470.68	2763.29	3775.28	3138.94	3883.96	2692.64	3536.83	3360.15	2781.09	2330.04	3340.7	2383.18	2708.63	3879.44
292	3361.49	2696.76	3815.71	3061.44	2893.02	3468.16	2763.15	3770.4	3136.23	3881.22	2684.69	3528.3	3354.02	2788.33	2307.31	3311.7	2374.43	2699.77	3873.93
293	3350.26	2701.19	3816.12	3052.12	2894.32	3475.46	2778.75	3776.74	3124.5	3893.96	2694.73	3538.95	3358.76	2771.41	2324.67	3335.32	2393.98	2698.76	3877.3
294	3349.66	2705.25	3815.56	3047.66	2880.05	3468.92	2755.47	3761.46	3124.37	3871.05	2673.43	3531.73	3364.06	2774.45	2309.72	3320.62	2382.11	2694.88	3875.08
295	3344.78	2686.83	3823.6	3046.4	2886.21	3466.9	2770.94	3786.21	3133.68	3868.91	2675.59	3525.52	3350.85	2769.48	2310.05	3321.72	2397.36	2691.57	3866.18
296	3327.41	2699.57	3813.61	3047.67	2878.84	3468.57	2767.53	3769.1	3115.42	3875.04	2678.14	3531.76	3345.61	2793.96	2316.63	3328.27	2384.16	2691.82	3880.08
297	3353.16	2690.33	3804.24	3044.96	2880.44	3451.02	2763.66	3764.01	3121.22	3875.63	2691.32	3512.79	3335.73	2798.67	2319.27	3313.99	2383.26	2688.4	3877.67
298	3354.95	2685.58	3818.31	3048.68	2883.84	3468.92	2763.51	3767.02	3114.59	3886.05	2702.85	3522.08	3355.16	2775.87	2307.71	3329.88	2386.61	2705.29	3865.22
299	3352.32	2695.01	3815.07	3033.73	2868.83	3464.91	2765.35	3771.42	3135.77	3885.97	2682.61	3515.16	3353.21	2777.59	2325.66	3319.26	2386.57	2696.88	3874.11
300	3333.19	2685.7	3801.68	3036.4	2866.84	3465.49	2759.27	3775.79	3118.97	3874.74	2683.46	3508.69	3342.27	2768.84	2319.99	3326.58	2385.53	2702.74	3861.67
301	3334.04	2688.39	3821.08	3034.52	2875.03	3458.89	2764.83	3774.05	3120.63	3880.5	2683.1	3521.15	3334.19	2782.14	2310.05	3325.37	2394.92	2703.95	3869.59
302	3345.89	2691.78	3819.73	3039.91	2874.5	3466.54	2762.47	3773.92	3125.65	3874.86	2681.4	3514.71	3344.05	2781.41	2311.64	3308.31	2389.73	2677.88	3877.17
303	3334.26	2695.06	3814.77	3032.75	2862.67	3462.34	2772.34	3774.66	3119.47	3876.34	2679.11	3504.53	3353.41	2763.5	2324.23	3312.05	2389.93	2695.15	3867.8
304	3332.41	2687.09	3825.46	3032.56	2880.37	3456.08	2761.8	3765.89	3107.72	3870.07	2672.22	3504.31	3351.16	2784.28	2319.49	3318.65	2378.69	2696.47	3867.55
305	3328.05	2695.93	3819.11	3013.56	2867.28	3469.85	2753.51	3768.23	3116.79	3869.9	2670.34	3499.62	3343.58	2779.16	2325.44	3318.29	2382.87	2685.11	3878.28
306	3325.93	2692.71	3814.51	3033.86	2865.3	3471.04	2765.18	3772.17	3110.6	3874.99	2670.44	3502.68	3355.32	2779.66	2324.84	3318.88	2389.63	2678.87	3867.82
307	3339.76	2685.85	3827.36	3030.1	2866.98	3453.2	2767.22	3778.69	3108.13	3883.78	2688.21	3498.49	3353.38	2766.22	2311.16	3307.44	2374.12	2677.2	3871.73
308	3329.89	2677.43	3819.61	3022.53	2871.47	3475.95	2760.23	3772.67	3110.81	3877.54	2684.25	3501.41	3346.41	2790.99	2313.76	3305.93	2392.41	2696.58	3874.14
309	3328.66	2683.67	3815.75	3032.51	2867.02	3467.45	2761.47	3782.69	3113.42	3879.88	2690.96	3497.18	3347.2	2756.8	2329.78	3320.24	2383.73	2702	3861.5
310	3332.63	2688.64	3818.77	3027.04	2866.69	3466.24	2760.38	3754.54	3115.77	3862.11	2682.24	3492.55	3344.95	2768.9	2318.9	3308.92	2388.42	2689.47	3869.79
311	3330.56	2679.24	3829.57	3019.7	2872.06	3451.05	2755.93	3762.79	3113.98	3874.74	2694.61	3500.26	3351.58	2762.52	2320.33	3319.83	2384.4	2685.57	3851.56
312	3326.08	2690.76	3823.07	3015.96	2861.64	3458.05	2766.7	3772.45	3119.72	3880.48	2692.62	3473.22	3339.26	2768.98	2315.61	3315.69	2385.35	2693.35	3857.43
313	3328.65	2675.13	3812.04	3023	2862.9	3460.41	2748.37	3772.18	3109.68	3883.47	2685.63	3477.15	3336.36	2779.35	2332.31	3316.98	2378.64	2694.58	3859.65
314	3328.82	2679.21	3809.55	3010.47	2864.92	3460.56	2758.86	3764.34	3112.76	3891.17	2680.12	3478.01	3346.84	2775.98	2325.7	3306.48	2376.98	2693.44	3859.88
315	3331.7	2695.69	3806.06	3023.92	2856.6	3464.98	2760.85	3760.67	3110.77	3868.42	2667.09	3477.46	3345.45	2773.29	2329.54	3311.56	2379.4	2677.32	3851.92
316	3330.19	2685.5	3813.14	3018.75	2862.07	3456.75	2755.29	3763.34	3109.45	3878.42	2684.24	3467.43	3364.66	2759.69	2310.34	3299.69	2380.44	2691.56	3865.9
317	3325.17	2672.6	3802.98	3005.16	2856.05	3455.67	2759.19	3768.9	3098.17	3876.99	2671	3468.96	3342.7	2785.09	2325.14	3301.91	2372.6	2692.11	3859.13
318	3328.01	2671.14	3813.36	3011.63	2858.1	3453.55	2757.61	3773.15	3104.27	3868.35	2688.68	3486.95	3342.07	2774.88	2329.16	3309.82	2388.57	2681.69	3851.52
319	3315.19	2673.57	3805.66	3022.23	2865.48	3457.37	2755.09	3765.65	3102.77	3862.77	2669.39	3464.19	3339.76	2782.1	2320.93	3301.52	2378.33	2679.23	3860.77
320	3327.92	2677.24	3821.21	3005.6	2861.6	3459.76	2753.48	3761.13	3099.01	3873.89	2682.09	3464.46	3348.61	2785.63	2327.06	3301.24	2379.77	2674.82	3846.14
321	3312.65	2678.91	3816.3	3006.4	2857.57	3454.03	2761.22	3770.94	3102.4	3868.54	2659.76	3454.85	3348.74	2767.83	2343.71	3308.95	2381.25	2687.04	3860.28
322	3319.24	2669.94	3814.35	3010.1	2851.86	3456.26	2752.81	3769.14	3100.39	3869.54	2664.84	3455.63	3342.75	2781.63	2326.81	3304.11	2369.88	2690.18	3850.79
323	3304.94	2678.27	3814.28	2998.04	2860.69	3460.29	2765.96	3762.41	3111.54	3857.4	2655.43	3459.23	3342.3	2772.18	2322.23	3298.21	2380.92	2680.83	3842.95
324	3306.83	2682.76	3806.61	3000.19	2852.13	3453.05	2771.56	3763.44	3098.66	3867.64	2681.47	3454.72	3348.11	2768.62	2325.79	3305.26	2380.82	2684.72	3855.93
325	3311.36	2677.95	3807.06	3002.54	2843.29	3453.98	2748.73	3759.54	3098.3	3866.9	2666.99	3439.01	3341.16	2765.2	2319.23	3307.03	2386.12	2682.27	3848.9
326	3316.07	2672.65	3812.38	3001.81	2855.23	3458.78	2755.8	3759.56	3095.55	3871.81	2675.43	3437.83	3332.26	2768.47	2322.57	3293.22	2367.89	2674.78	3847.08
327	3317.19	2668.97	3808.52	2994.65	2857.09	3456.61	2765.69	3761.43	3097.67	3855.62	2654.16	3437.54	3338.53	2776.32	2333.29	3285.12	2385.01	2678.19	3856.83
328	3307.96	2670.12	3805.21	2991.96	2850.87	3444.7	2746.89	3770.04	3100.17	3859.98	2675.46	3444.16	3329.92	2772.76	2329.21	3304.6	2377.18	2674.11	3846.64
329	3305.35	2669.36	3811.79	2988.84	2848.31	3457.07	2751.13	3766.79	3088.59	3859.79	2671.39	3436.66	3331.92	2764.85	2326.98	3303.03	2370.44	2684.15	3847.27
330	3306.9	2671.46	3790.94	2988.77	2851.96	3465.29	2743.31	3773.38	3091.07	3864.43	2664.56	3436.28	3333.9	2766.39	2320.55	3287.94	2373.49	2679.83	3848.4
331	3314.93	2666.31	3810.63	2997.38	2858.03	3454.56	2735.39	3764.93	3099.2	3866.91	2666.28	3436.28	3336.06	2768.9	2341.23	3300.63	2361.52	2674.01	3837.18
332	3298.7	2665.63	3807.52	2977.22	2853.42	3448.11	2755.66	3763.02	3095.64	3859.72	2672.37	3430.93	3333.19	2756.78	2326.65	3301.41	2375.97	2686.33	3840.66
333	3304.6	2670.41	3809.36	2978.68	2853.76	3457.55	2745.5	3761.27	3090.42	3858.69	2665.09	3417.59	3344.52	2764.03	2330.27	3297.98	2370.28	2678.94	3847.44
334	3317.34	2666.82	3794.44	2984.17	2849.24	3446.76	2749.79	3758.43	3098.4	3856.53	2675.43	3439.95	3343.09	2772.32	2320.94	3303.12	2378.84	2694.49	3847.28
335	3295.87	2665.01	3805.99	2984.77	2848.63	3455.44	2750.94	3763.12	3084.57	3849.04	2674.46	3429.72	3347.15	2757.86	2330.81	3295.62	2360	2682.31	3848.02
336	3301.78	2662.76	3810.74	2974.77	2852.79	3453.89	2749.03	3770.04	3092.49	3852.53	2682.01	3419.08	3337.58	2760.33	2334	3294.12	2363.86	2682.74	3842.09
337	3298.85	2669.43	3802.95	2982.18	2851.12	3451.75	2741.29	3765.11	3085.89	3861.95	2665.09	3412.26	3350.62	2766.69	2324.74	3289.84	2384.83	2682.66	3845.9
338	3294.21	2679.25	3796.27	2968.64	2852.1	3445.5	2748.88	3761.69	3087.58	3855.76	2664.05	3409.18	3334.77	2772.45	2333.61	3278.36	2371.94	2664.32	3844.83
339	3283.8	2665.6	3811.59	2977.29	2856.77	3450.94	2751.11	3758.36	3087.76	3855.29	2660.46	3408.77	3337.52	2771.68	2323.54	3281.55	2374.46	2677.25	3838.27
340	3302.72	2655.8	3803.65	2968.63	2852.3	3447.07	2749.91	3758.12	3077.32	3852.41	2660.31	3409.3	3335.01	2766.98	2313.52	3272.35	2377.65	2688.91	3839.93
341	3296.3	2655.08	3805.69	2967.29	2844.38	3433.8	2744.66	3757.69	3088.56	3844.1	2672.62	3410.32	3347.39	2769.72	2322.29	3294.33	2368.04	2670.32	3851.37
342	3277.62	2663.79	3809.05	2966.57	2845.53	3442.31	2748.52	3751.84	3084.89	3866.11	2669.1	3394.89	3332.19	2775.41	2305.89	3285.5	2363.88	2678.99	3835.78
343	3292.3	2659.16	3798.06	2964.47	2848.79	3443	2752.91	3759.54	3084.54	3861.37	2660.37	3387.06	3335.94	2765.45	2333.55	3277.91	2383.08	2689.97	3857.62
344	3285.36	2653.25	3790.46	2961.38	2834.32	3435.61	2754.84	3761.35	3080.49	3855.7	2667.71	3391.3	3340.11	2772.6	2321.81	3284.82	2379.44	2678.68	3831.19
345	3296.02	2664.05	3799.69	2968.22	2831.53	3438.03	2741.2	3753.11	3069.73	3860.9	2659.11	3399.46	3340.56	2774.99	2315.91	3290.25	2353.57	2676.33	3846.39
346	3291.03	2658.19	3798.22	2967.21	2841.97	3451.05	2749.24	3754.81	3082.29	3856.37	2655.54	3381.11	3336.84	2775.89	2316.65	3296.21	2358.14	2672.54	3819.85
347	3290.76	2660.5	3791.82	2961.76	2835.99	3446.03	2754.92	3753.78	3085.74	3843.43	2660.48	3384.81	3332.69	2767	2325.64	3277.8	2373.82	2673.78	3831.87
348	3290.57	2661.06	3805.06	2970.82	2831.08	3453.59	2742.21	3761.09	3075.94	3840.55	2667.07	3376.24	3338.38	2761.48	2317.09	3284.37	2376	2678.55	3842.75
349	3290.29	2662.49	3796.94	2976.39	2832.07	3440.33	2755.86	3757.25	3081.77	3851.81	2652.68	3377.05	3333.71	2766.2	2330.49	3291.35	2367.33	2667.59	3820.65
350	3283.76	2646.19	3796.86	2968.7	2835	3454.56	2730.49	3752.25	3077.75	3847.2	2658.72	3385.03	3347.73	2758.5	2324.86	3271.24	2362.65	2672.46	3831.78
351	3264.61	2660.02	3803.44	2975.97	2838.04	3442.28	2770.66	3756.28	3073.61	3854.64	2651.4	3380.35	3339.07	2772.64	2329.76	3265.62	2365.32	2668.57	3831.67
352	3267.69	2655.08	3783.58	2957.97	2834.01	3442.98	2780.48	3757.65	3061.24	3853.19	2659.93	3382.31	3338.83	2751.47	2328.48	3279.66	2364.64	2662.48	3827.13
353	3262.73	2656.1	3796.31	2954.47	2827.68	3444.56	2745.75	3744.55	3081.86	3847.47	2651.19	3366.96	3342.17	2758.18	2316.39	3275.82	2360	2667.2	3838.56
354	3280.05	2649.29	3799.63	2958.53	2831.99	3460.73	2745.29	3748.08	3074.61	3840.58	2651.64	3371.83	3335.65	2757.75	2323.81	3259.09	2358.1	2676.71	3833.59
355	3269.91	2645.56	3788.12	2957.17	2827.42	3445.8	2733.08	3764	3063.56	3847.27	2654.84	3369.55	3342.27	2768.93	2320.11	3273.21	2377.94	2663.84	3837.1
356	3274.5	2649.1	3789.44	2962.05	2838.18	3435.15	2759.03	3753.47	3073.24	3835.07	2670.86	3371.19	3325.6	2760.71	2321.38	3276.59	2346.77	2668.7	3827.19
357	3278.14	2654.72	3783.89	2962.3	2838.96	3453.79	2747.34	3748.48	3079.43	3840.75	2651.28	3376.59	3331.47	2755.98	2317.28	3271.49	2362.08	2657.79	3833.85
358	3264.6	2645.92	3793.18	2970.83	2838.86	3447.69	2738.71	3755.8	3075.9	3838.73	2662.06	3367.04	3332.24	2761.66	2340.14	3277.71	2359.27	2652.39	3833.97
359	3256.98	2660.9	3789.47	2946.45	2816.99	3434.04	2755.65	3762.35	3073.47	3842.97	2655.72	3350.6	3330.01	2759.95	2321.4	3279.25	2360.85	2671.19	3819.79
360	3270.19	2662.21	3779.11	2956.15	2822.88	3438.77	2747.52	3756.05	3074.49	3845.08	2658.56	3354.95	3330.04	2763.5	2336.3	3277.95	2362.31	2657.41	3820.56
361	3269.42	2647.37	3782.68	2942.69	2827.86	3433.54	2753.03	3761.87	3057.98	3841.62	2652.97	3357.85	3330.13	2748.37	2314.67	3279.83	2374.12	2660.67	3831.65
362	3262.49	2645.73	3791.07	2948.8	2829.73	3443.34	2736.63	3753.77	3058.03	3838.5	2648.16	3355.1	3338.27	2755.01	2322.73	3263.29	2360.94	2660.17	3826.85
363	3254.3	2644.76	3778.85	2955.41	2845.94	3444.2	2741.69	3760.64	3056.63	3853.44	2670.23	3354.03	3332.59	2761.7	2328.71	3270.46	2362.6	2661.68	3819.58
364	3264.97	2658.51	3772.57	2954.34	2821.09	3439.75	2748.98	3752.33	3062.79	3828.52	2658.13	3342.43	3333.81	2762.4	2315.55	3272.5	2357.54	2670.79	3823.05
365	3272	2656.05	3773.97	2942.77	2828.07	3439.19	2734.57	3755.2	3067.99	3848.43	2652.99	3337.13	3337.14	2758.22	2315.3	3270.1	2364.47	2651.87	3830.83
366	3260.6	2653.52	3787.06	2945.73	2822.58	3439.03	2739.77	3762.01	3064.66	3837.58	2659.11	3345.12	3323.8	2750.9	2330.69	3262.79	2361.92	2664.85	3819.9
367	3254.93	2652.89	3783.71	2948.55	2822.1	3430.73	2739.33	3766.59	3064.83	3845.19	2643.57	3352.26	3327.28	2749.23	2310.18	3269.34	2367.42	2668.67	3816.73
368	3258.6	2646.32	3785.68	2936.54	2823.05	3427.3	2751.13	3753.5	3054.08	3839.29	2653.17	3332.9	3339.86	2761.63	2314.75	3257.19	2366.4	2659.71	3825.88
369	3251.4	2647.99	3774.57	2949.81	2824.21	3445.21	2748.14	3751.3	3055.97	3834.83	2643.48	3330.87	3322.25	2775.2	2322.66	3266.5	2365.89	2656.6	3817.29
370	3261.44	2650.61	3790.69	2941.18	2816.35	3426.67	2736.93	3752.85	3059.85	3841.04	2652.57	3337.65	3325.28	2775.55	2316.03	3263.07	2361.65	2669.12	3815.42
371	3254.29	2648.49	3781.47	2943.91	2821.36	3438.72	2751.21	3763.63	3067.66	3844.06	2647.49	3336.52	3336.57	2774.04	2304.56	3261.81	2353.66	2641.52	3810.12
372	3252.74	2647.84	3784.47	2931.48	2814.52	3437.77	2741.23	3742.45	3052.68	3829.37	2657.86	3339.33	3321.73	2752.57	2313.03	3265.67	2363.97	2647.59	3814.6
373	3249.03	2638.54	3789.01	2931.19	2821.14	3426.99	2741.64	3755.62	3061.83	3820.26	2637.2	3336.39	3333.11	2757.89	2326.22	3281.17	2365.4	2658.94	3811.27
374	3252.51	2645.14	3770.47	2930.42	2830.65	3439.07	2745.17	3754.66	3059.56	3837.47	2653.53	3334.28	3330.95	2749.55	2323.75	3267.64	2350.14	2663.92	3808.16
375	3251.31	2639.89	3766.1	2940.24	2817.13	3426.18	2741	3755.11	3053.96	3833.5	2647.5	3322.94	3328.63	2753.53	2315.98	3267.8	2357.44	2652.78	3815.11
376	3250.5	2638.29	3760.5	2926.19	2811	3434.85	2730.92	3744.3	3054.26	3842.13	2646.53	3326.84	3338.84	2751.59	2326.3	3257.3	2350.67	2667.69	3819.33
377	3251.25	2632.98	3753.36	2936.66	2817.81	3436.79	2737.35	3752.63	3057.98	3825.6	2662.29	3311.1	3329.11	2753.51	2312.75	3255.82	2358.4	2670.66	3811.83
378	3255.23	2642.83	3772.61	2930.04	2809.29	3429.28	2737.66	3750.56	3058.29	3832.67	2654.93	3308.49	3354.11	2744.37	2315.26	3249.54	2351.58	2661.18	3811.44
379	3253.04	2630.2	3770.54	2931.77	2801.07	3440.64	2746.78	3762.63	3060.13	3836.41	2641.63	3319.61	3334.76	2759.15	2326	3264.08	2361.93	2650.7	3807.75
380	3238.3	2645.73	3762.38	2927	2805.52	3437.67	2736.78	3754.16	3049.32	3849.62	2635.5	3325.5	3332.34	2755.08	2331.45	3262.18	2349.06	2665.18	3813.11
381	3243.73	2643.45	3779.5	2935.06	2812.26	3429.5	2746.18	3748.61	3056.92	3831.25	2652.79	3314.28	3329.62	2753.72	2320.28	3257.24	2347.46	2654.03	3803.77
382	3235.88	2650.68	3763.69	2932.97	2812.97	3419.11	2736.58	3758.39	3060.02	3830.08	2657.02	3312.31	3337.49	2753.95	2309.54	3275.54	2350.81	2656	3822.75
383	3241.91	2629.73	3776.29	2935.59	2808.06	3431.71	2732.23	3732.46	3054.94	3833.88	2649.23	3314.9	3334.71	2747.52	2316.27	3254.67	2348.65	2659.99	3810.21
384	3245.73	2640.41	3774.35	2928.45	2808.5	3422.27	2743.6	3758.93	3057.21	3823.09	2638.87	3308.63	3322.57	2750.3	2329.63	3258.79	2353.98	2655.57	3799.88
385	3230.55	2641.69	3777.96	2923.74	2800.72	3426.12	2740.68	3746.61	3049.55	3819.07	2646.53	3305.82	3321.76	2750.02	2325.72	3245.58	2355.36	2669.83	3798.74
386	3234.75	2631.86	3776.7	2922.76	2806.06	3436.76	2732.36	3755.62	3054.36	3821.5	2640.62	3303.75	3323.76	2744.79	2324.43	3260.99	2344.2	2660.41	3806.24
387	3235.64	2638.27	3766.39	2925.54	2817.61	3422.74	2734.71	3754.03	3066.97	3831.83	2651.23	3287.84	3318.12	2749.3	2337.91	3259.96	2347.91	2661.2	3798.77
388	3236.52	2636.07	3765.73	2922.26	2794.06	3431.16	2728.74	3758.06	3042.6	3822.68	2649.18	3288.86	3334.03	2756.33	2323.35	3244.8	2344.66	2652.24	3796.88
389	3229.2	2645.8	3774.52	2939.3	2815.93	3443.93	2737.67	3742.96	3052.89	3833.38	2640.32	3294.17	3322.71	2752.48	2333.02	3261.79	2355.52	2654.93	3799.03
390	3231.89	2634.76	3769.01	2927.81	2806	3425.55	2731.04	3753.96	3067.71	3833.72	2644.71	3299.96	3319.39	2741.22	2330.63	3256.52	2349.26	2637.19	3795.9
391	3243.66	2649.74	3762.41	2934.85	2799.83	3426.76	2735.12	3747.43	3041.54	3826.36	2643.75	3286.76	3329.11	2752.64	2324.04	3249.06	2339.38	2658.93	3794.69
392	3232.04	2627.78	3761.07	2933.99	2809.04	3437.14	2723.48	3755.14	3056.9	3818.76	2647.12	3284	3323.23	2754.27	2317.52	3263.15	2357.38	2648.01	3799.03
393	3223.58	2628.12	3767.51	2918.95	2804.65	3433.94	2729.81	3752.61	3058.71	3819.42	2639.87	3276.04	3332.73	2759.66	2318.73	3256.35	2347.96	2651.64	3796.51
394	3234.69	2634.01	3764.02	2928.52	2807.09	3415.58	2738.73	3759.43	3047.11	3809.67	2645.48	3281.05	3332.18	2741.96	2332.81	3258.43	2333.77	2654.15	3798.6
395	3232.08	2622.56	3758.96	2918.31	2798.72	3428.32	2732.48	3746.02	3057.82	3814.61	2653.68	3276.97	3326.07	2763.27	2325.31	3240.94	2344.48	2653.41	3799.67
396	3224.16	2634.07	3773.29	2907.95	2805.06	3421.64	2733.95	3740.45	3046.87	3822.07	2656.74	3281.52	3339.51	2741.73	2320.54	3254.18	2349.51	2644.06	3798.51
397	3233.05	2630.95	3768.06	2917.16	2809.99	3434.1	2733.51	3754.36	3052.6	3826.11	2640.6	3273.91	3320.47	2739.72	2324.7	3246.67	2341.11	2638.9	3797.96
398	3226.3	2626.48	3768.4	2926.49	2808.09	3422.85	2739.88	3763.3	3035.97	3821.15	2638.52	3265.15	3312.4	2754.57	2332.62	3239.59	2355.64	2637.21	3794.17
399	3224.62	2631.4	3762.44	2923.36	2797.91	3440.57	2723.19	3765.7	3047.6	3822.7	2645.19	3272.13	3328.4	2740.2	2323.96	3247.4	2352.61	2648.58	3795.51
400	3222.37	2638.09	3762.13	2920.79	2801.79	3427.08	2741.27	3753.66	3040.94	3834.28	2648.4	3277.29	3328.23	2749.58	2327.16	3252.02	2341.39	2641.75	3786.68
401	3219.2	2633.42	3753.91	2916.68	2809.63	3417.29	2731.04	3746.29	3039.65	3837.6	2630.16	3281.84	3321.58	2748.85	2315.94	3243.96	2347.88	2639.79	3794.26
402	3226.43	2631.82	3771.54	2913.63	2796.96	3429.17	2723.24	3755.67	3041.23	3828.92	2640.62	3251.71	3320.81	2746.22	2324.5	3246.08	2350.91	2651.8	3801.92
403	3215.26	2629.15	3756.22	2923.39	2790.85	3429.27	2734.01	3750.12	3038.67	3836.53	2639.84	3264.35	3322.08	2745.74	2316.69	3251.38	2343.75	2630.6	3800.52
404	3223.76	2624.96	3756.49	2905.43	2802.09	3418.47	2729.86	3748.01	3045.12	3831.22	2650.59	3275.63	3321.04	2736.21	2335.4	3240.63	2347.09	2643.12	3797.9
405	3224.94	2630.17	3755.5	2912.27	2793.59	3413.6	2723.29	3760.82	3055.7	3824.56	2634.91	3256.1	3315.15	2750.58	2317.94	3244.76	2344.96	2636.17	3793.55
406	3221.64	2621.48	3750.7	2906.7	2801.01	3422.22	2740.26	3744.28	3045.29	3824.69	2641.23	3256.73	3312.53	2753.31	2319.73	3250.77	2341	2651.64	3794.69
407	3218.55	2623.78	3756.96	2913.47	2792.61	3416.77	2733	3751.72	3026.15	3818.96	2634.26	3255.56	3315.4	2754.93	2303.84	3244.45	2346.67	2642.08	3791.71
408	3217.53	2612.24	3748.78	2915.51	2799.16	3406.49	2729.88	3751.54	3042.63	3816.91	2637.71	3256.89	3308.93	2742	2314.73	3241.71	2345.77	2651.03	3804.95
409	3215.87	2632.55	3746.22	2918.4	2791.64	3425.23	2741.09	3744.72	3044.8	3824.63	2647.81	3258.07	3311.91	2750.26	2311.12	3237.99	2341.66	2641.03	3792.45
410	3208.33	2617.14	3752.53	2914.49	2798.08	3424.27	2728.45	3745.76	3044.12	3823.15	2642.65	3241.3	3312.29	2745.01	2310.95	3250.36	2341.84	2639.1	3784.49
411	3218.55	2620.18	3745.69	2894.11	2790.17	3416.1	2729.28	3745.66	3042.78	3815.64	2644.67	3251.51	3305.37	2749.87	2328.79	3243.77	2343.87	2656.3	3796.74
412	3202.94	2630.44	3748.34	2918.89	2792.56	3412.2	2716.87	3757.86	3047.3	3834	2629.66	3228.08	3309.69	2752.66	2314.33	3244.07	2336.25	2638.92	3787.55
413	3220.29	2618.38	3751.34	2912.42	2789.95	3416.01	2719.56	3752.32	3042.62	3821.11	2635.16	3237.79	3301.87	2767.66	2318.73	3248.07	2342.41	2640.72	3783.3
414	3211.23	2628.24	3748.95	2906.69	2792.25	3433.89	2720.82	3742.26	3040.14	3815.9	2629.44	3243.64	3311.28	2755.21	2315.29	3257.6	2347.47	2632.51	3775.57
415	3203.42	2613.19	3752.69	2913.54	2786.59	3411.8	2725.2	3738.57	3040.82	3831.07	2645.16	3240.02	3304.32	2739.54	2320.48	3241.54	2339.9	2632.59	3788.15
416	3196.62	2623.09	3745.28	2913.19	2784.68	3412.79	2726.06	3743.82	3041.42	3819.25	2643.49	3227.39	3314.95	2732.94	2324.12	3222.67	2329.8	2637.48	3780.27
417	3199.88	2626.71	3736.82	2898.15	2780.74	3415.31	2726.33	3746.11	3041.84	3817.38	2631.65	3224.65	3315.65	2733.35	2308.62	3242.06	2334.14	2626.21	3787.32
418	3211.09	2623.69	3747.08	2897.79	2782.27	3401.86	2729.36	3737.88	3051.27	3802.08	2644.04	3237.08	3314.14	2752.69	2320.67	3239.4	2338.53	2638.94	3783.77
419	3197.22	2624.65	3744.13	2902.35	2780.9	3417.71	2727.38	3745.98	3037.38	3838.87	2627.17	3224	3305.12	2749.86	2319.47	3239.94	2346.53	2645.31	3779.67

## Sheet: average
	1	2	3	4	5	6	7	8	9	10	11	12	13	14	15	16	17	18	19		1	2	3	4	5	6	7	8	9	10	11	12	13	14	15	16	17	18	19		10
1	2270.91	1917.85	2579.9	2348.6	1988.87	2350.79	2015.6	2523	2369.6	2692.97	1854.15	2694.53	2235.65	1853.91	1574.92	2320.46	1580.59	1752.4	2506.33		100	100	100	100	100	100	100	100	100	100	100	100	100	100	100	100	100	100	100		100	4.61061e-15	1
2	2259.26	1900.62	2579.6	2345.52	1993.13	2361.96	2006.07	2518.87	2358.82	2680.64	1831.15	2708.37	2220.14	1852.22	1583.77	2322.81	1575.94	1741.34	2511.58		99.4871	99.1019	99.9885	99.8688	100.214	100.475	99.5275	99.8363	99.545	99.5419	98.7595	100.514	99.3063	99.9087	100.562	100.101	99.7055	99.3691	100.209		99.7905	0.477826	2
3	2274.34	1922.32	2565.83	2351.06	1988.23	2355.74	2003.82	2524.4	2358.75	2687.16	1841.24	2704.46	2230.58	1870.19	1582.42	2318.79	1577.93	1758.4	2509.22		100.151	100.233	99.4546	100.105	99.9678	100.21	99.4158	100.055	99.542	99.7843	99.304	100.369	99.7735	100.878	100.476	99.9278	99.8318	100.342	100.115		99.9967	0.388292	3
4	2289.31	1919.66	2581.41	2354.3	1993.42	2356.63	1998.06	2527.07	2366.65	2690.18	1845.59	2710.13	2225.26	1867.18	1579.41	2328.53	1580.87	1735.8	2529.6		100.81	100.094	100.058	100.243	100.229	100.248	99.1302	100.161	99.8755	99.8963	99.5385	100.579	99.5353	100.716	100.285	100.348	100.017	99.0526	100.928		100.092	0.498865	4
5	2273.29	1915.96	2584.18	2356.17	1986.6	2369.2	2015.02	2537.17	2367.34	2681.31	1854.04	2696.69	2247.91	1872.57	1599.77	2323.36	1588.49	1746.34	2530.12		100.105	99.9016	100.166	100.322	99.8855	100.783	99.9713	100.562	99.9045	99.567	99.9942	100.08	100.549	101.007	101.577	100.125	100.5	99.6543	100.949		100.295	0.499145	5
6	2268.47	1902.1	2576.98	2354.39	1990.09	2391.46	2034.27	2538.39	2349.48	2702.41	1861.18	2712.87	2231.5	1872.23	1586.66	2327.71	1582.14	1754.31	2523.77		99.8925	99.1787	99.8867	100.247	100.061	101.73	100.926	100.61	99.1509	100.351	100.379	100.681	99.8145	100.988	100.745	100.312	100.098	100.109	100.696		100.308	0.598331	6
7	2286.82	1917.9	2578.08	2347.22	1996.35	2383.85	2025.9	2534.84	2363.57	2688.62	1851.63	2710.06	2230.31	1879.43	1591.79	2335.62	1591.37	1746.26	2517.12		100.701	100.003	99.9295	99.9413	100.376	101.406	100.511	100.469	99.7457	99.8383	99.8642	100.577	99.7612	101.377	101.071	100.653	100.682	99.6496	100.43		100.368	0.526781	7
8	2276.44	1918	2579.31	2357.19	1991.74	2378.94	2011.88	2537.34	2361.01	2691.39	1848.73	2709.32	2230.72	1877.09	1571.47	2323.36	1585.58	1751.89	2527		100.243	100.008	99.9771	100.366	100.144	101.197	99.8156	100.568	99.6377	99.9414	99.7078	100.549	99.7796	101.25	99.7809	100.125	100.316	99.9712	100.825		100.221	0.461848	8
9	2297.72	1918.22	2585.7	2361.6	1995.47	2391.57	2017.72	2540.58	2364.35	2681.61	1846.13	2726.54	2231.1	1876.66	1585.22	2344.3	1586.31	1748.4	2527.65		101.181	100.019	100.225	100.553	100.332	101.735	100.105	100.697	99.7785	99.5782	99.5675	101.188	99.7967	101.227	100.653	101.027	100.362	99.7716	100.851		100.455	0.615271	9
10	2289.49	1923.48	2595.74	2367.04	2000.68	2370.99	2010.62	2558.57	2374.14	2697.23	1866.3	2723.18	2237.77	1862.54	1596.4	2329.31	1588.03	1748.5	2528.81		100.818	100.294	100.614	100.785	100.594	100.859	99.7529	101.41	100.192	100.158	100.656	101.063	100.095	100.465	101.364	100.381	100.471	99.7777	100.897		100.56	0.450236	10
11	2294.24	1915.56	2587.76	2375.41	1993.96	2388.87	2021.41	2547.82	2367.62	2692.11	1846.62	2710.22	2238.46	1891.88	1584.27	2338.24	1588.85	1751.46	2524.35		101.027	99.8808	100.305	101.141	100.256	101.62	100.289	100.984	99.9165	99.968	99.5944	100.582	100.126	102.048	100.593	100.766	100.522	99.9464	100.719		100.541	0.610973	11
12	2279.55	1907.08	2601.36	2353.49	1991.76	2381.44	2012.55	2545.04	2389.01	2694.35	1840.21	2727.24	2235.5	1892.19	1588.03	2340.62	1580.68	1746.51	2528.77		100.38	99.4383	100.832	100.208	100.145	101.304	99.849	100.873	100.819	100.051	99.2484	101.214	99.9933	102.065	100.832	100.869	100.006	99.6641	100.895		100.457	0.690863	12
13	2276.76	1911.35	2590.75	2367.21	1991.81	2380.64	2010.35	2550.78	2370.18	2686.34	1845.63	2725.69	2239.77	1889.19	1590.7	2349.32	1593.11	1762.57	2533.37		100.257	99.6614	100.421	100.792	100.148	101.269	99.7396	101.101	100.025	99.7537	99.5409	101.157	100.184	101.903	101.002	101.244	100.792	100.58	101.079		100.56	0.643705	13
14	2296.07	1918.53	2590.42	2363.71	1999.45	2378.06	2009.94	2561.93	2373.74	2689.51	1857.25	2714.38	2244.41	1890.92	1590.38	2341.91	1592.35	1756.53	2537.44		101.108	100.036	100.408	100.643	100.532	101.16	99.7195	101.543	100.175	99.8715	100.168	100.737	100.392	101.996	100.981	100.924	100.744	100.236	101.241		100.664	0.573376	14
15	2268.69	1927.12	2602.78	2353.02	2004.11	2382.75	2007.74	2551.41	2376.03	2694.84	1850.43	2740.31	2257.14	1894.9	1580.23	2360.07	1584.17	1764.94	2536.88		99.9024	100.483	100.887	100.188	100.766	101.36	99.6105	101.126	100.271	100.069	99.7995	101.699	100.961	102.211	100.337	101.707	100.226	100.716	101.219		100.713	0.694602	15
16	2297	1921.21	2592.84	2357.05	1999.71	2390.18	2006.01	2550.26	2393.8	2707.08	1860.98	2715.54	2257.09	1901.79	1592.73	2349.77	1593.36	1780.28	2537.82		101.149	100.175	100.502	100.36	100.545	101.676	99.5245	101.081	101.021	100.524	100.369	100.78	100.959	102.583	101.131	101.263	100.808	101.591	101.256		100.91	0.639643	16
17	2298.94	1928.58	2600.96	2385.45	2007.5	2404.32	2008.84	2555.75	2380.25	2719.64	1864.04	2732.22	2253.23	1899.28	1582.92	2360.46	1595.11	1766.54	2532.89		101.234	100.56	100.816	101.569	100.937	102.277	99.6646	101.298	100.449	100.99	100.533	101.399	100.787	102.447	100.508	101.724	100.919	100.807	101.06		101.051	0.636435	17
18	2293.64	1923.9	2616.13	2384.25	2013.92	2402.37	2014.4	2562.89	2382.08	2712.09	1860.36	2727.39	2255.19	1895.87	1588.9	2352.54	1603.88	1763.42	2540.04		101.001	100.315	101.404	101.518	101.259	102.194	99.9408	101.581	100.527	100.71	100.335	101.219	100.874	102.263	100.888	101.382	101.473	100.629	101.345		101.098	0.594703	18
19	2287.63	1937.09	2594.92	2363.59	2005.4	2404.11	2013.79	2566.85	2385.29	2721.45	1880.37	2740.84	2260.24	1913.48	1592.55	2364.88	1589.98	1770.86	2561.42		100.736	101.003	100.582	100.638	100.831	102.268	99.9106	101.738	100.662	101.057	101.414	101.719	101.1	103.213	101.119	101.914	100.594	101.054	102.198		101.25	0.751199	19
20	2292.98	1952.35	2610.74	2380.57	2014.52	2401.36	2012.94	2566.14	2391.2	2737.16	1873.28	2739.59	2242.47	1914.92	1591.05	2368.57	1612.82	1768.55	2548.48		100.972	101.799	101.195	101.361	101.289	102.151	99.8683	101.71	100.912	101.641	101.032	101.672	100.305	103.291	101.024	102.073	102.039	100.922	101.681		101.418	0.725142	20
21	2313.44	1946.33	2607.18	2377.35	2011.64	2404.26	2006.92	2557.61	2402.23	2719.46	1881.09	2747.66	2252.38	1911.78	1587.94	2363.73	1601.8	1771.04	2544.35		101.873	101.485	101.057	101.224	101.145	102.274	99.5694	101.372	101.377	100.984	101.453	101.972	100.748	103.121	100.827	101.865	101.342	101.064	101.517		101.383	0.692868	21
22	2299.35	1947.16	2615.17	2374.06	1999.69	2424.69	2022.52	2567.34	2407.72	2723.42	1864.09	2748.53	2265.61	1909.34	1569.33	2366.59	1614.01	1777.14	2564.7		101.252	101.528	101.367	101.084	100.544	103.143	100.343	101.758	101.609	101.131	100.536	102.004	101.34	102.99	99.6451	101.988	102.114	101.412	102.329		101.48	0.845743	22
23	2314.34	1955.41	2614.38	2385.27	2021.26	2441.62	2046.03	2588.21	2431.52	2737.8	1874.56	2758.07	2257.85	1916.53	1576.28	2364.82	1604.8	1782.7	2557.86		101.912	101.958	101.336	101.561	101.628	103.864	101.51	102.585	102.613	101.665	101.101	102.358	100.993	103.378	100.086	101.912	101.531	101.729	102.056		101.883	0.823332	23
24																																											24
25	2333.05	1968.79	2641.74	2398.72	2035.68	2432.53	2043.67	2603.97	2443.76	2751.38	1881.56	2776.19	2275.95	1933.02	1586.93	2402.37	1614.02	1787.16	2578.63		102.736	102.656	102.397	102.134	102.354	103.477	101.393	103.21	103.13	102.169	101.478	103.031	101.803	104.267	100.763	103.53	102.115	101.984	102.885		102.5	0.827615	25
26																																											26
27																																											27
28																																											28
29	2388.51	2012.59	2682.15	2445.76		2489.94	2106.69		2494.38	2814.96		2831.54	2327.67	1952.48			1649.31	1853.21	2631.34		105.178	104.94	103.963	104.137		105.919	104.52		105.266	104.53		105.085	104.116	105.317			104.348	105.753	104.988		104.861	0.58766	29
30	2363.15	1988.71	2659.4	2422.25	2076.8	2478.47	2095.87	2636.37	2477.04	2786.86		2805.87	2311.93	1929.83		2437.2	1636.61	1830.69	2599.42		104.062	103.695	103.082	103.136	104.421	105.431	103.983	104.493	104.534	103.486		104.132	103.412	104.095		105.031	103.544	104.468	103.714		104.042	0.623923	30
31	2343.14	1987.09	2648.1	2427.06	2072.29	2483.5	2089.88	2644.71	2478.3	2774.82		2803.3	2306.35	1950.54	1590.77	2432.69	1615.97	1830.14	2633.08		103.18	103.611	102.643	103.341	104.194	105.645	103.686	104.824	104.587	103.039		104.037	103.163	105.212	101.006	104.836	102.239	104.436	105.057		103.819	1.14361	31
32	2341.02	1952.74	2626.1	2408.38	2033.35	2464.9	2090.22	2607.91	2452.07	2768.98	1889.39	2790.85	2261.92	1933.03	1590.1	2383.44	1628.43	1775.76			103.087	101.819	101.791	102.545	102.236	104.854	103.702	103.366	103.48	102.822	101.901	103.575	101.175	104.268	100.964	102.714	103.026	101.333			102.703	1.05084	32
33	2358.28	1984.05	2647.44	2433.06		2472.43	2079.05	2614.77	2434.22	2761.21	1898.95	2778.46	2280.41	1927.61	1581.89	2432.97	1631.74	1794.1	2593.21		103.847	103.452	102.618	103.596		105.174	103.148	103.637	102.727	102.534	102.416	103.115	102.002	103.976	100.443	104.849	103.236	102.379	103.466		103.145	1.03837	33
34	2348.52	1975.47	2650.16	2418.48	2051	2443.35	2080.53	2616.19	2439.4		1898.36	2765.92	2266.25	1919.15	1597.42	2410.54	1623.03	1790.27	2590.66		103.418	103.004	102.723	102.975	103.124	103.937	103.221	103.694	102.946	0	102.385	102.65	101.369	103.519	101.428	103.882	102.685	102.161	103.365			22.9913	34
35	2337.45	1987.47	2637.96	2424.78	2065.29	2493.36	2114.52	2634.11	2452.79	2775.19	1891.11	2789.79	2238.35	1944.27	1581.74	2440.48	1631.93	1823.86	2597.88		102.93	103.63	102.251	103.244	103.842	106.065	104.908	104.404	103.511	103.053	101.994	103.536	100.121	104.874	100.433	105.172	103.248	104.078	103.652		103.418	1.44614	35
36		1913.47	2608.64	2419.6	2075.28	2445.95		2611.44	2440.13	2761.29	1889.51	2729.51		1795.7	1590.54	2421.17	1620.24	1806.49	2580.11			99.7717	101.114	103.023	104.345	104.048		103.505	102.976	102.537	101.907	101.298		96.8601	100.992	104.34	102.508	103.087	102.944		102.203	1.8553	36
37																																											37
38		1960.43	2610.27		2062.55		2057.48		2413.66	2714.43	1875.41	2694.59	2246.42	1873.48	1603.41	2367.98	1599.39	1777.76	2535.59			102.22	101.177		103.705		102.078		101.859	100.797	101.147	100.002	100.482	101.056	101.809	102.048	101.19	101.447	101.168		101.479	0.842264	38
39	2345.91	1999.22	2666.33	2423.15	2089.24	2445.02	2091.86	2627.71	2458.13	2768.22	1909.92	2800.25	2313.14	1937.76	1596.47	2431.53	1641.38	1831.26	2599.87		103.302	104.243	103.35	103.174	105.046	104.008	103.784	104.15	103.736	102.794	103.008	103.924	103.466	104.523	101.368	104.786	103.846	104.5	103.732		103.723	0.805288	39
40	2367.5	1995.77	2676.37	2422.44	2087.56	2463.53	2091.1	2630.29	2456.16	2779.54	1906.11	2785.87	2318.51	1927.32	1598.38	2432.49	1630.75	1827.86	2599.97		104.253	104.063	103.739	103.144	104.962	104.796	103.746	104.252	103.653	103.215	102.803	103.39	103.706	103.96	101.49	104.828	103.173	104.306	103.736		103.748	0.788594	40
41	2368	1998.37	2670.81	2431.97	2067.28	2465.63	2086	2639.01	2454.15	2771.05	1900.31	2786.36	2284.89	1948.66	1604.86	2427.7	1635.48	1822.34	2610.1		104.275	104.198	103.524	103.55	103.942	104.885	103.493	104.598	103.568	102.899	102.49	103.408	102.203	105.111	101.901	104.621	103.472	103.991	104.14		103.698	0.852318	41
42	2357.35	1993.62	2660.35	2419.22	2075.09	2460.5	2077.84	2637.35	2449.39	2780.14	1909.86	2779.55	2311.15	1945.19	1610.02	2417.5	1643.73	1816.32	2610.42		103.806	103.951	103.118	103.007	104.335	104.667	103.088	104.532	103.367	103.237	103.005	103.155	103.377	104.924	102.229	104.182	103.994	103.648	104.153		103.672	0.675973	42
43	2347.26	1987.87	2662.89	2424.28	2067.9	2475.7	2086.03	2629.66	2455.13	2783.62	1914.03	2776.48	2304.2	1935.18	1602.47	2439.19	1649.91	1835.75	2618.27		103.362	103.651	103.217	103.222	103.974	105.313	103.495	104.228	103.609	103.366	103.23	103.042	103.067	104.383	101.749	105.117	104.386	104.756	104.466		103.77	0.830721	43
44	2356.79	1988.19	2666.54	2429.39	2077.8	2465.69	2073.04	2629.73	2463.81	2770.29	1910.74	2790.2	2307.05	1926.4	1610.61	2416.76	1645.48	1828.94	2615.56		103.782	103.668	103.358	103.44	104.471	104.887	102.85	104.23	103.976	102.871	103.052	103.551	103.194	103.91	102.266	104.15	104.105	104.368	104.358		103.71	0.649124	44
45	2359.07	1989.36	2666.32	2412.1	2071.54	2457.62	2090.59	2629.01	2458.6	2773.84	1907.26	2789.97	2313.44	1934.28	1612.78	2411.75	1644.65	1817.4	2602.49		103.882	103.729	103.35	102.704	104.156	104.544	103.721	104.202	103.756	103.003	102.865	103.542	103.48	104.335	102.404	103.934	104.053	103.709	103.836		103.642	0.552621	45
46	2351.51	1999.62	2667.25	2425.86	2070.77	2460.39	2082.65	2639.76	2458.02	2768.59	1914.13	2791.86	2315.12	1937.21	1614.95	2422.81	1650.39	1805.99	2606.38		103.549	104.264	103.386	103.29	104.118	104.662	103.327	104.628	103.732	102.808	103.235	103.612	103.555	104.493	102.542	104.411	104.416	103.058	103.992		103.741	0.615715	46
47	2346.04	1993.51	2668.83	2407.99	2073.67	2466.49	2090.8	2630.04	2454.82	2765.2	1912.76	2775.23	2314.16	1938.31	1629.08	2418.63	1644.46	1824.52	2599.44		103.308	103.945	103.447	102.529	104.264	104.922	103.731	104.243	103.597	102.682	103.161	102.995	103.512	104.552	103.439	104.23	104.041	104.116	103.715		103.707	0.606514	47
48	2367.44	2002.91	2662.7	2423.22	2077.49	2464.34	2076.49	2632.02	2447.05	2764.1	1927.2	2777.19	2301.07	1929.95	1635	2430.6	1648.44	1823.4	2605.47		104.251	104.435	103.209	103.177	104.456	104.83	103.021	104.321	103.269	102.641	103.94	103.068	102.926	104.102	103.815	104.746	104.293	104.052	103.955		103.816	0.647648	48
49	2359.07	1988.42	2668.2	2424.99	2070.99	2465.2	2078.83	2629.92	2452.84	2781.63	1906.41	2778.51	2333.49	1927.96	1621.5	2422.06	1639.86	1817.61	2598.85		103.882	103.68	103.423	103.253	104.129	104.867	103.137	104.238	103.513	103.292	102.819	103.117	104.377	103.995	102.957	104.378	103.75	103.721	103.692		103.696	0.530081	49
50	2364.36	1992.14	2656.21	2423.4	2062.25	2461.76	2084.88	2625.55	2459.22	2767.93	1913.66	2785.42	2311.69	1939.4	1611.01	2429.21	1643.66	1829.62	2606.96		104.115	103.874	102.958	103.185	103.689	104.72	103.437	104.065	103.782	102.783	103.21	103.373	103.401	104.612	102.291	104.686	103.99	104.407	104.015		103.715	0.649343	50
51	2357.99	2013.17	2666.22	2435	2083.95	2459.85	2077.39	2630.74	2464.56	2771.84	1924.49	2785.94	2317.96	1927.92	1620.64	2435.86	1628.93	1829.92	2604.53		103.835	104.97	103.346	103.679	104.78	104.639	103.066	104.27	104.008	102.929	103.794	103.392	103.682	103.992	102.903	104.973	103.058	104.424	103.918		103.877	0.651289	51
52	2358.28	1993.26	2666.58	2433.95	2065.22	2463.99	2085.76	2631.64	2475.53	2782.24	1922.09	2784.33	2315.38	1930.52	1608.66	2415.52	1613.01	1831.63	2600.91		103.847	103.932	103.36	103.634	103.839	104.815	103.481	104.306	104.47	103.315	103.665	103.333	103.566	104.132	102.142	104.096	102.051	104.521	103.773		103.699	0.685892	52
53	2371.44	1998.49	2666.02	2429.88	2080.31	2492.81	2116.15		2492.11	2798.18	1937.51	2804.23	2309.17	1951.78	1601.12	2436.01	1597.19	1831.41	2609.08		104.427	104.205	103.338	103.461	104.597	106.041	104.989		105.17	103.907	104.496	104.071	103.289	105.279	101.664	104.979	101.05	104.509	104.1		104.087	1.18973	53
54																																											54
55																																											55
56						2424.72	2058.56	2583.7	2397.3	2727.03	1853.06	2717.57		1871.26			1580.16	1797.98	2503.93							103.145	102.132	102.406	101.169	101.265	99.9412	100.855		100.936			99.9726	102.601	99.9041		101.302	1.08363	56
57	2341.48	1963.4	2641.65		2054.87	2421.74	2059.18	2613.68	2435.45	2745.82	1889.88	2750.09	2277.63	1930.75	1581.56	2381.9	1614.97	1799.9	2561.77		103.107	102.375	102.394		103.318	103.018	102.162	103.594	102.779	101.963	101.927	102.062	101.878	104.145	100.421	102.647	102.175	102.711	102.212		102.494	0.788814	57
58	2330.29	1968.5	2630.11	2405.1	2050.5	2433.05	2072.76	2622.86	2430.5	2753.27	1896.99	2764.06	2303.51	1906.44	1583.84	2405.2	1582.69	1803.38	2574.44		102.615	102.641	101.946	102.406	103.098	103.499	102.836	103.958	102.57	102.239	102.311	102.58	103.036	102.834	100.566	103.652	100.133	102.909	102.717		102.555	0.896871	58
59	2318.27	1977.16		2405.6	2068.92	2443.7	2058.55	2605.72	2435.47	2740.94	1893.24	2756.11	2314.98	1900.92	1588.21	2406.43	1610.01	1790.88	2527.19		102.085	103.093	0	102.427	104.025	103.952	102.131	103.279	102.78	101.781	102.108	102.285	103.548	102.536	100.844	103.705	101.861	102.196	100.832			22.9111	59
60	2328.16	1944.06	2651.58	2399.14	2074	2443.64	2066.82	2621.3	2438.37	2756.65	1898.29	2770.47	2296.61	1923.76	1591.18	2404.92	1622.58	1799.87	2561.79		102.521	101.367	102.779	102.152	104.28	103.95	102.541	103.896	102.902	102.365	102.381	102.818	102.727	103.768	101.032	103.64	102.657	102.709	102.213		102.774	0.822138	60
61	2328.53	1954.8	2639.65	2413.75	2059.92	2470.45	2061.09	2619.18	2437.49	2754.68	1898.59	2749.63	2301.24	1904.36	1584.49	2402.09	1630.5	1858.39	2574.3		102.537	101.927	102.316	102.774	103.572	105.09	102.257	103.812	102.865	102.291	102.397	102.045	102.934	102.721	100.607	103.518	103.158	106.048	102.712		102.925	1.14613	61
62	2340.44	1970.77	2652.96	2405.97	2068.33	2448.82	2069.8	2605.17	2430.41	2750.88	1894.62	2758.52	2306.2	1898.64	1599.13		1623.24	1793.77	2576.65		103.061	102.76	102.832	102.443	103.995	104.17	102.689	103.257	102.566	102.15	102.183	102.375	103.156	102.413	101.537		102.698	102.361	102.806		102.747	0.614078	62
63	2326.74	1952.04	2657.65	2384.36	2067.21	2460.95	2063.41	2617.09	2438	2758.63	1907.96	2763.8	2293.52	1910.93	1606.25	2423.44	1575.75	1809.09	2587.14		102.458	101.783	103.014	101.522	103.939	104.686	102.372	103.729	102.886	102.438	102.903	102.571	102.589	103.076	101.989	104.438	99.6936	103.235	103.224		102.766	1.0855	63
64	2336.44	1966.5	2662.25	2396.03	2080.7	2452.83		2622.64	2451.69	2768.86	1899.3	2760.61	2304.8	1905.2	1597.42	2386.73	1603.01	1810.25	2584.25		102.885	102.537	103.192	102.02	104.617	104.34		103.949	103.464	102.818	102.435	102.452	103.093	102.767	101.429	102.856	101.418	103.301	103.109		102.927	0.832208	64
65	2330.79	1967.23	2655.24	2404.15	2088.24		2073.75	2633.37	2491.51	2756.26	1904.45	2769.66	2303.91	1915.85	1601.63	2406.27	1598.27	1811.07	2577.33		102.637	102.575	102.92	102.365	104.996		102.885	104.375	105.145	102.35	102.713	102.788	103.053	103.341	101.696	103.698	101.118	103.348	102.833		103.046	0.992105	65
66	2338.25	1976.87	2649.27	2410.76	2049.41	2463.5	2085.6	2641.72	2444.37	2769.11	1909.95	2790.84	2330.79	1917.44	1585.11	2404.12	1598.99	1816.23	2678.86		102.965	103.078	102.689	102.647	103.044	104.795	103.473	104.705	103.156	102.827	103.01	103.574	104.256	103.427	100.647	103.605	101.164	103.642	106.884		103.347	1.28173	66
67	2331.03	1977.34	2655.97	2411.1	2059.77	2469	2121.49	2637.51	2417.13	2758.4	1912.77	2772.19	2297.35	1900.71	1587.78	2405.59		1803.56	2597.81		102.647	103.102	102.949	102.661	103.565	105.028	105.254	104.539	102.006	102.429	103.162	102.882	102.76	102.524	100.816	103.669		102.919	103.65		103.142	1.02876	67
68	2328.09	1973.49	2636.4	2401.79	2053.99	2449.61	2070.79	2626.68	2425.73	2759.98	1911.72	2807.77	2291.99	1921.3	1621.66	2412.14	1606.03	1800.93	2584.48		102.518	102.901	102.19	102.265	103.274	104.203	102.738	104.109	102.369	102.488	103.105	104.203	102.52	103.635	102.968	103.951	101.609	102.769	103.118		102.997	0.722551	68
69	2329.02	1973.97	2649.45	2410.28	2037.66		2080.68	2624.77	2444.97	2770.47	1914.12	2782.66	2323.49	1862.02		2411.08	1619.82	1807.6	2613.39		102.559	102.926	102.696	102.626	102.453		103.229	104.034	103.181	102.878	103.235	103.271	103.929	100.437		103.905	102.482	103.15	104.271		103.015	0.846533	69
70	2336.66	1981.75	2650.92	2400.8		2436.48		2641.69	2453.62	2761.05	1916.77	2771.05	2298.75	1937.19	1601.82	2410.02	1610.02	1807.31	2574.61		102.895	103.332	102.753	102.222		103.645		104.704	103.546	102.528	103.378	102.84	102.823	104.492	101.708	103.859	101.862	103.134	102.724		103.085	0.794425	70
71	2348.85	1978.28	2650.1	2408.65	2051.37	2440.37	2074.78	2623	2455.72	2773.1	1927.9	2769.21	2308.58	1912.89	1592.71	2408.6	1612.79	1804.81	2625.13		103.432	103.151	102.721	102.557	103.142	103.81	102.936	103.964	103.634	102.976	103.978	102.772	103.262	103.181	101.129	103.798	102.037	102.991	104.74		103.169	0.7662	71
72	2349.21		2654.01	2396		2463	2076.57	2626.67	2435.13	2764.9	1919.65	2718.62	2317.44	1922.85	1587.97	2408.42	1626.45	1803.9	2606.89		103.448		102.873	102.018		104.773	103.025	104.109	102.766	102.671	103.533	100.894	103.659	103.719	100.828	103.79	102.901	102.939	104.012		103.056	1.02077	72
73	2338.78		2665.87			2478.3	2071.92	2623.23	2442.96	2764.56	1898.72	2781.98	2315.82	1885.36	1597.57	2412.88	1619.24	1810.41	2731.04		102.989		103.332			105.424	102.794	103.973	103.096	102.658	102.404	103.246	103.586	101.697	101.438	103.983	102.445	103.311	108.966		103.459	1.68805	73
74		1986.59	2662.1	2408.66	2054.04	2466.45	2088.77	2620.73	2441.34	2754.52	1900.03	2790.56	2319.23	1925.87	1583.59		1596.11	1809.02	2610.47			103.584	103.186	102.557	103.277	104.92	103.63	103.874	103.028	102.286	102.474	103.564	103.739	103.881	100.55		100.982	103.231	104.155		103.113	1.06185	74
75	2343.57	1985.82	2672.84	2394.52	2072.92	2518.08	2134.08	2641.54	2462.48	2774.25	1925.6	2797.68	2336.13	1919.23	1583.32		1590.29		2616.28		103.199	103.544	103.602	101.955	104.226	107.116	105.878	104.698	103.92	103.018	103.854	103.828	104.495	103.524	100.533		100.613		104.387		103.67	1.57641	75
76	2393.42	1963.55	2672.39	2389.47	2088.27	2483.28		2635.1	2449.36	2775.15	1927.55	2797.86		1935.47	1601.72	2418.47	1589.88	1829.01	2626.14		105.395	102.383	103.585	101.74	104.998	105.636		104.443	103.366	103.052	103.959	103.835		104.399	101.701	104.223	100.588	104.371	104.78		103.674	1.35277	76
77	2352.15	1964.57	2669.55	2408.19	2105.09	2499.12	2099.1	2648.79	2472.09	2790.21	1935.65	2806.58	2342.24	1932.61	1614.38	2420.78	1586.35	1840.12	2630.86		103.577	102.436	103.475	102.537	105.843	106.31	104.143	104.986	104.325	103.611	104.396	104.159	104.768	104.245	102.506	104.323	100.364	105.006	104.968		103.999	1.32507	77
78	2373.68	1978.1	2718.5	2409.07	2121.12	2521.99	2100.03	2651.63	2461.16	2782.42	1950.44	2832.07	2321.52	1879.21	1592.5	2407.86	1565.82	1935.65	2628.2		104.525	103.142	105.372	102.575	106.65	107.282	104.189	105.098	103.864	103.321	105.194	105.105	103.841	101.365	101.116	103.766	99.0652	110.457	104.862		104.252	2.38432	78
79	2368.39	1982.79	2717.71	2428.24	2136.32	2556.7	2137.07	2674.7	2486.18	2805.35	1946.37	2815.34	2355.66		1609.45	2399.96	1578.67	1838.8	2647.24		104.292	103.386	105.342	103.391	107.414	108.759	106.027	106.013	104.92	104.173	104.974	104.484	105.368		102.192	103.426	99.8784	104.931	105.622		104.7	1.88997	79
80	2401.5	1990.01	2734.18	2441.02	2149.79	2562.31	2156.61	2714.19	2514.85	2825.01	1965.67	2830.76	2383.24	1950.77	1611.82	2414.18	1581.72	1841.26	2662.42		105.751	103.763	105.98	103.935	108.091	108.998	106.996	107.578	106.13	104.903	106.015	105.056	106.602	105.225	102.343	104.039	100.071	105.071	106.228		105.409	1.99868	80
81	2397.71	2017.8	2748.4	2493.4	2160.73	2614.39	2194.64	2731.05	2540.62	2857.05	1992.45	2840.88	2409.51	1960	1638.09	2426.19	1598.08	1838.75	2694.22		105.583	105.212	106.531	106.165	108.641	111.213	108.883	108.246	107.217	106.093	107.459	105.431	107.777	105.723	104.011	104.556	101.106	104.927	107.497		106.435	2.12219	81
82	2412.43	2006.18	2763.95	2518.33	2175.12	2650.65	2233.27	2768.76	2578.26	2894.33	2006.73	2865.07	2448.03	1981.79	1648.83	2433.68	1619.32	1852.37	2731.7		106.232	104.606	107.134	107.227	109.364	112.756	110.8	109.741	108.806	107.477	108.229	106.329	109.5	106.898	104.693	104.879	102.45	105.705	108.992		107.464	2.41536	82
83	2451.99	2030.76	2771.36	2557.86	2189.7	2675.96	2269.07	2794.81	2610.66	2931.12	2013.22	2898.14	2490.41	2010.1	1677.01	2472.16	1639.38	1867.75	2756.73		107.974	105.888	107.421	108.91	110.097	113.832	112.575	110.773	110.173	108.843	108.579	107.557	111.396	108.425	106.482	106.537	103.719	106.582	109.991		108.724	2.39651	83
84	2467.41	2053.03	2786.58	2601.94	2197.31	2718.92	2324.32	2830.31	2645.92	2966.81	2037.47	2935.96	2522.26	2036.95	1674.66	2492.46	1674.74	1898.3	2804.93		108.653	107.048	108.011	110.787	110.48	115.66	115.317	112.18	111.661	110.169	109.887	108.96	112.82	109.873	106.333	107.412	105.956	108.326	111.914		110.076	2.6664	84
85	2488.97	2071.96	2801.39	2635.16	2232.75	2756.57	2356.83	2873.25	2678.11	3016.21	2054.21	2967.56	2565.75	2072.47	1716.1	2548.99	1698.91	1914.06	2838.59		109.602	108.036	108.585	112.201	112.262	117.261	116.93	113.882	113.019	112.003	110.79	110.133	114.765	111.789	108.964	109.849	107.486	109.225	113.257		111.581	2.73966	85
86	2505.52	2077.03	2824.89	2672.94	2230.94	2794.33	2403.82	2907.8	2736.92	3057.13	2066.62	3017.43	2584.6	2111.71	1735.68	2590.97	1729.83	1936.47	2886.1		110.331	108.3	109.496	113.81	112.171	118.867	119.261	115.252	115.502	113.522	111.459	111.984	115.608	113.906	110.207	111.658	109.442	110.504	115.152		112.97	3.01053	86
87	2539.57	2102.11	2827.14	2720.14	2261.63	2846.95	2431.94	2939.18	2752.61	3126.03	2089.9	3053.16	2651.7	2142.1	1746.4	2617.12	1773.7	1939.11	2933.42		111.83	109.608	109.583	115.82	113.714	121.106	120.656	116.496	116.163	116.081	112.715	113.309	118.61	115.545	110.888	112.784	112.218	110.655	117.04		114.464	3.35119	87
88	2542.38	2124.65	2849.99	2743.28	2295.13	2879.66	2472.21	2982.23	2790.03	3149.3	2095.35	3093.86	2689.23	2174.98	1765.23	2669.39	1785.3	1981.23	2957.36		111.954	110.783	110.469	116.805	115.399	122.498	122.654	118.202	117.743	116.945	113.009	114.82	120.289	117.319	112.083	115.037	112.951	113.058	117.995		115.79	3.54146	88
89	2574.35	2137.04	2870.6	2765.95	2306.92	2903.74	2500.06	2994.79	2825.56	3185.51	2115	3118.18	2723.72	2189.29	1801.32	2717.54	1803.21	2008.06	3008.59		113.362	111.429	111.268	117.77	115.991	123.522	124.036	118.7	119.242	118.29	114.069	115.723	121.831	118.09	114.375	117.112	114.084	114.589	120.04		117.028	3.59494	89
90	2596.09	2158.56	2895.62	2804.25	2331.34	2945.85	2526.13	3032.5	2851.69	3231.77	2142.3	3164.07	2769.67	2241.66	1821.69	2758.28	1826.84	2008.94	3036.48		114.319	112.551	112.238	119.401	117.219	125.313	125.329	120.194	120.345	120.008	115.541	117.426	123.887	120.915	115.668	118.867	115.58	114.639	121.152		118.452	3.83523	90
91	2603.78	2178.28	2922.44	2835.9	2344.07	2960.96	2554.6	3075.96	2864.73	3264.72	2157.71	3216.7	2806.47	2263.53	1839.91	2804.82	1860.33	2032.76	3057.06		114.658	113.579	113.277	120.748	117.859	125.956	126.742	121.917	120.895	121.231	116.372	119.379	125.533	122.095	116.826	120.873	117.698	115.999	121.974		119.664	3.90314	91
92	2621.69	2186.07	2935.63	2861.22	2360.67	2996.21	2588.32	3084.92	2912.35	3299.74	2182.68	3234.54	2829.16	2295.57	1854.61	2831.05	1872.3	2061.49	3107.68		115.447	113.985	113.788	121.826	118.694	127.455	128.415	122.272	122.905	122.531	117.719	120.041	126.548	123.823	117.759	122.004	118.456	117.638	123.993		120.805	4.16907	92
93	2642.91	2202.61	2945.7	2870.78	2387.27	3033.64	2605.08	3122.91	2942.93	3339.65	2214.84	3278.86	2862.49	2318.46	1889.21	2865.29	1876.45	2080.02	3118.23		116.381	114.848	114.179	122.234	120.031	129.048	129.246	123.778	124.195	124.013	119.453	121.686	128.039	125.058	119.956	123.479	118.718	118.696	124.414		121.971	4.28159	93
94	2675.03	2206.17	2966.53	2896.26	2398.9	3056.92	2610.94	3156.79	2973.02	3361.7	2227.42	3316.65	2904.39	2331.44	1905.53	2892.62	1913.03	2095.67	3144.9		117.796	115.034	114.986	123.318	120.616	130.038	129.537	125.12	125.465	124.832	120.132	123.088	129.913	125.758	120.992	124.657	121.033	119.589	125.478		123.02	4.34554	94
95	2684.23	2217.8	2982.57	2917.83	2434.06	3092.38	2645.74	3168.76	2982.91	3379.82	2237.02	3330.52	2928.31	2359.74	1901.27	2932.47	1920.42	2117.09	3169.88		118.2	115.64	115.608	124.237	122.384	131.546	131.263	125.595	125.883	125.505	120.65	123.603	130.983	127.284	120.722	126.374	121.5	120.811	126.475		123.909	4.61327	95
96	2708.79	2231.95	3004.06	2946.06	2443.41	3095.65	2659.99	3197.25	2999.8	3435	2260.88	3373.82	2960.24	2366.26	1927.89	2960.83	1934.58	2129.42	3203.19		119.282	116.378	116.441	125.439	122.854	131.686	131.97	126.724	126.595	127.554	121.937	125.21	132.411	127.636	122.412	127.596	122.396	121.515	127.804		124.939	4.59905	96
97	2717.51	2246.86	3021.51	2952.93	2471.58	3130.53	2683.09	3213.72	3035.78	3458.8	2271.47	3395.88	2979.54	2408.47	1946.79	2981.05	1954.74	2157.37	3227.29		119.666	117.155	117.117	125.731	124.271	133.169	133.116	127.377	128.114	128.438	122.508	126.029	133.274	129.913	123.612	128.468	123.672	123.109	128.765		125.974	4.74781	97
98	2657.02	2278.59	3058.24	2969.68	2478.78	3133.8	2719.39	3246.3	3046.36	3481.38	2295.25	3415.37	3019.83	2414.02	1961.83	2993.65	1966.91	2150.1	3231.41		117.002	118.809	118.541	126.445	124.633	133.308	134.917	128.669	128.56	129.276	123.79	126.752	135.077	130.212	124.566	129.011	124.442	122.694	128.93		126.612	5.02212	98
99	2756.88	2266.66	3057.03	2991.82	2503.36	3162.38	2716.32	3265.47	3070.58	3503.73	2292.41	3440.27	3032.07	2434.48	1961.88	3021.6	1976.13	2177.18	3245.43		121.4	118.188	118.494	127.388	125.868	134.524	134.765	129.428	129.582	130.107	123.637	127.676	135.624	131.316	124.57	130.215	125.025	124.24	129.489		127.449	4.90336	99
100	2754.77	2284.37	3077.33	3003.74	2490.29	3185.48	2743.5	3290.98	3102.87	3525.66	2321.54	3459.53	3054.08	2445.13	1990.87	3043.97	1999.29	2189.33	3286.32		121.307	119.111	119.281	127.895	125.211	135.507	136.113	130.439	130.945	130.921	125.208	128.391	136.608	131.891	126.411	131.18	126.49	124.933	131.12		128.366	5.03487	100
101	2798.24	2301.91	3079.45	3019.09	2528.32	3202.58	2749.45	3285.76	3115.84	3548.24	2319.66	3493.09	3076.39	2480.24	2010.73	3051.33	2010.69	2196.77	3294.34		123.221	120.026	119.363	128.549	127.123	136.234	136.409	130.233	131.492	131.759	125.107	129.636	137.606	133.784	127.672	131.497	127.211	125.358	131.441		129.143	5.00333	101
102	2787.07	2312.78	3100.03	3031.82	2537.11	3216.56	2766.16	3313.96	3131.37	3560.17	2340.23	3520.56	3103.86	2491.42	2003.81	3077.15	2021.43	2226.57	3327.77		122.729	120.593	120.161	129.091	127.565	136.829	137.238	131.35	132.148	132.202	126.216	130.656	138.835	134.387	127.232	132.61	127.891	127.058	132.774		129.872	5.1414	102
103	2812.34	2327.07	3112.81	3057.88	2551.76	3231.74	2786.49	3337.72	3152.51	3577.64	2338.22	3538.91	3127.85	2514.49	2018.71	3063.9	2020.44	2232.8	3341.49		123.842	121.338	120.656	130.2	128.302	137.474	138.247	132.292	133.04	132.851	126.107	131.337	139.908	135.632	128.178	132.038	127.828	127.414	133.322		130.527	5.23726	103
104	2818.45	2325.89	3134.63	3066.14	2561.62	3248.76	2782.91	3352.6	3158.37	3593.03	2358.48	3553.84	3129.6	2523.82	2031.18	3108.47	2031.91	2240.59	3348.72		124.111	121.276	121.502	130.552	128.797	138.199	138.069	132.882	133.287	133.423	127.2	131.891	139.986	136.135	128.97	133.959	128.554	127.858	133.611		131.066	5.18868	104
105	2836.05	2330.08	3143.05	3077.83	2562.89	3277.88	2807.4	3367.35	3171.43	3610.82	2385.62	3573.81	3158.81	2536.14	2035.36	3135.11	2048.42	2250.7	3358.55		124.886	121.494	121.828	131.05	128.861	139.437	139.284	133.466	133.838	134.083	128.664	132.632	141.293	136.8	129.236	135.107	129.598	128.435	134.002		131.789	5.39637	105
106	2842.76	2352.93	3163.43	3098.68	2580.33	3272.66	2809.71	3377.24	3192.38	3640.61	2399.84	3586.8	3168.74	2552.54	2056.38	3131.37	2050.04	2264.31	3393.75		125.181	122.686	122.618	131.937	129.738	139.215	139.398	133.858	134.722	135.189	129.431	133.114	141.737	137.684	130.57	134.946	129.701	129.212	135.407		132.439	5.23597	106
107	2868.18	2355.71	3159.52	3117.41	2589.79	3293.2	2824.15	3389.57	3201.95	3647.28	2402.47	3603.71	3194	2572.98	2069.72	3154.18	2078.44	2282.25	3398		126.301	122.831	122.467	132.735	130.214	140.089	140.115	134.347	135.126	135.437	129.573	133.742	142.867	138.787	131.417	135.929	131.498	130.236	135.576		133.12	5.38373	107
108	2874.36	2377.32	3184.25	3118.07	2604.53	3288.8	2828.72	3406.81	3208.42	3643.6	2418.99	3622.8	3207.97	2554.8	2082.54	3181.14	2081.39	2291.19	3411.14		126.573	123.958	123.426	132.763	130.955	139.902	140.342	135.03	135.399	135.3	130.464	134.45	143.492	137.806	132.231	137.091	131.685	130.746	136.101		133.564	5.15604	108
109	2883.19	2391.32	3180.58	3112.48	2623.33	3312.61	2844.76	3415.37	3218.66	3664.16	2430.33	3646.05	3227.94	2593.28	2097.76	3187.12	2082.7	2296.22	3431.98		126.962	124.688	123.283	132.525	131.9	140.915	141.137	135.37	135.832	136.064	131.075	135.313	144.385	139.882	133.197	137.349	131.767	131.033	136.932		134.19	5.39114	109
110	2897.54	2385.56	3138.94	3146.27	2630.95	3325.19	2844.13	3438.81	3228.62	3679.88	2434.79	3654.32	3223.96	2589.58	2115.07	3203.28	2102.4	2299.76	3444.08		127.594	124.387	121.669	133.963	132.284	141.45	141.106	136.299	136.252	136.648	131.316	135.62	144.207	139.682	134.297	138.045	133.013	131.235	137.415		134.552	5.56801	110
111	2922.56	2405.85	3236.98	3143.12	2658.61	3345.81	2853.52	3460.09	3256.43	3702.04	2459.37	3681.4	3248.56	2600.88	2138.65	3228.79	2113.17	2318.7	3468.59		128.695	125.445	125.469	133.83	133.674	142.327	141.572	137.142	137.425	137.471	132.641	136.625	145.307	140.291	135.794	139.144	133.695	132.316	138.393		135.645	5.1871	111
112	2944.98	2426.11	3241.37	3151.5	2659.97	3374.14	2876.73	3465.86	3272.47	3716.91	2480.36	3689.51	3261.68	2625.99	2133.92	3243.12	2141.88	2332.59	3471.03		129.683	126.502	125.639	134.186	133.743	143.532	142.724	137.371	138.102	138.023	133.774	136.926	145.894	141.646	135.493	139.762	135.512	133.109	138.491		136.322	5.23661	112
113	2947	2420.15	3266.18	3160.96	2676.92	3368.08	2873.58	3478.04	3270.66	3709.8	2472.44	3704.18	3269.83	2624.67	2142.3	3241.3	2146.17	2354.62	3482.2		129.772	126.191	126.601	134.589	134.595	143.274	142.567	137.853	138.026	137.758	133.346	137.47	146.259	141.575	136.025	139.683	135.783	134.365	138.936		136.562	5.12183	113
114	2966.26	2430.09	3279.17	3172.89	2681.21	3377.77	2883.55	3498.93	3307.52	3718.39	2492.68	3719.88	3290.15	2635.41	2161.02	3257.13	2158.02	2339.21	3501.41		130.62	126.709	127.105	135.097	134.811	143.686	143.062	138.682	139.581	138.078	134.438	138.053	147.168	142.154	137.214	140.366	136.532	133.486	139.703		137.187	5.1974	114
115	2974.71	2440.2	3296.4	3157.27	2690.35	3376.32	2881.16	3494.52	3302.12	3728.46	2496.86	3725.43	3301.38	2638.35	2176.46	3266.5	2144.51	2359.14	3508.13		130.992	127.236	127.772	134.432	135.27	143.625	142.944	138.507	139.353	138.451	134.664	138.259	147.67	142.313	138.195	140.769	135.678	134.623	139.971		137.406	5.09452	115
116	2990.38	2439.47	3281.41	3181.96	2681.5	3385.86	2892.84	3510.97	3302.89	3742.67	2495.32	3750.66	3305.71	2648.08	2170.61	3259.19	2159.83	2352.53	3532.78		131.682	127.198	127.191	135.483	134.825	144.03	143.523	139.159	139.386	138.979	134.581	139.195	147.864	142.838	137.823	140.455	136.647	134.246	140.954		137.687	5.24949	116
117	2999.09	2461.83	3301.43	3184.49	2693.5	3386	2881.39	3521.11	3312.84	3741.5	2520.78	3763.83	3307.46	2645.05	2178.38	3264.33	2162.48	2377.34	3531.33		132.065	128.364	127.967	135.591	135.428	144.037	142.955	139.561	139.806	138.936	135.954	139.684	147.942	142.674	138.316	140.676	136.815	135.662	140.896		138.07	4.91422	117
118	3005.74	2453.28	3307.31	3192.16	2710.79	3390.32	2894.28	3521.01	3329.1	3754.52	2526.55	3760.2	3323	2672.58	2163.33	3292.37	2190.16	2369.28	3537.87		132.358	127.919	128.195	135.918	136.298	144.22	143.594	139.557	140.492	139.419	136.265	139.549	148.637	144.159	137.361	141.884	138.566	135.202	141.157		138.461	5.14804	118
119	3005.94	2471.53	3333.52	3189.33	2712.22	3403.9	2893.29	3546.73	3337.58	3770.44	2530.47	3774.12	3317.62	2670.26	2178.3	3289.46	2187.45	2380.93	3540.86		132.367	128.87	129.211	135.797	136.369	144.798	143.545	140.576	140.85	140.01	136.476	140.066	148.397	144.034	138.312	141.759	138.395	135.867	141.277		138.788	4.94471	119
120	3020.39	2480.23	3335.51	3212.21	2722.85	3415.39	2899.6	3534.49	3341.5	3763.82	2530.07	3772.28	3317.98	2678.37	2183.35	3281.87	2202.2	2387.13	3552.07		133.004	129.324	129.288	136.771	136.904	145.287	143.858	140.091	141.015	139.764	136.455	139.998	148.413	144.472	138.632	141.432	139.327	136.221	141.724		139.051	4.86385	120
121	3025.66	2492.93	3353.34	3200.76	2729.74	3406.74	2916.12	3562.25	3343.75	3772.79	2533.32	3785.7	3342.2	2677.07	2195.56	3287.39	2194.4	2394.39	3553.11		133.236	129.986	129.979	136.284	137.251	144.919	144.678	141.191	141.11	140.097	136.63	140.496	149.496	144.401	139.408	141.67	138.834	136.635	141.765		139.372	4.86207	121
122	3028.84	2494	3356.78	3195.8	2731.96	3415.82	2907.51	3546.06	3346.75	3788.09	2544.55	3790.38	3343.12	2671.45	2193.49	3301.89	2208.95	2403.83	3564.88		133.375	130.041	130.113	136.072	137.362	145.305	144.251	140.549	141.237	140.666	137.236	140.669	149.537	144.098	139.276	142.294	139.755	137.174	142.235		139.539	4.825	122
123	3042.49	2487.58	3362.36	3212.12	2740.42	3402.42	2915.82	3558.62	3352.04	3786	2552.18	3799.92	3332.71	2689.32	2197.69	3311.41	2218.05	2402.06	3564.71		133.976	129.707	130.329	136.767	137.787	144.735	144.663	141.047	141.46	140.588	137.647	141.024	149.072	145.062	139.543	142.705	140.33	137.073	142.228		139.776	4.77691	123
124	3055.63	2497.53	3366.83	3210.17	2735.21	3422.7	2910.35	3569.57	3355.41	3787.94	2545.08	3811.73	3345.94	2687.5	2216.03	3305.37	2192.09	2416.18	3584.47		134.555	130.226	130.503	136.685	137.526	145.598	144.392	141.481	141.602	140.66	137.264	141.462	149.663	144.964	140.707	142.444	138.688	137.878	143.017		139.964	4.7998	124
125	3059.47	2509.19	3378.33	3219.63	2729.23	3432.09	2917.48	3568.64	3354.15	3788.07	2552.95	3810.1	3341.09	2685.69	2226.77	3350.52	2217.18	2406.09	3587.48		134.724	130.833	130.948	137.087	137.225	145.997	144.745	141.444	141.549	140.665	137.689	141.401	149.446	144.866	141.389	144.39	140.276	137.303	143.137		140.269	4.76077	125
126	3058.41	2507.64	3380.59	3215.79	2747.27	3445.91	2915.71	3578.62	3360.04	3793.26	2566.32	3822.83	3345.59	2704.52	2232.36	3355.18	2213.93	2432	3591.04		134.678	130.753	131.036	136.924	138.132	146.585	144.657	141.84	141.798	140.858	138.41	141.874	149.647	145.882	141.744	144.591	140.07	138.781	143.279		140.607	4.82659	126
127	3068.36	2516.99	3400.6	3215.32	2750.99	3441.07	2914.41	3579.62	3356.13	3789.36	2566.84	3824.93	3353.4	2692.38	2225.19	3317.55	2222.36	2431.81	3602.13		135.116	131.24	131.811	136.904	138.319	146.379	144.593	141.88	141.633	140.713	138.438	141.952	149.997	145.227	141.289	142.969	140.603	138.77	143.721		140.608	4.5954	127
128	3081.77	2519.91	3383.02	3207.21	2760.45	3442.59	2905.71	3590.58	3356.94	3802.59	2581.59	3833.25	3350.21	2706.08	2226.99	3325.09	2229.48	2430.54	3605.99		135.706	131.392	131.13	136.559	138.794	146.444	144.161	142.314	141.667	141.204	139.234	142.261	149.854	145.966	141.403	143.294	141.053	138.698	143.875		140.79	4.6459	128
129	3075.56	2522.63	3401.04	3219.52	2766.55	3447.16	2895.46	3577.23	3366.54	3812.05	2583.47	3833.05	3359.75	2701.96	2218.61	3327.28	2219.36	2419.75	3601.99		135.433	131.534	131.828	137.082	139.101	146.638	143.653	141.785	142.072	141.555	139.335	142.253	150.281	145.744	140.871	143.389	140.413	138.082	143.716		140.777	4.58006	129
130	3091.19	2524.84	3404.61	3206.86	2748.56	3434.62	2905.69	3593.45	3362.5	3805.67	2600.58	3831.96	3361.9	2708.1	2227.48	3335.52	2240.08	2450.23	3615		136.121	131.649	131.967	136.543	138.197	146.105	144.16	142.428	141.902	141.319	140.257	142.213	150.377	146.075	141.434	143.744	141.724	139.821	144.235		141.067	4.56108	130
131	3089.58	2530.01	3421.03	3211.77	2759.12	3442.23	2915.33	3590.29	3368.47	3804.97	2591.07	3827.67	3357.31	2702.8	2229.82	3325.06	2242.41	2453.59	3620.51		136.05	131.919	132.603	136.753	138.728	146.429	144.638	142.303	142.153	141.293	139.745	142.053	150.172	145.789	141.582	143.293	141.871	140.013	144.455		141.15	4.44306	131
132	3078.17	2546.59	3429.27	3217.04	2760.83	3444.2	2903.75	3595.99	3365	3796.63	2581.98	3835.64	3362.55	2703.68	2231.02	3332.32	2241.51	2442.64	3623.88		135.548	132.784	132.923	136.977	138.814	146.512	144.064	142.529	142.007	140.983	139.254	142.349	150.406	145.836	141.659	143.606	141.815	139.388	144.589		141.16	4.39007	132
133	3097.44	2539.31	3430.69	3229.74	2759.01	3440.82	2900.79	3606.69	3369.54	3803.7	2603.58	3831.19	3369.05	2707.46	2217.39	3314.82	2236.55	2441.69	3627.58		136.396	132.404	132.978	137.518	138.722	146.369	143.917	142.953	142.199	141.246	140.419	142.184	150.697	146.041	140.794	142.852	141.501	139.334	144.737		141.224	4.35332	133
134	3106.12	2546.08	3437.79	3214.29	2783.38	3452.34	2915.97	3591.42	3375.06	3819.1	2593.72	3838.53	3365.16	2716.67	2209.67	3334.81	2239.39	2450.38	3626.23		136.779	132.757	133.253	136.86	139.947	146.858	144.67	142.347	142.432	141.817	139.888	142.456	150.523	146.537	140.303	143.713	141.681	139.83	144.683		141.439	4.35677	134
135	3109.61	2551.85	3450.59	3218.16	2779.22	3454.02	2904.59	3602.2	3381.19	3802.34	2609.19	3844.73	3362.89	2714.68	2236.88	3332.96	2250.97	2447.32	3626.29		136.932	133.058	133.749	137.025	139.738	146.93	144.106	142.775	142.69	141.195	140.722	142.687	150.421	146.43	142.031	143.633	142.413	139.655	144.685		141.625	4.22758	135
136	3119.6	2556.91	3454.07	3216.7	2774.14	3456.57	2899.69	3610.12	3367.34	3808.48	2612.9	3841.48	3361.71	2716.04	2231.67	3337.08	2260.4	2456.77	3628.96		137.372	133.322	133.884	136.962	139.483	147.038	143.862	143.088	142.106	141.423	140.922	142.566	150.369	146.504	141.7	143.811	143.01	140.195	144.792		141.706	4.16936	136
137	3129.19	2569.49	3451.81	3212.26	2784.02	3458.92	2912.4	3609.74	3373.57	3805.77	2614.8	3832.64	3376.25	2718.16	2241.34	3332.42	2251.04	2463.21	3637.87		137.794	133.978	133.796	136.773	139.98	147.138	144.493	143.074	142.369	141.322	141.025	142.238	151.019	146.618	142.314	143.61	142.417	140.562	145.147		141.877	4.18853	137
138	3126.09	2572.79	3449.92	3228.05	2780.33	3456.12	2907.75	3612.06	3361.18	3818.03	2615.34	3860.83	3354.44	2717.37	2234.57	3335.25	2265.79	2456.34	3626.65		137.658	134.15	133.723	137.445	139.794	147.019	144.262	143.166	141.846	141.777	141.053	143.284	150.043	146.575	141.884	143.732	143.351	140.17	144.699		141.875	4.03729	138
139	3122.82	2568.15	3462.07	3212.55	2790.81	3457.12	2910.89	3609.92	3366.28	3824.28	2624.98	3857.04	3367.08	2727.85	2224.44	3340.27	2258.71	2471.08	3637.05		137.514	133.908	134.194	136.786	140.321	147.062	144.418	143.08	142.061	142.01	141.574	143.143	150.609	147.14	141.241	143.949	142.903	141.011	145.114		142.002	4.14906	139
140	3139.47	2563.43	3462.75	3209.7	2782.96	3460.19	2895.74	3618.1	3363.62	3811.47	2619.22	3853.35	3372.79	2712.47	2242.84	3333.78	2262.82	2482.7	3652.5		138.247	133.662	134.22	136.664	139.926	147.192	143.667	143.405	141.949	141.534	141.263	143.007	150.864	146.311	142.41	143.669	143.163	141.674	145.731		142.029	4.14134	140
141	3133.97	2560.67	3481.5	3218.49	2788.94	3458.8	2896.65	3616.18	3372.06	3821.04	2630.05	3849.61	3371.17	2738.16	2240.29	3347.69	2274.29	2484.27	3655.4		138.005	133.518	134.947	137.039	140.227	147.133	143.712	143.329	142.305	141.889	141.847	142.868	150.792	147.696	142.248	144.268	143.889	141.764	145.846		142.28	4.16258	141
142	3133.42	2578.19	3478.08	3220.48	2786.66	3445.75	2903.24	3628.23	3364.52	3809.6	2629.12	3860.02	3371.67	2728.24	2229.86	3333.65	2263.92	2475.14	3651.29		137.981	134.431	134.815	137.123	140.113	146.578	144.039	143.806	141.987	141.465	141.797	143.254	150.814	147.161	141.585	143.663	143.233	141.243	145.683		142.146	4.00796	142
143	3129.04	2595.14	3482.14	3211.12	2787.99		2897.18	3618	3365.62	3813.68	2631.87	3843.22	3374.47	2737.79	2246.53	3337.99	2258.51	2488.29	3658.51		137.788	135.315	134.972	136.725	140.18		143.738	143.401	142.033	141.616	141.945	142.631	150.94	147.677	142.644	143.85	142.89	141.993	145.971		142.017	3.95127	143
144	3144.91	2577.04	3482.36	3206.57	2788.33	3452.03		3632.33	3365.6	3816.54	2630	3852.42	3365.09	2726.7	2240.13	3314.78	2274.38	2481.4	3654.92		138.487	134.371	134.98	136.531	140.196	146.845		143.969	142.033	141.722	141.844	142.972	150.52	147.078	142.237	142.85	143.894	141.6	145.828		142.109	4.07376	144
145	3149.69	2594.43	3492.74		2789.48	3451.1		3623.37	3380.16	3833.64	2635.13	3857.93	3381.22	2740.31	2243.82	3342.27	2268.38	2492.5	3664.01		138.697	135.278	135.383		140.254	146.806		143.614	142.647	142.357	142.121	143.177	151.241	147.813	142.472	144.035	143.515	142.234	146.19		142.814	3.93158	145
146	3142.98	2587.93	3483.89		2799.38	3437.03	2894.62	3624.54	3374.56	3838.02	2631.32	3857.68	3382.25	2728.33	2248.96	3339.58	2273.91	2493.76	3660.9		138.402	134.939	135.04		140.752	146.207	143.611	143.66	142.411	142.52	141.916	143.167	151.287	147.166	142.798	143.919	143.865	142.305	146.066		142.779	3.83035	146
147	3151.11	2590	3502.74	3215.63	2810.38	3455.43	2897.92	3638.78	3370.03	3832.38	2646.72	3859.65	3373.39	2734.27	2243.49	3324.51		2500.46	3664.93		138.76	135.047	135.77	136.917	141.305	146.99	143.775	144.224	142.219	142.31	142.746	143.24	150.891	147.486	142.451	143.269		142.688	146.227		142.573	3.96229	147
148	3175.01	2595.2	3506.45	3215.7	2802.74	3447.95		3635.13	3371.82	3801.35	2639.24	3837.04	3383.74	2733.89	2238.36	3339.53	2291.81	2480.03	3677.33		139.812	135.318	135.914	136.92	140.921	146.672		144.08	142.295	141.158	142.343	142.401	151.354	147.466	142.125	143.917	144.997	141.522	146.721		142.552	3.99822	148
149	3169.03	2592.41	3506.26	3211.33	2808.72	3446.22	2898.24	3623.65	3358.26	3818.27	2644.45	3863.96	3387.9	2729.78	2229.02	3332.39	2302	2485.27	3679.14		139.549	135.173	135.907	136.734	141.222	146.598	143.791	143.625	141.723	141.786	142.624	143.4	151.54	147.244	141.532	143.609	145.642	141.821	146.794		142.648	3.95482	149
150	3179.06	2608.82	3509.38	3223.43	2814.85	3453.79	2893.03	3633.74	3367.92	3818.23	2643.2	3866.07	3387.16	2759.06	2247.75	3340.31	2294	2490.36	3675.92		139.99	136.029	136.028	137.249	141.53	146.92	143.532	144.025	142.13	141.785	142.556	143.478	151.507	148.824	142.721	143.95	145.136	142.111	146.665		142.956	3.88575	150
151	3170.34	2602.11	3516.41	3214.46	2814.97	3460.14	2888.84	3645.6	3358.4	3818.83	2642.23	3850.44	3375.36	2750.89	2245.55	3331.61	2290.88	2500.56	3679.31		139.607	135.678	136.3	136.867	141.536	147.19	143.324	144.495	141.729	141.807	142.504	142.899	150.979	148.383	142.581	143.575	144.938	142.693	146.801		142.836	3.86543	151
152	3174.33	2609.39	3525.11	3214.81	2805.39	3449.83	2891.62	3650.29	3366.04	3821.57	2650.78	3866.9	3377.28	2764.77	2233.2	3329.89	2286.32	2506.44	3677.62		139.782	136.058	136.637	136.882	141.054	146.752	143.462	144.681	142.051	141.909	142.965	143.509	151.065	149.132	141.797	143.501	144.65	143.029	146.733		142.929	3.84305	152
153	3171.88	2613.38	3522.37	3223.62	2808.52	3454.4	2885.64	3650.8	3345.69	3828.65	2648.44	3862.26	3377.87	2732.45	2240.46	3347.78	2288.64		3675.17		139.675	136.266	136.531	137.257	141.212	146.946	143.165	144.701	141.192	142.172	142.839	143.337	151.092	147.389	142.259	144.272	144.797		146.635		142.874	3.80111	153
154	3189.36	2611.98	3535.84	3203.32	2821.11	3442.68	2881.38	3644.21	3353.29	3814.49	2655.39	3850.99	3392.59	2748.13	2240.06	3313.58	2283.43	2486.09	3688.31		140.444	136.193	137.053	136.393	141.845	146.448	142.954	144.44	141.513	141.646	143.214	142.919	151.75	148.234	142.233	142.798	144.467	141.868	147.16		142.82	3.81124	154
155	3204.58	2611.76	3524.24	3212.61	2812.01	3462.32	2884.95	3654.22	3352.29	3815.54	2654.6	3860.04	3375.95	2747.23	2245.55	3327.93	2294.73	2515.31	3678.84		141.114	136.182	136.604	136.788	141.387	147.283	143.131	144.836	141.471	141.685	143.171	143.255	151.006	148.186	142.582	143.417	145.182	143.535	146.782		143.031	3.76056	155
156	3185.93	2612.29	3545.01	3218.05	2813.22	3456.9	2880.46	3652.18	3355.87	3832.89	2664.7	3864.88	3379.82	2743.03	2247.2	3342.61	2294.91	2512.33	3694.95		140.293	136.209	137.409	137.02	141.448	147.052	142.909	144.756	141.622	142.329	143.716	143.435	151.179	147.959	142.687	144.049	145.193	143.365	147.425		143.161	3.71448	156
157	3189.79	2630.08	3543.56	3218.8	2814.8	3441.66	2888.15	3645.1	3351.86	3823.17	2671.27	3861.07	3392.4	2728.53	2256.79	3338.54	2296.47	2524.84	3686.1		140.463	137.137	137.353	137.052	141.527	146.404	143.29	144.475	141.452	141.968	144.07	143.293	151.741	147.177	143.295	143.874	145.292	144.079	147.072		143.211	3.59563	157
158	3203.6	2625.41	3548.96	3213.79	2812.44	3458.97	2878.37	3649.36	3341.34	3824.85	2655.89	3855.93	3395.86	2739.47	2265.6	3334.66	2286.34	2517.11	3685.34		141.071	136.894	137.562	136.838	141.409	147.14	142.805	144.644	141.009	142.031	143.241	143.102	151.896	147.767	143.855	143.707	144.651	143.638	147.041		143.174	3.68438	158
159	3217.19	2621.47	3543.07	3207.38	2817.88	3454.6	2877.29	3647.22	3341.67	3824.24	2665.54	3854.49	3387.76	2749.35	2243.69	3333.8	2293.21	2525.43	3705.76		141.669	136.688	137.334	136.566	141.682	146.955	142.752	144.559	141.022	142.008	143.761	143.049	151.534	148.3	142.464	143.669	145.085	144.113	147.856		143.214	3.77256	159
160	3201.42	2636.25	3559	3202.12	2817.87	3448.55	2869.44	3650.2	3342.28	3820.52	2661.74	3844.11	3390.91	2743.5	2246.72	3332.59	2291.17	2532.41	3687.39		140.975	137.459	137.951	136.342	141.682	146.697	142.362	144.677	141.048	141.87	143.556	142.664	151.675	147.985	142.656	143.618	144.956	144.511	147.123		143.148	3.64231	160
161	3207.05	2626.25	3561.07	3209.59	2818.11	3449.29	2877.69	3661.98	3344.21	3828.59	2672.68	3848.79	3385.3	2734.91	2243.16	3329.04	2287.87	2525.79	3706.19		141.223	136.937	138.032	136.66	141.694	146.729	142.771	145.144	141.13	142.17	144.146	142.837	151.424	147.521	142.43	143.465	144.748	144.133	147.873		143.214	3.62554	161
162	3218.8	2624.36	3547.81	3200.4	2814.63	3452.71	2866.31	3655.72	3327.87	3830.88	2664.11	3852.98	3374.01	2756.64	2245.17	3324.11	2294.23	2532.2	3712.29		141.74	136.839	137.517	136.268	141.519	146.874	142.206	144.896	140.44	142.255	143.684	142.993	150.919	148.694	142.558	143.252	145.15	144.499	148.117		143.18	3.78183	162
163	3218.87	2637.52	3557.24	3208.57	2812.48	3443.99	2869.33	3653.43	3324.61	3817.01	2669.29	3852.54	3379.67	2750.55	2249.38	3328.87	2299.12	2540.18	3699.06		141.743	137.525	137.883	136.616	141.411	146.503	142.356	144.805	140.303	141.74	143.963	142.976	151.172	148.365	142.825	143.457	145.46	144.954	147.588		143.245	3.64438	163
164	3218.89	2614.34	3578.11	3219.21	2820.04	3448.89	2860.71	3650.45	3332.72	3820.42	2648.47	3846.61	3383.18	2749.31	2242.48	3342.6	2288.82	2535.52	3694.46		141.744	136.316	138.692	137.069	141.791	146.712	141.929	144.687	140.645	141.866	142.841	142.756	151.329	148.298	142.387	144.049	144.808	144.689	147.405		143.159	3.6281	164
165	3223.77	2629.58	3587.55	3200.67	2813.85	3455.82	2860.4	3660.57	3323.12	3830.51	2668.68	3852.08	3379.22	2749.02	2250.17	3320.59	2295.96	2532.47	3705.14		141.959	137.111	139.058	136.28	141.479	147.007	141.913	145.088	140.24	142.241	143.93	142.96	151.152	148.282	142.875	143.1	145.259	144.514	147.831		143.278	3.64963	165
166	3235.86	2643	3577.03	3209.39	2818.02	3443.41	2858.32	3659.43	3325.56	3816.79	2667.91	3838.75	3373.13	2751.7	2255.44	3325.84	2302.79	2536.24	3699.5		142.492	137.811	138.65	136.651	141.689	146.479	141.81	145.043	140.343	141.731	143.889	142.464	150.879	148.427	143.209	143.327	145.691	144.73	147.606		143.312	3.53075	166
167	3226.83	2643.24	3593.52	3206.07	2834.65	3434.38	2855.04	3651.04	3326.8	3819.05	2670.12	3839.75	3371.68	2735.65	2241.31	3321.83	2308.57	2542.17	3703.3		142.094	137.823	139.289	136.51	142.525	146.095	141.648	144.71	140.395	141.816	144.008	142.502	150.815	147.561	142.313	143.154	146.057	145.068	147.758		143.271	3.43936	167
168	3238.86	2654.38	3596.18	3212.49	2823.95	3456.86	2844.15	3654.24	3308.71	3811.53	2674.8	3837.29	3381.34	2741.3	2258.23	3311.86	2305.98	2550.97	3720.24		142.624	138.404	139.392	136.783	141.988	147.051	141.107	144.837	139.632	141.536	144.261	142.41	151.247	147.866	143.386	142.724	145.894	145.57	148.434		143.429	3.59589	168
169	3229.14	2649.33	3590.39	3213.82	2822.93	3442.79	2849.05	3645.86	3307.16	3829.57	2670.43	3818.71	3367.94	2757.37	2253.8	3336.75	2302.73	2546.28	3702.6		142.196	138.141	139.168	136.84	141.936	146.452	141.35	144.505	139.566	142.206	144.025	141.721	150.647	148.733	143.106	143.797	145.688	145.302	147.73		143.322	3.51657	169
170	3250.71	2655.12	3597.04	3215.61	2826.16	3448.17	2838.22	3654.23	3316.73	3808.51	2683.22	3826.4	3375.57	2743.59	2268.55	3322.53	2303.68	2554.09	3711.55		143.145	138.442	139.425	136.916	142.099	146.681	140.813	144.837	139.97	141.424	144.714	142.006	150.989	147.99	144.042	143.184	145.748	145.748	148.087		143.487	3.51683	170
171	3250.3	2650.78	3596.66	3205.55	2835.62	3437.53	2849.23	3650.77	3306.6	3809.82	2676.65	3821.23	3370.36	2741.07	2255.55	3317.96	2310.57	2549.51	3729.47		143.128	138.217	139.411	136.488	142.574	146.229	141.359	144.7	139.543	141.473	144.36	141.815	150.755	147.853	143.217	142.987	146.184	145.487	148.802		143.399	3.57341	171
172	3264.39	2652.57	3598.99	3211.22	2831.44	3434.11	2830.23	3653.13	3301.72	3813.13	2681.38	3838.79	3365.18	2744.71	2244.64	3315.66	2305.19	2550.42	3722.6		143.748	138.31	139.501	136.729	142.364	146.083	140.416	144.793	139.337	141.595	144.615	142.466	150.524	148.05	142.524	142.888	145.843	145.539	148.528		143.361	3.53309	172
173	3263.07	2650.42	3608.94	3205.41	2825.75	3429.91	2834.61	3666.3	3315.06	3819.14	2657.42	3834.03	3363.9	2754.51	2255.09	3312.01	2305.7	2558.03	3734.9		143.69	138.198	139.887	136.482	142.078	145.904	140.634	145.315	139.9	141.819	143.323	142.289	150.467	148.578	143.187	142.73	145.876	145.973	149.019		143.439	3.58521	173
174	3248.04	2654.81	3609.13	3219.14	2830.77	3443.67	2822.68	3662.37	3293.42	3809.75	2669.73	3823.11	3351.14	2736.56	2240.89	3325.93	2299.01	2553.46	3726.77		143.028	138.426	139.894	137.066	142.33	146.49	140.042	145.159	138.986	141.47	143.987	141.884	149.896	147.61	142.286	143.331	145.453	145.712	148.694		143.25	3.45283	174
175	3266.89	2666.82	3615.49	3214.23	2836.53	3424.6	2831.75	3662.53	3285.95	3812.74	2679.89	3822.1	3365.55	2746.22	2250.76	3314.37	2309.22	2562.32	3729.89		143.858	139.053	140.141	136.857	142.62	145.679	140.492	145.166	138.671	141.581	144.535	141.847	150.54	148.131	142.913	142.832	146.099	146.218	148.819		143.476	3.5369	175
176	3272.17	2673.86	3628.46	3221.31	2835.89	3437.02	2834.84	3667.66	3279.16	3809.21	2679.01	3824.6	3348.33	2745.89	2251.72	3319.6	2308.92	2569.34	3742.65		144.091	139.42	140.643	137.159	142.588	146.207	140.645	145.369	138.385	141.45	144.487	141.939	149.77	148.113	142.973	143.058	146.08	146.618	149.328		143.596	3.48066	176
177	3282.7	2661.89	3618.59	3228.24	2841.13	3424.11	2819.98	3660.82	3282.85	3798.46	2668.33	3814.68	3359.19	2750.13	2237.64	3299.23	2307.21	2569.47	3732.54		144.554	138.796	140.261	137.454	142.851	145.658	139.908	145.098	138.54	141.051	143.912	141.571	150.256	148.342	142.079	142.18	145.971	146.626	148.924		143.37	3.57725	177
178	3278.68	2666.68	3631.98	3210.46	2836.06	3426.07	2823.15	3653.12	3283	3807.43	2684.76	3823.68	3359.94	2738.75	2245.98	3329.43	2314.73	2565.65	3738.33		144.377	139.046	140.78	136.697	142.596	145.741	140.065	144.793	138.546	141.384	144.797	141.906	150.289	147.729	142.609	143.481	146.447	146.408	149.155		143.518	3.55952	178
179	3279.42	2675.89	3636.03	3207.57	2838.34	3434.72	2824.5	3670.7	3287.58	3818.24	2667.84	3820.78	3353.05	2745.04	2256.1	3303.59	2313.08	2578.3	3749		144.41	139.526	140.937	136.574	142.711	146.109	140.132	145.49	138.74	141.785	143.885	141.798	149.981	148.068	143.251	142.368	146.343	147.13	149.581		143.622	3.58877	179
180	3291.3	2669.65	3639.3	3212.29	2847.22	3431.89	2813.96	3680.54	3291.89	3817.87	2672.05	3814.02	3349.46	2739.21	2229.98	3309.51	2312.96	2573.57	3760.73		144.933	139.201	141.064	136.775	143.157	145.988	139.609	145.88	138.922	141.772	144.112	141.547	149.82	147.753	141.593	142.623	146.335	146.86	150.049		143.579	3.63819	180
181	3286.87	2683.23	3631.46	3215.03	2851.65	3422.14	2807.83	3676.27	3273.88	3803.86	2685	3790.92	3356.53	2740.28	2248.14	3312.25	2317.16	2573.05	3759.4		144.738	139.908	140.76	136.891	143.38	145.574	139.305	145.71	138.162	141.252	144.811	140.69	150.137	147.811	142.746	142.741	146.601	146.83	149.996		143.581	3.7144	181
182	3298.45	2666.21	3648.08	3207.77	2852.68	3422.55	2814.84	3663.25	3275.24	3803.71	2681.85	3795.31	3336.14	2735.48	2247.36	3312.39	2317.05	2586.38	3750.1		145.248	139.021	141.404	136.582	143.432	145.591	139.653	145.194	138.219	141.246	144.641	140.852	149.225	147.552	142.697	142.747	146.594	147.591	149.625		143.532	3.64835	182
183	3297.36	2682.36	3645.74	3208.41	2855.03	3422.39	2815.97	3668.25	3276.19	3812.42	2679.8	3795.74	3348.92	2743.59	2241.59	3316.69	2330.2	2592.61	3755.87		145.2	139.863	141.313	136.61	143.55	145.584	139.709	145.393	138.259	141.569	144.53	140.868	149.796	147.989	142.33	142.932	147.426	147.946	149.855		143.722	3.74144	183
184	3305.98	2680.53	3664.01	3222.16	2859.78	3426.85	2816.06	3663.49	3282.19	3812.92	2669.88	3792.98	3343.4	2756.56	2238.56	3320.84	2331.64	2589.87	3763.11		145.58	139.768	142.022	137.195	143.789	145.774	139.714	145.204	138.512	141.588	143.995	140.766	149.55	148.689	142.138	143.111	147.517	147.79	150.144		143.834	3.7066	184
185	3308.86	2683.19	3656.88	3214.32	2859.95	3426.98	2799.99	3668.72	3262.26	3826.32	2680.98	3796.23	3347.12	2739.89	2251.93	3320.82	2327.86	2591.23	3770.3		145.706	139.906	141.745	136.861	143.797	145.78	138.916	145.411	137.671	142.085	144.594	140.886	149.716	147.79	142.987	143.11	147.278	147.868	150.431		143.818	3.81002	185
186	3311.47	2676.51	3659.93	3206.04	2853	3435.47	2814.8	3667.29	3262.54	3815.37	2681.75	3804.2	3341.51	2733.9	2255.15	3319.79	2324.41	2601.27	3771.51		145.821	139.558	141.863	136.508	143.448	146.141	139.651	145.354	137.683	141.679	144.635	141.183	149.465	147.467	143.191	143.066	147.059	148.44	150.479		143.826	3.81757	186
187	3315.53	2689.27	3670.61	3222.85	2860.41	3424.85	2803.97	3675.84	3267.67	3806.5	2676.28	3791.23	3347.97	2740.69	2248.2	3325.97	2332.87	2597.59	3775.64		146	140.223	142.277	137.224	143.82	145.689	139.113	145.693	137.9	141.349	144.34	140.701	149.754	147.833	142.749	143.332	147.595	148.23	150.644		143.919	3.81592	187
188	3312.74	2680.77	3679.82	3221.79	2866.1	3438.74	2803.52	3666	3276.04	3815.33	2683.9	3791.06	3341.93	2740.42	2247.47	3325	2321.35	2593.12	3787.11		145.877	139.78	142.634	137.179	144.107	146.28	139.091	145.303	138.253	141.677	144.751	140.695	149.484	147.818	142.703	143.29	146.866	147.975	151.102		143.94	3.78262	188
189	3318.71	2682.92	3684.49	3209.99	2867.35	3450.19	2809.45	3678.17	3253.31	3815.75	2668.53	3780.03	3328.13	2747.92	2246.27	3325.75	2326.85	2607.4	3787.16		146.14	139.892	142.815	136.677	144.17	146.767	139.386	145.786	137.294	141.693	143.922	140.286	148.867	148.223	142.627	143.323	147.214	148.79	151.104		143.946	3.9756	189
190	3327.68	2696.44	3684.72	3208.55	2857.99	3439.07	2802.56	3677.68	3253.94	3822.88	2690.62	3785.78	3339.2	2734.3	2243.13	3319.34	2327.23	2604.16	3784.72		146.535	140.597	142.824	136.615	143.699	146.294	139.044	145.766	137.32	141.958	145.114	140.499	149.362	147.488	142.428	143.047	147.238	148.605	151.006		143.97	3.93568	190
191	3330.17	2703.82	3680.27	3226.95	2861.35	3432.48	2799.32	3677.71	3265.39	3830.49	2681.11	3786.83	3343.94	2736.09	2247.79	3329.13	2344.39	2605.78	3774.59		146.645	140.982	142.652	137.399	143.868	146.014	138.883	145.768	137.804	142.24	144.601	140.538	149.574	147.585	142.724	143.468	148.324	148.698	150.602		144.124	3.82931	191
192	3320.64	2690.51	3678.72	3224.03	2868.77	3430.39	2800.59	3685.69	3257.96	3815.58	2682.45	3793.54	3333.53	2742.12	2240.14	3331.54	2337.01	2621.18	3788		146.225	140.288	142.591	137.274	144.241	145.925	138.946	146.084	137.49	141.686	144.673	140.787	149.108	147.91	142.238	143.572	147.857	149.576	151.137		144.085	3.97061	192
193	3329.51	2692.02	3685.46	3217.74	2868.59	3435.77	2790.49	3692.56	3249.13	3838.06	2686.92	3784.78	3339.21	2733.88	2245.8	3329.87	2334.08	2606.77	3787.18		146.616	140.367	142.853	137.007	144.232	146.154	138.445	146.356	137.117	142.521	144.914	140.462	149.362	147.466	142.598	143.5	147.671	148.755	151.105		144.079	3.99803	193
194	3323.25	2692.56	3699.34	3213.3	2859.18	3434.62	2806.35	3685.89	3249.68	3818.69	2685.38	3774.27	3326.74	2745.07	2256	3330.64	2342.91	2617.74	3799.94		146.34	140.395	143.391	136.818	143.759	146.105	139.232	146.092	137.14	141.802	144.831	140.072	148.804	148.069	143.245	143.534	148.23	149.38	151.613		144.15	4.07066	194
195	3325.94	2701.79	3693.08	3208.25	2865.3	3433.6	2785.03	3683.57	3253.9	3827.57	2692.68	3772.66	3342.66	2748.39	2254.07	3324.14	2341.72	2603.16	3793.11		146.458	140.876	143.148	136.602	144.067	146.061	138.174	146	137.319	142.132	145.225	140.012	149.517	148.248	143.123	143.254	148.154	148.548	151.341		144.119	4.10625	195
196	3336.55	2686.67	3703.17	3221.03	2877.55	3429.77	2804.19	3688.28	3250.97	3826.98	2680.41	3767.14	3349.17	2762.05	2248.12	3340	2343.88	2609.21	3795.55		146.926	140.088	143.539	137.147	144.682	145.899	139.125	146.186	137.195	142.11	144.563	139.807	149.808	148.985	142.745	143.937	148.291	148.894	151.438		144.282	4.15354	196
197	3343.34	2687.67	3699.19	3226.39	2866.04	3435.44	2802.39	3688.74	3247.17	3828.74	2681.02	3759.18	3328.41	2735.72	2254.15	3335.13	2340.39	2619.45	3801.12		147.225	140.14	143.385	137.375	144.104	146.139	139.035	146.205	137.035	142.175	144.596	139.512	148.879	147.565	143.128	143.727	148.071	149.478	151.661		144.181	4.09113	197
198	3343.89	2708.43	3706.74	3223.21	2864.38	3439.53	2790.86	3704.6	3258.69	3822.2	2693.25	3776.3	3330	2739.48	2254.75	3334.1	2345.72	2626.81	3806.67		147.249	141.222	143.678	137.24	144.02	146.314	138.463	146.833	137.521	141.932	145.255	140.147	148.95	147.768	143.165	143.682	148.408	149.898	151.882		144.401	4.12672	198
199	3335.27	2710.02	3699.95	3219.07	2868.89	3433.87	2782.41	3691.46	3240.6	3839.2	2680.44	3768.71	3335.32	2749.91	2260.4	3330.99	2342.14	2621.57	3807.96		146.869	141.305	143.414	137.063	144.247	146.073	138.044	146.313	136.757	142.564	144.565	139.865	149.188	148.33	143.524	143.549	148.181	149.599	151.933		144.283	4.21408	199
200	3350.44	2709.69	3714.59	3208.61	2876.41	3438.45	2806.7	3697.63	3245.42	3834.74	2693.11	3764.35	3335.34	2744.42	2254.14	3325.51	2345.72	2623.58	3808.86		147.537	141.288	143.982	136.618	144.625	146.268	139.249	146.557	136.961	142.398	145.248	139.703	149.189	148.034	143.127	143.312	148.408	149.714	151.969		144.431	4.21543	200
201	3340.11	2706.31	3720.89	3204.18	2883.43	3429.82	2785.92	3695.26	3257.17	3827.73	2689.73	3775.49	3348.73	2741.2	2254.54	3333.01	2339.35	2633.04	3813.15		147.082	141.112	144.226	136.429	144.978	145.9	138.218	146.463	137.457	142.138	145.066	140.117	149.788	147.86	143.153	143.635	148.005	150.254	152.14		144.422	4.2862	201
202	3348.34	2705.87	3719.39	3204.68	2878.03	3449.84	2793.86	3691.86	3240.93	3827.68	2698.6	3759.28	3332.66	2737.35	2267.8	3337.45	2345.47	2641.07	3822.11		147.445	141.089	144.168	136.451	144.706	146.752	138.612	146.328	136.771	142.136	145.544	139.515	149.069	147.653	143.994	143.827	148.392	150.712	152.498		144.509	4.40584	202
203	3346.74	2714.86	3720.38	3229.87	2880.67	3443.37	2779.36	3703.8	3235.62	3837.52	2682.46	3766.21	3345.4	2746.5	2260.04	3331.6	2346.28	2628.02	3819.05		147.374	141.557	144.206	137.523	144.839	146.477	137.893	146.802	136.547	142.501	144.674	139.772	149.639	148.146	143.501	143.575	148.443	149.967	152.376		144.517	4.33653	203
204	3354.36	2700.96	3720.24	3212.66	2880.19	3434.88	2793.11	3704.48	3235.84	3835.57	2702.22	3756.77	3326.9	2746.66	2269.03	3335.92	2336.39	2639.55	3811.11		147.71	140.833	144.201	136.79	144.815	146.116	138.575	146.829	136.557	142.429	145.74	139.422	148.811	148.155	144.073	143.761	147.817	150.625	152.059		144.49	4.35023	204
205	3351.92	2717.91	3737.4	3200.43	2882.11	3439.15	2778.95	3711.84	3232.11	3835.66	2692.03	3754.58	3328.62	2733.43	2278.42	3339.52	2352.65	2635.69	3819.99		147.603	141.716	144.866	136.27	144.912	146.297	137.873	147.12	136.399	142.432	145.19	139.341	148.888	147.442	144.669	143.916	148.846	150.404	152.413		144.558	4.47811	205
206	3344.26	2711.23	3728.89	3210.22	2872.98	3449.34	2777.55	3704.01	3238.23	3840.18	2697.36	3752.1	3324.49	2742.18	2272.81	3350.92	2365.13	2623.92	3833.91		147.265	141.369	144.536	136.687	144.452	146.731	137.803	146.81	136.657	142.6	145.477	139.249	148.704	147.913	144.313	144.408	149.636	149.733	152.969		144.595	4.48381	206
207	3359.46	2712.32	3735.31	3217.97	2890.11	3437.39	2775.83	3705.96	3231.6	3834.17	2689.37	3750.35	3324.5	2761.17	2273.12	3330.91	2354.76	2642.33	3831.87		147.935	141.425	144.785	137.016	145.314	146.223	137.718	146.887	136.378	142.377	145.046	139.184	148.704	148.938	144.332	143.545	148.98	150.784	152.888		144.656	4.5852	207
208	3359.14	2718.43	3737.43	3213.51	2873.71	3447.97	2784.7	3699.97	3238.59	3838.51	2693.39	3757.66	3331.8	2749.17	2266.89	3342.49	2363.83	2651.93	3824.89		147.92	141.744	144.867	136.827	144.489	146.672	138.158	146.65	136.672	142.538	145.263	139.455	149.031	148.29	143.937	144.044	149.554	151.332	152.609		144.74	4.53827	208
209	3344.69	2717.04	3733.94	3214.31	2888.71	3445	2779.49	3695.74	3234.28	3849.19	2694.56	3745	3345.96	2756.03	2269.13	3337.9	2355.81	2643.34	3837.49		147.284	141.671	144.732	136.861	145.244	146.546	137.899	146.482	136.49	142.934	145.326	138.985	149.664	148.66	144.079	143.846	149.046	150.841	153.112		144.721	4.60433	209
210	3360.88	2716.82	3744.9	3203.83	2891.56	3440.4	2782.15	3712.87	3215.21	3845.97	2700.33	3759.13	3342.62	2749.04	2278.18	3337.16	2362.71	2644.35	3827.25		147.997	141.66	145.157	136.415	145.387	146.351	138.031	147.161	135.686	142.815	145.637	139.51	149.515	148.284	144.653	143.815	149.482	150.899	152.703		144.798	4.68647	210
211	3374.58	2710.24	3747.68	3197.04	2897.98	3450.65	2797.18	3713.29	3229.3	3850.59	2706.33	3750.46	3332.77	2756.52	2272.51	3342.86	2357.29	2634.34	3831.82		148.6	141.317	145.264	136.126	145.71	146.787	138.777	147.178	136.28	142.986	145.961	139.188	149.074	148.687	144.294	144.06	149.14	150.328	152.886		144.876	4.62427	211
212	3362.79	2726.58	3738.93	3208.51	2893.3	3430.77	2775.47	3721.98	3222.56	3853.75	2700.1	3748.21	3347.62	2743.94	2278.9	3346.73	2366.81	2653.2	3837.92		148.081	142.169	144.925	136.614	145.474	145.941	137.7	147.522	135.996	143.104	145.625	139.104	149.739	148.008	144.699	144.227	149.742	151.404	153.129		144.905	4.75733	212
213	3362.88	2714.36	3743.11	3194.6	2888.08	3448.92	2775.45	3723.28	3216.62	3854.89	2688.42	3742.53	3350.01	2758.86	2285.53	3338.75	2367.98	2658.99	3834.98		148.085	141.531	145.087	136.021	145.212	146.713	137.699	147.574	135.745	143.146	144.995	138.894	149.845	148.813	145.12	143.883	149.816	151.734	153.011		144.891	4.93773	213
214	3370.28	2708.64	3751.57	3200.99	2893.43	3459.75	2788.18	3701.93	3238.42	3852.62	2696.37	3740.59	3333.54	2743.99	2291.31	3328.36	2344.4	2652.55	3837		148.411	141.233	145.415	136.294	145.481	147.174	138.33	146.728	136.665	143.062	145.424	138.822	149.108	148.011	145.487	143.435	148.324	151.367	153.092		144.835	4.65089	214
215	3366.42	2710.11	3751.91	3204.07	2893.17	3449.63	2772.47	3728.89	3211.98	3854.49	2696.96	3748.18	3341.45	2757.82	2277.54	3340.18	2347.05	2658.16	3837.28		148.241	141.31	145.429	136.425	145.468	146.743	137.551	147.796	135.549	143.131	145.456	139.104	149.462	148.757	144.613	143.944	148.492	151.687	153.103		144.856	4.86477	215
216	3368.62	2732.29	3761.18	3201.11	2894.76	3452.62	2775.37	3723.82	3210.21	3853.75	2708.39	3730.16	3340.12	2758.1	2282.42	3338.47	2359.95	2647.27	3850.71		148.338	142.467	145.788	136.299	145.548	146.87	137.695	147.595	135.475	143.104	146.072	138.435	149.403	148.772	144.923	143.871	149.308	151.065	153.639		144.982	4.92706	216
217	3365.08	2710.98	3754.02	3206.44	2898.09	3446.18	2789.01	3719.43	3210.91	3871.06	2690.49	3728.98	3328.51	2764.9	2284.03	3336.52	2359.51	2662.9	3852.8		148.182	141.355	145.51	136.526	145.715	146.596	138.371	147.421	135.504	143.747	145.107	138.391	148.883	149.139	145.025	143.787	149.281	151.957	153.723		144.959	4.92173	217
218	3382.7	2719.23	3759.15	3186.23	2897.72	3446.14	2780.6	3729.52	3207.54	3863.27	2690.7	3729.28	3337.93	2761.35	2281.58	3333.74	2371.51	2656.45	3848.68		148.958	141.785	145.709	135.665	145.696	146.595	137.954	147.821	135.362	143.458	145.118	138.402	149.305	148.947	144.869	143.667	150.039	151.589	153.558		144.974	5.08368	218
219	3359.44	2725.67	3766.6	3202.13	2901.05	3453.19	2778.81	3732.45	3220.74	3861.76	2690.5	3736.13	3337.45	2763.36	2299.26	3342.82	2347.93	2664.7	3846.05		147.933	142.121	145.998	136.342	145.864	146.895	137.866	147.937	135.919	143.401	145.107	138.656	149.283	149.056	145.992	144.058	148.548	152.06	153.453		145.078	4.87979	219
220	3368.97	2718.97	3773.98	3189.74	2897.54	3453.06	2785.83	3727.84	3208.52	3864.22	2691.44	3737.88	3340.12	2765.4	2289.9	3349.95	2371.34	2655.96	3842.45		148.353	141.772	146.284	135.815	145.687	146.889	138.214	147.754	135.404	143.493	145.158	138.721	149.403	149.166	145.398	144.366	150.029	151.561	153.309		145.093	4.99316	220
221	3377	2727.74	3769.82	3194.44	2899.91	3452.49	2788.83	3724.29	3216.39	3862.18	2693	3719.21	3332.74	2761.34	2286.71	3335.86	2369.76	2664.53	3854.51		148.707	142.229	146.123	136.015	145.807	146.865	138.362	147.614	135.735	143.417	145.242	138.028	149.073	148.947	145.195	143.758	149.929	152.05	153.791		145.099	5.02765	221
222	3378.12	2732.1	3774.93	3184.49	2898.68	3450.97	2776.35	3721.81	3208.74	3858.98	2687.85	3730.42	3338.76	2763.21	2290.82	3329.45	2365.65	2658.81	3852.19		148.756	142.457	146.321	135.591	145.745	146.8	137.743	147.515	135.413	143.298	144.964	138.444	149.342	149.048	145.456	143.482	149.669	151.724	153.698		145.025	5.08781	222
223	3378.15	2727.08	3761.77	3202.83	2908.12	3463.46	2785.7	3726.95	3211.96	3857.78	2705.8	3728.6	3367.57	2764.77	2284.53	3337.36	2361.66	2669.43	3851.38		148.758	142.195	145.811	136.372	146.22	147.332	138.207	147.719	135.549	143.254	145.932	138.377	150.631	149.132	145.057	143.823	149.416	152.33	153.666		145.252	5.08844	223
224	3372.06	2723.01	3768.89	3196.21	2903.62	3452.52	2785.48	3722.93	3206.59	3862.44	2686.15	3734.39	3336.64	2760.96	2300.63	3333.4	2371.21	2671.56	3854.68		148.489	141.982	146.087	136.09	145.993	146.866	138.196	147.56	135.322	143.427	144.872	138.592	149.247	148.927	146.079	143.653	150.02	152.452	153.798		145.14	5.08133	224
225	3367.71	2717.49	3777.12	3180.33	2893.75	3448.39	2785.86	3748.42	3200.65	3861.13	2696.62	3721.93	3340.53	2753.6	2292.16	3332.02	2362.16	2673.58	3859.36		148.298	141.695	146.406	135.414	145.497	146.691	138.215	148.57	135.071	143.378	145.437	138.129	149.421	148.529	145.541	143.593	149.448	152.567	153.984		145.047	5.22221	225
226	3383.99	2735.35	3778.43	3181.88	2897.82	3450.79	2778.79	3728.41	3204.92	3861.87	2693.86	3714.43	3340.37	2745.88	2276.22	3336.27	2372.76	2670.07	3862.3		149.015	142.626	146.456	135.48	145.702	146.792	137.864	147.777	135.252	143.405	145.288	137.851	149.414	148.113	144.529	143.776	150.118	152.366	154.102		145.049	5.23027	226
227	3372.24	2717.35	3768.89	3185.85	2889.78	3452.99	2789.08	3734.83	3182.79	3864.78	2693.82	3701.69	3354	2767.64	2281.87	3348.92	2370.53	2674.23	3864.78		148.497	141.688	146.087	135.649	145.297	146.886	138.375	148.031	134.317	143.513	145.287	137.378	150.024	149.287	144.888	144.321	149.977	152.604	154.201		145.069	5.40126	227
228	3375.82	2725.03	3776.51	3195.1	2906.9	3450.87	2778.57	3737.66	3212.12	3877.08	2694.54	3706.59	3342.83	2760.11	2288.6	3343.92	2362.34	2688.37	3852.1		148.655	142.088	146.382	136.043	146.158	146.796	137.853	148.144	135.556	143.97	145.325	137.56	149.524	148.88	145.315	144.106	149.459	153.411	153.695		145.206	5.21667	228
229	3375.42	2718.76	3786.01	3176.15	2893.09	3456.25	2782.51	3731.15	3205.68	3867.83	2694.75	3710.8	3349.14	2751.45	2302.24	3336.87	2375.22	2673.46	3864.88		148.637	141.761	146.75	135.236	145.464	147.025	138.049	147.886	135.284	143.627	145.337	137.716	149.806	148.413	146.181	143.802	150.274	152.56	154.204		145.159	5.32785	229
230	3378.01	2720.53	3780.87	3182.14	2890.46	3450.91	2776.95	3738.88	3198.07	3865.38	2689.96	3702.78	3349.64	2757.68	2289.01	3355.3	2369.87	2670.23	3856.76		148.751	141.853	146.551	135.491	145.332	146.798	137.773	148.192	134.962	143.536	145.078	137.419	149.829	148.75	145.341	144.596	149.936	152.376	153.881		145.076	5.32187	230
231	3375.78	2726.95	3784.66	3186.69	2888.92	3458.08	2771.97	3731.29	3208.44	3872.49	2701.37	3706.49	3334.89	2753.92	2292.63	3344.14	2372.83	2680.48	3853.41		148.653	142.188	146.698	135.685	145.254	147.103	137.526	147.891	135.4	143.8	145.694	137.556	149.169	148.547	145.571	144.115	150.123	152.96	153.747		145.141	5.26116	231
232	3372.56	2716.6	3785.7	3183.18	2894.97	3469.44	2790.76	3737.68	3194.63	3873.7	2685.39	3700.03	3352.28	2768.39	2295.05	3346.97	2377.48	2676.35	3859.02		148.511	141.648	146.738	135.535	145.558	147.586	138.458	148.145	134.817	143.845	144.832	137.317	149.947	149.327	145.724	144.237	150.417	152.725	153.971		145.228	5.39369	232
233	3374.97	2710.81	3775.44	3172.67	2895.98	3463.86	2776.93	3741.33	3201	3881.61	2694.62	3691.98	3351.5	2752.64	2291.22	3349.03	2376.92	2685.73	3862.18		148.618	141.346	146.341	135.088	145.609	147.349	137.772	148.289	135.086	144.139	145.329	137.018	149.912	148.477	145.481	144.326	150.382	153.26	154.097		145.154	5.49971	233
234	3380.77	2733.26	3790.81	3175.96	2904.96	3464.72	2779.25	3745.06	3196.67	3877.15	2693.68	3699.02	3350.94	2769.42	2302.47	3332.64	2370.65	2696.75	3874.35		148.873	142.517	146.936	135.228	146.06	147.385	137.887	148.437	134.904	143.973	145.279	137.279	149.887	149.382	146.195	143.62	149.985	153.889	154.582		145.384	5.58008	234
235	3379.33	2725.68	3797.17	3167.19	2895.76	3471.85	2776.44	3737.54	3185.93	3877.09	2708.02	3696.98	3341.26	2768.99	2282.48	3345.22	2372.29	2677.68	3872.67		148.809	142.122	147.183	134.854	145.598	147.688	137.748	148.139	134.45	143.971	146.052	137.203	149.454	149.36	144.927	144.162	150.089	152.801	154.515		145.217	5.57593	235
236	3391.32	2724.63	3797.49	3165.23	2900.56	3461.92	2777.02	3744.38	3171.49	3874.59	2701.23	3703.08	3346.93	2763.96	2287.45	3333.63	2382.36	2674.97	3868.17		149.337	142.067	147.195	134.771	145.839	147.266	137.777	148.41	133.841	143.878	145.686	137.43	149.708	149.088	145.242	143.662	150.726	152.646	154.336		145.205	5.6587	236
237	3379.91	2718.26	3796.87	3171.06	2895.29	3465.79	2775.88	3739.25	3188.69	3882.29	2700.71	3689.47	3341.17	2772.44	2297.81	3344.79	2380.92	2671.02	3876.35		148.835	141.735	147.171	135.019	145.574	147.431	137.72	148.207	134.567	144.164	145.658	136.925	149.45	149.546	145.9	144.143	150.635	152.42	154.662		145.251	5.59794	237
238	3375.09	2725.47	3787.61	3163.67	2913.97	3464.06	2769.88	3745.34	3182.21	3877.67	2688.76	3691.08	3350.51	2770.8	2300.22	3342.37	2368.88	2677.77	3859.7		148.623	142.111	146.812	134.704	146.514	147.357	137.422	148.448	134.293	143.992	145.014	136.984	149.867	149.457	146.053	144.039	149.873	152.806	153.998		145.177	5.61223	238
239	3381.11	2713.72	3797.29	3168.2	2897.32	3469.53	2790.68	3751.04	3179.86	3871.21	2695.22	3680.94	3364.95	2770.6	2300.71	3347.99	2381.27	2695.79	3874.47		148.888	141.498	147.188	134.897	145.677	147.59	138.454	148.674	134.194	143.752	145.362	136.608	150.514	149.447	146.084	144.281	150.657	153.834	154.587		145.378	5.79351	239
240	3381.33	2726.53	3800.92	3171.83	2887.9	3457.41	2791.02	3746.29	3174.57	3879.74	2699.6	3683.78	3343.02	2761.49	2284.34	3343.94	2372.02	2688.49	3871.56		148.897	142.166	147.328	135.052	145.203	147.074	138.471	148.486	133.971	144.069	145.598	136.713	149.533	148.955	145.045	144.107	150.071	153.418	154.471		145.191	5.62345	240
241	3379.34	2711.61	3795.98	3154.2	2909.33	3463.72	2780.78	3755.24	3187.73	3869.17	2703.8	3676.48	3340.55	2772.07	2301.07	3344.63	2365.83	2682.82	3872.09		148.81	141.388	147.137	134.301	146.28	147.343	137.963	148.84	134.526	143.676	145.824	136.442	149.422	149.525	146.107	144.136	149.68	153.094	154.492		145.21	5.72178	241
242	3379.66	2723.1	3795.04	3172.61	2910.62	3481.29	2784.84	3741.18	3183.38	3879.92	2694.55	3666.63	3338.94	2774.5	2305.97	3336.14	2378.45	2678.56	3886.28		148.824	141.988	147.1	135.085	146.345	148.09	138.164	148.283	134.342	144.076	145.326	136.077	149.35	149.657	146.418	143.77	150.479	152.851	155.059		145.331	5.73226	242
243	3375.34	2720.08	3792.37	3157.01	2907	3468.45	2782.55	3752.78	3174.88	3875.37	2702.02	3672.26	3343.97	2780.07	2309.57	3342.16	2378.31	2689.94	3871.87		148.633	141.83	146.997	134.421	146.163	147.544	138.051	148.743	133.984	143.907	145.729	136.286	149.575	149.957	146.647	144.03	150.47	153.5	154.483		145.313	5.83858	243
244	3376.5	2720.67	3802.07	3149.65	2904.29	3471.38	2782.26	3743.55	3170.35	3883.56	2691.05	3666.76	3349.87	2764.17	2289.33	3348.84	2389.65	2691.9	3871.85		148.685	141.86	147.373	134.108	146.027	147.668	138.036	148.377	133.793	144.211	145.137	136.082	149.839	149.1	145.361	144.318	151.187	153.612	154.483		145.224	5.91078	244
245	3373.89	2724.94	3806.91	3146.52	2914.59	3459.48	2770.16	3752.13	3179.55	3881.93	2701.52	3669.2	3353.07	2773.14	2299.59	3344.04	2381.1	2690.39	3876.35		148.57	142.083	147.56	133.974	146.545	147.162	137.436	148.717	134.181	144.15	145.702	136.172	149.982	149.583	146.012	144.111	150.646	153.526	154.662		145.304	5.92712	245
246	3376.79	2717.07	3814.48	3131.57	2896.77	3463.7	2780.7	3757.6	3174.87	3886.63	2686.21	3664.58	3358.99	2768.43	2311.44	3348.42	2389.16	2699.77	3877.81		148.698	141.673	147.854	133.338	145.649	147.342	137.959	148.934	133.983	144.325	144.876	136.001	150.247	149.329	146.765	144.3	151.156	154.061	154.721		145.327	6.09143	246
247	3374.26	2719.32	3806.27	3156.03	2902.07	3475.81	2787.91	3742.48	3172.11	3887.14	2705.51	3663.9	3350.6	2763.6	2294.97	3338.97	2382.35	2697.22	3865.31		148.586	141.79	147.535	134.379	145.915	147.857	138.317	148.335	133.867	144.344	145.917	135.976	149.872	149.069	145.72	143.892	150.725	153.916	154.222		145.275	5.85681	247
248	3378.29	2738.82	3803.89	3139.98	2901.29	3465.41	2771.93	3751.51	3170.59	3893.74	2699.13	3666.64	3365.95	2761.17	2305.48	3334.53	2384.68	2688.94	3881.36		148.764	142.807	147.443	133.696	145.876	147.414	137.524	148.692	133.803	144.589	145.573	136.077	150.558	148.938	146.387	143.701	150.873	153.443	154.862		145.317	6.00648	248
249	3384.55	2716.02	3817.74	3148.83	2909.64	3459.55	2779.57	3753.31	3186.8	3878.32	2696.53	3658.39	3351.32	2767.68	2311.99	3335.18	2381.85	2694.9	3880.22		149.039	141.618	147.98	134.072	146.296	147.165	137.903	148.764	134.487	144.016	145.432	135.771	149.904	149.289	146.8	143.729	150.694	153.783	154.817		145.345	5.95934	249
250	3380.22	2715.94	3810.6	3138.07	2908.44	3461.95	2775.13	3755.51	3175.2	3888.1	2693.22	3655.87	3358.02	2763.49	2309.43	3348.2	2379.7	2699.7	3877.79		148.848	141.614	147.703	133.614	146.236	147.267	137.683	148.851	133.997	144.38	145.254	135.678	150.203	149.063	146.637	144.29	150.557	154.057	154.72		145.298	6.06604	250
251	3397.07	2724.29	3805.13	3120.67	2900.73	3481.72	2781.64	3753.31	3172.53	3879.27	2683.36	3652.45	3350.43	2783.27	2312.77	3338.97	2388.96	2697.37	3876.28		149.591	142.049	147.491	132.873	145.848	148.108	138.006	148.764	133.885	144.052	144.722	135.551	149.864	150.13	146.85	143.893	151.144	153.925	154.66		145.337	6.21324	251
252	3382.83	2718.58	3806.96	3135.87	2906.58	3460.85	2772.42	3757.38	3171.21	3868.08	2706.22	3636.23	3352.24	2775.19	2311.25	3343.81	2387.3	2683.36	3879.73		148.964	141.751	147.563	133.521	146.142	147.221	137.548	148.925	133.829	143.636	145.955	134.949	149.945	149.694	146.753	144.101	151.038	153.125	154.797		145.235	6.14797	252
253	3378.35	2710.91	3810.12	3131.47	2890.63	3458.87	2773.29	3761.05	3166.05	3885.67	2689.94	3643.18	3344.53	2770.68	2301.09	3345.85	2395.04	2697.37	3878.25		148.766	141.352	147.685	133.333	145.34	147.136	137.591	149.071	133.611	144.289	145.077	135.206	149.6	149.451	146.108	144.189	151.528	153.924	154.738		145.158	6.20927	253
254	3381.01	2705.87	3816.11	3140	2903.04	3472.29	2769.64	3766.37	3175.4	3878.29	2691.25	3645.5	3349.62	2771.56	2298.66	3352.16	2389.08	2691.02	3880.12		148.883	141.089	147.917	133.696	145.964	147.707	137.41	149.282	134.006	144.015	145.148	135.293	149.828	149.498	145.954	144.461	151.151	153.562	154.812		145.246	6.14716	254
255	3378.11	2718.73	3806.32	3136.27	2904.11	3461.72	2776.01	3757.12	3172.3	3875.97	2686.73	3626.55	3353.94	2757.27	2304.38	3356.75	2389.06	2704.01	3878.76		148.756	141.76	147.537	133.538	146.018	147.258	137.726	148.915	133.875	143.929	144.904	134.59	150.021	148.728	146.317	144.659	151.15	154.303	154.758		145.197	6.19807	255
256	3385.85	2727.73	3820.03	3132.65	2899.59	3470.86	2772	3756.66	3154.01	3881.78	2693.91	3644.7	3345.45	2775.52	2316.41	3352.33	2392.81	2684.49	3876.65		149.096	142.229	148.069	133.384	145.791	147.646	137.527	148.897	133.103	144.145	145.291	135.263	149.641	149.712	147.081	144.468	151.387	153.19	154.674		145.294	6.21032	256
257	3382.94	2724.34	3813.71	3131.97	2897.31	3465.88	2783.97	3764.15	3160.24	3875.36	2702.88	3631.33	3352.88	2787.12	2295.04	3347.1	2389.54	2695.77	3885.23		148.968	142.052	147.824	133.355	145.676	147.434	138.121	149.193	133.366	143.906	145.775	134.767	149.974	150.338	145.724	144.243	151.18	153.833	155.017		145.302	6.2841	257
258	3378.67	2711.2	3814.49	3136.69	2900.13	3473.71	2777.39	3763.78	3158.42	3870.02	2696.84	3626.84	3356.23	2785.07	2302.36	3339.48	2391.79	2689.2	3874.59		148.78	141.367	147.854	133.556	145.818	147.767	137.795	149.179	133.289	143.708	145.449	134.6	150.124	150.227	146.189	143.914	151.322	153.458	154.592		145.21	6.28411	258
259	3376.94	2714.08	3816.81	3120.48	2903.15	3471.88	2779.6	3766.35	3157.08	3888.98	2696.01	3630.47	3355.4	2771.86	2304.87	3328.75	2405.06	2687.2	3886.41		148.704	141.517	147.944	132.866	145.97	147.69	137.905	149.281	133.233	144.412	145.404	134.735	150.086	149.514	146.348	143.452	152.162	153.344	155.064		145.244	6.38457	259
260	3381.72	2717.98	3810.81	3119.45	2895.17	3468.35	2767.16	3755.87	3160.02	3882.37	2704.36	3641.01	3360.71	2765.42	2299.15	3339.7	2393.97	2701.78	3884.91		148.914	141.72	147.711	132.821	145.568	147.539	137.288	148.865	133.357	144.167	145.855	135.126	150.324	149.167	145.985	143.924	151.461	154.176	155.004		145.209	6.36789	260
261	3386.11	2724.79	3816.39	3109.49	2895.3	3460.12	2787.31	3755.65	3156.95	3861.03	2697.05	3622.75	3341.47	2767.25	2308.6	3336.56	2403.54	2695.09	3882.75		149.108	142.075	147.928	132.398	145.575	147.189	138.287	148.857	133.227	143.374	145.461	134.449	149.463	149.266	146.585	143.789	152.066	153.795	154.918		145.148	6.39892	261
262	3378.46	2717.62	3811.08	3118	2890.28	3466.52	2777.24	3765.94	3148.47	3879.86	2701.6	3634.27	3358.85	2766.44	2312.29	3342.72	2394.45	2683.76	3880.75		148.771	141.702	147.722	132.76	145.323	147.462	137.788	149.265	132.869	144.074	145.706	134.876	150.241	149.222	146.819	144.054	151.491	153.147	154.838		145.165	6.34114	262
263	3381.88	2712.26	3813.8	3104.82	2908.6	3469.18	2768.31	3765.01	3155.12	3885.4	2689.65	3625.31	3356.82	2772.94	2305.7	3338.56	2396.32	2690.16	3888.94		148.922	141.422	147.827	132.199	146.244	147.575	137.345	149.228	133.15	144.279	145.061	134.544	150.15	149.573	146.401	143.875	151.609	153.513	155.164		145.162	6.50754	263
264	3384.45	2707.26	3816.97	3124.96	2898.61	3469.41	2779.46	3770.49	3150.24	3892.56	2701.06	3615.39	3351.44	2760.5	2309.82	3322.74	2390.57	2687.35	3876.24		149.035	141.161	147.95	133.056	145.741	147.585	137.898	149.445	132.944	144.545	145.677	134.175	149.909	148.901	146.662	143.193	151.245	153.353	154.658		145.112	6.36663	264
265	3369.46	2711.63	3822.99	3111.83	2894.72	3473.99	2772.46	3767.73	3156.14	3890.1	2700.58	3611.51	3365.46	2762.41	2309.94	3321.55	2392.07	2684.86	3869.7		148.375	141.389	148.184	132.497	145.546	147.78	137.55	149.336	133.193	144.454	145.651	134.031	150.536	149.005	146.67	143.142	151.34	153.211	154.397		145.068	6.41715	265
266	3366.19	2712.63	3816.54	3110.09	2885.27	3470.77	2776.33	3769.54	3146.22	3884.66	2698.89	3614.95	3362.16	2762.91	2309.38	3326.33	2391.62	2690.91	3905.93		148.231	141.441	147.934	132.423	145.07	147.643	137.742	149.407	132.774	144.252	145.56	134.159	150.389	149.031	146.634	143.348	151.312	153.556	155.842		145.092	6.56134	266
267	3363.96	2719.28	3827.83	3109.3	2893.47	3468.15	2780.28	3768.75	3156.29	3881.14	2698.83	3617.01	3358.19	2778.16	2299.06	3339.48	2386.35	2685.03	3891.95		148.133	141.788	148.371	132.39	145.483	147.531	137.938	149.376	133.199	144.121	145.556	134.236	150.211	149.854	145.979	143.914	150.978	153.22	155.285		145.135	6.4235	267
268	3374.54	2707.73	3820.21	3107.87	2900.83	3474.92	2771.01	3763.28	3146.93	3882.19	2700.33	3610.19	3357.03	2779.03	2313.6	3335.71	2395.64	2683.18	3883		148.598	141.186	148.076	132.329	145.853	147.819	137.478	149.159	132.805	144.16	145.637	133.982	150.159	149.901	146.903	143.752	151.566	153.115	154.928		145.127	6.54674	268
269	3367.72	2706.97	3821.02	3108.75	2896.13	3468.93	2766.27	3770.48	3149.12	3885.58	2697.12	3609.12	3359.25	2773.74	2320.87	3330.13	2403.26	2693.3	3897.6		148.298	141.146	148.107	132.366	145.617	147.564	137.243	149.444	132.897	144.286	145.464	133.943	150.259	149.616	147.364	143.511	152.048	153.692	155.51		145.178	6.66173	269
270	3364.98	2707.36	3820.16	3097.07	2897.75	3471.12	2766.31	3766.98	3135.64	3876.07	2691.94	3602.99	3367.07	2784.49	2327.84	3353.11	2385.1	2685.25	3886.07		148.177	141.167	148.074	131.869	145.698	147.657	137.245	149.306	132.328	143.933	145.185	133.715	150.608	150.195	147.806	144.502	150.899	153.233	155.05		145.087	6.69648	270
271	3365.34	2712.1	3817.49	3100.86	2905.63	3462.6	2765.84	3762.45	3150.38	3878.87	2691.47	3607.14	3361.97	2768.38	2314.08	3339.25	2373.21	2698.39	3873.59		148.193	141.413	147.971	132.03	146.094	147.295	137.222	149.126	132.95	144.037	145.16	133.869	150.38	149.327	146.933	143.905	150.147	153.983	154.552		144.978	6.50974	271
272	3361.34	2713.04	3816.43	3110.61	2893.88	3467.85	2767.37	3753.21	3140.94	3890.01	2695.32	3599.13	3353.82	2787.8	2312.11	3322.87	2394.23	2692.3	3866.78		148.017	141.463	147.929	132.445	145.503	147.518	137.298	148.76	132.552	144.451	145.367	133.572	150.016	150.374	146.807	143.198	151.477	153.635	154.281		144.982	6.55763	272
273	3362.18	2703.09	3808.54	3104.01	2892.99	3480.42	2775.24	3765.33	3158.96	3886.68	2695.68	3610.95	3355.46	2779.35	2312.03	3336.9	2391.41	2689.56	3884.98		148.054	140.944	147.623	132.164	145.459	148.053	137.688	149.24	133.312	144.327	145.387	134.01	150.089	149.918	146.803	143.803	151.299	153.478	155.006		145.087	6.49975	273
274	3355.56	2715.54	3817.86	3082.48	2897.52	3479.73	2781.9	3769.76	3149.47	3891.89	2702.4	3587.02	3357.59	2786.6	2296.66	3329.96	2394.38	2701.83	3874.04		147.763	141.593	147.985	131.248	145.687	148.024	138.019	149.416	132.911	144.52	145.749	133.122	150.184	150.309	145.827	143.504	151.487	154.179	154.57		145.058	6.72378	274
275	3364.46	2709.59	3817.95	3100.53	2892.28	3468.86	2775.47	3767.61	3127.92	3886.03	2682.51	3582.57	3357.95	2769.63	2332.03	3331.53	2383.09	2706.2	3880.44		148.155	141.283	147.988	132.016	145.423	147.561	137.7	149.331	132.002	144.302	144.677	132.957	150.2	149.394	148.072	143.572	150.772	154.428	154.825		144.982	6.7715	275
276	3362.96	2711.47	3817.49	3083.65	2882.7	3470.79	2781.75	3776.31	3127.13	3891.41	2688.8	3576.24	3350.69	2782.93	2326.59	3334.35	2382.65	2695.48	3883.1		148.088	141.381	147.971	131.297	144.942	147.643	138.011	149.676	131.969	144.502	145.016	132.722	149.876	150.112	147.727	143.693	150.744	153.817	154.932		144.954	6.8291	276
277	3368.35	2709.07	3831.01	3082.88	2890.49	3481.05	2764.29	3761.6	3149.37	3892.47	2698.96	3589.02	3349.49	2777.88	2310.56	3326.84	2369.93	2701.12	3873.25		148.326	141.255	148.495	131.264	145.333	148.08	137.145	149.092	132.907	144.542	145.564	133.197	149.822	149.839	146.71	143.37	149.939	154.138	154.539		144.924	6.69293	277
278	3363.12	2702.42	3820.53	3082.35	2891.39	3478.59	2783.39	3776.65	3143.12	3884.21	2693.91	3570.3	3352.89	2780.84	2319.37	3325.34	2385.79	2703.87	3874.06		148.096	140.909	148.088	131.242	145.378	147.975	138.093	149.689	132.644	144.235	145.291	132.502	149.974	149.999	147.269	143.305	150.943	154.295	154.571		144.974	6.82276	278
279	3379.74	2705.53	3826.87	3079.08	2889.2	3478.79	2765.03	3760.27	3131.24	3895.64	2704.1	3566.99	3359.59	2774.52	2324.31	3339.5	2393.12	2702.74	3866.32		148.827	141.071	148.334	131.103	145.268	147.984	137.182	149.04	132.142	144.66	145.841	132.379	150.274	149.658	147.583	143.915	151.407	154.231	154.262		145.008	6.94175	279
280	3363.08	2706.15	3826.58	3090.34	2892.09	3473.75	2767.53	3759.72	3140.57	3898.75	2694.43	3573.81	3357.13	2781.49	2331.79	3331.75	2390.56	2704.94	3876.27		148.094	141.103	148.323	131.582	145.413	147.769	137.306	149.018	132.536	144.775	145.319	132.632	150.164	150.034	148.058	143.581	151.245	154.357	154.659		145.051	6.84659	280
281	3362.54	2690.54	3826.62	3080.46	2896.88	3475.61	2783.45	3768.33	3146.39	3882.47	2687.29	3573.04	3352.68	2778.32	2320.18	3332.06	2384.85	2704.62	3877.33		148.07	140.29	148.325	131.162	145.654	147.848	138.096	149.359	132.782	144.17	144.934	132.604	149.965	149.863	147.32	143.595	150.883	154.338	154.701		144.945	6.82318	281
282	3364.62	2700.21	3823.32	3070.93	2881.4	3471.82	2770.6	3769.45	3134.56	3885.39	2692.93	3562.44	3347.99	2781.3	2314.74	3322.66	2381.69	2704.86	3881.33		148.162	140.794	148.196	130.756	144.876	147.687	137.458	149.404	132.282	144.279	145.238	132.21	149.755	150.023	146.975	143.189	150.684	154.352	154.861		144.799	6.96404	282
283	3362.68	2716.29	3818.33	3072.91	2889.45	3474.36	2769.18	3753.55	3130.45	3892.2	2697.91	3568	3354.02	2777.51	2323.52	3318.16	2386.04	2696.12	3877.07		148.076	141.632	148.003	130.84	145.281	147.795	137.388	148.773	132.109	144.532	145.507	132.416	150.025	149.819	147.532	142.995	150.959	153.853	154.691		144.854	6.88897	283
284	3366.32	2699.77	3811.4	3070.24	2888.64	3462.72	2766.28	3773.29	3141.2	3881.5	2698.35	3559.93	3357.14	2770.35	2308.32	3328.26	2376.6	2690.58	3879.97		148.236	140.771	147.735	130.726	145.24	147.3	137.244	149.556	132.563	144.134	145.531	132.117	150.164	149.433	146.567	143.431	150.361	153.537	154.807		144.708	6.86314	284
285	3368.47	2700.25	3810.54	3078.69	2883.54	3466.84	2769.94	3768.05	3140.74	3870.31	2690.59	3564.5	3350.75	2778.12	2318.85	3336.44	2382.79	2693.22	3879.05		148.331	140.796	147.701	131.086	144.984	147.475	137.425	149.348	132.543	143.719	145.112	132.287	149.878	149.852	147.235	143.783	150.753	153.688	154.77		144.777	6.83425	285
286	3352.91	2709.28	3821.26	3062.99	2891.89	3465.4	2758.7	3775	3137.84	3878.45	2692.19	3553.03	3349.45	2774.78	2327.98	3335.43	2394.41	2709.52	3875.74		147.646	141.267	148.117	130.418	145.403	147.414	136.868	149.624	132.421	144.021	145.198	131.861	149.82	149.672	147.816	143.74	151.488	154.618	154.638		144.845	7.0721	286
287	3362.92	2693.98	3832.13	3060.34	2893.11	3454.05	2781.78	3772.99	3132.09	3875.99	2676.74	3542.25	3344.56	2768.25	2318.8	3334.92	2393.51	2700.07	3880.21		148.087	140.469	148.538	130.305	145.465	146.931	138.013	149.544	132.178	143.93	144.365	131.461	149.601	149.32	147.233	143.718	151.432	154.079	154.816		144.71	7.05693	287
288	3353.98	2690.39	3830.88	3059.1	2880.87	3467.79	2767.43	3771.96	3128.31	3875.63	2676.96	3552.62	3364.21	2779.28	2309.31	3327.27	2389.46	2707.58	3879.23		147.693	140.282	148.489	130.252	144.849	147.516	137.301	149.503	132.019	143.916	144.377	131.846	150.48	149.915	146.63	143.388	151.175	154.507	154.777		144.68	7.14442	288
289	3361.17	2686.93	3817.31	3059.15	2886.01	3470.75	2772.5	3773.18	3123.93	3883.96	2669.41	3545.56	3351.04	2787.19	2322.7	3326.72	2393.72	2714.27	3870.42		148.01	140.101	147.963	130.254	145.108	147.642	137.553	149.551	131.834	144.226	143.97	131.584	149.891	150.341	147.48	143.364	151.444	154.889	154.426		144.717	7.20149	289
290	3353.75	2707.62	3813.84	3059.9	2897.97	3471.39	2764.98	3770.49	3138.12	3890.65	2683.02	3541.06	3349.8	2782.35	2305.65	3328.3	2377.73	2696.52	3870.27		147.683	141.18	147.829	130.286	145.709	147.669	137.179	149.445	132.433	144.474	144.704	131.417	149.836	150.08	146.397	143.433	150.433	153.876	154.42		144.657	6.98133	290
291	3338.74	2696.98	3821.8	3058.78	2886.35	3470.68	2763.29	3775.28	3138.94	3883.96	2692.64	3536.83	3360.15	2781.09	2330.04	3340.7	2383.18	2708.63	3879.44		147.022	140.625	148.138	130.238	145.125	147.639	137.095	149.635	132.467	144.226	145.223	131.26	150.299	150.012	147.946	143.967	150.778	154.567	154.785		144.792	7.14962	291
292	3361.49	2696.76	3815.71	3061.44	2893.02	3468.16	2763.15	3770.4	3136.23	3881.22	2684.69	3528.3	3354.02	2788.33	2307.31	3311.7	2374.43	2699.77	3873.93		148.024	140.614	147.902	130.352	145.46	147.532	137.089	149.441	132.353	144.124	144.794	130.943	150.025	150.403	146.503	142.717	150.224	154.062	154.566		144.586	7.10152	292
293	3350.26	2701.19	3816.12	3052.12	2894.32	3475.46	2778.75	3776.74	3124.5	3893.96	2694.73	3538.95	3358.76	2771.41	2324.67	3335.32	2393.98	2698.76	3877.3		147.529	140.845	147.917	129.955	145.526	147.842	137.863	149.693	131.858	144.597	145.335	131.339	150.237	149.49	147.605	143.735	151.461	154.004	154.7		144.817	7.15147	293
294	3349.66	2705.25	3815.56	3047.66	2880.05	3468.92	2755.47	3761.46	3124.37	3871.05	2673.43	3531.73	3364.06	2774.45	2309.72	3320.62	2382.11	2694.88	3875.08		147.503	141.056	147.896	129.765	144.808	147.564	136.707	149.087	131.852	143.746	144.187	131.07	150.474	149.654	146.656	143.102	150.71	153.782	154.611		144.433	7.17267	294
295	3344.78	2686.83	3823.6	3046.4	2886.21	3466.9	2770.94	3786.21	3133.68	3868.91	2675.59	3525.52	3350.85	2769.48	2310.05	3321.72	2397.36	2691.57	3866.18		147.288	140.096	148.207	129.711	145.118	147.478	137.475	150.068	132.245	143.667	144.303	130.84	149.883	149.386	146.677	143.149	151.675	153.594	154.256		144.48	7.16531	295
296	3327.41	2699.57	3813.61	3047.67	2878.84	3468.57	2767.53	3769.1	3115.42	3875.04	2678.14	3531.76	3345.61	2793.96	2316.63	3328.27	2384.16	2691.82	3880.08		146.523	140.76	147.82	129.765	144.747	147.549	137.306	149.39	131.475	143.894	144.441	131.072	149.648	150.707	147.095	143.431	150.84	153.607	154.811		144.467	7.1962	296
297	3353.16	2690.33	3804.24	3044.96	2880.44	3451.02	2763.66	3764.01	3121.22	3875.63	2691.32	3512.79	3335.73	2798.67	2319.27	3313.99	2383.26	2688.4	3877.67		147.657	140.279	147.457	129.65	144.828	146.803	137.114	149.188	131.719	143.916	145.151	130.368	149.206	150.96	147.263	142.816	150.783	153.412	154.715		144.383	7.25543	297
298	3354.95	2685.58	3818.31	3048.68	2883.84	3468.92	2763.51	3767.02	3114.59	3886.05	2702.85	3522.08	3355.16	2775.87	2307.71	3329.88	2386.61	2705.29	3865.22		147.736	140.031	148.002	129.808	144.999	147.564	137.107	149.308	131.439	144.303	145.773	130.712	150.075	149.73	146.529	143.501	150.995	154.376	154.218		144.537	7.2765	298
299	3352.32	2695.01	3815.07	3033.73	2868.83	3464.91	2765.35	3771.42	3135.77	3885.97	2682.61	3515.16	3353.21	2777.59	2325.66	3319.26	2386.57	2696.88	3874.11		147.62	140.522	147.877	129.172	144.244	147.393	137.197	149.482	132.333	144.3	144.682	130.455	149.988	149.823	147.668	143.043	150.992	153.896	154.573		144.487	7.27784	299
300	3333.19	2685.7	3801.68	3036.4	2866.84	3465.49	2759.27	3775.79	3118.97	3874.74	2683.46	3508.69	3342.27	2768.84	2319.99	3326.58	2385.53	2702.74	3861.67		146.777	140.037	147.358	129.285	144.144	147.418	136.896	149.655	131.624	143.883	144.728	130.215	149.499	149.351	147.308	143.358	150.926	154.231	154.077		144.251	7.2992	300
301	3334.04	2688.39	3821.08	3034.52	2875.03	3458.89	2764.83	3774.05	3120.63	3880.5	2683.1	3521.15	3334.19	2782.14	2310.05	3325.37	2394.92	2703.95	3869.59		146.815	140.178	148.11	129.206	144.556	147.137	137.172	149.586	131.695	144.097	144.708	130.678	149.138	150.069	146.677	143.307	151.521	154.3	154.393		144.386	7.30676	301
302	3345.89	2691.78	3819.73	3039.91	2874.5	3466.54	2762.47	3773.92	3125.65	3874.86	2681.4	3514.71	3344.05	2781.41	2311.64	3308.31	2389.73	2677.88	3877.17		147.337	140.354	148.057	129.435	144.529	147.463	137.055	149.581	131.906	143.888	144.617	130.439	149.579	150.03	146.778	142.571	151.192	152.812	154.695		144.333	7.23342	302
303	3334.26	2695.06	3814.77	3032.75	2862.67	3462.34	2772.34	3774.66	3119.47	3876.34	2679.11	3504.53	3353.41	2763.5	2324.23	3312.05	2389.93	2695.15	3867.8		146.825	140.525	147.865	129.13	143.934	147.284	137.544	149.61	131.645	143.943	144.493	130.061	149.997	149.063	147.578	142.732	151.205	153.798	154.321		144.292	7.31277	303
304	3332.41	2687.09	3825.46	3032.56	2880.37	3456.08	2761.8	3765.89	3107.72	3870.07	2672.22	3504.31	3351.16	2784.28	2319.49	3318.65	2378.69	2696.47	3867.55		146.743	140.11	148.279	129.122	144.824	147.018	137.021	149.263	131.149	143.71	144.121	130.053	149.897	150.184	147.276	143.017	150.494	153.873	154.311		144.235	7.39097	304
305	3328.05	2695.93	3819.11	3013.56	2867.28	3469.85	2753.51	3768.23	3116.79	3869.9	2670.34	3499.62	3343.58	2779.16	2325.44	3318.29	2382.87	2685.11	3878.28		146.551	140.571	148.033	128.313	144.166	147.604	136.61	149.355	131.532	143.704	144.02	129.879	149.557	149.908	147.654	143.001	150.758	153.225	154.739		144.167	7.46068	305
306	3325.93	2692.71	3814.51	3033.86	2865.3	3471.04	2765.18	3772.17	3110.6	3874.99	2670.44	3502.68	3355.32	2779.66	2324.84	3318.88	2389.63	2678.87	3867.82		146.458	140.403	147.855	129.177	144.067	147.654	137.189	149.512	131.271	143.893	144.025	129.992	150.083	149.935	147.616	143.027	151.186	152.869	154.322		144.239	7.341	306
307	3339.76	2685.85	3827.36	3030.1	2866.98	3453.2	2767.22	3778.69	3108.13	3883.78	2688.21	3498.49	3353.38	2766.22	2311.16	3307.44	2374.12	2677.2	3871.73		147.067	140.045	148.353	129.017	144.151	146.895	137.29	149.77	131.167	144.219	144.984	129.837	149.996	149.21	146.747	142.533	150.204	152.773	154.478		144.144	7.32389	307
308	3329.89	2677.43	3819.61	3022.53	2871.47	3475.95	2760.23	3772.67	3110.81	3877.54	2684.25	3501.41	3346.41	2790.99	2313.76	3305.93	2392.41	2696.58	3874.14		146.632	139.606	148.053	128.695	144.376	147.863	136.944	149.531	131.28	143.987	144.77	129.945	149.684	150.546	146.912	142.468	151.362	153.879	154.574		144.269	7.54112	308
309	3328.66	2683.67	3815.75	3032.51	2867.02	3467.45	2761.47	3782.69	3113.42	3879.88	2690.96	3497.18	3347.2	2756.8	2329.78	3320.24	2383.73	2702	3861.5		146.578	139.931	147.903	129.12	144.153	147.501	137.005	149.928	131.39	144.074	145.132	129.788	149.72	148.702	147.93	143.085	150.813	154.189	154.07		144.264	7.39799	309
310	3332.63	2688.64	3818.77	3027.04	2866.69	3466.24	2760.38	3754.54	3115.77	3862.11	2682.24	3492.55	3344.95	2768.9	2318.9	3308.92	2388.42	2689.47	3869.79		146.753	140.191	148.02	128.887	144.136	147.45	136.951	148.813	131.489	143.415	144.662	129.616	149.619	149.355	147.239	142.597	151.109	153.474	154.401		144.114	7.38606	310
311	3330.56	2679.24	3829.57	3019.7	2872.06	3451.05	2755.93	3762.79	3113.98	3874.74	2694.61	3500.26	3351.58	2762.52	2320.33	3319.83	2384.4	2685.57	3851.56		146.662	139.7	148.439	128.574	144.406	146.804	136.73	149.14	131.414	143.883	145.329	129.903	149.916	149.011	147.33	143.068	150.855	153.251	153.673		144.11	7.35354	311
312	3326.08	2690.76	3823.07	3015.96	2861.64	3458.05	2766.7	3772.45	3119.72	3880.48	2692.62	3473.22	3339.26	2768.98	2315.61	3315.69	2385.35	2693.35	3857.43		146.464	140.301	148.187	128.415	143.883	147.102	137.265	149.523	131.656	144.096	145.221	128.899	149.364	149.359	147.03	142.889	150.915	153.695	153.907		144.114	7.45234	312
313	3328.65	2675.13	3812.04	3023	2862.9	3460.41	2748.37	3772.18	3109.68	3883.47	2685.63	3477.15	3336.36	2779.35	2332.31	3316.98	2378.64	2694.58	3859.65		146.578	139.486	147.759	128.715	143.946	147.202	136.355	149.512	131.232	144.208	144.845	129.045	149.234	149.918	148.09	142.945	150.49	153.765	153.996		144.07	7.53538	313
314	3328.82	2679.21	3809.55	3010.47	2864.92	3460.56	2758.86	3764.34	3112.76	3891.17	2680.12	3478.01	3346.84	2775.98	2325.7	3306.48	2376.98	2693.44	3859.88		146.585	139.699	147.663	128.181	144.047	147.208	136.876	149.201	131.362	144.493	144.547	129.077	149.704	149.737	147.671	142.492	150.386	153.7	154.005		144.033	7.52549	314
315	3331.7	2695.69	3806.06	3023.92	2856.6	3464.98	2760.85	3760.67	3110.77	3868.42	2667.09	3477.46	3345.45	2773.29	2329.54	3311.56	2379.4	2677.32	3851.92		146.712	140.558	147.527	128.754	143.629	147.396	136.975	149.056	131.278	143.649	143.844	129.056	149.641	149.592	147.914	142.711	150.538	152.78	153.688		143.963	7.36176	315
316	3330.19	2685.5	3813.14	3018.75	2862.07	3456.75	2755.29	3763.34	3109.45	3878.42	2684.24	3467.43	3364.66	2759.69	2310.34	3299.69	2380.44	2691.56	3865.9		146.646	140.027	147.802	128.534	143.904	147.046	136.698	149.161	131.223	144.02	144.769	128.684	150.5	148.858	146.695	142.2	150.604	153.593	154.245		143.958	7.54298	316
317	3325.17	2672.6	3802.98	3005.16	2856.05	3455.67	2759.19	3768.9	3098.17	3876.99	2671	3468.96	3342.7	2785.09	2325.14	3301.91	2372.6	2692.11	3859.13		146.424	139.354	147.408	127.955	143.602	147	136.892	149.382	130.747	143.967	144.055	128.741	149.518	150.228	147.635	142.295	150.109	153.624	153.975		143.837	7.6363	317
318	3328.01	2671.14	3813.36	3011.63	2858.1	3453.55	2757.61	3773.15	3104.27	3868.35	2688.68	3486.95	3342.07	2774.88	2329.16	3309.82	2388.57	2681.69	3851.52		146.549	139.278	147.81	128.231	143.705	146.91	136.813	149.55	131.004	143.646	145.009	129.409	149.49	149.677	147.89	142.636	151.119	153.029	153.672		143.97	7.50799	318
319	3315.19	2673.57	3805.66	3022.23	2865.48	3457.37	2755.09	3765.65	3102.77	3862.77	2669.39	3464.19	3339.76	2782.1	2320.93	3301.52	2378.33	2679.23	3860.77		145.985	139.404	147.512	128.682	144.076	147.072	136.689	149.253	130.941	143.439	143.968	128.564	149.387	150.067	147.368	142.279	150.471	152.889	154.04		143.794	7.51376	319
320	3327.92	2677.24	3821.21	3005.6	2861.6	3459.76	2753.48	3761.13	3099.01	3873.89	2682.09	3464.46	3348.61	2785.63	2327.06	3301.24	2379.77	2674.82	3846.14		146.546	139.596	148.115	127.974	143.881	147.174	136.609	149.074	130.782	143.852	144.654	128.574	149.783	150.257	147.757	142.267	150.562	152.638	153.457		143.871	7.60792	320
321	3312.65	2678.91	3816.3	3006.4	2857.57	3454.03	2761.22	3770.94	3102.4	3868.54	2659.76	3454.85	3348.74	2767.83	2343.71	3308.95	2381.25	2687.04	3860.28		145.873	139.683	147.925	128.008	143.678	146.93	136.993	149.463	130.925	143.653	143.449	128.217	149.788	149.297	148.814	142.599	150.656	153.335	154.021		143.858	7.67624	321
322	3319.24	2669.94	3814.35	3010.1	2851.86	3456.26	2752.81	3769.14	3100.39	3869.54	2664.84	3455.63	3342.75	2781.63	2326.81	3304.11	2369.88	2690.18	3850.79		146.163	139.215	147.849	128.166	143.391	147.025	136.576	149.391	130.84	143.69	143.723	128.246	149.52	150.041	147.741	142.39	149.937	153.514	153.642		143.74	7.64121	322
323	3304.94	2678.27	3814.28	2998.04	2860.69	3460.29	2765.96	3762.41	3111.54	3857.4	2655.43	3459.23	3342.3	2772.18	2322.23	3298.21	2380.92	2680.83	3842.95		145.534	139.65	147.846	127.652	143.835	147.197	137.228	149.124	131.311	143.239	143.216	128.38	149.5	149.531	147.45	142.136	150.635	152.98	153.33		143.672	7.53163	323
324	3306.83	2682.76	3806.61	3000.19	2852.13	3453.05	2771.56	3763.44	3098.66	3867.64	2681.47	3454.72	3348.11	2768.62	2325.79	3305.26	2380.82	2684.72	3855.93		145.617	139.884	147.549	127.744	143.404	146.889	137.506	149.166	130.767	143.62	144.62	128.212	149.76	149.34	147.676	142.44	150.628	153.203	153.847		143.783	7.61298	324
325	3311.36	2677.95	3807.06	3002.54	2843.29	3453.98	2748.73	3759.54	3098.3	3866.9	2666.99	3439.01	3341.16	2765.2	2319.23	3307.03	2386.12	2682.27	3848.9		145.816	139.633	147.566	127.844	142.96	146.928	136.373	149.011	130.752	143.592	143.839	127.63	149.449	149.155	147.26	142.516	150.964	153.063	153.567		143.575	7.67962	325
326	3316.07	2672.65	3812.38	3001.81	2855.23	3458.78	2755.8	3759.56	3095.55	3871.81	2675.43	3437.83	3332.26	2768.47	2322.57	3293.22	2367.89	2674.78	3847.08		146.024	139.357	147.772	127.813	143.56	147.132	136.724	149.012	130.636	143.775	144.295	127.585	149.051	149.331	147.472	141.921	149.81	152.636	153.494		143.547	7.6194	326
327	3317.19	2668.97	3808.52	2994.65	2857.09	3456.61	2765.69	3761.43	3097.67	3855.62	2654.16	3437.54	3338.53	2776.32	2333.29	3285.12	2385.01	2678.19	3856.83		146.073	139.165	147.623	127.508	143.654	147.04	137.214	149.086	130.726	143.173	143.147	127.575	149.332	149.755	148.153	141.572	150.893	152.83	153.883		143.6	7.76733	327
328	3307.96	2670.12	3805.21	2991.96	2850.87	3444.7	2746.89	3770.04	3100.17	3859.98	2675.46	3444.16	3329.92	2772.76	2329.21	3304.6	2377.18	2674.11	3846.64		145.667	139.225	147.495	127.393	143.341	146.533	136.282	149.427	130.831	143.335	144.296	127.821	148.946	149.563	147.894	142.411	150.398	152.597	153.477		143.523	7.67293	328
329	3305.35	2669.36	3811.79	2988.84	2848.31	3457.07	2751.13	3766.79	3088.59	3859.79	2671.39	3436.66	3331.92	2764.85	2326.98	3303.03	2370.44	2684.15	3847.27		145.552	139.185	147.749	127.26	143.212	147.06	136.492	149.298	130.342	143.328	144.076	127.542	149.036	149.136	147.752	142.344	149.971	153.17	153.502		143.474	7.76451	329
330	3306.9	2671.46	3790.94	2988.77	2851.96	3465.29	2743.31	3773.38	3091.07	3864.43	2664.56	3436.28	3333.9	2766.39	2320.55	3287.94	2373.49	2679.83	3848.4		145.62	139.295	146.941	127.257	143.395	147.409	136.104	149.56	130.447	143.501	143.708	127.528	149.125	149.219	147.344	141.694	150.165	152.923	153.547		143.41	7.76792	330
331	3314.93	2666.31	3810.63	2997.38	2858.03	3454.56	2735.39	3764.93	3099.2	3866.91	2666.28	3436.28	3336.06	2768.9	2341.23	3300.63	2361.52	2674.01	3837.18		145.974	139.026	147.705	127.624	143.701	146.953	135.711	149.224	130.79	143.593	143.801	127.528	149.221	149.355	148.657	142.24	149.407	152.592	153.099		143.484	7.68759	331
332	3298.7	2665.63	3807.52	2977.22	2853.42	3448.11	2755.66	3763.02	3095.64	3859.72	2672.37	3430.93	3333.19	2756.78	2326.65	3301.41	2375.97	2686.33	3840.66		145.259	138.991	147.584	126.766	143.469	146.678	136.717	149.149	130.64	143.326	144.129	127.33	149.093	148.701	147.731	142.274	150.321	153.294	153.238		143.405	7.7809	332
333	3304.6	2670.41	3809.36	2978.68	2853.76	3457.55	2745.5	3761.27	3090.42	3858.69	2665.09	3417.59	3344.52	2764.03	2330.27	3297.98	2370.28	2678.94	3847.44		145.519	139.24	147.656	126.828	143.486	147.08	136.213	149.079	130.419	143.288	143.737	126.834	149.6	149.092	147.961	142.126	149.962	152.873	153.509		143.395	7.89162	333
334	3317.34	2666.82	3794.44	2984.17	2849.24	3446.76	2749.79	3758.43	3098.4	3856.53	2675.43	3439.95	3343.09	2772.32	2320.94	3303.12	2378.84	2694.49	3847.28		146.08	139.053	147.077	127.062	143.259	146.621	136.426	148.967	130.756	143.207	144.294	127.664	149.535	149.539	147.368	142.348	150.503	153.76	153.502		143.528	7.80214	334
335	3295.87	2665.01	3805.99	2984.77	2848.63	3455.44	2750.94	3763.12	3084.57	3849.04	2674.46	3429.72	3347.15	2757.86	2330.81	3295.62	2360	2682.31	3848.02		145.134	138.958	147.525	127.087	143.228	146.991	136.483	149.153	130.173	142.929	144.242	127.285	149.717	148.759	147.995	142.024	149.311	153.065	153.532		143.347	7.80654	335
336	3301.78	2662.76	3810.74	2974.77	2852.79	3453.89	2749.03	3770.04	3092.49	3852.53	2682.01	3419.08	3337.58	2760.33	2334	3294.12	2363.86	2682.74	3842.09		145.394	138.841	147.709	126.662	143.437	146.925	136.388	149.427	130.507	143.058	144.649	126.89	149.289	148.892	148.198	141.96	149.555	153.089	153.295		143.377	7.88588	336
337	3298.85	2669.43	3802.95	2982.18	2851.12	3451.75	2741.29	3765.11	3085.89	3861.95	2665.09	3412.26	3350.62	2766.69	2324.74	3289.84	2384.83	2682.66	3845.9		145.265	139.189	147.407	126.977	143.354	146.833	136.004	149.232	130.228	143.408	143.737	126.637	149.873	149.235	147.61	141.775	150.882	153.085	153.447		143.378	7.97733	337
338	3294.21	2679.25	3796.27	2968.64	2852.1	3445.5	2748.88	3761.69	3087.58	3855.76	2664.05	3409.18	3334.77	2772.45	2333.61	3278.36	2371.94	2664.32	3844.83		145.061	139.701	147.148	126.4	143.403	146.568	136.38	149.096	130.3	143.178	143.681	126.522	149.164	149.546	148.173	141.281	150.067	152.038	153.405		143.216	7.89609	338
339	3283.8	2665.6	3811.59	2977.29	2856.77	3450.94	2751.11	3758.36	3087.76	3855.29	2660.46	3408.77	3337.52	2771.68	2323.54	3281.55	2374.46	2677.25	3838.27		144.603	138.989	147.742	126.769	143.637	146.799	136.491	148.964	130.307	143.161	143.487	126.507	149.286	149.505	147.534	141.418	150.226	152.776	153.143		143.229	7.89842	339
340	3302.72	2655.8	3803.65	2968.63	2852.3	3447.07	2749.91	3758.12	3077.32	3852.41	2660.31	3409.3	3335.01	2766.98	2313.52	3272.35	2377.65	2688.91	3839.93		145.436	138.478	147.434	126.4	143.413	146.635	136.432	148.955	129.867	143.054	143.479	126.527	149.174	149.251	146.897	141.021	150.428	153.442	153.209		143.133	8.01986	340
341	3296.3	2655.08	3805.69	2967.29	2844.38	3433.8	2744.66	3757.69	3088.56	3844.1	2672.62	3410.32	3347.39	2769.72	2322.29	3294.33	2368.04	2670.32	3851.37		145.153	138.441	147.513	126.343	143.015	146.07	136.171	148.938	130.341	142.746	144.143	126.565	149.728	149.399	147.454	141.969	149.82	152.381	153.666		143.15	7.95134	341
342	3277.62	2663.79	3809.05	2966.57	2845.53	3442.31	2748.52	3751.84	3084.89	3866.11	2669.1	3394.89	3332.19	2775.41	2305.89	3285.5	2363.88	2678.99	3835.78		144.331	138.895	147.643	126.312	143.073	146.432	136.363	148.706	130.186	143.563	143.953	125.992	149.048	149.706	146.413	141.588	149.556	152.875	153.044		143.036	7.94156	342
343	3292.3	2659.16	3798.06	2964.47	2848.79	3443	2752.91	3759.54	3084.54	3861.37	2660.37	3387.06	3335.94	2765.45	2333.55	3277.91	2383.08	2689.97	3857.62		144.977	138.653	147.217	126.223	143.236	146.461	136.581	149.011	130.171	143.387	143.482	125.701	149.216	149.169	148.169	141.261	150.771	153.502	153.915		143.216	8.17897	343
344	3285.36	2653.25	3790.46	2961.38	2834.32	3435.61	2754.84	3761.35	3080.49	3855.7	2667.71	3391.3	3340.11	2772.6	2321.81	3284.82	2379.44	2678.68	3831.19		144.672	138.345	146.923	126.091	142.509	146.147	136.676	149.083	130	143.176	143.878	125.859	149.403	149.554	147.424	141.559	150.541	152.858	152.861		143.029	8.05686	344
345	3296.02	2664.05	3799.69	2968.22	2831.53	3438.03	2741.2	3753.11	3069.73	3860.9	2659.11	3399.46	3340.56	2774.99	2315.91	3290.25	2353.57	2676.33	3846.39		145.141	138.908	147.281	126.383	142.369	146.25	136	148.756	129.546	143.37	143.414	126.162	149.422	149.683	147.049	141.793	148.904	152.724	153.467		142.98	8.00151	345
346	3291.03	2658.19	3798.22	2967.21	2841.97	3451.05	2749.24	3754.81	3082.29	3856.37	2655.54	3381.11	3336.84	2775.89	2316.65	3296.21	2358.14	2672.54	3819.85		144.921	138.603	147.223	126.34	142.894	146.804	136.398	148.824	130.076	143.201	143.222	125.481	149.256	149.732	147.096	142.049	149.193	152.507	152.408		142.959	7.95976	346
347	3290.76	2660.5	3791.82	2961.76	2835.99	3446.03	2754.92	3753.78	3085.74	3843.43	2660.48	3384.81	3332.69	2767	2325.64	3277.8	2373.82	2673.78	3831.87		144.909	138.723	146.975	126.108	142.593	146.59	136.68	148.782	130.222	142.721	143.488	125.618	149.071	149.252	147.667	141.257	150.185	152.579	152.888		142.964	8.00372	347
348	3290.57	2661.06	3805.06	2970.82	2831.08	3453.59	2742.21	3761.09	3075.94	3840.55	2667.07	3376.24	3338.38	2761.48	2317.09	3284.37	2376	2678.55	3842.75		144.901	138.752	147.489	126.493	142.346	146.912	136.05	149.072	129.808	142.614	143.843	125.3	149.325	148.955	147.124	141.54	150.324	152.851	153.322		143.001	8.12785	348
349	3290.29	2662.49	3796.94	2976.39	2832.07	3440.33	2755.86	3757.25	3081.77	3851.81	2652.68	3377.05	3333.71	2766.2	2330.49	3291.35	2367.33	2667.59	3820.65		144.888	138.827	147.174	126.73	142.396	146.348	136.727	148.92	130.054	143.032	143.068	125.33	149.116	149.209	147.975	141.84	149.775	152.225	152.44		142.951	7.91746	349
350	3283.76	2646.19	3796.86	2968.7	2835	3454.56	2730.49	3752.25	3077.75	3847.2	2658.72	3385.03	3347.73	2758.5	2324.86	3271.24	2362.65	2672.46	3831.78		144.601	137.977	147.171	126.403	142.543	146.953	135.468	148.722	129.885	142.861	143.393	125.626	149.743	148.794	147.618	140.974	149.479	152.503	152.884		142.821	8.05841	350
351	3264.61	2660.02	3803.44	2975.97	2838.04	3442.28	2770.66	3756.28	3073.61	3854.64	2651.4	3380.35	3339.07	2772.64	2329.76	3265.62	2365.32	2668.57	3831.67		143.758	138.698	147.426	126.713	142.696	146.431	137.461	148.882	129.71	143.137	142.999	125.452	149.356	149.556	147.929	140.731	149.648	152.281	152.879		142.934	7.96806	351
352	3267.69	2655.08	3783.58	2957.97	2834.01	3442.98	2780.48	3757.65	3061.24	3853.19	2659.93	3382.31	3338.83	2751.47	2328.48	3279.66	2364.64	2662.48	3827.13		143.893	138.441	146.656	125.946	142.493	146.46	137.948	148.936	129.188	143.083	143.458	125.525	149.345	148.414	147.847	141.336	149.605	151.933	152.698		142.8	7.97265	352
353	3262.73	2656.1	3796.31	2954.47	2827.68	3444.56	2745.75	3744.55	3081.86	3847.47	2651.19	3366.96	3342.17	2758.18	2316.39	3275.82	2360	2667.2	3838.56		143.675	138.494	147.15	125.797	142.175	146.528	136.225	148.417	130.058	142.871	142.987	124.956	149.495	148.776	147.079	141.171	149.312	152.203	153.155		142.659	8.0667	353
354	3280.05	2649.29	3799.63	2958.53	2831.99	3460.73	2745.29	3748.08	3074.61	3840.58	2651.64	3371.83	3335.65	2757.75	2323.81	3259.09	2358.1	2676.71	3833.59		144.438	138.139	147.278	125.97	142.391	147.216	136.202	148.557	129.752	142.615	143.011	125.136	149.203	148.753	147.551	140.45	149.191	152.745	152.956		142.713	8.12298	354
355	3269.91	2645.56	3788.12	2957.17	2827.42	3445.8	2733.08	3764	3063.56	3847.27	2654.84	3369.55	3342.27	2768.93	2320.11	3273.21	2377.94	2663.84	3837.1		143.991	137.944	146.832	125.912	142.162	146.58	135.597	149.188	129.286	142.863	143.184	125.052	149.499	149.356	147.316	141.058	150.446	152.011	153.096		142.704	8.24642	355
356	3274.5	2649.1	3789.44	2962.05	2838.18	3435.15	2759.03	3753.47	3073.24	3835.07	2670.86	3371.19	3325.6	2760.71	2321.38	3276.59	2346.77	2668.7	3827.19		144.193	138.129	146.883	126.12	142.703	146.127	136.884	148.77	129.694	142.41	144.048	125.113	148.753	148.913	147.397	141.204	148.474	152.288	152.701		142.674	7.95752	356
357	3278.14	2654.72	3783.89	2962.3	2838.96	3453.79	2747.34	3748.48	3079.43	3840.75	2651.28	3376.59	3331.47	2755.98	2317.28	3271.49	2362.08	2657.79	3833.85		144.354	138.422	146.668	126.131	142.742	146.92	136.304	148.573	129.956	142.621	142.992	125.313	149.016	148.658	147.136	140.984	149.443	151.666	152.967		142.677	7.94258	357
358	3264.6	2645.92	3793.18	2970.83	2838.86	3447.69	2738.71	3755.8	3075.9	3838.73	2662.06	3367.04	3332.24	2761.66	2340.14	3277.71	2359.27	2652.39	3833.97		143.757	137.963	147.028	126.494	142.737	146.661	135.876	148.863	129.807	142.546	143.574	124.959	149.05	148.964	148.588	141.253	149.265	151.357	152.971		142.722	8.03553	358
359	3256.98	2660.9	3789.47	2946.45	2816.99	3434.04	2755.65	3762.35	3073.47	3842.97	2655.72	3350.6	3330.01	2759.95	2321.4	3279.25	2360.85	2671.19	3819.79		143.422	138.744	146.884	125.456	141.638	146.08	136.716	149.122	129.704	142.704	143.231	124.348	148.951	148.872	147.398	141.319	149.365	152.431	152.406		142.568	8.1458	359
360	3270.19	2662.21	3779.11	2956.15	2822.88	3438.77	2747.52	3756.05	3074.49	3845.08	2658.56	3354.95	3330.04	2763.5	2336.3	3277.95	2362.31	2657.41	3820.56		144.003	138.812	146.483	125.869	141.934	146.281	136.313	148.873	129.747	142.782	143.385	124.51	148.952	149.063	148.344	141.263	149.457	151.644	152.436		142.64	8.07769	360
361	3269.42	2647.37	3782.68	2942.69	2827.86	3433.54	2753.03	3761.87	3057.98	3841.62	2652.97	3357.85	3330.13	2748.37	2314.67	3279.83	2374.12	2660.67	3831.65		143.969	138.039	146.621	125.295	142.184	146.059	136.587	149.103	129.051	142.654	143.083	124.617	148.956	148.248	146.97	141.344	150.204	151.83	152.879		142.51	8.20005	361
362	3262.49	2645.73	3791.07	2948.8	2829.73	3443.34	2736.63	3753.77	3058.03	3838.5	2648.16	3355.1	3338.27	2755.01	2322.73	3263.29	2360.94	2660.17	3826.85		143.664	137.953	146.946	125.556	142.278	146.476	135.773	148.782	129.053	142.538	142.824	124.515	149.32	148.605	147.482	140.631	149.37	151.802	152.687		142.434	8.21871	362
363	3254.3	2644.76	3778.85	2955.41	2845.94	3444.2	2741.69	3760.64	3056.63	3853.44	2670.23	3354.03	3332.59	2761.7	2328.71	3270.46	2362.6	2661.68	3819.58		143.304	137.902	146.473	125.837	143.093	146.512	136.024	149.055	128.993	143.092	144.014	124.476	149.066	148.966	147.862	140.94	149.476	151.888	152.397		142.598	8.1988	363
364	3264.97	2658.51	3772.57	2954.34	2821.09	3439.75	2748.98	3752.33	3062.79	3828.52	2658.13	3342.43	3333.81	2762.4	2315.55	3272.5	2357.54	2670.79	3823.05		143.774	138.619	146.229	125.791	141.844	146.323	136.385	148.725	129.254	142.167	143.361	124.045	149.121	149.004	147.026	141.028	149.156	152.407	152.535		142.463	8.17502	364
365	3272	2656.05	3773.97	2942.77	2828.07	3439.19	2734.57	3755.2	3067.99	3848.43	2652.99	3337.13	3337.14	2758.22	2315.3	3270.1	2364.47	2651.87	3830.83		144.083	138.491	146.284	125.299	142.195	146.299	135.67	148.839	129.473	142.906	143.084	123.848	149.269	148.779	147.011	140.924	149.594	151.328	152.846		142.433	8.24467	365
366	3260.6	2653.52	3787.06	2945.73	2822.58	3439.03	2739.77	3762.01	3064.66	3837.58	2659.11	3345.12	3323.8	2750.9	2330.69	3262.79	2361.92	2664.85	3819.9		143.581	138.359	146.791	125.425	141.918	146.292	135.929	149.109	129.332	142.503	143.414	124.145	148.673	148.384	147.987	140.609	149.432	152.069	152.41		142.44	8.22436	366
367	3254.93	2652.89	3783.71	2948.55	2822.1	3430.73	2739.33	3766.59	3064.83	3845.19	2643.57	3352.26	3327.28	2749.23	2310.18	3269.34	2367.42	2668.67	3816.73		143.332	138.326	146.661	125.545	141.894	145.939	135.907	149.29	129.34	142.786	142.576	124.41	148.828	148.294	146.685	140.892	149.781	152.287	152.283		142.371	8.15353	367
368	3258.6	2646.32	3785.68	2936.54	2823.05	3427.3	2751.13	3753.5	3054.08	3839.29	2653.17	3332.9	3339.86	2761.63	2314.75	3257.19	2366.4	2659.71	3825.88		143.493	137.984	146.738	125.034	141.942	145.794	136.492	148.771	128.886	142.567	143.094	123.692	149.391	148.962	146.975	140.368	149.716	151.775	152.649		142.333	8.35038	368
369	3251.4	2647.99	3774.57	2949.81	2824.21	3445.21	2748.14	3751.3	3055.97	3834.83	2643.48	3330.87	3322.25	2775.2	2322.66	3266.5	2365.89	2656.6	3817.29		143.176	138.071	146.307	125.599	142.001	146.555	136.344	148.684	128.966	142.401	142.571	123.616	148.603	149.694	147.478	140.769	149.684	151.598	152.306		142.338	8.27064	369
370	3261.44	2650.61	3790.69	2941.18	2816.35	3426.67	2736.93	3752.85	3059.85	3841.04	2652.57	3337.65	3325.28	2775.55	2316.03	3263.07	2361.65	2669.12	3815.42		143.618	138.208	146.932	125.231	141.605	145.767	135.788	148.746	129.129	142.632	143.062	123.868	148.739	149.713	147.057	140.622	149.416	152.312	152.231		142.351	8.31286	370
371	3254.29	2648.49	3781.47	2943.91	2821.36	3438.72	2751.21	3763.63	3067.66	3844.06	2647.49	3336.52	3336.57	2774.04	2304.56	3261.81	2353.66	2641.52	3810.12		143.303	138.097	146.574	125.347	141.857	146.279	136.496	149.173	129.459	142.744	142.787	123.826	149.244	149.632	146.328	140.567	148.91	150.738	152.02		142.283	8.13848	371
372	3252.74	2647.84	3784.47	2931.48	2814.52	3437.77	2741.23	3742.45	3052.68	3829.37	2657.86	3339.33	3321.73	2752.57	2313.03	3265.67	2363.97	2647.59	3814.6		143.235	138.063	146.69	124.818	141.513	146.239	136.001	148.333	128.827	142.198	143.347	123.93	148.58	148.474	146.866	140.734	149.563	151.084	152.198		142.142	8.22158	372
373	3249.03	2638.54	3789.01	2931.19	2821.14	3426.99	2741.64	3755.62	3061.83	3820.26	2637.2	3336.39	3333.11	2757.89	2326.22	3281.17	2365.4	2658.94	3811.27		143.072	137.578	146.866	124.806	141.846	145.78	136.022	148.856	129.213	141.86	142.233	123.821	149.089	148.761	147.704	141.401	149.653	151.732	152.066		142.229	8.31479	373
374	3252.51	2645.14	3770.47	2930.42	2830.65	3439.07	2745.17	3754.66	3059.56	3837.47	2653.53	3334.28	3330.95	2749.55	2323.75	3267.64	2350.14	2663.92	3808.16		143.225	137.922	146.148	124.773	142.324	146.294	136.196	148.818	129.117	142.499	143.113	123.743	148.993	148.311	147.547	140.819	148.687	152.016	151.942		142.236	8.25672	374
375	3251.31	2639.89	3766.1	2940.24	2817.13	3426.18	2741	3755.11	3053.96	3833.5	2647.5	3322.94	3328.63	2753.53	2315.98	3267.8	2357.44	2652.78	3815.11		143.172	137.649	145.978	125.191	141.644	145.746	135.99	148.835	128.881	142.352	142.788	123.322	148.889	148.526	147.054	140.825	149.149	151.38	152.219		142.084	8.26458	375
376	3250.5	2638.29	3760.5	2926.19	2811	3434.85	2730.92	3744.3	3054.26	3842.13	2646.53	3326.84	3338.84	2751.59	2326.3	3257.3	2350.67	2667.69	3819.33		143.136	137.565	145.762	124.593	141.336	146.115	135.49	148.407	128.893	142.672	142.736	123.467	149.346	148.421	147.708	140.373	148.721	152.231	152.387		142.071	8.40814	376
377	3251.25	2632.98	3753.36	2936.66	2817.81	3436.79	2737.35	3752.63	3057.98	3825.6	2662.29	3311.1	3329.11	2753.51	2312.75	3255.82	2358.4	2670.66	3811.83		143.169	137.288	145.485	125.039	141.679	146.197	135.809	148.737	129.05	142.059	143.586	122.882	148.91	148.524	146.849	140.309	149.21	152.4	152.088		142.067	8.39501	377
378	3255.23	2642.83	3772.61	2930.04	2809.29	3429.28	2737.66	3750.56	3058.29	3832.67	2654.93	3308.49	3354.11	2744.37	2315.26	3249.54	2351.58	2661.18	3811.44		143.345	137.802	146.231	124.757	141.25	145.878	135.824	148.655	129.064	142.321	143.189	122.785	150.029	148.031	147.008	140.039	148.778	151.859	152.073		142.048	8.41391	378
379	3253.04	2630.2	3770.54	2931.77	2801.07	3440.64	2746.78	3762.63	3060.13	3836.41	2641.63	3319.61	3334.76	2759.15	2326	3264.08	2361.93	2650.7	3807.75		143.248	137.143	146.151	124.83	140.837	146.361	136.276	149.133	129.141	142.46	142.471	123.198	149.163	148.829	147.689	140.665	149.433	151.261	151.925		142.117	8.37238	379
380	3238.3	2645.73	3762.38	2927	2805.52	3437.67	2736.78	3754.16	3049.32	3849.62	2635.5	3325.5	3332.34	2755.08	2331.45	3262.18	2349.06	2665.18	3813.11		142.599	137.953	145.834	124.627	141.06	146.235	135.78	148.797	128.685	142.951	142.141	123.417	149.055	148.609	148.036	140.583	148.619	152.087	152.139		142.064	8.40012	380
381	3243.73	2643.45	3779.5	2935.06	2812.26	3429.5	2746.18	3748.61	3056.92	3831.25	2652.79	3314.28	3329.62	2753.72	2320.28	3257.24	2347.46	2654.03	3803.77		142.838	137.834	146.498	124.97	141.4	145.887	136.247	148.578	129.006	142.269	143.073	123	148.933	148.536	147.327	140.37	148.518	151.451	151.766		142.026	8.27227	381
382	3235.88	2650.68	3763.69	2932.97	2812.97	3419.11	2736.58	3758.39	3060.02	3830.08	2657.02	3312.31	3337.49	2753.95	2309.54	3275.54	2350.81	2656	3822.75		142.492	138.211	145.885	124.882	141.435	145.445	135.771	148.965	129.137	142.225	143.302	122.927	149.285	148.548	146.644	141.159	148.73	151.563	152.524		142.059	8.33153	382
383	3241.91	2629.73	3776.29	2935.59	2808.06	3431.71	2732.23	3732.46	3054.94	3833.88	2649.23	3314.9	3334.71	2747.52	2316.27	3254.67	2348.65	2659.99	3810.21		142.758	137.119	146.373	124.993	141.188	145.981	135.555	147.938	128.922	142.366	142.882	123.023	149.161	148.201	147.072	140.259	148.593	151.791	152.023		141.905	8.32326	383
384	3245.73	2640.41	3774.35	2928.45	2808.5	3422.27	2743.6	3758.93	3057.21	3823.09	2638.87	3308.63	3322.57	2750.3	2329.63	3258.79	2353.98	2655.57	3799.88		142.926	137.675	146.298	124.689	141.211	145.58	136.119	148.987	129.018	141.965	142.323	122.791	148.618	148.351	147.92	140.437	148.931	151.539	151.611		141.947	8.35137	384
385	3230.55	2641.69	3777.96	2923.74	2800.72	3426.12	2740.68	3746.61	3049.55	3819.07	2646.53	3305.82	3321.76	2750.02	2325.72	3245.58	2355.36	2669.83	3798.74		142.258	137.742	146.438	124.489	140.819	145.743	135.974	148.498	128.695	141.816	142.736	122.686	148.581	148.336	147.672	139.868	149.018	152.353	151.566		141.857	8.45062	385
386	3234.75	2631.86	3776.7	2922.76	2806.06	3436.76	2732.36	3755.62	3054.36	3821.5	2640.62	3303.75	3323.76	2744.79	2324.43	3260.99	2344.2	2660.41	3806.24		142.443	137.23	146.389	124.447	141.088	146.196	135.561	148.855	128.898	141.906	142.417	122.61	148.671	148.054	147.59	140.532	148.311	151.815	151.865		141.836	8.43738	386
387	3235.64	2638.27	3766.39	2925.54	2817.61	3422.74	2734.71	3754.03	3066.97	3831.83	2651.23	3287.84	3318.12	2749.3	2337.91	3259.96	2347.91	2661.2	3798.77		142.482	137.564	145.99	124.565	141.669	145.599	135.678	148.792	129.43	142.29	142.989	122.019	148.419	148.297	148.446	140.487	148.546	151.86	151.567		141.931	8.44018	387
388	3236.52	2636.07	3765.73	2922.26	2794.06	3431.16	2728.74	3758.06	3042.6	3822.68	2649.18	3288.86	3334.03	2756.33	2323.35	3244.8	2344.66	2652.24	3796.88		142.521	137.449	145.964	124.426	140.485	145.958	135.381	148.952	128.401	141.95	142.879	122.057	149.13	148.676	147.522	139.834	148.341	151.349	151.492		141.725	8.54067	388
389	3229.2	2645.8	3774.52	2939.3	2815.93	3443.93	2737.67	3742.96	3052.89	3833.38	2640.32	3294.17	3322.71	2752.48	2333.02	3261.79	2355.52	2654.93	3799.03		142.198	137.957	146.305	125.151	141.584	146.501	135.824	148.354	128.836	142.348	142.401	122.254	148.624	148.469	148.136	140.566	149.028	151.503	151.577		141.98	8.39186	389
390	3231.89	2634.76	3769.01	2927.81	2806	3425.55	2731.04	3753.96	3067.71	3833.72	2644.71	3299.96	3319.39	2741.22	2330.63	3256.52	2349.26	2637.19	3795.9		142.317	137.381	146.091	124.662	141.085	145.719	135.496	148.79	129.461	142.36	142.638	122.469	148.476	147.862	147.984	140.339	148.632	150.49	151.452		141.774	8.27287	390
391	3243.66	2649.74	3762.41	2934.85	2799.83	3426.76	2735.12	3747.43	3041.54	3826.36	2643.75	3286.76	3329.11	2752.64	2324.04	3249.06	2339.38	2658.93	3794.69		142.835	138.162	145.836	124.962	140.775	145.77	135.698	148.531	128.357	142.087	142.586	121.979	148.91	148.478	147.565	140.018	148.007	151.731	151.404		141.773	8.42521	391
392	3232.04	2627.78	3761.07	2933.99	2809.04	3437.14	2723.48	3755.14	3056.9	3818.76	2647.12	3284	3323.23	2754.27	2317.52	3263.15	2357.38	2648.01	3799.03		142.323	137.017	145.783	124.925	141.238	146.212	135.12	148.836	129.005	141.805	142.768	121.877	148.647	148.565	147.151	140.625	149.145	151.108	151.577		141.775	8.45457	392
393	3223.58	2628.12	3767.51	2918.95	2804.65	3433.94	2729.81	3752.61	3058.71	3819.42	2639.87	3276.04	3332.73	2759.66	2318.73	3256.35	2347.96	2651.64	3796.51		141.951	137.035	146.033	124.285	141.017	146.076	135.435	148.736	129.081	141.829	142.377	121.581	149.072	148.856	147.228	140.332	148.55	151.315	151.477		141.698	8.55231	393
394	3234.69	2634.01	3764.02	2928.52	2807.09	3415.58	2738.73	3759.43	3047.11	3809.67	2645.48	3281.05	3332.18	2741.96	2332.81	3258.43	2333.77	2654.15	3798.6		142.44	137.342	145.898	124.692	141.14	145.295	135.877	149.006	128.592	141.467	142.679	121.767	149.048	147.901	148.122	140.422	147.652	151.458	151.56		141.703	8.46136	394
395	3232.08	2622.56	3758.96	2918.31	2798.72	3428.32	2732.48	3746.02	3057.82	3814.61	2653.68	3276.97	3326.07	2763.27	2325.31	3240.94	2344.48	2653.41	3799.67		142.325	136.745	145.702	124.258	140.719	145.837	135.567	148.475	129.044	141.651	143.121	121.616	148.775	149.051	147.646	139.668	148.33	151.416	151.603		141.66	8.56037	395
396	3224.16	2634.07	3773.29	2907.95	2805.06	3421.64	2733.95	3740.45	3046.87	3822.07	2656.74	3281.52	3339.51	2741.73	2320.54	3254.18	2349.51	2644.06	3798.51		141.976	137.345	146.257	123.816	141.038	145.553	135.64	148.254	128.582	141.928	143.286	121.785	149.376	147.889	147.343	140.238	148.647	150.882	151.557		141.652	8.54324	396
397	3233.05	2630.95	3768.06	2917.16	2809.99	3434.1	2733.51	3754.36	3052.6	3826.11	2640.6	3273.91	3320.47	2739.72	2324.7	3246.67	2341.11	2638.9	3797.96		142.368	137.182	146.054	124.209	141.285	146.083	135.618	148.805	128.823	142.078	142.416	121.502	148.524	147.781	147.607	139.915	148.116	150.588	151.534		141.605	8.47711	397
398	3226.3	2626.48	3768.4	2926.49	2808.09	3422.85	2739.88	3763.3	3035.97	3821.15	2638.52	3265.15	3312.4	2754.57	2332.62	3239.59	2355.64	2637.21	3794.17		142.071	136.949	146.068	124.606	141.19	145.604	135.934	149.16	128.122	141.893	142.304	121.177	148.163	148.582	148.11	139.61	149.036	150.491	151.383		141.603	8.59509	398
399	3224.62	2631.4	3762.44	2923.36	2797.91	3440.57	2723.19	3765.7	3047.6	3822.7	2645.19	3272.13	3328.4	2740.2	2323.96	3247.4	2352.61	2648.58	3795.51		141.997	137.206	145.837	124.472	140.678	146.358	135.106	149.255	128.613	141.951	142.663	121.436	148.879	147.807	147.56	139.946	148.844	151.14	151.437		141.641	8.58863	399
400	3222.37	2638.09	3762.13	2920.79	2801.79	3427.08	2741.27	3753.66	3040.94	3834.28	2648.4	3277.29	3328.23	2749.58	2327.16	3252.02	2341.39	2641.75	3786.68		141.898	137.555	145.825	124.363	140.873	145.784	136.003	148.778	128.331	142.381	142.836	121.627	148.871	148.313	147.763	140.146	148.134	150.75	151.084		141.648	8.47213	400
401	3219.2	2633.42	3753.91	2916.68	2809.63	3417.29	2731.04	3746.29	3039.65	3837.6	2630.16	3281.84	3321.58	2748.85	2315.94	3243.96	2347.88	2639.79	3794.26		141.758	137.311	145.506	124.188	141.267	145.367	135.496	148.486	128.277	142.504	141.853	121.796	148.574	148.273	147.051	139.798	148.544	150.639	151.387		141.478	8.45405	401
402	3226.43	2631.82	3771.54	2913.63	2796.96	3429.17	2723.24	3755.67	3041.23	3828.92	2640.62	3251.71	3320.81	2746.22	2324.5	3246.08	2350.91	2651.8	3801.92		142.077	137.228	146.189	124.058	140.63	145.873	135.109	148.857	128.344	142.182	142.417	120.678	148.539	148.131	147.594	139.889	148.736	151.324	151.693		141.555	8.74658	402
403	3215.26	2629.15	3756.22	2923.39	2790.85	3429.27	2734.01	3750.12	3038.67	3836.53	2639.84	3264.35	3322.08	2745.74	2316.69	3251.38	2343.75	2630.6	3800.52		141.585	137.088	145.596	124.474	140.323	145.877	135.643	148.637	128.236	142.465	142.375	121.147	148.596	148.105	147.099	140.118	148.283	150.114	151.637		141.442	8.50369	403
404	3223.76	2624.96	3756.49	2905.43	2802.09	3418.47	2729.86	3748.01	3045.12	3831.22	2650.59	3275.63	3321.04	2736.21	2335.4	3240.63	2347.09	2643.12	3797.9		141.959	136.87	145.606	123.709	140.888	145.418	135.437	148.554	128.508	142.267	142.955	121.566	148.549	147.591	148.287	139.654	148.495	150.829	151.532		141.509	8.58084	404
405	3224.94	2630.17	3755.5	2912.27	2793.59	3413.6	2723.29	3760.82	3055.7	3824.56	2634.91	3256.1	3315.15	2750.58	2317.94	3244.76	2344.96	2636.17	3793.55		142.011	137.142	145.568	124	140.461	145.211	135.111	149.062	128.954	142.02	142.109	120.841	148.286	148.367	147.178	139.832	148.36	150.432	151.358		141.384	8.55848	405
406	3221.64	2621.48	3750.7	2906.7	2801.01	3422.22	2740.26	3744.28	3045.29	3824.69	2641.23	3256.73	3312.53	2753.31	2319.73	3250.77	2341	2651.64	3794.69		141.866	136.689	145.382	123.763	140.834	145.577	135.953	148.406	128.515	142.025	142.45	120.864	148.169	148.514	147.292	140.092	148.109	151.315	151.404		141.432	8.61852	406
407	3218.55	2623.78	3756.96	2913.47	2792.61	3416.77	2733	3751.72	3026.15	3818.96	2634.26	3255.56	3315.4	2754.93	2303.84	3244.45	2346.67	2642.08	3791.71		141.73	136.809	145.624	124.051	140.412	145.345	135.593	148.701	127.707	141.812	142.074	120.821	148.297	148.601	146.283	139.819	148.468	150.769	151.285		141.274	8.63322	407
408	3217.53	2612.24	3748.78	2915.51	2799.16	3406.49	2729.88	3751.54	3042.63	3816.91	2637.71	3256.89	3308.93	2742	2314.73	3241.71	2345.77	2651.03	3804.95		141.684	136.207	145.307	124.138	140.741	144.908	135.438	148.694	128.403	141.736	142.26	120.871	148.008	147.904	146.974	139.701	148.411	151.28	151.813		141.288	8.60815	408
409	3215.87	2632.55	3746.22	2918.4	2791.64	3425.23	2741.09	3744.72	3044.8	3824.63	2647.81	3258.07	3311.91	2750.26	2311.12	3237.99	2341.66	2641.03	3792.45		141.612	137.266	145.208	124.261	140.363	145.706	135.994	148.424	128.494	142.023	142.805	120.914	148.141	148.349	146.745	139.541	148.151	150.709	151.315		141.369	8.48653	409
410	3208.33	2617.14	3752.53	2914.49	2798.08	3424.27	2728.45	3745.76	3044.12	3823.15	2642.65	3241.3	3312.29	2745.01	2310.95	3250.36	2341.84	2639.1	3784.49		141.279	136.462	145.453	124.095	140.686	145.664	135.367	148.465	128.466	141.968	142.526	120.292	148.158	148.066	146.734	140.074	148.163	150.599	150.997		141.238	8.59009	410
411	3218.55	2620.18	3745.69	2894.11	2790.17	3416.1	2729.28	3745.66	3042.78	3815.64	2644.67	3251.51	3305.37	2749.87	2328.79	3243.77	2343.87	2656.3	3796.74		141.729	136.621	145.187	123.227	140.289	145.317	135.408	148.461	128.409	141.689	142.635	120.671	147.849	148.328	147.867	139.79	148.291	151.581	151.486		141.307	8.75592	411
412	3202.94	2630.44	3748.34	2918.89	2792.56	3412.2	2716.87	3757.86	3047.3	3834	2629.66	3228.08	3309.69	2752.66	2314.33	3244.07	2336.25	2638.92	3787.55		141.042	137.156	145.29	124.282	140.409	145.151	134.792	148.944	128.6	142.371	141.826	119.801	148.042	148.479	146.949	139.803	147.808	150.589	151.119		141.182	8.64512	412
413	3220.29	2618.38	3751.34	2912.42	2789.95	3416.01	2719.56	3752.32	3042.62	3821.11	2635.16	3237.79	3301.87	2767.66	2318.73	3248.07	2342.41	2640.72	3783.3		141.806	136.527	145.407	124.007	140.278	145.313	134.926	148.725	128.402	141.892	142.123	120.162	147.692	149.288	147.228	139.975	148.199	150.692	150.95		141.241	8.69509	413
414	3211.23	2628.24	3748.95	2906.69	2792.25	3433.89	2720.82	3742.26	3040.14	3815.9	2629.44	3243.64	3311.28	2755.21	2315.29	3257.6	2347.47	2632.51	3775.57		141.407	137.041	145.314	123.762	140.393	146.074	134.988	148.326	128.298	141.698	141.814	120.379	148.113	148.616	147.009	140.386	148.518	150.223	150.641		141.211	8.62683	414
415	3203.42	2613.19	3752.69	2913.54	2786.59	3411.8	2725.2	3738.57	3040.82	3831.07	2645.16	3240.02	3304.32	2739.54	2320.48	3241.54	2339.9	2632.59	3788.15		141.063	136.256	145.459	124.054	140.109	145.134	135.206	148.18	128.326	142.262	142.662	120.244	147.802	147.771	147.339	139.694	148.04	150.228	151.143		141.104	8.58308	415
416	3196.62	2623.09	3745.28	2913.19	2784.68	3412.79	2726.06	3743.82	3041.42	3819.25	2643.49	3227.39	3314.95	2732.94	2324.12	3222.67	2329.8	2637.48	3780.27		140.764	136.772	145.172	124.039	140.013	145.176	135.248	148.388	128.352	141.823	142.572	119.776	148.277	147.415	147.57	138.88	147.4	150.507	150.829		140.999	8.62182	416
417	3199.88	2626.71	3736.82	2898.15	2780.74	3415.31	2726.33	3746.11	3041.84	3817.38	2631.65	3224.65	3315.65	2733.35	2308.62	3242.06	2334.14	2626.21	3787.32		140.907	136.961	144.843	123.399	139.815	145.283	135.262	148.478	128.369	141.753	141.933	119.674	148.308	147.437	146.586	139.716	147.675	149.864	151.11		140.915	8.63947	417
418	3211.09	2623.69	3747.08	2897.79	2782.27	3401.86	2729.36	3737.88	3051.27	3802.08	2644.04	3237.08	3314.14	2752.69	2320.67	3239.4	2338.53	2638.94	3783.77		141.401	136.804	145.241	123.384	139.892	144.711	135.412	148.152	128.768	141.185	142.602	120.135	148.241	148.48	147.352	139.601	147.953	150.59	150.968		141.099	8.64879	418
419	3197.22	2624.65	3744.13	2902.35	2780.9	3417.71	2727.38	3745.98	3037.38	3838.87	2627.17	3224	3305.12	2749.86	2319.47	3239.94	2346.53	2645.31	3779.67		140.79	136.854	145.127	123.578	139.823	145.385	135.314	148.473	128.181	142.551	141.691	119.65	147.837	148.328	147.275	139.625	148.459	150.953	150.805		141.09	8.77206	419
