# Supplementary material for: A mechano-osmotic feedback couples cell volume to the rate of cell deformation
Source: eLife journal article supplement (doi:10.7554/elife.72381), 2022-04-13
Supplement: supp [file 3exp.xlsx]

## Sheet: V
	exp1 n=63			exp 2 n=20			exp 3 n=28
0	100	5.66174e-15		100	5.64682e-15		100	2.73488e-15
1	99.836	0.94245		100.122	0.403579		100.071	0.500093
2	99.8439	1.18989		100.34	0.58531		100.122	0.660714
3	99.7393	1.33746		100.503	0.606864		99.7933	0.746469
4	99.8158	1.62604		100.665	0.715574		99.5874	0.923842
5	99.8629	2.13149		100.881	0.768551		100.017	1.33659
6	99.8561	2.52629		100.976	0.781227		100.004	1.62431
7	99.935	2.7559		101.235	0.866523		100.057	1.63709
8	100.17	3.05261		101.184	0.758529		100.174	1.69505
9	100.082	3.21957		101.497	0.898469		100.359	1.73391
10	149.329	24.6731		147.689	4.98584		136.676	33.4682
11	163.962	10.1869		137.256	5.60905		149.282	5.48599
12	155.163	12.9806		126.2	10.3868		145.958	5.94923
13	146.485	15.9836		116.954	12.4123		142.852	6.07673
14	140.978	16.88		111.795	11.7876		140.259	6.15399
15	137.204	16.4542		108.907	10.5137		137.572	6.11125
16	133.982	15.7733		107.455	9.63546		134.873	6.09446
17	130.949	15.2307		106.533	8.81585		132.415	6.08256
18	128.484	14.7647		106.08	8.23612		129.977	5.97343
19	126.256	14.1469		105.729	7.68299		127.892	5.71665
20	124.292	13.8796		105.737	7.55392		125.975	5.76314
21	122.548	13.4176		105.76	7.57985		124.21	5.54355
22	121.313	12.9671		105.927	7.35243		122.849	5.41699
23	119.86	12.6962		106.076	7.44226		121.979	5.34073
24	118.792	12.7813		106.485	7.528		121.155	5.24263
25	117.86	12.707		106.922	7.6006		120.675	5.04806
26	117.32	12.4589		107.145	7.53709		120.413	4.89157
27	116.847	12.2753		107.582	7.63161		120.312	4.90776
28	116.645	12.4077		108.059	7.53037		120.096	4.84424
29	116.389	12.8788		108.455	7.65881		120.152	4.82315
30	116.184	12.8701		108.707	7.66684		120.296	4.87833
31	116.385	13.055		108.901	7.88717		120.449	4.92962
32	116.493	13.0731		109.11	7.84915		120.69	4.73824
33	116.794	13.0337		109.238	7.96968		120.92	4.77367
34	117.032	13.0547		109.614	8.03081		121.202	4.53911
35	117.367	13.2723		109.713	8.11471		121.185	4.48408
36	117.633	13.3008		109.936	8.30056		121.397	4.57629
37	117.76	13.5254		109.844	8.33275		121.613	4.38371
38	118.11	13.881		109.827	8.3655		121.829	4.51325
39	118.52	13.7467		109.841	8.33423		122.021	4.46971
40	118.817	13.8127		109.937	8.26757		122.239	4.42155
41				110.047	8.37354		122.416	4.53231
42				110.023	8.2741		122.475	4.60724
43				110.074	8.51602		122.551	4.49147
44				110.1	8.24606		122.613	4.40805
45				110.14	8.13611		122.723	4.4638
46				110.43	8.1706		122.636	4.45088
47				110.513	8.42917		122.81	4.38457
48				110.82	8.37561		122.806	4.53198
49				110.808	8.36459		122.732	4.51855
50				111.047	8.18704		122.895	4.59767
51				111.229	8.13225		122.891	4.66326
52				111.128	7.89978		122.965	4.59263
53				111.303	7.98313		122.738	4.68827
54				111.452	8.03345		122.77	4.54995
55				111.554	8.07432		122.841	4.72125
56				111.653	8.06895		122.794	4.66749
57				111.732	8.18993		122.783	4.78062
58				111.841	8.08688		122.893	4.45683
59				111.806	8.20576		122.858	4.59715
60				111.769	8.05139		122.961	4.68409
61				111.919	7.99563		122.962	4.59718
62				111.929	8.26637		122.875	4.61564
63				112.132	8.30111		122.923	4.68722
64				111.811	8.24177		122.766	4.64801
65				112.05	8.0941		122.901	4.62011
66				112.075	8.32829		122.901	4.6326
67				112.039	8.14886		122.908	4.91118
68				112.089	8.1287		122.996	4.708
69				112.233	8.15995		122.871	4.60489
70				112.338	8.07235		122.932	4.58344
71				112.4	8.16605		122.839	4.63294
72				112.439	8.03032		122.792	4.66972
73				112.511	8.15154		122.922	4.64698
74				112.63	8.13159		122.864	4.65825
75				112.725	8.06237		122.751	4.6855
76				112.976	7.64853		122.68	4.81307
77				113.007	7.27964		122.737	4.76579
78				113.383	6.99218		122.56	4.72698
79				113.569	6.93087		122.636	4.64355
80				113.787	6.58223		122.608	4.80125
81				113.818	6.16747		122.516	4.75208
82				113.94	6.07569		122.344	4.72197
83				114.307	5.4779		122.292	4.77398
84				114.328	5.53414		122.384	4.68493
85				114.507	5.53062		122.343	4.76122
86				114.701	5.29597		122.245	4.82772
87				114.684	5.07749		122.101	4.68066
88				114.931	5.07443		122.219	4.94017
89				115.07	4.93796		122.268	4.80339
90				115.372	4.84605		122.085	4.99257
91				115.479	4.66757		122.064	4.90935
92				115.563	4.87608		122.009	4.82063
93				115.756	4.77756		121.91	5.05221
94				115.824	4.72964		121.928	5.07376
95				115.828	4.69957		121.709	4.96594
96				115.923	4.7037		121.763	5.01976
97				116.195	4.64793		121.827	5.10998
98				116.299	4.89952		121.776	5.06773
99				116.7	4.88155		121.801	5.2769
100				116.55	5.00327		121.685	5.26988
101				116.466	4.9752		121.645	5.18858
102				116.612	5.01312		121.685	5.29541
103				116.659	4.97747		121.606	5.29854
104				116.585	5.08228		121.502	5.26999
105				116.697	5.21659		121.509	5.17997
106				116.675	5.27338		121.327	5.19747
107				116.589	5.25673		121.447	5.21458
108				116.674	5.25008		121.359	5.23449
109				116.781	5.27858		121.192	5.15037
110				116.762	5.34329		121.142	5.21044
111				116.786	5.38513		121.111	5.24351
112				116.841	5.53149		121.238	5.54596
113				117.101	5.72182		121.143	5.37495
114				116.855	5.69294		120.935	5.50627
115				116.956	5.55514		120.747	5.61541
116				116.829	5.60175		120.657	5.62153
117				116.945	5.48026		120.82	5.64849
118				116.916	5.5024		120.786	5.62272
119				116.946	5.45839		120.66	5.57486
120				116.866	5.38706		120.709	5.68887

## Sheet: M
	exp1 n=63			exp 2 n=20			exp 3 n=28
0	100	4.73695e-15		100	4.61061e-15		100	6.69906e-15
1	99.9934	2.42006		100.369	0.963355		100.18	1.27872
2	99.4841	2.98923		100.373	1.22077		100.465	1.47372
3	99.4919	3.02268		100.262	1.42271		100.464	1.65663
4	99.8603	3.4387		100.825	1.44762		100.646	2.08653
5	99.9371	2.63623		100.766	1.52946		100.53	2.12812
6	100.195	4.19361		100.7	1.22129		100.314	2.24153
7	100.553	3.49835		100.723	1.58762		100.841	2.40373
8	100.434	3.84705		100.758	1.26781		100.972	2.37421
9	100.535	3.94409		100.752	1.7138		100.218	2.1655
10	103.615	5.32675		101.169	2.13517		101.39	2.99318
11	103.085	4.81862		101.354	1.97227		101.029	2.88703
12	102.371	4.63739		101.092	2.14737		100.527	2.88999
13	101.961	4.38703		100.852	1.79018		100.499	2.81555
14	101.395	4.25194		100.776	1.98211		100.357	2.78892
15	101.234	4.22908		101.16	2.00823		99.959	2.83013
16	101.161	4.5127		101.481	2.36114		100.423	3.03498
17	101.388	4.7057		101.574	1.97995		100.742	3.1117
18	101.09	4.43665		101.782	2.21456		100.529	2.91205
19	100.531	4.67871		101.925	2.12857		100.051	3.00322
20	100.622	4.77695		101.826	2.04822		100.438	3.13344
21	100.702	5.32573		101.581	2.21106		100.219	3.11963
22	100.954	5.28258		101.887	2.09151		100.321	3.29743
23	100.492	5.85459		101.779	2.27034		99.818	3.35294
24	100.623	6.10914		101.633	2.27647		100.05	3.33685
25	100.758	6.38057		101.702	2.12993		100.376	3.21172
26	101.177	6.98027		101.671	2.27734		100.268	3.13886
27	100.675	6.46332		102.019	2.47127		100.521	3.36602
28	100.999	6.30874		102.726	2.994		100.768	3.17652
29	100.952	6.55602		102.615	2.84165		100.882	2.89517
30	100.761	6.76841		102.237	2.9609		100.615	3.41852
31	100.85	6.8923		102.729	3.20881		100.739	3.44679
32	100.902	6.9952		103.322	3.45402		100.759	3.64739
33	100.855	6.84699		103.107	3.71467		100.64	3.84158
34	101.112	6.52729		102.992	3.64141		100.88	3.95955
35	101.254	6.64994		103.094	3.51336		100.717	3.57248
36	100.721	6.69401		103.001	3.2255		100.973	4.09275
37	100.978	6.74908		103.049	3.21508		100.964	3.85827
38	101.7	7.2939		103.184	3.6583		100.792	3.71756
39	101.573	7.64066		103.43	4.1513		101.059	4.17992
40	101.371	7.50876		103.425	4.35755		101.195	4.20522
41				103.718	4.57756		100.926	3.58083
42				103.403	4.04427		100.908	3.31019
43				103.768	4.21642		101.079	3.51862
44				103.741	4.08659		101.421	3.76384
45				103.506	4.28708		101.14	3.5058
46				103.788	4.20402		101.536	3.40372
47				104.104	4.20239		101.187	3.72516
48				104.088	4.50501		101.387	3.57643
49				104.071	4.66943		101.441	3.58539
50				104.397	4.81903		102.01	4.23689
51				103.976	4.68733		101.378	3.63914
52				104.308	4.75751		101.543	3.84878
53				104.319	5.02074		101.585	3.3806
54				104.769	4.89888		101.971	3.30476
55				104.728	5.4234		101.531	3.32764
56				104.744	5.64656		102.074	3.37522
57				104.913	5.44837		101.679	3.46637
58				105.172	5.71072		101.797	4.1649
59				105.314	5.61303		101.763	3.7772
60				105.424	5.94965		102.416	4.03357
61				105.066	4.99663		101.821	3.9617
62				105.122	5.19315		101.958	3.55234
63				105.052	5.57598		101.778	3.42901
64				104.944	5.59881		102.062	3.9335
65				105.12	4.85506		102.308	3.93968
66				104.829	5.07559		102.423	3.31988
67				105.064	4.70291		102.024	3.47744
68				105.124	4.84075		102.238	3.63268
69				105.542	4.78288		102.556	4.02605
70				105.16	5.16664		102.456	3.51772
71				105.601	5.6009		102.61	3.51949
72				105.937	5.48477		102.443	3.79597
73				106.053	5.50497		102.188	4.10319
74				105.99	5.6957		102.428	3.95655
75				106.066	5.38255		102.795	3.92075
76				106.13	5.63469		102.07	3.94041
77				105.673	5.44667		102.873	4.08801
78				106.351	5.53778		102.804	4.54267
79				105.951	5.88349		102.946	4.08095
80				106.603	5.76617		102.892	4.08176
81				106.165	5.61262		103.11	4.07127
82				106.069	5.51107		102.347	4.17727
83				106.298	5.58972		102.132	4.04459
84				106.721	5.69179		102.1	3.52731
85				107.264	6.02834		102.285	3.95617
86				107.148	5.81763		102.163	3.99022
87				107.148	5.99096		102.385	3.54133
88				107.462	5.88246		102.443	3.96717
89				107.39	6.16533		102.667	3.82491
90				106.905	6.36042		102.113	3.66544
91				106.781	6.68485		102.638	4.07658
92				106.891	6.30654		102.973	4.0694
93				107.352	6.29385		102.7	3.83746
94				107.154	5.95515		102.766	3.83057
95				107.304	6.20572		102.83	3.51807
96				107.802	5.9494		102.903	3.63385
97				107.863	6.27992		102.828	3.48564
98				107.65	6.02838		103.011	3.52581
99				107.585	6.38225		102.394	4.17927
100				107.752	6.52227		102.967	4.23076
101				107.378	6.39981		102.625	4.10186
102				107.465	6.60496		102.789	3.96708
103				107.224	6.57578		103.437	4.25543
104				107.716	6.60774		103.043	3.98866
105				107.891	6.24958		102.59	4.34638
106				107.861	6.80136		103.404	4.298
107				107.713	6.72507		102.897	4.42972
108				108.086	6.14546		102.834	4.67913
109				107.876	6.26059		103.045	4.27956
110				108.165	6.37729		102.7	4.6853
111				107.897	5.89283		103.471	4.04642
112				108.132	6.06808		102.957	4.71459
113				108.69	6.79805		102.902	4.26681
114				108.402	6.47797		103.607	4.43179
115				108.571	6.26745		103.125	4.36078
116				108.616	6.08947		103.483	4.76011
117				108.7	6.40802		103.144	4.37389
118				108.497	6.61418		102.919	4.22336
119				109.017	6.25019		103.47	4.58411
120				108.806	5.7616		102.937	4.07716
