# Supplementary material for: A mechano-osmotic feedback couples cell volume to the rate of cell deformation
Source: eLife journal article supplement (doi:10.7554/elife.72381), 2022-04-13
Supplement: supp [file 3t3_atcc_V_A.xlsx]

## Sheet: volume
	1												2					3
	Stat4 - Lineage 3	Stat4 - Lineage4	Stat7 - Lineage 2	Stat8 - Lineage 1	Stat8 - Lineage4	Stat8 - Lineage 6	Stat9 - Lineage 2	Stat9 - Lineage 3	Stat10-1 - Lineage 1	Stat10-2 - Lineage 4	Stat11-1 - Lineage 1	Stat11-2 - Lineage 1	Stat12 - Lineage 3	Stat12 - Lineage 7	Stat13 - Lineage 1	Stat13 - Lineage 2	Stat13 - Lineage 3	Stat3 - Lineage 2	Stat9 - Lineage 4	Stat9 - Lineage 6
-10.1805	-14.6345	-26.6331	-19.4179	-8.3888	-6.59891	3.43668	-3.04522	-16.9977	-2.08864	-7.43653	-0.784203	-23.1065	-8.03323	-8.78808	-5.38707	-13.06	-15.3471	-40.7412	-22.2576	1.16247
3.22257
0	1273.47	2186.09	1574.82	2014.1	1456.39	1642.24	1276.41	1495.1	2073.23	1432.61	1243.27	2083.14	1817.21	1172	1138.68	1793.26	1196.17	3270.86	1968.32	1622.13
1	1261.27	2130.35	1565.04	2035.3	1506.97	1596.16	1296.6	1479.39	2068.47	1384.57	1250.32	2082.65	1805.38	1176.1	1139.28	1814.2	1202.84	3263.72	1959.47	1578.64
2	1257.37	2107.84	1579.29	2031.56	1467.29	1606.73	1277.98	1477.8	2082.68	1358.91	1260.44	2070.88	1808.62	1155.81	1170.21	1778.99	1196.1	3252.18	1910.74	1576.95
3	1234.59	2047.34	1542.75	2017.83	1457.12	1549.76	1278.92	1482.97	2105.15	1343.4	1242.2	2000.1	1824.18	1149.88	1121.23	1784.21	1166.94	3197.94	1925.22	1558.79
4	1221.79	2004.35	1536.51	1986.96	1453.38	1590.64	1275.6	1453.02	2066.23	1313.91	1244.21	2001.9	1822.06	1130.68	1097.05	1745.67	1175.96	3133.33	1861.8	1583.85
5	1204.41	1988.55	1538.05	1989.91	1399.66	1635.81	1270.49	1453.32	2096.42	1335.49	1236.64	1949.96	1789.52	1107.89	1092.4	1761.15	1140.25	3105.08	1870.44	1564.07
6	1181.13	1951.37	1485.65	1995.44	1434.21	1619.6	1274.81	1427.66	2078.64	1323.56	1246.41	1929.7	1779.32	1082.3	1088.6	1725.91	1118.51	3048.79	1810.45	1564.3
7	1166.56	1960.51	1452.43	1962.18	1420.53	1605.96	1268.58	1387.6	2081.72	1311.41	1229.88	1930.43	1814.57	1090.35	1099.56	1716.77	1117.43	3006.09	1796.62	1578.66
8	1169.44	1926.58	1439.54	1964.9	1421.96	1630.84	1263.54	1339.36	2091.13	1313.12	1240.27	1899.93	1776.68	1093.91	1089.82	1685.89	1113.98	2953.86	1793.07	1603.74
9	1145.85	1927.51	1414.88	1944.18	1421.1	1637.12	1260.18	1342.72	2078.48	1342.98	1257.14	1859.49	1739.6	1094.11	1106.02	1730.03	1073.47	2934.56	1757.33	1591.99
10	1131.95	1916.51	1397.91	1963.01	1425.58	1642.34	1251.51	1356.77	2021.09	1340.61	1237.14	1898.2	1724.67	1114.88	1105.37	1660.07	1042.59	2910.52	1772.68	1616.91
11	1126.64	1930.94	1407.66	1974.34	1419.06	1644.97	1284.34	1350.14	1987.6	1341.86	1228.75	1911.08	1730.01	1084.53	1133.37	1634.93	1025.83	2929.06	1702.6	1633.01
12	1123.77	1885.43	1400.55	1971.18	1427.61	1621.53	1274.23	1354.23	1944.68	1337.3	1227.27	1903.38	1695.9	1084.98	1138.91	1676.5	1036.13	2934.7	1674.69	1658.37
13	1116.23	1915.55	1419.86	1919.71	1401.84	1652.59	1259.92	1363.04	1867.22	1364.78	1218.2	1925.09	1705.26	1091.26	1135.22	1650.55	1030.29	2863.09	1625.22	1672.89
14	1125.09	1950.11	1412.6	1935.32	1423.77	1663.06	1255.05	1355.19	1839.97	1321.04	1239.37	1930.57	1692.02	1071.92	1172.36	1701.62	1033.55	2809.04	1592.66	1666.99
15	1109.02	1966.51	1392.15	1890.61	1415.44	1619.17	1273.73	1388.75	1809.2	1346.59	1230.86	1886.28	1678.33	1094.75	1129.25	1602.92	1037.3	2788.96	1565.55	1691.2
16	1125.92	1996.27	1385.74	1871.33	1411.37	1623.39	1305.07	1382.4	1818.43	1364.07	1222.97	1917.44	1689.01	1083.28	1185.98	1615.14	1059.32	2760.66	1554.27	1673.93
17	1112.86	2029.62	1376.36	1860.55	1416.84	1603.28	1261.28	1375.88	1813.94	1363.95	1215.02	1907.9	1633.95	1070.53	1180.07	1667.49	1062.47	2720.83	1539.4	1673.53
18	1094.27	2028.75	1356.63	1864.56	1377.92	1585.6	1291.89	1380.05	1808.93	1354.84	1227.53	1893.68	1676.25	1055.79	1194.16	1596.26	1071.77	2790.85	1562.71	1612.39
19	1089.87	2027.28	1412.83	1870.25	1423.33	1566.4	1296.42	1396.72	1802.8	1381.69	1237.17	1909.72	1653.53	1084.98	1168.55	1635.73	1063.18	2766.04	1485.13	1595.02
20	1120.04	2020.04	1389.13	1857.46	1400.28	1587.09	1297.73	1398.13	1774.86	1379.63	1264.46	1925.4	1645.58	1083.63	1169.24	1610.89	1061.12	2724.98	1500.81	1565.51
21	1108.65	2049.64	1411.37	1892.23	1391.84	1556.48	1285.41	1388.9	1791.99	1391.15	1233	1924.79	1666.65	1058.85	1231.94	1614.67	1076.07	2715.34	1509.18	1572.57
22	1129.11	2063.96	1371.08	1799.87	1367.44	1553.94	1277.33	1427.33	1781.34	1389.64	1219.24	1919.05	1635.46	1050.02	1202.22	1647.52	1124.94	2733.29	1502.57	1585.59
23	1148.39	2048.16	1392.84	1778.87	1369.07	1549.07	1298.76	1478.76	1764.17	1394.63	1228.17	1896.74	1639.15	1061.19	1224.18	1682.73	1107.14	2767.2	1554.29	1575.04
24	1109.28	2033.63	1391.36	1732.25	1406.85	1524.25	1333.48	1463.1	1771.84	1398.62	1246.76	1924.72	1622.47	1058.66	1154.35	1684.24	1120.18	2714.02	1482.83	1564.99
25	1125.31	2027.29	1395.35	1731.26	1385.04	1569.53	1311.67	1483.41	1771.36	1416.89	1251.92	1902.67	1620.84	1052.41	1171.28	1605.27	1119.1	2692.04	1547.21	1625.82
26	1148.89	2056.39	1421.04	1730.23	1344.29	1541.83	1326.63	1501.84	1723.85	1400.49	1214.19	1896.79	1620.94	1048.34	1260.02	1640.98	1104.15	2760.05	1582.6	1647.42
27	1156.96	2039.63	1358.99	1694.29	1390.4	1520.49	1339.96	1512.27	1705.58	1435.29	1224.7	1897.77	1607.62	1028.99	1216.28	1588.69	1131.96	2765.82	1587.06	1638.77
28	1158.8	2013.27	1401.12	1672.86	1393.47	1506.69	1338.8	1525.48	1711.73	1456.26	1223.69	1857.8	1591.36	1038.28	1286.16	1579.15	1128.84	2735.34	1624.25	1652.97
29	1144.72	2012.09	1345.95	1637.62	1375.07	1474.06	1327.54	1498.98	1702.18	1462.23	1199.6	1915.58	1627.84	1062.42	1208.31	1613.93	1129.23	2716.1	1606.32	1644.81
30	1169.57	2003.02	1353.48	1635.71	1388.47	1520.03	1301.48	1533.59	1712.37	1409.2	1197.06	1919.6	1622.4	1047.89	1326.66	1639.07	1114.28	2688.13	1580.6	1695.65
31	1180.47	1970.82	1326.69	1648.94	1380.07	1528.17	1279.38	1567.41	1710	1438.7	1209.84	1953.45	1615.92	1033.3	1352.19	1587.95	1113.88	2584.11	1573.9	1717.17
32	1177.36	1976.73	1364.88	1615.66	1350.85	1511.56	1280.64	1546.71	1731.48	1438.87	1215.47	1915.34	1656.39	1064.62	1314.26	1620.19	1151.19	2575.25	1557.92	1742.41
33	1197.42	2027.05	1364.57	1620.57	1368.06	1475.05	1304.84	1541.87	1682.23	1461.68	1206.25	1923.66	1641.79	1054.03	1336.98	1625.6	1134.5	2765.75	1494.85	1775.13
34	1197.43	2051.79	1364.35	1611.29	1345.7	1474.42	1279.13	1563.72	1659.45	1481.11	1199.77	1915.35	1596.32	1037.56	1336.65	1621.83	1103	2725.44	1537.02	1773.28
35	1215.61	1991.31	1347.14	1604.89	1346.08	1483.38	1271.32	1551.72	1675.14	1492.57	1173.39	1942.58	1614.1	1052.86	1324.81	1648.2	1146.83	2708.79	1489.06	1727.28
36	1203.53	1998.56	1361.11	1532.58	1332.41	1443.08	1300.46	1572.66	1689.06	1509.14	1198.98	1876.28	1579.54	1046.06	1318.47	1673.04	1187.16	2664.38	1449.46	1798.68
37	1225.85	1982.65	1331.59	1613.93	1328.85	1431.72	1281.23	1630.54	1675.21	1490.71	1200.36	1873.37	1558.2	1037.46	1323.75	1678.08	1141.81	2731.21	1433.72	1815.17
38	1222.37	2006.32	1359.78	1610.33	1331.11	1409.69	1300.47	1597.11	1682.58	1492.91	1205.43	1920.96	1553.34	1023.53	1334.84	1606.84	1158.83	2789.06	1459.49	1778.9
39	1251.23	1979.23	1351.45	1572.87	1301.7	1395.63	1306.68	1635.5	1703.38	1519.35	1201.45	1900.3	1585.29	1053.42	1323.23	1661.52	1154.1	2763.29	1430.65	1834.27
40	1242.98	1988.49	1367.84	1567.39	1341.5	1439.33	1289.33	1611.74	1708.63	1520.18	1179.02	1902.19	1613.92	1023.76	1292.32	1641.13	1189.25	2717.46	1415.39	1837.73
41	1261.58	1951.02	1358.16	1578.99	1314.22	1408.21	1250.03	1649.03	1702.65	1516.08	1188.66	1873.25	1586.94	1036.61	1294.37	1637.22	1200.91	2702.41	1459.39	1804.44
42	1241.9	1986.56	1366.29	1556.24	1341.42	1423.27	1256.66	1593.33	1708.03	1525.59	1183.94	1875.34	1593.1	1059.15	1331.78	1599.69	1178.99	2702.46	1464.19	1844.4
43	1248.4	1969.17	1329.75	1555.37	1342.1	1426.59	1248.85	1602.9	1657.83	1525.58	1201.92	1878	1584.71	1032.23	1296.86	1643.91	1169.21	2695.22	1487.08	1830.44
44	1267.51	1897.62	1356.56	1491.8	1340.68	1398.77	1269.76	1645.99	1715.27	1520.01	1193.68	1857.68	1571.76	1047.97	1346.41	1586.51	1198.36	2754.84	1502.38	1785.28
45	1255.92	1930.78	1338.47	1524.47	1380.99	1388.93	1273.67	1569	1683.68	1483.81	1220.29	1879.74	1597.53	1051.37	1298.34	1589.44	1195.34	2837.6	1527.42	1823.65
46	1264.78	1956.11	1329.21	1521.79	1343.19	1403.85	1281.46	1613.83	1685.95	1520.39	1189.87	1877.05	1588.67	1014.62	1271.18	1643.13	1162.94	2688.78	1562.81	1836.21
47	1262.34	1890.42	1372.46	1482.01	1332.8	1392.87	1246.27	1615.94	1709.42	1495.64	1192.06	1865.29	1576.5	1026.78	1276.77	1588.79	1202.75	2669.96	1587.51	1882.47
48	1262.95	1909.55	1364.37	1483.24	1361.3	1334.75	1235.64	1607.82	1716.15	1505.1	1193.61	1866.58	1569.15	1018.04	1291.85	1599.47	1208.59	2722.02	1575.76	1859.91
49	1291.51	1954.79	1350.39	1454.28	1337.65	1352.39	1256.52	1612.41	1730.39	1507.98	1217.21	1887.05	1564.4	994.958	1305.88	1612.78	1228.89	2774.79	1625.23	1883.22
50	1298.97	1968.15	1361.11	1443.19	1390.24	1371.21	1278.79	1587.42	1679.35	1500.89	1194.52	1860.53	1596.31	1011.27	1264.21	1670.38	1201.06	2801.74	1600.48	1861.24
51	1302.11	1928.47	1358.76	1451.25	1364.68	1438.2	1260.25	1581.66	1724.39	1502.53	1187.98	1875.65	1565.96	990.359	1275.69	1674.44	1208.36	2721.07	1575.22	1862.36
52	1312.75	1868.02	1383.54	1405	1394.82	1385.85	1265.92	1583.2	1683.84	1522.79	1198.39	1862.01	1531.19	995.335	1284.03	1628.38	1207.59	2792.37	1568.38	1850.78
53	1307.5	1919.26	1375.62	1393.94	1385.32	1404.59	1213.97	1614.68	1708.02	1537.64	1186.72	1878.66	1530.29	997.758	1309.11	1648.64	1211.75	2695.02	1613.83	1849.7
54	1313.93	1929.71	1338.46	1420.3	1360.47	1413.38	1228.59	1589.91	1704.32	1527.71	1187.23	1864.47	1539.05	994.101	1319.02	1673.56	1203	2598.75	1564.6	1886.07
55	1328.6	1957.65	1366.32	1427.37	1392.41	1424.37	1286.37	1580.91	1747.76	1522.78	1185.17	1843.01	1535.52	998.068	1283.86	1652.11	1220.66
56	1342.56	1933.35	1335.07	1457.49	1385.96	1408.62	1225.06	1627.58	1779.61	1537.62	1186.75	1835.35	1499.49	970.083	1290.13	1595.53	1214.61
57	1333.01	1913.46	1353.55	1571.81	1370.2	1385.88	1257.84	1596.01	1742.92	1552.16	1161.8	1875.99	1514.15	1006.46	1272.48	1773.18	1188.48
58	1370.3	1966.18	1361.18	1426.48	1357.54	1410.59	1245.66	1628.34	1782.15	1552.19	1171.73	1880.36	1500.08	1012.59	1271.17	1659.36	1223.66
59	1337.32	1890.08	1370.45	1599.89	1351.29	1397.87	1218.75	1622.89	1796.02	1524.23	1183.45	1895.68	1497.15	996.277	1293.78	1635.48	1188.94
60	1349.07	1963.43	1345.34	1611.45	1339.99	1434.9	1229.99	1600.97	1829.34	1552.8	1195.12	1892.57	1516.21	1019.12	1318.31	1677.94	1184.4
	100	100	100	100	100	100	100	100	100	100	100	100	100	100	100	100	100	100	100	100		100
	99.0417	97.45	99.3786	101.053	103.473	97.1945	101.582	98.9496	99.7706	96.6463	100.567	99.9762	99.3489	100.35	100.053	101.168	100.558	99.7817	99.5503	97.3192		99.6605
	98.736	96.4204	100.284	100.867	100.748	97.838	100.123	98.8429	100.456	94.8552	101.381	99.4113	99.5271	98.6188	102.769	99.2041	99.994	99.4288	97.0748	97.2152		99.1897
	96.9468	93.6529	97.9634	100.185	100.05	94.3691	100.196	99.1886	101.54	93.7724	99.9137	96.0136	100.383	98.1127	98.4671	99.4955	97.5562	97.7706	97.8105	96.0952		97.9741
	95.9416	91.6866	97.5673	98.6521	99.7931	96.8581	99.936	97.1855	99.6625	91.7139	100.075	96.1	100.267	96.4745	96.3434	97.3461	98.3107	95.7954	94.5881	97.6405		97.0969
	94.5771	90.9638	97.6647	98.7988	96.1047	99.6084	99.5355	97.206	101.118	93.2209	99.4665	93.6065	98.4761	94.5298	95.9357	98.2094	95.3253	94.9317	95.0272	96.421		96.5364
	92.7488	89.263	94.3378	99.0736	98.4766	98.6216	99.8741	95.4897	100.261	92.388	100.253	92.6342	97.9149	92.3462	95.6018	96.2444	93.5073	93.2107	91.9795	96.4352		95.533
	91.6047	89.681	92.2283	97.4222	97.5379	97.7909	99.3858	92.8097	100.41	91.5398	98.9229	92.669	99.8542	93.033	96.5642	95.7346	93.417	91.9053	91.2766	97.3205		95.0554
	91.8313	88.1291	91.4092	97.5569	97.636	99.306	98.9916	89.5834	100.863	91.6592	99.759	91.2053	97.7695	93.3374	95.7084	94.0125	93.1288	90.3084	91.0966	98.8666		94.6079
	89.9788	88.1717	89.8439	96.5283	97.5766	99.6886	98.7284	89.8081	100.253	93.7436	101.116	89.2637	95.7287	93.3543	97.1315	96.474	89.7427	89.7182	89.2809	98.1422		94.2137
	88.8866	87.6684	88.7658	97.4633	97.8844	100.006	98.0492	90.7479	97.4851	93.578	99.5072	91.1219	94.9073	95.1263	97.0745	92.5726	87.161	88.9834	90.0603	99.6783		93.8364
	88.4699	88.3284	89.385	98.026	97.4368	100.167	100.621	90.3044	95.8695	93.6651	98.8325	91.7404	95.201	92.5367	99.5335	91.171	85.7598	89.5502	86.5001	100.671		93.6884
	88.2446	86.2469	88.9336	97.8687	98.024	98.7393	99.8289	90.5781	93.7997	93.347	98.7133	91.3708	93.3241	92.5754	100.02	93.4888	86.6207	89.7226	85.082	102.234		93.4382
	87.6526	87.6247	90.1597	95.3135	96.2544	100.63	98.7075	91.167	90.0634	95.2649	97.9835	92.4127	93.839	93.1105	99.6963	92.042	86.1321	87.5331	82.5689	103.129		93.0643
	88.3483	89.2053	89.6991	96.0883	97.7598	101.268	98.3263	90.6423	88.7491	92.2119	99.6864	92.6757	93.1105	91.4611	102.957	94.8897	86.4051	85.8809	80.9146	102.766		93.1523
	87.0866	89.9554	88.4001	93.8684	97.1878	98.5953	99.7894	92.887	87.265	93.9956	99.0019	90.5497	92.3573	93.4088	99.1719	89.3859	86.7182	85.2667	79.5372	104.258		92.4343
	88.4132	91.317	87.9935	92.9114	96.9087	98.8527	102.245	92.4624	87.7097	95.2155	98.3669	92.0456	92.945	92.4303	104.154	90.067	88.559	84.4017	78.9645	103.193		92.9578
	87.3881	92.8426	87.3975	92.3761	97.284	97.6277	98.8143	92.0259	87.4936	95.2073	97.7275	91.5877	89.915	91.3425	103.635	92.9868	88.8231	83.1839	78.2086	103.169		92.4518
	85.9278	92.8025	86.1446	92.5752	94.6116	96.5512	101.212	92.3048	87.2519	94.5714	98.7341	90.905	92.2426	90.0848	104.872	89.0143	89.6002	85.3246	79.3928	99.3996		92.1762
	85.5829	92.7352	89.7135	92.8576	97.7296	95.3821	101.568	93.4198	86.9563	96.4456	99.5097	91.6751	90.9925	92.5749	102.623	91.2156	88.8817	84.5661	75.4516	98.3288		92.4105
	87.9516	92.4041	88.2086	92.2229	96.1471	96.6422	101.67	93.5146	85.6085	96.3013	101.704	92.4278	90.5553	92.4601	102.683	89.8303	88.7102	83.3109	76.2484	96.5099		92.2556
	87.0575	93.7582	89.6209	93.9491	95.5673	94.7781	100.705	92.897	86.4345	97.1061	99.1737	92.3984	91.7144	90.3457	108.19	90.0411	89.9596	83.0162	76.6734	96.9451		92.5165
	88.6643	94.4131	87.0623	89.3635	93.8923	94.6237	100.072	95.4671	85.9208	97.0003	98.067	92.123	89.9983	89.5919	105.58	91.8727	94.0449	83.5648	76.3379	97.7477		92.2704
	90.1779	93.6904	88.444	88.3206	94.0045	94.3269	101.751	98.9071	85.0928	97.3484	98.7858	91.0517	90.2014	90.5448	107.508	93.8363	92.5571	84.6018	78.9652	97.0974		92.8607
	87.1072	93.026	88.3504	86.006	96.5982	92.8155	104.471	97.8597	85.4629	97.6274	100.281	92.3952	89.2832	90.3296	101.376	93.9204	93.6474	82.9757	75.3348	96.4777		92.2673
	88.3659	92.7356	88.6032	85.9566	95.1009	95.5725	102.762	99.2185	85.4395	98.9026	100.696	91.3365	89.1938	89.7957	102.863	89.5167	93.5572	82.3038	78.6057	100.227		92.5376
	90.2173	94.067	90.2348	85.906	92.3029	93.8863	103.934	100.451	83.148	97.7577	97.6612	91.0542	89.1989	89.4488	110.656	91.5083	92.3075	84.3829	80.4036	101.559		93.0043
	90.8506	93.3002	86.2946	84.1214	95.4688	92.5865	104.978	101.149	82.2667	100.187	98.5064	91.1016	88.4661	87.7977	106.815	88.5921	94.6323	84.5595	80.63	101.026		92.6665
	90.9956	92.0946	88.9699	83.0573	95.6792	91.7463	104.887	102.032	82.5633	101.651	98.4253	89.1826	87.5715	88.5906	112.952	88.0604	94.3709	83.6276	82.5194	101.902		93.0439
	89.89	92.0407	85.4669	81.3079	94.4163	89.7596	104.005	100.259	82.1027	102.067	96.4875	91.9565	89.5787	90.6497	106.115	90	94.4036	83.0395	81.6086	101.398		92.3276
	91.8413	91.6258	85.9451	81.2128	95.3361	92.5587	101.964	102.575	82.5944	98.3655	96.2834	92.1494	89.2795	89.4107	116.508	91.4018	93.1538	82.1843	80.302	104.532		92.9612
	92.697	90.1529	84.2438	81.8695	94.7596	93.0541	100.232	104.836	82.4799	100.425	97.3108	93.7741	88.9227	88.1659	118.75	88.5507	93.1206	79.0039	79.9617	105.859		92.9085
	92.4526	90.4231	86.6684	80.2171	92.753	92.0431	100.331	103.452	83.5159	100.437	97.764	91.9448	91.1501	90.8381	115.419	90.3489	96.2398	78.733	79.1499	107.415		93.0648
	94.0281	92.7248	86.6489	80.4612	93.9346	89.8197	102.227	103.128	81.1403	102.029	97.022	92.3443	90.3465	89.9343	117.414	90.6503	94.8447	84.5573	75.9456	109.432		93.4317
	94.029	93.8565	86.6349	80.0006	92.3994	89.7811	100.213	104.59	80.0417	103.385	96.5011	91.9451	87.8444	88.529	117.386	90.4404	92.2109	83.3249	78.088	109.318		93.026
	95.4567	91.0899	85.5423	79.6827	92.4254	90.3269	99.6005	103.787	80.7987	104.185	94.3789	93.2524	88.8229	89.8348	116.346	91.9106	95.8752	82.8157	75.6513	106.482		92.9133
	94.5079	91.4215	86.4291	76.0925	91.4869	87.8729	101.884	105.188	81.47	105.342	96.4375	90.0698	86.9209	89.2538	115.789	93.2962	99.2469	81.458	73.6395	110.884		92.9345
	96.2602	90.6937	84.5548	80.1312	91.2425	87.1813	100.377	109.059	80.8021	104.056	96.5487	89.93	85.7467	88.5204	116.252	93.5773	95.4558	83.5013	72.8398	111.901		92.9316
	95.987	91.7768	86.3448	79.9526	91.3976	85.8395	101.885	106.823	81.1572	104.209	96.9563	92.2144	85.4789	87.3319	117.226	89.6044	96.8788	85.27	74.1491	109.665		93.0074
	98.2532	90.5372	85.8161	78.0929	89.3785	84.9836	102.371	109.391	82.1607	106.054	96.6363	91.2227	87.2375	89.8818	116.207	92.6533	96.4833	84.4821	72.6836	113.078		93.3802
	97.6058	90.9608	86.8568	77.8207	92.1109	87.6443	101.012	107.802	82.4141	106.112	94.832	91.3137	88.813	87.3516	113.492	91.5167	99.4217	83.0808	71.9087	113.292		93.268
	99.0659	89.2469	86.242	78.3966	90.2379	85.7495	97.933	110.296	82.1255	105.826	95.6078	89.9241	87.3281	88.4477	113.673	91.2985	100.396	82.6207	74.1437	111.239		92.9899
	97.5208	90.8725	86.7579	77.267	92.1054	86.6667	98.4523	106.57	82.385	106.49	95.228	90.0244	87.6671	90.3714	116.958	89.2055	98.5641	82.6224	74.3877	113.702		93.1909
	98.0309	90.0773	84.4381	77.224	92.1521	86.8689	97.8406	107.21	79.9637	106.489	96.6742	90.1522	87.2054	88.0741	113.891	91.6713	97.7458	82.401	75.5507	112.842		92.8251
	99.532	86.8041	86.1403	74.0677	92.0547	85.1746	99.4786	110.093	82.7343	106.101	96.0114	89.1769	86.4925	89.4169	118.243	88.471	100.183	84.2236	76.328	110.058		93.0392
	98.622	88.3213	84.9919	75.6898	94.8229	84.5756	99.7852	104.943	81.2105	103.574	98.1517	90.2359	87.9111	89.7069	114.021	88.6342	99.9309	86.7541	77.6002	112.424		93.0953
	99.3173	89.4796	84.4037	75.5567	92.2274	85.4842	100.395	107.941	81.3201	106.127	95.7046	90.1069	87.4232	86.572	111.636	91.6282	97.2219	82.2042	79.3983	113.198		92.8672
	99.1263	86.4751	87.1497	73.5816	91.5137	84.8153	97.6381	108.083	82.4518	104.4	95.8814	89.5424	86.7535	87.6095	112.127	88.5978	100.551	81.6287	80.6532	116.049		92.7314
	99.1735	87.3499	86.6365	73.6426	93.4704	81.2766	96.8054	107.539	82.7765	105.06	96.0059	89.6039	86.3491	86.8634	113.452	89.1933	101.038	83.2205	80.0561	114.659		92.7086
	101.417	89.4192	85.7486	72.2047	91.8465	82.3507	98.4412	107.846	83.4636	105.261	97.904	90.5866	86.0875	84.894	114.684	89.9357	102.735	84.8335	82.5693	116.096		93.4162
	102.002	90.0307	86.4295	71.6543	95.458	83.4962	100.186	106.175	81.0018	104.766	96.0786	89.3137	87.8437	86.2858	111.024	93.1477	100.409	85.6576	81.3121	114.741		93.3506
	102.249	88.2153	86.28	72.0542	93.7027	87.576	98.7336	105.789	83.1743	104.88	95.5527	90.0395	86.1736	84.5016	112.032	93.3743	101.019	83.1911	80.0287	114.81		93.1688
	103.085	85.4503	87.8534	69.7579	95.7723	84.388	99.1775	105.893	81.218	106.295	96.3897	89.3845	84.2602	84.9262	112.764	90.8055	100.955	85.3713	79.681	114.096		92.8761
	102.672	87.7943	87.3505	69.2088	95.12	85.5292	95.1079	107.998	82.3842	107.331	95.4512	90.1842	84.211	85.1329	114.967	91.9355	101.302	82.3949	81.9902	114.03		93.1048
	103.177	88.2723	84.9911	70.5177	93.4138	86.0643	96.253	106.342	82.2061	106.638	95.4923	89.503	84.6927	84.8209	115.837	93.3247	100.571	79.4515	79.489	116.272		92.8665
	104.329	89.5502	86.7599	70.869	95.6067	86.7336	100.78	105.739	84.3011	106.294	95.3271	88.4726	84.4985	85.1594	112.75	92.1287	102.048					93.6086
	105.425	88.4389	84.7758	72.3643	95.1636	85.7743	95.9766	108.861	85.8374	107.33	95.4538	88.1049	82.5156	82.7715	113.3	88.9739	101.541					93.0946
	104.675	87.5289	85.9493	78.0402	94.0816	84.3897	98.5446	106.75	84.0678	108.345	93.4472	90.0557	83.3224	85.8758	111.751	98.8802	99.3573					93.8271
	107.604	89.9407	86.4339	70.8246	93.2126	85.8947	97.5908	108.912	85.9601	108.347	94.2462	90.2657	82.5484	86.3983	111.635	92.5333	102.298					93.8027
	105.014	86.4594	87.0222	79.4344	92.7831	85.1197	95.4825	108.547	86.6293	106.395	95.1888	91.0011	82.387	85.0065	113.62	91.2015	99.3958					93.5699
	105.936	89.8145	85.428	80.0083	92.0071	87.3748	96.3631	107.081	88.236	108.389	96.1272	90.8519	83.4359	86.9555	115.775	93.5692	99.0159					94.4923

## Sheet: area
	1												2					3
	Stat4 - Lineage 3	Stat4 - Lineage4	Stat7 - Lineage 2	Stat8 - Lineage 1	Stat8 - Lineage4	Stat8 - Lineage 6	Stat9 - Lineage 2	Stat9 - Lineage 3	Stat10-1 - Lineage 1	Stat10-2 - Lineage 4	Stat11-1 - Lineage 1	Stat11-2 - Lineage 1	Stat12 - Lineage 3	Stat12 - Lineage 7	Stat13 - Lineage 1	Stat13 - Lineage 2	Stat13 - Lineage 3	Stat3 - Lineage 2	Stat9 - Lineage 4	Stat9 - Lineage 6
71.3901	50.9602	123.278	58.9819	82.6992	57.1836	102.153	50.3078	99.8669	29.656	58.8146	31.0109	72.4395	38.4161	23.2133	33.5524	44.5128	67.2921	124.961	88.3306	37.8185
10.338
0	57.931	72.7	76.965	100.366	251.383	502.662	53.251	103.382	50.651	315.347	68.436	567.978	93.814	237.966	507.03	560.49	253.879	156.321	434.226	414.465
1	79.461	94.958	100.886	187.107	275.305	741.877	63.86	129.592	68.436	372.966	87.469	636.934	112.223	246.495	488.517	520.759	211.757	217.581	550.921	421.433
2	93.814	247.847	107.854	224.029	265.216	834.65	83.829	152.577	97.766	601.468	96.83	720.243	144.361	255.023	553.729	640.783	286.953	355.805	742.085	464.7
3	270	386.383	113.159	275.201	375.047	1012.5	212.797	152.473	82.893	714.731	129.488	797.728	202.604	308.587	591.484	747.389	363.918	820.817	676.769	504.118
4	339.892	448.579	228.71	407.913	550.297	1122.23	240.982	248.991	95.374	838.602	214.461	929.192	238.694	285.081	581.083	882.805	434.642	880.517	802.824	574.323
5	375.151	532.096	283.209	514.519	614.157	1236.63	282.897	340.62	93.606	819.673	245.871	1065.54	266.464	382.743	552.481	1022.49	505.47	935.432	1017.6	612.389
6	391.896	731.164	317.843	615.405	695.178	1213.96	353.517	449.203	131.88	834.858	247.015	1027.58	251.279	409.681	734.7	882.389	609.373	1052.96	1000.64	617.173
7	423.513	793.776	357.469	739.38	638.182	1431.44	355.909	692.786	172.546	812.393	280.089	1269.5	312.851	460.644	697.05	862.316	703.186	1057.54	1123.48	632.462
8	419.353	897.262	450.971	743.021	677.913	1424.26	358.51	825.394	231.934	924.928	329.492	1130.76	399.8	454.195	747.285	796.688	737.3	1199.92	1183.9	740.212
9	512.127	1142.92	632.462	807.609	649.519	1438.72	523.047	962.162	302.45	879.789	315.971	1177.77	464.18	408.849	773.39	902.462	793.568	1355.51	1262.32	816.553
10	565.794	1337.31	627.886	884.781	828.202	1652.87	548.113	974.539	392.208	971.418	361.526	1274.29	457.523	413.529	828.202	1094.98	827.994	1359.47	1325.04	705.162
11	621.333	1399.72	683.737	926.072	752.277	1716.52	625.494	997.524	408.121	1003.45	366.518	1080.21	500.27	476.973	768.294	923.68	857.532	1476.58	1254	804.176
12	603.548	1517.87	830.906	975.995	915.255	1710.59	638.598	1060.34	509.839	994.612	359.134	1306.42	591.276	484.253	840.891	1031.33	811.977	1455.05	1555.52	798.872
13	622.581	1401.17	881.245	1021.24	887.797	1627.49	646.919	1110.16	628.926	1038.81	396.784	1249.84	589.819	574.01	835.482	1045.58	969.442	1566.13	1624.89	844.427
14	682.177	1559.68	985.771	1072.2	962.994	1613.45	721.283	1188.79	719.619	1116.4	452.011	1498.94	616.861	673.024	898.718	1057.43	937.2	1644.23	1554.89	897.47
15	649.519	1588.07	1039.65	1245.79	1003.45	1626.03	711.299	1206.47	695.802	1240.38	439.53	1374.34	620.189	642.239	1020.2	1145.53	984.419	1634.77	1776.84	1133.98
16	779.943	1476.77	1099.14	1185.36	997.836	1785.37	830.178	1422.08	847.027	1232.68	465.844	1498.31	636.622	663.872	938.656	1288.53	986.603	1614.59	1834.46	1110.47
17	724.404	1640.18	1240.8	1313.6	1137.1	1666.7	923.159	1402.94	827.786	1209.18	485.605	1359.57	709.947	696.01	959.25	1202.31	965.698	1609.29	1813.14	1188.17
18	805.424	1674.71	1272.93	1302.05	1028.73	1676.89	876.877	1390.67	906.622	1217.08	567.77	1560.61	682.489	743.229	1081.56	1126.91	1068.35	1701.44	1994.84	1185.78
19	765.486	1681.37	1280.73	1404.08	1154.57	1726.4	996.484	1470.65	945.937	1146.36	549.465	1677.62	704.642	835.378	1108.81	1141.88	1083.95	1664.52	1899.05	1250.99
20	790.656	1631.03	1367.37	1409.81	1200.96	1773.62	1079.69	1530.04	947.393	1399.51	506.51	1537.73	740.108	857.324	1035.38	1192.43	1100.07	1720.68	1906.64	1385.99
21	869.076	1677.31	1348.03	1493.95	1148.54	1737.01	1051.92	1423.33	1025.4	1466.8	522.423	1427.9	767.254	887.589	1091.65	1302.05	1018.74	1688.54	2036.65	1228.94
22	874.381	1649.43	1320.15	1470.02	1347.82	1722.13	1175.69	1488.12	1040.69	1271.16	515.351	1484.79	811.873	826.122	1057.74	1188.89	1068.56	1697.8	2007.94	1325.46
23	886.653	1637.37	1440.28	1603.05	1281.46	1731.7	1095.71	1459	1057.54	1179.85	529.288	1390.04	774.223	872.508	1091.55	1342.2	1053.48	1761.24	1936.7	1398.99
24	940.841	1796.29	1483.75	1616.05	1343.97	1749.28	1168.93	1475.22	1024.77	1122.23	569.746	1307.36	837.146	983.691	1099.45	1364.77	1149.89	1775.91	2136.18	1483.03
25	922.847	1821.25	1488.43	1718.6	1434.25	1716.31	1172.57	1477.83	1054.83	1089.26	566.834	1257.02	932	844.635	1095.91	1468.05	1058.06	1746.89	2069.41	1520.99
26	988.059	1861.82	1512.98	1590.98	1408.04	1828.22	1257.02	1598.68	1076.57	1136.06	642.655	1395.87	1011.98	855.451	1172.57	1449.33	1034.97	1717.45	1962.08	1421.87
27	983.379	1755.52	1584.02	1709.76	1419.48	1815.74	1289.37	1623.02	1131.9	1163.93	665.224	1384.01	1097.58	1066.69	1191.29	1428.53	1110.37	1832.59	1975.6	1644.03
28	938.864	1909.24	1591.4	1620.31	1324	1700.09	1422.91	1516.72	1157.49	1085.83	675.521	1468.15	1089.78	1024.05	1277.4	1475.64	1066.69	1965.93	2049.03	1412.61
29	1018.33	1953.03	1624.58	1665.04	1363.21	1818.13	1308.71	1616.98	1103.92	1079.27	702.25	1370.8	1033.51	940.217	1298.62	1417.92	1113.7	1912.88	2068.16	1508.09
30
31
32
33
34	1010.73	1977.06	1428.32	1830.51	1414.8	1743.66	1348.23	1713.71	1276.47	1042.04	688.521	1379.54	1340.95	1083.74	1203.25	1595.35	1063.88	2116.42	2157.19	1634.87
35
36
37
38
39	1113.39	1991.93	1489.58	1847.46	1628.84	1863.48	1394.62	1702.79	1236.11	1051.3	716.083	1555	1377.67	1220.1	1454.53	1560.41	1080.52	1963.43	2326.72	1628.43
40
41
42
43
44	1114.32	1926.4	1563.84	1833.84	1595.56	1700.81	1454.94	1720.26	1279.28	1070.74	864.5	1478.87	1365.91	1080.42	1380.27	1640.18	1070.54	2009.92	2402.13	1604.71
45
46
47
48
49	1244.95	2063.69	1522.96	1850.27	1636.54	1818.55	1486.98	1707.37	1329.72	1189.21	790.135	1747.62	1280.84	1044.43	1405.23	1621.98	1165.39	2215.44	2356.26	1743.04
50
51
52
53
54	1164.87	2130.98	1611.27	1922.56	1611.58	1868.68	1437.26	1838.31	1276.99	1336.48	972.874	1472.62	1543.04	1104.34	1496.86	1629.67	1056.91	2444.04	2524.96	1757.81
55
56
57
58
59	1200.54	2110.39	1708.51	2128.07	1793.48	1961.45	1472.1	1968.73	1354.47	1277.2	986.395	1420.41	1589.53	1163.73	1467.01	1697.38	1125.66
60
