# Supplementary material for: A mechano-osmotic feedback couples cell volume to the rate of cell deformation
Source: eLife journal article supplement (doi:10.7554/elife.72381), 2022-04-13
Supplement: supp [file 20171218_PLL-PEG.xlsx]

## Sheet: Sheet3
V %																					17
1	1	1	1	1	1	1	1	1	1	1	1	1	1	1	1	1	0	1	0	0
1.00295	0.994723	0.986617	1.00572	1.01047	0.969628	0.990778	1.01512	0.989221	0.992171	0.991837	0.993026	1.02034	0.987085	0.987939	0.998716	0.99774	1	0.996122	0.0117922	0.00286002
1.01469	0.992182	0.980374	0.988776	1.0298	0.942079	0.984672	1.02278	0.96856	0.998404	1.00218	0.993587	1.02785	1.01036	0.994273	1.00007	1.01334	2	0.997881	0.021474	0.00520821
1.02057	1.00274	0.972947	1.00026	1.04137	0.931078	0.972264	1.01486	0.967015	1.01015	1.0141	0.987935	1.04122	0.991714	0.984638	0.996208	1.01472	3	0.99787	0.0269066	0.0065258
1.0311	1.00193	0.960988	1.01111	1.03983	0.919765	0.956462	1.0218	0.948635	1.02172	1.04839	0.98898	1.03388	0.99618	0.977991	1.0019	1.03034	4	0.99947	0.0352716	0.00855463
1.03525	1.00315	0.95209	1.0078	1.04559	0.910581	0.956103	1.03066	0.953374	1.0397	1.06237	0.983173	1.0452	0.995731	0.976615	1.01	1.03024	5	1.00221	0.0405931	0.00984527
1.03307	1.00948	0.950933	1.00431	1.05739	0.909625	0.927115	1.01737	0.940784	1.04115	1.08579	0.981799	1.04762	0.996221	0.977097	1.01733	1.03253	6	1.00174	0.0470857	0.01142
1.03467	1.01671	0.956731	1.00824	1.05294	0.910165	0.923745	1.00975	0.938309	1.04254	1.09391	0.970255	1.06989	0.992446	0.981856	1.00963	1.04928	7	1.00359	0.0503498	0.0122116
1.02957	1.01117	0.942782	0.999526	1.04267	0.906799	0.911069	1.01092	0.934494	1.06237	1.10392	0.972021	1.03706	1.00526	0.987034	1.01591	1.04225	8	1.00087	0.052112	0.012639
1.02746	1.02346	0.943977	1.00894	1.03315	0.905144	0.908191	0.990886	0.912709	1.04777	1.10528	0.972427	1.04408	1.00488	0.974381	1.01207	1.05105	9	0.997991	0.0543318	0.0131774
1.03019	1.02008	0.936886	1.022	1.03105	0.906012	0.915395	1.00075	0.918841	1.06535	1.12816	0.966664	1.02854	0.994986	0.973604	1.02481	1.05152	10	1.00087	0.0573563	0.013911
1.04292	1.02955	0.936022	1.01379	1.01719	0.896934	0.914147	0.999997	0.896523	1.06393	1.12687	0.956186	1.03763	0.995164	0.969667	1.01862	1.05569	11	0.998284	0.061288	0.0148645
1.02702	1.03244	0.934394	1.01074	1.01196	0.897721	0.900496	0.983245	0.895905	1.05589	1.1299	0.959306	1.04622	1.00622	0.98819	1.01418	1.06018	12	0.997296	0.0620678	0.0150537
1.0349	1.03182	0.929151	1.03116	1.01259	0.899405	0.894966	0.980382	0.874706	1.0479	1.14749	0.947569	1.04624	0.98585	0.983874	1.02014	1.06272	13	0.995934	0.068199	0.0165407
1.03071	1.01913	0.926278	1.02567	1.00117	0.901906	0.910311	0.977457	0.8834	1.05448	1.13973	0.955851	1.0446	0.989522	0.96347	1.01395	1.0677	14	0.994431	0.0647624	0.0157072
1.02164	1.02702	0.924284	1.03608	0.988096	0.897229	0.898054	0.959832	0.867048	1.04988	1.14475	0.94366	1.04116	0.986518	0.97403	1.02261	1.06061	15	0.990736	0.0688184	0.0166909
1.03895	1.02135	0.931388	1.03668	1.00042	0.897438	0.904374	0.972015	0.870258	1.06728	1.14645	0.939732	1.04848	0.990484	0.984823	1.01768	1.06751	16	0.996194	0.0695391	0.0168657
1.03377	1.02386	0.92215	1.03921	1.00125	0.896126	0.909353	0.962316	0.865348	1.05534	1.14955	0.931488	1.04732	0.976154	0.992665	1.02431	1.06922	17	0.994084	0.0709762	0.0172143
1.04259	1.03332	0.923196	1.03646	1.00185	0.898455	0.897835	0.967716	0.867319	1.05598	1.13705	0.932519	1.05594	0.986989	0.987113	1.02575	1.06579	18	0.995051	0.0703191	0.0170549
1.04735	1.02585	0.923253	1.02912	1.00593	0.905586	0.900278	0.958613	0.879265	1.0593	1.13411	0.932154	1.05937	0.9719	0.986717	1.0195	1.07402	19	0.994842	0.0689558	0.0167242
1.04592	1.03437	0.913628	1.03757	1.00634	0.911469	0.910019	0.956885	0.890392	1.04885	1.13497	0.93289	1.04887	0.979366	0.987676	1.01899	1.08151	20	0.996453	0.0672449	0.0163093
1.04408	1.03286	0.913828	1.04185	1.00407	0.904047	0.912085	0.949503	0.877575	1.05576	1.13818	0.923487	1.05381	0.97358	0.987264	1.01242	1.07109	21	0.993852	0.069903	0.016954
1.05166	1.03506	0.925183	1.04052	0.995851	0.895855	0.901728	0.941575	0.893165	1.03822	1.12022	0.921608	1.06161	0.96912	1.01429	1.00773	1.06496	22	0.992844	0.0672594	0.0163128
1.03129	1.03219	0.922083	1.02948	1.00198	0.898842	0.901144	0.950571	0.887905	1.04609	1.12691	0.922654	1.10144	0.987757	1.00776	1.00646	1.07427	23	0.995814	0.0702717	0.0170434
1.04095	1.02287	0.924023	1.03251	0.991407	0.902216	0.892781	0.941841	0.893901	1.03281	1.11642	0.924951	1.09213	0.985745	0.979948	1.0095	1.07118	24	0.99148	0.0677701	0.0164367
1.05617	1.02625	0.920849	1.03925	0.993538	0.89416	0.900471	0.951605	0.890955	1.05257	1.11663	0.931552	1.10297	0.978914	1.00182	1.00769	1.06722	25	0.996035	0.07006	0.0169921
1.05418	1.03244	0.915919	1.04696	1.00502	0.894305	0.908386	0.954281	0.9008	1.03741	1.13955	0.925755	1.09376	0.986786	0.997415	1.00686	1.07211	26	0.998349	0.0708524	0.0171842
1.06553	1.04148	0.921229	1.05671	1.00298	0.90222	0.905098	0.935797	0.894404	1.04028	1.13617	0.931552	1.11878	0.977507	1.0061	0.99837	1.06368	27	0.999877	0.0739027	0.017924
1.06556	1.04146	0.92462	1.0363	1.01344	0.916084	0.906437	0.947848	0.920405	1.05812	1.14167	0.923108	1.12479	0.993209	1.0026	1.00018	1.06189	28	1.00457	0.0713361	0.0173015
1.05469	1.03972	0.914402	1.0313	1.0229	0.897319	0.916053	0.971784	0.90296	1.05644	1.13854	0.930385	1.13016	0.989971	0.997152	0.99163	1.06586	29	1.00302	0.072652	0.0176207
1.06749	1.04075	0.912283	1.05386	1.0069	0.902751	0.90522	0.962179	0.919739	1.06532	1.13832	0.923694	1.13314	0.989116	1.01743	1.00378	1.07097	30	1.00664	0.0746922	0.0181155
1.07932	1.04285	0.911524	1.05354	1.01532	0.908547	0.907305	0.96921	0.93021	1.07079	1.12235	0.917878	1.13042	0.991834	1.01445	0.991982	1.0769	31	1.00791	0.0730665	0.0177212
1.07677	1.0411	0.920299	1.04305	1.02763	0.899997	0.911032	0.972361	0.918556	1.06741	1.12763	0.920872	1.15037	0.990757	1.00908	0.996499	1.07861	32	1.00894	0.0753705	0.01828
1.07351	1.03217	0.913018	1.05075	1.01689	0.907272	0.916985	0.977239	0.917519	1.06461	1.14246	0.910096	1.15715	0.993618	1.00593	1.00111	1.07467	33	1.00912	0.0771413	0.0187095
1.08342	1.03947	0.916251	1.04088	1.00864	0.916306	0.920568	0.993225	0.928233	1.06272	1.14208	0.926456	1.19315	0.991385	1.02084	0.995164	1.08714	34	1.01564	0.0791833	0.0192048
1.09001	1.03747	0.911931	1.04738	1.02413	0.915549	0.91364	0.988574	0.933635	1.06842	1.14229	0.931589	1.18681	0.986097	1.01158	0.99869	1.07676	35	1.01556	0.0788985	0.0191357
1.09507	1.03484	0.91953	1.05279	1.01093	0.919872	0.911706	0.995429	0.951173	1.07166	1.14509	0.924705	1.19983	1.00187	1.01454	0.997356	1.08027	36	1.01922	0.0798644	0.01937
1.0862	1.04938	0.921769	1.05411	1.02626	0.92404	0.927926	1.00274	0.93478	1.08531	1.13745	0.929814	1.21193	0.997426	1.00776	0.997986	1.08003	37	1.02205	0.0800922	0.0194252
1.09196	1.04862	0.915838	1.0479	1.01006	0.922788	0.914312	1.01274	0.947935	1.0957	1.13445	0.924468	1.24138	0.994153	1.01282	1.00583	1.08253	38	1.02373	0.0858002	0.0208096
1.10726	1.04022	0.915182	1.04876	1.02443	0.925778	0.922429	1.01342	0.9512	1.1005	1.14669	0.931459	1.23262	1.00768	1.01466	1.00775	1.08174	39	1.02775	0.0846202	0.0205234
													1.08174
