# Supplementary material for: A mechano-osmotic feedback couples cell volume to the rate of cell deformation
Source: eLife journal article supplement (doi:10.7554/elife.72381), 2022-04-13
Supplement: supp [file 20180724 DCs collagen.xlsx]

## Sheet: Sheet1
stage	lineage	speed	stdev	dV/dt	stdev	CV	0.579312													stage	lineage	speed	stdev	dV/dt	stdev		0.744364
8	1	0.24689	0.103967	-0.0365831	0.866376	0.0222445														8	1	0.24689	0.103967	-0.0365831	0.866376
8	2	2.52512	1.09096	0.247852	1.97291	0.0502759														8	2	2.52512	1.09096	0.247852	1.97291
8	3	1.20663	0.558272	-0.0948219	2.31013	0.0674268														8	3	1.20663	0.558272	-0.0948219	2.31013
8	4	1.4581	0.650313	0.0105618	1.56363	0.0435115														8	4	1.4581	0.650313	0.0105618	1.56363
8	5	0.116859	0.101512	0.115888	0.500815	0.0742146														8	5	0.116859	0.101512	0.115888	0.500815
8	6	0.0749614	0.0450773	0.0339596	0.441295	0.0251218														8	6	0.0749614	0.0450773	0.0339596	0.441295
8	7	0.886917	0.453966	0.124884	0.839985	0.0371759														8	7	0.886917	0.453966	0.124884	0.839985
8	8	0.975125	0.368574	-0.29224	1.0754	0.0362159														8	8	0.975125	0.368574	-0.29224	1.0754
8	9	0.186908	0.140934	0.107174	0.533663	0.0275077														8	9	0.186908	0.140934	0.107174	0.533663
8	10	0.144565	0.0708822	0.0528919	0.564569	0.0273934														8	10	0.144565	0.0708822	0.0528919	0.564569
8	11	1.06023	0.580514	0.0958072	0.627114	0.0298303														8	11	1.06023	0.580514	0.0958072	0.627114
8	12	2.34769	1.31259	0.0252367	1.97279	0.0728961														8	12	2.34769	1.31259	0.0252367	1.97279
8	13	0.336405	0.210853	-0.00664698	0.504768	0.0196826														8	13	0.336405	0.210853	-0.00664698	0.504768
8	14	0.558494	0.385254	-0.00778616	1.17231	0.0552749														8	14	0.558494	0.385254	-0.00778616	1.17231
8	15	1.17324	0.75756	-0.121462	1.81494	0.0656855														8	15	1.17324	0.75756	-0.121462	1.81494
8	16	1.07487	0.612406	0.236378	0.575173	0.0436471														8	16	1.07487	0.612406	0.236378	0.575173
8	17	1.06074	0.626188	0.236979	0.916029	0.0374436														8	17	1.06074	0.626188	0.236979	0.916029
8	18	1.52876	0.928511	-0.105547	1.37697	0.0446251														8	18	1.52876	0.928511	-0.105547	1.37697
8	19	0.360274	0.190462	0.153276	0.531282	0.0210288														8	19	0.360274	0.190462	0.153276	0.531282
8	20	0.258394	0.122197	-0.0780647	0.676861	0.0231708														8	20	0.258394	0.122197	-0.0780647	0.676861
8	21	0.605427	0.402103	0.219407	0.612045	0.057092														8	21	0.605427	0.402103	0.219407	0.612045
8	22	1.75413	0.8093	0.00506319	1.26785	0.0570778														8	22	1.75413	0.8093	0.00506319	1.26785
8	23	1.5539	0.626776	0.459697	3.30108	0.125645														8	23	1.5539	0.626776	0.459697
8	24	0.34809	0.200963	0.156595	0.671355	0.0419257														8	24	0.34809	0.200963	0.156595	0.671355
7	1	0.55811	0.446743	0.0418367	0.801385	0.0258534														7	1	0.55811	0.446743	0.0418367	0.801385
7	3	1.03019	0.399391	-0.0746674	1.60009	0.0570252														7	3	1.03019	0.399391	-0.0746674	1.60009
7	4	1.51646	0.684945	-0.00454815	1.52661	0.0771814														7	4	1.51646	0.684945	-0.00454815	1.52661
7	5	0.542298	0.311782	-0.0125746	0.926985	0.0370395														7	5	0.542298	0.311782	-0.0125746	0.926985
7	6	0.885104	0.392689	0.0604361	0.701449	0.0320991														7	6	0.885104	0.392689	0.0604361	0.701449
7	7	1.96657	0.530156	0.021702	1.18386	0.0507856														7	7	1.96657	0.530156	0.021702	1.18386
7	8	1.01528	0.598466	0.163143	0.725602	0.0250066														7	8	1.01528	0.598466	0.163143	0.725602
7	9	0.783721	0.512411	-0.305193	1.30969	0.0433514														7	9	0.783721	0.512411	-0.305193	1.30969
7	10	0.319613	0.151678	-0.0652313	0.994786	0.0421534														7	10	0.319613	0.151678	-0.0652313	0.994786
7	12	0.0940254	0.0307167	0.0821227	0.66605	0.0282711														7	12	0.0940254	0.0307167	0.0821227	0.66605
7	13	0.101791	0.0490698	0.0557768	0.571501	0.0190984														7	13	0.101791	0.0490698	0.0557768	0.571501
7	15	0.0607781	0.0339031	0.0538444	0.421996	0.015706														7	15	0.0607781	0.0339031	0.0538444	0.421996
7	16	1.10877	0.545902	0.0140967	1.40157	0.0419184														7	16	1.10877	0.545902	0.0140967	1.40157
7	17	0.887769	0.530382	0.215374	0.545952	0.0270885														7	17	0.887769	0.530382	0.215374	0.545952
7	18	0.636322	0.32544	-0.00376881	0.919927	0.039203														7	18	0.636322	0.32544	-0.00376881	0.919927
7	19	0.075536	0.0502564	0.0312609	0.512278	0.0254058														7	19	0.075536	0.0502564	0.0312609	0.512278
7	20	1.94419	0.848006	-0.0794935	1.19224	0.0400804														7	20	1.94419	0.848006	-0.0794935	1.19224
7	21	2.96208	0.794798	0.160319	0.787099	0.0477125														7	21		0.794798	0.160319	0.787099
7	22	3.18576	1.12526	0.0961643	1.55622	0.0358397														7	22		1.12526	0.0961643	1.55622

## Sheet: for 5 intervals
	speed (µm/min)	dV/dt (µm3/min)
8	4.70344	1.02297
8	4.47283	-2.87811
8	4.31173	-0.257955
8	4.11799	5.48926
8	3.91495	-0.431223
8	3.76693	0.997009
8	3.70461	0.730095
8	3.69091	2.3888
8	3.4763	0.749953
8	3.45805	-2.5355
8	3.35651	2.78548
8	3.30387	0.742667
8	3.20776	-3.65648
8	3.1648	3.17802
8	3.13302	0.644668
8	3.08197	0.137959
8	3.043	0.0598531
8	3.02126	-1.47681
8	2.93858	-0.582669
8	2.92871	2.19153
8	2.90282	-0.695365
8	2.88936	-1.1777
8	2.8424	0.0848495
8	2.75359	-3.00474
8	2.73602	4.58626
8	2.65816	-0.493748
8	2.57302	0.785631
8	2.55559	-0.789004
8	2.54769	-1.18367
8	2.53357	-3.46691
8	2.53164	-2.42661
8	2.47881	1.39236
8	2.45865	-0.461044
8	2.40806	2.83169
8	2.37351	5.00704
8	2.3677	-1.44941
8	2.28011	0.600527
8	2.24784	0.256474
8	2.23041	0.0186535
8	2.19982	0.425629
8	2.16007	-0.0879222
8	2.15768	0.00722729
8	2.15173	-1.38282
8	2.10154	0.959232
8	2.08479	-6.89257
8	2.07902	0.195108
8	2.07858	0.509708
8	2.07801	1.63201
8	2.06659	-0.435122
8	2.05289	1.21514
8	2.04949	-0.252712
8	2.04037	1.06942
8	2.04017	0.126424
8	1.9733	2.04629
8	1.97004	-0.152858
8	1.96761	-0.520565
8	1.96006	0.776921
8	1.95638	2.8766
8	1.94141	-0.753781
8	1.92881	0.666184
8	1.92182	4.14621
8	1.89727	-1.60198
8	1.89088	0.116619
8	1.88437	-1.25278
8	1.85758	-1.74249
8	1.85656	-0.0068508
8	1.84253	0.58513
8	1.81268	-1.11798
8	1.80795	0.529096
8	1.7819	0.792762
8	1.73802	-3.61071
8	1.73671	6.8631
8	1.71979	-0.317948
8	1.7081	1.14189
8	1.69986	-0.0820981
8	1.69834	1.71378
8	1.69794	-0.222059
8	1.68706	0.635855
8	1.68641	0.876927
8	1.66602	0.829416
8	1.65199	-0.773055
8	1.63588	-1.11134
8	1.63501	0.155556
8	1.59874	0.817352
8	1.59747	-2.88495
8	1.58821	-0.837836
8	1.5872	-2.66367
8	1.58184	6.00823
8	1.56998	0.618634
8	1.52572	1.55074
8	1.49411	-3.44867
8	1.49377	0.498334
8	1.48987	0.00896895
8	1.48366	-1.34128
8	1.48211	2.47903
8	1.47383	-0.404734
8	1.46959	0.0807469
8	1.46847	-1.31448
8	1.45711	2.14265
8	1.42574	0.348199
8	1.417	0.208236
8	1.40106	-0.979053
8	1.39985	0.565798
8	1.39096	0.60443
8	1.37994	0.565484
8	1.37987	-0.258644
8	1.36181	-0.737313
8	1.36043	-0.0675451
8	1.35802	-0.180263
8	1.35453	-0.0601709
8	1.33879	-0.353425
8	1.33862	3.51512
8	1.32672	-0.756314
8	1.31264	-0.609123
8	1.2784	0.760641
8	1.2729	-0.476397
8	1.2513	2.7346
8	1.25049	-1.14122
8	1.24646	1.28526
8	1.23457	0.495165
8	1.22996	-3.98321
8	1.22012	0.518049
8	1.2199	-0.0182733
8	1.21542	-0.652645
8	1.20689	-0.0472233
8	1.20196	0.605457
8	1.17707	0.577912
8	1.17563	-0.0760338
8	1.16064	-3.61987
8	1.14319	-0.86498
8	1.13277	-5.54495
8	1.12232	0.987761
8	1.12143	-0.28446
8	1.11548	0.096835
8	1.10953	1.23009
8	1.10031	-1.24628
8	1.09022	-0.748792
8	1.06602	2.19168
8	1.05827	-0.879254
8	1.05698	-1.80078
8	1.04835	-0.400327
8	1.03957	0.431785
8	1.03916	1.91319
8	1.03734	-2.61349
8	1.03049	-1.2789
8	1.02775	0.679299
8	1.02538	-0.534733
8	1.02063	0.489901
8	1.01551	0.254682
8	1.01208	0.0311125
8	1.00293	0.264293
8	0.999068	-0.636518
8	0.97701	-1.23237
8	0.973738	1.58794
8	0.964601	1.20556
8	0.955457	1.0326
8	0.953562	-0.444755
8	0.946075	-0.473839
8	0.931087	0.0664676
8	0.916473	-0.291585
8	0.914178	0.634754
8	0.887914	0.0623274
8	0.880903	1.78301
8	0.872898	-1.29969
8	0.863796	1.81589
8	0.85179	-0.824477
8	0.850887	0.695569
8	0.84113	0.512605
8	0.84044	-0.556209
8	0.833312	-0.340751
8	0.823761	0.87624
8	0.804994	0.16367
8	0.798601	0.583063
8	0.790468	0.314577
8	0.77877	1.26071
8	0.775127	0.561673
8	0.774863	2.34439
8	0.771447	-0.278867
8	0.767997	0.63561
8	0.766485	1.55567
8	0.743345	0.9153
8	0.742873	0.0164996
8	0.735203	1.68764
8	0.734083	-1.1989
8	0.724214	0.770976
8	0.712508	-0.603183
8	0.712223	-1.00049
8	0.708903	-0.6756
8	0.705737	-1.97332
8	0.702366	-0.315485
8	0.695341	-0.109159
8	0.694227	-0.0426558
8	0.693315	0.19041
8	0.681066	1.48714
8	0.672024	0.679255
8	0.670673	0.199729
8	0.669616	-0.0511754
8	0.666806	-0.382474
8	0.65628	-1.32918
8	0.648693	0.273901
8	0.646236	-1.2022
8	0.644168	-0.951844
8	0.636348	0.520521
8	0.631107	-0.0253331
8	0.622178	-0.311992
8	0.604896	0.288995
8	0.601776	0.0817473
8	0.58926	-2.53093
8	0.576823	-0.0105329
8	0.568566	0.524922
8	0.566171	-0.0136356
8	0.562049	-1.09752
8	0.556812	0.4233
8	0.553117	0.114209
8	0.537163	-0.000549339
8	0.530526	-0.024759
8	0.519566	0.746856
8	0.519325	-0.965782
8	0.51881	-0.270411
8	0.515651	-0.990064
8	0.513472	-0.904903
8	0.512157	-0.232835
8	0.51093	-0.203537
8	0.507456	0.244437
8	0.502646	-0.140216
8	0.491539	0.126936
8	0.490769	-0.610727
8	0.487293	0.70336
8	0.478703	-0.370718
8	0.476702	-1.38322
8	0.474196	5.72538
8	0.472204	0.0184912
8	0.468217	0.272145
8	0.460546	-0.486443
8	0.450819	-0.0902767
8	0.450629	0.106046
8	0.443883	-0.996518
8	0.443133	-0.306238
8	0.44157	0.276023
8	0.437378	-0.0904563
8	0.436052	0.0383679
8	0.431408	-0.232792
8	0.414846	-1.88232
8	0.414388	-0.165919
8	0.412598	-1.24297
8	0.408209	-1.01223
8	0.405712	-0.220067
8	0.398789	0.0684332
8	0.394992	-1.03459
8	0.394589	-0.702697
8	0.37758	0.209405
8	0.375271	1.48483
8	0.360245	-0.336148
8	0.359196	1.21708
8	0.357989	0.22463
8	0.356501	1.10106
8	0.351194	-0.186617
8	0.350336	-0.0725375
8	0.348846	0.779282
8	0.347784	-1.09203
8	0.347312	0.670552
8	0.338289	-0.605085
8	0.336791	-1.41816
8	0.334494	0.0850768
8	0.318703	0.351579
8	0.314993	-0.89697
8	0.313033	-0.326542
8	0.310876	0.585194
8	0.307852	0.27679
8	0.307264	0.275918
8	0.300381	0.319811
8	0.297985	1.0766
8	0.294914	-0.190008
8	0.290339	-0.524108
8	0.289004	1.42731
8	0.28394	-0.766231
8	0.28348	-0.366373
8	0.281817	0.910829
8	0.279531	0.425063
8	0.273459	0.23321
8	0.272826	0.090402
8	0.271834	0.489833
8	0.270231	0.336094
8	0.26671	-0.0718327
8	0.263744	0.803568
8	0.263351	0.137501
8	0.261836	0.329662
8	0.259579	0.353524
8	0.257102	0.464841
8	0.256678	0.328822
8	0.255508	-0.151501
8	0.253033	-1.30633
8	0.249021	0.407066
8	0.246658	0.518519
8	0.243752	-0.121295
8	0.233685	0.510206
8	0.22624	0.161896
8	0.22116	0.985288
8	0.218395	0.0254643
8	0.216452	0.195296
8	0.215717	-0.299668
8	0.214859	-0.282435
8	0.204908	0.480762
8	0.203511	-0.652976
8	0.202251	-0.545141
8	0.199782	-0.554468
8	0.199739	0.622694
8	0.199518	-1.39401
8	0.199003	0.0344916
8	0.198872	0.283431
8	0.193481	0.543488
8	0.188527	-0.212663
8	0.185277	0.265969
8	0.183454	0.0681184
8	0.182773	0.87333
8	0.181953	0.292548
8	0.180321	-0.134532
8	0.177946	-0.901684
8	0.177105	0.522186
8	0.17688	-0.015183
8	0.175981	0.633418
8	0.17439	-0.0124972
8	0.17427	-0.0769971
8	0.166404	0.0148805
8	0.166286	0.603513
8	0.166153	-1.07935
8	0.166047	0.0997402
8	0.162651	-0.0893768
8	0.156536	-0.0767392
8	0.156076	-0.799687
8	0.150541	-2.27662
8	0.147954	0.682931
8	0.147241	0.0922173
8	0.146859	-0.345611
8	0.143315	0.149029
8	0.141707	0.628458
8	0.139841	-0.257932
8	0.139797	0.107651
8	0.135056	0.977473
8	0.13414	-2.72878
8	0.131566	-0.567329
8	0.130614	0.220971
8	0.128854	0.301946
8	0.127955	0.251588
8	0.126996	-0.313228
8	0.125816	0.577501
8	0.125728	0.43994
8	0.123299	0.810436
8	0.123117	0.509236
8	0.121833	0.491875
8	0.119139	0.884154
8	0.116047	1.02638
8	0.115911	0.100173
8	0.115329	0.0795767
8	0.114998	0.519634
8	0.114069	0.996749
8	0.114062	-0.328838
8	0.113687	-0.528688
8	0.109206	0.00329387
8	0.109064	1.2224
8	0.105156	0.218919
8	0.102975	-0.0712209
8	0.102544	-0.970366
8	0.101137	0.933094
8	0.0989527	-0.696485
8	0.0933968	0.408338
8	0.0924902	-1.11803
8	0.0923863	-0.0677911
8	0.0914309	0.116766
8	0.0908908	-0.637918
8	0.0871657	0.627647
8	0.0850361	-0.582726
8	0.0841454	-0.626715
8	0.0836422	-0.0975914
8	0.0831809	0.381634
8	0.081287	0.735852
8	0.0800512	0.396369
8	0.0799544	0.0328112
8	0.0795096	-0.317372
8	0.0782727	0.414269
8	0.0735819	0.147838
8	0.0731698	0.186799
8	0.0713215	0.225007
8	0.0668514	0.935103
8	0.0657696	0.804368
8	0.0649054	0.435376
8	0.0644748	0.272161
8	0.0592022	0.719734
8	0.0583849	0.46691
8	0.0555358	0.451833
8	0.0544252	-0.87109
8	0.0500814	0.720561
8	0.0474656	0.423475
8	0.0407755	-0.398807
8	0.0407355	-0.0491758
8	0.0402092	0.48968
8	0.0361767	-0.615024
8	0.0361387	-0.107694
8	0.0358825	-0.103808
8	0.0339009	0.00653562
8	0.0330401	-1.21657
8	0.0323821	-0.0374289
8	0.0321397	0.305741
8	0.0307554	0.14329
8	0.0304217	0.389119
8	0.0290288	-0.211138
8	0.0255075	0.172121
8	0.0229824	-0.221043
8	0.0212992	0.144483
8	0.0193239	-0.248424
8	0.0165599	0.0128234
8	0.01473	0.606595
8	0.00690271	-0.620805
7	4.63757	-2.50025
7	3.83161	0.37105
7	3.7563	0.60899
7	3.6118	1.2124
7	3.57977	2.01739
7	3.55828	-0.116005
7	3.20456	-1.42069
7	2.93356	-0.246887
7	2.85054	-0.111226
7	2.83612	-0.841616
7	2.76376	0.637351
7	2.76225	0.651174
7	2.73765	-1.1243
7	2.73639	2.25415
7	2.71681	0.337196
7	2.70274	-1.46042
7	2.68208	-1.78123
7	2.6571	-1.16549
7	2.64227	0.196898
7	2.62204	0.630523
7	2.50705	-0.515982
7	2.44872	-0.887555
7	2.43965	-0.0369907
7	2.39975	1.94649
7	2.38022	0.133718
7	2.37698	0.263175
7	2.34975	-1.08839
7	2.30313	-1.46332
7	2.28121	0.738126
7	2.26501	1.0491
7	2.25042	0.751942
7	2.17353	0.0922443
7	2.17334	-1.45375
7	2.16966	-1.93834
7	2.16951	1.29948
7	2.13252	0.176732
7	2.08672	-0.718002
7	2.04177	0.90132
7	1.98062	2.34091
7	1.93245	0.0769299
7	1.91871	0.163149
7	1.81987	1.43593
7	1.81569	-2.17167
7	1.80633	-0.869269
7	1.76571	2.95181
7	1.7091	2.10368
7	1.67851	2.12966
7	1.67343	0.859238
7	1.67079	0.384116
7	1.62834	1.57476
7	1.61613	1.735
7	1.59558	-0.418628
7	1.58803	0.396822
7	1.58799	-3.19245
7	1.58169	0.570518
7	1.57549	-0.274677
7	1.56827	-0.0748769
7	1.52304	1.23999
7	1.47822	-2.30018
7	1.45544	-1.81243
7	1.45237	3.10028
7	1.43936	-0.588107
7	1.43346	1.40968
7	1.42812	-0.804358
7	1.41681	1.6122
7	1.41658	-0.184969
7	1.36234	-1.22479
7	1.33975	0.116493
7	1.33665	-4.77805
7	1.32539	0.59369
7	1.31088	-1.25956
7	1.30789	1.31856
7	1.30251	0.129112
7	1.28865	1.00323
7	1.28175	-1.60003
7	1.27929	-0.930949
7	1.26401	0.0151176
7	1.25928	-0.261743
7	1.25235	0.72082
7	1.23934	1.26447
7	1.21963	1.32657
7	1.21125	-0.421452
7	1.2012	-1.10533
7	1.184	2.22363
7	1.17516	2.74633
7	1.16879	1.35543
7	1.16042	1.60328
7	1.15353	-0.221784
7	1.15093	1.87418
7	1.14689	-0.131204
7	1.1421	0.106375
7	1.13818	0.067203
7	1.13598	-0.833249
7	1.13016	-1.39345
7	1.12263	-2.1624
7	1.11014	-0.879445
7	1.10135	0.422858
7	1.09833	0.224679
7	1.08329	0.202696
7	1.06802	0.318225
7	1.05864	-0.244228
7	1.04579	0.821192
7	1.04443	-2.12388
7	1.02833	0.453152
7	1.02822	-0.285118
7	1.00286	1.24442
7	0.99668	-1.62976
7	0.994025	1.2306
7	0.985956	0.504016
7	0.975702	-1.53509
7	0.951127	0.515459
7	0.946865	-0.249777
7	0.937803	-0.57253
7	0.933628	0.323619
7	0.924173	-0.0889195
7	0.924006	-1.46894
7	0.900934	-0.0733556
7	0.898669	0.450668
7	0.890133	-1.23875
7	0.883079	0.984854
7	0.881451	-0.00610657
7	0.870347	1.34631
7	0.869499	-0.595497
7	0.868929	-0.251175
7	0.836851	-0.183103
7	0.834752	-0.146281
7	0.834048	0.407042
7	0.826844	-0.961208
7	0.823573	-0.58708
7	0.820626	-0.944598
7	0.814303	0.0276807
7	0.813235	-0.0348321
7	0.809021	-0.454187
7	0.806415	-0.730775
7	0.805642	-0.115785
7	0.804915	-0.418423
7	0.802406	-1.61689
7	0.78196	-0.215276
7	0.779997	0.082445
7	0.775611	-1.33717
7	0.772989	0.753123
7	0.746525	0.251112
7	0.729147	-0.346264
7	0.724413	0.2667
7	0.71226	1.3918
7	0.711068	0.919769
7	0.698024	0.735133
7	0.684455	-0.704894
7	0.678562	-1.5199
7	0.672135	2.07637
7	0.658158	-0.136136
7	0.644545	-0.0363028
7	0.626495	-0.309067
7	0.621369	0.743691
7	0.584612	1.70088
7	0.550253	0.427699
7	0.542032	0.135299
7	0.540912	0.36239
7	0.530369	1.13555
7	0.527551	-1.48124
7	0.524639	-1.48183
7	0.508918	0.0310435
7	0.503692	-1.61756
7	0.500879	1.03854
7	0.489181	0.903038
7	0.488152	-0.324846
7	0.483963	1.4942
7	0.475563	0.29936
7	0.473703	0.398384
7	0.467545	-0.4919
7	0.465571	0.685571
7	0.46463	-0.239205
7	0.452217	0.378938
7	0.430666	0.217886
7	0.414858	0.329863
7	0.404569	-0.76159
7	0.403175	-0.447769
7	0.398742	-0.0716586
7	0.398228	-0.00635651
7	0.395938	0.0634716
7	0.392957	-0.0723894
7	0.384344	0.184651
7	0.384212	1.5
7	0.383641	0.012143
7	0.381953	0.20978
7	0.375928	-0.942595
7	0.368563	-1.99186
7	0.366235	0.129657
7	0.365474	1.06091
7	0.356798	-1.24824
7	0.353182	0.94238
7	0.341262	-0.819848
7	0.341062	-0.401616
7	0.338877	-0.0207741
7	0.327329	0.782618
7	0.322592	-0.706468
7	0.308442	-0.20741
7	0.307183	1.24108
7	0.304749	0.736106
7	0.303033	0.837911
7	0.296549	-1.85375
7	0.292794	-0.705293
7	0.288839	0.00260938
7	0.286825	0.0814489
7	0.285965	-0.0166253
7	0.283676	-1.03519
7	0.280484	0.169788
7	0.273468	1.04471
7	0.256994	1.59733
7	0.251655	-0.174682
7	0.250039	-0.556319
7	0.249525	-1.78855
7	0.246837	0.663806
7	0.245722	1.31534
7	0.198436	0.972552
7	0.197929	0.652028
7	0.194112	-0.576219
7	0.193009	1.37687
7	0.191843	-0.363122
7	0.191028	-0.300907
7	0.186578	0.504436
7	0.165689	0.295612
7	0.162678	-0.180663
7	0.149897	-3.61381
7	0.148143	0.998511
7	0.147011	0.768348
7	0.146436	-0.457871
7	0.14135	-0.212927
7	0.131307	-0.220378
7	0.128317	1.41893
7	0.127314	-0.624391
7	0.126566	0.377407
7	0.126098	1.39191
7	0.125236	1.00396
7	0.121463	0.572694
7	0.121262	-0.267265
7	0.120219	-0.37301
7	0.120193	-0.412587
7	0.12	-0.057947
7	0.118547	0.999561
7	0.117254	-0.600608
7	0.114991	-1.07094
7	0.114854	-0.363165
7	0.111275	-0.113286
7	0.108333	-0.632664
7	0.107627	0.525205
7	0.106131	-0.116995
7	0.105516	-0.355916
7	0.105396	-0.0801685
7	0.10352	-0.708201
7	0.102576	-0.212359
7	0.101648	0.0413798
7	0.101396	0.56139
7	0.10113	-0.579417
7	0.0980815	0.0840272
7	0.092778	-0.703278
7	0.0918569	-1.14955
7	0.0882107	-0.272587
7	0.0867249	-0.217639
7	0.0849945	-0.421953
7	0.0843994	-0.589724
7	0.0818663	0.103164
7	0.0807675	-0.484564
7	0.0794363	0.971315
7	0.0789961	-0.0287127
7	0.0777595	-0.96109
7	0.07724	0.205433
7	0.0769414	1.13849
7	0.0768109	0.52906
7	0.0743074	0.93038
7	0.0735608	0.452118
7	0.0713887	0.00974082
7	0.0710649	-0.287019
7	0.070004	0.366771
7	0.0683283	0.738664
7	0.0677524	-0.0501049
7	0.0626702	0.446161
7	0.0603847	0.340585
7	0.0547385	-0.332858
7	0.0527137	-0.217076
7	0.0518896	0.716551
7	0.0500947	0.154008
7	0.0463597	-0.243988
7	0.0461512	0.00026842
7	0.0456212	-0.00555344
7	0.0420256	-0.140049
7	0.0383916	-0.0850755
7	0.0364605	-0.110104
7	0.0355714	-0.267126
7	0.0349619	-0.67159
7	0.0334317	0.142169
7	0.0329724	0.255116
7	0.0305546	-0.0304908
7	0.0295281	0.101352
7	0.0247048	0.610641
7	0.0230519	-0.210638
7	0.0224719	-0.403518
7	0.0224194	-0.261366
7	0.0223867	0.45042
7	0.0214995	-0.660308
7	0.021065	1.16375
7	0.0153353	0.141007
7	0.0151445	0.143841
7	0.0112631	-0.36799
7	0.00372149	0.242048
