# Supplementary material for: A mechano-osmotic feedback couples cell volume to the rate of cell deformation
Source: eLife journal article supplement (doi:10.7554/elife.72381), 2022-04-13
Supplement: supp [file 20200806 hela embl PLL-PEG.xlsx]

## Sheet: Sheet1
2358.54	1737.79	1947.63	2186.71	1889.94	2216.56	2665.29	2583.22	2320.8	1937.48	1674.25	2021.79	1994.21	1922.54	2938.31	2346.44	2130.17	3116.31	1851.95	1917.46	2288.02	2203.07	2769.19	1852.45	1591.27	1800.09	1924.55	1995.05	2029.3	2032.4	1633.6	2437.84	1662.46	2369.52	1575.43	1638.42	3316.84	3008.97	1844.15	2534.93	2784.92	2237.89	1704.44	2297.53	2729.58	1754.39	1503.99	1891.42	2595.83	2100.72
1	1	1	1	1	1	1	1	1	1	1	2	2	2	2	2	2	2	2	2	2	2	2	2	2	2	2	2	2	2	3	3	3	3	3	3	3	3	3	3	3	3	3	3	3	3	3	4	4	4
1	2	3	4	5	6	7	8	9	10	11	1	2	3	5	6	7	8	9	10	11	12	13	14	15	16	17	18	19	20	1	2	3	4	5	6	7	9	10	11	12	13	14	15	16	17	18	1	2	3
100	100	100	100	100	100	100	100	100	100	100	100	100	100	100	100	100	100	100	100	100	100	100	100	100	100	100	100	100	100	100	100	100	100	100	100	100	100	100	100	100	100	100	100	100	100	100	100	100	100
100.264	102.638	101.523	101.793	100.016	101.973	98.712	99.3653	100.025	100.236	100.904	99.9256	98.7401	103.171	99.293	99.3139	101.746	101.512	99.8543	99.3025	99.9691	98.1797	100.632	99.6675	98.5253	100.746	100.378	98.2646	99.5925	100.252	100.001	99.3607	99.8138	98.4453	99.6422	99.0044	98.8923	99.7938	101.01	100.665	99.7336	100.992	100.936	99.289	99.6337	100.047	99.6166	99.1517	99.7215	100.85
99.8906	100.475	101.97	101.909	99.2	100.336	98.0301	99.6738	98.2511	100.945	101.829	99.0125	99.1376	100.58	99.0066	97.4079	101.08	101.256	98.3335	99.3669	99.0615	99.2392	100.253	99.167	98.1908	101.746	100.518	99.5201	99.7602	100.428	100.088	97.8147	100.54	100.204	100.159	100.706	98.6431	100.149	99.0461	101.552	98.5739	101.175	98.9788	96.3308	99.5836	102.573	98.9297	100.458	98.6766	99.5156
99.8043	103.271	100.506	101.658	101.376	99.1081	97.8619	99.8878	98.778	100.91	101.097	100.238	99.1423	101.042	98.8	97.4065	102.566	101.675	97.8992	99.8412	99.225	99.8875	99.8586	99.2706	100.227	102.212	100.415	98.9279	100.443	100.516	101.583	98.3316	100.52	98.9416	99.4977	99.7166	98.2976	99.6002	100.525	102.487	99.9891	100.564	99.9726	97.2708	100.317	103.241	99.0529	99.7761	99.2033	100.613
101.363	103.738	101.895	102.137	101.152	99.9992	97.9069	97.6602	99.9603	99.9713	100.885	101.408	98.8575	100.663	98.5265	95.8539	104.591	102.468	97.4801	99.365	100.791	99.0218	99.764	100.508	97.5407	102.235	101.669	99.6117	99.1245	102.097	101.362	97.6461	102.532	99.121	102.5	100.67	98.1707	100.416	101.975	102.476	99.4556	99.4326	98.4876	96.3903	98.5334	102.328	100.127	100.907	99.6494	98.8805
100.462	104.441	102.237	100.915	101.53	101.334	97.9392	99.1424	100.996	101.059	99.6561	100.992	98.7593	100.342	99.993	95.2724	102.151	102.093	96.7128	100.214	100.134	100.748	99.961	101.227	100.22	103.583	102.616	99.3561	100.405	102.431	101.209	97.0798	102.877	98.6156	103.009	101.733	97.0931	100.688	102.926	105.641	99.0527	100.859	101.348	95.8752	100.054	104.381	100.405	99.4704	100.01	100.299
100.498	102.051	104.207	101.163	102.539	98.8134	97.2762	100.68	101.755	100.592	101.536	102.709	100.496	100.147	99.7893	95.7923	103.636	103.221	95.2562	99.3286	99.461	100.067	99.5946	101.156	101.979	103.939	102.435	99.1405	100.893	102.311	100.606	96.804	101.096	99.494	104.177	102.138	97.726	100.1	103.556	103.556	99.5033	100.108	100.446	96.5629	98.1996	104.64	97.9773	99.6358	100.927	100.133
99.5072	103.71	102.433	103.189	105.051	99.5623	98.2593	100.65	100.288	100.926	100.83	103.556	100.833	99.4846	98.3899	95.538	104.549	101.68	97.0952	101.052	99.3962	100.085	99.984	100.016	101.169	104.086	102.146	98.5512	101.07	104.11	101.811	96.1613	102.785	98.8905	106.375	101.634	97.4207	98.2306	103.767	103.127	99.8234	100.036	96.9062	97.2982	98.6747	105.591	99.6886	99.3181	100.506	99.6331
101.155	104.004	102.892	101.759	104.87	98.649	97.8032	100.421	101.95	98.5427	99.6655	103.492	100.603	100.404	98.4764	94.9867	103.158	100.955	96.5304	99.4902	99.6658	99.5946	97.9915	102.491	102.155	106.619	101.895	99.0891	100.634	102.52	103.313	97.6009	103.415	99.5207	105.595	101.262	97.7014	97.4383	102.796	103.761	99.6992	100.728	99.5482	97.0363	98.1889	106.087	100.161	100.106	99.2427	99.0246
99.5192	103.869	103.289	102.232	105.292	99.0913	98.6362	100.896	102.588	99.1811	101.139	104.18	102.712	98.9148	99.2947	94.8125	103.849	101.688	96.8191	99.6136	98.8494	100.186	100.019	101.997	103.21	106.24	101.976	99.6642	101.085	101.582	103.06	95.5962	103.733	98.5255	105.496	103.712	97.8437	97.9747	104.3	104.889	99.5343	100.416	96.5475	98.0362	99.3474	103.688	100.497	100.438	99.7144	99.6561
102.741	103.055	101.157	103.473	104.475	100.361	98.6032	101.606	99.282	100.72	99.4162	104.749	101.659	98.2829	98.5064	95.4257	103.773	101.302	97.2293	98.4648	99.2358	99.0221	99.8166	102.47	104.237	105.637	101.28	98.7093	101.303	103.858	100.591	94.7141	103.427	98.1497	105.591	104.496	96.993	98.1671	103.571	104.412	99.0945	101.466	98.3009	96.6742	98.3139	103.871	99.6919	101.672	99.9182	98.0659
101.219	104.173	104.27	103.351	105.345	98.8445	97.8772	102.603	101.817	99.4899	102.359	104.417	101.623	96.7697	97.7902	94.8618	104.619	101.714	95.4475	99.2866	98.3361	98.1258	98.7707	104.521	103.423	107.088	102.229	100.265	101.339	103.862	101.458	96.131	103.391	97.9102	103.951	106.012	97.3973	97.7027	103.158	103.836	97.6413	101.177	97.8159	97.2494	98.6932	108.091	100.666	100.672	100.121	98.2028
100.6	103.306	104.764	103.309	104.645	97.9968	96.9169	105.047	102.29	99.9599	101.208	105.393	100.862	100.275	99.5243	95.8244	102.9	102.291	94.9405	99.202	97.5887	98.607	97.3318	102.135	103.847	105.917	100.803	98.8002	102.76	103.136	103.07	96.5013	103	96.9577	108.345	105.596	98.7596	97.6136	101.843	103.785	99.0872	100.962	98.3358	98.9528	98.1504	105.796	100.449	101.533	98.2745	98.755
101.354	105.479	103.921	102.062	106.583	99.1573	96.3245	104.106	103.634	99.0417	101.268	106.818	103.847	97.0837	99.3339	96.2371	103.5	101.481	93.6451	101.02	98.3016	98.1722	98.0102	104.532	104.76	104.346	102.688	99.2722	101.846	104.919	101.186	94.2742	104.485	97.439	108.555	105.917	97.7681	97.5253	100.481	104.387	98.0909	101.533	98.1747	97.6853	98.0571	103.941	99.8984	99.9764	98.7941	97.1436
101.136	104.52	104.021	102.411	106.619	101.363	96.717	102.98	101.552	100.132	101.894	106.065	101.347	98.6959	97.8514	95.8772	104.025	102.157	95.7995	101.013	99.2297	99.4557	96.9967	102.506	105.1	101.691	102.058	98.249	104.416	103.843	102.729	94.3383	104.339	97.8473	106.943	104.748	97.8229	96.9923	100.575	103.161	98.6599	102.355	96.1019	100.343	97.9504	106.566	100.106	100.01	98.6883	96.4983
100.23	105.571	104.025	103.821	105.925	100.111	97.59	102.866	102.007	99.3083	99.2657	107.689	101.212	100.183	98.3105	95.4981	102.65	101.041	97.3342	99.4053	97.6989	98.1491	97.4641	100.865	104.532	102.081	102.125	99.2369	105.635	104.514	103.561	95.3093	104.796	96.8871	101.036	103.218	97.6904	95.7888	100.153	103.893	99.7334	102.868	98.9023	99.5001	97.4003	105.041	98.8351	100.356	98.5159	98.1135
100.894	106.633	102.861	102.755	105.92	98.2965	97.9784	101.024	103.321	100.572	101.1	106.231	99.2363	98.0336	97.6321	96.2809	105.123	101.275	94.9772	101.828	98.2984	99.2083	97.0777	103.937	104.209	102.07	101.861	100.179	103.97	102.7	102.895	93.9606	103.808	97.2045	101.537	105.793	96.8986	97.2844	101.696	104.56	99.1602	101.337	97.5094	98.8671	97.3355	104.897	101.018	99.8126	100.37	97.5815
101.545	105.932	104.784	103.459	104.77	99.6902	97.0999	99.3352	104.754	100.135	100.477	108.916	100.225	98.8442	97.8804	96.0714	103.892	103.378	96.2635	99.0146	97.3056	99.0501	97.1132	103.172	105.61	101.44	101.743	99.3431	104.829	102.263	102.319	94.4142	103.689	96.4059	100.245	106.694	97.468	96.7907	101.265	105.97	98.9945	100.293	97.0049	97.1798	95.9071	105.912	102.027	100.566	99.4901	97.169
101.857	106.865	105.889	105.353	103.936	100.951	97.1401	98.8777	101.677	99.8672	100.762	108.43	99.1703	98.5467	98.0373	96.137	105.834	101.909	94.4881	100.814	98.3244	99.382	96.7242	104.333	101.798	99.8045	103.187	100.544	105.878	104.828	102.378	96.0568	102.432	96.2193	102.295	107.771	96.4758	96.5122	100.789	104.752	100.339	100.426	98.1547	94.9564	97.2718	106.113	100.626	100.611	99.3811	95.9568
101.798	105.005	105.313	103.469	104.208	97.7243	97.6948	97.9955	102.72	99.3591	102.011	108.421	99.0915	100.564	97.4608	96.2966	105.851	102.683	95.0842	99.8671	97.7354	98.951	97.3746	104.772	104.951	101.222	100.858	99.3736	106.193	103.189	103.185	95.588	103.624	95.8326	102.373	106.071	96.3699	96.0525	101.972	104.492	98.0824	100.523	96.4773	95.561	97.5771	108.099	99.724	99.3685	99.3511	98.0699
101.564	106.224	105.561	104.569	101.698	98.1558	96.7653	98.0599	105.203	99.124	101.691	110.17	100.338	98.8702	96.8656	97.0979	106.803	104.451	96.3786	99.3901	97.7459	99.7666	96.919	105.165	104.622	99.4877	104.344	99.4001	106.4	102.257	102.15	96.587	103.417	97.5557	102.757	107.267	98.4229	97.0284	102.83	105.477	98.4241	101.449	97.0013	93.7583	98.2812	107.972	102.039	101.173	98.6432	96.6705
101.125	106.699	104.773	105.116	103.343	99.4775	97.239	96.6472	101.932	100.915	100.485	109.005	100.663	98.0472	97.6666	97.7525	108.879	103.625	96.3163	102.35	98.5112	99.951	96.7499	104.3	103.612	99.6309	104.215	98.5251	105.732	102.458	103.33	96.4336	105.193	96.9545	103.577	108.796	97.9798	97.9018	103.536	106.583	99.7575	100.413	97.9528	93.5425	98.9024	108.605	101.597	101.715	98.9883	96.8796
100.128	105.682	103.301	106.999	103.647	100.079	98.1579	97.6201	103.705	100.516	99.6583	110.089	100.141	100.034	96.7163	97.6275	109.218	103.641	95.1492	100.46	98.9335	99.6148	96.6161	103.097	105.579	100.145	103.187	99.6292	107.257	103.079	103.938	95.3328	104.344	96.2995	104.086	107.151	98.3556	96.6564	103.53	106.925	99.5432	102.512	97.0277	92.6746	97.5733	107.772	101.952	98.6674	100.117	97.1304
100.903	106.872	104.382	104.262	102.36	100.483	97.5253	98.2041	103.714	101.417	101.225	110.435	100.255	101.39	97.2733	96.7091	108.837	103.644	94.2572	100.881	98.6541	99.4691	96.8938	104.837	103.048	100.702	104.076	99.6277	109.838	101.13	103.857	97.529	105.011	96.8826	104.149	108.015	97.2796	96.5057	105.131	105.768	100.057	101.746	98.1183	92.2595	98.857	110.019	100.17	100.361	98.859	96.5609
101.52	106.961	103.47	105.236	102.774	102.021	97.5329	99.4025	103.565	103.069	100.396	109.029	100.134	99.3665	96.3718	97.2908	107.679	105.718	94.2501	100.88	98.4033	99.2711	95.5917	103.464	103.908	100.108	103.398	100.842	107.399	102.735	105.823	99.0582	103.48	97.665	104.348	108.251	96.7107	96.2043	103.813	106.868	99.6268	101.494	96.7739	92.1371	97.9309	109.67	102.566	99.7548	99.5588	96.9812
102.075	106.457	106.61	106.445	102.348	103.368	97.7511	100.752	103.984	101.571	98.7371	110.982	99.1553	99.0263	96.6616	98.003	108.915	105.709	93.9629	100.884	100.259	99.6381	96.9128	103.122	103.948	100.296	103.845	100.701	108.905	102.776	105.537	98.3401	103.524	98.2283	105.042	107.344	98.6657	97.4008	102.948	106.991	98.7375	102.945	97.3435	90.7289	97.848	109.542	102.369	99.8019	99.9481	97.2433
99.6031	107.52	105.122	106.35	103.833	102.267	98.9655	100.77	105.716	103.79	101.428	109.274	101.233	100.6	97.2189	98.3535	109.364	106.322	96.0769	102.944	99.7498	100.392	96.6021	103.813	102.595	102.869	105.111	101.666	111.303	103.832	107.386	101.176	104.84	97.2333	103.902	107.628	98.459	97.2912	105.022	108.284	99.2614	101.882	98.408	91.3945	98.8725	109.05	100.855	100.864	100.506	95.5287
101.432	106.598	105.254	105.7	103.157	104.055	97.9579	101.774	105.993	104.68	102.052	110.611	101.487	99.2475	95.6453	97.1727	109.708	106.483	96.6134	101.01	99.985	99.7999	96.592	104.707	103.69	102.696	104.15	101.877	109.026	105.071	105.701	101.049	102.445	96.9018	105.974	108.39	97.8795	97.1244	104.914	108.082	101.103	101.774	97.5913	90.993	99.0202	109.408	100.082	100.833	100.755	96.8549
101.37	108.442	104.562	106.577	102.378	103.814	98.6542	103.084	104.35	103.353	101.448	111.527	101.87	100.489	95.744	97.5633	109.725	107.051	97.3643	100.657	100.535	100.299	97.2404	105.544	103.621	102.419	104.327	101.865	110.388	104.47	105.09	103.549	104.038	98.4107	107.004	110.055	98.8178	97.558	102.786	108.323	100.517	103.284	98.4131	90.8514	98.6543	111.763	101.977	101.749	100.771	98.0959
102.561	108.451	106.174	105.853	102.502	103.816	98.4261	103.932	104.57	105.726	100.135	109.082	102.683	100.576	97.1113	98.0049	109.358	107.865	98.4731	99.2437	99.4724	99.4627	96.4257	105.117	103.958	103.677	103.949	101.086	109.863	106.028	106.245	102.456	106.224	97.9401	106.744	107.857	98.7558	97.1082	105	110.787	99.6134	104.041	98.0995	92.906	98.6662	108.685	101.716	101.731	101.167	95.4393
101.267	108.222	107	104.751	102.539	103.099	98.2968	104.495	104.708	104.525	100.121	110.171	101.947	99.4795	96.2335	97.9636	110.167	108.918	97.5977	100.582	101.257	97.9101	95.6204	102.673	104.32	103.713	104.858	101.589	109.973	105.116	109.243	104.428	105.421	98.4653	107.118	106.798	100.053	98.0652	102.742	110.933	100.412	102.516	98.7007	92.8462	99.5049	109.464	100.565	100.788	101.348	95.7542
101.471	106.612	105.415	106.287	102.605	105.505	98.7809	104.148	105.267	106.333	100.844	112.186	103.178	101.564	96.229	97.4806	111.258	108.279	96.6247	101.943	100.634	101.595	95.5497	103.199	101.432	103.237	103.869	101.616	108.084	103.42	108	103.094	106.299	98.846	107.056	108.74	99.4961	98.9102	103.961	113.046	100.173	103.045	98.5017	91.1802	99.1117	109.888	102.271	102.006	101.536	97.1803
101.3	108.301	108.227	106.04	103.17	105.142	98.1431	104.776	105.698	106.511	101.929	109.752	101.725	99.8066	96.417	97.6947	110.851	109.354	98.1713	100.042	101.733	101.098	95.1885	105.484	102.914	104.325	104.586	100.643	109.411	105.664	107.274	100.509	105.132	99.8615	106.928	107.938	98.6375	97.1033	103.852	112.848	101.595	103.186	98.0169	91.5416	98.8852	110.859	103.425	101.479	101.579	97.9792
100.622	107.773	106.128	106.155	102.39	105.563	97.7333	106.185	104.867	105.755	101.678	110.053	105.048	100.325	94.0224	96.8238	111.277	110.018	99.0149	100.144	100.711	101.317	96.0706	106.284	103.058	105.797	104.572	102.077	110.554	105.168	106.476	100.635	105.79	99.5707	106.422	109.028	99.5314	96.3912	102.711	114.413	100.775	103.358	99.0168	92.8183	100.116	111.469	102.994	100.905	102.422	97.0978
100.68	106.681	104.759	105.886	103.432	105.469	98.7992	104.834	105.441	107.436	100.101	108.31	104.427	102.069	94.3207	97.7884	112.777	108.106	100.104	101.154	99.6398	101.168	96.8688	105.912	103.951	106.009	104.847	101.12	109.334	105.128	108.946	100.65	105.575	99.9107	105.843	108.634	98.5022	98.4107	102.878	114.386	101.786	103.671	99.5484	92.9868	98.8084	111.705	102.732	102.482	102.143	96.3773
101.244	105.783	106.9	105.694	104.284	107.833	98.3981	105.582	105.33	104.979	100.323	109.61	102.773	102.424	93.738	97.6751	112.279	110.045	98.2081	100.571	100.288	100.387	97.6392	104.999	103.024	105.721	106.463	101.879	109.173	104.955	107.771	100.132	106.433	98.8001	106.146	107.792	100.081	98.3953	104.183	115.102	101.911	103.768	98.7339	93.0832	99.0384	109.819	103.328	101.639	103.287	96.528
102.337	106.942	108.028	105.32	104.525	105.312	97.1144	106.868	105.274	106.731	100.721	111.468	103.343	101.564	93.5311	97.5112	111.463	109.892	100.896	101.622	100.093	101.418	95.983	104.316	105.373	108.112	106.36	101.856	110.611	103.743	108.889	100.375	106.436	100.323	106.428	108.598	101.4	98.6105	102.279	114.781	102.746	102.393	98.0993	92.7178	100.215	109.891	102.36	101.287	102.042	96.9171
101.734	108.678	108.384	105.545	105.952	105.078	98.345	104.787	106.19	107.223	99.7091	111.266	101.751	101.403	94.0805	97.3921	110.987	111.216	98.5396	99.5867	100.422	100.666	97.2397	103.096	104.846	107.861	106.48	102.793	109.65	106.54	108.105	100.657	105.88	98.604	106.412	109.672	100.971	98.8075	103.114	115.09	103.62	105.66	99.0456	92.6995	99.6879	108.801	102.973	100.11	103.785	96.5964
103.15	107.05	108.707	105.694	103.028	105.611	98.3082	103.131	105.732	107.405	100.438	109.957	102.496	102.235	95.4301	99.0194	110.646	110.905	98.9367	98.7696	99.016	101.251	96.424	105.32	104.351	107.237	106.795	101.59	110.458	104.351	108.574	101.392	104.723	98.6359	106.689	110.578	101.271	98.4038	102.58	117.578	103.584	103.947	99.028	94.1654	99.923	110.19	103.532	101.835	103.818	96.6854
101.171	108.72	108.953	105.361	105.853	106.367	98.1743	103.023	106.378	107.283	100.267	108.738	102.614	102.305	94.3388	97.5168	110.607	112.125	97.8986	100.241	99.8453	101.652	96.1222	104.466	104.313	108.732	106.734	100.856	110.869	105.712	111.459	102.145	106.786	100.149	107.96	110.807	100.198	100.585	101.891	117.772	105.646	102.259	98.576	92.8365	98.8375	110.218	103.103	101.557	103.111	96.3991
103.109	108.307	109.744	105.594	104.456	106.288	98.4529	101.937	105.486	107.793	100.399	110.691	104.25	103.289	94.2271	99.0937	112.216	111.963	99.9564	100.564	102.239	100.252	97.2482	105.281	105.502	108.879	104.858	102.773	110.812	105.094	109.579	102.746	105.963	99.8003	107.969	109.806	100.968	99.6731	100.937	117.062	106.086	105.436	99.9618	93.0719	100.866	110.187	104.909	101.96	104.284	96.6018
102.781	107.655	108.785	106.205	104.71	107.72	99.301	102.525	106.514	107.232	100.003	111.115	102.464	103.047	94.5119	98.8774	110.619	112.393	100.086	100.618	101.501	101.8	96.9561	105.35	105.136	109.283	107.275	103.046	111.304	105.907	110.813	102.027	106.77	99.7318	106.436	108.279	100.545	100.891	100.962	117.293	107.113	105.05	100.497	95.3099	99.5387	109.939	104.582	102.271	103.467	96.2629
101.916	109.728	108.23	105.138	105.189	108.846	97.6263	103.11	106.307	108.641	100.208	109.716	104.212	101.984	94.1731	98.4615	109.863	111.905	100.776	99.7772	101.746	102.938	97.1753	103.276	106.434	110.432	107.753	103.972	108.88	106.793	110.505	102.364	107.477	100.873	105.151	109.316	101.097	99.8993	102.575	119.296	106.902	104.215	99.3281	95.6455	100.289	111.341	104.125	101.743	102.866	96.9198
101.827	109.786	107.604	106.402	106.038	107.211	99.9091	102.714	106.962	109.547	97.8688	111.256	102.572	102.499	92.7505	98.8401	109.412	112.244	101.482	100.442	102.001	102.31	97.228	103.857	104.518	108.339	105.315	103.606	112.791	105.824	110.029	102.763	107.445	99.9992	106.423	107.94	99.6489	101.174	101.262	118.499	108.604	104.102	99.4342	96.3954	101.239	109.685	105.194	102.156	103.524	97.3007
100.639	109.61	108.543	106.341	106.838	107.58	100.633	103.312	106.904	109.074	99.6478	111.61	103.309	103.519	92.7164	98.1005	108.89	112.933	98.3846	99.4176	103.421	100.83	97.7268	104.339	105.446	110.82	106.947	102.377	112.024	104.17	111.124	103.025	105.14	99.4569	105.234	107.485	100.447	101.415	100.562	119.227	108.591	104.372	99.2153	96.0889	101.787	111.066	105.449	103.215	105.724	96.5592
101.968	108.416	110.175	106.113	105.665	107.322	98.8796	104.01	106.821	109.115	100.226	110.178	103.576	103.156	93.654	96.863	109.837	112.518	100.298	101.42	101.538	101.46	97.5016	103.551	106.563	111.825	106.694	103.053	112.295	104.09	109.341	101.646	105.394	100.211	105.902	107.819	99.8595	101.625	101.116	118.806	108.173	102.946	101.313	97.1185	101.516	111.103	105.576	102.125	105.368	97.0933
102.206	108.801	109.471	105.348	105.862	109.376	98.8398	104.469	108.05	108.207	100.04	110.166	104.827	103.932	94.1516	97.6969	111.148	113.28	103.454	100.915	101.124	102.607	97.15	103.852	105.429	111.418	107.322	102.658	111.79	103.824	111.504	103.376	105.574	101.186	107.05	110.01	100.532	100.666	100.576	119.244	108.498	102.583	101.539	98.5284	100.484	109.237	106.458	102.634	105.64	98.2617
100.655	108.742	109.455	105.863	107.694	109.064	100.937	103.952	107.396	106.591	99.7838	109.306	102.258	103.807	94.494	98.2501	110.253	112.315	102.969	103.641	102.052	100.152	97.7749	103.349	105.535	110.952	106.172	104.972	112.975	105.026	111.997	104.397	105.531	99.956	106.423	108.947	99.8778	102.239	101.358	118.48	110.263	103.09	99.5779	97.7118	102.33	109.628	106.945	101.757	105.335	96.058
100.895	109.457	110.049	105.802	107.064	107.693	98.1221	103.187	107.118	107.694	100.642	109.969	104.479	103.288	94.8132	97.835	109.906	112.889	103.092	101.22	102.091	102.464	98.6305	104.385	106.56	111.934	107.98	103.312	111.833	105.871	110.087	105.326	105.62	100.99	105.641	109.276	101.045	102.011	101.505	119.443	110.529	103.972	101.522	99.0068	101.6	108.157	105.088	102.329	105.134	96.8127
100.845	107.673	110.209	106.737	105.843	110.125	98.8418	105.584	106.506	107.82	99.3882	108.726	103.64	104.689	95.4075	98.084	109.653	112.025	103.569	101.454	103.639	102.432	97.4104	104.224	108.599	111.25	108.119	103.132	113.093	106.253	109.703	105.7	106.086	102.902	107.252	109.359	100.991	103.051	101.805	119.63	110.981	103.855	102.6	97.1444	102.201	109.479	103.952	103.377	105.425	97.2052
102.584	108.843	108.322	106.911	108.079	109.95	98.4615	104.941	106.522	108.955	99.9887	109.856	102.419	102.953	95.0996	99.1981	109.783	112.188	103.497	101.915	102.655	101.689	97.081	104.256	108.186	108.193	109.127	103.509	111.796	105.459	111.449	104.345	104.299	102.331	107.029	110.054	101.123	102.371	100.738	119.965	111.464	102.686	102.129	99.6196	103.657	109.426	106.787	102.289	106.086	95.9119
102.807	109.067	109.389	104.693	108.68	109.229	99.37	106.451	107.106	109.498	99.4219	111.465	104.226	102.931	95.2128	99.7651	110.906	110.86	103.451	102.532	102.892	102.055	97.484	102.956	107.467	110.879	107.283	104.269	111.807	104.85	110.268	105.018	107.365	102.692	105.412	108.759	100.97	102.738	102.737	119.933	111.887	103.33	103.143	99.0537	103.447	111.97	106.946	102.853	105.903	96.1702
101.179	108.765	109.089	105.262	108.991	108.61	99.3214	105.376	107.961	110.26	99.6599	109.277	104.206	103.625	95.6579	100.138	110.32	112.511	104.018	102.339	102.505	100.997	97.4096	104.114	108.308	108.861	107.367	104.724	113.485	104.851	110.517	104.439	107.811	101.529	106.43	106.908	100.469	103.291	102.4	119.483	111.672	103.307	103.242	99.537	104.97	109.471	107.703	103.372	107.462	97.0372
101.914	109.001	109.637	105.211	108.04	109.668	99.7478	106.294	108.157	109.194	100.325	110.365	105.492	102.926	98.4266	100.524	110.634	111.902	104.428	102.278	102.65	103.633	98.828	103.281	108.389	111.991	108.104	103.963	111.231	107.566	111.117	106.198	108.311	102.907	105.356	109.51	100.67	104.267	103.923	119.223	111.829	102.535	102.632	99.4478	102.871	111.034	105.916	103.444	105.977	96.9977
101.938	107.529	109.102	105.199	107.799	110.973	100.489	105.523	109.726	108.668	99.432	110.48	103.217	105.144	94.7671	99.3266	109.736	111.375	105.223	102.861	102.303	101.526	97.2539	104.539	107.38	111.58	107.344	104.319	110.346	105.289	111.31	105.672	105.581	103.404	103.648	110.118	100.906	105.296	102.195	119.287	113.427	102.652	103.349	101.086	104.198	109.589	107.392	102.718	106.656	99.7438
101.011	109.371	110.125	106.693	107.669	109.282	100.32	104.677	107.356	108.182	99.7711	108.256	102.968	103.359	95.5374	99.2906	109.325	110.612	104.781	101.413	101.949	102.753	96.425	105.375	106.703	109.915	108.402	105.54	111.668	104.325	109.921	105.896	107.887	104.317	105.018	109.226	100.789	105.206	102.002	118.462	114.11	102.11	102.34	98.8971	103.376	112.785	106.502	103.05	105.373	98.5772
103.439	108.066	108.746	104.503	109.178	109.182	100.954	106.277	107.461	108.788	99.5434	108.829	102.085	104.392	95.5064	98.3683	108.823	110.051	105.573	102.36	102.979	102.223	97.5619	104.003	106.876	112.258	108.181	103.231	113.515	108.032	109.373	106.625	106.044	102.889	104.86	109.283	101.585	105.879	102.334	119.877	114.104	102.215	104.221	99.6339	103.317	111.317	107.58	103.265	106.903	96.5983
103.487	109.68	110.551	106.221	106.623	109.807	100.995	105.167	109.036	108.343	100.511	110.27	103.918	104.714	94.9352	100.041	109.499	111.178	104.814	103.821	101.807	103.109	98.9559	103.155	109.362	111.068	108.746	104.796	110.841	106.751	109.623	108.403	105.281	103.947	104.685	110.952	102.239	105.997	103.737	119.857	114.228	102.774	104.428	98.0464	104.04	113.881	106.096	103.656	105.771	98.1688
102.206	109.751	110.118	104.962	108.379	107.964	101.027	107.503	109.453	108.945	101.493	109.266	103.502	104.357	94.8871	99.5246	110.144	110.142	106.735	102.027	102.016	101.822	97.7769	104.901	106.933	110.606	107.933	103.931	113.558	107.135	110.444	106.853	107.175	103.155	103.875	109.329	101.042	106.124	103.558	117.691	113.92	102.111	102.864	99.1708	103.283	112.341	107.305	102.378	106.211	97.6652
102.238	109.731	109.695	106.13	107.544	109.329	101.031	105.377	110.165	109.677	100.705	108.544	104.476	105.345	94.8803	99.1505	109.433	111.289	105.365	101.972	101.132	101.704	96.5692	104.489	107.274	111.591	107.323	103.451	113.499	107.576	109.73	107.264	105.998	103.44	104.483	108.244	100.74	107.006	102.626	119.017	113.66	102.928	103.201	99.503	104.54	113.458	104.789	103.117	106.496	100.235
102.331	107.37	109.695	104.834	107.627	109.17	102.733	106.881	109.179	108.625	101.583	108.716	104.127	103.455	93.6025	100.423	110.238	109.704	106.32	102.172	102.851	103.333	98.8799	103.845	104.284	111.965	108.864	103.976	112.965	106.601	112.562	106.153	106.246	103.132	104.598	109.985	100.62	107.064	103.529	119.395	114.212	102.938	104.669	98.4292	104.281	113.021	105.948	104.15	108.393	100.487
[truncated: 233 more columns]
