# Supplementary material for: A mechano-osmotic feedback couples cell volume to the rate of cell deformation
Source: eLife journal article supplement (doi:10.7554/elife.72381), 2022-04-13
Supplement: supp [file 20211118 hela embl 5h spreading stream.xlsx]

## Sheet: Sheet1
stdev	27.8362	16.4855	20.5714	22.5219	22.577	21.981	27.1309	23.266	21.1128	25.8973	24.3353	27.1554	25.0091	18.2221	21.3777	20.6202	29.3249	22.9829	25.8979	22.4747	26.4085	28.195	24.8446	19.887	26.3478	20.467	18.0171	30.6448	30.5684	22.6134	28.595	27.8955	36.7767	37.559	25.0318	14.9182	25.4597	25.7293	27.713	29.2842	27.9584	27.4823	21.3825	31.1332
mean	3412.16	2175.5	2629.48	2995.34	3504.61	2370.22	2208.52	2086.16	2781.64	2930.12	3262.04	3074.59	3113.56	2942.19	2004.92	1910.19	2734.63	2229.34	2794.41	2090.51	2532.96	3694.56	2609.5	1991.47	2188.91	3611.98	2198.61	3271.97	2234.11	2576.66	2221.88	2068.39	2688.58	2843.28	3922.61	1530.77	2634.83	2165.99	2431.93	3159.46	2560.23	2993.93	2122.66	2718.5
CV	0.00815796	0.00757778	0.00782337	0.00751897	0.00644208	0.00927383	0.0122847	0.0111526	0.00759006	0.00883831	0.00746015	0.00883219	0.0080323	0.00619339	0.0106626	0.0107948	0.0107235	0.0103093	0.00926777	0.0107508	0.0104259	0.0076315	0.00952081	0.00998606	0.0120369	0.00566642	0.0081948	0.00936583	0.0136826	0.00877623	0.0128697	0.0134865	0.0136789	0.0132097	0.00638141	0.00974555	0.00966274	0.0118788	0.0113955	0.00926872	0.0109203	0.00917933	0.0100735	0.0114523
	1	1	1	1	1	1	2	2	2	2	2	2	2	2	2	3	3	3	3	3	3	3	3	3	4	4	4	4	4	4	5	5	5	5	5	5	5	5	6	6	6	6	6	6
	1	2	3	4	5	6	1	2	3	4	5	6	7	8	9	1	2	3	4	5	6	7	8	9	1	2	3	4	5	6	1	2	3	4	5	6	7	8	1	2	3	4	5	6
0	3386.83	2174.98	2611.87	3004.43	3495.15	2382.41	2234.28	2086.17	2784.5	2934.18	3281.02	3113.48	3103.85	2990.09	2000.9	1914.33	2759.81	2194.11	2768.12	2110.81	2530.97	3710.15	2628.01	1998.19	2163.89	3607.67	2206.6	3286.09	2246.01	2583.68	2233.35	2069.57	2748.06	2875.82	3927.23	1514.91	2615.71	2205.94	2418.04	3156.87	2561.83	3028.53	2121.93	2725.67
30	3417.76	2155.71	2622.03	3022.36	3527.25	2344.1	2225.3	2129.15	2777.04	2917.38	3224.22	3099.72	3095.7	2946.15	2005.97	1911.14	2684.54	2190.62	2816.28	2107.88	2519.1	3696.68	2618.08	1960.98	2219.1	3597.83	2207.31	3255.39	2272.66	2573.35	2198.02	2115.74	2696.51	2830.83	3899.38	1550.5	2647.94	2160.89	2466.11	3128.07	2583.01	2975.84	2096.89	2680.48
60	3349.83	2175.11	2643.71	2995.81	3500.73	2340.31	2192.76	2092.48	2777.49	2950.89	3253.49	3127.26	3080.01	2952.39	2034.11	1915.06	2745.8	2255.69	2752	2131.53	2498.97	3679.46	2609.37	1999.26	2214.63	3625.18	2194.99	3303.63	2256.96	2595.67	2190.76	2053.55	2731.91	2851.12	3923.34	1548.08	2648.71	2204.17	2441.46	3134.18	2545.56	3000.48	2099.07	2721.66
90	3413.45	2179.94	2638.55	3044.66	3541.23	2365.95	2228.8	2088.18	2793.6	2932.74	3266.53	3076.53	3129.6	2941.53	1987.8	1943.93	2779.38	2250.13	2794.07	2074.97	2560.83	3731.21	2601.04	2030.43	2185.75	3604.7	2193.98	3262.55	2234.13	2605.9	2215.69	2098.71	2661.6	2861.46	3925.42	1527.47	2651.78	2162.27	2445.06	3148.48	2587.68	3008.29	2097.44	2719.66
120	3374.25	2166.16	2679.03	3007.94	3521.3	2378.18	2191.28	2102.09	2788.55	2979.12	3228.45	3043.22	3081.64	2952.35	2065.94	1917.85	2725.99	2175.41	2820.21	2075.31	2502.17	3709.05	2605.73	2017.85	2187.52	3651.93	2245.34	3252.91	2188.73	2613.07	2252.05	2079.6	2698.51	2845.92	3970.07	1544.89	2667.48	2150.53	2472.22	3165.08	2533.27	3025.21	2125.64	2715.16
150	3385.66	2177.66	2613.18	2974.14	3562.6	2362.84	2225.36	2073.97	2772.77	2933.14	3252.55	3074.35	3096.56	2955	2007.09	1896.14	2761.61	2190.83	2827.62	2117.86	2527.5	3657.15	2673.36	1998.05	2177.08	3632	2205.81	3266.43	2246.94	2591.24	2239.43	2079.38	2669.05	2871.19	3966.73	1525.37	2660.06	2157.27	2452.11	3186.2	2586.84	3009.37	2096	2697.18
180	3359.97	2148.49	2673.72	2933.58	3525.95	2368.92	2216.36	2092.75	2784.16	2950.33	3260	3106.51	3135.26	2942.21	1958.14	1927.3	2758.78	2253.55	2820.5	2108.82	2518.1	3721.38	2609.25	2002.13	2199.34	3620.25	2167.98	3295.09	2236.02	2616.01	2207.55	2113.81	2657.9	2854.7	3989.36	1536.56	2633.18	2133.93	2409.83	3173.34	2572.28	2992.05	2144.23	2667.15
210	3414.67	2174.69	2643.3	2962.08	3531.61	2379.13	2201.14	2062.46	2788.17	2934.37	3250.24	3098.79	3119.43	2962.36	1985.58	1931.47	2723.65	2222.28	2794.79	2128.16	2515.5	3684.9	2656.08	2008.6	2196.82	3623.76	2187.76	3271.3	2216.01	2597.81	2234.56	2052.67	2681.13	2887.93	3934.13	1541.74	2594.18	2163.93	2452.92	3227.82	2554.98	2990.33	2146.83	2718.31
240	3402.71	2174.59	2638.1	2981.38	3493.02	2344.7	2184.27	2103.14	2780.75	2940.91	3263.45	3095.23	3086.49	2942.65	2016.01	1923.45	2767.63	2236.95	2802.08	2109.26	2555.32	3702.63	2634.02	1979.82	2210.75	3605.35	2205.88	3324.41	2243.32	2606.12	2230	2076.74	2720.37	2843.78	3917.98	1526.38	2669.38	2146.58	2450.45	3161.1	2567.46	2935.75	2138.62	2724.94
270	3428.64	2167.17	2576.79	2990.91	3487.03	2347.68	2181.47	2113.98	2769.31	2909.89	3268.49	3069.72	3140.5	2958.19	1986.04	1928.1	2745.94	2218.43	2806.11	2107.03	2573.04	3700.56	2647.86	1980.09	2212.25	3611.91	2191.06	3275.42	2262.26	2552.35	2224.52	2080.89	2686.27	2901.32	3944.36	1532.21	2654.39	2151	2445.87	3138.39	2511.08	3004.94	2147.82	2721.51
300	3403.46	2187.81	2616.64	3008.25	3500.5	2343.35	2174.67	2069.99	2757.53	2952.94	3231.76	3093.94	3131.25	2956.95	1978.47	1925.1	2742.88	2219.14	2741.28	2085.08	2551.97	3724.7	2615.95	2022.24	2211.05	3647.15	2183.12	3313.58	2270.32	2537.27	2194.47	2085.56	2743.49	2854.9	3947.19	1557.12	2652.8	2157.62	2413.07	3162.65	2553.37	3043.64	2112.34	2671.21
330	3375.08	2196.05	2656.92	2938.2	3518.55	2382.07	2178.03	2089.81	2792.49	2959.12	3252.34	3030.96	3120	2956.21	2010.37	1931.92	2697.73	2195.23	2814.51	2100.6	2587.08	3643.47	2637.78	2018.39	2229.76	3576.31	2184.66	3317.37	2224.8	2613.48	2181.23	2032.75	2688.62	2884.63	3952.94	1519.46	2641.96	2202.56	2443.67	3181	2540	2964.24	2144.45	2752.98
360	3389.29	2175.28	2603.76	2943.69	3496.56	2362.84	2189.8	2061.97	2789.45	2933.8	3295.18	3102.56	3145.13	2960.23	2028.77	1915.47	2717.36	2168.63	2801.64	2087.02	2534.57	3680.41	2596.17	1970.96	2191.65	3618.28	2215.53	3303.56	2245.25	2596.03	2241.2	2063.17	2714.11	2859.26	3964.56	1544.71	2651.32	2174.17	2438.84	3172.62	2528.87	3014.22	2121.13	2706.64
390	3378.44	2196.32	2654.3	2982.46	3536.16	2367.03	2204.65	2114.73	2765.93	2933.07	3263.98	3085.4	3132.68	2927.76	2039.76	1870.8	2715.77	2240.91	2778.84	2093.28	2577.66	3727.49	2599.58	1987.34	2182.81	3614.04	2191.93	3277.14	2246.55	2594.56	2192.79	2100.33	2702.7	2812.14	3916.68	1520.5	2641.99	2182.62	2421.78	3186.41	2601.21	2975.57	2136.14	2738.48
420	3386.97	2167.82	2613.39	3010.5	3519.62	2364.8	2234.49	2097.69	2768.37	2978.63	3278.14	3073.84	3127.25	2959.5	1965.4	1915.81	2734.95	2225.47	2832.56	2087.48	2497.48	3654.66	2611.83	1993.09	2179.23	3619.77	2202.03	3300.68	2248.25	2630.4	2244.36	2082.71	2730.05	2896.26	3926.87	1516.56	2628.2	2183.42	2464.7	3189.66	2625.61	2986.02	2136.63	2697.54
450	3383.67	2177.47	2648.61	3002.49	3490.51	2362.68	2250.58	2104.69	2792.85	2923.63	3247.38	3103	3184.13	2974.26	1986.34	1923.29	2693.74	2216.89	2834.37	2111.22	2501.65	3680.9	2612.23	1989.65	2210.36	3609.11	2205.29	3275.48	2206.63	2525.16	2199.74	2044.05	2713.58	2847.8	3897.86	1534.55	2639.83	2212.37	2444.3	3157.05	2565.42	2995.05	2135.6	2685.81
480	3369.53	2177.1	2586.39	2992.59	3511.21	2338.69	2178.3	2120.48	2741.15	2910.58	3280.58	3093.09	3105.62	2963.01	2003.32	1914.6	2679.61	2209.4	2800.01	2080.68	2544.51	3671.01	2652.21	1995.59	2177.43	3613.84	2202.52	3243.24	2201.82	2616.38	2214.75	2095.13	2682.47	2922.48	3922.41	1518.96	2608.26	2171.02	2437.04	3198.77	2554.63	3025.36	2130.81	2721.21
510	3405.21	2200.08	2634.72	2989.06	3548.36	2326.22	2199.71	2088.87	2783.62	2927.46	3289.78	3080.84	3109.44	2931.97	2010.45	1929.72	2739.6	2239.72	2834.21	2060.1	2545.05	3672.05	2608.13	1980.42	2200.19	3631.14	2214.79	3305.64	2225.39	2562.28	2191.39	2067.38	2756.72	2830.97	3917.72	1565.9	2655.41	2158.45	2442.82	3139.11	2616.1	3021.28	2110.53	2712.24
540	3409.72	2184	2633.05	3002.02	3573.84	2342.61	2227.18	2100.32	2758.33	2915.67	3303.34	3097.47	3128.76	2940.26	2005.17	1881.51	2714.05	2236.61	2798.14	2123.58	2553.11	3714.31	2589	2018.19	2206.54	3593.06	2202.62	3291.04	2256.52	2584.33	2239.47	2095.79	2663.19	2882.47	3916.41	1552.18	2645.89	2191.49	2469.33	3182.66	2532.79	3027.46	2119.47	2710.01
570	3408.58	2165.3	2645.03	3011.03	3524.06	2359.17	2253.29	2101.28	2755.84	2923.57	3257.05	3057.55	3150.14	2950.1	1983.55	1913.63	2710.4	2263.63	2762.03	2093.53	2515.57	3676.94	2567.09	1979.33	2214.78	3622.99	2177.97	3214.16	2182.44	2568.92	2236.1	2038.87	2698.9	2836.07	3973.33	1536.82	2629.97	2175.44	2424.38	3148.05	2597.19	2999.32	2144.71	2743.98
600	3402.74	2163.06	2594.62	3036.5	3487.89	2376.58	2184.8	2118.01	2803.25	2935.17	3230.6	3106.9	3102.64	2964.69	1997.89	1903.69	2702.08	2226.29	2706.16	2109.94	2506.88	3753.03	2622.95	1980.09	2208.73	3625.03	2238.27	3292.66	2256.05	2575.7	2240.01	2044.08	2708.21	2846.38	3950.17	1549.96	2636.1	2187.7	2420.48	3116.39	2558.21	2977.92	2115.55	2716.69
630	3383.05	2142.74	2619.15	2979.29	3523.28	2344.26	2168.11	2093.71	2766.91	2899.42	3283.62	3099.9	3137.16	2968.25	1980.91	1913.97	2727.3	2242.09	2786.03	2066.07	2553.2	3692.29	2662.22	2009.24	2174.02	3612.92	2209.26	3301.18	2264.49	2555.46	2234.84	2024.72	2693.21	2845.94	3935.14	1537.55	2599.25	2198.09	2441.13	3188.56	2538.48	3040.64	2103.43	2734.76
660	3430.59	2157.39	2649.92	3002.32	3499.13	2347.34	2218.19	2075.76	2791.86	2964.53	3261.89	3027.13	3138.88	2947.95	2009.43	1908.3	2718.34	2221.31	2855	2126.31	2534.06	3755.93	2603.98	1972.04	2250.72	3625.93	2205.11	3279.93	2298.9	2576.42	2245.07	2053.89	2657.72	2833.63	3928.72	1541.95	2672.63	2156.48	2440.24	3187.46	2551.56	3011.26	2131.4	2778.54
690	3403.87	2172.29	2673.53	2997.11	3497.46	2379.5	2208.63	2107.48	2789.03	2960.39	3263.72	3077.7	3093.11	2999.98	2010.08	1951.42	2710.54	2229.98	2822.1	2069.14	2532.75	3693.17	2611.63	2035.98	2169.22	3590.11	2214.81	3305.02	2279.76	2585.77	2207.98	2056.1	2690.86	2859.74	3938.35	1553.76	2655.62	2174.72	2436.5	3128.31	2574.99	2978.99	2130.29	2719.03
720	3408.35	2171.8	2623.14	3014.34	3505.53	2367.98	2239.4	2119.17	2820.27	2906.47	3296.05	3084	3108.92	2920.24	1995.3	1916.2	2739.48	2215.49	2763.83	2079.54	2511.91	3716.05	2607.39	2003.38	2185.53	3626.14	2208.33	3289.41	2199.53	2581.63	2236.15	2057.99	2721.83	2821.53	3896.49	1524.33	2640.28	2189.08	2420.17	3142.84	2516.29	3021.26	2138.62	2774.88
750	3422.15	2180.75	2623.23	2990.72	3491.42	2388.53	2230.49	2069.19	2781.85	2954.78	3286.63	3122.64	3087.74	2960.35	2011.59	1901.97	2751.7	2240.82	2836.09	2057.65	2511.68	3702.78	2603.42	1983.23	2153.77	3638.71	2188.36	3300.82	2220.81	2587.71	2256.89	2079.39	2730.65	2833.2	3942.94	1543.64	2610.1	2166.62	2428.31	3085.24	2563.97	3015.02	2112.84	2666.76
780	3421.33	2172.05	2628.31	3006.3	3548.03	2362.42	2213.37	2107.8	2800.94	2964.74	3223.56	3105.31	3137	2969.06	2013.22	1889.16	2769.01	2232.81	2824.94	2119.71	2544.58	3658.92	2626.81	1996.99	2205.16	3607.57	2171.69	3268.33	2278.72	2583.14	2206.79	2040.8	2686.78	2903.38	3908.01	1504.03	2659.42	2163.17	2429.95	3161.98	2575.93	2971.33	2104.13	2760.63
810	3418	2186.4	2606.5	2997.69	3540.78	2349.84	2173.82	2094.1	2818.37	2882.91	3254.41	3077.38	3137.18	2957.67	2014.83	1893.45	2756.32	2274.21	2817.58	2105.24	2566.23	3675.24	2624.42	2002.23	2222.23	3633.58	2219.9	3284.51	2233.37	2571.81	2193.3	2068.51	2723.39	2890.85	3929.99	1532.73	2607.54	2134	2459.66	3160.42	2517.31	3087.71	2139.34	2702.38
840	3403.61	2174.35	2628.38	2979.54	3510.81	2377.67	2168.58	2107.42	2794.86	2959.71	3276.5	3072.79	3114.13	2951.15	2035.76	1951.81	2728.62	2235.03	2800.36	2106.01	2536.61	3669.1	2655.47	1963.88	2215.86	3605.11	2195.34	3322.78	2257.96	2608.22	2218.54	2072.3	2743.56	2863.58	3881.32	1526.25	2583.85	2177.9	2440.17	3115.86	2584.53	2946.48	2120.81	2744.35
870	3386	2176.53	2593.94	2995.02	3513.02	2394.9	2228.72	2074.35	2778.46	2936.34	3213.16	3035.66	3084.54	2960.19	2013.96	1934.92	2789.68	2198.84	2838.02	2086.66	2551.59	3755.8	2633.43	2003.73	2208.7	3641.49	2179.16	3264.8	2176.11	2578.72	2174.83	2085.32	2689.24	2897.51	3889.71	1522.27	2595.54	2142.49	2385.05	3135.53	2585.13	3001.16	2121.58	2728.71
900	3414.98	2175.1	2609.17	3011.43	3489.87	2384.37	2211.1	2080.43	2807.47	2911.15	3280.96	3077.96	3117.57	2941.94	2007.16	1906.66	2760.66	2251.72	2786.16	2157.94	2519.91	3728.5	2588.18	1988.64	2223.71	3625.69	2211.92	3277.93	2158.17	2576.79	2202.13	2083.08	2666.18	2796.13	3943.5	1513.12	2635.72	2145.94	2476.34	3162.64	2567.8	3017.76	2137.16	2810.48
930	3411.88	2187.07	2629.86	2968.17	3530.4	2355.88	2220.15	2084.49	2775.48	2938.8	3353.7	3062.83	3154.11	2943.98	1998.94	1923.31	2752.12	2264.07	2808.54	2067.56	2535.5	3723.5	2643.84	1957.73	2169.65	3625.89	2171.18	3268.31	2251.07	2590.79	2201.77	2087.97	2713.13	2818.51	3955.74	1549.87	2624.04	2165.4	2402.22	3187.29	2555.15	3004.78	2170.79	2742.21
960	3392.29	2172.38	2603.73	3025.97	3467.5	2346.97	2247.58	2077.5	2765.89	2944.1	3274.5	3110.6	3110.83	2920.73	1982.2	1946.85	2712.66	2199.14	2782.63	2099.63	2539.88	3742.63	2602.32	2014.87	2205.36	3610.65	2191	3324.45	2253.53	2576.29	2243.83	2123.3	2646.9	2874.24	3932.66	1559.38	2655.21	2152.39	2431.49	3133.26	2572.57	3031.31	2132.27	2738.91
990	3394.46	2165.23	2594.44	2997.31	3498.59	2387.4	2249.98	2084.65	2804.79	2904.37	3257.68	3061.62	3093.06	2966	2003.25	1924.95	2708.22	2263.73	2786.07	2121.88	2505.26	3682.15	2624.35	1994.46	2161.17	3657.95	2186.34	3260.91	2227.13	2604.23	2272.28	2047.24	2711.31	2775.63	3898.45	1539.37	2611.84	2145.44	2426.49	3095.89	2528.38	3039.26	2115.85	2801.24
1020	3434.16	2156.74	2660.62	2996.97	3520.64	2360.89	2196.56	2095.13	2732.58	2915.96	3275.09	3061.44	3134.26	2952.27	1992.55	1896.56	2675.28	2245.94	2807.92	2094.57	2527.97	3676.63	2634.1	2004.38	2238.52	3638.35	2217.12	3308.99	2262.25	2558.45	2233.91	2021.89	2640.68	2826.71	3948.61	1510.71	2662.35	2183.38	2384.44	3177.25	2604.61	2978.23	2126.67	2761.08
1050	3474.8	2220.28	2637.86	2989.81	3510.44	2364.26	2231.57	2106.17	2761.13	2937.03	3260.21	3096.03	3074.31	2961.62	1988.81	1917.61	2765.24	2243.63	2837.24	2080.18	2505.71	3735.57	2601.7	1978.48	2221.96	3626.29	2209.97	3271.1	2199.24	2598.85	2221.5	2074.1	2654.71	2846.52	3879.31	1537.36	2608.5	2171.11	2434.44	3147.19	2534.42	2994.68	2171.97	2721.93
1080	3396.22	2165.39	2641.29	2997.15	3476.82	2367.14	2221.41	2108.48	2778.99	2949.48	3229.46	3048.54	3113.75	2959.5	2001.96	1869.07	2768.44	2234.54	2802.38	2096.87	2561.01	3706.12	2611.02	2018.31	2181.77	3600.92	2218.67	3258.43	2182.14	2599.64	2231.26	2088.57	2648.05	2837.06	3922.63	1526.89	2638.57	2170.2	2439.59	3183.05	2565.47	3023.1	2102.21	2756.28
1110	3393.83	2171.8	2607.2	2992.62	3537.14	2386.04	2244.31	2082.89	2775.95	2928.43	3258.77	3027.88	3113.07	2941.89	1979.04	1912.9	2718.85	2221.83	2794.61	2070.62	2522.25	3709.2	2633.08	1991.43	2181.1	3594.75	2216.91	3274.39	2237.72	2607.91	2163.16	2061.17	2655.64	2847.84	3904.06	1537.45	2639.27	2154.23	2464.72	3199.76	2589.28	3007.59	2117.58	2751.58
1140	3477.82	2162.71	2645.34	3002.05	3477.77	2359.17	2225.2	2105.78	2803.29	2934.31	3295.43	3080.15	3120.33	2944.12	2003.45	1921.43	2711.01	2240.07	2788.59	2135.41	2535.98	3733.16	2599.76	1988.35	2234.29	3631.96	2209.18	3276.04	2242.45	2578.35	2219.97	2032.59	2701.67	2825.94	3949.72	1533.1	2653.71	2145.98	2463.38	3224.42	2508.46	3000.32	2102.92	2710.41
1170	3404.26	2189.85	2638.1	2985.78	3483.6	2398.66	2206.65	2088.61	2804.17	2915.56	3282.59	3036.53	3141.66	2937.39	1962.95	1882.53	2743.76	2238.44	2793.63	2091.95	2538.89	3720.7	2628	2039.19	2170.08	3604.72	2199.67	3293.13	2313.43	2559.84	2218.86	2049.26	2691.84	2839.4	3940.37	1531.5	2608.75	2169.17	2438.21	3120.01	2559.28	3008.73	2119.7	2666.09
1200	3425.5	2167.95	2655.32	3011.9	3505.11	2378.15	2211.61	2174.77	2809.02	2903.92	3275.17	3061.92	3100.54	2942.67	2013.93	1914.81	2700.49	2208.41	2784.15	2121.32	2591.18	3703.62	2591.37	2013.53	2151.8	3630.86	2200.97	3247.33	2245.77	2558.89	2200.57	2068.21	2689.97	2883.25	3931.26	1535.4	2666.7	2172.34	2392.28	3183.65	2612.64	3017.84	2127.09	2673.9
1230	3441.13	2186.57	2654.01	2997.41	3471.6	2385.2	2224.92	2067.67	2792.28	2960.82	3209.45	3060.89	3134.21	2949.47	2002.68	1881.77	2755.85	2205.37	2770.3	2131.42	2570.38	3682.21	2604.34	1966.04	2195.77	3604.78	2204.56	3317.62	2226.84	2554.42	2223.87	2099.13	2715.19	2849.55	3920.31	1511.61	2683.23	2185.75	2419.49	3141.07	2571.33	2944.86	2126.84	2702.82
1260	3401.77	2173.8	2646.69	2989.54	3529.71	2338.29	2230.14	2051.41	2731.09	2921.83	3280.34	3104.05	3097.94	2937.46	2011.83	1910.49	2688.04	2235.06	2837.74	2089.88	2526	3712.23	2623.88	2005.36	2173.64	3620.54	2173.96	3298.37	2226.75	2542.23	2189.83	2061.67	2688.27	2822.55	3948.67	1524.27	2653.17	2147.4	2416.19	3155.5	2554.7	2986.05	2130.36	2702.84
1290	3406.98	2156.91	2664.29	2976.53	3479.96	2345.75	2175.35	2090.76	2805.98	2915.49	3252.45	3058.39	3098.88	2932.6	2007.98	1933.04	2782.33	2228.8	2797.27	2109.47	2511.75	3701.05	2635.71	1966.56	2194.36	3607.6	2222	3295.73	2190.13	2583.43	2203.26	2070.11	2714.32	2885.11	3944.5	1521.16	2629.2	2181.59	2441.31	3161.7	2486.99	2954.23	2130.64	2749.43
1320	3439.84	2178.21	2647.25	3014.7	3514.43	2358.68	2198.83	2064.89	2791.62	2918.06	3272.94	3101.88	3091.21	2953.83	1965.92	1908.59	2706.81	2223.79	2794.45	2097.68	2515.65	3668.9	2603.95	1964.93	2201.66	3644.29	2202.26	3304.17	2259.12	2565.35	2182.07	2066	2726.12	2783.28	3942.58	1532.87	2662.05	2190.66	2390.05	3209.06	2574.92	3009.01	2116.58	2707.29
1350	3440.3	2155.55	2627.29	2981.06	3531.04	2386.04	2167.51	2070.79	2797.21	2949.02	3268.59	3059.56	3109.79	2950.96	1987.51	1908.82	2729.83	2224.43	2743.82	2088.04	2484.27	3660.42	2616.78	2023.63	2197.04	3603.14	2231.73	3265.98	2241.45	2581.63	2233.3	2073.36	2736.65	2800.87	3927.96	1536.58	2624.04	2141.83	2403.17	3205.74	2507.79	2990.89	2133.06	2676.92
1380	3449.23	2193.62	2615.99	3015.24	3558.88	2357.96	2236.16	2089.53	2794.65	2879.54	3232.19	3088.21	3169.23	2959.12	1977.63	1891.13	2719.93	2206.36	2817.35	2101.07	2509.76	3705.53	2631.03	1949.23	2210.24	3614.26	2237.68	3279.77	2217.37	2565.18	2193	2105.38	2760.27	2834.22	3985.07	1520.91	2641.01	2171.02	2447.83	3193.18	2572.64	2994.03	2106.58	2686.49
1410	3439.85	2166.17	2644.76	2980.2	3536.1	2353.29	2188.96	2079.1	2798.14	2962.81	3267.74	3041.7	3098.37	2918.26	1990.19	1891.79	2749.53	2196.29	2839.63	2081.87	2560.59	3689.51	2600.5	1993.29	2167.41	3619.88	2207.77	3284.52	2168.05	2569.68	2192.08	2089.77	2720.33	2882.13	3944.45	1536.49	2615.85	2170.64	2409.32	3158.07	2550.72	2974.47	2138.66	2707.18
1440	3431.17	2153.65	2641.2	3022.11	3522.13	2372.66	2169.81	2058.21	2792.17	2887.9	3290.03	3071.78	3157.23	2953.69	1987.5	1884.43	2753.02	2231.77	2836.43	2119.01	2563.08	3739.07	2640.31	2020.15	2168.56	3620.44	2214.58	3271.18	2241.46	2562.82	2239.61	2106.43	2726.35	2862.13	3926.71	1523.09	2629.98	2183.81	2449.75	3146.1	2536.17	3014.82	2122.82	2768.25
1470	3396.44	2200.22	2620.34	2997.83	3504.8	2334.65	2190.45	2089.47	2756.89	2956.92	3264.1	3097.8	3140.8	2933.82	2006.23	1894.2	2705.83	2234.66	2757.81	2091.63	2526.09	3667.01	2604.22	2000.88	2166.57	3547.44	2226.95	3259.9	2212.94	2583.66	2193.71	2089.77	2685.94	2817.87	3945.94	1538.63	2616.62	2150.45	2427.31	3138.1	2581.59	3016.5	2132.9	2763.74
1500	3424.89	2146.46	2624.52	3025.85	3488.47	2358.83	2209.37	2106.16	2762.43	2958.44	3265.02	3022.88	3094.68	2946.59	1986.59	1911.26	2729.25	2196.64	2824.34	2101.66	2522.64	3699.26	2626.02	1991.26	2185.62	3623.15	2211.84	3333.01	2264.58	2601.14	2273.97	2067.67	2672.21	2834.1	3950.76	1523.62	2643.83	2141.94	2440.7	3153.31	2558.72	2983.49	2136.85	2694.84
1530	3400.84	2184.45	2596.17	2997.93	3494.98	2389.02	2187.27	2095.18	2781.93	2974.05	3261.7	3075.85	3138.28	2932.64	1969.36	1930.79	2731.1	2238.89	2811.16	2079.06	2544.1	3714.8	2599.97	2008.72	2199.09	3609.06	2221.19	3250.18	2267.67	2575.74	2245.06	2089.18	2639.21	2853.42	3928.88	1522.34	2640.03	2194.38	2454.44	3178.43	2555.94	2991.7	2127.44	2714.22
1560	3391.02	2173.38	2632.2	3013.29	3474.32	2362.97	2181.54	2089.37	2831.1	2917.98	3265.79	3040.65	3132.21	2971.74	1997.92	1900.68	2719.61	2245.45	2771.05	2089.79	2521.53	3782.69	2630.07	1988.47	2207.93	3619.26	2201.5	3268.85	2258.24	2596.04	2229.64	2072.83	2647.92	2827.14	3930.45	1544.01	2646.42	2171.01	2425.39	3140.67	2569.55	3009.78	2142.98	2782.87
1590	3434.7	2197.32	2615.35	3006.9	3532.55	2350.24	2192.63	2104.82	2762.96	2930.29	3277.79	3061.95	3128.54	2965.02	1957.78	1890.26	2749.98	2187.88	2790.38	2078.24	2559.49	3709.09	2607.32	1984.53	2225.12	3615.48	2186.55	3250.53	2267.16	2551.88	2200.23	2058.03	2713.71	2860.42	3940.66	1558.26	2637.74	2203.46	2420.13	3159.78	2537.48	3012.15	2156.43	2746.36
1620	3429.26	2173.68	2600.69	3024.29	3521.91	2376.47	2230.41	2063.16	2768.79	2904.61	3275.26	3114.64	3075.18	2927.46	1981.24	1906.22	2695.61	2233.3	2760.51	2056.27	2581.52	3687.95	2650.99	2007.7	2203.57	3598.12	2222.65	3287.97	2270.72	2620.7	2260.16	2001.65	2698.73	2805.71	3969.76	1549.02	2652.4	2140.68	2393.09	3190.93	2585.7	3045.73	2107.38	2684.18
1650	3450.53	2174.54	2656.37	2979.53	3496.6	2357.46	2189.93	2073.27	2762.17	2905.63	3242.62	3095.27	3120.77	2956.89	2027.98	1908.32	2688.32	2229.49	2795.15	2120.64	2543.54	3703.84	2614.36	1970.61	2141.75	3585.95	2209.47	3245.65	2245.26	2589.66	2280.78	2064.13	2694.55	2875.06	3903.89	1552.82	2611.81	2143.46	2433.9	3174.67	2545.24	2940.99	2093.64	2708.59
1680	3457.77	2173.16	2620.34	2984.58	3527.93	2407.55	2275.11	2090.57	2760.61	2862.21	3305.25	3087.23	3121.88	2949.84	1995.23	1918.76	2787.06	2227.14	2828.5	2070.42	2554.8	3675.05	2600.66	2000.15	2226.57	3608.09	2222.56	3288.57	2226.72	2658.66	2169.86	2062.84	2674.52	2835.73	3902.92	1522.63	2651.72	2196.39	2436.98	3145.16	2564.1	2961.7	2096.36	2739.46
1710	3429.84	2175.95	2653.96	2996.88	3516.76	2344.91	2238.4	2084.38	2767.77	2930.77	3303.1	3075.04	3088.04	2967.67	2008.96	1907.06	2750.69	2252.02	2759.07	2073.95	2552.67	3649.14	2620.61	1982.38	2153.89	3593.07	2209.65	3255.74	2221.95	2555.29	2188.55	2084	2733.24	2880.86	3923.47	1509.92	2631.17	2161.66	2450.23	3147.69	2578.05	2988.79	2142.64	2715.89
1740	3394.08	2155.78	2638.52	2993.73	3534.87	2355.29	2243.57	2075.37	2756.54	2962.81	3235.72	3079.18	3178.68	2943.38	2024.81	1932.17	2739.73	2253.23	2814.43	2062.11	2564.45	3670.09	2679.29	1983.59	2194.96	3593.98	2203.43	3264.76	2302.61	2565.97	2172.66	2090.02	2696.46	2838.91	3939.68	1514.87	2652.16	2137.59	2415.96	3109.16	2519.16	2989.47	2085.38	2733.82
1770	3408.09	2166.16	2600.73	2954.98	3550.06	2339.75	2226.17	2058.22	2830.32	2922.69	3275.2	3137.42	3137.93	2945.84	2004.06	1920.52	2724.88	2225.45	2758.25	2136.89	2598.81	3705.03	2639.07	1993.58	2228.46	3630.51	2216.39	3265.81	2278.58	2566.97	2201.21	2113.11	2749.03	2812.54	3942.87	1527.78	2632.82	2176.49	2404.32	3153.04	2577.83	3006.69	2119.44	2734.72
1800	3440.75	2195.87	2646.7	2989.97	3538.93	2317.97	2240.71	2091.37	2806.74	2931.78	3248.9	3092.15	3131.6	2938.43	2023.27	1926.61	2769.16	2225.65	2807.64	2096.58	2505.64	3671.75	2661.54	1971.29	2177.11	3619.89	2192.85	3284.71	2263.73	2605.98	2195.27	2146.22	2683.45	2861.33	3975.2	1543.56	2646.33	2185.38	2415.5	3124.43	2609.48	3005.61	2156.05	2714.01
1830	3423.36	2144.14	2652.56	2988.84	3479.76	2364.17	2203.78	2052.58	2805.87	2952.02	3255.77	3099.83	3131.18	2944.19	2015.58	1911.95	2766.08	2193.83	2814.81	2113.14	2520.49	3663.42	2656.05	1980.41	2212.86	3657	2186.69	3289.24	2247.54	2599.3	2228.68	2142.67	2750.21	2900.81	3898.68	1532.44	2633.73	2149.74	2434.08	3199.2	2511.31	2999.65	2109.61	2668.64
1860	3435.77	2164.14	2643.25	2979.76	3494.05	2354.01	2237.43	2055.07	2758.48	2937.12	3257.32	3048.85	3114.86	2926.85	1995.62	1925.6	2776.35	2282.59	2814.75	2081.77	2534.7	3723.3	2597.68	2032.27	2133.12	3618.76	2196.47	3261.75	2274.26	2596.77	2230.94	2083.67	2765.86	2884.1	3892.76	1522.49	2657.01	2128.96	2439.89	3140.72	2499.28	2951.13	2139.55	2745.19
1890	3395.64	2155.74	2612.88	2986.68	3515.44	2354.98	2201.92	2094.95	2825.95	2927.21	3274.36	3059.32	3096.61	2976.38	1997.79	1927.76	2728.77	2254.19	2805.36	2055.58	2482.91	3714.91	2631.6	1971.54	2158.11	3644.68	2197.81	3318.41	2213.54	2565.14	2206.72	2064.43	2729.87	2790.88	3941.77	1515.69	2651.96	2136.62	2429.92	3128.96	2571.69	3040.7	2131.56	2669.61
1920	3413.32	2190.38	2638.69	3038.56	3510.67	2383.82	2183.9	2117.46	2773.64	2931.76	3279.14	3076.22	3134.73	2970.34	1986.51	1892.43	2753.81	2279.27	2790.57	2089.48	2499.05	3716.53	2599.47	2013.05	2175.12	3646.75	2236.16	3282.3	2207.19	2543.93	2210.81	2074.77	2690.38	2846.81	3932.18	1544.11	2641.62	2190.52	2453.83	3193.78	2571.28	3008.61	2123.97	2728.84
1950	3395.3	2208.94	2673.76	3024.93	3487.94	2357.11	2239.61	2046.12	2773.89	2918.75	3272.11	3080.02	3100.51	2945.72	2023.41	1921.41	2692.16	2204.2	2776.77	2108.78	2531.12	3678.08	2604.12	1989.67	2155.97	3595.08	2187.46	3302.99	2189.47	2585.95	2214.26	2102.75	2705.51	2825.08	3875.42	1531.9	2653.97	2161.74	2415.71	3126.03	2574.52	3010.92	2130.99	2661.96
1980	3401.38	2172.6	2672.5	3008.15	3510.02	2376.38	2162.04	2085.17	2776.87	2934.6	3260.63	3029.76	3140.66	2924.78	1962.69	1927.15	2753.88	2240.93	2811.23	2109.71	2501.89	3704	2631.95	2014.42	2232.99	3576.64	2181.93	3302.75	2270.88	2567.83	2210.73	2026.09	2653.02	2832.36	3914.98	1523.83	2630.33	2188.86	2421.71	3121.21	2573.3	2981.16	2158.47	2756.47
2010	3421.5	2190.07	2644.68	2929	3469.44	2372.17	2141.34	2085.96	2777.1	2886.63	3253.76	3047.85	3125.67	2942.34	2012.02	1887.83	2768.68	2257.78	2786.97	2104.96	2526.02	3713.94	2567.4	2033.64	2120.33	3640.55	2210.98	3322.97	2209.39	2548.55	2253.89	2109.98	2673	2807.75	3943.57	1527.59	2630.29	2148.14	2442.33	3188.89	2564.43	2919.7	2111.6	2724.53
2040	3462.42	2162.57	2633.61	2991.69	3536.83	2398.87	2180.74	2050.75	2807.67	2899.57	3283.43	3043.81	3105.23	2946.42	1993.13	1924.31	2724.77	2203.56	2833.38	2099.42	2586.12	3673.2	2593.4	1980.13	2194.55	3615.66	2239.52	3264.43	2244.96	2575.77	2216.3	2008.14	2615.19	2807.15	3933.52	1531.81	2613.11	2189.09	2435.44	3151.51	2612.21	2995.93	2162.45	2722.17
2070	3419.14	2144.97	2651.17	3004.25	3553.62	2378.84	2198.83	2092.19	2758.51	2967.34	3300.62	3079.6	3115.39	2950.17	2035.5	1934.15	2723.13	2249.52	2782.09	2074.02	2559.14	3675.32	2595.85	2026.06	2193.2	3621.53	2212.42	3284.19	2220.56	2604	2196.45	2042.64	2664.35	2811.95	3965.38	1556.38	2639.75	2161.51	2413.24	3187.43	2545.59	3003.22	2130.15	2713.7
2100	3416.51	2187.63	2617.73	2979.74	3479.57	2361.81	2161.2	2113.2	2785	2960.32	3252	3096.7	3108.77	2931.98	2022.22	1902.84	2742.41	2211.21	2821.85	2105.84	2594.19	3698.06	2589.79	1973.12	2183.18	3606.12	2201.86	3299.63	2239.55	2542.21	2224.75	2062.25	2661.12	2902.05	3924.57	1568.62	2641.25	2169.27	2441.52	3175.05	2549.39	3009.82	2094.24	2714.2
2130	3408.99	2183.3	2629.6	2977.52	3514.27	2361.46	2180.47	2054.17	2789.94	2910.79	3245.19	3100.11	3137.32	2933.38	2015.36	1871.23	2694.28	2252.09	2814.09	2083.28	2553.84	3694.45	2598	1982.52	2182.96	3580.86	2189.62	3210.46	2235.67	2569.78	2219.11	2083.95	2663.49	2785.16	3939.08	1512.86	2627.23	2166.64	2392.99	3173.12	2582.99	2994.17	2115.67	2683.53
2160	3402.87	2153.89	2629.2	2974.19	3535.01	2393.82	2170.77	2075.39	2785.96	2944.75	3237.27	3090.21	3092.12	2946.04	1975.84	1922.83	2732	2218.34	2838.16	2080.38	2521.29	3694.76	2614.96	1969.15	2218.02	3616.27	2210.04	3303.7	2262.63	2609.99	2201.13	2074.09	2730.43	2792.1	3957.08	1546.61	2640.57	2190.69	2435.06	3104.75	2572.94	2978.57	2134.23	2726.69
2190	3384.91	2172.16	2612.61	2976.9	3475.3	2347.35	2169.97	2094.54	2774.69	2912.92	3270.7	3101.08	3136.69	2940.43	2010.16	1928.46	2750.25	2189.52	2786.33	2095.03	2531.74	3698.76	2680.93	1969.39	2181.78	3595.27	2188.62	3274.08	2249.92	2569.41	2177.68	2103.02	2751.39	2864.77	3933.78	1530.63	2659.21	2190.98	2401.68	3133.74	2577.27	3031.73	2102.04	2741.06
2220	3388.07	2159.42	2627.22	3048.08	3519.73	2352.76	2161.67	2099.12	2761.89	2958.86	3297.73	3124.26	3156.5	2970.79	2018.88	1938.33	2714.8	2208.68	2787.55	2107.74	2481.75	3685.73	2589.69	1997.59	2179.21	3627.7	2203.68	3326.57	2309.19	2587.04	2191.06	2105.85	2737.95	2792.38	3952.16	1506.7	2663.44	2185.44	2462.56	3197.04	2561.32	2995.76	2119.6	2727.6
2250	3353.05	2163.28	2647.4	2955.22	3503.53	2385.59	2239.51	2082.27	2801.91	2887.05	3315.12	3113.28	3124.26	2940.12	2042.35	1895.62	2714.09	2188.27	2757.83	2118.89	2475	3685.2	2605.06	1996.64	2173.2	3610.34	2185.02	3242.7	2226.79	2590.35	2231.77	2079.67	2733.41	2858.51	3933.1	1543.94	2620.28	2176.26	2385.83	3167.22	2559.82	2940.22	2088.98	2722
2280	3365.99	2188.53	2638.83	2982.35	3507.29	2348.26	2200.26	2102.3	2810.82	2899.28	3272.17	3099.6	3134.92	2954.4	2042.31	1934.23	2739.76	2271.02	2753.3	2119.87	2558.01	3660.77	2649.18	1976.67	2161.01	3616.6	2212.16	3303.02	2249.65	2592.89	2207.36	2086.95	2746.05	2820.23	3961.42	1527.2	2640.21	2153.11	2427.79	3126.75	2580.16	3009.24	2142.93	2728.15
2310	3411.22	2193.42	2645	2948.42	3529.12	2360.8	2207.22	2067.47	2809.71	2937.16	3246.85	3150.28	3122.86	2949.64	2029.16	1908.29	2718.4	2219.63	2788.02	2151.83	2561.13	3671.36	2649.07	1982.83	2186.88	3626.68	2222.88	3246.52	2225.01	2571.5	2220.81	2096.24	2709.84	2858.92	3909.11	1532.33	2632.05	2167.32	2464.57	3129.63	2547.57	2982.88	2161.36	2744.5
2340	3392.26	2177.09	2649.97	2988.41	3494.55	2374.64	2224.71	2109.3	2807.55	2969.18	3267.88	3093.76	3087.89	2957.79	2021.65	1899.99	2729.22	2218.44	2800.82	2086.08	2479.93	3747.74	2598.29	1955.58	2184.17	3606.59	2176.26	3297.39	2123.6	2594.77	2246.04	2074.66	2749.32	2857.96	3940.95	1541.57	2610.48	2151.9	2445.3	3195.02	2578.48	2999.84	2133.78	2766.51
2370	3414.62	2176.19	2647.69	3024.12	3517.86	2329.87	2217.05	2067.18	2736.6	2962.66	3286.63	3067.25	3114.1	2937.6	2002.71	1892.42	2758.66	2244.89	2793.37	2122.2	2490.59	3723.11	2607.05	1968.13	2170.71	3608.95	2185.92	3313.1	2233.19	2559.02	2260.82	2070.48	2663.9	2839.33	3952.77	1512.62	2639.04	2137.55	2488.32	3141.14	2524.39	2984.12	2129.13	2722.32
2400	3381.58	2164.19	2620.76	2945.09	3518	2369.72	2246.08	2105.41	2765.9	2954.23	3274.18	3093.82	3144.8	2939.77	1987.2	1916.89	2745.34	2247.81	2807.41	2058.12	2544.99	3720.67	2641.11	1985.48	2176.28	3585.61	2185.03	3278.05	2193.08	2585.52	2243.47	2036.43	2662.02	2842.79	3956.33	1520.24	2641.68	2163.45	2389.18	3148.05	2570	2999.56	2130.39	2722.28
2430	3425.91	2183.75	2628.35	2945.93	3470.23	2324.54	2276.56	2059.2	2792.83	2936.33	3260.29	3061.98	3155.68	2930	1991.88	1936.02	2766.27	2250.02	2804.84	2097.57	2534.4	3681.48	2597.28	1967.16	2199.02	3618.71	2194.38	3240.84	2224.59	2552.19	2253.62	2096.38	2660.54	2843.13	3881.51	1536.57	2623.94	2170.28	2455.44	3176.43	2557.22	3039.5	2139.62	2739.89
2460	3394.76	2184.46	2629	2969.76	3498.78	2356.91	2236.81	2144.09	2765.42	2941.12	3280.08	3081.43	3129.21	2928.08	1943.5	1902.6	2729.29	2218.18	2778.78	2097.4	2507.54	3702.39	2621.94	1965.92	2169.44	3544.99	2224.21	3282.05	2239.85	2628.26	2249.91	1988.72	2659.18	2884.77	3923.86	1528.49	2623.22	2143.86	2461.34	3188.76	2532.37	3025.06	2119.26	2774.66
2490	3439.46	2158.66	2626.63	2969.08	3476.01	2381.77	2263.01	2082.35	2790.76	2931.58	3251.87	3069.25	3115.61	2914.82	1977.01	1925.85	2722.87	2206.57	2777.09	2088.08	2568.59	3705.84	2615.11	1968.59	2221.55	3612.43	2249.15	3334.62	2205.84	2576.62	2249.7	2061.52	2707.33	2817.53	3961.48	1534.45	2665.48	2155.51	2434.88	3112.04	2587.72	2981.79	2081.8	2691.43
2520	3449.89	2140.64	2673.36	3018.32	3519.78	2360.99	2210.31	2061.74	2758.88	2939.15	3263.75	3061.59	3182.2	2924.69	2016.84	1950.8	2750.11	2216.73	2799.1	2118.56	2553.8	3662.72	2568.92	2020.36	2204.39	3604.57	2237.1	3288.78	2247.06	2557.13	2219.74	2044.97	2682.47	2789.82	3917.09	1503.08	2641.91	2147.73	2432.71	3202.07	2510.88	2942.52	2115.53	2686.06
2550	3399.36	2202.7	2628.77	3002.73	3512.28	2346.39	2233.36	2084.76	2785.25	2917.94	3229.19	3091.11	3139.06	2939.31	1991.04	1917.55	2710.28	2242.91	2831.98	2073.51	2581.44	3705.4	2633.75	1967.07	2201.87	3592.86	2221.78	3245.3	2251.36	2582.53	2248.51	2045.4	2692.2	2905.31	3960.25	1523.78	2635.14	2193.76	2461.1	3170.39	2521.27	2957.67	2133.33	2765.17
2580	3389.95	2198.44	2632.89	2986	3517.54	2331.37	2195.7	2103.97	2771.49	2936.83	3260.89	3091	3109.21	2935.11	2011.08	1925.26	2718.49	2243.33	2790.42	2088.61	2530.33	3638.51	2623.22	2004.96	2203.8	3594.68	2188	3300.46	2283.88	2550	2212.88	2051.12	2722.69	2853.99	3900.57	1530.04	2669.66	2137.01	2443.14	3203.14	2561	2983.16	2113.47	2732.21
2610	3432.15	2168.84	2612.86	3020.76	3499.94	2390.52	2176.52	2091.52	2785.41	2956.87	3238.48	3039.51	3094.78	2955.33	1979.14	1888.79	2724.19	2220.55	2817.08	2061.89	2514.78	3691.2	2649.56	2022.1	2233.32	3592.89	2226.18	3292.08	2226.34	2601.22	2259.37	2074.79	2679.81	2833.81	3939.36	1516.5	2668.95	2182.61	2375.46	3156.16	2565.38	3002.76	2123.52	2706.04
2640	3392.44	2186.72	2622.46	2972.3	3477.97	2361	2163.37	2072.84	2803.76	2924.34	3260.09	3071.56	3111.15	2954.25	1989.67	1931.62	2763.78	2197.47	2799.92	2080.62	2528.42	3667.51	2598.95	1994.23	2188.96	3601.22	2222.42	3223.89	2249.94	2588.49	2208.34	2049.74	2722.8	2901.27	3930.09	1542.24	2631.62	2154.63	2458.38	3193.78	2576.65	2996.24	2150.75	2668.05
2670	3433.37	2161.9	2681.62	2942.4	3489.99	2364.39	2189.28	2086.53	2800.76	2961.31	3254.74	3087.63	3124.36	2939.82	2014.34	1958.16	2727.31	2264.8	2808.05	2106.04	2556.72	3689.96	2596.37	2002.64	2230.69	3627.07	2192.47	3266.09	2225.77	2597.33	2240.2	2066.96	2742.86	2826.06	3920.23	1544.78	2653.93	2198.4	2391.37	3177.29	2552.88	2956.36	2135.85	2703.74
2700	3407.37	2138.22	2603.83	2973.42	3514.98	2362.2	2151.3	2106.92	2767.69	2910.8	3257.9	3030.7	3116.59	2949.11	1992.32	1961.49	2732.75	2207.09	2798.63	2101.03	2562.93	3649.4	2579.06	1955.64	2193.13	3640.39	2214.11	3292	2245.26	2556.55	2251.34	2104.06	2772.27	2794.09	3928.65	1521.32	2676.65	2122.82	2382.51	3175.67	2602.93	2974.65	2099.38	2752.48
2730	3393.28	2220.38	2599.6	2983.77	3539.36	2357.01	2204.43	2099.17	2804.76	2923.06	3278.53	3109.72	3101.6	2978.88	1982.2	1981.84	2713.78	2220.43	2786.89	2063.61	2508.18	3682.6	2609.03	2015.78	2168.93	3658.61	2216.13	3275.47	2233.34	2585.08	2250	2107.63	2779.33	2852.01	3968.56	1528.62	2657.68	2174.69	2387.12	3142.55	2574.14	3025.92	2144.22	2729.77
2760	3443.54	2164.7	2635.61	2966.42	3481.3	2330.62	2230.44	2066.78	2797.14	2943.72	3289.54	3097.13	3128.1	2948.92	1986.19	1875.33	2685.56	2229.8	2775.2	2099.45	2531.15	3642.06	2595.83	1975.98	2178.45	3636.41	2188.42	3229.61	2264.68	2582.99	2207.32	2076.62	2708.15	2870.53	3945.18	1538.35	2667.56	2167.84	2448.84	3214.85	2505.89	2989.11	2181.48	2743.95
2790	3373.06	2175.77	2629.99	2952.71	3483.19	2376.61	2171.21	2083.65	2807.52	2934.16	3271.79	3102.45	3074.29	2932.58	2022.53	1910.18	2685.63	2221.11	2803.35	2088.44	2516.93	3703.78	2645.49	2007.33	2203.53	3616.23	2192.1	3259.83	2234.67	2575.6	2228.91	2091.24	2714.95	2797.09	3895.24	1509.88	2642.5	2155.16	2478.09	3164.67	2534.57	3016.69	2143.6	2690.91
2820	3435.29	2170.65	2606.86	2973.52	3482.52	2380.77	2232.81	2075.07	2801.23	2966.08	3307.58	3057.57	3131.87	2941.9	1983.34	1880.84	2729.65	2232.31	2739.11	2086.06	2538.62	3680.58	2593.99	1999.94	2221.63	3613.88	2206.28	3246.85	2257.86	2579.87	2210.91	2085.1	2717.38	2870.95	3917.18	1536.21	2675.45	2174.41	2420.83	3139.33	2544.22	2979.21	2111.89	2726.96
2850	3407.85	2178.19	2658.52	2953.03	3527.61	2369.22	2223.1	2112.91	2775.85	2940.28	3248.81	3105.94	3130.91	2938.98	2004.34	1924.46	2720.22	2241.05	2787.3	2098.89	2505.47	3706.41	2583.21	2003.04	2182.2	3644.4	2197.4	3308.61	2255.66	2569.66	2239.83	2089.87	2674.99	2898.26	3893.34	1528.79	2631.79	2192.23	2419.24	3131.53	2582.84	3022.22	2128.43	2695.49
2880	3443.09	2176.17	2592.14	3018.6	3495.1	2346.97	2232.49	2113.38	2748.75	2946.38	3259.88	3025.5	3121.35	2949.66	1998.82	1936	2747.76	2209.53	2815.52	2103.55	2566.63	3668.39	2650.46	1997.08	2149.29	3611.84	2207.42	3302.79	2232.08	2563.32	2184.07	2066.48	2654.56	2826.33	3920.8	1519.15	2627.57	2186.21	2431.09	3222.21	2545.25	3030.38	2119.05	2747.81
2910	3404.21	2150.98	2651.31	2950.56	3515.28	2327.05	2266.9	2082.87	2783.35	2970.94	3309.52	3075.49	3121.69	2933.44	2021.9	1913.44	2708.13	2234.5	2793.41	2088.69	2560.97	3664.61	2575.36	2015.14	2170.45	3607.74	2210.45	3271.71	2248.08	2571.66	2218.23	2086.85	2660.26	2821.19	3966.16	1528.31	2626.54	2206.7	2440.28	3151.28	2561.96	3006.51	2117.57	2741.78
2940	3422.52	2197.04	2594.17	2986.76	3483.55	2360.25	2264.28	2066.65	2777.54	2955.34	3238.59	3091.67	3151.05	2931.11	1966.3	1877.1	2708.86	2228.51	2767.04	2072.25	2540.66	3714.78	2601.32	2039.26	2214.19	3587.38	2180.31	3338.72	2226.84	2551.84	2188	2085.02	2681.97	2916.35	3920.43	1518.45	2620.83	2183.39	2431.76	3196.24	2521.44	2985.81	2109.57	2713.26
2970	3362.48	2173.47	2620.73	2976.55	3514.81	2377.81	2222.01	2090.7	2767.15	2915.67	3232.63	3085.69	3124.85	2936.96	1985.67	1921.94	2729.36	2254.85	2799.11	2082.42	2551.36	3672.26	2614.59	2000.25	2173.03	3623.47	2212.08	3238.27	2242.76	2540.64	2230.7	2049.78	2643.64	2853.39	3895.09	1524.12	2618.89	2161.55	2425.42	3159.29	2536.93	3022.33	2114.86	2760.67
3000	3437.2	2182.32	2628.84	2974.58	3486.81	2381.41	2203.2	2082.02	2783.41	2928.88	3248.13	3045	3124.52	2933.32	1990.26	1909.86	2758.99	2208.34	2809.36	2083.34	2572.77	3706.76	2588.83	2020.72	2184.2	3613.67	2207.16	3281.67	2233.84	2569.49	2210.24	2026.92	2696.93	2866.78	3964.92	1541.85	2626.03	2179.02	2488.62	3166.02	2558.15	2988.65	2095.68	2758.64
3030	3416.78	2182.84	2655.97	2993.7	3495.84	2360.67	2246.89	2087.8	2775.09	2912.71	3317.91	3050.46	3074.04	2983.73	2012.84	1883.44	2730.07	2225.74	2814.81	2125.53	2527.99	3726.66	2621.59	2008.09	2212.23	3590.99	2197.3	3256.71	2260.97	2576.93	2185.58	2051.62	2674.26	2889.09	3927.44	1531.61	2657.01	2180.13	2380.41	3172.15	2596.85	2949.41	2113.53	2754.23
3060	3387.61	2177.75	2630.69	2971.12	3503.17	2397.24	2208.56	2071.24	2793.93	2957.36	3273.6	3037.4	3143	2949.12	2000.68	1905.87	2742.39	2250.42	2788.1	2068.37	2566.62	3689.76	2651.77	1999.49	2176.45	3641.49	2193.06	3227.15	2192.44	2574.66	2288.92	2062.69	2684.1	2899.73	3927.34	1544.29	2612.61	2180.13	2473.11	3164.22	2539.66	2979.44	2101.5	2684.07
3090	3391.93	2159.3	2627.44	2992.07	3529	2391.23	2228.58	2117.24	2788.42	2946.12	3248.59	3032.63	3176.81	2930.2	1987.52	1931.04	2713.33	2194.04	2807.67	2088.94	2528.73	3667.93	2613.36	1992.54	2193.89	3611.27	2208.6	3241.73	2267.44	2580.33	2196.44	2066.48	2695.14	2798.46	3919.75	1532.93	2650.7	2118.68	2383.03	3232.3	2578.83	2988.72	2156.32	2666.69
3120	3444.69	2161.58	2654.44	2976.3	3491.88	2392.96	2157.66	2094.18	2803.17	2896.57	3227.62	3028.75	3093.06	2925.5	1997.78	1896.53	2728.56	2196.85	2833.31	2148.81	2501.06	3665.97	2597.39	1959.8	2232.11	3606.78	2232.83	3295.96	2231.88	2597.86	2203.9	2070.5	2777.47	2787.87	3911.34	1521.16	2655.93	2181.14	2401.23	3126.99	2601.42	3019.38	2164.37	2750.42
3150	3403.59	2193.76	2622.05	3023.18	3513.17	2403.39	2180.42	2069.98	2789.7	2939.63	3261.36	3090.07	3146.72	2952.5	2021.16	1908.08	2750.98	2248.93	2790.93	2129.05	2571.94	3619.93	2575.72	1971.58	2153.75	3624.27	2243.78	3223.47	2240.35	2605.07	2222.73	2073.47	2759.47	2825.54	3917.95	1536.31	2665.25	2189.72	2409.77	3123.68	2549.14	2992.5	2128.26	2718.69
3180	3433.01	2191.96	2650.03	2999.93	3501.78	2374.3	2166.52	2073.02	2820.56	2916.53	3229.87	3071.18	3063.73	2958.48	2016.66	1904.43	2691.45	2228.21	2809.87	2032.25	2528.24	3675.67	2603.88	1982.43	2209.99	3631.38	2202.26	3234.93	2245.12	2568.74	2237.85	2066.76	2766.06	2896.59	3954.82	1516.4	2632.19	2152.34	2448.26	3138.08	2577	2990.08	2135.2	2734.06
3210	3447.21	2153.51	2635.17	2985.63	3482.63	2388.63	2175.73	2056.52	2789.73	2984.69	3309.92	3062.01	3084.64	2933.36	1988.46	1905.45	2702.71	2218.56	2803.36	2123.67	2543.26	3669.44	2637.47	2009.04	2160.79	3657.64	2211.03	3272.27	2222.08	2567.3	2206.41	2106.25	2699.37	2839.3	3954.8	1535.36	2651.7	2170.44	2446.26	3156.84	2571.92	2964.1	2098.1	2757.25
3240	3409.53	2168.45	2641.93	2939.02	3554.85	2380	2204.45	2078.44	2772.52	2918.41	3242.7	3032.86	3110.11	2954.85	1997.99	1916.88	2705.85	2232.45	2749.38	2062.83	2556.65	3685.4	2598.12	1979.81	2157.08	3620.97	2192.83	3281.94	2227.47	2584.92	2238.58	2034.67	2724.21	2830.5	3899.07	1509.01	2632.79	2161.29	2441.37	3186.39	2561.27	2957.71	2078.55	2705.87
3270	3406.62	2164.99	2643.49	3009.88	3514.42	2393.69	2177.89	2077.9	2793.19	2910.03	3286.47	3062.82	3139.16	2938.53	2018.8	1895.83	2745.9	2198.84	2747.95	2086.93	2534.45	3681.17	2605.49	2014.05	2182.61	3614.91	2172.73	3242.26	2245.06	2583.61	2209.28	2047.74	2674.14	2854.34	3945.7	1527.92	2650.56	2169.46	2421.74	3162.84	2560.22	2974.1	2150.77	2725.65
3300	3367.76	2186.56	2622.26	3003.25	3503.34	2386.88	2182.07	2068.46	2761.31	2983.67	3284.55	3031.49	3069.22	2967.14	2002.29	1871.24	2740.16	2228.5	2779.84	2064.56	2508.27	3708.43	2643.79	1982.04	2163.38	3611.33	2215.64	3285.81	2180.77	2563.64	2277.71	2072.15	2648.44	2861.44	3952.33	1536.16	2591.05	2174.95	2471.4	3113.74	2589.72	2996.44	2103.31	2673.42
3330	3424.24	2168.5	2629.61	3017.42	3515.36	2390.5	2230.93	2070.42	2782.39	2925.96	3238.92	3075.64	3123.77	2925.94	1983.23	1890.88	2757.9	2235.74	2764.73	2139.8	2554.12	3676.25	2598.89	1969.92	2187.77	3664.8	2195.82	3281.54	2235.43	2562.61	2201.03	2036.04	2672.15	2873.57	3944.06	1540.81	2608.92	2187.37	2403.86	3177.77	2544.85	3020.06	2092.46	2654.21
3360	3432.24	2183.22	2645.47	2971.61	3489.8	2398.67	2167.37	2100.87	2790.78	2962.13	3285.74	3066.56	3074.78	2968.08	2018.76	1918	2717.64	2203.55	2777.47	2101.08	2519.01	3721.15	2593.57	2006.79	2185.9	3631.45	2213.13	3290.93	2224.3	2585.82	2275.4	2052.22	2644.18	2863.06	3922.66	1529.78	2654.2	2152.19	2465.51	3172.7	2568.52	2998.72	2139.65	2710.31
3390	3364.3	2183.79	2627.56	2978.41	3541.32	2351.49	2237.93	2126.1	2751.43	2932.65	3265.07	3025.17	3140.9	2965.45	2013.37	1930.68	2728.47	2227.87	2796.44	2093.14	2558.78	3665.54	2660.32	2002.98	2225.98	3606.67	2191.99	3342.78	2229.08	2570.2	2252.05	2054.66	2685.1	2835.4	3977.39	1527.61	2633.39	2161.48	2457	3177.45	2574.32	3007.33	2093.37	2746.4
3420	3400.26	2156.05	2603.1	2987.75	3473.07	2366.51	2217.58	2085.89	2759.71	2920.01	3293.76	3082.45	3125.67	2949.61	2040.8	1902.03	2737.95	2205.77	2805.69	2086.24	2580.47	3717.51	2603.64	2011.94	2155.14	3627.51	2197.34	3279.69	2293.06	2581.02	2181.49	2115.27	2661.76	2909.47	3938.8	1550.65	2578.94	2117.69	2510.22	3219.68	2566.93	3057.35	2127.71	2722.8
3450	3366.58	2193.17	2595.34	3010.32	3471.66	2337.43	2162.81	2077.02	2789.56	2908.59	3273.25	3069.25	3137.28	2943.9	2011.45	1940.36	2698.37	2209.32	2808.01	2096.27	2557.2	3687.61	2626.59	2007.23	2152.75	3633.5	2196.87	3238.22	2243.84	2564.99	2227.18	2047.03	2715.64	2815.29	3942.48	1548.4	2592.06	2200.53	2416.83	3124.93	2536.28	3013.91	2128.93	2700.99
3480	3375.22	2168.11	2644.43	3001.53	3522.25	2364.94	2240.41	2124.27	2784.8	2931.57	3239.13	3086.36	3148.52	2927.54	1984.56	1918.57	2750.91	2205.92	2808.39	2079.1	2532.73	3712.99	2609.75	2013.17	2176.66	3602.99	2201.68	3226.43	2250.16	2614.97	2299.01	2094.7	2671.33	2810.12	3935.04	1562.8	2536.55	2182.83	2418.69	3200.52	2540.29	2963.18	2101.79	2744.8
3510	3420.74	2169.61	2630.06	2975.77	3530.34	2386.56	2230.79	2092.3	2768.52	2947.98	3260.95	3103.98	3111.64	2943.55	2003.96	1922.49	2724.25	2261.06	2788.52	2120.64	2584.89	3664.87	2658.24	1987.05	2222.97	3605.96	2199.31	3295.32	2207.36	2550.58	2191.26	2066.47	2703.49	2881.03	3942.19	1530.66	2620.65	2163.48	2480.55	3215.72	2573.94	3008.52	2121.2	2718.36
3540	3387.97	2179.8	2666.34	3001.42	3520.31	2356.94	2232.17	2104.37	2780.77	2935.87	3246.94	3079.03	3138.4	2927.98	2015.44	1909.34	2766.27	2249.52	2768.98	2072.91	2541.07	3597.07	2632.57	1991.57	2197.9	3618.43	2198.12	3281.05	2215.38	2551.16	2217.67	2045.86	2657.02	2841.38	3910.03	1515.5	2545.4	2162.99	2387.5	3134.67	2554.58	2973.61	2112.06	2751.06
3570	3411.4	2179.6	2651.91	2994.62	3471.03	2390.94	2191.42	2095.02	2757.59	2899.02	3260.6	3079.12	3146.7	2917.39	1990.38	1897.36	2747.14	2226.04	2779.4	2051.37	2509.62	3706.37	2620.56	1970.15	2193.97	3610.44	2190.94	3259.27	2208.51	2615.09	2249.66	2015.4	2692.16	2840.46	3913.58	1495.68	2664.23	2166.28	2420.44	3153.68	2519.71	2993.86	2135.7	2739.34
3600	3395.68	2167.14	2624.74	2973.81	3498.02	2389.57	2247.98	2094.16	2779.84	2938.34	3257.52	3063.7	3111	2945.28	2017.85	1915.9	2688.78	2269.63	2793.04	2104.13	2503.51	3672.48	2608.73	2013.07	2240.05	3616.81	2221.15	3306.55	2214.69	2577.69	2174.89	2086.03	2720.97	2852.47	3890.48	1539.11	2645.56	2208.9	2410.74	3158.55	2584.24	3026.64	2127.09	2718.1
3630	3382.54	2148.16	2645.1	2987.27	3483.69	2327.18	2232.14	2068.09	2793.93	2991.51	3241.87	3039.81	3105.13	2953.68	1981.18	1933.61	2775.33	2276.22	2832.8	2105.01	2562.71	3727.78	2651.37	1990.56	2212.34	3630.58	2222.86	3277.96	2220.1	2567.22	2168.59	2098.51	2763.51	2859.66	3964.89	1556.64	2656.23	2153.53	2442.58	3146.03	2543.47	3042.15	2110.7	2673.74
3660	3377.03	2164.11	2646.39	2982.46	3506.11	2365.04	2159.72	2103.08	2780.56	2922.8	3268.84	3041.49	3068.51	2982.73	1979.03	1919.64	2771.23	2230.52	2780.62	2034.4	2523.33	3674.83	2560.89	1970.64	2194.18	3620.17	2224.98	3240.86	2210.83	2575.47	2221.94	2050.68	2718.51	2811.2	3905.5	1539.73	2600.92	2195.03	2388.8	3149.63	2554.07	3033.95	2146.13	2738.88
3690	3456.66	2162.7	2619.23	2964.59	3489.37	2364.19	2249.25	2136.41	2789.92	2939.78	3266.72	3098.53	3076.33	2910.61	1987.99	1902.83	2698.58	2210.62	2798.92	2078.82	2524.18	3702.42	2605.25	2006.62	2208.44	3588.58	2188.72	3269.4	2202.5	2589.57	2222.28	2047.09	2762.91	2805.11	3904.94	1529.42	2635.39	2219.36	2416.56	3115.54	2509.29	3021.17	2119.71	2699.61
3720	3389.07	2182.61	2658.73	3000.55	3470.04	2425.08	2223.51	2129.67	2776.85	2923	3272.73	3100.94	3103.48	2957.88	2029.53	1911.3	2730.5	2230.17	2780.11	2085.79	2560.73	3704.33	2597.86	2015.34	2175.12	3628.67	2180.49	3251.1	2278.22	2585.41	2165.67	2079.28	2689.09	2812.44	3922.77	1547.03	2663.97	2210.38	2445.25	3144.25	2546.12	2989.02	2174.59	2726.08
3750	3371.67	2183.2	2617.79	2997.61	3502.88	2375.04	2198.84	2102.73	2787.74	2935.61	3260.64	3051.87	3131.07	2932.14	2005.3	1911.9	2757.14	2205.24	2830.88	2116.97	2546.99	3682.33	2645.87	1980.5	2181.8	3608.14	2189.24	3267.09	2244	2590.24	2191.06	2078.09	2646.75	2885.97	3902.98	1532.42	2630.7	2189.22	2420.35	3157.67	2563.47	3026.46	2129.75	2695.58
3780	3436.46	2142.48	2656.35	3023.84	3539.4	2390.14	2188.09	2130.63	2816.29	2920.19	3231.84	3038.28	3156.25	2933.81	2025.17	1899.97	2721.21	2227.63	2796.01	2066.61	2521.53	3697.48	2605.66	1987.4	2195.29	3642.11	2194.48	3203.65	2286.33	2619.39	2232.13	2044.16	2631.12	2849.05	3922.48	1559.48	2634.24	2150.5	2454.01	3183.89	2563.02	2967.05	2157.14	2704.05
3810	3426.66	2171.17	2611.21	3024.35	3512.1	2351.69	2207.11	2080.94	2763.08	2927.18	3248.51	3084.19	3114.42	2945.82	2017.64	1944.62	2775.8	2211.81	2787.71	2067.58	2501.35	3749.24	2612.78	1986.09	2217.72	3675.43	2191.6	3308.31	2223.39	2606.81	2224.09	2104.86	2612.71	2859.57	3943.78	1539.58	2653.05	2153.13	2475.37	3130.61	2573.11	3044.11	2110.91	2723.32
3840	3390.38	2182.39	2620.11	2978.04	3437.69	2378.6	2205.74	2092.67	2789.36	2945.01	3252.8	3050.67	3109.68	2910.33	2004	1921.37	2754.71	2227.51	2830.93	2108.72	2554.34	3687.14	2588.17	1996.78	2214.23	3608.38	2202.24	3242.66	2268.39	2575.82	2191.68	2086.94	2638.48	2840.57	3955.83	1522.9	2645.73	2156.41	2478.56	3161.59	2535.17	3047.9	2161.69	2658.35
3870	3406.74	2172.02	2616.59	2962.45	3521.88	2339.22	2187.06	2077.13	2793	2941.35	3240.62	3036.86	3130.33	2938.54	1990.08	1909.48	2724.22	2208.73	2782.81	2078.37	2513.31	3690.43	2605.85	2043.44	2168.65	3629.69	2191.01	3287.55	2257.91	2558.96	2238.87	2062.05	2634	2774.1	3885.69	1523.85	2651.68	2136.69	2449.22	3173.92	2581.1	3015.51	2133.1	2720.1
3900	3426.29	2171.67	2628.47	2954.95	3514.13	2359.94	2186.96	2094.26	2784.67	2933.78	3271.24	3079.79	3128.72	2952.99	2015.38	1913.7	2784.74	2207.96	2799.91	2046.72	2533.38	3689.51	2618.54	1984.88	2160.17	3615.79	2215.18	3284.74	2242.85	2583.81	2219.89	2033.97	2647.67	2882.98	3930.93	1536.2	2655.38	2184.82	2420.15	3136.39	2582.87	3021.08	2130.35	2777.71
3930	3435.59	2177.32	2625.29	2964.7	3548.58	2366.38	2203.16	2089.19	2789.32	2932.66	3277.18	3025.6	3145.52	2942.48	1991.3	1903.25	2736.89	2219.32	2810.34	2077.3	2560.29	3709.09	2563.66	2032.26	2214.41	3615.23	2171.93	3314.91	2209.67	2598.96	2236.45	2061.32	2676.76	2853.18	3941.17	1533.57	2634.63	2114.41	2443.83	3170.43	2533.65	3025.4	2146.75	2726.17
3960	3380.23	2176.76	2625.57	3075.62	3499.8	2366.5	2205.16	2079.62	2779.57	2961.83	3245.42	3066.82	3126.68	2937.96	2041.26	1932.16	2714.41	2289.28	2820.74	2110.78	2551.68	3709.26	2561.35	1962.3	2184.19	3607.5	2209.18	3256.44	2204.99	2561.74	2234.94	2085.72	2705.21	2793.9	3935.4	1509.81	2624.64	2155.75	2413.44	3127.66	2555.55	2950.61	2103.51	2727.26
3990	3366.43	2205.13	2603.54	3007.57	3529.62	2356.62	2185.81	2105.77	2770.55	2927.39	3242.5	3042.52	3095.93	2957.74	2041.96	1952.88	2644.34	2247.9	2776	2076.49	2484.3	3649.45	2631.32	1997.08	2153.34	3597.29	2219.07	3247.92	2232.37	2571.77	2184.87	2098.18	2687.62	2797.45	3918.59	1534.9	2594.2	2167.81	2453.55	3207.38	2505.13	2960.17	2137.2	2752.44
4020	3395.05	2156.35	2639.39	2987.32	3529.21	2386.42	2200.51	2115.59	2789.77	2922.41	3242.76	3054.85	3091.64	2960.93	1963.37	1897.57	2728.79	2243.18	2806.29	2128.88	2544.65	3665.87	2633.3	2005.26	2186.24	3602.78	2215.48	3263.88	2247.11	2558.22	2200.17	2057.1	2683.39	2871.21	3933.34	1514.42	2618.71	2179.89	2487.57	3145.61	2578.66	3042.48	2153.49	2702.34
4050	3421.79	2171.68	2619.57	3009.34	3501.24	2359.03	2208.49	2094.29	2776.98	2925.11	3270.79	3105.6	3149.99	2953.88	1962.42	1932.31	2643.77	2249.05	2825.18	2078.32	2547.47	3698.32	2650.95	1996.97	2224.16	3585.89	2221.96	3322.53	2251.39	2561.41	2236.21	2100.52	2704.77	2759.07	3927.76	1550.63	2644.85	2130.62	2432.95	3179.47	2531.58	2971.45	2147.33	2724.57
4080	3383.22	2199.34	2612.59	2994.61	3524.29	2330.18	2196.74	2124.33	2797.05	2994.56	3254.84	3083.51	3102.69	2948.29	2014.64	1936.06	2725.54	2261.1	2766.56	2074.67	2559.9	3639.79	2585.25	2002.62	2184.22	3600.15	2211.33	3301.22	2231.32	2616.78	2209.58	2092.61	2739.78	2811.08	3920.93	1544.23	2592.2	2158.84	2422.02	3163.62	2555.78	2982.31	2080.15	2734.95
4110	3416.59	2161.36	2614.9	2996.1	3515.51	2345.22	2221.26	2076.58	2789.13	2894.57	3286.25	3088.06	3111.95	2946.23	2002.38	1915.56	2698.16	2218.33	2802.73	2106.13	2513.97	3675.44	2560.9	1959.91	2114.94	3642.94	2203.02	3231.41	2196.04	2569.12	2196.71	2089.53	2708.47	2769.75	3902.41	1543.43	2621.55	2159.43	2399.53	3120.92	2571.42	3008.74	2117.83	2727.43
4140	3373.03	2199.74	2602.23	3042.75	3537.97	2386.38	2228.81	2089.21	2773.46	2963.9	3285.14	3079.85	3097.22	2962.46	1958.63	1935.69	2752.59	2274.32	2797.49	2064.22	2530.97	3719.75	2609.27	1981.53	2182.31	3613.64	2207.68	3307.32	2224.19	2556.1	2213.88	2049.35	2754.52	2829.5	3895.11	1555.29	2635.51	2232.72	2437.67	3151.37	2545.71	3005.96	2144.39	2755.45
4170	3427.27	2198.04	2622.26	2974.2	3501.01	2426.14	2273.99	2070.85	2778.6	2956.46	3225.5	3042.25	3140	2936.34	1970.53	1905.65	2707.52	2222.86	2781.89	2080.05	2534.16	3697.92	2643.47	1955.46	2218.2	3609.44	2203.44	3249.27	2228.51	2556.7	2216.08	2074.07	2632.3	2885.12	3907.25	1522.88	2628.65	2165.08	2397.59	3171.75	2538.46	2992.86	2120.79	2812.25
4200	3391.11	2149.7	2641.46	3020.86	3491.82	2358.77	2217.3	2052.61	2775.01	2924.07	3288.21	3065.79	3074.11	2960.96	2018.09	1953.78	2742.1	2228.65	2781.7	2096.32	2530.93	3738.1	2610.29	2006.22	2199.67	3594.19	2229.7	3265.76	2170.09	2568.3	2224.64	2086.65	2655.51	2795.61	3930.23	1519.53	2643.25	2200.73	2427.55	3155.63	2519.42	3012.39	2150.33	2732.48
4230	3383.08	2168.82	2661.39	3023.44	3522.28	2367.49	2168.47	2086.86	2809.52	2919.97	3222.47	3087.11	3095.73	2958.77	2063.25	1884.47	2737.9	2188.78	2798.15	2090.2	2542.62	3694.17	2618.62	2008.59	2181.47	3606.74	2179.13	3249.97	2191.45	2553.14	2189.24	2040.62	2624.9	2836.43	3931.38	1538.92	2639.03	2113.45	2411.2	3234.24	2562.92	2999.82	2132.55	2731.62
4260	3376.25	2189.94	2652.43	2998.6	3461.8	2364.49	2273.61	2083.12	2768.59	2982.29	3281.99	3021.5	3099.78	2919.08	1997.47	1925.77	2761.71	2248.95	2810.22	2063.08	2539.43	3718.78	2656.17	1973.55	2204.07	3579.84	2214.73	3250.04	2215.11	2618.14	2269.81	2103.91	2677.98	2865.84	3877.19	1534.62	2644.85	2190.41	2392.36	3174.59	2582.76	2988.53	2086.63	2690.56
4290	3443.99	2177.56	2639.51	2979.28	3490.21	2357.57	2214.78	2072.09	2779.93	2921.76	3262.41	3078.51	3119.95	2966.61	2008.68	1886.64	2677.66	2216.97	2805.95	2064.44	2587.3	3718.62	2660.35	2010.13	2177.91	3649.95	2212.35	3226.8	2208.99	2597.14	2250.12	2039.64	2686.15	2881.31	3855.47	1544.03	2660.2	2151.33	2455.96	3161.74	2615.54	3019.81	2087.22	2731.44
4320	3416.35	2180.87	2648.09	2987.3	3523.17	2364.75	2240.46	2064.03	2824.9	2955.94	3213.45	3072.74	3113.09	2903.24	2017.31	1924.96	2711.81	2222.34	2797.58	2096.84	2557.86	3680.72	2635.77	1975.07	2169.83	3590.65	2169.91	3309.73	2201.92	2563.46	2229	2038.48	2636.75	2861.12	3933.95	1544.4	2696.26	2163.8	2394.87	3154.17	2539.2	2969.93	2150.29	2740.04
4350	3437.57	2188.44	2618.01	3032.98	3511.3	2412.53	2218.44	2082.36	2744.97	2918.58	3286.57	3043.09	3077.85	2951.16	2006.01	1913.19	2739.12	2233.48	2799.65	2103.49	2541.43	3681.5	2621.65	2003.76	2163.1	3588.56	2180.22	3314.03	2250.04	2613.6	2201.35	2054.03	2690.85	2812.42	3914.4	1545.5	2664	2197.2	2471.68	3133.84	2481.35	2962.17	2131.84	2703.4
4380	3396.55	2136.16	2638.66	3001.01	3515.66	2359.32	2228.63	2061.88	2801.66	2963.47	3285.93	3103.56	3132.01	2944.09	2001.19	1901.3	2694.61	2252.85	2818.26	2098.22	2552.04	3680.67	2596.23	2004.4	2201.89	3613.73	2193.87	3269.22	2278.9	2604.13	2247.39	2050.16	2678.2	2876.72	3943.7	1536.83	2635.66	2206.13	2460.94	3145.93	2563.7	2961.69	2108.72	2731.09
4410	3356.97	2195.49	2661.99	2991.1	3493.18	2375.5	2233.24	2079.8	2768.67	2927.04	3291.98	3123.39	3124.58	2897.73	1991.29	1940.27	2776.94	2226.09	2762.09	2076.11	2543.44	3705.32	2588.91	1969.87	2201.69	3619.98	2174.25	3272.64	2241.88	2582.4	2235.69	2084.04	2697.91	2922.04	3900.14	1553.35	2649.37	2161.46	2483.36	3155	2608.07	3006.84	2095.03	2719.77
4440	3429.56	2162.82	2666.99	3003.3	3536.46	2310.71	2179.26	2129.67	2768.26	2978.62	3279.94	3100.15	3125.09	2942.13	2011.34	1882.52	2739.02	2191.79	2799.21	2087.41	2556.1	3713.16	2628.48	1997.45	2189.97	3617.55	2184.91	3293.42	2234.39	2592.59	2234.18	2100.61	2677.23	2793.28	3937.29	1553.78	2643.7	2135.28	2438.69	3161.27	2600.63	3000.42	2126.93	2694.91
4470	3386.01	2195.91	2629.54	3015.99	3513	2369.73	2241.56	2115.3	2798.66	2950.52	3241.23	3096.61	3111.53	2934.77	2020.51	1926.29	2657.36	2226.65	2789.36	2104.23	2529.04	3660.19	2633.28	2000.96	2171.38	3610.13	2206.4	3326.67	2273.47	2571.08	2263.05	2084.04	2738.06	2863.95	3888.3	1535.51	2634.34	2141.44	2443.53	3172.05	2550.77	2971.01	2145.55	2713.3
4500	3420.48	2167.49	2611.16	3015.02	3488.54	2356.3	2174.07	2114.54	2782.46	2945.67	3250.91	3070.61	3086.39	2961.04	2022.33	1902.1	2722.45	2219.46	2765.12	2089.82	2524.58	3688.13	2601.28	1985.01	2124.49	3626.59	2210.35	3296.21	2240.01	2578.61	2193.65	2097.5	2743.82	2862.87	3911.4	1514.58	2644.42	2141.37	2469.01	3182.08	2590.88	2968.98	2136.33	2701.3
4530	3469	2168.58	2611.61	2972.26	3488.69	2397.19	2202.56	2086.24	2799.76	2941.51	3269.31	3071.62	3140.57	2955.59	1988.02	1917.21	2729.87	2201.73	2731.34	2065.38	2556.6	3715.33	2587.03	1979.11	2192.25	3576.32	2215.6	3279.99	2218.25	2562.43	2224.93	2063.05	2694.81	2758.2	3989.42	1543.67	2650.56	2140.56	2455.17	3198.93	2566.04	2988.81	2108.38	2693.84
4560	3399.85	2194.27	2632.8	2964.08	3511.37	2364.91	2213.3	2117.33	2788.67	2900.18	3257.04	3128.96	3135.66	2949.27	2010.86	1913.7	2704.39	2226.88	2807.26	2115.21	2535.73	3708.63	2600.48	1999.78	2169.59	3632.77	2202.01	3197.5	2209	2573.25	2198.53	2105.17	2722.31	2843.56	3896.42	1545.8	2617.81	2176.9	2459.45	3137.01	2558.66	2990.53	2131.18	2720.9
4590	3400.9	2166.16	2591.98	2961.86	3442.84	2347.75	2184.26	2127.65	2754.95	2916.64	3238.8	3040.01	3116.02	2920.94	2025.67	1857.17	2739.78	2222.35	2757.39	2074.5	2523.27	3713.51	2573.86	2002.06	2207.58	3579.84	2208.77	3267.46	2196.53	2587.27	2228.82	2120.86	2696.94	2892.37	3946.61	1516.61	2617.02	2140.82	2400.32	3166.33	2590.75	2940.6	2130.1	2690.2
4620	3423.61	2200.45	2636.82	3012.93	3488.44	2389.33	2192.82	2159.1	2772.65	2967.48	3225.78	3098.32	3113.07	2950.22	1981.39	1893.63	2723.19	2219.71	2802.96	2082.15	2551.29	3641.95	2591.03	1990.43	2182.67	3611.55	2236.58	3265.18	2200.26	2593.75	2249.41	2074.61	2722.22	2794.64	3902.05	1524.32	2645.96	2177.22	2433.04	3125.81	2587.82	2986.93	2086.89	2733.25
4650	3421.81	2197.61	2605.05	3019.15	3539.16	2376.45	2233.91	2068.19	2772.12	2913.54	3334.74	3087.95	3130.69	2913.52	2007.45	1871.86	2657.22	2199.9	2785.65	2071.07	2496.85	3715.23	2588.02	1994.64	2168.51	3633.41	2195.39	3273.63	2240.72	2577.42	2249.49	2050.6	2644.31	2894.3	3955.82	1533.49	2668.26	2160.27	2417.68	3141.17	2555.44	3037.43	2110.97	2743.74
4680	3416.3	2194.5	2615.28	2984.85	3517.78	2380.9	2177.64	2163.19	2798.7	2926.34	3224.09	3080.85	3112.14	2914.55	2015.36	1930.37	2746.13	2231.47	2767.03	2079.18	2549.25	3678.54	2577.11	2018.03	2192.23	3615.51	2178.45	3282.3	2257.18	2606.23	2215.61	2070.59	2747.2	2836.6	3918.09	1526.79	2612.11	2176.88	2447.97	3132.11	2516.99	3017.34	2165.12	2738.35
4710	3413.1	2200.6	2645.99	3016.85	3525.31	2371.2	2211.01	2064.38	2793.52	2899.1	3259.87	3058.1	3135.45	2970.7	2005.23	1911.45	2778.15	2234.07	2799.8	2085.3	2521.66	3673.35	2629.28	1989.33	2188.8	3613.66	2213.66	3253.32	2232.23	2570.97	2272.88	2050.7	2687.14	2851.94	3889.42	1524.97	2665.25	2143.44	2445.84	3179.72	2548.63	2982.53	2117.13	2740.86
4740	3435.66	2168.16	2630.77	2991.67	3527.25	2374.08	2185.39	2111.48	2805.41	2922.84	3271.99	3100.62	3119.51	2940.25	2028.81	1919.41	2710.45	2228.85	2818.22	2059.51	2521.47	3718.84	2626.98	1983.72	2236.38	3635.81	2163.2	3305.65	2296	2552.76	2191.58	2092.14	2652.21	2883.79	3946.93	1544.69	2649.56	2189.98	2411.83	3140.36	2584.33	3020.81	2122.5	2721.25
4770	3425.8	2197.36	2636.7	2983.7	3519.63	2333	2262.9	2099.9	2774.59	2900.72	3296.29	3065.78	3168.58	2955.48	2039.33	1880.44	2707.04	2227.11	2780.57	2037.35	2581.07	3718.73	2576.1	2003.57	2164.95	3608.02	2194.36	3274.28	2272.33	2600.32	2227.9	2117.07	2680.43	2823.73	3925.27	1528.62	2668.05	2164.14	2439.02	3146.46	2575.6	2965.93	2132.03	2721.48
4800	3396.9	2170.45	2604.08	3001.5	3489.97	2376.81	2213.5	2075.41	2770.77	2871.91	3283.16	3036	3147.76	2949.07	2013.87	1891.79	2757.64	2239.59	2784.2	2097.35	2556.73	3667.82	2602.26	1965	2198.69	3594.92	2194.35	3294.95	2200.04	2548.82	2231.63	2050.67	2666.02	2876.25	3935.26	1511.58	2613.41	2205.07	2431.86	3129.68	2555.97	2966.53	2120.4	2705.97
4830	3441.63	2162.71	2606.63	2975.88	3490.82	2366.56	2221.78	2081.86	2776.78	2930.9	3294.75	3068.53	3081.66	2962.33	2020.92	1898.38	2747.32	2250.65	2807.53	2104.04	2597.34	3707.03	2616.44	2022.48	2189.36	3588.26	2193.26	3222.34	2207.42	2559.08	2201.77	2085.81	2625.39	2849.76	3934.91	1527.76	2638.84	2186.16	2442.93	3173.25	2544.27	2971.21	2126.07	2743.1
4860	3395.47	2207.06	2632.13	2997.85	3483.54	2363.78	2212.94	2093.32	2779.08	2930.53	3271.87	3082.38	3087.79	2976.92	1996.13	1893.53	2777.04	2207.11	2813.91	2126.46	2540.74	3679.3	2594.21	1987.62	2179.64	3614.86	2213.49	3278.84	2236.47	2598.91	2202.41	2036.07	2618.41	2825.56	3971.18	1511.84	2675.82	2194.54	2455.24	3178.15	2513.34	3006.23	2113.93	2734.4
4890	3407.15	2148.67	2617.22	3006.94	3536.67	2359.54	2211.45	2083.07	2801.78	2943.3	3261.98	3069.53	3091.52	2931.22	2034.5	1913.16	2711.23	2270.34	2800.31	2110.67	2559.07	3678.82	2581.27	2032.55	2160.95	3596.81	2197.52	3249.07	2231.03	2548.45	2241.55	2033.86	2693.78	2904.06	3927.5	1515.69	2630.41	2176.27	2477.82	3122.17	2540.1	2989.79	2146.17	2682.67
4920	3351.73	2207.58	2651.31	2983.75	3515.88	2329.37	2215.41	2082.71	2775.65	2958.98	3267.04	3092.44	3103.12	2907.06	2013.74	1905.36	2734.36	2208.61	2787.31	2146.53	2539.26	3667.24	2614.35	1998	2206.74	3591.32	2177.14	3261.1	2290.05	2582.14	2243.58	2064.8	2635.96	2881.46	3958.06	1529.76	2660.92	2192.91	2468.01	3150.38	2578.34	2997.02	2132.5	2754.16
4950	3391.52	2222.28	2646.56	3010.82	3520.95	2391.06	2217.37	2079.59	2773.5	2885.78	3320.79	3080.17	3101.45	2939.05	2031.69	1908.08	2740.5	2249.86	2779.03	2106.99	2528.89	3726.31	2606.87	2025.89	2203.2	3614.01	2172.91	3302.88	2268.46	2588.51	2225.1	2114.56	2659.8	2810.37	3948.73	1538.14	2662.46	2111.8	2406.81	3192.39	2559.35	2993.67	2159.15	2721.5
4980	3381.26	2179.27	2647.11	2987.43	3489.03	2353.95	2203.66	2095.41	2781.75	2981.9	3281.09	3092.35	3138.66	2924.26	2034.99	1921.48	2767.85	2201.83	2818.43	2075.79	2545.31	3667.64	2622.64	1973.37	2207.1	3595.91	2220.48	3280.19	2226.95	2602.5	2215.99	2079.53	2723.32	2842.19	3913.75	1523.7	2650.38	2179.12	2414.93	3148.95	2576.72	3016.38	2130.72	2653.28
5010	3382.9	2159.79	2646.01	2992.57	3474.54	2358.96	2216.09	2129.84	2770.02	2893.18	3233.99	3100.64	3069.25	2935.94	2006.58	1909.46	2712.17	2213.3	2753.64	2088.44	2521.16	3686.43	2608.44	1957.75	2170.36	3631.54	2218.21	3267.4	2242.45	2554.87	2219.77	2109.95	2682.33	2736.45	3862.85	1544.88	2631.55	2133.42	2443.61	3198	2582.44	2986.97	2124.34	2711.74
5040	3430.5	2160.73	2652.47	2981.05	3504.93	2338.15	2144.41	2112.33	2792.88	2913.56	3251.97	3085.68	3110.46	2936.54	1994.19	1897.57	2703.22	2219.14	2778.11	2106.24	2524.4	3631.55	2580.14	1990.06	2144.8	3604.75	2197.98	3245.14	2259.86	2550.83	2186.72	2050.87	2710.72	2830.91	3924.82	1512.09	2639.54	2142.71	2396.49	3173.83	2580.76	2994.49	2110.47	2751.21
5070	3383.58	2172.49	2634.37	3025.94	3508.55	2378.31	2170.94	2120.2	2805.82	2948	3260.84	3134.81	3100.33	2953.81	1991.69	1922.9	2751.17	2223.53	2769.56	2083.75	2522.34	3681.99	2617.12	1994.44	2222.83	3625	2196.56	3242.53	2276.42	2563.14	2247.65	2066.14	2750.75	2863.26	3915.84	1520.09	2627.46	2112.48	2428.3	3209.01	2560.84	3035.29	2114.28	2702.57
5100	3388.72	2195.4	2645.3	2980.63	3501.88	2355.71	2188.22	2096.22	2823.93	2963.96	3294.57	3045.84	3114.48	2925.33	1984.63	1902.46	2709.43	2243.55	2828.34	2077.33	2534.34	3689.22	2598.26	2007.71	2209.68	3609.83	2185.96	3232.94	2254.75	2579.5	2218.44	2074.78	2703.91	2766.49	3952.11	1521.46	2630.43	2134.6	2512.94	3209.26	2573.29	2964.95	2126.62	2718.61
5130	3382.35	2188.57	2606.07	3008.04	3488.92	2391.21	2184.69	2076.6	2786.31	2970.82	3273.8	3028.73	3144.44	2949.11	2028.12	1934.97	2699.89	2241.59	2758.76	2095.53	2540.52	3702.3	2596.5	1978.65	2211.65	3606.46	2220.12	3339.53	2234.61	2554.7	2196.42	2078.36	2723.4	2876.43	3925.94	1540.52	2677.9	2198.27	2431.45	3162.72	2580.03	3007.85	2128	2638.3
5160	3384.97	2191.68	2613.08	2985.46	3519.33	2352.37	2227.64	2081.76	2770.6	2929.87	3246.19	3087.06	3089.58	2922.25	2051.32	1913.52	2786.86	2213.31	2805.27	2062.01	2488.64	3680.36	2610.63	2018.94	2163.2	3657.21	2208.58	3253.45	2232.25	2603.87	2179.81	2076.64	2664.85	2809.72	3943.47	1546.88	2634.52	2202.24	2396.06	3116.93	2473.7	2995.74	2147.98	2708.3
5190	3380.59	2167.03	2615.82	2985.98	3510.83	2375.66	2229.11	2055.55	2792.28	2926.12	3238.3	3078.72	3088.14	2914.82	1984.49	1909.38	2775.46	2282.6	2724.41	2123.8	2563.32	3723.45	2624.32	1966.26	2203.62	3629.75	2201.86	3232.11	2212.85	2581.1	2158.37	2070.03	2651.46	2828.13	3956.31	1527.34	2641.94	2189.59	2400.85	3146.53	2584.92	2945.96	2175.6	2678.91
5220	3413.08	2184.89	2642.76	3023.87	3496.18	2379.04	2176.62	2108.69	2782.33	2911.2	3292.74	3068.92	3099.24	2930.16	2005.06	1897.92	2707.5	2217.88	2832.34	2113.92	2528.53	3676.17	2570.99	1969.82	2229.9	3619.42	2197.74	3292.85	2225.52	2546.27	2234.01	2080.5	2644.07	2875.81	3936.14	1566.8	2609.22	2162.61	2386.54	3111.99	2544.95	3000.5	2109.74	2688.82
5250	3449.71	2209.07	2678	2982.72	3507.3	2413.84	2214.68	2095.64	2780.88	2900.24	3243.93	3070.77	3163.13	2941.07	1992.86	1926.13	2722.72	2245.54	2797.87	2106.49	2514.36	3729.86	2559.82	2002.58	2219.77	3635.15	2177.18	3286.04	2229.46	2549.97	2264.33	2094.98	2687.18	2885.22	3922.08	1532.95	2630.62	2171.45	2427.93	3108.99	2570.36	3016.71	2124.69	2670.59
5280	3416.85	2193.72	2615.78	3021.2	3518.37	2376.89	2155.75	2061.69	2763.85	2894.09	3259.43	3042.97	3106.51	2931.09	2025.66	1893.94	2743.3	2244.96	2799.16	2097.2	2540.34	3709.91	2618.94	1976.91	2203.08	3573.68	2196.29	3244.88	2223.62	2563.7	2250.95	2020.13	2687.96	2888.1	3950.36	1524.86	2661.05	2169.3	2407.95	3194.91	2582.25	2981.96	2112.7	2727.57
5310	3383	2175.06	2637.42	2942.12	3502.24	2382.8	2245.3	2091.67	2787.55	2930.3	3266.14	3078.87	3136.54	2921.63	2004.43	1941.39	2656.47	2243.91	2784.08	2105.44	2508.75	3729.32	2531.56	1969.94	2215.46	3598.44	2205.02	3255.5	2213.09	2551.19	2249.5	2044.66	2645.17	2839.34	3943.77	1546.99	2628.9	2161.84	2481.14	3143.89	2587.29	3054.14	2124.7	2710.09
5340	3449.63	2178.14	2628.5	2976.94	3502.24	2363.82	2218.09	2062.53	2769.02	2921.99	3235	3081.45	3099.28	2929.88	2004.75	1880.56	2750.36	2210.43	2778.76	2057.83	2541.53	3723.73	2595.27	1989.37	2139.57	3595.02	2177.97	3305.92	2288.13	2550.89	2209.91	2073.46	2661.84	2834.97	3919.98	1520.86	2577.51	2176.23	2449.43	3114.97	2555.11	2997.77	2083.51	2651.92
5370	3439.97	2187.89	2617.12	2970.2	3497.61	2361.36	2201.69	2062.66	2821.89	2938.42	3255.66	3045.76	3111.87	2948.4	1978.67	1908.46	2714.34	2260.45	2789.51	2121.15	2539.03	3718.49	2613.55	1990.53	2216.54	3620.96	2171.8	3294.32	2223.78	2606.32	2199.9	2005.91	2676.91	2814.38	3880.63	1533.6	2631.75	2182.88	2386.21	3153.84	2586.61	3006.95	2116.5	2724.26
5400	3375.75	2182.25	2597.98	3002.96	3497.17	2349.42	2256.21	2101.39	2799.26	2882.74	3327.26	3098.81	3153.6	2913.8	2028	1928.07	2721.33	2253.3	2761.04	2052.49	2533.42	3685.02	2588.02	1969.84	2178.31	3575.94	2163.44	3253.81	2165.45	2590.93	2214.38	2015.91	2634.77	2852.39	3920.94	1536	2631.96	2163.48	2404.63	3203.11	2579.4	2964.39	2165.62	2751.55
5430	3387.51	2182.34	2590.65	2994.94	3513.12	2399.27	2228.85	2077.66	2757.98	2949.73	3240.37	3077.53	3112.68	2925.99	1994.86	1900.64	2723.46	2250.47	2782.84	2100.17	2579.12	3689.38	2603.29	1984.27	2182.15	3603.02	2177.23	3269.08	2235.01	2547.19	2272.04	2085.21	2668.55	2870.36	3872.39	1525.67	2695.44	2118.32	2478.42	3172.94	2626.65	2998.91	2112.09	2742.39
5460	3382.05	2184.05	2605.41	2993.84	3527.71	2366.91	2232.26	2060.88	2773.79	2930.05	3283.01	3066.92	3129.32	2971.46	1986.44	1961.61	2669.52	2230.02	2832.49	2057.07	2504.87	3732.74	2632.69	1981.33	2239.3	3578.69	2169.97	3232.1	2226.46	2553.79	2192.61	2073.44	2720.5	2797.45	3927.19	1517.3	2649	2191.22	2469.25	3136.01	2565.86	2942.86	2138.85	2739.59
5490	3408.24	2173.52	2628.08	3005.88	3486.07	2374.51	2245.16	2127.77	2785.23	2905.53	3226.52	3085.68	3093.67	2930.04	2017.32	1867.35	2754.24	2243.15	2833.99	2077.9	2472.52	3700.91	2588.24	1990.42	2190.16	3624.26	2181.33	3290.11	2256.14	2573.89	2268.58	2079.82	2770.14	2767.83	3935.49	1524.41	2671.52	2162.49	2427.09	3184.06	2537.52	3006.82	2093.29	2755.05
5520	3372.56	2192.45	2626.96	3004.35	3483.27	2361.75	2234.02	2080.71	2787.94	2914.11	3257.56	3069.82	3156.71	2935.28	2008.95	1898.59	2722.23	2244.09	2786.63	2104.7	2546.11	3696.11	2637.03	1978.11	2180.79	3566.13	2204.56	3257.33	2216.08	2545.74	2217.91	2065.15	2687.41	2827.41	3888.14	1549.82	2634.63	2179.3	2471.58	3115.09	2554.6	2934.33	2092.92	2724.47
5550	3424.79	2171.69	2672.8	3056.69	3500.56	2392.01	2207.35	2065.22	2809.3	2939.64	3255.05	3044.54	3106.88	2895.69	2012.92	1898.32	2735.1	2205.04	2816.53	2098.93	2522.29	3662.4	2591.53	1988.67	2209.49	3631.12	2183	3277.36	2206.9	2573.03	2167.13	2074.22	2727.75	2842.02	3936.3	1543.07	2658.62	2177.21	2410.98	3179.44	2556.89	2983.76	2138.19	2694.32
5580	3424.83	2170.39	2604.87	2992.06	3521.33	2367.73	2189.75	2018.58	2779.91	2969.38	3260.49	3061.75	3132.25	2948.55	2001.08	1934.23	2730.49	2191.2	2770.4	2098.46	2510.9	3724.22	2570.92	1987.31	2217.78	3587.64	2196.2	3208.73	2252.41	2553.61	2196.54	2068.63	2700.7	2794.55	3894.86	1522.94	2627.36	2175.42	2356.48	3128.05	2599.31	2993.95	2125.11	2645.82
5610	3366.26	2153.88	2598.74	2969.51	3536.87	2416.34	2187.55	2060.52	2764.44	2947.93	3279.51	3068.59	3101.44	2911.45	1976.81	1954.19	2733.56	2208.49	2778.21	2056.29	2525.74	3727.71	2608.91	1980.79	2202.34	3594.65	2198.09	3284.47	2224.91	2540.13	2172.76	2094.47	2662.21	2855.33	3927.7	1517.21	2614.68	2172.64	2468.51	3121.7	2585.76	3061.19	2132.03	2686.28
5640	3427.77	2144.15	2577.31	3003.09	3500.63	2351.5	2224.23	2077.03	2815.9	2933.42	3230.78	3105.05	3120.63	2940.73	1980.58	1907.99	2831.32	2215.98	2801.14	2078.29	2520.93	3722.98	2549.46	2011.17	2201.21	3605.15	2213.78	3255.74	2193.29	2580.69	2193.25	1987.91	2631.5	2814.41	3897.71	1518.13	2566.49	2147.75	2440.85	3172.59	2534.09	3012.04	2141.72	2711.71
5670	3397.94	2151.41	2661.97	2971.04	3504.96	2406.15	2235.43	2105.94	2780.09	2952.76	3280.23	3079.69	3122.28	2959.18	1984.86	1871.19	2762.76	2209.13	2809.74	2067.01	2528.14	3694.01	2598.04	1966.33	2247.12	3658.69	2194.77	3266.83	2172	2581.02	2200.78	2016.1	2664.12	2861.41	3916.04	1527.49	2650.78	2141.62	2387.79	3150.3	2568.26	3009.7	2135.87	2697.36
5700	3405.01	2192.7	2657.74	2998.96	3494.44	2378.6	2230.23	2082.92	2774.3	2904.37	3251.83	3068.66	3120.48	2954.85	2015.08	1902.57	2740.16	2196.24	2792.4	2057.63	2539.42	3713	2637.78	1980.27	2156.91	3637.7	2193.55	3251.02	2216.18	2564.48	2220.14	2082.43	2692	2789.47	3930.44	1521.77	2640.34	2195.11	2459.45	3158.05	2582.49	2975.51	2072.97	2726.41
5730	3422.62	2188.12	2645.93	2995.77	3535.67	2373.86	2208.24	2089.77	2781.64	2924.66	3279.85	3075.39	3109.77	2935.86	2002.46	1898.84	2725.67	2260.28	2818.24	2075.72	2549.65	3696.08	2652.41	1967.83	2219.84	3596.46	2172.93	3264.86	2212.94	2602.07	2257.35	2021.39	2714.63	2862.77	3880.87	1518.03	2680.94	2154.04	2452.21	3106.59	2564.71	2972.99	2117.81	2715.41
5760	3364.86	2178.46	2628.23	3021.47	3471.34	2359.63	2178.79	2076.08	2740.03	2922.95	3247.44	3061.87	3097.15	2927.83	2025.72	1883.38	2707.1	2262.03	2787.72	2074.99	2523.1	3669.84	2645	1995.71	2183.29	3635.08	2207.93	3247.67	2242.3	2554.91	2193.81	2040.01	2689.76	2877.67	3919.58	1545.63	2652.75	2214.43	2415.6	3170.62	2580.52	2994.31	2137.11	2730.02
5790	3382.08	2172.31	2633.79	2987.21	3534.48	2376.44	2191.04	2093.35	2823.7	2909.88	3234.1	3103.11	3153.15	2956.33	2012.66	1886.24	2696.89	2255.49	2750.26	2055.37	2526.92	3707.48	2599.1	1976.11	2177.72	3624.78	2188.21	3287.01	2217.89	2594.59	2226.98	2064.68	2652.87	2852.11	3910.57	1523.7	2627.86	2165.44	2406.95	3154.02	2619.43	3023.81	2124.22	2706.23
5820	3418.3	2175.82	2596.65	2989.21	3497.97	2376.78	2223.31	2069.49	2811.31	2944.72	3276.85	3094.77	3106.61	2939.84	2033.33	1886.78	2715.23	2236.75	2799.69	2075.97	2541.14	3682.01	2566.4	1982.32	2207.68	3601.17	2173.39	3261.14	2239.29	2551.63	2225.81	2041.75	2672.94	2843.77	3926.21	1545.06	2618.71	2145.26	2445.97	3116.1	2498.48	2958.45	2091.92	2724.06
5850	3417.23	2154.23	2645.4	2983.78	3507.1	2383.33	2234.93	2108.01	2808.35	2884.65	3309.75	3055.33	3074.22	2983.95	1976.97	1898.58	2758.11	2215.19	2820.29	2082.8	2585.46	3694.46	2625.79	1997.67	2176.96	3613.11	2252.06	3223.84	2264.37	2518.09	2201.1	2026.5	2692.5	2821.06	3911.14	1538.29	2588.58	2150.55	2407.33	3154.69	2561.25	2987.75	2120.76	2740.21
5880	3374.23	2178.73	2629.24	3008.63	3496.05	2315.28	2234.13	2086.96	2747.82	2924.18	3240.13	3014.57	3111.55	2956.36	1997.95	1916.48	2709.74	2220.1	2776.31	2083.81	2518.19	3646.39	2582.89	1987.89	2106.2	3615.22	2211.56	3179.18	2236.6	2578.23	2262.6	2058.62	2649.88	2866.63	3931.67	1540.83	2623.62	2176.18	2381.2	3111.82	2589.04	3010.99	2124.36	2683.79
5910	3452.22	2194.17	2620.56	2998.02	3520.13	2344.01	2209.77	2070.94	2772.11	2928.22	3236.25	3095.41	3118.06	2930.43	1979.29	1911.18	2719.72	2248.86	2809.71	2130.53	2545.89	3681.79	2559.88	2019.86	2198.21	3577.51	2221.34	3254.68	2180.85	2652.56	2223.02	2049.69	2721.5	2824.07	3874.85	1520.97	2639.34	2128.39	2442.19	3185.98	2516.63	2963.31	2144.03	2681.69
5940	3394.86	2159.73	2628.01	2994.87	3473.06	2374.84	2232.36	2112.95	2728.32	2937.18	3285.83	3082.28	3134.13	2933.89	2012.82	1957.93	2760.67	2234.47	2803.72	2086.49	2550.58	3673.69	2627.73	1987	2140.41	3623.11	2192.86	3279.73	2264.16	2593.15	2213.26	2064.14	2673.03	2838.99	3932.66	1553.99	2609.84	2243.5	2451.42	3158.37	2540.67	2956.4	2125.4	2676.54
5970	3387.62	2206.12	2622.14	2987.43	3477.63	2386.38	2236.16	2056.04	2766.78	2934.1	3262.37	3067.9	3115.92	2925.93	2012.39	1930.86	2721.15	2238.28	2766.5	2131.56	2513.31	3706.85	2618.85	1991.08	2176.83	3602.76	2194.22	3275.08	2233.29	2609.01	2258.74	2091.23	2658.72	2884.51	3881.59	1548.86	2638.66	2134.25	2460.16	3182.45	2559.38	2995.05	2100.33	2766.58
6000	3414.67	2152.49	2624.2	2979.83	3465.58	2361.16	2208.05	2087.9	2814.46	2956.99	3257.81	3066.72	3105.39	2942.11	1990.05	1890.48	2701.86	2265.51	2775.67	2066.56	2576.95	3722.35	2599.89	1960.28	2185.63	3607.41	2161.49	3246.56	2263.27	2586.56	2233.01	2059.56	2692.28	2841.51	3891.05	1531.47	2692.86	2180.29	2440.71	3154.04	2565.25	2927.77	2154.59	2720.03
6030	3428.13	2170.19	2636.19	2979.5	3489.9	2411.28	2265.93	2083.88	2826.92	2985.29	3260.69	3014.04	3098.57	2964.5	1988.16	1880.48	2715.81	2256.65	2750.04	2122.92	2560.85	3676.42	2619.93	1981.62	2210.62	3624.8	2176.91	3305.71	2251.33	2569.48	2244.55	2094.24	2774.12	2848.98	3906.2	1508.44	2631.01	2186.07	2416.3	3121.6	2538.83	2976.21	2128.43	2695.97
6060	3415.56	2159.3	2644.69	2994.78	3464.72	2345.49	2232.48	2069.01	2772.78	2921.43	3270.28	3073.29	3104.06	2940.41	1992.5	1934.94	2733.52	2174.5	2834.14	2077.94	2522.81	3724.59	2588.47	2018.22	2165.83	3636.31	2173.12	3260.16	2217.07	2575.56	2224.29	2050.21	2691.7	2812.23	3920.13	1559.28	2661.85	2118.35	2398.03	3128.07	2557.12	3032.24	2107.31	2705.46
6090	3437.51	2164.01	2594.67	3028.34	3542	2370.88	2212.33	2040.42	2790.2	2924.55	3275.27	2994.73	3086.74	2942.74	2018.31	1913.24	2708.76	2252.58	2744.73	2069.49	2531.05	3742.42	2595.16	1995.35	2203.35	3642.29	2189.77	3284.37	2290.17	2542.35	2191.17	2046.97	2762.12	2779.09	3925.06	1544.71	2635.5	2180.56	2440.34	3167.8	2543.36	2939.57	2128.13	2759.8
6120	3372.2	2184.37	2630.23	3032.05	3455.86	2388.33	2210.89	2067.18	2805.21	2913.17	3264.4	3029.21	3062.74	2901.9	2003.9	1928.69	2730.12	2199.99	2854.65	2082.25	2529.67	3699	2573.55	1956.42	2189.36	3614.78	2197.71	3275.84	2212.78	2597.77	2182.01	2083.97	2685.43	2800.24	3932.9	1556.41	2617.95	2186.65	2373.32	3168.3	2585.06	3050.95	2147.11	2674.81
6150	3393.83	2167.12	2611.23	3004.14	3531.85	2348.21	2249.42	2053.75	2786.86	2942.96	3237.85	3060.31	3105.36	2985.77	2010.84	1922.59	2716.78	2240.7	2778.97	2080.69	2516.53	3728.14	2611.73	2007.64	2199.84	3596.42	2198.51	3346.99	2274.13	2590.07	2214.95	2083.35	2646.59	2834.97	3899.19	1523.85	2631.56	2172.68	2446.17	3166.35	2563.01	2992.8	2133.71	2766.93
6180	3400.27	2191.32	2626.2	2989.31	3484.64	2370.77	2240.3	2045.95	2774.95	2925.86	3305.03	3059.26	3120.14	2918.69	2044.78	1905.21	2759.14	2205.83	2805.21	2084.32	2525.77	3695.35	2619.14	2007.34	2260.29	3614.5	2202.58	3306.17	2219.64	2571	2206.78	2078.78	2668.47	2804.58	3934.73	1561.93	2662.49	2139.19	2437.57	3161.68	2580	2972.09	2107.01	2682.84
6210	3407.97	2190.56	2638.08	3001.13	3470.42	2349.45	2198.85	2074.71	2781.73	2910.78	3255.67	3053.81	3060.48	2968.28	2012.02	1926.11	2784.85	2234.74	2780.9	2088.42	2537.39	3697.13	2565.98	1960.23	2220.77	3624.22	2209.05	3272.58	2117.7	2573.94	2210.58	2038.17	2657.31	2884.32	3938.82	1535.74	2613.52	2184.91	2486.58	3103.53	2587.2	3014.31	2073.16	2724.61
6240	3347.85	2142.06	2656.61	2973.7	3463.11	2340.89	2201.86	2097.94	2771.67	2950.03	3264.16	3078.27	3134.58	2915.61	2036.75	1897.52	2750.01	2211.42	2775.76	2063.03	2539.27	3718.76	2612.72	1985.7	2198.59	3573.52	2214.75	3275.6	2193.25	2545.9	2249.13	2088.89	2683.79	2832.43	3914.19	1533.28	2602.6	2171.73	2453.63	3089	2515.14	3022.81	2102.37	2747.58
6270	3412.28	2180.27	2653.73	3027.46	3516.66	2410.83	2175.57	2116.11	2804.62	2899.66	3228.75	3042.42	3077.94	2932.96	2014.2	1900.49	2732.94	2219.09	2769.46	2088.74	2524.31	3683.83	2578.89	1975.68	2161.89	3595.11	2175	3226.96	2203.21	2588.4	2205.5	2030.23	2654.52	2873.32	3925.8	1513.68	2663.48	2158.92	2384.7	3165.86	2598.54	2999.09	2138.57	2643.77
6300	3436.57	2187.69	2622.33	3003.51	3503.22	2351.26	2184.35	2112.39	2787.19	2876.1	3295.57	3066.05	3101.14	2938.03	2024.15	1919.01	2738.67	2199.96	2773.01	2069.05	2566.38	3673.85	2582.37	1985.91	2183.9	3605.29	2211.48	3288.52	2247.62	2545.15	2197.98	2014.19	2603.22	2817.52	3890.81	1555.39	2659.79	2124.08	2420.59	3193.45	2581.08	3023.7	2106.87	2726.88
6330	3409.72	2168.46	2641.74	2973.3	3552.93	2367.33	2208.6	2104.57	2785.33	2914.37	3252.72	3066.6	3103.36	2978.74	2034.44	1923.06	2771.78	2211.59	2762.68	2107.79	2541.14	3676.37	2580.74	1990.79	2213.26	3603.26	2170.77	3303.75	2227.21	2562.66	2251.42	2033.34	2674.78	2787.55	3903.77	1524.21	2618.62	2213.26	2403.26	3122.93	2570.81	2959.1	2112.01	2695.99
6360	3448	2182.06	2626.98	2995.45	3501.36	2377.57	2158.45	2137.65	2770.18	2882.21	3245.96	3079.1	3104.72	2930.46	1985.52	1908.96	2743.72	2241.01	2774.28	2122.42	2528.51	3715.19	2568.58	1978.87	2203.38	3633.86	2191.91	3283.85	2211.95	2589.87	2224.03	2086.7	2680.62	2809.23	3937.58	1553.42	2633.68	2186.07	2454.94	3161.16	2571.2	3013.73	2101.39	2721.88
6390	3441.27	2186.87	2637.89	3001.66	3510.62	2374.04	2221.42	2103.08	2782.12	2938.89	3231.7	3109.7	3077.19	2959.05	2002.61	1911.32	2723.66	2271.65	2792.82	2057.06	2575.58	3719.51	2586.83	1982.18	2177.94	3585.24	2195.73	3196.63	2250.68	2634.76	2284.54	2108.39	2701.51	2752.12	3904.21	1511.96	2651.68	2198.24	2477.74	3171.72	2599.31	2999.2	2118.61	2701.56
6420	3340.61	2198.89	2619.71	3008.17	3521.36	2387.92	2199.82	2138.12	2795.23	2936.46	3253.14	3111.25	3093.12	2928.06	2013.04	1890.96	2760.59	2251.9	2799.47	2102.05	2500.15	3703.77	2602.6	2014.19	2196.02	3618.23	2206.55	3270.1	2214	2562.43	2268.97	2049.44	2695.35	2864.01	3909.52	1535.47	2599.2	2163.44	2478.29	3218.83	2489.45	2994.88	2118.97	2726.15
6450	3448.87	2165.91	2629.26	3006.84	3494.08	2366.17	2179.53	2058.21	2735.34	2962.13	3239.14	3067.82	3124.56	2947.52	1993.85	1914.17	2715.19	2231.31	2794.06	2117.44	2525.46	3685.6	2601.11	1970.01	2187.27	3629.37	2180.66	3286.24	2197.6	2536.38	2181.21	2075.48	2698.21	2803.91	3875.81	1553.85	2589.76	2136.89	2419.92	3156.69	2528.78	3003.55	2137.86	2692.36
6480	3419.79	2175.53	2625.56	2971.67	3483.82	2400.65	2192.65	2095.68	2762.96	2873.86	3271.78	3118.59	3070.4	2935.83	2005.38	1919.05	2726.52	2211.7	2761.72	2089.95	2548.51	3675.81	2646.49	2003.61	2173.99	3588.65	2165.43	3262.88	2239.58	2538.94	2302.74	2051.77	2682.54	2766.06	3902.21	1545.77	2644.08	2178.95	2410.12	3156.27	2533.47	3056.95	2123.45	2742.78
6510	3437.96	2176.4	2651.48	3001.38	3473.28	2387.2	2209.85	2063.67	2788.3	2903.03	3299.77	3075.57	3146.3	2907.51	2000.87	1924.69	2754.04	2251.29	2847.61	2100.73	2514.41	3654.16	2602.69	1986.01	2160.63	3597.82	2186.29	3245.2	2206.11	2574.29	2291.3	2122.16	2724.84	2787.69	3897.37	1540.28	2594.6	2190.82	2453.69	3154.48	2568.58	2980.75	2107.22	2728.02
6540	3388.13	2155.13	2614.79	3007.21	3499.28	2311.58	2206.79	2061.23	2772.29	2886.28	3255.4	3056.36	3145.59	2967.13	1963.48	1901.67	2758.95	2213.61	2788.91	2124.23	2467.09	3698.72	2604.71	1984.52	2116.44	3583.76	2206.35	3260.32	2252.56	2588.2	2225.96	2026.81	2677.15	2888.21	3936.7	1519.85	2626.21	2107.82	2438.76	3170.5	2552.69	2959.98	2133.25	2729.2
6570	3473.47	2197.6	2621.72	2997.51	3501.54	2366.39	2243.28	2075.61	2828.04	2882.32	3250.12	3063.5	3113.86	2911.19	2002.9	1868.54	2733.72	2234.16	2829.24	2113.34	2572.43	3702.83	2611.74	1968.66	2208.06	3598.91	2174.04	3239.87	2210.32	2603.31	2230.1	2026.03	2663.54	2839.73	3920.69	1506.9	2657.69	2200.05	2485.88	3122.56	2582.59	2984.78	2127.26	2716.36
6600	3432.17	2164.15	2594.34	2988.69	3508.31	2381.66	2216.79	2092.46	2770.33	2933.77	3258.46	3059.35	3110.26	2938.31	1992.43	1923.42	2758.6	2220.25	2802.66	2094.09	2490.98	3678.5	2580.32	1999.42	2211.71	3612.04	2172.55	3292.03	2261.53	2591.62	2169.23	2112.83	2663.43	2831.12	3934.61	1509.7	2651.57	2190.44	2440.56	3208.16	2523.78	2991.96	2123.45	2694.04
6630	3423.67	2173.11	2632.94	3004.17	3508.84	2388.5	2201.83	2098.47	2783.74	2933.26	3265.05	3038.68	3108.49	2955.88	2068.53	1907.98	2792.21	2219.43	2800.34	2058.96	2486.74	3680.79	2597.51	1982.58	2203.3	3591.6	2192.73	3265.05	2339.96	2582.7	2185.24	2071.27	2607.76	2871.68	3948.31	1518.83	2652.74	2168.72	2431.33	3152.32	2578.13	3024.21	2081.7	2721.75
6660	3470.96	2195.89	2596.4	3017.39	3546.69	2325.25	2204.63	2072.55	2790.79	2902.52	3292.34	3099.15	3100.91	2914.9	1990.07	1904.44	2743.07	2223.97	2783.27	2063.86	2467.6	3759.71	2605.59	1985.28	2203.87	3593.17	2207.22	3297.88	2213.51	2550.1	2216.29	2075.08	2735.58	2878.46	3904.01	1528.27	2664.49	2155.65	2417.99	3218.66	2563.79	3008.91	2108.51	2719.52
6690	3426.27	2187.94	2602.75	2972.93	3514.3	2345.19	2238.43	2057.74	2799.18	2941.76	3277.69	3077.58	3072.2	2935.32	2029.81	1908.88	2765.55	2207.86	2814.96	2099.6	2575.09	3732.86	2634.4	1992.08	2228.11	3588.95	2214.66	3261.12	2186.52	2560.31	2180.16	2063.2	2639.6	2820.23	3902.06	1507.28	2573.84	2135.36	2435.83	3170.62	2578.15	3002.72	2128.69	2707.57
6720	3428.89	2169.93	2590.07	2993.48	3502.18	2392.04	2192.47	2080.56	2810.03	2890.47	3221.77	3035.64	3084.32	2920.43	1985.81	1933.22	2752.07	2236.87	2824.23	2067.37	2511.47	3683.24	2603.7	1999.09	2193.86	3590.23	2217.38	3244.25	2278.23	2603.79	2257.76	2096.53	2647.87	2829.6	3910.24	1539.37	2672.47	2143.04	2425.56	3134.93	2562.26	2979.19	2156.86	2752.25
6750	3420.06	2195.66	2652.03	3009.37	3517.08	2340.5	2245.07	2074.71	2739.18	2952.48	3240.95	3082.28	3133.19	2961.55	2006.33	1919.91	2786.58	2261.41	2828.85	2058.22	2556.05	3668.98	2616.02	2019.33	2213.24	3624.27	2176.88	3294.46	2200.07	2532.17	2269.18	2058	2650.28	2830.67	3921.34	1513.39	2686.2	2145.39	2400.88	3131.45	2592.28	2994.38	2117.2	2708
6780	3427.17	2144.92	2606.38	2997.82	3489.88	2395.3	2188.43	2078.5	2781.95	2897.65	3266.36	3058.56	3070.26	2946.61	2023.21	1934.9	2707.11	2218.79	2814.12	2093.75	2527.94	3725.13	2607.37	2021.09	2192.04	3629.14	2183.97	3276.99	2221.93	2595.51	2259.42	2057.54	2606.24	2889.6	3907.85	1551.32	2616.34	2122.12	2441.21	3183.9	2583.49	2970.2	2128.26	2700.58
6810	3449.98	2178.51	2626.92	3013.77	3503.93	2386.77	2216.44	2069.26	2761.72	2928.8	3281.92	3076.43	3134.05	2941.38	2027.07	1918.03	2799.45	2236.49	2705.86	2118.74	2543	3710.86	2584.81	1993.7	2224.78	3620.42	2188.68	3314.24	2182.07	2560.55	2205.01	2023.39	2662.58	2830.53	3898.46	1508.05	2632.74	2145.9	2424.13	3126.03	2574.84	2978.67	2151.11	2792.04
6840	3396.33	2160.37	2629.1	3002.14	3474.52	2387.76	2232.31	2070.3	2774.99	2945.82	3259.52	3029.84	3091.05	2973.94	2003.84	1944.36	2798.17	2252.95	2741.73	2132.04	2576.97	3728.44	2636	1986.86	2166.58	3631.58	2215.3	3240.77	2209.8	2570.08	2252.75	2092.71	2684.11	2930.85	3912.47	1557.89	2602.33	2158.62	2463.56	3153.89	2520.21	3005.01	2151.62	2704.03
6870	3372.42	2152.47	2640.16	3001.63	3504	2361.83	2221.63	2064.55	2824.82	2970.98	3253.97	3054.51	3118.54	2956.05	1971.3	1920.89	2748.78	2192.98	2783.18	2099.7	2565.75	3740.16	2581.41	1990.54	2168.7	3636.15	2197.7	3262.21	2247.01	2562.63	2216.65	2044.21	2650.56	2849.26	3910.07	1532.36	2620.83	2167.86	2423.88	3133.03	2600.16	2955.51	2113.57	2720.14
6900	3407.54	2174.07	2661.23	2987.44	3512.48	2351.86	2211.24	2107.28	2797.43	2945.87	3235.3	3019.19	3086.8	2944.74	2046.3	1914.29	2711.4	2256.49	2797.83	2102.84	2558.22	3684.13	2625.18	2020.42	2174.83	3600.82	2193.48	3305.19	2240.92	2563.09	2194.17	2086.75	2689.94	2881.57	3905.49	1525.35	2598.76	2162.76	2464.56	3189.19	2571.84	2985.31	2119.97	2732.82
6930	3406.09	2166.7	2654.16	2952.72	3512.58	2355.68	2190.64	2051.56	2788.25	2919.75	3235.32	3094.43	3138.55	2946.16	1967.03	1888.18	2706.48	2229.72	2758.4	2045.31	2559.1	3664.63	2607.35	1978.4	2162.18	3591.88	2199.88	3250.73	2254.2	2571.69	2258.28	2075.42	2668.87	2943.6	3904.82	1531.13	2641.98	2128.43	2429.48	3167.61	2557.55	2993.63	2142.66	2701.23
6960	3428.2	2189.52	2628.6	3007.09	3476.12	2398.98	2180.42	2078.09	2763.5	2929.95	3262.59	3066.26	3116.27	2948.77	1983.04	1900.11	2711.84	2225.83	2818.37	2095.39	2524.73	3649.58	2616.88	2016.63	2196.06	3586.01	2179.66	3250.29	2267.08	2565.1	2201.6	2018.25	2707.03	2839.31	3861.55	1532.38	2643.64	2156.79	2384.71	3107.48	2577.84	3027.39	2116.41	2756.87
6990	3428.16	2150.44	2650.69	2989.07	3472.32	2325.76	2210.75	2130.83	2773.69	2936.61	3208.84	3091.13	3069.43	2952.81	2013.1	1883.06	2755.33	2225.58	2806.4	2118.62	2516.01	3728.39	2628.76	1957.09	2162.14	3575.45	2214.79	3282.79	2216.59	2575.05	2221.34	2084.95	2688.3	2836.33	3915.85	1528.25	2606.46	2160.81	2455.25	3185.02	2566.54	2998.76	2101.04	2673.74
7020	3466.79	2171.19	2617.6	2985.04	3520.32	2405.93	2180.24	2042.45	2745.04	2873.29	3279.35	3130.17	3097.88	2943.82	1978.98	1915.46	2796.5	2240.38	2769.52	2106.73	2538.31	3647.78	2632.1	1972.69	2198.22	3576.03	2196.16	3188.25	2233.95	2567.7	2217.61	2082.29	2728.15	2841.95	3944.97	1542.23	2693.95	2164.42	2475.41	3147.6	2534.44	2931	2137.11	2739.75
7050	3407.95	2185	2635.73	2990.98	3478.1	2378.17	2167.3	2057.53	2752.83	2915.95	3247.36	3040.83	3107.15	2936.06	2018.63	1885.47	2752.48	2231.2	2802.7	2077.77	2498.39	3736.63	2627.12	1966.24	2180.85	3603.86	2187.91	3238.05	2209.73	2561.68	2231.89	2118.63	2681.63	2865.93	3914.79	1517.65	2646.55	2195.75	2393.72	3165.22	2597.79	3018.64	2099.7	2726.17
7080	3413.3	2167.39	2632.52	2947.56	3509.86	2377.34	2219.06	2087.3	2781.49	2963.82	3245.4	3023.43	3133	2939.37	2021.48	1881.94	2714.48	2289.6	2803.9	2083.96	2490.83	3684.56	2631.63	1998.96	2149.4	3580.31	2182.11	3225.77	2279.63	2605.19	2282.06	2056.09	2741.18	2769.26	3901	1546.44	2601.57	2195.97	2424.93	3183.03	2565.18	2987.25	2092.53	2745.62
7110	3393.88	2186.05	2666.09	2987.14	3510.15	2386.44	2203.89	2068.97	2783.66	2911.61	3250.23	3093.02	3155.81	2902.03	1986.31	1909.97	2709.49	2177.73	2771.75	2074.02	2499.93	3654.68	2583.85	1985.24	2210.92	3604.53	2213.97	3304.29	2231.96	2606.27	2273.93	2099.6	2706.17	2852.44	3901.85	1529.85	2644.22	2176.63	2402.26	3157.46	2561.13	3034.06	2095.62	2737.38
7140	3431.16	2187.33	2643.9	2981.56	3495.75	2361.58	2194.58	2069.32	2758.04	2910.15	3272.14	3087.25	3103.86	2946.95	2014.97	1906.61	2759.5	2218.64	2795.15	2093.56	2556.03	3673.98	2633.72	1989.25	2166.38	3633.23	2161.29	3193.75	2211.72	2616.25	2197.81	2053.47	2744.24	2873.62	3879.66	1534.22	2615.16	2144.67	2432.82	3167.77	2599.39	2951.34	2105.65	2714.96
7170	3412.14	2181.07	2663.71	2975.86	3490.33	2354.35	2217.84	2063.17	2742.68	2914.51	3283.48	3049.01	3079.57	2957.27	1967.8	1911.82	2730.54	2214.48	2777.52	2067.95	2520.02	3661.82	2630.2	1988.31	2194	3649.45	2203.84	3227.59	2215.11	2549.95	2242.41	2035.21	2670.71	2926.94	3906.11	1526.7	2618.64	2164.49	2418.07	3161.63	2585.2	3018.55	2069.27	2726.37
7200	3468.05	2152.4	2635.71	2968.41	3471.93	2370.28	2203.24	2053	2840.94	2937.07	3277.68	3084.78	3139.28	2920.59	1995.6	1889.23	2761.89	2245.35	2831.13	2083.21	2534.25	3726.95	2596.24	1957.51	2197.9	3598.41	2209.71	3283.24	2266.81	2602.25	2187.09	2057.47	2659.13	2796.79	3979	1547.16	2662.01	2147.02	2400.84	3143.7	2544.95	3012.72	2121.32	2689.61
7230	3400.82	2200.31	2642.47	2999.52	3514.19	2374.18	2255.93	2046.14	2771.27	2886.38	3284.72	3130.08	3114.68	2950.01	2002.12	1868.34	2729.43	2237.18	2827.27	2077.87	2503.37	3690.18	2601.86	1980.85	2192.01	3607.88	2174.79	3277.35	2213.04	2591.51	2178.65	2048.77	2624.97	2853.53	3882.07	1524.79	2625.35	2173.5	2412.74	3178.89	2516.57	3037.81	2102.51	2722.58
7260	3470.44	2191.65	2625.25	3012.24	3500.88	2357.8	2207.29	2073.19	2780.13	2931.63	3308.46	3079.65	3125.41	2905.76	2004.37	1904.67	2759.72	2199.75	2779.69	2107.25	2504.63	3739.18	2644.44	2003.39	2221.98	3619.68	2155.55	3257.42	2276.03	2561.63	2230.17	2074.37	2672.17	2835.08	3890.52	1551.02	2618.25	2172.63	2382.03	3185.22	2486.19	2982.39	2120.91	2689.75
7290	3429.48	2206.82	2645.25	2988.81	3507.6	2353.04	2231.5	2089.89	2809.14	2943.36	3248.44	3074.13	3093.08	2957.02	1997.6	1919.83	2741.43	2230.73	2783.38	2112.93	2558.22	3735.02	2607.94	1987.93	2219.23	3573.3	2182.22	3261.68	2199.85	2541.88	2253.19	2034.2	2668.04	2907.77	3886.17	1535.75	2661.88	2126.05	2405.76	3144.19	2578.13	3016.45	2134.09	2722.01
7320	3424.96	2186.88	2598.51	3016.39	3512.61	2389.28	2228.36	2071.32	2826.45	2949.56	3271.63	3061.25	3066.34	2974.75	1995.69	1907.73	2790.23	2260.21	2772.15	2059.49	2530.44	3673.16	2642.23	2014.3	2209.48	3631.61	2199.26	3201.15	2267.77	2576.2	2265.05	2040.92	2650.58	2809.05	3892.46	1496.3	2635.63	2142.22	2445.93	3146.64	2544.95	2977.05	2152.61	2731.66
7350	3449.01	2197.81	2627.96	3004.68	3498.21	2370.37	2211.23	2073.01	2821.17	2935.99	3258.04	3098.64	3114.09	2945.57	2051.69	1891.1	2694.81	2260.08	2787.64	2071.72	2509.36	3715.32	2584.58	1962.95	2203.31	3585.78	2223.59	3220.58	2247.36	2541.39	2222.59	2036.28	2696.49	2832.43	3880.16	1542.64	2601.73	2171.9	2450.65	3198.61	2539.35	2983.83	2120.84	2661.28
7380	3428.8	2179.49	2632.99	3019.8	3507.77	2366.56	2231.29	2039.69	2783.29	2925.31	3255.7	3085.06	3133.66	2951.07	2044.2	1880.03	2745.76	2263.47	2778.93	2098.03	2560.51	3704.23	2574.63	1992.25	2223.29	3610.73	2215.78	3254.91	2199.55	2564.71	2245.02	2062.62	2682.42	2864.12	3884.6	1512.1	2678.76	2172.59	2431.06	3196.43	2608.01	2984.63	2155.3	2709.34
7410	3451.3	2134.26	2611.95	2991.1	3494.3	2370.28	2239.92	2056.16	2767.33	2932.81	3246.8	3072.89	3098.05	2926.42	2004.33	1919.36	2695.44	2221.4	2769.91	2123.15	2528.27	3688.46	2572.34	1990.13	2194.39	3601.93	2190.16	3282.98	2174.86	2591.25	2253.96	2075.09	2654.67	2807.11	3910.67	1513.41	2611.15	2125.64	2424.54	3223.64	2551.42	2939.98	2094.1	2679.13
7440	3410.87	2179.92	2589.43	2985.74	3533.85	2371.37	2234.33	2062.26	2749.47	2968.55	3238.56	3047.43	3056.68	2943.9	2017.93	1914.89	2753.3	2249.38	2798.88	2053.04	2536.98	3664.48	2621.3	2009.4	2177.9	3601.23	2198.15	3300.65	2209.66	2604.74	2250.37	2073.81	2658.26	2849.96	3906.76	1531.14	2588.82	2128.84	2461.68	3147.03	2536.47	2981.53	2096.97	2748.48
7470	3393.4	2169.32	2628.93	2997.56	3508.94	2359.64	2218.5	2076.88	2781.08	2908.52	3239.23	3100.54	3120.57	2966.01	1992.43	1929.64	2752.12	2207.53	2802.63	2112.93	2566.39	3694.89	2583.63	1995.85	2169.23	3655.6	2185.97	3277.4	2237.73	2588.67	2215.38	2033.19	2716.64	2846.68	3916.89	1531.08	2639.4	2114.11	2410.78	3125.35	2569.51	2986.32	2135.02	2707.35
7500	3434.91	2173.16	2642.36	2986.02	3502.41	2374.64	2206.16	2076.99	2740.57	2922.58	3246.76	3116.26	3152.44	2924.96	1982.64	1895.38	2712.72	2217.2	2818.75	2090.13	2499.93	3683.53	2585.95	2018.25	2202.28	3634.61	2150.32	3232.93	2244.1	2602.37	2259.22	2075.68	2699.28	2855.13	3924.96	1533.07	2639.33	2155.81	2455.83	3144.24	2587.68	2997.08	2135.09	2699.27
7530	3412.49	2167.61	2592.21	2989.35	3492.79	2401.73	2200.79	2084.4	2795.08	2879.88	3305.1	3118.99	3131.39	2925.41	1998.81	1905.84	2723.45	2204.13	2831.18	2065.24	2509.39	3631.09	2596.02	1973.98	2228.34	3629.16	2190.95	3290.02	2239.85	2569.52	2196.93	2069.13	2722.86	2812.63	3925.23	1522.76	2654.7	2166.36	2415.41	3224.02	2604.14	2991.07	2103.63	2691.45
7560	3396.71	2197.32	2637.06	3021.71	3493.33	2352.2	2157.16	2086.89	2764.54	2916.12	3267.13	3073.72	3112.54	2942.65	1990.41	1909.7	2771.14	2244.12	2763.01	2076.32	2549.8	3669.35	2598.25	2008.47	2193.06	3584.14	2179.57	3280.76	2194.2	2587.77	2187.21	2120.12	2689.35	2827.33	3949.11	1504.58	2637.65	2166.16	2461.2	3150.23	2560.06	2988.46	2084.63	2709.04
7590	3378.56	2181.43	2648.21	2999.68	3466.73	2387.38	2216.03	2089.89	2760.79	2940.24	3276.35	3002.17	3119.91	2934.99	2046.29	1832.76	2723.83	2238.15	2810.69	2091.36	2502.28	3728.54	2566.48	1987.31	2193.62	3607.6	2180.79	3267.41	2222.96	2586.92	2267.85	2098.37	2692.28	2916.6	3938.52	1539.76	2640.59	2167.88	2448.84	3181.05	2503.48	3014.86	2091.33	2723.22
7620	3372.03	2186.67	2637.05	3017.19	3485.68	2379.15	2176.1	2104.98	2753.44	2931.1	3306.58	3099.49	3085.91	2916.29	2032.9	1905.85	2743.94	2246.06	2769.5	2099.06	2502.54	3690.85	2614.62	1943.37	2212.98	3602.51	2159.32	3299.45	2263.2	2568.2	2184.89	2085.48	2722.44	2817.02	3914.62	1528.88	2687.71	2219.36	2414.55	3170.31	2555.99	2959.63	2120.6	2717.78
7650	3427.73	2168.85	2632.05	3030.13	3498.31	2334.01	2160.1	2037.59	2768.55	2943.25	3280.84	3040.27	3164.56	2941.09	2022.69	1909.85	2693.97	2260.9	2791.9	2074.85	2503.53	3633.97	2608.56	1985.8	2155.86	3621.77	2214.8	3213.07	2173.85	2583.51	2236.3	2069.39	2662.81	2824.05	3927.68	1540.03	2626.68	2219.03	2451.38	3119.69	2560.51	2986.96	2103.48	2766.51
7680	3441.7	2163.9	2609.23	2993.32	3495.59	2371.44	2193.35	2048.8	2791.21	2942.01	3244.68	3131.7	3112.34	2936.39	1985.79	1921	2767.69	2250.67	2783.78	2104.33	2521.84	3667.13	2619.16	1947.11	2190.36	3617.7	2219	3230.45	2228.01	2553.14	2220.36	2063.76	2705.39	2857.07	3905.75	1495.17	2630.28	2146.94	2469.43	3156.28	2547.71	2969.03	2092.15	2740.13
7710	3419.19	2158.53	2603.15	2995.49	3499.33	2417.04	2209.51	2086.15	2800.75	2962.94	3237.05	3055.34	3091.3	2937.52	2018.2	1895.27	2733.67	2227.21	2802.79	2086.83	2535.28	3711.26	2618.31	1978.28	2158.96	3630.48	2229.57	3244.74	2204.71	2595.91	2202.91	2080.09	2748.1	2846.1	3923.14	1508.7	2644.4	2196.71	2392.61	3155.61	2563.04	2993.03	2111.78	2695.29
7740	3412.5	2189.6	2594.92	2978.47	3506.17	2414.04	2216.18	2065.69	2801.91	2947	3244.13	3092.79	3098.46	2922.59	1994.02	1910.48	2708.9	2233.47	2756.59	2080.66	2516.44	3722.02	2605.41	1989.23	2219.13	3638.51	2201.41	3264.94	2204.32	2588.6	2241.5	2042.96	2671.71	2864.03	3909.75	1539.91	2653.01	2170.95	2411.45	3181.41	2563.18	3018.28	2121.9	2721.33
7770	3425.77	2171.53	2625.68	3029.37	3480.69	2364.41	2206.7	2047.6	2750.04	2940.89	3214.94	3044.46	3085	2937.17	2009.7	1885.71	2734.62	2219.12	2832.73	2063.24	2538.88	3733.73	2616.17	2038.71	2204.02	3606.18	2191.49	3246.17	2194.35	2610.64	2182.88	2075.12	2606.53	2886.21	3929.81	1517.25	2622.36	2129.58	2426.31	3161.69	2592.53	2976.04	2117.47	2683.41
7800	3428.73	2163.37	2614.99	3000.3	3529.89	2409.8	2208.44	2096.51	2809.51	2899.2	3277.09	3056.3	3088.25	2934.66	2009.45	1896.44	2747.38	2216.79	2794.38	2067.88	2525.36	3725.05	2586.64	1981.27	2202.57	3623.44	2199.12	3260.99	2242.11	2539.97	2216.14	2112.04	2674.26	2777.92	3887.55	1501.04	2638.92	2044.67	2455.57	3185.08	2575.38	3000.35	2099.23	2736.46
7830	3433.21	2168.72	2655.03	3010.21	3480.93	2366.66	2129.21	2115.84	2762.36	2926.69	3268.24	3052.02	3144.81	2934.27	2004.76	1940.95	2767.85	2218.82	2795.61	2117.57	2556.46	3661.31	2603.36	1995.2	2209.33	3594.34	2173.6	3280.69	2234.87	2584.84	2238.19	2047.16	2655.47	2862.82	3931.27	1535.47	2625.04	2156.04	2433.5	3174.63	2540.4	2939.95	2144.73	2692.4
7860	3422.32	2187.25	2640.53	3026	3523.33	2411.16	2223.64	2060.04	2773.15	2923.04	3280.1	3067.43	3126.51	2942.64	2007.65	1897.95	2759.5	2206.63	2774.38	2089.31	2519.26	3651.65	2569.62	1996.02	2176.63	3605.03	2204.35	3242.86	2252.09	2611.4	2198.56	2032.69	2679.84	2860.32	3929.8	1530.25	2595.66	2140.52	2451.93	3118.15	2546.54	2976.53	2137.06	2710.68
7890	3392.74	2183.57	2624.28	3009.1	3496.84	2410.91	2157.16	2093.84	2749.71	3003.04	3243.87	3086	3081.76	2944.75	2045.1	1903.15	2705.13	2228.44	2814.34	2139.63	2544.98	3686.39	2640.68	2002.39	2186.1	3600.69	2189.03	3261.3	2260.57	2536.09	2230.83	2051.72	2675.73	2844.98	3961.24	1545.36	2580.97	2192.99	2428.47	3182.02	2542.29	2995.45	2127.73	2721.73
7920	3466.9	2166.78	2606.97	2990.85	3480.95	2380.28	2225.58	2098.85	2734.53	2966.13	3236.38	3083.68	3127.35	2918.44	2049.73	1892.28	2787.46	2261.76	2811.93	2074.9	2537	3681.59	2584.66	1995.15	2169.78	3638.09	2212.84	3310.26	2288.04	2568.91	2282.65	2044.37	2643.47	2766.74	3911.71	1528.93	2622.2	2171.25	2442.58	3165.33	2621.45	2942.9	2112.39	2747.77
7950	3477.33	2177.27	2629.28	2998.63	3512.06	2398.62	2251.57	2117.98	2782.06	2907.61	3250.79	3077.83	3134.13	2920.58	1999.43	1939.74	2716.81	2204.53	2814.71	2062.44	2505.67	3679.48	2632.9	2017.19	2226.12	3588.34	2198.63	3342.59	2187.2	2586.93	2311.76	2053.68	2679.23	2802.71	3940.41	1532.61	2583.06	2141.12	2443.47	3165.01	2535.29	3002.16	2112.85	2656.77
7980	3401.15	2205.01	2620.15	3018.47	3533.93	2391.89	2192.84	2094.42	2768.48	2942.18	3266.59	3076.52	3079.26	2927.49	2003.89	1893.4	2767.08	2217.23	2781.76	2116.97	2514.97	3721.82	2617.87	1968.31	2173.49	3598.37	2196.23	3266.08	2276.11	2581.14	2254.97	2053.08	2694.4	2774.88	3919.48	1512.8	2583.16	2158.2	2456.89	3207.11	2534.26	3021.39	2152.39	2740.99
8010	3475.23	2165.49	2625.23	3006.83	3449.09	2372.11	2215.28	2051.09	2811.65	2880.64	3305.85	3051.92	3109.8	2941.44	1973.5	1919.68	2748.48	2221.72	2737.86	2080.76	2494.44	3707.48	2605.38	1987.37	2153.35	3588.92	2175.8	3334.9	2260.34	2565.62	2201.74	2126.28	2747.46	2845.56	3917.15	1529.74	2586.29	2144.4	2417.45	3164.56	2562.09	2990.63	2115.87	2698.32
8040	3454.69	2152.34	2603.3	2998.14	3497.36	2382.74	2231.58	2089.72	2743.01	2939.67	3280.3	3071.9	3109.46	2911.94	2000.8	1898.7	2773.73	2171.89	2736.53	2037.07	2506.15	3701.96	2624.69	2000.95	2184.41	3633.73	2209.84	3243.99	2223.22	2524.79	2206.6	2118.42	2686.07	2926.18	3928.83	1503.08	2634.93	2133.41	2419.12	3177.54	2507.34	2985.22	2095.65	2694.75
8070	3432.97	2172.96	2621.86	3022.27	3512.75	2412.19	2247.06	2069.31	2782.97	2924.76	3280.66	3058.43	3073.5	2956.92	1969.33	1914.27	2761.92	2266.08	2792.97	2077.34	2531.88	3721.72	2608.23	2007.96	2172.11	3575.06	2197.01	3296.9	2249.8	2566.57	2225.56	2085.22	2726.2	2814.9	3897.91	1497.29	2600.88	2137.88	2429.7	3198.01	2576.38	3010.31	2125.63	2659.51
8100	3429.97	2190.82	2636.72	2995.21	3505.02	2393.68	2200.51	2061.35	2770.05	2938.58	3215.78	3091.63	3097.11	2915.51	2044.57	1901.15	2778.05	2206.1	2767.36	2082.54	2488.86	3688.16	2627.93	1994.96	2216.55	3613.73	2223.89	3260.19	2245.25	2608.41	2219.32	2084.43	2754.43	2884.12	3968.95	1543.22	2621.15	2174.69	2468.15	3168.21	2521.54	2996.02	2082.81	2777.17
8130	3431.24	2188.85	2615.36	2953.84	3496.38	2400.96	2201.38	2076.28	2756.83	2881.82	3238.87	3117.1	3088.59	2939.26	1988.01	1884.22	2750.8	2224.17	2766.81	2073.39	2494.62	3700.06	2607.21	1969.78	2157.16	3607.05	2192.71	3271.63	2208.45	2561.97	2206.91	2074.86	2729.72	2815.16	3893.26	1533.62	2605.33	2167.65	2461.46	3148.22	2580.46	2944.69	2087.35	2706.04
8160	3475.17	2151.69	2635.97	3026.68	3481.81	2415.39	2225.82	2104.16	2738.23	2916.29	3246.33	3065.96	3081.45	2938.43	1982.02	1927.17	2717.21	2208.14	2810.78	2102.24	2548.49	3699.03	2634.36	2027.31	2172.52	3614.9	2168.35	3248.28	2263.14	2573.23	2255.65	2079.45	2705.22	2889.86	3920.28	1535.13	2604.02	2169.15	2493.54	3190.96	2543.87	2954.54	2113.92	2728
8190	3424.04	2148.78	2636.03	2997	3509.81	2419.37	2211.99	2079.87	2804.93	2938.95	3262.95	3045	3100.84	2930.4	1998.65	1895.99	2795.78	2256.3	2758.75	2080.18	2525.2	3698.49	2599.49	1994.57	2112.12	3608.18	2195.78	3243.85	2236.52	2580.74	2235.74	2052.88	2701.42	2806.04	3874.73	1526.89	2649.77	2184.16	2415.32	3146.33	2528.33	2981.34	2077.72	2662.86
8220	3372.86	2174.09	2618.09	3020.87	3470.33	2400.61	2217.17	2079.62	2793.52	2952.86	3225.79	3077.03	3087.87	2904.79	1997.4	1900.7	2759.37	2173.84	2795.85	2068.59	2517.17	3667.84	2600.06	1959.98	2164.47	3601.23	2212.28	3247.87	2241.3	2563.1	2234.93	2035.3	2623.2	2856.57	3886	1532.61	2660.98	2201.52	2410.91	3177.84	2605.3	2983.05	2105.51	2703.74
8250	3390.55	2191.22	2657.8	3031.91	3481.53	2385.83	2184.25	2095.7	2775.78	2865.48	3309.24	3061.94	3109.61	2926.56	1985.39	1912.09	2705.2	2235.6	2762.36	2077.94	2568.45	3657.96	2602.84	1949.45	2156.65	3610.39	2199.66	3293.22	2222.7	2570.51	2183.03	2059.67	2641.36	2863.63	3943.32	1495.81	2627.28	2204.09	2427.46	3158.7	2578.17	2990.19	2119.93	2627.23
8280	3416.54	2143.09	2632.26	3028.29	3502.47	2373.66	2162.66	2087.01	2757.01	2930.28	3271.03	3075.18	3061.47	2921.13	2073.05	1922.43	2721.35	2238.85	2818.09	2079.6	2545.06	3741.81	2607.4	2008.14	2172.94	3619.37	2195.57	3276.79	2244.67	2564.72	2202.52	2053.74	2685.41	2861.05	3906.79	1509.12	2638.81	2188.43	2446.62	3203.62	2599.46	2954.92	2123.88	2728.92
8310	3440.15	2184.7	2641.95	3023.65	3510.88	2401.36	2229.56	2096.36	2786.7	2958.55	3261.27	3119.71	3116.78	2940.92	2010.5	1897.05	2753.18	2250.73	2815.51	2100.58	2502.16	3746	2579.1	1981.71	2161.6	3615.6	2194.27	3299.21	2218.89	2564.99	2198.48	2004.21	2640.92	2880.95	3944.33	1517.72	2660.75	2138.94	2394.54	3139.65	2566.64	2974.88	2132.36	2794.21
8340	3389.64	2165.77	2627.6	3021.36	3528.9	2392.25	2201.66	2099.89	2773.36	2898.02	3223.2	3090.1	3131.43	2943.73	2003.99	1898.09	2715.88	2224.2	2796.62	2074.77	2538.42	3700.41	2638.87	1945.44	2182.87	3589.92	2200.24	3253.59	2280.57	2580.56	2232.03	2081.08	2656.94	2881.87	3883.83	1530.34	2586.42	2153.3	2413.08	3152.5	2536.01	2979.09	2082.36	2679.43
8370	3427.98	2152.2	2649.92	3049.45	3478.78	2353.14	2188.99	2130.31	2780.91	2928.58	3236.86	3104.27	3069.41	2929.7	2034.13	1889.16	2719.04	2278.19	2852.57	2100.21	2497.25	3651.45	2578.08	2029.62	2207.97	3613.2	2182.95	3282.14	2225.04	2551.89	2235.06	2025.1	2722.52	2792.04	3885.83	1524.79	2613.01	2142.78	2451.94	3090.09	2514.57	3000.27	2125.95	2740.76
8400	3453.19	2171.25	2633.92	2997.13	3524.84	2388.75	2188.79	2082.96	2768.9	2910.65	3298.15	3095.04	3117.5	2928.61	2009.34	1938.55	2738.28	2247.28	2815.23	2086.66	2515.66	3687.48	2605.14	2013.64	2201.47	3602.1	2170.54	3306.22	2218.96	2572.61	2235.66	2084.84	2674.46	2881.21	3916.09	1521.47	2628.81	2143.64	2434.62	3137.64	2548.98	2978.57	2141.4	2723.04
8430	3427.82	2169.58	2594.75	3006.13	3456.04	2371.13	2214.95	2096.08	2800.63	2939.31	3225.11	3067.63	3113.64	2961.06	1981.71	1893.44	2721.06	2230.41	2787.08	2051.52	2507.12	3691.2	2632.77	2004.08	2200.63	3603.62	2202.62	3242.04	2273.3	2550.96	2204.79	2104.46	2683.55	2864.93	3909.7	1545.9	2622.67	2128.55	2393.19	3162.5	2575.37	2988.57	2133.91	2778.19
8460	3414.81	2188.94	2628.06	3001.27	3484.31	2393.05	2198.19	2063.52	2742.9	2908.98	3240.21	3134.37	3076.06	2914.86	2024.33	1878.09	2768.79	2225.17	2815.23	2087.88	2456.26	3693.36	2599.16	2005.09	2213.23	3589.4	2188.2	3287.29	2212.12	2571.97	2244.5	2066.27	2684.94	2888.21	3895.61	1515.5	2658.65	2131.15	2440.61	3164.53	2545.57	2967.06	2121.02	2686.46
8490	3484.76	2200.76	2627.33	3018.98	3473.55	2375.27	2206.99	2156.83	2772.12	2930.99	3236.85	3063.48	3113.51	2950.74	2029.49	1921.82	2711.65	2245.26	2779.44	2087.18	2486.21	3660.55	2599.52	2016.97	2195.36	3582.38	2196.16	3256.6	2203.61	2581.5	2237.02	2059.12	2669.84	2824.33	3952.13	1509.12	2606	2114.57	2454.97	3138.37	2532.15	2974.02	2132.89	2764.2
8520	3446.87	2184.63	2608.49	2976.67	3511.9	2339.76	2230.88	2096.76	2748.68	2866.51	3204.28	3042.64	3087.15	2911.13	2039.25	1922.96	2757.76	2243.1	2773.66	2084.23	2498.51	3739.69	2632.04	1981.59	2203.46	3605.5	2184.22	3282.79	2260.03	2605.46	2227.16	2080.36	2699.22	2828.94	3890.72	1529.09	2608.39	2160.54	2391.72	3126.75	2526.02	2991.32	2162.54	2734
8550	3407.08	2152.2	2627.62	3032.98	3469.85	2358.92	2188.85	2080.2	2728.08	2910.15	3231.31	3042.9	3072.53	2948.26	2004.11	1884.75	2711.16	2183.12	2793.18	2089.86	2510.39	3713.13	2584.43	1984.94	2186.23	3597.26	2222.1	3293.44	2257.53	2580.38	2158.52	2067.27	2666.75	2790.09	3894.2	1542.84	2616.04	2137.74	2418.84	3203.44	2517.46	3048.71	2153.67	2748.07
8580	3404.98	2185.46	2613.17	3029.19	3489.89	2366.87	2217.59	2034.44	2780.86	2899.74	3242.06	3063.51	3101.12	2935.33	2028.09	1893.85	2782.23	2260.96	2814.56	2068.27	2513.86	3694.57	2590.51	1949.64	2191.52	3654.2	2182.16	3304.24	2212.36	2535.66	2224.01	2126.64	2715.44	2850.48	3900.6	1542.47	2588.86	2135.58	2444.92	3153.09	2504.85	3038.33	2065.39	2712.04
8610	3441.51	2165.01	2648.21	3010.61	3450.92	2356.51	2191.69	2106.3	2770.71	2906.01	3275.24	3055.26	3074.49	2916.51	2000.55	1905.46	2688.39	2243.59	2755.92	2108.93	2531.2	3678.13	2567.91	1963.47	2190.51	3615.19	2157.38	3319.67	2207.93	2571.81	2201.67	2116.39	2716.84	2830.92	3887.39	1493.47	2596.08	2141.02	2446.02	3125.32	2537.62	2975.47	2120.06	2711.39
8640	3369.31	2171.64	2628.36	2991.52	3519.38	2392.73	2226.52	2081.98	2770.02	2953.54	3293.87	3098.82	3121.05	2955.65	2000.43	1859.86	2779.61	2231.33	2778.45	2063.23	2530.76	3699.35	2581.62	1976.53	2142.29	3583.97	2186.42	3272.86	2263.65	2547.03	2181.74	2063.55	2680.77	2816.53	3913.75	1533.96	2624.29	2191.69	2410.13	3169.24	2567.02	2978.17	2076.54	2656.51
8670	3438.51	2188.17	2597.57	2995.23	3495.27	2409.29	2188.43	2079.13	2803.81	2919.98	3237.02	3124.18	3067.15	2931.29	2027.57	1920.35	2694.56	2196.98	2792.51	2083.92	2506.19	3630.37	2586.37	1998.22	2139.49	3598.76	2191.72	3232.82	2194.15	2610.23	2204.53	2090.14	2624.4	2859.82	3923.14	1522.38	2652.41	2175.14	2399.86	3152.45	2528.53	2984.89	2087.61	2711.75
8700	3326.85	2159.04	2593.19	3021.99	3506.39	2401	2184.18	2073.38	2776.73	2908.17	3242.6	3066.35	3130.79	2896.69	2012.02	1921.9	2759.2	2254.63	2854.3	2059.96	2556.49	3676.53	2646.25	1987.97	2165.34	3574.43	2178.26	3315.71	2227.63	2565.84	2177.99	2106.31	2678.76	2847.87	3910.72	1551.06	2652.89	2196.35	2425.24	3142.56	2578.97	2962.36	2094.01	2769.68
8730	3425.06	2188.41	2617.27	3005.43	3519.87	2381.17	2203.16	2071.01	2784.63	2941.56	3260.55	3057.88	3092.88	2880.08	2029.24	1875.65	2743.07	2246.28	2797.81	2099.03	2556.41	3671.77	2601.21	1976.1	2127.5	3558.62	2173.22	3261.58	2260.38	2561.65	2220.46	2070.45	2689.79	2860.89	3917.7	1538.38	2613.86	2183.89	2399.73	3155.71	2545.57	2996.4	2107.08	2701.12
8760	3399.78	2181.69	2597.7	2978.09	3532.82	2321.98	2214.27	2070.5	2782.35	2947.48	3262.75	3063.31	3120.39	2945.54	2005.39	1896.16	2742.84	2261.71	2787.57	2108.09	2542.08	3686.13	2613.69	1948.28	2138.31	3605.68	2204.51	3234.08	2246.64	2538.49	2187.38	2032.59	2642.66	2780.93	3910.92	1500.3	2593.5	2167.43	2418.15	3144.42	2569.47	2999.94	2122.45	2682.63
8790	3413.33	2158.7	2612.84	2968.85	3491.08	2368.69	2217.11	2060.17	2764.18	2926.24	3255.61	3076.69	3088.57	2952.15	1996.76	1898.91	2716.2	2211.47	2811.28	2109.54	2555.34	3656.98	2562.81	1964.88	2138.9	3619.78	2190.74	3272.74	2278.8	2580.61	2223.42	2038.62	2684.22	2882.75	3895.36	1516.01	2659.83	2205.52	2393.18	3124.67	2572.49	2988.5	2096.18	2727.71
8820	3454.34	2189.23	2599.12	2993.04	3484.59	2406.8	2181.06	2059.17	2772.21	3003.67	3214.24	3138.74	3078.6	2938.49	2025.05	1914.19	2770.62	2216.78	2745.05	2111.61	2557.51	3684.26	2618	2005.14	2138.28	3606.8	2168.88	3177.99	2252.5	2525.67	2196.64	1978.02	2696.67	2874.57	3910.86	1535.62	2631.75	2192.77	2421.82	3094.89	2569.06	3005.12	2123.03	2676.17
8850	3418.15	2143.1	2612.5	2989.78	3504.85	2374.59	2197.47	2059.04	2819.16	2899.33	3265.14	3115.4	3116.8	2944.39	2003.03	1906.7	2751.74	2261.26	2813.37	2081.44	2505.43	3730.87	2596.51	1996.12	2180.21	3618.79	2161.06	3283.39	2201.65	2562.78	2230.73	2055.5	2654.13	2915.5	3898.67	1501.37	2633.55	2155.97	2405.76	3150.14	2559.02	2992.85	2152.22	2782.36
8880	3435.45	2165	2609.06	2975.16	3496.63	2359.02	2164.58	2083.49	2748.61	2885.14	3220.07	3057.47	3121.02	2929.98	2009.02	1929.65	2751.39	2211.13	2847.3	2101.69	2485.76	3762.41	2587.85	1996.53	2185.45	3634.67	2195.91	3218.49	2207.17	2543.38	2202.96	2027.62	2663.16	2819.77	3956.95	1499.46	2656.23	2183.63	2402.84	3200.35	2618.75	2940.96	2133.77	2707.35
8910	3421.92	2206.7	2635.11	3029.99	3500.92	2382.3	2201.53	2064.45	2751.21	2915.83	3241.59	3100.6	3124.51	2924.02	2031.93	1891.52	2785.76	2255.21	2792.05	2068.94	2524.35	3656.91	2602.18	2002.24	2162.44	3611.22	2194.16	3263.32	2254.98	2587.79	2227.03	2054.88	2649.45	2746.23	3899.55	1505.03	2609.94	2129.78	2358.58	3137.98	2563.52	2990.8	2120.47	2714.38
8940	3403.92	2146.63	2636.25	3027.39	3490.21	2387.82	2153.72	2088.28	2790.52	2916.39	3261.28	3114.09	3145.9	2961.22	1968.67	1928.77	2711.69	2219.44	2788.81	2074.16	2509.75	3732.51	2584.31	1993.28	2151.44	3616.3	2190.41	3227.71	2239.11	2544.86	2238.93	2043.79	2596.49	2807.84	3905.97	1538.47	2657.02	2221.9	2392.09	3118.73	2596.28	2953.38	2135.71	2693.54
8970	3449.73	2178.32	2672.17	2997.04	3530.25	2383.02	2202.25	2071.62	2798.36	2908.32	3224.84	3077.71	3113.28	2942.04	1993.07	1852.11	2729.66	2218.47	2820.85	2076.67	2478.98	3763.07	2575.83	1992.31	2140.1	3610.18	2193.3	3290.31	2221.49	2588.66	2231.31	2070.75	2647.68	2800.89	3903.53	1511.88	2602.73	2207.55	2421.68	3104.61	2584.33	2965.77	2143.36	2701.3
	1	1	1	1	1	1	2	2	2	2	2	2	2	2	2	3	3	3	3	3	3	3	3	3	4	4	4	4	4	4	5	5	5	5	5	5	5	5	6	6	6	6	6	6
	1	2	3	4	5	6	1	2	3	4	5	6	7	8	9	1	2	3	4	5	6	7	8	9	1	2	3	4	5	6	1	2	3	4	5	6	7	8	1	2	3	4	5	6
0	100	100	100	100	100	100	100	100	100	100	100	100	100	100	100	100	100	100	100	100	100	100	100	100	100	100	100	100	100	100	100	100	100	100	100	100	100	100	100	100	100	100	100	100
0.03	100.913	99.1141	100.389	100.597	100.919	98.392	99.5984	102.06	99.7319	99.4275	98.2687	99.5578	99.7374	98.5306	100.253	99.8334	97.2725	99.8411	101.74	99.8614	99.5311	99.6369	99.6221	98.1374	102.551	99.7272	100.032	99.0655	101.186	99.6	98.4182	102.231	98.1241	98.4356	99.2908	102.35	101.232	97.958	101.988	99.0876	100.827	98.2604	98.8201	98.3419
0.06	98.9078	100.006	101.219	99.7129	100.16	98.233	98.142	100.303	99.7482	100.57	99.1607	100.443	99.232	98.7391	101.66	100.038	99.4921	102.807	99.4178	100.982	98.7356	99.1726	99.2909	100.053	102.345	100.485	99.474	100.534	100.487	100.464	98.0929	99.2257	99.4124	99.1413	99.9009	102.189	101.262	99.9199	100.968	99.2813	99.3651	99.0738	98.9229	99.8528
0.09	100.786	100.228	101.022	101.339	101.319	99.3094	99.7549	100.097	100.327	99.951	99.5584	98.8132	100.83	98.3758	99.3451	101.546	100.709	102.553	100.937	98.302	101.18	100.567	98.9739	101.613	101.01	99.9177	99.4283	99.2834	99.4709	100.86	99.2096	101.408	96.8537	99.5007	99.9538	100.829	101.379	98.0204	101.117	99.7341	101.009	99.3318	98.846	99.7794
0.12	99.6286	99.5944	102.571	100.117	100.748	99.8225	98.0757	100.763	100.145	101.532	98.3977	97.7433	99.2845	98.7378	103.25	100.184	98.7744	99.1478	101.882	98.3181	98.8623	99.9701	99.1522	100.984	101.092	101.227	101.756	98.9903	97.4495	101.137	100.837	100.485	98.1969	98.9605	101.091	101.979	101.979	97.4884	102.24	100.26	98.8854	99.8905	100.175	99.6142
0.15	99.9655	100.123	100.05	98.9916	101.93	99.1787	99.6009	99.4152	99.5787	99.9646	99.1322	98.7432	99.7651	98.8264	100.309	99.0501	100.065	99.8504	102.149	100.334	99.863	98.5713	101.726	99.9926	100.609	100.675	99.9644	99.4016	100.041	100.292	100.272	100.474	97.125	99.8389	101.006	100.69	101.695	97.7941	101.409	100.929	100.976	99.3673	98.7783	98.9548
0.18	99.2071	98.7823	102.368	97.6417	100.881	99.4337	99.1979	100.316	99.9879	100.55	99.3594	99.776	101.012	98.3987	97.8626	100.678	99.9626	102.709	101.892	99.9057	99.4917	100.303	99.2864	100.197	101.638	100.349	98.2501	100.274	99.5548	101.251	98.8449	102.137	96.719	99.2658	101.582	101.429	100.668	96.736	99.6604	100.522	100.408	98.7955	101.051	97.8529
0.21	100.822	99.9866	101.203	98.5903	101.043	99.8624	98.5168	98.8637	100.132	100.007	99.0618	99.5282	100.502	99.0726	99.234	100.895	98.6896	101.284	100.964	100.822	99.389	99.3194	101.068	100.521	101.522	100.446	99.1462	99.5497	98.664	100.547	100.054	99.1834	97.5645	100.421	100.176	101.771	99.1768	98.0957	101.442	102.247	99.7325	98.7386	101.173	99.7297
0.24	100.469	99.9822	101.004	99.2327	99.9391	98.4175	97.7619	100.814	99.8653	100.229	99.4643	99.4139	99.4407	98.4135	100.755	100.476	100.283	101.952	101.227	99.9265	100.962	99.7973	100.229	99.0804	102.166	99.9357	99.9675	101.166	99.8801	100.868	99.85	100.346	98.9925	98.8861	99.7643	100.757	102.052	97.3093	101.34	100.134	100.22	96.9365	100.787	99.9732
0.27	101.235	99.6412	98.657	99.5498	99.7676	98.5422	97.6366	101.333	99.4542	99.1722	99.618	98.5945	101.181	98.9333	99.2571	100.719	99.4972	101.109	101.373	99.8211	101.662	99.7413	100.755	99.0938	102.235	100.117	99.2961	99.6752	100.723	98.7874	99.6048	100.547	97.7515	100.887	100.436	101.142	101.479	97.5097	101.151	99.4147	98.0191	99.2211	101.22	99.8471
0.3	100.491	100.59	100.183	100.127	100.153	98.3604	97.3321	99.2245	99.0315	100.639	98.4985	99.3722	100.883	98.8917	98.8787	100.563	99.3865	101.141	99.0306	98.7813	100.83	100.392	99.5412	101.203	102.179	101.094	98.9363	100.837	101.082	98.2035	98.2595	100.773	99.8337	99.2727	100.508	102.786	101.418	97.8098	99.7944	100.183	99.67	100.499	99.5481	98.0019
0.33	99.6532	100.969	101.725	97.7954	100.67	99.9858	97.4825	100.175	100.287	100.85	99.1257	97.3495	100.52	98.8669	100.473	100.919	97.7504	100.051	101.676	99.5166	102.217	98.2025	100.372	101.011	103.044	99.1307	99.0058	100.952	99.0554	101.153	97.6665	98.2209	97.837	100.306	100.654	100.3	101.003	99.8467	101.06	100.764	99.1481	97.877	101.062	101.002
0.36	100.073	100.014	99.6895	97.9783	100.04	99.1787	98.0094	98.8402	100.178	99.9871	100.432	99.6491	101.33	99.0015	101.393	100.06	98.4619	98.8388	101.211	98.8729	100.142	99.1984	98.7885	98.6371	101.283	100.294	100.405	100.531	99.966	100.478	100.352	99.6906	98.7644	99.4243	100.95	101.967	101.361	98.5601	100.86	100.499	98.7135	99.5276	99.9623	99.3018
0.39	99.7523	100.981	101.625	99.2685	101.174	99.3547	98.6741	101.369	99.3332	99.9622	99.4807	99.0979	100.929	97.9155	101.942	97.726	98.404	102.133	100.387	99.1694	101.845	100.467	98.9182	99.4566	100.874	100.177	99.3352	99.7275	100.024	100.421	98.1839	101.486	98.3492	97.7856	99.7312	100.369	101.005	98.943	100.155	100.936	101.537	98.2515	100.67	100.47
0.42	100.004	99.6712	100.058	100.202	100.7	99.2608	100.01	100.552	99.4208	101.515	99.9122	98.7269	100.754	98.9769	98.2256	100.077	99.099	101.43	102.328	98.8948	98.6767	98.5043	99.3845	99.7447	100.709	100.335	99.7931	100.444	100.1	101.808	100.493	100.635	99.3446	100.711	99.9907	100.109	100.477	98.9793	101.93	101.039	102.49	98.5965	100.693	98.9679
0.45	99.9068	100.115	101.407	99.9352	99.8672	99.172	100.73	100.888	100.3	99.6404	98.9745	99.6632	102.586	99.4706	99.2721	100.468	97.6058	101.038	102.393	100.02	98.8417	99.2116	99.3998	99.5725	102.147	100.04	99.9406	99.6769	98.2463	97.7349	98.4952	98.7667	98.7454	99.0256	99.252	101.297	100.922	100.291	101.086	100.006	100.14	98.8944	100.644	98.5374
0.48	99.4893	100.098	99.0244	99.6058	100.46	98.1648	97.4947	101.645	98.4432	99.1958	99.9864	99.3449	100.057	99.0943	100.121	100.014	97.0937	100.697	101.152	98.5725	100.535	98.9449	100.921	99.8696	100.626	100.171	99.8152	98.6959	98.0322	101.266	99.1675	101.235	97.6133	101.623	99.877	100.267	99.7151	98.4174	100.785	101.327	99.7192	99.8953	100.419	99.836
0.51	100.543	101.154	100.875	99.4883	101.522	97.6417	98.453	100.13	99.9684	99.7709	100.267	98.9517	100.18	98.0563	100.477	100.804	99.2674	102.079	102.388	97.5978	100.556	98.9728	99.2437	99.1108	101.677	100.651	100.371	100.595	99.0817	99.1718	98.1213	99.8941	100.315	98.4405	99.7577	103.366	101.517	97.8476	101.025	99.4372	102.119	99.7606	99.463	99.5073
0.54	100.676	100.415	100.811	99.9197	102.252	98.3296	99.6824	100.678	99.0602	99.3691	100.68	99.4856	100.803	98.3333	100.213	98.2858	98.3418	101.937	101.085	100.605	100.875	100.112	98.5157	101.001	101.971	99.5952	99.8196	100.15	100.468	100.025	100.274	101.267	96.9117	100.231	99.7244	102.46	101.154	99.345	102.121	100.817	98.8665	99.9648	99.8842	99.4255
0.57	100.642	99.555	101.27	100.22	100.827	99.0245	100.851	100.725	98.9705	99.6383	99.2693	98.2035	101.491	98.6625	99.1327	99.9636	98.2097	103.169	99.78	99.1813	99.3916	99.1047	97.682	99.0561	102.352	100.425	98.7026	97.8111	97.1693	99.4287	100.123	98.5166	98.2112	98.6179	101.174	101.446	100.545	98.6176	100.262	99.7205	101.381	99.0354	101.074	100.671
0.6	100.47	99.4522	99.3396	101.067	99.7924	99.7552	97.7857	101.526	100.673	100.034	98.4631	99.7887	99.9609	99.1506	99.8494	99.4443	97.9082	101.467	97.7618	99.9587	99.0484	101.156	99.8077	99.0939	102.072	100.481	101.435	100.2	100.447	99.6911	100.299	98.7686	98.5499	98.9763	100.584	102.314	100.779	99.1731	100.101	98.7177	99.8589	98.329	99.6995	99.6702
0.63	99.8885	98.518	100.279	99.1633	100.805	98.3987	97.0387	100.362	99.3681	98.8154	100.079	99.5637	101.073	99.2697	99.0009	99.9811	98.822	102.187	100.647	97.8803	100.879	99.5184	101.302	100.553	100.468	100.146	100.121	100.459	100.822	98.9076	100.067	97.833	98.0041	98.961	100.201	101.494	99.3705	99.6444	100.955	101.004	99.0886	100.4	99.1283	100.333
0.66	101.292	99.1913	101.457	99.9297	100.114	98.5283	99.2798	99.5013	100.264	101.034	99.4168	97.2264	101.129	98.5905	100.426	99.6851	98.4974	101.24	103.139	100.735	100.122	101.234	99.0857	98.6914	104.013	100.506	99.9326	99.8125	102.355	99.7189	100.525	99.2424	96.7126	98.5329	100.038	101.785	102.176	97.7581	100.918	100.969	99.5993	99.4298	100.446	101.94
0.69	100.503	99.8764	102.361	99.7561	100.066	99.8778	98.852	101.022	100.163	100.893	99.4725	98.8507	99.6538	100.331	100.459	101.937	98.2145	101.635	101.95	98.0262	100.07	99.5423	99.377	101.891	100.246	99.5132	100.372	100.576	101.502	100.081	98.8642	99.3492	97.9184	99.4409	100.283	102.565	101.526	98.5849	100.763	99.0951	100.514	98.3642	100.394	99.7561
0.72	100.636	99.854	100.431	100.33	100.297	99.3943	100.229	101.582	101.284	99.0554	100.458	99.0531	100.163	97.664	99.7202	100.098	99.2632	100.974	99.8449	98.5186	99.2472	100.159	99.2155	100.26	101	100.512	100.079	100.101	97.9306	99.9205	100.126	99.4403	99.0455	98.1123	99.2171	100.622	100.939	99.2358	100.088	99.5553	98.2226	99.7599	100.787	101.805
0.75	101.043	100.266	100.435	99.5436	99.8933	100.257	99.8306	99.1863	99.9048	100.702	100.171	100.294	99.4808	99.0052	100.534	99.3543	99.7062	102.129	102.455	97.4819	99.2381	99.8012	99.0645	99.2511	99.5322	100.861	99.1737	100.448	98.8778	100.156	101.054	100.474	99.3662	98.5179	100.4	101.896	99.7854	98.2178	100.425	97.731	100.083	99.5538	99.5716	97.8386
0.78	101.019	99.8653	100.629	100.062	101.513	99.161	99.0642	101.037	100.59	101.042	98.2485	99.7375	101.068	99.2966	100.616	98.6851	100.333	101.764	102.053	100.422	100.538	98.619	99.9545	99.9399	101.907	99.9973	98.4182	99.4594	101.456	99.9791	98.8108	98.6097	97.77	100.959	99.5106	99.2816	101.671	98.0612	100.493	100.162	100.55	98.1112	99.1611	101.282
0.81	100.921	100.525	99.7944	99.7755	101.306	98.6331	97.2942	100.38	101.216	98.2525	99.1889	98.8404	101.074	98.9156	100.696	98.9096	99.8735	103.651	101.787	99.7361	101.393	99.0588	99.8636	100.202	102.696	100.718	100.603	99.9517	99.4372	99.5404	98.207	99.9487	99.1024	100.523	100.07	101.177	99.6875	96.7391	101.721	100.112	98.2622	101.954	100.821	99.1453
0.84	100.495	99.9713	100.632	99.1714	100.448	99.8013	97.0594	101.019	100.372	100.87	99.8621	98.6929	100.331	98.6976	101.742	101.958	98.8696	101.865	101.165	99.7728	100.223	98.8934	101.045	98.2826	102.402	99.9292	99.49	101.117	100.532	100.95	99.3369	100.132	99.8361	99.5743	98.8309	100.749	98.7819	98.7292	100.915	98.7009	100.886	97.2909	99.9474	100.685
0.87	99.9756	100.072	99.3133	99.6865	100.511	100.524	99.7512	99.4335	99.7829	100.074	97.9317	97.5005	99.3779	99	100.653	101.076	101.082	100.215	102.525	98.8562	100.815	101.23	100.206	100.277	102.071	100.937	98.7566	99.3521	96.8876	99.8079	97.38	100.761	97.8595	100.754	99.0446	100.486	99.2288	97.1239	98.6354	99.3238	100.91	99.0963	99.9836	100.111
0.9	100.831	100.006	99.8964	100.233	99.8489	100.082	98.9627	99.7249	100.825	99.2152	99.998	98.859	100.442	98.3897	100.313	99.5996	100.031	102.626	100.652	102.233	99.5632	100.494	98.4845	99.5217	102.764	100.5	100.241	99.7514	96.0891	99.7333	98.6025	100.653	97.0205	97.229	100.414	99.882	100.765	97.2804	102.411	100.183	100.233	99.6444	100.718	103.111
0.93	100.74	100.556	100.689	98.7929	101.009	98.8867	99.3677	99.9196	99.676	100.157	102.215	98.3731	101.619	98.4579	99.9018	100.469	99.7211	103.188	101.46	97.951	100.179	100.36	100.603	97.9748	100.266	100.505	98.395	99.4589	100.225	100.275	98.586	100.889	98.7289	98.0072	100.726	102.308	100.318	98.1624	99.3455	100.964	99.7392	99.2158	102.303	100.607
0.96	100.161	99.8805	99.6882	100.717	99.209	98.5125	100.595	99.5848	99.3315	100.338	99.8012	99.9074	100.225	97.6802	99.0653	101.699	98.2914	100.229	100.524	99.4704	100.352	100.875	99.0227	100.835	101.916	100.083	99.2934	101.167	100.335	99.714	100.47	102.596	96.3189	99.9451	100.138	102.936	101.51	97.5725	100.556	99.2521	100.419	100.092	100.487	100.485
0.99	100.225	99.5521	99.3324	99.7629	100.098	100.21	100.703	99.9272	100.728	98.9841	99.2884	98.3342	99.6523	99.1945	100.117	100.555	98.1306	103.173	100.649	100.524	98.9843	99.2453	99.8609	99.8134	99.874	101.394	99.0819	99.2337	99.159	100.795	101.743	98.9209	98.6626	96.5161	99.2671	101.615	99.852	97.2577	100.349	98.0682	98.6944	100.354	99.7135	102.772
1.02	101.398	99.1615	101.866	99.7514	100.729	99.0966	98.3119	100.43	98.1354	99.3791	99.8191	98.3284	100.98	98.735	99.5823	99.0721	96.937	102.362	101.438	99.2307	99.8817	99.0965	100.232	100.31	103.449	100.851	100.477	100.697	100.723	99.0235	100.025	97.696	96.0923	98.2924	100.544	99.7226	101.783	98.9773	98.6105	100.646	101.67	98.3392	100.224	101.299
1.05	102.597	102.083	100.995	99.5134	100.438	99.2384	99.8786	100.959	99.1607	100.097	99.3655	99.4394	99.0481	99.0477	99.3955	100.172	100.197	102.257	102.497	98.5491	99.0021	100.685	98.9992	99.0135	102.684	100.516	100.153	99.5439	97.9175	100.587	99.4695	100.219	96.6029	98.9813	98.7797	101.482	99.7243	98.4213	100.678	99.6932	98.9301	98.8822	102.358	99.8627
1.08	100.277	99.5591	101.126	99.7575	99.4755	99.3592	99.424	101.07	99.8022	100.521	98.4285	97.9142	100.319	98.9769	100.053	97.6358	100.313	101.843	101.238	99.3396	101.187	99.8913	99.3535	101.007	100.826	99.8128	100.547	99.1583	97.1562	100.618	99.9065	100.918	96.3607	98.6521	99.8827	100.791	100.874	98.3798	100.891	100.829	100.142	99.8206	99.0708	101.123
1.11	100.207	99.8539	99.8213	99.6067	101.201	100.153	100.449	99.8429	99.6928	99.804	99.3217	97.2507	100.297	98.3881	98.9074	99.9255	98.5157	101.263	100.957	98.0959	99.6555	99.9744	100.193	99.6617	100.795	99.6419	100.467	99.6438	99.6309	100.938	96.8575	99.594	96.6367	99.0271	99.4099	101.488	100.901	97.6559	101.93	101.358	101.072	99.3084	99.795	100.95
1.14	102.687	99.4359	101.281	99.9208	99.5029	99.0248	99.5937	100.94	100.675	100.004	100.439	98.9293	100.531	98.4626	100.127	100.371	98.2317	102.095	100.74	101.166	100.198	100.62	98.9253	99.5072	103.253	100.673	100.117	99.694	99.8413	99.7937	99.4012	98.213	98.3118	98.2655	100.573	101.201	101.453	97.2823	101.875	102.14	97.9169	99.0685	99.1042	99.4398
1.17	100.515	100.684	101.004	99.379	99.6695	100.682	98.7633	100.117	100.706	99.3655	100.048	97.5283	101.218	98.2376	98.1032	98.3392	99.4183	102.02	100.922	99.1065	100.313	100.284	99.9999	102.052	100.286	99.9184	99.6863	100.214	103.002	99.0772	99.3514	99.0187	97.9543	98.7337	100.335	101.095	99.734	98.3332	100.834	98.8322	99.9007	99.3463	99.895	97.814
1.2	101.142	99.6772	101.663	100.249	100.285	99.8212	98.9856	104.247	100.881	98.9686	99.8216	98.344	99.8934	98.414	100.651	100.025	97.8503	100.652	100.579	100.498	102.379	99.8238	98.6057	100.768	99.4412	100.643	99.7451	98.8203	99.989	99.0403	98.5325	99.9341	97.8861	100.258	100.102	101.352	101.949	98.4771	98.9346	100.848	101.983	99.6471	100.243	98.1004
1.23	101.603	100.533	101.613	99.7661	99.3264	100.117	99.5811	99.1133	100.279	100.908	97.8186	98.3108	100.978	98.6416	100.089	98.2995	99.8565	100.513	100.079	100.977	101.557	99.2469	99.0994	98.391	101.473	99.9198	99.9075	100.959	99.1463	98.8673	99.5756	101.428	98.8038	99.0866	99.8238	99.7823	102.581	99.0847	100.06	99.4993	100.371	97.2371	100.232	99.1617
1.26	100.441	99.9458	101.333	99.5042	100.989	98.148	99.8149	98.3341	98.0818	99.5792	99.9792	99.697	99.8094	98.2397	100.546	99.7994	97.3994	101.866	102.515	99.0086	99.8037	100.056	99.843	100.358	100.45	100.357	98.5211	100.374	99.1423	98.3956	98.0516	99.6181	97.8243	98.1476	100.546	100.618	101.432	97.3465	99.9235	99.9567	99.7218	98.5975	100.397	99.1621
1.29	100.595	99.1692	102.007	99.0712	99.5655	98.4612	97.3624	100.22	100.771	99.3631	99.1292	98.2305	99.8399	98.0772	100.354	100.977	100.816	101.581	101.053	99.9367	99.2408	99.7546	100.293	98.4168	101.408	99.998	100.698	100.293	97.5119	99.9901	98.6528	100.026	98.772	100.323	100.44	100.413	100.516	98.8964	100.962	100.153	97.0787	97.5468	100.411	100.872
1.32	101.565	100.149	101.355	100.342	100.552	99.0041	98.4133	98.98	100.255	99.4507	99.7537	99.6275	99.5928	98.7874	98.2518	99.7001	98.0794	101.353	100.951	99.3781	99.3946	98.8881	99.0848	98.3353	101.745	101.015	99.8034	100.55	100.583	99.2905	97.7038	99.8275	99.2017	96.7822	100.391	101.186	101.772	99.3076	98.8422	101.653	100.511	99.3554	99.7482	99.3255
1.35	101.579	99.1069	100.59	99.2221	101.027	100.152	97.0116	99.2628	100.456	100.506	99.6211	98.268	100.191	98.6914	99.3307	99.7124	98.9134	101.382	99.122	98.9214	98.155	98.6595	99.5726	101.273	101.532	99.8745	101.139	99.3879	99.7969	99.9207	99.998	100.183	99.5848	97.3939	100.018	101.43	100.318	97.0939	99.385	101.548	97.8906	98.7573	100.525	98.2113
1.38	101.842	100.857	100.158	100.36	101.823	98.974	100.084	100.161	100.364	98.1376	98.5115	99.1882	102.106	98.9644	98.837	98.7883	98.5549	100.558	101.779	99.5387	99.162	99.8753	100.115	97.5494	102.142	100.183	101.409	99.8076	98.7245	99.284	98.1934	101.73	100.444	98.5533	101.473	100.396	100.967	98.4171	101.232	101.15	100.422	98.8607	99.2767	98.5622
1.41	101.565	99.595	101.259	99.1935	101.172	98.778	97.9715	99.6612	100.49	100.976	99.5951	97.6944	99.8234	97.5977	99.4647	98.8229	99.6274	100.099	102.583	98.6293	101.17	99.4435	98.9534	99.7544	100.163	100.339	100.053	99.9521	96.5289	99.458	98.1523	100.976	98.9908	100.219	100.438	101.425	100.005	98.3998	99.6392	100.038	99.5665	98.215	100.789	99.3215
1.44	101.309	99.0194	101.123	100.588	100.772	99.5908	97.1145	98.6597	100.275	98.4227	100.275	98.6605	101.72	98.7826	99.3299	98.4382	99.7537	101.716	102.468	100.389	101.269	100.779	100.468	101.099	100.216	100.354	100.362	99.5462	99.7973	99.1924	100.28	101.781	99.2098	99.524	99.9866	100.54	100.545	98.997	101.311	99.6588	98.9983	99.5472	100.042	101.562
1.47	100.284	101.161	100.324	99.7803	100.276	97.9953	98.0383	100.159	99.0084	100.775	99.4841	99.4964	101.19	98.1182	100.266	98.9486	98.0438	101.848	99.6276	99.0914	99.8072	98.837	99.0949	100.135	100.124	98.3306	100.922	99.203	98.5274	99.9992	98.2251	100.976	97.7394	97.9851	100.476	101.566	100.035	97.4846	100.383	99.4054	100.771	99.6029	100.517	101.397
1.5	101.124	98.6891	100.484	100.713	99.809	99.0103	98.8853	100.959	99.2074	100.827	99.5122	97.09	99.7045	98.545	99.2849	99.8396	98.8925	100.115	102.031	99.5666	99.6709	99.7064	99.9243	99.6529	101.004	100.429	100.237	101.428	100.826	100.676	101.819	99.9084	97.2397	98.5493	100.599	100.575	101.075	97.099	100.937	99.8872	99.8788	98.5128	100.703	98.8687
1.53	100.414	100.436	99.399	99.7836	99.9951	100.278	97.8961	100.432	99.9078	101.359	99.411	98.7912	101.109	98.0787	98.4236	100.86	98.9595	102.041	101.555	98.4961	100.519	100.125	98.933	100.527	101.627	100.039	100.661	98.907	100.964	99.6924	100.525	100.948	96.039	99.221	100.042	100.49	100.93	99.4763	101.505	100.683	99.7701	98.784	100.26	99.5796
1.56	100.124	99.9265	100.778	100.295	99.404	99.1843	97.6398	100.154	101.674	99.4479	99.5358	97.6607	100.914	99.3862	99.8509	99.2873	98.5432	102.34	100.106	99.0041	99.6271	101.955	100.079	99.5135	102.035	100.321	99.7693	99.4752	100.544	100.478	99.8342	100.158	96.3558	98.3075	100.082	101.921	101.174	98.4166	100.304	99.4867	100.301	99.3808	100.992	102.098
1.59	101.414	101.027	100.133	100.082	101.07	98.6499	98.1358	100.894	99.2264	99.8675	99.9015	98.3449	100.795	99.1616	97.8448	98.7428	99.6436	99.7161	100.804	98.4569	101.127	99.9712	99.213	99.3161	102.829	100.217	99.0917	98.9177	100.942	98.7691	98.5173	99.4426	98.7501	99.4644	100.342	102.862	100.842	99.8876	100.086	100.092	99.0496	99.459	101.626	100.759
1.62	101.253	99.9406	99.572	100.661	100.766	99.751	99.8269	98.8973	99.4356	98.9924	99.8242	100.037	99.0761	97.9053	99.0172	99.5763	97.6735	101.786	99.7251	97.4164	101.997	99.4014	100.875	100.476	101.834	99.7353	100.728	100.057	101.1	101.433	101.201	96.7183	98.2047	97.5622	101.083	102.251	101.403	97.0419	98.9682	101.079	100.932	100.568	99.3145	98.4775
1.65	101.881	99.98	101.704	99.1711	100.042	98.953	98.015	99.382	99.1979	99.027	98.8294	99.415	100.545	98.8897	101.353	99.6863	97.4096	101.613	100.977	100.466	100.497	99.8297	99.4808	98.6196	98.9768	99.3979	100.13	98.7691	99.9664	100.231	102.124	99.7369	98.0528	99.9737	99.4056	102.503	99.8509	97.1678	100.656	100.564	99.3525	97.1096	98.6667	99.3731
1.68	102.095	99.9166	100.324	99.3392	100.938	101.055	101.828	100.211	99.1419	97.5473	100.739	99.1569	100.581	98.654	99.7165	100.231	100.987	101.505	102.181	98.0866	100.942	99.0538	98.9593	100.098	102.897	100.012	100.723	100.075	99.141	102.902	97.1573	99.675	97.3237	98.6061	99.3808	100.509	101.376	99.5671	100.783	99.6289	100.089	97.7935	98.7949	100.506
1.71	101.27	100.045	101.612	99.7487	100.618	98.426	100.185	99.9146	99.3989	99.8837	100.673	98.7653	99.4906	99.25	100.402	99.6205	99.6694	102.64	99.673	98.254	100.858	98.3556	99.7188	99.2086	99.5376	99.5955	100.138	99.0764	98.9287	98.901	97.9942	100.697	99.4607	100.175	99.9041	99.6706	100.591	97.9926	101.331	99.7092	100.633	98.6877	100.976	99.641
1.74	100.214	99.1172	101.02	99.6436	101.136	98.8616	100.416	99.4826	98.9957	100.976	98.6192	98.8983	102.411	98.4378	101.195	100.932	99.2722	102.694	101.673	97.6931	101.323	98.9202	101.951	99.269	101.436	99.6206	99.8565	99.3509	102.52	99.3145	97.2826	100.988	98.1221	98.7166	100.317	99.9977	101.393	96.9019	99.9137	98.4887	98.3345	98.7103	98.2778	100.299
1.77	100.628	99.5947	99.5736	98.3538	101.571	98.2097	99.6373	98.6605	101.646	99.6083	99.8225	100.769	101.098	98.5199	100.158	100.323	98.7344	101.429	99.6436	101.236	102.68	99.862	100.421	99.769	102.984	100.633	100.444	99.3827	101.45	99.3531	98.5611	102.104	100.035	97.7996	100.398	100.85	100.654	98.6653	99.4326	99.8786	100.625	99.2789	99.8828	100.332
1.8	101.592	100.961	101.334	99.5186	101.253	97.2955	100.288	100.249	100.799	99.9181	99.0209	99.3148	100.894	98.2723	101.118	100.641	100.339	101.437	101.428	99.326	98.9993	98.9648	101.276	98.6538	100.611	100.339	99.377	99.9578	100.789	100.863	98.2953	103.704	97.649	99.4961	101.221	101.891	101.171	99.0683	99.8949	98.9724	101.86	99.2431	101.608	99.5722
1.83	101.079	98.5824	101.558	99.4811	99.5598	99.2344	98.6351	98.3902	100.767	100.608	99.2304	99.5615	100.88	98.4649	100.733	99.8759	100.227	99.9872	101.687	100.11	99.5861	98.7404	101.067	99.1099	102.263	101.367	99.098	100.096	100.068	100.605	99.791	103.532	100.078	100.869	99.2729	101.157	100.689	97.4524	100.663	101.341	98.0279	99.0463	99.4196	97.9075
1.86	101.445	99.5019	101.201	99.1788	99.9685	98.8079	100.141	98.5093	99.0653	100.1	99.2774	97.9242	100.355	97.885	99.7361	100.589	100.599	104.032	101.685	98.6244	100.147	100.354	98.846	101.705	98.5779	100.307	99.541	99.2592	101.258	100.507	99.8921	100.681	100.648	100.288	99.1222	100.5	101.579	96.5104	100.904	99.4883	97.5585	97.4443	100.831	100.716
1.89	100.26	99.1155	100.039	99.409	100.581	98.8489	98.5516	100.421	101.488	99.7626	99.7969	98.2603	99.7668	99.5416	99.8445	100.702	98.8752	102.738	101.345	97.3834	98.1011	100.128	100.137	98.6663	99.7328	101.026	99.6019	100.983	98.5543	99.2824	98.8077	99.7515	99.3378	97.0463	100.37	100.052	101.386	96.8577	100.491	99.1157	100.385	100.402	100.454	97.943
1.92	100.782	100.708	101.027	101.136	100.444	100.06	97.7451	101.5	99.6098	99.9173	99.9426	98.8033	100.995	99.3395	99.2805	98.8561	99.7826	103.882	100.811	98.9895	98.739	100.172	98.9142	100.744	100.519	101.083	101.34	99.8847	98.2712	98.4612	98.9911	100.251	97.9011	98.9912	100.126	101.927	100.991	99.3012	101.48	101.169	100.369	99.3424	100.096	100.116
1.95	100.25	101.562	102.37	100.682	99.7938	98.9382	100.239	98.0805	99.619	99.4741	99.7284	98.9252	99.8923	98.5162	101.125	100.37	97.5487	100.46	100.313	99.9041	100.006	99.1355	99.0913	99.5734	99.6337	99.651	99.1326	100.514	97.4826	100.088	99.1456	101.603	98.4514	98.2358	98.6806	101.121	101.463	97.9967	99.9036	99.0231	100.496	99.4185	100.427	97.6624
1.98	100.43	99.891	102.321	100.124	100.426	99.7471	96.767	99.9521	99.7259	100.014	99.3785	97.3111	101.186	97.8157	98.0903	100.67	99.785	102.134	101.557	99.9479	98.851	99.8342	100.15	100.812	103.193	99.1399	98.8821	100.507	101.107	99.3863	98.9873	97.8989	96.5416	98.4888	99.6879	100.589	100.559	99.2258	100.152	98.8702	100.448	98.4359	101.722	101.13
2.01	101.024	100.694	101.256	97.4893	99.2643	99.5704	95.8404	99.9903	99.7343	98.3796	99.1691	97.8919	100.703	98.4029	100.555	98.6157	100.321	102.902	100.681	99.7228	99.8047	100.102	97.694	101.774	97.9866	100.912	100.198	101.122	98.3695	98.6403	100.92	101.953	97.2687	97.6329	100.416	100.837	100.557	97.3798	101.004	101.014	100.102	96.4065	99.5132	99.9579
2.04	102.232	99.4297	100.832	99.5759	101.192	100.691	97.6036	98.3023	100.832	98.8205	100.073	97.7621	100.044	98.5395	99.6115	100.521	98.7303	100.431	102.358	99.4607	102.179	99.0039	98.6833	99.096	101.417	100.222	101.492	99.3407	99.9529	99.6938	99.2366	97.0319	95.1648	97.6121	100.16	101.116	99.9005	99.2363	100.719	99.8301	101.967	98.9234	101.91	99.8713
2.07	100.954	98.6205	101.505	99.9939	101.673	99.8502	98.4136	100.289	99.0665	101.13	100.597	98.9118	100.372	98.665	101.729	101.035	98.6709	102.525	100.505	98.2574	101.113	99.0611	98.7763	101.395	101.355	100.384	100.264	99.9421	98.8665	100.786	98.3478	98.6986	96.9537	97.7792	100.971	102.737	100.919	97.9863	99.8013	100.968	99.3662	99.1642	100.387	99.5607
2.1	100.876	100.582	100.224	99.1782	99.5544	99.1353	96.7291	101.296	100.018	100.891	99.1153	99.4611	100.159	98.0567	101.066	99.4001	99.3695	100.78	101.941	99.7647	102.498	99.674	98.5457	98.745	100.892	99.9571	99.7852	100.412	99.7124	98.3948	99.615	99.6463	96.8361	100.912	99.9321	103.545	100.976	98.338	100.971	100.576	99.5144	99.3823	98.6951	99.579
2.13	100.654	100.383	100.679	99.1043	100.547	99.1207	97.5917	98.4665	100.195	99.2029	98.9079	99.5704	101.078	98.1034	100.722	97.7486	97.6253	102.642	101.661	98.6957	100.904	99.5767	98.8581	99.2156	100.881	99.257	99.2307	97.6983	99.5394	99.462	99.3625	100.695	96.9224	96.8475	100.302	99.8649	100.44	98.2188	98.9637	100.515	100.826	98.8653	99.7051	98.4539
2.16	100.474	99.0305	100.663	98.9934	101.14	100.479	97.1577	99.4833	100.052	100.36	98.6664	99.2524	99.6221	98.5268	98.7476	100.444	98.9923	101.104	102.53	98.5585	99.6177	99.5851	99.5035	98.5463	102.502	100.239	100.156	100.536	100.74	101.018	98.5576	100.218	99.3583	97.0889	100.76	102.093	100.95	99.3088	100.704	98.3489	100.434	98.3502	100.58	100.037
2.19	99.9434	99.8707	100.028	99.0837	99.4322	98.5287	97.1216	100.401	99.6477	99.2753	99.6854	99.6018	101.058	98.339	100.462	100.738	99.6536	99.7907	100.658	99.2528	100.03	99.6928	102.014	98.5583	100.826	99.6563	99.1853	99.6343	100.174	99.4474	97.5075	101.616	100.121	99.6158	100.167	101.038	101.663	99.3218	99.3232	99.2672	100.603	100.106	99.0628	100.564
2.22	100.037	99.285	100.588	101.453	100.703	98.7557	96.7504	100.621	99.1878	100.841	100.509	100.346	101.696	99.3544	100.898	101.254	98.3689	100.664	100.702	99.8549	98.0556	99.3417	98.5419	99.97	100.708	100.555	99.8677	101.232	102.813	100.13	98.1068	101.753	99.632	97.0986	100.635	99.4578	101.825	99.0708	101.841	101.272	99.9803	98.9179	99.8901	100.071
2.25	99.0027	99.4622	101.36	98.3619	100.24	100.134	100.234	99.8132	100.625	98.3936	101.039	99.9936	100.657	98.3288	102.072	99.0225	98.3432	99.7336	99.6282	100.383	97.7888	99.3274	99.1269	99.9221	100.43	100.074	99.0223	98.6793	99.1439	100.258	99.9294	100.488	99.4669	99.3983	100.149	101.916	100.175	98.6547	98.6677	100.328	99.9217	97.0842	98.4473	99.8653
2.28	99.3848	100.623	101.032	99.265	100.347	98.5666	98.4775	100.773	100.945	98.8106	99.7303	99.5542	101.001	98.8065	102.069	101.04	99.2733	103.505	99.4648	100.429	101.069	98.6689	100.806	98.9228	99.8666	100.247	100.252	100.515	100.162	100.356	98.8363	100.84	99.9269	98.067	100.87	100.811	100.937	97.6053	100.403	99.0459	100.715	99.3631	100.99	100.091
2.31	100.72	100.848	101.268	98.1357	100.972	99.0931	98.7892	99.1039	100.905	100.101	98.9583	101.182	100.612	98.6472	101.412	99.6845	98.4994	101.163	100.719	101.943	101.192	98.9543	100.801	99.2311	101.062	100.527	100.738	98.7958	99.0646	99.5286	99.4385	101.289	98.6091	99.4124	99.5385	101.15	100.625	98.2496	101.924	99.1371	99.4436	98.4925	101.859	100.691
2.34	100.161	100.097	101.459	99.4666	99.9828	99.6738	99.5718	101.109	100.828	101.193	99.5994	99.3665	99.4859	98.9197	101.037	99.2511	98.8913	101.109	101.181	98.8285	97.9835	101.013	98.8692	97.8676	100.937	99.9701	98.6252	100.344	94.5497	100.429	100.569	100.246	100.046	99.3789	100.349	101.76	99.8001	97.5502	101.127	101.208	100.65	99.0528	100.558	101.498
2.37	100.821	100.056	101.371	100.655	100.65	97.7948	99.2288	99.0902	98.2797	100.971	100.171	98.5152	100.33	98.2445	100.09	98.8558	99.9581	102.315	100.912	100.54	98.4047	100.349	99.2026	98.4957	100.315	100.036	99.0628	100.822	99.429	99.0454	101.23	100.044	96.9373	98.7312	100.65	99.8487	100.892	96.8998	102.906	99.5017	98.5385	98.5337	100.339	99.8768
2.4	99.8451	99.504	100.34	98.0248	100.654	99.4676	100.528	100.923	99.3321	100.683	99.7913	99.3686	101.319	98.317	99.3153	100.134	99.4756	102.448	101.42	97.5041	100.554	100.284	100.499	99.3638	100.572	99.3886	99.0227	99.7551	97.6432	100.071	100.453	98.3988	96.8691	98.8515	100.741	100.352	100.993	98.0738	98.8065	99.7206	100.319	99.0435	100.399	99.8755
2.43	101.154	100.403	100.631	98.0526	99.2869	97.571	101.893	98.7074	100.299	100.073	99.3682	98.346	101.67	97.9902	99.5492	101.133	100.234	102.548	101.327	99.373	100.136	99.2271	98.831	98.447	101.623	100.306	99.4465	98.6227	99.0459	98.781	100.908	101.295	96.8152	98.8632	98.8357	101.43	100.314	98.3836	101.547	100.62	99.8203	100.362	100.834	100.522
2.46	100.234	100.436	100.656	98.8459	100.104	98.9296	100.113	102.777	99.3147	100.236	99.9714	98.9706	100.817	97.926	97.1313	99.3873	98.894	101.097	100.385	99.3648	99.0743	99.7907	99.7692	98.385	100.256	98.2626	100.798	99.877	99.7255	101.725	100.741	96.0935	96.7658	100.311	99.914	100.896	100.287	97.1857	101.79	101.01	98.8503	99.8854	99.8742	101.797
2.49	101.554	99.25	100.565	98.8231	99.4525	99.9734	101.286	99.817	100.225	99.9115	99.1113	98.5793	100.379	97.4828	98.8059	100.602	98.6615	100.568	100.324	98.9232	101.487	99.8836	99.5093	98.5184	102.665	100.132	101.929	101.477	98.2112	99.7265	100.732	99.611	98.518	97.9731	100.872	101.29	101.903	97.714	100.696	98.5799	101.011	98.4567	98.109	98.7437
2.52	101.862	98.4212	102.354	100.462	100.705	99.1008	98.9274	98.8289	99.08	100.169	99.4735	98.3333	102.524	97.8127	100.796	101.905	99.6483	101.031	101.119	100.367	100.902	98.7216	97.7518	101.11	101.872	99.9141	101.382	100.082	100.047	98.9723	99.3907	98.8115	97.613	97.0095	99.7416	99.219	101.002	97.3613	100.606	101.432	98.0114	97.1599	99.6988	98.5465
2.55	100.37	101.275	100.647	99.9432	100.49	98.4882	99.9591	99.9325	100.027	99.4464	98.4202	99.2814	101.134	98.3016	99.5069	100.168	98.2051	102.224	102.307	98.2333	101.994	99.8718	100.219	98.4423	101.755	99.5895	100.688	98.7585	100.238	99.9554	100.679	98.8319	97.9673	101.025	100.841	100.585	100.743	99.4481	101.781	100.428	98.4169	97.6602	100.537	101.449
2.58	100.092	101.079	100.805	99.3866	100.641	97.8579	98.2733	100.854	99.5326	100.09	99.3865	99.2778	100.173	98.1611	100.509	100.571	98.5027	102.243	100.806	98.9486	99.9749	98.0691	99.8179	100.338	101.844	99.6401	99.1573	100.437	101.686	98.6965	99.0836	99.1087	99.0766	99.241	99.3211	100.999	102.063	96.8753	101.038	101.466	99.9676	98.5019	99.6013	100.24
2.61	101.338	99.7181	100.038	100.543	100.137	100.34	97.4149	100.257	100.033	100.773	98.7035	97.6241	99.7077	98.8376	98.9121	98.6661	98.7093	101.205	101.769	97.6827	99.3603	99.4891	100.82	101.197	103.208	99.5903	100.887	100.182	99.124	100.679	101.165	100.252	97.5164	98.5393	100.309	100.105	102.035	98.9428	98.2389	99.9776	100.139	99.1491	100.075	99.2796
2.64	100.166	100.54	100.405	98.9305	99.5086	99.1015	96.8265	99.3611	100.692	99.6645	99.362	98.6536	100.235	98.8014	99.4388	100.903	100.144	100.153	101.149	98.5697	99.8993	98.8505	98.8943	99.8018	101.158	99.8214	100.717	98.107	100.175	100.186	98.8802	99.0418	99.0808	100.885	100.073	101.804	100.608	97.674	101.668	101.169	100.578	98.9337	101.359	97.8858
2.67	101.374	99.3986	102.67	97.9354	99.8523	99.2437	97.9862	100.017	100.584	100.925	99.1989	99.1698	100.661	98.3186	100.672	102.289	98.8223	103.222	101.443	99.774	101.018	99.4556	98.7963	100.223	103.087	100.538	99.3596	99.3913	99.0988	100.528	100.307	99.874	99.8106	98.2696	99.8217	101.972	101.461	99.6584	98.8971	100.647	99.6509	97.6171	100.656	99.1952
2.7	100.606	98.3099	99.6922	98.9678	100.567	99.1519	96.2862	100.995	99.3963	99.2033	99.2953	97.3413	100.41	98.6296	99.5709	102.464	99.0195	100.592	101.102	99.537	101.263	98.3625	98.1375	97.8704	101.351	100.907	100.341	100.18	99.9666	98.9498	100.806	101.666	100.881	97.1582	100.036	100.423	102.33	96.2324	98.5305	100.595	101.604	98.221	98.9373	100.983
2.73	100.19	102.088	99.53	99.3123	101.265	98.934	98.6641	100.623	100.727	99.6208	99.9241	99.8793	99.9276	99.6252	99.0651	103.527	98.332	101.2	100.678	97.7642	99.0995	99.2573	99.2778	100.88	100.233	101.412	100.432	99.6766	99.4357	100.054	100.746	101.839	101.138	99.1721	101.052	100.905	101.604	98.5837	98.721	99.5462	100.481	99.9139	101.051	100.15
2.76	101.675	99.5275	100.909	98.7346	99.6038	97.8263	99.8282	99.0709	100.454	100.325	100.26	99.4748	100.781	98.6232	99.2645	97.9629	97.3094	101.627	100.256	99.4622	100.007	98.1647	98.7756	98.8884	100.673	100.797	99.1762	98.2812	100.831	99.9733	98.8347	100.341	98.5475	99.8163	100.457	101.547	101.982	98.2728	101.274	101.837	97.8166	98.6984	102.807	100.671
2.79	99.5934	100.036	100.694	98.2783	99.6579	99.7567	97.1773	99.8795	100.827	99.9994	99.7185	99.6455	99.0477	98.0768	101.081	99.7832	97.312	101.231	101.273	98.9403	99.4454	99.8283	100.665	100.457	101.832	100.237	99.343	99.2008	99.4949	99.6873	99.8012	101.047	98.7951	97.2622	99.1854	99.6677	101.024	97.6983	102.483	100.247	98.936	99.6089	101.021	98.7247
2.82	101.431	99.8009	99.808	98.9711	99.6386	99.9312	99.9343	99.4683	100.601	101.087	100.809	98.2043	100.903	98.3883	99.1222	98.2508	98.9071	101.741	98.9519	98.8275	100.302	99.2029	98.7058	100.087	102.668	100.172	99.9856	98.8057	100.527	99.8525	98.9954	100.751	98.8834	99.8305	99.7439	101.406	102.284	98.5708	100.115	99.4444	99.3127	98.3715	99.527	100.047
2.85	100.621	100.148	101.786	98.2891	100.929	99.4464	99.4996	101.282	99.6893	100.208	99.0182	99.7576	100.872	98.2905	100.172	100.529	98.5654	102.139	100.693	99.4355	98.9924	99.899	98.2953	100.242	100.846	101.018	99.5831	100.685	100.43	99.4572	100.29	100.981	97.3409	100.78	99.137	100.916	100.614	99.3787	100.049	99.1972	100.82	99.7916	100.306	98.8926
2.88	101.661	100.055	99.2446	100.472	99.9985	98.5126	99.92	101.304	98.7159	100.416	99.3555	97.1742	100.564	98.6477	99.8958	101.132	99.5632	100.703	101.712	99.6561	101.409	98.8744	100.854	99.9443	99.3253	100.116	100.037	100.508	99.3798	99.2119	97.7935	99.8505	96.5975	98.2793	99.8361	100.28	100.453	99.1059	100.54	102.07	99.353	100.061	99.8644	100.812
2.91	100.513	98.8968	101.51	98.207	100.576	97.6764	101.46	99.8421	99.9586	101.253	100.868	98.7796	100.575	98.1054	101.049	99.9537	98.1274	101.841	100.914	98.9522	101.185	98.7724	97.9966	100.848	100.303	100.002	100.175	99.5624	100.092	99.5345	99.3231	100.835	96.8049	98.1004	100.991	100.885	100.414	100.034	100.92	99.8227	100.005	99.273	99.7948	100.591
2.94	101.054	101.015	99.3222	99.4116	99.6682	99.07	101.343	99.0643	99.75	100.721	98.7067	99.2993	101.521	98.0275	98.2705	98.0554	98.1537	101.568	99.961	98.1735	100.383	100.125	98.9844	102.055	102.324	99.4377	98.8089	101.601	99.1462	98.7676	97.9694	100.746	97.5949	101.409	99.8268	100.233	100.196	98.9779	100.567	101.247	98.4235	98.5895	99.4175	99.5445
2.97	99.2812	99.9307	100.339	99.0721	100.562	99.8069	99.4508	100.217	99.377	99.3692	98.5251	99.1073	100.676	98.2231	99.2384	100.398	98.8965	102.768	101.12	98.655	100.806	98.9787	99.4894	100.103	100.422	100.438	100.249	98.5446	99.8553	98.3342	99.8815	99.0438	96.2002	99.2202	99.1816	100.608	100.121	97.9879	100.305	100.077	99.028	99.7953	99.667	101.284
3	101.487	100.338	100.649	99.0063	99.7615	99.958	98.6089	99.8012	99.9609	99.8194	98.9974	97.8003	100.666	98.1013	99.4681	99.7666	99.97	100.648	101.49	98.6988	101.652	99.9084	98.5091	101.127	100.938	100.166	100.026	99.8654	99.4581	99.4507	98.9654	97.9391	98.1395	99.6856	100.96	101.779	100.395	98.78	102.919	100.29	99.8564	98.6831	98.7631	101.21
3.03	100.884	100.362	101.688	99.6429	100.02	99.0878	100.564	100.078	99.662	99.2682	101.124	97.9757	99.0394	99.7874	100.597	98.3863	98.9222	101.441	101.687	100.698	99.8824	100.445	99.756	100.495	102.234	99.5377	99.5786	99.1059	100.666	99.7388	97.8612	99.1328	97.3145	100.462	100.005	101.103	101.579	98.8302	98.4436	100.484	101.367	97.3876	99.6041	101.048
3.06	100.023	100.127	100.721	98.891	100.229	100.623	98.8488	99.2845	100.338	100.79	99.7739	97.5564	101.261	98.6297	99.9888	99.5582	99.3687	102.567	100.722	97.9895	101.409	99.4504	100.904	100.065	100.58	100.937	99.3867	98.2062	97.6147	99.6507	102.488	99.6677	97.6726	100.832	100.003	101.94	99.8814	98.8302	102.277	100.233	99.1348	98.3791	99.0372	98.4736
3.09	100.151	99.2793	100.596	99.5883	100.968	100.37	99.7451	101.49	100.141	100.407	99.0115	97.403	102.35	97.997	99.3311	100.873	98.3155	99.9968	101.429	98.9642	99.9116	98.8618	99.4425	99.7172	101.386	100.1	100.091	98.65	100.954	99.8704	98.3474	99.8509	98.0742	97.3099	99.8093	101.19	101.337	96.0445	98.5519	102.389	100.664	98.6856	101.621	97.8359
3.12	101.709	99.3841	101.63	99.0635	99.9066	100.443	96.5709	100.384	100.67	98.718	98.3723	97.2785	99.6523	97.8398	99.844	99.0701	98.8675	100.125	102.355	101.8	98.8182	98.8092	98.8351	98.0785	103.152	99.9755	101.189	100.3	99.3709	100.549	98.6815	100.045	101.07	96.9419	99.5953	100.413	101.538	98.8759	99.3046	99.0535	101.545	99.6979	102	100.908
3.15	100.495	100.864	100.39	100.624	100.516	100.881	97.5897	99.2242	100.187	100.186	99.4006	99.2479	101.381	98.7428	101.012	99.6735	99.6801	102.499	100.824	100.864	101.619	97.5681	98.0103	98.6681	99.5314	100.46	101.685	98.0943	99.7476	100.828	99.5245	100.189	100.415	98.2516	99.7636	101.413	101.894	99.2649	99.658	98.9485	99.5046	98.8103	100.299	99.7439
3.18	101.364	100.781	101.461	99.8503	100.19	99.6598	96.9673	99.3699	101.295	99.3985	98.441	98.6414	98.7073	98.943	100.787	99.4832	97.5229	101.554	101.508	96.2782	99.8922	99.0704	99.0821	99.2111	102.13	100.657	99.8033	98.443	99.9601	99.4215	100.202	99.8641	100.655	100.722	100.702	100.098	100.63	97.5703	101.25	99.4047	100.592	98.7305	100.626	100.308
3.21	101.783	99.0132	100.892	99.3742	99.6417	100.261	97.3795	98.5789	100.188	101.722	100.881	98.3468	99.3811	98.1026	99.3781	99.536	97.9309	101.114	101.273	100.609	100.486	98.9025	100.36	100.543	99.8568	101.385	100.201	99.5792	98.9345	99.3661	98.7937	101.772	98.2283	98.73	100.702	101.35	101.376	98.3907	101.167	99.9991	100.394	97.8725	98.8772	101.158
3.24	100.67	99.7	101.151	97.8228	101.708	99.8991	98.665	99.6296	99.5695	99.4624	98.8319	97.4104	100.202	98.8215	99.8544	100.133	98.0446	101.747	99.3229	97.727	101.015	99.3329	98.8627	99.0802	99.6851	100.369	99.3762	99.8737	99.1744	100.048	100.234	98.3138	99.1322	98.4241	99.2828	99.6107	100.653	97.9762	100.965	100.935	99.9781	97.6615	97.9558	99.2734
3.27	100.585	99.5408	101.211	100.181	100.551	100.474	97.4765	99.6036	100.312	99.177	100.166	98.3729	101.138	98.2756	100.894	99.0339	99.4957	100.216	99.2716	98.869	100.138	99.2189	99.1433	100.793	100.865	100.201	98.4652	98.6662	99.9574	99.997	98.9222	98.9452	97.31	99.2531	100.47	100.859	101.332	98.3464	100.153	100.189	99.9374	98.2029	101.359	99.9991
3.3	99.437	100.533	100.398	99.9607	100.234	100.188	97.6635	99.1513	99.1669	101.687	100.108	97.3665	98.8841	99.2326	100.069	97.7494	99.2877	101.568	100.423	97.809	99.1033	99.9535	100.601	99.1915	99.9763	100.101	100.41	99.9912	97.095	99.2242	101.986	100.125	96.375	99.5002	100.639	101.403	99.0571	98.5954	102.206	98.6335	101.089	98.9405	99.1227	98.083
3.33	101.105	99.7021	100.679	100.432	100.578	100.34	99.8503	99.2451	99.9241	99.7198	98.7167	98.7847	100.642	97.8544	99.1167	98.7753	99.9307	101.897	99.8777	101.373	100.915	99.0861	98.892	98.5853	101.104	101.584	99.5115	99.8614	99.5286	99.1843	98.5531	98.3797	97.2374	99.9217	100.428	101.709	99.7404	99.1584	99.4135	100.662	99.3372	99.7202	98.6111	97.378
3.36	101.341	100.379	101.286	98.9075	99.8469	100.683	97.0052	100.705	100.226	100.953	100.144	98.4929	99.0634	99.264	100.892	100.192	98.4718	100.43	100.338	99.539	99.5277	100.296	98.6897	100.43	101.017	100.659	100.296	100.147	99.0332	100.083	101.883	99.1616	96.2199	99.5563	99.8836	100.982	101.471	97.5635	101.963	100.501	100.261	99.0158	100.835	99.4362
3.39	99.3349	100.405	100.601	99.1337	101.321	98.7024	100.163	101.914	98.8123	99.9479	99.5138	97.1637	101.194	99.1759	100.623	100.854	98.8644	101.539	101.023	99.163	101.099	98.7975	101.229	100.239	102.869	99.9724	99.3383	101.725	99.2462	99.4781	100.838	99.2795	97.709	98.5946	101.277	100.838	100.676	97.9848	101.611	100.652	100.488	99.3	98.6543	100.761
3.42	100.397	99.1299	99.6641	99.4447	99.3684	99.3327	99.2525	99.9868	99.1097	99.5171	100.388	99.0033	100.703	98.6461	101.994	99.3576	99.2076	100.532	101.357	98.8359	101.956	100.198	99.073	100.688	99.5955	100.55	99.5806	99.8052	102.095	99.897	97.6779	102.208	96.8596	101.17	100.295	102.359	98.5942	95.9994	103.812	101.989	100.199	100.952	100.273	99.8946
3.45	99.4021	100.837	99.3672	100.196	99.3279	98.1119	96.8014	99.5615	100.182	99.128	99.7631	98.5794	101.077	98.4552	100.527	101.36	97.7737	100.693	101.441	99.3115	101.036	99.3925	99.9461	100.452	99.4851	100.716	99.5594	98.5431	99.903	99.2763	99.7239	98.9109	98.8202	97.8952	100.388	102.211	99.0957	99.7547	99.9498	98.9882	99.0028	99.5173	100.33	99.0943
3.48	99.6573	99.6844	101.246	99.9032	100.775	99.267	100.275	101.827	100.011	99.9109	98.723	99.1289	101.439	97.9081	99.1833	100.222	99.6775	100.538	101.455	98.4979	100.07	100.076	99.3054	100.749	100.59	99.8704	99.7772	98.1843	100.185	101.211	102.94	101.214	97.2078	97.7154	100.199	103.161	96.9735	98.9525	100.027	101.383	99.1593	97.8422	99.0509	100.702
3.51	101.001	99.7532	100.696	99.0459	101.007	100.174	99.8439	100.294	99.4259	100.47	99.3883	99.6949	100.251	98.4434	100.153	100.426	98.7114	103.051	100.737	100.466	102.13	98.7796	101.15	99.4425	102.73	99.9525	99.6698	100.281	98.279	98.7187	98.1154	99.8503	98.378	100.181	100.381	101.039	100.189	98.0755	102.585	101.864	100.473	99.3393	99.9659	99.7318
3.54	100.034	100.222	102.085	99.8997	100.72	98.9309	99.9057	100.873	99.8659	100.058	98.9612	98.8934	101.113	97.9227	100.726	99.7396	100.234	102.526	100.031	98.2047	100.399	96.952	100.174	99.6683	101.572	100.298	99.6158	99.8465	98.6359	98.7412	99.298	98.8542	96.6869	98.8025	99.562	100.039	97.312	98.053	98.7368	99.2967	99.717	98.1865	99.5349	100.931
3.57	100.726	100.213	101.533	99.6734	99.3099	100.358	98.0818	100.424	99.0334	98.8015	99.3775	98.8965	101.381	97.5686	99.4739	99.1136	99.5408	101.455	100.408	97.184	99.1566	99.8981	99.7165	98.5965	101.39	100.077	99.2904	99.1838	98.3303	101.216	100.73	97.3825	97.9656	98.7705	99.6522	98.7308	101.855	98.2024	100.099	99.8988	98.3559	98.8551	100.649	100.501
3.6	100.262	99.6396	100.493	98.9808	100.082	100.301	100.613	100.383	99.8325	100.142	99.2837	98.4011	100.23	98.5012	100.847	100.082	97.4261	103.442	100.9	99.6837	98.915	98.9846	99.2665	100.744	103.519	100.253	100.66	100.622	98.6055	99.7681	97.3824	100.795	99.0141	99.1879	99.0641	101.598	101.141	100.135	99.6982	100.053	100.875	99.9378	100.243	99.7222
3.63	99.8733	98.7671	101.272	99.4287	99.6721	97.682	99.9042	99.1337	100.338	101.954	98.8068	97.6337	100.041	98.7824	99.0142	101.007	100.562	103.742	102.337	99.7253	101.254	100.475	100.889	99.618	102.239	100.635	100.737	99.7525	98.8464	99.3629	97.1004	101.398	100.562	99.4382	100.959	102.754	101.549	97.6245	101.015	99.6565	99.2834	100.45	99.4709	98.0947
3.66	99.7107	99.5002	101.322	99.2687	100.314	99.2712	96.6631	100.811	99.8583	99.612	99.6288	97.6878	98.8612	99.7537	98.907	100.277	100.414	101.66	100.452	96.3803	99.6982	99.0479	97.4462	98.6212	101.4	100.347	100.833	98.6235	98.4333	99.682	99.4891	99.0873	98.9247	97.7531	99.4467	101.638	99.4344	99.5058	98.7906	99.7707	99.6971	100.179	101.14	100.484
3.69	102.062	99.4356	100.282	98.6738	99.8346	99.2352	100.67	102.408	100.194	100.191	99.5642	99.5198	99.1132	97.3419	99.3545	99.3993	97.7812	100.752	101.113	98.4846	99.732	99.7917	99.1342	100.422	102.059	99.4709	99.1899	99.4918	98.0625	100.228	99.5046	98.9137	100.54	97.5412	99.4323	100.958	100.752	100.609	99.9388	98.6907	97.9492	99.7569	99.8955	99.0437
3.72	100.066	100.351	101.794	99.8707	99.2815	101.791	99.518	102.086	99.7251	99.6189	99.7473	99.5973	99.9881	98.9226	101.43	99.8417	98.9378	101.644	100.433	98.8148	101.176	99.8429	98.8528	100.858	100.519	100.582	98.8167	98.9352	101.434	100.067	96.9699	100.469	97.8541	97.796	99.8864	102.12	101.845	100.201	101.125	99.6003	99.387	98.6955	102.482	100.015
3.75	99.5525	100.378	100.226	99.7728	100.221	99.6909	98.4139	100.794	100.116	100.049	99.3786	98.021	100.877	98.0619	100.22	99.873	99.9033	100.507	102.267	100.292	100.633	99.2501	100.68	99.1144	100.828	100.013	99.2133	99.4216	99.9104	100.254	98.1067	100.412	96.3135	100.353	99.3823	101.156	100.573	99.2423	100.096	100.025	100.064	99.9318	100.369	98.896
3.78	101.466	98.5061	101.703	100.646	101.266	100.325	97.9327	102.132	101.142	99.5233	98.5008	97.5845	101.688	98.1177	101.213	99.25	98.6011	101.528	101.007	97.9059	99.627	99.6585	99.1495	99.4596	101.451	100.955	99.4509	97.4912	101.795	101.382	99.9457	98.7723	95.7445	99.0692	99.8788	102.942	100.708	97.4867	101.487	100.856	100.046	97.97	101.66	99.2066
3.81	101.176	99.8252	99.9746	100.663	100.485	98.7109	98.7841	99.7494	99.2305	99.7615	99.0091	99.0593	100.34	98.5195	100.837	101.583	100.579	100.807	100.708	97.9523	98.83	101.054	99.4207	99.3945	102.487	101.878	99.3202	100.676	98.9928	100.895	99.5856	101.705	95.0746	99.435	100.421	101.628	101.427	97.6061	102.371	99.1682	100.44	100.515	99.4806	99.9138
3.84	100.105	100.341	100.315	99.1215	98.3561	99.8403	98.7227	100.312	100.174	100.369	99.1399	97.9825	100.188	97.3326	100.155	100.368	99.8151	101.522	102.269	99.9011	100.924	99.3797	98.484	99.9291	102.326	100.02	99.8024	98.6784	100.996	99.6955	98.1343	100.84	96.0124	98.7744	100.728	100.527	101.147	97.7549	102.503	100.15	98.9595	100.64	101.874	97.5301
3.87	100.588	99.8643	100.181	98.6028	100.765	98.1871	97.8867	99.5669	100.305	100.244	98.7684	97.539	100.853	98.276	99.4589	99.7465	98.7103	100.666	100.531	98.4632	99.3024	99.4683	99.1571	102.264	100.22	100.61	99.2938	100.044	100.53	99.0433	100.247	99.6366	95.8493	96.4629	98.9423	100.59	101.375	96.861	101.289	100.54	100.752	99.57	100.527	99.7955
3.9	101.165	99.8479	100.635	98.3531	100.543	99.0569	97.8824	100.388	100.006	99.9864	99.7019	98.9179	100.801	98.7591	100.723	99.9674	100.903	100.631	101.149	96.964	100.095	99.4435	99.6399	99.3335	99.8277	100.225	100.389	99.9588	99.8593	100.005	99.3975	98.2796	96.3469	100.249	100.094	101.405	101.516	99.0426	100.087	99.3511	100.822	99.754	100.397	101.909
3.93	101.44	100.108	100.514	98.6775	101.529	99.3271	98.6073	100.145	100.173	99.9481	99.8828	97.1773	101.342	98.4078	99.5199	99.4212	99.1694	101.149	101.525	98.4124	101.158	99.9714	97.5515	101.705	102.334	100.209	98.429	100.877	98.3817	100.591	100.139	99.6015	97.4055	99.2128	100.355	101.232	100.723	95.8508	101.067	100.43	98.9003	99.8965	101.17	100.018
3.96	99.8053	100.082	100.524	102.369	100.133	99.3323	98.6969	99.6862	99.8228	100.942	98.9149	98.5012	100.736	98.2564	102.017	100.932	98.3547	104.338	101.901	99.9986	100.818	99.9759	97.4637	98.2037	100.938	99.9954	100.117	99.0977	98.1734	99.1509	100.071	100.78	98.4407	97.1516	100.208	99.6631	100.341	97.725	99.8097	99.0745	99.755	97.4271	99.1322	100.058
3.99	99.3979	101.387	99.6811	100.104	100.986	98.9176	97.8307	100.94	99.4989	99.7687	98.8258	97.721	99.7447	98.918	102.052	102.014	95.816	102.452	100.285	98.3741	98.1561	98.3638	100.126	99.9442	99.5125	99.7123	100.565	98.8382	99.3923	99.5388	97.8296	101.383	97.8005	97.2748	99.7798	101.32	99.1776	98.2719	101.468	101.6	97.7867	97.7427	100.72	100.982
4.02	100.243	99.1437	101.054	99.4305	100.974	100.168	98.4887	101.411	100.189	99.5988	98.8337	98.1167	99.6065	99.0246	98.1242	99.1247	98.8759	102.237	101.379	100.856	100.541	98.8065	100.201	100.353	101.033	99.8645	100.403	99.3241	100.049	99.0146	98.5144	99.3975	97.6466	99.8397	100.155	99.9679	100.114	98.8193	102.875	99.6434	100.657	100.461	101.487	99.1439
4.05	101.032	99.8486	100.295	100.163	100.174	99.0187	98.8459	100.389	99.7298	99.691	99.6881	99.7469	101.486	98.7888	98.0767	100.94	95.7952	102.504	102.061	98.4608	100.652	99.681	100.873	99.9388	102.785	99.3962	100.696	101.109	100.239	99.1378	100.128	101.495	98.4245	95.9405	100.014	102.358	101.114	96.5857	100.616	100.716	98.8193	98.1154	101.197	99.9593
4.08	99.8934	101.12	100.028	99.6729	100.834	97.8079	98.3201	101.829	100.45	102.058	99.202	99.0372	99.9627	98.6022	100.687	101.135	98.7581	103.053	99.9437	98.2878	101.143	98.1036	98.3732	100.222	100.939	99.7918	100.214	100.46	99.3455	101.281	98.9359	101.113	99.6987	97.7488	99.8394	101.936	99.101	97.8652	100.165	100.214	99.764	98.4738	98.0314	100.34
4.11	100.879	99.3741	100.116	99.7226	100.583	98.4389	99.4173	99.5406	100.166	98.65	100.159	99.1836	100.261	98.5331	100.074	100.064	97.7659	101.104	101.25	99.7786	99.3282	99.0643	97.4464	98.0841	97.7378	100.978	99.838	98.3359	97.7751	99.4364	98.3595	100.964	98.5593	96.3117	99.3679	101.883	100.223	97.8918	99.2345	98.8612	100.374	99.3465	99.807	100.064
4.14	99.5926	101.139	99.6309	101.275	101.225	100.167	99.7554	100.146	99.6033	101.013	100.125	98.9198	99.7862	99.0759	97.8872	101.116	99.7384	103.656	101.061	97.7929	100	100.259	99.2872	99.1661	100.851	100.166	100.049	100.646	99.0283	98.9323	99.1284	99.0229	100.235	98.3895	99.1821	102.666	100.757	101.214	100.812	99.8257	99.3708	99.2547	101.059	101.092
4.17	101.194	101.06	100.398	98.9937	100.168	101.836	101.778	99.2659	99.788	100.759	98.3077	97.7121	101.165	98.2023	98.4821	99.5468	98.105	101.31	100.498	98.5427	100.126	99.6702	100.589	97.8616	102.51	100.049	99.8571	98.8795	99.2206	98.9558	99.2268	100.217	95.7876	100.323	99.4912	100.526	100.495	98.1479	99.1542	100.471	99.088	98.8222	99.9465	103.176
4.2	100.126	98.8379	101.133	100.547	99.9047	99.0079	99.2401	98.3916	99.659	99.6553	100.219	98.4683	99.0418	99.0257	100.859	102.061	99.3581	101.574	100.491	99.3137	99.9985	100.753	99.326	100.402	101.654	99.6265	101.047	99.3813	96.6197	99.4048	99.6102	100.825	96.6321	97.2109	100.076	100.305	101.053	99.764	100.393	99.9606	98.3446	99.467	101.338	100.25
4.23	99.8895	99.7172	101.896	100.633	100.776	99.3738	97.0548	100.033	100.899	99.5155	98.2153	99.153	99.7385	98.9525	103.116	98.4402	99.2059	99.7573	101.085	99.0237	100.46	99.5691	99.6427	100.52	100.812	99.9744	98.7553	98.9007	97.5707	98.8178	98.0249	98.6014	95.5182	98.6305	100.106	101.585	100.892	95.8073	99.7171	102.451	100.043	99.0519	100.501	100.218
4.26	99.6877	100.688	101.553	99.8057	99.0458	99.2481	101.76	99.8541	99.4286	101.64	100.029	97.0458	99.8688	97.625	99.8283	100.598	100.069	102.5	101.521	97.7389	100.334	100.233	101.072	98.7668	101.857	99.2286	100.368	98.9027	98.6241	101.333	101.633	101.659	97.4496	99.6531	98.7257	101.301	101.114	99.2961	98.938	100.561	100.817	98.6793	98.3366	98.7117
4.29	101.688	100.119	101.058	99.1627	99.8587	98.9576	99.1274	99.3252	99.8358	99.5766	99.4328	98.8769	100.519	99.2146	100.389	98.5537	97.0233	101.042	101.367	97.8035	102.226	100.228	101.231	100.597	100.648	101.172	100.261	98.1957	98.3516	100.521	100.751	98.5536	97.747	100.191	98.1727	101.922	101.701	97.5248	101.568	100.154	102.097	99.7119	98.3644	100.212
4.32	100.872	100.271	101.387	99.4296	100.802	99.2587	100.277	98.9388	101.451	100.742	97.9404	98.6913	100.298	97.0954	100.82	100.555	98.2606	101.287	101.064	99.3381	101.063	99.2068	100.295	98.8427	100.274	99.5283	98.3375	100.719	98.0369	99.2172	99.8055	98.4979	95.9496	99.4888	100.171	101.947	103.079	98.09	99.0415	99.9144	99.1167	98.065	101.337	100.527
4.35	101.498	100.619	100.235	100.95	100.462	101.264	99.291	99.8176	98.5803	99.4682	100.169	97.7392	99.1623	98.6979	100.255	99.9405	99.2503	101.794	101.139	99.6533	100.413	99.2277	99.758	100.279	99.9631	99.4705	98.8046	100.85	100.179	101.158	98.5672	99.2489	97.9183	97.7956	99.6732	102.019	101.846	99.604	102.218	99.2703	96.8586	97.8089	100.467	99.1829
4.38	100.287	98.2154	101.025	99.8859	100.587	99.0311	99.7473	98.836	100.616	100.998	100.149	99.6814	100.907	98.4616	100.014	99.3193	97.6373	102.677	101.812	99.4036	100.833	99.2054	98.7909	100.311	101.756	100.168	99.4231	99.4865	101.464	100.791	100.629	99.0624	97.4579	100.031	100.419	101.447	100.763	100.009	101.774	99.6532	100.073	97.793	99.3775	100.199
4.41	99.1186	100.943	101.919	99.556	99.9437	99.7101	99.9537	99.6951	99.4314	99.7567	100.334	100.318	100.668	96.911	99.5196	101.355	100.62	101.457	99.7823	98.3563	100.493	99.8696	98.5123	98.5825	101.747	100.341	98.5343	99.5906	99.8158	99.9505	100.105	100.699	98.1749	101.607	99.31	102.537	101.287	97.9837	102.701	99.9406	101.805	99.2837	98.7324	99.7833
4.44	101.262	99.4412	102.11	99.9624	101.182	96.9905	97.5375	102.085	99.4168	101.514	99.967	99.5717	100.684	98.396	100.521	98.3383	99.2465	99.8943	101.123	98.8916	100.993	100.081	100.018	99.963	101.205	100.274	99.0172	100.223	99.4823	100.345	100.037	101.5	97.4226	97.1299	100.256	102.566	101.07	96.7969	100.854	100.139	101.515	99.0719	100.236	98.8714
4.47	99.9759	100.962	100.676	100.385	100.511	99.4677	100.326	101.397	100.509	100.557	98.787	99.458	100.247	98.1498	100.98	100.625	96.2877	101.483	100.767	99.6886	99.9237	98.6532	100.201	100.138	100.346	100.068	99.991	101.235	101.222	99.5122	101.33	100.699	99.6361	99.5872	99.0087	101.36	100.712	97.0761	101.054	100.481	99.5685	98.1008	101.113	99.5461
4.5	100.994	99.656	99.9726	100.352	99.811	98.9043	97.3052	101.36	99.9267	100.391	99.0821	98.6229	99.4373	99.0284	101.071	99.3611	98.6461	101.155	99.8917	99.0055	99.7478	99.4064	98.9829	99.3401	98.1791	100.524	100.17	100.308	99.7325	99.8039	98.2224	101.349	99.8456	99.5498	99.5969	99.9783	101.098	97.0729	102.108	100.799	101.134	98.0338	100.679	99.1056
4.53	102.426	99.7059	99.99	98.9292	99.8153	100.621	98.5804	100.003	100.548	100.25	99.6429	98.6553	101.183	98.8462	99.3562	100.15	98.9149	100.347	98.6714	97.8481	101.013	100.14	98.4407	99.0451	101.31	99.131	100.408	99.8143	98.7637	99.1776	99.623	99.685	98.0622	95.9102	101.583	101.899	101.332	97.0365	101.536	101.332	100.165	98.6883	99.3618	98.8321
4.56	100.384	100.887	100.801	98.657	100.464	99.2654	99.0611	101.494	100.15	98.8414	99.2691	100.497	101.025	98.6348	100.497	99.9672	97.9916	101.493	101.414	100.208	100.188	99.9588	98.9524	100.08	100.263	100.696	99.7922	97.3039	98.3521	99.5961	98.441	101.72	99.063	98.8781	99.2153	102.039	100.08	98.6839	101.713	99.3708	99.8764	98.7454	100.436	99.8248
4.59	100.416	99.5946	99.2385	98.5828	98.5035	98.5454	97.7614	101.989	98.9386	99.4023	98.7131	97.6402	100.392	97.6874	101.238	97.0142	99.2742	101.287	99.6123	98.28	99.6957	100.09	97.9395	100.193	102.019	99.2288	100.099	99.433	97.7967	100.139	99.7975	102.478	98.1397	100.576	100.494	100.112	100.05	97.0482	99.2671	100.299	101.129	97.0966	100.385	98.6986
4.62	101.086	101.171	100.955	100.283	99.8081	100.29	98.1443	103.496	99.5742	101.135	98.3162	99.513	100.297	98.6665	99.0248	98.919	98.6729	101.167	101.259	98.6422	100.803	98.1617	98.5932	99.6113	100.868	100.108	101.359	99.3637	97.963	100.39	100.719	100.243	99.0598	97.1771	99.3588	100.621	101.156	98.6982	100.62	99.016	101.015	98.6263	98.3487	100.278
4.65	101.033	101.041	99.7389	100.49	101.259	99.7499	99.9834	99.1382	99.5555	99.2965	101.637	99.18	100.865	97.4391	100.327	97.7816	96.2824	100.264	100.633	98.1176	98.6519	100.137	98.4783	99.8221	100.214	100.714	99.4919	99.6208	99.7645	99.7576	100.723	99.0831	96.2246	100.642	100.728	101.226	102.009	97.93	99.9848	99.5027	99.7505	100.294	99.4838	100.663
4.68	100.87	100.898	100.131	99.3483	100.647	99.9369	97.4649	103.692	100.51	99.7328	98.2647	98.9519	100.267	97.4736	100.723	100.838	99.5043	101.703	99.9607	98.5015	100.722	99.1479	98.0632	100.993	101.309	100.217	98.7244	99.8845	100.497	100.873	99.2057	100.049	99.9686	98.6363	99.7672	100.784	99.8623	98.6829	101.238	99.2156	98.2496	99.6304	102.036	100.465
4.71	100.776	101.178	101.306	100.413	100.863	99.5297	98.9588	98.9558	100.324	98.8043	99.3552	98.2214	101.018	99.3515	100.216	99.8496	100.664	101.821	101.144	98.7916	99.6323	99.008	100.048	99.5563	101.151	100.166	100.32	99.0028	99.3861	99.5078	101.77	99.088	97.7831	99.1698	99.0371	100.664	101.894	97.167	101.15	100.724	99.4849	98.481	99.7738	100.557
4.74	101.442	99.6868	100.723	99.5751	100.918	99.6506	97.8119	101.214	100.751	99.6135	99.7245	99.587	100.504	98.3333	101.395	100.266	98.2113	101.583	101.81	97.5697	99.6246	100.234	99.9609	99.2758	103.35	100.78	98.0331	100.595	102.225	98.8032	98.1298	101.091	96.5122	100.277	100.502	101.966	101.294	99.2765	99.7433	99.477	100.878	99.7453	100.027	99.8378
4.77	101.151	101.029	100.951	99.3098	100.7	97.9264	101.281	100.658	99.6442	98.8596	100.465	98.4678	102.085	98.8424	101.921	98.2298	98.0878	101.504	100.45	96.5199	101.98	100.231	98.025	100.269	100.049	100.01	99.4453	99.6404	101.172	100.644	99.7563	102.295	97.5388	98.1889	99.95	100.905	102.001	98.1053	100.867	99.67	100.537	97.9329	100.476	99.846
4.8	100.297	99.7917	99.7016	99.9022	99.8519	99.7652	99.0703	99.4845	99.5069	97.8778	100.065	97.5114	101.415	98.6282	100.648	98.8228	99.9211	102.073	100.581	99.3624	101.018	98.8589	99.0202	98.3388	101.608	99.6465	99.4452	100.27	97.953	98.6508	99.9233	99.0866	97.0146	100.015	100.204	99.7801	99.9119	99.9605	100.571	99.1387	99.7713	97.9527	99.9282	99.2772
4.83	101.618	99.4363	99.7991	99.0495	99.8762	99.3349	99.4405	99.7935	99.7226	99.8882	100.418	98.5562	99.2849	99.0715	101	99.1669	99.5473	102.577	101.424	99.6793	102.622	99.9157	99.56	101.215	101.177	99.4622	99.3958	98.0598	98.2818	99.0479	98.586	100.785	95.5361	99.0937	100.196	100.848	100.884	99.1034	101.029	100.519	99.3145	98.1074	100.195	100.639
4.86	100.255	101.475	100.776	99.7809	99.6678	99.2181	99.0449	100.343	99.8054	99.8756	99.7209	99.0011	99.4826	99.5594	99.7612	98.9138	100.624	100.593	101.654	100.742	100.386	99.1684	98.714	99.4711	100.728	100.199	100.313	99.7792	99.5751	100.59	98.6149	98.3811	95.282	98.2523	101.119	99.7972	102.298	99.4834	101.538	100.674	98.1072	99.2636	99.6232	100.32
4.89	100.6	98.7906	100.205	100.083	101.188	99.0401	98.9785	99.8515	100.62	100.311	99.4196	98.5883	99.6028	98.031	101.679	99.9388	98.2396	103.474	101.163	99.9933	101.11	99.1555	98.2218	101.72	99.864	99.699	99.5889	98.8734	99.3328	98.6363	100.367	98.2745	98.0247	100.982	100.007	100.052	100.562	98.6549	102.472	98.9006	99.1519	98.721	101.143	98.4224
4.92	98.9636	101.499	101.51	99.3115	100.593	97.7738	99.1555	99.8343	99.6822	100.845	99.5737	99.324	99.9764	97.2232	100.641	99.5317	99.0778	100.661	100.693	101.693	100.328	98.8432	99.4802	99.9902	101.98	99.5468	98.6651	99.2394	101.961	99.9405	100.458	99.7697	95.9205	100.196	100.785	100.98	101.728	99.4093	102.066	99.7942	100.645	98.9595	100.499	101.045
4.95	100.139	102.175	101.328	100.213	100.738	100.363	99.2433	99.6846	99.6047	98.3503	101.212	98.9299	99.9225	98.293	101.539	99.6737	99.3002	102.541	100.394	99.8191	99.9178	100.436	99.1956	101.386	101.817	100.176	98.4734	100.511	100.999	100.187	99.631	102.174	96.7881	97.7243	100.547	101.533	101.787	95.7327	99.5357	101.125	99.9032	98.8489	101.754	99.8467
4.98	99.8357	100.197	101.349	99.4339	99.825	98.8053	98.6299	100.443	99.9013	101.626	100.002	99.3212	101.122	97.7982	101.704	100.373	100.291	100.352	101.818	98.3409	100.567	98.854	99.796	98.7579	101.997	99.6741	100.629	99.8202	99.1513	100.728	99.223	100.481	99.0998	98.8307	99.6568	100.58	101.325	98.7845	99.8711	99.7489	100.581	99.5987	100.414	97.344
5.01	99.8842	99.3017	101.307	99.6051	99.4105	99.016	99.1858	102.093	99.48	98.6025	98.5666	99.5875	98.8853	98.1889	100.284	99.7458	98.2736	100.875	99.4769	98.9405	99.6126	99.3606	99.2555	97.9762	100.299	100.662	100.527	99.4312	99.8415	98.8847	99.392	101.951	97.6082	95.1539	98.3605	101.979	100.605	96.7126	101.057	101.303	100.804	98.6276	100.114	99.4886
5.04	101.29	99.3448	101.554	99.2217	100.28	98.1421	95.9778	101.254	100.301	99.2973	99.1145	99.1072	100.213	98.2091	99.6646	99.1245	97.9495	101.141	100.361	99.7837	99.7404	97.8815	98.1786	99.5932	99.1175	99.9191	99.6095	98.7537	100.617	98.7283	97.9121	99.0963	98.6413	98.4385	99.9385	99.8137	100.911	97.1339	99.1087	100.537	100.739	98.8761	99.4603	100.937
5.07	99.9042	99.8857	100.861	100.716	100.383	99.8282	97.165	101.632	100.766	100.471	99.385	100.685	99.8864	98.7867	99.5395	100.448	99.6867	101.341	100.052	98.7179	99.6591	99.2409	99.5857	99.8123	102.724	100.481	99.5452	98.6742	101.354	99.2049	100.64	99.8341	100.098	99.5633	99.71	100.342	100.449	95.7636	100.424	101.651	99.9615	100.223	99.6397	99.1523
5.1	100.056	100.939	101.28	99.2077	100.193	98.8794	97.9386	100.482	101.416	101.015	100.413	97.8275	100.342	97.8342	99.1865	99.3801	98.1744	102.253	102.176	98.4139	100.133	99.4358	98.868	100.476	102.116	100.06	99.0646	98.3824	100.389	99.8381	99.3327	100.252	98.3934	96.1982	100.633	100.432	100.563	96.7663	103.924	101.66	100.448	97.9007	100.221	99.7409
5.13	99.8679	100.625	99.7777	100.12	99.8219	100.37	97.7806	99.5416	100.065	101.249	99.78	97.2779	101.308	98.6294	101.36	101.078	97.8288	102.164	99.6618	99.2762	100.377	99.7882	98.8011	99.022	102.207	99.9666	100.613	101.626	99.4925	98.8781	98.3468	100.425	99.1027	100.021	99.9669	101.69	102.377	99.6527	100.554	100.185	100.711	99.317	100.286	96.7944
5.16	99.9453	100.768	100.046	99.3686	100.692	98.7394	99.7028	99.789	99.5008	99.8531	98.9383	99.1512	99.5401	97.7311	102.52	99.9577	100.98	100.875	101.342	97.6883	98.3275	99.197	99.3388	101.038	99.9681	101.373	100.09	99.0065	99.387	100.781	97.6027	100.342	96.9721	97.7017	100.413	102.111	100.719	99.8322	99.0911	98.7348	96.56	98.9172	101.228	99.3627
5.19	99.8159	99.6346	100.151	99.3856	100.449	99.7166	99.7689	98.5325	100.279	99.7252	98.6979	98.8836	99.4938	97.4826	99.1797	99.7414	100.567	104.033	98.4209	100.616	101.278	100.358	99.8597	98.4018	101.836	100.612	99.7855	98.3573	98.5234	99.9	96.643	100.022	96.4846	98.3418	100.74	100.82	101.003	99.2591	99.2891	99.6723	100.901	97.2735	102.53	98.2843
5.22	100.775	100.456	101.183	100.647	100.03	99.8586	97.4196	101.08	99.9221	99.2169	100.357	98.5689	99.8514	97.9956	100.208	99.1427	98.1045	101.083	102.32	100.147	99.9035	99.084	97.8303	98.5802	103.05	100.326	99.5987	100.206	99.0874	98.5518	100.03	100.528	96.2158	99.9997	100.227	103.425	99.7518	98.0359	98.6973	98.5782	99.3412	99.0744	99.4255	98.648
5.25	101.857	101.568	102.532	99.2772	100.348	101.319	99.1228	100.454	99.87	98.8434	98.8696	98.6281	101.91	98.3604	99.5981	100.616	98.6558	102.344	101.075	99.7954	99.3439	100.531	97.4053	100.22	102.582	100.762	98.667	99.9982	99.263	98.6953	101.387	101.228	97.7845	100.327	99.8688	101.191	100.57	98.4367	100.409	98.4831	100.333	99.6096	100.13	97.9789
5.28	100.887	100.862	100.15	100.558	100.664	99.7685	96.4853	98.8266	99.2582	98.6338	99.3417	97.7352	100.086	98.0268	101.237	98.9351	99.4017	102.317	101.121	99.3553	100.37	99.9935	99.6551	98.9348	101.811	99.0578	99.5327	98.7458	99.0028	99.2267	100.788	97.6111	97.813	100.427	100.589	100.657	101.733	98.3392	99.5824	101.205	100.797	98.4624	99.5651	100.069
5.31	99.887	100.004	100.978	97.926	100.203	100.016	100.493	100.264	100.109	99.8677	99.5464	98.8885	101.053	97.7105	100.176	101.413	96.2555	102.27	100.577	99.7457	99.1222	100.517	96.3299	98.5859	102.383	99.7442	99.9285	99.069	98.5342	98.7425	100.723	98.7966	96.256	98.7315	100.421	102.117	100.504	98.001	102.609	99.5889	100.994	100.846	100.131	99.4283
5.34	101.854	100.146	100.637	99.0849	100.203	99.2198	99.2756	98.8671	99.444	99.5846	98.5973	98.9711	99.8527	97.9862	100.192	98.2359	99.6575	100.744	100.384	97.49	100.417	100.366	98.7543	99.5586	98.8758	99.6493	98.7027	100.603	101.875	98.7309	98.9505	100.188	96.8625	98.5797	99.8154	100.393	98.5396	98.6533	101.298	98.6726	99.7377	98.9844	98.1897	97.294
5.37	101.569	100.594	100.201	98.8605	100.07	99.1165	98.5417	98.8734	101.343	100.144	99.2271	97.8249	100.258	98.6056	98.889	99.6937	98.3523	103.024	100.773	100.49	100.318	100.225	99.4499	99.6164	102.433	100.369	98.4232	100.25	99.01	100.876	98.5025	96.9239	97.4107	97.8636	98.8132	101.234	100.613	98.9546	98.6836	99.904	100.967	99.2874	99.7441	99.9483
5.4	99.6729	100.335	99.4681	99.951	100.058	98.6153	100.981	100.73	100.53	98.2468	101.409	99.5287	101.603	97.4484	101.354	100.718	98.6058	102.698	99.7442	97.2372	100.097	99.3227	98.4786	98.5812	100.666	99.1204	98.0442	99.0176	96.4129	100.28	99.1505	97.407	95.8773	99.1852	99.8397	101.392	100.621	98.0755	99.4454	101.465	100.686	97.882	102.059	100.949
5.43	100.02	100.339	99.1875	99.6839	100.514	100.708	99.7571	99.5923	99.0476	100.53	98.7609	98.8453	100.284	97.8562	99.6978	99.2851	98.6827	102.569	100.532	99.496	101.902	99.44	99.0595	99.3032	100.844	99.8713	98.669	99.4823	99.51	98.5877	101.733	100.756	97.1067	99.8103	98.6036	100.71	103.048	96.028	102.497	100.509	102.53	99.0221	99.5364	100.613
5.46	99.859	100.417	99.7528	99.6475	100.932	99.3494	99.9095	98.7881	99.6155	99.8592	100.061	98.5045	100.82	99.3768	99.2773	102.47	96.7283	101.637	102.326	97.4542	98.9687	100.609	100.178	99.1559	103.485	99.1967	98.3402	98.3568	99.1292	98.8431	98.1762	100.187	98.9972	97.2748	99.9988	100.158	101.273	99.3329	102.118	99.3392	100.157	97.1714	100.797	100.51
5.49	100.632	99.9331	100.62	100.048	99.7401	99.6685	100.487	101.994	100.026	99.0235	98.339	99.107	99.6718	97.9917	100.82	97.546	99.7982	102.235	102.38	98.4411	97.6905	99.7508	98.4869	99.6111	101.214	100.46	98.8551	100.122	100.451	99.6211	101.578	100.495	100.803	96.245	100.21	100.627	102.133	98.0305	100.374	100.861	99.0512	99.2833	98.6507	101.078
5.52	99.5787	100.803	100.578	99.9973	99.66	99.1331	99.9883	99.7384	100.123	99.316	99.2847	98.5977	101.703	98.1668	100.402	99.1782	98.6381	102.278	100.669	99.7107	100.598	99.6215	100.343	98.995	100.781	98.8486	99.9075	99.1246	98.6674	98.5316	99.3089	99.7866	97.7928	98.3168	99.0045	102.304	100.723	98.7927	102.214	98.6764	99.7179	96.8896	98.6328	99.9559
5.55	101.121	99.8488	102.333	101.739	100.155	100.403	98.7948	98.996	100.891	100.186	99.2085	97.7857	100.098	96.8428	100.6	99.1639	99.1047	100.498	101.749	99.4373	99.6571	98.7128	98.6119	99.5232	102.107	100.65	98.9307	99.7341	98.2586	99.5877	97.0349	100.225	99.261	98.8247	100.231	101.859	101.64	98.6976	99.7081	100.715	99.8072	98.5217	100.767	98.8496
5.58	101.122	99.7893	99.7319	99.5881	100.749	99.3841	98.007	96.7603	99.8351	101.2	99.3743	98.3384	100.915	98.6108	100.009	101.039	98.9375	99.8675	100.082	99.4148	99.2073	100.379	97.8279	99.4556	102.49	99.4448	99.529	97.6458	100.285	98.8361	98.3517	99.9548	98.2765	97.1739	99.1756	100.53	100.445	98.6164	97.454	99.0871	101.463	98.8583	100.15	97.0704
5.61	99.3929	99.0299	99.4971	98.8376	101.194	101.424	97.9086	98.7709	99.2795	100.469	99.9539	98.5583	99.9222	97.3701	98.7961	102.083	99.0488	100.655	100.364	97.4171	99.7936	100.473	99.2734	99.129	101.777	99.6393	99.6147	99.9505	99.0604	98.3145	97.2874	101.203	96.8759	99.2876	100.012	100.152	99.9607	98.4906	102.087	98.886	100.934	101.078	100.476	98.5547
5.64	101.209	98.5827	98.6767	99.9554	100.157	98.7027	99.5501	99.562	101.128	99.974	98.4686	99.7292	100.541	98.3493	98.9842	99.6688	102.591	100.997	101.193	98.4596	99.6034	100.346	97.0111	100.649	101.725	99.9302	100.325	99.0763	97.6524	99.8843	98.2045	96.054	95.7586	97.8647	99.2482	100.212	98.1181	97.3622	100.943	100.498	98.9173	99.4556	100.933	99.4877
5.67	100.328	98.9166	101.918	98.8885	100.281	100.997	100.051	100.948	99.8417	100.633	99.976	98.9145	100.594	98.9661	99.1981	97.7467	100.107	100.684	101.504	97.9252	99.8882	99.5648	98.8598	98.4052	103.846	101.414	99.4641	99.4138	96.7048	99.8971	98.542	97.4165	96.9453	99.499	99.715	100.831	101.341	97.0843	98.749	99.7918	100.251	99.3783	100.657	98.9612
5.7	100.537	100.815	101.756	99.818	99.9798	99.8404	99.8189	99.8446	99.6338	98.9842	99.1102	98.5603	100.536	98.8213	100.708	99.3858	99.2878	100.097	100.877	97.4808	100.334	100.077	100.372	99.1031	99.6774	100.832	99.409	98.9325	98.6715	99.2568	99.4086	100.621	97.9599	96.9975	100.082	100.453	100.942	99.5093	101.712	100.037	100.807	98.2494	97.6927	100.027
5.73	101.057	100.604	101.304	99.7117	101.159	99.6413	98.8346	100.173	99.897	99.6754	99.9643	98.7766	100.191	98.1863	100.078	99.191	98.7628	103.016	101.811	98.3377	100.738	99.6208	100.929	98.4803	102.585	99.6893	98.4745	99.3538	98.5273	100.712	101.075	97.6721	98.7834	99.5463	98.8195	100.206	102.494	97.6477	101.413	98.4072	100.112	98.1662	99.806	99.6233
5.76	99.3514	100.16	100.626	100.567	99.3188	99.044	97.5165	99.5164	98.4029	99.6172	98.9764	98.3424	99.7842	97.9178	101.24	98.3834	98.0898	103.095	100.708	98.3029	99.689	98.9135	100.647	99.8755	100.896	100.76	100.06	98.8307	99.8345	98.8862	98.2296	98.5718	97.8784	100.064	99.8052	102.028	101.416	100.385	99.8989	100.435	100.73	98.8701	100.715	100.159
5.79	99.8598	99.8775	100.839	99.4266	101.125	99.7496	98.0646	100.345	101.408	99.1718	98.5699	99.6668	101.588	98.871	100.588	98.5326	97.7201	102.798	99.3547	97.3735	99.84	99.9279	98.9	98.8947	100.639	100.474	99.167	100.028	98.7478	100.422	99.7148	99.7638	96.5359	99.1757	99.5758	100.58	100.464	98.1644	99.5413	99.9095	102.248	99.8441	100.108	99.2867
5.82	100.929	100.039	99.4173	99.4933	100.081	99.7639	99.5089	99.2005	100.963	100.359	99.8728	99.399	100.089	98.3195	101.621	98.561	98.3844	101.943	101.141	98.3494	100.402	99.2414	97.6556	99.2058	102.023	99.8198	98.4954	99.2406	99.7005	98.7593	99.6625	98.6557	97.2662	98.8857	99.974	101.99	100.115	97.2492	101.155	98.7084	97.5271	97.686	98.586	99.9407
5.85	100.898	99.0461	101.284	99.3127	100.342	100.039	100.029	101.047	100.856	98.3121	100.876	98.1321	99.0453	99.7946	98.8037	99.1771	99.9381	100.961	101.885	98.6733	102.153	99.5771	99.9158	99.974	100.604	100.151	102.061	98.1056	100.817	97.4614	98.5562	97.9187	97.978	98.0958	99.5903	101.543	98.9629	97.4892	99.557	99.931	99.9774	98.6536	99.9449	100.533
5.88	99.6281	100.173	100.665	100.14	100.026	97.1822	99.9934	100.038	98.6827	99.6593	98.7536	96.823	100.248	98.8719	99.8522	100.112	98.1858	101.185	100.296	98.7208	99.4952	98.2813	98.2834	99.4845	97.3339	100.209	100.225	96.7464	99.581	99.789	101.31	99.4709	96.4273	99.6805	100.113	101.711	100.302	98.6513	98.4762	98.5728	101.062	99.4208	100.115	98.4632
5.91	101.931	100.883	100.333	99.7864	100.715	98.3885	98.9032	99.27	99.5549	99.7968	98.6352	99.4197	100.458	98.0047	98.9198	99.8354	98.5473	102.495	101.502	100.934	100.59	99.2354	97.4076	101.084	101.586	99.164	100.668	99.0439	97.0987	102.666	99.5377	99.0393	99.0336	98.2006	98.6662	100.4	100.903	96.4846	100.999	100.922	98.2359	97.8465	101.042	98.3863
5.94	100.237	99.299	100.618	99.6817	99.3681	99.6823	99.9144	101.284	97.9822	100.102	100.146	98.9978	100.976	98.1204	100.596	102.278	100.031	101.839	101.286	98.8481	100.775	99.0173	99.9896	99.4398	98.9148	100.428	99.3777	99.8062	100.808	100.366	99.1007	99.7378	97.2695	98.7193	100.138	102.58	99.7753	101.703	101.38	100.047	99.1741	97.6184	100.163	98.1975
5.97	100.023	101.432	100.393	99.4342	99.4988	100.167	100.084	98.5561	99.3636	99.9974	99.4316	98.5361	100.389	97.8542	100.574	100.864	98.5989	102.013	99.9415	100.983	99.3022	99.9109	99.6517	99.6438	100.598	99.8638	99.439	99.6648	99.4334	100.98	101.137	101.047	96.749	100.302	98.8377	102.241	100.877	96.7504	101.742	100.81	99.9046	98.8946	98.9821	101.501
6	100.822	98.9661	100.472	99.1812	99.154	99.1081	98.8262	100.083	101.076	100.777	99.2925	98.498	100.05	98.3953	99.4577	98.7541	97.9	103.254	100.273	97.9036	101.817	100.329	98.9302	98.1025	101.005	99.9928	97.9557	98.797	100.768	100.111	99.985	99.5163	97.9702	98.8071	99.0787	101.093	102.949	98.8373	100.937	99.9102	100.134	96.6729	101.539	99.793
6.03	101.22	99.7799	100.931	99.17	99.8499	101.212	101.417	99.8905	101.523	101.742	99.3803	96.8062	99.83	99.1442	99.3631	98.232	98.4055	102.85	99.347	100.574	101.181	99.0908	99.6927	99.1704	102.16	100.475	98.6547	100.597	100.237	99.4502	100.502	101.192	100.948	99.0667	99.4644	99.5729	100.585	99.0993	99.9278	98.8827	99.1021	98.2724	100.306	98.9102
6.06	100.848	99.2793	101.256	99.6788	99.1293	98.4504	99.9196	99.1779	99.579	99.5653	99.6725	98.7091	100.007	98.3384	99.5802	101.077	99.0472	99.1061	102.385	98.4427	99.6776	100.389	98.4956	101.002	100.089	100.794	98.4828	99.2109	98.7113	99.6858	99.5943	99.0646	97.9491	97.7887	99.819	102.929	101.764	96.0297	99.1724	99.0876	99.8164	100.123	99.3111	99.2585
6.09	101.497	99.4958	99.3415	100.796	101.341	99.516	99.0177	97.807	100.204	99.6718	99.8246	96.1859	99.4488	98.4164	100.87	99.9434	98.1502	102.665	99.155	98.0424	100.003	100.87	98.7501	99.8579	101.823	100.96	99.2373	99.9476	101.966	98.4001	98.1113	98.9078	100.511	96.6365	99.9445	101.967	100.756	98.8495	100.922	100.346	99.279	97.0625	100.292	101.252
6.12	99.568	100.432	100.703	100.919	98.8759	100.248	98.9534	99.09	100.744	99.2841	99.4932	97.2932	98.6754	97.0506	100.15	100.75	98.9242	100.268	103.126	98.6472	99.9487	99.6993	97.9277	97.9097	101.177	100.197	99.5971	99.6881	98.5201	100.545	97.7013	100.696	97.7208	97.3718	100.144	102.74	100.086	99.1258	98.1503	100.362	100.907	100.74	101.187	98.1339
6.15	100.207	99.639	99.9755	99.9904	101.05	98.5648	100.678	98.4459	100.085	100.299	98.684	98.2922	100.049	99.8556	100.496	100.432	98.4407	102.123	100.392	98.5731	99.4297	100.485	99.3806	100.473	101.661	99.6883	99.6336	101.853	101.252	100.247	99.1764	100.666	96.3077	98.5797	99.2859	100.59	100.606	98.4925	101.163	100.3	100.046	98.8201	100.556	101.514
6.18	100.397	100.752	100.549	99.4968	99.6993	99.5116	100.27	98.0724	99.6571	99.7163	100.732	98.2584	100.525	97.6122	102.193	99.5239	99.9755	100.534	101.34	98.7452	99.7946	99.6011	99.6626	100.458	104.455	100.189	99.8179	100.611	98.8258	99.5091	98.8105	100.445	97.1038	97.5228	100.191	103.104	101.788	96.9744	100.808	100.152	100.709	98.1363	99.2968	98.4283
6.21	100.624	100.716	101.004	99.8901	99.2925	98.6165	98.4143	99.4509	99.9003	99.2025	99.2271	98.0835	98.6026	99.2705	100.556	100.615	100.907	101.852	100.462	98.9395	100.254	99.6491	97.6396	98.1003	102.628	100.459	100.111	99.5888	94.287	99.6227	98.9808	98.4828	96.6976	100.295	100.295	101.375	99.916	99.0469	102.834	98.3103	100.99	99.5304	97.7016	99.9611
6.24	98.8493	98.4866	101.713	98.9771	99.0833	98.2572	98.5492	100.565	99.5391	100.54	99.4861	98.869	100.99	97.5092	101.791	99.122	99.6447	100.789	100.276	97.7367	100.328	100.232	99.4183	99.375	101.603	99.0534	100.369	99.6807	97.6508	98.5377	100.707	100.934	97.6611	98.4911	99.6678	101.212	99.4987	98.4492	101.472	97.8499	98.1777	99.8111	99.0784	100.804
6.27	100.752	100.243	101.603	100.766	100.615	101.193	97.3724	101.436	100.722	98.8235	98.4069	97.7175	99.1652	98.0894	100.665	99.277	99.0263	101.139	100.049	98.9548	99.7368	99.2904	98.131	98.8735	99.9072	99.6519	98.568	98.2006	98.094	100.183	98.7533	98.0989	96.5962	99.9131	99.9634	99.9187	101.826	97.8686	98.621	100.285	101.433	99.0278	100.784	96.9949
6.3	101.469	100.584	100.4	99.9693	100.231	98.6925	97.7652	101.257	100.096	98.0206	100.443	98.4767	99.9125	98.2588	101.162	100.244	99.2338	100.267	100.177	98.0215	101.399	99.0216	98.2635	99.3853	100.925	99.9342	100.221	100.074	100.072	98.5087	98.4165	97.324	94.7291	97.9729	99.0726	102.672	101.685	96.2891	100.105	101.159	100.752	99.8405	99.2905	100.044
6.33	100.676	99.7006	101.144	98.9638	101.653	99.367	98.8508	100.882	100.03	99.3247	99.1373	98.4942	99.9842	99.6203	101.676	100.456	100.434	100.797	99.8034	99.8569	100.402	99.0893	98.2014	99.6296	102.281	99.8777	98.3764	100.537	99.1627	99.1863	100.809	98.2493	97.3332	96.9308	99.4024	100.614	100.111	100.332	99.3888	98.9248	100.351	97.7076	99.5326	98.9109
6.36	101.806	100.326	100.578	99.7009	100.178	99.7971	96.6061	102.468	99.4856	98.2287	98.9312	98.8957	100.028	98.0057	99.2312	99.7198	99.4168	102.138	100.223	100.55	99.9031	100.136	97.7388	99.0329	101.825	100.726	99.3345	99.9316	98.4832	100.24	99.5829	100.828	97.5457	97.6846	100.263	102.542	100.687	99.0993	101.526	100.136	100.366	99.5113	99.0319	99.8606
6.39	101.607	100.547	100.996	99.9078	100.443	99.6489	99.4248	100.811	99.9143	100.161	98.4966	99.8786	99.1409	98.962	100.085	99.8431	98.6898	103.534	100.892	97.4535	101.763	100.252	98.4331	99.1988	100.649	99.3783	99.5076	97.2774	100.208	101.977	102.292	101.876	98.306	95.6985	99.4137	99.8052	101.375	99.6509	102.469	100.47	101.463	99.0316	99.8438	99.1152
6.42	98.6354	101.099	100.3	100.125	100.75	100.231	98.4577	102.491	100.385	100.078	99.1501	99.9283	99.6542	97.9255	100.606	98.7794	100.028	102.634	101.133	99.5851	98.7822	99.828	99.0334	100.801	101.485	100.293	99.9979	99.5132	98.5748	99.1773	101.595	99.0273	98.0818	99.5894	99.549	101.357	99.3686	98.0737	102.491	101.963	97.1749	98.8888	99.8606	100.018
6.45	101.832	99.5832	100.666	100.08	99.9694	99.3186	97.5495	98.6598	98.2346	100.953	98.7236	98.5333	100.667	98.5764	99.6477	99.9918	98.3831	101.695	100.937	100.314	99.7824	99.3381	98.9764	98.5895	101.08	100.602	98.8245	100.005	97.8446	98.1693	97.6653	100.285	98.1859	97.4997	98.6905	102.57	99.0079	96.87	100.078	99.9944	98.7098	99.1753	100.751	98.7779
6.48	100.973	100.026	100.524	98.9096	99.6757	100.766	98.1368	100.456	99.2265	97.9441	99.7183	100.164	98.9224	98.1852	100.224	100.247	98.7936	100.802	99.7689	99.0119	100.693	99.0744	100.703	100.271	100.467	99.4728	98.1346	99.2937	99.7137	98.2682	103.107	99.1399	97.6158	96.1833	99.3629	102.037	101.084	98.7767	99.6723	99.9808	98.893	100.938	100.072	100.627
6.51	101.51	100.065	101.516	99.8985	99.3744	100.201	98.9068	98.9217	100.136	98.9385	100.571	98.7823	101.368	97.2383	99.9983	100.541	99.7909	102.606	102.872	99.5225	99.3459	98.4909	99.0368	99.3902	99.8492	99.7269	99.0799	98.7555	98.2233	99.6363	102.595	102.541	99.1551	96.9356	99.2395	101.675	99.193	99.3146	101.474	99.9241	100.264	98.4225	99.3067	100.086
6.54	100.038	99.0877	100.112	100.092	100.118	97.0271	98.7697	98.8046	99.5613	98.3674	99.2192	98.1652	101.345	99.2323	98.1297	99.3389	99.9686	100.889	100.751	100.636	97.4761	99.6917	99.1134	99.3159	97.807	99.3374	99.989	99.2156	100.291	100.175	99.669	97.934	97.4195	100.431	100.241	100.326	100.401	95.5523	100.857	100.432	99.6432	97.7364	100.534	100.129
6.57	102.558	101.04	100.377	99.7697	100.183	99.3278	100.403	99.494	101.564	98.2324	99.0581	98.3946	100.322	97.3612	100.1	97.6083	99.0546	101.825	102.208	100.12	101.638	99.8027	99.3811	98.522	102.041	99.7573	98.5247	98.5932	98.4106	100.76	99.8548	97.8961	96.9243	98.7452	99.8334	99.4715	101.605	99.7333	102.806	98.9132	100.81	98.5555	100.251	99.6582
6.6	101.339	99.5023	99.3289	99.4759	100.377	99.9688	99.2174	100.302	99.491	99.9859	99.3123	98.2613	100.206	98.2684	99.5766	100.475	99.9559	101.191	101.248	99.208	98.42	99.1468	98.1855	100.061	102.21	100.121	98.4573	100.181	100.691	100.307	97.1291	102.09	96.9204	98.4457	100.188	99.656	101.371	99.2975	100.931	101.625	98.5149	98.7926	100.072	98.8392
6.63	101.088	99.9143	100.807	99.9911	100.392	100.256	98.548	100.59	99.9726	99.9688	99.5131	97.5976	100.15	98.8558	103.38	99.6683	101.174	101.154	101.164	97.5436	98.2526	99.2085	98.8397	99.2185	101.821	99.5547	99.3717	99.3597	104.183	99.962	97.8461	100.082	94.8947	99.8561	100.537	100.259	101.416	98.3129	100.55	99.8557	100.636	99.8574	98.1044	99.8562
6.66	102.484	100.962	99.4077	100.431	101.475	97.601	98.6731	99.3471	100.226	98.9209	100.345	99.5398	99.9051	97.4852	99.4588	99.4835	99.3932	101.361	100.548	97.7758	97.4963	101.336	99.1472	99.3538	101.847	99.5981	100.028	100.359	98.5527	98.7	99.2365	100.266	99.5456	100.092	99.4087	100.882	101.865	97.7203	99.9979	101.957	100.077	99.3523	99.3679	99.7743
6.69	101.165	100.596	99.6508	98.9515	100.548	98.4378	100.186	98.6377	100.527	100.258	99.8983	98.8468	98.9801	98.1681	101.445	99.7155	100.208	100.627	101.692	99.4691	101.743	100.612	100.243	99.694	102.968	99.4812	100.365	99.24	97.3512	99.0955	97.6183	99.6922	96.053	98.067	99.3589	99.4966	98.3993	96.8008	100.736	100.435	100.637	99.1479	100.319	99.3359
6.72	101.242	99.7678	99.1654	99.6353	100.201	100.404	98.129	99.7315	100.917	98.5104	98.1941	97.4997	99.3707	97.6704	99.2454	100.987	99.7193	101.949	102.027	97.9421	99.2296	99.2746	99.075	100.045	101.385	99.5166	100.489	98.7265	101.435	100.778	101.093	101.302	96.3542	98.393	99.5673	101.614	102.17	97.1486	100.311	99.3049	100.017	98.3708	101.646	100.975
6.75	100.981	100.951	101.538	100.164	100.627	98.2409	100.483	99.451	98.3724	100.624	98.7785	98.9978	100.945	99.0456	100.271	100.292	100.97	103.067	102.194	97.5087	100.991	98.8901	99.5437	101.058	102.28	100.46	98.6535	100.255	97.9543	98.0061	101.605	99.4409	96.4418	98.43	99.8499	99.8996	102.695	97.2551	99.2903	99.1947	101.189	98.8726	99.7773	99.3517
6.78	101.191	98.618	99.7898	99.7797	99.8491	100.541	97.9481	99.6324	99.9082	98.7551	99.5532	98.236	98.9178	98.546	101.115	101.075	98.0902	101.125	101.662	99.1921	99.8804	100.404	99.2146	101.146	101.301	100.595	98.9745	99.7229	98.9278	100.458	101.168	99.4188	94.8392	100.479	99.5065	102.403	100.024	96.2002	100.958	100.856	100.846	98.074	100.298	99.0793
6.81	101.865	100.163	100.576	100.311	100.251	100.183	99.2018	99.1898	99.1818	99.8167	100.027	98.8101	100.973	98.3709	101.308	100.193	101.436	101.931	97.7508	100.376	100.475	100.019	98.3563	99.775	102.814	100.353	99.1879	100.856	97.153	99.1048	98.7314	97.7685	96.8894	98.4253	99.2673	99.5471	100.651	97.2785	100.252	99.0231	100.508	98.3536	101.376	102.435
6.84	100.281	99.3283	100.659	99.9237	99.4097	100.225	99.9118	99.2394	99.6584	100.397	99.3448	97.3137	99.5877	99.4599	100.147	101.569	101.39	102.682	99.0469	101.006	101.818	100.493	100.304	99.4328	100.124	100.663	100.395	98.6208	98.3877	99.4733	100.869	101.118	97.6729	101.914	99.624	102.837	99.4884	97.8549	101.882	99.9057	98.3756	99.2232	101.399	99.2061
6.87	99.5745	98.9654	101.083	99.9065	100.253	99.1361	99.434	98.9639	101.448	101.254	99.1754	98.1058	100.473	98.8616	98.5203	100.343	99.6	99.9485	100.544	99.4736	101.374	100.809	98.2271	99.6169	100.222	100.79	99.5968	99.2733	100.044	99.1851	99.2523	98.7745	96.4521	99.0764	99.5629	101.152	100.196	98.2737	100.242	99.2447	101.496	97.5888	99.6063	99.7969
6.9	100.612	99.9585	101.89	99.4344	100.496	98.718	98.9688	101.012	100.464	100.398	98.6063	96.9716	99.4507	98.4832	102.269	99.9978	98.2457	102.843	101.073	99.6228	101.077	99.2985	99.8924	101.112	100.505	99.8101	99.4058	100.581	99.773	99.2031	98.246	100.83	97.8849	100.2	99.4462	100.689	99.3518	98.0428	101.924	101.024	100.391	98.5729	99.9077	100.262
6.93	100.569	99.6194	101.619	98.2787	100.499	98.8782	98.047	98.3414	100.135	99.5081	98.607	99.388	101.118	98.5307	98.3072	98.634	98.0677	101.623	99.649	96.8969	101.112	98.7729	99.2139	99.0095	99.9208	99.5625	99.6957	98.9238	100.364	99.5357	101.116	100.283	97.1183	102.357	99.4294	101.07	101.004	96.4867	100.473	100.34	99.833	98.8476	100.977	99.1032
6.96	101.222	100.669	100.64	100.088	99.4555	100.696	97.5894	99.6131	99.2458	99.8559	99.4381	98.4834	100.4	98.6182	99.107	99.2574	98.2618	101.446	101.815	99.2697	99.7535	98.3674	99.5766	100.923	101.487	99.3997	98.7792	98.9104	100.938	99.2808	98.5786	97.5201	98.5067	98.7305	98.3275	101.153	101.068	97.7719	98.6216	98.4353	100.625	99.9625	99.7401	101.145
6.99	101.221	98.8718	101.486	99.4887	99.3468	97.6224	98.9472	102.141	99.6116	100.083	97.7999	99.2819	98.891	98.7531	100.609	98.3667	99.8376	101.435	101.383	100.37	99.409	100.492	100.029	97.9428	99.9191	99.1068	100.371	99.8995	98.69	99.6659	99.4624	100.743	97.8255	98.6267	99.71	100.881	99.6461	97.9541	101.539	100.892	100.184	99.0169	99.0157	98.0947
7.02	102.361	99.8261	100.219	99.3547	100.72	100.987	97.5815	97.9044	98.5827	97.9249	99.949	100.536	99.8075	98.4525	98.9043	100.059	101.329	102.109	100.051	99.8067	100.29	98.3189	100.156	98.7238	101.586	99.123	99.5271	97.0225	99.4627	99.3812	99.2955	100.615	99.2754	98.8223	100.452	101.804	102.991	98.1179	102.373	99.7062	98.931	96.7796	100.716	100.516
7.05	100.624	100.461	100.914	99.5523	99.5122	99.8221	97.0024	98.6275	98.8626	99.3787	98.9741	97.6666	100.106	98.1929	100.886	98.4927	99.7344	101.69	101.249	98.435	98.7128	100.714	99.9661	98.4008	100.784	99.8945	99.1533	98.538	98.3843	99.1484	99.9346	102.37	97.5824	99.6561	99.6831	100.181	101.179	99.5381	98.9939	100.264	101.404	99.6735	98.9524	100.018
7.08	100.782	99.6511	100.79	98.107	100.421	99.7873	99.3189	100.055	99.892	101.01	98.9144	97.1076	100.939	98.3036	101.028	98.3079	98.3572	104.352	101.293	98.7281	98.4142	99.3101	100.138	100.038	99.3301	99.2416	98.8901	98.1642	101.497	100.833	102.181	99.3489	99.7496	96.2947	99.3321	102.081	99.4593	99.5482	100.285	100.829	100.131	98.637	98.6148	100.732
7.11	100.208	100.509	102.076	99.4245	100.429	100.169	98.6399	99.1756	99.9699	99.2308	99.0615	99.3427	101.674	97.055	99.2706	99.7723	98.1765	99.2535	100.131	98.2574	98.7736	98.5049	98.3198	99.3517	102.173	99.9129	100.334	100.554	99.3742	100.874	101.817	101.451	98.4756	99.1869	99.3536	100.986	101.09	98.6716	99.3475	100.019	99.9727	100.183	98.7604	100.429
7.14	101.309	100.568	101.226	99.2385	100.017	99.1258	98.2232	99.1927	99.0497	99.1809	99.7293	99.1573	100	98.5573	100.703	99.5968	99.9888	101.118	100.977	99.1828	100.99	99.0251	100.218	99.5525	100.115	100.708	97.9468	97.1898	98.4732	101.26	98.409	99.2223	99.8609	99.9237	98.7885	101.275	99.979	97.2226	100.611	100.345	101.466	97.4514	99.2329	99.6068
7.17	100.747	100.28	101.985	99.049	99.862	98.8222	99.2643	98.8975	98.4982	99.3296	100.075	97.9292	99.2176	98.9023	98.3457	99.8688	98.9392	100.929	100.34	97.9698	99.5674	98.6972	100.084	99.5055	101.391	101.158	99.8753	98.2197	98.624	98.6942	100.406	98.3398	97.1853	101.778	99.462	100.778	100.112	98.1211	100.001	100.151	100.912	99.6706	97.5185	100.025
7.2	102.398	98.9621	100.913	98.8009	99.3357	99.491	98.611	98.41	102.027	100.099	99.8981	99.0781	101.141	97.6756	99.7348	98.6889	100.075	102.335	102.276	98.6927	100.13	100.453	98.7914	97.964	101.571	99.7435	100.141	99.9133	100.926	100.718	97.9289	99.4154	96.7639	97.2521	101.318	102.129	101.77	97.3294	99.2887	99.5827	99.3411	99.4781	99.9714	98.6767
7.23	100.413	101.165	101.172	99.8364	100.545	99.6548	100.969	98.0815	99.5249	98.3711	100.113	100.533	100.349	98.6597	100.061	97.5979	98.8991	101.963	102.137	98.4395	98.9098	99.4617	99.0052	99.1321	101.3	100.006	98.5585	99.7338	98.5319	100.303	97.5507	98.9948	95.5209	99.2249	98.85	100.652	100.369	98.5297	99.7806	100.698	98.2334	100.306	99.0851	99.8866
7.26	102.469	100.767	100.512	100.26	100.164	98.9672	98.7923	99.3783	99.8431	99.9132	100.836	98.9135	100.694	97.1798	100.173	99.4953	99.9966	100.257	100.418	99.8314	98.9595	100.782	100.625	100.26	102.684	100.333	97.6867	99.1274	101.337	99.1464	99.8577	100.232	97.2382	98.5832	99.0652	102.384	100.097	98.4902	98.5108	100.898	97.0474	98.4766	99.9522	98.682
7.29	101.26	101.464	101.278	99.48	100.356	98.7674	99.8756	100.178	100.885	100.313	99.0069	98.7361	99.6528	98.8938	99.8348	100.288	99.3338	101.669	100.552	100.101	101.077	100.67	99.2363	99.4865	102.557	99.0475	98.8955	99.2569	97.9448	98.3819	100.889	98.2908	97.0882	101.111	98.9543	101.376	101.765	96.3787	99.492	99.5983	100.636	99.6011	100.573	99.8654
7.32	101.126	100.547	99.4882	100.398	100.5	100.289	99.7352	99.2882	101.507	100.524	99.7137	98.3223	98.7913	99.4869	99.7395	99.6551	101.102	103.013	100.146	97.5689	99.9792	99.003	100.541	100.806	102.107	100.664	99.6676	97.4152	100.969	99.7105	101.42	98.6154	96.4529	97.6784	99.1145	98.7714	100.761	97.1116	101.153	99.6758	99.3412	98.3001	101.446	100.219
7.35	101.836	101.05	100.616	100.008	100.087	99.4946	98.9686	99.3692	101.317	100.062	99.2996	99.5232	100.33	98.5111	102.538	98.7865	97.6445	103.007	100.705	98.148	99.1463	100.139	98.3475	98.2362	101.822	99.3933	100.77	98.0063	100.06	98.3629	99.5184	98.3913	98.1232	98.4911	98.8014	101.83	99.4655	98.4569	101.349	101.322	99.1224	98.5239	99.9489	97.6374
7.38	101.239	100.207	100.809	100.512	100.361	99.335	99.8664	97.772	99.9566	99.6976	99.2281	99.087	100.96	98.695	102.164	98.2084	99.4907	103.161	100.39	99.3949	101.167	99.8402	97.9688	99.7027	102.745	100.085	100.416	99.0511	97.9312	99.2658	100.523	99.6644	97.6113	99.593	98.9145	99.8143	102.411	98.4885	100.538	101.253	101.803	98.5505	101.573	99.4006
7.41	101.904	98.128	100.003	99.5561	99.9758	99.491	100.252	98.5619	99.3834	99.9533	98.957	98.6962	99.813	97.8705	100.171	100.263	97.6676	101.244	100.065	100.585	99.8935	99.4153	97.8816	99.5967	101.41	99.8411	99.2552	99.9053	96.8321	100.293	100.923	100.267	96.6016	97.6107	99.5782	99.9009	99.8254	96.3599	100.269	102.115	99.5936	97.0763	98.6885	98.2923
7.44	100.71	100.227	99.1407	99.3777	101.107	99.5369	100.002	98.854	98.742	101.171	98.7059	97.8786	98.4802	98.4553	100.851	100.03	99.7638	102.519	101.111	97.2633	100.238	98.7688	99.7449	100.561	100.647	99.8217	99.6173	100.443	98.3816	100.815	100.762	100.205	96.7323	99.1009	99.4788	101.072	98.9717	96.505	101.805	99.6883	99.0102	98.448	98.8238	100.837
7.47	100.194	99.7399	100.653	99.7711	100.395	99.0445	99.2938	99.5549	99.8771	99.1256	98.7261	99.5842	100.538	99.1946	99.5766	100.8	99.7213	100.612	101.247	100.1	101.399	99.5886	98.3113	99.8826	100.247	101.329	99.065	99.7355	99.631	100.193	99.1956	98.2422	98.8567	98.9869	99.7367	101.067	100.906	95.8371	99.6996	99.0015	100.3	98.6062	100.617	99.3277
7.5	101.42	99.9163	101.167	99.3871	100.208	99.674	98.7417	99.5602	98.4221	99.6048	98.9558	100.089	101.565	97.8219	99.0873	99.0105	98.2934	101.053	101.829	99.0203	98.7737	99.2825	98.3998	101.004	101.774	100.747	97.4497	98.3821	99.9148	100.723	101.159	100.295	98.225	99.2804	99.9422	101.199	100.903	97.7276	101.563	99.5999	101.009	98.9615	100.62	99.0312
7.53	100.758	99.6614	99.247	99.4978	99.9324	100.811	98.5014	99.9151	100.38	98.1493	100.734	100.177	100.887	97.8369	99.8954	99.5567	98.6824	100.457	102.278	97.841	99.1475	97.8689	98.783	98.788	102.978	100.596	99.2909	100.12	99.7255	99.4517	98.3696	99.9788	99.0829	97.8027	99.9489	100.518	101.49	98.206	99.891	102.127	101.651	98.7633	99.1377	98.7444
7.56	100.292	101.027	100.964	100.575	99.9479	98.7322	96.5487	100.035	99.2831	99.3846	99.5766	98.723	100.28	98.4133	99.4757	99.758	100.41	102.279	99.8156	98.3659	100.744	98.9001	98.8677	100.514	101.348	99.3477	98.7751	99.8377	97.6931	100.158	97.9343	102.443	97.8636	98.3137	100.557	99.3183	100.839	98.197	101.785	99.7894	99.931	98.677	98.2423	99.3899
7.59	99.7561	100.297	101.391	99.8416	99.1868	100.209	99.1833	100.178	99.1486	100.207	99.8575	96.4249	100.517	98.1573	102.269	95.7389	98.6962	102.007	101.538	99.0787	98.8664	100.496	97.6588	99.4553	101.374	99.9982	98.8304	99.4315	98.9734	100.125	101.545	101.391	97.9701	101.418	100.287	101.641	100.951	98.2748	101.274	100.766	97.7223	99.5487	98.5583	99.9099
7.62	99.563	100.538	100.964	100.424	99.7292	99.8632	97.3961	100.902	98.8846	99.8948	100.779	99.5507	99.4221	97.5319	101.599	99.5569	99.4247	102.368	100.05	99.4437	98.8769	99.4797	99.4905	97.2562	102.269	99.8571	97.8573	100.406	100.765	99.4007	97.8303	100.769	99.0677	97.9555	99.6788	100.922	102.753	100.609	99.8557	100.426	99.772	97.7249	99.9375	99.7102
7.65	101.208	99.7182	100.772	100.855	100.09	97.9687	96.6798	97.6716	99.427	100.309	99.9943	97.6485	101.956	98.3614	101.089	99.766	97.6143	103.044	100.859	98.2964	98.9158	97.9466	99.2599	99.38	99.6288	100.391	100.372	97.7779	96.7869	99.9932	100.132	99.9912	96.8977	98.1999	100.011	101.658	100.419	100.594	101.379	98.8221	99.9485	98.6275	99.1305	101.498
7.68	101.62	99.4908	99.8987	99.6299	100.012	99.5396	98.1684	98.2088	100.241	100.267	98.8923	100.585	100.274	98.2039	99.2449	100.349	100.286	102.578	100.566	99.6933	99.6394	98.8403	99.6635	97.4435	101.223	100.278	100.562	98.3066	99.1983	98.8177	99.4186	99.7192	98.4472	99.348	99.4529	98.6971	100.557	97.3255	102.125	99.9812	99.4489	98.0353	98.5969	100.53
7.71	100.955	99.2438	99.6659	99.7022	100.12	101.454	98.8914	99.9992	100.584	100.98	98.6597	98.1325	99.5957	98.2417	100.864	99.0045	99.0527	101.509	101.252	98.8641	100.17	100.03	99.6312	99.0034	99.7721	100.632	101.041	98.7415	98.161	100.473	98.637	100.508	100.001	98.9665	99.8958	99.59	101.097	99.5819	98.9483	99.9601	100.047	98.8279	99.5217	98.8853
7.74	100.758	100.672	99.3511	99.1359	100.315	101.328	99.1899	99.0184	100.625	100.437	98.8757	99.3353	99.8261	97.7426	99.6559	99.7993	98.155	101.794	99.5837	98.5717	99.4261	100.32	99.1401	99.5512	102.553	100.855	99.7649	99.3564	98.1438	100.19	100.365	98.7144	97.2215	99.5901	99.5547	101.65	101.426	98.4142	99.7275	100.777	100.053	99.6615	99.9986	99.8405
7.77	101.15	99.8416	100.529	100.83	99.5863	99.2446	98.7658	98.1513	98.7623	100.229	97.9858	97.7832	99.3927	98.2302	100.44	98.505	99.0873	101.14	102.334	97.7465	100.313	100.635	99.5494	102.027	101.855	99.9588	99.3154	98.7851	97.6999	101.043	97.7401	100.268	94.8496	100.361	100.066	100.155	100.254	96.5387	100.342	100.152	101.198	98.2668	99.7902	98.4495
7.8	101.237	99.4663	100.119	99.8623	100.994	101.15	98.8436	100.496	100.898	98.8077	99.88	98.1636	99.4975	98.1462	100.427	99.0656	99.5495	101.034	100.949	97.9664	99.7783	100.401	98.4259	99.1533	101.787	100.437	99.6611	99.2362	99.826	98.308	99.2294	102.052	97.3144	96.5957	98.9895	99.0844	100.887	92.6894	101.552	100.894	100.529	99.0697	98.9302	100.396
7.83	101.37	99.7125	101.652	100.192	99.5931	99.3388	95.2973	101.422	99.2048	99.7448	99.6105	98.0258	101.32	98.1331	100.193	101.391	100.291	101.126	100.993	100.321	101.007	98.6834	99.0623	99.8502	102.1	99.6306	98.5046	99.8354	99.5039	100.045	100.217	98.9171	96.6308	99.5479	100.103	101.357	100.357	97.7381	100.639	100.563	99.1635	97.0752	101.074	98.7793
7.86	101.048	100.564	101.097	100.718	100.806	101.207	99.5237	98.7478	99.5924	99.6204	99.9717	98.5208	100.73	98.413	100.337	99.1444	99.9886	100.571	100.226	98.9816	99.5376	98.4231	97.7781	99.8913	100.589	99.9268	99.8983	98.6845	100.271	101.073	98.4424	98.2178	97.5174	99.4612	100.065	101.013	99.2333	97.0347	101.401	98.7734	99.4032	98.283	100.713	99.45
7.89	100.174	100.395	100.475	100.155	100.048	101.196	96.5484	100.368	98.7505	102.347	98.8677	99.1173	99.2882	98.4837	102.209	99.4159	98.0185	101.565	101.67	101.365	100.554	99.3595	100.482	100.21	101.026	99.8065	99.2039	99.2455	100.648	98.1578	99.8873	99.1376	97.3679	98.9275	100.866	102.01	98.6718	99.413	100.431	100.797	99.2374	98.9078	100.273	99.8552
7.92	102.364	99.6232	99.8124	99.5477	99.5937	99.9106	99.6109	100.608	98.2053	101.089	98.6393	99.043	100.757	97.6037	102.44	98.8484	101.002	103.083	101.583	98.2988	100.238	99.2302	98.3505	99.8479	100.272	100.843	100.283	100.735	101.871	99.4284	102.208	98.7821	96.1939	96.207	99.6048	100.925	100.248	98.4277	101.015	100.268	102.327	97.1726	99.5504	100.811
7.95	102.672	100.106	100.667	99.8067	100.484	100.681	100.774	101.525	99.9122	99.0943	99.0784	98.8548	100.976	97.6754	99.9261	101.328	98.4418	100.475	101.683	97.7088	99.0004	99.1732	100.186	100.951	102.876	99.4642	99.6388	101.719	97.3815	100.126	103.511	99.2322	97.4954	97.4579	100.335	101.169	98.7517	97.0616	101.052	100.258	98.9642	99.1293	99.5724	97.4721
7.98	100.423	101.381	100.317	100.467	101.109	100.398	98.1452	100.396	99.4246	100.273	99.5602	98.8127	99.2077	97.9063	100.149	98.9068	100.263	101.054	100.493	100.292	99.3678	100.314	99.6144	98.5045	100.444	99.7423	99.5301	99.3909	101.34	99.9016	100.968	99.2031	98.0474	96.4899	99.8027	99.8609	98.7555	97.8361	101.606	101.591	98.924	99.7644	101.436	100.562
8.01	102.61	99.564	100.511	100.08	98.6821	99.5679	99.1497	98.3188	100.975	98.1752	100.757	98.0228	100.192	98.3729	98.6304	100.28	99.5893	101.258	98.9071	98.5767	98.5568	99.9279	99.1392	99.4583	99.5126	99.4804	98.6043	101.485	100.638	99.3007	98.5848	102.74	99.9782	98.9478	99.7432	100.979	98.8752	97.2104	99.9754	100.243	100.01	98.7485	99.7148	98.9963
8.04	102.004	98.9593	99.672	99.7904	100.063	100.014	99.8792	100.171	98.5101	100.187	99.9781	98.6644	100.181	97.3864	99.9949	99.1838	100.504	98.9873	98.8588	96.5068	99.0195	99.7791	99.8737	100.138	100.948	100.722	100.147	98.7186	98.9851	97.7208	98.8023	102.36	97.7442	101.751	100.041	99.2188	100.735	96.7124	100.045	100.655	97.8733	98.5699	98.7614	98.8655
8.07	101.362	99.9072	100.382	100.594	100.504	101.25	100.572	99.1919	99.9449	99.679	99.9888	98.232	99.022	98.8906	98.4222	99.9971	100.076	103.28	100.898	98.4146	100.036	100.312	99.2474	100.489	100.38	99.096	99.5657	100.329	100.169	99.3376	99.6515	100.756	99.2046	97.8818	99.2532	98.8367	99.4329	96.9151	100.482	101.303	100.568	99.3984	100.174	97.5725
8.1	101.274	100.728	100.951	99.693	100.283	100.473	98.4887	98.8103	99.4811	100.15	98.0114	99.2982	99.7826	97.5058	102.182	99.3118	100.661	100.547	99.9726	98.6611	98.3362	99.4072	99.9971	99.8382	102.433	100.168	100.784	99.2116	99.9658	100.957	99.3719	100.718	100.232	100.289	101.062	101.869	100.208	98.5836	102.072	100.359	98.4272	98.9265	98.1564	101.889
8.13	101.311	100.638	100.133	98.3159	100.035	100.779	98.5276	99.5259	99.0061	98.2155	98.7152	100.116	99.5084	98.2999	99.3554	98.4271	99.6736	101.37	99.9526	98.2275	98.5639	99.7279	99.2088	98.5779	99.6888	99.983	99.3706	99.56	98.3276	99.1595	98.8164	100.256	99.3327	97.8908	99.1349	101.235	99.603	98.2646	101.796	99.7259	100.727	97.2316	98.3703	99.2796
8.16	102.608	98.9294	100.923	100.74	99.6185	101.384	99.6215	100.862	98.3382	99.3901	98.9425	98.4735	99.2782	98.2722	99.0562	100.671	98.4564	100.639	101.541	99.5939	100.692	99.7002	100.242	101.457	100.399	100.2	98.2666	98.8494	100.763	99.5954	100.998	100.477	98.4411	100.488	99.8231	101.335	99.5532	98.3325	103.122	101.08	99.2991	97.557	99.6228	100.085
8.19	101.099	98.7958	100.925	99.7526	100.419	101.551	99.0024	99.6983	100.734	100.162	99.4492	97.8004	99.9029	98.0038	99.8875	99.0423	101.303	102.835	99.6614	98.5491	99.7723	99.6856	98.915	99.8189	97.6075	100.014	99.5097	98.7144	99.5771	99.8862	100.107	99.1934	98.3029	97.5735	98.663	100.791	101.302	99.0127	99.8874	99.6661	98.6926	98.4419	97.9168	97.6954
8.22	99.5875	99.9591	100.238	100.547	99.2899	100.764	99.2342	99.6864	100.324	100.636	98.3167	98.8294	99.4851	97.1471	99.8248	99.288	99.9838	99.0763	101.002	97.9998	99.4549	98.8594	98.9367	98.0876	100.027	99.8216	100.257	98.8368	99.7899	99.2032	100.071	98.344	95.4563	99.3307	98.95	101.169	101.731	99.7997	99.7052	100.664	101.697	98.4982	99.2264	99.1953
8.25	100.11	100.747	101.759	100.915	99.6102	100.144	97.7608	100.457	99.6868	97.6586	100.86	98.3444	100.186	97.8751	99.2245	99.883	98.0212	101.891	99.7921	98.4429	101.481	98.5933	99.0425	97.5609	99.6654	100.075	99.6857	100.217	98.9618	99.4902	97.7472	99.5217	96.1171	99.5763	100.41	98.7395	100.442	99.9162	100.389	100.058	100.638	98.7341	99.9059	96.3881
8.28	100.877	98.5338	100.781	100.794	100.209	99.6329	96.7946	100.041	99.0126	99.8672	99.6954	98.7699	98.6344	97.6938	103.606	100.423	98.6063	102.039	101.805	98.5217	100.557	100.853	99.2158	100.498	100.418	100.324	99.5005	99.7169	99.94	99.2661	98.6196	99.2349	97.7203	99.4865	99.4795	99.6177	100.883	99.2065	101.182	101.481	101.469	97.5694	100.092	100.119
8.31	101.575	100.447	101.152	100.64	100.45	100.796	99.7888	100.489	100.079	100.831	99.3979	100.2	100.416	98.3556	100.48	99.0973	99.7595	102.581	101.712	99.5155	98.8619	100.966	98.1392	99.1753	99.894	100.22	99.4413	100.399	98.7926	99.2766	98.4389	96.8419	96.1013	100.179	100.435	100.186	101.722	96.9628	99.0282	99.4543	100.188	98.2284	100.492	102.514
8.34	100.083	99.577	100.602	100.563	100.966	100.413	98.5403	100.658	99.5997	98.7675	98.2378	99.2489	100.889	98.4496	100.154	99.1515	98.4082	101.371	101.03	98.2928	100.294	99.7375	100.413	97.3601	100.877	99.5081	99.712	99.0107	101.538	99.8793	99.9413	100.556	96.6843	100.211	98.8948	101.019	98.8801	97.6138	99.7948	99.8614	98.9922	98.3676	98.1352	98.3033
8.37	101.215	98.953	101.457	101.498	99.5318	98.7716	97.973	102.116	99.871	99.809	98.6539	99.704	98.8903	97.9803	101.661	98.6851	98.5225	103.832	103.051	99.498	98.6678	98.4178	98.1004	101.573	102.037	100.153	98.9283	99.8798	99.0661	98.7697	100.077	97.8514	99.0705	97.0867	98.9458	100.652	99.8969	97.1368	101.402	97.8844	98.1552	99.0669	100.19	100.554
8.4	101.959	99.8285	100.844	99.7571	100.849	100.266	97.9639	99.8466	99.4395	99.1981	100.522	99.4077	100.44	97.9438	100.422	101.265	99.2199	102.423	101.702	98.8558	99.3953	99.3888	99.1299	100.773	101.736	99.8458	98.3659	100.612	98.7954	99.5716	100.104	100.738	97.3216	100.188	99.7163	100.433	100.501	97.1758	100.685	99.3907	99.4985	98.3505	100.918	99.9033
8.43	101.21	99.7517	99.3446	100.056	98.8812	99.5265	99.1352	100.475	100.579	100.175	98.2959	98.5273	100.315	99.0292	99.0408	98.909	98.5958	101.655	100.685	97.1914	99.0579	99.489	100.181	100.295	101.698	99.8878	99.8197	98.6593	101.215	98.7333	98.7215	101.686	97.6523	99.6214	99.5536	102.046	100.266	96.4921	98.972	100.178	100.529	98.6805	100.565	101.927
8.46	100.826	100.642	100.62	99.8946	99.6899	100.447	98.3847	98.9144	98.5059	99.1411	98.7562	100.671	99.1045	97.484	101.171	98.1068	100.325	101.416	101.702	98.9136	97.0483	99.5473	98.9023	100.345	102.28	99.4935	99.1661	100.037	98.491	99.5465	100.499	99.8407	97.7029	100.431	99.1948	100.039	101.641	96.6098	100.933	100.243	99.3655	97.9703	99.9572	98.5615
8.49	102.892	101.185	100.592	100.484	99.3821	99.7003	98.7788	103.387	99.5552	99.8913	98.6537	98.3941	100.311	98.6839	101.429	100.391	98.2549	102.331	100.409	98.8808	98.2315	98.6629	98.9161	100.94	101.454	99.2992	99.5271	99.1024	98.112	99.9154	100.164	99.4953	97.1534	98.2097	100.634	99.6179	99.6288	95.858	101.527	99.4139	98.8415	98.2001	100.517	101.413
8.52	101.773	100.444	99.8707	99.076	100.479	98.21	99.8479	100.508	98.7134	97.6937	97.6609	97.7245	99.4621	97.3593	101.917	100.451	99.9256	102.233	100.2	98.7411	98.7176	100.796	100.154	99.1691	101.829	99.9399	98.9861	99.8995	100.624	100.843	99.7228	100.521	98.2227	98.3699	99.0702	100.936	99.72	97.9421	98.9115	99.0459	98.6021	98.7712	101.914	100.305
8.55	100.598	98.9527	100.603	100.95	99.2761	99.0143	97.9669	99.7141	97.9736	99.1811	98.4849	97.7332	98.9907	98.601	100.16	98.455	98.2372	99.4989	100.905	99.0076	99.1869	100.08	98.3417	99.3368	101.032	99.7116	100.703	100.224	100.513	99.8723	96.6496	99.8886	97.0413	97.0191	99.1589	101.844	100.013	96.9084	100.033	101.475	98.2681	100.666	101.496	100.822
8.58	100.536	100.482	100.05	100.824	99.8497	99.348	99.253	97.5206	99.8691	98.8262	98.8125	98.3951	99.9119	98.1685	101.359	98.9302	100.812	103.047	101.678	97.9845	99.3239	99.58	98.5731	97.5703	101.277	101.29	98.8927	100.552	98.5015	98.1413	99.5818	102.758	98.813	99.1189	99.3218	101.819	98.9735	96.8108	101.112	99.8801	97.7759	100.324	97.3356	99.4997
8.61	101.615	99.542	101.391	100.206	98.7345	98.9129	98.0939	100.965	99.5045	99.0398	99.8238	98.1299	99.0539	97.5391	99.9826	99.5369	97.412	102.255	99.5593	99.9112	100.009	99.1367	97.7131	98.2624	101.23	100.208	97.7698	101.022	98.3043	99.5404	98.5818	102.263	98.8639	98.4389	98.9853	98.5845	99.2493	97.0573	101.157	99.0005	99.0549	98.2479	99.9122	99.4761
8.64	99.4828	99.8467	100.631	99.5701	100.693	100.433	99.6529	99.7996	99.4798	100.66	100.392	99.5291	100.554	98.8481	99.9762	97.1547	100.717	101.696	100.373	97.7462	99.9919	99.7087	98.2351	98.9159	99.0019	99.3431	99.0856	99.5974	100.785	98.5814	97.6893	99.7092	97.5513	97.9383	99.6566	101.258	100.328	99.3543	99.6727	100.392	100.203	98.3373	97.8611	97.4627
8.67	101.526	100.607	99.4525	99.6936	100.004	101.129	97.948	99.6629	100.693	99.5161	98.6588	100.344	98.8174	98.0335	101.333	100.315	97.6354	100.131	100.881	98.7263	99.0209	97.8496	98.4156	100.001	98.8723	99.7532	99.3258	98.3787	97.6909	101.027	98.7097	100.994	95.5001	99.4437	99.8957	100.493	101.403	98.6039	99.2481	99.86	98.7001	98.5592	98.3829	99.4892
8.7	98.2292	99.2673	99.2847	100.584	100.321	100.781	97.7577	99.3873	99.7208	99.1137	98.8289	98.4861	100.868	96.8765	100.555	100.396	99.9776	102.758	103.113	97.5913	101.008	99.0937	100.694	99.4886	100.067	99.0786	98.7158	100.901	99.1816	99.3096	97.5213	101.775	97.4783	99.0282	99.5794	102.386	101.421	99.5656	100.297	99.5467	100.669	97.8152	98.6842	101.614
8.73	101.129	100.617	100.207	100.033	100.707	99.9482	98.6073	99.2734	100.005	100.251	99.3761	98.2142	99.6466	96.3208	101.416	97.9797	99.3932	102.378	101.073	99.4418	101.005	98.9655	98.9802	98.8941	98.318	98.6406	98.4876	99.2541	100.639	99.1471	99.4229	100.043	97.8797	99.4809	99.7572	101.549	99.9293	99.0005	99.2425	99.9632	99.3654	98.939	99.3002	99.0992
8.76	100.383	100.309	99.4575	99.1233	101.078	97.4637	99.1046	99.2491	99.9226	100.453	99.4432	98.3886	100.533	98.51	100.224	99.0509	99.3848	103.081	100.703	99.8712	100.439	99.3523	99.4553	97.5021	98.8177	99.9448	99.9053	98.417	100.028	98.2507	97.9417	98.2133	96.1644	96.7006	99.5847	99.0354	99.1508	98.2546	100.004	99.6054	100.298	99.0561	100.025	98.4209
8.79	100.783	99.2516	100.037	98.8156	99.8835	99.4243	99.2317	98.7541	99.2701	99.7294	99.2253	98.8183	99.5075	98.731	99.793	99.1944	98.4196	100.791	101.559	99.9398	100.963	98.5669	97.5191	98.3327	98.8448	100.336	99.2815	99.5937	101.46	99.8811	99.5556	98.5045	97.6769	100.241	99.1884	100.073	101.687	99.9813	98.9718	98.98	100.416	98.6784	98.7866	100.075
8.82	101.993	100.656	99.5119	99.6206	99.6979	101.024	97.618	98.7058	99.5587	102.368	97.9644	100.811	99.1863	98.2743	101.207	99.9927	100.392	101.033	99.1666	100.038	101.049	99.3021	99.6192	100.348	98.8163	99.9759	98.2908	96.7101	100.289	97.7548	98.3562	95.5763	98.13	99.9564	99.583	101.367	100.613	99.4031	100.156	98.0365	100.282	99.2269	100.052	98.1837
8.85	100.925	98.5345	100.024	99.5123	100.278	99.6719	98.3527	98.6997	101.245	98.8121	99.516	100.062	100.417	98.4717	100.106	99.6013	99.7076	103.061	101.635	98.6088	98.991	100.558	98.8015	99.8963	100.754	100.308	97.9361	99.9178	98.025	99.191	99.8829	99.3202	96.5819	101.38	99.2726	99.1065	100.682	97.7349	99.4918	99.7868	99.8903	98.822	101.428	102.08
8.88	101.436	99.5413	99.8924	99.0256	100.042	99.0185	96.8808	99.8719	98.7109	98.3288	98.1422	98.2011	100.553	97.9897	100.406	100.801	99.6946	100.776	102.86	99.5679	98.2138	101.409	98.4719	99.917	100.996	100.749	99.5158	97.9428	98.2704	98.4401	98.6396	97.9732	96.9104	98.051	100.757	98.9799	101.549	98.9889	99.3712	101.377	102.222	97.1085	100.558	99.3276
8.91	101.036	101.459	100.89	100.85	100.165	99.9954	98.5343	98.9589	98.8044	99.3745	98.7982	99.5861	100.666	97.7903	101.55	98.8087	100.94	102.785	100.864	98.0165	99.7385	98.5648	99.0174	100.203	99.933	100.098	99.4362	99.3069	100.399	100.159	99.7172	99.2904	96.4117	95.4937	99.295	99.3481	99.7792	96.5476	97.5408	99.4015	100.066	98.7542	99.9314	99.5855
8.94	100.505	98.6966	100.933	100.764	99.8586	100.227	96.3943	100.102	100.216	99.3936	99.3983	100.02	101.355	99.0344	98.389	100.755	98.2563	101.154	100.748	98.264	99.1615	100.603	98.3372	99.7539	99.4246	100.239	99.2665	98.2234	99.6925	98.4974	100.25	98.7543	94.4845	97.6362	99.4587	101.555	101.579	100.724	98.9268	98.7917	101.345	97.5186	100.65	98.8209
8.97	101.857	100.154	102.309	99.7539	101.004	100.026	98.5666	99.3025	100.498	99.1185	98.2877	98.8511	100.304	98.3931	99.6086	96.75	98.9073	101.11	101.905	98.3828	97.9458	101.426	98.0147	99.7054	98.9003	100.07	99.3974	100.128	98.9079	100.193	99.9087	100.057	96.347	97.3946	99.3965	99.7999	99.5036	100.073	100.151	98.3446	100.879	97.9278	101.01	99.1056
