# Supplementary material for: A mechano-osmotic feedback couples cell volume to the rate of cell deformation
Source: eLife journal article supplement (doi:10.7554/elife.72381), 2022-04-13
Supplement: supp [file A_exp_data.xlsx]

## Sheet: control 20180308
	3.15409	13.5096	21.1011	14.127	8.13682		20.0796	5.92747	21.4692		4.5837	10.7792	13.5172	25.2338	13.2743	3.22282	5.31697	13.9074	9.88838	28.0234	7.93576	29.2421		19.6326	3.25143	3.75747	18.6969	12.0628	5.23873	24.5247	6.5447	25.5018	17.3233	12.8238	43.9157	3.90023	6.94531	8.70688	7.80682	5.42212	15.0799	9.15602	16.5636			8.83455	5.66779	14.6309	12.2029
	4	4	4	4	4	4	4	4	4	4	5	5	5	5	5	5	5	5	5	5	5	5	6	6	6	6	6	6	6	6	6	6	6	6	7	7	7	7	7	7	7	7	7	7	8	8	8	8	8
	1	2	3	4	5	6	7	8 s1-0	9	12	1	2	4	5	7	6	8	9	10	11	12	13	1	2	3 s1-0	4	5	6	7	8	9	10	11	12	1	2 s14-0	5	6	7	11	12 s2-0	13	14	15	1	2	3	4	5
0	12.3767	29.2258	49.195	11.4407	33.074		59.3876	19.5532	38.6903		8.52851	13.4168	14.1449	20.2812	26.3136	73.012	5.82435	33.906	68.0201	60.3236	21.3213	76.1326		29.2258	23.5054	14.7689	14.8729	41.8105	12.2727	35.3621	14.5609	66.772	50.7551	12.2727	37.8583	23.9214	35.4661	39.8344	11.4407	6.96842	15.913	32.658	45.5547			13.3128	19.9692	19.9692	30.9939
1			65.5239						55.9554		27.3536					94.126		79.9808						59.9076			22.5694	63.5478		41.7065	27.5617			36.6102	73.9484		28.7057		19.3452			40.3544	56.8914			38.5863	23.9214	39.8344	63.1318
2				50.651				23.0894	54.1873			25.5855		81.3329	73.6364	88.925			96.8298	94.1257	47.9469	124.183		77.3807		22.7774	26.4176		18.6171	61.8837		112.951	101.302	55.0193	116.071			58.7635			49.507		62.1957				40.0424	49.923
3		64.8999	75.8206						62.2997								17.369			171.298				99.118			23.2974	67.7081	27.1456	87.0532	44.2027		112.327	50.131	185.235		48.2589		30.3698	6.96842		42.0185				58.0355			78.4207
4				74.7805	46.8028			36.5062	72.2843							94.75		129.072				221.013		75.8206			29.5378		36.7142	146.753			93.5016	48.1549				87.8853	31.6179		62.1957	59.2836	88.6133				45.0347	55.0193
5							169.53		78.2127		36.1942	61.9877	48.2589		137.704	91.109			137.392		63.2358			107.75		25.0655	46.0748	84.4531	38.8983		59.5956		98.8059	63.1318	309.523				56.9954		70.5162					76.5486			95.3737
6				97.0378	74.8845			55.1233	136.872					137.6						258.664		242.751		138.016	45.2427		71.8683		39.2104	165.786		218.517	153.201	73.2204		47.3228		98.3899					134.064				50.651	75.6125
7	40.4584	123.351	186.483				213.941		180.867				91.0055	226.214		92.67	42.6426	132.4			74.3645			162.042		42.5386	146.857	139.68	34.9461		64.0679	251.487	148.313		372.446		65.0039		67.292		117.631	80.8129				86.6372		99.326	107.022
8				136.248				54.6033				97.3499							144.985			327.932		159.13			173.69		51.3791			263.24		131.568				109.831		47.8429			155.489				68.8521	143.321
9			235.158		105.046		234.222	67.6041	235.886				106.294			105.566				296.938	100.262			211.445	52.2111				67.3961		75.8206		233.702		450.035		77.7967	117.839	78.5247		156.425	120.127				97.9739			161.418
10	42.0705			153.409				80.6048					164.226		161.314	122.519		194.804				358.926		253.255		52.3151								148.729	442.339		114.511	132.296					216.541					180.659
11		172.858							247.951		59.4916	166.93					43.0586		185.131		139.056			258.04				239.006			83.621		265.736			64.0679			98.9099		180.139	107.646				136.664			176.291
12			409.681	165.474	179.411		280.505	87.5733					143.425	280.401		114.927				319.507					81.3329	53.9792					109.103	304.114		155.177	466.468						231.518							183.779
13									268.128			242.231				129.8	61.1557	246.079				397.512								157.257			296.626		487.633	83.101			128.864	53.1472	233.286	113.575	278.529			145.713		202.604	186.587
14								84.4531	254.607		67.084		275.617		168.802					327.516				407.705				300.89					341.036	176.915	508.799			185.131			248.679	126.264
15	43.6826			281.857	266.568		286.953		284.353							144.985			209.365		141.24	443.483					245.871									140.512						155.697				170.258			260.64
16		195.636							275.617			296.834	321.795				76.6526	277.905		335.524				437.97	190.643	86.0132							362.046	181.491	540.208				255.231		310.979		266.672				103.694		303.282
17	51.6911								258.56		101.094			347.381																						144.673			292.362	94.0217		226.422				191.892		229.542	358.822
18				241.086	305.05		297.354		287.681							180.867			222.261			492.262									170.674			185.755			248.679					225.902
19			443.275					143.321			202.708	344.989	387.735		292.674		95.5817													161.002			354.037		598.868				394.808			242.855				224.237			416.129
20	90.9015												394.132	390.855	297.25			347.277		430.898		501.154		485.917								328.66				128.968		221.013				263.968
21					331.988		351.957		368.286			391.48				206.868			259.288								275.201	350.813					407.6						436.618		325.228	254.399					141.24
22													400.528			236.094	105.67				152.265	510.047									184.923											256.791	303.906			226.734
23								165.786																	219.557															107.854		272.08
24	131.36				395.952		313.579		347.797		208.845	430.066		431.522	355.493	180.763	129.488	377.231						445.251					69.2682	164.434					658.776		314.411		448.787		396.992						205.412	281.961	471.772
25		266.36	498.606													298.082			303.282	443.171	164.642											351.749				176.499										246.391
26													400.424			285.913										197.924				170.778				235.886				262.408
27					402.192			165.578									148.417							545.825																120.543	470.524	320.859
28				272.6																	205.724							384.927		181.075																258.664
29	292.778		433.602				380.247		365.27		231.622	430.17	437.97	442.235	384.303	295.378		356.013				497.358							84.2451	166.306					650.247		397.824		470.836									264.904	539.272
30																	191.372		350.293								289.241			178.579	248.887		424.137			196.676											265.424
31		303.178			442.235											308.691														186.899								309.523		165.89		334.484	344.053			315.243
32													470.42							510.255	257.103			590.027	272.184							357.677
33								190.227								287.473	226.318									201.772								267.088							457.315					284.769
34	351.021		502.038	230.998	427.258		399.904		365.166		258.56	348.733		477.389	408.225			418.729	369.95			543.017						349.461							626.118		469.38		539.48	162.978
35													486.853			284.873														207.284																			543.121
36															412.229						277.385			589.091							265.944					215.709										269.376		200.732
37																	291.113										288.201		121.791									360.486	575.363		489.765		325.644				301.41
38								227.254					521.903			271.768																	462.516									402.816				253.983
39	419.353	326.892	494.446		454.299		451.803		351.957		302.138	357.782		488.205	416.233			425.178	404.168	530.12	332.82	538.544		738.34	278.217	200.108		376.711						318.363	626.222		506.302		611.245	209.261									587.115
40																277.905																397.824
41	450.295	353.881											540.833				265.424																													302.45		187.003
42																297.666															295.586							407.392			385.759
43								259.288																700.586						284.249												456.379
44	481.237	380.871	475.413	241.399	500.582		507.134		340.1			383.575	629.966	437.97	434.226	194.388	331.26	423.409	386.383	499.646	346.029	535.944				221.013	265.528	314.099	110.247				443.587		645.359		569.018		648.999				318.883				349.669
45	490.493										308.223														302.658															226.526						284.353			506.926
46	479.989															172.962																393.456										503.702						200.316
47	435.37																																	345.613
48	402.92																																								379.727						368.078
49	459.604							229.542								139.576									336.356
50	440.674	446.083	438.178	235.782	480.093		482.693		330.74		314.307	358.302	688.625	430.586	442.859	131.048	275.617	392	341.557	502.038	351.125	540.728		761.222		170.778	282.897	276.137	184.299	280.609	312.747	423.305	480.301	365.894	562.05		581.707	418.729	640.262	275.305		485.917	293.714			268.128	386.487	206.972	489.245
[truncated: 41 more columns]

## Sheet: Y-27 20180220 60
	1	1	1	1	2	2	2	2	2	3	3	3	3	3	4	4	4	4	5	5	5	5	1	2	5
	1	3	4 shift 2-0	5	1	2	3	5 shift 2-0	6 shift 2-0	1	2 shift 4-0	3	4	6	1	2 shift 4-0	3	4	1 shift 2-0	2	4	9	2	4	8																				A (µm2)	stdev	t (min)
0	43.7866	30.6818	28.4977	22.9854	23.5054	67.7081		16.017	22.8814	14.4569	2.91218	59.6996	36.2982	15.913	22.8814	32.554	56.5794	60.9477	45.1387	45.2427	30.89	7.80047					32.7323	17.6845	21	0	3.85908							33.698	4.17149	17.6981					32.7323	17.6845	0
1	33.074	62.6118	45.1387	39.7304		70.3082		42.2265	76.9646	48.0509		86.9492	55.4353	35.9862	39.4184		80.8129	68.8521									56.1114	17.4509	14	1	4.66395							54.6466	5.24103	18.1554					56.1114	17.4509	1
2	61.1557	65.3159	98.4939	77.6927	57.5155	84.5571		26.6256	74.9885	99.95	18.9291	105.774	60.9477	56.8914	71.2443	68.4361		103.382		83.101							71.4706	23.6858	17	2	5.74465							64.2375	6.50957	28.3745					71.4706	23.6858	2
3	65.3159	83.517	107.23	109.103	63.4438	114.407		49.715	80.0848	142.385			81.3329	74.5725	144.361		130.112		72.9084		41.29						90.6518	31.2143	15	3	8.05949							83.9885	8.99382	34.8329					90.6518	31.2143	3
4	90.0694		191.58	119.503	64.4839	120.231		104.838	152.057	210.197	130.008	198.652	104.942	81.6449	233.702			224.445		120.647							143.133	53.0968	15	4	13.7095							107.178	15.7181	66.6865					143.133	53.0968	4
5	112.535	108.999	278.945	141.553	120.543	130.216		225.486	127.2	265.112			177.747	107.23	242.231	95.1657	173.794	210.301	66.772								161.489	63.0676	16	5	15.7669							130.684	14.5145	61.58					161.489	63.0676	5
6	126.16	159.338	310.875	139.68	87.2612	163.706		272.288	150.809	289.865	189.707	256.583	240.878	102.238	278.113			293.09		98.4939		32.866					187.762	83.2361	17	6	20.1877							152.806	18.0085	80.5363					187.762	83.2361	6
7	143.737	167.762	317.115	156.945	91.9415	144.153		333.652	137.808	312.227			306.09	109.831	293.402	120.647	286.849	307.963	75.6125								206.608	92.6263	16	7	23.1566							189.053	21.4784	88.5576					206.608	92.6263	7
8	189.083	243.583	372.758	157.569	97.4539	221.013		312.539		295.274	222.157		285.185		309.315	248.991		343.429		176.603							248.211	74.1813	14	8	19.8258							223.846	16.9947	70.0709					248.211	74.1813	8
9	196.572	266.36	413.217	272.184	98.1819	252.111		322.939	302.97	377.647		288.617	438.074	167.346	339.788		348.421	411.033	141.761								289.826	97.2881	16	9	24.322							258.432	25.3204	107.425					289.826	97.2881	9
10	208.117	266.568	415.713	318.675	163.29	406.56		336.044			244.935				400.008	261.68				363.502	243.479						302.381	79.7412	12	10	23.0193							288.473	21.9171	79.0232					302.381	79.7412	10
11	206.244	265.632	403.96	388.567	115.343	445.147						349.877		172.13	440.362		369.014	388.047	172.442								309.731	111.796	12	11	32.2726							288.446	26.4396	109.013					309.731	111.796	11
12	258.976	318.883	429.234	302.138	105.566	525.128		459.084					575.467	224.445	487.581			385.551									370.187	135.663	11	12	40.9039							331.253	31.7893	123.119					370.187	135.663	12
13	266.88	348.005	420.913	414.777	105.566	509.007								276.761	481.133				251.591			246.495					332.113	118.712	10	13	37.5402							314.175	36.8064	122.073					332.113	118.712	13
14	331.156	355.389	433.186	421.849	128.032	520.031				513.999		392.728	668.032		561.01		475.205										436.42	134.354	11	14	40.5094							393.67	34.1891	136.756					436.42	134.354	14
15	313.475	366.102	449.411	524.816	144.569	575.051			433.706		292.986					365.79		513.791	262.824	467.82							392.528	119.721	12	15	34.5605							378.621	38.6045	128.037					392.528	119.721	15
16	341.661	470.732	492.262	520.031	169.218	593.252						440.778		252.631					269.792								394.484	134.161	9	16	44.7204							391.468	42.587	127.761					394.484	134.161	16
17	364.958	541.561	452.635	527	188.875	689.145				599.96									276.761		292.05						436.994	157.358	9	17	52.4526							416.991	41.4804	143.692					436.994	157.358	17
18	368.494	509.319	520.759	556.745	180.763	798.04													324.083								465.458	182.978	7	18	69.1591							453.631	71.335	188.735					465.458	182.978	18
19	404.168	485.501	499.958	583.683		743.333				685.921		456.587	832.778		528.456		591.38	515.039									575.164	124.331	11	19	37.4872							471.299	40.999	173.944					575.164	124.331	19
20	466.572	520.447	591.068	740.837					347.381		339.892			254.607		453.779			367.662								453.583	140.331	9	20	46.7769							460.867	55.4504	146.708					453.583	140.331	20
21	384.615	460.956	595.54	722.635													637.662			554.769	318.259						524.92	133.184	7	21	50.3389							491.469	46.8447	132.497					524.92	133.184	21
22	413.633	576.507		720.451									891.75		563.922				402.816								594.846	170.751	6	22	69.7087							548.101	55.4775	166.432					594.846	170.751	22
23	496.734	549.257		706.826				501.31						331.78													517.181	120.031	5	23	53.6797							509.891	51.8127	126.915					517.181	120.031	23
24	579.835	616.757		787.015		707.451				651.599		510.255	1011.46	361.318	624.038		683.945	596.06	420.081			411.553					612.413	165.881	13	24	46.0071							558.85	42.5081	175.265					612.413	165.881	24
25	571.098	585.139		758.518	310.147				378.271		316.179					508.175											489.647	152.645	7	25	57.6945							518.129	50.1643	132.722							25
26	590.86	510.255		699.13																							600.081	77.3833	3	26	44.6773							536.901	44.2154	98.8686					600.081	77.3833	26
27	658.984	571.93	583.891	759.142																							643.487	74.6461	4	27	37.323							557.91	63.8309	142.73					643.487	74.6461	27
28	582.851	587.947		674.065					412.385					393.04							367.558						502.974	116.549	6	28	47.581							519.08	38.2605	101.228					502.974	116.549	28
29	767.462	535.84		712.963		787.431			439.426	711.091		557.161	1130.96		672.92		809.585	685.401				390.127					683.364	186.887	12	29	53.9497							621.21	51.1651	204.66					683.364	186.887	29
30	799.08	545.409		631.526							378.167					579.419											586.72	135.911	5	30	60.7812							485.016	88.001	215.558					586.72	135.911	30
31	789.407	550.817		615.717															529.392	597.308							616.528	91.8346	5	31	41.0697							575.865	47.0636	115.282					616.528	91.8346	31
32	894.142	585.555	614.261						440.05				1012.92														709.385	211.277	5	32	94.486							741.123	110.108	220.217					709.385	211.277	32
33	837.042	544.993															734.7										705.578	120.994	3	33	69.8559							619.004	64.3033	143.786					705.578	120.994	33
34	893.934			714.939		725.132				781.399		471.148	1034.34	345.717	712.755			622.581	569.954								687.19	188.731	10	34	59.6819							614.767	50.7445	196.533					687.19	188.731	34
35	894.766				402.192						480.093					590.027											591.77	187.23	4	35	93.6152							648.479	174.151	246.287					591.77	187.23	35
36	1013.44																										1013.44	0	1	36	0							674.897	141.496	245.078							36
37	906.31		599.804	706.826					483.109																		674.012	155.716	4	37	77.8581							681.969	112.075	194.119					674.012	155.716	37
38	848.067			711.299						810.417																	789.928	57.6843	3	38	33.3041							700.924	81.0253	162.051					789.928	57.6843	38
39	872.196	583.579		718.163		812.497						500.79	1168.51		729.396		1038.29	654.199									786.403	201.548	9	39	67.1826							656.695	62.2301	241.016					786.403	201.548	39
40	832.674			657.111							446.395					601.468											634.412	138.075	4	40	69.0375							647.681	89.5118	155.039					634.412	138.075	40
41	871.364																										871.364	0	1	41	0							871.364	0	0							41
42	735.74		644.111					543.121	450.659										570.266								588.779	96.0872	5	42	42.9715							735.74	0	0					588.779	96.0872	42
43	840.475													401.776	684.985					713.587							660.206	160.27	4	43	80.1351							609.494	64.66	158.384					660.206	160.27	43
44	996.796	580.875		728.252	403.544	772.558						516.599	1149.48				982.443	646.607									753.017	233.148	9	44	77.7159							645.194	51.0842	210.626					753.017	233.148	44
45	1028.62									760.702	471.148					652.015			567.354								695.968	191.764	5	45	85.7593							894.662	94.7241	133.96					695.968	191.764	45
46	911.199																										911.199	0	1	46	0							911.199	0	0							46
47	912.447		620.917	605.42					428.298																		641.77	173.632	4	47	86.8161							648.271	78.2173	156.435					641.77	173.632	47
48	944.377													374.318								488.205					602.3	246.313	3	48	142.209							602.3	142.209	246.313							48
49		578.899		710.051		762.886				727.212	407.496	474.477	1261.39		670.32	656.279	1024.77	698.09									724.716	228.153	11	49	68.7907							656.439	59.6908	231.181					724.716	228.153	49
50	1096.43	536.984		665.432																							766.283	239.269	3	50	138.142							679.135	128.181	256.363					766.283	239.269	50
51			640.991					437.866	497.462										652.431								557.187	92.0584	4	51	46.0292																51
52	959.458																1042.25										1000.85	41.3943	2	52	29.2702							814.196	153.649	266.127							52
53	990.348	592.42		651.807	404.376	770.166				712.027		479.469	1320.57	402.92	709.531		1063.57	643.695		817.593		470.316					716.343	255.083	14	53	68.1737							617.676	49.5807	242.895					716.343	255.083	53

## Sheet: EIPA 20180516
	1	1	1	1	1	1	2	2	2	2	2	2	2	2	3	3	3	3	3	4	4	4	4	4	4	6	6	6	6	6	6	6	6	6	7	7	7	7	7	7	7	7	7	7	7	7	7	7	7
	1 s8-0	3	4 s1-0	5 s1-0	7 s1-0	8	1 s1-0	4 s1-0	7	8 s1	10	11 s1	12 s1	13 s1	1	2 s1	4 s8	5	14 s1	1	2	3	4	5 s1	6 s5	1	2	4	6	9	10 s1	12	13	14	1	2	4	5 s3	6	7	8	9	10	11	12	13	14	15	16
0	46.491	75.613	39.834	31.618	32.138	3.536	25.482	73.012	54.291	73.428	9.985	40.978	8.841	7.488	32.866	14.977	18.513	7.696	9.049	38.898	50.859	71.348	22.881	42.643	14.769	59.7	47.323	39.834	9.361	30.994	39.418	78.213	59.908	79.253	19.033	35.154	53.147	33.074	68.852		78.525	63.86	43.683	79.565	75.301	82.685	16.017	51.795	51.275
1		120.855	63.86	53.147			48.467	107.542	97.246	93.398		63.34	40.978	21.321	66.148		24.962		35.674	79.149	69.268	97.038	45.867	65.42	48.883	77.381	60.948	56.371	21.321	53.563	48.363	104.838	56.683	126.992	191.059	91.942	71.764	39.314	95.166		116.591	86.221	63.86	100.158	94.022	105.462	56.371	75.821	69.06
2		124.079	88.197	128.864	62.3			161.106			37.962	216.749	51.795	66.772	78.109		39.522		68.956	97.87		105.15	77.693	69.06	65.004	83.517	74.364	79.253	48.883	63.964	59.076	114.095	61.78	135.936			81.125	55.227	83.621		120.751	106.918	77.901	112.119	101.926	109.311	71.348	71.972	82.477
3		209.261					76.133		100.678	114.719	53.355		56.683	78.837	109.207	44.931		35.986	85.805	107.022	85.701	116.071		116.071	71.66	102.238	82.789	74.78	55.643	72.908	62.82	126.68	65.42			114.407		69.06					88.093	113.887	108.999	115.239	82.997	85.909	104.318
4		257.936	97.766		86.429			266.464		110.143	66.46	235.574	52.835				43.059		110.351	126.992			89.965	252.111	72.908		84.661	98.494	71.764	68.228	74.676	131.568	70.828	282.065	193.556	267.4	244.935	69.58	170.362		141.449	285.497			121.791		91.317		104.11
5	68.54	278.009					62.82	310.667		127.512			60.22			97.87	51.067		128.448	132.296		115.655	110.039	273.328		158.298	93.918	91.109	87.365	75.301	73.948	125.432	74.052		199.172								95.27		137.808			97.35	118.463
6					85.597	23.609	63.86		212.069			265.528	64.588	85.493	215.189	110.559		123.039	118.463	135				284.561	88.405		111.079	130.32	92.15	89.861	81.645			310.043		315.763	286.745	78.837	195.844			319.299					97.974
7		291.322		298.602	120.647		68.54	354.869	263.24	136.664			71.66		228.294					138.224	282.377			294.65	83.101	190.747			134.688	101.718	71.764	141.969	79.461		198.964			106.606					100.99			249.719		97.142
8	48.051				123.871		86.325					282.585	75.301	93.294		135.208	56.163	178.995	134.168		273.848	308.899	118.463	302.034	89.965		118.879	249.303	127.096		82.997				205.412	318.051	325.54	92.67	216.229		281.753	400.84		264.696
9		334.484		304.738			186.275	374.11	291.842	137.392	79.149		78.213	94.646	239.006						288.617				95.79		137.392		174.626		82.373	146.857	105.046	317.843	202.084	315.867	316.803				301.514			257.415	293.298	272.704	107.646	108.271
10			208.013		124.703		193.452			151.017	81.957	280.609	78.837			250.967	62.404		280.817	172.65		449.515		321.483		239.526		293.506		214.461	89.861								216.333				181.699						245.247
11					159.962								88.717	108.583			73.428		299.538						103.902							151.329					349.149	107.438							322.315			121.479
12	79.357	348.941	234.326							141.761			93.19	108.167	274.577		86.013										284.457					153.097	229.646						220.181				204.684	291.842
13					157.777		200.108	424.97					101.614			297.666		334.276															216.853					116.175			303.178				348.629		218.829	238.902	263.24
14	91.421			355.701		24.545					223.821	295.482										518.159				272.808						172.65					367.974					492.054			360.486	285.185		247.015
15			255.335							165.474				106.19	269.48		86.325	347.797		171.506			168.594								114.511		247.743												380.455
16	74.572	352.477						443.587		200.108	248.991		121.999	103.278									179.723																238.07		326.684		256.479	357.053			224.758	255.647	284.977
17							214.981									323.043									199.588
18	87.157				154.345							296.73		115.967	318.675				324.291					343.117	186.483						109.519												281.545
19	105.046	389.711	258.248					485.085	439.218	243.063						333.652		404.376			423.305	586.803	199.484		216.541	326.06	390.023	424.866	136.04	258.768		344.781	291.738	388.775	211.029	447.851			247.639		339.476	595.332		352.061	421.745	313.059		262.824	310.979
20	112.015			377.751													89.757			291.842																	406.56
21	115.343					29.538	236.614				283.937		199.9	122.935	343.845																												295.794
22					162.666	28.914				320.235
23	275.721	384.303	288.617					510.983				314.619		123.039			98.286																										320.547
24										356.221	291.009		222.469												228.294					282.949		386.071						232.558
25	288.721					35.154											99.118			292.154
26	287.993				178.371			543.121		355.909		341.036					98.494						284.457															245.663					349.877
27		394.6	332.612	469.276									233.182	130.736
28							256.271		542.913						396.16	363.606			385.655					337.188							129.904
29					203.436						318.883							557.161			493.614	634.438				342.805	453.675	490.597	133.44	307.13		394.704	400.216	465.844	232.35	471.252		255.023	250.239		410.305	756.853		449.515	456.587	407.705	261.368	315.451	331.884
30						48.571		579.315																													404.584
31										391.896				157.881			101.822			324.291																							423.513
32		410.201									313.059																											269.064
33	306.298		352.165		247.743			637.558				401.048		171.818
34				545.409		52.107	273.64																		235.054
35																	104.318
36														213.837																	221.221
37	329.388																																					314.723
38					289.345	58.868			615.717				273.536		483.733	376.607			483.941					316.075														373.174
39			363.086					685.089		433.082	379.831	451.803		246.599				711.299		357.261	625.598	654.407	333.444			445.771	461.684	554.249	131.048	328.556		416.649	434.33	504.95	263.344	465.844	435.058		253.463		476.349	901.526	453.155	536.36	535.112	493.094	261.264	357.573	351.021
40		453.571
41						63.86								301.098																								352.997
42				569.538																											230.582
43					334.38		301.41
44	339.788					68.332											107.022								239.214
45			368.39
46																																						404.584
47		568.81
48					382.847	87.365		764.55				520.031	334.588			440.778			675.833					315.347
49									621.853	521.279	403.856				486.333			744.685		375.255	630.278	845.363	361.734			524.816	477.181	592.732	129.072	438.802		446.707	487.685	524.296	332.82	460.02	535.112		278.425		627.99	1064.3	568.082	596.684	649.207	565.378	287.161	397.408	377.959
50			347.901				331.676							336.772
51	362.566			636.622													237.03
52						90.277
53																	258.976
54		558.618
55	370.886																								256.791
56
57																																						472.396
58
59			416.337	649.311			362.774	805.736		553.417		520.343	360.278	348.317		442.443			748.533					340.62							253.047
60		646.607				125.016			646.607		412.385				497.982			759.558		378.687	639.95	751.757	419.145			543.641	537.088	623.829	125.744	471.564		504.638	499.126	528.456	382.743	438.594	567.978		304.946		726.38	1122.12	511.919	604.172	700.17	641.927	345.405	457.315	436.098
[truncated: 36 more columns]

## Sheet: Lat 20180517 1 and 0
	1	1	2	2	2	2	3	3	3	4	6	6	3	3	3	3	4	4	4	4	4	4	4	4	4	8	8	11	11	11
	1	6 s1	2	3 s1	4	5	2	5	7 s1	7 s4	1	5	5	6	7	9	1	2 s3	3 s1	7	8	9	10 s8	12 s1	13	5 s1	6	1	2	7																			A (µm2)
0	54.395	17.889	22.881	75.613	17.681	61.78	21.009	61.156	20.385	65.212	64.692	12.377	27.666	36.922	28.602	75.197	72.492	29.954	19.657	60.844	114.719	68.852	10.609	57.619	74.78	11.025	69.476	49.507	53.875	22.153		45.9673	25.8247	30	0	4.71492								51.0027	25.0973				45.9673
1			31.202				52.523	89.653	40.666	61.26			34.738	51.067		84.765		39.938	49.195	72.076	135.52			69.996	88.301	32.138	120.127	65.42	68.644	35.154		64.3359	28.5585	19	1	6.55177								59.5462	33.7926				64.3359
2	56.059		48.467		37.962			94.958		91.317	67.604		54.707	66.668	56.683	100.47	88.925			72.596	166.722	76.133	28.082	83.309	85.389	59.388	124.495		62.716	63.236		75.5184	29.7518	21	2	6.49238								70.2609	30.9368				75.5184
3	83.309	74.78	64.172			85.285	52.107		60.74	103.382			61.26		65.316	98.39				65.108	175.667	77.173	46.699	112.223	108.895		125.328	79.877	90.485			85.7998	29.7418	19	3	6.82324								83.2357	30.8856				85.7998
4			95.374		58.035				63.964		80.605			58.139	74.572	195.948	88.093	44.827		63.028	182.947		44.099			100.47	142.593	85.077	131.36			94.3207	44.8083	16	4	11.2021								98.0454	42.3148				94.3207
5	111.807			77.693	69.996		65.94	95.062	87.053			40.146	72.284	70.412		213.005	99.326	50.547		92.046	171.714	92.566	69.164		114.199	133.024	161.626	73.012				98.0311	42.0028	20	5	9.39211								98.2686	42.7886				98.0311
6			88.093				68.436	110.871			92.15	58.348	88.405	70.1	75.717		101.822		78.733					108.479				97.038	135.832	110.871		91.7782	20.112	14	6	5.37515								90.0939	23.3794				91.7782
7			87.469			93.398		118.047	89.653			82.477		75.821	66.356	214.253			72.18		178.787	78.317	65.732		93.814	126.472	174.626		148.209			110.351	44.1974	16	7	11.0493								109.545	44.5366				110.351
8	138.744	76.965		92.254	57.307			121.479	94.958	120.439		81.645	161.73	76.757	75.405					79.669	188.459		72.284	110.351				122.831	149.561	124.183		108.057	34.6564	18	8	8.1686								104.793	43.3615				108.057
9		79.357	120.647	82.685				265.632	98.286		93.814		315.347		78.109	218.205	115.759		68.644		201.148		77.589	120.023	112.847	144.361	166.93		169.01			140.466	68.1985	18	9	16.0745								148.798	70.0546				140.466
10	105.878	79.669	102.03		80.085		87.573		118.255	113.575	88.509		316.283				121.375			106.19		98.494	89.445	147.481				153.721		128.448		121.063	54.71	16	10	13.6775								111.668	57.0065				121.063
11	117.735	90.485	126.16	85.909				262.72		105.254	87.365	85.389			74.989	213.733	115.135	53.979	75.717		216.853	100.574		135.416	91.213	182.323	184.715		160.586			128.312	55.3366	20	11	12.3736								131.134	57.1803				128.312
12						115.343	115.343				87.469		316.491	82.373	66.148				94.542			112.119	94.75		97.766		195.636	156.737		142.281		129	63.4776	13	12	17.6055								123.45	60.467				129
13	125.12	93.19	121.791	92.254	81.749			287.889	143.321					78.525	85.077		88.197		103.07	90.797	318.467			134.896	153.305	166.722		158.818	178.163			138.964	65.8795	18	13	15.528								132.372	75.351				138.964
14		110.559	139.264									102.654	338.02	88.405	110.143	213.941				91.838	325.852	149.873	92.046		103.694		183.051			135.936		156.091	79.8728	14	14	21.3469								148.932	70.9123				156.091
15		103.382								110.247							111.183	69.788		84.661				140.928		174.626		146.233				117.631	32.1799	8	15	11.3773								103.937	24.8939				117.631
16	141.761			99.534	104.422				263.448				357.99	90.797	129.488	218.309		72.7			336.252	120.023	114.823	126.16	116.175		228.814	217.477		169.01		171.011	83.1545	17	16	20.1679								170.109	80.734				171.011
17		250.239	125.016								159.754				173.066		98.39			75.925		143.737			165.266							148.924	49.6399	8	17	17.5504								131.473	52.6135				148.924
18				104.734	97.974	115.135			266.984			138.744		87.053	172.338			80.189	113.887			111.287	141.449	141.24	156.841	183.675						136.538	46.839	14	18	12.5182								129.176	50.4076				136.538
19	128.552		133.752		95.062								410.929	81.645		221.117	107.854	67.604		85.805	367.454	137.496			158.089		385.551	238.174	248.575	166.306		189.623	108.936	16	19	27.234								185.101	98.1152				189.623
20		292.674		113.887	124.287						256.271			91.942	235.782				284.457			162.146	222.677	159.754	161.314							191.381	66.905	11	20	20.1726								150.835	62.129				191.381
21														95.062		220.805		86.221		100.366	376.607		236.406			184.923						185.77	96.8377	7	21	36.6012								190.135	102.182
22										127.304			418.209		261.472							138.224		233.39	268.232							241.139	96.705	6	22	39.4797								227.184	105.919				241.139
23				109.727	105.67									97.558				92.774	352.269	84.661			246.599			217.165						163.303	91.6657	8	23	32.4087								121.5	56.4711
24	182.843		135.728										451.387		260.432	223.717	112.431				383.991	151.225		284.977	302.346			266.256		166.722		243.505	98.4109	12	24	28.4088								228.737	102.698				243.505
25				104.11		87.157								94.126				72.18	358.926	104.942												136.907	99.9039	6	25	40.7856								132.795	76.3085
26										113.783					280.089	222.365		97.974			403.544		235.47									225.538	102.902	6	26	42.0094								233.97	109.174
27		382.951			227.566									110.143	285.705			131.048				163.082										216.749	94.9427	6	27	38.7602								171.735	77.3122				216.749
28				111.807			90.277		396.784			167.554		100.262	275.825				362.67	122.103				283.313		214.669						212.526	106.493	10	28	33.676								182.453	97.9721				212.526
29	216.333		174.002		276.969						271.248		480.717	105.046	304.322	217.997	128.76	239.422			376.919	143.217			335.004		442.963	255.751	265.528	176.499		259.453	102.109	17	29	24.765								256.868	103.755				259.453
30				115.863		116.695								121.583						141.449												123.897	10.3663	4	30	5.18315								123.378	10.7994
31										240.878					341.349			265.632				182.323	253.671									256.771	51.062	5	31	22.8356								225.111	74.7579				256.771
32														126.16			131.984			137.912												132.019	4.7978	3	32	2.77001								132.019	4.7978
33		450.555		116.487										135					371.198					348.317		242.855						277.402	123.271	6	33	50.3251								200.316	65.316				277.402
34	222.469		255.855										516.495	124.808	367.454	221.741	120.127	269.064		137.704	411.553							274.16				265.585	119.061	11	34	35.8983								276.078	119.902				265.585
35										257.936				132.504																		195.22	62.716	2	35	44.3469								186.691	54.187
36														136.664	375.151					157.465			271.248									235.132	95.705	4	36	47.8525								234.586	95.5034
37														141.344				268.752														205.048	63.704	2	37	45.0455								141.344	0
38		505.678		142.593		135.832			582.643					137.808					392.832			171.61		402.504		304.53						308.448	161.662	9	38	53.8874								148.417	16.42				308.448
39	224.341		267.504		336.044						323.771	212.589	593.772	252.319	399.8	238.59	117.215			155.489	441.611				364.438		482.485	294.754	300.682	184.091		305.264	119.652	17	39	29.02								319.255	124.842				305.264
40							132.504							253.983																		193.243	60.7395	2	40	42.9493								193.243	60.7395
41								297.146							366.206								281.025									314.792	36.9459	3	41	21.3307								331.676	34.53				314.792
42														272.704																		272.704	0	1	42	0								272.704	0
43																				169.946												169.946	0	1	43	0								169.946	0
44				168.906										285.497	397.304		128.344					197.3										235.47	95.9757	5	44	42.9216								255.939	90.345
45						192.412				327.828																						260.12	67.708	2	45	47.8768								180.659	11.753
46														287.161	432.354								294.754									338.09	66.727	3	46	38.5248								359.757	72.5965				338.09
47																		336.564														336.564	0	1	47	0
48		589.715		324.916				400.008	772.974										440.258					433.81		321.795						469.068	149.392	7	48	56.4649								400.008	0
49	229.854		365.166		385.239						378.583	319.299	685.921	299.954	471.252	241.19	151.433			113.055	439.426	217.477			422.993		698.61	318.779	336.772	184.403		347.745	155.639	18	49	36.6845								373.64	158.631				347.745
50																																		0	50	#DIV/0!
51														362.046	438.906								302.138									367.697	55.9781	3	51	32.319								400.476	38.43				367.697
52																						275.825										275.825	0	1	52	0								275.825	0
53																																		0	53	#DIV/0!
54														349.149	512.647		167.346			108.479												284.405	158.854	4	54	79.4272								286.475	142.144
55																																		0	55	#DIV/0!
56										461.58				362.046																		411.813	49.767	2	56	35.1906								362.046	0				411.813
57																		364.334														364.334	0	1	57	0
58																			401.672					454.611		369.534						408.606	35.0769	3	58	20.2516													408.606
59		704.642		366.31					853.371				743.229	370.886	495.278	248.471	185.755			251.071	391.48	312.123			489.765		862.94	338.02	355.909	367.35		458.538	209.233	16	59	52.3081								405.809	161.58				458.538
60	271.976		446.707		385.551	291.946	206.764	505.886			449.307	350.917																				363.632	95.6996	8	60	33.8349								441.246	174.812				363.632
[truncated: 2 more columns]

## Sheet: GdCl 20180605 1
	1	1	3	3	5	7	7	7	8	10	10	10	10	11	11	11	4	4	8	8	8	8	9	9	9	9	10	10	10	10	10	10	10	10
	5	6	1	8	10	4 s4	5	13	12	1	2	8	14	1	4	5	2	4	5	7	8	10	1	2	3	5	2	3	5	6	7	8	9	13
0	16.537	11.961		16.017	60.324	39.626	24.753	66.876	52.107		24.649	48.571	49.403	91.838	71.868		72.076	60.636	42.019	48.571	42.435	32.138	77.901	57.515		61.988	73.948	28.914	8.841	58.764	30.058	51.379	77.485	53.043		48.408	21.3186	0	30	3.89223						57.213	31.4083
1	28.29	14.977		70.204	96.934	65.628	50.339	96.622	69.788		138.328	71.764	115.031	131.984	121.063			89.549	52.939	66.564	69.164	76.757	122.935	65.628		71.868	100.366		45.035	108.167	66.46	84.765	93.086	71.452		80.5602	29.2511	1	28	5.52793						90.371	40.3189
2	75.197	38.482		111.495		104.422	81.645	166.41	121.583			130.736	242.543	150.913	150.185			232.766	72.804	74.26	99.534			76.861			139.992	83.933	43.059	138.848	92.15	107.854	127.096	87.157		114.58	49.2579	2	24	10.0547						128.997	69.4871
3	94.542				280.401	111.079	96.206		131.568		249.927				271.456					84.973	101.926		327.412	83.933		95.582	271.456	124.808	73.948	143.529		219.349		103.174		159.182	82.1931	3	18	19.3731						182.209	91.6664
4		45.035		241.399		265.112						300.89	266.88	190.331	296.626		317.427	265.424	83.933	96.518	145.817	259.912		214.981				139.992	96.102	173.794	216.749		132.92	110.559		193.02	80.6029	4	20	18.0234						195.016	91.9752
5					317.947		101.406	285.913			336.668	366.622								99.222	249.719	325.956		239.526		106.086	319.195					254.607				250.239	92.7504	5	12	26.7747						253.72	105.419
6	111.183	59.076		278.841		351.957			159.338			359.758	307.442		326.476		356.533	263.656	98.182	110.871			412.073	247.223							259.288		146.857	123.559		233.665	108.128	6	17	26.2248						234.047	110.996
7					332.196		115.447	315.243			413.321	391.792		348.005	361.526				105.358	107.334	317.427	367.766		272.392		110.767	390.959	162.146		346.965		271.352				278.235	108.847	7	17	26.3992						282.029	114.403
8		79.981				408.537			173.17									284.041		114.199									104.11				303.282	164.642		203.995	108.41	8	8	38.3286						186.067	81.6608
9	101.094			305.986	339.476		140.2	322.107			467.82	423.721	340.308	400.112	394.08		375.359		273.64		347.173	372.862	518.575	301.618		136.144	423.825			392	331.884	300.994				333.761	102.484	9	21	22.3639						348.038	102.054
10		96.83				496.838			210.301									303.802										202.708	91.213				345.301			249.57	133.84	10	7	50.5867						228.873	101.231
11	120.543			414.881	395.12		146.129	348.733									373.382			251.175						169.322	465.22		106.502	419.145	327.204	331.884		270.416		295.69	115.466	11	14	30.8596						317.817	125.545
12		92.254				553.209			241.086									324.812										307.13	144.361				365.166			289.717	140.987	12	7	53.2879						269.049	107.465
13	125.536																																	304.634		215.085	89.549	13	2	63.3207						215.085	89.549
14		94.022		456.379	495.59		150.705	377.127	295.794		577.443	445.563	406.768	493.51	474.477		433.082	373.694	343.741	280.297	384.927	442.131	630.59	324.291		303.594	503.182	322.835	192.932	447.643	454.091	354.245	374.527			386.414	118.522	14	27	22.8095						405.332	119.019
15	136.04					630.382																												346.757		371.06	202.545	15	3	116.939						241.399	105.358
16		112.119		541.977	567.874			412.697	318.883								460.02	374.006								354.141	515.663	331.78		500.27		382.743				406.014	119.822	16	12	34.5895						435.648	125.114
17							210.405																											345.197		277.801	67.396	17	2	47.6562						277.801	67.396
18																																						18	0	#DIV/0!
19	171.402	133.856		530.224	615.197			477.493	340.724		620.501	498.19	467.092	590.547	551.753		474.581	395.848	460.228	320.755	483.421	489.869	679.993	359.758		383.679	543.017	352.373	227.774	583.683	537.192	410.825	531.784	369.014		450.028	131.216	19	28	24.7975						468.353	131.819
20							293.922																													293.922	0	20	1	0						293.922	0
21	265.84	125.848																																		195.844	69.996	21	2	49.4946						195.844	69.996
22							317.219																													317.219	0	22	1	0						317.219	0
23																																						23	0	#DIV/0!
24	294.13	164.954		651.911			341.557										506.094	438.282								401.88			375.775				622.581			421.907	146.008	24	9	48.6693						469.862	176.885
25						698.402																														698.402	0	25	1	0
26		191.476																																		191.476	0	26	1	0						191.476	0
27	305.57																																			305.57	0	27	1	0						305.57	0
28		273.328																																		273.328	0	28	1	0						273.328	0
29	312.539			719.307	835.898		370.678	507.134	374.943		593.876	630.174	558.41	674.585	585.139		543.329	442.651	649.103	435.474	433.498	658.464	791.176	308.483		414.361	643.071	463.66	417.065	698.922	601.26	374.631	675.729	426.426		540.714	142.598	29	28	26.9485						561.508	149.68
30																																						30	0	#DIV/0!
31		302.346																																		302.346	0	31	1	0						302.346	0
32																																						32	0	#DIV/0!
33																																						33	0	#DIV/0!
34	324.5	324.187																																		324.344	0.1565	34	2	0.110662						324.344	0.1565
35						745.829																														745.829	0	35	1	0
36																																						36	0	#DIV/0!
37																																						37	0	#DIV/0!
38																																						38	0	#DIV/0!
39	367.454	329.908		787.015	922.639		453.571	532.72	426.738		540.832	591.38	626.43	651.183	628.822		568.186	488.829	746.869	457.211	375.255	840.579	855.555	256.791		546.865	685.401	520.239	510.151	818.321	641.199	320.859	752.901	388.671		573.537	173.82	39	29	32.2776						593.331	170.491
40																																						40	0	#DIV/0!
41																																						41	0	#DIV/0!
42																																						42	0	#DIV/0!
43																																						43	0	#DIV/0!
44	399.072																																			399.072	0	44	1	0						399.072	0
45						778.799																														778.799	0	45	1	0
46																																						46	0	#DIV/0!
47																																						47	0	#DIV/0!
48																																						48	0	#DIV/0!
49	436.306	401.672		850.875	938.968		463.14	489.245	466.468		507.863	598.036	674.585	640.574	628.614		577.547	520.031	736.364	423.721	312.435	843.699	826.954	261.576		600.844	597.932	536.464	584.099	885.717	553.417	305.778	760.806	404.688		580.29	176.304	49	29	32.7389						601.63	173.706
50																																						50	0	#DIV/0!
51																																						51	0	#DIV/0!
52																																						52	0	#DIV/0!
53																																						53	0	#DIV/0!
54																																						54	0	#DIV/0!
55																																						55	0	#DIV/0!
56						847.339																														847.339	0	56	1	0
57																																						57	0	#DIV/0!
58																																						58	0	#DIV/0!
59																																						59	0	#DIV/0!
60	500.686	434.85		938.76	984.627		432.458	530.536	568.81		543.849	638.286	674.793	595.852	665.12		603.756	603.444	804.28	411.969	327.1	866.476	851.291	253.463		593.356	619.669	555.081	676.457	843.283	553.001	323.251	814.681	404.792		607.379	184.101	60	29	34.1866						626.873	180.794

## Sheet: EIPA+Y27 20180808
	1	2	2	3	4	4	4	6	6	6	6	6	7	7	9	9	9	11	1	1	1	1	4	6	6	6	7	7	7	7	8	9	10
	1	1	2	1	1 s3	2	3 s1	1	5 s1	6 s1	7	8	5	7	1	7	8 s1	1	2 s5	4s1	5	6 s2	1	1	3	4 s8	1	4	5	10	1 s3	1	1 s1
0	13.833	36.922	13.313	38.586	65.836	20.905	46.387	26.21	13.313	18.617	24.441	30.162	24.545	11.025	73.532	14.249	12.481	30.266	9.361	34.218	11.129	23.609	19.865	18.513	33.594	11.025	66.148	41.915	82.165	68.748	45.555	24.649	47.115		31.8858	19.9666	33	0	3.47574						33.9852	20.6242
1	35.154	80.709	34.114	54.291		71.972	51.587	60.844	30.266	58.66	56.059	57.827	62.092	48.467	110.455	39.834	35.986	76.445	25.378	86.429	60.116	55.331	71.764	40.042	55.851		92.878	222.261	121.999	113.367	61.78	57.827	102.03		68.7682	37.145	31	1	6.67143						62.8235	41.8937
2	65.836	105.774	78.317	89.133	94.022	94.126	78.213	69.58		101.302	127.2	73.74	101.51		131.88	66.356	68.332	112.327	37.546	265.84	66.668	72.7	99.95	63.34	79.045	71.764			229.854	127.096	86.637	88.613	110.143		98.5119	46.1552	29	2	8.5708						84.0334	39.9194
3	84.141		104.11	101.926		215.397	115.551		58.348		136.352			194.18		79.045	95.27	210.405	48.675	314.307	85.077	107.854	111.807	142.801		75.717	222.157	255.127			199.172	239.006	107.022		143.628	70.4735	23	3	14.6947						133.054	68.5936
4	112.535	145.089		111.911	217.997	270.728	150.081	76.133	102.654	241.19		206.452		239.006	161.002		118.983	245.975	93.398	314.931	94.854	228.606	149.873	263.656	210.093	103.694			274.889	278.529		312.123			188.975	74.3552	25	4	14.871						172.081	82.2388
5		170.466	116.487	223.405	258.664	290.697		104.942		243.895	258.872		123.975	226.11	278.217		121.895		235.99				133.44	299.538		175.459	273.224	297.146			291.842				217.067	67.7091	19	5	15.5335						188.53	84.8229
6				291.842	261.576		153.513	107.958	117.007			259.288	151.641		322.211		292.154	296.418		381.599	223.925	279.257		345.717	271.04	227.774	302.554		295.17	360.694		317.947	136.872		256.96	78.7914	21	6	17.1937						244.016	87.6547
7	285.705	261.784	135.936			305.154		137.808	139.992	294.65	294.234		274.889			128.552					257.207	301.098	147.689	373.59		300.682	306.818	334.38	394.912		321.171				262.961	81.3277	19	7	18.6578						239.418	97.435
8	318.675			326.58			236.718			305.154			335.524	271.248	329.7	129.384	347.277			372.966		320.027		408.849						528.352		349.045	130.32		313.988	95.7015	15	8	24.71						268.455	136.072
9		341.453	250.967	336.876		341.869		250.135	326.684		312.331	271.144			340.204			286.225	283.729		271.248		152.889	389.191	341.453		380.247	475.101	414.257	692.37		397.408	282.169		339.902	103.765	21	9	22.6434						317.368	109.483
10	352.581		312.435			350.293	279.465						375.567			297.042			335.316	416.649							434.226								350.397	48.9916	9	10	16.3305						305.343	88.6723
11		440.674			255.647																					356.325						384.719			359.341	67.1205	4	11	33.5602						319.445	133.722
12	379.831																		360.902			418.625									628.51				446.967	106.859	4	12	53.4296						241.763	138.068
13							324.604		355.285	305.986				327.62			420.289			463.14													301.306		356.89	57.1851	7	13	21.614						175.459	0
14	462.828	514.207	315.763	557.786		473.956		299.746			320.131	282.273	361.526		509.423	324.083		336.876	348.421		382.015		148.937	516.391	480.301		629.758	640.783	561.842	820.609		478.221			443.903	146.402	22	14	31.213						416.06	140.912
15																																					0	15	#DIV/0!						317.999	17.317
16					299.434																					436.41									367.922	68.488	2	16	48.4283
17																						665.536									790.447				727.991	62.4555	2	17	44.1627						360.902	0
18							347.901		380.143	348.005				383.783			477.493			608.229													336.564				7	18	0
19	528.976	589.091	398.032	772.558		499.646		339.164			348.941	308.379	398.864		584.515	312.539		497.774			525.96			523.567	599.076		737.3	728.98	622.373	993.78		622.269			546.589	170.515	20	19	38.1283						508.565	170.589
20																																					0	20	#DIV/0!
21					460.748																					483.213									471.981	11.2325	2	21	7.94258
22																																					0	22	#DIV/0!
23									378.271					484.669									351.021												404.654	57.6627	3	23	33.2916						351.021	0
24	608.229	693.722	399.592	856.491		661.792		359.758											476.349																579.419	164.17	7	24	62.0503						533.968	155.355
25																																					0	25	#DIV/0!
26					495.278																														495.278	0	1	26	0
27																						814.681									988.579				901.63	86.949	2	27	61.4822
28							416.545		434.538	465.636				586.803			665.848			753.213													505.574		546.88	117.251	7	28	44.3169
29	825.29	835.274	459.604	914.111		590.651		371.926			425.802	412.073	478.533		802.928	362.878		582.643			636.83		366.518	666.368	739.068		920.455	934.08	778.383	1032.78		994.716			672.901	219.518	21	29	47.9027						642.945	207.12
30																																					0	30	#DIV/0!
31					570.682																					612.077									591.38	20.6975	2	31	14.6353
32																																					0	32	#DIV/0!
33																																					0	33	#DIV/0!
34	780.151	853.891	658.776	1024.15		603.34													532.928																742.206	165.049	6	34	67.381						748.498	157.498
35																																					0	35	#DIV/0!
36					618.525																														618.525	0	1	36	0
37																						959.25									1128.88				1044.07	84.817	2	37	59.9747
38							514.207		471.044					679.473			769.334			790.135													701.314		654.251	120.925	6	38	49.3673
39	943.129	931.48	676.353	1084.27		750.717		532.512			433.706		590.443		936.888	512.231		702.25			653.887		397.408	712.131	788.991		861.692	986.499	1010.21	1197.32					773.796	219.557	19	39	50.3699						749.31	211.357
40																																					0	40	#DIV/0!
41																										642.447									642.447	0	1	41	0
42																																					0	42	#DIV/0!
43																																					0	43	#DIV/0!
44	925.24	964.866	745.309	1017.28															555.185																841.577	169.918	5	44	75.9897						913.175	102.269
45																																					0	45	#DIV/0!
46					706.722																														706.722	0	1	46	0
47																						967.362									1023.63				995.496	28.134	2	47	19.8937
48							569.33		592.108					666.264			813.121			779.111													846.611		711.091	107.754	6	48	43.9902
49	960.498	1032.47	747.493	1127.84		780.359		680.409			449.723		703.29		1125.66	820.089		739.9			750.197		437.554	842.347	766.734		1023	914.631	1145.01	1109.75					850.366	206.886	19	49	47.463						810.628	195.501
50																																					0	50	#DIV/0!
51																																					0	51	#DIV/0!
52																										598.452									598.452	0	1	52	0
53																																					0	53	#DIV/0!
54	1009.8	1045.78	863.356	1028.73																															986.915	72.4638	4	54	36.2319						986.915	72.4638
55																			616.029																616.029	0	1	55	0
56																																					0	56	#DIV/0!
57					772.038																														772.038	0	1	57	0
58																						1012.92									1118.38				1065.65	52.731	2	58	37.2864
59							719.515		624.974	828.618				695.178			867.516			815.097													937.096		783.999	100.504	7	59	37.9871
60	1113.28	1045.58	901.526	1078.44		850.979		651.599			504.95		840.787		1176.93	996.9		859.404			947.601		588.467	963.618	780.983		1168.2	972.25	1139.91	1253.17		1163.31			949.894	200.804	20	60	44.9011						893.865	199.085
[truncated: 3 more columns]

## Sheet: CK-666 20181030 
	3	3	3	5	5	5	5	5	7	7	7	7	8	8	9	9	9	10	10	11	11	11	3	4	4	6	6	7	7	8	8	8	10.1	10.1	10.3	11	11
	2 s7	3 s3	9	3 s3	4	7 s3	8	13 s7	1	3 s2	5	17 s3	2 s1	4	1	2	11	6 s1	9 s1	5	7	9 s2	13 s1	2	4 s1	4	9 s1	5 s1	6 s2	4	6	7 s2	1	2	3	7	9
0	7.592	28.186	5.408	4.472	45.971	37.13	10.401	14.353	5.2	7.592	80.293	28.082	18.513	25.69	22.985	28.706	56.579	20.593	33.802	42.331	48.051	35.258	37.026	38.378	13.833	54.603	14.041	17.785	32.034	41.082	17.889	12.273	72.596	50.547	22.881	26.938	23.193		29.251	18.1313	37	0	4.25808						35.9861
1		51.171		7.592	84.765	64.796	32.45				108.895		42.019	68.02	48.571		81.853		56.059	69.476	71.764	82.373	57.827	57.307	22.049	94.854	36.402	38.482	40.354	58.452	46.283	24.025	97.454	101.926	33.802	44.307	31.826		57.0743	25.2894	29	1	5.02886						53.6499
2	16.017		37.234				49.611				130.216	58.868	68.644		67.604	68.02	108.062	34.738	78.629	89.653	117.839		66.148		35.05		46.595	41.707		79.253	69.06	31.41	109.103	94.126	71.036	66.356	49.611		67.3836	28.3807	25	2	5.32736						61.8712
3	14.145	52.211	46.699	15.185	82.269	84.869	59.284	23.713	12.377	22.569	131.88		81.333		78.525	80.813	91.63	38.066		97.558		79.149	73.74	64.588	53.979	132.92	49.819	68.436	47.011	74.468	81.957	34.322		139.472		71.868	54.603		65.789	32.5334	31	3	5.7038						63.9015
4		88.613	49.091	18.721	107.022	104.63	58.972		25.69	24.962	152.993			82.997			117.839		72.804		154.449	107.23						87.469		90.381	91.63		209.677	210.717	68.228	85.285	53.563		93.771	50.6962	22	4	7.12013						83.155
5					103.59			28.394				59.18	83.309	211.029	102.03	103.59		42.123		112.327		195.324	58.348	78.421	77.173		56.163	89.133	47.531	118.047		31.41	215.189		96.83	104.63	62.508		94.3763	51.5983	22	5	7.1832						95.0213
6	18.513	98.91	53.459	56.683		92.358	66.044		35.674	31.618	131.672			274.16	100.47		133.752		83.205	136.56	171.506	291.426		70.62		254.711	53.147				111.391	47.427	334.068	240.358	83.205				123.789	88.4201	24	6	9.4032						111.091
7			77.069	73.428	271.872			28.498		41.29		56.371	96.518	311.603	97.974	140.408		48.467		108.167		311.707	76.029	64.692	84.869	271.56	56.059	102.862	46.075	139.056		57.099			111.391	135.832	55.435		114.573	83.1836	25	7	9.12051						110.436
8	21.009	130.112				97.87	70.932		34.01		156.009				90.381		141.969	58.035	100.158				69.996	65.004			63.028				140.512		361.422				79.357		104.988	76.0777	16	8	8.72226						107.055
9			81.645		314.619			40.146		42.851				366.414	77.485	177.019	161.21				334.172	371.51	71.244	67.188	101.198	284.145	72.908	107.646	39.522	142.281		47.219	352.685	289.761	139.68	198.236	66.564		164.473	115.513	24	9	10.7477						150.536
10	17.889	193.14		87.261		82.581	64.068		39.314				86.949			205.828		55.331	101.926	124.808																			96.2814	56.1565	11	10	7.49377						79.5559
11			77.485		299.226						160.17	72.492		380.663		280.505				254.815	368.39	445.147	57.515	75.717	111.079	287.577		181.283	42.019	177.123	180.763		401.984	316.387	151.121	253.047			217.834	120.252	21	11	10.966						193.261
12	17.161	180.971				78.005	56.475	54.707	35.57	44.307			89.549					86.533	115.863					65.42			96.102			186.795		58.764							83.3016	47.9467	14	12	6.92436						90.3164
13			90.797	84.037	341.036							71.764				335.212							59.596	55.747	137.08			198.756	59.284										143.331	105.906	10	13	10.2911						148.536
14		323.771				88.925	62.924	55.123	39.73	51.275	153.825	71.66	109.311	385.759	82.997	403.232	174.314		121.687	262.408	387.943	478.741		57.099		300.162	113.159	249.615		263.344	210.925		409.161	343.117	175.771	273.328			209.234	131.622	27	14	11.4727						191.064
15			97.974															95.478											51.379		252.319	66.98							112.826	71.913	5	15	8.48016						128.333
16		389.711		110.455	397.928	70.308					138.224	67.084	136.664	493.094		443.171			141.449			556.641					103.486			291.218									256.879	170.234	13	16	13.0474						235.007
17			99.95					46.075		60.74																			38.17		289.345	64.276							99.7593	86.9862	6	17	9.32664						126.5
18						63.444							114.823					112.431	120.855			586.179	66.46		142.801		105.982	272.808											176.198	156.033	9	18	12.4913						556.641
19			132.192	87.053	453.883		84.245		38.482		148.313			481.549	85.077	479.261	196.364			297.146	394.808			68.436		369.95				288.305	294.962		465.324	354.037	204.06	294.234	66.876		251.646	149.535	21	19	12.2284						194.619
20													118.047					110.455																					114.251	3.796	2	20	1.94833						586.179
21			154.969			75.197						67.916																							264.696				140.695	79.3202	4	21	8.90619						127.789
22	27.146			104.318				47.843										111.599				667.2							84.141										173.708	222.692	6	22	14.9229						87.053
23			181.595										149.873												132.192														154.553	20.4384	3	23	4.52089						146.597
24				112.639										543.641	79.669	482.901					433.706			78.941										367.766	300.058				299.915	175.997	8	24	13.2664						250.663
25			169.946																198.548																				184.247	14.301	2	25	3.78167						137.132
26		541.977		117.215		132.088						71.868	120.959																										196.821	173.798	5	26	13.1832						198.548
27			193.348							60.532								141.969				729.084										71.556							239.298	249.627	5	27	15.7996						142.315
28													136.976						245.663				82.373		126.368		112.431	355.909	72.388										161.73	95.1115	7	28	9.75251						141.969
29			202.604	115.759	514.727		92.15		39.73		194.7			563.714	79.253	494.446	190.539			291.322	474.997			92.15		444.627				408.121	372.654		633.19	406.768	332.924	399.8	70.516		305.461	179.539	21	29	13.3992						261.656
30				115.239														152.993	273.328																				180.52	67.4109	3	30	8.21041						72.388
31			238.798																																				238.798	0	1	31	#DIV/0!						221.706
32	34.738			149.353				60.636																															81.5757	49.0782	3	32	7.00558						115.759
33													142.593				130.944																						136.768	5.8245	2	33	2.4134						123.091
34																	181.075	214.773																					197.924	16.849	2	34	4.10475						161.834
35																																									0	35	#DIV/0!						182.063
36		573.178	257.519	149.665		185.651						62.82						204.164																					238.833	160.778	6	36	12.6798						257.519
37										65.42							151.329					808.857							66.98			82.477							235.013	288.64	5	37	16.9894						177.746
38													156.633					251.591	284.873						200.628		179.619	317.115											231.743	57.4916	6	38	7.58232
39					527.416		100.574		45.971		242.439		146.857	557.89	75.717	637.87				351.229	567.874		98.598	109.623		510.983				479.365	410.305		628.614	366.726	349.045	472.916	87.261		338.364	201.787	20	39	14.2052						294.197
40													212.901																										212.901	0	1	40	#DIV/0!						122.727
41													215.397				217.269																						216.333	0.936	2	41	0.967471						215.085
42	33.074							59.076																															46.075	13.001	2	42	3.60569						215.397
43																	227.358																						227.358	0	1	43	#DIV/0!						227.358
44													240.982				286.433							166.098															231.171	49.614	3	44	7.04372						226.266
45																																									0	45	#DIV/0!						240.982
46		676.769	253.983	153.721		167.658						61.156																											262.657	215.897	5	46	14.6934						253.983
47										70.412												864.708							77.277			85.181							274.394	340.858	4	47	18.4623
48													275.825					248.159	314.411				96.83		302.034		242.231	346.757											260.892	75.1945	7	48	8.67147
49					541.769		93.606		41.29		257.207			595.228	84.037	772.558	387.735			416.649	581.187			221.637		563.402				543.849	413.737		628.302	388.567	373.07	510.671	74.156		394.14	208.148	19	49	14.4273						321.22
50																																									0	50	#DIV/0!
51													288.305																										288.305	0	1	51	#DIV/0!
52																																									0	52	#DIV/0!						288.305
53	48.779							61.572					278.425																										129.592	105.37	3	53	10.265
54																																									0	54	#DIV/0!						278.425
55																																									0	55	#DIV/0!
56																																									0	56	#DIV/0!
57		707.034	288.617	213.421		275.097						58.348																											308.503	215.386	5	57	14.676						288.617
58										75.821												878.229							102.134			75.925							283.027	343.807	4	58	18.542
59													284.353					251.071	398.344				156.633		435.058		282.585	340.1											306.878	86.7553	7	59	9.31425
60					523.463		105.254		49.923		327.828			616.133	92.462	801.056	432.978			430.378	598.14			242.647		559.658				568.706	430.482		666.68	452.843	400.944	411.553	79.357		410.026	208.74	19	60	14.4479						345.416
[truncated: 4 more columns]

## Sheet: CK-666+Y-27 20190328
	1	1	1	2	2	2	3	3	3	3	4	4	4	5	5	5	6	6	7	7	7	7	8	8	8	9	9	9	9	9	10	11	11	11	12
	1 s2	4	5	1	2	4	1 s1	2	4	5	1	2	3	1	2	7	1	4 s1	1	2	3	4	1	2	3	5 s2	6 s1	7	8	11	5	1	8	13	5
0	65.732	38.378	65.94	63.652	46.595		53.251	49.611		83.517			58.556		29.33			10.089					60.532	63.756	39.522	39.938	11.857	48.987	66.668	82.061	51.483	57.827	73.22	56.891	78.941		54.0139	18.7482	24	0	3.82697								76.819
1	106.918	67.812	74.468	85.285	63.652		72.804	72.284		121.375			68.124		55.123			50.859					86.221	121.999	49.195	79.669	15.081	63.444	95.062	96.31	95.894	78.317	93.086	75.093	98.078		78.5897	23.3579	24	1	4.76791								99.2252
2		100.782	86.845		129.384		102.342	139.16		181.491			120.439		86.637			84.245						179.723	57.099			101.51	109.311	128.032	118.463	89.861	96.622	97.662			111.645	30.869	18	2	7.27589								115.154
3	216.125	195.844	95.998	109.935			190.123	169.738							81.229			111.703					101.718	281.129	55.643	95.894		135.208	115.967	123.559	164.954	119.087	105.462	112.015	196.364		138.885	53.3425	20	3	11.9277								145
4		268.96	110.767		154.553					373.798			128.448		120.127									322.523	67.5		68.852	213.005				101.926					175.496	99.7448	11	4	30.0742								196.602
5	261.472		128.032	127.512			223.197	194.7		429.962								147.793					118.255			92.358	138.744	298.914	120.751	142.801	209.781	118.775	116.175	190.019	208.221		181.526	81.4753	18	5	19.2039								200.368
6		318.467	233.078	142.385	266.464		249.303	193.244					138.016		178.475									353.933	68.124	121.999											205.772	83.3676	11	6	25.1363								240.036
7										433.498					231.83			286.225					163.186			147.065	166.93	362.358	130.84	150.081	239.838	132.296	143.113	246.183	248.471		220.137	88.6679	14	7	23.6975								230.925
8	277.385		296.21		294.962		264.384	238.382		465.844																											306.195	74.0388	6	8	30.2262								282.845
9		361.942		152.889						496.838			157.777		281.337			354.245					193.14	428.298	85.493	156.945	191.059	387.423	155.177	170.674	236.614	140.512	243.791	300.162	229.542		248.624	109.241	19	9	25.0615								272.649
10			365.062		354.557		327.204	259.808																	86.117	171.194											260.657	102.156	6	10	41.7049								269.748
11	304.738	395.952								565.69																261.264			172.754			163.082					310.58	138.797	6	11	56.6636								329.107
12			444.315	190.851									180.971													274.472											272.652	105.556	4	12	52.778								284.124
13	364.854				409.889		316.699	282.377										529.808							115.447		201.876										317.279	126.084	7	13	47.6555								274.743
14		463.14	447.435	252.631									346.757		379.727									626.638				469.588	164.434	207.076	292.466						364.989	133.949	10	14	42.3585								403.341
15	411.657							280.921		551.025															118.567												340.543	159.834	4	15	79.9171								328.842
16													405.936												220.805							174.522					267.088	99.9822	3	16	57.7248								267.088
17	441.507																													262.72							352.114	89.3935	2	17	63.2108								337.188
18							342.077											591.796									182.843										372.239	168.311	3	18	97.1745								571.722
19		537.088	601.364	394.912	578.691			367.662		680.097			402.088		448.059									792.528	236.302			578.067	251.695		316.595	233.702		429.858	338.124		449.177	159.751	16	19	39.9377								448.071
20																																							0	20	#DIV/0!								384.927
21																																							0	21	#DIV/0!								433.394
22																																							0	22	#DIV/0!
23																							346.133														346.133	0	1	23	0								346.133
24								454.715																													454.715	0	1	24	0								454.715
25																																							0	25	#DIV/0!
26																																							0	26	#DIV/0!								597.412
27																										345.093											345.093	0	1	27	0
28																		672.608																			672.608	0	1	28	0
29		600.116	687.065	438.178	592.316					958.314			445.251		644.839													651.495		373.798	337.188						572.856	174.268	10	29	55.1084								631.581
30																																							0	30	#DIV/0!
31																																							0	31	#DIV/0!
32																																							0	32	#DIV/0!
33																											247.951										247.951	0	1	33	0								374.631
34																																							0	34	#DIV/0!								247.951
35																																							0	35	#DIV/0!
36																																							0	36	#DIV/0!								527.416
37	649.415																																				649.415	0	1	37	0
38																		772.142																			772.142	0	1	38	0
39		648.479	704.954	515.975	690.706								533.864											921.599	294.65			791.488	449.827			304.01					585.555	193.503	10	39	61.1911								646.858
40																																							0	40	#DIV/0!
41																																							0	41	#DIV/0!
42																																							0	42	#DIV/0!
43																																							0	43	#DIV/0!
44																																							0	44	#DIV/0!								579.523
45																																							0	45	#DIV/0!
46																																							0	46	#DIV/0!
47																																							0	47	#DIV/0!
48																		885.093																			885.093	0	1	48	0
49				572.762	678.329																																625.545	52.7835	2	49	37.3236								891.274
50																																							0	50	#DIV/0!
51																																							0	51	#DIV/0!
52																																							0	52	#DIV/0!
53																																							0	53	#DIV/0!
54																																							0	54	#DIV/0!
55																																							0	55	#DIV/0!
56																																							0	56	#DIV/0!
57																																							0	57	#DIV/0!
58	689.457																									839.954											764.706	75.2485	2	58	53.2087								542.809
59							608.437											838.498									393.456										613.464	181.722	3	59	104.917
60		826.33	761.638	642.655	691.226			670.424							677.289								558.618	1116.71	324.5			880.413	714.419	656.279	549.465	422.993	439.114	655.447	333.028		642.385	194.256	17	60	47.114								708.665
[truncated: 4 more columns]
