# Supplementary material for: A mechano-osmotic feedback couples cell volume to the rate of cell deformation
Source: eLife journal article supplement (doi:10.7554/elife.72381), 2022-04-13
Supplement: supp [file adaptation_control.xlsx]

## Sheet: average adaptation values
CONTROL	shock (5)	stdev	10min after shock (15)	stdev	30 min after shock (35)	stdev
20181126 10	109.413	3.56555	102.439	6.51371	104.04	9.33981	9.41282	4.04
20181126 30	131.531	7.43592	118.788	15.8948	118.319	15.4748	31.5313	18.3186
20181126 40	139.465	7.63243	121.971	17.5727	122.649	16.3555	39.465	22.649
20181126 50	162.909	11.6849	119.796	15.8343	128.079	15.7225	62.9095	28.0792
20181206 10	109.445	3.95434	105.395	6.62182	105.331	8.40235	9.4454	5.33052
20181206 30	121.451	6.24203	108.803	10.3129	105.022	10.536	21.4511	5.02177
20181206 50	162.831	11.0178	126.037	20.1944	133.178	20.6254	62.831	33.1783
20190328 20	115.06	4.11022	102.544	6.72784	103.866	9.55701	15.0596	3.8661
20190328 40	131.999	7.40226	106.214	13.0141	106.664	13.4204	31.9991	6.66425
20181218 1	89.8944	3.14219	97.6139	4.30527	104.561	7.92792	-10.1056	4.56093
20181218 2	85.3812	2.83937	97.0442	3.72755	101.412	4.79063	-14.6188	1.41232
20181218 5	69.8208	3.86237	87.9617	3.67523	101.825	4.59752	-30.1792	1.82522
20210930 4	79.4341	2.85983	86.4039	2.71383	94.2443	3.96451	-20.5659	-5.75573
20211014 1	93.281	3.91524	102.583	5.10104	104.887	6.30453	-6.71895	4.88699
20211014 1	92.0705	3.45358	97.9452	3.88688	101.522	5.64191	-7.92948	1.52205
20211014 1	92.3183	4.2166	100.972	5.46439	103.587	6.09985	-7.68166	3.58684
20211023 3	85.0755	3.256	96.6689	3.89425	101.887	4.5457	-14.9245	1.88656
20211023 3	86.666	2.92563	98.6388	4.61285	106.026	7.80701	-13.334	6.02566
20211109 50	128.424	10.6286	128.193	8.85013	127.356	7.74406	28.4237	27.3563
20211116 5	75.3566	3.17792	88.8634	4.0472	100.5	5.11635	-24.6434	0.499749
20211116 5	75.1086	5.9136	85.8832	3.98604	98.1837	3.80268	-24.8914	-1.81633
20211116 40	129.982	4.69196	105.676	14.3556	105.476	14.1653	29.9816	5.47568
