# Supplementary material for: A mechano-osmotic feedback couples cell volume to the rate of cell deformation
Source: eLife journal article supplement (doi:10.7554/elife.72381), 2022-04-13
Supplement: supp [file ALL control and Y-27 on PLL-PEG.xlsx]

## Sheet: control
20171218	20171218	20171218	20171218	20171218	20171218	20171218	20171218	20171218	20171218	20171218	20171218	20171218	20171218	20171218	20171218	20171218	20200806	20200806	20200806	20200806	20200806	20200806	20200806	20200806	20200806	20200806	20200806	20200806	20200806	20200806	20200806	20200806	20200806	20200806	20200806	20200806	20200806	20200806	20200806	20200806	20200806	20200806	20200806	20200806	20200806	20200806	20200806	20200806	20200806
1	2	3	4	5	6	7	8	9	10	11	12	13	14	15	16	17	1	2	3	4	5	6	7	8	9	10	11	1	2	3	5	6	7	8	9	10	11	12	13	14	15	16	17	18	19	20	1	2	3
100	100	100	100	100	100	100	100	100	100	100	100	100	100	100	100	100	100	100	100	100	100	100	100	100	100	100	100	100	100	100	100	100	100	100	100	100	100	100	100	100	100	100	100	100	100	100	100	100	100
100.295	99.4723	98.6617	100.572	101.047	96.9628	99.0778	101.512	98.9221	99.2171	99.1837	99.3026	102.034	98.7085	98.7939	99.8716	99.774	100.264	102.638	101.523	101.793	100.016	101.973	98.712	99.3653	100.025	100.236	100.904	99.9256	98.7401	103.171	99.293	99.3139	101.746	101.512	99.8543	99.3025	99.9691	98.1797	100.632	99.6675	98.5253	100.746	100.378	98.2646	99.5925	100.252	100.001	99.3607	99.8138
101.469	99.2182	98.0374	98.8776	102.98	94.2079	98.4672	102.278	96.856	99.8404	100.218	99.3587	102.785	101.036	99.4273	100.007	101.334	99.8906	100.475	101.97	101.909	99.2	100.336	98.0301	99.6738	98.2511	100.945	101.829	99.0125	99.1376	100.58	99.0066	97.4079	101.08	101.256	98.3335	99.3669	99.0615	99.2392	100.253	99.167	98.1908	101.746	100.518	99.5201	99.7602	100.428	100.088	97.8147	100.54
102.057	100.274	97.2947	100.026	104.137	93.1078	97.2264	101.486	96.7015	101.015	101.41	98.7935	104.122	99.1714	98.4638	99.6208	101.472	99.8043	103.271	100.506	101.658	101.376	99.1081	97.8619	99.8878	98.778	100.91	101.097	100.238	99.1423	101.042	98.8	97.4065	102.566	101.675	97.8992	99.8412	99.225	99.8875	99.8586	99.2706	100.227	102.212	100.415	98.9279	100.443	100.516	101.583	98.3316	100.52
103.11	100.193	96.0988	101.111	103.983	91.9765	95.6462	102.18	94.8635	102.172	104.839	98.898	103.388	99.618	97.7991	100.19	103.034	101.363	103.738	101.895	102.137	101.152	99.9992	97.9069	97.6602	99.9603	99.9713	100.885	101.408	98.8575	100.663	98.5265	95.8539	104.591	102.468	97.4801	99.365	100.791	99.0218	99.764	100.508	97.5407	102.235	101.669	99.6117	99.1245	102.097	101.362	97.6461	102.532
103.525	100.315	95.209	100.78	104.559	91.0581	95.6103	103.066	95.3374	103.97	106.237	98.3173	104.52	99.5731	97.6615	101	103.024	100.462	104.441	102.237	100.915	101.53	101.334	97.9392	99.1424	100.996	101.059	99.6561	100.992	98.7593	100.342	99.993	95.2724	102.151	102.093	96.7128	100.214	100.134	100.748	99.961	101.227	100.22	103.583	102.616	99.3561	100.405	102.431	101.209	97.0798	102.877
103.307	100.948	95.0933	100.431	105.739	90.9625	92.7115	101.737	94.0784	104.115	108.579	98.1799	104.762	99.6221	97.7097	101.733	103.253	100.498	102.051	104.207	101.163	102.539	98.8134	97.2762	100.68	101.755	100.592	101.536	102.709	100.496	100.147	99.7893	95.7923	103.636	103.221	95.2562	99.3286	99.461	100.067	99.5946	101.156	101.979	103.939	102.435	99.1405	100.893	102.311	100.606	96.804	101.096
103.467	101.671	95.6731	100.824	105.294	91.0165	92.3745	100.975	93.8309	104.254	109.391	97.0255	106.989	99.2446	98.1856	100.963	104.928	99.5072	103.71	102.433	103.189	105.051	99.5623	98.2593	100.65	100.288	100.926	100.83	103.556	100.833	99.4846	98.3899	95.538	104.549	101.68	97.0952	101.052	99.3962	100.085	99.984	100.016	101.169	104.086	102.146	98.5512	101.07	104.11	101.811	96.1613	102.785
102.957	101.117	94.2782	99.9526	104.267	90.6799	91.1069	101.092	93.4494	106.237	110.392	97.2021	103.706	100.526	98.7034	101.591	104.225	101.155	104.004	102.892	101.759	104.87	98.649	97.8032	100.421	101.95	98.5427	99.6655	103.492	100.603	100.404	98.4764	94.9867	103.158	100.955	96.5304	99.4902	99.6658	99.5946	97.9915	102.491	102.155	106.619	101.895	99.0891	100.634	102.52	103.313	97.6009	103.415
102.746	102.346	94.3977	100.894	103.315	90.5144	90.8191	99.0886	91.2709	104.777	110.528	97.2427	104.408	100.488	97.4381	101.207	105.105	99.5192	103.869	103.289	102.232	105.292	99.0913	98.6362	100.896	102.588	99.1811	101.139	104.18	102.712	98.9148	99.2947	94.8125	103.849	101.688	96.8191	99.6136	98.8494	100.186	100.019	101.997	103.21	106.24	101.976	99.6642	101.085	101.582	103.06	95.5962	103.733
103.019	102.008	93.6886	102.2	103.105	90.6012	91.5395	100.075	91.8841	106.535	112.816	96.6664	102.854	99.4986	97.3604	102.481	105.152	102.741	103.055	101.157	103.473	104.475	100.361	98.6032	101.606	99.282	100.72	99.4162	104.749	101.659	98.2829	98.5064	95.4257	103.773	101.302	97.2293	98.4648	99.2358	99.0221	99.8166	102.47	104.237	105.637	101.28	98.7093	101.303	103.858	100.591	94.7141	103.427
104.292	102.955	93.6022	101.379	101.719	89.6934	91.4147	99.9997	89.6523	106.393	112.687	95.6186	103.763	99.5164	96.9667	101.862	105.569	101.219	104.173	104.27	103.351	105.345	98.8445	97.8772	102.603	101.817	99.4899	102.359	104.417	101.623	96.7697	97.7902	94.8618	104.619	101.714	95.4475	99.2866	98.3361	98.1258	98.7707	104.521	103.423	107.088	102.229	100.265	101.339	103.862	101.458	96.131	103.391
102.702	103.244	93.4394	101.074	101.196	89.7721	90.0496	98.3245	89.5905	105.589	112.99	95.9306	104.622	100.622	98.819	101.418	106.018	100.6	103.306	104.764	103.309	104.645	97.9968	96.9169	105.047	102.29	99.9599	101.208	105.393	100.862	100.275	99.5243	95.8244	102.9	102.291	94.9405	99.202	97.5887	98.607	97.3318	102.135	103.847	105.917	100.803	98.8002	102.76	103.136	103.07	96.5013	103
103.49	103.182	92.9151	103.116	101.259	89.9405	89.4966	98.0382	87.4706	104.79	114.749	94.7569	104.624	98.585	98.3874	102.014	106.272	101.354	105.479	103.921	102.062	106.583	99.1573	96.3245	104.106	103.634	99.0417	101.268	106.818	103.847	97.0837	99.3339	96.2371	103.5	101.481	93.6451	101.02	98.3016	98.1722	98.0102	104.532	104.76	104.346	102.688	99.2722	101.846	104.919	101.186	94.2742	104.485
103.071	101.913	92.6278	102.567	100.117	90.1906	91.0311	97.7457	88.34	105.448	113.973	95.5851	104.46	98.9522	96.347	101.395	106.77	101.136	104.52	104.021	102.411	106.619	101.363	96.717	102.98	101.552	100.132	101.894	106.065	101.347	98.6959	97.8514	95.8772	104.025	102.157	95.7995	101.013	99.2297	99.4557	96.9967	102.506	105.1	101.691	102.058	98.249	104.416	103.843	102.729	94.3383	104.339
102.164	102.702	92.4284	103.608	98.8096	89.7229	89.8054	95.9832	86.7048	104.988	114.475	94.366	104.116	98.6518	97.403	102.261	106.061	100.23	105.571	104.025	103.821	105.925	100.111	97.59	102.866	102.007	99.3083	99.2657	107.689	101.212	100.183	98.3105	95.4981	102.65	101.041	97.3342	99.4053	97.6989	98.1491	97.4641	100.865	104.532	102.081	102.125	99.2369	105.635	104.514	103.561	95.3093	104.796
103.895	102.135	93.1388	103.668	100.042	89.7438	90.4374	97.2015	87.0258	106.728	114.645	93.9732	104.848	99.0484	98.4823	101.768	106.751	100.894	106.633	102.861	102.755	105.92	98.2965	97.9784	101.024	103.321	100.572	101.1	106.231	99.2363	98.0336	97.6321	96.2809	105.123	101.275	94.9772	101.828	98.2984	99.2083	97.0777	103.937	104.209	102.07	101.861	100.179	103.97	102.7	102.895	93.9606	103.808
103.377	102.386	92.215	103.921	100.125	89.6126	90.9353	96.2316	86.5348	105.534	114.955	93.1488	104.732	97.6154	99.2665	102.431	106.922	101.545	105.932	104.784	103.459	104.77	99.6902	97.0999	99.3352	104.754	100.135	100.477	108.916	100.225	98.8442	97.8804	96.0714	103.892	103.378	96.2635	99.0146	97.3056	99.0501	97.1132	103.172	105.61	101.44	101.743	99.3431	104.829	102.263	102.319	94.4142	103.689
104.259	103.332	92.3196	103.646	100.185	89.8455	89.7835	96.7716	86.7319	105.598	113.705	93.2519	105.594	98.6989	98.7113	102.575	106.579	101.857	106.865	105.889	105.353	103.936	100.951	97.1401	98.8777	101.677	99.8672	100.762	108.43	99.1703	98.5467	98.0373	96.137	105.834	101.909	94.4881	100.814	98.3244	99.382	96.7242	104.333	101.798	99.8045	103.187	100.544	105.878	104.828	102.378	96.0568	102.432
104.735	102.585	92.3253	102.912	100.593	90.5586	90.0278	95.8613	87.9265	105.93	113.411	93.2154	105.937	97.19	98.6717	101.95	107.402	101.798	105.005	105.313	103.469	104.208	97.7243	97.6948	97.9955	102.72	99.3591	102.011	108.421	99.0915	100.564	97.4608	96.2966	105.851	102.683	95.0842	99.8671	97.7354	98.951	97.3746	104.772	104.951	101.222	100.858	99.3736	106.193	103.189	103.185	95.588	103.624
104.592	103.437	91.3628	103.757	100.634	91.1469	91.0019	95.6885	89.0392	104.885	113.497	93.289	104.887	97.9366	98.7676	101.899	108.151	101.564	106.224	105.561	104.569	101.698	98.1558	96.7653	98.0599	105.203	99.124	101.691	110.17	100.338	98.8702	96.8656	97.0979	106.803	104.451	96.3786	99.3901	97.7459	99.7666	96.919	105.165	104.622	99.4877	104.344	99.4001	106.4	102.257	102.15	96.587	103.417
104.408	103.286	91.3828	104.185	100.407	90.4047	91.2085	94.9503	87.7575	105.576	113.818	92.3487	105.381	97.358	98.7264	101.242	107.109	101.125	106.699	104.773	105.116	103.343	99.4775	97.239	96.6472	101.932	100.915	100.485	109.005	100.663	98.0472	97.6666	97.7525	108.879	103.625	96.3163	102.35	98.5112	99.951	96.7499	104.3	103.612	99.6309	104.215	98.5251	105.732	102.458	103.33	96.4336	105.193
105.166	103.506	92.5183	104.052	99.5851	89.5855	90.1728	94.1575	89.3165	103.822	112.022	92.1608	106.161	96.912	101.429	100.773	106.496	100.128	105.682	103.301	106.999	103.647	100.079	98.1579	97.6201	103.705	100.516	99.6583	110.089	100.141	100.034	96.7163	97.6275	109.218	103.641	95.1492	100.46	98.9335	99.6148	96.6161	103.097	105.579	100.145	103.187	99.6292	107.257	103.079	103.938	95.3328	104.344
103.129	103.219	92.2083	102.948	100.198	89.8842	90.1144	95.0571	88.7905	104.609	112.691	92.2654	110.144	98.7757	100.776	100.646	107.427	100.903	106.872	104.382	104.262	102.36	100.483	97.5253	98.2041	103.714	101.417	101.225	110.435	100.255	101.39	97.2733	96.7091	108.837	103.644	94.2572	100.881	98.6541	99.4691	96.8938	104.837	103.048	100.702	104.076	99.6277	109.838	101.13	103.857	97.529	105.011
104.095	102.287	92.4023	103.251	99.1407	90.2216	89.2781	94.1841	89.3901	103.281	111.642	92.4951	109.213	98.5745	97.9948	100.95	107.118	101.52	106.961	103.47	105.236	102.774	102.021	97.5329	99.4025	103.565	103.069	100.396	109.029	100.134	99.3665	96.3718	97.2908	107.679	105.718	94.2501	100.88	98.4033	99.2711	95.5917	103.464	103.908	100.108	103.398	100.842	107.399	102.735	105.823	99.0582	103.48
105.617	102.625	92.0849	103.925	99.3538	89.416	90.0471	95.1605	89.0955	105.257	111.663	93.1552	110.297	97.8914	100.182	100.769	106.722	102.075	106.457	106.61	106.445	102.348	103.368	97.7511	100.752	103.984	101.571	98.7371	110.982	99.1553	99.0263	96.6616	98.003	108.915	105.709	93.9629	100.884	100.259	99.6381	96.9128	103.122	103.948	100.296	103.845	100.701	108.905	102.776	105.537	98.3401	103.524
105.418	103.244	91.5919	104.696	100.502	89.4305	90.8386	95.4281	90.08	103.741	113.955	92.5755	109.376	98.6786	99.7415	100.686	107.211	99.6031	107.52	105.122	106.35	103.833	102.267	98.9655	100.77	105.716	103.79	101.428	109.274	101.233	100.6	97.2189	98.3535	109.364	106.322	96.0769	102.944	99.7498	100.392	96.6021	103.813	102.595	102.869	105.111	101.666	111.303	103.832	107.386	101.176	104.84
106.553	104.148	92.1229	105.671	100.298	90.222	90.5098	93.5797	89.4404	104.028	113.617	93.1552	111.878	97.7507	100.61	99.837	106.368	101.432	106.598	105.254	105.7	103.157	104.055	97.9579	101.774	105.993	104.68	102.052	110.611	101.487	99.2475	95.6453	97.1727	109.708	106.483	96.6134	101.01	99.985	99.7999	96.592	104.707	103.69	102.696	104.15	101.877	109.026	105.071	105.701	101.049	102.445
106.556	104.146	92.462	103.63	101.344	91.6084	90.6437	94.7848	92.0405	105.812	114.167	92.3108	112.479	99.3209	100.26	100.018	106.189	101.37	108.442	104.562	106.577	102.378	103.814	98.6542	103.084	104.35	103.353	101.448	111.527	101.87	100.489	95.744	97.5633	109.725	107.051	97.3643	100.657	100.535	100.299	97.2404	105.544	103.621	102.419	104.327	101.865	110.388	104.47	105.09	103.549	104.038
105.469	103.972	91.4402	103.13	102.29	89.7319	91.6053	97.1784	90.296	105.644	113.854	93.0385	113.016	98.9971	99.7152	99.163	106.586	102.561	108.451	106.174	105.853	102.502	103.816	98.4261	103.932	104.57	105.726	100.135	109.082	102.683	100.576	97.1113	98.0049	109.358	107.865	98.4731	99.2437	99.4724	99.4627	96.4257	105.117	103.958	103.677	103.949	101.086	109.863	106.028	106.245	102.456	106.224
106.749	104.075	91.2283	105.386	100.69	90.2751	90.522	96.2179	91.9739	106.532	113.832	92.3694	113.314	98.9116	101.743	100.378	107.097	101.267	108.222	107	104.751	102.539	103.099	98.2968	104.495	104.708	104.525	100.121	110.171	101.947	99.4795	96.2335	97.9636	110.167	108.918	97.5977	100.582	101.257	97.9101	95.6204	102.673	104.32	103.713	104.858	101.589	109.973	105.116	109.243	104.428	105.421
107.932	104.285	91.1524	105.354	101.532	90.8547	90.7305	96.921	93.021	107.079	112.235	91.7878	113.042	99.1834	101.445	99.1982	107.69	101.471	106.612	105.415	106.287	102.605	105.505	98.7809	104.148	105.267	106.333	100.844	112.186	103.178	101.564	96.229	97.4806	111.258	108.279	96.6247	101.943	100.634	101.595	95.5497	103.199	101.432	103.237	103.869	101.616	108.084	103.42	108	103.094	106.299
107.677	104.11	92.0299	104.305	102.763	89.9997	91.1032	97.2361	91.8556	106.741	112.763	92.0872	115.037	99.0757	100.908	99.6499	107.861	101.3	108.301	108.227	106.04	103.17	105.142	98.1431	104.776	105.698	106.511	101.929	109.752	101.725	99.8066	96.417	97.6947	110.851	109.354	98.1713	100.042	101.733	101.098	95.1885	105.484	102.914	104.325	104.586	100.643	109.411	105.664	107.274	100.509	105.132
107.351	103.217	91.3018	105.075	101.689	90.7272	91.6985	97.7239	91.7519	106.461	114.246	91.0096	115.715	99.3618	100.593	100.111	107.467	100.622	107.773	106.128	106.155	102.39	105.563	97.7333	106.185	104.867	105.755	101.678	110.053	105.048	100.325	94.0224	96.8238	111.277	110.018	99.0149	100.144	100.711	101.317	96.0706	106.284	103.058	105.797	104.572	102.077	110.554	105.168	106.476	100.635	105.79
108.342	103.947	91.6251	104.088	100.864	91.6306	92.0568	99.3225	92.8233	106.272	114.208	92.6456	119.315	99.1385	102.084	99.5164	108.714	100.68	106.681	104.759	105.886	103.432	105.469	98.7992	104.834	105.441	107.436	100.101	108.31	104.427	102.069	94.3207	97.7884	112.777	108.106	100.104	101.154	99.6398	101.168	96.8688	105.912	103.951	106.009	104.847	101.12	109.334	105.128	108.946	100.65	105.575
109.001	103.747	91.1931	104.738	102.413	91.5549	91.364	98.8574	93.3635	106.842	114.229	93.1589	118.681	98.6097	101.158	99.869	107.676	101.244	105.783	106.9	105.694	104.284	107.833	98.3981	105.582	105.33	104.979	100.323	109.61	102.773	102.424	93.738	97.6751	112.279	110.045	98.2081	100.571	100.288	100.387	97.6392	104.999	103.024	105.721	106.463	101.879	109.173	104.955	107.771	100.132	106.433
109.507	103.484	91.953	105.279	101.093	91.9872	91.1706	99.5429	95.1173	107.166	114.509	92.4705	119.983	100.187	101.454	99.7356	108.027	102.337	106.942	108.028	105.32	104.525	105.312	97.1144	106.868	105.274	106.731	100.721	111.468	103.343	101.564	93.5311	97.5112	111.463	109.892	100.896	101.622	100.093	101.418	95.983	104.316	105.373	108.112	106.36	101.856	110.611	103.743	108.889	100.375	106.436
108.62	104.938	92.1769	105.411	102.626	92.404	92.7926	100.274	93.478	108.531	113.745	92.9814	121.193	99.7426	100.776	99.7986	108.003	101.734	108.678	108.384	105.545	105.952	105.078	98.345	104.787	106.19	107.223	99.7091	111.266	101.751	101.403	94.0805	97.3921	110.987	111.216	98.5396	99.5867	100.422	100.666	97.2397	103.096	104.846	107.861	106.48	102.793	109.65	106.54	108.105	100.657	105.88
109.196	104.862	91.5838	104.79	101.006	92.2788	91.4312	101.274	94.7935	109.57	113.445	92.4468	124.138	99.4153	101.282	100.583	108.253	103.15	107.05	108.707	105.694	103.028	105.611	98.3082	103.131	105.732	107.405	100.438	109.957	102.496	102.235	95.4301	99.0194	110.646	110.905	98.9367	98.7696	99.016	101.251	96.424	105.32	104.351	107.237	106.795	101.59	110.458	104.351	108.574	101.392	104.723
110.726	104.022	91.5182	104.876	102.443	92.5778	92.2429	101.342	95.12	110.05	114.669	93.1459	123.262	100.768	101.466	100.775	108.174	101.171	108.72	108.953	105.361	105.853	106.367	98.1743	103.023	106.378	107.283	100.267	108.738	102.614	102.305	94.3388	97.5168	110.607	112.125	97.8986	100.241	99.8453	101.652	96.1222	104.466	104.313	108.732	106.734	100.856	110.869	105.712	111.459	102.145	106.786
																	103.109	108.307	109.744	105.594	104.456	106.288	98.4529	101.937	105.486	107.793	100.399	110.691	104.25	103.289	94.2271	99.0937	112.216	111.963	99.9564	100.564	102.239	100.252	97.2482	105.281	105.502	108.879	104.858	102.773	110.812	105.094	109.579	102.746	105.963
																	102.781	107.655	108.785	106.205	104.71	107.72	99.301	102.525	106.514	107.232	100.003	111.115	102.464	103.047	94.5119	98.8774	110.619	112.393	100.086	100.618	101.501	101.8	96.9561	105.35	105.136	109.283	107.275	103.046	111.304	105.907	110.813	102.027	106.77
																	101.916	109.728	108.23	105.138	105.189	108.846	97.6263	103.11	106.307	108.641	100.208	109.716	104.212	101.984	94.1731	98.4615	109.863	111.905	100.776	99.7772	101.746	102.938	97.1753	103.276	106.434	110.432	107.753	103.972	108.88	106.793	110.505	102.364	107.477
																	101.827	109.786	107.604	106.402	106.038	107.211	99.9091	102.714	106.962	109.547	97.8688	111.256	102.572	102.499	92.7505	98.8401	109.412	112.244	101.482	100.442	102.001	102.31	97.228	103.857	104.518	108.339	105.315	103.606	112.791	105.824	110.029	102.763	107.445
																	100.639	109.61	108.543	106.341	106.838	107.58	100.633	103.312	106.904	109.074	99.6478	111.61	103.309	103.519	92.7164	98.1005	108.89	112.933	98.3846	99.4176	103.421	100.83	97.7268	104.339	105.446	110.82	106.947	102.377	112.024	104.17	111.124	103.025	105.14
																	101.968	108.416	110.175	106.113	105.665	107.322	98.8796	104.01	106.821	109.115	100.226	110.178	103.576	103.156	93.654	96.863	109.837	112.518	100.298	101.42	101.538	101.46	97.5016	103.551	106.563	111.825	106.694	103.053	112.295	104.09	109.341	101.646	105.394
																	102.206	108.801	109.471	105.348	105.862	109.376	98.8398	104.469	108.05	108.207	100.04	110.166	104.827	103.932	94.1516	97.6969	111.148	113.28	103.454	100.915	101.124	102.607	97.15	103.852	105.429	111.418	107.322	102.658	111.79	103.824	111.504	103.376	105.574
																	100.655	108.742	109.455	105.863	107.694	109.064	100.937	103.952	107.396	106.591	99.7838	109.306	102.258	103.807	94.494	98.2501	110.253	112.315	102.969	103.641	102.052	100.152	97.7749	103.349	105.535	110.952	106.172	104.972	112.975	105.026	111.997	104.397	105.531
																	100.895	109.457	110.049	105.802	107.064	107.693	98.1221	103.187	107.118	107.694	100.642	109.969	104.479	103.288	94.8132	97.835	109.906	112.889	103.092	101.22	102.091	102.464	98.6305	104.385	106.56	111.934	107.98	103.312	111.833	105.871	110.087	105.326	105.62
																	100.845	107.673	110.209	106.737	105.843	110.125	98.8418	105.584	106.506	107.82	99.3882	108.726	103.64	104.689	95.4075	98.084	109.653	112.025	103.569	101.454	103.639	102.432	97.4104	104.224	108.599	111.25	108.119	103.132	113.093	106.253	109.703	105.7	106.086
																	102.584	108.843	108.322	106.911	108.079	109.95	98.4615	104.941	106.522	108.955	99.9887	109.856	102.419	102.953	95.0996	99.1981	109.783	112.188	103.497	101.915	102.655	101.689	97.081	104.256	108.186	108.193	109.127	103.509	111.796	105.459	111.449	104.345	104.299
																	102.807	109.067	109.389	104.693	108.68	109.229	99.37	106.451	107.106	109.498	99.4219	111.465	104.226	102.931	95.2128	99.7651	110.906	110.86	103.451	102.532	102.892	102.055	97.484	102.956	107.467	110.879	107.283	104.269	111.807	104.85	110.268	105.018	107.365
																	101.179	108.765	109.089	105.262	108.991	108.61	99.3214	105.376	107.961	110.26	99.6599	109.277	104.206	103.625	95.6579	100.138	110.32	112.511	104.018	102.339	102.505	100.997	97.4096	104.114	108.308	108.861	107.367	104.724	113.485	104.851	110.517	104.439	107.811
																	101.914	109.001	109.637	105.211	108.04	109.668	99.7478	106.294	108.157	109.194	100.325	110.365	105.492	102.926	98.4266	100.524	110.634	111.902	104.428	102.278	102.65	103.633	98.828	103.281	108.389	111.991	108.104	103.963	111.231	107.566	111.117	106.198	108.311
																	101.938	107.529	109.102	105.199	107.799	110.973	100.489	105.523	109.726	108.668	99.432	110.48	103.217	105.144	94.7671	99.3266	109.736	111.375	105.223	102.861	102.303	101.526	97.2539	104.539	107.38	111.58	107.344	104.319	110.346	105.289	111.31	105.672	105.581
																	101.011	109.371	110.125	106.693	107.669	109.282	100.32	104.677	107.356	108.182	99.7711	108.256	102.968	103.359	95.5374	99.2906	109.325	110.612	104.781	101.413	101.949	102.753	96.425	105.375	106.703	109.915	108.402	105.54	111.668	104.325	109.921	105.896	107.887
																	103.439	108.066	108.746	104.503	109.178	109.182	100.954	106.277	107.461	108.788	99.5434	108.829	102.085	104.392	95.5064	98.3683	108.823	110.051	105.573	102.36	102.979	102.223	97.5619	104.003	106.876	112.258	108.181	103.231	113.515	108.032	109.373	106.625	106.044
																	103.487	109.68	110.551	106.221	106.623	109.807	100.995	105.167	109.036	108.343	100.511	110.27	103.918	104.714	94.9352	100.041	109.499	111.178	104.814	103.821	101.807	103.109	98.9559	103.155	109.362	111.068	108.746	104.796	110.841	106.751	109.623	108.403	105.281
																	102.206	109.751	110.118	104.962	108.379	107.964	101.027	107.503	109.453	108.945	101.493	109.266	103.502	104.357	94.8871	99.5246	110.144	110.142	106.735	102.027	102.016	101.822	97.7769	104.901	106.933	110.606	107.933	103.931	113.558	107.135	110.444	106.853	107.175
																	102.238	109.731	109.695	106.13	107.544	109.329	101.031	105.377	110.165	109.677	100.705	108.544	104.476	105.345	94.8803	99.1505	109.433	111.289	105.365	101.972	101.132	101.704	96.5692	104.489	107.274	111.591	107.323	103.451	113.499	107.576	109.73	107.264	105.998
																	102.331	107.37	109.695	104.834	107.627	109.17	102.733	106.881	109.179	108.625	101.583	108.716	104.127	103.455	93.6025	100.423	110.238	109.704	106.32	102.172	102.851	103.333	98.8799	103.845	104.284	111.965	108.864	103.976	112.965	106.601	112.562	106.153	106.246
[truncated: 308 more columns]

## Sheet: Y-27
20211005_1	20211005_1	20211005_1	20211005_1	20211005_1	20211005_1	20211005_1	20211005_1	20211005_1	20211005_1	20211005_1	20211005_1	20211005_1	20211005_1	20211005_1	20211005_1	20211005_1	20211005_1	20211005_1	20211005_1	20211005_1	20211005_1	20211005_1	20211005_1	20211005_1	20211005_1	20211005_1	20211005_1	20211005_1	20211005_1	20211005_1	20211005_1	20211005_1	20211005_1	20211005_1	20211005_1	20211005_1	20211005_1	20211005_1	20211005_1	20211005_1	20211005_1	20211005_1	20211005_1	20211005_1	20211005_1	20211005_1	20211005_1	20211005_1	20211005_1
1	1	1	1	1	1	1	2	2	2	2	2	2	2	2	2	2	2	2	2	3	3	3	3	3	3	3	3	3	3	3	3	3	4	4	4	4	4	4	4	4	4	4	4	4	4	5	5	5	5
100	100	100	100	100	100	100	100	100	100	100	100	100	100	100	100	100	100	100	100	100	100	100	100	100	100	100	100	100	100	100	100	100	100	100	100	100	100	100	100	100	100	100	100	100	100	100	100	100	100
101.099	99.3821	97.8659	99.0371	99.9081	98.4174	98.3748	98.7278	99.1594	99.6111	100.324	99.4167	100.222	101.587	100.221	99.9222	101.068	99.8633	100.127	99.6385	99.3658	100.103	99.5272	98.3012	99.4696	99.5155	99.7907	101.065	99.8568	99.3156	99.7123	100.4	101.292	99.98	99.8333	99.9743	100.615	99.0246	100.045	99.5942	99.3086	97.9924	99.9997	100.385	100.716	99.6266	100.396	99.9364	99.7011	99.5624
98.7936	99.1708	96.3972	99.628	99.7733	97.4028	97.5266	97.8842	99.3245	99.5521	100.835	100.175	100.537	100.937	100.254	100.068	101.554	98.8701	99.7434	98.9334	99.8768	100.132	99.443	99.2323	98.5925	98.8153	99.481	100.182	100.221	98.6464	99.079	100.067	101.375	99.9089	99.8451	99.795	99.9773	98.8103	100.793	98.7916	99.1624	97.368	99.7835	100.371	101.166	99.484	100.07	99.9823	99.68	99.4305
98.3023	99.2465	94.9595	99.3914	100.583	96.6306	96.9551	99.0203	100.614	99.5531	100.004	99.4865	99.3267	100.907	100.662	100.477	102.738	98.0419	98.9408	98.2473	99.666	101.351	98.6093	100.478	97.5442	99.2452	99.5806	100.627	100.811	98.5795	98.1329	100.587	101.411	102.02	99.4128	98.9935	99.2905	98.9439	100.816	98.7542	98.263	97.5151	99.5913	101.136	101.53	99.2925	100.668	99.6454	99.268	98.3053
98.4095	98.3926	93.1942	98.7975	100.544	95.1868	96.5882	97.8168	99.8333	98.9276	101.93	98.7287	99.7521	99.4829	99.9676	100.195	103.105	97.242	98.9448	98.223	100.054	101.015	99.1841	99.1109	96.8963	100.169	99.3115	100.638	101.509	98.2396	97.8377	100.678	101.113	101.04	98.7553	100.071	99.1468	97.9937	101.22	99.2129	98.0593	96.3421	99.3022	100.953	101.908	98.9709	101.513	100.344	99.0155	98.723
97.9665	98.756	92.0286	99.4179	100.85	95.2933	96.0818	99.0758	100.605	99.5958	101.512	99.2089	98.9473	100.18	100.308	100.622	103.708	97.6439	99.3184	97.0496	100.031	101.37	98.3855	99.6359	96.4297	99.7988	99.2914	100.437	101.803	98.0009	98.0408	101.077	101.217	101.799	99.5534	100.699	98.8686	99.009	101.224	98.7719	97.2261	96.7474	100.039	102.263	102.813	99.5277	101.164	100.592	98.5835	98.5815
97.9308	98.8087	92.3768	100.295	100.739	95.2766	96.0539	98.0805	100.591	100.822	102.087	99.366	99.4938	99.6182	100.18	100.919	104.382	97.0373	99.7373	95.7393	100.557	102.741	98.8507	99.4631	96.5379	100.135	99.7188	101.889	101.519	98.5617	98.2498	101.064	100.685	101.199	98.4859	100.257	98.0891	98.9859	100.247	97.9635	97.7795	96.8356	99.7487	101.772	102.996	99.6895	102.235	100.494	99.2462	97.4989
96.7329	98.3953	91.8336	99.6873	100.858	95.2409	96.1708	96.6915	99.6329	100.029	102.648	97.7015	99.4245	99.5247	100.539	99.8808	104.414	96.4628	99.4981	95.6969	100.419	101.691	98.0871	99.9627	97.4685	100.669	99.66	102.165	101.34	96.9527	98.2227	101.41	101.261	101.049	98.596	100.302	97.8009	98.8555	100.068	98.4676	96.9853	97.4232	100.168	102.606	103.903	99.7517	101.178	101.328	98.6224	97.0001
97.28	98.2933	92.2994	100.85	101.083	95.0884	95.6939	96.8062	100.377	100.063	103.1	98.304	100.031	99.3865	99.7	100.54	105.107	96.5869	98.8135	95.5477	100.388	102.552	98.4703	99.1911	98.2033	100.654	99.709	102.874	102.671	97.6153	98.3696	101.338	100.337	100.918	98.4088	100.151	96.9009	99.0535	99.3203	97.3182	95.8121	97.6903	100.208	103.164	104.013	99.0532	101.67	101.09	98.5962	96.7497
97.2361	97.8748	92.3185	100.971	100.57	95.1052	95.9904	97.0182	100.497	100.368	104.424	98.8392	100.136	100.718	100.236	100.36	104.544	95.9002	98.8599	95.5293	100.788	101.42	98.5962	98.4731	97.5861	100.863	99.2658	101.754	101.704	98.3502	98.7635	102.151	99.6755	100.259	98.3173	99.8104	96.6628	98.8843	98.8597	97.4946	96.5322	97.445	100.658	103.544	105.608	99.9795	101.323	101.791	97.8049	96.4096
97.0232	98.0974	92.2552	101.4	100.706	95.9939	95.8065	96.6286	100.113	98.8427	104.544	98.4691	100.188	99.4301	100.444	101.253	105.293	95.9436	98.8927	95.4761	99.8232	101.099	98.0878	99.3291	97.5407	100.879	99.3028	103.041	102.681	96.8312	99.0499	101.879	100.172	100.98	98.3956	98.8757	96.1081	99.772	99.5498	97.5536	96.3856	97.1483	100.688	104.36	106.14	100.181	101.484	100.549	97.8325	96.0111
96.4219	98.4699	92.7636	102.007	101.319	95.4399	96.0641	96.0568	99.6708	100.097	103.705	99.0299	100.554	99.6473	99.7455	100.909	105.155	95.1825	98.7086	95.2818	101.143	102.052	98.4386	98.9812	98.334	101.186	100.136	105.19	102.336	97.5785	99.983	102.334	99.6856	101.005	98.3918	99.6097	95.1971	99.282	98.2412	97.514	95.3588	98.3765	100.422	104.346	106.153	100.569	101.62	101.07	98.2404	95.4488
96.2126	97.8592	92.7213	102.306	101.894	95.638	95.9832	96.7195	101.032	99.0788	104.609	99.4798	101.393	100.33	100.184	101.73	104.429	95.33	97.9163	94.8117	100.008	101.82	98.3096	98.7766	98.5097	101.172	99.8358	104.645	102.545	98.2219	99.9251	101.563	98.9452	99.8255	98.1459	98.6258	95.4051	99.4041	98.5453	97.7555	96.2372	98.3687	100.582	104.814	106.504	101.112	101.909	101.927	97.9938	95.3794
96.026	97.6131	93.3233	103.074	101.573	95.7439	95.9653	96.5794	99.2965	99.0164	104.167	99.0737	101.16	100.404	100.154	101.237	104.099	95.5666	97.878	94.6688	99.8044	101.027	98.3302	98.8967	97.8383	101.733	100.707	104.363	101.677	97.7957	99.9229	101.955	99.7219	99.6082	98.3305	98.6032	94.6407	99.9598	98.9246	97.5818	95.9801	99.9691	101.055	105.187	107.201	102.202	102.103	101.384	97.3322	95.0113
95.6805	97.5968	93.6073	102.628	101.764	96.1628	96.0865	95.7844	99.9253	99.3301	103.883	98.7599	101.547	100.04	98.8521	101.167	104.142	95.447	97.4155	94.2844	100.354	101.628	97.9331	98.5251	98.5278	101.447	100.994	103.18	101.312	97.9777	100.301	102.797	99.5871	99.9833	98.5576	96.9471	93.5292	100.297	98.1657	98.3978	96.957	99.3927	100.966	104.521	107.396	102.246	101.493	101.905	97.7175	94.0417
95.5845	97.321	93.7924	103.03	100.232	95.9628	96.0073	95.9504	99.9657	98.656	103.731	99.4353	101.88	100.22	99.7912	100.858	104.609	95.1308	97.6256	94.0799	100.42	101.448	97.889	97.7073	97.9524	100.786	100.937	104.489	99.7687	99.0325	100.733	101.453	98.8028	99.7903	98.9504	97.9934	93.4827	99.7598	96.7564	98.3057	96.0332	99.878	101.266	105.104	107.708	102.955	102.006	103.033	97.8679	94.3929
95.3051	95.792	93.684	102.066	102.376	95.9437	95.6591	95.9787	99.4826	98.4919	103.425	99.4237	102.419	101.237	100.193	101.086	103.722	95.3291	96.9163	94.1775	101.023	101.224	98.5346	97.6349	98.8022	101.373	100.658	104.197	100.323	98.7039	100.958	101.878	99.4852	99.0499	99.2837	98.2666	93.0861	99.2386	96.6475	98.603	96.1844	99.1569	101.838	104.933	108.322	102.777	102.51	101.418	97.9324	93.44
95.6527	97.2849	94.4488	101.761	101.385	96.019	96.1583	95.4773	100.019	98.8769	103.774	99.9426	102.229	100.048	99.1769	101.026	103.232	95.5922	97.1443	94.4059	100.992	100.935	97.2585	97.4364	99.1247	101.716	101.324	104.548	99.1827	98.8696	101.191	103.239	98.8353	99.4675	98.9469	99.3834	92.8922	98.9156	96.8031	98.0873	96.3251	100.335	101.631	105.171	108.506	102.785	102.418	102.766	97.9488	93.6396
95.3472	96.9321	93.6549	102.123	101.818	96.1853	96.3004	95.3536	99.8618	98.0649	103.877	100.159	102.13	100.786	99.3107	100.822	104.386	96.4871	96.8799	93.5898	100.751	101.005	98.3168	97.469	98.7529	101.89	101.372	104.344	98.7474	99.1717	101.203	103.487	99.8762	98.6956	98.7335	99.4865	92.1281	99.3625	96.8879	98.4754	96.1475	99.2495	101.156	104.922	107.188	104.02	102.644	101.771	97.7046	93.4537
94.2777	96.7405	94.428	101.891	101.622	96.1567	95.7897	95.7867	99.9242	97.7968	104.139	99.9641	102.485	100.176	100.104	101.602	104.892	96.6762	97.0716	94.5057	100.987	101.161	98.5916	97.2137	100.278	102.146	100.777	104.676	97.6655	98.3871	101.147	103.588	98.9591	98.5695	98.7111	98.6756	92.0611	100.148	98.2815	97.8166	96.8605	99.7663	101.627	105.165	107.152	103.541	103.473	102.474	96.9885	93.1106
94.2408	95.8478	94.4525	102.31	101.131	96.5919	96.2338	94.8497	100.338	98.2229	103.827	100.319	102.112	100.782	99.4348	100.647	103.976	95.958	97.6214	93.6197	101.04	102.019	99.0543	96.6249	99.3567	101.693	100.93	103.25	97.7015	99.2807	100.226	103.44	98.6777	99.0709	97.8186	98.9365	92.65	99.5289	97.1975	98.1289	96.9966	99.7944	101.226	105.465	107.484	104.008	103.543	102.433	97.4505	92.6663
95.3433	96.4736	94.1486	103.014	101.323	96.7875	96.2926	94.971	99.6433	97.6952	105.058	100.327	103.34	100.816	99.6925	101.045	103.88	96.893	97.8548	94.3844	101.448	101.495	98.8356	96.5379	99.4546	102.364	100.468	104.276	97.3324	99.9051	101.733	103.498	98.7363	99.3867	97.8311	96.4299	91.1776	98.8588	97.9229	97.5525	97.4715	100.143	100.681	105.617	105.722	104.308	103.093	103.807	97.6739	93.5692
94.9879	96.0958	95.0282	102.117	100.965	96.6875	96.28	94.6038	99.6545	97.2985	104.245	100.271	102.915	99.9654	99.3097	101.119	104.616	96.8538	97.5078	93.9986	103.299	101.107	98.7369	96.2133	99.6592	102.111	100.711	102.799	98.3426	99.6926	101.744	103.49	97.8878	99.1647	98.1653	97.065	90.8451	98.9204	97.0651	97.9915	96.5096	99.7669	100.905	105.755	106.494	104.815	103.556	103.558	98.2259	93.0027
94.5984	96.6924	95.4122	101.376	100.706	96.9144	96.4176	95.2097	99.9177	98.232	103.773	101.418	102.892	101.07	99.3987	100.075	104.68	97.1137	97.0151	94.0668	102.457	101.619	99.276	96.7793	101.207	102.87	100.615	103.304	97.1747	99.6688	101.395	103.999	98.5912	99.2559	97.6413	96.688	91.1614	98.8392	97.8276	97.8782	96.3331	99.6713	102.048	105.957	105.495	104.242	104.477	103.424	97.6522	93.0291
94.6651	96.1892	94.8037	100.877	101.016	96.7084	96.7002	95.5377	99.3144	98.3008	103.872	101.657	103.716	101.048	99.5896	100.675	103.885	96.8469	96.9528	92.7919	103.456	102.43	99.3432	96.2511	100.86	102.287	100.631	102.365	97.83	100.57	101.609	104.195	99.1767	98.694	98.1158	97.1977	91.039	99.6577	97.5904	98.0101	97.4313	99.5651	101.313	105.679	106.677	104.747	104.572	104.758	97.5375	92.9053
94.4167	95.4754	95.719	100.476	101.715	96.4214	96.7715	94.5971	102.023	99.1664	104.327	102.237	104.946	102.926	98.7734	99.994	104.374	96.7647	96.2013	94.3846	104.14	101.886	99.654	96.4705	101.211	102.28	101.695	103.17	97.7602	100.847	101.67	104.336	99.6802	99.5431	97.9901	95.6448	90.6435	98.4412	98.4948	98.4329	97.64	100.057	101.459	105.744	104.998	105.001	103.739	104.268	97.5273	92.2069
94.8429	94.6962	94.9407	99.7927	101.495	95.9574	96.8955	95.5435	99.502	98.8033	103.83	101.877	103.927	101.608	99.5105	101.016	103.33	96.652	96.273	93.8228	104.39	102.659	99.3782	96.2617	100.737	101.791	100.884	104.008	97.186	100.098	102.124	104.318	99.417	99.042	97.9931	95.9301	89.0996	98.1355	98.7008	98.3745	97.749	100.294	102.628	106.408	105.04	104.902	103.892	104.005	96.8574	92.3701
93.9608	94.8566	95.2796	98.5712	102.962	95.9155	96.8271	94.3287	100.384	98.0956	102.809	102.852	103.091	101.884	99.3418	101.043	104.021	96.1402	96.5205	93.9748	105.107	102.485	99.7004	96.1007	101.09	101.396	100.287	103.55	97.7952	102.06	101.884	103.815	100.65	99.1041	97.8085	95.4058	90.609	98.7074	98.4632	98.5697	97.4606	100.656	101.492	106.643	105.094	104.28	104.525	104.419	98.1603	92.7401
93.8093	95.825	94.7851	98.9127	103.497	97.0778	96.8453	96.433	99.7555	98.8766	103.542	102.863	104.345	102.21	99.435	101.114	102.941	96.3366	96.4811	93.6207	105.18	102.086	99.3738	96.5095	102.426	100.895	100.388	103.56	97.2623	102.284	101.391	104.297	100.56	98.6093	97.3221	95.0969	90.3226	98.6441	99.1891	98.7969	97.6777	99.9091	102.501	107.383	105.162	104.976	104.236	105.277	97.5232	92.0132
94.1489	95.4551	95.1869	99.7262	102.981	97.0357	97.5186	95.7649	100.241	99.147	101.759	102.495	103.747	101.862	99.2933	101.172	103.603	96.3864	95.903	93.3771	105.256	102.128	99.6015	96.7758	101.033	100.853	100.06	103.131	97.589	101.841	102.484	104.531	101.769	97.8287	98.0738	96.1336	89.6656	98.7957	99.3951	98.6773	97.6607	100.342	101.392	106.963	103.743	104.977	105.075	104.81	97.0558	92.1895
95.7256	96.7112	94.9714	99.0709	102.78	97.2631	96.9322	96.0424	100.929	99.7047	103.567	103.225	104.546	102.62	99.3277	101.283	102.67	96.4667	95.8559	93.341	106.08	102.19	99.5478	96.6831	102.079	100.44	100.054	104.308	97.3637	101.466	102.097	104.479	101.829	98.587	98.1076	96.0985	90.0425	98.5755	98.6399	98.4486	97.083	99.3772	101.346	106.995	104.891	105.404	105.201	105.414	97.3565	92.0657
94.3292	96.3186	95.9993	99.3324	102.994	96.664	96.6936	95.6228	100.675	99.4707	103.337	103.905	104.25	102.475	100.455	100.568	103.308	96.7668	96.0037	93.6858	106.926	101.832	100.535	96.6845	102.694	101.437	100.812	103.414	96.756	102.35	102.535	104.769	103.089	97.8854	98.2698	96.0701	90.5471	98.5632	98.2536	98.7369	97.3205	100.071	102.477	107.34	103.874	105.348	106.035	105.578	97.8607	92.061
94.9051	95.7205	96.0988	98.8727	103.677	96.4863	96.7684	95.367	101.021	99.2311	102.779	103.77	103.479	102.084	100.211	101.781	103.537	96.5461	95.7598	93.9953	106.919	101.955	99.9583	96.5212	102.335	100.148	100.116	102.828	96.9981	101.521	101.018	104.52	102.86	98.0585	98.5935	96.327	90.3254	98.9615	99.1744	99.0525	97.9415	99.8908	101.341	108.29	103.822	105.409	106.126	106.043	98.7105	92.1054
95.3454	96.6356	96.1805	99.1261	103.737	96.734	97.8552	95.1853	100.392	99.1185	103.288	103.915	104.499	101.626	100.621	101.657	103.049	96.0763	96.2795	93.4332	107.183	102.139	100.161	96.4898	102.981	101.636	99.9986	102.812	96.9918	102.589	101.707	104.606	103.48	97.5523	97.4421	97.3682	90.0784	98.6078	99.5804	99.1618	96.7375	100.284	102.067	108.168	103.683	106.209	105.837	106.977	98.2641	91.7603
94.311	96.0903	95.8787	98.6218	104.17	96.9561	97.7312	94.8104	100.458	99.7215	102.855	104.333	104.049	102.792	101.665	102.118	102.96	95.9953	95.6277	93.5335	106.301	101.712	100.25	97.3492	103.095	101.259	100.38	103.624	96.9079	102.59	101.426	105.099	104.117	97.6977	98.388	97.3709	89.7748	99.8581	100.481	99.1748	97.7182	100.424	103.071	108.386	102.896	105.949	106.696	106.482	98.7815	91.7831
95.2215	95.602	96.1863	98.3135	103.243	97.6986	97.3719	95.6807	100.033	98.9906	102.673	103.789	104.309	101.692	101.756	102.804	104	96.2178	95.6751	93.4686	106.731	101.292	99.8914	97.0105	103.296	100.984	100.51	103.267	96.3932	102.579	100.918	104.671	104.855	97.9953	98.0134	97.6619	89.4154	99.8743	101.07	99.3461	98.3138	100.062	101.48	109.037	102.986	106.471	106.548	105.524	98.5829	91.2952
94.8938	96.1761	96.8311	97.4698	103.087	97.0246	96.7411	95.2973	99.7032	98.9204	103.101	103.929	102.937	102.859	102.424	102.536	103.491	96.9472	95.5696	94.2161	106.459	101.255	100.308	96.8369	103.381	100.993	100.582	103.551	96.4002	103.396	101.432	104.956	105.854	97.5278	98.6912	97.4422	89.5219	99.0736	101.408	99.0277	97.9805	99.916	102.142	110.025	102.704	106.532	104.211	106.235	97.7795	91.1159
94.6005	96.5654	96.8315	97.4258	102.874	98.5056	97.7409	95.2749	100.701	100.226	102.696	103.956	102.982	102.338	102.266	102.82	102.879	96.6152	96.0881	94.0706	106.462	101.77	101.062	97.4591	103.766	101.807	100.884	102.466	97.7916	103.604	100.428	105.027	106.596	97.0635	99.4909	97.7113	89.5175	99.118	99.809	98.8487	98.4526	99.6179	102.888	109.621	102.583	106.282	103.013	107.668	97.938	91.9385
95.3187	95.3729	96.9648	97.5495	102.997	98.3841	98.1194	95.4187	101.065	99.8928	103.228	103.97	102.766	103.231	102.297	103.098	103.276	96.663	95.979	94.2073	106.883	101.061	101.448	98.2554	104.187	101.294	99.9454	103.157	97.5327	102.948	100.157	106.068	107.506	97.4707	98.5702	98.026	89.3283	98.5906	101.478	98.2896	98.5231	99.8033	102.562	109.613	102.286	106.279	107.004	107.8	98.3383	92.0061
95.4775	96.844	97.591	97.2552	102.957	98.1718	98.1743	95.6524	102.038	100.303	102.501	104.526	103.114	103.097	102.772	104.093	102.501	96.4993	95.5298	93.7778	107.479	101.471	101.327	97.1229	104.319	100.772	99.9697	101.831	97.9575	103.112	99.712	105.936	107.703	97.1112	98.1478	97.7439	89.9316	99.787	101.438	99.0352	98.0578	99.1958	102.171	110.072	102.5	106.632	103.168	108.856	98.1114	91.5535
94.77	96.8048	97.5063	97.7639	103.106	98.7365	97.1855	94.4779	100.011	101.075	102.063	104.597	103.461	103.671	103.918	103.536	102.842	97.3554	96.112	94.1541	106.231	101.092	101.513	97.4913	102.807	101.244	100.916	103.224	97.6409	103.504	99.6723	105.581	109.028	96.5252	99.0256	98.2348	89.1149	100.356	100.501	99.2065	97.681	100.035	102.473	110.418	102.24	106.533	103.476	107.278	98.1547	91.5676
95.2321	96.1264	97.8733	98.4021	104.12	99.2084	98.3885	95.2037	99.5002	100.129	103.936	104.364	103.037	105.185	104.401	104.037	104.599	97.5502	96.4123	93.82	106.573	101.458	101.8	96.6742	104.127	100.803	100.432	102.168	96.9378	103.072	99.3256	106.773	110.771	96.4217	98.7398	97.5291	88.8323	99.5485	101.294	98.8103	98.038	100.088	103.33	111.173	101.654	106.522	104.121	106.911	99.1125	91.1492
95.2785	95.1082	99.1098	96.7966	103.702	98.7246	98.4421	95.8626	100.477	100.521	103.483	103.972	103.121	105.15	104.648	104.133	103.18	97.0694	96.2819	94.7461	105.957	101.88	102.155	97.099	104.81	101.338	100.797	102.122	97.8987	103.323	100.155	106.709	111.192	96.6857	99.6551	96.6606	89.0027	99.315	101.487	98.2031	98.2251	99.4635	102.772	110.843	102.315	106.437	103.389	109.371	98.8154	91.5568
95.6627	96.0687	98.7919	96.8626	102.76	98.8642	99.1302	95.3042	100.829	101.569	103.346	104.975	102.99	104.779	105.082	104.744	102.27	96.7929	96.5272	94.3268	105.881	102.094	102.581	98.3407	105.375	101.372	100.567	102.363	97.155	103.059	99.4522	107.436	110.364	96.4064	99.5281	96.5974	89.2822	99.0329	102.02	98.9772	99.1365	99.4262	104.182	111.121	101.916	106.486	104.721	108.879	98.5731	91.3463
95.7398	96.7402	98.9129	96.9736	103.811	98.4003	98.7158	95.8524	99.8656	101.822	102.435	104.361	103.104	106.232	105.061	105.379	102.712	96.971	96.0417	93.6023	105.405	101.337	103.405	98.0535	105.276	101.905	101.336	103.862	97.7716	103.237	99.5265	107.409	112.283	96.4244	99.9473	97.5383	88.8506	99.7717	101.905	98.5675	98.7744	100.278	103.953	110.781	101.841	107.171	104.804	109.641	98.9397	91.1774
95.7905	96.4242	99.7564	96.52	103.063	98.6269	98.4896	96.509	99.2651	101.721	102.472	105.399	102.781	106.183	104.994	105.516	102.723	97.1501	96.3302	95.0694	105.988	101.444	103.094	97.7455	105.465	101.93	100.316	103.415	97.7803	103.929	99.7602	108.128	112.144	96.0456	99.77	97.8788	88.8209	100.407	102.086	99.0014	98.784	100.418	103.582	111.516	100.596	106.881	104.23	109.785	98.9605	90.6702
96.4396	95.6568	99.0596	96.0304	102.818	99.6186	99.0091	96.252	100.476	101.307	102.912	104.522	102.437	105.999	105.158	106.174	102.135	98.2724	96.3564	94.2256	104.247	100.503	103.205	97.694	105.458	101.789	101.378	103.134	97.4666	103.624	98.1554	108.843	113.157	96.0124	99.3915	97.4993	87.6929	99.6613	103.22	98.6558	99.3617	99.0192	103.529	111.462	102.283	107.419	104.55	109.727	99.1472	90.8117
96.6883	96.9418	100.064	96.3652	103.478	99.2767	98.5951	95.7305	100.834	102.08	102.945	105.711	103.372	106.708	105.455	106.334	101.487	98.1738	96.2037	94.5955	104.801	100.988	103.72	98.0535	105.849	102.492	101.367	101.971	97.0788	102.825	97.8602	109.581	112.737	95.6391	99.5791	97.8334	88.4138	99.9584	102.642	100.134	99.3688	98.7206	103.969	111.247	101.119	107.045	105.023	109.269	98.8407	90.5771
96.8573	97.0253	100.628	96.5639	103.466	100.159	98.7396	95.6289	100.096	101.895	102.731	104.653	102.721	106.632	105.767	106.723	102.168	98.6788	96.5357	94.5663	103.922	100.635	104.991	98.6685	106.166	102.513	101.46	103.347	98.6004	104.148	99.57	110.04	113.417	95.5497	99.5052	97.5355	88.0818	99.5983	103.099	99.3835	99.1071	100.085	103.903	111.613	101.376	107.693	104.518	109.693	99.022	90.5673
97.5097	97.3789	101.064	96.1463	102.946	100.215	98.5481	95.7481	101.37	101.318	102.69	104.756	103.381	106.105	106.04	107.283	102.424	98.5011	95.6108	95.0932	104.156	101.148	106.363	98.0378	105.25	102.289	101.083	103.141	97.7238	103.449	98.7614	111.042	113.776	95.7471	99.988	97.6972	88.5143	99.8329	104.276	99.4308	99.4297	98.669	103.086	111.874	100.741	108.217	106.028	109.877	100.024	90.6539
97.6225	97.8615	101.309	95.6368	101.626	100.369	99.1345	95.9272	100.644	101.001	102.381	104.49	102.786	108.15	105.971	108.514	102.426	98.866	96.7984	94.6422	102.797	100.768	106.134	97.8035	105.989	103.299	101.388	102.2	98.0765	103.798	98.6872	111.222	113.411	95.2633	100.008	97.4637	88.5533	100.238	103.585	99.8105	99.4055	98.3589	103.652	112.205	100.505	107.356	104.695	109.983	99.1151	91.4657
98.4908	98.175	102.051	97.323	102.373	100.354	99.6206	95.1403	101.944	102.258	103.813	104.223	105.355	107.564	103.3	106.513	107.568	100.252	96.8202	95.9782	102.641	100.967	105.093	98.1249	106.61	103.066	101.709	103.755	97.6805	102.564	98.5623	110.872	113.623	95.7551	99.7025	97.9746	86.9135	100.048	103.404	99.8416	99.2198	97.5366	103.556	111.819	99.8962	107.153	105.067	110.352	98.721	91.1571
98.7732	98.4801	102.173	95.82	100.567	100.85	100.205	96.4553	101.138	100.836	102.685	105.352	102.702	107.814	106.478	109.096	103.961	99.0265	97.5984	94.0244	101.677	102.101	106.09	98.6673	106.813	103.453	101.419	102.231	97.8088	102.783	98.6088	110.557	114.242	95.512	99.5797	97.955	88.1253	99.4952	103.771	99.962	99.2556	96.8742	103.876	111.972	100.764	107.663	105.907	110.601	99.4579	90.9773
98.4535	98.0988	102.604	97.1354	101.258	101.315	100.332	96.608	100.787	100.858	102.685	104.549	102.449	107.541	106.035	109.618	103.754	98.493	96.6028	94.5733	100.827	101.595	106.729	98.2052	107.047	103.846	101.204	103.541	98.1237	102.407	97.6813	109.986	114.028	96.2137	99.5549	99.7004	88.848	99.2283	103.992	100.268	98.6207	96.8366	102.395	112.184	100.257	107.136	105.405	110.968	99.1917	91.0427
98.6813	98.6445	103.301	95.6168	99.3771	101.329	99.7833	97.4344	101.519	100.661	103.363	104.484	103.441	106.756	104.925	109.801	104.489	99.2288	97.6311	95.3309	101.434	101.342	106.929	99.0922	106.761	103.687	101.644	102.755	99.2514	101.335	98.0121	109.255	114.05	95.1095	99.0968	97.9192	87.8306	99.8606	104.44	100.735	99.158	97.4572	102.74	112.459	98.7464	107.765	105.754	112.062	99.0219	90.5782
97.5809	98.158	103.562	95.9605	99.1717	101.228	99.7015	96.6204	100.866	101.702	102.552	103.621	103.61	107.394	105.102	109.784	103.544	98.8592	97.7061	94.6507	100.556	100.935	107.147	98.6645	106.584	104.223	101.948	103.352	99.1061	102.696	98.123	108.484	114.144	96.2898	99.9581	99.0315	88.4748	100.423	105.499	101.497	98.8541	98.2444	103.31	112.642	100.113	107.909	106.377	111.382	99.201	90.7348
98.9386	97.7303	105.178	94.9635	98.1004	100.953	100.515	96.9383	101.561	101.846	102.941	103.482	104.083	107.206	105.256	109.769	103.513	99.7584	97.9941	95.3165	100.173	101.04	107.029	99.3606	107.24	103.711	102.462	103.373	98.8521	101.987	98.5577	107.894	113.5	95.9895	100.562	97.7882	87.6964	100.063	104.89	100.604	99.2674	97.6212	102.95	112.374	100.248	107.12	106.606	111.434	99.2269	90.9619
99.2394	98.5182	105.327	95.5372	99.2214	101.606	100.597	97.1699	101.742	101.49	102.922	103.632	104.025	106.454	105.134	110.131	104.286	100.257	98.3595	94.7369	99.6004	100.68	107.323	99.2898	106.653	104.517	102.529	102.187	99.004	101.564	98.6749	108.185	113.545	96.1445	100.764	98.2854	88.2047	99.9431	105.714	101.319	99.0465	98.9966	103.457	112.292	100.415	107.696	106.514	110.189	98.9724	91.5967
98.213	97.8728	105.809	95.1861	97.9059	101.881	100.609	97.3726	100.833	101.114	103.857	102.682	103.701	106.555	104.178	110.721	104.423	100.552	97.7298	95.5052	100.53	100.217	106.83	99.526	107.149	104.687	103.386	102.425	98.5513	101.468	97.4678	107.594	114.271	96.2435	100.877	98.9679	87.4405	100.682	106.271	101.136	99.9944	96.9794	103.366	111.882	99.7529	107.131	106.547	111.608	99.2293	89.9978
98.6679	98.4985	106.665	95.5505	98.4022	102.493	100.235	97.9311	102.154	102.143	104.119	103.062	104.432	106.894	104.924	110.571	104.204	100.228	97.4508	94.9565	100.208	100.445	107.091	100.392	107.561	104.645	102.759	103.313	99.8726	100.632	97.9237	108.533	114.945	96.8664	100.978	98.7169	87.2369	100.621	105.677	101.292	99.7174	98.0014	104.207	112.214	100.741	107.564	106.297	112.669	99.5692	90.259
98.7129	98.3292	106.93	95.9452	99.0406	102.686	100.847	97.3893	100.196	101.437	104.284	102.637	102.9	106.059	104.28	110.609	104.35	100.173	98.3298	94.4108	99.9228	100.631	107.774	99.9182	107.33	105.141	102.43	102.878	99.5418	100.31	98.0019	108.217	115.374	96.5535	101.415	98.718	87.892	100.631	106.789	100.521	99.3038	97.7815	103.835	111.674	100.302	107.448	108.057	112.29	99.1095	91.463
[truncated: 245 more columns]

## Sheet: all
control		N=5		Y-27		N=3
100	5.68866e-15	493		100	4.91997e-15	292		0
100.108	1.33451			99.9625	0.904619			1
100.28	1.84939			99.975	1.37167			2
100.402	2.11458			100.05	1.80387			3
100.612	2.56529			100.005	2.26073			4
100.71	2.79123			100.081	2.62022			5
100.74	3.04087			100.115	2.87205			6
100.878	3.29814			100.165	3.11638			7
100.953	3.48913			100.217	3.28914			8
101.04	3.65266			100.27	3.48694			9
101.085	3.81111			100.286	3.63437			10
101.158	3.94464			100.308	3.81996			11
101.304	4.1753			100.388	4.0088			12
101.191	4.29481			100.369	4.13559			13
101.22	4.31142			100.371	4.25507			14
101.179	4.38666			100.4	4.37155			15
101.211	4.54679			100.379	4.52168			16
101.307	4.74565			100.348	4.60139			17
101.365	4.75463			100.328	4.65885			18
101.316	4.75898			100.378	4.73479			19
101.447	4.93033			100.363	4.7828			20
101.534	4.94202			100.399	4.81545			21
101.599	4.99561			100.394	4.83712			22
101.831	5.24347			100.49	4.94123			23
101.773	5.22136			100.507	5.04896			24
101.846	5.31067			100.587	5.0896			25
102.1	5.39673			100.567	5.13202			26
102.152	5.39628			100.681	5.17186			27
102.416	5.48612			100.767	5.32667			28
102.487	5.3706			100.789	5.32332			29
102.498	5.46517			100.825	5.35856			30
102.655	5.45826			101.054	5.44374			31
102.824	5.55159			101.062	5.48779			32
102.975	6.019			101.129	5.60439			33
103.151	5.83482			101.344	5.5149			34
103.343	6.326			101.438	5.5598			35
103.532	6.17255			101.461	5.50636			36
103.501	5.81503			101.483	5.57575			37
103.58	5.80959			101.788	5.6752			38
103.778	5.9794			101.839	5.65865			39
103.8	5.86871			101.907	5.7468			40
103.978	5.7409			102.115	5.85531			41
104.047	6.02164			102.22	5.8534			42
104.167	5.87034			102.295	5.90044			43
104.235	5.81022			102.372	5.96165			44
104.364	5.91366			102.635	6.05746			45
104.449	5.96878			102.625	6.03288			46
104.448	5.76315			102.647	6.08408			47
104.587	5.67791			103.027	6.17			48
104.797	5.85818			103.022	6.21868			49
104.958	5.80411			103.059	6.28112			50
104.56	5.357			103.32	6.32525			51
104.678	5.27047			103.293	6.31338			52
104.865	5.437			103.328	6.36091			53
104.897	5.5156			103.543	6.45484			54
104.901	5.73851			103.536	6.48291			55
104.921	5.91549			103.629	6.52945			56
105.113	5.75758			103.612	6.55315			57
105.226	5.62415			103.879	6.65595			58
105.265	5.41662			103.947	6.70476			59
105.418	5.34025			103.928	6.81143			60

## Sheet: absolute initial volume
control	20171218	1	1795.91		Y-27	20211005_1	1	2163.44
	20171218	2	1952.39			20211005_1	1	1948.78
	20171218	3	2364.8			20211005_1	1	2489.19
	20171218	4	1591.2			20211005_1	1	2297.64
	20171218	5	1527.46			20211005_1	1	1790.86
	20171218	6	2498.89			20211005_1	1	2657.06
	20171218	7	2065.64			20211005_1	1	2622.78
	20171218	8	1257.59			20211005_1	2	2247.6
	20171218	9	1152.28			20211005_1	2	1925.57
	20171218	10	1579.38			20211005_1	2	1994.68
	20171218	11	1521.93			20211005_1	2	1653.77
	20171218	12	3344.48			20211005_1	2	2093.04
	20171218	13	1352.41			20211005_1	2	2295.69
	20171218	14	1944.32			20211005_1	2	1822.61
	20171218	15	1354.71			20211005_1	2	2722.74
	20171218	16	1861.66			20211005_1	2	2897.02
	20171218	17	1496.42			20211005_1	2	2241.99
	20200806	1	2358.54			20211005_1	2	2149.88
	20200806	2	1737.79			20211005_1	2	2817.53
	20200806	3	1947.63			20211005_1	2	1952.23
	20200806	4	2186.71			20211005_1	3	2060.68
	20200806	5	1889.94			20211005_1	3	1822.67
	20200806	6	2216.56			20211005_1	3	2442.04
	20200806	7	2665.29			20211005_1	3	1833.51
	20200806	8	2583.22			20211005_1	3	1708.82
	20200806	9	2320.8			20211005_1	3	1789.69
	20200806	10	1937.48			20211005_1	3	2168.48
	20200806	11	1674.25			20211005_1	3	1507.54
	20200806	1	2021.79			20211005_1	3	2074.39
	20200806	2	1994.21			20211005_1	3	2063.71
	20200806	3	1922.54			20211005_1	3	2238.32
	20200806	5	2938.31			20211005_1	3	3028.33
	20200806	6	2346.44			20211005_1	3	1878.16
	20200806	7	2130.17			20211005_1	4	2628.32
	20200806	8	3116.31			20211005_1	4	2168.34
	20200806	9	1851.95			20211005_1	4	2308.81
	20200806	10	1917.46			20211005_1	4	2296.21
	20200806	11	2288.02			20211005_1	4	2152.59
	20200806	12	2203.07			20211005_1	4	1586.76
	20200806	13	2769.19			20211005_1	4	2723.97
	20200806	14	1852.45			20211005_1	4	2156.8
	20200806	15	1591.27			20211005_1	4	1646.57
	20200806	16	1800.09			20211005_1	4	1587.32
	20200806	17	1924.55			20211005_1	4	2911
	20200806	18	1995.05			20211005_1	4	2111.43
	20200806	19	2029.3			20211005_1	4	2508.31
	20200806	20	2032.4			20211005_1	5	1907.87
	20200806	1	1633.6			20211005_1	5	1270.9
	20200806	2	2437.84			20211005_1	5	2065.47
	20200806	3	1662.46			20211005_1	5	2401.85
	20200806	4	2369.52			20211005_1	5	3147.15
	20200806	5	1575.43			20211005_1	5	2239.57
	20200806	6	1638.42			20211005_1	5	2333.92
	20200806	7	3316.84			20211005_1	5	3263.4
	20200806	9	3008.97			20211005_1	5	1753.81
	20200806	10	1844.15			20211005_1	5	2004.62
	20200806	11	2534.93			20211005_1	6	2773.02
	20200806	12	2784.92			20211005_1	6	1700.11
	20200806	13	2237.89			20211005_1	6	1778.45
	20200806	14	1704.44			20211005_1	6	1775.5
	20200806	15	2297.53			20211005_1	6	1912.24
	20200806	16	2729.58			20211005_1	6	2139.86
	20200806	17	1754.39			20211005_1	6	2011.04
	20200806	18	1503.99			20211005_1	6	3275.87
	20200806	1	1891.42			20211005_1	6	2859.86
	20200806	2	2595.83			20211005_1	6	1632.22
	20200806	3	2100.72			20211005_1	6	1768.11
	20200806	4	2219.19			20211005_1	6	2279
	20200806	5	2096.5			20211005_1	6	3454.68
	20200806	6	1463.23			20211005_1	6	2906.81
	20200806	7	2024.96			20211005_1	6	3508.91
	20200806	8	2401.23			20211005_1	6	2363.38
	20200806	9	2190.74			20211005_1	6	2572.58
	20200806	10	1824.66			20211005_1	6	2293.9
	20200806	11	2665.25			20211005_1	6	2763.98
	20200806	12	2452.82			20211005_1	6	2539.1
	20200806	13	1348.74			20211005_1	6	2532.66
	20200806	14	2292.79			20211005_1	7	1673.89
	20200806	1	2028.92			20211005_1	7	2314.73
	20200806	2	2425.96			20211005_1	7	2851.48
	20200806	3	1862.16			20211005_1	7	2012.04
	20200806	4	1728.09			20211005_1	7	1702.95
	20200806	5	1518.15			20211005_1	7	1460.92
	20200806	6	1447.77			20211005_1	7	1776.36
	20200806	7	2181.51			20211005_1	7	2180.49
	20200806	8	2494.54			20211005_1	7	2716.9
	20200806	9	2027.21			20211005_1	7	2202.85
	20200806	11	1848.78			20211005_2	1	1917.8
	20200806	12	1585.23			20211005_2	1	2418.58
	20200806	1	2002.79			20211005_2	1	2958.48
	20200806	2	1680.97			20211005_2	1	2513.88
	20200806	3	2743.92			20211005_2	1	2354.14
	20200806	5	2072.68			20211005_2	1	1948.62
	20200806	6	1985.43			20211005_2	1	1633.48
	20200806	7	2504.94			20211005_2	1	2835.57
	20200806	8	1793.15			20211005_2	1	1237.55
	20200806	9	2228.05			20211005_2	1	2501.6
	20200806	11	2126.38			20211005_2	1	2087.39
	20200806	12	1949.63			20211005_2	1	1394.6
	20200806	13	1333.15			20211005_2	1	2041.55
	20200806	14	1619.19			20211005_2	2	2975.75
	20200806	15	1717.04			20211005_2	2	1497.98
	20200806	16	1828.76			20211005_2	2	1963.32
	20200806	17	1868.45			20211005_2	2	1950.42
	20200806	1	2442.79			20211005_2	2	2847.33
	20200806	2	1850.74			20211005_2	2	1533.4
	20200806	3	1994.56			20211005_2	2	2916.59
	20200806	4	2638.14			20211005_2	2	1796.38
	20200806	5	2772.95			20211005_2	2	1888.31
	20200806	6	2303.71			20211005_2	2	2236.74
	20200806	7	2326.41			20211005_2	2	1727.19
	20200806	8	1836.14			20211005_2	2	2345.44
	20200806	9	1864.38			20211005_2	2	2041.41
	20200806	10	2622.63			20211005_2	2	3695.91
	20200806	11	2161.14			20211005_2	2	1920.6
	20200806	12	1731.29			20211005_2	2	3564.21
	20200806	13	1789.91			20211005_2	2	3112.6
	20200806	14	2413.98			20211005_2	2	2403.69
	20200806	15	1788.83			20211005_2	2	2406.16
	20200806	17	1827.66			20211005_2	2	2193.11
	20200806	18	1963.41			20211005_2	3	2559.34
	20200806	19	1794.11			20211005_2	3	2190.84
	20200806	20	2805.76			20211005_2	3	1614.98
	20200806	22	2120.11			20211005_2	3	1995.97
	20200806	2	1479.45			20211005_2	3	1390.95
	20200806	3	1838.62			20211005_2	3	2440.29
	20200806	4	1831.17			20211005_2	3	2282.61
	20200806	5	2176.7			20211005_2	3	2325.14
	20200806	6	2122.19			20211005_2	3	1813.72
	20200806	7	2298.15			20211005_2	3	2350.3
	20200806	8	1546.85			20211005_2	3	1547.43
	20200806	9	1979.05			20211005_2	4	1540.77
	20200806	11	1737.32			20211005_2	4	2066.85
	20200806	12	1710.12			20211005_2	4	1639.48
	20200806	1	2112.01			20211005_2	4	1894.13
	20200806	2	1613.31			20211005_2	4	1860.45
	20200806	3	1902.63			20211005_2	4	1886.94
	20200806	4	2288.93			20211005_2	4	2269.35
	20200806	5	1884.14			20211005_2	4	2405.5
	20200806	6	1980.89			20211005_2	4	1885.6
	20200806	8	1862.15			20211005_2	4	1508.43
	20200806	9	1616.73			20211005_2	4	2784.26
	20200806	10	2143.08			20211005_2	4	2578.87
	20200806	11	1679.2			20211005_2	5	2456.95
	20200806	12	1952.94			20211005_2	5	1703.73
	20200806	1	1721.39			20211005_2	5	1663.32
	20200806	2	2198.95			20211005_2	5	1563.51
	20200806	3	1698.36			20211005_2	5	2256.3
	20200806	4	1828.33			20211005_2	5	1915.93
	20200806	5	1602.01			20211005_2	5	2336.93
	20200806	6	1972.98			20211005_2	5	2466.9
	20200806	8	1689.87			20211005_2	5	3043.78
	20200806	9	1718.07			20211005_2	5	2257.44
	20200806	10	1960.96			20211005_2	5	3282.14
	20200806	11	2171.94			20211005_2	5	1614.75
	20200806	12	2052.93			20211005_2	6	1921.79
	20211005	1	3571.67			20211005_2	6	2321.22
	20211005	1	2259.6			20211005_2	6	2578.34
	20211005	1	2221.53			20211005_2	6	2404.7
	20211005	1	3137.45			20211005_2	6	3661.31
	20211005	1	3118.5			20211005_2	6	1936.43
	20211005	1	2612.15			20211005_2	6	2048.49
	20211005	1	2302.59			20211005_2	6	2199.69
	20211005	1	2698.38			20211005_2	6	2848.12
	20211005	1	2374.64			20211005_2	7	2070.79
	20211005	1	2834.25			20211005_2	7	2163.8
	20211005	1	3256.65			20211005_2	7	1930.73
	20211005	1	2783.99			20211005_2	7	1567.39
	20211005	1	2242.96			20211005_2	7	2595.46
	20211005	1	2344.22			20211005_2	7	1824.93
	20211005	1	2149.6			20211005_2	7	1898.3
	20211005	1	2369.93			20211005_2	7	1882.32
	20211005	1	1911.41			20211005_2	7	1647.85
	20211005	1	2996.06			20211005_2	7	1558.2
	20211005	1	3577.48			20211005_2	7	1691.4
	20211005	1	2517.2			20211005_2	7	1343.73
	20211005	1	2286.45			20211005_2	7	1507.63
	20211005	1	3600.37			20190306	1	1665.78
	20211005	2	2522.23			20190306	1	1572.57
	20211005	2	2971.59			20190306	1	1440.61
	20211005	2	2133.63			20190306	1	1685.63
	20211005	2	3026.94			20190306	1	1178.09
	20211005	2	3111.91			20190306	1	1746.43
	20211005	2	2460.21			20190306	1	1897.48
	20211005	2	1666.65			20190306	2	2186.09
	20211005	2	1471.5			20190306	2	1707.04
	20211005	2	1236.87			20190306	2	1809.14
	20211005	3	1881.71			20190306	2	2417.31
	20211005	3	1841.98			20190306	2	2439.36
	20211005	3	2965.83			20190306	2	2656.14
	20211005	3	1727.94			20190306	2	2099
	20211005	3	2523.46			20190306	2	1378.63
	20211005	3	2358.35			20190306	2	1551.4
	20211005	3	2109.27			20190306	2	1258.02
	20211005	3	1828.05			20190306	2	2112.79
	20211005	3	2642.16			20190306	2	1357.28
	20211005	3	1925			20190306	2	1473.82
	20211005	3	2923.13			20190306	3	1862.33
	20211005	3	1877.67			20190306	3	1589.52
	20211005	3	1515.49			20190306	3	1828.85
	20211005	3	2908.48			20190306	3	1802.39
	20211005	3	2156.65			20190306	3	1972.89
	20211005	3	2150.83			20190306	3	1881.08
	20211005	3	3375.1			20190306	3	1574.9
	20211005	3	3871.37			20190306	3	2003.03
	20211005	3	1942.62			20190306	3	1707.86
	20211005	4	1473.99			20190306	3	2278.51
	20211005	4	3039.61			20190306	3	1910.15
	20211005	4	2554.38			20190306	3	2413.05
	20211005	4	2028.38			20190306	4	1995.58
	20211005	4	2213.01			20190306	4	1491.14
	20211005	4	3225.4			20190306	4	1851.26
	20211005	4	1976.69			20190306	4	1193.68
	20211005	4	2522.11			20190306	4	1086
	20211005	4	2736.14			20190306	4	1472.58
	20211005	4	2901.01			20190306	4	2026.15
	20211005	4	3380.47			20190306	4	1830.28
	20211005	4	2009.96			20190306	4	1874.49
	20211005	4	2643.58			20190306	4	1185.23
	20211005	4	2090.16			20190306	4	1682.93
	20211005	4	2643.87			20190306	4	1436.9
	20211005	4	2426.51			20190306	4	1784.02
	20211005	4	2881.23			20190306	4	1910.3
	20211005	4	2787.44			20190306	4	1852.06
	20211005	4	2430.7			20190306	4	2548.34
	20211005	4	2752.13			20190306	4	1361.53
	20211005	4	3025.61			20190306	4	1316.46
	20211005	4	2138.77			20190306	4	1569.17
	20211005	4	2950.37			20190306	4	1463.12
	20211005	4	2402.25			20190306	4	1070.83
	20211005	5	2974.08			20190306	4	2338.46
	20211005	5	2934.78			20190306	5	1510.62
	20211005	5	2703.73			20190306	5	1536.63
	20211005	5	1849.72			20190306	5	1951.33
	20211005	5	3190.33			20190306	5	1836.49
	20211005	5	3159.34			20190306	5	1726.31
	20211005	5	1645.03			20190306	5	1882.02
	20211005	5	1909.92			20190306	5	2264.73
	20211005	5	2166.34			20190306	5	2684.28
	20211005	5	2380.04			20190306	5	1102.07
	20211005	5	1833.8			20190306	5	2130.13
	20211005	5	1370.72			20190306	5	2130.75
	20211005	5	1789.42			20190306	5	2650.72
	20211005	5	2628.23			20190306	5	2470.76
	20211005	5	3290.66			20190306	6	1446.48
	20211005	5	2339.44			20190306	6	2135.25
	20211005	5	2446.46			20190306	6	1981.24
	20211005	5	3203.19			20190306	6	1194.04
	20211005	5	1459.21			20190306	6	2647.53
	20211005	6	2749.29			20190306	6	1805.15
	20211005	6	1487.2			20190306	6	1596.33
	20211005	6	2455.01			20190306	6	1611.81
	20211005	6	1639.84			20190306	6	2368.2
	20211005	6	2444.01			20190306	6	2153.57
	20211005	6	2465.61			20190306	6	1852.27
	20211005	6	1595.13			20190306	6	1589.86
	20211005	6	2382.25			20190306	6	1555.99
	20211005	6	2276.55			20190306	6	1902.46
	20211005	6	2434.53			20190306	6	1854.08
	20211005	6	2682.57			20190306	6	1747.95
	20211005	6	2226.17			20190306	6	1814.64
	20211005	6	1742.65			20190306	6	2169.87
	20211005	6	3522.49			20190306	6	1683.31
	20211005	6	1958.7			20190306	7	1741.22
	20211005	6	2263.65			20190306	7	1669.64
	20211005	6	3054.95			20190306	7	1710.91
	20211005	6	3343			20190306	7	1351.12
	20211005	6	2140.43			20190306	7	1514.22
	20211005	6	3201.41			20190306	7	1875.14
	20211005	6	2161			20190306	7	1515.17
	20180401	1	1579.04			20190306	7	1511.8
	20180401	2	1421.63			20190306	7	1827.34
	20180401	3	1531.82			20190306	7	1749.17
	20180401	4	1331.32			20190306	7	1779.63
	20180401	7	1362.79			20190306	7	1952.1
	20180401	8	1416.12			20190306	8	2017.67
	20180401	9	1327.97			20190306	8	2024.29
	20180401	10	1774.13			20190306	8	1709.06
	20180401	11	1890.39			20190306	8	1917.17
	20180401	1	1776.31			20190306	8	2028.87
	20180401	5	1578.32			20190306	8	1623.62
	20180401	1	1918.34			20190306	8	2081.61
	20180401	3	990.014			20190306	8	2362.72
	20180401	5	1662.16			20190306	8	1397.32
	20180401	7	4088.75			20190306	8	2535.31
	20180401	8	1649.95			20190306	8	1965.07
	20180401	9	1572.56			20190306	8	2227.77
	20180401	1	1887.55			20190306	8	2394.71
	20180401	2	1668.03			20190306	8	1737.82
	20180401	3	1762.94			20190306	8	2632.82
	20180401	4	2432.48			20190306	8	1714.1
	20180401	5	2354.21			20190306	8	1617.59
	20180401	6	1558.36
	20180401	7	1833.23
	20180401	10	2956.39
	20180401	4	1909.86
	20180401	5	1603.38
	20180401	1	2080.52
	20180401	2	1973.27
	20180401	3	1153.27
	20180401	4	1045.4
	20180401	5	1985.27
	20180401	13	1579.63
	20180401	14	1354.01
	20180401	15	1409.16
	20180401	1	2179.95
	20180401	5	1076.78
	20180401	7	1643.34
	20180401	9	1814.1
	20180401	1	1772.3
	20180401	2	1261.68
	20180401	4	2052.28
	20180401	5	1867.63
	20180401	6	1248.82
	20180401	7	1501.39
	20180401	3	1508.86
	20180401	4	1516.57
	20180401	5	1806.4
	20180401	6	1769.55
	20180401	7	1479.75
	20180401	8	1261.19
	20180401	9	1508.93
	20180401	10	1063.51
	20180401	11	1570.57
	20180401	12	1240.61
	20180401	13	2022.45
	20180401	1	2455.35
	20180401	2	1913.07
	20180401	3	1456.29
	20180401	4	2085.59
	20180401	5	1194.34
	20180401	6	1431.83
	20180401	7	2354.04
	20180401	8	1631.56
	20180401	9	1828.55
	20180401	1	1534.52
	20180401	2	1478.36
	20180401	3	1263.78
	20180401	4	1738.88
	20180401	5	1524.05
	20180401	6	1243.45
	20180401	7	1505.77
	20180401	8	1594.47
	20180401	10	1709.84
	20180401	11	1321.34
	20180401	12	1521.62
	20180401	14	1426.79
	20180401	15	1792.37
	20180401	16	1239.28
	20180401	2	2201.57
	20180401	3	2061.8
	20180401	4	1275
	20180401	9	1367.29
	20180401	10	1412.63
