# Supplementary material for: A mechano-osmotic feedback couples cell volume to the rate of cell deformation
Source: eLife journal article supplement (doi:10.7554/elife.72381), 2022-04-13
Supplement: supp [file average_A_V_derivatives.xlsx]

## Sheet: Sheet1
t (min)	A (µm2)	V (%)
0	30.7384	100
1	49.4132	99.6009
2	70.2702	99.3579
3	80.794	99.0472
4	98.3835	98.7091
5	111.59	98.3849
6	135.333	98.0412
7	153.692	97.7285
8	179.769	97.4043
9	192.514	97.057			dA/dt	dV/dt
10	209.968	96.7402		sliding window 10 min	17.9981	-0.32401
11	214.37	96.478			17.4873	-0.321111
12	252.121	96.2055			18.0418	-0.320348
13	247.42	95.914			17.6774	-0.315223
14	283.898	95.685			17.9346	-0.306147
15	263.813	95.4485			16.392	-0.295694
16	304.829	95.2258			15.9302	-0.283409
17	290.363	95.0515			14.3491	-0.269077
18	329.711	94.8421			14.1487	-0.254137
19	327.19	94.7072			13.6558	-0.236774
20	351.97	94.5803			13.6444	-0.219606
21	324.083	94.5065			11.8678	-0.200561
22	364.024	94.4123			11.1093	-0.17979
23	325.637	94.2559			9.30467	-0.16221
24	364.78	94.2293			8.35449	-0.144016
25	352.794	94.1922			7.78229	-0.124682
26	377.072	94.2143			6.59174	-0.103673
27	386.148	94.1706			7.02141	-0.0855771
28	408.994	94.1078			6.96118	-0.0702512
29	363.144	94.1712			5.88467	-0.0548837
30	409.357	94.2311			6.4673	-0.0380529
31	346.939	94.2603			4.8174	-0.0224882
32	433.641	94.2611			5.63312	-0.0080083
33	384.591	94.3698			5.4019	0.00850487
34	439.72	94.4497			5.39579	0.0205094
35	384.034	94.5233			3.95645	0.0326393
36	446.155	94.6032			4.51193	0.0437127
37	419.603	94.649			4.33601	0.0543336
38	444.317	94.7337			5.39193	0.0624701
39	438.563	94.8078			6.90361	0.0654289
40	457.526	94.8989			6.50751	0.0696212
41	425.927	95.0159			6.33784	0.0757864
42	459.53	95.1326			4.1403	0.0817141
43	421.671	95.1793			3.9275	0.0818781
44	459.649	95.2965			2.87432	0.0849539
45	445.757	95.4025			3.51439	0.0887794
46	458.806	95.421			1.65535	0.0887968
47	463.132	95.5486			2.70156	0.0908145
48	500.305	95.6722			3.83483	0.0923561
49	437.176	95.7767			2.71302	0.0939666
50	433.161	95.8529			1.15976	0.0935953
51	479.115
52	506.089
53	483.447
54	532.765
55	495.174
56	533.485
57	508.928
58	551.151
59	520.517
60	550.205
