# Supplementary material for: A mechano-osmotic feedback couples cell volume to the rate of cell deformation
Source: eLife journal article supplement (doi:10.7554/elife.72381), 2022-04-13
Supplement: supp [file average_volume.xlsx]

## Sheet: Sheet1
20% H2O	13					50% H2O	10					2% PEG400	15					7% PEG400	17																55	0
	V(%)	stdev					V(%)	stdev					V(%)	stdev					V(%)	stdev
	100	5.57396e-15	-19	1			100	4.61061e-15	-16	1			100	5.18907e-15	-99	1			100	3.44664e-15	-17	1													56	0.1
	99.9506	0.418453	-18	2			99.7905	0.477826	-15	2			100.02	0.399247	-98	2			100.033	0.319095	-16	2													57	0.2
	99.9579	0.527465	-17	3			99.9967	0.388292	-14	3			100.083	0.341825	-97	3			99.8571	0.398707	-15	3													58	0.3
	100.008	0.556264	-16	4			100.092	0.498865	-13	4			99.9352	0.25129	-96	4			99.9667	0.373107	-14	4													59	0.4
	99.9672	0.521986	-15	5			100.295	0.499145	-12	5			100.077	0.381894	-95	5			100.057	0.392746	-13	5													60	0.5
	100.2	0.475683	-14	6			100.308	0.598331	-11	6			100.048	0.285078	-94	6			99.9463	0.311078	-12	6													61	0.6
	100.041	0.36743	-13	7			100.368	0.526781	-10	7			100.087	0.386488	-93	7			100.075	0.350433	-11	7													62	0.7
	100.181	0.400615	-12	8			100.221	0.461848	-9	8			100.28	0.459437	-92	8			100.098	0.386783	-10	8													63	0.8
	99.8546	0.37875	-11	9			100.455	0.615271	-8	9			100.256	0.30418	-91	9			100.129	0.364246	-9	9													64	0.9
	99.974	0.421239	-10	10			100.56	0.450236	-7	10			100.373	0.464915	-90	10			100.203	0.387027	-8	10													65	1
	100.065	0.269176	-9	11			100.541	0.610973	-6	11			100.243	0.40913	-89	11			100.238	0.319367	-7	11													66	1.1
	100.131	0.32826	-8	12			100.457	0.690863	-5	12			100.358	0.34218	-88	12			100.074	0.249918	-6	12													67	1.2
	100.034	0.380859	-7	13			100.56	0.643705	-4	13			100.386	0.424366	-87	13			100.208	0.3106	-5	13													68	1.3
	100.175	0.358504	-6	14			100.664	0.573376	-3	14			100.276	0.277517	-86	14			100.104	0.400349	-4	14													69	1.4
	100.215	0.307019	-5	15			100.713	0.694602	-2	15			100.251	0.414685	-85	15			100.498	0.536199	-3	15													70	1.5
	100.497	0.865621	-4	16			100.91	0.639643	-1	16			100.244	0.359833	-84	16			100.45	0.409573	-2	16													71	1.6
			-3	17			101.051	0.636435	0	17			100.073	0.323313	-83	17					-1	17													72	1.7
			-2	18			101.098	0.594703	1	18			100.146	0.408704	-82	18					0	18													73	1.8
	101.877	1.18464	-1	19			101.25	0.751199	2	19			100.252	0.433337	-81	19					1	19													74	1.9
	101.665	0.661438	0	20			101.418	0.725142	3	20			100.406	0.437724	-80	20				0.554876	2	20													75	2
	101.428	0.883439	1	21			101.383	0.692868	4	21			100.626	0.594859	-79	21				0.407216	3	21													76	2.1
	101.647	1.00765	2	22			101.48	0.845743	5	22			100.87	1.40464	-78	22			100.689	0.474178	4	22													77	2.2
	101.38	1.11581	3	23			101.883	0.823332	6	23					-77	23			100.375	0.467545	5	23													78	2.3
	101.32	1.00217	4	24					7	24			101.106	1.33199	-76	24			100.849	0.451568	6	24													79	2.4
	102.061	0.097225	5	25			102.5	0.827615	8	25			100.99	0.575801	-75	25			100.897	0.398874	7	25													80	2.5
	101.394	0.577483	6	26					9	26			100.69	0.719162	-74	26			100.924	0.448738	8	26													81	2.6
	101.269	1.00045	7	27					10	27			100.588	0.552966	-73	27			100.932	0.54765	9	27													82	2.7
			8	28					11	28			100.524	0.603324	-72	28			100.986	0.439369	10	28													83	2.8
	101.529	0	9	29			104.861	0.58766	12	29			100.612	0.590458	-71	29			101.052	0.421261	11	29													84	2.9
	101.582	1.44598	10	30			104.042	0.623923	13	30			100.42	0.647751	-70	30			100.7	1.25052	12	30													85	3
	101.905	0.745815	11	31			103.819	1.14361	14	31			100.223	0.775965	-69	31			100.826	0.754902	13	31													86	3.1
	101.565	1.27238	12	32			102.703	1.05084	15	32			100.402	0.434325	-68	32			100.784	0.979505	14	32													87	3.2
			13	33			103.145	1.03837	16	33			100.335	0.687694	-67	33					15	33													88	3.3
	101.932	0.71717	14	34				22.9913	17	34					-66	34					16	34													89	3.4
			-20				103.418	1.44614	18	35					-65	35			100.653	0.610417	17	35													90	3.5
	101.98	0.820562	16	36			102.203	1.8553	19	36			101.548	1.96535	-64	36			100.682	0.649905	18	36													91	3.6
			17	37					20	37			100.535	0.532683	-63	37			101.112	0.553562	19	37													92	3.7
	101.865	0.93781	18	38			101.479	0.842264	21	38			101.265	0.624659	-62	38			101.217	0.444627	20	38													93	3.8
			19	39			103.723	0.805288	22	39			101.22	0.627485	-61	39			100.596	0.659592	21	39													94	3.9
	102.441	0.772964	20	40			103.748	0.788594	23	40			101.27	0.725552	-60	40			101.602	0.650706	22	40													95	4
	101.954	0.753469	21	41			103.698	0.852318	24	41			101.277	0.82098	-59	41			101.875	0.783622	23	41													96	4.1
	101.777	0.822753	22	42			103.672	0.675973	25	42			101.666	0.841475	-58	42			101.826	0.867217	24	42													97	4.2
	102.063	0.518266	23	43			103.77	0.830721	26	43			101.797	0.899077	-57	43			101.683	0.560489	25	43													98	4.3
			24	44			103.71	0.649124	27	44			101.575	0.776322	-56	44			101.708	0.735789	26	44													99	4.4
	101.72	1.45446	25	45			103.642	0.552621	28	45			101.656	0.854376	-55	45			101.615	0.474167	27	45													100	4.5
			26	46			103.741	0.615715	29	46			101.622	0.96431	-54	46			101.745	0.610072	28	46													101	4.6
	101.687	1.08955	27	47			103.707	0.606514	30	47			101.701	0.766898	-53	47			101.716	0.882604	29	47													102	4.7
	102.014	0.691253	28	48			103.816	0.647648	31	48			101.648	0.88248	-52	48			101.66	0.669426	30	48													103	4.8
	102.154	0.783875	29	49			103.696	0.530081	32	49			101.588	0.694005	-51	49			101.589	0.779883	31	49													104	4.9
	101.924	0.600249	30	50			103.715	0.649343	33	50			101.478	0.590635	-50	50			101.384	0.431821	32	50													105	5
	102.212	0.605874	31	51			103.877	0.651289	34	51			101.383	0.805297	-49	51			101.402	0.921397	33	51													106	5.1
	101.829	0.449743	32	52			103.699	0.685892	35	52			101.543	0.818496	-48	52			101.421	0.726308	34	52													107	5.2
	101.831	0.622156	33	53			104.087	1.18973	36	53			101.352	0.758194	-47	53					35	53													108	5.3
	102.272	0.509446	34	54					37	54			101.826	0.675471	-46	54					36	54													109	5.4
	102.048	0.855866	35	55					38	55					-45	55			101.584	0.616237	37	55													110	5.5
	102.204	0.639437	36	56			101.302	1.08363	39	56					-44	56			101.703	0.74042	38	56													111	5.6
	101.947	0.409855	37	57			102.494	0.788814	40	57					-43	57			101.59	1.01712	39	57													112	5.7
	101.889	0.631943	38	58			102.555	0.896871	41	58			101.601	0.367383	-42	58			101.543	0.771191	40	58													113	5.8
	102.095	0.555752	39	59				22.9111	42	59			101.76	1.00974	-41	59			101.588	0.802192	41	59													114	5.9
	102.114	0.544628	40	60			102.774	0.822138	43	60			101.452	0.959092	-40	60			101.78	0.955976	42	60													115	6
			41	61			102.925	1.14613	44	61			101.289	0.92829	-39	61			101.902	0.769119	43	61													116	6.1
	102.328	1.11572	42	62			102.747	0.614078	45	62			101.111	0.957969	-38	62			102.204	1.1619	44	62													117	6.2
	103	0.771923	43	63			102.766	1.0855	46	63			100.984	0.787134	-37	63			102.008	1.23895	45	63													118	6.3
			44	64			102.927	0.832208	47	64			101.208	0.878173	-36	64			102.012	1.18929	46	64													119	6.4
			45	65			103.046	0.992105	48	65			101.183	0.847345	-35	65			101.997	1.14891	47	65													120	6.5
	102.269	1.86346	46	66			103.347	1.28173	49	66			101.149	0.774942	-34	66			101.575	0.654572	48	66													121	6.6
			47	67			103.142	1.02876	50	67			101.156	0.84468	-33	67			101.436	0.81344	49	67													122	6.7
			48	68			102.997	0.722551	51	68			101.223	0.738737	-32	68			101.277	1.09816	50	68													123	6.8
	101.93	0.922779	49	69			103.015	0.846533	52	69			101.112	0.827957	-31	69			101.138	1.39797	51	69													124	6.9
			50	70			103.085	0.794425	53	70			101.202	0.820614	-30	70			100.64	0.907622	52	70													125	7
	103.296		51	71			103.169	0.7662	54	71			101.206	0.851758	-29	71			101.123	0.930426	53	71
	102.472	1.10281	52	72			103.056	1.02077	55	72			101.145	0.779014	-28	72			101.073	0.620355	54	72
	102.478	1.6037	53	73			103.459	1.68805	56	73			101.119	0.790893	-27	73			100.824	1.01016	55	73
	102.924	0.015126	54	74			103.113	1.06185	57	74			101.215	1.00092	-26	74			100.577	0.860143	56	74
	102.668	1.68913	55	75			103.67	1.57641	58	75			101.201	0.785929	-25	75			100.719	0.631271	57	75
	102.386	0.03656	56	76			103.674	1.35277	59	76			101.242	0.698835	-24	76			100.38	0.663014	58	76
			57	77			103.999	1.32507	60	77			101.198	0.778788	-23	77			100.335	0.529558	59	77
			58	78			104.252	2.38432	61	78			101.196	0.666422	-22	78			100.131	0.742994	60	78
	103.782	1.52659	59	79			104.7	1.88997	62	79			101.261	0.712015	-21	79			99.7653	1.28709	61	79
	103.316	1.72194	60	80			105.409	1.99868	63	80			101.109	0.711221	-20	80			99.8507	1.47184	62	80
	102.404	1.40893	61	81			106.435	2.12219	64	81			101.22	0.639967	-19	81			99.6183	1.8262	63	81
	103.585	3.01029	62	82			107.464	2.41536	65	82			101.114	0.76212	-18	82			99.2354	2.04667	64	82
	102.684	1.6248	63	83			108.724	2.39651	66	83			101.299	0.919415	-17	83			98.4048	2.05363	65	83
	103.424	1.74822	64	84			110.076	2.6664	67	84			101.273	0.787288	-16	84			98.1678	2.3866	66	84
	104.321	2.14302	65	85			111.581	2.73966	68	85			101.471	0.820201	-15	85			97.4329	2.43611	67	85
	104.819	1.73727	66	86			112.97	3.01053	69	86			101.245	0.658516	-14	86			96.4243	2.46458	68	86
			-20				114.464	3.35119	70	87			101.245	0.757194	-13	87			95.8471	2.46921	69	87
	106.295	1.35732	68	88			115.79	3.54146	71	88			101.251	0.815263	-12	88			94.965	2.73313	70	88
	106.858	1.25128	69	89			117.028	3.59494	72	89			101.282	0.729519	-11	89			94.445	2.65562	71	89
	107.289	1.58675	70	90			118.452	3.83523	73	90			101.223	0.698178	-10	90			93.638	2.85661	72	90
	108.83	4.12855	71	91			119.664	3.90314	74	91			101.152	0.847214	-9	91			92.6264	3.25084	73	91
			-20				120.805	4.16907	75	92			101.195	0.851932	-8	92			91.5018	3.55988	74	92
			-20				121.971	4.28159	76	93			101.208	0.796554	-7	93			90.4714	4.02444	75	93
	110.359	3.32124	74	94			123.02	4.34554	77	94			101.394	0.585617	-6	94			89.315	4.34631	76	94
	111.292	3.64533	75	95			123.909	4.61327	78	95			101.232	0.819071	-5	95			88.0152	4.58161	77	95
	111.647	3.27759	76	96			124.939	4.59905	79	96			101.225	0.746493	-4	96			86.7117	4.95041	78	96
	112.239	3.19218	77	97			125.974	4.74781	80	97			101.283	0.701176	-3	97			85.2758	4.97806	79	97
	112.752	3.23265	78	98			126.612	5.02212	81	98			101.126	0.902864	-2	98			84.111	4.84449	80	98
	112.897	3.05571	79	99			127.449	4.90336	82	99			101.228	1.05747	-1	99			82.3967	4.22597	81	99
	113.365	3.18469	80	100			128.366	5.03487	83	100			101.074	0.537232	0	100			81.8542	5.23812	82	100
	113.494	3.27943	81	101			129.143	5.00333	84	101			100.981	0.889973	1	101			81.2169	4.69041	83	101
	114.136	3.18249	82	102			129.872	5.1414	85	102			100.741	0.885325	2	102			79.8526	4.48683	84	102
	114.64	3.27762	83	103			130.527	5.23726	86	103			100.765	0.815033	3	103			76.8146	3.87157	85	103
	114.577	3.55033	84	104			131.066	5.18868	87	104			100.809	0.952297	4	104			75.9794	3.7719	86	104
	114.655	3.27769	85	105			131.789	5.39637	88	105			100.736	0.999604	5	105			75.3081	3.54329	87	105
	115.154	3.08875	86	106			132.439	5.23597	89	106			100.903	0.72515	6	106			74.3133	3.41815	88	106
	115.454	3.11787	87	107			133.12	5.38373	90	107			100.81	0.851707	7	107			73.7598	3.24843	89	107
	115.939	3.11708	88	108			133.564	5.15604	91	108			100.739	0.858775	8	108			73.165	3.01018	90	108
	115.875	3.27652	89	109			134.19	5.39114	92	109			100.795	0.875749	9	109			72.5735	3.09757	91	109
	115.973	3.68037	90	110			134.552	5.56801	93	110			100.749	0.883097	10	110			72.0164	3.07217	92	110
	116.756	3.27624	91	111			135.645	5.1871	94	111			100.787	0.887205	11	111			71.4633	3.00048	93	111
	116.33	3.6432	92	112			136.322	5.23661	95	112			100.811	0.738814	12	112			70.8724	3.18938	94	112
	117.113	3.62236	93	113			136.562	5.12183	96	113			100.729	0.921392	13	113			70.7315	2.71345	95	113
			-20				137.187	5.1974	97	114			100.694	0.88919	14	114			70.4363	2.68408	96	114
	117.234	3.35676	95	115			137.406	5.09452	98	115			100.68	0.80887	15	115			70.1099	2.71722	97	115
			-20				137.687	5.24949	99	116			100.677	0.862527	16	116			69.8594	2.53935	98	116
			-20				138.07	4.91422	100	117			100.757	0.868708	17	117			69.4992	2.43538	99	117
	117.396	3.11577	98	118			138.461	5.14804	101	118			100.764	0.837692	18	118			69.1954	2.30653	100	118
			-20				138.788	4.94471	102	119			100.631	0.872173	19	119			68.8943	2.37659	101	119
	117.49	3.05067	100	120			139.051	4.86385	103	120			100.696	0.871291	20	120			68.6976	2.53187	102	120
	117.692	3.05477	101	121			139.372	4.86207	104	121			100.769	0.833084	21	121			68.771	2.05531	103	121
			102	122			139.539	4.825	105	122			100.677	0.781693	22	122			68.3467	2.08162	104	122
	118.143	3.5573	103	123			139.776	4.77691	106	123			100.799	0.828455	23	123			68.229	2.27211	105	123
	118.003	2.72049	104	124			139.964	4.7998	107	124			100.678	0.850007	24	124			67.959	2.3311	106	124
			-20				140.269	4.76077	108	125			100.662	0.871811	25	125			67.8789	2.44713	107	125
			106	126			140.607	4.82659	109	126			100.778	0.893935	26	126			67.5534	3.14805	108	126
			107	127			140.608	4.5954	110	127			100.793	0.811837	27	127			67.6951	2.35872	109	127
			108	128			140.79	4.6459	111	128			100.652	0.742937	28	128			67.3833	3.00588	110	128
			109	129			140.777	4.58006	112	129			100.684	0.868305	29	129			67.6152	2.16533	111	129
	118.386	3.03191	110	130			141.067	4.56108	113	130			100.722	0.827311	30	130			67.339	3.10123	112	130
	118.445	3.31221	111	131			141.15	4.44306	114	131			100.53	0.885519	31	131			67.3674	2.25434	113	131
	118.54	3.0307	112	132			141.16	4.39007	115	132			100.627	0.856453	32	132			67.1013	3.14998	114	132
	118.511	2.90766	113	133			141.224	4.35332	116	133			100.69	0.845292	33	133			67.1321	2.92766	115	133
	118.584	2.86946	114	134			141.439	4.35677	117	134			100.605	0.854776	34	134			66.9113	3.08242	116	134
	118.42	2.89933	115	135			141.625	4.22758	118	135			100.563	0.784805	35	135			67.0777	2.19529	117	135
	118.442	2.74377	116	136			141.706	4.16936	119	136			100.477	0.929074	36	136			66.6299	3.40767	118	136
	118.707	2.85184	117	137			141.877	4.18853	120	137			100.653	0.660289	37	137			66.9813	2.50358	119	137
	118.54	2.81924	118	138			141.875	4.03729	121	138			100.834	0.591683	38	138			66.837	2.9881	120	138
	118.631	2.91795	119	139			142.002	4.14906	122	139			100.791	0.66315	39	139			66.7269	3.14452	121	139
	118.762	2.92597	120	140			142.029	4.14134	123	140			100.737	0.835386	40	140			66.7095	3.18847	122	140
	118.469	2.84896	121	141			142.28	4.16258	124	141			100.727	0.7242	41	141			66.6943	3.0873	123	141
	118.623	2.73606	122	142			142.146	4.00796	125	142			100.673	0.652369	42	142			66.6501	3.13522	124	142
	118.62	2.8126	123	143			142.017	3.95127	126	143			100.682	0.690108	43	143			66.654	3.18724	125	143
	118.541	2.96628	124	144			142.109	4.07376	127	144			100.631	0.922394	44	144			66.4923	3.1709	126	144
	118.433	2.61884	125	145			142.814	3.93158	128	145			100.597	0.750509	45	145			66.5677	3.15727	127	145
	118.664	2.53309	126	146			142.779	3.83035	129	146			100.361	0.676616	46	146			66.618	3.03836	128	146
	118.478	2.73866	127	147			142.573	3.96229	130	147			100.382	0.721912	47	147			66.4813	3.13286	129	147
	118.669	2.83099	128	148			142.552	3.99822	131	148			100.381	0.679504	48	148			66.6555	2.87344	130	148
	118.625	2.69874	129	149			142.648	3.95482	132	149			100.404	0.829901	49	149			66.5386	3.03451	131	149
	118.331	2.72368	130	150			142.956	3.88575	133	150			100.323	0.684067	50	150			66.5038	3.05386	132	150
	118.364	2.65919	131	151			142.836	3.86543	134	151			100.368	0.702395	51	151			66.6755	3.0374	133	151
	118.39	2.89739	132	152			142.929	3.84305	135	152			100.273	0.745744	52	152			66.5104	3.18664	134	152
	118.476	2.72216	133	153			142.874	3.80111	136	153			100.145	0.747729	53	153			66.5266	3.09291	135	153
	118.398	2.69734	134	154			142.82	3.81124	137	154			100.18	0.844836	54	154			66.5105	3.11744	136	154
	118.356	2.78844	135	155			143.031	3.76056	138	155			100.046	0.887133	55	155			66.2576	3.27798	137	155
	118.39	2.6758	136	156			143.161	3.71448	139	156			99.9269	0.710078	56	156			66.3509	3.0736	138	156
			137	157			143.211	3.59563	140	157			100.1	0.764059	57	157			66.4151	3.06514	139	157
	118.426	2.78191	138	158			143.174	3.68438	141	158			99.9114	0.845906	58	158			66.5866	3.03669	140	158
	118.19	2.89785	139	159			143.214	3.77256	142	159			99.8765	0.765976	59	159			66.488	3.13813	141	159
	118.33	2.62364	140	160			143.148	3.64231	143	160			99.7189	0.798645	60	160			66.4121	3.21844	142	160
	118.228	2.58681	141	161			143.214	3.62554	144	161			99.609	0.995559	61	161			66.4869	3.18971	143	161
			142	162			143.18	3.78183	145	162			99.6094	0.829793	62	162			66.5376	3.05819	144	162
			143	163			143.245	3.64438	146	163			99.5811	0.920385	63	163			66.5094	2.99126	145	163
	118.251	2.70243	144	164			143.159	3.6281	147	164			99.4953	0.918148	64	164			66.3748	3.1816	146	164
	118.143	2.7416	145	165			143.278	3.64963	148	165			99.2679	0.991157	65	165			66.3894	3.05036	147	165
	118.309	2.96237	146	166			143.312	3.53075	149	166			99.4055	1.03224	66	166			66.2955	3.25105	148	166
	118.491	2.79048	147	167			143.271	3.43936	150	167			99.2283	1.04633	67	167			66.4144	3.02817	149	167
	118.065	2.77251	148	168			143.429	3.59589	151	168			99.1107	1.07047	68	168			66.5217	3.0278	150	168
	118.175	2.7616	149	169			143.322	3.51657	152	169			99.0707	0.978636	69	169			66.5143	3.1759	151	169
	118.286	2.82196	150	170			143.487	3.51683	153	170			99.0604	1.09494	70	170			66.4615	3.11297	152	170
	118.159	2.73657	151	171			143.399	3.57341	154	171			98.7837	1.1834	71	171			66.5495	2.87546	153	171
	118.197	2.8576	152	172			143.361	3.53309	155	172			98.7838	1.04678	72	172			66.217	3.18746	154	172
	117.896	2.7085	153	173			143.439	3.58521	156	173			98.7462	1.10929	73	173			66.3446	3.18923	155	173
	117.841	2.69888	154	174			143.25	3.45283	157	174			98.6777	1.03541	74	174			66.3517	3.23385	156	174
	117.853	2.86006	155	175			143.476	3.5369	158	175			98.6571	1.19326	75	175			66.4659	3.12042	157	175
	117.687	3.08234	156	176			143.596	3.48066	159	176			98.3844	1.23252	76	176			66.3951	3.00474	158	176
	117.691	2.75828	157	177			143.37	3.57725	160	177			98.4498	1.21595	77	177			66.4964	3.19311	159	177
	117.701	3.02051	158	178			143.518	3.55952	161	178			98.2151	1.21331	78	178			66.7865	1.93636	160	178
	117.781	2.87824	159	179			143.622	3.58877	162	179			98.1166	1.08304	79	179			66.3999	3.15421	161	179
	117.842	2.89484	160	180			143.579	3.63819	163	180			98.0286	1.06592	80	180			66.2933	3.19459	162	180
	117.505	2.99706	161	181			143.581	3.7144	164	181			97.8425	1.23252	81	181			66.3189	3.26392	163	181
	117.563	2.87749	162	182			143.532	3.64835	165	182			97.8303	1.39105	82	182			66.3691	3.07615	164	182
	117.701	3.05759	163	183			143.722	3.74144	166	183			97.6039	1.16749	83	183			66.2946	3.14957	165	183
	117.644	2.9624	164	184			143.834	3.7066	167	184			97.6188	1.31607	84	184			66.2772	3.2481	166	184
	117.467	3.00843	165	185			143.818	3.81002	168	185			97.5724	1.2494	85	185			66.1874	3.18523	167	185
	117.289	3.11807	166	186			143.826	3.81757	169	186			97.3204	1.35544	86	186			66.2183	3.13634	168	186
	117.309	3.16546	167	187			143.919	3.81592	170	187			97.2777	1.28724	87	187			66.3738	3.30312	169	187
	117.327	2.96858	168	188			143.94	3.78262	171	188			97.1742	1.20584	88	188			66.4656	3.25305	170	188
	117.395	3.13278	169	189			143.946	3.9756	172	189			97.0928	1.15607	89	189			66.3577	3.15465	171	189
	117.232	3.27178	170	190			143.97	3.93568	173	190			96.9877	1.27146	90	190			66.3142	3.08882	172	190
	117.332	3.23363	171	191			144.124	3.82931	174	191			96.9904	1.26788	91	191			66.3418	3.29375	173	191
	117.13	3.19206	172	192			144.085	3.97061	175	192			96.8776	1.30818	92	192			66.4113	3.11621	174	192
	117.253	3.22306	173	193			144.079	3.99803	176	193			96.729	1.28863	93	193			65.9916	3.19961	175	193
	117.193	3.25303	174	194			144.15	4.07066	177	194			96.6622	1.24626	94	194			66.4523	3.25894	176	194
	117.105	3.22284	175	195			144.119	4.10625	178	195			96.562	1.30671	95	195			66.3742	3.26186	177	195
	117.005	3.24698	176	196			144.282	4.15354	179	196			96.5966	1.33703	96	196			66.3147	3.08465	178	196
	117.072	3.40657	177	197			144.181	4.09113	180	197			96.46	1.28747	97	197			66.4029	3.3511	179	197
	117.063	3.24883	178	198			144.401	4.12672	181	198			96.2907	1.24562	98	198			66.3845	3.16242	180	198
	117.042	3.5852	179	199			144.283	4.21408	182	199			96.1145	1.19119	99	199			66.5165	3.2155	181	199
	116.929	3.50592	180	200			144.431	4.21543	183	200			96.2076	1.16038	100	200			66.4407	3.12572	182	200
	116.909	3.24971	181	201			144.422	4.2862	184	201			95.7481	1.53607	101	201			66.3837	3.23945	183	201
	116.835	3.57007	182	202			144.509	4.40584	185	202			95.7836	1.47803	102	202			66.4951	3.40391	184	202
	116.937	3.46136	183	203			144.517	4.33653	186	203			95.6274	1.69267	103	203			66.505	3.28449	185	203
	116.997	3.53939	184	204			144.49	4.35023	187	204			95.6414	1.54065	104	204			66.47	3.35198	186	204
	117.004	3.57712	185	205			144.558	4.47811	188	205			95.5226	1.55796	105	205			66.2454	3.41793	187	205
	116.749	3.62794	186	206			144.595	4.48381	189	206			95.4863	1.54099	106	206			66.463	3.43113	188	206
	116.95	3.54943	187	207			144.656	4.5852	190	207			95.4074	1.46126	107	207			66.3674	3.48667	189	207
	117.061	3.7391	188	208			144.74	4.53827	191	208			95.3459	1.49914	108	208			66.3064	3.34114	190	208
	117.055	3.65729	189	209			144.721	4.60433	192	209			95.2608	1.52274	109	209			66.3287	3.44488	191	209
	116.7	3.75295	190	210			144.798	4.68647	193	210			95.2227	1.43858	110	210			66.357	3.46674	192	210
	116.705	3.54479	191	211			144.876	4.62427	194	211			95.1532	1.47754	111	211			66.353	3.47575	193	211
	116.678	3.56696	192	212			144.905	4.75733	195	212			94.9932	1.5512	112	212			66.3254	3.49352	194	212
	116.672	3.73304	193	213			144.891	4.93773	196	213			95.0109	1.41512	113	213			66.4871	3.42373	195	213
	116.496	3.55023	194	214			144.835	4.65089	197	214			94.8344	1.47766	114	214			66.4331	3.40423	196	214
	116.42	3.73919	195	215			144.856	4.86477	198	215			94.962	1.3916	115	215			66.3493	3.54711	197	215
	116.603	3.69447	196	216			144.982	4.92706	199	216			94.7057	1.48746	116	216			66.397	3.27014	198	216
	116.457	3.72093	197	217			144.959	4.92173	200	217			94.6257	1.46043	117	217			66.3914	3.47472	199	217
	116.512	3.82416	198	218			144.974	5.08368	201	218			94.6762	1.37215	118	218			66.3084	3.49076	200	218
	116.416	3.91403	199	219			145.078	4.87979	202	219			94.5231	1.43521	119	219			66.3542	3.56271	201	219
	116.438	3.84495	200	220			145.093	4.99316	203	220			94.4287	1.50026	120	220			66.3546	3.45166	202	220
	116.457	3.94898	201	221			145.099	5.02765	204	221			94.382	1.41373	121	221			66.4488	3.39185	203	221
	116.249	3.83188	202	222			145.025	5.08781	205	222			94.3991	1.3747	122	222			66.3325	3.58922	204	222
	116.217	3.77322	203	223			145.252	5.08844	206	223			94.2075	1.43396	123	223			66.3298	3.43647	205	223
	116.08	3.83262	204	224			145.14	5.08133	207	224			94.2044	1.46606	124	224			66.3721	3.55007	206	224
	116.14	3.80715	205	225			145.047	5.22221	208	225			94.1869	1.456	125	225			66.4051	3.43375	207	225
	116.112	4.11642	206	226			145.049	5.23027	209	226			94.151	1.33206	126	226			66.196	3.58014	208	226
	116.092	3.89999	207	227			145.069	5.40126	210	227			94.142	1.42967	127	227			66.3749	3.44897	209	227
	116.026	4.21194	208	228			145.206	5.21667	211	228			94.1613	1.24041	128	228			66.2728	3.57673	210	228
	116.102	4.25388	209	229			145.159	5.32785	212	229			94.028	1.30512	129	229			66.1442	3.61739	211	229
	116.1	4.00953	210	230			145.076	5.32187	213	230			94.0087	1.34022	130	230			66.3803	3.50116	212	230
	116.074	4.19148	211	231			145.141	5.26116	214	231			93.889	1.31953	131	231			66.4402	3.64136	213	231
	115.957	4.26404	212	232			145.228	5.39369	215	232			93.894	1.27859	132	232			66.4054	3.49807	214	232
	115.825	4.14024	213	233			145.154	5.49971	216	233			93.8243	1.36716	133	233			66.4128	3.27431	215	233
	115.833	4.24403	214	234			145.384	5.58008	217	234			93.7822	1.37469	134	234			66.3308	3.70259	216	234
	115.815	4.29244	215	235			145.217	5.57593	218	235			93.6035	1.32517	135	235			66.4082	3.29395	217	235
	115.805	4.27854	216	236			145.205	5.6587	219	236			93.7175	1.30223	136	236			66.424	3.61391	218	236
	115.675	4.34755	217	237			145.251	5.59794	220	237			93.6903	1.12943	137	237			66.5604	3.37051	219	237
	115.848	4.24855	218	238			145.177	5.61223	221	238			93.8556	0.959882	138	238			66.275	3.65841	220	238
	115.668	4.28678	219	239			145.378	5.79351	222	239			93.7334	1.06127	139	239			66.2212	3.57227	221	239
	115.732	4.26275	220	240			145.191	5.62345	223	240			93.621	1.03389	140	240			66.2392	3.7859	222	240
	115.68	4.41751	221	241			145.21	5.72178	224	241			93.6991	0.952608	141	241			66.1938	3.86116	223	241
	115.741	4.39913	222	242			145.331	5.73226	225	242			93.4671	1.03101	142	242			66.2785	3.54631	224	242
	115.615	4.28505	223	243			145.313	5.83858	226	243			93.6006	0.931429	143	243			66.5517	3.29425	225	243
	115.68	4.53882	224	244			145.224	5.91078	227	244			93.4336	1.02319	144	244			66.2013	3.62639	226	244
	115.551	4.47444	225	245			145.304	5.92712	228	245			93.515	1.0221	145	245			66.8202	3.61986	227	245
	115.672	4.56739	226	246			145.327	6.09143	229	246			93.3693	0.930175	146	246			66.5174	3.6606	228	246
	115.458	4.61325	227	247			145.275	5.85681	230	247			93.4983	1.04873	147	247			66.4003	3.76142	229	247
	115.621	4.56951	228	248			145.317	6.00648	231	248			93.4131	1.0322	148	248			66.3289	3.58434	230	248
	115.346	4.51479	229	249			145.345	5.95934	232	249			93.5225	1.04366	149	249			66.442	3.69888	231	249
	115.484	4.91341	230	250			145.298	6.06604	233	250			93.2765	1.07029	150	250			66.3194	3.58958	232	250
	115.34	4.72719	231	251			145.337	6.21324	234	251			93.3587	0.884715	151	251			66.3905	3.45884	233	251
	115.404	4.83013	232	252			145.235	6.14797	235	252			93.2714	0.945238	152	252			66.8781	3.53757	234	252
	115.182	4.65988	233	253			145.158	6.20927	236	253			93.1196	0.997648	153	253			66.8111	3.68326	235	253
	115.2	4.91957	234	254			145.246	6.14716	237	254			93.1804	1.01139	154	254			66.8123	3.53118	236	254
	115.054	4.89238	235	255			145.197	6.19807	238	255			93.1091	1.10332	155	255			66.9078	3.75664	237	255
	114.975	4.90844	236	256			145.294	6.21032	239	256			93.1115	1.05224	156	256			66.9301	3.59915	238	256
	115.134	4.9312	237	257			145.302	6.2841	240	257			93.1513	1.01197	157	257			66.9086	3.68214	239	257
	115.175	5.08125	238	258			145.21	6.28411	241	258			93.0622	0.981302	158	258			66.7256	3.41172	240	258
	114.738	5.18598	239	259			145.244	6.38457	242	259			92.9737	0.915838	159	259			66.8704	3.54499	241	259
	114.76	5.08835	240	260			145.209	6.36789	243	260			92.9507	1.01021	160	260			66.7944	3.61879	242	260
	114.773	4.9143	241	261			145.148	6.39892	244	261			92.9842	0.920091	161	261			67.0148	3.5395	243	261
	114.802	5.15279	242	262			145.165	6.34114	245	262			92.9593	0.931567	162	262			67.0534	3.38923	244	262
	114.792	5.41266	243	263			145.162	6.50754	246	263			93.0243	0.876582	163	263			66.9148	3.29737	245	263
	114.522	5.24138	244	264			145.112	6.36663	247	264			92.9162	0.963297	164	264			66.9445	3.56238	246	264
	114.611	5.34571	245	265			145.068	6.41715	248	265			92.8426	0.899014	165	265			67.0416	3.53735	247	265
	114.515	5.45555	246	266			145.092	6.56134	249	266			92.879	0.95952	166	266			67.2316	3.39966	248	266
	114.545	5.48093	247	267			145.135	6.4235	250	267			92.7478	0.901586	167	267			66.9216	3.55078	249	267
	114.58	5.55956	248	268			145.127	6.54674	251	268			92.7885	0.998244	168	268			67.2251	3.52035	250	268
	114.361	5.52953	249	269			145.178	6.66173	252	269			92.7139	1.01311	169	269			66.9925	3.51783	251	269
	114.474	5.46141	250	270			145.087	6.69648	253	270			92.6443	0.980445	170	270			66.9607	3.59211	252	270
	114.357	5.49391	251	271			144.978	6.50974	254	271			92.7044	0.889114	171	271			66.9736	3.56304	253	271
	114.415	5.41624	252	272			144.982	6.55763	255	272			92.7054	0.918585	172	272			67.1061	3.34367	254	272
	114.285	5.57229	253	273			145.087	6.49975	256	273			92.7119	0.876634	173	273			67.0553	3.52388	255	273
	114.188	5.4913	254	274			145.058	6.72378	257	274			92.7142	1.08945	174	274			67.0154	3.50467	256	274
	114.052	5.79263	255	275			144.982	6.7715	258	275			92.7094	0.949604	175	275			67.0652	3.48018	257	275
	114.336	5.69144	256	276			144.954	6.8291	259	276			92.6288	0.998057	176	276			66.9809	3.71277	258	276
	114.217	5.76723	257	277			144.924	6.69293	260	277			92.573	1.09038	177	277			67.1525	3.41887	259	277
	113.946	5.71106	258	278			144.974	6.82276	261	278			92.6068	0.90526	178	278			67.0936	3.48862	260	278
	114.027	5.87621	259	279			145.008	6.94175	262	279			92.593	0.985673	179	279			67.0441	3.35966	261	279
	114.149	5.84495	260	280			145.051	6.84659	263	280			92.4658	0.93803	180	280			67.0987	3.40063	262	280
	113.787	5.78681	261	281			144.945	6.82318	264	281			92.5835	1.00222	181	281			67.0287	3.57832	263	281
	113.827	5.85838	262	282			144.799	6.96404	265	282			92.5051	0.97677	182	282			67.0492	3.55367	264	282
	113.966	6.12483	263	283			144.854	6.88897	266	283			92.4214	0.977757	183	283			67.0523	3.45912	265	283
	113.712	5.86762	264	284			144.708	6.86314	267	284			92.5081	1.09523	184	284			67.1099	3.52433	266	284
	113.797	6.22025	265	285			144.777	6.83425	268	285			92.5094	1.02206	185	285			66.9191	3.73292	267	285
	113.91	6.11902	266	286			144.845	7.0721	269	286			92.5734	0.930922	186	286			67.0619	3.66446	268	286
	113.923	6.12652	267	287			144.71	7.05693	270	287			92.5709	1.08374	187	287			67.0236	3.52086	269	287
	113.558	6.26526	268	288			144.68	7.14442	271	288			92.3733	0.998315	188	288			67.1191	3.78474	270	288
	113.609	6.10435	269	289			144.717	7.20149	272	289			92.4094	1.01805	189	289			66.8723	3.65337	271	289
	113.436	6.16013	270	290			144.657	6.98133	273	290			92.338	1.0019	190	290			66.9261	3.90347	272	290
	113.434	6.19879	271	291			144.792	7.14962	274	291			92.3667	1.07909	191	291			67.1205	3.70092	273	291
	113.34	6.29391	272	292			144.586	7.10152	275	292			92.3988	1.06163	192	292			67.0779	3.59067	274	292
	113.488	6.26647	273	293			144.817	7.15147	276	293			92.3262	1.01833	193	293			67.2146	3.45579	275	293
	113.288	6.16536	274	294			144.433	7.17267	277	294			92.4021	1.17721	194	294			67.0671	3.50126	276	294
	113.246	6.38001	275	295			144.48	7.16531	278	295			92.391	0.987307	195	295			66.9965	3.67787	277	295
	113.221	6.5273	276	296			144.467	7.1962	279	296			92.4595	1.00744	196	296			67.3775	3.63528	278	296
	113.266	6.40407	277	297			144.383	7.25543	280	297			92.3541	0.939646	197	297			67.0721	3.42676	279	297
	113.136	6.30693	278	298			144.537	7.2765	281	298			92.4266	1.04158	198	298			67.0669	3.57779	280	298
	113.035	6.36485	279	299			144.487	7.27784	282	299			92.2779	1.03699	199	299			67.1958	3.55651	281	299
	113.028	6.50776	280	300			144.251	7.2992	283	300			92.2691	0.953605	200	300			66.8884	3.69221	282	300
	113.16	6.60384	281	301			144.386	7.30676	284	301			92.2876	0.963317	201	301
	112.928	6.53748	282	302			144.333	7.23342	285	302			92.2827	1.10459	202	302
	112.871	6.66691	283	303			144.292	7.31277	286	303			92.3467	1.12229	203	303
	112.932	6.62758	284	304			144.235	7.39097	287	304			92.2453	1.19452	204	304
	112.889	6.56134	285	305			144.167	7.46068	288	305			92.4053	1.04453	205	305
	112.86	6.77539	286	306			144.239	7.341	289	306			92.2481	1.0393	206	306
	112.694	6.68648	287	307			144.144	7.32389	290	307
	112.557	6.88055	288	308			144.269	7.54112	291	308
	112.573	6.81708	289	309			144.264	7.39799	292	309
	112.664	6.75618	290	310			144.114	7.38606	293	310
	112.597	6.78688	291	311			144.11	7.35354	294	311
	112.627	6.879	292	312			144.114	7.45234	295	312
	112.493	6.79018	293	313			144.07	7.53538	296	313
	112.456	6.94056	294	314			144.033	7.52549	297	314
	112.573	6.94678	295	315			143.963	7.36176	298	315
	112.492	7.09987	296	316			143.958	7.54298	299	316
	112.336	7.06873	297	317			143.837	7.6363	300	317
	112.267	6.80874	298	318			143.97	7.50799	301	318
	112.306	7.17414	299	319			143.794	7.51376	302	319
	112.341	7.08564	300	320			143.871	7.60792	303	320
	112.143	7.01358	301	321			143.858	7.67624	304	321
	112.094	7.19776	302	322			143.74	7.64121	305	322
	112.058	7.11443	303	323			143.672	7.53163	306	323
	112.091	7.10859	304	324			143.783	7.61298	307	324
	111.839	7.2487	305	325			143.575	7.67962	308	325
	112.048	7.28363	306	326			143.547	7.6194	309	326
	111.736	7.30709	307	327			143.6	7.76733	310	327
	111.763	7.10422	308	328			143.523	7.67293	311	328
	111.878	7.36075	309	329			143.474	7.76451	312	329
	111.849	7.2396	310	330			143.41	7.76792	313	330
	111.358	7.30357	311	331			143.484	7.68759	314	331
	111.668	7.21209	312	332			143.405	7.7809	315	332
	111.673	7.16596	313	333			143.395	7.89162	316	333
	111.54	7.22873	314	334			143.528	7.80214	317	334
	111.479	7.16004	315	335			143.347	7.80654	318	335
	111.57	7.44146	316	336			143.377	7.88588	319	336
	111.211	7.327	317	337			143.378	7.97733	320	337
	111.413	7.244	318	338			143.216	7.89609	321	338
	111.144	7.51794	319	339			143.229	7.89842	322	339
	111.157	7.36647	320	340			143.133	8.01986	323	340
	111.268	7.42666	321	341			143.15	7.95134	324	341
	111.213	7.29378	322	342			143.036	7.94156	325	342
	110.984	7.48936	323	343			143.216	8.17897	326	343
	111.122	7.50671	324	344			143.029	8.05686	327	344
	111.029	7.42161	325	345			142.98	8.00151	328	345
	111.028	7.54566	326	346			142.959	7.95976	329	346
	111.061	7.47779	327	347			142.964	8.00372	330	347
	110.926	7.5909	328	348			143.001	8.12785	331	348
	111.22	7.40001	329	349			142.951	7.91746	332	349
	110.989	7.58151	330	350			142.821	8.05841	333	350
	111	7.58793	331	351			142.934	7.96806	334	351
	110.831	7.50073	332	352			142.8	7.97265	335	352
	111.003	7.47454	333	353			142.659	8.0667	336	353
	110.966	7.57676	334	354			142.713	8.12298	337	354
	110.844	7.56968	335	355			142.704	8.24642	338	355
	110.854	7.47467	336	356			142.674	7.95752	339	356
	110.594	7.48551	337	357			142.677	7.94258	340	357
	110.724	7.63847	338	358			142.722	8.03553	341	358
	110.816	7.58621	339	359			142.568	8.1458	342	359
	110.684	7.62248	340	360			142.64	8.07769	343	360
	110.48	7.61328	341	361			142.51	8.20005	344	361
	110.507	7.46496	342	362			142.434	8.21871	345	362
	110.612	7.54845	343	363			142.598	8.1988	346	363
	110.516	7.66709	344	364			142.463	8.17502	347	364
	110.533	7.67344	345	365			142.433	8.24467	348	365
	110.397	7.75738	346	366			142.44	8.22436	349	366
	110.39	7.65975	347	367			142.371	8.15353	350	367
	110.275	7.73141	348	368			142.333	8.35038	351	368
	110.207	7.68243	349	369			142.338	8.27064	352	369
	110.298	7.65362	350	370			142.351	8.31286	353	370
	110.401	7.72368	351	371			142.283	8.13848	354	371
	110.279	7.79097	352	372			142.142	8.22158	355	372
	110.131	7.72203	353	373			142.229	8.31479	356	373
	109.963	7.68392	354	374			142.236	8.25672	357	374
	110.198	7.85951	355	375			142.084	8.26458	358	375
	110.114	7.85686	356	376			142.071	8.40814	359	376
	110.233	7.89708	357	377			142.067	8.39501	360	377
	110.167	7.96276	358	378			142.048	8.41391	361	378
	110.09	7.84521	359	379			142.117	8.37238	362	379
	109.981	7.69012	360	380			142.064	8.40012	363	380
	110.082	7.91855	361	381			142.026	8.27227	364	381
	109.925	7.95859	362	382			142.059	8.33153	365	382
	109.836	7.90924	363	383			141.905	8.32326	366	383
	109.951	7.83933	364	384			141.947	8.35137	367	384
	109.864	7.88882	365	385			141.857	8.45062	368	385
	109.825	7.88118	366	386			141.836	8.43738	369	386
	109.693	7.92912	367	387			141.931	8.44018	370	387
	109.717	7.87908	368	388			141.725	8.54067	371	388
	109.599	7.9091	369	389			141.98	8.39186	372	389
							141.774	8.27287	373	390
							141.773	8.42521	374	391
							141.775	8.45457	375	392
							141.698	8.55231	376	393
							141.703	8.46136	377	394
							141.66	8.56037	378	395
							141.652	8.54324	379	396
							141.605	8.47711	380	397
							141.603	8.59509	381	398
							141.641	8.58863	382	399
							141.648	8.47213	383	400
							141.478	8.45405	384	401
							141.555	8.74658	385	402
							141.442	8.50369	386	403
							141.509	8.58084	387	404
							141.384	8.55848	388	405
							141.432	8.61852	389	406
							141.274	8.63322	390	407
							141.288	8.60815	391	408
							141.369	8.48653	392	409
							141.238	8.59009	393	410
							141.307	8.75592	394	411
							141.182	8.64512	395	412
							141.241	8.69509	396	413
							141.211	8.62683	397	414
							141.104	8.58308	398	415
							140.999	8.62182	399	416
							140.915	8.63947	400	417
							141.099	8.64879	401	418
							141.09	8.77206	402	419
