# Supplementary material for: A mechano-osmotic feedback couples cell volume to the rate of cell deformation
Source: eLife journal article supplement (doi:10.7554/elife.72381), 2022-04-13
Supplement: supp [file average_volume.xlsx]

## Sheet: Sheet1
t (min)			average V (%)	stdev			average V (%)	stdev			average V (%)	stdev			average V (%)	stdev			average V (%)	stdev
0		iso	100	6.2927e-15		10% H2O	100	6.8645e-15		50% H2O	100	3.4466e-15		2% PEG400	100	6.545e-15		5% PEG400	100	5.7581e-15
0.5			100.089	0.7613			99.9039	0.6866			99.8627	0.7293			100.152	0.6234			100.113	0.654
1			100.275	0.933			99.753	0.4533			99.8074	0.7735			100.079	0.8314			100.072	0.9033
1.5			100.283	1.1317			99.6378	0.7496			99.6967	0.8464			100.356	1.1118			100.122	0.9368
2			100.348	1.422			99.5416	1.064			99.8398	0.8594			100.305	1.1797			100.08	1.1058
2.5			100.376	1.5563			99.6811	1.0372			99.7653	1.2468			100.377	1.4769			100.098	1.1479
3			100.482	1.6033			99.6703	1.4073			99.8642	1.4991			100.55	1.6576			99.9967	1.296
3.5			100.558	1.8919			99.6736	1.3701			100.011	1.6062			100.732	1.876			100.067	1.3573
4			100.309	2.0169			99.6179	1.5433			100.019	1.7476			100.707	1.8238			100.155	1.5704
4.5			100.498	2.2071			99.7852	1.5555			100.004	2.0476			100.633	2.0255			100.141	1.57
5			101.653	3.0308			111.269	3.0026			167.191	11.6334			85.9817	2.7532			70.2866	3.8071
5.5			102.124	3.124			110.692	3.2454			161.455	12.6655			86.8111	2.8564			71.4564	3.75
6			102.555	3.3366			109.715	3.4994			155.461	12.4296			87.5145	2.8955			72.6827	3.5964
6.5			102.714	3.4204			108.624	3.7677			151.121	12.1296			88.3728	3.1535			73.9995	3.6277
7			102.796	3.5674			108.132	4.2661			145.288	12.2646			89.2225	3.149			75.1936	3.4509
7.5			102.893	3.6062			107.641	4.4287			141.269	12.8973			89.9397	3.2001			76.3833	3.4975
8			102.887	3.6226			107.087	4.7793			137.165	13.9402			90.568	3.3518			77.4811	3.524
8.5			102.997	3.6945			106.86	5.0492			133.888	14.131			91.4062	3.3422			78.5102	3.4689
9			102.941	3.8845			106.613	4.9218			131.135	14.0418			92.0664	3.4426			79.4519	3.3821
9.5			102.894	4.0944			106.375	5.1253			129.258	13.8134			92.7373	3.5498			80.4724	3.4161
10			103.048	4.1187			106.183	5.2475			126.928	13.8102			93.3637	3.7748			81.4221	3.3171
10.5			102.967	4.2112			106.186	5.4926			125.647	13.6178			93.7603	3.9384			82.2602	3.3642
11			102.916	4.3397			106.142	5.5417			124.713	13.5135			94.4798	3.8056			83.0501	3.3277
11.5			102.972	4.5845			105.945	5.536			123.335	13.2431			94.9931	3.7458			83.7894	3.3234
12			102.907	4.4961			105.729	5.7143			122.796	12.9002			95.1321	3.9031			84.631	3.3358
12.5			102.841	4.5952			105.638	5.7991			122.235	12.846			95.8337	3.9467			85.4025	3.3483
13			102.79	4.7684			105.62	5.6832			121.42	13.4833			96.2782	3.9849			85.9426	3.3288
13.5			102.849	4.9197			105.506	5.8037			120.984	14.0054			96.6457	4.0107			86.5248	3.3709
14			102.781	4.9947			105.412	5.8982			120.91	14.669			97.0562	3.9592			87.2624	3.2296
14.5			102.781	5.0562			105.467	5.8358			120.672	14.6087			97.2583	3.8963			87.8964	3.3216
15			102.707	5.0695			105.366	5.9648			120.924	14.9565			97.5674	3.921			88.401	3.3502
15.5			102.736	5.234			105.15	6.0723			121.046	14.8509			97.9435	3.9034			88.9968	3.3642
16			102.719	5.2841			105.196	5.9187			121.055	15.052			98.1462	3.9963			89.6915	3.3713
16.5			102.566	5.2817			104.915	5.8959			121.42	15.0878			98.3458	3.9649			90.1398	3.3874
17			102.689	5.4173			105.124	6.0608			121.721	15.6867			98.6999	4.1224			90.5003	3.404
17.5			102.56	5.4664			104.906	6.0487			121.753	15.0527			98.8764	4.0081			91.113	3.3762
18			102.491	5.4961			105.022	6.2833			121.943	15.3752			99.083	4.1193			91.6498	3.3972
18.5			102.522	5.5			104.897	6.1054			122.152	15.3137			99.1977	3.891			92.0818	3.3844
19			102.453	5.5776			104.919	6.1483			122.494	15.5733			99.3912	4.1429			92.5313	3.3908
19.5			102.399	5.5354			104.883	6.2085			122.561	15.6737			99.5414	4.0992			92.9225	3.4665
20			102.499	5.7015			104.851	6.3341			122.507	15.6401			99.6758	4.0989			93.3024	3.5214
20.5			102.425	5.6372			104.945	6.408			123.046	15.5529			99.8122	4.0346			93.7031	3.5134
21			102.395	5.7241			104.869	6.5197			122.991	15.7499			100.071	4.1455			94.1682	3.4975
21.5			102.4	5.7949			104.874	6.5421			123.09	15.6753			99.9828	4.0343			94.4967	3.5683
22			102.453	5.7393			105.159	6.5066			123.255	15.6116			100.173	4.1429			94.997	3.6086
22.5			102.273	5.7619			104.986	6.6546			123.203	15.6623			100.407	4.2793			95.2783	3.5995
23			102.372	5.7283			105.001	6.8636			123.104	15.8297			100.412	4.1725			95.7601	3.5981
23.5			102.415	5.8472			105.192	6.8013			123.652	15.8079			100.468	4.4425			95.9418	3.5953
24			102.308	5.8318			105.088	6.8554			123.467	15.6306			100.604	4.4233			96.4094	3.6996
24.5			102.472	5.8387			105.273	6.8725			123.828	15.9589			100.637	4.4923			96.8682	3.7103
25			102.562	5.8596			105.33	7.0487			124.051	15.9961			100.922	4.5463			97.0468	3.7598
25.5			102.571	5.8782			105.358	7.127			123.871	16.1587			101.015	4.4465			97.4605	3.6581
26			102.539	6.1027			105.52	7.3501			124.363	16.1967			100.779	4.5752			97.8377	3.7808
26.5			102.554	6.0991			105.663	7.241			124.326	16.2306			101.029	4.3324			97.9726	3.781
27			102.527	6.0955			105.924	7.4203			124.436	16.2474			101.094	4.5619			98.2808	3.6735
27.5			102.698	6.1138			105.926	7.5497			124.884	16.2241			101.083	4.6496			98.5681	3.7464
28			102.616	6.1632			106.089	7.7783			124.866	16.1995			101.236	4.7834			98.953	3.628
28.5			102.68	6.2566			106.209	7.8347			125.29	16.1189			101.097	4.8039			99.1971	3.6929
29			102.573	6.251			106.272	7.958			125.05	16.12			101.308	4.7917			99.329	3.6904
29.5			102.617	6.2801			106.459	7.9568			125.27	15.8825			101.371	4.7665			99.6439	3.7435
30			102.831	6.3402			106.416	8.1556			125.388	15.9237			101.378	4.9745			99.9359	3.7342
30.5			102.843	6.4225			106.779	8.3007			125.85	15.8783			101.403	4.8275			100.172	3.7871
31			102.793	6.4602			106.816	8.2211			125.362	15.8673			101.375	5.0254			100.317	3.7604
31.5			102.857	6.2329			106.75	8.3079			125.581	15.7505			101.629	5.0049			100.743	3.7026
32			102.94	6.3476			106.885	8.3866			126.008	15.125			101.588	5.2037			100.963	3.6976
32.5			103.012	6.408			107.104	8.5476			126.287	14.8522			101.496	5.2051			101.147	3.6728
33			103.193	6.3741			107.175	8.7032			126.741	14.4933			101.644	5.1777			101.382	3.712
33.5			103.213	6.3032			107.27	8.9087			126.827	14.0977			101.668	5.1344			101.62	3.6638
34			103.261	6.3305			107.457	8.7946			127.392	13.7298			101.676	5.0902			101.834	3.7391
34.5			103.333	6.3956			107.518	8.9091			127.441	13.2197			101.77	5.3175			102.062	3.7847
35			103.409	6.482			107.71	8.8434			127.544	13.0961			101.72	5.1495			102.224	3.7171
35.5			103.494	6.3464			107.847	8.7841			127.915	12.9089			101.901	5.1442			102.453	3.8089
36			103.553	6.48			108.095	8.8051			128.241	12.8013			101.888	5.179			102.68	3.8417
36.5			103.653	6.4589			108.334	8.6406			128.531	12.3246			101.823	5.3506			102.909	3.7838
37			103.779	6.453			108.698	8.9291			128.268	12.0414			101.865	5.2628			103.182	3.728
37.5			103.762	6.5798			108.847	8.9759			128.982	11.5829			102.165	5.1848			103.314	3.8981
38			103.709	6.4485			109.022	8.8313			129.249	11.4329			102.06	5.3808			103.413	3.8573
38.5			103.916	6.4296			109.027	8.8311			128.939	11.6701			102.151	5.2855			103.653	3.8352
39			103.815	6.3761			109.224	8.7977			129.155	11.166			102.198	5.4529			103.779	3.8443
39.5			103.878	6.4695			109.52	8.8771			129.582	10.7862			102.358	5.4677			103.981	3.8702
40			103.905	6.4361			109.977	9.1324			129.533	10.8667			102.41	5.3455			104.32	3.8189
40.5			103.84	6.4204			110.231	9.1687			129.806	10.8917			102.387	5.4977			104.333	3.8455
41			103.941	6.4351			110.256	9.2036			129.894	10.7566			102.537	5.4834			104.546	3.7747
41.5			104.097	6.4739			110.78	9.3326			130.037	10.2176			102.33	5.4854			104.581	3.6903
42			104.094	6.536			111.052	9.3536			129.755	10.3632			102.601	5.599			104.897	3.8204
42.5			104.056	6.5099			111.157	9.7307			130.142	10.2275			102.536	5.6408			104.969	3.8172
43			104.174	6.5087			111.262	9.6128			130.234	10.1318			102.79	5.4285			105.115	3.8417
43.5			104.326	6.5151			111.584	9.8499			130.5	10.0185			102.665	5.6834			105.383	3.8839
44			104.329	6.361			111.761	9.6807			130.475	10.3946			102.673	5.5995			105.661	3.9658
44.5			104.279	6.4065			111.988	9.8618			130.881	10.1784			102.884	5.6558			105.73	3.8997
45			104.511	6.3282			112.202	9.9671			130.615	9.8575			102.769	5.5941			105.9	3.862
45.5			104.382	6.3097			112.584	9.9819			130.625	10.0272			102.815	5.7282			106.191	3.9297
46			104.408	6.3582			112.533	9.9132			130.852	9.7427			102.862	5.8455			106.32	3.9667
46.5			104.635	6.4633			112.686	10.0931			130.837	9.8299			103.022	5.7586			106.418	4.0853
47			104.712	6.373			112.92	10.0104			130.987	9.8131			103.033	5.819			106.616	4.0344
47.5			104.944	6.3006			113.123	10.2638			130.818	9.8508			103.12	5.8273			106.899	4.0767
48			104.921	6.2354			113.466	10.1663			131.138	9.6091			103.279	5.7029			106.966	4.1382
48.5			104.984	6.258			113.678	10.0176			131.514	9.6603			103.23	5.7296			107.114	4.0585
49			105.16	6.1507			114.13	9.9125			131.428	9.7102			103.406	5.8374			107.301	4.0303
49.5			105.176	6.1053			114.046	9.7631			130.976	9.7421			103.475	5.8128			107.427	4.0108
50			105.258	6.1763			114.393	9.974			131.384	9.4318			103.657	5.7344			107.63	4.0463
50.5			105.257	6.171			114.557	9.8838			131.39	9.5634			103.57	5.8569			107.85	4.0995
51			105.44	6.2292			114.714	9.8253			131.49	9.199			103.577	5.7483			107.967	4.2583
51.5			105.508	6.0832			114.814	9.8207			131.622	9.2851			103.727	5.6679			108.097	4.0992
52			105.544	6.1018			114.947	9.8582			131.614	9.3032			103.832	5.5856			108.161	4.2176
52.5			105.752	6.2636			115.098	9.7428			131.484	9.1764			103.91	5.8074			108.464	4.2292
53			105.671	6.1408			115.178	9.7437			131.45	9.0801			104.129	5.9566			108.667	4.2594
53.5			105.736	6.0917			115.478	9.5507			131.656	9.3588			104.129	5.895			108.711	4.3654
54			105.786	6.0468			115.811	9.4701			132.004	9.475			104.326	5.7913			108.845	4.2547
54.5			105.79	6.1532			115.945	9.357			132.254	9.2537			104.31	6.0441			109.017	4.322
55			105.837	6.0867			116.23	9.5562			132.321	9.4226			104.553	5.8679			109.141	4.3098
55.5			105.747	6.0562			116.374	9.4403			132.35	9.501			104.438	5.8728			109.259	4.3737
56			105.935	6.0574			116.629	9.451			132.34	9.5712			104.612	6.0081			109.476	4.3771
56.5			105.872	6.0296			116.749	9.2086			132.575	9.1098			104.601	5.8131			109.631	4.4317
57			106.005	6.1059			116.735	9.2065			132.484	9.3464			104.785	5.8921			109.684	4.3123
57.5			106.044	6.2283			116.763	9.2247			132.344	9.4203			104.872	5.7262			109.842	4.3437
58			105.991	6.2066			117.073	9.3095			132.572	9.5385			105.073	5.8125			109.998	4.3591
58.5			106.068	6.0737			117.25	8.8541			132.354	9.3274			105.055	5.876			110.343	4.5627
59			106.331	6.1303			117.694	8.9094			132.725	9.4356			105.025	5.6921			110.294	4.4557
59.5			106.256	6.1983			117.617	8.557			133.008	9.3141			105.325	5.8665			110.561	4.4466
60			106.219	6.1229			117.933	8.3356			132.79	8.9188			105.534	5.874			110.64	4.3547
