# Supplementary material for: A mechano-osmotic feedback couples cell volume to the rate of cell deformation
Source: eLife journal article supplement (doi:10.7554/elife.72381), 2022-04-13
Supplement: supp [file bulk_modulus.xlsx]

## Sheet: Sheet1
control	initial osmolarity (mOsm)	shock (mOsm)	delta V (%)	V1/V0	p0/p1	n	stdev V1	stdev V1/V0	dP (Pa)	dP (kPa)	B (kPa)	dV/V	stdev
20181102, c
hypo, 50%	346	177	61.1218	1.61122	1.9548	107	13.693	0.13693	421317	421.317	689.307	0.611218	0.13693
hyper, 10%	346	916	-45.9508	0.540492	0.377729	62	6.51477	0.0651477	-1.42101e+06	-1421.01	3092.46	-0.459508	0.0651477
20181126, hypo
10% H2O	344	311	12.3812	1.12381	1.10611	30	3.00259	0.0300259	82269	82.269	664.468	0.123812	0.0300259
30% H2O	354	247	31.1503	1.3115	1.4332	25	6.73766	0.0673766	266751	266.751	856.336	0.311503	0.0673766
40% H2O	351	227	41.6953	1.41695	1.54626	18	6.89306	0.0689306	309132	309.132	741.408	0.416953	0.0689306
50% H2O	360	180	67.1874	1.67187	2	17	11.6334	0.116334	448740	448.74	667.893	0.671874	0.116334
20181206, hypo
10% H2O	348	314	10.0019	1.10002	1.10828	80	3.66228	0.0366228	84762	84.762	847.456	0.100019	0.0366228
30% H2O	359	281	21.7642	1.21764	1.27758	47	6.1847	0.061847	194454	194.454	893.459	0.217642	0.061847
50% H2O	358	187	62.0465	1.62047	1.91444	18	11.5157	0.115157	426303	426.303	687.07	0.620465	0.115157
20181218, hyper
1% PEG400	340	392	-9.66702	0.90333	0.867347	34	3.15536	0.0315536	-129636	-129.636	1341.01	-0.0966702	0.0315536
2% PEG400	355	431	-14.6517	0.853483	0.823666	33	2.75323	0.0275323	-189468	-189.468	1293.15	-0.146517	0.0275323
5% PEG400	347	575	-29.8549	0.701451	0.603478	67	3.80713	0.0380713	-568404	-568.404	1903.89	-0.298549	0.0380713
20190208, hypo 20%	345	275	23.8309	1.23831	1.25455	17	4.12133	0.0412133	174510	174.51	732.283	0.238309	0.0412133
20190210, hypo 10%	346	305	7.87141	1.07871	1.13443	15	1.94488	0.0194488	102213	102.213	1298.53	0.0787141	0.0194488
20190328, hypo
20% H2O	341	276	14.939	1.14939	1.23551	142	4.11022	0.0411022	162045	162.045	1084.71	0.14939	0.0411022
40% H2O	343	214	31.4945	1.31495	1.6028	69	7.40226	0.0740226	321597	321.597	1021.12	0.314945	0.0740226
Lat A
20181102, lat
hypo, 50%	346	177	70.4915	1.70492	1.9548	41	13.9983	0.139983	421317	421.317	597.685	0.704915	0.139983
hyper, 10%	346	916	-49.0752	0.509248	0.377729	31	4.87515	0.0487515	-1.42101e+06	-1421.01	2895.58	-0.490752	0.0487515
20190306, lat
hypo, 10%	383	354	13.097	1.13097	1.08192	66	4.05482	0.0405482	72297	72.297	552.011	0.13097	0.0405482
hypo, 30%	388	285	31.3571	1.31357	1.3614	27	7.6927	0.076927	256779	256.779	818.886	0.313571	0.076927
20190306, lat 10% (hypo10then20)	388	348	7.77778	1.07778	1.11494	63	7.77778	0.0777778	99720	99.72	1282.11	0.0777778	0.0777778
