# Supplementary material for: A mechano-osmotic feedback couples cell volume to the rate of cell deformation
Source: eLife journal article supplement (doi:10.7554/elife.72381), 2022-04-13
Supplement: supp [file c_e_d40_20.xlsx]

## Sheet: Sheet1
p	c	c_st	e	e_st
0.61	-0.927738	5.21393	4.3473	10.1457
0.72	1.74621	6.88691	3.69539	5.28349
1.05	2.73231	3.44396	5.29303	4.5598
1.28	2.71885	3.08867	9.38072	7.17552
1.61	6.45133	1.72846	8.89515	3.88879
1.63	9.69384	2.13508	9.52352	4.24298
