# Supplementary material for: A mechano-osmotic feedback couples cell volume to the rate of cell deformation
Source: eLife journal article supplement (doi:10.7554/elife.72381), 2022-04-13
Supplement: supp [file CK666_dVdt_dAdt.xlsx]

## Sheet: Sheet1
exp	pos	cell	Vi	t of V loss	deltaV% at t of V loss	A at t of V loss	t of 90	deltaV% at t of 90	deltaS% at t of 90	A at 90	dV/dt i	dA/dt i
20181030_1	3	2	2657.57	20	6.57356	17.161					-7.91157	0.996039
20181030_1	3	3	1834.38	35	15.4362	557.577	14	5.7664	4.74037	193.14	-8.77484	14.9482
20181030_1	3	9	1524.59	23	12.5189	132.192	27	10.9291	2.81285	181.595	-13.2134	7.85406
20181030_1	5	3	1301.61	41	7.82123	149.665	36	6.58946	3.73186	149.353	-1.88615	9.3402
20181030_1	5	4	1870.95	30	16.8957	514.727	8	5.85651	13.2818	271.872	-17.7012	30.0302
20181030_1	5	7	1870.05				40	-3.25004	9.37101	185.651	7.87677	4.03297
20181030_1	5	8	1775.3	32	8.55504	92.15					-2.80159	4.6763
20181030_1	5	13	1332.08	18	11.3427	40.146					-5.25487	2.56987
20181030_1	7	1	1714.11	18	8.95229	38.482					-11.1917	3.58539
20181030_1	7	3	1400.52	5	2.66953	22.569					-0.518059	4.0529
20181030_1	7	5	2214.21	28	4.05863	194.7	40	3.58543	8.10549	242.439	-3.7605	7.47997
20181030_1	7	17	1211.71	27	4.70632	67.916					-2.47432	3.43033
20181030_1	8	2	1526.93	13	6.36349	86.949	42	-0.238618	13.2494	212.901	-9.80082	6.26088
20181030_1	8	4	1418.36	20	9.52909	481.549	6	0.112226	14.2109	211.029	-8.71686	39.7597
20181030_1	9	1	1712.86	23	5.00855	82.373					-1.26241	6.2432
20181030_1	9	2	2731.05	23	6.48536	481.081	12	1.45117	9.50306	280.505	-3.22662	16.823
20181030_1	9	11	1838.72	12	8.33521	167.762	20	6.21742	4.74197	196.364	-15.5507	10.0192
20181030_1	10	6	1403.4	61	6.96601	251.071	29	4.40587	3.53629	141.969	-3.82785	3.47872
20181030_1	10	9	1599.57	40	13.1344	284.873	27	10.6161	4.31212	198.548	-9.1893	5.88044
20181030_1	11	5	1783.55	45	7.80127	383.939	12	-0.361981	15.5885	254.815	1.38814	7.65987
20181030_1	11	7	1768.36	13	2.61995	378.166	10	2.18947	26.2778	334.172	-4.11365	29.1272
20181030_1	11	9	2556.54	29	10.9113	729.084	9	0.436409	12.069	291.426	-13.3741	39.9343
20181030_2	3	13	1865.4	15	5.02173	59.596					-6.90028	2.54941
20181030_2	4	2	1797.71	60	10.341	242.647	50	9.02433	6.05809	221.637	-9.44003	2.36058
20181030_2	4	4	1111.15				15	-5.11701	11.192	137.08	3.9246	9.98598
20181030_2	6	4	1639.29	43	9.92452	729.084	7	6.1924	13.9432	254.711	-10.3795	27.5474
20181030_2	6	9	1570.4	35	7.03705	146.025	40	6.652	4.78466	179.619	-4.19904	4.74237
20181030_2	7	5	1617.49	47	10.0391	331.936	13	2.45409	7.13423	181.283	-4.88218	10.2767
20181030_2	7	6	1837.8	7	2.28562	47.011					3.10032	0.740863
20181030_2	8	4	1623.53	37	13.292	479.365	12	5.61042	4.74248	177.123	-8.07143	11.8203
20181030_2	8	6	1403.69				12	-4.04928	12.8342	180.763	4.07607	14.1177
20181030_2	8	7	1625.68	23	6.05195	64.276					-4.26488	4.06096
20181030_2	10.1	1	1884.43	33	4.20517	630.902	5	0.403109	9.20835	209.677	-2.46265	35.6604
20181030_2	10.1	2	1052.11	20	11.4256	354.037	4	-1.31484	9.86211	139.472	-10.0653	27.3206
20181030_2	10.3	3	1241.08				12	-11.489	15.381	151.121	12.1644	11.9118
20181030_2	11	7	1164.19	28	4.09853	399.8	8	-0.906376	7.99723	135.832	-0.663873	17.7223
20181030_2	11	7	1155.41	13	2.24639	66.564					-2.7127	4.72624
20200609	1	3	2691.97	20	4.27914	436.306	10	1.28873	6.67005	237.758	-4.15328	16.9729
20200609	1	4	2768.14	32	6.61299	480.197	9	-0.347184	7.93723	246.287	2.57181	16.355
20200609	1	5	2312.61				15	-1.29049	9.88927	236.302	2.42534	13.7729
20200609	1	6	3038.87	21	13.6036	772.142	5	1.99169	6.15907	256.479	-34.9292	48.1619
20200609	1	7	1789.73	21	4.54597	266.984	15	-4.32255	15.849	239.11	11.0548	7.50952
20200609	2	2	1955.66	17	6.22069	247.119	14	4.64186	6.84377	216.749	-9.17176	9.97061
20200609	2	3	3248.15	12	3.01997	191.787	20	2.37666	11.2656	345.925	-8.58255	8.14836
20200609	2	6	3057.29				15	-3.48095	15.7329	346.133	11.4558	11.9399
20200609	2	7	2216.29	41	10.5631	374.527	20	4.58586	7.306	240.358	-5.84286	10.298
20200609	2	8	2483.9				58	-12.12	14.5901	222.365	8.94958	2.3768
20200609	3	4	2843.43	19	8.14486	758.726	9	4.00291	14.4473	360.902	-14.9993	35.5251
20200609	3	5	2507.76	50	10.374	328.139	40	8.62433	5.9086	272.496	-8.34523	4.15696
20200609	3	6	2388.87				30	-6.12801	34.4279	439.01	12.0214	4.34212
20200609	3	8	2982.77	21	10.1169	520.967	14	-2.20253	24.3714	437.866	7.89167	13.7171
20200609	3	9	2506.42	23	8.22722	254.295	20	7.24893	5.15538	254.295	17.9695	7.93253
20200609	3	11	2775.71				16	-5.7683	18.8317	344.989	17.9936	12.371
20200609	3	12	2769.29	20	4.39407	344.469	20	4.39407	13.2232	344.469	14.7092	6.12743
