# Supplementary material for: A mechano-osmotic feedback couples cell volume to the rate of cell deformation
Source: eLife journal article supplement (doi:10.7554/elife.72381), 2022-04-13
Supplement: supp [file CK666_Y27_dVdt_dAdt.xlsx]

## Sheet: Sheet1
exp	pos	cell	Vi	t of V loss	deltaV% at t of V loss	A at t of V loss	t of 90	deltaV% at t of 90	deltaS% at t of 90	A at 90	dV/dt i	dA/dt i
20190306	1.1	1	2502.34	11	2.76526	192.1	14	2.76032	20.3422	377.023	-4.56313	20.4898
20190306	2.1	2	1574.54	4	0.992294	29.642	9	0.934888	12.9773	220.389	1.17476	42.581
20190306	2.1	3	2194.84	22	4.28401	225.278	17	3.02984	5.92621	211.653	-4.73508	34.8815
20190306	2.1	4	1997.28				7	-2.06737	28.5832	364.23	3.52809	70.5024
20190306	3.1	4	1535.73	37	3.96706	469.068	17	2.34213	18.1257	257.415	-2.9579	10.9799
20190306	3.1	7	1040.07	20	3.67731	601.26	8	-2.91436	18.8664	188.043	-4.88086	51.8551
20190306	3.2	1	1901.48	36	4.50197	734.129	12	-2.38152	19.1054	285.289	3.8178	32.1316
20190306	3.2	2	1935.74	26	9.0619	520.031	9	4.82394	10.3117	248.991	-8.80993	28.9908
20190306	3.2	6	1533.13	40	15.9688	518.367	6	4.61929	5.3364	170.362	-11.9251	26.8907
20190306	4.1	1	1239.85	22	3.54085	528.456	10	-2.34339	26.6079	254.815	2.73343	24.3486
20190306	4.1	4	1728.25	28	6.84829	870.636	8	0.526636	11.3477	218.621	-2.72166	22.6286
20190306	5.1	3	1608.35	30	9.27722	795.752	7	1.05287	12.4454	219.869	-4.68492	28.2872
20190306	5.1	7	2042.3	15	2.88654	519.823	6	0.174822	15.7576	282.897	-6.14875	63.379
20190306	5.2	1	2612.41	45	11.2423	1517.03	10	-2.57163	10.767	257.831	6.21118	25.2058
20190306	6.1	4	2267.46	42	11.2212	621.437	16	5.37157	8.98311	266.672	-7.16003	13.4844
20190306	7.1	1	2339.65	32	6.75835	683.009	12	0.284909	14.1919	295.378	-5.95084	48.958
20190306	8.1	1	1511.61				14	-6.57126	17.4998	216.645	9.48003	4.3735
20190306	8.1	2	1104.92	28	3.66546	806.152	4	-1.49643	15.1865	179.099	0.308853	26.8583
20190306	8.1	6	2005.47	42	12.6013	1018.12	8	4.1977	7.40652	223.509	-9.4634	31.9139
20190306	9.1	1	2120.46	9	6.167	655.031	4	2.61933	15.283	297.458	-14.218	65.4742
20190306	9.1	2	2310.65	21	13.3244	857.012	6	2.19826	19.2748	346.757	-20.5359	46.1008
20190306	9.1	6	1375	22	1.96894	448.891	9	-2.88589	15.5785	204.476	4.11576	21.6914
20190306	9.1	8	1741.84	16	8.77783	511.399	4	2.01113	11.768	230.79	-12.2857	40.7101
20190306	10.1	2	1138.73	46	13.9056	453.363	8	-0.187557	9.34177	148.209	-1.52081	24.8488
20190328_2	1	1	1836.95	21	3.56715	441.507	6	0.673008	10.0434	216.125	-2.51828	27.3734
20190328_2	1	4	1759.03	17	8.14117	500.114	4	3.26699	7.04813	195.844	-8.73671	39.3628
20190328_2	1	5	2431.54	20	10.1602	601.364	7	4.66797	5.41366	233.078	-18.1387	31.7102
20190328_2	2	1	1871.95	43	4.49036	544.369	13	-2.38933	9.27186	190.851	4.42293	9.93445
20190328_2	2	2	1996.46	23	6.73953	585.504	7	2.01334	13.3046	266.464	-6.19175	31.5659
20190328_2	2	4	2417.23	11	4.37993	476.557	6	2.55523	13.2944	305.57	-10.2725	43.176
20190328_2	3	1	1356.08				5	0.53024	11.9006	190.123	1.13734	27.486
20190328_2	3	2	1845.4	24	6.39167	454.715	6	1.85253	7.19976	194.7	-4.82423	20.2196
20190328_2	3	4	1939.25	26	2.02274	803.76	6	-0.581267	12.2097	238.174	2.50539	29.573
20190328_2	3	5	3680.51	20	3.93702	680.097	5	-0.265887	12.6297	373.798	2.74337	47.7396
20190328_2	4	1	2941.19				12	-0.119787	10.3877	294.13	1.47702	8.17715
20190328_2	4	2	2804.89	28	6.41744	1058.26	6	1.44816	14.1626	340.1	-4.51711	44.7769
20190328_2	4	3	1865.18				15	-7.29867	30.893	346.757	10.0583	10.6261
20190328_2	5	1	2350.37								37.1328	2.87766
20190328_2	5	2	1940.45	26	6.27982	546.449	8	1.83812	10.1323	231.83	-5.7714	28.2637
20190328_2	5	7	1436.27	16	4.31599	403.232	2	0.94128	6.80116	155.593	-4.59441	26.5037
20190328_2	6	1	1952.39				12	-1.58306	17.5762	281.545	1.78672	8.09515
20190328_2	6	4	2459.08	30	1.95872	672.608	9	-3.46912	14.5156	286.225	5.91725	37.8351
20190328_2	7	1	2941.39	18	3.01481	506.303	4	-1.52082	10.5693	285.185	-0.870565	31.3866
20190328_2	7	2	1824.48	20	7.81721	682.646	4	2.71456	17.0631	282.585	-12.9385	52.9629
20190328_2	7	3	1644.89	27	7.22608	425.334	6	1.60137	14.764	243.375	-3.78619	22.3413
20190328_2	7	4	2757.02				10	0.530661	6.33123	228.918	-1.169	10.6643
20190328_2	8	1	1449.19				8	1.64554	7.05536	163.186	-1.87056	13.9807
20190328_2	8	2	1361.86	12	6.75998	527.468	3	1.34207	9.98876	179.723	-8.35498	40.5158
20190328_2	8	3	1815.6	23	1.83982	236.302	17	0.290823	10.9337	220.805	0.730407	4.41162
20190328_2	9	5	1852.53				14	-0.408068	15.6043	261.264	2.29671	11.847
20190328_2	9	6	2197.32				15	1.40023	6.16581	201.876	-4.53693	21.9885
20190328_2	9	7	1583.5	10	4.49948	387.423	5	2.72905	10.9027	213.005	-6.51957	43.1592
20190328_2	9	8	1929	40	2.4709	449.827	20	1.89541	12.3588	251.695	-2.00279	7.95757
20190328_2	9	11	1840.12				15	1.24725	8.77216	207.076	-2.48856	8.90052
20190328_2	10	5	1069.13				4	1.02021	12.0523	164.954	-0.961028	21.2227
20190328_2	11	1	1510.6	9	2.02465	132.296	12	2.01072	6.35884	163.082	-2.80798	8.60085
20190328_2	11	8	1716.96				10	1.08553	14.1847	243.791	-1.57192	15.6979
20190328_2	11	13	1236.97				6	-1.28046	14.5932	190.019	0.221263	28.111
20190328_2	12	5	1322.72	26	11.7294	338.124	4	1.3434	12.7671	196.364	-8.75938	18.3843
20200609	1	4	1992.02	25	7.69376	366.518	5	1.81339	7.0716	203.124	-6.17294	20.8413
20200609	1	5	2866.15	25	7.77953	660.492	5	4.09066	5.67561	258.768	-7.57359	26.956
20200609	1	6	1013.64				10	-4.40855	10.0788	123.455	4.95295	8.11749
20200609	2	3	1875.81	25	4.02159	429.649	11	0.182735	13.6523	249.823	0.396144	18.1526
20200609	2	6	2648.59				14	-6.80736	18.37	323.147	16.8062	13.175
20200609	2	8	1275.43				11	-9.35626	18.7283	191.059	12.9158	13.4892
20200609	4	3	2871.81	25	13.2206	390.18	8	4.18282	6.89956	277.073	-19.3761	25.7171
20200609	5	4	2723.02	19	11.3542	590.235	9	7.28763	6.69204	287.785	-17.1871	31.7947
20200609	5	10	1812.83				10	-1.8325	14.2386	239.422	1.3139	23.4755
20200609	6	2	1590.56	8	3.40431	199.588	7	2.92856	9.08588	199.588	-4.38302	24.057
20200609	6	3	3256.64	42	5.45158	732.412	10	-0.021865	8.4212	285.705	1.16738	18.9819
20200609	6	5	2229.72	22	11.4978	553.313	7	3.26213	11.3282	274.785	-13.9148	27.5146
20200609	7	4	3517.02	16	7.28265	412.177	17	6.98813	12.494	412.177	-21.5225	16.4248
20200609	9	1	3041.75	22	12.1963	575.363	9	1.63595	6.50242	258.664	-7.86705	22.0122
20200609	9	3	1947.09	19	3.91738	401.464	7	-2.04729	11.443	222.573	5.09793	25.4003
