# Supplementary material for: A mechano-osmotic feedback couples cell volume to the rate of cell deformation
Source: eLife journal article supplement (doi:10.7554/elife.72381), 2022-04-13
Supplement: supp [file confinement_Volume.xlsx]

## Sheet: Sheet1
experiment	condition	h	V	stdev	n	% of 20 µm control in this experiment	stdev		experiment	condition	h	V	stdev	n	% of 20 µm control in this experiment	stdev		experiment	condition	h	V	stdev	n	% of 20 µm control in this experiment	stdev		experiment	condition	h	V	stdev	n	% of 20 µm control in this experiment	stdev
20170219 hela embl 20x confinement with 2um lat 22 7.3 5.1	control	22	2165.73	610.161	113	100	28.1735		20170219 hela embl 20x confinement with 2um lat 22 7.3 5.1	Lat A 2 µM	22	2352.24	783.454	70	108.612	36.1751		20170924 hela embl confinement 20.5 9.4 5.3 lata 5uM wo incubation_1	Lat A 5 µM	20	2100.23	573.13	191	95.2217	25.985		20211005_1	Y-27	20.5	1781.44	511.447	305	101.995	29.2827
20171011 hela embl confinement 20.5 14.9 9.4 7.8 5.3 3.1 ricm	control	20.5	2012.24	606.234	66	100	30.1274		20170924 hela embl confinement 20.5 9.4 5.3 lata 2uM wo incubation_1	Lat A 2 µM	20	2139.43	541.94	106	88.2483	22.3543		20170928 hela embl confinement 20.5 9.4 5.3 lata 5uM 30 min incubation_1	Lat A 5 µM	20	2078.89	463.243	138	97.905	21.8164		20211005_3	Y-27	20.5	1976.66	607.301	198	92.4426	28.4017
20170601 hela embl confinement lata2uM	control	20.5	2127.34	495.655	198	100	23.2993		20170924 hela embl confinement 20.5 9.4 5.3 lata 2uM wo incubation	Lat A 2 µM	20	2345.93	675.574	250	104.186	30.0032		20170830 hela embl confinement lata5um ricm wo incubation	Lat A 5 µM	19.8	2156.05	898.776	77	101.027	42.1143		20211026_1	Y-27	19.8	1703.17	155	155	100.829	9.17609
20211005_1	control	20.5	1746.58	458.757	413	100	26.2659		20170928 hela embl confinement 20.5 9.4 5.3 lata 2uM 30 min incubation	Lat A 2 µM	20	2064.11	459.164	112	94.8801	21.1062		20170924 hela embl confinement 20.5 9.4 5.3 lata 5uM wo incubation	Lat A 5 µM	17.44	2022.9	608.57	253	89.516	26.9301		20211026_2	Y-27	19.8	1611.48	137	137	89.3983	7.6002
20211005_3	control	20.5	2138.26	584.594	420	100	27.3397		20170928 hela embl confinement 20.5 9.4 5.3 lata 2uM 30 min incubation_1	Lat A 2 µM	20	2395.22	682.557	86	100.723	28.7026		20170803 20X_HeLa lata 5uM and RICM for control, without incubation	Lat A 5 µM	12.9	2102.51	600.454	87	96.8276	27.6529		20211026_4	Y-27	19.8	1737.65	233	233	104.991	14.0782
20170310 hela embl 20x confinement 20.4 14.9 7.3	control	20.4	2213.16	688.928	50	100	31.1288		20170928 hela embl confinement 20.5 9.4 5.3 lata 5uM 30 min incubation	Lat A 2 µM	20	2218.16	633.886	173	100.045	28.59		20170830 hela embl confinement lata5um ricm wo incubation	Lat A 5 µM	12.1	1963.79	635.908	170	92.018	29.797		20211026_2	Y-27	11.2	1575.78	125	125	87.4178	6.93449
20170602 hela embl confinement 30min then lata2uM	control	20.4	2218.5	514.796	53	100	23.2047		20170310 hela embl 20x confinement 14.9 12.4	Lat A 2 µM	20	2362.4	560.438	21	107.5	25.5026		20170928 hela embl confinement 20.5 9.4 5.3 lata 5uM 30 min incubation_1	Lat A 5 µM	11.4	2257.6	717.022	165	106.321	33.7681		20211026_4	Y-27	11.2	1505.9	107	107	90.9885	6.4651
20170924 hela embl confinement 20.5 9.4 5.3 lata 2uM wo incubation_1	control	20	2424.33	584.741	19	100	24.1197		20170623 hela confinement lata 0	Lat A 2 µM	20	2062.61	643.343	146	96.9582	30.242		20170924 hela embl confinement 20.5 9.4 5.3 lata 5uM wo incubation	Lat A 5 µM	9.4	2110.79	592.348	585	93.4055	26.2122		20211005_3	Y-27	9.4	1973.03	483.01	206	92.2729	22.589
20170924 hela embl confinement 20.5 9.4 5.3 lata 2uM wo incubation	control	20	2251.67	712.543	1503	100	31.6451		20170221 hela embl 20x confinement with 2um lat 19.8 10.3 3.08_3 GOOD	Lat A 2 µM	19.8	2420.24	650.309	142	105.641	28.3854		20170803 20X_HeLa lata 5uM and RICM for control, without incubation	Lat A 5 µM	7.5	2254.84	683.371	140	103.843	31.4715		20211005_1	Y-27	7.8	1251.43	304.142	225	71.65	17.4135
20170924 hela embl confinement 20.5 9.4 5.3 lata 5uM wo incubation	control	20	2259.82	562.781	143	100	24.9038		20170221 hela embl 20x confinement with 2um lat 19.8 10.3 3.08_2 GOOD	Lat A 2 µM	19.8	2319.51	745.569	51	103.449	33.252		20170830 hela embl confinement lata5um ricm wo incubation	Lat A 5 µM	6.7	1605.99	448.021	88	75.2525	20.9931		20211005_1	Y-27	5.3	1251.1	321.206	200	71.631	18.3905
20170924 hela embl confinement 20.5 9.4 5.3 lata 5uM wo incubation_1	control	20	2205.62	643.041	402	100	29.1547		20170221 hela embl 20x confinement with 2um lat 19.8 10.3 3.08_1	Lat A 2 µM	19.8	2165.6	611.822	78	98.7742	27.9055		20170928 hela embl confinement 20.5 9.4 5.3 lata 5uM 30 min incubation_1	Lat A 5 µM	6.5	2094	530.806	135	98.6167	24.9983		20211005_3	Y-27	5.3	1321.91	323.291	175	61.822	15.1193
20170928 hela embl confinement 20.5 9.4 5.3 lata 2uM 30 min incubation	control	20	2175.49	574.654	112	100	26.4149		20170623 hela confinement lata 3	Lat A 2 µM	19.8	2199.5	696.735	56	100.457	31.8217		20170924 hela embl confinement 20.5 9.4 5.3 lata 5uM wo incubation	Lat A 5 µM	5.3	1951.74	625.591	304	86.3671	27.6833		20211026_1	Y-27	5.1	1249.21	91	91	73.9541	5.38725
20170928 hela embl confinement 20.5 9.4 5.3 lata 2uM 30 min incubation_1	control	20	2378.03	610.251	100	100	25.6621		20170602 hela embl confinement 30min then lata2uM	Lat A 2 µM	19	2278.82	486.787	43	102.719	21.9421		20170924 hela embl confinement 20.5 9.4 5.3 lata 5uM wo incubation_1	Lat A 5 µM	5.1	1807.29	525.861	263	81.9401	23.8419		20211026_2	Y-27	5.1	1264.13	125	125	70.1289	6.93449
20170928 hela embl confinement 20.5 9.4 5.3 lata 5uM 30 min incubation	control	20	2217.16	535.508	226	100	24.1529		20170601 hela embl confinement lata2uM	Lat A 2 µM	17.6	2059.1	587.304	61	96.7924	27.6075											20211026_4	Y-27	5.1	1105.05	52	52	66.7687	3.14192
20170928 hela embl confinement 20.5 9.4 5.3 lata 5uM 30 min incubation_1	control	20	2123.37	583.531	138	100	27.4813		20170310 hela embl 20x confinement 14.9 12.4	Lat A 2 µM	17.1	1983.59	560.247	120	90.2628	25.4939
20170803 20X_HeLa lata 5uM and RICM for control, without incubation	control	20	2171.39	921.422	89	100	42.4346		20170219 hela embl 20x confinement with 2um lat 20.4 10.4 5	Lat A 2 µM	16.9	2144.77	759.555	57	104.52	37.0149
20170219 hela embl 20x confinement with 2um lat 20.4 10.4 5	control	20	2052.02	456.139	60	100	22.2287		20170310 hela embl 20x confinement 20.4 14.9 7.3	Lat A 2 µM	15.6	2170.55	543.981	135	98.0746	24.5794		condition	h	h_st	v	v_st	N	n			condition	h	h_st	v	v_st	N	n	p-value
20170310 hela embl 20x confinement 14.9 12.4	control	20	2197.57	739.589	125	100	33.6548		20170623 hela confinement lata 0	Lat A 2 µM	14.5	1978.74	624.361	120	93.0157	29.3497		control	20.0933	0.433855	100	0	30	165.213			Lat A 2 µM	20.0154	0.655548	100.938	5.50322	13	117.024	0.550361
20170623 hela confinement lata 0	control	20	2127.32	552.53	101	100	25.9731		20170623 hela confinement lata 2	Lat A 2 µM	14.4	1648.04	410.87	13	78.0063	19.4476			12.1	1.8421	86.8609	7.64116	19					13.6455	0.655548	94.1775	5.50322	11		0.0161225
20170623 hela confinement lata 2	control	20	2112.7	575.923	78	100	27.26		20170221 hela embl 20x confinement with 2um lat 19.8 10.3 3.08_3 GOOD	Lat A 2 µM	11.4	2102.45	582.353	98	91.7702	25.4192			7.08192	1.72801	78.8321	10.7627	26					6.87545	1.65337	90.4441	14.9782	11		5.34205e-09
20171201 hela embl dmem wo incub PIx1000 19.8 9.4 5.3	control	19.8	2106.38	699.394	200	100	33.2036		20170601 hela embl confinement lata2uM	Lat A 2 µM	11.1	2216.38	705.171	142	104.186	33.1481			3.60286	1.05066	73.9731	10.9696	14					3.45714	0.830376	79.1414	18.8977	7		0.521901
20170830 hela embl confinement lata5um ricm wo incubation	control	19.8	2134.14	740.622	140	100	34.7036		20170602 hela embl confinement 30min then lata2uM	Lat A 2 µM	11	2096.3	616.752	71	94.4916	27.8004
20170221 hela embl 20x confinement with 2um lat 19.8 10.3 3.08_3 GOOD	control	19.8	2291	549.931	74	100	24.004		20170928 hela embl confinement 20.5 9.4 5.3 lata 2uM 30 min incubation_1	Lat A 2 µM	10.4	2147.59	574.673	140	90.3096	24.1659
20170221 hela embl 20x confinement with 2um lat 19.8 10.3 3.08_2 GOOD	control	19.8	2242.18	588.965	46	100	26.2675		20170928 hela embl confinement 20.5 9.4 5.3 lata 5uM 30 min incubation	Lat A 2 µM	10.1	2095.74	519.02	171	94.5236	23.4092		condition	h	h_st	v	v_st	N	n	p-value		condition	h	h_st	v	v_st	N	n	p-value
20170221 hela embl 20x confinement with 2um lat 19.8 10.3 3.08_1	control	19.8	2192.48	728.65	33	100	33.2341		20170928 hela embl confinement 20.5 9.4 5.3 lata 2uM 30 min incubation	Lat A 2 µM	9.9	2112.04	560.853	395	97.0831	25.7805		Lat A 5 µM	19.9333	0.11547	98.0512	2.90537	3	199.692	0.365222		Y-27	20.08	0.383406	97.9313	6.66508	5	166.714	0.134782
20170623 hela confinement lata 4	control	19.8	2122.16	546.144	148	100	25.7353		20170924 hela embl confinement 20.5 9.4 5.3 lata 2uM wo incubation_1	Lat A 2 µM	9.4	2211.93	639.614	617	91.2391	26.3831			13.46	2.72318	96.1707	7.4161	4		0.0789617			11.2	0	89.2031	2.52485	2		0.406658
20170623 hela confinement lata 3	control	19.8	2189.5	623.157	213	100	28.4612		20170221 hela embl 20x confinement with 2um lat 19.8 10.3 3.08_2 GOOD	Lat A 2 µM	8.3	2299.18	603.886	72	102.542	26.933			6.75	1.57956	89.9042	10.7058	6		0.054623			6.15714	1.73384	72.604	9.5479	7		0.287206
20211026_1	control	19.8	1689.17	235	235	100	13.9121		20170221 hela embl 20x confinement with 2um lat 19.8 10.3 3.08_1	Lat A 2 µM	7.5	2297.36	620.528	28	104.784	28.3026
20211026_2	control	19.8	1802.58	508	508	100	28.1818		20170310 hela embl 20x confinement 20.4 14.9 7.3	Lat A 2 µM	6.5	2036.21	500.4	52	92.0047	22.6102
20211026_4	control	19.8	1655.04	228	228	100	13.7761		20170924 hela embl confinement 20.5 9.4 5.3 lata 2uM wo incubation	Lat A 2 µM	6.13	1386.07	307.859	74	61.5576	13.6725
20170623 hela confinement lata 2	control	15.5	1802.96	466.386	135	85.3392	22.0753		20170623 hela confinement lata 0	Lat A 2 µM	5.9	1645.66	421.341	61	77.3584	19.8062						N average	11.2857
20171011 hela embl confinement 20.5 14.9 9.4 7.8 5.3 3.1 ricm	control	14.9	1930.45	497.56	179	95.9354	24.7267		20170219 hela embl 20x confinement with 2um lat 22 7.3 5.1	Lat A 2 µM	5.8	2465.68	705.973	22	113.85	32.5975						n average	162.161
20170310 hela embl 20x confinement 14.9 12.4	control	14.8	2011.28	718.519	29	91.5227	32.696		20170623 hela confinement lata 2	Lat A 2 µM	5.6	1701.34	443.578	127	80.5292	20.9958
20170623 hela confinement lata 0	control	14.5	1697.35	487.334	186	79.7883	22.9084		20170924 hela embl confinement 20.5 9.4 5.3 lata 2uM wo incubation_1	Lat A 2 µM	5.3	2330.84	700.426	297	96.1438	28.8916
20170221 hela embl 20x confinement with 2um lat 19.8 10.3 3.08_3 GOOD	control	13.8	2101.17	632.928	24	91.7143	27.6267		20170928 hela embl confinement 20.5 9.4 5.3 lata 2uM 30 min incubation	Lat A 2 µM	5.3	1692.39	445.321	199	77.7934	20.4699
20170219 hela embl 20x confinement with 2um lat 20.4 10.4 5	control	13.6	1778.32	464.376	57	86.6619	22.6301		20170219 hela embl 20x confinement with 2um lat 22 7.3 5.1	Lat A 2 µM	4.5	2200.6	581.429	148	101.61	26.8468
20170310 hela embl 20x confinement 20.4 14.9 7.3	control	12.3	1686.48	362.201	99	76.2024	16.3658		20170602 hela embl confinement 30min then lata2uM	Lat A 2 µM	4.5	1789.53	429.004	68	80.6639	19.3376
20170601 hela embl confinement lata2uM	control	12.3	1797.84	499.759	171	84.5113	23.4923		20170928 hela embl confinement 20.5 9.4 5.3 lata 2uM 30 min incubation_1	Lat A 2 µM	3.7	1395.2	366.048	42	58.6704	15.3929
20170928 hela embl confinement 20.5 9.4 5.3 lata 5uM 30 min incubation_1	control	11.9	2006.13	492.616	107	94.4787	23.1997		20170928 hela embl confinement 20.5 9.4 5.3 lata 5uM 30 min incubation	Lat A 2 µM	3.2	1263.57	266.478	23	56.9906	12.0189
20211026_1	control	11.2	1518.41	445	445	89.8906	26.3443		20170221 hela embl 20x confinement with 2um lat 19.8 10.3 3.08_1	Lat A 2 µM	3.2	1852.65	485.449	67	84.5006	22.1416
20211026_2	control	11.2	1599.42	335	335	88.7295	18.5844		20170221 hela embl 20x confinement with 2um lat 19.8 10.3 3.08_2 GOOD	Lat A 2 µM	2.8	2314.55	669.526	78	103.228	29.8606
20211026_4	control	11.2	1470.97	277	277	88.8781	16.7367		20170623 hela confinement lata 4	Lat A 2 µM	2.3	1449.99	390.359	83	68.326	18.3944
20170928 hela embl confinement 20.5 9.4 5.3 lata 2uM 30 min incubation_1	control	10.8	1944.65	459.973	89	81.7759	19.3426
20170830 hela embl confinement lata5um ricm wo incubation	control	10.5	1607.54	485.679	151	75.3249	22.7577
20170928 hela embl confinement 20.5 9.4 5.3 lata 2uM 30 min incubation	control	10.4	2327.83	560.796	78	107.002	25.7779
20170221 hela embl 20x confinement with 2um lat 19.8 10.3 3.08_1	control	10.4	1851.53	425.027	36	84.4491	19.3857
20170310 hela embl 20x confinement 14.9 12.4	control	10.4	1949.58	496.768	86	88.7152	22.6053
20170803 20X_HeLa lata 5uM and RICM for control, without incubation	control	10.2	1714.34	651.793	94	78.9511	30.0173
20170602 hela embl confinement 30min then lata2uM	control	10	1785.6	456.573	91	80.4869	20.5803
20171201 hela embl dmem wo incub PIx1000 19.8 9.4 5.3	control	9.4	1995.3	485.794	86	94.7263	23.063
20171011 hela embl confinement 20.5 14.9 9.4 7.8 5.3 3.1 ricm	control	9.4	1571.03	481.717	224	78.0736	23.9394
20170924 hela embl confinement 20.5 9.4 5.3 lata 2uM wo incubation_1	control	9.4	1796.07	388.87	131	74.0852	16.0403
20170924 hela embl confinement 20.5 9.4 5.3 lata 5uM wo incubation	control	9.4	1872.44	448.569	351	82.858	19.8498
20170924 hela embl confinement 20.5 9.4 5.3 lata 5uM wo incubation_1	control	9.4	1729.96	480.344	534	78.4344	21.7782
20211005_1	control	9.4	1654.46	423.491	125	94.7254	24.2468
20211005_3	control	9.4	1812.55	455.711	244	84.7678	21.3123
20170221 hela embl 20x confinement with 2um lat 19.8 10.3 3.08_2 GOOD	control	8.8	2080.08	401.627	33	92.7707	17.9124
20170928 hela embl confinement 20.5 9.4 5.3 lata 5uM 30 min incubation	control	7.9	1810.65	446.519	213	81.6653	20.1393
20171011 hela embl confinement 20.5 14.9 9.4 7.8 5.3 3.1 ricm	control	7.8	1884	449.941	142	93.6272	22.3602
20211005_3	control	7.5	2175.84	612.685	172	101.758	28.6535
20170830 hela embl confinement lata5um ricm wo incubation	control	7.4	1495.02	420.076	120	70.0528	19.6837
20170623 hela confinement lata 3	control	6.6	1591.92	502.517	130	72.7072	22.9512
20170310 hela embl 20x confinement 20.4 14.9 7.3	control	6.4	1913.76	470.425	69	86.4718	21.2558
20170623 hela confinement lata 4	control	6.3	1365.13	375.894	167	64.3276	17.7128
20170602 hela embl confinement 30min then lata2uM	control	6	1725.16	434.758	74	77.7624	19.5969
20170924 hela embl confinement 20.5 9.4 5.3 lata 2uM wo incubation	control	5.93	1330.38	350.938	179	59.0843	15.5857
20170623 hela confinement lata 2	control	5.7	1532.2	412.196	187	72.5231	19.5104
20171201 hela embl dmem wo incub PIx1000 19.8 9.4 5.3	control	5.3	1212.33	252.55	30	57.555	11.9898
20171011 hela embl confinement 20.5 14.9 9.4 7.8 5.3 3.1 ricm	control	5.3	1483.35	516.243	76	73.7165	25.6552
20170924 hela embl confinement 20.5 9.4 5.3 lata 2uM wo incubation_1	control	5.3	1781.88	507.304	459	73.4998	20.9255
20170924 hela embl confinement 20.5 9.4 5.3 lata 5uM wo incubation	control	5.3	1718.01	416.616	206	76.0242	18.4359
20170928 hela embl confinement 20.5 9.4 5.3 lata 2uM 30 min incubation	control	5.3	1589.72	366.354	72	73.0739	16.8401
20211005_1	control	5.3	1404.92	415.469	296	80.4382	23.7875
20211026_2	control	5.1	1390.67	103	103	77.1488	5.71402
20211026_4	control	5.1	1286.93	70	70	77.7582	4.2295
20170623 hela confinement lata 0	control	4.9	1535.04	401.135	115	72.1586	18.8564
20170803 20X_HeLa lata 5uM and RICM for control, without incubation	control	4.8	1420.57	483.043	198	65.422	22.2458
20170219 hela embl 20x confinement with 2um lat 22 7.3 5.1	control	4.7	1881.84	524.648	118	86.8919	24.2251
20170219 hela embl 20x confinement with 2um lat 22 7.3 5.1	control	4.4	1630.81	380.07	17	75.3007	17.5493
20170928 hela embl confinement 20.5 9.4 5.3 lata 5uM 30 min incubation_1	control	4.2	1603.41	384.8	54	75.5123	18.1221
20170924 hela embl confinement 20.5 9.4 5.3 lata 2uM wo incubation	control	4.19	1296.04	273.46	35	57.5589	12.1448
20170924 hela embl confinement 20.5 9.4 5.3 lata 5uM wo incubation_1	control	4.05	1750.55	440.345	174	79.368	19.9647
20170601 hela embl confinement lata2uM	control	3.7	1694.43	414.696	90	79.6501	19.4937
20170221 hela embl 20x confinement with 2um lat 19.8 10.3 3.08_2 GOOD	control	3.1	1756.71	425.497	39	78.3487	18.977
20170221 hela embl 20x confinement with 2um lat 19.8 10.3 3.08_1	control	3.1	2049.36	626.913	55	93.4723	28.5939
20170623 hela confinement lata 3	control	2.8	1676.98	399.609	78	76.5922	18.2512
20170623 hela confinement lata 4	control	2.7	1492.67	432.608	185	70.3375	20.3853
20170221 hela embl 20x confinement with 2um lat 19.8 10.3 3.08_3 GOOD	control	2.5	1714.29	425.196	112	74.8272	18.5594
20171011 hela embl confinement 20.5 14.9 9.4 7.8 5.3 3.1 ricm	control	1.3	1009.81	283.777	38	50.1834	14.1026
