# Supplementary material for: A mechano-osmotic feedback couples cell volume to the rate of cell deformation
Source: eLife journal article supplement (doi:10.7554/elife.72381), 2022-04-13
Supplement: supp [file contact_area.xlsx]

## Sheet: Sheet1
h (µm)	1.3	4.1	5.3	6.3	7.1	7.8	9.4	11.2	14.9
V (µm3)	2331.17	1493.63	1425.7	1849.61	1437.93	1721.19	1503.12	1724.51	2350.77
r theor (µm)	15.4714	10.7685	9.25338	9.66707	8.02906	8.38093	7.13442	7.00081	7.08658
S theor (µm2)	1805.33	1006.01	846.144	969.84	763.231	852.071	741.186	800.606	978.982
V stdev (µm3)	691.983	334.858	309.803	526.001	416.92	482.261	418.28	517.297	620.379
A (µm2)	582.756	263.229	183.621	172.633	118.723	128.328	66.574	66.958	42.4391
A stdev (µm2)	236.122	77.9828	52.1474	62.517	47.4746	52.6438	27.9161	27.672	20.8308
r exp (µm)	13.6197	9.15361	7.64516	7.41289	6.14742	6.39124	4.60339	4.61664	3.67543
n	24	99	66	43	94	162	73	85	69
V/h	751.99	364.3	268.999	293.589	202.525	220.666	159.907	153.974	157.77
