# Supplementary material for: A mechano-osmotic feedback couples cell volume to the rate of cell deformation
Source: eLife journal article supplement (doi:10.7554/elife.72381), 2022-04-13
Supplement: supp [file control.xlsx]

## Sheet: Sheet1
	area	mean	intdens
t.tif:p2_w11 GFP_t8	109.207	9419.13
t.tif:p2_w11 GFP_t9	109.207	1497.09
				v	a	h
t.tif:p2_w11 GFP_t8	93.502	15407.5	1.44062e+06	187.004	361.376	40.4928
t.tif:p2_w11 GFP_t9	93.502	5433.12	508006	187.004	427.374	11.2098
t.tif:p2_w11 GFP_t8	93.502	16130.2	1.5082e+06
t.tif:p2_w11 GFP_t9	93.502	6287.88	587927

## Sheet: 40.49 11.21
					t, s
b AP.tif	1	1	2241.81	100	0
b AP.tif	1	2	2246.03	100.188	0.5
b AP.tif	1	3	2240.99	99.9631	1
b AP.tif	1	4	2243.45	100.073	1.5
b AP.tif	1	5	2229.39	99.4459	2
b AP.tif	1	6	2233.48	99.6281	2.5
b AP.tif	1	7	2238.68	99.8601	3
b AP.tif	1	8	2250.72	100.397	3.5
d.tif	1	9	2080.18	92.7902	4
d.tif	1	10	2082.41	92.8896	4.5
d.tif	1	11	2083.43	92.9352	5
d.tif	1	12	2083.86	92.9543	5.5
d.tif	1	13	2081.64	92.8553	6
d.tif	1	14	2095.94	93.4929	6.5
d.tif	1	15	2082.44	92.8907	7
d.tif	1	16	2082.98	92.9147	7.5
d.tif	1	17	2093.03	93.3634	8
d.tif	1	18	2090.02	93.229	8.5
d.tif	1	19	2080.59	92.8084	9
b AP.tif	2	1	1960.17	100	0
b AP.tif	2	2	1948.45	99.4023	0.5
b AP.tif	2	3	1953.59	99.6646	1
b AP.tif	2	4	1939.23	98.932	1.5
b AP.tif	2	5	1942.73	99.1106	2
b AP.tif	2	6	1936.46	98.7906	2.5
b AP.tif	2	7	1928.83	98.4015	3
b AP.tif	2	8	1939.89	98.9656	3.5
d.tif	2	9	1763.44	89.9638	4
d.tif	2	10	1766.76	90.1332	4.5
d.tif	2	11	1764.22	90.0036	5
d.tif	2	12	1766.44	90.1169	5.5
d.tif	2	13	1762.41	89.9114	6
d.tif	2	14	1759.73	89.7743	6.5
d.tif	2	15	1762.89	89.9356	7
d.tif	2	16	1752.87	89.4247	7.5
d.tif	2	17	1765.06	90.0462	8
d.tif	2	18	1769.88	90.2923	8.5
d.tif	2	19	1765.2	90.0534	9
b AP.tif	3	1	2403.03	100	0
b AP.tif	3	2	2403.42	100.016	0.5
b AP.tif	3	3	2397.74	99.7799	1
b AP.tif	3	4	2399.18	99.8399	1.5
b AP.tif	3	5	2388.65	99.4015	2
b AP.tif	3	6	2388.17	99.3814	2.5
b AP.tif	3	7	2395.76	99.6976	3
b AP.tif	3	8	2393.64	99.6093	3.5
d.tif	3	9	2177.56	90.6172	4
d.tif	3	10	2161.33	89.9418	4.5
d.tif	3	11	2154.71	89.6664	5
d.tif	3	12	2148.48	89.4073	5.5
d.tif	3	13	2150.51	89.4914	6
d.tif	3	14	2139.23	89.0224	6.5
d.tif	3	15	2145.51	89.2836	7
d.tif	3	16	2148.82	89.4212	7.5
d.tif	3	17	2139.52	89.0342	8
d.tif	3	18	2140.75	89.0852	8.5
d.tif	3	19	2137.08	88.9329	9
b AP.tif	4	1	3979.37	100	0
b AP.tif	4	2	3964.23	99.6196	0.5
b AP.tif	4	3	3977.25	99.9466	1
b AP.tif	4	4	3928.19	98.7138	1.5
b AP.tif	4	5	3957.75	99.4567	2
b AP.tif	4	6	3936.38	98.9197	2.5
b AP.tif	4	7	3946.59	99.1762	3
b AP.tif	4	8	3956.36	99.4218	3.5
d.tif	4	9	3456.23	86.8536	4
d.tif	4	10	3447.51	86.6345	4.5
d.tif	4	11	3444.49	86.5587	5
d.tif	4	12	3438.55	86.4093	5.5
d.tif	4	13	3438.81	86.416	6
d.tif	4	14	3441.22	86.4764	6.5
d.tif	4	15	3433.27	86.2768	7
d.tif	4	16	3442.71	86.514	7.5
d.tif	4	17	3438.35	86.4044	8
d.tif	4	18	3431.05	86.2209	8.5
d.tif	4	19	3429.4	86.1794	9
b AP.tif	5	1	2514.89	100	0
b AP.tif	5	2	2515.26	100.015	0.5
b AP.tif	5	3	2522.1	100.287	1
b AP.tif	5	4	2517.58	100.107	1.5
b AP.tif	5	5	2524.98	100.401	2
b AP.tif	5	6	2512.85	99.9188	2.5
b AP.tif	5	7	2514.8	99.9966	3
b AP.tif	5	8	2513.99	99.9641	3.5
d.tif	5	9	1924.91	76.5405	4
d.tif	5	10	1905.54	75.7704	4.5
d.tif	5	11	1903.23	75.6784	5
d.tif	5	12	1900.6	75.5739	5.5
d.tif	5	13	1881.81	74.827	6
d.tif	5	14	1887.78	75.0643	6.5
d.tif	5	15	1876.97	74.6343	7
d.tif	5	16	1879.43	74.7323	7.5
d.tif	5	17	1885.84	74.987	8
d.tif	5	18	1868.8	74.3096	8.5
d.tif	5	19	1870.72	74.386	9
b AP.tif	6	1	2111.14	100	0
b AP.tif	6	2	2119.19	100.381	0.5
b AP.tif	6	3	2113.38	100.106	1
b AP.tif	6	4	2107.72	99.8382	1.5
b AP.tif	6	5	2105.01	99.7098	2
b AP.tif	6	6	2096.77	99.3193	2.5
b AP.tif	6	7	2102.85	99.6073	3
b AP.tif	6	8	2103.05	99.6169	3.5
d.tif	6	9	1856.79	87.9519	4
d.tif	6	10	1851.05	87.6803	4.5
d.tif	6	11	1840.9	87.1997	5
d.tif	6	12	1842.55	87.2778	5.5
d.tif	6	13	1832.18	86.7863	6
d.tif	6	14	1835.61	86.9491	6.5
d.tif	6	15	1827.92	86.5845	7
d.tif	6	16	1832.64	86.8083	7.5
d.tif	6	17	1840.9	87.1995	8
d.tif	6	18	1826.25	86.5057	8.5
d.tif	6	19	1818.68	86.1467	9
b AP.tif	7	1	2344.12	100	0
b AP.tif	7	2	2333.37	99.5417	0.5
b AP.tif	7	3	2343.62	99.979	1
b AP.tif	7	4	2344.55	100.018	1.5
b AP.tif	7	5	2342.22	99.9191	2
b AP.tif	7	6	2320.69	99.0009	2.5
b AP.tif	7	7	2322.94	99.0966	3
b AP.tif	7	8	2341.63	99.8939	3.5
d.tif	7	9	2077.9	88.6435	4
d.tif	7	10	2073.78	88.4674	4.5
d.tif	7	11	2062.29	87.9773	5
d.tif	7	12	2055.48	87.687	5.5
d.tif	7	13	2057.54	87.7745	6
d.tif	7	14	2049.18	87.4181	6.5
d.tif	7	15	2056.61	87.7349	7
d.tif	7	16	2049.46	87.4298	7.5
d.tif	7	17	2042.25	87.1222	8
d.tif	7	18	2042.86	87.1484	8.5
d.tif	7	19	2048.31	87.381	9
b AP.tif	8	1	1655.92	100	0
b AP.tif	8	2	1649.61	99.6192	0.5
b AP.tif	8	3	1660.75	100.292	1
b AP.tif	8	4	1639.05	98.9815	1.5
b AP.tif	8	5	1657.73	100.11	2
b AP.tif	8	6	1638.29	98.9357	2.5
b AP.tif	8	7	1659.96	100.244	3
b AP.tif	8	8	1659.05	100.189	3.5
d.tif	8	9	1448.5	87.4739	4
d.tif	8	10	1450.69	87.6064	4.5
d.tif	8	11	1450.19	87.5762	5
d.tif	8	12	1447.78	87.4306	5.5
d.tif	8	13	1446.74	87.3676	6
d.tif	8	14	1442.58	87.1164	6.5
d.tif	8	15	1448.32	87.4634	7
d.tif	8	16	1454.45	87.8336	7.5
d.tif	8	17	1449.01	87.5052	8
d.tif	8	18	1442.88	87.1346	8.5
d.tif	8	19	1445.63	87.3008	9
b AP.tif	9	1	1986.15	100	0
b AP.tif	9	2	1978.99	99.6392	0.5
b AP.tif	9	3	2000.35	100.715	1
b AP.tif	9	4	1987.48	100.067	1.5
b AP.tif	9	5	1975.31	99.4539	2
b AP.tif	9	6	1977.1	99.5444	2.5
b AP.tif	9	7	1971.86	99.2803	3
b AP.tif	9	8	1993.79	100.384	3.5
d.tif	9	9	1718.21	86.5097	4
d.tif	9	10	1713.51	86.2729	4.5
d.tif	9	11	1718.23	86.5106	5
d.tif	9	12	1715.3	86.363	5.5
d.tif	9	13	1711.2	86.1562	6
d.tif	9	14	1703.22	85.7546	6.5
d.tif	9	15	1706.36	85.9129	7
d.tif	9	16	1715.36	86.3659	7.5
d.tif	9	17	1706.86	85.9381	8
d.tif	9	18	1708.48	86.0194	8.5
d.tif	9	19	1711.17	86.1548	9
b AP.tif	10	1	1570.1	100	0
b AP.tif	10	2	1563.89	99.6047	0.5
b AP.tif	10	3	1578.53	100.537	1
b AP.tif	10	4	1558.97	99.2912	1.5
b AP.tif	10	5	1573.29	100.203	2
b AP.tif	10	6	1569.42	99.9566	2.5
b AP.tif	10	7	1558.86	99.2842	3
b AP.tif	10	8	1565.63	99.7152	3.5
d.tif	10	9	1347.5	85.8225	4
d.tif	10	10	1345.45	85.6919	4.5
d.tif	10	11	1335.45	85.0554	5
d.tif	10	12	1339.83	85.3345	5.5
d.tif	10	13	1343.98	85.5987	6
d.tif	10	14	1333.87	84.9543	6.5
d.tif	10	15	1331.47	84.802	7
d.tif	10	16	1337.57	85.1904	7.5
d.tif	10	17	1330.98	84.7705	8
d.tif	10	18	1332.37	84.8591	8.5
d.tif	10	19	1335.17	85.0372	9
b AP.tif	11	1	1796.2	100	0
b AP.tif	11	2	1793.92	99.8733	0.5
b AP.tif	11	3	1802.11	100.329	1
b AP.tif	11	4	1787.7	99.527	1.5
b AP.tif	11	5	1799.01	100.156	2
b AP.tif	11	6	1784.99	99.376	2.5
b AP.tif	11	7	1783.64	99.3007	3
b AP.tif	11	8	1798.48	100.127	3.5
d.tif	11	9	1634.44	90.9943	4
d.tif	11	10	1636.74	91.1222	4.5
d.tif	11	11	1635.88	91.0743	5
d.tif	11	12	1628.31	90.6533	5.5
d.tif	11	13	1630.26	90.7617	6
d.tif	11	14	1633.13	90.9214	6.5
d.tif	11	15	1634.69	91.0084	7
d.tif	11	16	1634.68	91.0076	7.5
d.tif	11	17	1640.81	91.349	8
d.tif	11	18	1633.87	90.9627	8.5
d.tif	11	19	1638.96	91.2459	9
b AP.tif	12	1	1799.77	100	0
b AP.tif	12	2	1791.2	99.5237	0.5
b AP.tif	12	3	1797.08	99.8504	1
b AP.tif	12	4	1798.72	99.9414	1.5
b AP.tif	12	5	1791.28	99.5278	2
b AP.tif	12	6	1795.34	99.7537	2.5
b AP.tif	12	7	1794.76	99.7216	3
b AP.tif	12	8	1782.66	99.0489	3.5
d.tif	12	9	1644.25	91.3586	4
d.tif	12	10	1645.63	91.4352	4.5
d.tif	12	11	1656.02	92.0125	5
d.tif	12	12	1651.49	91.7608	5.5
d.tif	12	13	1653.32	91.8627	6
d.tif	12	14	1655.53	91.9854	6.5
d.tif	12	15	1653.54	91.8751	7
d.tif	12	16	1653.56	91.8761	7.5
d.tif	12	17	1658.46	92.1483	8
d.tif	12	18	1654.17	91.9098	8.5
d.tif	12	19	1653.96	91.898	9
b AP.tif	13	1	4000.73	100	0
b AP.tif	13	2	3992.83	99.8026	0.5
b AP.tif	13	3	3991.91	99.7796	1
b AP.tif	13	4	3992.39	99.7914	1.5
b AP.tif	13	5	3990.09	99.734	2
b AP.tif	13	6	3966.22	99.1374	2.5
b AP.tif	13	7	3980.21	99.4871	3
b AP.tif	13	8	3980.45	99.4932	3.5
d.tif	13	9	3539.34	88.4673	4
d.tif	13	10	3540.79	88.5035	4.5
d.tif	13	11	3544.72	88.6017	5
d.tif	13	12	3538.85	88.4551	5.5
d.tif	13	13	3544.81	88.6039	6
d.tif	13	14	3546.21	88.639	6.5
d.tif	13	15	3547.16	88.6628	7
d.tif	13	16	3550.19	88.7384	7.5
d.tif	13	17	3545.26	88.6152	8
d.tif	13	18	3550.49	88.7461	8.5
d.tif	13	19	3553.92	88.8317	9
b AP.tif	14	1	2266.36	100	0
b AP.tif	14	2	2254.07	99.4573	0.5
b AP.tif	14	3	2260.61	99.7461	1
b AP.tif	14	4	2263.42	99.8703	1.5
b AP.tif	14	5	2275.87	100.419	2
b AP.tif	14	6	2255.86	99.5365	2.5
b AP.tif	14	7	2273.33	100.308	3
b AP.tif	14	8	2266.6	100.01	3.5
d.tif	14	9	1997.62	88.1421	4
d.tif	14	10	1998.73	88.1912	4.5
d.tif	14	11	1992.87	87.9323	5
d.tif	14	12	1983.05	87.4992	5.5
d.tif	14	13	1992.31	87.9077	6
d.tif	14	14	1986.57	87.6546	6.5
d.tif	14	15	1993.86	87.9763	7
d.tif	14	16	1992.65	87.9229	7.5
d.tif	14	17	1987.17	87.681	8
d.tif	14	18	1987.16	87.6806	8.5
d.tif	14	19	1990.89	87.845	9
b AP.tif	15	1	2918.04	100	0
b AP.tif	15	2	2917.12	99.9682	0.5
b AP.tif	15	3	2924.17	100.21	1
b AP.tif	15	4	2914.93	99.8935	1.5
b AP.tif	15	5	2911.81	99.7866	2
b AP.tif	15	6	2905.78	99.5799	2.5
b AP.tif	15	7	2908.36	99.6682	3
b AP.tif	15	8	2907.07	99.624	3.5
d.tif	15	9	2496.1	85.5401	4
d.tif	15	10	2487.83	85.2568	4.5
d.tif	15	11	2492.46	85.4154	5
d.tif	15	12	2490.67	85.354	5.5
d.tif	15	13	2485.96	85.1927	6
d.tif	15	14	2477.83	84.9141	6.5
d.tif	15	15	2479.24	84.9623	7
d.tif	15	16	2482.87	85.0869	7.5
d.tif	15	17	2474.82	84.8111	8
d.tif	15	18	2483.55	85.11	8.5
d.tif	15	19	2485.95	85.1923	9
b AP.tif	16	1	2046.93	100	0
b AP.tif	16	2	2047.84	100.044	0.5
b AP.tif	16	3	2056.58	100.471	1
b AP.tif	16	4	2040.57	99.6894	1.5
b AP.tif	16	5	2043.63	99.8386	2
b AP.tif	16	6	2053.53	100.322	2.5
b AP.tif	16	7	2046.88	99.9974	3
b AP.tif	16	8	2034.15	99.3757	3.5
d.tif	16	9	1796.7	87.7752	4
d.tif	16	10	1787.57	87.3291	4.5
d.tif	16	11	1790.01	87.4484	5
d.tif	16	12	1787.93	87.3467	5.5
d.tif	16	13	1798.41	87.8585	6
d.tif	16	14	1791.74	87.5331	6.5
d.tif	16	15	1796.36	87.7588	7
d.tif	16	16	1790.57	87.4759	7.5
d.tif	16	17	1790.48	87.4712	8
d.tif	16	18	1791.09	87.501	8.5
d.tif	16	19	1794.67	87.6762	9
b AP.tif	17	1	3317.32	100	0
b AP.tif	17	2	3315.31	99.9395	0.5
b AP.tif	17	3	3315.69	99.9507	1
b AP.tif	17	4	3319.31	100.06	1.5
b AP.tif	17	5	3316.89	99.9871	2
b AP.tif	17	6	3315.91	99.9575	2.5
b AP.tif	17	7	3319.47	100.065	3
b AP.tif	17	8	3296.93	99.3853	3.5
d.tif	17	9	3058.08	92.1854	4
d.tif	17	10	3059.35	92.2235	4.5
d.tif	17	11	3065.27	92.402	5
d.tif	17	12	3064.32	92.3735	5.5
d.tif	17	13	3059.71	92.2344	6
d.tif	17	14	3078.8	92.8099	6.5
d.tif	17	15	3066.12	92.4275	7
d.tif	17	16	3072.82	92.6297	7.5
d.tif	17	17	3085.47	93.011	8
d.tif	17	18	3068.83	92.5092	8.5
d.tif	17	19	3068.35	92.4949	9
b AP.tif	18	1	2250.44	100	0
b AP.tif	18	2	2251.31	100.039	0.5
b AP.tif	18	3	2244.24	99.7243	1
b AP.tif	18	4	2234.18	99.2771	1.5
b AP.tif	18	5	2241.53	99.6038	2
b AP.tif	18	6	2247.59	99.8734	2.5
b AP.tif	18	7	2240.07	99.539	3
b AP.tif	18	8	2227.19	98.9667	3.5
d.tif	18	9	2061.27	91.5938	4
d.tif	18	10	2069.88	91.9767	4.5
d.tif	18	11	2066.59	91.8301	5
d.tif	18	12	2069.13	91.9433	5.5
d.tif	18	13	2064.58	91.741	6
d.tif	18	14	2072.11	92.0757	6.5
d.tif	18	15	2068.74	91.9257	7
d.tif	18	16	2072.04	92.0724	7.5
d.tif	18	17	2076.52	92.2716	8
d.tif	18	18	2077.41	92.311	8.5
d.tif	18	19	2070.68	92.0122	9
b AP.tif	19	1	2488.9	100	0
b AP.tif	19	2	2497.01	100.326	0.5
b AP.tif	19	3	2509.57	100.83	1
b AP.tif	19	4	2491.26	100.095	1.5
b AP.tif	19	5	2497.68	100.353	2
b AP.tif	19	6	2496.39	100.301	2.5
b AP.tif	19	7	2500.19	100.454	3
b AP.tif	19	8	2479.45	99.6201	3.5
d.tif	19	9	2218.31	89.1281	4
d.tif	19	10	2220.56	89.2183	4.5
d.tif	19	11	2215.48	89.0142	5
d.tif	19	12	2213.82	88.9478	5.5
d.tif	19	13	2225.55	89.4191	6
d.tif	19	14	2218.52	89.1365	6.5
d.tif	19	15	2222.82	89.3094	7
d.tif	19	16	2217.66	89.1019	7.5
d.tif	19	17	2214.21	88.9634	8
d.tif	19	18	2221.45	89.2542	8.5
d.tif	19	19	2223.78	89.3479	9
b AP.tif	20	1	2789.97	100	0
b AP.tif	20	2	2778.25	99.5799	0.5
b AP.tif	20	3	2779.44	99.6224	1
b AP.tif	20	4	2760.33	98.9377	1.5
b AP.tif	20	5	2782.62	99.7364	2
b AP.tif	20	6	2779.56	99.6267	2.5
b AP.tif	20	7	2762.71	99.0229	3
b AP.tif	20	8	2769.76	99.2757	3.5
d.tif	20	9	2461.62	88.2311	4
d.tif	20	10	2472.01	88.6035	4.5
d.tif	20	11	2466.69	88.4127	5
d.tif	20	12	2466.44	88.4037	5.5
d.tif	20	13	2468.94	88.4935	6
d.tif	20	14	2462.39	88.2587	6.5
d.tif	20	15	2468.25	88.4688	7
d.tif	20	16	2463.69	88.305	7.5
d.tif	20	17	2460.54	88.1923	8
d.tif	20	18	2466.92	88.421	8.5
d.tif	20	19	2474.19	88.6817	9
b AP.tif	21	1	1692.96	100	0
b AP.tif	21	2	1703.1	100.599	0.5
b AP.tif	21	3	1686.06	99.5923	1
b AP.tif	21	4	1688.25	99.7214	1.5
b AP.tif	21	5	1687.91	99.7015	2
b AP.tif	21	6	1697.03	100.24	2.5
b AP.tif	21	7	1689.04	99.768	3
b AP.tif	21	8	1678.45	99.1425	3.5
d.tif	21	9	1439.37	85.0205	4
d.tif	21	10	1436.83	84.8706	4.5
d.tif	21	11	1433.35	84.6649	5
d.tif	21	12	1430.61	84.5031	5.5
d.tif	21	13	1438.77	84.9853	6
d.tif	21	14	1428.06	84.3528	6.5
d.tif	21	15	1433.55	84.6769	7
d.tif	21	16	1428.4	84.3726	7.5
d.tif	21	17	1429.56	84.4412	8
d.tif	21	18	1422.19	84.0059	8.5
d.tif	21	19	1433.37	84.6664	9
b AP.tif	22	1	3671.38	100	0
b AP.tif	22	2	3670.42	99.9738	0.5
b AP.tif	22	3	3660.12	99.6931	1
b AP.tif	22	4	3664.31	99.8072	1.5
b AP.tif	22	5	3665.94	99.8517	2
b AP.tif	22	6	3638.96	99.1168	2.5
b AP.tif	22	7	3646.86	99.332	3
b AP.tif	22	8	3643.82	99.2493	3.5
d.tif	22	9	3066.44	83.5227	4
d.tif	22	10	3067.6	83.5542	4.5
d.tif	22	11	3056.96	83.2646	5
d.tif	22	12	3050.23	83.0812	5.5
d.tif	22	13	3050.4	83.0859	6
d.tif	22	14	3051.63	83.1193	6.5
d.tif	22	15	3047.11	82.9963	7
d.tif	22	16	3049.57	83.0632	7.5
d.tif	22	17	3047.3	83.0014	8
d.tif	22	18	3035.42	82.6778	8.5
d.tif	22	19	3039.56	82.7906	9
b AP.tif	23	1	1855.02	100	0
b AP.tif	23	2	1849.21	99.6869	0.5
b AP.tif	23	3	1857.19	100.117	1
b AP.tif	23	4	1852.35	99.856	1.5
b AP.tif	23	5	1859.01	100.215	2
b AP.tif	23	6	1844.2	99.4168	2.5
b AP.tif	23	7	1859.21	100.226	3
b AP.tif	23	8	1852.17	99.8464	3.5
d.tif	23	9	1612.39	86.9205	4
d.tif	23	10	1597.06	86.0941	4.5
d.tif	23	11	1607.19	86.6401	5
d.tif	23	12	1605.35	86.541	5.5
d.tif	23	13	1596.52	86.0647	6
d.tif	23	14	1600.51	86.2798	6.5
d.tif	23	15	1595.05	85.9858	7
d.tif	23	16	1609.87	86.7846	7.5
d.tif	23	17	1603.31	86.4308	8
d.tif	23	18	1591.87	85.8139	8.5
d.tif	23	19	1593.93	85.9249	9
b AP.tif	24	1	2147.22	100	0
b AP.tif	24	2	2137.27	99.5367	0.5
b AP.tif	24	3	2163.85	100.774	1
b AP.tif	24	4	2119.44	98.7062	1.5
b AP.tif	24	5	2141.84	99.7495	2
b AP.tif	24	6	2132.13	99.2972	2.5
b AP.tif	24	7	2126.55	99.0375	3
b AP.tif	24	8	2132.51	99.315	3.5
d.tif	24	9	1841.79	85.7755	4
d.tif	24	10	1830.93	85.27	4.5
d.tif	24	11	1835.53	85.4839	5
d.tif	24	12	1838.95	85.6435	5.5
d.tif	24	13	1833.25	85.3779	6
d.tif	24	14	1835.42	85.4789	6.5
d.tif	24	15	1827.75	85.1218	7
d.tif	24	16	1834.28	85.426	7.5
d.tif	24	17	1832.99	85.3659	8
d.tif	24	18	1833.4	85.3848	8.5
d.tif	24	19	1826.29	85.0537	9
b AP.tif	25	1	2387.27	100	0
b AP.tif	25	2	2381.47	99.7571	0.5
b AP.tif	25	3	2364.26	99.0363	1
b AP.tif	25	4	2359.35	98.8304	1.5
b AP.tif	25	5	2371.58	99.343	2
b AP.tif	25	6	2348.6	98.3803	2.5
b AP.tif	25	7	2357.26	98.743	3
b AP.tif	25	8	2368.47	99.2128	3.5
d.tif	25	9	1998.64	83.7209	4
d.tif	25	10	1984.76	83.1395	4.5
d.tif	25	11	1985.97	83.1902	5
d.tif	25	12	1985.5	83.1705	5.5
d.tif	25	13	1980.84	82.9751	6
d.tif	25	14	1984.72	83.1379	6.5
d.tif	25	15	1973.1	82.6512	7
d.tif	25	16	1972.41	82.6222	7.5
d.tif	25	17	1973.3	82.6594	8
d.tif	25	18	1976.4	82.7894	8.5
d.tif	25	19	1970.4	82.538	9
b AP.tif	26	1	2860.84	100	0
b AP.tif	26	2	2873.53	100.444	0.5
b AP.tif	26	3	2866.56	100.2	1
b AP.tif	26	4	2862.57	100.06	1.5
b AP.tif	26	5	2859.83	99.9648	2
b AP.tif	26	6	2868.68	100.274	2.5
b AP.tif	26	7	2856.62	99.8525	3
b AP.tif	26	8	2864.99	100.145	3.5
d.tif	26	9	2415.31	84.4267	4
d.tif	26	10	2401.12	83.9308	4.5
d.tif	26	11	2396.7	83.776	5
d.tif	26	12	2388.46	83.488	5.5
d.tif	26	13	2389.69	83.531	6
d.tif	26	14	2381.13	83.232	6.5
d.tif	26	15	2386.57	83.4219	7
d.tif	26	16	2378.71	83.1472	7.5
d.tif	26	17	2372.96	82.9464	8
d.tif	26	18	2371.61	82.8989	8.5
d.tif	26	19	2377.85	83.1172	9
b AP.tif	27	1	1948.49	100	0
b AP.tif	27	2	1953.68	100.266	0.5
b AP.tif	27	3	1941.25	99.6285	1
b AP.tif	27	4	1944.98	99.8199	1.5
b AP.tif	27	5	1941.36	99.6341	2
b AP.tif	27	6	1939.94	99.5612	2.5
b AP.tif	27	7	1947.96	99.973	3
b AP.tif	27	8	1944.98	99.8198	3.5
d.tif	27	9	1637.19	84.0236	4
d.tif	27	10	1631.5	83.7317	4.5
d.tif	27	11	1626.54	83.4769	5
d.tif	27	12	1623.98	83.3456	5.5
d.tif	27	13	1620.34	83.1587	6
d.tif	27	14	1614.84	82.8766	6.5
d.tif	27	15	1614.51	82.8595	7
d.tif	27	16	1616.81	82.9774	7.5
d.tif	27	17	1625.38	83.4177	8
d.tif	27	18	1616.06	82.9391	8.5
d.tif	27	19	1615.88	82.9298	9
b AP.tif	28	1	2562.81	100	0
b AP.tif	28	2	2558.94	99.8489	0.5
b AP.tif	28	3	2556.33	99.7469	1
b AP.tif	28	4	2558.35	99.8258	1.5
b AP.tif	28	5	2570.04	100.282	2
b AP.tif	28	6	2541.91	99.1846	2.5
b AP.tif	28	7	2553.33	99.6299	3
b AP.tif	28	8	2542.2	99.1957	3.5
d.tif	28	9	2057.93	80.2997	4
d.tif	28	10	2047.71	79.9009	4.5
d.tif	28	11	2042.38	79.693	5
d.tif	28	12	2035.15	79.411	5.5
d.tif	28	13	2028.14	79.1374	6
d.tif	28	14	2028.73	79.1604	6.5
d.tif	28	15	2017.36	78.7165	7
d.tif	28	16	2031.52	79.2692	7.5
d.tif	28	17	2026.86	79.0874	8
d.tif	28	18	2017.21	78.7109	8.5
d.tif	28	19	2015.86	78.6581	9
b AP.tif	29	1	2966.81	100	0
b AP.tif	29	2	2954.42	99.5823	0.5
b AP.tif	29	3	2950.93	99.4647	1
b AP.tif	29	4	2953.67	99.557	1.5
b AP.tif	29	5	2953.22	99.5418	2
b AP.tif	29	6	2950.87	99.4625	2.5
b AP.tif	29	7	2949.95	99.4316	3
b AP.tif	29	8	2941.11	99.1336	3.5
d.tif	29	9	2468.49	83.2034	4
d.tif	29	10	2444.11	82.3818	4.5
d.tif	29	11	2438.08	82.1784	5
d.tif	29	12	2435.38	82.0874	5.5
d.tif	29	13	2429.1	81.8757	6
d.tif	29	14	2438.75	82.2009	6.5
d.tif	29	15	2424.69	81.7271	7
d.tif	29	16	2426.6	81.7914	7.5
d.tif	29	17	2428.95	81.8708	8
d.tif	29	18	2436.51	82.1255	8.5
d.tif	29	19	2426.56	81.7902	9
b AP.tif	30	1	2812.1	100	0
b AP.tif	30	2	2833.56	100.763	0.5
b AP.tif	30	3	2822.74	100.378	1
b AP.tif	30	4	2811.45	99.9768	1.5
b AP.tif	30	5	2823	100.388	2
b AP.tif	30	6	2818.51	100.228	2.5
b AP.tif	30	7	2820.84	100.311	3
b AP.tif	30	8	2815.52	100.122	3.5
d.tif	30	9	2342.79	83.3111	4
d.tif	30	10	2333.87	82.9936	4.5
d.tif	30	11	2322.08	82.5743	5
d.tif	30	12	2309.42	82.1244	5.5
d.tif	30	13	2309.8	82.1379	6
d.tif	30	14	2307.49	82.0557	6.5
d.tif	30	15	2306.28	82.0126	7
d.tif	30	16	2301.95	81.8586	7.5
d.tif	30	17	2298.44	81.7338	8
d.tif	30	18	2304.26	81.9409	8.5
d.tif	30	19	2306.27	82.0122	9
b AP.tif	31	1	1590.16	100	0
b AP.tif	31	2	1574.82	99.0352	0.5
b AP.tif	31	3	1578.49	99.2657	1
b AP.tif	31	4	1579.19	99.3099	1.5
b AP.tif	31	5	1578.61	99.2736	2
b AP.tif	31	6	1571.27	98.812	2.5
b AP.tif	31	7	1567.74	98.5895	3
b AP.tif	31	8	1567.17	98.5543	3.5
d.tif	31	9	1558.58	98.0136	4
d.tif	31	10	1563.37	98.3153	4.5
d.tif	31	11	1559.68	98.0832	5
d.tif	31	12	1567.85	98.5966	5.5
d.tif	31	13	1565.37	98.4406	6
d.tif	31	14	1563.3	98.3104	6.5
d.tif	31	15	1570	98.7321	7
d.tif	31	16	1564.56	98.39	7.5
d.tif	31	17	1570.73	98.7776	8
d.tif	31	18	1573.63	98.9604	8.5
d.tif	31	19	1571.68	98.8374	9
b AP.tif	32	1	2248.26	100	0
b AP.tif	32	2	2260.76	100.556	0.5
b AP.tif	32	3	2255.07	100.303	1
b AP.tif	32	4	2247.53	99.9675	1.5
b AP.tif	32	5	2251.11	100.126	2
b AP.tif	32	6	2240.33	99.6473	2.5
b AP.tif	32	7	2250.51	100.1	3
b AP.tif	32	8	2230.23	99.198	3.5
d.tif	32	9	1890.16	84.0721	4
d.tif	32	10	1890.75	84.0981	4.5
d.tif	32	11	1879.17	83.5833	5
d.tif	32	12	1880.72	83.652	5.5
d.tif	32	13	1876.2	83.451	6
d.tif	32	14	1874.05	83.3555	6.5
d.tif	32	15	1869.28	83.1434	7
d.tif	32	16	1873.82	83.3452	7.5
d.tif	32	17	1873.46	83.3292	8
d.tif	32	18	1867.97	83.0849	8.5
d.tif	32	19	1866.74	83.0302	9
b AP.tif	33	1	2355.44	100	0
b AP.tif	33	2	2346.66	99.6272	0.5
b AP.tif	33	3	2334.15	99.096	1
b AP.tif	33	4	2339.42	99.3198	1.5
b AP.tif	33	5	2323.21	98.6318	2
b AP.tif	33	6	2344.76	99.5465	2.5
b AP.tif	33	7	2339.66	99.3302	3
b AP.tif	33	8	2339.87	99.3391	3.5
d.tif	33	9	2214.09	93.9988	4
d.tif	33	10	2214.2	94.0035	4.5
d.tif	33	11	2209.79	93.8162	5
d.tif	33	12	2219.13	94.2131	5.5
d.tif	33	13	2216.26	94.0912	6
d.tif	33	14	2209.37	93.7987	6.5
d.tif	33	15	2209.99	93.8249	7
d.tif	33	16	2208.79	93.7739	7.5
d.tif	33	17	2215.52	94.0597	8
d.tif	33	18	2218.08	94.1682	8.5
d.tif	33	19	2220.25	94.2605	9
b AP.tif	34	1	2269.34	100	0
b AP.tif	34	2	2275.16	100.257	0.5
b AP.tif	34	3	2295.31	101.145	1
b AP.tif	34	4	2265.56	99.8332	1.5
b AP.tif	34	5	2276.97	100.336	2
b AP.tif	34	6	2281.07	100.517	2.5
b AP.tif	34	7	2283.64	100.63	3
b AP.tif	34	8	2274.88	100.244	3.5
d.tif	34	9	1914.53	84.3652	4
d.tif	34	10	1898.86	83.6747	4.5
d.tif	34	11	1899.1	83.6851	5
d.tif	34	12	1899.98	83.7237	5.5
d.tif	34	13	1896.54	83.5724	6
d.tif	34	14	1891.37	83.3446	6.5
d.tif	34	15	1889.22	83.2497	7
d.tif	34	16	1896.67	83.5778	7.5
d.tif	34	17	1883.68	83.0057	8
d.tif	34	18	1888.16	83.203	8.5
d.tif	34	19	1888.32	83.2101	9
b AP.tif	35	1	2008.64	100	0
b AP.tif	35	2	1998.96	99.5179	0.5
b AP.tif	35	3	2011.25	100.13	1
b AP.tif	35	4	2003.42	99.7397	1.5
b AP.tif	35	5	2001.87	99.6626	2
b AP.tif	35	6	2004.86	99.8118	2.5
b AP.tif	35	7	2008.79	100.007	3
b AP.tif	35	8	1999.56	99.5477	3.5
d.tif	35	9	1692.55	84.2635	4
d.tif	35	10	1683.34	83.8049	4.5
d.tif	35	11	1678.94	83.586	5
d.tif	35	12	1668.78	83.0801	5.5
d.tif	35	13	1672.64	83.272	6
d.tif	35	14	1673.59	83.3196	6.5
d.tif	35	15	1666.43	82.9629	7
d.tif	35	16	1671.95	83.238	7.5
d.tif	35	17	1668.87	83.0846	8
d.tif	35	18	1668.62	83.0718	8.5
d.tif	35	19	1662.85	82.785	9
b AP.tif	36	1	1637.41	100	0
b AP.tif	36	2	1648.62	100.684	0.5
b AP.tif	36	3	1641.95	100.277	1
b AP.tif	36	4	1643.68	100.382	1.5
b AP.tif	36	5	1645.28	100.48	2
b AP.tif	36	6	1648.19	100.658	2.5
b AP.tif	36	7	1636.87	99.9667	3
b AP.tif	36	8	1648.22	100.66	3.5
d.tif	36	9	1378.87	84.2101	4
d.tif	36	10	1364.52	83.3337	4.5
d.tif	36	11	1367.63	83.5235	5
d.tif	36	12	1369.07	83.612	5.5
d.tif	36	13	1359.14	83.0055	6
d.tif	36	14	1362.03	83.182	6.5
d.tif	36	15	1361.33	83.139	7
d.tif	36	16	1364.78	83.35	7.5
d.tif	36	17	1362.68	83.2214	8
d.tif	36	18	1356.52	82.8455	8.5
d.tif	36	19	1358.8	82.9847	9
b AP.tif	37	1	3431.27	100	0
b AP.tif	37	2	3419.98	99.671	0.5
b AP.tif	37	3	3431.13	99.996	1
b AP.tif	37	4	3407.88	99.3185	1.5
b AP.tif	37	5	3422.39	99.7414	2
b AP.tif	37	6	3411.17	99.4144	2.5
b AP.tif	37	7	3428.46	99.9183	3
b AP.tif	37	8	3433.14	100.054	3.5
d.tif	37	9	2790.17	81.3161	4
d.tif	37	10	2767.58	80.6577	4.5
d.tif	37	11	2763.01	80.5244	5
d.tif	37	12	2755.64	80.3097	5.5
d.tif	37	13	2760.4	80.4485	6
d.tif	37	14	2755.3	80.2997	6.5
d.tif	37	15	2745.43	80.0121	7
d.tif	37	16	2750.6	80.1629	7.5
d.tif	37	17	2757.66	80.3685	8
d.tif	37	18	2750.24	80.1522	8.5
d.tif	37	19	2748.96	80.1151	9
b AP.tif	38	1	2391.86	100	0
b AP.tif	38	2	2385.81	99.747	0.5
b AP.tif	38	3	2397.48	100.235	1
b AP.tif	38	4	2387.15	99.8029	1.5
b AP.tif	38	5	2383.3	99.6419	2
b AP.tif	38	6	2403.27	100.477	2.5
b AP.tif	38	7	2383.37	99.645	3
b AP.tif	38	8	2391.16	99.9707	3.5
d.tif	38	9	1980.92	82.8193	4
d.tif	38	10	1965.78	82.1863	4.5
d.tif	38	11	1967.12	82.2422	5
d.tif	38	12	1966.29	82.2076	5.5
d.tif	38	13	1966.41	82.2125	6
d.tif	38	14	1966.96	82.2357	6.5
d.tif	38	15	1956.13	81.7828	7
d.tif	38	16	1965.62	82.1794	7.5
d.tif	38	17	1958.07	81.864	8
d.tif	38	18	1962.54	82.0507	8.5
d.tif	38	19	1955.68	81.764	9
b AP.tif	39	1	3136.95	100	0
b AP.tif	39	2	3124.9	99.616	0.5
b AP.tif	39	3	3135.14	99.9423	1
b AP.tif	39	4	3118.72	99.4188	1.5
b AP.tif	39	5	3146.29	100.298	2
b AP.tif	39	6	3120.6	99.4786	2.5
b AP.tif	39	7	3125.74	99.6425	3
b AP.tif	39	8	3120.93	99.4893	3.5
d.tif	39	9	2567.68	81.8526	4
d.tif	39	10	2551.95	81.3513	4.5
d.tif	39	11	2544.84	81.1247	5
d.tif	39	12	2541.27	81.0109	5.5
d.tif	39	13	2532.97	80.7461	6
d.tif	39	14	2530.34	80.6623	6.5
d.tif	39	15	2525.14	80.4967	7
d.tif	39	16	2532.45	80.7297	7.5
d.tif	39	17	2527.95	80.5861	8
d.tif	39	18	2521.78	80.3896	8.5
d.tif	39	19	2521.34	80.3756	9
b AP.tif	40	1	859.305	100	0		5.89775
b AP.tif	40	2	850.533	98.9792	0.5
b AP.tif	40	3	839.731	97.7222	1
b AP.tif	40	4	852.531	99.2117	1.5
b AP.tif	40	5	856.308	99.6512	2
b AP.tif	40	6	848.795	98.7769	2.5
b AP.tif	40	7	833.823	97.0346	3
b AP.tif	40	8	852.938	99.2591	3.5
d.tif	40	9	836.286	97.3212	4
d.tif	40	10	837.574	97.4711	4.5
d.tif	40	11	833.053	96.945	5
d.tif	40	12	831.035	96.7101	5.5
d.tif	40	13	828.735	96.4425	6
d.tif	40	14	827.792	96.3327	6.5
d.tif	40	15	827.562	96.306	7
d.tif	40	16	836.76	97.3763	7.5
d.tif	40	17	833.167	96.9582	8
d.tif	40	18	824.236	95.919	8.5
d.tif	40	19	826.195	96.1469	9
b AP.tif	41	1	2322.12	100	0
b AP.tif	41	2	2335.06	100.557	0.5
b AP.tif	41	3	2341.11	100.818	1
b AP.tif	41	4	2339.25	100.738	1.5
b AP.tif	41	5	2349.92	101.197	2
b AP.tif	41	6	2335.61	100.581	2.5
b AP.tif	41	7	2331.13	100.388	3
b AP.tif	41	8	2354.06	101.376	3.5
d.tif	41	9	1945.25	83.7705	4
d.tif	41	10	1928.51	83.0495	4.5
d.tif	41	11	1921.37	82.7423	5
d.tif	41	12	1914.88	82.4627	5.5
d.tif	41	13	1914.54	82.4483	6
d.tif	41	14	1915.56	82.4922	6.5
d.tif	41	15	1906.01	82.0806	7
d.tif	41	16	1911.06	82.2981	7.5
d.tif	41	17	1907.54	82.1465	8
d.tif	41	18	1911.77	82.3286	8.5
d.tif	41	19	1911.2	82.3042	9
b AP.tif	42	1	2009.08	100	0
b AP.tif	42	2	2009.26	100.009	0.5
b AP.tif	42	3	2003.19	99.7071	1
b AP.tif	42	4	2002.23	99.6592	1.5
b AP.tif	42	5	2005.28	99.8112	2
b AP.tif	42	6	1998.84	99.4904	2.5
b AP.tif	42	7	2001.15	99.6055	3
b AP.tif	42	8	2006.88	99.8908	3.5
d.tif	42	9	1686.9	83.9639	4
d.tif	42	10	1676.6	83.4512	4.5
d.tif	42	11	1671.78	83.2115	5
d.tif	42	12	1673.85	83.3145	5.5
d.tif	42	13	1664.63	82.8556	6
d.tif	42	14	1673.73	83.3084	6.5
d.tif	42	15	1663.4	82.7945	7
d.tif	42	16	1670.04	83.1247	7.5
d.tif	42	17	1667.31	82.9888	8
d.tif	42	18	1671.94	83.2194	8.5
d.tif	42	19	1652.77	82.2653	9
b AP.tif	43	1	2252.43	100	0
b AP.tif	43	2	2242.64	99.5652	0.5
b AP.tif	43	3	2242.02	99.5377	1
b AP.tif	43	4	2232.09	99.097	1.5
b AP.tif	43	5	2234.05	99.184	2
b AP.tif	43	6	2233.99	99.1813	2.5
b AP.tif	43	7	2218.65	98.5005	3
b AP.tif	43	8	2238.07	99.3627	3.5
d.tif	43	9	1841.5	81.7564	4
d.tif	43	10	1818.55	80.7371	4.5
d.tif	43	11	1807.22	80.2342	5
d.tif	43	12	1806.64	80.2086	5.5
d.tif	43	13	1810.17	80.3652	6
d.tif	43	14	1802.2	80.0112	6.5
d.tif	43	15	1794.5	79.6695	7
d.tif	43	16	1800.06	79.9163	7.5
d.tif	43	17	1797.41	79.7986	8
d.tif	43	18	1796.6	79.7626	8.5
d.tif	43	19	1800.58	79.9396	9
b AP.tif	44	1	1710.49	100	0
b AP.tif	44	2	1704.68	99.6604	0.5
b AP.tif	44	3	1722.41	100.697	1
b AP.tif	44	4	1713.4	100.17	1.5
b AP.tif	44	5	1702.12	99.5106	2
b AP.tif	44	6	1720.49	100.585	2.5
b AP.tif	44	7	1701.53	99.4759	3
b AP.tif	44	8	1706.39	99.7603	3.5
d.tif	44	9	1446.21	84.5492	4
d.tif	44	10	1446.37	84.5586	4.5
d.tif	44	11	1434.93	83.8897	5
d.tif	44	12	1437.46	84.0376	5.5
d.tif	44	13	1436.97	84.0093	6
d.tif	44	14	1424.04	83.2535	6.5
d.tif	44	15	1436.81	84.0001	7
d.tif	44	16	1438.22	84.0821	7.5
d.tif	44	17	1428.14	83.4927	8
d.tif	44	18	1430.36	83.6228	8.5
d.tif	44	19	1428.43	83.5098	9
b AP.tif	45	1	2740.86	100	0
b AP.tif	45	2	2732.3	99.6875	0.5
b AP.tif	45	3	2754.87	100.511	1
b AP.tif	45	4	2741.59	100.027	1.5
b AP.tif	45	5	2748	100.26	2
b AP.tif	45	6	2734.05	99.7516	2.5
b AP.tif	45	7	2735.46	99.8028	3
b AP.tif	45	8	2747.69	100.249	3.5
d.tif	45	9	2314.77	84.4543	4
d.tif	45	10	2302.54	84.008	4.5
d.tif	45	11	2310.77	84.308	5
d.tif	45	12	2293.23	83.6682	5.5
d.tif	45	13	2301.3	83.9627	6
d.tif	45	14	2290.7	83.5758	6.5
d.tif	45	15	2285.85	83.399	7
d.tif	45	16	2293.21	83.6673	7.5
d.tif	45	17	2284.42	83.3467	8
d.tif	45	18	2284.09	83.3349	8.5
d.tif	45	19	2291.31	83.5983	9
b AP.tif	46	1	2101.55	100	0
b AP.tif	46	2	2099.63	99.9086	0.5
b AP.tif	46	3	2113.16	100.552	1
b AP.tif	46	4	2108.71	100.341	1.5
b AP.tif	46	5	2098.93	99.8752	2
b AP.tif	46	6	2099.75	99.9145	2.5
b AP.tif	46	7	2099.89	99.9211	3
b AP.tif	46	8	2098.83	99.8706	3.5
d.tif	46	9	1826.46	86.91	4
d.tif	46	10	1811.68	86.2066	4.5
d.tif	46	11	1814.72	86.3513	5
d.tif	46	12	1815.24	86.3764	5.5
d.tif	46	13	1802.4	85.7651	6
d.tif	46	14	1802.51	85.7707	6.5
d.tif	46	15	1790.53	85.2004	7
d.tif	46	16	1795.45	85.4348	7.5
d.tif	46	17	1803.24	85.8051	8
d.tif	46	18	1797.16	85.5157	8.5
d.tif	46	19	1795.77	85.4498	9
b AP.tif	47	1	1619.08	100	0
b AP.tif	47	2	1627.71	100.534	0.5
b AP.tif	47	3	1614.05	99.6896	1
b AP.tif	47	4	1619.89	100.051	1.5
b AP.tif	47	5	1620.88	100.111	2
b AP.tif	47	6	1604.98	99.1293	2.5
b AP.tif	47	7	1615.92	99.805	3
b AP.tif	47	8	1618.92	99.9901	3.5
d.tif	47	9	1409.28	87.0425	4
d.tif	47	10	1391.32	85.933	4.5
d.tif	47	11	1393.72	86.0814	5
d.tif	47	12	1389.92	85.8462	5.5
d.tif	47	13	1387.54	85.6997	6
d.tif	47	14	1378.56	85.1447	6.5
d.tif	47	15	1384.63	85.5197	7
d.tif	47	16	1388.18	85.7391	7.5
d.tif	47	17	1386.26	85.6207	8
d.tif	47	18	1379.99	85.2333	8.5
d.tif	47	19	1382.64	85.3971	9
b AP.tif	48	1	2686.94	100	0
b AP.tif	48	2	2704.79	100.664	0.5
b AP.tif	48	3	2705.39	100.687	1
b AP.tif	48	4	2684.25	99.9	1.5
b AP.tif	48	5	2693.75	100.254	2
b AP.tif	48	6	2683.57	99.8747	2.5
b AP.tif	48	7	2692.26	100.198	3
b AP.tif	48	8	2692.6	100.211	3.5
d.tif	48	9	2262.91	84.2188	4
d.tif	48	10	2256.53	83.9815	4.5
d.tif	48	11	2258.97	84.0724	5
d.tif	48	12	2252.92	83.847	5.5
d.tif	48	13	2258.89	84.0694	6
d.tif	48	14	2255.3	83.9356	6.5
d.tif	48	15	2248.12	83.6684	7
d.tif	48	16	2260.78	84.1396	7.5
d.tif	48	17	2254.8	83.9171	8
d.tif	48	18	2255.46	83.9417	8.5
d.tif	48	19	2247.86	83.6588	9

## Sheet: geom
	d	r					40.49
1	16.54	8.27	2369.22			1	2241.81
2	15.62	7.81	1995.45			2	1960.17
3	17.37	8.685	2744.09			3	2403.03
4	20.39	10.195	4438.64			4	3979.37
5	14.57	7.285	1619.49			5	2514.89
6	15.49	7.745	1946.04			6	2111.14
7	16.04	8.02	2160.79			7	2344.12
8	14.5	7.25	1596.26			8	1655.92
9						9
10	14.02	7.01	1442.92			10	1570.1
11	15.22	7.61	1846.05			11	1796.2
12	15.09	7.545	1799.15			12	1799.77
13	20.53	10.265	4530.7			13	4000.73
14						14	2266.36
15	17.19	8.595	2659.66			15	2918.04
16	14.7	7.35	1663.22			16	2046.93
17						17
18	15.56	7.78	1972.55			18	2250.44
19	16.05	8.025	2164.83			19	2488.9
20	16.8	8.4	2482.71			20	2789.97
21	14.94	7.47	1746.02			21	1692.96
22						22
23	15.23	7.615	1849.69			23	1855.02
24	15.63	7.815	1999.29			24	2147.22
25	16.31	8.155	2271.75			25	2387.27
26						26
27	14.73	7.365	1673.43			27	1948.49
28	16.8	8.4	2482.71			28	2562.81
29	17.29	8.645	2706.35			29	2966.81
	if confinement is		11.21		v
			r	5.605	737.591

## Sheet: ricm
		area
1
2
3	p3_w3ricm_t1.TIF	108.687
4	p3_w3ricm_t1.TIF	170.466
5
6	p3_w3ricm_t1.TIF	72.804
7
8
9
10
11
12
13
14
15
16
17
18
19
20
21
22
23
24
25	p3_w3ricm_t1.TIF	110.767
26
27	p3_w3ricm_t1.TIF	70.204
28	p3_w3ricm_t1.TIF	99.326
29	p3_w3ricm_t1.TIF	141.553
30	p3_w3ricm_t1.TIF	152.161
31
32
33
34
35
36	p3_w3ricm_t1.TIF	47.531
37	p3_w3ricm_t1.TIF	138.64
38	p3_w3ricm_t1.TIF	69.892
39	p3_w3ricm_t1.TIF	148.417
40
41	p3_w3ricm_t1.TIF	71.972
42	p3_w3ricm_t1.TIF	75.093
43	p3_w3ricm_t1.TIF	72.908
44	p3_w3ricm_t1.TIF	81.125
45
46
47
48	p3_w3ricm_t1.TIF	115.135

## Sheet: inten over time
before
big				small				background
b.tif	9299.95	100		b.tif	15471.2	100		b.tif	15057.2	100		1
b.tif	9298.17	99.9809		b.tif	15461.8	99.9396		b.tif	15044.1	99.9135		2
b.tif	9287.05	99.8613		b.tif	15439.3	99.7938		b.tif	15024.8	99.7848		3
b.tif	9309.82	100.106		b.tif	15465.8	99.9652		b.tif	15040.9	99.8918		4
b.tif	9279.29	99.7779		b.tif	15437.2	99.7803		b.tif	15005.2	99.6546		5
b.tif	9284.92	99.8384		b.tif	15434.7	99.7642		b.tif	15001.8	99.6322		6
b.tif	9284.13	99.8299		b.tif	15407.6	99.589		b.tif	14997.3	99.6026		7
b.tif	9280.56	99.7916		b.tif	15407.5	99.5884		b.tif	14988.7	99.5452		8
during
d.tif	1470.01	100		d.tif	5423.77	100		d.tif	6160.99	100		9
d.tif	1103.89	75.0945		d.tif	5013.84	92.442		d.tif	5764.19	93.5593		10
d.tif	954.289	64.9173		d.tif	4846.68	89.3601		d.tif	5599.66	90.889		11
d.tif	867.046	58.9824		d.tif	4744.75	87.4807		d.tif	5499.43	89.2621		12
d.tif	808.692	55.0128		d.tif	4682.86	86.3397		d.tif	5426.57	88.0794		13
d.tif	765.129	52.0493		d.tif	4630	85.365		d.tif	5378.11	87.2928		14
d.tif	728.282	49.5428		d.tif	4586.79	84.5684		d.tif	5340.98	86.6902		15
d.tif	704.94	47.9549		d.tif	4555.21	83.986		d.tif	5299.31	86.014		16
d.tif	678.865	46.1811		d.tif	4528.26	83.4892		d.tif	5266.48	85.481		17
d.tif	658.864	44.8205		d.tif	4505.5	83.0696		d.tif	5243.72	85.1116		18
d.tif	641.276	43.624		d.tif	4483.88	82.6708		d.tif	5217.68	84.6889		19

## Sheet: Sheet2
	Vi	Vf		deltaV	deltaV%	contact area	Ri	Si		847.601
1	2241.81	2080.18	92.7902	161.631	7.20984		8.11902	828.356		16.238										11.21	2080.18		11.21
2	1960.17	1763.44	89.9638	196.727	10.0362		7.76369	757.436		15.5274										11.21	1763.44		11.21
3	2403.03	2177.56	90.6172	225.471	9.3828	108.687	8.30916	867.608		16.6183										11.21	2177.56		11.21	108.687
4	3979.37	3456.23	86.8536	523.143	13.1464	170.466	9.83049	1214.4		19.661										11.21	3456.23		11.21	170.466
5	2514.89	1924.91	76.5405	589.979	23.4595		8.43613	894.327		16.8723										11.21	1924.91		11.21
6	2111.14	1856.79	87.9519	254.352	12.0481	72.804	7.9581	795.845		15.9162										11.21	1856.79		11.21	72.804
7	2344.12	2077.9	88.6435	266.21	11.3565		8.24069	853.369		16.4814										11.21	2077.9		11.21
8	1655.92	1448.5	87.4739	207.423	12.5261		7.33922	676.877		14.6784										11.21	1448.5		11.21
9	1986.15	1718.21	86.5097	267.939	13.4903		7.79785	764.116		15.5957										11.21	1718.21		11.21
10	1570.1	1347.5	85.8225	222.6	14.1775		7.21018	653.284		14.4204										11.21	1347.5		11.21
11	1796.2	1634.44	90.9943	161.76	9.00567		7.54088	714.585		15.0818										11.21	1634.44		11.21
12	1799.77	1644.25	91.3586	155.526	8.64144		7.54588	715.533		15.0918										11.21	1644.25		11.21
13	4000.73	3539.34	88.4673	461.391	11.5327		9.84805	1218.74		19.6961										11.21	3539.34		11.21
14	2266.36	1997.62	88.1421	268.743	11.8579		8.14855	834.393		16.2971										11.21	1997.62		11.21
15	2918.04	2496.1	85.5401	421.945	14.4599		8.86477	987.518		17.7295										11.21	2496.1		11.21
16	2046.93	1796.7	87.7752	250.233	12.2248		7.87659	779.626		15.7532										11.21	1796.7		11.21
17	3317.32	3058.08	92.1854	259.236	7.81462		9.25194	1075.66		18.5039										11.21	3058.08		11.21
18	2250.44	2061.27	91.5938	189.176	8.40617		8.12943	830.481		16.2589										11.21	2061.27		11.21
19	2488.9	2218.31	89.1281	270.591	10.8719		8.40698	888.156		16.814										11.21	2218.31		11.21
20	2789.97	2461.62	88.2311	328.348	11.7689		8.73314	958.408		17.4663										11.21	2461.62		11.21
21	1692.96	1439.37	85.0205	253.597	14.9795		7.39355	686.935		14.7871										11.21	1439.37		11.21
22	3671.38	3066.44	83.5227	604.944	16.4773		9.57004	1150.9		19.1401										11.21	3066.44		11.21
23	1855.02	1612.39	86.9205	242.627	13.0795		7.62231	730.102		15.2446										11.21	1612.39		11.21
24	2147.22	1841.79	85.7755	305.43	14.2245		8.00318	804.887		16.0064										11.21	1841.79		11.21
25	2387.27	1998.64	83.7209	388.626	16.2791	110.767	8.29095	863.809		16.5819										11.21	1998.64		11.21	110.767
26	2860.84	2415.31	84.4267	445.527	15.5733		8.80646	974.57		17.6129										11.21	2415.31		11.21
27	1948.49	1637.19	84.0236	311.299	15.9764	70.204	7.74824	754.425		15.4965										11.21	1637.19		11.21	70.204
28	2562.81	2057.93	80.2997	504.882	19.7003	99.326	8.48938	905.653		16.9788										11.21	2057.93		11.21	99.326
29	2966.81	2468.49	83.2034	498.325	16.7966	141.553	8.91389	998.491		17.8278										11.21	2468.49		11.21	141.553
30	2812.1	2342.79	83.3111	469.31	16.6889	152.161	8.75617	963.47		17.5123										11.21	2342.79		11.21	152.161
31	1590.16	1558.58	98.0136	31.5865	1.98637		7.24077	658.838		14.4815										11.21	1558.58		11.21
32	2248.26	1890.16	84.0721	358.101	15.9279		8.1268	829.944		16.2536										11.21	1890.16		11.21
33	2355.44	2214.09	93.9988	141.356	6.00124		8.25394	856.115		16.5079										11.21	2214.09		11.21
34	2269.34	1914.53	84.3652	354.808	15.6348		8.15212	835.123		16.3042										11.21	1914.53		11.21
35	2008.64	1692.55	84.2635	316.091	15.7365		7.82717	769.873		15.6543										11.21	1692.55		11.21
36	1637.41	1378.87	84.2101	258.545	15.7899	47.531	7.31178	671.825		14.6236										11.21	1378.87		11.21	47.531
37	3431.27	2790.17	81.3161	641.095	18.6839	138.64	9.35668	1100.15		18.7134										11.21	2790.17		11.21	138.64
38	2391.86	1980.92	82.8193	410.938	17.1807	69.892	8.29626	864.917		16.5925										11.21	1980.92		11.21	69.892
39	3136.95	2567.68	81.8526	569.276	18.1474	148.417	9.08113	1036.31		18.1623										11.21	2567.68		11.21	148.417
40	859.305	836.286	97.3212	23.0194	2.67884		5.89775	437.102		11.7955										11.21	836.286		11.21
41	2322.12	1945.25	83.7705	376.868	16.2295	71.972	8.21483	848.021		16.4297										11.21	1945.25		11.21	71.972
42	2009.08	1686.9	83.9639	322.177	16.0361	75.093	7.82773	769.984		15.6555										11.21	1686.9		11.21	75.093
43	2252.43	1841.5	81.7564	410.925	18.2436	72.908	8.13182	830.969		16.2636										11.21	1841.5		11.21	72.908
44	1710.49	1446.21	84.5492	264.284	15.4508	81.125	7.41898	691.668		14.838										11.21	1446.21		11.21	81.125
45	2740.86	2314.77	84.4543	426.087	15.5457		8.68159	947.128		17.3632										11.21	2314.77		11.21
46	2101.55	1826.46	86.91	275.093	13.09		7.94603	793.434		15.8921										11.21	1826.46		11.21
47	1619.08	1409.28	87.0425	209.792	12.9575		7.28438	666.8		14.5688										11.21	1409.28		11.21
48	2686.94	2262.91	84.2188	424.032	15.7812	115.135	8.62428	934.665		17.2486										11.21	2262.91		11.21	115.135
					13.4228
					4.14525

## Sheet: Sheet3
11.21	2177.56		11.21	108.687
11.21	3456.23		11.21	170.466
11.21	1856.79		11.21	72.804
11.21	1998.64		11.21	110.767
11.21	1637.19		11.21	70.204
11.21	2057.93		11.21	99.326
11.21	2468.49		11.21	141.553
11.21	2342.79		11.21	152.161
11.21	1378.87		11.21	47.531
11.21	2790.17		11.21	138.64
11.21	1980.92		11.21	69.892
11.21	2567.68		11.21	148.417
11.21	1945.25		11.21	71.972
11.21	1686.9		11.21	75.093
11.21	1841.5		11.21	72.908
11.21	1446.21		11.21	81.125
11.21	2262.91		11.21	115.135

## Sheet: average %
t, s
0	100	100	100	100	100	100	100	100	100	100	100	100	100	100	100	100	100	100	100	100	100	100	100	100	100	100	100	100	100	100	100	100	100	100	100	100	100	100	100	100	100	100	100	100	100	100	100	100
0.5	100.188	99.4023	100.016	99.6196	100.015	100.381	99.5417	99.6192	99.6392	99.6047	99.8733	99.5237	99.8026	99.4573	99.9682	100.044	99.9395	100.039	100.326	99.5799	100.599	99.9738	99.6869	99.5367	99.7571	100.444	100.266	99.8489	99.5823	100.763	99.0352	100.556	99.6272	100.257	99.5179	100.684	99.671	99.747	99.616	98.9792	100.557	100.009	99.5652	99.6604	99.6875	99.9086	100.534	100.664
1	99.9631	99.6646	99.7799	99.9466	100.287	100.106	99.979	100.292	100.715	100.537	100.329	99.8504	99.7796	99.7461	100.21	100.471	99.9507	99.7243	100.83	99.6224	99.5923	99.6931	100.117	100.774	99.0363	100.2	99.6285	99.7469	99.4647	100.378	99.2657	100.303	99.096	101.145	100.13	100.277	99.996	100.235	99.9423	97.7222	100.818	99.7071	99.5377	100.697	100.511	100.552	99.6896	100.687
1.5	100.073	98.932	99.8399	98.7138	100.107	99.8382	100.018	98.9815	100.067	99.2912	99.527	99.9414	99.7914	99.8703	99.8935	99.6894	100.06	99.2771	100.095	98.9377	99.7214	99.8072	99.856	98.7062	98.8304	100.06	99.8199	99.8258	99.557	99.9768	99.3099	99.9675	99.3198	99.8332	99.7397	100.382	99.3185	99.8029	99.4188	99.2117	100.738	99.6592	99.097	100.17	100.027	100.341	100.051	99.9
2	99.4459	99.1106	99.4015	99.4567	100.401	99.7098	99.9191	100.11	99.4539	100.203	100.156	99.5278	99.734	100.419	99.7866	99.8386	99.9871	99.6038	100.353	99.7364	99.7015	99.8517	100.215	99.7495	99.343	99.9648	99.6341	100.282	99.5418	100.388	99.2736	100.126	98.6318	100.336	99.6626	100.48	99.7414	99.6419	100.298	99.6512	101.197	99.8112	99.184	99.5106	100.26	99.8752	100.111	100.254
2.5	99.6281	98.7906	99.3814	98.9197	99.9188	99.3193	99.0009	98.9357	99.5444	99.9566	99.376	99.7537	99.1374	99.5365	99.5799	100.322	99.9575	99.8734	100.301	99.6267	100.24	99.1168	99.4168	99.2972	98.3803	100.274	99.5612	99.1846	99.4625	100.228	98.812	99.6473	99.5465	100.517	99.8118	100.658	99.4144	100.477	99.4786	98.7769	100.581	99.4904	99.1813	100.585	99.7516	99.9145	99.1293	99.8747
3	99.8601	98.4015	99.6976	99.1762	99.9966	99.6073	99.0966	100.244	99.2803	99.2842	99.3007	99.7216	99.4871	100.308	99.6682	99.9974	100.065	99.539	100.454	99.0229	99.768	99.332	100.226	99.0375	98.743	99.8525	99.973	99.6299	99.4316	100.311	98.5895	100.1	99.3302	100.63	100.007	99.9667	99.9183	99.645	99.6425	97.0346	100.388	99.6055	98.5005	99.4759	99.8028	99.9211	99.805	100.198
3.5	100.397	98.9656	99.6093	99.4218	99.9641	99.6169	99.8939	100.189	100.384	99.7152	100.127	99.0489	99.4932	100.01	99.624	99.3757	99.3853	98.9667	99.6201	99.2757	99.1425	99.2493	99.8464	99.315	99.2128	100.145	99.8198	99.1957	99.1336	100.122	98.5543	99.198	99.3391	100.244	99.5477	100.66	100.054	99.9707	99.4893	99.2591	101.376	99.8908	99.3627	99.7603	100.249	99.8706	99.9901	100.211
4	92.7902	89.9638	90.6172	86.8536	76.5405	87.9519	88.6435	87.4739	86.5097	85.8225	90.9943	91.3586	88.4673	88.1421	85.5401	87.7752	92.1854	91.5938	89.1281	88.2311	85.0205	83.5227	86.9205	85.7755	83.7209	84.4267	84.0236	80.2997	83.2034	83.3111	98.0136	84.0721	93.9988	84.3652	84.2635	84.2101	81.3161	82.8193	81.8526	97.3212	83.7705	83.9639	81.7564	84.5492	84.4543	86.91	87.0425	84.2188
4.5	92.8896	90.1332	89.9418	86.6345	75.7704	87.6803	88.4674	87.6064	86.2729	85.6919	91.1222	91.4352	88.5035	88.1912	85.2568	87.3291	92.2235	91.9767	89.2183	88.6035	84.8706	83.5542	86.0941	85.27	83.1395	83.9308	83.7317	79.9009	82.3818	82.9936	98.3153	84.0981	94.0035	83.6747	83.8049	83.3337	80.6577	82.1863	81.3513	97.4711	83.0495	83.4512	80.7371	84.5586	84.008	86.2066	85.933	83.9815
5	92.9352	90.0036	89.6664	86.5587	75.6784	87.1997	87.9773	87.5762	86.5106	85.0554	91.0743	92.0125	88.6017	87.9323	85.4154	87.4484	92.402	91.8301	89.0142	88.4127	84.6649	83.2646	86.6401	85.4839	83.1902	83.776	83.4769	79.693	82.1784	82.5743	98.0832	83.5833	93.8162	83.6851	83.586	83.5235	80.5244	82.2422	81.1247	96.945	82.7423	83.2115	80.2342	83.8897	84.308	86.3513	86.0814	84.0724
5.5	92.9543	90.1169	89.4073	86.4093	75.5739	87.2778	87.687	87.4306	86.363	85.3345	90.6533	91.7608	88.4551	87.4992	85.354	87.3467	92.3735	91.9433	88.9478	88.4037	84.5031	83.0812	86.541	85.6435	83.1705	83.488	83.3456	79.411	82.0874	82.1244	98.5966	83.652	94.2131	83.7237	83.0801	83.612	80.3097	82.2076	81.0109	96.7101	82.4627	83.3145	80.2086	84.0376	83.6682	86.3764	85.8462	83.847
6	92.8553	89.9114	89.4914	86.416	74.827	86.7863	87.7745	87.3676	86.1562	85.5987	90.7617	91.8627	88.6039	87.9077	85.1927	87.8585	92.2344	91.741	89.4191	88.4935	84.9853	83.0859	86.0647	85.3779	82.9751	83.531	83.1587	79.1374	81.8757	82.1379	98.4406	83.451	94.0912	83.5724	83.272	83.0055	80.4485	82.2125	80.7461	96.4425	82.4483	82.8556	80.3652	84.0093	83.9627	85.7651	85.6997	84.0694
6.5	93.4929	89.7743	89.0224	86.4764	75.0643	86.9491	87.4181	87.1164	85.7546	84.9543	90.9214	91.9854	88.639	87.6546	84.9141	87.5331	92.8099	92.0757	89.1365	88.2587	84.3528	83.1193	86.2798	85.4789	83.1379	83.232	82.8766	79.1604	82.2009	82.0557	98.3104	83.3555	93.7987	83.3446	83.3196	83.182	80.2997	82.2357	80.6623	96.3327	82.4922	83.3084	80.0112	83.2535	83.5758	85.7707	85.1447	83.9356
7	92.8907	89.9356	89.2836	86.2768	74.6343	86.5845	87.7349	87.4634	85.9129	84.802	91.0084	91.8751	88.6628	87.9763	84.9623	87.7588	92.4275	91.9257	89.3094	88.4688	84.6769	82.9963	85.9858	85.1218	82.6512	83.4219	82.8595	78.7165	81.7271	82.0126	98.7321	83.1434	93.8249	83.2497	82.9629	83.139	80.0121	81.7828	80.4967	96.306	82.0806	82.7945	79.6695	84.0001	83.399	85.2004	85.5197	83.6684
7.5	92.9147	89.4247	89.4212	86.514	74.7323	86.8083	87.4298	87.8336	86.3659	85.1904	91.0076	91.8761	88.7384	87.9229	85.0869	87.4759	92.6297	92.0724	89.1019	88.305	84.3726	83.0632	86.7846	85.426	82.6222	83.1472	82.9774	79.2692	81.7914	81.8586	98.39	83.3452	93.7739	83.5778	83.238	83.35	80.1629	82.1794	80.7297	97.3763	82.2981	83.1247	79.9163	84.0821	83.6673	85.4348	85.7391	84.1396
8	93.3634	90.0462	89.0342	86.4044	74.987	87.1995	87.1222	87.5052	85.9381	84.7705	91.349	92.1483	88.6152	87.681	84.8111	87.4712	93.011	92.2716	88.9634	88.1923	84.4412	83.0014	86.4308	85.3659	82.6594	82.9464	83.4177	79.0874	81.8708	81.7338	98.7776	83.3292	94.0597	83.0057	83.0846	83.2214	80.3685	81.864	80.5861	96.9582	82.1465	82.9888	79.7986	83.4927	83.3467	85.8051	85.6207	83.9171
8.5	93.229	90.2923	89.0852	86.2209	74.3096	86.5057	87.1484	87.1346	86.0194	84.8591	90.9627	91.9098	88.7461	87.6806	85.11	87.501	92.5092	92.311	89.2542	88.421	84.0059	82.6778	85.8139	85.3848	82.7894	82.8989	82.9391	78.7109	82.1255	81.9409	98.9604	83.0849	94.1682	83.203	83.0718	82.8455	80.1522	82.0507	80.3896	95.919	82.3286	83.2194	79.7626	83.6228	83.3349	85.5157	85.2333	83.9417
9	92.8084	90.0534	88.9329	86.1794	74.386	86.1467	87.381	87.3008	86.1548	85.0372	91.2459	91.898	88.8317	87.845	85.1923	87.6762	92.4949	92.0122	89.3479	88.6817	84.6664	82.7906	85.9249	85.0537	82.538	83.1172	82.9298	78.6581	81.7902	82.0122	98.8374	83.0302	94.2605	83.2101	82.785	82.9847	80.1151	81.764	80.3756	96.1469	82.3042	82.2653	79.9396	83.5098	83.5983	85.4498	85.3971	83.6588
[truncated: 5 more columns]
