# Supplementary material for: A mechano-osmotic feedback couples cell volume to the rate of cell deformation
Source: eLife journal article supplement (doi:10.7554/elife.72381), 2022-04-13
Supplement: supp [file control_dVdt_dAdt.xlsx]

## Sheet: Sheet1
experiment	position	cell	Vi (µm3)	Si (µm2)	t of max V loss (min)	deltaV% at t of V loss	minus deltaV% at t of V loss	deltaV (µm3)	minus deltaV (µm3)	A at t of V loss (µm2)	t of hemisphere transition (min)	deltaV% at t of transition	Vf	deltaV% at t of transition	A at transition (µm2)	dV/dt i	dA/dt i	n
20180220 hela spreading 20xPA FN RICM 1	3	1	1468.79	624.87	25	10.0524	-10.0524	147.648	-147.648	262.304	17	6.9451	1366.78	7.15549	206.66	-9.55262	8.30579	195
20180220 hela spreading 20xPA FN RICM 1	3	3	2925.37	989.17	40	9.06027	-9.06027	265.046	-265.046	438.594	16	5.85665	2754.04	15.8225	391.272
20180220 hela spreading 20xPA FN RICM 1	3	6	1968.28	759.525	25	6.51538	-6.51538	128.241	-128.241	254.087	22	5.7021	1856.05	5.33731	208.533	-7.84836	6.1033
20180220 hela spreading 20xPA FN RICM 1	3	8	1213.45	550.171	5	3.26239	-3.26239	39.5874	-39.5874	42.019			1213.45			-2.24131	2.51263
20180220 hela spreading 20xPA FN RICM 1	4	1	2410.09	869.307	55	11.3324	-11.3324	273.12	-273.12	466.78	15	5.84345	2269.26	4.58489	232.454	-10.2026	12.2547
20180220 hela spreading 20xPA FN RICM 1	4	3	1638.48	672.116	11	4.41312	-4.41312	72.308	-72.308	53.667	35	-1.59764	1664.65	8.58431	168.698	-6.38204	2.37918
20180220 hela spreading 20xPA FN RICM 1	4	4	1597.72	660.925	33	9.19791	-9.19791	146.957	-146.957	460.748	16	4.81245	1520.83	9.93575	216.125	-4.22402	8.33999
20180220 hela spreading 20xPA FN RICM 1	4	6	2811.4	963.31	16	4.46364	-4.46364	125.491	-125.491	118.983	40	2.52167	2740.51	7.37716	266.048	-7.34656	5.79075
20180220 hela spreading 20xPA FN RICM 1	4	7	2064.79	784.155	33	6.4591	-6.4591	133.367	-133.367	331.26	18	4.71166	1967.51	6.84258	225.174	-6.69694	5.60124
20180220 hela spreading 20xPA FN RICM 1	5	1	1789.43	712.789	8	3.38085	-3.38085	60.498	-60.498	58.139	52	1.26503	1766.8	5.20073	163.186	-2.72167	2.13938
20180220 hela spreading 20xPA FN RICM 1	5	2	2161.32	808.407	27	8.66486	-8.66486	187.276	-187.276	370.262	18	6.67091	2017.14	12.3503	295.274	-9.73111	7.51693
20180220 hela spreading 20xPA FN RICM 1	5	4	1680.04	683.434	24	10.5889	-10.5889	177.897	-177.897	252.111	19	9.37231	1522.58	7.95453	228.502	-9.22462	5.98287
20180220 hela spreading 20xPA FN RICM 1	5	6	2026.2	774.354	7	14.7518	-14.7518	298.902	-298.902	103.07	24	10.033	1822.91	11.4313	290.073	-11.7473	5.53347
20180220 hela spreading 20xPA FN RICM 1	5	7	1452.19	620.153	12	3.20702	-3.20702	46.5719	-46.5719	75.197	37	-4.15553	1512.53	19.1258	232.142	-1.06223	3.27613
20180220 hela spreading 20xPA FN RICM 1	5	10	1554.35	648.91	28	10.6915	-10.6915	166.183	-166.183	349.357	6	4.70349	1481.25	10.1178	213.109	-15.0018	27.1352
20180220 hela spreading 20xPA FN RICM 1	6	4	2507.59	892.595	28	16.4762	-16.4762	413.156	-413.156	712.235	5	2.74615	2438.72	6.02493	230.27	-4.40837	34.5948
20180220 hela spreading 20xPA FN RICM 1	6	5	2074.26	786.549	28	12.8424	-12.8424	266.385	-266.385	351.229	11	6.95156	1930.07	11.9888	285.601	-11.7287	13.3683
20180220 hela spreading 20xPA FN RICM 1	6	6	1215.81	550.884	20	7.36196	-7.36196	89.5071	-89.5071	344.157	28	3.31934	1175.45	12.4915	206.868
20180220 hela spreading 20xPA FN RICM 1	6	8	1420.28	611.035	5	1.06732	-1.06732	15.1589	-15.1589	49.195	36	-7.84669	1531.72	12.3633	156.737	3.64853	8.24252
20180220 hela spreading 20xPA FN RICM 1	6	10	2667.57	930.167	30	9.24647	-9.24647	246.656	-246.656	456.067	8	3.1825	2582.67	11.3314	309.211	-11.2192	20.229
20180220 hela spreading 20xPA FN RICM 1	6	12	2601.67	914.785	23	7.30757	-7.30757	190.119	-190.119	565.274	4	0.303414	2593.78	14.8606	324.083	-7.24667	30.0754
20180220 hela spreading 20xPA FN RICM 1	6	13	1660.94	678.244	27	10.9596	-10.9596	182.032	-182.032	466.468	3	2.38965	1621.25	12.3114	229.646	-16.1283	11.822
20180220 hela spreading 20xPA FN RICM 1	6	14	2234.58	826.574	31	12.2342	-12.2342	273.384	-273.384	461.996	9	4.78257	2127.71	13.1074	299.434	-11.8186	34.6097
20180220 hela spreading 20xPA FN RICM 1	6	15	1531.78	642.613	14	9.09844	-9.09844	139.368	-139.368	266.152	4	1.33228	1511.38	16.3151	241.711	-12.8635	29.7235
20180220 hela spreading 20xPA FN RICM 1	7	1	2183.46	813.918	22	10.4647	-10.4647	228.491	-228.491	501.518	5	2.90108	2120.11	16.8274	317.427	-15.5541	33.5763
20180220 hela spreading 20xPA FN RICM 1	7	2	1430.39	613.932	41	9.13167	-9.13167	130.618	-130.618	202.084	22	6.15164	1342.4	1.6212	135	-6.6191	7.79674
20180220 hela spreading 20xPA FN RICM 1	7	3	1535.57	643.67	40	12.7332	-12.7332	195.527	-195.527	339.06	19	9.79039	1385.23	5.37316	197.716	-6.82667	8.39807
20180220 hela spreading 20xPA FN RICM 1	7	4	1771.58	708.042	12	6.70279	-6.70279	118.746	-118.746	468.756	7	4.48205	1692.18	9.34251	224.862	-14.3195	40.9809
20180220 hela spreading 20xPA FN RICM 1	7	5	1983.87	763.53	21	7.67284	-7.67284	152.219	-152.219	519.927	8	3.87743	1906.95	7.49181	220.805	-8.77177	29.9587
20180220 hela spreading 20xPA FN RICM 1	7	6	1404.36	606.46	2	4.21588	-4.21588	59.206	-59.206	35.31	23	-5.1945	1477.31	13.93	184.403	9.09274	4.69254
20180220 hela spreading 20xPA FN RICM 1	9	1	1947.76	754.236	24	10.388	-10.388	202.333	-202.333	444.003	5	4.09743	1867.95	5.32308	196.052	-9.58537	20.0634
20180220 hela spreading 20xPA FN RICM 1	9	2	2109.67	795.475	36	13.3361	-13.3361	281.348	-281.348	351.957	15	10.0949	1896.7	1.88247	209.781	-12.1662	5.37361
20180220 hela spreading 20xPA FN RICM 1	9	3	1825.97	722.46	43	8.49064	-8.49064	155.037	-155.037	200.836	32	7.59466	1687.3	3.95815	196.052	-3.50544	7.17832
20180220 hela spreading 20xPA FN RICM 1	9	4	1325.94	583.67	57	9.3845	-9.3845	124.433	-124.433	272.756	32	7.42872	1227.44	2.97823	149.145	-1.94343	8.93453
20180220 hela spreading 20xPA FN RICM 1	3	4	1977.95	762.011	12	3.76468	-3.76468	74.4636	-74.4636	239.526	12	0.0797371	1976.37	8.26004	203.748	0.0307241	16.8625
20180220 hela spreading 20xPA FN RICM 1	3	5	1868.34	733.591	34	8.08295	-8.08295	151.017	-151.017	495.07	11	0.779029	1853.78	11.0553	228.918	1.13338	21.4254
20180220 hela spreading 20xPA FN RICM 1	3	7	2039.14	777.645	18	4.89255	-4.89255	99.7657	-99.7657	344.781	13	2.97201	1978.53	10.3445	248.159	-4.30491	13.2407
20180220 hela spreading 20xPA FN RICM 1	3	9	1454.03	620.678	20	5.07771	-5.07771	73.8315	-73.8315	295.69	8	2.10305	1423.45	8.10864	175.667	-4.31304	25.382
20180220 hela spreading 20xPA FN RICM 1	4	9	1703.33	689.737	18	6.90118	-6.90118	117.55	-117.55	271.04	11	4.04506	1634.43	8.37306	208.429	-7.33127	13.4614
20180220 hela spreading 20xPA FN RICM 1	5	3	1781.67	710.725	52	8.05864	-8.05864	143.578	-143.578	397.252	22	3.79403	1714.07	13.7706	258.352	-1.30524	4.16024
20180220 hela spreading 20xPA FN RICM 1	6	1	2682.38	933.609	9	0.550281	-0.550281	14.7607	-14.7607	148.209	43	-2.26757	2743.21	16.5149	333.132	-1.5513	11.2523
20180220 hela spreading 20xPA FN RICM 1	6	2	1756.6	704.043	37	5.5079	-5.5079	96.7518	-96.7518	315.451	23	2.56439	1711.55	17.0369	274.785	0.332133	6.8193
20180220 hela spreading 20xPA FN RICM 1	6	3	2003.2	768.481	25	2.4824	-2.4824	49.7273	-49.7273	311.187	17	1.11392	1980.88	17.2938	295.898	-1.35921	11.8286
20180220 hela spreading 20xPA FN RICM 1	6	11	1601.14	661.866							3	-1.20608	1620.45	16.5659	240.878	7.20844	16.3602
20180220 hela spreading 20xPA FN RICM 1	6	16	1035.45	494.96							11	-12.325	1163.07	24.3194	189.603	12.1897	7.374
20180220 hela spreading 20xPA FN RICM 1	4	5	1352.43	591.416	10	2.2126	-2.2126	29.9238	-29.9238	64.9			1352.43			-2.07509	1.65276
20180220 hela spreading 20xPA FN RICM 1	4	8	2319.75	847.445	16	1.69301	-1.69301	39.2735	-39.2735	57.931			2319.75			-2.23388	6.82156
20180220 hela spreading 20xPA FN RICM 1	5	5	953.355	468.44	20	6.48214	-6.48214	61.7978	-61.7978	47.011			953.355			-1.53828	0.826354
20180220 hela spreading 20xPA FN RICM 1	5	9	2014.97	771.488	16	10.1453	-10.1453	204.425	-204.425	82.165			2014.97			-10.0624	0.567032
20180220 hela spreading 20xPA FN RICM 1	6	9	2999.21	1005.75	17	3.94126	-3.94126	118.207	-118.207	91.526			2999.21			-6.81767	1.1501
20180220 hela spreading 20xPA FN RICM 2	1	5	2068.95	785.206	11	5.98353	-5.98353	123.796	-123.796	66.876	30	-2.61184	2122.99	9.36894	203.54	-10.943	2.99019
20180220 hela spreading 20xPA FN RICM 2	2	1	2031.46	775.693							24	-4.89601	2130.92	10.2724	194.908	5.84641	9.58867
20180220 hela spreading 20xPA FN RICM 2	2	6	1630.6	669.961	10	4.05101	-4.05101	66.0558	-66.0558	58.66	26	1.60055	1604.5	7.98577	185.547	-4.5345	4.5691
20180220 hela spreading 20xPA FN RICM 2	2	8	2245.4	829.24	11	4.85804	-4.85804	109.082	-109.082	67.292	25	-3.02851	2313.4	9.14217	208.429	-9.70269	2.51446
20180220 hela spreading 20xPA FN RICM 2	3	1	3142.55	1037.54	21	14.6239	-14.6239	459.564	-459.564	796.48	5	4.14545	3012.28	18.2036	425.074	-33.0431	49.0941
20180220 hela spreading 20xPA FN RICM 2	3	2	1041.56	496.904	30	2.43014	-2.43014	25.3113	-25.3113	220.597	10	1.11907	1029.9	8.84332	141.657	-1.64828	11.5262
20180220 hela spreading 20xPA FN RICM 2	3	3	1646.51	674.312	60	17.048	-17.048	280.697	-280.697	253.567	38	15.3219	1394.24	-1.10509	180.243	-11.0554	3.64842
20180220 hela spreading 20xPA FN RICM 2	3	6	2994.01	1004.58	7	1.5867	-1.5867	47.5061	-47.5061	100.678	23	2.72188	2912.52	6.91785	272.496	1.48635	4.61579
20180220 hela spreading 20xPA FN RICM 2	3	7	1795.73	714.46	23	7.64849	-7.64849	137.346	-137.346	136.248	28	7.241	1665.7	2.52686	176.291	-10.4776	4.43271
20180220 hela spreading 20xPA FN RICM 2	3	8	2404.41	867.941	40	10.7557	-10.7557	258.612	-258.612	773.078	10	5.41297	2274.26	16.0706	343.429	-10.1766	29.6802
20180220 hela spreading 20xPA FN RICM 2	3	9	1478.22	627.544	20	40.9711	-40.9711	605.645	-605.645	240.462	10	35.1342	958.861	-6.68612	210.821	-53.9604	19.7996
20180220 hela spreading 20xPA FN RICM 2	3	12	1338.84	587.447	4	3.73296	-3.73296	49.9783	-49.9783	168.49	4	3.73296	1288.86	7.40453	168.49	-0.102687	18.7082
20180220 hela spreading 20xPA FN RICM 2	4	1	2631.78	921.829	43	11.6373	-11.6373	306.267	-306.267	661.48	7	4.74898	2506.8	5.95998	253.671	-10.8869	27.9309
20180220 hela spreading 20xPA FN RICM 2	4	2	1798.71	715.252	15	10.2115	-10.2115	183.675	-183.675	308.067	9	7.5505	1662.9	16.3868	254.503	-14.4684	30.9908
20180220 hela spreading 20xPA FN RICM 2	4	4	2397.04	866.165	8	11.8388	-11.8388	283.78	-283.78	119.295	14	10.6487	2141.78	0.893228	220.285	-18.8281	12.8879
20180220 hela spreading 20xPA FN RICM 2	4	10	1948.94	754.54	43	14.1447	-14.1447	275.672	-275.672	437.866	21	7.21809	1808.26	2.08504	180.659	-2.79047	23.713
20180220 hela spreading 20xPA FN RICM 2	4	11	1667.99	680.163	8	8.29051	-8.29051	138.285	-138.285	255.335	4	5.03387	1584.03	5.99704	189.187	-12.3784	23.1912
20180220 hela spreading 20xPA FN RICM 2	4	13	2330.03	849.947	10	6.78017	-6.78017	157.98	-157.98	290.489	7	5.88894	2192.82	5.94025	241.815	-16.6022	22.5152
20180220 hela spreading 20xPA FN RICM 2	5	2	2751.88	949.664							19	-0.267195	2759.23	16.6649	351.957	8.33175	12.0024
20180220 hela spreading 20xPA FN RICM 2	5	4	1806.3	717.26	45	8.3476	-8.3476	150.782	-150.782	468.132	10	2.35025	1763.84	17.3845	273.12	-2.47198	31.9115
20180220 hela spreading 20xPA FN RICM 2	5	8	1663.21	678.864	35	13.1477	-13.1477	218.674	-218.674	387.111	8	4.70376	1584.98	14.3773	254.607	-10.8102	27.7426
20180220 hela spreading 20xPA FN RICM 2	5	9	1482.48	628.748	16	14.5749	-14.5749	216.071	-216.071	406.872	7	12.1498	1302.36	12.8674	250.863	-23.7583	34.9813
20180220 hela spreading 20xPA FN RICM 2	5	11	1563.25	651.384	26	12.6607	-12.6607	197.919	-197.919	315.035	8	4.73129	1489.29	14.395	244.519	-7.06308	24.7307
20180220 hela spreading 20xPA FN RICM 2	6	2	3239.04	1058.67	57	17.24	-17.24	558.41	-558.41	1383.49	2	2.46718	3159.13	7.31353	290.905	-19.5172	58.0711
20180220 hela spreading 20xPA FN RICM 2	6	6	3576.08	1130.9	20	14.8429	-14.8429	530.796	-530.796	670.528	10	9.82883	3224.59	10.4596	411.345	-28.0687	35.2052
20180220 hela spreading 20xPA FN RICM 2	6	7	1649.8	675.21	11	2.14811	-2.14811	35.4396	-35.4396	98.078	18	1.12825	1631.19	22.1611	291.738	-1.31964	5.66057
20180220 hela spreading 20xPA FN RICM 2	6	9	2463.14	882.017	23	11.4707	-11.4707	282.54	-282.54	666.784	10	7.0712	2288.97	11.0696	312.331	-15.2235	28.6944
20180220 hela spreading 20xPA FN RICM 2	6	19	1493.38	631.827	19	24.6883	-24.6883	368.69	-368.69	328.764	9	19.1819	1206.92	1.39843	205.204	-28.9239	21.7379
20180220 hela spreading 20xPA FN RICM 2	6	21	1864.03	732.464	31	7.96397	-7.96397	148.451	-148.451	144.257	32	7.0365	1732.87	0.998284	160.274	-6.12026	7.86817
20180220 hela spreading 20xPA FN RICM 2	3	11	1315.4	580.571							32	-1.48396	1334.92	8.07016	144.673	6.9492	5.14272
20180220 hela spreading 20xPA FN RICM 2	5	5	1462.04	622.956							14	-2.86485	1503.93	22.5869	259.704	6.30648	5.46919
20180220 hela spreading 20xPA FN RICM 2	6	1	1617.16	666.274							13	-9.16736	1765.41	16.9336	209.053	17.2752	10.3947
20180220 hela spreading 20xPA FN RICM 2	6	13	1324.15	583.144							11	-4.25668	1380.52	13.334	176.915	5.74956	3.99193
20180220 hela spreading 20xPA FN RICM 2	6	17	2593.04	912.76							8	-5.91851	2746.51	11.6107	240.254	14.1385	22.7947
20180220 hela spreading 20xPA FN RICM 2	3	4	2575.96	908.747							19	-2.34978	2636.48	9.70342	242.647	14.4655	7.99635
20180220 hela spreading 20xPA FN RICM 2	3	10	1483.25	628.965							18	3.20355	1435.73	5.92597	164.018	4.00544	6.64437
20180220 hela spreading 20xPA FN RICM 2	4	5	2086.97	789.76	24	9.39807	-9.39807	196.135	-196.135	546.865	9	1.15973	2062.77	10.756	245.663	-3.65028	23.1713
20180220 hela spreading 20xPA FN RICM 2	4	8	2394.05	865.446							16	-1.30203	2425.22	15.2501	301.618	6.14141	5.36937
20180220 hela spreading 20xPA FN RICM 2	4	9	2342.79	853.046							30	1.31178	2312.05	7.8393	232.246	8.8205	9.6795
20180220 hela spreading 20xPA FN RICM 2	4	12	1841.08	726.439	42	8.69142	-8.69142	160.016	-160.016	272.08	26	5.17254	1745.85	4.74283	189.707	-0.816788	1.24293
20180220 hela spreading 20xPA FN RICM 2	5	1	1758.74	704.615	51	13.9966	-13.9966	246.163	-246.163	390.284	18	4.00381	1688.32	14.9326	265.528	-1.74133	5.20532
20180220 hela spreading 20xPA FN RICM 2	5	3	1327.46	584.115	21	3.36945	-3.36945	44.7281	-44.7281	326.111	10	1.10412	1312.8	12.7141	195.532	-0.690116	13.0281
20180220 hela spreading 20xPA FN RICM 2	5	10	1666.39	679.727	43	4.97122	-4.97122	82.8396	-82.8396	268.18	14	-1.31776	1688.34	8.62124	176.603	3.29248	6.11475
20180220 hela spreading 20xPA FN RICM 2	5	12	1358.15	593.083	43	5.32578	-5.32578	72.3321	-72.3321	359.134	10	-2.50051	1392.11	17.1626	215.085	3.98027	25.5542
20180220 hela spreading 20xPA FN RICM 2	5	13	2452.4	879.452	38	11.5196	-11.5196	282.506	-282.506	480.405	10	0.964027	2428.76	10.8678	273.536	-3.51262	27.774
20180220 hela spreading 20xPA FN RICM 2	6	5	1790.99	713.204	25	9.64072	-9.64072	172.665	-172.665	506.614	10	4.19429	1715.87	24.9325	332.612	-7.55368	30.461
20180220 hela spreading 20xPA FN RICM 2	6	4	1604.19	662.706	27	9.07396	-9.07396	145.563	-145.563	605.316	8	2.13893	1569.88	20.9121	281.857	-3.21714	36.3731
20180220 hela spreading 20xPA FN RICM 2	6	8	1683.16	684.281	16	9.15924	-9.15924	154.165	-154.165	434.226	8	0.607752	1672.93	14.1413	141.24	-4.23905	32.3767
20180220 hela spreading 20xPA FN RICM 2	6	10	1438.7	616.308	17	5.10793	-5.10793	73.4879	-73.4879	468.444	7	-1.57666	1461.39	20.6377	249.199	-3.06923	30.8944
20180220 hela spreading 20xPA FN RICM 2	6	11	2301.72	843.048	31	14.1507	-14.1507	325.708	-325.708	635.166	12	4.51776	2197.73	16.9871	337.188	-7.19297	15.8669
20180220 hela spreading 20xPA FN RICM 2	6	12	1991.15	765.398							9	-1.99174	2030.81	15.1623	262.512	-0.596706	24.8998
20180220 hela spreading 20xPA FN RICM 2	6	14	1728.38	696.482	34	11.4568	-11.4568	198.017	-198.017	419.665	12	2.31144	1688.43	12.5968	237.758	-0.845213	15.4487
20180220 hela spreading 20xPA FN RICM 2	6	16	1292.61	573.846	27	7.56178	-7.56178	97.7443	-97.7443	327.204	8	0.564967	1285.31	16.951	217.165	-3.58462	25.4534
20180220 hela spreading 20xPA FN RICM 2	6	18	2230.2	825.493	33	5.00372	-5.00372	111.593	-111.593	473.124	10	0.671513	2215.22	7.02895	209.469	-0.980872	11.8421
20180220 hela spreading 20xPA FN RICM 2	6	20	2019.41	772.621							12	-1.07518	2041.12	26.2242	354.349	3.43876	8.58966
20180220 hela spreading 20xPA FN RICM 2	6	22	1482.19	628.666							20	1.07071	1466.32	25.7334	291.322	5.99575	6.63269
20180220 hela spreading 20xPA FN RICM 2	1	6	2068.64	785.13	6	2.76684	-2.76684	57.236	-57.236	42.123			2068.64			0.117095	-1.54088
20180220 hela spreading 20xPA FN RICM 2	1	7	1854.16	729.875									1854.16			3.87451	3.74117
20180220 hela spreading 20xPA FN RICM 2	2	9	1919.84	747.011	11	19.0001	-19.0001	364.771	-364.771	34.634			1919.84			-28.4593	1.81532
20180220 hela spreading 20xPA FN RICM 2	3	3	1348.34	590.225							16	-5.93833	1428.41	16.5714	196.572	5.05586	2.13463
20180220 hela spreading 20xPA FN RICM 2	4	6	1932.13	750.197							47	-1.90711	1968.98	8.70346	191.58	4.83178	2.98516
20180220 hela spreading 20xPA FN RICM 2	4	7	2514.98	894.349							56	3.2353	2433.61	7.63224	255.647	0.969188	3.1048
20180220 hela spreading 20xPA FN RICM 2	5	7	1825.03	722.21	22	25.1029	-25.1029	458.135	-458.135	220.181	10	15.1633	1548.29	2.08467	221.013	-16.33	13.9822
20180308 HeLa RICM 20xPA cntrl30minincub	4	1	1946.43	753.893	41	8.24889	-8.24889	160.559	-160.559	450.295	29	6.13642	1826.99	14.9325	292.778	-1.06439	0.537366
20180308 HeLa RICM 20xPA cntrl30minincub	4	2	2165.8	809.525	41	13.882	-13.882	300.656	-300.656	353.881	25	11.1103	1925.18	6.47824	266.36	-14.281	14.6129
20180308 HeLa RICM 20xPA cntrl30minincub	4	3	2523.85	896.451	9	0.725917	-0.725917	18.3211	-18.3211	235.158	9	0.725917	2505.53	7.53861	235.158	-2.35541	22.4966
20180308 HeLa RICM 20xPA cntrl30minincub	4	4	1671.55	681.129	15	0.925401	-0.925401	15.4685	-15.4685	281.857	15	0.925401	1656.08	20.3078	281.857	-0.297695	13.3492
20180308 HeLa RICM 20xPA cntrl30minincub	4	5	2008.32	769.79	38	10.002	-10.002	200.871	-200.871	454.299	15	4.99553	1907.99	11.5164	266.568	-5.29015	11.5228
20180308 HeLa RICM 20xPA cntrl30minincub	4	6	3521.94	1119.45	10	6.86126	-6.86126	241.65	-241.65	638.494	3	2.89091	3420.13	7.2732	311.083	-22.444	48.8328
20180308 HeLa RICM 20xPA cntrl30minincub	4	7	2242.96	828.637							7	-0.623828	2256.95	8.09687	213.941	5.89418	16.173
20180308 HeLa RICM 20xPA cntrl30minincub	4	8	1465.72	624.001	10	3.67325	-3.67325	53.8396	-53.8396	67.6041	24	3.44123	1415.28	6.10492	165.786	-2.95509	5.40092
20180308 HeLa RICM 20xPA cntrl30minincub	4	9	1489.46	630.72	16	11.5475	-11.5475	171.996	-171.996	275.617	7	7.16551	1382.73	5.33842	180.867	-16.6109	23.8114
20180308 HeLa RICM 20xPA cntrl30minincub	4	12	2153.14	806.366	29	14.9268	-14.9268	321.395	-321.395	562.57	8	7.91304	1982.76	2.75369	206.972	-18.2536	12.1063
20180308 HeLa RICM 20xPA cntrl30minincub	5	1	1527.44	641.397	45	15.2438	-15.2438	232.841	-232.841	308.223	19	7.63028	1410.89	7.37904	202.708	-6.468	2.21013
20180308 HeLa RICM 20xPA cntrl30minincub	5	2	1390.41	602.439	25	5.4149	-5.4149	75.2895	-75.2895	430.066	11	2.12103	1360.92	7.68178	166.93	-1.32989	11.9607
20180308 HeLa RICM 20xPA cntrl30minincub	5	4	2287.87	839.664	20	8.13893	-8.13893	186.209	-186.209	394.132	14	6.30388	2143.65	9.18261	275.617	-9.38784	20.4346
20180308 HeLa RICM 20xPA cntrl30minincub	5	5	2034.93	776.575	25	13.0422	-13.0422	265.4	-265.4	431.522	7	5.85936	1915.69	6.4631	226.214	-14.8873	24.7163
20180308 HeLa RICM 20xPA cntrl30minincub	5	7	2626.51	920.599	36	7.29755	-7.29755	191.671	-191.671	412.229	19	3.17425	2543.14	10.1297	292.674	-6.97773	10.3232
20180308 HeLa RICM 20xPA cntrl30minincub	5	6	1867.27	733.311	2	0.86992	-0.86992	16.2437	-16.2437	88.925	21	-1.44594	1894.27	10.1662	206.868	1.52208	2.67663
20180308 HeLa RICM 20xPA cntrl30minincub	5	8	1218.55	551.714							27	-2.11462	1244.32	9.69096	148.417	-0.845233	6.31838
20180308 HeLa RICM 20xPA cntrl30minincub	5	9	1594.03	659.905	24	18.0529	-18.0529	287.768	-287.768	377.231	10	11.2355	1414.93	3.54144	194.804	-15.4962	11.5932
20180308 HeLa RICM 20xPA cntrl30minincub	5	10	2323.11	848.263	3	0.964368	-0.964368	22.4033	-22.4033	96.8298	18	0.048074	2321.99	7.93144	222.261	1.53843	8.02582
20180308 HeLa RICM 20xPA cntrl30minincub	5	11	1525.04	640.726	14	6.73002	-6.73002	102.636	-102.636	327.516	3	3.24841	1475.5	6.33418	171.298	-9.42108	27.3814
20180308 HeLa RICM 20xPA cntrl30minincub	5	12	1602.04	662.113	15	2.77213	-2.77213	44.4105	-44.4105	141.24	25	0.390424	1595.78	6.88897	164.642	-2.41222	7.16185
20180308 HeLa RICM 20xPA cntrl30minincub	5	13	2074.81	786.689	20	10.6406	-10.6406	220.772	-220.772	501.154	4	2.83923	2015.9	7.51906	221.013	-11.5565	28.8201
20180308 HeLa RICM 20xPA cntrl30minincub	6	1	1647.86	674.679	13	3.4037	-3.4037	56.088	-56.088	356.949	4	0.970096	1631.87	8.07594	183.987	-3.87735	16.6089
20180308 HeLa RICM 20xPA cntrl30minincub	6	2	2518.59	895.205	19	4.98969	-4.98969	125.67	-125.67	485.917	10	2.24985	2461.92	8.01194	253.255	-7.13101	19.8034
20180308 HeLa RICM 20xPA cntrl30minincub	6	3	1982.7	763.231	50	13.2874	-13.2874	263.45	-263.45	336.356	17	7.30945	1837.78	2.67807	190.643	-11.1167	3.25143
20180308 HeLa RICM 20xPA cntrl30minincub	6	4	1516.06	638.207	25	3.8061	-3.8061	57.7027	-57.7027	699.055	26	3.12547	1468.67	9.53421	197.924	-1.91764	3.98895
20180308 HeLa RICM 20xPA cntrl30minincub	6	5	1147.19	529.958	31	7.57461	-7.57461	86.8953	-86.8953	289.241	7	0.835707	1137.6	8.45688	146.857	-5.45645	21.694
20180308 HeLa RICM 20xPA cntrl30minincub	6	6	2071.09	785.749	20	12.0528	-12.0528	249.626	-249.626	350.813	11	9.75217	1869.12	5.15082	239.006	-17.2114	12.2571
20180308 HeLa RICM 20xPA cntrl30minincub	6	7	1159.62	533.78	46	5.93964	-5.93964	68.8774	-68.8774	110.247	37	4.46833	1107.81	3.14936	121.791	-0.485717	5.44795
20180308 HeLa RICM 20xPA cntrl30minincub	6	8	1490.27	630.949	11	1.56081	-1.56081	23.2602	-23.2602	157.257	6	0.723928	1479.48	7.56795	165.786	-1.00609	26.9039
20180308 HeLa RICM 20xPA cntrl30minincub	6	9	3195.67	1049.2	50	12.828	-12.828	409.94	-409.94	312.747	36	10.9688	2845.14	0.635832	265.944	-20.804	5.81915
20180308 HeLa RICM 20xPA cntrl30minincub	6	10	2197.61	817.432	18	10.1656	-10.1656	223.401	-223.401	328.66	6	5.49897	2076.77	4.95882	218.517	-16.171	25.9138
20180308 HeLa RICM 20xPA cntrl30minincub	6	11	1664.82	679.301	28	5.56921	-5.56921	92.7174	-92.7174	424.137	9	0.281757	1660.13	13.9733	233.702	-0.673778	18.0199
20180308 HeLa RICM 20xPA cntrl30minincub	6	12	1481.93	628.593	46	11.2352	-11.2352	166.499	-166.499	345.613	14	2.56811	1443.88	7.71768	176.915	-4.20079	12.7549
20180308 HeLa RICM 20xPA cntrl30minincub	7	1	2172.12	811.097	13	12.1975	-12.1975	264.945	-264.945	487.633	5	6.72583	2026.02	13.932	309.523	-23.426	43.3785
20180308 HeLa RICM 20xPA cntrl30minincub	7	2	1050.86	499.858							29	-3.03488	1082.75	11.0448	140.512
20180308 HeLa RICM 20xPA cntrl30minincub	7	5	2455.18	880.116	40	9.14355	-9.14355	224.491	-224.491	506.302	18	3.43133	2370.94	7.27766	248.679	-2.62484	7.8022
20180308 HeLa RICM 20xPA cntrl30minincub	7	6	1866.26	733.049							14	-7.33411	2003.14	11.822	185.131	11.1423	8.19022
20180308 HeLa RICM 20xPA cntrl30minincub	7	7	2231.74	825.873	37	3.50163	-3.50163	78.1472	-78.1472	575.363	16	0.456633	2221.55	11.0098	255.231	5.92505	7.99108
20180308 HeLa RICM 20xPA cntrl30minincub	7	11	2143.7	804.007							39	-7.01389	2294.06	12.0882	209.261	7.39722	8.17489
20180308 HeLa RICM 20xPA cntrl30minincub	7	12	1224.12	553.394	23	6.33112	-6.33112	77.5007	-77.5007	325.228	11	0.512569	1217.85	9.03573	156.425	-0.144676	13.2551
20180308 HeLa RICM 20xPA cntrl30minincub	7	13	1204.48	547.458	28	9.57099	-9.57099	115.281	-115.281	320.859	15	4.48492	1150.46	6.77748	155.697	-3.22746	9.94891
20180308 HeLa RICM 20xPA cntrl30minincub	7	14	1936.07	751.216	17	6.80739	-6.80739	131.796	-131.796	266.672	10	4.95197	1840.2	6.77951	216.541	-8.60965	17.4494
20180308 HeLa RICM 20xPA cntrl30minincub	7	15	2541.8	900.696	23	8.04713	-8.04713	204.542	-204.542	548.997	8	1.82899	2495.31	7.14942	240.15	-7.11891	27.5669
20180308 HeLa RICM 20xPA cntrl30minincub	8	1	2429.17	873.889	12	8.59992	-8.59992	208.907	-208.907	469.9	4	2.05984	2379.13	6.54009	226.734	-20.9697	37.1914
20180308 HeLa RICM 20xPA cntrl30minincub	8	2	1555.87	649.331	36	11.2417	-11.2417	174.906	-174.906	269.376	15	6.42439	1455.91	4.04394	170.258	-8.98603	7.36884
20180308 HeLa RICM 20xPA cntrl30minincub	8	3	1903.85	742.857	48	7.64837	-7.64837	145.613	-145.613	368.078	24	2.59687	1854.41	7.35505	205.412	-3.01696	5.46223
20180308 HeLa RICM 20xPA cntrl30minincub	8	4	1319.18	581.684	23	8.00079	-8.00079	105.545	-105.545	281.961	8	1.4411	1300.17	6.10448	143.321	-3.63498	15.1854
20180308 HeLa RICM 20xPA cntrl30minincub	8	5	2211.88	820.966	19	3.05998	-3.05998	67.6831	-67.6831	416.129	15	1.97247	2168.25	10.7918	260.64	-1.70866	11.2587
20180308 HeLa RICM 20xPA cntrl30minincub	8	6	1918.11	746.564	24	8.47041	-8.47041	162.472	-162.472	474.685	9	3.49526	1851.07	5.54927	192.412	-6.92118	15.0965
20180308 HeLa RICM 20xPA cntrl30minincub	8	7	1898.41	741.444	42	7.18004	-7.18004	136.307	-136.307	280.245	24	4.26714	1817.41	6.05971	201.98	-5.61519	2.86017
20180308 HeLa RICM 20xPA cntrl30minincub	8	8	1398.77	604.851	19	6.48789	-6.48789	90.7507	-90.7507	373.07	8	2.87963	1358.49	14.8582	223.613	-5.96082	23.8296
20180308 HeLa RICM 20xPA cntrl30minincub	8	9	4418.32	1302.13	37	11.2825	-11.2825	498.497	-498.497	848.171	20	6.47779	4132.11	3.4622	330.636	-14.1375	10.6762
20180308 HeLa RICM 20xPA cntrl30minincub	9	1	1864.27	732.525							21	6.68401e-06	1864.27	13.6454	247.847	3.66811	7.69126
20180308 HeLa RICM 20xPA cntrl30minincub	9	2	1991.9	765.59	32	4.25199	-4.25199	84.6957	-84.6957	312.435	21	1.5372	1961.29	8.49244	217.165	-0.0887645	8.11249
20180308 HeLa RICM 20xPA cntrl30minincub	9	3	1704.29	689.997	39	9.84291	-9.84291	167.752	-167.752	285.965	19	4.95394	1619.86	5.56647	187.211	-4.11174	9.9222
20180308 HeLa RICM 20xPA cntrl30minincub	9	7	1419.82	610.903	8	6.62482	-6.62482	94.0603	-94.0603	298.914	6	4.3719	1357.74	17.6284	247.639	-11.9551	35.2421
20180308 HeLa RICM 20xPA cntrl30minincub	9	9	4823.78	1380.62	42	7.95893	-7.95893	383.921	-383.921	1836.65	5	-2.58844	4948.64	9.14114	353.101	6.68182	47.3852
20180308 HeLa RICM 20xPA cntrl30minincub	9	11	1208.27	548.604	6	5.20075	-5.20075	62.839	-62.839	180.659	4	3.97154	1160.28	6.00663	147.585	-4.65523	11.2275
20180308 HeLa RICM 20xPA cntrl30minincub	9	13	1746.87	701.442							10	-2.14732	1784.39	9.32751	184.507	4.8401	16.0908
20180308 HeLa RICM 20xPA cntrl30minincub	9	14	1505.82	635.33							24	-2.0491	1536.67	8.67022	161.002	1.436	4.5188
20180308 HeLa RICM 20xPA cntrl30minincub	10	1	2400.04	866.888	28	11.7786	-11.7786	282.69	-282.69	543.069	11	6.1887	2251.51	7.21192	263.136	-15.1012	16.0274
20180308 HeLa RICM 20xPA cntrl30minincub	10	2	1287.87	572.442	31	8.97322	-8.97322	115.563	-115.563	196.468	12	4.97896	1223.74	3.72186	139.264	-6.78314	9.27764
20180308 HeLa RICM 20xPA cntrl30minincub	10	4	1481.17	628.377	23	13.1562	-13.1562	194.865	-194.865	327.308	9	4.71366	1411.35	5.95153	172.65	-9.44295	16.7406
20180308 HeLa RICM 20xPA cntrl30minincub	10	6	2277.84	837.208	28	13.367	-13.367	304.479	-304.479	498.398	10	5.78622	2146.04	9.88544	278.737	-13.9187	22.6006
20180308 HeLa RICM 20xPA cntrl30minincub	10	7	1072.46	506.687	10	8.82414	-8.82414	94.6357	-94.6357	267.4	4	3.164	1038.53	5.48287	128.448	-10.6652	24.0341
20180308 HeLa RICM 20xPA cntrl30minincub	10	9	2468.59	883.316	50	3.40408	-3.40408	84.0327	-84.0327	395.328	21	1.89521	2421.8	6.58394	228.398	-0.378524	7.01907
20180308 HeLa RICM 20xPA cntrl30minincub	10	10	1433.7	614.88	27	12.9005	-12.9005	184.955	-184.955	279.673	8	5.06815	1361.04	4.36559	156.425	-8.17117	13.132
20180308 HeLa RICM 20xPA cntrl30minincub	10	11	3034.32	1013.58	20	10.637	-10.637	322.762	-322.762	627.366	7	4.88037	2886.24	8.70993	316.907	-24.9213	26.3136
20180308 HeLa RICM 20xPA cntrl30minincub	10	12	1466.31	624.168	10	8.09103	-8.09103	118.64	-118.64	398.864	4	4.21944	1404.44	9.48305	198.132	-12.2912	31.6629
20180308 HeLa RICM 20xPA cntrl30minincub	10	13	1577.77	655.41	14	5.9683	-5.9683	94.166	-94.166	117.631	16	5.19846	1495.75	4.01986	164.018	-5.87783	10.6152
20180308 HeLa RICM 20xPA cntrl30minincub	10	14	1688.61	685.757	42	12.2497	-12.2497	206.85	-206.85	307.078	25	8.88017	1538.66	5.55143	207.596	-7.59557	4.66988
20180308 HeLa RICM 20xPA cntrl30minincub	10	15	1923.32	747.915	12	7.34288	-7.34288	141.227	-141.227	324.5	8	4.90182	1829.05	5.84919	205.62	-11.5193	19.5193
20180308 HeLa RICM 20xPA cntrl30minincub	11	1	1635.39	671.273	30	6.27195	-6.27195	102.571	-102.571	272.392	11	2.34045	1597.12	9.57637	204.58	-2.91061	9.68298
20180308 HeLa RICM 20xPA cntrl30minincub	11	2	1898.06	741.35	15	9.62942	-9.62942	182.772	-182.772	357.365	5	4.71395	1808.58	3.88614	180.347	-16.0851	28.1753
20180308 HeLa RICM 20xPA cntrl30minincub	11	3	1458.75	622.02	16	2.66524	-2.66524	38.8792	-38.8792	301.826	7	-0.672474	1468.56	8.15699	160.898	0.226163	18.9102
20180308 HeLa RICM 20xPA cntrl30minincub	11	4	2241.55	828.292	39	10.0411	-10.0411	225.076	-225.076	454.403	17	5.00132	2129.45	6.08704	231.206	-6.752	9.53217
20180308 HeLa RICM 20xPA cntrl30minincub	11	5	2588.39	911.67	22	2.3656	-2.3656	61.2311	-61.2311	403.96	9	-0.0625994	2590.01	8.26607	242.647	-1.82028	21.2808
20180308 HeLa RICM 20xPA cntrl30minincub	11	6	2461.14	881.54	39	5.92655	-5.92655	145.861	-145.861	231.934	34	5.07099	2336.34	6.8467	255.751	-2.19475	7.04626
20180308 HeLa RICM 20xPA cntrl30minincub	11	7	1504.49	634.956	22	10.1545	-10.1545	152.774	-152.774	189.811	9	8.32599	1379.23	2.6406	164.33	-12.7876	14.4863
20180308 HeLa RICM 20xPA cntrl30minincub	11	8	1557.67	649.833	11	9.86672	-9.86672	153.691	-153.691	279.777	5	4.85708	1482.02	9.7866	211.549	-15.4584	23.9526
20180308 HeLa RICM 20xPA cntrl30minincub	11	9	1305.99	577.799	22	11.6294	-11.6294	151.879	-151.879	350.397	5	2.21171	1277.1	5.9973	145.817	-8.04002	15.5069
20180308 HeLa RICM 20xPA cntrl30minincub	11	11	1165.26	535.508	8	5.01903	-5.01903	58.4848	-58.4848	125.328	14	2.97928	1130.54	5.38647	133.96	-5.47251	9.68312
20180308 HeLa RICM 20xPA cntrl30minincub	11	12	2421.8	872.119	47	7.16181	-7.16181	173.445	-173.445	726.068	5	1.45734	2386.5	6.89618	226.11	-4.41184	38.7458
20180308 HeLa RICM 20xPA cntrl30minincub	11	13	1538.13	644.387	16	8.51298	-8.51298	130.941	-130.941	475.205	3	-0.683457	1548.65	8.24886	167.554	-11.3228	30.1375
