# Supplementary material for: A mechano-osmotic feedback couples cell volume to the rate of cell deformation
Source: eLife journal article supplement (doi:10.7554/elife.72381), 2022-04-13
Supplement: supp [file control_dvdt_dadt_different_intervals.xlsx]

## Sheet: 20180220 30 norm
exp	pos	cell	10min slope absolute	dV/dt	dA/dt	area
20180220 30	3	1	10	-9.55262	8.30579
20180220 30	3	1	20	-0.934626	7.64357	209.053
20180220 30	3	1	30	-1.82322	8.24397	296.938
20180220 30	3	1	40	0.0991032	1.71033
20180220 30	3	1	50	0.213774	16.1804
20180220 30	3	1	60	1.1995	1.3936
20180220 30	3	3	10	-10.9359	#DIV/0!
20180220 30	3	3	20	-7.46352	12.5067
20180220 30	3	3	30	-3.51233	#DIV/0!
20180220 30	3	3	40	-1.38528	1.47622
20180220 30	3	3	50	1.99863	5.49383
20180220 30	3	3	60	3.96139	#DIV/0!
20180220 30	3	6	10	-7.84836	6.1033
20180220 30	3	6	20	-3.0046	14.2901
20180220 30	3	6	30	1.28962	14.2814
20180220 30	3	6	40	7.61469	8.40929
20180220 30	3	6	50	5.14198	2.21342
20180220 30	3	6	60	2.10553	-13.6874
20180220 30	3	8	10	-2.24131	2.51263
20180220 30	3	8	20	1.12343	0.658667
20180220 30	3	8	30	4.74128	#DIV/0!
20180220 30	3	8	40	2.65921	#DIV/0!
20180220 30	3	8	50	3.6037	#DIV/0!
20180220 30	3	8	60	-2.31495	#DIV/0!
20180220 30	4	1	10	-10.2026	12.2547
20180220 30	4	1	20	-6.53997	6.86439
20180220 30	4	1	30	-3.79484	6.11598
20180220 30	4	1	40	-2.79031	6.22674
20180220 30	4	1	50	-1.63563	11.8371
20180220 30	4	1	60	1.35223	5.94838
20180220 30	4	3	10	-6.38204	2.37918
20180220 30	4	3	20	8.57173	2.43009
20180220 30	4	3	30	-0.443206	3.47711
20180220 30	4	3	40	1.45721	4.39013
20180220 30	4	3	50	0.634429	2.06443
20180220 30	4	3	60	2.73382	1.32608
20180220 30	4	4	10	-4.22402	8.33999
20180220 30	4	4	20	-5.73333	21.8408
20180220 30	4	4	30	-2.72637	14.0998
20180220 30	4	4	40	-0.112314	7.38435
20180220 30	4	4	50	0.522397	4.12063
20180220 30	4	4	60	-0.924334	3.03353
20180220 30	4	6	10	-7.34656	5.79075
20180220 30	4	6	20	-4.72337	9.38646
20180220 30	4	6	30	6.53323	-0.6448
20180220 30	4	6	40	-0.59634	#DIV/0!
20180220 30	4	6	50	-2.22367	8.09014
20180220 30	4	6	60	3.80205	#DIV/0!
20180220 30	4	7	10	-6.69694	5.60124
20180220 30	4	7	20	-5.42702	14.4758
20180220 30	4	7	30	-2.38461	6.59242
20180220 30	4	7	40	0.937485	1.64207
20180220 30	4	7	50	1.24943	-1.74558
20180220 30	4	7	60	0.940523	5.68105
20180220 30	5	1	10	-2.72167	2.13938
20180220 30	5	1	20	2.21813	0.0172845
20180220 30	5	1	30	2.86575	0.0240747
20180220 30	5	1	40	-0.210737	-0.199022
20180220 30	5	1	50	-4.58261	2.7142
20180220 30	5	1	60	-2.7154	15.2633
20180220 30	5	2	10	-9.73111	7.51693
20180220 30	5	2	20	-6.75883	34.0059
20180220 30	5	2	30	-1.06785	10.7963
20180220 30	5	2	40	1.63011	3.10023
20180220 30	5	2	50	1.72257	3.27053
20180220 30	5	2	60	-0.242452	-0.921342
20180220 30	5	4	10	-9.22462	5.98287
20180220 30	5	4	20	-4.74241	#DIV/0!
20180220 30	5	4	30	-0.333251	-0.282157
20180220 30	5	4	40	3.36982	-1.59237
20180220 30	5	4	50	11.933	1.89985
20180220 30	5	4	60	2.91856	-1.80612
20180220 30	5	6	10	-11.7473	5.53347
20180220 30	5	6	20	4.80366	3.63654
20180220 30	5	6	30	4.65883	44.688
20180220 30	5	6	40	12.2511	5.98035
20180220 30	5	6	50	12.5066	-2.5388
20180220 30	5	6	60	-2.44239	2.45905
20180220 30	5	7	10	-1.06223	3.27613
20180220 30	5	7	20	5.02103	1.29195
20180220 30	5	7	30	3.60165	0.166354
20180220 30	5	7	40	0.662306	19.6364
20180220 30	5	7	50	5.72474	-1.23076
20180220 30	5	7	60	0.574635	-1.02519
20180220 30	5	10	10	-15.0018	27.1352
20180220 30	5	10	20	-1.76929	4.14823
20180220 30	5	10	30	-3.7574	3.56368
20180220 30	5	10	40	0.632806	8.38815
20180220 30	5	10	50	1.99732	-2.86371
20180220 30	5	10	60	3.45881	-3.09512
20180220 30	6	4	10	-4.40837	34.5948
20180220 30	6	4	20	-7.85922	34.7709
20180220 30	6	4	30	-26.0989	1.24969
20180220 30	6	4	40	16.0196	-1.03505
20180220 30	6	4	50	9.97052	-0.860404
20180220 30	6	4	60	-2.19206	-0.888574
20180220 30	6	5	10	-11.7287	13.3683
20180220 30	6	5	20	-8.71831	5.40753
20180220 30	6	5	30	-3.05444	4.52922
20180220 30	6	5	40	0.520054	6.14633
20180220 30	6	5	50	4.45889	4.43983
20180220 30	6	5	60	5.17268	11.5469
20180220 30	6	6	10	1.95285	#DIV/0!
20180220 30	6	6	20	3.75956	2.0383
20180220 30	6	6	30	-5.59596	22.8484
20180220 30	6	6	40	-2.7678	8.00566
20180220 30	6	6	50	1.00238	-0.565624
20180220 30	6	6	60	0.373	4.82075
20180220 30	6	8	10	3.64853	8.24252
20180220 30	6	8	20	5.57817	2.15473
20180220 30	6	8	30	3.22426	-1.18678
20180220 30	6	8	40	-1.38348	6.84007
20180220 30	6	8	50	-1.93559	3.16637
20180220 30	6	8	60	-2.21042	1.74008
20180220 30	6	10	10	-11.2192	20.229
20180220 30	6	10	20	-8.29416	6.55611
20180220 30	6	10	30	-6.30086	6.6563
20180220 30	6	10	40	14.7548	3.27925
20180220 30	6	10	50	-24.2029	8.33085
20180220 30	6	10	60	13.9982	-2.05935
20180220 30	6	12	10	-7.24667	30.0754
20180220 30	6	12	20	-9.37799	10.5567
20180220 30	6	12	30	12.3506	18.3589
20180220 30	6	12	40	-6.82658	15.1064
20180220 30	6	12	50	-4.09637	4.22577
20180220 30	6	12	60	5.39506	13.9094
20180220 30	6	13	10	-16.1283	11.822
20180220 30	6	13	20	-1.91706	9.13087
20180220 30	6	13	30	-0.096355	2.67383
20180220 30	6	13	40	1.47838	3.16059
20180220 30	6	13	50	4.88514	6.47591
20180220 30	6	13	60	4.53576	10.5184
20180220 30	6	14	10	-11.8186	34.6097
20180220 30	6	14	20	-10.3731	6.54673
20180220 30	6	14	30	-3.41877	8.27684
20180220 30	6	14	40	8.53909	9.74677
20180220 30	6	14	50	6.99035	5.72035
20180220 30	6	14	60	4.18631	11.817
20180220 30	6	15	10	-12.8635	29.7235
20180220 30	6	15	20	-2.08396	-0.474318
20180220 30	6	15	30	0.834143	6.52441
20180220 30	6	15	40	4.32364	-0.504409
20180220 30	6	15	50	3.13254	1.15944
20180220 30	6	15	60	1.13738	-1.25639
20180220 30	7	1	10	-15.5541	33.5763
20180220 30	7	1	20	-6.50745	24.1517
20180220 30	7	1	30	2.70717	18.5201
20180220 30	7	1	40	5.35111	8.57515
20180220 30	7	1	50	3.94857	14.4846
20180220 30	7	1	60	2.7717	2.2167
20180220 30	7	2	10	-6.6191	7.79674
20180220 30	7	2	20	-3.07801	5.53374
20180220 30	7	2	30	-1.74286	7.04643
20180220 30	7	2	40	-2.27675	4.70105
20180220 30	7	2	50	0.426921	2.24371
20180220 30	7	2	60	1.0552	2.65544
20180220 30	7	3	10	-6.82667	8.39807
20180220 30	7	3	20	-7.75386	10.9078
20180220 30	7	3	30	-4.24374	8.24172
20180220 30	7	3	40	-0.552653	0.74951
20180220 30	7	3	50	1.94196	4.13425
20180220 30	7	3	60	4.13933	2.7145
20180220 30	7	4	10	-14.3195	40.9809
20180220 30	7	4	20	3.57676	36.6214
20180220 30	7	4	30	0.628055	8.6585
20180220 30	7	4	40	1.57702	1.59704
20180220 30	7	4	50	2.49626	-3.5196
20180220 30	7	4	60	1.12173	0.22802
20180220 30	7	5	10	-8.77177	29.9587
20180220 30	7	5	20	-3.93922	16.828
20180220 30	7	5	30	2.97407	15.0872
20180220 30	7	5	40	4.20793	12.096
20180220 30	7	5	50	4.76608	5.4187
20180220 30	7	5	60	6.16586	9.43335
20180220 30	7	6	10	9.09274	4.69254
20180220 30	7	6	20	5.07445	1.86252
20180220 30	7	6	30	-0.499616	13.7227
20180220 30	7	6	40	-0.306766	4.71415
20180220 30	7	6	50	-1.15476	4.1134
20180220 30	7	6	60	2.48899	1.02269
20180220 30	9	1	10	-9.58537	20.0634
20180220 30	9	1	20	-5.26974	4.13396
20180220 30	9	1	30	0.933401	8.76902
20180220 30	9	1	40	4.33385	-2.45197
20180220 30	9	1	50	1.4319	-3.57774
20180220 30	9	1	60	-0.344171	-2.06975
20180220 30	9	2	10	-12.1662	5.37361
20180220 30	9	2	20	-2.09849	18.9396
20180220 30	9	2	30	-4.7191	7.96953
20180220 30	9	2	40	0.309305	1.13365
20180220 30	9	2	50	2.56051	5.07555
20180220 30	9	2	60	2.43146	9.2774
20180220 30	9	3	10	-3.50544	7.17832
20180220 30	9	3	20	-4.241	3.93523
20180220 30	9	3	30	-1.67201	2.19455
20180220 30	9	3	40	-1.38877	1.92405
20180220 30	9	3	50	-0.392936	3.35988
20180220 30	9	3	60	-2.25491	2.81432
20180220 30	9	4	10	-1.94343	8.93453
20180220 30	9	4	20	-1.20791	2.62617
20180220 30	9	4	30	-1.57019	2.68
20180220 30	9	4	40	-0.328583	8.9393
20180220 30	9	4	50	-1.28774	8.18005
20180220 30	9	4	60	-0.540456	1.23006
20180220 30	3	4	10	0.0307241	16.8625
20180220 30	3	4	20	-3.87461	11.1002
20180220 30	3	4	30	2.59746	-4.08027
20180220 30	3	4	40	3.04948	-1.7888
20180220 30	3	4	50	0.478164	2.413
20180220 30	3	4	60	-2.21396	5.8452
20180220 30	3	5	10	1.13338	21.4254
20180220 30	3	5	20	-6.07054	14.2673
20180220 30	3	5	30	-10.8549	7.48064
20180220 30	3	5	40	3.3955	0.924306
20180220 30	3	5	50	1.16452	9.10061
20180220 30	3	5	60	-0.13093	7.5718
20180220 30	3	7	10	-4.30491	13.2407
20180220 30	3	7	20	-1.4895	15.4499
20180220 30	3	7	30	9.61777	13.6248
20180220 30	3	7	40	-6.69977	7.6445
20180220 30	3	7	50	0.0396997	#DIV/0!
20180220 30	3	7	60	0.644616	#DIV/0!
20180220 30	3	9	10	-4.31304	25.382
20180220 30	3	9	20	-3.82169	4.5556
20180220 30	3	9	30	2.77989	9.25694
20180220 30	3	9	40	0.507217	4.909
20180220 30	3	9	50	0.860113	3.2658
20180220 30	3	9	60	1.46194	-3.037
20180220 30	4	9	10	-7.33127	13.4614
20180220 30	4	9	20	-4.66865	7.05009
20180220 30	4	9	30	4.95606	0.516667
20180220 30	4	9	40	0.649894	2.06987
20180220 30	4	9	50	0.509852	-2.77926
20180220 30	4	9	60	-0.0216835	2.11376
20180220 30	5	3	10	-1.30524	4.16024
20180220 30	5	3	20	-2.52019	2.03543
20180220 30	5	3	30	-6.33646	7.73492
20180220 30	5	3	40	-1.75832	#DIV/0!
20180220 30	5	3	50	-1.59222	#DIV/0!
20180220 30	5	3	60	0.847626	1.42363
20180220 30	6	1	10	-1.5513	11.2523
20180220 30	6	1	20	2.68222	2.71276
20180220 30	6	1	30	0.869239	1.54724
20180220 30	6	1	40	0.103297	1.73212
20180220 30	6	1	50	-2.23249	0.0398052
20180220 30	6	1	60	-3.62123	12.9824
20180220 30	6	2	10	0.332133	6.8193
20180220 30	6	2	20	-4.1518	6.80979
20180220 30	6	2	30	-5.08813	5.76986
20180220 30	6	2	40	-0.49408	-2.85108
20180220 30	6	2	50	3.36971	-0.559643
20180220 30	6	2	60	5.54766	-0.771737
20180220 30	6	3	10	-1.35921	11.8286
20180220 30	6	3	20	-2.97735	21.9444
20180220 30	6	3	30	-0.177955	0.143226
20180220 30	6	3	40	-0.388463	2.98645
20180220 30	6	3	50	-3.30184	1.20102
20180220 30	6	3	60	-1.59499	2.1322
20180220 30	6	11	10	7.20844	16.3602
20180220 30	6	11	20	9.09165	27.468
20180220 30	6	11	30	8.40824	8.88585
20180220 30	6	11	40	7.14632	14.7108
20180220 30	6	11	50	2.58301	7.32253
20180220 30	6	11	60	1.53406	-0.683815
20180220 30	6	16	10	12.1897	7.374
20180220 30	6	16	20	-0.247588	4.43567
20180220 30	6	16	30	1.72117	11.1626
20180220 30	6	16	40	1.34172	6.81744
20180220 30	6	16	50	2.50978	2.25345
20180220 30	6	16	60	1.83337	1.03097
20180220 30	4	5	10	-2.07509	1.65276
20180220 30	4	5	20	0.385717	-0.0957212
20180220 30	4	5	30	0.656328	-2.13185
20180220 30	4	5	40	1.84155	0.632244
20180220 30	4	5	50	2.10126	1.73095
20180220 30	4	5	60	4.03871	-1.47592
20180220 30	4	8	10	-2.23388	6.82156
20180220 30	4	8	20	-0.0623043	-0.653857
20180220 30	4	8	30	2.67735	2.93056
20180220 30	4	8	40	3.91975	#DIV/0!
20180220 30	4	8	50	7.43099	#DIV/0!
20180220 30	4	8	60	2.10515	#DIV/0!
20180220 30	5	5	10	-1.53828	0.826354
20180220 30	5	5	20	-4.59365	0.0729825
20180220 30	5	5	30	0.287716	-0.350368
20180220 30	5	5	40	-0.804083	-0.34538
20180220 30	5	5	50	2.00988	0.508258
20180220 30	5	5	60	1.33145	3.328
20180220 30	5	9	10	-10.0624	0.567032
20180220 30	5	9	20	-6.77358	-0.314988
20180220 30	5	9	30	3.3682	-0.407091
20180220 30	5	9	40	3.10448	0.746718
20180220 30	5	9	50	-1.05086	-1.80436
20180220 30	5	9	60	-3.62149	2.11229
20180220 30	6	9	10	-6.81767	1.1501
20180220 30	6	9	20	-1.48471	0.409882
20180220 30	6	9	30	5.585	-1.99848
20180220 30	6	9	40	16.1907	0.6485
20180220 30	6	9	50	13.7669	0.172849
20180220 30	6	9	60	6.35577	-1.19923

## Sheet: 20180220 60 n
	pos	cell	10min slope absolute	dV/dt	dA/dt
20180220 60	1	5	10	-10.943	2.99019
20180220 60	1	5	20	18.0785	6.07999
20180220 60	1	5	30	2.53325	5.0956
20180220 60	1	5	40	-5.40793	-3.12535
20180220 60	1	5	50	-0.941649	0.680346
20180220 60	1	5	60	0.412688	1.98246
20180220 60	2	1	10	5.84641	9.58867
20180220 60	2	1	20	3.342	9.58814
20180220 60	2	1	30	4.36817	4.17243
20180220 60	2	1	40	-2.06249	-1.37952
20180220 60	2	1	50	3.1942	-1.35606
20180220 60	2	1	60	3.67417	-2.5274
20180220 60	2	6	10	-4.5345	4.5691
20180220 60	2	6	20	2.38278	8.49645
20180220 60	2	6	30	0.155927	1.34322
20180220 60	2	6	40	-0.84623	2.2247
20180220 60	2	6	50	-1.67654	-2.32297
20180220 60	2	6	60	-0.746981	-1.38425
20180220 60	2	8	10	-9.70269	2.51446
20180220 60	2	8	20	16.5827	11.1271
20180220 60	2	8	30	3.3248	3.35842
20180220 60	2	8	40	-4.97302	2.42482
20180220 60	2	8	50	-1.01653	3.97749
20180220 60	2	8	60	0.0088672	0.201603
20180220 60	3	1	10	-33.0431	49.0941
20180220 60	3	1	20	-12.8786	26.4932
20180220 60	3	1	30	7.48931	13.7303
20180220 60	3	1	40	5.20409	9.71415
20180220 60	3	1	50	0.229421	3.27105
20180220 60	3	1	60	-0.449568	2.45368
20180220 60	3	2	10	-1.64828	11.5262
20180220 60	3	2	20	-0.388513	10.5663
20180220 60	3	2	30	-1.26043	-0.601616
20180220 60	3	2	40	-0.211543	0.0294833
20180220 60	3	2	50	1.30583	0.77485
20180220 60	3	2	60	1.23483	1.6017
20180220 60	3	3	10	-11.0554	3.64842
20180220 60	3	3	20	-5.8049	2.47162
20180220 60	3	3	30	-3.49801	5.12676
20180220 60	3	3	40	-3.51271	5.22115
20180220 60	3	3	50	-1.05556	5.9856
20180220 60	3	3	60	-1.13264	3.95982
20180220 60	3	6	10	1.48635	4.61579
20180220 60	3	6	20	-8.89297	0.390172
20180220 60	3	6	30	-15.1734	24.2174
20180220 60	3	6	40	-5.68551	10.5513
20180220 60	3	6	50	-7.47653	0.26525
20180220 60	3	6	60	0.0966505	5.86595
20180220 60	3	7	10	-10.4776	4.43271
20180220 60	3	7	20	-1.70668	3.56114
20180220 60	3	7	30	0.417252	8.24723
20180220 60	3	7	40	4.42116	19.9121
20180220 60	3	7	50	4.32075	-0.0281541
20180220 60	3	7	60	-1.61619	-4.4567
20180220 60	3	8	10	-10.1766	29.6802
20180220 60	3	8	20	-0.850548	2.69215
20180220 60	3	8	30	-6.02743	13.9966
20180220 60	3	8	40	-5.60163	14.9716
20180220 60	3	8	50	3.52157	10.6501
20180220 60	3	8	60	-1.90287	4.34092
20180220 60	3	9	10	-53.9604	19.7996
20180220 60	3	9	20	-6.9947	-0.7801
20180220 60	3	9	30	0.307314	-4.72816
20180220 60	3	9	40	2.24592	1.63169
20180220 60	3	9	50	3.98386	-0.12485
20180220 60	3	9	60	2.95913	1.62255
20180220 60	3	12	10	-0.102687	18.7082
20180220 60	3	12	20	3.96426	2.07286
20180220 60	3	12	30	-2.44763	1.54445
20180220 60	3	12	40	2.12444	0.0481684
20180220 60	3	12	50	0.426989	2.43895
20180220 60	3	12	60	-2.48468	1.9813
20180220 60	4	1	10	-10.8869	27.9309
20180220 60	4	1	20	-5.92418	13.0065
20180220 60	4	1	30	-7.73549	12.1509
20180220 60	4	1	40	-3.42958	6.35395
20180220 60	4	1	50	0.388871	12.2717
20180220 60	4	1	60	2.5842	-1.1544
20180220 60	4	2	10	-14.4684	30.9908
20180220 60	4	2	20	1.30977	3.93687
20180220 60	4	2	30	-0.220688	4.38665
20180220 60	4	2	40	-1.97763	4.41976
20180220 60	4	2	50	-1.22069	10.1978
20180220 60	4	2	60	1.01857	5.14213
20180220 60	4	4	10	-18.8281	12.8879
20180220 60	4	4	20	9.82572	8.23008
20180220 60	4	4	30	0.943212	-2.64175
20180220 60	4	4	40	-1.13869	4.95398
20180220 60	4	4	50	-0.758868	1.78375
20180220 60	4	4	60	0.321093	6.27675
20180220 60	4	10	10	-2.79047	23.713
20180220 60	4	10	20	-9.39545	7.85681
20180220 60	4	10	30	-6.34001	17.1032
20180220 60	4	10	40	-4.81959	11.2899
20180220 60	4	10	50	-1.61745	1.26278
20180220 60	4	10	60	-0.213731	2.70636
20180220 60	4	11	10	-12.3784	23.1912
20180220 60	4	11	20	3.6936	2.63655
20180220 60	4	11	30	2.49045	1.02445
20180220 60	4	11	40	-0.144314	-0.5252
20180220 60	4	11	50	1.69885	0.9153
20180220 60	4	11	60	-0.147591	-0.54085
20180220 60	4	13	10	-16.6022	22.5152
20180220 60	4	13	20	6.72465	-0.00131397
20180220 60	4	13	30	5.34859	4.47155
20180220 60	4	13	40	-0.855254	3.27285
20180220 60	4	13	50	0.105746	6.4432
20180220 60	4	13	60	4.75615	-1.3469
20180220 60	5	2	10	8.33175	12.0024
20180220 60	5	2	20	-7.09346	27.1336
20180220 60	5	2	30	-4.59477	0.197824
20180220 60	5	2	40	-1.41705	4.0147
20180220 60	5	2	50	1.17674	0.7384
20180220 60	5	2	60	-5.30704	6.204
20180220 60	5	4	10	-2.47198	31.9115
20180220 60	5	4	20	-5.60095	9.36098
20180220 60	5	4	30	-1.32254	5.22481
20180220 60	5	4	40	-0.506491	5.2471
20180220 60	5	4	50	-1.15677	1.59769
20180220 60	5	4	60	-0.235227	-1.3208
20180220 60	5	8	10	-10.8102	27.7426
20180220 60	5	8	20	-7.33036	7.94095
20180220 60	5	8	30	-2.08872	2.5169
20180220 60	5	8	40	-0.276736	1.86749
20180220 60	5	8	50	0.984078	1.3156
20180220 60	5	8	60	2.90655	0.39005
20180220 60	5	9	10	-23.7583	34.9813
20180220 60	5	9	20	1.62807	12.8916
20180220 60	5	9	30	-0.38101	4.59185
20180220 60	5	9	40	0.532783	5.33169
20180220 60	5	9	50	-0.261619	-1.31045
20180220 60	5	9	60	1.47662	3.3438
20180220 60	5	11	10	-7.06308	24.7307
20180220 60	5	11	20	-8.07474	7.75508
20180220 60	5	11	30	-2.83947	8.6481
20180220 60	5	11	40	0.139392	-0.83702
20180220 60	5	11	50	3.03199	-3.75465
20180220 60	5	11	60	3.15046	-1.4509
20180220 60	6	2	10	-19.5172	58.0711
20180220 60	6	2	20	-5.90379	27.3172
20180220 60	6	2	30	-8.03132	8.8301
20180220 60	6	2	40	-9.39005	17.6032
20180220 60	6	2	50	-6.39174	4.3319
20180220 60	6	2	60	-4.42606	3.26065
20180220 60	6	6	10	-28.0687	35.2052
20180220 60	6	6	20	-19.2723	30.6142
20180220 60	6	6	30	4.1629	14.9406
20180220 60	6	6	40	3.54933	17.0258
20180220 60	6	6	50	-1.73086	6.87485
20180220 60	6	6	60	-2.47924	7.21795
20180220 60	6	7	10	-1.31964	5.66057
20180220 60	6	7	20	1.93065	26.7232
20180220 60	6	7	30	-2.47945	15.4034
20180220 60	6	7	40	0.708446	4.3266
20180220 60	6	7	50	3.31021	-1.8254
20180220 60	6	7	60	2.83129	-6.6668
20180220 60	6	9	10	-15.2235	28.6944
20180220 60	6	9	20	-9.79499	26.8077
20180220 60	6	9	30	1.3483	15.9546
20180220 60	6	9	40	2.80369	8.2322
20180220 60	6	9	50	-0.973866	-2.35088
20180220 60	6	9	60	-0.913147	6.3964
20180220 60	6	19	10	-28.9239	21.7379
20180220 60	6	19	20	-4.69737	10.012
20180220 60	6	19	30	3.11397	6.40675
20180220 60	6	19	40	5.68707	5.68434e-15
20180220 60	6	19	50	6.76513	-0.2653
20180220 60	6	19	60	3.20203	-1.2845
20180220 60	6	21	10	-6.12026	7.86817
20180220 60	6	21	20	-5.92398	2.3394
20180220 60	6	21	30	-1.13708	2.26735
20180220 60	6	21	40	2.57075	3.99895
20180220 60	6	21	50	5.60521	1.96045
20180220 60	6	21	60	3.71103	2.8705
20180220 60	3	11	10	6.9492	5.14272
20180220 60	3	11	20	-2.60015	4.18764
20180220 60	3	11	30	-4.7788	4.75305
20180220 60	3	11	40	0.682074	-0.970043
20180220 60	3	11	50	-1.22692	3.45396
20180220 60	3	11	60	-0.490742	1.21685
20180220 60	5	5	10	6.30648	5.46919
20180220 60	5	5	20	-2.11311	1.21841
20180220 60	5	5	30	0.391415	3.74425
20180220 60	5	5	40	3.99805	-0.40565
20180220 60	5	5	50	2.98134	-1.73175
20180220 60	5	5	60	-2.97873	7.0517
20180220 60	6	1	10	17.2752	10.3947
20180220 60	6	1	20	-4.50577	19.4698
20180220 60	6	1	30	1.17703	3.32825
20180220 60	6	1	40	-0.0394614	1.97605
20180220 60	6	1	50	-4.26205	2.5014
20180220 60	6	1	60	4.5214	0.1507
20180220 60	6	13	10	5.74956	3.99193
20180220 60	6	13	20	-5.38249	15.766
20180220 60	6	13	30	0.791301	1.3884
20180220 60	6	13	40	-0.562868	5.04435
20180220 60	6	13	50	0.785063	1.04005
20180220 60	6	13	60	1.8856	-2.9433
20180220 60	6	17	10	14.1385	22.7947
20180220 60	6	17	20	-11.2988	14.9145
20180220 60	6	17	30	-2.10496	3.13055
20180220 60	6	17	40	0.662772	4.1291
20180220 60	6	17	50	1.16774	1.85655
20180220 60	6	17	60	-2.03846	-1.1129
20180220 60	3	4	10	14.4655	7.99635
20180220 60	3	4	20	-9.85272	18.4567
20180220 60	3	4	30	-8.69706	2.17642
20180220 60	3	4	40	-5.63229	-2.58933
20180220 60	3	4	50	-4.34701	2.3973
20180220 60	3	4	60	-2.47687	8.32055
20180220 60	3	10	10	4.00544	6.64437
20180220 60	3	10	20	-9.83299	9.7298
20180220 60	3	10	30	-2.50764	13.7627
20180220 60	3	10	40	-0.526636	-0.780575
20180220 60	3	10	50	1.02864	1.02792
20180220 60	3	10	60	-1.83587	2.74055
20180220 60	4	5	10	-3.65028	23.1713
20180220 60	4	5	20	-15.3599	31.7964
20180220 60	4	5	30	-0.578972	9.94348
20180220 60	4	5	40	1.07661	6.76947
20180220 60	4	5	50	1.35371	3.5622
20180220 60	4	5	60	1.71435	5.3147
20180220 60	4	8	10	6.14141	5.36937
20180220 60	4	8	20	-7.82802	22.3264
20180220 60	4	8	30	-12.8563	12.3143
20180220 60	4	8	40	-0.520133	8.50376
20180220 60	4	8	50	-2.18591	0.477389
20180220 60	4	8	60	-1.73639	7.9825
20180220 60	4	9	10	8.8205	9.6795
20180220 60	4	9	20	-9.02312	8.2238
20180220 60	4	9	30	-4.33133	9.13035
20180220 60	4	9	40	-0.316236	1.68745
20180220 60	4	9	50	3.28695	-0.16645
20180220 60	4	9	60	1.82781	1.00365
20180220 60	4	12	10	-0.816788	1.24293
20180220 60	4	12	20	-5.1078	6.91877
20180220 60	4	12	30	-3.97462	11.6347
20180220 60	4	12	40	-3.87424	2.09575
20180220 60	4	12	50	1.457	-2.2465
20180220 60	4	12	60	1.45757	-0.67605
20180220 60	5	1	10	-1.74133	5.20532
20180220 60	5	1	20	-8.65244	27.3962
20180220 60	5	1	30	-8.81309	6.85915
20180220 60	5	1	40	-4.6236	3.1878
20180220 60	5	1	50	-1.66799	1.1804
20180220 60	5	1	60	1.02015	-1.285
20180220 60	5	3	10	-0.690116	13.0281
20180220 60	5	3	20	-3.32307	9.28938
20180220 60	5	3	30	0.699745	4.0719
20180220 60	5	3	40	-0.743594	6.12199
20180220 60	5	3	50	0.0143661	0.45755
20180220 60	5	3	60	-0.657479	1.65375
20180220 60	5	10	10	3.29248	6.11475
20180220 60	5	10	20	-4.78896	14.6181
20180220 60	5	10	30	-5.21511	0.4264
20180220 60	5	10	40	-1.19345	1.3833
20180220 60	5	10	50	1.52543	0.52
20180220 60	5	10	60	1.35099	-0.68125
20180220 60	5	12	10	3.98027	25.5542
20180220 60	5	12	20	-7.81065	6.36
20180220 60	5	12	30	-2.77708	6.31374
20180220 60	5	12	40	-0.0652976	4.25385
20180220 60	5	12	50	2.12368	5.5903
20180220 60	5	12	60	-0.345795	1.01405
20180220 60	5	13	10	-3.51262	27.774
20180220 60	5	13	20	-19.4689	13.1776
20180220 60	5	13	30	-3.82425	6.93725
20180220 60	5	13	40	-2.41229	-1.42485
20180220 60	5	13	50	1.07475	1.5133
20180220 60	5	13	60	3.01064	-2.9485
20180220 60	6	5	10	-7.55368	30.461
20180220 60	6	5	20	-7.76893	10.9107
20180220 60	6	5	30	-1.32794	5.33873
20180220 60	6	5	40	2.05623	11.7892
20180220 60	6	5	50	0.0154598	6.68245
20180220 60	6	5	60	1.63331	1.32085
20180220 60	6	4	10	-3.21714	36.3731
20180220 60	6	4	20	-6.57535	22.7287
20180220 60	6	4	30	0.47427	3.67203
20180220 60	6	4	40	0.204323	8.52335
20180220 60	6	4	50	-0.133846	-10.879
20180220 60	6	4	60	1.48786	4.12385
20180220 60	6	8	10	-4.23905	32.3767
20180220 60	6	8	20	-9.66258	12.4235
20180220 60	6	8	30	1.70342	6.83325
20180220 60	6	8	40	2.21716	-4.3838
20180220 60	6	8	50	-0.322012	0.9985
20180220 60	6	8	60	0.785404	-0.0052
20180220 60	6	10	10	-3.06923	30.8944
20180220 60	6	10	20	-1.9831	15.7186
20180220 60	6	10	30	5.30806	9.3449
20180220 60	6	10	40	4.54752	7.34805
20180220 60	6	10	50	2.00824	3.4738
20180220 60	6	10	60	2.26278	3.505
20180220 60	6	11	10	-7.19297	15.8669
20180220 60	6	11	20	-17.6441	28.17
20180220 60	6	11	30	-4.51787	5.59555
20180220 60	6	11	40	0.520949	17.7954
20180220 60	6	11	50	2.46346	-1.4353
20180220 60	6	11	60	2.42974	-0.43165
20180220 60	6	12	10	-0.596706	24.8998
20180220 60	6	12	20	-13.3923	13.1492
20180220 60	6	12	30	0.113358	7.28045
20180220 60	6	12	40	1.0174	7.47795
20180220 60	6	12	50	0.380095	2.959
20180220 60	6	12	60	0.911332	-4.92465
20180220 60	6	14	10	-0.845213	15.4487
20180220 60	6	14	20	-11.4025	13.6304
20180220 60	6	14	30	-5.87513	6.01155
20180220 60	6	14	40	0.661703	3.6975
20180220 60	6	14	50	2.4547	3.80135
20180220 60	6	14	60	2.39701	0.6188
20180220 60	6	16	10	-3.58462	25.4534
20180220 60	6	16	20	-4.89584	10.5826
20180220 60	6	16	30	-0.714299	4.02437
20180220 60	6	16	40	2.20584	0.2653
20180220 60	6	16	50	0.686401	1.2377
20180220 60	6	16	60	-1.27138	2.18581
20180220 60	6	18	10	-0.980872	11.8421
20180220 60	6	18	20	-5.47392	13.8867
20180220 60	6	18	30	-1.72751	10.5805
20180220 60	6	18	40	0.530243	5.40182
20180220 60	6	18	50	2.83303	0.88925
20180220 60	6	18	60	0.495022	4.1031
20180220 60	6	20	10	3.43876	8.58966
20180220 60	6	20	20	-14.4772	-2.83468
20180220 60	6	20	30	-1.35727	6.88525
20180220 60	6	20	40	-1.08065	0.97235
20180220 60	6	20	50	1.14536	1.47165
20180220 60	6	20	60	0.188884	-6.1468
20180220 60	6	22	10	5.99575	6.63269
20180220 60	6	22	20	-4.75751	26.1621
20180220 60	6	22	30	-5.60542	13.7505
20180220 60	6	22	40	-0.835621	2.51695
20180220 60	6	22	50	0.104561	-0.9464
20180220 60	6	22	60	-1.95581	1.3781
20180220 60	1	6	10	0.117095	-1.54088
20180220 60	1	6	20	16.9014	4.22077
20180220 60	1	6	30	5.45849	3.09063
20180220 60	1	6	40	-1.93778	2.2489
20180220 60	1	6	50	2.50097	2.27526
20180220 60	1	6	60	3.71855	0.0973343
20180220 60	1	7	10	3.87451	3.74117
20180220 60	1	7	20	-1.5563	2.64214
20180220 60	1	7	30	-1.93292	1.92977
20180220 60	1	7	40	2.10845	0.682237
20180220 60	1	7	50	0.790237	0.995674
20180220 60	1	7	60	1.09726	-1.56064
20180220 60	1	9	10	0.248038	#DIV/0!
20180220 60	1	9	20	4.17411	-0.73109
20180220 60	1	9	30	-5.89189	1.36383
20180220 60	1	9	40	1.55812	0.988539
20180220 60	1	9	50	0.0767638	2.93497
20180220 60	1	9	60	1.42674	0.1508
20180220 60	2	9	10	-28.4593	1.81532
20180220 60	2	9	20	2.49568	0.775671
20180220 60	2	9	30	2.90474	2.37094
20180220 60	2	9	40	16.9368	1.26253
20180220 60	2	9	50	0.480038	-1.67208
20180220 60	2	9	60	0.59222	-1.433
20180220 60	3	3	10	5.05586	2.13463
20180220 60	3	3	20	3.9611	18.2945
20180220 60	3	3	30	-4.53097	-0.2808
20180220 60	3	3	40	1.32097	1.13389
20180220 60	3	3	50	1.97612	-2.54217
20180220 60	3	3	60	-1.13888	1.18045
20180220 60	4	6	10	4.83178	2.98516
20180220 60	4	6	20	-8.98486	1.46744
20180220 60	4	6	30	-1.29682	2.1478
20180220 60	4	6	40	3.18234	1.76861
20180220 60	4	6	50	8.69635	10.3142
20180220 60	4	6	60	-0.46433	5.08075
20180220 60	4	7	10	0.969188	3.1048
20180220 60	4	7	20	-11.3683	2.06083
20180220 60	4	7	30	0.268963	-1.34165
20180220 60	4	7	40	2.95486	2.8802
20180220 60	4	7	50	-6.1463	5.22635
20180220 60	4	7	60	14.4104	19.08
20180220 60	5	7	10	-16.33	13.9822
20180220 60	5	7	20	-16.2379	-0.5824
20180220 60	5	7	30	-1.00002	0.86335
20180220 60	5	7	40	0.23923	-0.624
20180220 60	5	7	50	2.594	-0.924821
20180220 60	5	7	60	3.01379	-3.1254

## Sheet: 20180308
	pos	cell	10min slope absolute	dV/dt	dA/dt
20180308	4	1	10	-1.06439	0.537366
20180308	4	1	20	-4.01435	9.73006
20180308	4	1	30	-4.96002	32.2835
20180308	4	1	40	-3.06618	13.6664
20180308	4	1	50	2.97175	-3.89696
20180308	4	2	10	-14.281	14.6129
20180308	4	2	20	-8.62771	4.55547
20180308	4	2	30	-4.27479	#DIV/0!
20180308	4	2	40	-2.13785	2.96418
20180308	4	2	50	0.330997	10.3338
20180308	4	3	10	-2.35541	22.4966
20180308	4	3	20	-0.817695	4.79915
20180308	4	3	30	5.40258	-16.251
20180308	4	3	40	4.77655	-1.51849
20180308	4	3	50	4.26064	-6.20571
20180308	4	4	10	-0.297695	13.3492
20180308	4	4	20	-0.534987	12.6021
20180308	4	4	30	11.6565	#DIV/0!
20180308	4	4	40	13.1217	#DIV/0!
20180308	4	4	50	1.94588	-0.936056
20180308	4	5	10	-5.29015	11.5228
20180308	4	5	20	-5.8316	20.9399
20180308	4	5	30	-5.98041	11.7007
20180308	4	5	40	0.0205486	1.90607
20180308	4	5	50	3.84868	-3.41487
20180308	4	6	10	-22.444	48.8328
20180308	4	6	20	7.92756	41.8521
20180308	4	6	30	4.70482	26.1204
20180308	4	6	40	1.72879	32.1171
20180308	4	6	50	2.56091	-2.79083
20180308	4	7	10	5.89418	16.173
20180308	4	7	20	-2.80495	2.80817
20180308	4	7	30	-5.42073	4.53595
20180308	4	7	40	-2.52149	10.3798
20180308	4	7	50	-3.2177	-4.07358
20180308	4	8	10	-2.95509	5.40092
20180308	4	8	20	-0.919746	7.10671
20180308	4	8	30	1.11541	-0.0520031
20180308	4	8	40	-1.98149	7.40524
20180308	4	8	50	-0.278736	-4.95763
20180308	4	9	10	-16.6109	23.8114
20180308	4	9	20	-1.38913	4.05198
20180308	4	9	30	4.45472	0.0180419
20180308	4	9	40	5.64853	-2.64176
20180308	4	9	50	-1.2712	-1.56009
20180308	4	12	10	-18.2536	12.1063
20180308	4	12	20	-10.1351	21.3699
20180308	4	12	30	-1.82615	14.4569
20180308	4	12	40	3.43183	3.09939
20180308	4	12	50	3.68306	-17.7157
20180308	5	1	10	-6.468	2.21013
20180308	5	1	20	-6.23294	16.3368
20180308	5	1	30	-5.82409	4.55547
20180308	5	1	40	-4.50898	8.71572
20180308	5	1	50	0.5185	1.21687
20180308	5	2	10	-1.32989	11.9607
20180308	5	2	20	-5.36225	21.4246
20180308	5	2	30	-0.175117	4.34491
20180308	5	2	40	1.32533	1.80971
20180308	5	2	50	1.2131	-4.21225
20180308	5	4	10	-9.38784	20.4346
20180308	5	4	20	-5.16411	29.2469
20180308	5	4	30	6.32701	5.05836
20180308	5	4	40	8.00246	8.58052
20180308	5	4	50	5.78391	15.4722
20180308	5	5	10	-14.8873	24.7163
20180308	5	5	20	-7.08442	13.7649
20180308	5	5	30	-0.670562	2.14253
20180308	5	5	40	5.29246	2.16333
20180308	5	5	50	11.2002	-1.23074
20180308	5	7	10	-6.97773	10.3232
20180308	5	7	20	-1.17595	22.4939
20180308	5	7	30	-5.94394	5.76195
20180308	5	7	40	-0.151116	1.58062
20180308	5	7	50	1.6456	1.43875
20180308	5	6	10	1.52208	2.67663
20180308	5	6	20	2.22763	10.6433
20180308	5	6	30	4.58837	12.1074
20180308	5	6	40	6.14123	-3.33017
20180308	5	6	50	8.2994	-18.385
20180308	5	8	10	-0.845233	6.31838
20180308	5	8	20	1.64908	6.35499
20180308	5	8	30	3.40584	10.2308
20180308	5	8	40	0.811643	16.199
20180308	5	8	50	-2.83902	-0.354117
20180308	5	9	10	-15.4962	11.5932
20180308	5	9	20	-9.84982	14.6129
20180308	5	9	30	-0.129131	-4.24345
20180308	5	9	40	2.17255	1.28968
20180308	5	9	50	3.54963	-5.23498
20180308	5	10	10	1.53843	8.02582
20180308	5	10	20	-0.285752	5.34508
20180308	5	10	30	2.55847	10.0826
20180308	5	10	40	3.41185	6.84361
20180308	5	10	50	4.8646	-7.47112
20180308	5	11	10	-9.42108	27.3814
20180308	5	11	20	0.636071	14.2073
20180308	5	11	30	2.34824	#DIV/0!
20180308	5	11	40	2.70706	2.83788
20180308	5	11	50	-0.145136	0.398691
20180308	5	12	10	-2.41222	7.16185
20180308	5	12	20	-1.28858	0.546033
20180308	5	12	30	3.44326	8.90987
20180308	5	12	40	-1.19884	10.506
20180308	5	12	50	-2.18718	0.849384
20180308	5	13	10	-11.5565	28.8201
20180308	5	13	20	-10.0669	15.0316
20180308	5	13	30	-0.140158	-1.81268
20180308	5	13	40	1.80646	-0.894454
20180308	5	13	50	5.64042	0.797381
20180308	6	1	10	-3.87735	16.6089
20180308	6	1	20	1.55628	22.3093
20180308	6	1	30	3.5021	-1.7265
20180308	6	1	40	2.96253	-6.59502
20180308	6	1	50	1.52352	-11.0247
20180308	6	2	10	-7.13101	19.8034
20180308	6	2	20	-5.84476	24.1003
20180308	6	2	30	3.3846	33.5247
20180308	6	2	40	2.93205	20.0296
20180308	6	2	50	2.98492	8.66223
20180308	6	3	10	-11.1167	3.25143
20180308	6	3	20	-5.65109	27.3276
20180308	6	3	30	-4.55281	#DIV/0!
20180308	6	3	40	-2.64371	0.861766
20180308	6	3	50	-1.69099	8.42451
20180308	6	4	10	-1.91764	3.98895
20180308	6	4	20	-1.5302	8.00848
20180308	6	4	30	-0.211595	#DIV/0!
20180308	6	4	40	6.55683	-0.27735
20180308	6	4	50	9.72621	-8.3725
20180308	6	5	10	-5.45645	21.694
20180308	6	5	20	-2.98199	#DIV/0!
20180308	6	5	30	-0.772084	1.56009
20180308	6	5	40	1.9326	#DIV/0!
20180308	6	5	50	2.16105	2.89484
20180308	6	6	10	-17.2114	12.2571
20180308	6	6	20	-5.44752	20.6279
20180308	6	6	30	2.70328	4.87344
20180308	6	6	40	6.42556	5.44993
20180308	6	6	50	7.53669	-6.32705
20180308	6	7	10	-0.485717	5.44795
20180308	6	7	20	-0.29862	#DIV/0!
20180308	6	7	30	-2.72769	2.99538
20180308	6	7	40	-0.847261	#DIV/0!
20180308	6	7	50	-1.56137	12.3421
20180308	6	8	10	-1.00609	26.9039
20180308	6	8	20	4.22143	0.624038
20180308	6	8	30	-0.899107	1.76183
20180308	6	8	40	0.78208	5.09631
20180308	6	8	50	-0.558801	-0.520031
20180308	6	9	10	-20.804	5.81915
20180308	6	9	20	-1.94498	11.6777
20180308	6	9	30	-7.40709	7.99548
20180308	6	9	40	-3.37756	#DIV/0!
20180308	6	9	50	-4.20252	2.14513
20180308	6	10	10	-16.171	25.9138
20180308	6	10	20	-1.88453	3.06818
20180308	6	10	30	7.34631	#DIV/0!
20180308	6	10	40	1.94511	5.0183
20180308	6	10	50	8.88171	7.46245
20180308	6	11	10	-0.673778	18.0199
20180308	6	11	20	-6.57994	11.5257
20180308	6	11	30	-1.91611	1.83744
20180308	6	11	40	2.06323	#DIV/0!
20180308	6	11	50	2.43312	6.11903
20180308	6	12	10	-4.20079	12.7549
20180308	6	12	20	-4.67436	4.81549
20180308	6	12	30	-3.57145	#DIV/0!
20180308	6	12	40	-3.4529	8.54585
20180308	6	12	50	-0.523325	6.76041
20180308	7	1	10	-23.426	43.3785
20180308	7	1	20	-0.167021	18.5911
20180308	7	1	30	2.48537	-1.7057
20180308	7	1	40	1.89635	0.0208012
20180308	7	1	50	4.71816	-13.8848
20180308	7	2	10	3.09651	#DIV/0!
20180308	7	2	20	0.985336	3.90023
20180308	7	2	30	0.455011	19.1111
20180308	7	2	40	-1.85406	4.54231
20180308	7	2	50	1.04728	3.17219
20180308	7	5	10	-2.62484	7.8022
20180308	7	5	20	-3.73737	#DIV/0!
20180308	7	5	30	-4.93069	16.6826
20180308	7	5	40	-6.70509	7.38444
20180308	7	5	50	1.69528	2.11479
20180308	7	6	10	11.1423	8.19022
20180308	7	6	20	8.65267	5.98036
20180308	7	6	30	3.20554	#DIV/0!
20180308	7	6	40	0.170632	8.49384
20180308	7	6	50	-0.810976	1.41709
20180308	7	7	10	5.92505	7.99108
20180308	7	7	20	-8.85217	37.5437
20180308	7	7	30	-2.32621	4.29079
20180308	7	7	40	-0.869492	14.164
20180308	7	7	50	1.75699	-1.45609
20180308	7	11	10	7.39722	8.17489
20180308	7	11	20	4.53749	10.2186
20180308	7	11	30	3.58887	3.17219
20180308	7	11	40	0.903597	5.81268
20180308	7	11	50	0.920801	9.75579
20180308	7	12	10	-0.144676	13.2551
20180308	7	12	20	-7.4065	21.8519
20180308	7	12	30	2.34413	24.2161
20180308	7	12	40	6.00693	8.11249
20180308	7	12	50	3.36944	-1.00539
20180308	7	13	10	-3.22746	9.94891
20180308	7	13	20	-5.24758	19.7208
20180308	7	13	30	-3.24962	11.6537
20180308	7	13	40	2.47751	9.76173
20180308	7	13	50	2.16738	3.75125
20180308	7	14	10	-8.60965	17.4494
20180308	7	14	20	-1.99759	-3.95224
20180308	7	14	30	-2.51473	#DIV/0!
20180308	7	14	40	5.08609	-3.06818
20180308	7	14	50	7.11676	-4.19492
20180308	7	15	10	-7.11891	27.5669
20180308	7	15	20	-11.7433	18.9991
20180308	7	15	30	1.1325	8.90554
20180308	7	15	40	4.58775	5.57473
20180308	7	15	50	0.813376	5.79835
20180308	8	1	10	-20.9697	37.1914
20180308	8	1	20	3.35349	30.1212
20180308	8	1	30	5.71344	5.25762
20180308	8	1	40	2.39488	9.67258
20180308	8	1	50	2.42586	-1.17874
20180308	8	2	10	-8.98603	7.36884
20180308	8	2	20	-6.1778	11.0663
20180308	8	2	30	-4.04042	5.32165
20180308	8	2	40	1.13726	-8.1896
20180308	8	2	50	4.46566	-3.79026
20180308	8	3	10	-3.01696	5.46223
20180308	8	3	20	-0.633972	#DIV/0!
20180308	8	3	30	-2.84025	13.2558
20180308	8	3	40	-3.92705	#DIV/0!
20180308	8	3	50	-2.11589	5.91721
20180308	8	4	10	-3.63498	15.1854
20180308	8	4	20	-6.26115	8.46165
20180308	8	4	30	-0.74672	-3.41141
20180308	8	4	40	-0.316342	#DIV/0!
20180308	8	4	50	1.93767	2.23699
20180308	8	5	10	-1.70866	11.2587
20180308	8	5	20	-4.73852	32.4117
20180308	8	5	30	-0.888562	13.5
20180308	8	5	40	0.144265	10.9987
20180308	8	5	50	-1.90975	-3.53621
20180308	8	6	10	-6.92118	15.0965
20180308	8	6	20	-6.90312	20.4736
20180308	8	6	30	3.13798	5.76195
20180308	8	6	40	7.06158	6.07396
20180308	8	6	50	7.98032	-7.90448
20180308	8	7	10	-5.61519	2.86017
20180308	8	7	20	-3.05478	10.6606
20180308	8	7	30	-2.5817	2.80817
20180308	8	7	40	-2.88053	6.96842
20180308	8	7	50	2.27545	-5.8875
20180308	8	8	10	-5.96082	23.8296
20180308	8	8	20	-3.31211	11.1087
20180308	8	8	30	2.47687	5.30432
20180308	8	8	40	4.13134	1.80277
20180308	8	8	50	5.32526	-8.59092
20180308	8	9	10	-14.1375	10.6762
20180308	8	9	20	-14.6776	19.2932
20180308	8	9	30	-16.7423	28.881
20180308	8	9	40	-4.76703	22.9498
20180308	8	9	50	7.79017	2.44415
20180308	9	1	10	3.66811	7.69126
20180308	9	1	20	-3.80253	2.00012
20180308	9	1	30	-1.31002	2.54568
20180308	9	1	40	2.24596	#DIV/0!
20180308	9	1	50	1.16964	-1.45182
20180308	9	2	10	-0.0887645	8.11249
20180308	9	2	20	-3.26367	10.333
20180308	9	2	30	-3.71293	10.0144
20180308	9	2	40	1.41672	11.9607
20180308	9	2	50	11.4135	6.66407
20180308	9	3	10	-4.11174	9.9222
20180308	9	3	20	-5.68356	8.84053
20180308	9	3	30	-4.13225	5.61378
20180308	9	3	40	-2.85166	3.19909
20180308	9	3	50	4.01611	6.15547
20180308	9	7	10	-11.9551	35.2421
20180308	9	7	20	2.80134	14.1003
20180308	9	7	30	1.46324	#DIV/0!
20180308	9	7	40	4.04052	5.56433
20180308	9	7	50	1.17356	-5.74115
20180308	9	9	10	6.68182	47.3852
20180308	9	9	20	-11.2087	40.63
20180308	9	9	30	-17.2474	32.11
20180308	9	9	40	-11.6825	8.2685
20180308	9	9	50	5.32263	-7.08777
20180308	9	11	10	-4.65523	11.2275
20180308	9	11	20	4.95713	18.8843
20180308	9	11	30	5.6734	7.71726
20180308	9	11	40	3.62163	0.702042
20180308	9	11	50	1.47248	14.1582
20180308	9	13	10	4.8401	16.0908
20180308	9	13	20	-3.69488	19.6202
20180308	9	13	30	-1.5433	3.68146
20180308	9	13	40	2.07625	#DIV/0!
20180308	9	13	50	1.54611	-1.08184
20180308	9	14	10	1.436	4.5188
20180308	9	14	20	1.80985	5.64703
20180308	9	14	30	2.13463	4.78429
20180308	9	14	40	-2.75452	2.99602
20180308	9	14	50	0.0574958	5.44993
20180308	10	1	10	-15.1012	16.0274
20180308	10	1	20	-9.38525	18.9707
20180308	10	1	30	-5.04592	22.8274
20180308	10	1	40	4.74593	9.77128
20180308	10	1	50	8.43874	2.53082
20180308	10	2	10	-6.78314	9.27764
20180308	10	2	20	-3.75034	10.5074
20180308	10	2	30	-1.17365	#DIV/0!
20180308	10	2	40	0.8343	3.28363
20180308	10	2	50	0.799621	-5.18298
20180308	10	4	10	-9.44295	16.7406
20180308	10	4	20	-7.57634	7.39633
20180308	10	4	30	0.576768	8.77553
20180308	10	4	40	4.75004	2.39214
20180308	10	4	50	7.25869	-2.64176
20180308	10	6	10	-13.9187	22.6006
20180308	10	6	20	-11.2906	4.87789
20180308	10	6	30	-4.83233	8.47038
20180308	10	6	40	1.40501	11.5744
20180308	10	6	50	1.88462	3.86903
20180308	10	7	10	-10.6652	24.0341
20180308	10	7	20	4.37548	8.63453
20180308	10	7	30	3.3214	9.36056
20180308	10	7	40	0.948845	-1.75077
20180308	10	7	50	-0.932674	-1.40408
20180308	10	9	10	-0.378524	7.01907
20180308	10	9	20	-4.49741	12.0914
20180308	10	9	30	-1.38062	22.9854
20180308	10	9	40	-1.02228	-2.65638
20180308	10	9	50	-0.707954	-1.89758
20180308	10	10	10	-8.17117	13.132
20180308	10	10	20	-8.35451	8.39408
20180308	10	10	30	-2.12944	4.74679
20180308	10	10	40	-0.37692	8.58052
20180308	10	10	50	0.825878	0.884053
20180308	10	11	10	-24.9213	26.3136
20180308	10	11	20	-7.04284	17.9675
20180308	10	11	30	8.90936	8.91854
20180308	10	11	40	10.3067	23.9422
20180308	10	11	50	7.6997	8.07088
20180308	10	12	10	-12.2912	31.6629
20180308	10	12	20	4.87715	22.448
20180308	10	12	30	1.69584	11.1287
20180308	10	12	40	-0.903778	15.4345
20180308	10	12	50	0.368209	12.6888
20180308	10	13	10	-5.87783	10.6152
20180308	10	13	20	-1.7877	23.1934
20180308	10	13	30	-0.00575497	5.59034
20180308	10	13	40	7.09698	2.84496
20180308	10	13	50	-0.607307	23.8044
20180308	10	14	10	-7.59557	4.66988
20180308	10	14	20	-4.46614	6.07917
20180308	10	14	30	-4.68672	17.5979
20180308	10	14	40	-2.1582	2.95565
20180308	10	14	50	4.8226	-1.9204
20180308	10	15	10	-11.5193	19.5193
20180308	10	15	20	2.13004	17.1695
20180308	10	15	30	3.31563	9.13175
20180308	10	15	40	2.358	2.60016
20180308	10	15	50	1.71061	5.75126
20180308	11	1	10	-2.91061	9.68298
20180308	11	1	20	-5.2936	7.57173
20180308	11	1	30	-1.69419	-2.84284
20180308	11	1	40	2.70888	-1.04006
20180308	11	1	50	-0.144347	7.13243
20180308	11	2	10	-16.0851	28.1753
20180308	11	2	20	0.896212	8.2945
20180308	11	2	30	5.96793	9.79875
20180308	11	2	40	5.1294	-1.6225
20180308	11	2	50	0.0846986	11.3001
20180308	11	3	10	0.226163	18.9102
20180308	11	3	20	-1.3925	21.7789
20180308	11	3	30	3.53199	8.11249
20180308	11	3	40	6.04856	2.61749
20180308	11	3	50	1.76886	-3.95224
20180308	11	4	10	-6.752	9.53217
20180308	11	4	20	-4.32581	18.7887
20180308	11	4	30	-7.431	23.183
20180308	11	4	40	-3.72805	0.894454
20180308	11	4	50	0.00461085	6.32358
20180308	11	5	10	-1.82028	21.2808
20180308	11	5	20	-5.6005	16.6912
20180308	11	5	30	2.36042	1.0121
20180308	11	5	40	1.40193	1.40408
20180308	11	5	50	-1.98385	4.73369
20180308	11	6	10	-2.19475	7.04626
20180308	11	6	20	-5.32258	6.73961
20180308	11	6	30	-3.56925	4.07482
20180308	11	6	40	-1.75264	3.3542
20180308	11	6	50	7.87114	-4.08716
20180308	11	7	10	-12.7876	14.4863
20180308	11	7	20	-0.16906	4.43067
20180308	11	7	30	3.56246	#DIV/0!
20180308	11	7	40	4.68832	7.53005
20180308	11	7	50	3.24197	2.18413
20180308	11	8	10	-15.4584	23.9526
20180308	11	8	20	0.275483	20.3553
20180308	11	8	30	2.54446	11.9954
20180308	11	8	40	2.27276	4.9663
20180308	11	8	50	2.09124	-3.6572
20180308	11	9	10	-8.04002	15.5069
20180308	11	9	20	-6.25964	14.3754
20180308	11	9	30	0.848084	4.55027
20180308	11	9	40	4.14801	-0.104006
20180308	11	9	50	2.81622	-2.26214
20180308	11	11	10	-5.47251	9.68312
20180308	11	11	20	1.44288	4.29829
20180308	11	11	30	1.14485	6.34438
20180308	11	11	40	1.22358	2.54951
20180308	11	11	50	1.35315	6.85141
20180308	11	12	10	-4.41184	38.7458
20180308	11	12	20	-5.66358	14.5374
20180308	11	12	30	-0.0647242	20.3644
20180308	11	12	40	0.41713	#DIV/0!
20180308	11	12	50	-4.34811	1.6901
20180308	11	13	10	-11.3228	30.1375
20180308	11	13	20	-1.91207	7.48845
20180308	11	13	30	8.44912	-8.92374
20180308	11	13	40	2.87333	#DIV/0!
20180308	11	13	50	10.3741	0.995488

## Sheet: all
experiment	pos	cell	10min slope absolute	dV/dt	dA/dt				-5.8522	15.3429			-3.4366	11.9073			-0.771473	7.24233			1.13472	4.74314			1.65803	1.56795			1.0704	2.0486				-5.8522	15.3429			-3.4366	11.9073			-0.771473	7.24233			1.13472	4.74314
20180220 60	1	6	10	0.117095	-1.54088				9.06788	11.3628			5.94077	9.46058			4.8712	7.89745			4.11272	5.83943			3.9656	5.57655			2.95698	4.65114				9.06788	11.3628			5.94077	9.46058			4.8712	7.89745			4.11272	5.83943
20180308	4	1	10	-1.06439	0.537366				195	195			194	194			185	185			184	184			195	195			109	109
20180220 30	5	9	10	-10.0624	0.567032				0.649365	0.813704			0.426522	0.67923			0.358138	0.580632			0.303194	0.430488			0.283983	0.399345			0.283227	0.445498
20180220 30	5	5	10	-1.53828	0.826354			10	0.117095	-1.54088		20	-1.99759	-3.95224		30	5.40258	-16.251		40	1.13726	-8.1896		50	8.2994	-18.385		60	2.10553	-13.6874			interval	dV/dt	stdev	dA/dt	stdev	area from average curves									t	A	stdev
20180220 30	6	9	10	-6.81767	1.1501			10	-1.06439	0.537366		20	-14.4772	-2.83468		30	8.44912	-8.92374		40	2.96253	-6.59502		50	3.68306	-17.7157		60	2.83129	-6.6668			0-10	-5.8522	9.06788	15.3429	11.3628	209.968	122.097								0	30.7384	17.0021
20180220 60	4	12	10	-0.816788	1.24293			10	-10.0624	0.567032		20	-6.9947	-0.7801		30	0.307314	-4.72816		40	2.21716	-4.3838		50	4.71816	-13.8848		60	0.188884	-6.1468			10-20	-3.4366	5.94077	11.9073	9.46058	351.97	166.286								1	49.4132	21.9435
20180220 30	4	5	10	-2.07509	1.65276			10	-1.53828	0.826354		20	4.17411	-0.73109		30	-0.129131	-4.24345		40	6.14123	-3.33017		50	1.52352	-11.0247		60	0.911332	-4.92465			20-30	-0.771473	4.8712	7.24233	7.89745	409.357	187.02								2	70.2702	37.4611
20180220 60	2	9	10	-28.4593	1.81532			10	-6.81767	1.1501		20	-0.0623043	-0.653857		30	2.59746	-4.08027		40	-5.40793	-3.12535		50	-0.133846	-10.879		60	-1.61619	-4.4567			30-40	1.13472	4.11272	4.74314	5.83943	457.526	219.196								3	80.794	49.4268
20180220 60	3	3	10	5.05586	2.13463			10	-0.816788	1.24293		20	-16.2379	-0.5824		30	-0.74672	-3.41141		40	5.08609	-3.06818		50	5.32526	-8.59092		60	3.01379	-3.1254			40-50	1.65803	3.9656	1.56795	5.57655	433.161	191.205								4	98.3835	55.1492
20180220 30	5	1	10	-2.72167	2.13938			10	-2.07509	1.65276		20	-2.08396	-0.474318		30	-1.69419	-2.84284		40	-0.49408	-2.85108		50	9.72621	-8.3725		60	3.45881	-3.09512			50-60	1.0704	2.95698	2.0486	4.65114	550.205	277.935								5	111.591	74.201
20180308	5	1	10	-6.468	2.21013			10	-28.4593	1.81532		20	-6.77358	-0.314988		30	0.943212	-2.64175		40	-1.02228	-2.65638		50	7.98032	-7.90448		60	1.46194	-3.037					sterr		sterr										6	135.333	87.5464
20180220 30	4	3	10	-6.38204	2.37918			10	5.05586	2.13463		20	0.385717	-0.0957212		30	0.656328	-2.13185		40	5.64853	-2.64176		50	4.8646	-7.47112		60	3.01064	-2.9485			0-10	-5.8522	0.649365	15.3429	0.813704										7	153.692	92.9948
20180220 30	3	8	10	-2.24131	2.51263			10	-2.72167	2.13938		20	6.72465	-0.00131397		30	5.585	-1.99848		40	-5.63229	-2.58933		50	5.32263	-7.08777		60	1.8856	-2.9433			10-20	-3.4366	0.426522	11.9073	0.67923										8	179.769	107.3
20180220 60	2	8	10	-9.70269	2.51446			10	-6.468	2.21013		20	2.21813	0.0172845		30	-0.140158	-1.81268		40	4.33385	-2.45197		50	7.53669	-6.32705		60	3.67417	-2.5274			20-30	-0.771473	0.358138	7.24233	0.580632										9	192.514	117.658
20180308	5	6	10	1.52208	2.67663			10	-6.38204	2.37918		20	-4.59365	0.0729825		30	3.5021	-1.7265		40	3.04948	-1.7888		50	4.26064	-6.20571		60	-0.344171	-2.06975			30-40	1.13472	0.303194	4.74314	0.430488										10	209.968	122.097
20180308	8	7	10	-5.61519	2.86017			10	-2.24131	2.51263		20	-8.89297	0.390172		30	2.48537	-1.7057		40	0.948845	-1.75077		50	2.27545	-5.8875		60	13.9982	-2.05935			40-50	1.65803	0.283983	1.56795	0.399345										11	214.37	136.616
20180220 60	4	6	10	4.83178	2.98516			10	-9.70269	2.51446		20	-1.48471	0.409882		30	0.268963	-1.34165		40	5.1294	-1.6225		50	1.17356	-5.74115		60	2.91856	-1.80612			50-60	1.0704	0.283227	2.0486	0.445498										12	252.121	135.701
20180220 60	1	5	10	-10.943	2.99019			10	1.52208	2.67663		20	-1.28858	0.546033		30	3.22426	-1.18678		40	3.36982	-1.59237		50	3.54963	-5.23498		60	1.09726	-1.56064																	13	247.42	137.9
20180220 60	4	7	10	0.969188	3.1048			10	-5.61519	2.86017		20	4.22143	0.624038		30	6.53323	-0.6448		40	4.77655	-1.51849		50	0.799621	-5.18298		60	4.03871	-1.47592																	14	283.898	143.766
20180308	6	3	10	-11.1167	3.25143			10	4.83178	2.98516		20	1.12343	0.658667		30	-1.26043	-0.601616		40	-2.41229	-1.42485		50	-0.278736	-4.95763		60	3.15046	-1.4509																	15	263.813	142.309
20180220 30	5	7	10	-1.06223	3.27613			10	-10.943	2.99019		20	2.49568	0.775671		30	3.3682	-0.407091		40	-2.06249	-1.37952		50	1.2131	-4.21225		60	0.59222	-1.433																	16	304.829	159.888
20180220 60	3	3	10	-11.0554	3.64842			10	0.969188	3.1048		20	-2.11311	1.21841		30	0.287716	-0.350368		40	2.70888	-1.04006		50	7.11676	-4.19492		60	-0.746981	-1.38425																	17	290.363	158.402
20180220 60	1	7	10	3.87451	3.74117			10	-11.1167	3.25143		20	5.02103	1.29195		30	-0.333251	-0.282157		40	16.0196	-1.03505		50	7.87114	-4.08716		60	4.75615	-1.3469																	18	329.711	160.542
20180308	6	4	10	-1.91764	3.98895			10	-1.06223	3.27613		20	-8.98486	1.46744		30	-4.53097	-0.2808		40	0.682074	-0.970043		50	-3.2177	-4.07358		60	-0.235227	-1.3208																	19	327.19	162.333
20180220 60	6	13	10	5.74956	3.99193			10	-11.0554	3.64842		20	5.07445	1.86252		30	1.11541	-0.0520031		40	1.80646	-0.894454		50	1.76886	-3.95224		60	1.02015	-1.285																	20	351.97	166.286
20180220 30	5	3	10	-1.30524	4.16024			10	3.87451	3.74117		20	-3.80253	2.00012		30	4.45472	0.0180419		40	0.139392	-0.83702		50	2.97175	-3.89696		60	3.20203	-1.2845																	21	324.084	165.458
20180220 60	3	7	10	-10.4776	4.43271			10	-1.91764	3.98895		20	-2.52019	2.03543		30	2.86575	0.0240747		40	-0.526636	-0.780575		50	4.46566	-3.79026		60	1.13738	-1.25639																	22	364.024	171.683
20180308	9	14	10	1.436	4.5188			10	5.74956	3.99193		20	3.75956	2.0383		30	-0.177955	0.143226		40	0.23923	-0.624		50	3.03199	-3.75465		60	6.35577	-1.19923																	23	325.637	182.618
20180220 60	2	6	10	-4.5345	4.5691			10	-1.30524	4.16024		20	-11.3683	2.06083		30	3.60165	0.166354		40	-0.144314	-0.5252		50	2.09124	-3.6572		60	2.5842	-1.1544																	24	364.78	174.232
20180220 60	3	6	10	1.48635	4.61579			10	-10.4776	4.43271		20	3.96426	2.07286		30	-4.59477	0.197824		40	4.32364	-0.504409		50	1.4319	-3.57774		60	-2.03846	-1.1129																	25	352.794	172.403
20180308	10	14	10	-7.59557	4.66988			10	1.436	4.5188		20	5.57817	2.15473		30	-5.21511	0.4264		40	3.99805	-0.40565		50	-1.90975	-3.53621		60	0.574635	-1.02519																	26	377.072	174.867
20180220 30	7	6	10	9.09274	4.69254			10	-4.5345	4.5691		20	-5.92398	2.3394		30	4.95606	0.516667		40	-0.804083	-0.34538		50	2.49626	-3.5196		60	-0.242452	-0.921342																	27	386.149	201.665
20180220 60	3	11	10	6.9492	5.14272			10	1.48635	4.61579		20	8.57173	2.43009		30	-1.00002	0.86335		40	6.55683	-0.27735		50	3.84868	-3.41487		60	-2.19206	-0.888574																	28	408.994	194.14
20180220 60	5	1	10	-1.74133	5.20532			10	-7.59557	4.66988		20	-5.8049	2.47162		30	2.36042	1.0121		40	-0.210737	-0.199022		50	1.99732	-2.86371		60	5.54766	-0.771737																	29	363.144	148.892
20180220 60	4	8	10	6.14141	5.36937			10	9.09274	4.69254		20	-1.20791	2.62617		30	2.49045	1.02445		40	4.14801	-0.104006		50	2.56091	-2.79083		60	1.53406	-0.683815																	30	409.357	187.02
20180220 30	9	2	10	-12.1662	5.37361			10	6.9492	5.14272		20	3.6936	2.63655		30	-26.0989	1.24969		40	5.68707	5.68434e-15		50	0.509852	-2.77926		60	1.35099	-0.68125																	31	346.939	180.672
20180308	4	8	10	-2.95509	5.40092			10	-1.74133	5.20532		20	-1.5563	2.64214		30	0.155927	1.34322		40	1.89635	0.0208012		50	7.25869	-2.64176		60	1.45757	-0.67605																	32	433.64	190.121
20180308	6	7	10	-0.485717	5.44795			10	6.14141	5.36937		20	-0.850548	2.69215		30	-5.89189	1.36383		40	-0.211543	0.0294833		50	1.97612	-2.54217		60	-0.147591	-0.54085																	33	384.591	179.429
20180308	8	3	10	-3.01696	5.46223			10	-12.1662	5.37361		20	2.68222	2.71276		30	0.791301	1.3884		40	2.12444	0.0481684		50	12.5066	-2.5388		60	2.42974	-0.43165																	34	439.72	177.048
20180220 60	5	5	10	6.30648	5.46919			10	-2.95509	5.40092		20	-2.80495	2.80817		30	-2.44763	1.54445		40	2.20584	0.2653		50	-0.973866	-2.35088		60	0.785404	-0.0052																	35	384.034	189.974
20180220 30	5	6	10	-11.7473	5.53347			10	-0.485717	5.44795		20	-1.88453	3.06818		30	0.869239	1.54724		40	1.84155	0.632244		50	-1.67654	-2.32297		60	3.71855	0.0973343																	36	446.154	206.3
20180220 30	4	7	10	-6.69694	5.60124			10	-3.01696	5.46223		20	-1.70668	3.56114		30	-0.772084	1.56009		40	16.1907	0.6485		50	2.81622	-2.26214		60	4.5214	0.1507																	37	419.603	196.071
20180220 60	6	7	10	-1.31964	5.66057			10	6.30648	5.46919		20	4.80366	3.63654		30	-0.899107	1.76183		40	2.10845	0.682237		50	1.457	-2.2465		60	1.42674	0.1508																	38	444.317	222.486
20180220 30	4	6	10	-7.34656	5.79075			10	-11.7473	5.53347		20	0.985336	3.90023		30	-1.91611	1.83744		40	3.62163	0.702042		50	4.8226	-1.9204		60	0.0088672	0.201603																	39	438.563	157.85
20180308	6	9	10	-20.804	5.81915			10	-6.69694	5.60124		20	-4.241	3.93523		30	-1.93292	1.92977		40	3.10448	0.746718		50	-0.707954	-1.89758		60	1.12173	0.22802																	40	457.526	219.196
20180220 30	5	4	10	-9.22462	5.98287			10	-1.31964	5.66057		20	1.30977	3.93687		30	-0.670562	2.14253		40	-0.552653	0.74951		50	3.31021	-1.8254		60	2.90655	0.39005																	41	425.927	179.779
20180220 30	3	6	10	-7.84836	6.1033			10	-7.34656	5.79075		20	-1.38913	4.05198		30	-1.29682	2.1478		40	-2.64371	0.861766		50	-1.05086	-1.80436		60	2.39701	0.6188																	42	459.531	222.836
20180220 60	5	10	10	3.29248	6.11475			10	-20.804	5.81915		20	-5.26974	4.13396		30	-8.69706	2.17642		40	-3.72805	0.894454		50	1.24943	-1.74558		60	1.82781	1.00365																	43	421.671	205.008
20180308	5	8	10	-0.845233	6.31838			10	-9.22462	5.98287		20	-1.76929	4.14823		30	-1.67201	2.19455		40	3.3955	0.924306		50	2.98134	-1.73175		60	-0.345795	1.01405																	44	459.649	204.681
20180220 60	6	22	10	5.99575	6.63269			10	-7.84836	6.1033		20	-2.60015	4.18764		30	-1.13708	2.26735		40	-1.08065	0.97235		50	0.480038	-1.67208		60	2.48899	1.02269																	45	445.757	170.378
20180220 60	3	10	10	4.00544	6.64437			10	3.29248	6.11475		20	16.9014	4.22077		30	2.90474	2.37094		40	1.55812	0.988539		50	-1.2712	-1.56009		60	1.83337	1.03097																	46	458.806	228.35
20180220 30	6	2	10	0.332133	6.8193			10	-0.845233	6.31838		20	1.44288	4.29829		30	-2.08872	2.5169		40	0.309305	1.13365		50	1.75699	-1.45609		60	-1.13888	1.18045																	47	463.132	175.983
20180220 30	4	8	10	-2.23388	6.82156			10	5.99575	6.63269		20	-0.16906	4.43067		30	-1.31002	2.54568		40	1.32097	1.13389		50	1.16964	-1.45182		60	-0.490742	1.21685																	48	500.305	240.431
20180308	10	9	10	-0.378524	7.01907			10	4.00544	6.64437		20	-0.247588	4.43567		30	-0.096355	2.67383		40	16.9368	1.26253		50	2.46346	-1.4353		60	-0.540456	1.23006																	49	437.176	208.953
20180308	11	6	10	-2.19475	7.04626			10	0.332133	6.8193		20	-8.62771	4.55547		30	-1.57019	2.68		40	2.17255	1.28968		50	-0.932674	-1.40408		60	1.63331	1.32085																	50	433.161	191.205
20180308	5	12	10	-2.41222	7.16185			10	-2.23388	6.82156		20	-3.82169	4.5556		30	-2.5817	2.80817		40	-1.19345	1.3833		50	3.1942	-1.35606		60	2.73382	1.32608																	51	479.115	235.133
20180220 30	9	3	10	-3.50544	7.17832			10	-0.378524	7.01907		20	-0.817695	4.79915		30	2.67735	2.93056		40	1.40193	1.40408		50	-0.261619	-1.31045		60	-1.95581	1.3781																	52	506.089	251.795
20180308	8	2	10	-8.98603	7.36884			10	-2.19475	7.04626		20	-4.67436	4.81549		30	-2.72769	2.99538		40	-1.38528	1.47622		50	5.72474	-1.23076		60	1.1995	1.3936																	53	483.447	224.673
20180220 30	6	16	10	12.1897	7.374			10	-2.41222	7.16185		20	-11.2906	4.87789		30	5.45849	3.09063		40	-0.151116	1.58062		50	11.2002	-1.23074		60	0.847626	1.42363																	54	532.765	249.696
20180220 30	5	2	10	-9.73111	7.51693			10	-3.50544	7.17832		20	-0.285752	5.34508		30	-2.10496	3.13055		40	1.57702	1.59704		50	2.42586	-1.17874		60	1.23483	1.6017																	55	495.174	241.42
20180308	9	1	10	3.66811	7.69126			10	-8.98603	7.36884		20	-8.71831	5.40753		30	3.58887	3.17219		40	2.24592	1.63169		50	1.54611	-1.08184		60	2.95913	1.62255																	56	533.485	268.726
20180220 30	7	2	10	-6.6191	7.79674			10	12.1897	7.374		20	-3.07801	5.53374		30	1.17703	3.32825		40	0.937485	1.64207		50	3.36944	-1.00539		60	-0.657479	1.65375																	57	508.928	289.837
20180308	7	5	10	-2.62484	7.8022			10	-9.73111	7.51693		20	1.80985	5.64703		30	3.3248	3.35842		40	-0.316236	1.68745		50	0.104561	-0.9464		60	-2.21042	1.74008																	58	551.151	267.102
20180220 60	6	21	10	-6.12026	7.86817			10	3.66811	7.69126		20	8.65267	5.98036		30	-0.443206	3.47711		40	0.0991032	1.71033		50	1.94588	-0.936056		60	-2.48468	1.9813																	59	520.517	195.268
20180308	7	7	10	5.92505	7.99108			10	-6.6191	7.79674		20	-4.46614	6.07917		30	-3.7574	3.56368		40	0.103297	1.73212		50	2.594	-0.924821		60	0.412688	1.98246																	60	550.205	277.935
20180220 60	3	4	10	14.4655	7.99635			10	-2.62484	7.8022		20	18.0785	6.07999		30	0.47427	3.67203		40	3.18234	1.76861		50	9.97052	-0.860404		60	-3.62149	2.11229
20180308	5	10	10	1.53843	8.02582			10	-6.12026	7.86817		20	1.64908	6.35499		30	-1.5433	3.68146		40	4.13134	1.80277		50	1.00238	-0.565624		60	-0.0216835	2.11376
20180308	9	2	10	-0.0887645	8.11249			10	5.92505	7.99108		20	-7.81065	6.36		30	0.391415	3.74425		40	1.32533	1.80971		50	3.36971	-0.559643		60	-1.59499	2.1322
20180308	7	11	10	7.39722	8.17489			10	14.4655	7.99635		20	-10.3731	6.54673		30	-0.714299	4.02437		40	-0.276736	1.86749		50	-0.558801	-0.520031		60	-1.27138	2.18581
20180308	7	6	10	11.1423	8.19022			10	1.53843	8.02582		20	-8.29416	6.55611		30	0.699745	4.0719		40	0.0205486	1.90607		50	-2.83902	-0.354117		60	2.7717	2.2167
20180220 30	6	8	10	3.64853	8.24252			10	-0.0887645	8.11249		20	-5.32258	6.73961		30	-3.56925	4.07482		40	-1.38877	1.92405		50	6.76513	-0.2653		60	-0.449568	2.45368
20180220 30	3	1	10	-9.55262	8.30579			10	7.39722	8.17489		20	-4.1518	6.80979		30	4.36817	4.17243		40	-0.0394614	1.97605		50	3.28695	-0.16645		60	-2.44239	2.45905
20180220 30	4	4	10	-4.22402	8.33999			10	11.1423	8.19022		20	-6.53997	6.86439		30	-2.32621	4.29079		40	0.649894	2.06987		50	3.98386	-0.12485		60	1.0552	2.65544
20180220 30	7	3	10	-6.82667	8.39807			10	3.64853	8.24252		20	-5.1078	6.91877		30	-0.175117	4.34491		40	-3.87424	2.09575		50	4.32075	-0.0281541		60	-0.213731	2.70636
20180220 60	6	20	10	3.43876	8.58966			10	-9.55262	8.30579		20	-4.66865	7.05009		30	-0.220688	4.38665		40	5.29246	2.16333		50	-2.23249	0.0398052		60	4.13933	2.7145
20180220 30	9	4	10	-1.94343	8.93453			10	-4.22402	8.33999		20	-0.919746	7.10671		30	5.34859	4.47155		40	-0.84623	2.2247		50	13.7669	0.172849		60	-1.83587	2.74055
20180308	10	2	10	-6.78314	9.27764			10	-6.82667	8.39807		20	-7.57634	7.39633		30	-3.05444	4.52922		40	-1.93778	2.2489		50	-7.47653	0.26525		60	-2.25491	2.81432
20180308	11	4	10	-6.752	9.53217			10	3.43876	8.58966		20	-1.91207	7.48845		30	-5.42073	4.53595		40	4.75004	2.39214		50	-0.145136	0.398691		60	3.71103	2.8705
20180220 60	2	1	10	5.84641	9.58867			10	-1.94343	8.93453		20	-5.2936	7.57173		30	0.848084	4.55027		40	-4.97302	2.42482		50	0.0143661	0.45755		60	-0.924334	3.03353
20180220 60	4	9	10	8.8205	9.6795			10	-6.78314	9.27764		20	-0.934626	7.64357		30	-5.82409	4.55547		40	-0.835621	2.51695		50	-2.18591	0.477389		60	-4.42606	3.26065
20180308	11	1	10	-2.91061	9.68298			10	-6.752	9.53217		20	-8.07474	7.75508		30	-0.38101	4.59185		40	1.22358	2.54951		50	2.00988	0.508258		60	1.33145	3.328
20180308	11	11	10	-5.47251	9.68312			10	5.84641	9.58867		20	-9.39545	7.85681		30	-2.12944	4.74679		40	2.358	2.60016		50	1.52543	0.52		60	1.47662	3.3438
20180308	9	3	10	-4.11174	9.9222			10	8.8205	9.6795		20	-7.33036	7.94095		30	-4.7788	4.75305		40	6.04856	2.61749		50	-0.941649	0.680346		60	2.26278	3.505
20180308	7	13	10	-3.22746	9.94891			10	-2.91061	9.68298		20	-1.5302	8.00848		30	2.13463	4.78429		40	2.70706	2.83788		50	1.17674	0.7384		60	-1.13264	3.95982
20180308	5	7	10	-6.97773	10.3232			10	-5.47251	9.68312		20	-9.02312	8.2238		30	2.70328	4.87344		40	7.09698	2.84496		50	1.30583	0.77485		60	0.495022	4.1031
20180220 60	6	1	10	17.2752	10.3947			10	-4.11174	9.9222		20	9.82572	8.23008		30	6.32701	5.05836		40	2.95486	2.8802		50	5.64042	0.797381		60	1.48786	4.12385
20180308	10	13	10	-5.87783	10.6152			10	-3.22746	9.94891		20	0.896212	8.2945		30	2.53325	5.0956		40	-2.1582	2.95565		50	-2.18718	0.849384		60	-1.90287	4.34092
20180308	8	9	10	-14.1375	10.6762			10	-6.97773	10.3232		20	-8.35451	8.39408		30	-3.49801	5.12676		40	-2.13785	2.96418		50	0.825878	0.884053		60	0.373	4.82075
20180308	9	11	10	-4.65523	11.2275			10	17.2752	10.3947		20	-6.26115	8.46165		30	-1.32254	5.22481		40	-0.388463	2.98645		50	2.83303	0.88925		60	-0.46433	5.08075
20180220 30	6	1	10	-1.5513	11.2523			10	-5.87783	10.6152		20	2.38278	8.49645		30	5.71344	5.25762		40	-2.75452	2.99602		50	1.69885	0.9153		60	1.01857	5.14213
20180308	8	5	10	-1.70866	11.2587			10	-14.1375	10.6762		20	4.37548	8.63453		30	2.47687	5.30432		40	3.43183	3.09939		50	10.3741	0.995488		60	1.71435	5.3147
20180308	4	5	10	-5.29015	11.5228			10	-4.65523	11.2275		20	-5.68356	8.84053		30	-4.04042	5.32165		40	1.63011	3.10023		50	0.790237	0.995674		60	0.940523	5.68105
20180220 60	3	2	10	-1.64828	11.5262			10	-1.5513	11.2523		20	-1.91706	9.13087		30	-1.32794	5.33873		40	1.47838	3.16059		50	-0.322012	0.9985		60	-2.21396	5.8452
20180308	5	9	10	-15.4962	11.5932			10	-1.70866	11.2587		20	-3.32307	9.28938		30	-0.00575497	5.59034		40	-4.6236	3.1878		50	1.02864	1.02792		60	0.0966505	5.86595
20180220 30	6	13	10	-16.1283	11.822			10	-5.29015	11.5228		20	-5.60095	9.36098		30	-4.51787	5.59555		40	-2.85166	3.19909		50	0.785063	1.04005		60	1.35223	5.94838
20180220 30	6	3	10	-1.35921	11.8286			10	-1.64828	11.5262		20	-4.72337	9.38646		30	-4.13225	5.61378		40	-0.855254	3.27285		50	3.13254	1.15944		60	-5.30704	6.204
20180220 60	6	18	10	-0.980872	11.8421			10	-15.4962	11.5932		20	3.342	9.58814		30	-5.94394	5.76195		40	14.7548	3.27925		50	-1.66799	1.1804		60	0.321093	6.27675
20180308	5	2	10	-1.32989	11.9607			10	-16.1283	11.822		20	-9.83299	9.7298		30	3.13798	5.76195		40	0.8343	3.28363		50	-3.30184	1.20102		60	-0.913147	6.3964
20180220 60	5	2	10	8.33175	12.0024			10	-1.35921	11.8286		20	-4.01435	9.73006		30	-5.08813	5.76986		40	-1.75264	3.3542		50	0.5185	1.21687		60	-2.97873	7.0517
20180308	4	12	10	-18.2536	12.1063			10	-0.980872	11.8421		20	-4.69737	10.012		30	-5.87513	6.01155		40	0.661703	3.6975		50	0.686401	1.2377		60	-2.47924	7.21795
20180220 30	4	1	10	-10.2026	12.2547			10	-1.32989	11.9607		20	4.53749	10.2186		30	-3.79484	6.11598		40	2.57075	3.99895		50	-1.61745	1.26278		60	-0.13093	7.5718
20180308	6	6	10	-17.2114	12.2571			10	8.33175	12.0024		20	-3.26367	10.333		30	-2.77708	6.31374		40	-1.41705	4.0147		50	0.984078	1.3156		60	-1.73639	7.9825
20180308	6	12	10	-4.20079	12.7549			10	-18.2536	12.1063		20	-3.75034	10.5074		30	1.14485	6.34438		40	0.662772	4.1291		50	-0.810976	1.41709		60	-2.47687	8.32055
20180220 60	4	4	10	-18.8281	12.8879			10	-10.2026	12.2547		20	-9.37799	10.5567		30	3.11397	6.40675		40	-0.0652976	4.25385		50	1.6456	1.43875		60	2.43146	9.2774
20180220 60	5	3	10	-0.690116	13.0281			10	-17.2114	12.2571		20	-0.388513	10.5663		30	0.834143	6.52441		40	0.708446	4.3266		50	1.14536	1.47165		60	6.16586	9.43335
20180308	10	10	10	-8.17117	13.132			10	-4.20079	12.7549		20	-4.89584	10.5826		30	-2.38461	6.59242		40	1.45721	4.39013		50	1.07475	1.5133		60	4.53576	10.5184
20180220 30	3	7	10	-4.30491	13.2407			10	-18.8281	12.8879		20	2.22763	10.6433		30	-6.30086	6.6563		40	-1.97763	4.41976		50	-1.15677	1.59769		60	5.17268	11.5469
20180308	7	12	10	-0.144676	13.2551			10	-0.690116	13.0281		20	-3.05478	10.6606		30	1.70342	6.83325		40	-1.85406	4.54231		50	-4.34811	1.6901		60	4.18631	11.817
20180308	4	4	10	-0.297695	13.3492			10	-8.17117	13.132		20	-7.75386	10.9078		30	-8.81309	6.85915		40	-2.27675	4.70105		50	2.10126	1.73095		60	-3.62123	12.9824
20180220 30	6	5	10	-11.7287	13.3683			10	-4.30491	13.2407		20	-7.76893	10.9107		30	-1.35727	6.88525		40	-0.306766	4.71415		50	-0.758868	1.78375		60	5.39506	13.9094
20180220 30	4	9	10	-7.33127	13.4614			10	-0.144676	13.2551		20	-6.1778	11.0663		30	-3.82425	6.93725		40	0.507217	4.909		50	1.16774	1.85655		60	-2.7154	15.2633
20180220 60	5	7	10	-16.33	13.9822			10	-0.297695	13.3492		20	-3.87461	11.1002		30	-1.74286	7.04643		40	-1.13869	4.95398		50	11.933	1.89985		60	14.4104	19.08
20180308	11	7	10	-12.7876	14.4863			10	-11.7287	13.3683		20	-3.31211	11.1087		30	0.113358	7.28045		40	2.27276	4.9663		50	5.60521	1.96045
20180308	4	2	10	-14.281	14.6129			10	-7.33127	13.4614		20	16.5827	11.1271		30	-10.8549	7.48064		40	1.94511	5.0183		50	0.634429	2.06443
20180308	8	6	10	-6.92118	15.0965			10	-16.33	13.9822		20	-6.57994	11.5257		30	5.6734	7.71726		40	-0.562868	5.04435		50	1.69528	2.11479
20180308	8	4	10	-3.63498	15.1854			10	-12.7876	14.4863		20	-1.94498	11.6777		30	-6.33646	7.73492		40	0.78208	5.09631		50	-4.20252	2.14513
20180220 60	6	14	10	-0.845213	15.4487			10	-14.281	14.6129		20	-4.49741	12.0914		30	-4.7191	7.96953		40	-3.51271	5.22115		50	3.24197	2.18413
20180308	11	9	10	-8.04002	15.5069			10	-6.92118	15.0965		20	-9.66258	12.4235		30	-7.40709	7.99548		40	-0.506491	5.2471		50	5.14198	2.21342
20180220 60	6	11	10	-7.19297	15.8669			10	-3.63498	15.1854		20	-7.46352	12.5067		30	3.53199	8.11249		40	0.532783	5.33169		50	1.93767	2.23699
20180308	10	1	10	-15.1012	16.0274			10	-0.845213	15.4487		20	-0.534987	12.6021		30	-4.24374	8.24172		40	0.530243	5.40182		50	0.426921	2.24371
20180308	9	13	10	4.8401	16.0908			10	-8.04002	15.5069		20	1.62807	12.8916		30	-1.82322	8.24397		40	6.42556	5.44993		50	2.50978	2.25345
20180308	4	7	10	5.89418	16.173			10	-7.19297	15.8669		20	-5.92418	13.0065		30	0.417252	8.24723		40	4.04052	5.56433		50	2.50097	2.27526
20180220 30	6	11	10	7.20844	16.3602			10	-15.1012	16.0274		20	-13.3923	13.1492		30	-3.41877	8.27684		40	4.58775	5.57473		50	-4.34701	2.3973
20180308	6	1	10	-3.87735	16.6089			10	4.8401	16.0908		20	-19.4689	13.1776		30	-4.83233	8.47038		40	0.903597	5.81268		50	0.478164	2.413
20180308	10	4	10	-9.44295	16.7406			10	5.89418	16.173		20	-11.4025	13.6304		30	-2.83947	8.6481		40	12.2511	5.98035		50	0.426989	2.43895
20180220 30	3	4	10	0.0307241	16.8625			10	7.20844	16.3602		20	-7.08442	13.7649		30	0.628055	8.6585		40	7.06158	6.07396		50	7.79017	2.44415
20180308	7	14	10	-8.60965	17.4494			10	-3.87735	16.6089		20	-5.47392	13.8867		30	0.933401	8.76902		40	-0.743594	6.12199		50	-4.26205	2.5014
20180308	6	11	10	-0.673778	18.0199			10	-9.44295	16.7406		20	2.80134	14.1003		30	0.576768	8.77553		40	0.520054	6.14633		50	8.43874	2.53082
20180220 60	3	12	10	-0.102687	18.7082			10	0.0307241	16.8625		20	0.636071	14.2073		30	-8.03132	8.8301		40	-2.79031	6.22674		50	-4.58261	2.7142
20180308	11	3	10	0.226163	18.9102			10	-8.60965	17.4494		20	-6.07054	14.2673		30	8.40824	8.88585		40	-3.42958	6.35395		50	2.16105	2.89484
20180308	10	15	10	-11.5193	19.5193			10	-0.673778	18.0199		20	-3.0046	14.2901		30	1.1325	8.90554		40	1.07661	6.76947		50	0.0767638	2.93497
20180220 60	3	9	10	-53.9604	19.7996			10	-0.102687	18.7082		20	-6.25964	14.3754		30	3.44326	8.90987		40	1.34172	6.81744		50	0.380095	2.959
20180308	6	2	10	-7.13101	19.8034			10	0.226163	18.9102		20	-5.42702	14.4758		30	8.90936	8.91854		40	-1.38348	6.84007		50	-1.93559	3.16637
20180220 30	9	1	10	-9.58537	20.0634			10	-11.5193	19.5193		20	-5.66358	14.5374		30	-4.33133	9.13035		40	3.41185	6.84361		50	1.04728	3.17219
20180220 30	6	10	10	-11.2192	20.229			10	-53.9604	19.7996		20	-9.84982	14.6129		30	3.31563	9.13175		40	-2.88053	6.96842		50	0.860113	3.2658
20180308	5	4	10	-9.38784	20.4346			10	-7.13101	19.8034		20	-4.78896	14.6181		30	2.77989	9.25694		40	4.54752	7.34805		50	1.72257	3.27053
20180308	11	5	10	-1.82028	21.2808			10	-9.58537	20.0634		20	-11.2988	14.9145		30	5.30806	9.3449		40	-0.112314	7.38435		50	0.229421	3.27105
20180220 30	3	5	10	1.13338	21.4254			10	-11.2192	20.229		20	-10.0669	15.0316		30	3.3214	9.36056		40	-6.70509	7.38444		50	-0.392936	3.35988
20180308	6	5	10	-5.45645	21.694			10	-9.38784	20.4346		20	-1.4895	15.4499		30	5.96793	9.79875		40	-1.98149	7.40524		50	-1.22692	3.45396
20180220 60	6	19	10	-28.9239	21.7379			10	-1.82028	21.2808		20	-1.9831	15.7186		30	-0.578972	9.94348		40	1.0174	7.47795		50	2.00824	3.4738
20180308	4	3	10	-2.35541	22.4966			10	1.13338	21.4254		20	-5.38249	15.766		30	-3.71293	10.0144		40	4.68832	7.53005		50	1.35371	3.5622
20180220 60	4	13	10	-16.6022	22.5152			10	-5.45645	21.694		20	-6.23294	16.3368		30	2.55847	10.0826		40	-6.69977	7.6445		50	2.16738	3.75125
20180308	10	6	10	-13.9187	22.6006			10	-28.9239	21.7379		20	-5.6005	16.6912		30	3.40584	10.2308		40	-2.7678	8.00566		50	2.4547	3.80135
20180220 60	6	17	10	14.1385	22.7947			10	-2.35541	22.4966		20	-3.93922	16.828		30	-1.72751	10.5805		40	6.00693	8.11249		50	1.88462	3.86903
20180220 60	4	5	10	-3.65028	23.1713			10	-16.6022	22.5152		20	2.13004	17.1695		30	-1.06785	10.7963		40	2.80369	8.2322		50	-1.01653	3.97749
20180220 60	4	11	10	-12.3784	23.1912			10	-13.9187	22.6006		20	-7.04284	17.9675		30	1.69584	11.1287		40	-11.6825	8.2685		50	-1.15476	4.1134
20180220 60	4	10	10	-2.79047	23.713			10	14.1385	22.7947		20	3.9611	18.2945		30	1.72117	11.1626		40	0.632806	8.38815		50	0.522397	4.12063
20180308	4	9	10	-16.6109	23.8114			10	-3.65028	23.1713		20	-9.85272	18.4567		30	-3.97462	11.6347		40	7.61469	8.40929		50	1.94196	4.13425
20180308	8	8	10	-5.96082	23.8296			10	-12.3784	23.1912		20	-0.167021	18.5911		30	-3.24962	11.6537		40	0.170632	8.49384		50	-4.09637	4.22577
20180308	11	8	10	-15.4584	23.9526			10	-2.79047	23.713		20	-4.32581	18.7887		30	-5.98041	11.7007		40	-0.520133	8.50376		50	-6.39174	4.3319
20180308	10	7	10	-10.6652	24.0341			10	-16.6109	23.8114		20	4.95713	18.8843		30	2.54446	11.9954		40	0.204323	8.52335		50	4.45889	4.43983
20180308	5	5	10	-14.8873	24.7163			10	-5.96082	23.8296		20	-2.09849	18.9396		30	4.58837	12.1074		40	-3.4529	8.54585		50	-1.98385	4.73369
20180220 60	5	11	10	-7.06308	24.7307			10	-15.4584	23.9526		20	-9.38525	18.9707		30	-7.73549	12.1509		40	5.35111	8.57515		50	2.56051	5.07555
20180220 60	6	12	10	-0.596706	24.8998			10	-10.6652	24.0341		20	-11.7433	18.9991		30	-12.8563	12.3143		40	-0.37692	8.58052		50	-6.1463	5.22635
20180220 30	3	9	10	-4.31304	25.382			10	-14.8873	24.7163		20	-14.6776	19.2932		30	-2.84025	13.2558		40	8.00246	8.58052		50	4.76608	5.4187
20180220 60	6	16	10	-3.58462	25.4534			10	-7.06308	24.7307		20	-4.50577	19.4698		30	-0.888562	13.5		40	-4.50898	8.71572		50	0.0574958	5.44993
20180220 60	5	12	10	3.98027	25.5542			10	-0.596706	24.8998		20	-3.69488	19.6202		30	9.61777	13.6248		40	-0.328583	8.9393		50	1.99863	5.49383
20180308	6	10	10	-16.171	25.9138			10	-4.31304	25.382		20	-5.24758	19.7208		30	-0.499616	13.7227		40	2.39488	9.67258		50	2.12368	5.5903
20180308	10	11	10	-24.9213	26.3136			10	-3.58462	25.4534		20	0.275483	20.3553		30	7.48931	13.7303		40	5.20409	9.71415		50	6.99035	5.72035
20180308	6	8	10	-1.00609	26.9039			10	3.98027	25.5542		20	-6.90312	20.4736		30	-5.60542	13.7505		40	8.53909	9.74677		50	1.71061	5.75126
20180220 30	5	10	10	-15.0018	27.1352			10	-16.171	25.9138		20	-5.44752	20.6279		30	-2.50764	13.7627		40	2.47751	9.76173		50	0.813376	5.79835
20180308	5	11	10	-9.42108	27.3814			10	-24.9213	26.3136		20	-5.8316	20.9399		30	-6.02743	13.9966		40	4.74593	9.77128		50	-2.11589	5.91721
20180308	7	15	10	-7.11891	27.5669			10	-1.00609	26.9039		20	-10.1351	21.3699		30	-2.72637	14.0998		40	-2.52149	10.3798		50	-1.05556	5.9856
20180220 60	5	8	10	-10.8102	27.7426			10	-15.0018	27.1352		20	-5.36225	21.4246		30	1.28962	14.2814		40	-1.19884	10.506		50	2.43312	6.11903
20180220 60	5	13	10	-3.51262	27.774			10	-9.42108	27.3814		20	-1.3925	21.7789		30	-1.82615	14.4569		40	-5.68551	10.5513		50	4.01611	6.15547
20180220 60	4	1	10	-10.8869	27.9309			10	-7.11891	27.5669		20	-5.73333	21.8408		30	4.1629	14.9406		40	0.144265	10.9987		50	0.00461085	6.32358
20180308	11	2	10	-16.0851	28.1753			10	-10.8102	27.7426		20	-7.4065	21.8519		30	2.97407	15.0872		40	-4.81959	11.2899		50	0.105746	6.4432
20180220 60	6	9	10	-15.2235	28.6944			10	-3.51262	27.774		20	-2.97735	21.9444		30	-2.47945	15.4034		40	1.40501	11.5744		50	4.88514	6.47591
20180308	5	13	10	-11.5565	28.8201			10	-10.8869	27.9309		20	1.55628	22.3093		30	1.3483	15.9546		40	2.05623	11.7892		50	11.4135	6.66407
20180220 60	3	8	10	-10.1766	29.6802			10	-16.0851	28.1753		20	-7.82802	22.3264		30	-4.93069	16.6826		40	1.41672	11.9607		50	0.0154598	6.68245
20180220 30	6	15	10	-12.8635	29.7235			10	-15.2235	28.6944		20	4.87715	22.448		30	-6.34001	17.1032		40	4.20793	12.096		50	-0.523325	6.76041
20180220 30	7	5	10	-8.77177	29.9587			10	-11.5565	28.8201		20	-1.17595	22.4939		30	-4.68672	17.5979		40	-3.06618	13.6664		50	1.35315	6.85141
20180220 30	6	12	10	-7.24667	30.0754			10	-10.1766	29.6802		20	-6.57535	22.7287		30	12.3506	18.3589		40	-0.869492	14.164		50	-1.73086	6.87485
20180308	11	13	10	-11.3228	30.1375			10	-12.8635	29.7235		20	-1.7877	23.1934		30	2.70717	18.5201		40	7.14632	14.7108		50	-0.144347	7.13243
20180220 60	6	5	10	-7.55368	30.461			10	-8.77177	29.9587		20	-5.84476	24.1003		30	0.455011	19.1111		40	-5.60163	14.9716		50	2.58301	7.32253
20180220 60	6	10	10	-3.06923	30.8944			10	-7.24667	30.0754		20	-6.50745	24.1517		30	-0.0647242	20.3644		40	-6.82658	15.1064		50	8.88171	7.46245
20180220 60	4	2	10	-14.4684	30.9908			10	-11.3228	30.1375		20	-4.75751	26.1621		30	-5.04592	22.8274		40	-0.903778	15.4345		50	7.6997	8.07088
20180308	10	12	10	-12.2912	31.6629			10	-7.55368	30.461		20	-12.8786	26.4932		30	-5.59596	22.8484		40	0.811643	16.199		50	-2.22367	8.09014
20180220 60	5	4	10	-2.47198	31.9115			10	-3.06923	30.8944		20	1.93065	26.7232		30	-1.38062	22.9854		40	3.54933	17.0258		50	-1.28774	8.18005
20180220 60	6	8	10	-4.23905	32.3767			10	-14.4684	30.9908		20	-9.79499	26.8077		30	-7.431	23.183		40	-9.39005	17.6032		50	-24.2029	8.33085
20180220 30	7	1	10	-15.5541	33.5763			10	-12.2912	31.6629		20	-7.09346	27.1336		30	2.34413	24.2161		40	0.520949	17.7954		50	-1.69099	8.42451
20180220 30	6	4	10	-4.40837	34.5948			10	-2.47198	31.9115		20	-5.90379	27.3172		30	-15.1734	24.2174		40	0.662306	19.6364		50	2.98492	8.66223
20180220 30	6	14	10	-11.8186	34.6097			10	-4.23905	32.3767		20	-5.65109	27.3276		30	4.70482	26.1204		40	4.42116	19.9121		50	1.16452	9.10061
20180220 60	5	9	10	-23.7583	34.9813			10	-15.5541	33.5763		20	-8.65244	27.3962		30	-16.7423	28.881		40	2.93205	20.0296		50	0.920801	9.75579
20180220 60	6	6	10	-28.0687	35.2052			10	-4.40837	34.5948		20	9.09165	27.468		30	-17.2474	32.11		40	-4.76703	22.9498		50	-1.22069	10.1978
20180308	9	7	10	-11.9551	35.2421			10	-11.8186	34.6097		20	-17.6441	28.17		30	-4.96002	32.2835		40	10.3067	23.9422		50	8.69635	10.3142
20180220 60	6	4	10	-3.21714	36.3731			10	-23.7583	34.9813		20	-5.16411	29.2469		30	3.3846	33.5247		40	1.72879	32.1171		50	0.330997	10.3338
20180308	8	1	10	-20.9697	37.1914			10	-28.0687	35.2052		20	3.35349	30.1212		30	4.65883	44.688						50	3.52157	10.6501
20180308	11	12	10	-4.41184	38.7458			10	-11.9551	35.2421		20	-19.2723	30.6142										50	0.0846986	11.3001
20180220 30	7	4	10	-14.3195	40.9809			10	-3.21714	36.3731		20	-15.3599	31.7964										50	-1.63563	11.8371
20180308	7	1	10	-23.426	43.3785			10	-20.9697	37.1914		20	-4.73852	32.4117										50	0.388871	12.2717
20180308	9	9	10	6.68182	47.3852			10	-4.41184	38.7458		20	-6.75883	34.0059										50	-1.56137	12.3421
20180308	4	6	10	-22.444	48.8328			10	-14.3195	40.9809		20	-7.85922	34.7709										50	0.368209	12.6888
20180220 60	3	1	10	-33.0431	49.0941			10	-23.426	43.3785		20	3.57676	36.6214										50	1.47248	14.1582
20180220 60	6	2	10	-19.5172	58.0711			10	6.68182	47.3852		20	-8.85217	37.5437										50	3.94857	14.4846
20180308	7	14	20	-1.99759	-3.95224			10	-22.444	48.8328		20	-11.2087	40.63										50	5.78391	15.4722
20180220 60	6	20	20	-14.4772	-2.83468			10	-33.0431	49.0941		20	7.92756	41.8521										50	0.213774	16.1804
20180220 60	3	9	20	-6.9947	-0.7801			10	-19.5172	58.0711														50	-0.607307	23.8044
20180220 60	1	9	20	4.17411	-0.73109
20180220 30	4	8	20	-0.0623043	-0.653857
20180220 60	5	7	20	-16.2379	-0.5824
20180220 30	6	15	20	-2.08396	-0.474318
20180220 30	5	9	20	-6.77358	-0.314988
20180220 30	4	5	20	0.385717	-0.0957212
20180220 60	4	13	20	6.72465	-0.00131397
20180220 30	5	1	20	2.21813	0.0172845
20180220 30	5	5	20	-4.59365	0.0729825
20180220 60	3	6	20	-8.89297	0.390172
20180220 30	6	9	20	-1.48471	0.409882
20180308	5	12	20	-1.28858	0.546033
20180308	6	8	20	4.22143	0.624038
20180220 30	3	8	20	1.12343	0.658667
20180220 60	2	9	20	2.49568	0.775671
20180220 60	5	5	20	-2.11311	1.21841
20180220 30	5	7	20	5.02103	1.29195
20180220 60	4	6	20	-8.98486	1.46744
20180220 30	7	6	20	5.07445	1.86252
20180308	9	1	20	-3.80253	2.00012
20180220 30	5	3	20	-2.52019	2.03543
20180220 30	6	6	20	3.75956	2.0383
20180220 60	4	7	20	-11.3683	2.06083
20180220 60	3	12	20	3.96426	2.07286
20180220 30	6	8	20	5.57817	2.15473
20180220 60	6	21	20	-5.92398	2.3394
20180220 30	4	3	20	8.57173	2.43009
20180220 60	3	3	20	-5.8049	2.47162
20180220 30	9	4	20	-1.20791	2.62617
20180220 60	4	11	20	3.6936	2.63655
20180220 60	1	7	20	-1.5563	2.64214
20180220 60	3	8	20	-0.850548	2.69215
20180220 30	6	1	20	2.68222	2.71276
20180308	4	7	20	-2.80495	2.80817
20180308	6	10	20	-1.88453	3.06818
20180220 60	3	7	20	-1.70668	3.56114
20180220 30	5	6	20	4.80366	3.63654
20180308	7	2	20	0.985336	3.90023
20180220 30	9	3	20	-4.241	3.93523
20180220 60	4	2	20	1.30977	3.93687
20180308	4	9	20	-1.38913	4.05198
20180220 30	9	1	20	-5.26974	4.13396
20180220 30	5	10	20	-1.76929	4.14823
20180220 60	3	11	20	-2.60015	4.18764
20180220 60	1	6	20	16.9014	4.22077
20180308	11	11	20	1.44288	4.29829
20180308	11	7	20	-0.16906	4.43067
20180220 30	6	16	20	-0.247588	4.43567
20180308	4	2	20	-8.62771	4.55547
20180220 30	3	9	20	-3.82169	4.5556
20180308	4	3	20	-0.817695	4.79915
20180308	6	12	20	-4.67436	4.81549
20180308	10	6	20	-11.2906	4.87789
20180308	5	10	20	-0.285752	5.34508
20180220 30	6	5	20	-8.71831	5.40753
20180220 30	7	2	20	-3.07801	5.53374
20180308	9	14	20	1.80985	5.64703
20180308	7	6	20	8.65267	5.98036
20180308	10	14	20	-4.46614	6.07917
20180220 60	1	5	20	18.0785	6.07999
20180308	5	8	20	1.64908	6.35499
20180220 60	5	12	20	-7.81065	6.36
20180220 30	6	14	20	-10.3731	6.54673
20180220 30	6	10	20	-8.29416	6.55611
20180308	11	6	20	-5.32258	6.73961
20180220 30	6	2	20	-4.1518	6.80979
20180220 30	4	1	20	-6.53997	6.86439
20180220 60	4	12	20	-5.1078	6.91877
20180220 30	4	9	20	-4.66865	7.05009
20180308	4	8	20	-0.919746	7.10671
20180308	10	4	20	-7.57634	7.39633
20180308	11	13	20	-1.91207	7.48845
20180308	11	1	20	-5.2936	7.57173
20180220 30	3	1	20	-0.934626	7.64357
20180220 60	5	11	20	-8.07474	7.75508
20180220 60	4	10	20	-9.39545	7.85681
20180220 60	5	8	20	-7.33036	7.94095
20180308	6	4	20	-1.5302	8.00848
20180220 60	4	9	20	-9.02312	8.2238
20180220 60	4	4	20	9.82572	8.23008
20180308	11	2	20	0.896212	8.2945
20180308	10	10	20	-8.35451	8.39408
20180308	8	4	20	-6.26115	8.46165
20180220 60	2	6	20	2.38278	8.49645
20180308	10	7	20	4.37548	8.63453
20180308	9	3	20	-5.68356	8.84053
20180220 30	6	13	20	-1.91706	9.13087
20180220 60	5	3	20	-3.32307	9.28938
20180220 60	5	4	20	-5.60095	9.36098
20180220 30	4	6	20	-4.72337	9.38646
20180220 60	2	1	20	3.342	9.58814
20180220 60	3	10	20	-9.83299	9.7298
20180308	4	1	20	-4.01435	9.73006
20180220 60	6	19	20	-4.69737	10.012
20180308	7	11	20	4.53749	10.2186
20180308	9	2	20	-3.26367	10.333
20180308	10	2	20	-3.75034	10.5074
20180220 30	6	12	20	-9.37799	10.5567
20180220 60	3	2	20	-0.388513	10.5663
20180220 60	6	16	20	-4.89584	10.5826
20180308	5	6	20	2.22763	10.6433
20180308	8	7	20	-3.05478	10.6606
20180220 30	7	3	20	-7.75386	10.9078
20180220 60	6	5	20	-7.76893	10.9107
20180308	8	2	20	-6.1778	11.0663
20180220 30	3	4	20	-3.87461	11.1002
20180308	8	8	20	-3.31211	11.1087
20180220 60	2	8	20	16.5827	11.1271
20180308	6	11	20	-6.57994	11.5257
20180308	6	9	20	-1.94498	11.6777
20180308	10	9	20	-4.49741	12.0914
20180220 60	6	8	20	-9.66258	12.4235
20180220 30	3	3	20	-7.46352	12.5067
20180308	4	4	20	-0.534987	12.6021
20180220 60	5	9	20	1.62807	12.8916
20180220 60	4	1	20	-5.92418	13.0065
20180220 60	6	12	20	-13.3923	13.1492
20180220 60	5	13	20	-19.4689	13.1776
20180220 60	6	14	20	-11.4025	13.6304
20180308	5	5	20	-7.08442	13.7649
20180220 60	6	18	20	-5.47392	13.8867
20180308	9	7	20	2.80134	14.1003
20180308	5	11	20	0.636071	14.2073
20180220 30	3	5	20	-6.07054	14.2673
20180220 30	3	6	20	-3.0046	14.2901
20180308	11	9	20	-6.25964	14.3754
20180220 30	4	7	20	-5.42702	14.4758
20180308	11	12	20	-5.66358	14.5374
20180308	5	9	20	-9.84982	14.6129
20180220 60	5	10	20	-4.78896	14.6181
20180220 60	6	17	20	-11.2988	14.9145
20180308	5	13	20	-10.0669	15.0316
20180220 30	3	7	20	-1.4895	15.4499
20180220 60	6	10	20	-1.9831	15.7186
20180220 60	6	13	20	-5.38249	15.766
20180308	5	1	20	-6.23294	16.3368
20180308	11	5	20	-5.6005	16.6912
20180220 30	7	5	20	-3.93922	16.828
20180308	10	15	20	2.13004	17.1695
20180308	10	11	20	-7.04284	17.9675
20180220 60	3	3	20	3.9611	18.2945
20180220 60	3	4	20	-9.85272	18.4567
20180308	7	1	20	-0.167021	18.5911
20180308	11	4	20	-4.32581	18.7887
20180308	9	11	20	4.95713	18.8843
20180220 30	9	2	20	-2.09849	18.9396
20180308	10	1	20	-9.38525	18.9707
20180308	7	15	20	-11.7433	18.9991
20180308	8	9	20	-14.6776	19.2932
20180220 60	6	1	20	-4.50577	19.4698
20180308	9	13	20	-3.69488	19.6202
20180308	7	13	20	-5.24758	19.7208
20180308	11	8	20	0.275483	20.3553
20180308	8	6	20	-6.90312	20.4736
20180308	6	6	20	-5.44752	20.6279
20180308	4	5	20	-5.8316	20.9399
20180308	4	12	20	-10.1351	21.3699
20180308	5	2	20	-5.36225	21.4246
20180308	11	3	20	-1.3925	21.7789
20180220 30	4	4	20	-5.73333	21.8408
20180308	7	12	20	-7.4065	21.8519
20180220 30	6	3	20	-2.97735	21.9444
20180308	6	1	20	1.55628	22.3093
20180220 60	4	8	20	-7.82802	22.3264
20180308	10	12	20	4.87715	22.448
20180308	5	7	20	-1.17595	22.4939
20180220 60	6	4	20	-6.57535	22.7287
20180308	10	13	20	-1.7877	23.1934
20180308	6	2	20	-5.84476	24.1003
20180220 30	7	1	20	-6.50745	24.1517
20180220 60	6	22	20	-4.75751	26.1621
20180220 60	3	1	20	-12.8786	26.4932
20180220 60	6	7	20	1.93065	26.7232
20180220 60	6	9	20	-9.79499	26.8077
20180220 60	5	2	20	-7.09346	27.1336
20180220 60	6	2	20	-5.90379	27.3172
20180308	6	3	20	-5.65109	27.3276
20180220 60	5	1	20	-8.65244	27.3962
20180220 30	6	11	20	9.09165	27.468
20180220 60	6	11	20	-17.6441	28.17
20180308	5	4	20	-5.16411	29.2469
20180308	8	1	20	3.35349	30.1212
20180220 60	6	6	20	-19.2723	30.6142
20180220 60	4	5	20	-15.3599	31.7964
20180308	8	5	20	-4.73852	32.4117
20180220 30	5	2	20	-6.75883	34.0059
20180220 30	6	4	20	-7.85922	34.7709
20180220 30	7	4	20	3.57676	36.6214
20180308	7	7	20	-8.85217	37.5437
20180308	9	9	20	-11.2087	40.63
20180308	4	6	20	7.92756	41.8521
20180308	4	3	30	5.40258	-16.251
20180308	11	13	30	8.44912	-8.92374
20180220 60	3	9	30	0.307314	-4.72816
20180308	5	9	30	-0.129131	-4.24345
20180220 30	3	4	30	2.59746	-4.08027
20180308	8	4	30	-0.74672	-3.41141
20180308	11	1	30	-1.69419	-2.84284
20180220 60	4	4	30	0.943212	-2.64175
20180220 30	4	5	30	0.656328	-2.13185
20180220 30	6	9	30	5.585	-1.99848
20180308	5	13	30	-0.140158	-1.81268
20180308	6	1	30	3.5021	-1.7265
20180308	7	1	30	2.48537	-1.7057
20180220 60	4	7	30	0.268963	-1.34165
20180220 30	6	8	30	3.22426	-1.18678
20180220 30	4	6	30	6.53323	-0.6448
20180220 60	3	2	30	-1.26043	-0.601616
20180220 30	5	9	30	3.3682	-0.407091
20180220 30	5	5	30	0.287716	-0.350368
20180220 30	5	4	30	-0.333251	-0.282157
20180220 60	3	3	30	-4.53097	-0.2808
20180308	4	8	30	1.11541	-0.0520031
20180308	4	9	30	4.45472	0.0180419
20180220 30	5	1	30	2.86575	0.0240747
20180220 30	6	3	30	-0.177955	0.143226
20180220 30	5	7	30	3.60165	0.166354
20180220 60	5	2	30	-4.59477	0.197824
20180220 60	5	10	30	-5.21511	0.4264
20180220 30	4	9	30	4.95606	0.516667
20180220 60	5	7	30	-1.00002	0.86335
20180308	11	5	30	2.36042	1.0121
20180220 60	4	11	30	2.49045	1.02445
20180220 30	6	4	30	-26.0989	1.24969
20180220 60	2	6	30	0.155927	1.34322
20180220 60	1	9	30	-5.89189	1.36383
20180220 60	6	13	30	0.791301	1.3884
20180220 60	3	12	30	-2.44763	1.54445
20180220 30	6	1	30	0.869239	1.54724
20180308	6	5	30	-0.772084	1.56009
20180308	6	8	30	-0.899107	1.76183
20180308	6	11	30	-1.91611	1.83744
20180220 60	1	7	30	-1.93292	1.92977
20180308	5	5	30	-0.670562	2.14253
20180220 60	4	6	30	-1.29682	2.1478
20180220 60	3	4	30	-8.69706	2.17642
20180220 30	9	3	30	-1.67201	2.19455
20180220 60	6	21	30	-1.13708	2.26735
20180220 60	2	9	30	2.90474	2.37094
20180220 60	5	8	30	-2.08872	2.5169
20180308	9	1	30	-1.31002	2.54568
20180220 30	6	13	30	-0.096355	2.67383
20180220 30	9	4	30	-1.57019	2.68
20180308	8	7	30	-2.5817	2.80817
20180220 30	4	8	30	2.67735	2.93056
20180308	6	7	30	-2.72769	2.99538
20180220 60	1	6	30	5.45849	3.09063
20180220 60	6	17	30	-2.10496	3.13055
20180308	7	11	30	3.58887	3.17219
20180220 60	6	1	30	1.17703	3.32825
20180220 60	2	8	30	3.3248	3.35842
20180220 30	4	3	30	-0.443206	3.47711
20180220 30	5	10	30	-3.7574	3.56368
20180220 60	6	4	30	0.47427	3.67203
20180308	9	13	30	-1.5433	3.68146
20180220 60	5	5	30	0.391415	3.74425
20180220 60	6	16	30	-0.714299	4.02437
20180220 60	5	3	30	0.699745	4.0719
20180308	11	6	30	-3.56925	4.07482
20180220 60	2	1	30	4.36817	4.17243
20180308	7	7	30	-2.32621	4.29079
20180308	5	2	30	-0.175117	4.34491
20180220 60	4	2	30	-0.220688	4.38665
20180220 60	4	13	30	5.34859	4.47155
20180220 30	6	5	30	-3.05444	4.52922
20180308	4	7	30	-5.42073	4.53595
20180308	11	9	30	0.848084	4.55027
20180308	5	1	30	-5.82409	4.55547
20180220 60	5	9	30	-0.38101	4.59185
20180308	10	10	30	-2.12944	4.74679
20180220 60	3	11	30	-4.7788	4.75305
20180308	9	14	30	2.13463	4.78429
20180308	6	6	30	2.70328	4.87344
20180308	5	4	30	6.32701	5.05836
20180220 60	1	5	30	2.53325	5.0956
20180220 60	3	3	30	-3.49801	5.12676
20180220 60	5	4	30	-1.32254	5.22481
20180308	8	1	30	5.71344	5.25762
20180308	8	8	30	2.47687	5.30432
20180308	8	2	30	-4.04042	5.32165
20180220 60	6	5	30	-1.32794	5.33873
20180308	10	13	30	-0.00575497	5.59034
20180220 60	6	11	30	-4.51787	5.59555
20180308	9	3	30	-4.13225	5.61378
20180308	5	7	30	-5.94394	5.76195
20180308	8	6	30	3.13798	5.76195
20180220 30	6	2	30	-5.08813	5.76986
20180220 60	6	14	30	-5.87513	6.01155
20180220 30	4	1	30	-3.79484	6.11598
20180220 60	5	12	30	-2.77708	6.31374
20180308	11	11	30	1.14485	6.34438
20180220 60	6	19	30	3.11397	6.40675
20180220 30	6	15	30	0.834143	6.52441
20180220 30	4	7	30	-2.38461	6.59242
20180220 30	6	10	30	-6.30086	6.6563
20180220 60	6	8	30	1.70342	6.83325
20180220 60	5	1	30	-8.81309	6.85915
20180220 60	6	20	30	-1.35727	6.88525
20180220 60	5	13	30	-3.82425	6.93725
20180220 30	7	2	30	-1.74286	7.04643
20180220 60	6	12	30	0.113358	7.28045
20180220 30	3	5	30	-10.8549	7.48064
20180308	9	11	30	5.6734	7.71726
20180220 30	5	3	30	-6.33646	7.73492
20180220 30	9	2	30	-4.7191	7.96953
20180308	6	9	30	-7.40709	7.99548
20180308	11	3	30	3.53199	8.11249
20180220 30	7	3	30	-4.24374	8.24172
20180220 30	3	1	30	-1.82322	8.24397
20180220 60	3	7	30	0.417252	8.24723
20180220 30	6	14	30	-3.41877	8.27684
20180308	10	6	30	-4.83233	8.47038
20180220 60	5	11	30	-2.83947	8.6481
20180220 30	7	4	30	0.628055	8.6585
20180220 30	9	1	30	0.933401	8.76902
20180308	10	4	30	0.576768	8.77553
20180220 60	6	2	30	-8.03132	8.8301
20180220 30	6	11	30	8.40824	8.88585
20180308	7	15	30	1.1325	8.90554
20180308	5	12	30	3.44326	8.90987
20180308	10	11	30	8.90936	8.91854
20180220 60	4	9	30	-4.33133	9.13035
20180308	10	15	30	3.31563	9.13175
20180220 30	3	9	30	2.77989	9.25694
20180220 60	6	10	30	5.30806	9.3449
20180308	10	7	30	3.3214	9.36056
20180308	11	2	30	5.96793	9.79875
20180220 60	4	5	30	-0.578972	9.94348
20180308	9	2	30	-3.71293	10.0144
20180308	5	10	30	2.55847	10.0826
20180308	5	8	30	3.40584	10.2308
20180220 60	6	18	30	-1.72751	10.5805
20180220 30	5	2	30	-1.06785	10.7963
20180308	10	12	30	1.69584	11.1287
20180220 30	6	16	30	1.72117	11.1626
20180220 60	4	12	30	-3.97462	11.6347
20180308	7	13	30	-3.24962	11.6537
20180308	4	5	30	-5.98041	11.7007
20180308	11	8	30	2.54446	11.9954
20180308	5	6	30	4.58837	12.1074
20180220 60	4	1	30	-7.73549	12.1509
20180220 60	4	8	30	-12.8563	12.3143
20180308	8	3	30	-2.84025	13.2558
20180308	8	5	30	-0.888562	13.5
20180220 30	3	7	30	9.61777	13.6248
20180220 30	7	6	30	-0.499616	13.7227
20180220 60	3	1	30	7.48931	13.7303
20180220 60	6	22	30	-5.60542	13.7505
20180220 60	3	10	30	-2.50764	13.7627
20180220 60	3	8	30	-6.02743	13.9966
20180220 30	4	4	30	-2.72637	14.0998
20180220 30	3	6	30	1.28962	14.2814
20180308	4	12	30	-1.82615	14.4569
20180220 60	6	6	30	4.1629	14.9406
20180220 30	7	5	30	2.97407	15.0872
20180220 60	6	7	30	-2.47945	15.4034
20180220 60	6	9	30	1.3483	15.9546
20180308	7	5	30	-4.93069	16.6826
20180220 60	4	10	30	-6.34001	17.1032
20180308	10	14	30	-4.68672	17.5979
20180220 30	6	12	30	12.3506	18.3589
20180220 30	7	1	30	2.70717	18.5201
20180308	7	2	30	0.455011	19.1111
20180308	11	12	30	-0.0647242	20.3644
20180308	10	1	30	-5.04592	22.8274
20180220 30	6	6	30	-5.59596	22.8484
20180308	10	9	30	-1.38062	22.9854
20180308	11	4	30	-7.431	23.183
20180308	7	12	30	2.34413	24.2161
20180220 60	3	6	30	-15.1734	24.2174
20180308	4	6	30	4.70482	26.1204
20180308	8	9	30	-16.7423	28.881
20180308	9	9	30	-17.2474	32.11
20180308	4	1	30	-4.96002	32.2835
20180308	6	2	30	3.3846	33.5247
20180220 30	5	6	30	4.65883	44.688
20180308	8	2	40	1.13726	-8.1896
20180308	6	1	40	2.96253	-6.59502
20180220 60	6	8	40	2.21716	-4.3838
20180308	5	6	40	6.14123	-3.33017
20180220 60	1	5	40	-5.40793	-3.12535
20180308	7	14	40	5.08609	-3.06818
20180220 30	6	2	40	-0.49408	-2.85108
20180308	10	9	40	-1.02228	-2.65638
20180308	4	9	40	5.64853	-2.64176
20180220 60	3	4	40	-5.63229	-2.58933
20180220 30	9	1	40	4.33385	-2.45197
20180220 30	3	4	40	3.04948	-1.7888
20180308	10	7	40	0.948845	-1.75077
20180308	11	2	40	5.1294	-1.6225
20180220 30	5	4	40	3.36982	-1.59237
20180308	4	3	40	4.77655	-1.51849
20180220 60	5	13	40	-2.41229	-1.42485
20180220 60	2	1	40	-2.06249	-1.37952
20180308	11	1	40	2.70888	-1.04006
20180220 30	6	4	40	16.0196	-1.03505
20180220 60	3	11	40	0.682074	-0.970043
20180308	5	13	40	1.80646	-0.894454
20180220 60	5	11	40	0.139392	-0.83702
20180220 60	3	10	40	-0.526636	-0.780575
20180220 60	5	7	40	0.23923	-0.624
20180220 60	4	11	40	-0.144314	-0.5252
20180220 30	6	15	40	4.32364	-0.504409
20180220 60	5	5	40	3.99805	-0.40565
20180220 30	5	5	40	-0.804083	-0.34538
20180308	6	4	40	6.55683	-0.27735
20180220 30	5	1	40	-0.210737	-0.199022
20180308	11	9	40	4.14801	-0.104006
20180220 60	6	19	40	5.68707	5.68434e-15
20180308	7	1	40	1.89635	0.0208012
20180220 60	3	2	40	-0.211543	0.0294833
20180220 60	3	12	40	2.12444	0.0481684
20180220 60	6	16	40	2.20584	0.2653
20180220 30	4	5	40	1.84155	0.632244
20180220 30	6	9	40	16.1907	0.6485
20180220 60	1	7	40	2.10845	0.682237
20180308	9	11	40	3.62163	0.702042
20180220 30	5	9	40	3.10448	0.746718
20180220 30	7	3	40	-0.552653	0.74951
20180308	6	3	40	-2.64371	0.861766
20180308	11	4	40	-3.72805	0.894454
20180220 30	3	5	40	3.3955	0.924306
20180220 60	6	20	40	-1.08065	0.97235
20180220 60	1	9	40	1.55812	0.988539
20180220 30	9	2	40	0.309305	1.13365
20180220 60	3	3	40	1.32097	1.13389
20180220 60	2	9	40	16.9368	1.26253
20180308	5	9	40	2.17255	1.28968
20180220 60	5	10	40	-1.19345	1.3833
20180308	11	5	40	1.40193	1.40408
20180220 30	3	3	40	-1.38528	1.47622
20180308	5	7	40	-0.151116	1.58062
20180220 30	7	4	40	1.57702	1.59704
20180220 60	3	9	40	2.24592	1.63169
20180220 30	4	7	40	0.937485	1.64207
20180220 60	4	9	40	-0.316236	1.68745
20180220 30	3	1	40	0.0991032	1.71033
20180220 30	6	1	40	0.103297	1.73212
20180220 60	4	6	40	3.18234	1.76861
20180308	8	8	40	4.13134	1.80277
20180308	5	2	40	1.32533	1.80971
20180220 60	5	8	40	-0.276736	1.86749
20180308	4	5	40	0.0205486	1.90607
20180220 30	9	3	40	-1.38877	1.92405
20180220 60	6	1	40	-0.0394614	1.97605
20180220 30	4	9	40	0.649894	2.06987
20180220 60	4	12	40	-3.87424	2.09575
20180308	5	5	40	5.29246	2.16333
20180220 60	2	6	40	-0.84623	2.2247
20180220 60	1	6	40	-1.93778	2.2489
20180308	10	4	40	4.75004	2.39214
20180220 60	2	8	40	-4.97302	2.42482
20180220 60	6	22	40	-0.835621	2.51695
20180308	11	11	40	1.22358	2.54951
20180308	10	15	40	2.358	2.60016
20180308	11	3	40	6.04856	2.61749
20180308	5	11	40	2.70706	2.83788
20180308	10	13	40	7.09698	2.84496
20180220 60	4	7	40	2.95486	2.8802
20180308	10	14	40	-2.1582	2.95565
20180308	4	2	40	-2.13785	2.96418
20180220 30	6	3	40	-0.388463	2.98645
20180308	9	14	40	-2.75452	2.99602
20180308	4	12	40	3.43183	3.09939
20180220 30	5	2	40	1.63011	3.10023
20180220 30	6	13	40	1.47838	3.16059
20180220 60	5	1	40	-4.6236	3.1878
20180308	9	3	40	-2.85166	3.19909
20180220 60	4	13	40	-0.855254	3.27285
20180220 30	6	10	40	14.7548	3.27925
20180308	10	2	40	0.8343	3.28363
20180308	11	6	40	-1.75264	3.3542
20180220 60	6	14	40	0.661703	3.6975
20180220 60	6	21	40	2.57075	3.99895
20180220 60	5	2	40	-1.41705	4.0147
20180220 60	6	17	40	0.662772	4.1291
20180220 60	5	12	40	-0.0652976	4.25385
20180220 60	6	7	40	0.708446	4.3266
20180220 30	4	3	40	1.45721	4.39013
20180220 60	4	2	40	-1.97763	4.41976
20180308	7	2	40	-1.85406	4.54231
20180220 30	7	2	40	-2.27675	4.70105
20180220 30	7	6	40	-0.306766	4.71415
20180220 30	3	9	40	0.507217	4.909
20180220 60	4	4	40	-1.13869	4.95398
20180308	11	8	40	2.27276	4.9663
20180308	6	10	40	1.94511	5.0183
20180220 60	6	13	40	-0.562868	5.04435
20180308	6	8	40	0.78208	5.09631
20180220 60	3	3	40	-3.51271	5.22115
20180220 60	5	4	40	-0.506491	5.2471
20180220 60	5	9	40	0.532783	5.33169
20180220 60	6	18	40	0.530243	5.40182
20180308	6	6	40	6.42556	5.44993
20180308	9	7	40	4.04052	5.56433
20180308	7	15	40	4.58775	5.57473
20180308	7	11	40	0.903597	5.81268
20180220 30	5	6	40	12.2511	5.98035
20180308	8	6	40	7.06158	6.07396
20180220 60	5	3	40	-0.743594	6.12199
20180220 30	6	5	40	0.520054	6.14633
20180220 30	4	1	40	-2.79031	6.22674
20180220 60	4	1	40	-3.42958	6.35395
20180220 60	4	5	40	1.07661	6.76947
20180220 30	6	16	40	1.34172	6.81744
20180220 30	6	8	40	-1.38348	6.84007
20180308	5	10	40	3.41185	6.84361
20180308	8	7	40	-2.88053	6.96842
20180220 60	6	10	40	4.54752	7.34805
20180220 30	4	4	40	-0.112314	7.38435
20180308	7	5	40	-6.70509	7.38444
20180308	4	8	40	-1.98149	7.40524
20180220 60	6	12	40	1.0174	7.47795
20180308	11	7	40	4.68832	7.53005
20180220 30	3	7	40	-6.69977	7.6445
20180220 30	6	6	40	-2.7678	8.00566
20180308	7	12	40	6.00693	8.11249
20180220 60	6	9	40	2.80369	8.2322
20180308	9	9	40	-11.6825	8.2685
20180220 30	5	10	40	0.632806	8.38815
20180220 30	3	6	40	7.61469	8.40929
20180308	7	6	40	0.170632	8.49384
20180220 60	4	8	40	-0.520133	8.50376
20180220 60	6	4	40	0.204323	8.52335
20180308	6	12	40	-3.4529	8.54585
20180220 30	7	1	40	5.35111	8.57515
20180308	10	10	40	-0.37692	8.58052
20180308	5	4	40	8.00246	8.58052
20180308	5	1	40	-4.50898	8.71572
20180220 30	9	4	40	-0.328583	8.9393
20180308	8	1	40	2.39488	9.67258
20180220 60	3	1	40	5.20409	9.71415
20180220 30	6	14	40	8.53909	9.74677
20180308	7	13	40	2.47751	9.76173
20180308	10	1	40	4.74593	9.77128
20180308	4	7	40	-2.52149	10.3798
20180308	5	12	40	-1.19884	10.506
20180220 60	3	6	40	-5.68551	10.5513
20180308	8	5	40	0.144265	10.9987
20180220 60	4	10	40	-4.81959	11.2899
20180308	10	6	40	1.40501	11.5744
20180220 60	6	5	40	2.05623	11.7892
20180308	9	2	40	1.41672	11.9607
20180220 30	7	5	40	4.20793	12.096
20180308	4	1	40	-3.06618	13.6664
20180308	7	7	40	-0.869492	14.164
20180220 30	6	11	40	7.14632	14.7108
20180220 60	3	8	40	-5.60163	14.9716
20180220 30	6	12	40	-6.82658	15.1064
20180308	10	12	40	-0.903778	15.4345
20180308	5	8	40	0.811643	16.199
20180220 60	6	6	40	3.54933	17.0258
20180220 60	6	2	40	-9.39005	17.6032
20180220 60	6	11	40	0.520949	17.7954
20180220 30	5	7	40	0.662306	19.6364
20180220 60	3	7	40	4.42116	19.9121
20180308	6	2	40	2.93205	20.0296
20180308	8	9	40	-4.76703	22.9498
20180308	10	11	40	10.3067	23.9422
20180308	4	6	40	1.72879	32.1171
20180308	5	6	50	8.2994	-18.385
20180308	4	12	50	3.68306	-17.7157
20180308	7	1	50	4.71816	-13.8848
20180308	6	1	50	1.52352	-11.0247
20180220 60	6	4	50	-0.133846	-10.879
20180308	8	8	50	5.32526	-8.59092
20180308	6	4	50	9.72621	-8.3725
20180308	8	6	50	7.98032	-7.90448
20180308	5	10	50	4.8646	-7.47112
20180308	9	9	50	5.32263	-7.08777
20180308	6	6	50	7.53669	-6.32705
20180308	4	3	50	4.26064	-6.20571
20180308	8	7	50	2.27545	-5.8875
20180308	9	7	50	1.17356	-5.74115
20180308	5	9	50	3.54963	-5.23498
20180308	10	2	50	0.799621	-5.18298
20180308	4	8	50	-0.278736	-4.95763
20180308	5	2	50	1.2131	-4.21225
20180308	7	14	50	7.11676	-4.19492
20180308	11	6	50	7.87114	-4.08716
20180308	4	7	50	-3.2177	-4.07358
20180308	11	3	50	1.76886	-3.95224
20180308	4	1	50	2.97175	-3.89696
20180308	8	2	50	4.46566	-3.79026
20180220 60	5	11	50	3.03199	-3.75465
20180308	11	8	50	2.09124	-3.6572
20180220 30	9	1	50	1.4319	-3.57774
20180308	8	5	50	-1.90975	-3.53621
20180220 30	7	4	50	2.49626	-3.5196
20180308	4	5	50	3.84868	-3.41487
20180220 30	5	10	50	1.99732	-2.86371
20180308	4	6	50	2.56091	-2.79083
20180220 30	4	9	50	0.509852	-2.77926
20180308	10	4	50	7.25869	-2.64176
20180220 60	3	3	50	1.97612	-2.54217
20180220 30	5	6	50	12.5066	-2.5388
20180220 60	6	9	50	-0.973866	-2.35088
20180220 60	2	6	50	-1.67654	-2.32297
20180308	11	9	50	2.81622	-2.26214
20180220 60	4	12	50	1.457	-2.2465
20180308	10	14	50	4.8226	-1.9204
20180308	10	9	50	-0.707954	-1.89758
20180220 60	6	7	50	3.31021	-1.8254
20180220 30	5	9	50	-1.05086	-1.80436
20180220 30	4	7	50	1.24943	-1.74558
20180220 60	5	5	50	2.98134	-1.73175
20180220 60	2	9	50	0.480038	-1.67208
20180308	4	9	50	-1.2712	-1.56009
20180308	7	7	50	1.75699	-1.45609
20180308	9	1	50	1.16964	-1.45182
20180220 60	6	11	50	2.46346	-1.4353
20180308	10	7	50	-0.932674	-1.40408
20180220 60	2	1	50	3.1942	-1.35606
20180220 60	5	9	50	-0.261619	-1.31045
20180220 30	5	7	50	5.72474	-1.23076
20180308	5	5	50	11.2002	-1.23074
20180308	8	1	50	2.42586	-1.17874
20180308	9	13	50	1.54611	-1.08184
20180308	7	12	50	3.36944	-1.00539
20180220 60	6	22	50	0.104561	-0.9464
20180308	4	4	50	1.94588	-0.936056
20180220 60	5	7	50	2.594	-0.924821
20180220 30	6	4	50	9.97052	-0.860404
20180220 30	6	6	50	1.00238	-0.565624
20180220 30	6	2	50	3.36971	-0.559643
20180308	6	8	50	-0.558801	-0.520031
20180308	5	8	50	-2.83902	-0.354117
20180220 60	6	19	50	6.76513	-0.2653
20180220 60	4	9	50	3.28695	-0.16645
20180220 60	3	9	50	3.98386	-0.12485
20180220 60	3	7	50	4.32075	-0.0281541
20180220 30	6	1	50	-2.23249	0.0398052
20180220 30	6	9	50	13.7669	0.172849
20180220 60	3	6	50	-7.47653	0.26525
20180308	5	11	50	-0.145136	0.398691
20180220 60	5	3	50	0.0143661	0.45755
20180220 60	4	8	50	-2.18591	0.477389
20180220 30	5	5	50	2.00988	0.508258
20180220 60	5	10	50	1.52543	0.52
20180220 60	1	5	50	-0.941649	0.680346
20180220 60	5	2	50	1.17674	0.7384
20180220 60	3	2	50	1.30583	0.77485
20180308	5	13	50	5.64042	0.797381
20180308	5	12	50	-2.18718	0.849384
20180308	10	10	50	0.825878	0.884053
20180220 60	6	18	50	2.83303	0.88925
20180220 60	4	11	50	1.69885	0.9153
20180308	11	13	50	10.3741	0.995488
20180220 60	1	7	50	0.790237	0.995674
20180220 60	6	8	50	-0.322012	0.9985
20180220 60	3	10	50	1.02864	1.02792
20180220 60	6	13	50	0.785063	1.04005
20180220 30	6	15	50	3.13254	1.15944
20180220 60	5	1	50	-1.66799	1.1804
20180220 30	6	3	50	-3.30184	1.20102
20180308	5	1	50	0.5185	1.21687
20180220 60	6	16	50	0.686401	1.2377
20180220 60	4	10	50	-1.61745	1.26278
20180220 60	5	8	50	0.984078	1.3156
20180308	7	6	50	-0.810976	1.41709
20180308	5	7	50	1.6456	1.43875
20180220 60	6	20	50	1.14536	1.47165
20180220 60	5	13	50	1.07475	1.5133
20180220 60	5	4	50	-1.15677	1.59769
20180308	11	12	50	-4.34811	1.6901
20180220 30	4	5	50	2.10126	1.73095
20180220 60	4	4	50	-0.758868	1.78375
20180220 60	6	17	50	1.16774	1.85655
20180220 30	5	4	50	11.933	1.89985
20180220 60	6	21	50	5.60521	1.96045
20180220 30	4	3	50	0.634429	2.06443
20180308	7	5	50	1.69528	2.11479
20180308	6	9	50	-4.20252	2.14513
20180308	11	7	50	3.24197	2.18413
20180220 30	3	6	50	5.14198	2.21342
20180308	8	4	50	1.93767	2.23699
20180220 30	7	2	50	0.426921	2.24371
20180220 30	6	16	50	2.50978	2.25345
20180220 60	1	6	50	2.50097	2.27526
20180220 60	3	4	50	-4.34701	2.3973
20180220 30	3	4	50	0.478164	2.413
20180220 60	3	12	50	0.426989	2.43895
20180308	8	9	50	7.79017	2.44415
20180220 60	6	1	50	-4.26205	2.5014
20180308	10	1	50	8.43874	2.53082
20180220 30	5	1	50	-4.58261	2.7142
20180308	6	5	50	2.16105	2.89484
20180220 60	1	9	50	0.0767638	2.93497
20180220 60	6	12	50	0.380095	2.959
20180220 30	6	8	50	-1.93559	3.16637
20180308	7	2	50	1.04728	3.17219
20180220 30	3	9	50	0.860113	3.2658
20180220 30	5	2	50	1.72257	3.27053
20180220 60	3	1	50	0.229421	3.27105
20180220 30	9	3	50	-0.392936	3.35988
20180220 60	3	11	50	-1.22692	3.45396
20180220 60	6	10	50	2.00824	3.4738
20180220 60	4	5	50	1.35371	3.5622
20180308	7	13	50	2.16738	3.75125
20180220 60	6	14	50	2.4547	3.80135
20180308	10	6	50	1.88462	3.86903
20180220 60	2	8	50	-1.01653	3.97749
20180220 30	7	6	50	-1.15476	4.1134
20180220 30	4	4	50	0.522397	4.12063
20180220 30	7	3	50	1.94196	4.13425
20180220 30	6	12	50	-4.09637	4.22577
20180220 60	6	2	50	-6.39174	4.3319
20180220 30	6	5	50	4.45889	4.43983
20180308	11	5	50	-1.98385	4.73369
20180220 30	9	2	50	2.56051	5.07555
20180220 60	4	7	50	-6.1463	5.22635
20180220 30	7	5	50	4.76608	5.4187
20180308	9	14	50	0.0574958	5.44993
20180220 30	3	3	50	1.99863	5.49383
20180220 60	5	12	50	2.12368	5.5903
20180220 30	6	14	50	6.99035	5.72035
20180308	10	15	50	1.71061	5.75126
20180308	7	15	50	0.813376	5.79835
20180308	8	3	50	-2.11589	5.91721
20180220 60	3	3	50	-1.05556	5.9856
20180308	6	11	50	2.43312	6.11903
20180308	9	3	50	4.01611	6.15547
20180308	11	4	50	0.00461085	6.32358
20180220 60	4	13	50	0.105746	6.4432
20180220 30	6	13	50	4.88514	6.47591
20180308	9	2	50	11.4135	6.66407
20180220 60	6	5	50	0.0154598	6.68245
20180308	6	12	50	-0.523325	6.76041
20180308	11	11	50	1.35315	6.85141
20180220 60	6	6	50	-1.73086	6.87485
20180308	11	1	50	-0.144347	7.13243
20180220 30	6	11	50	2.58301	7.32253
20180308	6	10	50	8.88171	7.46245
20180308	10	11	50	7.6997	8.07088
20180220 30	4	6	50	-2.22367	8.09014
20180220 30	9	4	50	-1.28774	8.18005
20180220 30	6	10	50	-24.2029	8.33085
20180308	6	3	50	-1.69099	8.42451
20180308	6	2	50	2.98492	8.66223
20180220 30	3	5	50	1.16452	9.10061
20180308	7	11	50	0.920801	9.75579
20180220 60	4	2	50	-1.22069	10.1978
20180220 60	4	6	50	8.69635	10.3142
20180308	4	2	50	0.330997	10.3338
20180220 60	3	8	50	3.52157	10.6501
20180308	11	2	50	0.0846986	11.3001
20180220 30	4	1	50	-1.63563	11.8371
20180220 60	4	1	50	0.388871	12.2717
20180308	6	7	50	-1.56137	12.3421
20180308	10	12	50	0.368209	12.6888
20180308	9	11	50	1.47248	14.1582
20180220 30	7	1	50	3.94857	14.4846
20180308	5	4	50	5.78391	15.4722
20180220 30	3	1	50	0.213774	16.1804
20180308	10	13	50	-0.607307	23.8044
20180220 30	3	6	60	2.10553	-13.6874
20180220 60	6	7	60	2.83129	-6.6668
20180220 60	6	20	60	0.188884	-6.1468
20180220 60	6	12	60	0.911332	-4.92465
20180220 60	3	7	60	-1.61619	-4.4567
20180220 60	5	7	60	3.01379	-3.1254
20180220 30	5	10	60	3.45881	-3.09512
20180220 30	3	9	60	1.46194	-3.037
20180220 60	5	13	60	3.01064	-2.9485
20180220 60	6	13	60	1.8856	-2.9433
20180220 60	2	1	60	3.67417	-2.5274
20180220 30	9	1	60	-0.344171	-2.06975
20180220 30	6	10	60	13.9982	-2.05935
20180220 30	5	4	60	2.91856	-1.80612
20180220 60	1	7	60	1.09726	-1.56064
20180220 30	4	5	60	4.03871	-1.47592
20180220 60	5	11	60	3.15046	-1.4509
20180220 60	2	9	60	0.59222	-1.433
20180220 60	2	6	60	-0.746981	-1.38425
20180220 60	4	13	60	4.75615	-1.3469
20180220 60	5	4	60	-0.235227	-1.3208
20180220 60	5	1	60	1.02015	-1.285
20180220 60	6	19	60	3.20203	-1.2845
20180220 30	6	15	60	1.13738	-1.25639
20180220 30	6	9	60	6.35577	-1.19923
20180220 60	4	1	60	2.5842	-1.1544
20180220 60	6	17	60	-2.03846	-1.1129
20180220 30	5	7	60	0.574635	-1.02519
20180220 30	5	2	60	-0.242452	-0.921342
20180220 30	6	4	60	-2.19206	-0.888574
20180220 30	6	2	60	5.54766	-0.771737
20180220 30	6	11	60	1.53406	-0.683815
20180220 60	5	10	60	1.35099	-0.68125
20180220 60	4	12	60	1.45757	-0.67605
20180220 60	4	11	60	-0.147591	-0.54085
20180220 60	6	11	60	2.42974	-0.43165
20180220 60	6	8	60	0.785404	-0.0052
20180220 60	1	6	60	3.71855	0.0973343
20180220 60	6	1	60	4.5214	0.1507
20180220 60	1	9	60	1.42674	0.1508
20180220 60	2	8	60	0.0088672	0.201603
20180220 30	7	4	60	1.12173	0.22802
20180220 60	5	8	60	2.90655	0.39005
20180220 60	6	14	60	2.39701	0.6188
20180220 60	4	9	60	1.82781	1.00365
20180220 60	5	12	60	-0.345795	1.01405
20180220 30	7	6	60	2.48899	1.02269
20180220 30	6	16	60	1.83337	1.03097
20180220 60	3	3	60	-1.13888	1.18045
20180220 60	3	11	60	-0.490742	1.21685
20180220 30	9	4	60	-0.540456	1.23006
20180220 60	6	5	60	1.63331	1.32085
20180220 30	4	3	60	2.73382	1.32608
20180220 60	6	22	60	-1.95581	1.3781
20180220 30	3	1	60	1.1995	1.3936
20180220 30	5	3	60	0.847626	1.42363
20180220 60	3	2	60	1.23483	1.6017
20180220 60	3	9	60	2.95913	1.62255
20180220 60	5	3	60	-0.657479	1.65375
20180220 30	6	8	60	-2.21042	1.74008
20180220 60	3	12	60	-2.48468	1.9813
20180220 60	1	5	60	0.412688	1.98246
20180220 30	5	9	60	-3.62149	2.11229
20180220 30	4	9	60	-0.0216835	2.11376
20180220 30	6	3	60	-1.59499	2.1322
20180220 60	6	16	60	-1.27138	2.18581
20180220 30	7	1	60	2.7717	2.2167
20180220 60	3	1	60	-0.449568	2.45368
20180220 30	5	6	60	-2.44239	2.45905
20180220 30	7	2	60	1.0552	2.65544
20180220 60	4	10	60	-0.213731	2.70636
20180220 30	7	3	60	4.13933	2.7145
20180220 60	3	10	60	-1.83587	2.74055
20180220 30	9	3	60	-2.25491	2.81432
20180220 60	6	21	60	3.71103	2.8705
20180220 30	4	4	60	-0.924334	3.03353
20180220 60	6	2	60	-4.42606	3.26065
20180220 30	5	5	60	1.33145	3.328
20180220 60	5	9	60	1.47662	3.3438
20180220 60	6	10	60	2.26278	3.505
20180220 60	3	3	60	-1.13264	3.95982
20180220 60	6	18	60	0.495022	4.1031
20180220 60	6	4	60	1.48786	4.12385
20180220 60	3	8	60	-1.90287	4.34092
20180220 30	6	6	60	0.373	4.82075
20180220 60	4	6	60	-0.46433	5.08075
20180220 60	4	2	60	1.01857	5.14213
20180220 60	4	5	60	1.71435	5.3147
20180220 30	4	7	60	0.940523	5.68105
20180220 30	3	4	60	-2.21396	5.8452
20180220 60	3	6	60	0.0966505	5.86595
20180220 30	4	1	60	1.35223	5.94838
20180220 60	5	2	60	-5.30704	6.204
20180220 60	4	4	60	0.321093	6.27675
20180220 60	6	9	60	-0.913147	6.3964
20180220 60	5	5	60	-2.97873	7.0517
20180220 60	6	6	60	-2.47924	7.21795
20180220 30	3	5	60	-0.13093	7.5718
20180220 60	4	8	60	-1.73639	7.9825
20180220 60	3	4	60	-2.47687	8.32055
20180220 30	9	2	60	2.43146	9.2774
20180220 30	7	5	60	6.16586	9.43335
20180220 30	6	13	60	4.53576	10.5184
20180220 30	6	5	60	5.17268	11.5469
20180220 30	6	14	60	4.18631	11.817
20180220 30	6	1	60	-3.62123	12.9824
20180220 30	6	12	60	5.39506	13.9094
20180220 30	5	1	60	-2.7154	15.2633
20180220 60	4	7	60	14.4104	19.08
[truncated: 4 more columns]
