# Supplementary material for: A mechano-osmotic feedback couples cell volume to the rate of cell deformation
Source: eLife journal article supplement (doi:10.7554/elife.72381), 2022-04-13
Supplement: supp [file ControlSpreading_ordered.xlsx]

## Sheet: Sheet1
100	99.6643	99.5037	99.414	99.2589	99.0497	98.8693	98.7658	98.6589	98.475	98.3653	98.2475	98.0778	97.8605	97.7547	97.549	97.3856	97.318	97.1391	97.0809	96.8782	96.8408	96.6762	96.4792	96.4724	96.3295	96.3034	96.2123	95.9705	95.902	95.9305	95.8281	95.7056	95.7982	95.6979	95.7582	95.6051	95.669	95.6829	95.6832	95.7488	95.7613	95.7513	95.8896	96.0254	96.1308	96.0095	96.1669	96.2124	96.4912
6.57835e-15	0.890612	1.28981	1.77529	2.02203	2.36674	2.65571	2.83142	3.03588	3.23085	3.30029	3.53416	3.51266	3.74187	3.80667	3.86674	3.84917	4.01272	4.12868	4.34426	4.45992	4.52782	4.7176	4.69289	4.79498	4.98415	5.08365	5.12829	5.31076	5.32057	5.47372	5.4994	5.57995	5.6704	5.56744	5.74511	5.79763	5.83701	5.82864	5.86264	5.8754	5.8898	6.03378	5.98428	6.09958	6.13726	6.00286	6.1139	6.12422	6.28702
a_f	a_f_st		v_f	v_f_st		a_n	a_n_st		v_n	v_n_st		a_s	a_s_st		v_s	v_s_st					Max V loss	stdev	Final Area	stdev	Final Area averaged for last 5 poitns
35.7633	17.1499		100	3.79801e-15		28.3318	15.3379		100	3.06479e-15		28.0563	17.3217		100	6.57835e-15		0		fast	-7.68633	4.58017	562.243	217.932	619.411	31.3813
59.7405	20.5932		99.459	0.767315		47.0581	19.5114		99.6402	0.789157		38.89	20.7742		99.6643	0.890612		1		normal	-5.97736	4.46575	406.738	135.94
93.6982	44.4132		99.071	1.39624		58.559	22.3612		99.5019	1.27879		52.0455	20.7781		99.5037	1.28981		2		slow	-4.39487	5.79763	329.813	129.983
115.101	59.4825		98.6228	2.10593		71.586	22.3433		99.1087	1.64841		47.2231	23.4513		99.414	1.77529		3
145.241	60.3465		98.0863	2.73006		79.3248	27.233		98.7705	2.0152		63.3757	22.9432		99.2589	2.02203		4
183.302	97.8827		97.5031	3.151		94.2401	28.5687		98.6088	2.62754		67.5434	24.5312		99.0497	2.36674		5
216.017	88.5483		96.9273	3.56904		103.335	33.2159		98.3324	2.94859		69.8963	22.3368		98.8693	2.65571		6			92.3137	-7.68633
255.257	85.3617		96.3738	3.84247		124.388	28.1245		98.083	3.06705		71.3744	23.972		98.7658	2.83142		7			94.0226	-5.97736
284.841	89.6931		95.8966	3.98269		140.073	33.2383		97.6579	3.20332		83.7054	21.9481		98.6589	3.03588		8			95.6051	-4.39487
317.685	100.116		95.3675	4.17484		157.723	36.5064		97.3538	3.29383		88.2244	20.1701		98.475	3.23085		9
330.786	107.143		94.8482	4.23749		175.979	43.4884		97.0271	3.52563		97.2245	29.8161		98.3653	3.30029		10
386.154	130.133		94.5171	4.45105		199.647	56.1647		96.7053	3.55912		96.5726	36.9848		98.2475	3.53416		11
355.386	112.703		94.1774	4.43802		196.977	55.7566		96.4073	3.64438		109.536	37.4619		98.0778	3.51266		12
396.677	118.702		93.7996	4.51635		227.868	66.5688		96.1558	3.64857		120.801	45.5784		97.8605	3.74187		13
389.433	130.503		93.5425	4.47185		233.194	75.1854		95.8393	3.82342		147.744	55.3602		97.7547	3.80667		14
431.338	123.992		93.3118	4.43109		246.54	76.6545		95.566	3.92993		147.114	57.2809		97.549	3.86674		15
437.887	150.618		93.037	4.49876		265.88	79.005		95.3052	3.96399		165.468	79.526		97.3856	3.84917		16
463.5	136.642		92.9375	4.47695		289.003	83.5841		94.9665	4.03913		154.893	65.8738		97.318	4.01272		17
452.289	156.898		92.7447	4.50946		250.447	65.9296		94.7096	4.10932		215.202	71.4846		97.1391	4.12868		18
474.568	161.45		92.585	4.44279		312.345	100.979		94.5024	4.04566		191.76	92.2946		97.0809	4.34426		19
465.03	154.455		92.6016	4.52477		319.487	77.6366		94.2924	4.28754		203.895	87.7885		96.8782	4.45992		20
521.886	152.985		92.4865	4.45249		297.522	101.161		94.2601	4.29775		203.027	87.2381		96.8408	4.52782		21
499.607	163.929		92.3921	4.50515		312.353	57.568		94.1968	4.43781		223.434	83.3063		96.6762	4.7176		22
574.609	141.513		92.3137	4.58017		316.009	122.541		93.983	4.21273		199.914	70.4649		96.4792	4.69289		23
494.8	183.998		92.2697	4.57739		349.64	85.5781		94.0226	4.46575		244.854	103.799		96.4724	4.79498		24
513.843	155.973		92.3028	4.64577		295.714	100.821		94.0314	4.50054		221.741	64.8631		96.3295	4.98415		25
511.859	193.709		92.3735	4.6381		325.065	94.0007		94.0396	4.56065		269.019	90.109		96.3034	5.08365		26
603.52	148.906		92.3596	4.70372		340.152	137.224		94.0049	4.70378		232.887	102.684		96.2123	5.12829		27
531.931	205.058		92.4519	4.65435		364.402	97.61		93.9504	4.67884		269.535	103.768		95.9705	5.31076		28
474.483	122.565		92.5766	4.71129		360.486	131.233		94.054	4.76501		265.484	107.581		95.902	5.32057		29
541.639	199.352		92.6796	4.6844		347.247	69.6741		94.1264	4.87298		281.291	96.5336		95.9305	5.47372		30
558.063	202.893		92.7818	4.65046		335.067	136.836		94.185	4.8838		251.27	91.7736		95.8281	5.4994		31
566.101	191.487		92.8445	4.60608		385.373	115.813		94.3055	5.07916		294.179	95.1593		95.7056	5.57995		32
601.715	126.396		92.9495	4.5774		354.048	131.817		94.4561	5.05348		265.294	94.4373		95.7982	5.6704		33
554.595	179.835		93.1761	4.58769		361.495	85.0165		94.5221	5.15608		328.155	110.466		95.6979	5.56744		34
529.478	204.708		93.1873	4.63482		382.73	167.928		94.6554	5.10252		297.811	137.058		95.7582	5.74511		35
600.656	213.382		93.3917	4.6504		392.641	134.165		94.8101	5.29381		302.517	88.9537		95.6051	5.79763		36
632.843	124.643		93.4997	4.5496		356.845	141.819		94.9707	5.46679		302.185	138.852		95.669	5.83701		37
617.283	242.26		93.6012	4.57877		392.216	92.53		95.1346	5.46986		278.945	86.1883		95.6829	5.82864		38
558.04	111.749		93.7082	4.62353		406.078	151.791		95.1994	5.59368		346.789	124.479		95.6832	5.86264		39
594.654	229.79		93.7872	4.5918		386.828	99.2734		95.3076	5.54593		309.009	122.235		95.7488	5.8754		40
603.947	83.0281		93.895	4.6228		426.397	193.281		95.5138	5.71631		306.778	94.3939		95.7613	5.8898		41
633.72	233.278		94.1105	4.67485		346.653	87.8656		95.6801	5.7368		335.07	116.159		95.7513	6.03378		42
565.101	172.057		94.0995	4.57831		489.364	184.592		95.7382	5.75172		274.611	127.508		95.8896	5.98428		43
601.934	212.944		94.1804	4.51295		378.293	122.538		95.8763	5.77521		357.143	146.054		96.0254	6.09958		44
607	123.368		94.3163	4.53907		433.521	137.376		95.919	5.74838		317.791	96.264		96.1308	6.13726		45
616.003	249.566		94.3454	4.59026		372.958	100.149		96.0607	5.68381		326.697	131.096		96.0095	6.00286		46
624.095	134.244		94.3985	4.57078		405.012	143.549		96.2431	5.68988		347.433	104.22		96.1669	6.1139		47
641.865	259.599		94.5463	4.55304		407.548	96.2218		96.3544	5.72389		357.998	131.349		96.2124	6.12422		48
652.847	121.841		94.6386	4.59519		415.775	182.51		96.5118	5.63216		296.907	128.624		96.4912	6.28702		49
562.243	217.932		94.6571	4.62042		406.738	135.94		96.5181	5.73636		329.813	129.983		96.5787	6.38983		50
[truncated: 1 more columns]

## Sheet: ThreeGroups
Group\Time	1	2	3	4	5	6	7	8	9	10	11	12	13	14	15	16	17	18	19	20	21	22	23	24	25	26	27	28	29	30	31	32	33	34	35	36	37	38	39	40	41	42	43	44	45	46	47	48	49
AvgArea_SlowSpreading	28.0563	38.89	52.0455	47.2231	63.3757	67.5434	69.8963	71.3744	83.7054	88.2244	97.2245	96.5726	109.536	120.801	147.744	147.114	165.468	154.893	215.202	191.76	203.895	203.027	223.434	199.914	244.854	221.741	269.019	232.887	269.535	265.484	281.291	251.27	294.179	265.294	328.155	297.811	302.517	302.185	278.945	346.789	309.009	306.778	335.07	274.611	357.143	317.791	326.697	347.433	357.998
AvgVolume_SlowSpreading	1832.28	1825.99	1823.12	1821.24	1818.62	1814.98	1811.65	1810.1	1808.41	1804.77	1802.66	1800.24	1796.99	1793.4	1791.01	1786.86	1784.44	1782.55	1779.19	1777.87	1773.88	1772.91	1769.65	1766.35	1765.55	1762.66	1761.66	1760.13	1755.88	1754.51	1754.37	1751.96	1749.81	1751.26	1749.38	1750.54	1747.64	1748.61	1749.03	1749.08	1750.16	1750.48	1750.04	1752.71	1754.76	1757	1755.05	1757.77	1758.84
AvgArea_NormalSpreading	28.3318	47.0581	58.559	71.586	79.3248	94.2401	103.335	124.388	140.073	157.723	175.979	199.647	196.977	227.868	233.194	246.54	265.88	289.003	250.447	312.345	319.487	297.522	312.353	316.009	349.64	295.714	325.065	340.152	364.402	360.486	347.247	335.067	385.373	354.048	361.495	382.73	392.641	356.845	392.216	406.078	386.828	426.397	346.653	489.364	378.293	433.521	372.958	405.012	407.548
	1783.3	1776.49	1773.89	1766.76	1760.84	1758.2	1753.4	1748.91	1741.81	1736.17	1730.47	1724.56	1719.64	1715.1	1709.82	1704.68	1700.1	1694.22	1689.68	1686.1	1682.27	1681.98	1680.69	1677.01	1677.5	1677.69	1677.67	1677.09	1675.89	1677.52	1678.56	1679.54	1681.23	1683.65	1684.48	1686.66	1689.49	1692.15	1695.02	1696.11	1697.78	1701.42	1704.07	1705.19	1707.89	1708.51	1711.06	1714.07	1716.28
AvgArea_FastSpreading	35.7633	59.7405	93.6982	115.101	145.241	183.302	216.017	255.257	284.841	317.685	330.786	386.154	355.386	396.677	389.433	431.338	437.887	463.5	452.289	474.568	465.03	521.886	499.607	574.609	494.8	513.843	511.859	603.52	531.931	474.483	541.639	558.063	566.101	601.715	554.595	529.478	600.656	632.843	617.283	558.04	594.654	603.947	633.72	565.101	601.934	607	616.003	624.095	641.865
AvgVolume_FastSpreading	1967.54	1956.99	1949.65	1941.28	1931.39	1920.66	1910.03	1900.03	1891.37	1881.28	1870.92	1864.53	1857.67	1849.64	1844.22	1839.08	1833.25	1830.69	1826.19	1822.81	1822.16	1819.49	1816.86	1814.63	1813.48	1814.14	1814.66	1814.22	1816.14	1817.93	1819.95	1821.65	1822.72	1824.5	1828.42	1828.26	1832.44	1834.34	1835.91	1837.84	1839.7	1841.59	1845.64	1845.37	1846.83	1849.42	1849.71	1851.22	1853.62
[truncated: 2 more columns]

## Sheet: Area_FastSpreading
Cell\Time	1	2	3	4	5	6	7	8	9	10	11	12	13	14	15	16	17	18	19	20	21	22	23	24	25	26	27	28	29	30	31	32	33	34	35	36	37	38	39	40	41	42	43	44	45	46	47	48	49
1	54.707	72.076	290.905	373.798		449.515	499.75	531.992	607.084	647.647	667.824	751.757	764.758		777.031		912.343		945.521		968.922		1030.7		1076.57		1093.73		1111.93		1101.32		1118.38		1138.56		1157.17		1208.35		1259.52		1334.71		1264.72		1326.81		1329.1
2	49.611	108.583	165.578	186.483	264.904	425.074	391.792	420.289	424.97	508.383	561.426	508.695	592.316	634.334	682.593	715.979	758.31	752.589	747.493	755.189	776.823	796.48	784.831	779.839	812.601	858.572		845.363	881.973		901.942		908.391		968.298		982.755		988.475		995.444		1004.28		994.196		1037.77		1015.93
3	44.723	66.98	143.113		224.862	215.085	301.098	330.012	444.627	468.756	558.514	574.427	637.558	694.866	679.993	705.474		768.502		791.904		769.542		786.599		828.722		848.899	858.156		820.193	813.537		826.954		839.746		860.34		844.115	828.202		858.26		827.162	807.401		820.401
4	37.8583	73.9484	116.071	185.235		309.523		372.446		450.035	442.339		466.468	487.633	508.799		540.208			598.868					658.776					650.247					626.118					626.222					645.359
5	11.1287	36.1942	86.5332	135.416	165.162	226.11		317.531		328.452		363.398		395.64		422.473		441.091	473.436			547.073					648.895							710.987									712.547
6	33.282	61.3637	113.679		142.697		247.639		298.914	354.349		433.81	458.252				537.608				558.202								532.616						551.961						585.347					631.318
7	16.329	19.657	59.596	89.341		70.204		273.12		316.803		328.66	332.092	318.259		382.015		382.847	383.263	391.896		398.24		425.802		412.697		433.706		434.746		439.842		450.555		473.228		470.524		461.58	461.372	475.205		478.845		459.604	468.132	487.477
8	5.096		67.812		89.861				281.857	296.73	339.892		355.285	418.729	406.144	479.053		472.708	535.32		544.681		574.947		604.276		614.469	605.316	603.548		612.077		671.984		645.879		731.58		704.018		728.148		800.848		759.87		778.071		681.033
9	53.043	82.061	113.055	147.169	317.427		332.612		323.355	319.611			375.775	369.326	452.427	477.077	544.993	470.94	538.96	526.792		501.518	541.769	562.466	555.497	619.565	627.99	632.462	641.511	651.391	625.078	687.169	710.155	668.552	678.745	688.417	714.523	716.811	729.604	729.188	705.786	728.668	725.132	748.325	780.671	759.558	759.142	822.897	832.57
10	49.819	109.103	158.714		198.132		288.513		333.964		398.864			441.611			534.8			576.299			627.678					683.321					677.809					754.981							729.292
11	49.403	87.053	82.685		230.27		298.914		315.971	340.828	370.782	396.888	403.232	463.66	480.093	563.402	575.779	572.138	682.593	645.567	645.567	728.876	696.322		726.9	696.53		712.235		681.657		673.024		654.303	650.247		682.073	666.784		647.959		616.861	628.198		623.517	619.981		604.9
12	24.441		76.341	105.046		130.112	228.918	265.424	277.385		314.307	338.644	332.404		349.669	369.43		409.473			383.783			429.65		464.804				495.07	531.368				513.479					556.641			583.579		602.196
13	10.505	35.05	43.475	73.428	85.285		141.24		238.174	297.25	299.85		360.278		344.261		459.604		444.835		434.226		457.419		468.028		493.302		507.759		505.886		524.087		547.281		502.974		509.943		498.918		507.134		516.599		526.688		541.561
14	55.539	51.899	59.596	87.157	94.438		159.442			332.612		363.71	353.413	429.026		415.297		450.867		440.778		486.853		490.805	506.614	505.366		495.382		539.688		547.905		553.521		581.083		600.636		642.239		639.118		671.256		664.808		674.897
15	13.521	36.714		85.181	94.23			249.199	267.504		278.529		393.976		395.744		405.728	468.444		470.836	521.071		543.329		618.733		628.302		613.845		639.222		655.551		646.919		692.162		702.562		701.21		720.763		745.933		731.372		744.893
16	76.1326		124.183		221.013		242.751		327.932		358.926			397.512		443.483			492.262		501.154		510.047							497.358					543.017					538.544					535.944
17	17.473	47.427	49.195	65.004	96.726	84.245		182.531	220.805	260.848	308.171	318.051	344.885	413.009	418.105	419.353	438.594		471.044		475.725	519.927	526.48		545.929		574.739		626.118		648.687		689.665		709.531		775.263		775.887		777.447		774.015		786.599		771.102		777.447
18	34.9461	69.9962		110.559		180.347		252.631		280.713			324.187				357.365					399.384					436.098				488.517				472.812					464.7				407.392				455.235
19	60.3236		94.1257	171.298			258.664			296.938			319.507		327.516		335.524				430.898					443.171							510.255							530.12					499.646
20	28.186	40.25	70.516	78.421			120.855				312.331		420.185		420.289		490.701		534.176		631.318		610.829	666.784	655.239		719.931		738.86		741.877		769.542		855.867		843.595		873.653		842.971			849.523	846.715		839.018		818.113
21	14.145	80.709	96.206	89.965	118.775	123.767			273.536		284.873		307.442		350.917		372.758		383.991		420.081		442.859		455.755		468.444		476.661		485.605		470.836		487.373		480.405		466.572		453.259		483.525		460.124		474.269		473.02
22	41.082	58.139	110.247		172.234	193.556	253.671	284.041	255.023	261.368	292.362		309.315	348.525		345.093				411.761			401.568		493.926			475.725		510.047			586.803		593.46		575.259		627.366	628.51		640.47	661.48	685.609		730.644		722.843
23	27.666	45.035	59.908	57.515	83.205		104.214		254.607		272.808		287.577		299.122		305.674		341.869		345.613		347.069		359.342		365.166		368.078		367.87		385.343		377.335	387.111	391.584		396.16		394.6		378.479		394.808		401.048		404.272
24	66.772		112.951				218.517	251.487	263.24				304.114								328.66					351.749							357.677								397.824						393.456
25	55.331	68.852	82.685	77.173	89.029	102.342	213.109		259.704	256.063	279.465	301.618	306.402		317.219	329.492		353.413	322.419	342.805	333.132		332.092		357.365	346.133			349.357	375.463	361.838		373.798		394.704		412.801		416.649		446.707		457.419		447.227	450.763	446.187		423.929
26	20.2812		81.3329				137.6	226.214					280.401					347.381			390.855				431.522					442.235					477.389					488.205					437.97
27	35.6741	68.3321	98.1819	118.671	153.721	211.549		204.476		263.448		279.777	309.523	316.595	382.431		408.537				460.436					440.258			476.245					461.684				481.549					491.014					508.591
28	28.394	35.986	85.805	144.569	189.187	196.052	228.502	235.886	255.335		237.966		264.696		258.976		268.024		275.305		282.897		295.066		280.193		297.458		292.986		298.914		312.227		307.858		310.875		305.466		308.171		319.923		318.779		334.484		316.283
29	35.3621	41.7065	61.8837	87.0532	146.753		165.786							157.257						161.002					164.434		170.778		181.075	166.306	178.579	186.899				207.284								284.249
30	24.6495	53.1472	71.8683	120.543	128.448		166.93		234.534		267.4	268.336	274.577			315.555				334.276					391.168					437.97					453.155						442.651				459.916
31	14.3529	34.01	52.7312	67.8121	108.166		123.663		223.613		233.702		289.345		335.42					373.07			403.856						435.682						442.651						453.467					436.306
32	28.2897	69.6842	114.303	102.758		179.931		205.1		242.647			238.798		265.528			346.133			362.566		403.96			439.946		407.913	385.655		435.89			487.165			484.461			495.59				462.724			534.592
33	59.492	74.052	86.429	79.565	101.406	122.623	123.975	173.274		262.512	293.922			358.926	377.959		399.904		444.107		445.251		463.244		483.837		479.573		526.272		514.831		543.017		580.771		586.595		606.98		604.692		636.726		637.87		661.272		659.816
34	27.77	67.708	61.468	93.606	102.238	117.735	144.985		162.458	245.663	281.857		283.521	327.204	353.101	378.271	438.178	457.419	504.014		523.983		507.55		546.865	556.849	572.45		587.323	576.715	598.764		555.081		590.547		621.541	632.254			604.38		642.447		611.869		623.205		650.455
35	23.7134		82.0609		120.647		143.217		179.307		278.737		309.835		314.307		341.036		333.444			394.496		454.923				498.398			471.772		503.078							584.099						606.148
36	31.202		82.165	101.822	105.878	128.448		199.796	240.254		239.214		282.481		310.043		370.262		416.129		378.583		460.54		410.617		423.825		434.746		479.781		488.933		517.119		488.101		514.623		531.472		563.402		539.896		548.945		554.977
37	47.739	62.612		173.378	184.923	196.052	209.573	200.94	228.71		283.625	316.595		296.626	323.355		309.627		358.718		334.484		369.846		444.003	431.314	434.122		448.475	428.194	479.469		541.249		484.565		514.727	511.711		508.799		523.359		497.982		510.463		519.615
38	23.089	58.035	63.548	89.133	88.717	122.623	164.538	175.667		205.204	253.359		253.255		270.416		293.506		344.989	328.764	313.891		330.428		337.916		341.765		352.685		387.111		348.941		349.149		346.653		342.701		352.165		346.133		360.798		350.397		373.798
39	38.6903	55.9554	54.1873	62.2997	72.2843	78.2127	136.872	180.867		235.886		247.951		268.128	254.607	284.353	275.617	258.56	287.681			368.286			347.797					365.27					365.166					351.957					340.1
40	23.713	33.594		132.92	166.618		217.165	192.828	213.005		220.181		212.485		248.055		272.496		296.002		297.978		328.14		312.123	327.204	334.276		334.796		322.731		317.531		320.547		318.675		324.812		303.282		311.811		305.778		314.099		314.515
41	49.195	65.5239		75.8206				186.483		235.158			409.681							443.275						498.606				433.602					502.038					494.446					475.413
42	59.3876					169.53		213.941		234.222			280.505			286.953			297.354			351.957			313.579					380.247					399.904					451.803					507.134
Average	35.7633	59.7405	93.6982	115.101	145.241	183.302	216.017	255.257	284.841	317.685	330.786	386.154	355.386	396.677	389.433	431.338	437.887	463.5	452.289	474.568	465.03	521.886	499.607	574.609	494.8	513.843	511.859	603.52	531.931	474.483	541.639	558.063	566.101	601.715	554.595	529.478	600.656	632.843	617.283	558.04	594.654	603.947	633.72	565.101	601.934	607	616.003	624.095	641.865
	17.1499	20.5932	44.4132	59.4825	60.3465	97.8827	88.5483	85.3617	89.6931	100.116	107.143	130.133	112.703	118.702	130.503	123.992	150.618	136.642	156.898	161.45	154.455	152.985	163.929	141.513	183.998	155.973	193.709	148.906	205.058	122.565	199.352	202.893	191.487	126.396	179.835	204.708	213.382	124.643	242.26	111.749	229.79	83.0281	233.278	172.057	212.944	123.368	249.566	134.244	259.599
[truncated: 2 more columns]

## Sheet: Volume_FastSpreading
Cell\Time	1	2	3	4	5	6	7	8	9	10	11	12	13	14	15	16	17	18	19	20	21	22	23	24	25	26	27	28	29	30	31	32	33	34	35	36	37	38	39	40	41	42	43	44	45	46	47	48	49
1	3239.04	3196.66	3159.13	3148.1	3131.34	3111.64	3102.92	3067.38	3053.88	3039.57	3006.46	2991.31	2996.89	2972.07	2961.07	2955.6	2949.61	2940.9	2952.03	2947.7	2939.85	2943.23	2935.71	2938.94	2929.77	2913.67	2906.38	2902.21	2892.19	2881.85	2873.85	2865.97	2854.49	2858.88	2850.52	2825.96	2822.13	2818.07	2802.14	2794.55	2783.21	2785.06	2791.98	2780.74	2781.09	2775.57	2779.47	2766.66	2751.85
2	3142.55	3125.77	3103.03	3078.37	3038.29	3012.28	2974.7	2940.18	2904.25	2872.97	2832.52	2812.41	2776.56	2755.72	2726.6	2707.34	2702.42	2696.06	2692.02	2690.61	2689.27	2682.99	2690.48	2689.7	2694.25	2703.81	2715.22	2719.29	2733.14	2737.67	2749.83	2761	2776.57	2773.91	2778.83	2784.86	2794.61	2789.49	2797.03	2805.26	2816.62	2808.53	2811.87	2805.81	2816.22	2813.48	2800.61	2819.61	2814.54
3	1760.27	1745.88	1730.47	1716.83	1692.18	1664.25	1663.14	1660.61	1661.54	1652.84	1659.08	1658.65	1669.18	1673.84	1677.65	1675.81	1686.23	1685	1683.84	1690.56	1695.54	1692.4	1693.45	1702.98	1693.43	1690.62	1688.29	1698.45	1694.28	1712.58	1700.94	1701.75	1706.75	1706.54	1713.31	1708.79	1720.56	1708.79	1710.67	1716.84	1709.01	1702.33	1722.52	1730.1	1723.71	1726.36	1721.47	1735.22	1723.49
4	2172.12	2145.91	2121.28	2076.07	2052.31	2026.02	2007.75	1974.52	1970.37	1950.45	1935.98	1927.58	1927.19	1907.17	1912.05	1925.39	1914.87	1928.05	1918.13	1914.5	1924.14	1923.32	1927.97	1920.53	1932.92	1939.47	1937.74	1934.48	1945.49	1939.99	1945.35	1943.34	1945.84	1959.83	1958.74	1940.98	1962.04	1955.92	1951	1962.52	1968.65	1965.55	1962.75	1964.76	1977.42	1985.8	1981.98	1983.53	1976.34
5	2421.8	2402.64	2405.98	2397.06	2403.43	2386.5	2377.47	2378.37	2377.55	2368.07	2371.44	2364.12	2343.28	2338.4	2335.85	2340.44	2324.88	2323.5	2321.54	2311.1	2300.53	2302.2	2301.14	2296.92	2295.97	2289.19	2296.6	2298.9	2310.18	2297.7	2294.52	2294.1	2289.51	2289.95	2294.27	2286.4	2291.29	2296.12	2297.68	2295.94	2291.3	2291.09	2279.96	2275.2	2280.53	2279.61	2260.72	2248.35	2252.78
6	1419.82	1421.46	1417.29	1406.76	1391.95	1373.99	1357.74	1340.32	1325.76	1332.78	1332.03	1333.39	1327.26	1337.54	1327.37	1330.55	1334.86	1343.29	1343.61	1347.81	1359.61	1352.65	1360.08	1365.64	1366.65	1378.49	1370.68	1367.86	1362.72	1371.81	1372.44	1378.92	1379.35	1386.98	1389.2	1405.57	1402.64	1403.92	1407.24	1420.98	1404.78	1403.63	1423.49	1406.75	1424.05	1414.07	1423.37	1414.61	1426.23
7	1846.46	1852.3	1842.8	1837.63	1837.28	1829.21	1810.3	1803.06	1788.17	1772.5	1761.65	1757.83	1755.3	1754.88	1739.76	1733.14	1739.54	1733.04	1727.04	1729.26	1725.74	1736.47	1733.96	1726.48	1725.17	1733.4	1716.43	1713.12	1714.12	1708.36	1713.2	1711.89	1715.98	1710.39	1703.93	1705.62	1710.5	1710.66	1707.07	1712.84	1704.11	1712.97	1715.51	1705.29	1713.16	1705.34	1697.67	1698.04	1707.07
8	1604.19	1582.2	1581.25	1586.75	1591.09	1599.28	1591.68	1581.46	1569.88	1560.88	1552.49	1536.45	1516.64	1507.96	1494.99	1497.43	1489.66	1481.28	1473.74	1473.35	1474.01	1468.99	1469.01	1469.53	1463.44	1466.41	1468.68	1458.62	1464.63	1475.78	1476.5	1469.98	1468.98	1468.49	1471.22	1471.47	1472.78	1469.38	1471.19	1473.71	1469.02	1477.88	1477.27	1475.38	1468.84	1479.48	1473.74	1479.6	1480.33
9	2168.06	2156.78	2143.46	2139.9	2120.11	2100.16	2082.97	2061.23	2049.47	2033.25	2018.14	2010	1996.37	1990.46	1981.01	1974.84	1968.26	1966.25	1962.59	1960.52	1949.8	1954.97	1958.16	1958.19	1966.44	1968.62	1965.73	1974.09	1974.4	1972.71	1989.25	2001.68	1998.29	2006.81	2008.49	2017.26	2024.19	2026.93	2035.58	2038.31	2048.96	2042.85	2055.06	2059.73	2063.8	2063.93	2072.7	2064.14	2077.86
10	1466.31	1450.01	1439.01	1418.79	1404.44	1379.59	1366.33	1354.99	1353.54	1350.56	1347.67	1353.43	1356.75	1358.26	1362.88	1372.34	1372.29	1376.66	1386.11	1379.42	1405.15	1407.4	1396.31	1401.48	1396.6	1398.41	1410.23	1406.6	1410.92	1413.12	1415.53	1412.08	1414.21	1408.3	1415.97	1415.46	1418.44	1407.14	1412.36	1411.27	1398.16	1400.83	1413.17	1402.33	1413.79	1409.72	1413.52	1407.22	1408.88
11	2476.01	2464.98	2455.1	2452.23	2438.72	2444.48	2447.02	2430.57	2437.67	2431.15	2405.81	2393.05	2373.27	2362.87	2359.97	2357.25	2337.61	2341.57	2337.86	2330.99	2324.69	2310.09	2235.71	2165.8	2133.69	2123.05	2120.25	2094.43	2100.75	2103.88	2098.05	2106.76	2112.79	2116.55	2128.6	2143.8	2176.91	2196.19	2214.88	2239.51	2254.98	2278.61	2286.1	2292.12	2313.88	2319.76	2322.03	2337.16	2338.7
12	1837.37	1829.97	1840.07	1838.41	1853.25	1862.25	1853.78	1851.89	1849.44	1847.22	1850.99	1857.86	1856.11	1828.88	1797.51	1792.48	1789.43	1783.97	1772.67	1755.2	1743.77	1736.55	1723.4	1710.8	1708.37	1695	1690.74	1690.78	1690.43	1681.06	1697.92	1698.73	1707.75	1711.76	1717.92	1699.63	1703.93	1700.85	1692.86	1701.42	1703.71	1704.56	1705.32	1706.67	1712.21	1705.11	1711.91	1710.95	1705.2
13	1683.16	1678.03	1684.67	1701.18	1702.96	1694.85	1680.06	1678.75	1672.93	1667.71	1638.92	1632.36	1614.84	1601.12	1589.5	1577.66	1569.3	1558.17	1553.87	1545.22	1546.99	1544.79	1542.11	1545.06	1547.69	1543.75	1553.14	1542.06	1556.63	1559.34	1557.03	1559.7	1564.18	1560.27	1570.59	1570.81	1573.75	1579.18	1574.82	1579.24	1577.36	1583.62	1578.22	1576.02	1576.34	1582.87	1572.23	1578.19	1582.5
14	1788.09	1793.35	1804.66	1793.98	1791.39	1776.67	1767.09	1756.02	1739.68	1728.97	1713.47	1703.87	1685.82	1675.26	1674.61	1667.16	1657.53	1656.57	1645.66	1639.29	1637.1	1631.2	1626.38	1622.87	1618.33	1626.12	1624.68	1623.13	1618.83	1622.71	1625.83	1624.73	1625.48	1626.87	1638.66	1639.35	1634.66	1643.59	1637.85	1640.59	1652.46	1646.23	1654.92	1654.55	1652.37	1652.16	1643.04	1648.54	1654.31
15	1438.7	1437.78	1447.15	1483.66	1482.06	1475.85	1473.41	1461.39	1447.23	1435	1418.36	1404.69	1383.42	1373.5	1370.38	1366.69	1365.97	1365.21	1373.92	1372.74	1378.21	1390.9	1391.88	1399.74	1395.65	1411.13	1417.42	1418.89	1425.46	1426.05	1438.9	1435.71	1438.62	1449.04	1461.02	1460.01	1465.74	1466.05	1476.34	1470.76	1476.6	1473.35	1480.38	1474.25	1483.52	1474.81	1478.7	1485.52	1490.97
16	2074.81	2070.49	2047.9	2030.13	2015.9	2009.1	1992.11	1987.98	1980.83	1970.51	1957.4	1952.72	1938.98	1916.84	1907.51	1898.77	1892.04	1880.26	1871.06	1873.9	1854.04	1865.63	1861.26	1864.59	1860.69	1865.36	1862.75	1860.54	1860.2	1867.28	1861.16	1857.88	1860.26	1864.77	1865.22	1859.5	1870.9	1878.28	1869.98	1873.62	1872.09	1875.92	1869.67	1881.19	1882.18	1884.99	1892.75	1906.02	1910.48
17	1983.87	1971.02	1966.32	1957.98	1954.43	1950.6	1924.93	1925.3	1906.95	1906.01	1898.03	1874.04	1869.22	1856.03	1864.86	1853.99	1848.38	1837.97	1842.23	1842.96	1839.51	1831.65	1840	1840.07	1844.34	1841.9	1844.08	1851.47	1857.93	1855.44	1861.63	1870.92	1881.06	1864.35	1885.81	1886.96	1895.77	1897.6	1898.63	1896.47	1912.13	1913.53	1924.2	1932.12	1933.06	1931	1945.96	1948.17	1958.75
18	1898.06	1887.51	1871.36	1850.28	1835.4	1808.58	1802.68	1796.39	1770.91	1752.7	1742.66	1744.08	1734.85	1731.45	1729.53	1715.28	1719.27	1741.44	1741.9	1743.9	1743.26	1754.68	1771.72	1781.89	1794.99	1798.03	1801.25	1810.27	1774.43	1816.22	1828.18	1824.65	1843.69	1836.25	1840.48	1851.99	1834.05	1855.64	1866.83	1869.81	1878.32	1878.9	1888.81	1884.52	1884.49	1893.58	1886.4	1877.96	1881.06
19	1525.04	1516.16	1492.13	1475.5	1467.54	1456.02	1457.77	1436.22	1438.81	1427.15	1424.61	1425.64	1426.01	1425.45	1422.41	1421.64	1422.82	1426.6	1423.98	1426.17	1436.46	1440.97	1439.24	1447.36	1441.47	1444.85	1445.47	1457.51	1450.86	1455.45	1464.06	1463.28	1472.35	1476.24	1476.74	1476.72	1479.21	1485.34	1490.07	1488.79	1489.3	1494.41	1498.37	1504.88	1498.94	1499.26	1494.39	1499.48	1499.9
20	2463.14	2422.24	2414.32	2397.42	2380.99	2357.12	2342.43	2327.23	2321.01	2306.55	2288.97	2282.34	2267.74	2264.88	2242.18	2232.88	2215.32	2213.7	2203.28	2204.65	2197.5	2186.44	2185.06	2180.6	2189.79	2190.54	2183.46	2188.71	2192.19	2193.97	2198.93	2198.36	2207.83	2211.56	2214.9	2214.82	2222.4	2222.73	2223.45	2221.32	2229.22	2230.85	2221.38	2217.14	2219.86	2220.04	2221.24	2220.93	2215.89
21	2455.49	2469.69	2481.16	2475.73	2480.66	2450.45	2458.65	2431.73	2428.76	2420.4	2403.76	2381.87	2364.72	2342.28	2313.5	2293.05	2285.23	2258.35	2257.35	2232.84	2225.01	2207.13	2219.54	2213.83	2221.03	2204.04	2203.25	2186.89	2198.9	2199.59	2197.82	2193.94	2198.65	2186.33	2187.12	2174.57	2169.9	2182.35	2188.69	2179.96	2186.28	2171.81	2184.36	2176.88	2174.35	2179.87	2183.23	2189.72	2192.42
22	2600.4	2573.03	2552.31	2534.02	2521.51	2515.45	2506.8	2500.57	2498.92	2496.94	2490.5	2493.65	2506.58	2496.14	2500.76	2492.99	2482.33	2463.46	2452.24	2443.52	2431.94	2424.39	2407.73	2404.99	2390.66	2388.7	2382.74	2369.25	2366.34	2364.29	2357.41	2360.46	2361.46	2350.38	2354.96	2352.15	2350.5	2335.78	2329.26	2333.34	2335.95	2327.92	2325.51	2329.98	2337.65	2338.54	2332.83	2324.73	2329.42
23	1663.21	1637.32	1649.98	1644.55	1634.4	1625.92	1613.44	1595.48	1584.98	1568.39	1550.05	1542.38	1543.68	1530.45	1520.21	1515.52	1499.28	1496.83	1490.17	1481.3	1488.48	1479.79	1474.69	1475.02	1472.43	1458.01	1460.94	1456.68	1462.04	1464.2	1461.79	1455.35	1450.08	1449.76	1456.42	1444.54	1451.86	1451.43	1453.77	1451.59	1447.73	1447.03	1453	1450.64	1453.89	1454.17	1449.05	1449.83	1458.39
24	2197.61	2187.05	2153.97	2134.27	2102.81	2091.35	2076.77	2058.71	2056.66	2041.26	2037.68	2024.17	2051.3	2015.73	2019.31	2010.92	2008.5	2027.62	1974.21	2010.54	2041.89	1994.93	1992.61	1993.28	2000.49	2024.62	2037.39	2044.86	2028.94	2048.23	2050.35	2055.07	2018.54	2018.17	2062.11	2061.92	2061.08	2064.36	2066.89	2043.65	2043.47	2043.98	2081.37	2086.85	2053.49	2089.52	2098.57	2119.42	2114.3
25	1554.35	1558.04	1541.3	1535.67	1515.8	1510.03	1481.25	1463.83	1455.72	1436.04	1429.81	1422.09	1424.48	1419.3	1415.48	1416.54	1414.16	1411.47	1403.15	1410.23	1411.3	1418.48	1417.2	1422.1	1415.98	1413.84	1434.52	1390.88	1388.17	1394.2	1392.4	1401.11	1398.64	1399.77	1406.52	1409.89	1403.15	1409.15	1408.99	1406.76	1401.15	1409.56	1408.25	1409.52	1417.04	1418.91	1420.12	1410.64	1421.9
26	2034.93	2009.51	1996.88	1983.49	1959.32	1942.56	1926.65	1915.69	1901.87	1890.72	1880.8	1849.2	1837.94	1829.42	1835.16	1826.04	1807.48	1807.9	1797.91	1791.46	1784.13	1794.7	1777.76	1770.97	1780.64	1769.53	1771	1770.16	1788.83	1773.84	1778.87	1791.89	1797.94	1811.08	1807.49	1822.46	1806.7	1814.07	1833.73	1838.74	1844.14	1855.14	1868.7	1878.98	1887.28	1905.48	1909.11	1922.4	1943.99
27	1557.67	1555.38	1531.98	1517.86	1496.9	1482.02	1466.16	1453.32	1431.22	1426.23	1418.65	1403.98	1416.46	1405.33	1405.88	1405.86	1405.06	1397.15	1404.76	1410.27	1417.17	1418.45	1408.98	1417.49	1424.74	1428.26	1425.71	1430.87	1427.23	1438.1	1435.28	1434.16	1430.98	1441.12	1433.35	1447.32	1442.21	1449.79	1450.64	1451.69	1449.52	1450.43	1445.57	1452.77	1450.2	1460.89	1460.4	1460.77	1459.69
28	1667.99	1644.8	1619.37	1591.53	1584.03	1568.83	1546.36	1544.47	1529.71	1532.29	1535.62	1529.09	1529.09	1545.35	1536.83	1533.25	1537.93	1551.18	1556.94	1559.85	1561.14	1559.44	1562.46	1561.47	1566.42	1569.12	1569.47	1584.5	1582.1	1565.25	1585.42	1580.02	1582.42	1569.97	1570.59	1566.79	1571.48	1569.17	1578.06	1577.84	1576.4	1566.22	1571.45	1583.62	1568.38	1582.94	1583.31	1577.39	1578.91
29	1490.27	1490.88	1480.46	1474.58	1479.1	1482.87	1479.48	1480.95	1480.61	1473.27	1474.44	1467.01	1479.84	1478.69	1487.94	1490.13	1497.78	1497.61	1500.84	1500.9	1511.65	1502.02	1510.82	1507.78	1508.71	1502.41	1512.39	1499.2	1504.71	1510.87	1489.27	1497.17	1498.73	1489.43	1500.52	1503.26	1506.39	1491.15	1500.86	1499.45	1507.37	1502.32	1508.47	1501.01	1493.11	1491.47	1488.53	1492.48	1495.35
30	1072.46	1066.84	1064.39	1056.95	1038.53	1022.38	1017.45	998.688	992.463	991.286	977.829	978.664	976.246	981.641	990.411	996.683	995.494	1001.09	1012.74	1011.68	1010.62	1007.41	1022.33	1017.86	1022.71	1016.05	1026.77	1037.96	1035.94	1039.08	1038.95	1048.89	1043.14	1050.8	1047.53	1050.82	1055.47	1054.37	1059.48	1054.81	1049.59	1063.96	1055.09	1051.19	1056.93	1061.47	1068.83	1055.19	1053.33
31	1398.77	1387	1396.59	1390.56	1391.68	1388.15	1380.45	1370.27	1358.49	1352.17	1338.07	1340.89	1329.73	1331.13	1328.69	1318.54	1318.67	1311.31	1314.16	1308.02	1312.26	1313.22	1317.26	1318.7	1322.92	1317.03	1326.43	1325.98	1328.86	1342.85	1331.02	1339.58	1340.07	1344.41	1352.14	1349.5	1353.97	1364.2	1356.35	1374.41	1377.45	1383.47	1387.68	1394.01	1391.5	1404.92	1407.83	1409.91	1410.8
32	2588.39	2595.32	2596.02	2598.57	2591.33	2605.71	2592.64	2590.99	2582.8	2590.01	2576.94	2579.33	2571.14	2571.57	2568.16	2565.66	2559.83	2555.83	2535.74	2530.99	2532.54	2535.39	2527.16	2535.78	2526.06	2538	2539.21	2539.95	2551.91	2546.67	2549.77	2551.4	2539.69	2544.88	2532.83	2541.79	2546.54	2549.6	2552.63	2545.78	2561.95	2567.81	2567.34	2569.34	2564.89	2568.07	2574.05	2559.93	2562.5
33	1991.15	2004.03	2038.88	2049.65	2062.57	2057.89	2074.57	2062.68	2042.07	2030.81	2001.68	2001.39	1979.37	1964.82	1955.88	1936.65	1930.48	1910.72	1902.53	1888.37	1876.99	1872.3	1869.3	1860.4	1860.92	1864.85	1858.06	1862.87	1863.93	1867.98	1873.55	1872.99	1866.64	1874.85	1871.54	1872.85	1867.19	1880.58	1878.98	1881.92	1875.08	1879.92	1875.53	1884.52	1885.47	1880.82	1885.78	1886.65	1875.43
34	2086.97	2088.87	2077.39	2082.96	2079.69	2099.47	2088.13	2075.58	2066.31	2062.77	2045.2	2045.24	2031.59	2016.27	1988.81	1957.05	1958.99	1941.7	1929.07	1921.22	1913.43	1897.63	1896.1	1895.69	1890.84	1894.81	1892.92	1898.17	1896.78	1890.87	1888.25	1901.16	1895.6	1902.82	1902.07	1903.71	1912.92	1903.06	1907.44	1912.2	1904.07	1912.57	1915.53	1915.89	1920.36	1918.59	1922.82	1917.97	1931.64
35	2277.84	2259.94	2252.54	2238.57	2214.63	2195.73	2171.43	2180.35	2155.1	2148.69	2146.04	2129.35	2114.48	2106.6	2100.69	2094.89	2081.42	2060.51	2050.83	2037.65	2027.99	2019.21	2015.92	2000.26	1986.86	1983.09	1976.93	1973.36	1970.22	1976.68	1983.01	1975.27	1976.93	1987.81	1982.5	1989.04	1990.82	1995.8	1986.74	1981.57	1993.38	1999.43	1997.49	1989.25	1997.53	1998.66	1991.45	2009.41	2007.15
36	2593.04	2626.21	2660.47	2689	2717.28	2719.46	2751.32	2753.36	2746.51	2765.02	2756.59	2752.97	2756.66	2736.34	2745.8	2720.56	2710.01	2697.19	2689.2	2660.72	2664.02	2641.94	2642.44	2632.97	2624.12	2627.15	2616.46	2622.62	2631.55	2623.98	2620.19	2614.43	2623.09	2609.81	2610.86	2605.05	2620.12	2610.11	2614.71	2620.54	2624.42	2631.64	2623.4	2615.12	2619.35	2612.29	2624.39	2628.93	2629
37	1947.76	1908.23	1902.48	1886.14	1877.67	1867.95	1861.93	1852.83	1857.81	1822.86	1819.11	1805.42	1793.89	1787.25	1782.87	1783.08	1765.49	1771.67	1765.57	1763.06	1750.52	1757.66	1752.89	1749.15	1745.42	1746.53	1755.71	1756.76	1751.57	1759.34	1763.61	1767.32	1771.22	1784.52	1787.58	1780.31	1779.18	1803.21	1797.45	1803.99	1809.02	1816.77	1819.04	1823.84	1818.26	1818.41	1824.81	1821.59	1835.16
38	1493.38	1453.35	1410.46	1368.11	1316.98	1288.38	1255.47	1237.9	1227.73	1206.92	1189.39	1170.65	1157.59	1143.47	1149.05	1141.14	1136.07	1128.31	1128.95	1124.69	1125.66	1132.72	1130.76	1133.29	1132.35	1135.67	1137.33	1147.08	1155.34	1154.28	1154.17	1163.94	1173.13	1175.14	1181.41	1186.31	1195.05	1198.48	1212.46	1208.49	1213.31	1215.13	1224.1	1237.35	1247.49	1242.73	1252.16	1254.68	1268.07
39	1489.46	1480.18	1466.1	1446.84	1441.77	1420.55	1406.06	1382.73	1360.56	1344.09	1339.77	1335.68	1332.51	1321.54	1319.36	1333.28	1317.47	1328.17	1324.38	1322.08	1315.57	1316.37	1321.92	1320.75	1318.43	1330.05	1331.64	1341.92	1348.08	1343.9	1357.75	1356.34	1370.6	1374.97	1385.72	1387.56	1396.96	1395.72	1397.12	1407.29	1414.68	1409.85	1410.28	1406.84	1405.71	1408.03	1411.72	1403.58	1405.01
40	1299.77	1305.13	1303.83	1300.96	1290.93	1286.07	1285.31	1271.86	1261.33	1250.06	1251.07	1242.94	1240.26	1237.2	1226.71	1221.33	1213.38	1216.13	1211.38	1203.26	1210.11	1204.69	1202.91	1202.8	1205.28	1194.86	1198.66	1198.03	1205.32	1203.04	1204.37	1206.07	1200.31	1204.92	1212.07	1207.8	1211.05	1222.71	1223.16	1224.82	1240.85	1239.44	1236.97	1235.96	1237.24	1241.06	1237.16	1238.73	1238.81
41	2523.85	2522.29	2525.58	2522.41	2517.75	2514.14	2508.03	2508.37	2514.88	2505.53	2502.69	2520.1	2515.32	2517.27	2521.03	2527.6	2516.53	2517.22	2514.3	2513.68	2510.53	2514.57	2517.44	2526.13	2533.56	2548.58	2534.37	2546.01	2556.45	2552.63	2566.83	2571.41	2568.65	2582.98	2577.88	2584.84	2609.09	2601.59	2602.21	2613.26	2603	2619.73	2626.57	2626.28	2623.66	2639.91	2632.13	2644.23	2641.87
42	2242.96	2219.49	2215.8	2224.28	2217.99	2213.78	2196.57	2256.95	2283.09	2251.28	2256.2	2278.56	2253.52	2274.68	2267.07	2263.93	2254.58	2257.99	2256.39	2251.81	2242.69	2248.6	2236.85	2224.57	2215.73	2216.64	2204.7	2201.99	2204.96	2200.19	2194.53	2189.88	2183.77	2187.52	2185.89	2178.29	2184.17	2183.7	2171.07	2163.61	2168.56	2161.96	2170.05	2156.24	2143.66	2141.75	2135.76	2143.04	2141.71
Average	1967.54	1956.99	1949.65	1941.28	1931.39	1920.66	1910.03	1900.03	1891.37	1881.28	1870.92	1864.53	1857.67	1849.64	1844.22	1839.08	1833.25	1830.69	1826.19	1822.81	1822.16	1819.49	1816.86	1814.63	1813.48	1814.14	1814.66	1814.22	1816.14	1817.93	1819.95	1821.65	1822.72	1824.5	1828.42	1828.26	1832.44	1834.34	1835.91	1837.84	1839.7	1841.59	1845.64	1845.37	1846.83	1849.42	1849.71	1851.22	1853.62
1	100	98.6915	97.5328	97.1925	96.6749	96.0666	95.7976	94.7002	94.2836	93.8417	92.8196	92.3516	92.5239	91.7579	91.4181	91.2492	91.0643	90.7954	91.1391	91.0054	90.7629	90.8674	90.635	90.7349	90.4519	89.9547	89.7297	89.6008	89.2917	88.9723	88.7253	88.4822	88.1275	88.2631	88.005	87.247	87.1285	87.0032	86.5113	86.2771	85.9268	85.984	86.1977	85.8508	85.8616	85.691	85.8114	85.416	84.9589
2	100	99.4659	98.7424	97.9577	96.6824	95.8546	94.6587	93.5603	92.417	91.4216	90.1345	89.4945	88.3538	87.6906	86.7639	86.1511	85.9946	85.7922	85.6635	85.6186	85.5761	85.3761	85.6144	85.5898	85.7344	86.0388	86.4018	86.5315	86.9722	87.1163	87.5031	87.8587	88.354	88.2695	88.4259	88.618	88.9281	88.7652	89.0051	89.2669	89.6285	89.3712	89.4772	89.2845	89.6159	89.5286	89.1191	89.7237	89.5622
3	100	99.1823	98.3069	97.532	96.1317	94.5447	94.4816	94.338	94.3908	93.8967	94.2513	94.2267	94.8251	95.0896	95.3062	95.2014	95.7937	95.7235	95.6576	96.0398	96.3228	96.1441	96.2037	96.7451	96.2028	96.0429	95.9105	96.488	96.2508	97.2902	96.6294	96.6753	96.9593	96.9475	97.3319	97.0753	97.7438	97.0752	97.1818	97.5324	97.0876	96.7081	97.8554	98.286	97.9226	98.0733	97.7954	98.5768	97.9101
4	100	98.7934	97.6595	95.5781	94.4844	93.2742	92.433	90.9032	90.7118	89.7948	89.1288	88.7419	88.7242	87.8025	88.0272	88.6414	88.1568	88.7636	88.3069	88.1396	88.5838	88.5458	88.7601	88.4174	88.9877	89.2895	89.2097	89.0596	89.5663	89.3132	89.5599	89.4677	89.5828	90.2267	90.1767	89.359	90.3283	90.0466	89.8202	90.3506	90.6326	90.4901	90.361	90.4536	91.0364	91.4223	91.2466	91.3179	90.9867
5	100	99.2091	99.3467	98.9785	99.2416	98.5427	98.1698	98.2068	98.1731	97.7814	97.9206	97.6186	96.7579	96.5562	96.4512	96.6406	95.9983	95.9412	95.8603	95.4293	94.9925	95.0615	95.018	94.8436	94.8042	94.5245	94.8305	94.9255	95.3913	94.8757	94.7445	94.7273	94.5378	94.5559	94.7342	94.4094	94.611	94.8106	94.8749	94.8032	94.6116	94.6028	94.1433	93.9467	94.1669	94.1288	93.3489	92.8382	93.0212
6	100	100.116	99.8219	99.0804	98.0376	96.772	95.6281	94.4011	93.3752	93.8697	93.8173	93.9129	93.4813	94.2055	93.4886	93.7125	94.0164	94.6101	94.633	94.9283	95.7596	95.2695	95.7924	96.1841	96.2556	97.0892	96.5392	96.3407	95.9786	96.6187	96.6631	97.1195	97.1497	97.6874	97.8434	98.9963	98.7899	98.8802	99.1139	100.082	98.9409	98.8599	100.258	99.0797	100.298	99.5953	100.25	99.6334	100.451
7	100	100.316	99.8019	99.522	99.5027	99.0656	98.0414	97.6497	96.843	95.9946	95.407	95.2001	95.063	95.0404	94.2211	93.8628	94.2092	93.8573	93.5324	93.6528	93.4618	94.0432	93.9072	93.5022	93.4311	93.8767	92.9576	92.7785	92.8328	92.521	92.7828	92.7118	92.9334	92.6305	92.2808	92.3722	92.6366	92.6454	92.451	92.7632	92.2904	92.7706	92.908	92.3547	92.781	92.3572	91.9421	91.962	92.451
8	100	98.6294	98.5699	98.913	99.1837	99.694	99.2202	98.5834	97.8611	97.3002	96.7774	95.7772	94.5424	94.0017	93.1928	93.3452	92.861	92.3381	91.8685	91.8442	91.885	91.5724	91.5735	91.6058	91.2264	91.4115	91.5527	90.926	91.3001	91.9954	92.0405	91.6342	91.5716	91.5408	91.7112	91.7269	91.8082	91.5962	91.7094	91.8663	91.5741	92.1264	92.0885	91.9705	91.5628	92.2261	91.8681	92.2336	92.2788
9	100	99.4797	98.8652	98.701	97.7883	96.8678	96.0751	95.0724	94.53	93.7818	93.0847	92.7094	92.0806	91.8082	91.3725	91.0875	90.7841	90.6917	90.5229	90.4272	89.9327	90.171	90.3184	90.3199	90.7004	90.8009	90.6675	91.0533	91.0676	90.9893	91.7525	92.3257	92.1694	92.5624	92.6399	93.0443	93.364	93.4902	93.8894	94.0153	94.5062	94.2245	94.7877	95.0032	95.1908	95.1971	95.6014	95.2067	95.8394
10	100	98.8887	98.1379	96.7594	95.7806	94.086	93.1818	92.4083	92.3094	92.1063	91.909	92.3019	92.5282	92.6314	92.9462	93.5915	93.5881	93.8863	94.5304	94.0744	95.8292	95.9827	95.226	95.5789	95.2462	95.3697	96.1753	95.9282	96.2228	96.3725	96.5367	96.3019	96.4471	96.044	96.5672	96.5319	96.7356	95.9645	96.3209	96.2464	95.3525	95.5341	96.3758	95.6366	96.4179	96.141	96.3996	95.9701	96.0832
11	100	99.5543	99.1553	99.0395	98.494	98.7263	98.8292	98.1647	98.4516	98.1882	97.1647	96.6494	95.8504	95.4304	95.3135	95.2034	94.4101	94.57	94.4204	94.1427	93.8883	93.2987	90.2947	87.4714	86.1745	85.7448	85.6317	84.5888	84.844	84.9705	84.7351	85.0867	85.3304	85.4823	85.9687	86.5827	87.9198	88.6985	89.4533	90.4484	91.0731	92.0276	92.3298	92.5732	93.4517	93.6893	93.781	94.3921	94.4544
12	100	99.5973	100.147	100.057	100.864	101.354	100.893	100.79	100.657	100.536	100.741	101.115	101.02	99.5383	97.8305	97.5568	97.391	97.0936	96.4787	95.528	94.9061	94.5128	93.7971	93.1112	92.9793	92.2514	92.0195	92.0219	92.0025	91.4927	92.4103	92.4546	92.9457	93.1636	93.499	92.5034	92.7377	92.5701	92.135	92.6012	92.7258	92.7719	92.8133	92.8867	93.1882	92.8016	93.1719	93.1196	92.8066
13	100	99.6955	100.09	101.071	101.177	100.695	99.8158	99.7379	99.3922	99.0823	97.3718	96.9818	95.941	95.1259	94.4356	93.7321	93.2355	92.5744	92.3185	91.8045	91.9096	91.7791	91.6202	91.7953	91.9515	91.7172	92.2755	91.6169	92.4827	92.6435	92.5062	92.6652	92.9309	92.6991	93.3119	93.325	93.4997	93.8222	93.5635	93.8259	93.7143	94.0864	93.7651	93.6344	93.6539	94.0414	93.4095	93.7638	94.0197
14	100	100.294	100.926	100.329	100.184	99.3613	98.8251	98.2064	97.2926	96.6933	95.8264	95.2898	94.2802	93.6897	93.6535	93.237	92.6982	92.6444	92.0345	91.6784	91.5555	91.2257	90.956	90.7601	90.5059	90.9417	90.8611	90.7745	90.5338	90.7508	90.9253	90.8641	90.9058	90.9835	91.6429	91.6816	91.419	91.9186	91.5974	91.7511	92.4145	92.0661	92.5521	92.5315	92.4096	92.3977	91.888	92.1953	92.5181
15	100	99.9359	100.587	103.125	103.014	102.582	102.412	101.577	100.593	99.7427	98.5863	97.636	96.1575	95.4681	95.2511	94.9944	94.9443	94.8921	95.4971	95.4154	95.7954	96.6772	96.7458	97.2917	97.0075	98.0835	98.5206	98.623	99.0794	99.1205	100.014	99.792	99.9943	100.718	101.552	101.481	101.879	101.901	102.616	102.228	102.634	102.409	102.897	102.471	103.115	102.509	102.78	103.254	103.633
16	100	99.7919	98.7031	97.8464	97.1608	96.8332	96.014	95.815	95.4703	94.9732	94.3411	94.1157	93.4533	92.3861	91.9368	91.5154	91.1913	90.6234	90.1799	90.3168	89.3594	89.9183	89.7075	89.8683	89.6801	89.9049	89.7796	89.673	89.6562	89.9975	89.7029	89.5446	89.6594	89.8767	89.8983	89.6225	90.1723	90.5278	90.1278	90.3032	90.2296	90.4139	90.113	90.6682	90.7156	90.8515	91.2252	91.8646	92.0799
17	100	99.3524	99.1154	98.6949	98.5162	98.3231	97.0288	97.0477	96.1226	96.0756	95.673	94.4641	94.221	93.5559	94.0012	93.4531	93.1704	92.6454	92.8604	92.8973	92.7231	92.3272	92.7478	92.7515	92.9668	92.8437	92.9537	93.326	93.6519	93.5261	93.8381	94.3064	94.8176	93.9755	95.0572	95.1152	95.5593	95.6515	95.7032	95.5943	96.3837	96.4545	96.9924	97.3915	97.4389	97.335	98.0889	98.2006	98.7338
18	100	99.4442	98.5936	97.483	96.6987	95.2861	94.9753	94.6438	93.3015	92.3419	91.8127	91.8877	91.4016	91.2225	91.1214	90.3706	90.5807	91.7487	91.7727	91.8784	91.8444	92.4463	93.3441	93.8798	94.5701	94.7303	94.8999	95.3747	93.4867	95.6884	96.3188	96.1324	97.1358	96.7437	96.9665	97.5729	96.6276	97.7653	98.3549	98.5121	98.9601	98.9909	99.5127	99.2867	99.2853	99.7644	99.386	98.9413	99.1047
19	100	99.4174	97.8416	96.7516	96.2296	95.4742	95.5885	94.1755	94.3454	93.5811	93.4144	93.4818	93.5059	93.4692	93.27	93.2194	93.2967	93.545	93.3727	93.517	94.1912	94.487	94.3739	94.9063	94.5199	94.7417	94.782	95.5719	95.1356	95.4363	96.0012	95.9503	96.5445	96.7998	96.8325	96.8311	96.9949	97.3964	97.7064	97.6229	97.6561	97.9915	98.2509	98.6779	98.2883	98.3096	97.9897	98.3236	98.3515
20	100	98.3396	98.018	97.332	96.6648	95.6958	95.0995	94.4824	94.2297	93.6428	92.9288	92.6596	92.0672	91.9511	91.0293	90.652	89.9388	89.8731	89.45	89.5058	89.2154	88.7664	88.7105	88.5293	88.9023	88.9327	88.6454	88.8586	88.9999	89.0722	89.2736	89.2502	89.6348	89.7864	89.9219	89.9184	90.2264	90.2397	90.2689	90.1823	90.503	90.5695	90.1849	90.0126	90.1232	90.1305	90.1792	90.1666	89.9621
21	100	100.578	101.045	100.824	101.025	99.7944	100.128	99.032	98.9113	98.571	97.8929	97.0017	96.3033	95.3891	94.2173	93.3845	93.0659	91.9712	91.9305	90.9324	90.6135	89.8854	90.3909	90.1583	90.4513	89.7597	89.7272	89.061	89.5504	89.5782	89.5062	89.348	89.5401	89.0382	89.0704	88.5594	88.3691	88.8762	89.1343	88.779	89.0362	88.4467	88.958	88.6535	88.5504	88.7752	88.9118	89.1764	89.2865
22	100	98.9477	98.1508	97.4474	96.9662	96.7332	96.4005	96.1612	96.0975	96.0215	95.7738	95.8951	96.3923	95.9906	96.1685	95.8697	95.4598	94.7341	94.3027	93.9671	93.5217	93.2317	92.591	92.4854	91.9342	91.8592	91.6298	91.1112	90.999	90.9202	90.6558	90.773	90.8116	90.3853	90.5615	90.4536	90.3901	89.8241	89.5731	89.7301	89.8304	89.5217	89.4291	89.601	89.8959	89.93	89.7105	89.3989	89.5794
23	100	98.4433	99.2041	98.878	98.2674	97.7577	97.0074	95.9273	95.2962	94.2989	93.1959	92.735	92.8131	92.0174	91.4022	91.1199	90.1437	89.9965	89.5958	89.0624	89.4944	88.9719	88.6649	88.6847	88.5294	87.6625	87.8385	87.5822	87.9047	88.0346	87.8893	87.5023	87.1857	87.1662	87.5665	86.8523	87.2927	87.2664	87.4073	87.2761	87.0441	87.0023	87.3607	87.2192	87.4148	87.4313	87.1236	87.1701	87.6849
24	100	99.5194	98.0141	97.1176	95.686	95.1647	94.501	93.6792	93.5861	92.8855	92.7225	92.1077	93.3421	91.7238	91.8865	91.5048	91.3944	92.2646	89.8344	91.4873	92.9141	90.7773	90.6717	90.7023	91.0303	92.1281	92.7091	93.0492	92.3246	93.2024	93.2988	93.5136	91.8513	91.8346	93.834	93.8252	93.7874	93.9363	94.0516	92.9941	92.9859	93.009	94.7106	94.9599	93.4417	95.0813	95.4933	96.442	96.2091
25	100	100.237	99.1602	98.7976	97.5195	97.1483	95.2965	94.1764	93.6541	92.3882	91.9876	91.4904	91.6443	91.311	91.0654	91.1334	90.9806	90.8073	90.2722	90.728	90.7964	91.2587	91.1759	91.4913	91.0979	90.9598	92.2906	89.4831	89.3085	89.6967	89.5804	90.1408	89.9823	90.055	90.4891	90.7055	90.2725	90.6585	90.6476	90.5046	90.1434	90.6844	90.6006	90.6823	91.166	91.286	91.3639	90.7543	91.4785
26	100	98.751	98.1301	97.4723	96.2845	95.4608	94.6789	94.1406	93.4611	92.9132	92.4261	90.8732	90.3195	89.9008	90.1833	89.7348	88.823	88.8436	88.3523	88.0357	87.6751	88.1949	87.3625	87.0289	87.5036	86.9578	87.03	86.9888	87.9061	87.1698	87.4169	88.0564	88.3539	88.9995	88.8231	89.5591	88.7844	89.1468	90.113	90.3591	90.6245	91.1648	91.8312	92.3367	92.7445	93.6389	93.8173	94.4703	95.5311
27	100	99.8531	98.3505	97.4438	96.0986	95.1429	94.1247	93.3004	91.8817	91.5618	91.075	90.1333	90.9344	90.2198	90.2551	90.2536	90.2028	89.6943	90.1833	90.5366	90.9797	91.0623	90.4541	91.0001	91.4659	91.6921	91.5281	91.8592	91.6256	92.3239	92.1425	92.0709	91.8666	92.5174	92.0187	92.9157	92.5877	93.0742	93.1286	93.1959	93.057	93.1151	92.8031	93.2652	93.1004	93.7868	93.7553	93.7786	93.7098
28	100	98.6094	97.0851	95.4159	94.9661	94.055	92.7081	92.5945	91.7095	91.8644	92.0638	91.6728	91.6723	92.6475	92.1368	91.9217	92.2028	92.9968	93.3425	93.517	93.5938	93.4924	93.6733	93.6141	93.9107	94.0725	94.0934	94.9944	94.8506	93.8401	95.0494	94.726	94.87	94.1231	94.1605	93.9327	94.214	94.0757	94.6083	94.595	94.5087	93.8988	94.2119	94.9418	94.0281	94.9013	94.9231	94.5685	94.6592
29	100	100.041	99.3418	98.9474	99.2506	99.5036	99.2761	99.3743	99.3518	98.8593	98.938	98.4392	99.3004	99.2232	99.8435	99.9903	100.504	100.493	100.709	100.713	101.434	100.789	101.379	101.175	101.237	100.814	101.484	100.599	100.969	101.382	99.9328	100.463	100.568	99.9435	100.688	100.871	101.081	100.059	100.71	100.616	101.148	100.809	101.222	100.721	100.19	100.081	99.8836	100.148	100.341
30	100	99.4756	99.2472	98.5538	96.836	95.3302	94.8707	93.1209	92.5404	92.4307	91.1759	91.2538	91.0283	91.5314	92.3491	92.9339	92.8231	93.3451	94.4307	94.332	94.2335	93.9337	95.3255	94.9085	95.3604	94.7393	95.7393	96.7825	96.5945	96.8867	96.8754	97.8019	97.2653	97.9797	97.6753	97.9821	98.4157	98.3132	98.7895	98.3536	97.8668	99.2067	98.3802	98.0168	98.5515	98.9751	99.6615	98.389	98.2159
31	100	99.1582	99.8438	99.4132	99.4927	99.2407	98.6899	97.9625	97.1204	96.6686	95.6603	95.8622	95.0642	95.1641	94.9902	94.2645	94.2734	93.7471	93.9512	93.5121	93.8155	93.884	94.1728	94.2754	94.5777	94.1559	94.8283	94.7963	95.0021	96.002	95.1564	95.7682	95.8031	96.1135	96.666	96.4776	96.797	97.5285	96.9672	98.2586	98.476	98.9061	99.2074	99.6594	99.4802	100.44	100.647	100.796	100.86
32	100	100.268	100.295	100.393	100.113	100.669	100.164	100.1	99.7838	100.063	99.5577	99.6499	99.3334	99.3503	99.2182	99.1219	98.8965	98.7419	97.966	97.7824	97.8423	97.9524	97.6344	97.9675	97.5918	98.0533	98.0999	98.1284	98.5906	98.3881	98.5079	98.5708	98.1185	98.3191	97.8533	98.1997	98.3832	98.5012	98.6182	98.3536	98.9785	99.2048	99.1867	99.2638	99.0921	99.2148	99.4458	98.9002	98.9996
33	100	100.647	102.397	102.938	103.586	103.352	104.189	103.592	102.557	101.992	100.529	100.514	99.4081	98.6775	98.2286	97.2629	96.9528	95.9603	95.549	94.8379	94.2666	94.0311	93.88	93.4335	93.4591	93.6566	93.3159	93.5574	93.6104	93.8138	94.0938	94.0655	93.7466	94.1589	93.9928	94.0585	93.7741	94.4465	94.3664	94.5141	94.1704	94.4137	94.1931	94.6444	94.6922	94.459	94.708	94.7515	94.1882
34	100	100.091	99.5407	99.808	99.6509	100.599	100.056	99.4543	99.0101	98.8403	97.9983	98.0005	97.3465	96.6121	95.2966	93.7746	93.8677	93.0391	92.4337	92.0576	91.6844	90.9276	90.8542	90.8344	90.6019	90.7923	90.7017	90.9533	90.8866	90.6036	90.4778	91.0965	90.8301	91.1763	91.1403	91.2189	91.6602	91.1876	91.3975	91.6257	91.2358	91.6432	91.7853	91.8024	92.0164	91.9319	92.1347	91.9019	92.5569
35	100	99.2142	98.8893	98.2757	97.2249	96.3951	95.3285	95.7198	94.6113	94.33	94.2138	93.4811	92.8281	92.4824	92.2228	91.9681	91.377	90.4587	90.0339	89.4553	89.0311	88.6458	88.5013	87.8139	87.2257	87.06	86.7898	86.633	86.4951	86.7787	87.0565	86.7168	86.7894	87.2671	87.0342	87.3212	87.3993	87.618	87.22	86.9934	87.5118	87.7773	87.6923	87.3306	87.6938	87.7434	87.4268	88.2155	88.1164
36	100	101.279	102.601	103.701	104.791	104.876	106.104	106.183	105.919	106.633	106.307	106.168	106.31	105.527	105.891	104.918	104.511	104.017	103.709	102.61	102.737	101.886	101.905	101.54	101.199	101.316	100.903	101.141	101.485	101.193	101.047	100.825	101.159	100.647	100.687	100.463	101.044	100.658	100.836	101.061	101.21	101.489	101.171	100.852	101.015	100.743	101.209	101.384	101.387
37	100	97.9709	97.6755	96.8368	96.4019	95.9026	95.5935	95.1267	95.3821	93.5878	93.3954	92.6922	92.1005	91.7595	91.5348	91.5454	90.6421	90.9596	90.6464	90.5173	89.8738	90.2401	89.9955	89.8034	89.612	89.669	90.14	90.1939	89.9274	90.3266	90.5459	90.7363	90.9366	91.6192	91.7764	91.4033	91.3453	92.5787	92.2832	92.6189	92.8772	93.2753	93.3918	93.6379	93.3516	93.3591	93.6877	93.5224	94.2192
38	100	97.3195	94.4472	91.6114	88.1879	86.2723	84.0688	82.8921	82.2115	80.8181	79.644	78.3892	77.5149	76.569	76.9431	76.4134	76.0737	75.554	75.5971	75.3117	75.3769	75.849	75.7181	75.8873	75.8244	76.047	76.1581	76.8109	77.3639	77.2927	77.2856	77.94	78.5552	78.6896	79.1097	79.4381	80.0232	80.2529	81.1888	80.923	81.2456	81.3675	81.9685	82.8552	83.5345	83.2156	83.8472	84.0161	84.9127
39	100	99.3772	98.4315	97.1383	96.7983	95.3737	94.4008	92.8345	91.3456	90.2399	89.9502	89.6757	89.4627	88.7258	88.5799	89.514	88.4525	89.1712	88.917	88.7621	88.3255	88.379	88.7515	88.6731	88.5173	89.2976	89.4039	90.094	90.5082	90.2276	91.1572	91.0627	92.0198	92.3134	93.0348	93.1586	93.7895	93.7063	93.8002	94.4831	94.9795	94.6552	94.6839	94.453	94.3768	94.5327	94.7808	94.2339	94.3302
40	100	100.412	100.313	100.092	99.3197	98.9459	98.8874	97.8528	97.0426	96.176	96.2536	95.6279	95.4221	95.1865	94.3793	93.9655	93.3538	93.5652	93.2	92.575	93.102	92.6851	92.5478	92.5399	92.7307	91.9292	92.2211	92.1725	92.7332	92.5585	92.6607	92.7911	92.3482	92.7027	93.2527	92.9246	93.1742	94.0717	94.1064	94.2335	95.4669	95.3588	95.1684	95.0906	95.1894	95.4831	95.1829	95.3039	95.3103
41	100	99.9382	100.069	99.9429	99.7583	99.6151	99.3731	99.3867	99.6445	99.2741	99.1617	99.8512	99.6619	99.7392	99.8883	100.149	99.7097	99.7373	99.6217	99.5971	99.472	99.6322	99.7458	100.09	100.385	100.98	100.417	100.878	101.291	101.14	101.703	101.884	101.775	102.343	102.141	102.416	103.377	103.08	103.105	103.543	103.136	103.799	104.07	104.059	103.955	104.598	104.29	104.77	104.676
42	100	98.9537	98.7893	99.1674	98.8871	98.6993	97.932	100.624	101.79	100.371	100.591	101.587	100.471	101.414	101.075	100.935	100.518	100.67	100.599	100.395	99.9883	100.251	99.7276	99.1801	98.7861	98.8266	98.2944	98.1737	98.306	98.0932	97.8408	97.6339	97.3615	97.5285	97.456	97.117	97.3791	97.3583	96.7952	96.4624	96.683	96.389	96.7497	96.1339	95.5731	95.4878	95.2208	95.5454	95.486
	100	99.459	99.071	98.6228	98.0863	97.5031	96.9273	96.3738	95.8966	95.3675	94.8482	94.5171	94.1774	93.7996	93.5425	93.3118	93.037	92.9375	92.7447	92.585	92.6016	92.4865	92.3921	92.3137	92.2697	92.3028	92.3735	92.3596	92.4519	92.5766	92.6796	92.7818	92.8445	92.9495	93.1761	93.1873	93.3917	93.4997	93.6012	93.7082	93.7872	93.895	94.1105	94.0995	94.1804	94.3163	94.3454	94.3985	94.5463
	3.79801e-15	0.767315	1.39624	2.10593	2.73006	3.151	3.56904	3.84247	3.98269	4.17484	4.23749	4.45105	4.43802	4.51635	4.47185	4.43109	4.49876	4.47695	4.50946	4.44279	4.52477	4.45249	4.50515	4.58017	4.57739	4.64577	4.6381	4.70372	4.65435	4.71129	4.6844	4.65046	4.60608	4.5774	4.58769	4.63482	4.6504	4.5496	4.57877	4.62353	4.5918	4.6228	4.67485	4.57831	4.51295	4.53907	4.59026	4.57078	4.55304
[truncated: 2 more columns]

## Sheet: Area_NormalSpreading
Cell\Time	1	2	3	4	5	6	7	8	9	10	11	12	13	14	15	16	17	18	19	20	21	22	23	24	25	26	27	28	29	30	31	32	33	34	35	36	37	38	39	40	41	42	43	44	45	46	47	48	49
1	19.345	16.953	57.515	66.772	94.23	97.662			133.96		237.758		272.6		296.314		330.636	315.451	360.694		350.813		379.623		401.152		395.432		403.024		418.625		419.665		470.316		441.403		444.731		474.477		513.895		512.647		500.478		519.199
2	29.2258	59.9076	77.3807	99.118	75.8206	107.75	138.016	162.042	159.13	211.445	253.255	258.04			407.704		437.97				485.917				445.251			545.825					590.027				589.091			738.34				700.586
3	56.6834	79.2528	94.5417		142.073		166.098		205.62		261.056		324.5			363.918				443.587				482.381					528.04				558.618				572.762				579.419			592.524				568.81
4	30.9939	38.7943	54.8113	79.9808	122.207	134.584	150.809	160.898	186.275	204.476	195.324	222.989	214.357	234.846	274.472	301.826						404.896						453.571					451.179						466.884					442.443
5	14.8729	22.5694	26.4176	23.2974	29.5378	46.0748	71.8683	146.857	173.69							245.871						275.201									289.241							288.201							265.528
6	50.755		101.302	112.327	93.5016	98.8059	153.201	148.313		233.702		265.736		296.626	341.036		362.046			354.037		407.6									424.137								462.516						443.587
7	19.761	46.699	59.804	75.405	76.341			146.337		168.49	203.748	246.495	268.752			239.526				282.585		273.848	244.727				253.879						273.432				264.488						286.121					298.186
8	19.7612	40.1464	59.9076	67.5001		128.968		138.12		172.65		216.437		249.719		239.63				282.481			327.308				379.103				397.512		414.361							431.106						438.074
9	31.9299	84.6611		98.2859	110.143	145.817	146.025	186.483		189.707	219.141	190.643	244.207	237.446	260.016	282.585		307.754	288.097	332.196			350.397				368.598							389.191							388.463						363.918
10	16.017	47.0108		74.8845		101.302		136.456		176.499		263.136		315.555		318.155		390.647		415.297		385.031					504.43		543.069			581.707					626.326			660.648		678.745			668.656
11	45.5547	56.8914	62.1957		88.6133		134.064		155.489		216.541			278.529			266.672						303.906									344.053						325.644							318.883
12	46.907	37.026	88.301	110.143	104.214	119.399	132.816	162.562	173.066	181.491		337.188		383.055		416.961		473.436		573.698		564.962		595.54		592.94		574.947		631.214		581.083		635.166		703.914		718.163		717.539		775.679		733.452		729.604		728.252
13	29.3298	56.1634		95.2697		106.398		124.703		192.412		262.72		306.194		344.469		386.799		427.154					474.685					503.494					445.459					475.829					449.827
14	15.913		49.507		62.1957	70.5162		117.631		156.425		180.139	231.518	233.286	248.679		310.979					325.228			396.992			470.524						457.315				489.765					385.759						379.727
15	33.594		43.1626	68.7481			130.216		125.64		184.507		178.059		248.055		273.224			322.315				365.894		329.388			374.11		377.231						419.665					458.98				506.51
16	19.9692	39.8344	49.923		55.0193		75.6125	99.326	143.321		180.659		183.779	202.604				229.542							281.961					264.904							200.732					187.003					200.316
17	11.4407		50.651		74.7805		97.0378		136.248		153.409		165.474			281.857			241.086										272.6						230.998										241.399
18	33.906	79.9808			129.072			132.4			194.804			246.079			277.905				347.277				377.231					356.013					418.729					425.178					423.409
19	18.513	33.49	49.923	60.116	82.893	92.254	97.766					208.429	240.462		220.285	246.911	265.528	271.04		257.831	285.601			288.305	293.194	290.593	311.499	308.483		280.921	300.89	296.002		306.818		292.986		326.788		289.241	329.492		338.852		337.708	328.14		343.117
20	37.1302	46.5948	43.2666	61.8837	73.6364	99.846	93.6056	121.999	129.28	164.33			170.362					192.516							189.811							177.227					214.877								148.729
21	14.1448					48.2589		91.0055		106.294	164.226		143.425		275.617		321.795			387.735	394.132		400.528				400.424			437.97			470.42			486.853			521.903			540.832			629.966
22	29.2258			64.8999				123.351				172.858					195.636									266.36						303.178								326.892		353.881			380.871
23	26.3136		73.6364			137.704					161.314				168.802					292.674	297.25				355.493					384.303					408.225		412.229			416.233					434.226
24	12.2727	36.6102	55.0193	50.131	48.1549	63.1318	73.2204		131.568		148.729		155.177		176.915		181.491		185.755								235.886							267.088						318.363								345.613
25	45.035	73.012	80.085			88.613					183.987			208.741		232.454			244.311			257.207	281.441			276.033	285.913		292.258		329.492					334.796		326.164			363.294	333.028				371.094	398.344	410.825
26	50.027	62.2997		79.2528		88.3013			156.425			174.21			202.604			219.661		244.727		260.536		270			279.673			299.85				323.043				357.365					357.157					397.616
27	66.876	89.757	114.199	110.351	113.575	137.392		139.992			209.469		234.846	289.865		312.123	319.195	318.363			364.854	405.52	377.127		436.826		480.613		463.66		480.613		477.805	473.124	520.239		493.926		513.375		524.816		525.232		505.47		519.823		514.727
28	30.9939	63.1318		78.4207		95.3737		107.022		161.418		176.291		186.587		260.64	303.282	358.822		416.129					471.772					539.272						543.121				587.115						506.926
29	41.8105	63.5478		67.7081		84.4531		139.68				239.006			300.89							350.813							384.927						349.461					376.711					314.099
30	7.488	25.794	41.186	70.516	68.332	92.67	94.126	96.414	102.55		136.456		186.899		221.949			351.957	331.26		344.469		340.516	339.372	349.149		330.532		350.709		352.893		372.134		353.725		393.144		382.535		359.55		355.805		368.078		357.261		366.206
31	34.426	51.587	57.619	72.596	75.821	90.485	98.598	115.551		148.729				170.674			295.898	286.953	312.851	293.506		300.682	309.315		311.187	311.603			292.778	315.971		297.042		301.722	305.258		323.979	314.515		317.323		310.147		304.322	305.778		320.859	309.315
32	2.704	30.162	41.082	39.938	50.027	56.059	62.092	64.588		119.919	141.657	148.937	146.441	163.186	176.291	173.482	202.292	217.685	223.197		229.022	226.318	234.95	223.197	210.509	236.406	230.894	223.509	223.405		220.597		227.462	235.99	220.909	222.157	227.358	233.286	217.269	231.414	230.374		231.83		224.237		234.118		238.07
33	22.5694	50.547		82.893		70.3082		106.814		135.416		204.58		204.268			230.27		268.648		258.664				289.449			284.561			272.392				279.361					274.16			273.744		325.644
34	13.4168		25.5855			61.9877			97.3499			166.93		242.231			296.834			344.989		391.48			430.066					430.17					348.733					357.781					383.575
35	24.1294	39.1063		71.2443		111.599		125.328		124.183	128.032	131.152	138.12	126.16	133.96	152.993	107.022	134.792	151.017	177.747	170.154	189.603	208.845	234.95	228.814	256.791	238.486	233.182	244.103	256.791		286.745	282.897		282.481				302.658				269.48				284.145
36	21.1133	33.906	50.131		58.9715		80.3968			123.455					117.631		164.018					151.433						169.114		202.5			286.329			303.906			311.603		308.275		290.593				353.309
37	22.985	45.867	45.763		69.164	59.596	82.789	90.485		130.216	132.192			209.053		292.986	318.987		322.939		361.214		357.469		349.981		366.726		364.542		383.471		374.423		422.057		428.506		400.216		405.104		399.592		404.792		439.218		427.362
38	10.8166		40.3544		52.5232		69.8922		93.8136		115.031	116.695		114.823		149.145		231.206		246.391		229.126		274.368		356.741		356.221							449.931					454.403						478.325
39	68.0201		96.8298			137.392			144.985			185.131				209.365			222.261			259.288				303.282					350.293				369.95					404.168					386.383
40	12.897	13.313	30.786	37.754			63.132			90.797	112.119		104.318			112.119	121.791		128.24	131.152		122.727		130.008		130.008	138.952	141.032		143.425		149.145		151.017		174.106		188.563		219.765		199.276		195.844		240.358		243.375
41	18.4091	30.9939		42.9546		54.4993		93.2936				116.487				139.68				187.211		212.069				255.231					264.072				269.584		281.129		280.089	285.965	291.842		278.425			302.658
42		16.953	35.8822		52.3151		61.9877		72.9084		114.095		139.264			198.028				215.293						238.902							196.468							219.453					227.254
43	32.658	40.3544		42.0185	59.2836			80.8129		120.127		107.646		113.575	126.264	155.697		226.422	225.902	242.855	263.968	254.399	256.791	272.08				320.859				334.484							402.816					456.379			503.702
Average	28.3318	47.0581	58.559	71.586	79.3248	94.2401	103.335	124.388	140.073	157.723	175.979	199.647	196.977	227.868	233.194	246.54	265.88	289.003	250.447	312.345	319.487	297.522	312.353	316.009	349.64	295.714	325.065	340.152	364.402	360.486	347.247	335.067	385.373	354.048	361.495	382.73	392.641	356.845	392.216	406.078	386.828	426.397	346.653	489.364	378.293	433.521	372.958	405.012	407.548
	15.3379	19.5114	22.3612	22.3433	27.233	28.5687	33.2159	28.1245	33.2383	36.5064	43.4884	56.1647	55.7566	66.5688	75.1854	76.6545	79.005	83.5841	65.9296	100.979	77.6366	101.161	57.568	122.541	85.5781	100.821	94.0007	137.224	97.61	131.233	69.6741	136.836	115.813	131.817	85.0165	167.928	134.165	141.819	92.53	151.791	99.2734	193.281	87.8656	184.592	122.538	137.376	100.149	143.549	96.2218
[truncated: 2 more columns]

## Sheet: Volume_NormalSpreading
Cell\Time	1	2	3	4	5	6	7	8	9	10	11	12	13	14	15	16	17	18	19	20	21	22	23	24	25	26	27	28	29	30	31	32	33	34	35	36	37	38	39	40	41	42	43	44	45	46	47	48	49
1	1738.7	1752.23	1749.62	1744.08	1751.33	1741.95	1742.04	1729.39	1715.76	1702.85	1688.43	1672.28	1665.78	1648.72	1646.33	1634.29	1620.66	1604.22	1598.73	1596.22	1575.56	1579.89	1567.43	1561.86	1563.78	1549.15	1550.95	1543.98	1535.03	1541.64	1533.37	1540.81	1530.36	1534.74	1541.61	1538.31	1541.62	1543.71	1541.87	1542.46	1546.71	1553.85	1547.79	1554.57	1553.92	1559.94	1559.29	1558.56	1571.25
2	2518.59	2516.03	2528	2526.08	2521.6	2509.56	2506.95	2490.66	2488.38	2470.04	2461.92	2439.89	2438.69	2434.39	2429.9	2419.55	2416.89	2404.65	2394.96	2392.92	2398.94	2396.59	2407.28	2387.56	2397.62	2400.86	2417.9	2420.82	2397.65	2415.38	2437.11	2437.99	2432.02	2442.67	2450.55	2452.32	2445.31	2456.05	2456.99	2460.84	2460.32	2474.16	2473.98	2479.05	2480.2	2484.61	2485.84	2488.96	2492.36
3	1923.32	1910.96	1899.56	1879.38	1861.22	1855.12	1853.4	1835.06	1829.05	1810.04	1806.28	1798.23	1782.1	1789.28	1786.63	1791.96	1796.65	1797.97	1800.17	1789.98	1820.79	1819.37	1817.24	1830.9	1823.56	1830.49	1817.67	1840.35	1838	1847.26	1848.69	1854.37	1861.21	1856.68	1864.72	1840.3	1869.71	1862.53	1865.61	1874.02	1880.14	1878.11	1887.41	1880.08	1878.66	1878.34	1886.92	1885.99	1888.51
4	1458.75	1457.65	1467.51	1468.72	1464.44	1466.85	1477.25	1468.56	1470.26	1464.64	1460.65	1444.33	1449.9	1438.63	1441	1432.21	1419.87	1435.09	1431.93	1440.5	1433.17	1434.23	1434.77	1436.81	1436.02	1434.61	1447.33	1448.17	1460.11	1454.49	1465.23	1466.36	1487.62	1480.53	1495.34	1494.05	1515.12	1516.25	1514.08	1529.87	1516.43	1532.65	1533.92	1524.68	1531.04	1540.3	1536.14	1533.63	1537.78
5	1147.19	1151.92	1157.59	1148.33	1148.53	1142.24	1131.05	1137.6	1122.26	1120.4	1100.18	1099.9	1090.97	1092.12	1085.6	1087.76	1086.66	1078.44	1077.4	1073.46	1069.54	1077.17	1069.41	1071.85	1077.1	1070.81	1080.81	1068.31	1074.39	1066.58	1065.62	1060.3	1070.21	1074.95	1074.69	1073.56	1071.82	1078.72	1085.28	1083.31	1078.64	1072.9	1079.54	1079.16	1073.77	1082.88	1090.93	1086.49	1086.8
6	1664.82	1664.52	1656.98	1666.63	1652.21	1647.42	1663.54	1659.72	1659.59	1660.13	1649.33	1647.34	1654.17	1645.52	1638.75	1624.87	1613.22	1612	1603.99	1600.59	1601.67	1595.85	1591.15	1588.48	1590.91	1582.72	1581.76	1584.87	1572.1	1578.31	1581.93	1584.6	1570.01	1583.9	1580.32	1589.58	1584.37	1594.77	1595.7	1597.34	1590.37	1594.84	1595.31	1597.07	1606.9	1607.95	1607	1610.48	1615.22
7	1998.06	2000.04	2009.95	2014.33	2008.74	2009.86	1990.91	2003.62	1978.86	1972.79	1976.37	1953.26	1950.75	1948.99	1943.89	1938.5	1941.05	1941.21	1940.54	1935.57	1937.81	1949.57	1944.33	1947.02	1956.05	1956.74	1956.18	1956.43	1959.89	1963.28	1960.86	1957.06	1964.67	1967.4	1959.97	1979.18	1983.59	1986.09	1996.9	1999.45	1995.41	2004.73	1999.83	1994.04	2002.02	1998.84	1995.84	2008.12	2016.02
8	1481.17	1478.97	1481.42	1479.82	1458.34	1453.17	1445.33	1439.29	1424.47	1411.35	1398.31	1386.34	1366.02	1357.56	1353.35	1341.57	1340.79	1333.33	1329.83	1317.28	1307.51	1298.32	1298.8	1286.3	1285.14	1290.21	1284.97	1295.77	1297.9	1301.66	1297.26	1311.89	1312.12	1315.51	1323.99	1330.74	1328.77	1322.54	1342.05	1346.17	1358.45	1364.08	1365.85	1382.68	1387.01	1393.42	1400.68	1410.47	1411.57
9	1305.99	1304.75	1300.92	1296.62	1287.58	1277.1	1268.54	1263.75	1253.63	1241.45	1236.38	1224.89	1211.95	1197.84	1195.41	1176.58	1182.06	1180.25	1169.86	1166.86	1165.19	1160.3	1154.11	1166.07	1161.23	1165.43	1156.37	1158.57	1167.6	1169.91	1164.6	1169.78	1170.21	1169.93	1181.72	1180.95	1188.93	1201.29	1191.11	1201.74	1202.13	1200.86	1207.34	1209.61	1206.79	1210.94	1211.53	1212.23	1229.05
10	2400.04	2390.46	2389.1	2367.76	2350.24	2337.55	2323.58	2304.45	2293.31	2276.71	2259.2	2251.51	2231.21	2225.42	2209.51	2205.2	2192.49	2184.04	2172.17	2168.78	2167.49	2169.66	2151.5	2142.3	2143.15	2133.41	2130.03	2123.91	2117.35	2124.42	2118.86	2121.65	2121.06	2133.05	2125.49	2130.16	2143.86	2131.63	2147.85	2158.31	2167.9	2171.28	2160.75	2176.66	2187.33	2185.46	2209.87	2215.84	2222.03
11	1936.07	1926.89	1915.64	1883.84	1879.67	1871.72	1865.19	1865.77	1854.65	1851.9	1840.2	1825.78	1817.84	1826.87	1820.53	1816.5	1815.73	1804.27	1806.75	1807.95	1813.54	1813.31	1812.62	1823.09	1820.42	1817.92	1805.78	1802.38	1800.15	1793.74	1802	1808.85	1805.56	1806.06	1804.74	1805.58	1824.44	1823.51	1838.79	1844.31	1845.42	1861.32	1865.58	1890.65	1906.85	1884.77	1886.92	1892.23	1930.83
12	2293.23	2304.12	2307.32	2278.45	2291.62	2279.63	2276.01	2268.64	2248.5	2228.24	2207.25	2197.73	2171.63	2161.9	2148.18	2125.37	2102.04	2084.49	2064.93	2057.97	2038.94	2029.67	2019.64	2016.05	2005.17	1998.87	2009.17	2001.54	1998.9	1993.1	1988.73	1986.74	1981.99	1980.82	1986.84	1984.63	1992.29	1985.38	1986.36	1993.11	1991.8	1987.37	1999.16	2000.99	1998.87	2001.33	2005.14	2009.23	2011.48
13	1918.11	1906.83	1899.17	1877.31	1876.49	1859.06	1851.44	1848.73	1853.61	1851.07	1840.62	1831.28	1823.23	1815.43	1807.65	1788.8	1790.58	1789.63	1775.23	1780.4	1766.19	1763.82	1759.82	1758.39	1755.64	1768.28	1781.18	1772.71	1778.86	1784.98	1783.28	1788.41	1796.22	1806.19	1808.44	1814.33	1822.53	1835.9	1843.7	1843.55	1850.17	1861.48	1866.13	1872.33	1884.68	1886.66	1896.13	1903.73	1919.48
14	1224.12	1220.73	1231.1	1237.1	1227.65	1230.09	1229.72	1232.48	1229.23	1222.16	1227.83	1217.85	1208.98	1201.37	1187.77	1180.54	1171.28	1169.07	1166.25	1155.99	1150.05	1152.21	1148.43	1146.62	1154.25	1151.74	1156.81	1162.58	1160.05	1165.83	1170.85	1167.66	1182.27	1190.63	1188.18	1195.63	1201.32	1212.91	1225.48	1217.75	1221.96	1219.29	1230.83	1244.46	1242.1	1234.7	1240.06	1249.68	1246
15	1746.87	1749.67	1729.27	1740.06	1750.27	1742.41	1741.55	1761.05	1757.57	1781.72	1784.39	1789.75	1790.53	1790.81	1801.93	1791.28	1785.55	1774.04	1762.08	1775.44	1759.64	1761.43	1766.78	1758.7	1756.31	1774.41	1741.27	1741.05	1759.57	1757.37	1748.73	1760.22	1749.49	1754.78	1742.8	1751.12	1751.29	1764.77	1765.61	1769.67	1769.23	1768.63	1774.4	1769	1772.98	1770.64	1776.08	1772.77	1780.08
16	1319.18	1317.28	1319.78	1312.65	1309.38	1311.95	1303.82	1300.48	1300.17	1292.36	1282.78	1278.31	1275.85	1267.8	1256.06	1259.4	1247.77	1234.74	1226.6	1233.12	1228.05	1222.19	1218.74	1213.64	1222.64	1216.56	1217.9	1214.6	1212.05	1213.36	1216.1	1222.58	1224.51	1215.06	1216.2	1225.61	1215.37	1217.15	1219.48	1216.96	1221.01	1232.72	1235.96	1226.07	1235.75	1223.43	1240.17	1234.13	1236.35
17	1671.55	1675.61	1672.09	1672.5	1678.88	1672.56	1675.84	1665.18	1671.82	1672.23	1674.63	1665.49	1658.42	1666	1670.9	1656.08	1668.49	1658.46	1661.43	1665.57	1655.43	1664.97	1679.1	1690.32	1698.55	1711.16	1720.03	1742.59	1738.45	1761.32	1772.32	1788.03	1804.34	1818.46	1832.17	1849.78	1856.46	1877.45	1881.4	1898.01	1904.95	1920.76	1928.18	1940.53	1935.26	1944.91	1940.6	1938.47	1937.61
18	1594.03	1558.85	1527.19	1504.27	1471.42	1461.68	1446.4	1430.99	1425.86	1422.47	1414.93	1401.53	1399.81	1392.75	1366.47	1365.31	1355.5	1338.56	1336.66	1330.63	1316.32	1325.5	1317.97	1311.64	1306.26	1314.18	1308.53	1316.05	1317	1311.1	1322.87	1316.45	1318.31	1333.58	1319.66	1332.12	1325.67	1329.49	1336.85	1338.13	1336.49	1349.22	1345.59	1355.26	1359.06	1364.03	1376.42	1372.45	1369.5
19	1703.33	1696.87	1709.41	1705.34	1698.99	1702.67	1706.12	1703.02	1662.53	1646.18	1633.69	1634.43	1628.23	1621.6	1611.45	1597.61	1590.64	1604.84	1588.38	1590.56	1599.57	1604.99	1622.67	1618.25	1627.2	1629.29	1635.59	1648.97	1652.13	1644.89	1651.8	1665.68	1668.92	1670.86	1672.37	1683.41	1674.21	1677.6	1675.08	1671.28	1672.69	1686.23	1680.28	1673.94	1671.03	1672.26	1672.08	1682.35	1684.51
20	1504.49	1483.98	1470.02	1453.12	1443.61	1420.32	1411.45	1405.82	1385.71	1379.23	1371.19	1370.74	1365.54	1374.92	1369.02	1379.08	1384.04	1375.23	1370.75	1375.4	1359.67	1357.68	1351.72	1358.98	1355.28	1364.32	1364.29	1374.81	1377.09	1381.55	1383.22	1384.46	1380.44	1401.23	1404.35	1402.5	1414.12	1412.59	1411.05	1424.67	1426.52	1440.57	1451.29	1447.74	1452.77	1455.77	1461.05	1473.44	1469.45
21	2287.87	2246.21	2225.77	2200.28	2167.14	2166.21	2155.28	2155.72	2152.82	2153.55	2161.67	2147.58	2152.21	2149.52	2143.65	2140.65	2132.73	2128.36	2122.7	2116.36	2101.67	2114.67	2113.95	2127.16	2137.36	2142.54	2147.91	2155.38	2159.49	2164.11	2167.1	2164.96	2174.21	2198.19	2187.38	2207.39	2215.9	2220.66	2221.42	2238.63	2236.62	2250.53	2258.35	2251.86	2260.57	2275.11	2274.03	2275.43	2285.65
22	2165.8	2130.01	2118.45	2096.45	2079.03	2060.68	2050.67	2030.48	2031.09	2017.5	2000.31	1991.35	1988.55	1972.71	1972.56	1959.26	1951.1	1947.5	1937.61	1925.02	1911.34	1918.91	1921.76	1923.2	1917.14	1925.18	1907.93	1895.88	1897.34	1892.23	1886.88	1888.65	1888.33	1884.5	1885.83	1887.15	1880.05	1882.93	1870.63	1872.29	1871.39	1865.15	1869.51	1870.04	1868.66	1871.9	1873.27	1868.96	1868.17
23	2626.51	2599.08	2591.54	2585.75	2564.56	2571.95	2555.12	2550.05	2551.12	2536.96	2539.54	2533.24	2538.63	2542.09	2532.9	2529.07	2536.11	2531.2	2535.95	2543.14	2511.37	2520.17	2523.05	2514.36	2508.01	2495.73	2493.74	2499.26	2482	2478.93	2466.63	2455.57	2446.37	2447.41	2444.47	2445.64	2434.84	2443.22	2445.68	2445.39	2456.13	2452.74	2463.97	2471.27	2489.3	2481.39	2487.35	2479.21	2479.9
24	1481.93	1487.38	1488.96	1502.57	1489.81	1494.18	1486.07	1481.09	1477.26	1458.85	1451.64	1464.94	1452.64	1441.1	1443.88	1433.89	1426.95	1422.35	1430.68	1419.99	1418.37	1404.6	1398.42	1398.99	1398.9	1390	1385.83	1385.96	1366.31	1382.09	1374.75	1375.84	1360.74	1355.08	1347.67	1344.45	1344.39	1341.36	1348.25	1343.24	1332.05	1335.88	1328.58	1327.01	1322.49	1335.68	1315.43	1324.06	1320.28
25	2410.09	2387.95	2380.46	2388.35	2369.43	2375.85	2364.1	2341.96	2332.13	2311.83	2295.97	2291.6	2289.8	2281.37	2278.93	2269.26	2262.62	2251.47	2245.76	2247.27	2234.46	2225.17	2216.06	2214.26	2204.91	2202.85	2203.24	2192.53	2188.54	2191.88	2192.78	2193.04	2187.95	2182.83	2176.82	2181.58	2189.41	2176.6	2168.54	2165.61	2166.4	2158.51	2161.87	2162.48	2155.13	2156.98	2141.43	2149.71	2151.67
26	1433.7	1427.83	1408.15	1398.51	1398.42	1389.79	1368.31	1376.09	1361.04	1355.58	1349.56	1348.71	1343.4	1335.69	1322.07	1317.51	1306.11	1294.6	1283.25	1282.7	1282.31	1268.27	1273.26	1261.98	1258.77	1263.04	1271.66	1248.75	1249.67	1251.4	1255.45	1253.24	1250.2	1248.36	1246.86	1247.62	1249.96	1252.4	1245.49	1243.15	1251.3	1245.88	1256.14	1247.15	1253.22	1249.25	1252.65	1259.96	1253.02
27	2230.2	2220.77	2229.23	2252.3	2258.71	2251.51	2252.4	2249.99	2235.77	2228.65	2215.22	2210.76	2204.9	2201.03	2198.52	2203.97	2198.39	2187.32	2179.72	2166.98	2156.1	2146.44	2146.76	2144.84	2149.1	2142.79	2138.49	2136.18	2144.53	2129.75	2132.95	2132.78	2129.98	2118.61	2120.61	2131.91	2123.65	2128.39	2129.44	2131.53	2133.61	2130.18	2122.94	2123.57	2139.4	2130.87	2143.51	2145.97	2141.69
28	2211.88	2217.82	2217.98	2210.86	2223.13	2225.09	2217.02	2222.23	2209.08	2204.05	2199.52	2185.1	2192.02	2173.93	2175.99	2168.25	2151.06	2150.44	2149.55	2144.19	2159.4	2171.49	2193.88	2192.44	2201.7	2172.24	2191.25	2173.58	2169.63	2183.93	2182.87	2180.24	2185.06	2181.94	2189.02	2183.33	2181.51	2184.86	2192.94	2186.05	2177.6	2178.4	2180.06	2176.44	2176.31	2169.96	2169.99	2174.24	2170.79
29	2071.09	2034.34	1999.68	1969.94	1957.53	1935.93	1922.19	1902.87	1891.85	1877.78	1876.74	1869.12	1876.32	1869.92	1865.01	1850.94	1852.85	1843.39	1844.65	1836.22	1821.47	1830.38	1827.04	1820.74	1821.97	1829.62	1827.68	1841.24	1851.97	1848.95	1839.34	1831.2	1830.1	1842.83	1854.29	1856.38	1854.78	1866.42	1885.99	1875.61	1885.76	1883.33	1900.06	1907.1	1904.88	1916.33	1920.95	1920.67	1942.09
30	2735.4	2751.49	2761.62	2766.51	2772.23	2792.66	2793.31	2797.88	2810.16	2807.6	2808.91	2810.07	2793.83	2784.96	2785.36	2769.41	2758.37	2759.23	2753	2730.95	2734.81	2730.97	2728.09	2717.88	2706.66	2715.28	2707.36	2702.49	2690.48	2695.64	2685.97	2686.55	2700.58	2688.05	2680.33	2667.36	2685.91	2686.15	2681.8	2678.27	2668.12	2677.8	2670.21	2671.55	2674.1	2673.26	2688.54	2689.98	2675.58
31	2008.86	2017.41	2023.83	2032.01	2018.11	2014.41	2017.36	2008.61	2007.78	2005.18	1994.56	1992.08	1989.73	1988.62	1983.75	1971.52	1980.88	1966.43	1973.05	1971.67	1965.93	1964.81	1961.55	1957.81	1953.47	1970.69	1965.39	1954.33	1966.16	1961.2	1961.79	1963.29	1962.86	1967.06	1959.94	1963.89	1968.12	1963.54	1958.49	1957.23	1956.55	1958.26	1948.51	1949.44	1939.76	1930.3	1936.88	1935.94	1930.34
32	1041.56	1039.14	1040.75	1044.25	1053.21	1042.47	1034.6	1028.05	1034.08	1032.95	1029.9	1033.22	1027.7	1026.33	1029.52	1037.15	1033.61	1036.3	1035.19	1022.42	1023.41	1023.31	1037.51	1030.04	1028.49	1026.45	1030.18	1018.87	1023.13	1025.41	1016.24	1022.34	1019.25	1019.6	1021.81	1016.35	1022.33	1022.94	1017.55	1017.76	1019.72	1026.4	1022.74	1030.4	1032.19	1031.16	1033.09	1034.44	1040.63
33	1635.39	1619.9	1610.94	1612.32	1614.99	1612.98	1605.41	1603.98	1591.94	1598.64	1591.94	1597.12	1599.44	1590.2	1568.21	1569.26	1558.32	1562.73	1554.14	1555.6	1557.24	1554.56	1549.88	1549.91	1540.01	1539.74	1542.48	1537.78	1551.93	1537.02	1532.82	1551.75	1559.22	1554.8	1561.84	1574.39	1574.25	1577.99	1581.07	1566.56	1575.75	1579.31	1572.73	1579.19	1576.76	1577.27	1572.25	1579.48	1575.25
34	1390.41	1367.02	1385.49	1380.11	1373.13	1375.01	1367.87	1370.96	1367.95	1367.19	1365.14	1360.92	1363.36	1356.98	1348.53	1343.66	1330.92	1321.84	1321.6	1323.74	1323.39	1337.19	1316.99	1319.16	1318.79	1315.12	1316.59	1328.29	1326.1	1320.07	1324.4	1333.93	1328.66	1332.92	1331.93	1332.43	1337.72	1337.93	1343.83	1334.13	1345.32	1332.77	1337.84	1344.04	1338.94	1346.96	1347.01	1351.5	1346.56
35	1165.26	1162.74	1148.93	1151.17	1134.95	1121.72	1119.03	1112.77	1106.78	1118.57	1118.37	1115.99	1114.71	1125.96	1130.54	1133.92	1137.55	1134.73	1130.45	1133.72	1123.36	1129.92	1129.54	1125.43	1131.54	1124.96	1132.48	1127.85	1117.28	1143.06	1145.33	1134.87	1142.76	1144.48	1141.82	1149.4	1142.51	1147.53	1146.81	1140.13	1156.91	1161.97	1162.33	1163.92	1167.02	1163.17	1168.92	1170.05	1167.2
36	1577.77	1571.65	1563.67	1553.26	1538.45	1541.1	1536.9	1524.92	1528.14	1520.4	1516.48	1511.7	1499.03	1497.57	1483.6	1493.25	1495.75	1487.58	1489.23	1486.2	1491.93	1483.07	1489.5	1498.34	1493.14	1502.13	1494.27	1483.53	1482.27	1488.86	1496.47	1517.42	1532.41	1527.56	1549.94	1547.42	1556.01	1566.16	1571.71	1573.26	1584.87	1587.75	1595.79	1588.89	1586.65	1599.15	1597.3	1588.42	1588.46
37	1617.16	1649.45	1669.75	1640.35	1654.19	1752.09	1774.33	1763.61	1770.95	1761.21	1783.52	1773.77	1772.05	1765.41	1756.13	1765.95	1766.55	1751.23	1747.17	1715.53	1746.82	1735.09	1731.16	1651.47	1704.91	1715.87	1715.68	1735.57	1715.88	1712.53	1725.17	1698.69	1703.94	1704.54	1701.68	1672.01	1688.34	1693.13	1699.56	1709.2	1697.67	1702.9	1702.55	1706.01	1711.11	1696.57	1683.49	1695.08	1690.95
38	2241.55	2219.7	2226.46	2199.48	2196.35	2186.9	2174.17	2177.46	2171.04	2174.72	2159.66	2163.63	2159.19	2150.25	2146.07	2150.69	2139.69	2129.45	2123.56	2127.79	2130.33	2124.29	2115.69	2103.73	2100.96	2095.12	2092.93	2072.56	2064.63	2058.84	2063.71	2051.86	2052.76	2044.49	2037.42	2033.69	2022.35	2026.51	2037.42	2016.48	2020.56	2023.57	2022.18	2015.19	2022.06	2018.44	2019.27	2013.24	2014.57
39	2323.11	2309.96	2302.34	2300.71	2302.29	2300.03	2299.56	2312.68	2307.84	2313.15	2322.39	2316.78	2315.96	2309.02	2318.18	2329.88	2322.25	2329.98	2321.99	2312.94	2303.6	2311.54	2301.04	2303.76	2297.44	2299.38	2304.8	2312.37	2321.64	2322.2	2326.47	2331.91	2340.2	2338.52	2340.06	2338.31	2350.24	2356.06	2358.11	2359.32	2362.04	2369.23	2382.79	2373.58	2385.77	2389.51	2392.87	2404.11	2407.02
40	1282.15	1289.58	1283.8	1290.86	1287.04	1285.29	1284.23	1282.18	1262.39	1270.97	1262.74	1248.65	1246.68	1255.55	1251.45	1251.17	1246.11	1242.61	1244.14	1249.54	1240.92	1240.11	1240.52	1240.41	1232.99	1235.11	1234.08	1231.45	1232.09	1225.29	1236.74	1227.44	1230.5	1233.44	1239.63	1234.13	1238.98	1232.56	1226.01	1229.45	1219.61	1224.47	1228.53	1210.46	1219.71	1208.26	1211.53	1211.99	1214.43
41	1704.29	1697.81	1697.16	1691.33	1688.53	1678.12	1680.45	1674.49	1663.65	1672.82	1661.15	1660.34	1657.85	1658.38	1650.72	1640.65	1641.15	1626.91	1623.16	1619.86	1613.13	1608.78	1604.29	1597.02	1599.48	1587.05	1587.74	1583.05	1575.08	1576.59	1572.16	1565.37	1555.61	1557.85	1550.81	1557.18	1543.75	1545.17	1543.69	1536.54	1539.15	1542.98	1548.21	1551.47	1543.72	1554.47	1560.07	1569.78	1572.83
42	1287.87	1278.12	1285.19	1270.93	1266.48	1255.16	1249.84	1248.78	1236	1227.6	1224.45	1232.82	1223.74	1218.22	1215.66	1209.04	1215.62	1206.82	1201.63	1194.77	1198.02	1188.19	1192.52	1179.39	1181.22	1181.38	1186.7	1179.86	1183.67	1176	1177.01	1172.3	1184.08	1185.46	1199.86	1189.09	1186.12	1178.62	1182.1	1186.54	1194.96	1179.29	1191.84	1186.39	1185.54	1178.25	1178.61	1190.45	1187.98
43	1204.48	1195.26	1195.41	1175.81	1176.36	1180.38	1177.79	1171.98	1171.64	1161.62	1166.45	1165.62	1161.1	1156.63	1150.86	1150.46	1137.8	1134.38	1129.35	1120.36	1123.16	1116.42	1123.76	1124.34	1109.41	1107.29	1096.7	1099.66	1089.2	1097.17	1101.48	1093.17	1095.65	1101.55	1088.53	1111.4	1105.97	1100.94	1108.18	1115.5	1115.94	1118.81	1118.14	1117.27	1118.8	1130.51	1128.53	1133.06	1119.17
Average	1783.3	1776.49	1773.89	1766.76	1760.84	1758.2	1753.4	1748.91	1741.81	1736.17	1730.47	1724.56	1719.64	1715.1	1709.82	1704.68	1700.1	1694.22	1689.68	1686.1	1682.27	1681.98	1680.69	1677.01	1677.5	1677.69	1677.67	1677.09	1675.89	1677.52	1678.56	1679.54	1681.23	1683.65	1684.48	1686.66	1689.49	1692.15	1695.02	1696.11	1697.78	1701.42	1704.07	1705.19	1707.89	1708.51	1711.06	1714.07	1716.28
1	100	100.778	100.628	100.309	100.726	100.187	100.192	99.4647	98.6808	97.938	97.1084	96.1798	95.8062	94.8248	94.6872	93.9951	93.2108	92.2656	91.9499	91.8054	90.6172	90.8659	90.1495	89.8288	89.9394	89.0983	89.2014	88.8008	88.286	88.6661	88.1908	88.6183	88.0173	88.2695	88.6646	88.4748	88.6653	88.785	88.6791	88.7133	88.9576	89.3685	89.0199	89.4097	89.3722	89.7188	89.6813	89.6391	90.369
2	100	99.8984	100.373	100.298	100.119	99.6416	99.5377	98.891	98.8006	98.0722	97.7501	96.8752	96.8275	96.6567	96.4784	96.0675	95.9622	95.4761	95.0915	95.0103	95.2494	95.1562	95.5803	94.7974	95.197	95.3255	96.0023	96.1181	95.198	95.902	96.7649	96.7999	96.5628	96.9857	97.2985	97.3687	97.0905	97.5169	97.5543	97.7072	97.6864	98.2361	98.2288	98.4301	98.4759	98.6509	98.6997	98.8236	98.9587
3	100	99.3573	98.7645	97.7153	96.771	96.4536	96.3647	95.411	95.0982	94.1101	93.9143	93.4957	92.6571	93.0308	92.8928	93.1698	93.4137	93.4826	93.5969	93.067	94.6691	94.5952	94.4842	95.1945	94.8129	95.1733	94.5069	95.6858	95.5637	96.0452	96.1195	96.4148	96.7703	96.5349	96.9529	95.6834	97.2125	96.8393	96.9991	97.4364	97.7545	97.6492	98.1325	97.7515	97.6776	97.6611	98.1072	98.0592	98.19
4	100	99.9248	100.601	100.683	100.391	100.556	101.269	100.672	100.789	100.404	100.13	99.0116	99.3935	98.6212	98.7837	98.181	97.3348	98.3784	98.1619	98.7494	98.2467	98.3192	98.356	98.4959	98.4419	98.3456	99.2172	99.2747	100.093	99.7081	100.445	100.522	101.979	101.493	102.508	102.42	103.864	103.942	103.793	104.876	103.954	105.066	105.153	104.52	104.956	105.591	105.306	105.134	105.418
5	100	100.412	100.906	100.1	100.116	99.5683	98.5926	99.1643	97.8268	97.6644	95.902	95.8779	95.0991	95.1998	94.631	94.8197	94.7235	94.0069	93.9165	93.5726	93.2313	93.8959	93.2199	93.4323	93.8899	93.342	94.2135	93.1237	93.6543	92.9727	92.8895	92.4254	93.2892	93.7027	93.6801	93.5812	93.4301	94.0316	94.6035	94.4315	94.0246	93.5242	94.1033	94.0693	93.5997	94.3936	95.0955	94.7087	94.7357
6	100	99.9819	99.5288	100.109	99.2426	98.9549	99.9229	99.6938	99.6855	99.7182	99.0697	98.9503	99.3603	98.8404	98.4343	97.6001	96.9004	96.8272	96.3463	96.1417	96.2067	95.8574	95.5747	95.4144	95.5605	95.0684	95.011	95.1975	94.4308	94.8034	95.0211	95.1812	94.3053	95.1393	94.9241	95.4804	95.1676	95.7925	95.848	95.947	95.5279	95.7968	95.8248	95.9302	96.5211	96.5838	96.527	96.7357	97.0205
7	100	100.099	100.595	100.814	100.535	100.59	99.6424	100.279	99.0393	98.7355	98.9148	97.7579	97.6322	97.5441	97.2892	97.0191	97.1468	97.1548	97.1213	96.8724	96.9845	97.5733	97.3109	97.4458	97.8975	97.9323	97.904	97.9168	98.0896	98.2593	98.1385	97.948	98.329	98.4657	98.0937	99.0551	99.2761	99.4009	99.9422	100.07	99.8674	100.334	100.089	99.7988	100.198	100.039	99.8888	100.504	100.899
8	100	99.8513	100.017	99.9089	98.4589	98.1099	97.5802	97.1727	96.1723	95.2863	94.4059	93.5979	92.2258	91.6546	91.3704	90.5748	90.5225	90.0188	89.7825	88.9354	88.2758	87.655	87.6873	86.8438	86.7651	87.1076	86.7536	87.4827	87.6271	87.8804	87.5836	88.5713	88.5871	88.8159	89.388	89.8441	89.7106	89.2904	90.6074	90.8856	91.7151	92.0952	92.2143	93.3503	93.6431	94.0754	94.5661	95.2266	95.3014
9	100	99.9055	99.6118	99.2824	98.5904	97.7883	97.1323	96.7658	95.991	95.0585	94.6701	93.7902	92.7995	91.7191	91.5333	90.0912	90.5109	90.3726	89.5765	89.3472	89.2187	88.8444	88.3706	89.2867	88.9156	89.2371	88.5437	88.7122	89.4037	89.5807	89.1736	89.5706	89.6037	89.5822	90.4846	90.4254	91.0371	91.983	91.204	92.0179	92.0473	91.9505	92.4467	92.6199	92.4046	92.7218	92.7675	92.8212	94.1089
10	100	99.601	99.5443	98.6551	97.925	97.3963	96.8143	96.0172	95.5529	94.8615	94.1317	93.8113	92.9658	92.7244	92.0612	91.8818	91.3524	91.0001	90.5057	90.3643	90.3107	90.401	89.6443	89.2611	89.2964	88.8907	88.7499	88.4947	88.2214	88.5161	88.2845	88.4008	88.3762	88.8756	88.5605	88.7553	89.326	88.8165	89.4923	89.9283	90.3275	90.4683	90.03	90.6927	91.1373	91.0593	92.0765	92.3253	92.5829
11	100	99.526	98.9447	97.3023	97.0868	96.6763	96.3387	96.3691	95.7945	95.6527	95.048	94.3036	93.8934	94.3598	94.0321	93.8241	93.7841	93.1926	93.3204	93.3826	93.671	93.6593	93.6237	94.1643	94.0264	93.8973	93.2702	93.0946	92.9793	92.6483	93.0753	93.4291	93.259	93.2846	93.2166	93.2599	94.234	94.1861	94.9755	95.2604	95.3178	96.1393	96.359	97.6539	98.491	97.3503	97.4614	97.7358	99.7295
12	100	100.475	100.614	99.3555	99.9298	99.4073	99.2494	98.9279	98.0499	97.1662	96.251	95.8359	94.6975	94.2735	93.6751	92.6803	91.6631	90.8977	90.0448	89.7411	88.9115	88.5073	88.0696	87.9134	87.4389	87.1641	87.613	87.2806	87.1653	86.9125	86.7218	86.6351	86.428	86.3768	86.6397	86.5432	86.877	86.576	86.6185	86.913	86.8557	86.6626	87.1766	87.2567	87.1642	87.2714	87.4375	87.616	87.7139
13	100	99.4118	99.0123	97.8724	97.8297	96.9212	96.5238	96.3825	96.6373	96.5047	95.9596	95.473	95.0531	94.6468	94.241	93.2583	93.3508	93.3013	92.5506	92.8202	92.0793	91.9559	91.7474	91.6728	91.5296	92.1884	92.861	92.4196	92.7399	93.0593	92.9706	93.2381	93.6452	94.165	94.2824	94.5892	95.0169	95.714	96.1203	96.1124	96.4576	97.0471	97.2901	97.6128	98.257	98.3603	98.8536	99.2503	100.071
14	100	99.7224	100.57	101.06	100.288	100.488	100.457	100.682	100.417	99.84	100.302	99.4874	98.7632	98.1411	97.0306	96.4397	95.6833	95.503	95.2725	94.434	93.949	94.1251	93.8169	93.6689	94.2921	94.0872	94.5011	94.9724	94.7659	95.2381	95.6482	95.3874	96.5808	97.2639	97.0641	97.6721	98.1374	99.0837	100.111	99.4793	99.823	99.6052	100.548	101.661	101.468	100.864	101.302	102.088	101.787
15	100	100.16	98.9921	99.6101	100.195	99.7447	99.6954	100.811	100.612	101.995	102.147	102.454	102.499	102.515	103.152	102.542	102.214	101.555	100.871	101.635	100.731	100.833	101.139	100.677	100.54	101.576	99.6793	99.6666	100.727	100.601	100.106	100.764	100.15	100.452	99.7667	100.243	100.253	101.025	101.073	101.305	101.28	101.245	101.576	101.267	101.494	101.36	101.672	101.483	101.901
16	100	99.8561	100.046	99.5052	99.2569	99.4515	98.8354	98.5823	98.5589	97.9668	97.2403	96.9014	96.7156	96.1052	95.2152	95.4681	94.5866	93.5989	92.9815	93.4761	93.0916	92.6474	92.3859	91.9992	92.6815	92.2208	92.3223	92.0719	91.8785	91.9779	92.1859	92.6773	92.8231	92.1072	92.1937	92.9068	92.1307	92.2657	92.4423	92.2514	92.5584	93.4456	93.691	92.9415	93.6752	92.7412	94.0107	93.5528	93.7212
17	100	100.243	100.033	100.057	100.439	100.061	100.257	99.619	100.016	100.041	100.185	99.6378	99.2145	99.6682	99.9613	99.0746	99.8172	99.217	99.3946	99.6424	99.0358	99.6064	100.452	101.123	101.616	102.37	102.901	104.25	104.002	105.371	106.029	106.969	107.944	108.789	109.609	110.663	111.062	112.318	112.555	113.548	113.963	114.909	115.353	116.092	115.777	116.354	116.096	115.969	115.918
18	100	97.793	95.807	94.3688	92.308	91.6972	90.7387	89.7722	89.45	89.2374	88.7645	87.9241	87.816	87.3727	85.7241	85.6516	85.036	83.9732	83.854	83.4758	82.5782	83.1541	82.682	82.2847	81.9471	82.444	82.0893	82.5612	82.6208	82.2507	82.9889	82.5864	82.7032	83.6607	82.788	83.5696	83.1645	83.4047	83.866	83.9466	83.8434	84.6421	84.4142	85.0208	85.2597	85.5715	86.3487	86.0993	85.9147
19	100	99.6206	100.357	100.118	99.7449	99.9613	100.164	99.9816	97.6047	96.6449	95.9116	95.9549	95.5911	95.2016	94.6058	93.7931	93.3837	94.2177	93.2513	93.3795	93.9084	94.2267	95.2647	95.005	95.5306	95.653	96.0229	96.8082	96.9942	96.5691	96.9744	97.7894	97.9795	98.0936	98.1823	98.8307	98.2902	98.4893	98.3415	98.1185	98.2008	98.9958	98.6467	98.2743	98.1036	98.1759	98.1652	98.7683	98.8949
20	100	98.6366	97.7087	96.5856	95.9535	94.4057	93.8157	93.4418	92.105	91.674	91.1395	91.1101	90.7644	91.3875	90.9957	91.6641	91.9937	91.4082	91.1106	91.4198	90.374	90.242	89.8455	90.3286	90.0824	90.6835	90.6814	91.3808	91.5323	91.8283	91.9397	92.0219	91.7547	93.1365	93.3441	93.2207	93.9936	93.8916	93.7893	94.6946	94.8174	95.7515	96.464	96.2277	96.562	96.7616	97.1127	97.9362	97.6713
21	100	98.1791	97.2853	96.1715	94.7227	94.6822	94.2043	94.2235	94.0968	94.1286	94.4836	93.8679	94.0704	93.9526	93.6961	93.5651	93.2188	93.0278	92.7802	92.5035	91.8611	92.4296	92.398	92.9755	93.4211	93.6475	93.8822	94.2086	94.3883	94.5904	94.7209	94.6274	95.0319	96.0802	95.6073	96.4822	96.8542	97.0619	97.0952	97.8477	97.7598	98.3677	98.7096	98.4258	98.8063	99.4422	99.3947	99.4561	99.9027
22	100	98.3471	97.8135	96.7976	95.9936	95.146	94.6839	93.7519	93.7798	93.1525	92.3588	91.9449	91.8158	91.0843	91.0775	90.4635	90.0867	89.9206	89.4639	88.8827	88.2507	88.6003	88.7321	88.7984	88.5185	88.8897	88.0935	87.5372	87.6043	87.3684	87.1213	87.2031	87.1885	87.0116	87.0731	87.1338	86.8061	86.9392	86.371	86.4478	86.4064	86.118	86.3192	86.3441	86.28	86.4297	86.4929	86.2942	86.2576
23	100	98.9555	98.6683	98.4479	97.6413	97.9228	97.2819	97.089	97.1297	96.5906	96.6887	96.4488	96.654	96.7857	96.4358	96.29	96.5582	96.371	96.5519	96.8257	95.6161	95.9511	96.0609	95.73	95.4882	95.0207	94.9449	95.1549	94.498	94.3811	93.9126	93.4917	93.1412	93.1808	93.0689	93.1137	92.7025	93.0216	93.1149	93.1041	93.5131	93.3837	93.8113	94.0893	94.7757	94.4746	94.7014	94.3918	94.418
24	100	100.367	100.474	101.392	100.531	100.826	100.279	99.9434	99.6847	98.4427	97.9561	98.8535	98.0232	97.2446	97.4319	96.7581	96.2896	95.9794	96.5418	95.8202	95.7109	94.7819	94.3643	94.4028	94.3967	93.7961	93.5152	93.5237	92.198	93.2624	92.7677	92.8411	91.8218	91.44	90.9403	90.7226	90.7189	90.5142	90.9792	90.6411	89.8863	90.1448	89.652	89.546	89.241	90.1312	88.7648	89.3468	89.0919
25	100	99.0812	98.7705	99.0981	98.3128	98.5794	98.0919	97.1733	96.7652	95.9229	95.2651	95.0835	95.009	94.659	94.5579	94.1565	93.8809	93.4187	93.1815	93.2442	92.7125	92.3273	91.9492	91.8744	91.4868	91.4012	91.4174	90.9729	90.8072	90.9461	90.9833	90.9939	90.7828	90.5706	90.3211	90.5188	90.8434	90.312	89.9776	89.8558	89.8887	89.5616	89.701	89.7263	89.421	89.498	88.8528	89.1961	89.2775
26	100	99.5902	98.2179	97.5449	97.5388	96.9367	95.4386	95.9818	94.9318	94.551	94.1307	94.0719	93.7014	93.1634	92.2133	91.8958	91.1007	90.2975	89.5059	89.4677	89.4406	88.4612	88.8091	88.0224	87.7984	88.0961	88.6975	87.0995	87.164	87.2847	87.5669	87.4124	87.2005	87.0727	86.9675	87.0205	87.1839	87.3541	86.872	86.7088	87.2773	86.8991	87.6149	86.9881	87.4111	87.1347	87.3713	87.8815	87.3973
27	100	99.577	99.9563	100.991	101.278	100.956	100.995	100.888	100.25	99.9304	99.3285	99.1285	98.8657	98.6922	98.5793	98.8239	98.5737	98.0774	97.7364	97.1651	96.6775	96.2444	96.2585	96.1726	96.3636	96.0805	95.8879	95.7844	96.1587	95.4961	95.6395	95.632	95.5064	94.9963	95.0863	95.5929	95.2226	95.4347	95.482	95.576	95.6689	95.515	95.1906	95.2189	95.9287	95.5461	96.1131	96.2231	96.0312
28	100	100.268	100.276	99.9539	100.509	100.597	100.232	100.468	99.8734	99.6459	99.4411	98.7895	99.102	98.2845	98.3776	98.0275	97.2502	97.2222	97.1821	96.94	97.6275	98.1741	99.1862	99.121	99.5398	98.2078	99.0676	98.2686	98.0901	98.7363	98.6885	98.5698	98.7874	98.6463	98.9667	98.7093	98.6271	98.7784	99.1436	98.8322	98.4502	98.4866	98.5614	98.3979	98.3917	98.1048	98.1061	98.2985	98.1425
29	100	98.2253	96.552	95.1157	94.5165	93.4738	92.8105	91.8777	91.3455	90.666	90.6157	90.2478	90.5954	90.2866	90.0494	89.37	89.4622	89.0056	89.0663	88.6593	87.9472	88.3774	88.2159	87.9122	87.9712	88.3409	88.2471	88.9019	89.4197	89.2738	88.8102	88.4172	88.3638	88.9784	89.5316	89.6327	89.5554	90.1177	91.0624	90.5614	91.0512	90.9341	91.742	92.0816	91.9744	92.5273	92.7502	92.7371	93.7712
30	100	100.588	100.958	101.137	101.347	102.093	102.117	102.284	102.733	102.639	102.687	102.73	102.136	101.812	101.826	101.244	100.84	100.871	100.644	99.8373	99.9786	99.8382	99.7327	99.3595	98.9495	99.2645	98.9751	98.7971	98.3579	98.5467	98.193	98.2141	98.727	98.2693	97.9869	97.5129	98.1909	98.1997	98.0407	97.9116	97.5404	97.8944	97.6168	97.666	97.7592	97.7284	98.2869	98.3397	97.8131
31	100	100.426	100.745	101.153	100.461	100.277	100.423	99.9877	99.9464	99.817	99.2885	99.165	99.048	98.9928	98.7503	98.1413	98.6075	97.8879	98.2176	98.1488	97.8634	97.8075	97.645	97.4589	97.2429	98.1001	97.8364	97.2856	97.8745	97.6274	97.6573	97.7316	97.7101	97.9195	97.5651	97.7615	97.9722	97.7443	97.4929	97.43	97.396	97.4811	96.996	97.0425	96.5602	96.0893	96.4171	96.3704	96.0914
32	100	99.7681	99.9229	100.259	101.119	100.087	99.3319	98.7036	99.2823	99.1739	98.8809	99.1993	98.6693	98.5385	98.8449	99.5775	99.2368	99.4952	99.3885	98.1629	98.2582	98.2482	99.6118	98.8947	98.7458	98.5498	98.9078	97.8224	98.2312	98.45	97.5699	98.1548	97.8589	97.8924	98.1047	97.5801	98.1546	98.2129	97.6955	97.7157	97.9033	98.5447	98.194	98.9286	99.1006	99.0019	99.1877	99.3169	99.9114
33	100	99.0523	98.5047	98.5893	98.7524	98.6292	98.1666	98.0792	97.3431	97.7523	97.3428	97.6595	97.8014	97.2368	95.8921	95.9559	95.2871	95.557	95.0316	95.1209	95.2212	95.0571	94.7711	94.7731	94.1678	94.1513	94.3186	94.0311	94.8961	93.9849	93.728	94.8856	95.3423	95.0719	95.5021	96.2698	96.2611	96.4897	96.678	95.7909	96.3529	96.5706	96.1682	96.5633	96.4146	96.446	96.1388	96.5812	96.3223
34	100	98.3173	99.6458	99.259	98.7571	98.8924	98.3787	98.6008	98.3843	98.33	98.1823	97.879	98.0541	97.5952	96.9879	96.6377	95.7215	95.0682	95.0511	95.2046	95.1799	96.1724	94.7192	94.8752	94.8489	94.5851	94.6908	95.5318	95.3746	94.9409	95.2522	95.9379	95.5586	95.8654	95.7935	95.8299	96.2104	96.2256	96.65	95.9523	96.757	95.8544	96.2189	96.6649	96.2983	96.8748	96.8786	97.2012	96.8459
35	100	99.7834	98.5983	98.7909	97.399	96.2637	96.0327	95.4957	94.981	95.9934	95.9761	95.7716	95.6615	96.6272	97.0207	97.3105	97.6216	97.3799	97.0122	97.293	96.4045	96.9675	96.9349	96.5819	97.1065	96.5417	97.187	96.7895	95.882	98.0949	98.2893	97.3917	98.0689	98.2165	97.9885	98.6389	98.0476	98.4787	98.4168	97.843	99.2835	99.7175	99.7482	99.8849	100.151	99.8207	100.314	100.411	100.166
36	100	99.6122	99.1062	98.4467	97.5081	97.6755	97.4094	96.6504	96.8543	96.3637	96.1155	95.8121	95.0093	94.917	94.0317	94.6429	94.8015	94.2836	94.3885	94.1961	94.5594	93.9981	94.4052	94.9657	94.6361	95.2059	94.7074	94.0271	93.9471	94.3651	94.8469	96.1751	97.1247	96.8179	98.2363	98.0764	98.6207	99.2641	99.6157	99.7141	100.45	100.633	101.142	100.705	100.563	101.355	101.238	100.675	100.678
37	100	101.996	103.252	101.434	102.29	108.344	109.719	109.056	109.51	108.908	110.287	109.684	109.578	109.167	108.593	109.2	109.238	108.291	108.039	106.083	108.018	107.292	107.05	102.121	105.426	106.104	106.092	107.322	106.105	105.897	106.679	105.041	105.366	105.403	105.226	103.392	104.402	104.698	105.095	105.691	104.979	105.302	105.281	105.494	105.809	104.911	104.101	104.818	104.563
38	100	99.0252	99.3265	98.1233	97.9833	97.5617	96.9938	97.1406	96.8544	97.0187	96.3468	96.5236	96.3257	95.9269	95.7402	95.9463	95.4557	94.9987	94.736	94.925	95.0383	94.7687	94.3852	93.8515	93.7279	93.4676	93.3695	92.461	92.107	91.8489	92.0661	91.5375	91.5778	91.2087	90.8933	90.727	90.2211	90.4066	90.8934	89.9589	90.1412	90.2753	90.2132	89.9016	90.208	90.0466	90.0836	89.8147	89.8741
39	100	99.4342	99.1062	99.0356	99.1039	99.0064	98.9862	99.551	99.3426	99.5713	99.9692	99.7275	99.6921	99.3934	99.7878	100.292	99.9629	100.296	99.9519	99.5621	99.1601	99.5019	99.0499	99.1672	98.8949	98.9787	99.212	99.5376	99.937	99.9607	100.145	100.379	100.736	100.663	100.73	100.655	101.168	101.419	101.507	101.559	101.676	101.985	102.569	102.173	102.697	102.858	103.003	103.487	103.612
40	100	100.58	100.129	100.68	100.382	100.245	100.163	100.003	98.4591	99.1284	98.4861	97.3874	97.2338	97.9254	97.6057	97.5836	97.1894	96.916	97.0357	97.4569	96.7845	96.7213	96.7534	96.7444	96.1659	96.3316	96.2508	96.0457	96.0956	95.5652	96.4583	95.7333	95.9721	96.2013	96.6839	96.2547	96.6334	96.1324	95.6215	95.89	95.1221	95.5016	95.8181	94.4091	95.1298	94.2375	94.4924	94.5277	94.7182
41	100	99.6192	99.5812	99.2395	99.0749	98.464	98.6009	98.2511	97.6152	98.153	97.4687	97.4207	97.2746	97.3057	96.8565	96.2659	96.2949	95.4595	95.2392	95.0461	94.6507	94.3959	94.132	93.7056	93.85	93.1209	93.1609	92.886	92.4181	92.5067	92.247	91.8483	91.2756	91.4072	90.9943	91.3678	90.5798	90.6634	90.5765	90.1571	90.31	90.5345	90.8414	91.033	90.5785	91.2092	91.5378	92.1074	92.286
42	100	99.2435	99.7919	98.685	98.3395	97.4608	97.0474	96.9652	95.973	95.3204	95.0759	95.7255	95.021	94.5918	94.3933	93.8793	94.3905	93.7071	93.3039	92.7717	93.0237	92.2604	92.5964	91.5774	91.7193	91.7319	92.1443	91.6135	91.9094	91.3137	91.3923	91.0268	91.9411	92.0481	93.1665	92.3301	92.0997	91.5175	91.7872	92.1323	92.7859	91.5696	92.544	92.1203	92.0547	91.4882	91.5162	92.4359	92.2439
43	100	99.2346	99.2471	97.6197	97.6656	97.999	97.7836	97.3017	97.273	96.441	96.8424	96.7736	96.3984	96.0274	95.5482	95.5151	94.4637	94.1801	93.7623	93.016	93.2483	92.6889	93.2983	93.3465	92.1064	91.9306	91.0513	91.297	90.429	91.0907	91.448	90.7586	90.9647	91.4545	90.3733	92.2723	91.8216	91.4037	92.0047	92.6128	92.6487	92.8871	92.8312	92.7596	92.8865	93.8582	93.6941	94.07	92.9168
	100	99.6402	99.5019	99.1087	98.7705	98.6088	98.3324	98.083	97.6579	97.3538	97.0271	96.7053	96.4073	96.1558	95.8393	95.566	95.3052	94.9665	94.7096	94.5024	94.2924	94.2601	94.1968	93.983	94.0226	94.0314	94.0396	94.0049	93.9504	94.054	94.1264	94.185	94.3055	94.4561	94.5221	94.6554	94.8101	94.9707	95.1346	95.1994	95.3076	95.5138	95.6801	95.7382	95.8763	95.919	96.0607	96.2431	96.3544
	3.06479e-15	0.789157	1.27879	1.64841	2.0152	2.62754	2.94859	3.06705	3.20332	3.29383	3.52563	3.55912	3.64438	3.64857	3.82342	3.92993	3.96399	4.03913	4.10932	4.04566	4.28754	4.29775	4.43781	4.21273	4.46575	4.50054	4.56065	4.70378	4.67884	4.76501	4.87298	4.8838	5.07916	5.05348	5.15608	5.10252	5.29381	5.46679	5.46986	5.59368	5.54593	5.71631	5.7368	5.75172	5.77521	5.74838	5.68381	5.68988	5.72389
[truncated: 2 more columns]

## Sheet: Area_SlowSpreading
Cell\Time	1	2	3	4	5	6	7	8	9	10	11	12	13	14	15	16	17	18	19	20	21	22	23	24	25	26	27	28	29	30	31	32	33	34	35	36	37	38	39	40	41	42	43	44	45	46	47	48	49
1	13.3128	38.5863		58.0355		76.5486		86.6372		97.9739		136.664		145.713		170.258		191.892		224.237			226.734			246.391			258.664			315.243		284.769			269.376		253.983			302.45				284.353
2	39.8344		58.7635		87.8853		98.3899		109.831	117.839	132.296				185.131						221.013						262.408					309.523						360.486					407.392
3	21.113	35.258	44.203	52.107	58.764	71.348	81.333	79.461	91.942	100.262		108.791	132.4	169.842	159.858	161.21		164.122	197.716	222.053	253.567	236.198	247.015	237.654	264.28	273.64	282.481	287.369	300.058	316.595		325.124	330.116	337.084	306.922	319.923	320.547			339.06		346.965		344.157		351.957		369.43
4	14.353	31.618	52.835	63.444	83.725	85.389	94.126	97.142	91.734	100.158	105.254	103.798	108.375	112.327	122.207	120.439	124.599	124.495	123.143	142.489	142.177		164.85		150.809		165.994		173.69		175.355		196.052		186.171		206.764		206.14		205.308		209.677	200.836	221.533		207.18		221.741
5	25.898	43.163	47.635	41.498	54.707	68.54	73.116	88.821	95.79	107.126	107.75		115.863	125.536		159.754	216.125				281.961		313.475	333.34	348.421	324.812	360.694	368.806	392.104	443.691	409.369			460.748		518.367	491.846				523.151		510.879		563.922	559.346		538.336
6	40.666		55.435	66.044								165.266				192.724	206.66	209.053			234.43			262.304		275.201				296.938								312.331							315.867		353.101	363.19
7	33.074				46.8028		74.8845			105.046			179.411			266.568			305.05			331.988			395.952			402.192				442.235			427.258					454.299					500.582
8	21.3213		47.9469			63.2358		74.3645		100.262		139.056				141.24							152.265			164.642			205.724				257.103				277.385			332.82					346.029
9	11.4407	19.3452		30.3698	31.6179	56.9954		67.292		78.5247		98.9099		128.864			255.231	292.362		394.808		436.618			448.787					470.836					539.48			575.363		611.245					648.999
10	55.7473	73.7404	74.2605	89.2374		107.022			118.879			130.008			169.946				214.981			228.398			313.787			366.31					395.536				396.576			375.775			404.896					364.542
11	25.378	53.771	69.996	55.435	91.109	76.861	106.294	114.095	101.822	105.878	109.103	93.398		138.12		176.395			159.13		143.113	165.266		158.922	191.788		177.851		232.246	203.852	197.196		228.606		203.852		221.013		216.645		219.141		208.221		224.237		201.564		220.805
12	24.233	24.857	35.466	39.73	56.891	63.028	79.877	79.565	76.861	96.622	90.173	87.157	91.838	97.87	121.999	107.126	121.999	133.232			131.88	120.023	135	144.569	157.569	179.515	177.435		184.507	177.227	188.771		181.283		186.587		205.516		197.404		222.885	202.084	196.26	218.621	225.174		205.1	211.445
13	44.619	68.852	92.566	104.006	122.103	104.422	103.694	111.807	126.68		139.992	162.978	181.595	234.534	194.596			242.647	319.403	386.903	358.302		369.118		400.112		373.07		397.096	412.489	423.513		390.439		370.574		409.369		390.855		425.49		429.858		399.696		430.586		449.099
14	6.34438	15.8089	27.5617	34.2181	50.339	51.0671	63.1318	59.0755	67.5001		83.309		96.6218		94.8537		120.647		141.448		140.72		163.81		144.361				182.739				202.5		255.751				231.934					234.43			205.1
15	55.1233		73.0124		73.8444		100.886		104.11		134.792		147.481			128.76	165.37					247.847			247.015						269.064					252.423						219.765				245.455
16	28.602		58.348	66.252	56.163	69.372	73.948		92.67		106.71		108.895		164.018		161.314		194.388	252.735			226.214	278.425	320.547		312.331		323.979		320.651		332.924	334.38	316.595	329.7	309.835		310.563	336.46			333.028		337.396		323.667		331.676
17	35.4661	28.7057		48.2589				65.0039		77.7967	114.511								248.679						314.411					397.824					469.38					506.302					569.018
18	56.995	62.924	66.356		83.725		90.277		97.246		133.128				291.322	282.897	346.861		350.917		356.429		381.703		443.691		450.659		466.364		435.994		474.477		471.772		464.492		440.362		470.004		458.668		445.875		465.844		503.078
19	14.5609	27.5617		44.2027		59.5956		64.0679		75.8206		83.621	109.103						170.674				184.923								248.887						265.944						295.586
20	36.922	53.043	64.276		80.397	90.901	89.445	92.15	93.19	108.895	106.086	116.279		118.879		119.815		117.943		129.488		126.368		132.088		142.593		144.049		160.274		144.257		169.946		168.49		188.147		198.756		194.18		190.123		219.245		205.828
21	20.281	41.498	43.267	56.059	63.444	77.797	70.1		74.676	90.277	89.653		86.221	165.058	163.602	209.781	243.271	214.981	205.828		276.969		267.608	293.09		288.721	325.852		309.627		342.805		334.068		347.901		351.957		328.764		354.973		374.006		362.254		398.136		408.225
22	23.089	34.114	51.275		53.771	61.988			64.068	93.19				97.246	105.462	150.185		170.882		177.643		208.533			254.087			292.258		324.604	349.877		342.389	380.351	406.04				417.273		435.162	464.804	478.013	447.955			471.356		464.908
23	50.443	61.78	69.788	71.868	88.197					105.878									228.502				251.383	252.111		257.623				249.407		273.952			282.897		266.984		279.673	255.647			279.361	275.617	295.898	278.945		291.322	302.242
24	19.5532		23.0894		36.5062		55.1233		54.6033	67.6041	80.6048		87.5733		84.4531					143.321				165.786				165.578						190.227					227.254					259.288
25	43.4746		31.4099		45.7627		61.0517				95.9978			108.166		110.247		142.489		166.306		217.165			263.552		257.415		284.769		316.075		312.435		336.356							315.035					401.984
26	19.9692	23.9214	40.0424		45.0347		50.651		68.8521								103.694					141.24			205.412						265.424							301.41							349.669				368.078
27	6.96842			6.96842					47.8429					53.1472				94.0216						107.854				120.543				165.89			162.978					209.261						226.526
28	5.82435			17.369				42.6426				43.0586		61.1557			76.6526			95.5817			105.67		129.488			148.417			191.371			226.318				291.113				265.424			331.26
29	12.2727		18.6171	27.1456	36.7142	38.8983	39.2104	34.9461	51.3791	67.3961															69.2682					84.2451								121.791							110.247
30	76.861		87.157		86.533	113.783	86.741				130.424		159.338	187.731	191.58		301.618	273.64	305.362		326.06		335.94		367.038		369.638		439.218		422.993		432.25		490.077	562.57		547.801		532.72	509.111		556.953	603.34	562.154		564.858		626.118
31		4.78429		9.25656		20.6972		32.3459		39.9384		47.5309		55.3313		66.252		75.1965		98.3899		137.392		148.313		207.596		234.95				262.2					273.952				289.033		307.078			325.124
32	8.52851	27.3536				36.1942						59.4916			67.084			101.094		202.708					208.845					231.622					258.56					302.138						308.223
33	20.489	21.841	28.394	34.114	39.626	32.45	40.042		67.708		58.66	55.123		82.789	100.054		90.693	117.839			137.808	160.17	159.442	168.594	158.402	164.122	185.547	168.074	172.546	175.459	164.538	189.707		166.93	192.932		195.532	219.765		196.468	194.908		213.941	221.533			202.188		195.636
34	19.137			32.658	40.25		48.467		60.428	58.66	55.019	52.211	63.028			70.1		80.709	97.142		102.654		100.574		138.328		119.087		140.928		144.673	132.712	124.079	143.529		126.472			132.608		135.728		124.599	132.816	150.705		143.529		159.442
35	34.6341	46.3868		64.8999		78.7327		62.4038		76.2366						126.472				169.114					201.98					216.021						246.599					281.441		280.245			279.049
36	23.9214						47.3228					64.0679		83.101		140.512		144.673			128.968					176.499					196.676						215.709
37	14.7689		22.7774			25.0655		42.5386			52.3151		53.9792				86.0132										197.924							201.772						200.108					221.013
38	16.329	15.4969		20.1772			37.5463					87.4693					103.07				139.264				161.002					184.923			194.596					229.854			214.877					259.912
39	23.5054						45.2427			52.2111			81.3329				190.643							219.557									272.184							278.217						302.658
40	73.012	94.126	88.925		94.75	91.109		92.67		105.566	122.519		114.927	129.8		144.985			180.867			206.868	236.094		180.763	298.082	285.913			295.378		308.691		287.473		284.873			271.768		277.905		297.666		194.388		172.962
41	12.3767							40.4584			42.0705					43.6826		51.6911			90.9015				131.36					292.778					351.021					419.353		450.295			481.237	490.493	479.989	435.37	402.92
42	19.865	23.713	31.826		39.106		36.506				48.571		53.667				63.964			70.62		81.333		96.102		104.942		96.102	117.839	110.039		145.713				168.698		175.979			185.027			166.618
Average	28.0563	38.89	52.0455	47.2231	63.3757	67.5434	69.8963	71.3744	83.7054	88.2244	97.2245	96.5726	109.536	120.801	147.744	147.114	165.468	154.893	215.202	191.76	203.895	203.027	223.434	199.914	244.854	221.741	269.019	232.887	269.535	265.484	281.291	251.27	294.179	265.294	328.155	297.811	302.517	302.185	278.945	346.789	309.009	306.778	335.07	274.611	357.143	317.791	326.697	347.433	357.998
	17.3217	20.7742	20.7781	23.4513	22.9432	24.5312	22.3368	23.972	21.9481	20.1701	29.8161	36.9848	37.4619	45.5784	55.3602	57.2809	79.526	65.8738	71.4846	92.2946	87.7885	87.2381	83.3063	70.4649	103.799	64.8631	90.109	102.684	103.768	107.581	96.5336	91.7736	95.1593	94.4373	110.466	137.058	88.9537	138.852	86.1883	124.479	122.235	94.3939	116.159	127.508	146.054	96.264	131.096	104.22	131.349
[truncated: 2 more columns]

## Sheet: Volume_SlowSpreading
Cell\Time	1	2	3	4	5	6	7	8	9	10	11	12	13	14	15	16	17	18	19	20	21	22	23	24	25	26	27	28	29	30	31	32	33	34	35	36	37	38	39	40	41	42	43	44	45	46	47	48	49
1	1555.87	1553.84	1544.81	1528.97	1522.12	1501.59	1498.95	1489.55	1482.05	1476.62	1479.36	1472.95	1475.81	1462.23	1459.93	1455.91	1443.92	1442.29	1431.65	1426.62	1422.15	1431.45	1417.92	1420.9	1411.74	1410.03	1404.01	1403.74	1402.03	1394.16	1389.67	1393.02	1389.87	1389.7	1393.98	1385.71	1380.96	1399.53	1391.16	1401.42	1402.76	1401.33	1398.4	1408.77	1416.99	1413.68	1427.45	1427.65	1429.52
2	1866.26	1873.32	1895.63	1906.8	1919.21	1940.86	1947.5	1946.42	1965.68	1960.69	1984.47	1993.02	1995.02	2005.41	2003.14	2024.77	2036.2	2043.49	2044.89	2063.81	2061.49	2066.06	2065.54	2072.3	2077.77	2091.02	2089.32	2092.36	2097.57	2094.98	2083.21	2085.78	2082.31	2084.08	2071.83	2080.31	2080.3	2086.78	2082.12	2079.32	2087.34	2081.69	2080.79	2078.62	2071.4	2066.45	2045.76	2058.42	2068.93
3	1520.31	1506.59	1511.23	1506.89	1498.54	1481.95	1486.59	1469.82	1464.87	1459.22	1447.73	1446.83	1440.35	1429.46	1422.72	1414.86	1403.93	1397.77	1385.23	1386.54	1389.17	1384.69	1375.29	1372.65	1368.79	1372.15	1366.97	1357.04	1350.23	1349.84	1348.03	1344.91	1347.01	1346.54	1355.66	1343.97	1342.41	1344.15	1347.64	1340.04	1349.82	1350.42	1345.31	1350.66	1357.59	1358.43	1360.63	1361.98	1370.26
4	1825.97	1792.92	1791.96	1788.06	1782.99	1784.34	1769.92	1769.1	1775.63	1757.22	1768.82	1745.13	1739.46	1732.92	1730.94	1718.01	1723.55	1718.59	1715	1717.99	1697.53	1700.67	1703.19	1710.75	1697.18	1689.96	1683.51	1686.47	1685.12	1685.64	1702.2	1690.42	1687.3	1689.01	1684.49	1683.65	1690.74	1680.55	1688.29	1674.86	1675.55	1674.99	1672.39	1670.94	1680.44	1683.75	1678.26	1674.46	1672.42
5	1597.72	1591.15	1590.1	1571.73	1577.97	1570.35	1563.14	1558.2	1563.29	1554.29	1553.64	1547.78	1541.56	1527.11	1537.53	1515.48	1520.83	1523.23	1506.81	1500.5	1490.05	1483.53	1473.21	1476.85	1476.63	1470.73	1476.09	1469.24	1456.92	1456.73	1459.3	1459.02	1453.47	1450.77	1457.07	1454.61	1456.01	1462.58	1458.01	1452.84	1451.44	1467.74	1462.26	1463.43	1463.32	1474.54	1473.83	1472.4	1468.03
6	1454.76	1457.8	1432.64	1430.67	1424.13	1413.92	1399.69	1384.6	1379.53	1369.73	1373.33	1369.03	1359.72	1363.27	1359.8	1366.78	1367.64	1365.46	1357.52	1350.56	1343.86	1336.93	1330.42	1321.14	1330.26	1332.51	1333.34	1328.57	1329.31	1324.46	1322.89	1331.82	1333.42	1330.34	1334.15	1331.93	1325.38	1325.87	1321.43	1319.36	1329.91	1325.8	1323.98	1333.41	1328.05	1326.4	1317.39	1327.03	1318.31
7	2008.32	1986.5	1984.5	1964.32	1954.59	1951.38	1938.47	1938.75	1949.19	1936.14	1942.25	1928.19	1928.08	1908.54	1919.29	1907.99	1916.71	1909.53	1894.75	1877.59	1870.49	1868.55	1870.07	1854.97	1856.5	1848.63	1835.33	1825.45	1819.88	1820.28	1828.96	1820.44	1815.26	1812.83	1814.72	1817.83	1817.2	1815.4	1807.44	1818.92	1820.81	1817.97	1822.9	1822.65	1829.99	1824.64	1829.34	1840.52	1842.72
8	1602.04	1595.06	1604.13	1597.1	1591.67	1598.27	1592.82	1588.13	1583.77	1582.81	1576.61	1584.14	1579.44	1564.89	1563.51	1557.63	1558.21	1561.64	1565.71	1561.61	1574.49	1580.7	1583.69	1584.42	1593.01	1595.78	1601.68	1604.95	1601.22	1603.47	1614.47	1625.62	1619.12	1628.63	1625.77	1633.74	1641.77	1639.8	1626.2	1616.69	1601.31	1600.07	1610.69	1597.89	1598.26	1593.33	1582.13	1584.43	1585.05
9	2231.74	2226	2241.53	2244.34	2264.63	2278.5	2272.39	2276.13	2280.75	2280.06	2281.28	2288.42	2253.35	2251.15	2232.99	2221.75	2221.55	2218.54	2210.58	2198.73	2195.98	2187.67	2187.05	2185.47	2175.84	2172.07	2172.71	2178.87	2172.81	2168.35	2165.52	2164.98	2164.82	2164.33	2162.45	2170.51	2157.43	2153.59	2155.65	2161	2161.24	2175.74	2167.2	2178.02	2180.13	2173.76	2185.81	2178.15	2181.09
10	2468.59	2450.79	2485.26	2483.63	2473.88	2473.71	2476.29	2479.24	2477.26	2473.13	2454.75	2458.5	2459.67	2449.43	2453.04	2442.01	2428.1	2430.14	2424.62	2428.89	2422.94	2421.8	2423.44	2415.36	2411.14	2409.46	2421.35	2405.26	2414.99	2410.83	2407.14	2407.07	2406.92	2405.57	2398.69	2409.14	2399.86	2403.57	2400.52	2402.49	2393.99	2395.84	2393.34	2398.25	2387.05	2396.6	2396.09	2395.44	2385.62
11	2367.96	2388.12	2403.4	2411.46	2422.14	2419.5	2427.02	2436.31	2432.16	2426.91	2422.77	2410.76	2397.33	2395.4	2391.39	2364.98	2355.63	2356.41	2354.96	2348	2345.56	2335.25	2330.79	2329.22	2317.52	2316.29	2314	2312.75	2312.05	2323.51	2312.96	2317.41	2312.11	2321.64	2324.33	2319.68	2314.59	2319.36	2311.48	2315.26	2324.42	2328.64	2322.8	2333.25	2334.96	2335.83	2343.16	2334.5	2355.08
12	1430.39	1421.86	1428.17	1410.86	1411.77	1392.32	1384.41	1389.61	1376.04	1374.79	1369.64	1371.65	1384.57	1381.03	1372.71	1371.68	1370.12	1359.06	1367.86	1355.44	1349.91	1346.26	1342.4	1340.82	1333.94	1334.42	1333.84	1331.78	1335.3	1329.28	1328.36	1331.32	1322.54	1326.93	1325.2	1326.79	1315.24	1325.02	1315.45	1310.47	1306.7	1299.77	1303.81	1300.69	1303.1	1308.97	1301.76	1298.87	1310.27
13	2593.77	2629.53	2655.37	2680.61	2683.62	2693.09	2700.03	2705.81	2705.15	2711.39	2702.66	2705.23	2695.28	2694.78	2673.19	2671.22	2648.3	2636.48	2624.28	2614.66	2592.81	2592.19	2582.2	2571.67	2561.74	2555.04	2542.66	2539.15	2534.63	2535.33	2522.05	2512.87	2504.3	2490.61	2489.35	2489.4	2489.58	2479.97	2482.85	2496.99	2487.9	2486.92	2482.67	2479.2	2467.51	2469.95	2454.36	2458.83	2463.53
14	2461.14	2465.52	2448.9	2447.72	2442	2438.26	2430.41	2436.03	2441.51	2436.77	2441.02	2434.51	2418.17	2406.77	2413.12	2408.66	2410.65	2400.19	2388.25	2382.69	2378.89	2380.17	2361.4	2358.35	2367.32	2358.64	2349.17	2347.6	2356.39	2337.14	2342.32	2335.24	2326.62	2344.99	2336.34	2325.27	2327.1	2317.88	2329.79	2315.28	2326.33	2333.03	2331.25	2341.64	2361.64	2375.27	2374.85	2380.27	2384.45
15	1864.27	1866.64	1874.38	1890.89	1887.4	1902.66	1906.11	1910.62	1908.63	1899.6	1896.3	1898.68	1892.34	1891.56	1900.42	1877.32	1879.67	1871.14	1876.56	1866.75	1866.7	1864.27	1857.3	1851.57	1850.35	1883.5	1841.58	1846.22	1854.51	1849.67	1850.58	1862.37	1852.78	1855.15	1853.73	1865.39	1863.63	1866.77	1872.22	1874.46	1873.04	1875.56	1894.52	1872.76	1882.84	1885.44	1881.08	1885.89	1889.86
16	1500.64	1512.26	1511.57	1520.12	1526.51	1515.7	1503.76	1503.79	1500.73	1494.22	1483.74	1465.83	1455.15	1441.77	1435.73	1428.57	1427.31	1428.26	1422.12	1419.04	1418.25	1406.68	1413.73	1411.05	1409.03	1403.04	1404.31	1399.64	1403.79	1396.63	1392.37	1396.17	1399.43	1392.11	1397.35	1392.92	1397.77	1395.03	1396.88	1395.19	1394.26	1394.84	1399.62	1402.94	1403.03	1401.47	1402.54	1401.91	1399.31
17	2455.18	2424.69	2417.29	2394.82	2404.5	2383.25	2397.44	2402.27	2407.41	2392.76	2387.82	2388.93	2386.88	2393.93	2381.88	2375.51	2377.02	2366.15	2370.94	2364.23	2355.88	2347.8	2349.89	2337.66	2342.19	2332.46	2334.5	2324.21	2313.65	2311.39	2306.45	2292.14	2290.4	2281.06	2270.75	2271.21	2258.51	2255.19	2248.69	2242.96	2230.69	2241.01	2243.5	2240.9	2250.15	2249.83	2237.74	2251.73	2234.9
18	1507.67	1530.71	1516.76	1520.12	1514.74	1519.39	1508.9	1507.66	1510.04	1512.26	1505.34	1494.84	1491.08	1484.33	1466.32	1461.36	1443.86	1449.42	1435.46	1424.95	1422.1	1415.47	1410.65	1411.54	1412.25	1409.89	1402.05	1401.45	1402.58	1401.1	1397.05	1397.06	1403.12	1395.69	1400.88	1394.09	1394.58	1397.16	1405.9	1396.77	1401.36	1392.81	1397.31	1402.09	1393.94	1403.11	1390.69	1387.6	1386.42
19	3195.67	3151.88	3102.83	3073	3053.31	3034.92	3008.71	3002.04	2980.58	2966.6	2947.77	2946.11	2960.55	2947.83	2938.95	2939.55	2957.53	2943.62	2937.22	2940.93	2928.06	2927.78	2912	2910.06	2906.61	2891.04	2883.83	2881.83	2864.03	2857.91	2868.68	2864.36	2861.88	2866.3	2862.94	2852	2845.14	2843.02	2836.66	2840.34	2843.06	2832.91	2826.63	2822.35	2807.59	2806.31	2807.06	2796.87	2803.43
20	1870.3	1861.76	1850.96	1846.22	1828.17	1829.5	1829.06	1809.98	1802.11	1798.84	1789.26	1782.59	1770.73	1776.21	1760.33	1755.4	1759.97	1749.37	1744.02	1745.12	1747.98	1744.02	1731.44	1742.16	1739.24	1735.12	1732.25	1740.73	1727.51	1732.87	1729.59	1721.35	1732.4	1734.76	1730.24	1744.19	1750.07	1749.93	1752.83	1758.92	1760.49	1773.19	1767.16	1792.45	1779.36	1781.81	1801.3	1805.92	1812.4
21	2109.67	2034.19	2021.94	1999.06	1977.78	1959.64	1949.35	1941.2	1952.09	1923.35	1927.26	1904.52	1904.69	1889.98	1901.75	1896.7	1900.75	1889.81	1890.66	1884.02	1885.27	1884.81	1873.43	1890.29	1884.11	1864.86	1870.7	1865.19	1861.45	1850.43	1837.86	1837.17	1835.59	1839.6	1831.76	1835.31	1828.32	1835.62	1841.31	1837.88	1839.6	1846.94	1845.26	1850.45	1855.16	1855.3	1849.68	1852.29	1868
22	1957.73	1954.37	1947.36	1926.92	1935.61	1918.43	1915.2	1906.56	1902.5	1882.67	1888.32	1871.94	1870.78	1870.08	1859.96	1860.07	1855.01	1860.17	1861.49	1852.27	1849.27	1856.05	1849.02	1849.71	1840.04	1841.18	1858.51	1856.83	1860.16	1862.31	1871.14	1865.71	1888.94	1885.53	1887.95	1900.38	1917.1	1924.78	1936.36	1941.2	1947.18	1961.98	1951.98	1967.97	1974.79	1983.93	1978.48	1987.21	1983.76
23	1655.06	1645.12	1625.8	1613.33	1608.28	1606.46	1593.08	1591.05	1572.49	1568.68	1571.83	1555.19	1559.46	1549.14	1542.21	1544.04	1530.37	1535.15	1522.58	1529.81	1522.83	1522.38	1508.08	1502.14	1507.07	1516.38	1515.54	1515.89	1510.22	1516.34	1505.71	1509.75	1502.24	1502.76	1505.71	1510.72	1504.96	1516.89	1529.83	1542.43	1571.76	1586.95	1601.53	1611.58	1625.98	1642.63	1648.95	1670.35	1664.89
24	1465.72	1446.74	1433.6	1422.76	1420.16	1417.33	1415.64	1416.6	1416.51	1414.98	1411.88	1419.46	1423.26	1420.38	1417.13	1424.93	1414.99	1419.62	1416.67	1416.16	1410.46	1414.13	1410.82	1412.42	1415.28	1410.77	1409.27	1421.22	1423.09	1415.05	1423.55	1420.33	1419.53	1421.47	1420.96	1431.14	1417.14	1413.95	1417.99	1404.29	1401.69	1412.88	1417.47	1416.16	1417.96	1415.59	1414.39	1410.04	1408.94
25	1991.9	1986.7	1985.52	1993.23	1991.06	1976.39	1988.04	1984.41	1985.62	1984.5	1991.01	1991.25	1979.64	1989.45	1984.16	1975.62	1970.24	1961.94	1970.73	1963.06	1962.71	1961.29	1960.32	1943.54	1943.93	1925.1	1938.99	1932.84	1940.73	1920.85	1927.63	1912.81	1907.21	1908.28	1909.03	1920.79	1917.39	1914.18	1914.92	1916.59	1926.46	1924.64	1922.66	1927.78	1938.65	1955.31	1960.76	1964.77	1990.77
26	1903.85	1898.59	1893.41	1893.31	1888.36	1888.25	1886.54	1883.47	1870.84	1870.93	1875.07	1868.39	1871.27	1870.88	1869.93	1869.97	1860.74	1865.95	1859.41	1872.2	1864.77	1865.02	1862.12	1854.11	1854.41	1850.76	1846.31	1851.9	1840.98	1840.39	1838.47	1824.06	1814.19	1814.81	1811.33	1811.07	1796.4	1787	1793.01	1794.05	1789.58	1781.05	1778.24	1769.61	1771.94	1771.98	1770.56	1759.79	1758.23
27	2143.7	2155.32	2163.77	2178.18	2171.03	2182.07	2187.85	2195.26	2208.67	2219.06	2222.28	2228.16	2232.57	2255.23	2264.19	2254.14	2259.92	2263.9	2273.46	2266.06	2274.63	2265.29	2273.98	2278.81	2272.36	2275.4	2279.33	2293.48	2296.97	2296.55	2295.97	2282.21	2296.75	2303.71	2300.5	2302.12	2298.84	2302.77	2305.12	2294.06	2299.7	2287.54	2292.31	2302.68	2308.53	2312.73	2297	2295.84	2291.33
28	1218.55	1205.59	1214.5	1219.27	1201.99	1210.53	1207.47	1210.68	1213.29	1202.89	1199.89	1210.66	1208.52	1200.83	1215.66	1217.12	1210.02	1218.29	1218.56	1220.5	1221.64	1234.5	1226.58	1228.15	1238.2	1244.06	1243.54	1244.32	1252.64	1256.7	1257.91	1260.39	1256.64	1271.16	1262.62	1262.32	1261.5	1263.3	1258.93	1270.59	1271.08	1263.56	1266.37	1248.68	1253.75	1244.15	1250.93	1231.58	1240.98
29	1159.62	1157.76	1145.76	1148.27	1154.87	1141.48	1150.55	1155.36	1135.57	1148.53	1152.59	1147.58	1140.25	1140.25	1152.16	1143.21	1129.94	1133.05	1140.3	1148.16	1143.77	1137.67	1139.41	1135.03	1136.03	1124.76	1135.52	1135.18	1105.98	1118.09	1119.47	1123.27	1111.55	1111.53	1111.07	1111.02	1106.79	1107.81	1105.72	1110.27	1113.51	1109.24	1108.62	1109.47	1104.07	1099.81	1090.75	1096.18	1101.78
30	2394.05	2405	2407.23	2431.13	2438.12	2453.2	2458.34	2462.47	2455.26	2461.52	2453.27	2448.79	2447.12	2455.87	2446.07	2436.93	2425.22	2411.2	2399.35	2396.06	2389.31	2378.17	2364.61	2357.86	2334.45	2327.37	2312.36	2300.87	2275.94	2278.58	2267.75	2257.16	2247.1	2248.86	2252.84	2239.86	2241.43	2250.15	2245.28	2247.77	2249.82	2240.19	2230.41	2235.23	2221.56	2217.92	2213.8	2215.09	2208.27
31	1688.61	1675.39	1659.53	1650.73	1633.38	1639.06	1617.27	1620.93	1607.51	1608.08	1606.74	1596.38	1602.29	1600.95	1584.98	1594.89	1573.98	1569.32	1578.62	1564.87	1563.56	1558.3	1559.81	1543.03	1536.97	1538.66	1533.47	1530.35	1519.59	1526.38	1514.19	1522.04	1507.7	1507.98	1497.23	1489.25	1507.05	1495.93	1499.25	1497.84	1493.46	1484.87	1481.76	1486.65	1488.12	1489.75	1492.26	1498.41	1501.46
32	1527.44	1516.88	1504.55	1519.95	1508.53	1501.44	1485.73	1477.39	1471.06	1476.36	1459.52	1459.16	1454.75	1437.39	1433.76	1431.39	1433.77	1419.84	1416.13	1410.89	1395.19	1406.52	1406.16	1389.03	1396.15	1380.03	1378.18	1380.65	1368.3	1353.99	1357.21	1347.65	1339.58	1349.41	1345.79	1336.54	1326.36	1321.78	1319.57	1317.17	1308.13	1312.17	1300.96	1306.38	1305.6	1294.6	1297.64	1307.18	1309.85
33	1630.6	1613.57	1596.12	1590.58	1578.66	1570.76	1570.14	1564.93	1569.79	1573.09	1564.55	1572.53	1575.4	1575.41	1581.59	1584.47	1585.42	1596.26	1588.02	1588.54	1594	1591.66	1605.11	1598.64	1598.67	1611.51	1604.5	1607.62	1600.24	1603.6	1592.6	1582.04	1572.28	1568.49	1565.76	1559.44	1555.57	1566.49	1562.51	1569.66	1572.07	1560.3	1554.86	1551.46	1547.93	1554.95	1554.88	1545.3	1542.2
34	1324.47	1336.68	1345.75	1356.99	1358.07	1357.92	1367.84	1377.84	1382.26	1391.95	1380.64	1383.38	1384.49	1387.21	1385.08	1378.56	1369.99	1373.25	1359.69	1363.77	1369.27	1368.55	1369.8	1350.23	1344.5	1338.61	1341.93	1337.2	1326.92	1321.83	1334.92	1332.38	1339.98	1335.71	1345.57	1345.42	1336.81	1329.18	1333.43	1340.48	1339.43	1332.56	1331.58	1324.58	1331.49	1329.93	1331.96	1332.82	1323.24
35	1898.41	1904.8	1906.6	1899.17	1888.92	1881.78	1877.99	1865.48	1864.24	1866.98	1860.31	1853.92	1855.19	1837.39	1839.57	1826.68	1819.05	1826.59	1829.19	1830.34	1826.98	1815.58	1816.56	1828.43	1817.41	1813.15	1818.92	1803.12	1799.88	1804.59	1797.54	1784.89	1796.1	1793.9	1788.62	1787.25	1776.34	1772.21	1772.82	1774.98	1766.9	1772.41	1762.11	1764.86	1767.99	1776.17	1780.27	1789.15	1781.44
36	1050.86	1041.94	1053.46	1055.45	1057.38	1063.4	1074.97	1066.07	1071.43	1067.95	1074.38	1082.58	1088.91	1081.39	1087.09	1090.92	1089.38	1089.58	1092	1092.85	1091.02	1088.9	1092.82	1086.67	1096.53	1104.69	1108.99	1090.25	1093.63	1082.75	1102.82	1099.71	1105.01	1112.57	1102.02	1095.98	1104.75	1100.63	1091.77	1087.67	1090.25	1090.42	1091.09	1095.74	1103.93	1102.19	1087.22	1092.82	1082.19
37	1516.06	1516.34	1508.7	1511.23	1506.89	1507.1	1505.48	1500.6	1495.64	1498.73	1499.87	1495.26	1491.08	1490.34	1490.1	1490.18	1491.15	1487.43	1484.86	1478.97	1480.46	1480.77	1473.8	1466.9	1476.47	1458.36	1468.67	1470.01	1451.45	1484.06	1478.5	1483.97	1477.24	1488.2	1486.49	1499.4	1499.73	1507.13	1530.18	1528.18	1534.33	1545.83	1559.04	1563.08	1581.21	1586.08	1585.91	1610.51	1604.77
38	1505.82	1500.66	1502.26	1523.2	1521.14	1517.34	1509.98	1517.74	1515.9	1519.62	1519.49	1526.15	1526.45	1532.61	1532.32	1532.43	1525.86	1532.78	1536.83	1543.35	1544.42	1545.86	1546.15	1541.24	1536.67	1524.94	1543	1545.25	1553.69	1551.08	1569.38	1571.56	1564.59	1570.2	1564.21	1568.22	1559.01	1559.11	1543.36	1553.73	1547.14	1559.05	1535.51	1552.98	1560.59	1553.4	1551.49	1550.52	1545.1
39	1982.7	1971.65	1946.01	1936.81	1926.57	1914.3	1891.25	1894.17	1874.12	1876.94	1869.76	1870.22	1860.54	1863.49	1862.54	1839.34	1860.14	1837.78	1833.67	1827.59	1814.75	1815.92	1808.59	1800.08	1804.75	1799.82	1791.18	1791.16	1776.26	1780.78	1772.8	1767.92	1762.25	1766.77	1760.97	1766.65	1756.77	1753.98	1750.36	1743.67	1746.44	1738.37	1729.63	1731.24	1732.43	1737.12	1736.65	1729.26	1725.96
40	1867.27	1855.57	1851.02	1850.71	1856.62	1852.41	1856.17	1852.08	1863.04	1864.76	1867.04	1880.76	1876.1	1873.5	1875.99	1882.96	1880.32	1886.31	1881.87	1903.96	1892.13	1894.27	1913.69	1906.2	1912.05	1914.07	1920.86	1927.1	1930.52	1933.15	1943.98	1935.85	1945.08	1941.71	1953.76	1967.95	1963.78	1970.94	1983.76	1986.76	1987.4	1993.56	2010.81	2013.83	2030.55	2045.7	2044.65	2054.42	2067.33
41	1946.43	1934.36	1920.62	1911.93	1935	1909.1	1913.98	1919.42	1923.88	1914.33	1917.75	1912.46	1917.92	1905.41	1904.62	1897.54	1900.63	1899.41	1885.34	1886.75	1875.66	1869.8	1857.26	1862.16	1868.07	1859.43	1848.17	1851.06	1835.65	1826.99	1824.07	1825.43	1818.28	1821.07	1815.72	1816.01	1802.97	1798.27	1797.71	1800.46	1803.32	1785.87	1794.53	1797.61	1795.67	1801.53	1803.52	1815.45	1812.99
42	1638.48	1647.36	1645.93	1641.45	1639.64	1637.32	1624.86	1616.57	1615.18	1600.2	1589.59	1598.08	1578.58	1587.61	1574.66	1596.4	1609.04	1618.91	1628.26	1655.56	1656.61	1685.04	1685.44	1683.14	1699.89	1695.83	1699.09	1696.73	1687.99	1681.37	1678.07	1682.69	1679.26	1678	1664.01	1673.67	1673.77	1688.46	1694.96	1687.92	1685.09	1679.51	1688.44	1694.79	1684.56	1693.51	1679.16	1694.42	1696.18
Average	1832.28	1825.99	1823.12	1821.24	1818.62	1814.98	1811.65	1810.1	1808.41	1804.77	1802.66	1800.24	1796.99	1793.4	1791.01	1786.86	1784.44	1782.55	1779.19	1777.87	1773.88	1772.91	1769.65	1766.35	1765.55	1762.66	1761.66	1760.13	1755.88	1754.51	1754.37	1751.96	1749.81	1751.26	1749.38	1750.54	1747.64	1748.61	1749.03	1749.08	1750.16	1750.48	1750.04	1752.71	1754.76	1757	1755.05	1757.77	1758.84
1	100	99.8699	99.2895	98.2713	97.8307	96.5112	96.3419	95.7376	95.2555	94.9062	95.0826	94.671	94.8544	93.9815	93.834	93.5756	92.8051	92.7002	92.0163	91.6931	91.4056	92.0034	91.1335	91.3252	90.7365	90.6263	90.2394	90.2226	90.1125	89.6064	89.3181	89.5331	89.331	89.3202	89.5952	89.0635	88.7583	89.9518	89.4138	90.073	90.1591	90.0673	89.8791	90.5453	91.0742	90.8614	91.7463	91.7592	91.8793
2	100	100.378	101.573	102.172	102.837	103.997	104.353	104.295	105.327	105.059	106.334	106.792	106.899	107.456	107.334	108.493	109.106	109.496	109.571	110.585	110.461	110.705	110.678	111.04	111.333	112.043	111.952	112.115	112.394	112.255	111.625	111.762	111.576	111.671	111.015	111.469	111.469	111.816	111.566	111.416	111.846	111.543	111.495	111.379	110.992	110.726	109.618	110.296	110.859
3	100	99.0973	99.4024	99.1173	98.5683	97.477	97.7817	96.6787	96.3532	95.9817	95.226	95.167	94.7408	94.0243	93.581	93.0637	92.3448	91.9396	91.1149	91.2009	91.3744	91.0795	90.4612	90.2872	90.0334	90.2546	89.914	89.2605	88.8126	88.7868	88.6681	88.4628	88.6008	88.57	89.1698	88.4008	88.2987	88.4128	88.6421	88.1425	88.7856	88.8254	88.4888	88.8409	89.2969	89.3523	89.4966	89.5857	90.1301
4	100	98.1896	98.1374	97.9239	97.6458	97.7201	96.9301	96.8851	97.2426	96.2347	96.8697	95.5727	95.2618	94.9037	94.7954	94.0871	94.3908	94.1189	93.9225	94.0861	92.9659	93.1379	93.2756	93.6899	92.9467	92.5514	92.1978	92.3601	92.2858	92.3143	93.2216	92.5761	92.4053	92.4989	92.2517	92.2058	92.594	92.0357	92.4598	91.7242	91.7621	91.7312	91.5888	91.5094	92.0295	92.2111	91.9102	91.7021	91.5906
5	100	99.5886	99.5227	98.373	98.7634	98.2867	97.8354	97.5262	97.8451	97.2813	97.2409	96.8739	96.4848	95.58	96.2322	94.8521	95.1876	95.3373	94.3098	93.9148	93.2608	92.8526	92.2067	92.4344	92.4207	92.0518	92.387	91.9584	91.1874	91.1751	91.3362	91.3185	90.9716	90.8021	91.1967	91.0424	91.1304	91.5417	91.2555	90.9317	90.844	91.8645	91.5216	91.5944	91.588	92.2898	92.2455	92.1559	91.8824
6	100	100.209	98.4796	98.344	97.8945	97.1927	96.2143	95.1768	94.8287	94.1549	94.4023	94.1068	93.4666	93.711	93.4726	93.952	94.0114	93.8613	93.3156	92.8375	92.3763	91.9	91.4526	90.8147	91.4416	91.5964	91.6532	91.3259	91.3764	91.0431	90.9353	91.5491	91.6592	91.4471	91.7094	91.5564	91.1066	91.1401	90.8345	90.6923	91.4179	91.1354	91.0102	91.6581	91.2896	91.1762	90.5569	91.22	90.6201
7	100	98.9136	98.8143	97.8092	97.325	97.1649	96.522	96.5363	97.0558	96.4062	96.7103	96.0102	96.0047	95.032	95.5671	95.0045	95.4389	95.0809	94.3454	93.4908	93.1372	93.0408	93.1165	92.3643	92.4404	92.0489	91.3865	90.8945	90.6174	90.637	91.0693	90.6453	90.3873	90.2661	90.3605	90.5149	90.4836	90.3941	89.998	90.5696	90.6634	90.5221	90.7677	90.7551	91.1206	90.8543	91.0883	91.6449	91.7548
8	100	99.5647	100.131	99.6922	99.3527	99.765	99.4247	99.1323	98.8599	98.8002	98.4129	98.8828	98.5898	97.6813	97.5952	97.2279	97.2645	97.4782	97.7326	97.4763	98.2806	98.6682	98.8547	98.9002	99.4363	99.6096	99.9775	100.182	99.949	100.09	100.776	101.472	101.066	101.66	101.481	101.979	102.48	102.357	101.508	100.915	99.9546	99.8774	100.54	99.7412	99.7642	99.4567	98.7573	98.901	98.9398
9	100	99.7429	100.439	100.565	101.474	102.095	101.821	101.989	102.196	102.165	102.22	102.54	100.968	100.87	100.056	99.5523	99.5434	99.4085	99.052	98.521	98.3974	98.0254	97.9974	97.9268	97.495	97.3264	97.3549	97.631	97.3593	97.1596	97.0329	97.0085	97.0015	96.9795	96.8951	97.2565	96.6703	96.4984	96.5904	96.8301	96.8412	97.4908	97.108	97.593	97.6875	97.4019	97.942	97.5988	97.7304
10	100	99.279	100.675	100.61	100.214	100.208	100.312	100.432	100.351	100.184	99.4394	99.5914	99.6387	99.224	99.3702	98.9234	98.3601	98.4424	98.219	98.3921	98.1511	98.1048	98.1712	97.844	97.6731	97.605	98.0867	97.435	97.8289	97.6604	97.511	97.5082	97.5021	97.4474	97.1685	97.5921	97.2161	97.3662	97.2426	97.3224	96.9783	97.0531	96.9518	97.1507	96.6973	97.0838	97.0631	97.037	96.6391
11	100	100.851	101.496	101.837	102.288	102.176	102.494	102.886	102.711	102.489	102.315	101.807	101.24	101.159	100.989	99.874	99.4792	99.512	99.4509	99.1568	99.054	98.6187	98.4302	98.3637	97.8697	97.818	97.7209	97.6683	97.6389	98.1228	97.6771	97.865	97.6412	98.0437	98.1573	97.9611	97.7461	97.9473	97.6146	97.7745	98.1613	98.3394	98.0929	98.534	98.6062	98.6431	98.9526	98.587	99.4561
12	100	99.4038	99.8446	98.635	98.6985	97.3382	96.7854	97.1494	96.2001	96.113	95.753	95.8932	96.7971	96.5492	95.9674	95.8958	95.7868	95.013	95.6285	94.7604	94.3739	94.1184	93.8484	93.7379	93.2571	93.2907	93.2502	93.1063	93.352	92.9314	92.867	93.0741	92.4604	92.7673	92.6459	92.7571	91.9495	92.6338	91.9644	91.616	91.3526	90.8683	91.1508	90.9329	91.1014	91.5116	91.0076	90.8054	91.6026
13	100	101.379	102.375	103.348	103.464	103.829	104.097	104.319	104.294	104.535	104.198	104.297	103.914	103.894	103.062	102.986	102.102	101.647	101.176	100.805	99.9631	99.9391	99.5539	99.1481	98.765	98.5068	98.0295	97.8942	97.7198	97.7468	97.2349	96.8811	96.5507	96.0227	95.9741	95.9761	95.983	95.6126	95.7235	96.2689	95.9182	95.8804	95.7167	95.5827	95.132	95.2263	94.625	94.7977	94.9788
14	100	100.178	99.5024	99.4548	99.2222	99.0704	98.7515	98.9795	99.2024	99.0096	99.1826	98.9178	98.2538	97.7908	98.0488	97.8675	97.9483	97.5236	97.0383	96.8126	96.658	96.71	95.9474	95.8236	96.188	95.8352	95.4505	95.3866	95.7439	94.9618	95.172	94.8846	94.5341	95.2807	94.929	94.4792	94.5537	94.179	94.6629	94.0734	94.5223	94.7947	94.7222	95.1445	95.9571	96.5109	96.4937	96.7139	96.8837
15	100	100.128	100.542	101.428	101.241	102.059	102.244	102.486	102.38	101.895	101.718	101.846	101.506	101.464	101.939	100.7	100.826	100.369	100.659	100.133	100.131	100	99.6266	99.3192	99.2534	101.032	98.7833	99.0322	99.4769	99.2173	99.266	99.898	99.3836	99.5109	99.4351	100.061	99.966	100.134	100.427	100.547	100.471	100.606	101.623	100.455	100.997	101.136	100.902	101.16	101.373
16	100	100.774	100.728	101.298	101.724	101.004	100.208	100.21	100.006	99.5717	98.8734	97.6803	96.9683	96.0767	95.6743	95.197	95.1135	95.1767	94.7674	94.5623	94.5094	93.7383	94.2083	94.0295	93.895	93.4956	93.5806	93.2695	93.5461	93.0688	92.785	93.0381	93.255	92.7675	93.1171	92.8217	93.1444	92.9619	93.0857	92.9726	92.9109	92.9493	93.2679	93.489	93.4954	93.3911	93.4625	93.4209	93.2474
17	100	98.758	98.4568	97.5414	97.9358	97.0702	97.6481	97.845	98.0544	97.4576	97.2561	97.3016	97.218	97.5053	97.0145	96.755	96.8165	96.3739	96.5687	96.2953	95.9555	95.6263	95.7113	95.2131	95.3976	95.0017	95.0845	94.6653	94.2355	94.1434	93.942	93.3592	93.2885	92.9079	92.488	92.5069	91.9896	91.8541	91.5894	91.3563	90.8564	91.2769	91.378	91.2723	91.6488	91.6359	91.1434	91.7135	91.0277
18	100	101.528	100.603	100.826	100.469	100.777	100.082	99.9993	100.157	100.305	99.8455	99.1493	98.9002	98.4518	97.2576	96.9287	95.7676	96.1366	95.2109	94.5133	94.3244	93.8851	93.5649	93.6241	93.6713	93.515	92.995	92.9547	93.0299	92.9316	92.6628	92.6639	93.0658	92.573	92.9172	92.4668	92.4991	92.6706	93.2503	92.6444	92.9492	92.3821	92.6804	92.9971	92.4566	93.0649	92.2411	92.0362	91.9579
19	100	98.6296	97.0948	96.1612	95.5452	94.9698	94.1495	93.9409	93.2691	92.8319	92.2426	92.1906	92.6426	92.2445	91.9665	91.9855	92.548	92.1126	91.9124	92.0286	91.6257	91.617	91.1231	91.0625	90.9547	90.4675	90.2417	90.1793	89.6222	89.4306	89.7677	89.6325	89.5549	89.6931	89.5881	89.2458	89.0312	88.9648	88.7658	88.8809	88.9659	88.6483	88.4517	88.3179	87.8559	87.8159	87.8394	87.5207	87.7259
20	100	99.5432	98.9659	98.7127	97.7474	97.8184	97.7951	96.7746	96.3542	96.1791	95.6671	95.3101	94.676	94.9694	94.1202	93.8563	94.1007	93.5339	93.248	93.3067	93.46	93.2483	92.5755	93.1488	92.9924	92.7724	92.6189	93.072	92.3653	92.6519	92.4767	92.036	92.6267	92.7529	92.5113	93.2572	93.5713	93.5641	93.7191	94.0448	94.1285	94.8079	94.4852	95.8377	95.1377	95.2685	96.3108	96.5576	96.9039
21	100	96.4226	95.8415	94.7573	93.7486	92.8886	92.4008	92.0146	92.531	91.1685	91.3536	90.2759	90.2839	89.5868	90.1446	89.9051	90.097	89.5789	89.6189	89.3043	89.3636	89.3415	88.8022	89.6016	89.3084	88.3958	88.6727	88.4114	88.2345	87.7119	87.1162	87.0837	87.0086	87.1984	86.8269	86.9952	86.6639	87.0099	87.2797	87.1173	87.1985	87.5465	87.4669	87.7131	87.9364	87.943	87.6766	87.8002	88.5447
22	100	99.8283	99.4706	98.4264	98.8705	97.9925	97.8278	97.3862	97.179	96.166	96.4549	95.6182	95.5587	95.5228	95.006	95.0117	94.7535	95.0167	95.0844	94.6134	94.4601	94.8062	94.4475	94.4824	93.9885	94.0466	94.9322	94.8464	95.0163	95.1263	95.577	95.2999	96.4864	96.312	96.4359	97.0705	97.9247	98.3173	98.9086	99.1558	99.4612	100.217	99.7066	100.523	100.871	101.338	101.06	101.506	101.33
23	100	99.3993	98.2324	97.4786	97.1738	97.064	96.2553	96.1328	95.0111	94.7812	94.9714	93.966	94.2238	93.6004	93.1818	93.2922	92.466	92.7554	91.9955	92.4324	92.0105	91.9837	91.1195	90.7605	91.0583	91.621	91.5703	91.5916	91.2486	91.6184	90.9762	91.2201	90.7663	90.7979	90.9766	91.2792	90.9312	91.6518	92.4338	93.1951	94.9673	95.8847	96.7661	97.3731	98.243	99.2489	99.6309	100.924	100.594
24	100	98.705	97.8082	97.0687	96.8912	96.6982	96.5831	96.6485	96.6427	96.5384	96.3267	96.8437	97.1032	96.9066	96.6851	97.2171	96.5391	96.8545	96.6535	96.6187	96.2296	96.4802	96.254	96.3634	96.5588	96.2511	96.1483	96.9642	97.0915	96.5426	97.1227	96.9035	96.8488	96.9806	96.9461	97.6408	96.6852	96.4676	96.7433	95.8091	95.6312	96.3948	96.7078	96.6185	96.7414	96.58	96.4981	96.2014	96.1262
25	100	99.7389	99.6794	100.067	99.9574	99.2209	99.8059	99.6239	99.6846	99.6284	99.9553	99.967	99.384	99.8767	99.6111	99.1825	98.9125	98.4955	98.9371	98.5517	98.5344	98.4628	98.4142	97.5719	97.5916	96.6462	97.3433	97.0347	97.4307	96.4326	96.7733	96.0292	95.748	95.8016	95.8395	96.4298	96.2592	96.0977	96.135	96.2191	96.7144	96.6232	96.5235	96.7807	97.3267	98.1627	98.4364	98.6376	99.9433
26	100	99.7239	99.4519	99.4466	99.1867	99.1809	99.0908	98.9295	98.2663	98.2713	98.4883	98.1374	98.2888	98.2686	98.2187	98.2205	97.7357	98.0097	97.6659	98.3376	97.9473	97.9606	97.8085	97.3874	97.4031	97.2117	96.9779	97.2718	96.6978	96.6671	96.5662	95.809	95.2909	95.3233	95.1406	95.1269	94.3564	93.8625	94.1784	94.233	93.9979	93.5498	93.4024	92.9491	93.0714	93.0739	92.9988	92.4333	92.3516
27	100	100.542	100.936	101.608	101.275	101.79	102.06	102.405	103.031	103.516	103.666	103.94	104.146	105.203	105.62	105.152	105.422	105.607	106.053	105.708	106.108	105.672	106.078	106.303	106.002	106.143	106.327	106.987	107.15	107.13	107.103	106.462	107.14	107.464	107.315	107.39	107.237	107.42	107.53	107.014	107.277	106.71	106.932	107.416	107.689	107.885	107.151	107.097	106.887
28	100	98.9359	99.6676	100.058	98.6409	99.3414	99.0907	99.3539	99.5681	98.7142	98.4682	99.3518	99.1769	98.5457	99.7625	99.8822	99.2995	99.9785	100	100.16	100.253	101.308	100.658	100.787	101.612	102.093	102.05	102.115	102.798	103.131	103.23	103.433	103.125	104.317	103.616	103.592	103.524	103.672	103.313	104.27	104.31	103.694	103.924	102.472	102.888	102.101	102.657	101.069	101.84
29	100	99.839	98.8046	99.0214	99.59	98.4357	99.2177	99.6328	97.9254	99.0431	99.3933	98.9617	98.329	98.3296	99.3563	98.585	97.4403	97.7088	98.3335	99.0118	98.6327	98.1066	98.2571	97.8795	97.9659	96.9933	97.9212	97.8925	95.374	96.4184	96.5376	96.865	95.8542	95.8529	95.8133	95.8091	95.4444	95.5317	95.3521	95.7444	96.0235	95.6552	95.6015	95.6752	95.2092	94.8421	94.0604	94.5292	95.0122
30	100	100.457	100.55	101.549	101.841	102.471	102.685	102.858	102.556	102.818	102.474	102.287	102.216	102.582	102.173	101.791	101.302	100.716	100.221	100.084	99.8019	99.3363	98.7701	98.4881	97.5102	97.2148	96.5878	96.1076	95.0664	95.1767	94.7241	94.282	93.8617	93.9353	94.1016	93.5593	93.6249	93.9893	93.7856	93.8895	93.9753	93.573	93.1644	93.3659	92.795	92.6427	92.4707	92.5246	92.2399
31	100	99.2169	98.2782	97.7569	96.7291	97.0657	95.7752	95.992	95.1972	95.2311	95.1514	94.538	94.8883	94.809	93.8632	94.45	93.2115	92.9357	93.4862	92.6723	92.5944	92.2829	92.3727	91.3788	91.0198	91.1198	90.8128	90.6277	89.9907	90.3925	89.6706	90.1359	89.2867	89.3033	88.6663	88.1937	89.2477	88.5895	88.786	88.7025	88.443	87.9344	87.7503	88.0399	88.127	88.2234	88.3719	88.7362	88.9171
32	100	99.3088	98.5016	99.5094	98.7621	98.2977	97.2692	96.7232	96.3085	96.6557	95.5533	95.53	95.2411	94.1046	93.8666	93.7114	93.8676	92.9553	92.7128	92.3697	91.3417	92.0837	92.06	90.9381	91.4044	90.3493	90.2282	90.3896	89.5813	88.6443	88.8554	88.2292	87.7012	88.3443	88.1076	87.5018	86.8353	86.5357	86.3908	86.2337	85.6419	85.9061	85.1725	85.5272	85.476	84.7562	84.9553	85.5794	85.7543
33	100	98.9555	97.8852	97.5453	96.8147	96.33	96.2919	95.9724	96.2705	96.4727	95.949	96.439	96.6146	96.6153	96.9944	97.1712	97.2291	97.8938	97.3884	97.4207	97.7553	97.612	98.437	98.0399	98.0418	98.8293	98.3994	98.5909	98.1381	98.3442	97.6697	97.0218	96.4235	96.191	96.0235	95.6358	95.3987	96.0681	95.8244	96.2628	96.4105	95.6889	95.355	95.1465	94.9301	95.3605	95.3561	94.7686	94.5786
34	100	100.921	101.606	102.455	102.537	102.525	103.274	104.029	104.363	105.095	104.241	104.448	104.532	104.737	104.576	104.083	103.436	103.683	102.658	102.967	103.382	103.328	103.422	101.945	101.512	101.067	101.318	100.961	100.185	99.8005	100.789	100.597	101.171	100.848	101.593	101.581	100.931	100.356	100.676	101.209	101.129	100.61	100.536	100.008	100.53	100.412	100.565	100.63	99.9071
35	100	100.336	100.431	100.04	99.5	99.1238	98.9244	98.265	98.1997	98.344	97.9927	97.6563	97.7232	96.7854	96.9005	96.2212	95.8195	96.2165	96.3536	96.414	96.237	95.6368	95.688	96.3136	95.7329	95.5087	95.8124	94.9803	94.8098	95.0577	94.6863	94.0198	94.6104	94.4947	94.2163	94.1444	93.5695	93.3524	93.3841	93.4979	93.0721	93.3628	92.82	92.9648	93.13	93.5607	93.7769	94.2444	93.8381
36	100	99.152	100.248	100.438	100.621	101.193	102.294	101.448	101.958	101.627	102.239	103.019	103.621	102.906	103.448	103.813	103.666	103.685	103.915	103.996	103.822	103.62	103.994	103.408	104.347	105.123	105.532	103.749	104.071	103.035	104.945	104.649	105.154	105.873	104.869	104.294	105.128	104.737	103.894	103.504	103.749	103.765	103.829	104.271	105.051	104.885	103.46	103.994	102.982
37	100	100.018	99.5147	99.6814	99.3954	99.4094	99.3024	98.9802	98.6535	98.8572	98.9322	98.6281	98.3521	98.3038	98.2881	98.2933	98.3567	98.1116	97.9421	97.5533	97.6516	97.6727	97.2127	96.7572	97.3889	96.1939	96.8745	96.9629	95.7387	97.8896	97.5226	97.8834	97.4398	98.1627	98.0499	98.9015	98.9231	99.4109	100.931	100.799	101.205	101.964	102.835	103.102	104.298	104.618	104.608	106.23	105.852
38	100	99.6574	99.764	101.154	101.018	100.765	100.277	100.792	100.669	100.917	100.908	101.35	101.37	101.779	101.76	101.767	101.331	101.79	102.06	102.492	102.563	102.659	102.679	102.352	102.049	101.27	102.469	102.619	103.179	103.006	104.221	104.366	103.903	104.276	103.877	104.144	103.533	103.539	102.493	103.182	102.744	103.535	101.972	103.132	103.637	103.16	103.033	102.968	102.609
39	100	99.4425	98.1494	97.6854	97.1688	96.5501	95.3873	95.5345	94.5233	94.6654	94.3037	94.3266	93.8383	93.9871	93.9393	92.7692	93.8182	92.6905	92.483	92.1765	91.5291	91.5881	91.2182	90.7889	91.0248	90.7762	90.34	90.3394	89.5879	89.8157	89.4133	89.1671	88.8809	89.1089	88.8163	89.1029	88.6049	88.4639	88.2817	87.944	88.0836	87.6765	87.236	87.317	87.377	87.6138	87.59	87.2171	87.0508
40	100	99.3738	99.1301	99.1135	99.4301	99.2042	99.406	99.1869	99.7736	99.8659	99.9879	100.723	100.473	100.334	100.467	100.841	100.699	101.02	100.782	101.965	101.331	101.446	102.486	102.085	102.398	102.506	102.87	103.204	103.387	103.528	104.108	103.673	104.167	103.987	104.632	105.392	105.169	105.552	106.239	106.399	106.434	106.764	107.688	107.849	108.745	109.556	109.499	110.023	110.714
41	100	99.38	98.674	98.2278	99.4127	98.0821	98.3332	98.6124	98.8415	98.3508	98.5268	98.2549	98.5356	97.8927	97.8519	97.4885	97.6472	97.5842	96.8617	96.9338	96.364	96.0632	95.4192	95.6708	95.9743	95.5304	94.952	95.1002	94.3084	93.8636	93.7137	93.7834	93.4162	93.5597	93.2845	93.2997	92.6298	92.3881	92.3596	92.5005	92.6475	91.7511	92.196	92.3543	92.2547	92.5559	92.6578	93.2711	93.1446
42	100	100.542	100.455	100.181	100.071	99.9293	99.1691	98.6628	98.5784	97.6636	97.0161	97.5343	96.3442	96.8953	96.1048	97.4318	98.2036	98.8058	99.3767	101.043	101.107	102.842	102.866	102.726	103.748	103.501	103.7	103.555	103.022	102.618	102.417	102.699	102.489	102.412	101.559	102.148	102.154	103.05	103.447	103.018	102.845	102.505	103.049	103.437	102.813	103.359	102.483	103.414	103.522
	100	99.6643	99.5037	99.414	99.2589	99.0497	98.8693	98.7658	98.6589	98.475	98.3653	98.2475	98.0778	97.8605	97.7547	97.549	97.3856	97.318	97.1391	97.0809	96.8782	96.8408	96.6762	96.4792	96.4724	96.3295	96.3034	96.2123	95.9705	95.902	95.9305	95.8281	95.7056	95.7982	95.6979	95.7582	95.6051	95.669	95.6829	95.6832	95.7488	95.7613	95.7513	95.8896	96.0254	96.1308	96.0095	96.1669	96.2124
	6.57835e-15	0.890612	1.28981	1.77529	2.02203	2.36674	2.65571	2.83142	3.03588	3.23085	3.30029	3.53416	3.51266	3.74187	3.80667	3.86674	3.84917	4.01272	4.12868	4.34426	4.45992	4.52782	4.7176	4.69289	4.79498	4.98415	5.08365	5.12829	5.31076	5.32057	5.47372	5.4994	5.57995	5.6704	5.56744	5.74511	5.79763	5.83701	5.82864	5.86264	5.8754	5.8898	6.03378	5.98428	6.09958	6.13726	6.00286	6.1139	6.12422
[truncated: 2 more columns]
