# Supplementary material for: A mechano-osmotic feedback couples cell volume to the rate of cell deformation
Source: eLife journal article supplement (doi:10.7554/elife.72381), 2022-04-13
Supplement: supp [file data_sum.xlsx]

## Sheet: Sheet1
	dA/dt i (µm2/min)	stdev (µm2/min)	sterr (µm2/min)	dV/dt i (µm3/min)	stdev (µm3/min)	sterr (µm3/min)
control all, n=194	15.4299	11.327	0.813231	-5.88297	9.08106	0.651982
Y-27, n=121	34.1766	15.2972	1.39065	-16.2314	13.7853	1.25321
LatA, n=41	9.601	7.54742	1.17871	-3.12487	6.0181	0.93987
MnCL2, n=57	30.925	8.79745	1.16525	-8.50026	11.8774	1.5732
control slow	6.1095	1.80584	0.278648	-2.78487	6.71735	1.03651
control moderate	13.8797	3.11278	0.474694	-5.16956	6.54939	0.998772
control fast	29.3245	8.78448	1.35548	-9.67865	8.86091	1.36727
