# Supplementary material for: A mechano-osmotic feedback couples cell volume to the rate of cell deformation
Source: eLife journal article supplement (doi:10.7554/elife.72381), 2022-04-13
Supplement: supp [file dv_Vi.xlsx]

## Sheet: Sheet1
Vi	dV	k
1468.79	-10.0524	500
2925.37	-9.06027	5000
1968.28	-6.51538
1213.45	-3.26239
2410.09	-11.3324
1638.48	-4.41312
1597.72	-9.19791
2811.4	-4.46364
2064.79	-6.4591
1789.43	-3.38085
2161.32	-8.66486
1680.04	-10.5889
2026.2	-14.7518
1452.19	-3.20702
1554.35	-10.6915
2507.59	-16.4762
2074.26	-12.8424
1215.81	-7.36196
1420.28	-1.06732
2667.57	-9.24647
2601.67	-7.30757
1660.94	-10.9596
2234.58	-12.2342
1531.78	-9.09844
2183.46	-10.4647
1430.39	-9.13167
1535.57	-12.7332
1771.58	-6.70279
1983.87	-7.67284
1404.36	-4.21588
1947.76	-10.388
2109.67	-13.3361
1825.97	-8.49064
1325.94	-9.3845
1977.95	-3.76468
1868.34	-8.08295
2039.14	-4.89255
1454.03	-5.07771
1703.33	-6.90118
1781.67	-8.05864
2682.38	-0.550281
1756.6	-5.5079
2003.2	-2.4824
1352.43	-2.2126
2319.75	-1.69301
953.355	-6.48214
2014.97	-10.1453
2999.21	-3.94126
2068.95	-5.98353
1630.6	-4.05101
2245.4	-4.85804
3142.55	-14.6239
1041.56	-2.43014
1646.51	-17.048
2994.01	-1.5867
1795.73	-7.64849
2404.41	-10.7557
1478.22	-40.9711
1338.84	-3.73296
2631.78	-11.6373
1798.71	-10.2115
2397.04	-11.8388
1948.94	-14.1447
1667.99	-8.29051
2330.03	-6.78017
1806.3	-8.3476
1663.21	-13.1477
1482.48	-14.5749
1563.25	-12.6607
3239.04	-17.24
3576.08	-14.8429
1649.8	-2.14811
2463.14	-11.4707
1493.38	-24.6883
1864.03	-7.96397
2086.97	-9.39807
1841.08	-8.69142
1758.74	-13.9966
1327.46	-3.36945
1666.39	-4.97122
1358.15	-5.32578
2452.4	-11.5196
1790.99	-9.64072
1604.19	-9.07396
1683.16	-9.15924
1438.7	-5.10793
2301.72	-14.1507
1728.38	-11.4568
1292.61	-7.56178
2230.2	-5.00372
2068.64	-2.76684
1919.84	-19.0001
1825.03	-25.1029
1946.43	-8.24889
2165.8	-13.882
2523.85	-0.725917
1671.55	-0.925401
2008.32	-10.002
3521.94	-6.86126
1465.72	-3.67325
1489.46	-11.5475
2153.14	-14.9268
1527.44	-15.2438
1390.41	-5.4149
2287.87	-8.13893
2034.93	-13.0422
2626.51	-7.29755
1867.27	-0.86992
1594.03	-18.0529
2323.11	-0.964368
1525.04	-6.73002
1602.04	-2.77213
2074.81	-10.6406
1647.86	-3.4037
2518.59	-4.98969
1982.7	-13.2874
1516.06	-3.8061
1147.19	-7.57461
2071.09	-12.0528
1159.62	-5.93964
1490.27	-1.56081
3195.67	-12.828
2197.61	-10.1656
1664.82	-5.56921
1481.93	-11.2352
2172.12	-12.1975
2455.18	-9.14355
2231.74	-3.50163
1224.12	-6.33112
1204.48	-9.57099
1936.07	-6.80739
2541.8	-8.04713
2429.17	-8.59992
1555.87	-11.2417
1903.85	-7.64837
1319.18	-8.00079
2211.88	-3.05998
1918.11	-8.47041
1898.41	-7.18004
1398.77	-6.48789
4418.32	-11.2825
1991.9	-4.25199
1704.29	-9.84291
1419.82	-6.62482
4823.78	-7.95893
1208.27	-5.20075
2400.04	-11.7786
1287.87	-8.97322
1481.17	-13.1562
2277.84	-13.367
1072.46	-8.82414
2468.59	-3.40408
1433.7	-12.9005
3034.32	-10.637
1466.31	-8.09103
1577.77	-5.9683
1688.61	-12.2497
1923.32	-7.34288
1635.39	-6.27195
1898.06	-9.62942
1458.75	-2.66524
2241.55	-10.0411
2588.39	-2.3656
2461.14	-5.92655
1504.49	-10.1545
1557.67	-9.86672
1305.99	-11.6294
1165.26	-5.01903
2421.8	-7.16181
1538.13	-8.51298
