# Supplementary material for: A mechano-osmotic feedback couples cell volume to the rate of cell deformation
Source: eLife journal article supplement (doi:10.7554/elife.72381), 2022-04-13
Supplement: supp [file dVdt.xlsx]

## Sheet: hyper C
		46.3339						14.6617						26.549						37.8674
20181102 hyper C		10.9443				20191218 hyper 1		8.33104				20191218 hyper 2		9.58199				20191218 hyper 5		10.8754
pos	cell	dV/dt (µm3/min)	Vi (µm3)	Vmin		pos	cell	dV/dt (µm3/min)	Vi (µm3)	Vmin		pos	cell	dV/dt (µm3/min)	Vi (µm3)	Vmin		pos	cell	dV/dt (µm3/min)	Vi (µm3)	Vmin
1	1	51.3913	1941.53	987.893		1	1	26.4262	2805.85	2551.13		1	2	39.4144	2646.42	2255.76		1	3	29.1327	1207.83	788.304
1	2	30.2617	1101.89	464.51		1	2	14.3166	2062.82	1816.53		1	3	26.549	1390.77	1203.75		1	6	45.012	1553.33	1001.17
1	3	43.0873	1801.46	1074.31		1	3	25.9224	2855.07	2612.99		1	4	29.6331	1608.96	1331.46		1	7	39.2864	1393.45	911.851
1	4	54.5059	1482.15	711.021		1	4	17.1849	2246.97	1920.14		1	5	22.0907	2610.62	2227.6		1	8	46.2762	1710.81	1141.25
1	5	44.6418	1929.45	1133.9		1	5	27.7592	2141.61	1858.65		1	6	28.1944	1317.28	1108.82		1	10	37.1919	1734.44	1154.83
1	8	61.08	1673.89	744.165		1	6	6.04378	1395.31	1256.36		1	7	38.1587	2014.65	1712.61		1	12	25.8259	1367.59	1017.15
1	9	33.8823	1171.28	430.929		1	8	26.1657	2020.34	1793.65		1	8	13.1872	2761.46	2369.96		1	15	36.9967	1739.95	1194.08
1	10	41.6623	1401.72	618.554		1	10	13.2598	1246.54	1160.48		1	11	18.2544	1351.16	1125.64		1	17	59.3564	2762.58	2144.54
1	11	51.4484	1467.89	724.899		1	11	30.7281	1306.21	1158		1	12	45.2566	2684.64	2382.12		1	19	58.9471	2544.27	1806.29
1	12	27.9869	1661.75	924.717		1	15	22.3516	2218.13	1993.21		2	1	24.1943	1518.85	1380.23		1	22	41.9408	2267.96	1658.84
1	13	66.172	2558.77	1304.29		1	16	28.6055	2055.5	1865.09		2	2	35.2766	2222.38	1836.46		2	1	26.8913	1025.9	656.94
1	14	48.3476	2419.44	1446.21		1	18	27.2614	2563.99	2275.99		2	3	31.5635	2155.85	1782.97		2	2	31.6937	1626.89	1087.58
2	1	52.8868	1517.79	668.212		2	2	5.69416	2090.36	1870.21		2	4	30.0017	1919.4	1623.85		2	6	46.1843	1562.58	1037.01
2	2	42.7909	1437.43	693.767		2	3	9.55968	1069.31	1007.14		2	5	19.0864	1123.28	943.78		2	8	36.4851	1595.48	1179.07
2	3	36.8277	1775.22	987.447		2	6	7.18924	909.142	778.776		2	6	16.9891	1453.42	1231.26		2	13	35.4949	1698.55	1147.16
2	4	60.0374	2376.1	1387.26		2	10	11.646	1979.48	1715.14		2	7	32.1995	1771.99	1587.66		2	14	59.9198	2767.16	2105.92
2	5	32.7006	1594.82	929.861		3	3	23.0324	2291.28	1780.1		2	8	21.0204	1354.36	1154.3		2	15	20.5171	1492.68	1095.28
2	6	67.0119	1848.02	849.726		3	4	14.6711	1875.68	1754.64		2	9	42.296	1913.5	1647.76		2	16	56.9615	2413.42	1664.63
2	7	44.8177	2183.83	1249.85		3	6	6.67223	1143.43	973.386		3	3	11.9802	1436.85	1276.3			2	29.5471	1368.93	922.292
2	8	57.212	1907.25	890.984		4	2	5.85802	1315.69	1207.65		3	4	11.8864	1147.96	940.736			5	42.4923	1999.05	1392.14
2	9	42.2014	2415.72	1401.98		4	3	12.7906	1570.28	1420.99		3	5	15.8217	1907.94	1695.97			8	53.3474	1840.33	1282.97
2	10	51.9941	2097.31	975.233		4	4	10.195	1959.55	1808.77		3	6	29.7417	2170.37	1799.35			11	20.8657	906.148	609.906
2	11	43.977	2414.45	1453.89		4	5	7.10421	2165.39	2005.39		3	7	19.0287	1332.85	1103.95			12	35.4782	1409.44	988.323
2	12	51.629	1546.07	751.573		4	8	14.6524	1077.68	957.377									13	36.4849	2275.33	1653.29
2	13	59.6973	1558.91	767.77		4	11	24.7956	3111.8	2779.78									14	31.9292	995.64	630.48
2	14	35.834	1575.08	908.425		4	12	22.3882	2863.32	2641.56									15	43.4706	1437.02	985.828
2	15	26.3899	1096.97	525.704															16	34.0948	1468.61	956.455
2	16	47.8501	2247.39	1315.51															17	57.2758	2870.23	2078.59
																			18	27.6668	1715.75	1275.19
																			19	47.5866	1584.98	1185.04
																			20	41.1624	1922.49	1421.11
																			21	38.543	2024.73	1388.93
																			22	30.9406	1371	998.676
																			23	50.4634	2089.09	1383

## Sheet: hyper L
		31.431				31.431
20181102 hyper L		17.9322				17.9322
pos	cell	dV/dt	Vi	Vmin
1	1	27.4357	1038.18	523.104
1	2	38.3281	1918.61	1017.83
1	3	38.973	1756.56	1032.19
1	4	30.0852	1087.15	568.982
1	5	29.7011	1294.63	631.553
1	6	29.4534	1197.3	620.354
1	7	32.0556	1341.25	741.359
1	8	35.4485	1154.86	589.554
2.1	1	34.1876	1313.96	722.296
2.1	2	34.7757	1114.66	534.256
2.1	4	29.3487	1231.64	602.423
2.1	5	18.0262	1698.09	864.29
2.1	6	39.9134	1538.19	800.569
2.1	7	19.5622	801.069	334.629
2.2	1	28.8364	1392.45	657.526
2.2	2	30.71	1105.22	518.079
2.2	3	21.0001	1265.79	637.555
2.2	4	25.0979	1206.13	572.343
3	1	31.431	1512.62	742.468
3	2	38.8545	1572.91	762.438
3	3	43.261	1712.17	874.794
3	4	28.6369	1061.45	501.405
3	5	29.3454	842.927	356.865
3	6	21.7822	3073.86	1564.92
3	7	37.5484	1321.64	605.126
3	8	32.908	1397.99	661.307
3	9	124.842	5367.55	3134.68
3	10	33.4372	1215.57	579.911
3	11	35.4206	1163.28	530.449
3	12	54.2556	2959.9	1564.78
3	13	27.2337	1188.65	577.787

## Sheet: hypo C
		-162.467						-22.8823						-27.7522						-32.172						-113.562						-18.8436						-36.2279						-100.374
20181102 hypo C		67.8314				20181126 hypo 10		13.1422				20181126 hypo 30		43.8468				20181126 hypo 40		31.8708				20181126 hypo 50		47.5345				20181206 hypo 10		14.9343				20181206 hypo 30		35.2237				20181206 hypo 50		54.8235				20190328 hypo 20
pos	cell	dV/dt	Vi	Vmax		pos	cell	dV/dt	Vi	Vmax		pos	cell	dV/dt	Vi	Vmax		pos	cell	dV/dt	Vi	Vmax		pos	cell	dV/dt	Vi	Vmax		pos	cell	dV/dt	Vi	Vmax		pos	cell	dV/dt	Vi	Vmax		pos	cell	dV/dt	Vi	Vmax		pos	cell
1	1	-248.582	1711.86	2866.12		1	1	-34.0433	1785.4	1909.73		1	1	-13.2733	1203.28	1652.72		1	1	-102.548	1279.88	1697.6		1	1	-57.9643	1329.41	2108.49		1	1	-14.7583	1447.47	1553.17		1	1	-73.7848	1361.57	1692.73		1	2	-262.729	1868.9	3110.71		1	1
1	2	-108.5	1606.61	2662.38		1	2	-20.7342	1345.62	1490.65		1	2	-67.5685	1591.29	1936.62		1	2	-32.071	1471.03	1891.16		1	2	-88.1942	1853.21	2841.51		1	2	-42.4202	2793.74	2965.97		1	2	-38.7065	1339.1	1754.7		1	4	-83.8732	1315.35	2382.12		1	2
1	3	-75.9674	1055.7	2007.72		1	3	-1.44899	1113.53	1204.94		1	3	-83.8301	1547.92	2067.58		1	4	-13.2702	1064.32	1565.22		1	3	-48.7504	1661.78	2279.49		1	3	-32.1933	1854.35	1876.98		1	3	-57.4955	2446.03	3159.53		1	5	-170.263	2090.54	3291.7		1	3
1	4	-340.515	2141.45	3685.41		1	4	-37.8901	1820.29	1887.64		1	4	-74.8548	1780.26	2413.74		1	5	-34.6419	1404.84	1961.27		1	4	-70.0448	1414.33	2256.92		1	4	-38.9749	1936.35	2109.62		1	4	-24.0399	1562.8	1977.64		1	12	-130.326	1211.87	2193.82		1	4
1	5	-160.364	1292.92	2356.12		1	5	-2.37527	1524.88	1711.34		1	5	-14.3542	871.271	1208.91		1	6	-23.0471	1184.7	1692.46		1	5	-156.716	1533.24	2284.47		1	5	-37.4829	2321.26	2497.43		1	5	-77.2617	1173.35	1548.13		1	14	-140.865	1431.46	2278.44		1	5
1	6	-164.569	1845.71	3045.1		1	6	-7.87554	1901.75	1198.71		1	6	-77.0194	2192.04	2845.46		1	7	-93.5511	1643.11	2474.4		2	1	-200.204	1632.54	2748.14		1	6	9.0931	1370.99	1544.76		1	6	-25.6776	1561.8	1940.24		2	1	-127.258	1595.67	2392.75		1	6
1	8	-177.901	1487.59	2409.29		1	7	-22.523	1539.8	1677.19		1	7	-104.478	2265.96	2993.73		1	8	-97.3094	1134.06	1667.18		3	1	-129.886	2296.02	3657.76		1	7	7.41384	1436	1558.76		1	7	-100.673	2471.81	3058.56		2	8	-58.5352	1446.65	2197.8		1	7
1	9	-254.744	2190.46	3624.49		2	1	-43.0799	2257.39	2438.58		1	8	-13.2155	1126.35	1543.96		2	1	-114.355	1358.14	1793.52		3	2	-126.873	2315.82	3640.28		1	8	-27.2951	2479.66	2832.65		1	8	-35.4164	1269.41	1686.26		2	10	-97.2928	1581.22	2679.83		1	8
1	10	-342.626	2538.44	4069.18		2	2	-29.4264	1641.16	1774.05		1	9	-92.6654	1189.51	1690.02		2	2	-28.3948	942.682	1438.63		3	3	-125.812	1761.01	2950.12		1	9	-38.2277	2025.58	2163.69		1	11	-76.3054	1682.16	2059.37		4	1	-66.488	1593.29	2856.29		1	9
1	11	-189.494	1300.16	2185.48		2	3	-39.7097	2305.14	2501.19		1	10	-13.4868	1032.05	1363.05		2	3	-32.2729	1198.41	1607.52		3	4	-126.872	2241.8	3649.04		1	11	12.3457	1928.7	2185.25		1	12	3.09706	1538.95	1882.94		4	2	-124.977	1270.62	2150.69		1	10
1	12	-117.747	1383.8	2485.57		2	4	-22.8823	1810.86	1965.69		1	11	-118.91	2105.6	2747.28		2	4	-35.9778	1728.14	2393.16		3	5	-103.96	1828.53	2780.22		1	15	-19.5609	1589.32	1737.18		1	13	-119.632	2618.39	3275.49		4	6	-80.3207	1799.78	2746.72		1	11
1	13	-212.09	2375.02	3801.57		2	5	-13.1017	1794.11	1894.84		1	12	-9.12253	1084.01	1519.24		2	5	-18.2023	926.312	1385.81		3	6	-135.979	1513.25	2518.77		1	18	-24.1689	1814.84	1930.11		2	1	-34.206	1727.84	2131.88		4	7	-177.68	1593.13	2512.79		1	12
1	14	-134.961	2538.58	3765.26		2	6	-18.3331	1938.96	2130.93		1	13	-16.8062	2305.77	3161.62		2	6	-15.473	1182.59	1634.84		3	7	-76.9201	1473	2562.02		1	19	-24.7164	1855.5	1812.04		2	3	9.1997	1940.48	2271.63		4	10	-123.004	1408.49	2281.07		1	13
1	15	-165.084	2035.55	3232.99		2	7	-23.8143	1708.71	1795.87		1	14	-3.4337	1063.52	1406.61		2	7	-27.8457	1095.05	1604.26		3	8	-92.1277	1603.99	2593.71		1	23	-8.60734	1611.96	1822.76		2	4	-52.9773	2424.04	2734.15		4	11	-84.2451	1679.61	2810.11		1	14
1	16	-199.335	2508.15	3781.22		2	8	-30.658	1947.81	2213.61		1	15	-30.4053	1768.11	2268.32		3	1	-36.4016	1437.56	1968.24		3	9	-109.215	1891.91	2833.42		1	24	-19.6674	1765.59	1922.41		2	5	-37.0393	1607.13	1770.64		4	12	-128.725	1719.58	2469.36		1	15
1	17	-211.714	1938.63	3475.78		3	1	-13.7705	1717.39	1824.71		1	16	-56.4625	1031.48	1373.91		3	2	-23.9518	1364.02	1837.36		3	10	-60.3739	1743.52	2984.61		1	25	-17.6355	3604.56	3878.33		2	6	-60.4365	2445.2	2799.67		4	13	-31.5846	908.519	1536.73		1	16
1	18	-126.148	1086.02	1798.34		3	2	-34.1426	2059.88	2313.21		2	2	-162.517	2166.02	2742.17		3	3	-14.6453	1288.54	1847.99		3	11	-290.345	2379.24	3372.22		1	26	-8.48982	2183.04	2386.43		2	7	-24.7291	1486.76	1695.98		4	14	-35.9022	1214.23	1939.6		2	1
1	19	-182.148	1570.06	2557.83		3	3	-37.8725	1834.81	1934.96		2	3	-4.98188	1511.92	1923.88		3	4	-18.7895	1555.15	2028.06		3	12	-148.987	2171.94	3598.93		1	27	-19.7107	1563.36	1700.27		2	8	-50.7723	2237.92	2588.13		4	17	-206.058	2289.17	3468.39		2	2
1	20	-206.998	1914.08	3170.89		3	4	2.70961	1879.66	2139.87		2	4	-61.9467	1976.63	2209.16		3	5	-21.7861	1232.27	1828.41		3	13	-161.841	1737.44	3037.74		2	1	-5.07835	1854.99	2077.18		2	9	-32.3195	1540.17	1785.48		5	8	-72.5665	1325.63	2183.31		2	3
1	21	-254.716	2073.19	3301.89		3	5	-7.45564	1183.37	1324.14		2	5	-2.17818	1213.56	1559.17		3	6	-21.8201	1325.68	1832.04		4	1	-140.37	2331.14	3496.4		2	2	18.9836	2560.14	2919.45		2	10	-23.1938	1416.25	1574.37			13	-94.3472	1301.2	2324.22		2	4
1	22	-82.5478	1389.35	2053.77		3	6	-26.2048	1476.37	1676.97		2	6	-93.8658	1602.11	1990.35		3	7	-85.1504	1746.61	2341.42		4	2	-64.9629	1206.97	2001.82		2	3	-25.7318	1431.29	1532.36		2	11	27.0518	1505.36	1717.84			15	-100.374	1619.15	2387.25		2	5
2	1	-187.555	1443.06	2428.5		3	7	7.75218	2155.02	2387.57		2	7	3.679	1660.37	2104.81		3	8	-43.9388	1621.49	2321.04		4	3	-151.245	2256.76	3328.25		2	4	-35.0917	2802.13	3086.3		2	12	-41.7711	1597.38	1921.38								2	6
2	2	-151.104	1395.4	2407.91		4	1	-30.4093	1656.05	1909.49		2	8	-27.7522	2152.02	2758.64		3	9	-91.2043	1005.51	1408.73		4	4	-117.909	1401.06	2471.65		2	6	-21.7752	1912.27	2093.3		3	1	-62.7	2326.86	2690.88								2	7
2	3	-114.661	1811.6	2908.61		4	2	-24.3883	1201.5	1308.49		2	9	-17.537	2157.26	2785.66		3	10	-37.4432	955.422	1505.65		4	5	-81.202	1518.21	2363.54		2	7	-1.16986	1549.04	1660.73		3	4	-29.0852	2037.86	2302.56								2	8
2	4	-115.964	2170.46	3595.42		4	3	-18.9696	1389.88	1582.02		2	10	-6.63106	2341.66	3004.32								4	6	-83.5131	1674.73	2508.14		2	11	-32.1181	2081.8	2248.91		3	5	23.1118	1771.19	2065.32								2	9
2	5	-109.767	1662.25	2709.26		4	4	-21.2097	1458.24	1626.34														4	7	-102.054	1177.3	2039.06		2	14	-18.8436	1923.38	2088.41		3	6	19.8515	2080.7	2348								2	10
2	6	-62.4611	703.25	1547.93		4	5	-22.283	1658.34	1799.11														4	8	-131.702	2119.62	3357.78		2	15	-9.97437	2173.61	2273.59		3	7	-42.4756	2519.59	2916.5								2	11
2	7	-142.225	1158.63	2038.39		4	6	-6.21105	1247.85	1419.55														4	9	-107.228	2147.63	3345.33		2	17	-25.6656	1768.6	1998.32		3	8	5.25974	1817.54	2097.45								2	12
2	8	-231.441	1607.62	2794.76		4	7	-39.5936	2052.74	2218.93														4	10	-83.8869	1728.74	2497.78		2	18	-4.8774	1131.64	1252.65														2	13
2	9	-256.632	1271.85	2209.6		4	8	-32.8976	1991.42	2188.25														4	11	-127.221	1928.29	3484.76		2	20	-7.04006	1246.03	1370.73
2	10	-98.623	1547.23	2747.7		4	9	-24.7802	1404.42	1525.13																				2	21	-7.81128	1145.66	1297.09
2	11	-142.203	1360.34	2579.61																										2	23	-15.8731	1052.82	1268.16
2	12	-111.332	1289.15	2398.85																										2	25	-20.2836	1178.21	1311.71
2	13	-134.873	1507.79	2567.25																										2	28	-8.81376	1292.36	1490.33
																														2	30	-3.19811	1077.04	1205.42
[truncated: 8 more columns]

## Sheet: hypo L
		-119.25						-20.0941						-45.0544
20181102 hypo L		61.8389				20190306 hypo 10 L		14.5014				20190306 hypo 30 L		21.3535
pos	cell	dV/dt	Vi	Vmax		pos	cell	dV/dt	Vi	Vmax		pos	cell	dV/dt	Vi	Vmax
1	1	-316.307	2315.36	4013.4		1	1	-32.4597	1548.86	1908.16		1	1	-1.13774	1431.98	2127.03
1	2	-119.408	1061.58	1876.91		1	2	-46.3046	2049.78	2404.68		1	2	-62.6873	1067.66	1490.95
1	3	-64.6388	849.388	1550.98		1	3	-14.3627	1011.11	1093.56		1	4	-40.9397	1719.37	2378.56
1	4	-171.889	1490.79	2456.97		1	4	2.80805	2140.92	2512.67		1	5	-27.8678	1250.41	1752.27
1	5	-147.873	1034.71	1923.44		1	5	-15.9787	1246.54	1475.92		1	6	-45.6663	1178.34	1544.68
1	6	-174.532	1706.2	2783.37		1	6	-15.801	1510.5	1791.94		2	1	-78.7613	1558.14	1983.85
1	7	-145.826	2372.27	4152.49		1	7	-29.4072	1486.04	1737.38		2	2	-44.4425	1095.18	1481.39
2	1	-78.0781	1078.02	1825.71		1	8	-20.8763	989.433	1246.32		2	3	-57.7749	1251.49	1679.18
2	2	-117.18	1707.88	2886.63		1	9	-9.04057	1210.17	1364.96		2	4	-53.212	1024.78	1491.14
2	3	-98.0463	1670.51	2984.29		1	10	-5.54741	1295.28	1509.92		3	1	-66.6685	1933.56	2456.43
2	4	-246.706	3586.57	6176.18		1	11	-28.4706	1577.68	1869.47		3	2	-55.3414	1350.88	1739.3
2	5	-98.3908	1430.7	2181.15		1	12	6.04051	1176.1	1395.82		3	3	-52.1091	2087.52	2739.53
2	6	-64.0653	1042.07	1817.71		2	1	-27.7969	1879.19	2115.07		3	4	-53.3963	1037.62	1331.33
2	7	-135.373	1948.95	3397.86		2	3	-25.2115	1165.89	1375.4		3	5	-20.0309	992.299	1422.6
2	8	-120.989	1198.6	2077.64		2	4	-22.0117	1142.39	1331.24		4	2	0.654962	1622.11	2007.96
2	9	-108.954	1600.27	2646.84		2	5	-1.5762	1043.55	1179.55		4	3	-14.7725	1101.39	1295.12
3	1	-119.25	1681.17	2804.42		2	6	-23.8266	1943.73	2311.07		4	4	-71.1332	1736.63	2203.11
3	2	-212.871	2576.09	3801.67		2	7	-16.4746	1199.24	1421.52		4	5	-41.5422	1556.14	1971.37
3	3	-48.3794	862.001	1539.17		2	8	-41.5443	3318.87	3710.8		4	6	-22.848	1416.83	1774.66
3	5	-117.705	1263.41	1923.3		2	9	-20.0941	1747.34	1886.49		4	7	-28.6292	1360.82	1619.99
3	6	-128.752	1496.76	3012.13		2	10	-47.3119	4404.34	4921.7		5	1	0.56122	981.239	1270.76
3	7	-48.6958	1060.46	1749.98		2	11	-21.6652	1475.76	1666.24		5	2	-47.6359	1234.6	1597.19
3	8	-54.927	1297.93	2193.35		2	12	0.455898	1118.96	1266.04		5	3	-24.0799	1617.51	1955.48
3	9	-142.205	1029.71	1815.83		2	13	0.733882	905.095	1018.18		5	4	-48.667	2245.31	2729.34
3	10	-75.6592	1444.4	2301.23		2	14	-6.03591	1488.14	1680.63		5	5	-48.5698	1470.49	1934.68
												5	6	-26.6647	1366.03	1754.36
					-119.25						-20.0941							-45.0544
					61.8389						14.5014							21.3535

## Sheet: all
CONTROL	initial osmolarity (mOsm)	shock (mOsm)	delta V	V1/V0	Piso/P	P/Piso	adaptation speed, µm3/min	stdev		LAT	20181102, lat	initial osmolarity (mOsm)	shock (mOsm)	delta V	V1/V0	Piso/P	P/Piso	adaptation speed, µm3/min	stdev
20181102, c											hypo, 50%	346	177	71.7767	1.71777	1.9548	0.511561	-119.25	61.8389
											hyper, 10%	346	916	-49.4616	0.505384	0.377729	2.6474	31.431	17.9322
hypo, 50%	346	177	61.3957	1.61396	1.9548	0.511561	-162.467	67.8314
hyper, 10%	346	916	-45.9508	0.540492	0.377729	2.6474	46.3339	10.9443			20190306, lat
											hypo, 10%	383	354	12.9752	1.12975	1.08192	0.924282	-20.0941	14.5014
20181126, hypo											hypo, 30%	388	285	31.3571	1.31357	1.3614	0.734536	-45.0544	21.3535
10% H2O	344	311	11.4841	1.11484	1.10611	0.90407	-22.8823	13.1422
30% H2O	354	247	31.1503	1.3115	1.4332	0.69774	-27.7522	43.8468
40% H2O	351	227	41.6953	1.41695	1.54626	0.646724	-32.172	31.8708
50% H2O	360	180	67.1874	1.67187	2	0.5	-113.562	47.5345
20181206, hypo
10% H2O	348	314	10.0317	1.10032	1.10828	0.902299	-18.8436	14.9343
30% H2O	359	281	21.5935	1.21593	1.27758	0.78273	-36.2279	35.2237
50% H2O	358	187	63.2447	1.63245	1.91444	0.522346	-100.374	54.8235
20181218, hyper
1% PEG400	340	392	-9.66702	0.90333	0.867347	1.15294	14.6617	8.33104
2% PEG400	355	431	-14.6517	0.853483	0.823666	1.21408	26.549	9.58199
5% PEG400	347	575	-29.8549	0.701451	0.603478	1.65706	37.8674	10.8754
20190328, hypo
20% H2O	341	276	14.939	1.14939	1.23551	0.809384	-30.4512	21.0445
40% H2O	343	214	31.4945	1.31495	1.6028	0.623907	-65.339	32.1433
