# Supplementary material for: A mechano-osmotic feedback couples cell volume to the rate of cell deformation
Source: eLife journal article supplement (doi:10.7554/elife.72381), 2022-04-13
Supplement: supp [file dVdt.xlsx]

## Sheet: tau
CONTROL	Piso/P	tau median	tau stdev	n		LAT	Piso/P	tau median	tau stdev	n
hyper	0.876607	7.71091	3.23371	16		hypo Lat	1.10787	1.71169	0.392319	12
hyper	0.776765	5.53625	1.59818	15		hypo Lat	1.22581	2.66283	0.810696	7
hyper	0.613309	3.42482	0.484168	27		hypo Lat	1.35714	3.34576	0.104164	3
hyper	0.505935	1.10836	0.208	16		hypo Lat	1.5261	5.90511	1.6186	11
hyper	0.404028	0.754405	0.143514	12		hypo Lat	1.7757	3.35687	1.05608	12
hyper	0.179285	0.707867	0.128422	17
hypo	1.13636	0.804165	0.313735	8
hypo	1.25448	1.7104	0.374166	13
hypo	1.417	1.48239	0.445956	9
hypo	1.65877	2.7688	0.798655	3
hypo	2.01149	2.0131	0.747669	19

## Sheet: dV
CONTROL	Piso/P	dV %	stdev	n		LAT	Piso/P	dV %	stdev	n
hyper	0.876607	-5.78286	1.27545	16		hypo Lat	1.10787	8.64425	1.95161	12
hyper	0.776765	-9.59628	1.48796	15		hypo Lat	1.22581	18.7485	2.39025	7
hyper	0.613309	-25.5585	1.94182	27		hypo Lat	1.35714	35.0756	4.7798	3
hyper	0.505935	-34.6093	3.45842	16		hypo Lat	1.5261	32.9726	6.15757	11
hyper	0.404028	-43.536	1.11138	12		hypo Lat	1.7757	43.335	3.15707	12
hyper	0.179285	-55.2403	3.63453	17
hypo	1.13636	7.03951	1.28977	8
hypo	1.25448	16.9664	2.80537	13
hypo	1.417	21.7339	3.53158	9
hypo	1.65877	37.5151	1.31706	3
hypo	2.01149	42.4373	3.61314	19

## Sheet: dVdt slope
hyper	P/Piso	Piso/P	P abs	dV/dt	stdev	n			hypo C	P/Piso	Piso/P	P abs	dV/dt	stdev	n		hypo L	P/Piso	Piso/P	P abs	dV/dt	stdev	n		Analysis of individual cells was performed in Origin
-0.140762	1.14076	0.876607	376.452	-7.96949	3.12426	16			0.12	0.88	1.13636	290.4	60.3557	45.76	8			0.902632	1.10787	297.868	66.0708	60.3337	14
-0.28739	1.28739	0.776765	424.839	-15.5062	5.31218	15			0.202857	0.797143	1.25448	263.057	116.633	44.5614	12			0.815789	1.22581	269.211	73.8002	39.904	7
-0.630499	1.6305	0.613309	538.065	-63.8977	14.5032	27			0.294286	0.705714	1.417	232.886	129.027	49.9147	9			0.736842	1.35714	243.158	180.908	9.55426	3
-0.97654	1.97654	0.505935	652.258	-256.198	60.4001	16			0.397143	0.602857	1.65877	198.943	161.023	12.1336	3			0.655263	1.5261	216.237	47.298	12.1165	11
-1.47507	2.47507	0.404028	816.774	-539.332	148.962	13			0.502857	0.497143	2.01149	164.057	329.006	92.5812	19			0.563158	1.7757	185.842	152.034	57.4009	12
-4.57771	5.57771	0.179285	1840.65	-679.406	217.542	17			1	0		0	544.624	129.651	14
