# Supplementary material for: A mechano-osmotic feedback couples cell volume to the rate of cell deformation
Source: eLife journal article supplement (doi:10.7554/elife.72381), 2022-04-13
Supplement: supp [file dVdt_dAdt.xlsx]

## Sheet: Sheet1
dV/dt (µm3/min)	dA/dt (µm2/min)
-14.6345	50.9602
-26.6331	123.278
-19.4179	58.9819
-8.3888	82.6992
-6.59891	57.1836
3.43668	102.153
-3.04522	50.3078
-16.9977	99.8669
-2.08864	29.656
-7.43653	58.8146
-0.784203	31.0109
-23.1065	72.4395
-8.03323	38.4161
-8.78808	23.2133
-5.38707	33.5524
-13.06	44.5128
-15.3471	67.2921
-40.7412	124.961
-22.2576	88.3306
1.16247	37.8185
