# Supplementary material for: A mechano-osmotic feedback couples cell volume to the rate of cell deformation
Source: eLife journal article supplement (doi:10.7554/elife.72381), 2022-04-13
Supplement: supp [file dVdt_dAdt.xlsx]

## Sheet: median
control	89	89		89	89															Y-27	85	85		85	85			CK-666	38	38		36	36
	6.15563	23.245		-7.60337	20.9288																1.69521	33.8861		-5.10039	24.2203				8.73182	19.9042		-3.79007	9.76507
	11.4976	11.2739		9.26384	15.2672																6.61388	15.5861		5.54023	14.3104				7.71371	9.2709		7.23547	8.16479						10 min before dV/dt i
C	10 min before dV/dt i	10 min before dA/dt i		10 min after dV/dt i	10 min after dA/dt i		C	before lamellipodia	dA/dt	stdev	dV/dt	stdev		after lamellipodia	dA/dt	stdev	dV/dt	stdev		Y-27	10 min before dV/dt i	10 min before dA/dt i		10 min after dV/dt i	10 min after dA/dt i			CK-666	10 min before dV/dt i	10 min before dA/dt i		10 min after dV/dt i	10 min after dA/dt i						control	Y-27	CK-666
	2.08959	6.3357		-23.0577	-4.07153				7.71796	1.14396	1.76198	4.25988			1.51061	2.41677	1.47302	7.41696			-1.37458	7.80913		-2.96964	2.53775				-1.52566	4.89782		-0.868665	0.732924						89	85	38
	-2.86537	6.52627		6.03102	-1.80042				12.5479	1.31123	0.563995	3.75763			8.12218	1.50901	-2.53796	3.67025			-7.86797	10.6067		-1.01299	3.43559				6.02697	6.38184		3.42309	0.7771						6.15563	1.69521	8.73182
	8.26839	7.3041		0.193954	-0.351378				17.9005	1.53673	2.27522	6.21143			12.4392	1.35573	-1.89826	5.07143			1.59685	11.9221		3.0528	5.55405				1.51771	7.35514		4.89052	0.85						11.4976	6.61388	7.71371
	1.76198	7.59933		4.15216	0.418682				22.5559	1.06647	8.61811	12.4797			17.6597	1.31592	-4.62061	5.82437			0.305619	12.182		-0.265313	5.72633				1.51414	7.97769		2.19068	1.00274
	-0.553437	7.71796		1.47302	1.01133				26.4384	1.54484	12.1456	11.6901			21.9677	1.47133	-10.5493	8.54964			4.27521	15.4094		-2.87716	8.01051				3.72013	9.82517		0.874062	1.57565
	5.9341	8.84768		0.514251	1.25977				33.5978	2.59016	15.7737	13.0711			26.7616	1.57125	-11.3764	7.61138			7.04555	15.5581		-6.66123	8.71429				2.64929	9.84691		-0.420599	1.77755						10 min before dA/dt i
	0.599459	8.9943		-0.436557	1.51061				49.0286	3.77218	9.53378	17.5136			34.882	2.28276	-15.852	8.90171			-5.47572	15.695		-2.01618	8.8458				10.1955	11.6831		5.14779	1.93576						control	Y-27	CK-666
	-4.86123	9.30756		5.5412	2.13391										47.9029	10.355	-18.5127	8.98507			1.9545	16.5599		-1.22426	9.71416				1.22748	11.8076		-0.0486155	2.24949						89	85	38
	7.40926	9.64412		2.88604	2.75916																0.667905	17.0711		5.53326	10.0318				7.83697	12.4951		4.24923	2.28818						23.245	33.8861	19.9042
	9.02775	10.61		6.66739	2.81919																-0.708129	17.3524		-1.92808	10.4682				8.76441	13.1233		-0.592069	2.52437						11.2739	15.5861	9.2709
	0.563995	11.4406		5.34454	3.39227																-0.406164	17.8458		-6.86867	11.0313				13.7508	13.3302		-1.91563	2.8966
	3.8573	11.8256		-4.1436	4.80469		Y-27	before lamellipodia	dA/dt	stdev	dV/dt	stdev		after lamellipodia	dA/dt	stdev	dV/dt	stdev			3.68099	18.2922		-2.71019	11.3352				8.48712	13.3485		0.726656	4.41429
	-1.14509	11.826		0.913239	4.805				11.2644	1.73465	-0.534479	3.63898			6.86842	2.48911	-1.62022	2.57487			7.07075	18.771		-5.25826	11.4626				13.1295	15.891		1.46334	4.51395						10 min after dV/dt i
	6.2611	12.2401		0.365487	5.02382				17.3524	1.35762	1.08054	3.60291			13.2446	1.61259	-2.71019	3.54003			-1.72263	18.7971		-3.03741	11.7046				7.44797	15.8985		-4.13458	4.69236						control	Y-27	CK-666
	-1.65469	12.2922		-0.630713	5.3771				22.7142	1.55625	0.801204	6.60445			18.0129	1.47832	-3.47191	4.02622			1.08054	19.497		0.210389	12.2118				4.8061	16.2808		-9.64415	5.14829						89	85	36
	-3.58987	12.5479		-1.12295	7.04959				28.1803	1.52085	2.21882	2.77226			21.1179	1.3989	-3.83962	3.61197			6.56533	20.061		-11.1934	12.9383				5.7776	16.6057		10.0502	5.86835						-7.60337	-5.10039	-3.79007
	-3.5846	12.8346		-3.89041	7.28433				32.0666	1.20611	-0.208973	3.01297			31.0644	3.62739	-5.88945	2.63136			-3.75965	20.2241		-2.92455	13.0439				9.87408	16.7678		-6.52218	6.1201						9.26384	5.54023	7.23547
	0.988756	14.1491		-2.53796	7.70033				37.6534	1.4353	3.20759	9.52174			46.8632	10.7199	-8.42029	9.10082			-0.279596	20.8939		-3.8022	13.2446				14.357	17.1128		-0.592963	7.36061
	4.48848	14.1596		-0.524072	8.12218				44.078	2.34087	3.97698	6.3952									-3.40547	21.6156		-0.271362	13.6942				10.2134	18.1583		-7.32605	7.63079
	0.516922	14.1656		-3.05473	9.05547				56.9852	10.2033	0.401854	8.65245									1.55139	21.6159		1.48803	13.9398				16.4867	19.017		1.30312	7.93459						10 min after dA/dt i
	1.03283	14.6976		-7.26948	9.12812																2.06498	21.7372		-2.70887	14.4677				3.56301	20.5769		-3.79215	8.44083						control	Y-27	CK-666
	-3.11976	14.8383		-10.1413	9.1474																-1.0187	22.0839		0.480666	14.6501				-3.9604	21.0541		-0.13225	10.0732						89	85	36
	3.99465	15.001		-6.62397	9.31487																-10.2244	22.1773		-5.39023	14.6842				14.5914	21.2433		-0.0989696	11.1673						20.9288	24.2203	9.76507
	4.80058	15.0483		3.18604	9.57913		CK-666	before lamellipodia	dA/dt	stdev	dV/dt	stdev		after lamellipodia	dA/dt	stdev	dV/dt	stdev			2.51426	22.7142		-7.42187	14.75				19.3982	22.0605		-5.46312	11.3159						15.2672	14.3104	8.16479
	-0.98106	15.428		3.41632	10.2248				7.66642	1.7753	2.0835	2.30552			2.09262	1.33616	0.800359	2.59714			-1.85992	23.5886		-1.92238	14.7792				17.8105	22.7118		-13.6406	12.4317
	6.91511	16.0671		0.0856136	10.3773				12.8092	0.688099	8.62576	3.73619			7.36061	1.12921	-3.79215	6.1835			13.9869	23.6986		-2.81798	14.9469				7.41367	24.0509		-10.226	13.0535
	-3.27075	16.4118		-1.89826	10.6243				16.6868	1.03582	10.0438	3.90012			13.0535	3.42262	-5.46312	6.88788			17.8306	23.7328		-2.23005	14.9516				20.0113	24.2509		-4.07946	13.5927
	4.73446	17.0641		-6.66806	11.6083				24.2509	2.40226	8.8307	10.4472			23.6448	3.19255	-9.91146	7.22052			9.11988	24.0069		-1.666	15.2117				8.40586	24.4057		-0.921219	17.0951
	9.68841	17.1231		-3.73323	12.1255				34.1201	6.05607	6.89937	6.86863									1.7097	24.4269		-8.51767	15.2169				14.2242	24.6072		-17.8565	19.5708						Vi	stdev	n
	-1.0434	17.2497		-6.95673	12.4392																-3.24757	24.523		-1.96681	16.4344				-4.74633	26.534		-17.8565	19.5708					control	1626.97	746.361	90
	-4.49788	17.6887		3.00159	12.6062																0.801204	24.933		-7.1568	17.1996				36.1155	26.5663		-9.49992	20.326					Y-27	1417.69	416.068	85
	6.59072	17.9005		-15.5437	13.1098																-0.313546	24.9588		-0.0608425	17.9724				8.8307	26.5996		0.729977	20.4833					CK-666	1355.93	429.134	38
	2.27522	18.2121		-1.25872	13.6439																0.312076	25.9971		-0.335449	18.0534				6.80539	28.6225		-10.1846	23.4275
	1.06304	18.613		-0.809506	13.7531																-2.04315	26.495		-10.777	18.5694				17.4369	31.8914		-9.63827	23.862
	-0.262398	18.6288		-2.59193	14.3562																3.40137	27.1723		-1.47969	18.797				6.89937	34.1201		-24.0289	24.9954
	-10.0297	18.7315		6.58104	15.6091																2.36819	29.1883		-10.7763	19.0532				6.89937	34.1201		-12.007	29.8429
	17.6042	18.8147		-9.71526	15.799																2.06946	29.4549		-4.977	19.6311				-3.95197	36.2982
	1.60606	19.3064		-4.62061	15.9678																7.00173	29.8414		-6.45006	20.1499				9.80485	48.8413
	-2.03498	19.5661		-3.06664	17.6597																5.36118	30.7731		-6.77668	20.1567
	11.7807	19.8176		-2.21369	17.691																-5.95797	31.2594		-5.52379	20.1965
	7.77003	19.9978		-12.8805	18.6204																-0.865109	31.2851		-10.72	20.2812
	9.82919	21.2664		-7.75911	19.1079																3.02845	31.635		0.0273487	20.3336
	-23.6334	21.596		-12.6689	20.2245																1.84245	31.7741		-3.83962	20.4659
	4.22487	21.8413		-10.5493	20.2307																0.447164	32.042		1.07539	20.6348
	3.22982	21.8896		-5.78057	20.2522																2.95361	32.0912		-9.3611	20.6869
	8.61811	22.0804		-13.0677	20.2805																-0.92243	32.9877		-3.31463	21.1179
	7.75173	22.1117		1.05422	20.5602																1.1916	33.5822		-3.83921	21.9082
	12.9764	22.458		-18.2177	20.8041																-3.6059	33.8703		-2.54615	21.9379
	9.9379	22.5559		-6.14639	21.2749																-1.11314	34.2953		-8.79578	22.5953
	9.6623	22.959		-23.4781	21.9677																-2.4384	34.3161		-0.971686	22.7807
	2.27643	23.3756		-22.9288	22.0264																-13.5592	35.4023		1.85544	22.8653
	9.95653	23.4505		-2.53084	22.4058																3.05427	35.4661		-1.36629	23.2668
	23.7319	23.6268		-1.81903	22.6932																-2.40891	36.651		-6.0668	24.0829
	-2.70453	24.2657		2.11144	22.7774																7.50422	36.7558		-7.42326	24.3141
	9.6315	24.4576		-15.4267	24.0541																7.76682	37.2966		-8.08686	25.0388
	-25.1578	24.8051		-3.69858	24.1758																26.8132	37.5126		-9.05688	25.0537
	17.0901	25.2425		-23.1333	24.4816																4.7804	37.7943		-6.52377	25.4087
	-1.52864	25.2763		-13.3055	25.1155																3.58141	38.1272		-4.3144	26.173
	10.9672	25.3983		-13.51	25.2187																-7.6248	38.613		-0.0353283	26.7771
	21.8499	25.7518		-17.01	25.314																2.30853	39.5344		-6.1806	27.2984
	13.7034	25.945		-6.95393	25.647																-4.72128	39.6262		-7.59616	29.4763
	-19.5344	25.9467		-15.2572	25.7753																3.36092	39.7402		-8.18808	30.4917
	12.2754	25.9509		-25.4102	26.6779																-1.45216	40.2236		-2.04623	30.9467
	12.1456	26.4384		-12.0816	26.7173																-3.17161	40.3098		-2.8172	31.1821
	2.18202	26.7564		-11.4	26.806																9.66002	42.2369		-5.05893	32.3563
	8.10669	26.8649		5.78352	27.4016																15.5046	42.4243		-8.98954	32.889
	30.0957	28.7985		-7.00197	27.8124																-4.22877	44.078		-6.59123	33.1521
	-0.384773	28.9255		-6.7536	28.0921																3.97698	44.4835		-2.66119	33.2374
	16.6321	29.0907		-11.3527	29.3134																4.44544	44.8578		-1.16918	33.8949
	8.65141	29.1321		3.05533	29.6517																-2.56788	44.9099		-4.47331	34.7826
	24.5062	29.4577		-5.78986	29.6746																7.92083	48.0299		-5.59831	35.5125
	15.7737	30.8329		-7.48416	30.4438																-3.97246	50.339		-6.43974	35.8131
	16.5855	31.5453		-9.20819	30.8249																10.0242	52.0966		-0.204243	40.4868
	16.3205	32.8737		0.574897	32.7327																10.946	52.3568		-3.82331	40.8105
	-6.45292	33.524		-30.2539	34.833																1.55954	54.3955		-14.0512	41.1877
	7.32571	33.5978		-19.3542	34.931																-4.50026	55.1441		-9.1681	43.3498
	7.85153	36.5167		-19.7335	35.6864																24.4103	55.955		-6.97391	44.4842
	21.1525	37.1879		-12.3499	36.3799																0.391891	56.6629		-6.7345	46.3133
	-2.0091	37.3235		-19.5923	36.7057																3.07619	57.3075		-11.9447	46.8632
	40.8795	38.3335		-16.8669	42.7685																8.17579	62.2995		-6.09934	49.8557
	46.5798	42.2994		-7.70398	44.4067																-8.49416	63.6934		-8.42029	54.4397
	9.53378	43.8905		-24.2727	46.3942																0.411817	65.1808		-25.1019	57.9553
	19.3648	44.8785		1.95819	47.3541																-2.31969	66.5847		-6.72153	59.3223
	5.44853	47.234		-22.8823	47.3776																-9.48992	78.5455		-14.3812	59.3475
	6.29264	49.0286		-13.6524	48.4282																-2.2589	87.261		-35.5846	80.0331
	37.9905	49.1		-24.1235	50.8151
	10.0432	49.2453		-31.0303	55.6291
	-15.0959	52.3255		-14.5015	58.7522
	5.04924	54.774		-20.1585	79.9722

## Sheet: control
	pos	cell	Vi	t of V loss	deltaV% at t of V loss		A at t of V loss	t of 90	deltaV% at t of 90	-deltaV	deltaS% at t of 90	A at 90	dV/dt i	dA/dt i	10 min before dV/dt i	10 min before dA/dt i	10 min after dV/dt i	10 min after dA/dt i			A at 90	dV/dt i	dA/dt i	10 min before dV/dt i	10 min before dA/dt i	10 min after dV/dt i	10 min after dA/dt i		Vi	deltaV% at t of V loss								Y-27	-deltaV	deltaS% at t of 90			CK-666	-deltaV	deltaS% at t of 90
20180719 RPE1 ricm 1	1	2	2842.49	28	18.1918	-18.1918	1178.39	14	-1.21267	1.21267	8.48262	250.967	0.490927	8.93587	1.03283	14.6976	-61.8024	89.9539		mean	194.981	1.0814	19.923	6.3348	24.296	-8.20558	21.6957		1626.97	8.78517														5.13078	13.4896
20180719 RPE1 ricm 1	1	3	2083.05	50	6.61382	-6.61382	668.864	8	-3.12192	3.12192	11.9675	231.622	5.31123	22.3215	9.82919	21.2664	-2.59193	14.3562		stdev	60.8262	9.39539	12.5403	11.5578	14.9668	10.8232	16.818												6.20964	12.8655				2.68543	11.1575
20180719 RPE1 ricm 1	1	5	1481.86	26	12.9012	-12.9012	336.46	19	0.0619269	-0.0619269	7.83271	163.81	-5.92957	1.54295	8.26839	7.3041	-15.4267	24.0541																					-1.93922	12.2481				15.5227	19.604
20180719 RPE1 ricm 1	1	6	851.416	47	-0.285701	0.285701	372.654	6	-9.85507	9.85507	15.3901	124.183	9.74303	21.6299	13.7034	25.945	4.15216	0.418682																					-3.0252	7.56366				11.4647	15.5984
20180719 RPE1 ricm 1	1	7	3083.7	39	11.9931	-11.9931	1252.55	7	-3.83959	3.83959	10.9114	278.529	-10.7991	51.3889	16.3205	32.8737	-31.0303	55.6291																					1.84234	13.311				21.5795	20.8312
20180719 RPE1 ricm 1	2	3	1014.04	55	10.1026	-10.1026	431.626	12	0.0430887	-0.0430887	10.8713	148.417	0.0667864	5.2648	-1.14509	11.826	5.34454	3.39227																					0.0315401	12.9839				9.49814	13.0137
20180719 RPE1 ricm 1	2	4	1758.85	22	20.5239	-20.5239	905.738	3	2.40973	-2.40973	11.1534	229.022	-23.4999	49.304	-15.0959	52.3255	-24.2727	46.3942			Vi	stdev	n																					0.66135	10.1679
20180719 RPE1 ricm 1	2	6	1397.62	50	3.64426	-3.64426	546.033	8	-6.05283	6.05283	11.1103	153.305	9.98137	21.0531	9.9379	22.5559	-1.89826	10.6243			1626.97	746.361	90																-0.328471	12.3481				4.81463	10.6902
20180719 RPE1 ricm 1	2	7	2101.59	20	5.30593	-5.30593	570.89	7	-5.57528	5.57528	13.7496	236.822	-0.497442	33.7957	15.7737	30.8329	-15.2572	25.7753																					1.47432	13.7472				8.57275	15.3972
20180719 RPE1 ricm 1	2	8	1125.21	36	8.83588	-8.83588	404.584	10	-0.656051	0.656051	14.0854	177.435	2.27643	23.3756	2.27643	23.3756	-2.53796	7.70033																					0.949409	12.9555				5.20857	15.841
20180719 RPE1 ricm 1	2	9	2189.86	30	13.9209	-13.9209	840.162	8	-4.58821	4.58821	11.2721	220.597	13.7257	25.3983	10.9672	25.3983	-23.4781	21.9677																					-1.35878	11.9047				5.00945	13.5451
20180719 RPE1 ricm 1	2	10	1228.61	54	15.7937	-15.7937	539.168	13	-0.538987	0.538987	9.26915	153.617	3.10195	8.331	-1.0434	17.2497	-3.05473	9.05547																					-1.28279	9.44186				4.8272	11.4821
20180719 RPE1 ricm 1	2	11	1199.88					25	-24.8042	24.8042	24.8119	162.978	17.4123		9.68841	17.1231	0.0856136	10.3773																					0.455525	9.24528				10.2901	13.992
20180719 RPE1 ricm 1	3	1	1499.91	42	5.13959	-5.13959	702.562	20	-10.1891	10.1891	14.315	168.386	5.96855		12.2754	25.9509	-17.01	25.314																					2.00512	9.67491				10.2901	13.992
20180719 RPE1 ricm 1	3	2	1704.94	30	5.53356	-5.53356	689.561	8	-11.3437	11.3437	15.0061	183.467	18.0024	26.0917	23.7319	23.6268	-13.0677	20.2805																					0.927473	11.1328				8.49903	13.4683
20180719 RPE1 ricm 1	3	6	1396.95	41	10.8453	-10.8453	825.81	12	-5.24663	5.24663	12.6674	172.65	5.70197	8.1853	5.9341	8.84768	-1.25872	13.6439																					-0.43648	7.36227				8.89851	14.1431
20180719 RPE1 ricm 1	4	2	2300.66	23	13.6711	-13.6711	791.28	7	-0.877335	0.877335	9.38941	168.386	-11.6356	35.1967	-0.384773	28.9255	-22.8823	47.3776																					-4.05506	6.61166				9.41767	13.5297
20180719 RPE1 ricm 1	4	4	3816.55	46	7.55581	-7.55581	1608.82	14	0.479018	-0.479018	14.7712	418.521	-1.18082	19.717	-6.45292	33.524	3.05533	29.6517																					4.56766	12.5291				7.68957	13.6744
20180719 RPE1 ricm 1	4	5	1829.9	22	7.51514	-7.51514	613.533	14	-2.80344	2.80344	16.1597	418.521	8.2969	5.68708	0.988756	14.1491	-16.8669	42.7685																					0.94046	9.30629				-1.73784	7.30583
20180719 RPE1 ricm 1	7	1	2969.63	34	-0.206558	0.206558	1409.6	7	-9.78511	9.78511	17.0674	310.459	15.4945	51.936	40.8795	38.3335	-13.6524	48.4282																					-1.84017	8.87782				8.55503	12.4729
20180719 RPE1 ricm 1	7	2	4775.09	60	9.49926	-9.49926	1510.38	22	-6.3332	6.3332	10.8321	337.188	18.2772	16.7848	4.48848	14.1596	3.18604	9.57913																					-1.8989	13.4409				10.9137	16.5612
20180719 RPE1 ricm 1	7	3	3002.43	60	3.35873	-3.35873	1506.01	5	-6.13611	6.13611	12.5582	277.905	15.2447	48.5318	37.9905	49.1	-7.70398	44.4067																					-1.58387	14.535				1.87694	12.4006
20180719 RPE1 ricm 1	7	4	1559.1	23	2.66683	-2.66683	390.543	11	-7.34679	7.34679	11.7655	163.498	7.76605	10.8064	9.95653	23.4505	-15.5437	13.1098																					0.336363	11.4302				2.47831	17.555
20180719 RPE1 ricm 1	8	1	1519.03	25	11.8446	-11.8446	597.204	11	0.655449	-0.655449	12.3762	209.365	0.495093	10.939	-3.11976	14.8383	-9.20819	30.8249																					3.16041	15.9411				-1.18574	7.24128
20180719 RPE1 ricm 1	8	2	1272.25	19	15.516	-15.516	512.543	4	2.70191	-2.70191	8.46609	166.306	-13.2563	24.7459	-10.0297	18.7315	-13.51	25.2187																					7.38601	21.8538				6.95748	13.0166
20180719 RPE1 ricm 1	8	3	1619.7	52	2.24873	-2.24873	958.522	11	-10.3272	10.3272	15.5732	189.707	15.6049	20.189	12.9764	22.458	-11.3527	29.3134																					4.44752	11.5365				16.3595	20.1393
20180719 RPE1 ricm 1	8	4	3036.57	54	17.0687	-17.0687	1234.24	9	0.625189	-0.625189	7.90927	270.832	-2.99179	19.5661	-2.03498	19.5661	-22.9288	22.0264																					1.31756	9.22768				7.03466	15.394
20180719 RPE1 ricm 1	8	5	1244.08	23	0.458857	-0.458857	421.329	11	-8.00987	8.00987	14.2889	159.754	9.62861	9.6726	8.61811	22.0804	-11.4	26.806																					6.79916	12.2373				13.2271	17.9416
20180719 RPE1 ricm 1	8	6	920.684	34	5.37378	-5.37378	289.761	15	-4.93849	4.93849	14.7996	145.401	4.60711	6.47217	0.563995	11.4406	-6.66806	11.6083																					4.07353	17.7769				-0.820447	7.26166
20180719 RPE1 ricm 1	9	1	1836.34	43	14.4243	-14.4243	1426.24	6	-2.86217	2.86217	11.0197	204.684	-12.8864	28.1894	9.6315	24.4576	-24.1235	50.8151																					6.68219	16.9301				8.67016	16.5606
20180719 RPE1 ricm 1	9	2	2067.52	39	8.94782	-8.94782	763.718	16	-0.207215	0.207215	8.87609	204.684	-0.164088	9.1525	1.06304	18.613	-7.00197	27.8124																					6.36864	11.724				17.0976	19.8647
20180719 RPE1 ricm 1	10	1	2341.34	30	8.93803	-8.93803	789.407	11	-3.98497	3.98497	12.8542	254.919	11.2463	18.4925	6.59072	17.9005	-23.1333	24.4816																					-2.4524	7.67156				14.5427	16.5451
20180719 RPE1 ricm 1	10	3	1046.3	50	4.48826	-4.48826	425.698	18	-3.39577	3.39577	10.3791	133.44	0.957776	2.47015	1.76198	7.59933	5.5412	2.13391																					-0.663787	12.2818				9.13733	13.3647
20180719 RPE1 ricm 1	10	4	1051.37	33	10.1285	-10.1285	477.181	8	-8.43995	8.43995	13.1528	131.88	11.9157	24.0165	12.1456	26.4384	-10.1413	9.1474																					2.97559	17.4574				6.96933	11.7137
20180719 RPE1 ricm 2	1	1	1486.53	42	21.2177	-21.2177	616.029	5	7.71955	-7.71955	4.53009	176.603	-18.0377	27.1252	-19.5344	25.9467	-1.81903	22.6932																					3.1063	9.46889				5.36302	15.5395
20180719 RPE1 ricm 2	1	2	789.979					24	-5.40186	5.40186	12.6879	117.631	-4.22518	2.24049	2.08959	6.3357	1.47302	1.01133																					-0.826953	11.7603				17.6623	18.3266
20180719 RPE1 ricm 2	1	3	1066.55	44	16.7828	-16.7828	606.564	9	-5.43534	5.43534	14.6339	157.361	6.65694	19.9978	7.77003	19.9978	-7.75911	19.1079																					-1.09851	7.40047				8.80973	14.3769
20180719 RPE1 ricm 2	2	1	681.319					18	-18.4491	18.4491	27.9723	145.089	5.19244	16.9327	2.27522	18.2121	6.66739	2.81919																					0.719183	9.01766				0.603036	15.2853
20180719 RPE1 ricm 2	2	2	1419.96	30	14.992	-14.992	590.86	4	1.15348	-1.15348	10.944	191.476	-5.72491	28.1297	-2.0091	37.3235	-2.21369	17.691																					4.23048	15.1822
20180719 RPE1 ricm 2	2	3	1113.77	39	10.1062	-10.1062	542.809	11	-1.95293	1.95293	14.116	171.818	0.268007	9.00268	-3.5846	12.8346	-9.71526	15.799																					2.16666	15.7857
20180719 RPE1 ricm 2	2	4	869.688	11	11.1982	-11.1982	61.676	17	12.1221	-12.1221	4.68739	138.952	-11.0789	1.78491	-0.553437	7.71796	2.88604	2.75916																					2.68039	9.96772
20180719 RPE1 ricm 2	2	5	2237.59	46	5.53642	-5.53642	1027.89	17	-2.33236	2.33236	17.5506	304.426	7.23488	13.0714	-4.49788	17.6887	-7.48416	30.4438																					8.9992	13.8057
20180719 RPE1 ricm 2	2	6	1065.9	44	5.53761	-5.53761	468.964	11	-8.14946	8.14946	16.2685	157.777	6.39589	4.83995	3.8573	11.8256	-7.26948	9.12812																					3.03129	12.0589
20180719 RPE1 ricm 2	2	7	1759.21	18	2.8234	-2.8234	520.551	8	-3.10279	3.10279	14.0694	226.838	5.81274	36.6986	7.32571	33.5978	-12.0816	26.7173																					7.66086	18.5099
20180719 RPE1 ricm 2	2	8	903.387					13	-7.79014	7.79014	18.5982	156.009	3.47579	17.2479	4.80058	15.0483	-0.524072	8.12218				10 min before dV/dt i	stdev	10 min before dA/dt i	stdev	10 min after dV/dt i	stdev	10 min after dA/dt i	stdev	n	Vi	stdev							7.37754	22.4544
20180719 RPE1 ricm 2	2	9	1452.4	26	5.63349	-5.63349	429.13	13	-6.60276	6.60276	11.9838	162.874	13.8326	25.2425	17.0901	25.2425	-18.2177	20.8041		control	20180719 RPE1 ricm 1	7.42956	11.2172	22.2692	10.1369	-11.3764	13.0108	24.2678	18.5926	34	1662.32	879.794							-1.22247	13.2253
20180719 RPE1 ricm 2	3	1	2519.29	16	11.5806	-11.5806	332.612	13	7.72362	-7.72362	3.58478	239.214	-32.5497	38.0764	-25.1578	24.8051	3.41632	10.2248		control	20180719 RPE1 ricm 2	5.24889	12.115	20.7969	12.3125	-3.81182	8.68667	17.6753	13.6162	48	1402.41	549.652							-1.55251	6.39894
20180719 RPE1 ricm 2	3	2	1155.71	25	4.19759	-4.19759	231.622	22	-3.79482	3.79482	14.0845	168.802	-12.1385	32.7327	7.85153	36.5167	0.574897	32.7327		control	20180719 RPE1 ricm 3	2.41794	8.98757	24.771	31.379	-5.96348	6.91957	20.4062	20.9563	8	1104.8	764.912							5.69027	14.4838
20180719 RPE1 ricm 2	3	3	2855.03	45	12.2375	-12.2375	1528.89	7	-2.5799	2.5799	13.3101	307.546	-5.28681	70.2995	10.0432	49.2453	-14.5015	58.7522																					1.33218	18.9474
20180719 RPE1 ricm 2	3	5	2078.43					16	-5.07838	5.07838	12.0075	218.413	0.17716	4.04772	6.91511	16.0671	1.95819	47.3541																					10.4298	16.6462
20180719 RPE1 ricm 2	3	6	1060.72	31	6.41823	-6.41823	731.892	2	-5.95092	5.95092	14.9859	157.153	2.30875	21.6229	21.8499	25.7518	-2.53084	22.4058																					15.7983	25.3891
20180719 RPE1 ricm 2	3	7	927.785	26	4.47346	-4.47346	263.656	14	-2.08002	2.08002	10.8292	131.672	-0.512146	17.1251	3.99465	15.001	-3.73323	12.1255																					4.60485	18.5847
20180719 RPE1 ricm 2	3	8	2643.88	60	15.1991	-15.1991	1239.86	21	-1.86472	1.86472	9.49954	248.159	-0.15347	4.58449	7.40926	9.64412	-6.95393	25.647																					3.93685	17.3942
20180719 RPE1 ricm 2	3	9	2138.69					14	-9.3463	9.3463	13.1583	204.476	19.1094	18.8147	17.6042	18.8147	-19.7335	35.6864																					4.53131	22.5514
20180719 RPE1 ricm 2	4	1	1128.85					24	-17.0531	17.0531	18.1672	137.496	11.5933	12.8611	9.02775	10.61	-0.436557	1.51061																					9.62181	21.8497
20180719 RPE1 ricm 2	4	2	1658.5					19	-2.87828	2.87828	10.5364	186.275	1.5222	13.8148	0.516922	14.1656	2.11144	22.7774																					3.03638	12.9997
20180719 RPE1 ricm 2	4	3	1712.48					11	-4.99119	4.99119	10.5508	176.499	1.48248	23.7009	9.6623	22.959	5.78352	27.4016																					-1.21964	20.576
20180719 RPE1 ricm 2	4	4	1650.41					18	-9.38755	9.38755	14.0218	181.491	2.55644	6.83683	-2.86537	6.52627	-6.95673	12.4392																					8.13786	29.5708
20180719 RPE1 ricm 2	4	5	1696.06	23	8.27926	-8.27926	680.825	7	-10.8713	10.8713	15.0034	185.963	-12.4564	37.8006	46.5798	42.2994	-30.2539	34.833																					0.802689	18.5343
20180719 RPE1 ricm 2	5	1	1622.54					17	-6.42946	6.42946	12.4842	181.803	5.69798	7.8026	6.2611	12.2401	-0.809506	13.7531																					0.512644	10.2573
20180719 RPE1 ricm 2	5	2	1446.04	56	8.31747	-8.31747	760.494	14	-2.8209	2.8209	9.0109	155.385	-4.40237	6.60516	-4.86123	9.30756	-5.78986	29.6746																					5.27135	16.3195
20180719 RPE1 ricm 2	5	3	1770.72	51	6.58936	-6.58936	1156.55	7	-9.24431	9.24431	14.9409	201.356	9.14521	30.193	24.5062	29.4577	-19.3542	34.931																					1.03215	12.6763
20180719 RPE1 ricm 2	5	4	804.535					12	-9.03762	9.03762	15.8795	125.536	5.48506	13.683	16.5855	31.5453	0.913239	4.805																					-2.89855	17.5996
20180719 RPE1 ricm 2	5	6	1010.03					7	-3.92004	3.92004	10.5831	129.488	0.632539	22.421	7.75173	22.1117	-3.06664	17.6597																					0.825099	11.3334
20180719 RPE1 ricm 2	5	7	1534.96	49	6.74114	-6.74114	654.511	19	-13.5946	13.5946	18.4191	192.204	11.8835	19.488	11.7807	19.8176	-25.4102	26.6779																					4.03676	12.3537
20180719 RPE1 ricm 2	6	1	925.552	44	7.04613	-7.04613	340.412	15	1.42173	-1.42173	10.6098	142.905	4.09554	15.2165	5.44853	47.234	0.514251	1.25977																					4.83144	10.4531
20180719 RPE1 ricm 2	6	3	1122.09	54	5.56883	-5.56883	403.024	11	1.19391	-1.19391	16.1907	195.324	-3.254	15.428	-0.98106	15.428	6.03102	-1.80042																					6.56532	11.3936
20180719 RPE1 ricm 2	6	4	963.626					8	-4.72357	4.72357	16.7557	162.146	-0.164758	20.2989	2.18202	26.7564	-0.630713	5.3771																					9.65056	16.2981
20180719 RPE1 ricm 2	6	5	1932.71	33	8.09259	-8.09259	705.058	19	2.42533	-2.42533	8.69142	220.389	-5.2746	6.85581	-3.58987	12.5479	-12.3499	36.3799																					3.90764	14.4706
20180719 RPE1 ricm 2	6	7	2154.72	57	4.22783	-4.22783	1489.47	7	-6.49563	6.49563	15.4482	253.671	0.568675	33.7984	21.1525	37.1879	-19.5923	36.7057																					4.94782	15.0125
20180719 RPE1 ricm 2	6	8	982.277	27	6.64903	-6.64903	407.6	8	-2.95839	2.95839	15.0211	159.962	-3.05397	22.562	4.22487	21.8413	-4.62061	15.9678																					3.89853	11.4412
20180719 RPE1 ricm 2	6	9	856.517	29	3.37273	-3.37273	347.173	4	-9.50795	9.50795	14.9713	123.247	0.194929	14.5653	9.53378	43.8905	-4.1436	4.80469																					0.791002	11.5122
20180719 RPE1 ricm 2	6	10	2144.95	59	31.2634	-31.2634	690.081	15	15.0711	-15.0711	2.96507	253.775	-22.6223	7.99539	-23.6334	21.596	-23.0577	-4.07153																					6.24844	11.3167
20180719 RPE1 ricm 2	7	1	1812.82	26	5.61996	-5.61996	467.092	19	1.63921	-1.63921	15.8145	267.92	-2.31398	6.37636	-3.27075	16.4118	-6.7536	28.0921																					8.17255	14.8217
20180719 RPE1 ricm 2	7	2	2083.89	56	5.38635	-5.38635	1001.58	15	-4.80311	4.80311	12.4214	225.59	2.9955	16.2064	4.73446	17.0641	6.58104	15.6091																					2.91064	9.86812
20180719 RPE1 ricm 2	7	3	1173.82	17	4.68331	-4.68331	397.564	5	-4.08363	4.08363	14.566	172.754	-9.75053	28.5101	5.04924	54.774	-10.5493	20.2307																					1.64598	16.2071
20180719 RPE1 ricm 2	7	4	1384.87					7	-12.8211	12.8211	15.9877	160.794	12.5597	23.9004	30.0957	28.7985	-13.3055	25.1155																					4.7214	17.2929
20180719 RPE1 ricm 2	7	5	1164.04					16	-5.78553	5.78553	12.0899	145.609	4.70577	21.541	8.65141	29.1321	0.365487	5.02382																					0.976408	12.0632
20180719 RPE1 ricm 2	7	6	1080.07	45	8.94176	-8.94176	593.823	7	-2.36319	2.36319	13.016	159.754	-3.05238	21.8679	6.29264	49.0286	-3.89041	7.28433																					1.18147	7.93048
20180719 RPE1 ricm 2	7	9	2386.86	39	7.75152	-7.75152	627.262	11	-3.13045	3.13045	10.1014	229.646	3.46401	17.6968	-1.65469	12.2922	-12.6689	20.2245																					2.43828	13.1463
20180719 RPE1 ricm 2	7	10	960.8	57	15.1195	-15.1195	282.741	28	6.95921	-6.95921	6.62924	142.177	3.71496	1.31912	0.599459	8.9943	0.193954	-0.351378																					6.52234	17.189
20180719 RPE1 ricm 2	7	11	833.264	44	7.68349	-7.68349	498.502	6	-10.5353	10.5353	17.3871	132.4	0.572923	20.067	16.6321	29.0907	-1.12295	7.04959																					-0.06804	11.28
20180719 RPE1 ricm 3	3	1	1522.42	30	5.87512	-5.87512	609.581	8	-3.82873	3.82873	10.9383	174.314	0.649966	24.5606	3.22982	21.8896	-3.69858	24.1758																					0.307818	12.7011
20180719 RPE1 ricm 3	3	2	929.154	29	5.49508	-5.49508	497.774	8	-4.56041	4.56041	23.284	191.163	-3.47281	22.2128	1.60606	19.3064	-6.14639	21.2749																					-0.320903	13.3749
20180719 RPE1 ricm 3	3	7	3301.21	20	2.28347	-2.28347	908.599	12	-3.90489	3.90489	12.9979	323.355	-1.52864	25.2763	-1.52864	25.2763	-20.1585	79.9722																					1.8627	11.7923
20180719 RPE1 ricm 3	5	1	835.391	51	5.75523	-5.75523	485.917	2	-4.63611	4.63611	11.8128	119.399	-4.86611	25.6865	19.3648	44.8785	-5.78057	20.2522
20180719 RPE1 ricm 3	5	2	821.514	14	10.1305	-10.1305	282.793	5	-6.2219	6.2219	14.1215	126.576	-9.30223	24.0827	8.10669	26.8649	-12.8805	18.6204
20180719 RPE1 ricm 3	5	4	1055.56	19	10.4071	-10.4071	504.43	1	-2.11078	2.11078	13.2458	159.754	-2.83781	15.4859	22.2805	117.839	-6.62397	9.31487
20180719 RPE1 ricm 3	5	7	1416.14	36	10.9753	-10.9753	554.717	15	1.63849	-1.63849	20.7291	256.895	-3.22868	27.3437	-2.70453	24.2657	3.00159	12.6062
20180719 RPE1 ricm 3	5	8	1154.05	34	7.35487	-7.35487	704.382	9	-4.13494	4.13494	17.8505	191.684	-3.84676	20.3587	-0.262398	18.6288	1.05422	20.5602
			90		74	-0.109619	692.379
					82.2222		358.018

## Sheet: Y-27
	pos	cell	Vi	t of V loss	deltaV% at t of V loss		A at t of V loss	no V bump	t of 90	deltaV% at t of 90	-deltaV	deltaS% at t of 90	A at 90	dV/dt i	dA/dt i	10 min before dV/dt i	10 min before dA/dt i	10 min after dV/dt i	10 min after dA/dt i
20181024	1	2	1758.3	50									219.661	6.56533	20.061	6.56533	20.061	-0.271362	13.6942
20181024	1	5	952.501	50					9	-6.20964	6.20964	12.8655	131.152	7.53228	19.4111	7.07075	18.771	0.210389	12.2118				10 min before dV/dt i	stdev	10 min before dA/dt i	stdev	10 min after dV/dt i	stdev	10 min after dA/dt i	stdev	n	Vi	stdev
20181024	1	6	1673.86	23	7.25075	-7.25075	542.081	1	11	1.93922	-1.93922	12.2481	228.294	-2.67177	22.0839	-1.0187	22.0839	-6.52377	25.4087		Y-27	20181024	-0.313546	5.10042	24.9588	10.7704	-4.3144	3.75621	14.9469	6.88752	23	1673.86	464.194
20181024	2	2	1935.98	60	16.9838	-16.9838	975.579	1	4	3.0252	-3.0252	7.56366	212.693	-5.93065	24.1757	-13.5592	35.4023	-6.86867	11.0313		Y-27	20181031 1	0.667905	5.10497	23.6986	15.8948	-3.8022	4.02416	20.1499	11.5383	19	1290.94	280.115
20181024	2	5	2009.45	60	11.945	-11.945	1104.65		6	-1.84234	1.84234	13.311	247.535	3.5462	24.1377	7.00173	29.8414	-1.22426	9.71416		Y-27	20181031 2	2.30853	7.43117	37.5126	15.5927	-4.47331	6.63954	25.0388	16.3039	43	1321.79	405.049
20181024	3	3	1172.18	29	2.72721	-2.72721	315.971		11	-0.0315401	0.0315401	12.9839	177.539	-0.902382	21.0174	-1.72263	18.7971	-2.96964	2.53775
20181024	3	4	1709.25	60									210.717	5.79692	11.4358	0.305619	12.182	-7.59616	29.4763
20181024	5	1	2708.29	52	19.8303	-19.8303	1294.15	1	7	0.328471	-0.328471	12.3481	305.362	-7.42087	38.4352	-2.56788	44.9099	-11.1934	12.9383
20181024	5	2	1265.05						11	-1.47432	1.47432	13.7472	186.379	1.08054	19.497	1.08054	19.497	-1.92808	10.4682
20181024	5	3	1903.84	55	5.00058	-5.00058	665.952	1	24	-0.949409	0.949409	12.9555	240.254	4.18177	5.4003	-0.708129	17.3524	-2.81798	14.9469			Vi	stdev	n
20181024	6	5	1088.61	33	8.98131	-8.98131	734.804		5	1.35878	-1.35878	11.9047	167.242	-6.9363	38.1537	-7.6248	38.613	-2.8172	31.1821			1417.69	416.068	85
20181024	7	2	1255.84	18	6.42153	-6.42153	456.847		5	1.28279	-1.28279	9.44186	165.89	-6.0764	25.6229	-2.04315	26.495	-5.52379	20.1965
20181024	8	1	1292.64	56	9.9568	-9.9568	774.014		5	-0.455525	0.455525	9.24528	159.13	-9.54216	26.8977	1.1916	33.5822	-10.7763	19.0532
20181024	8	2	1791.09	58	6.64538	-6.64538	865.644		8	-2.00512	2.00512	9.67491	192.412	0.378287	23.9594	1.7097	24.4269	-1.92238	14.7792
20181024	8	3	1756.11	52	26.3621	-26.3621	1843.72	1	5	-0.927473	0.927473	11.1328	211.133	0.951588	27.0697	4.7804	37.7943	-4.3144	26.173
20181024	8	4	2063.17	49	15.5171	-15.5171	940.321	1	5	0.43648	-0.43648	7.36227	201.252	-5.52592	25.0614	-1.45216	40.2236	-10.777	18.5694
20181024	9	1	1519.03	60	23.056	-23.056	915.567	1	10	4.05506	-4.05506	6.61166	177.955	-8.58891	19.7092	-10.2244	22.1773	-5.25826	11.4626
20181024	9	2	1253.52	37	1.97346	-1.97346	429.858		20	-4.56766	4.56766	12.5291	162.77	1.85544	22.8653	2.51426	22.7142	1.85544	22.8653
20181024	9	3	1417.51	50	14.3291	-14.3291	1009.28		5	-0.94046	0.94046	9.30629	167.138	-6.49106	23.846	2.06946	29.4549	-10.72	20.2812
20181024	9	4	2382.52	59	13.1253	-13.1253	916.503	1	14	1.84017	-1.84017	8.87782	251.487	-2.36693	12.9111	-5.47572	15.695	-2.54615	21.9379
20181024	9	5	1337.34	52	13.6573	-13.6573	765.59	1	4	1.8989	-1.8989	13.4409	204.476	-9.62725	25.9919	-4.72128	39.6262	-7.42187	14.75
20181024	9	6	744.117	57	29.1014	-29.1014	937.928	1	7	1.58387	-1.58387	14.535	142.385	-2.34764	19.9019	-0.313546	24.9588	-3.03741	11.7046
20181024	10	6	2127.86	59	14.66	-14.66	1259.93	1	3	-0.336363	0.336363	11.4302	246.807	-5.90283	31.8422	3.07619	57.3075	-8.79578	22.5953
20181031 1	2	5	1740.3	49	2.43612	-2.43612	1033.3		16	-3.16041	3.16041	15.9411	240.982	-2.79054	39.0756	-2.40891	36.651	-1.16918	33.8949
20181031 1	3	3	1024.95	47	2.95373	-2.95373	721.024		16	-7.38601	7.38601	21.8538	189.291	-4.05601	27.2999	-0.92243	32.9877	-8.51767	15.2169
20181031 1	3	4	1415.42	31	4.0197	-4.0197	525.96		17	-4.44752	4.44752	11.5365	168.178	-4.31594	21.6563	-3.75965	20.2241	-9.05688	25.0537
20181031 1	6	7	1086.23						14	-1.31756	1.31756	9.22768	137.6	0.408147	15.3639	0.667905	17.0711	1.48803	13.9398
20181031 1	7	3	1117.53	41	6.98626	-6.98626	698.61		15	-6.79916	6.79916	12.2373	137.912	-0.638528	19.4201	2.06498	21.7372	-6.0668	24.0829
20181031 1	7	7	1156.22	52	4.12779	-4.12779	907.975		13	-4.07353	4.07353	17.7769	191.684	-1.52256	21.0091	1.55139	21.6159	-3.8022	13.2446
20181031 1	8	6	1279.68						39	-6.68219	6.68219	16.9301	189.395	1.38245	16.5599	1.9545	16.5599	3.0528	5.55405
20181031 1	8	8	1444.92						21	-6.36864	6.36864	11.724	161.106	7.04555	15.5581	7.04555	15.5581	5.53326	10.0318
20181031 1	9	4	1755.13	53	10.2321	-10.2321	1075.22	1	17	2.4524	-2.4524	7.67156	196.884	-2.95783	31.0807	-3.24757	24.523	-6.77668	20.1567
20181031 1	10	2	1146.33	53	6.63276	-6.63276	710.467	1	8	0.663787	-0.663787	12.2818	172.962	-0.943755	23.9555	0.801204	24.933	-1.666	15.2117
20181031 1	10	3	1413.51	41	6.14557	-6.14557	1004.7		12	-2.97559	2.97559	17.4574	221.117	-2.00371	33.0375	2.95361	32.0912	-6.43974	35.8131
20181031 1	10	8	1654.6						22	-3.1063	3.1063	9.46889	173.17	1.22099	25.611	3.40137	27.1723	-4.977	19.6311
20181031 1	10	10	1004.17	32	3.96892	-3.96892	219.869		27	0.826953	-0.826953	11.7603	155.801	-4.57259	10.0336	-7.86797	10.6067	-1.47969	18.797
20181031 1	10	12	1824.99	52	26.6481	-26.6481	1357.18	1	6	1.09851	-1.09851	7.40047	190.435	-9.22007	33.6941	-5.95797	31.2594	-6.59123	33.1521
20181031 1	11	1	1067.69	52	6.30713	-6.30713	844.739	1	8	-0.719183	0.719183	9.01766	137.184	-5.64378	27.0575	-1.85992	23.5886	-3.31463	21.1179
20181031 1	11	2	1290.94						6	-4.23048	4.23048	15.1822	187.939	0.90255	33.9482	9.66002	42.2369	-6.45006	20.1499
20181031 1	11	3	934.872	43	3.39365	-3.39365	436.098		11	-2.16666	2.16666	15.7857	161.418	-0.885386	20.8853	-0.279596	20.8939	-1.01299	3.43559
20181031 1	11	4	1708.42	32	7.79088	-7.79088	1086.66		12	-2.68039	2.68039	9.96772	185.235	-7.65201	56.6229	-2.2589	87.261	-8.42029	54.4397
20181031 1	11	6	1498.98						8	-8.9992	8.9992	13.8057	170.362	8.86393	25.8667	13.9869	23.6986	0.0273487	20.3336
20181031 2	1.1	1	1110.15	54	5.27136	-5.27136	878.801		18	-3.03129	3.03129	12.0589	153.305	-1.45053	18.8617	-0.406164	17.8458	-1.96681	16.4344
20181031 2	1.1	2	1087.05	61	0.945329	-0.945329	873.757		24	-7.66086	7.66086	18.5099	176.395	6.81402	22.1428	9.11988	24.0069	1.07539	20.6348
20181031 2	1.1	3	872.266	58	2.77286	-2.77286	653.367		11	-7.37754	7.37754	22.4544	172.858	1.72545	22.247	0.312076	25.9971	-0.265313	5.72633
20181031 2	1.1	4	1013.3	19	6.28821	-6.28821	382.535	1	6	1.22247	-1.22247	13.2253	166.618	-5.83203	28.2664	-3.17161	40.3098	-5.39023	14.6842
20181031 2	1.1	7	1342.94	52	6.5404	-6.5404	460.28		45	1.55251	-1.55251	6.39894	148.521	-6.97561	39.5503	-1.11314	34.2953	-9.1681	43.3498
20181031 2	1.2	2	1245.26	61	5.24575	-5.24575	1718.39		6	-5.69027	5.69027	14.4838	172.234	1.91944	34.2812	10.0242	52.0966	-2.04623	30.9467
20181031 2	1.2	4	1312.67	61	10.6514	-10.6514	1620.42		9	-1.33218	1.33218	18.9474	225.278	-1.20946	36.2739	2.30853	39.5344	-2.66119	33.2374
20181031 2	1.2	5	1373.78	50	3.83274	-3.83274	1328.89		9	-10.4298	10.4298	16.6462	178.995	11.9031	23.7193	17.8306	23.7328	-5.05893	32.3563
20181031 2	2	1	1321.79						8	-15.7983	15.7983	25.3891	217.789	13.9536	33.3296	26.8132	37.5126	-0.0353283	26.7771
20181031 2	2	2	946.591						18	-4.60485	4.60485	18.5847	170.466	3.46061	7.12317	1.59685	11.9221	-2.87716	8.01051
20181031 2	3	2	1558.53	60	7.38099	-7.38099	1164.45		14	-3.93685	3.93685	17.3942	231.622	6.39269	13.5015	3.68099	18.2922	-9.3611	20.6869
20181031 2	3	3	1421.1						10	-4.53131	4.53131	22.5514	249.407	1.16547	42.5039	3.36092	39.7402	-0.971686	22.7807
20181031 2	3	5	1140.35						9	-9.62181	9.62181	21.8497	196.156	4.12683	28.384	15.5046	42.4243	-2.23005	14.9516
20181031 2	4	3	1521.16	47	3.89385	-3.89385	706.774		22	-3.03638	3.03638	12.9997	197.3	2.47469	14.6504	4.27521	15.4094	-0.335449	18.0534
20181031 2	4	5	841.87	20	11.2963	-11.2963	536.984	1	4	1.21964	-1.21964	20.576	180.139	-7.48265	30.5478	-4.22877	44.078	-8.08686	25.0388
20181031 2	4	8	672.223						6	-8.13786	8.13786	29.5708	169.842	0.729869	33.6114	10.946	52.3568	-0.0608425	17.9724
20181031 2	5	1	1033.95	10	3.4188	-3.4188	277.385		5	-0.802689	0.802689	18.5343	191.476	-5.65146	29.1276	0.391891	56.6629	-3.83962	20.4659
20181031 2	5	3	1574.44	11	4.91988	-4.91988	521.071		4	-0.512644	0.512644	10.2573	190.643	-10.1732	44.6684	2.36819	29.1883	-6.97391	44.4842
20181031 2	5	7	1264.19						9	-5.27135	5.27135	16.3195	189.187	0.99936	25.8488	5.36118	30.7731	-2.01618	8.8458
20181031 2	5	8	925.463	60	3.60907	-3.60907	542.913		13	-1.03215	1.03215	12.6763	146.649	-1.21765	8.19989	-1.37458	7.80913	-2.71019	11.3352
20181031 2	6	2	1259.33	37	18.2857	-18.2857	1182.6	1	6	2.89855	-2.89855	17.5996	224.237	-3.12912	45.9943	-8.49416	63.6934	-3.82331	40.8105
20181031 2	6	3	647.507	15	2.74153	-2.74153	194.128		8	-0.825099	0.825099	11.3334	109.831	-1.8506	19.0469	1.84245	31.7741	-2.92455	13.0439
20181031 2	6	5	1645.44	61	15.8547	-15.8547	1431.13		17	-4.03676	4.03676	12.3537	196.468	0.188045	32.889	7.50422	36.7558	-8.98954	32.889
20181031 2	7	1	1190.97	39	14.5219	-14.5219	990.348		8	-4.83144	4.83144	10.4531	138.536	-2.70495	29.8855	7.76682	37.2966	-5.59831	35.5125
20181031 2	7	3	1222.79	39	3.36817	-3.36817	999.188		4	-6.56532	6.56532	11.3936	139.992	2.5536	43.3012	24.4103	55.955	-0.204243	40.4868
20181031 2	7	7	1345.82						18	-9.65056	9.65056	16.2981	177.435	-0.0697731	45.749	0.447164	32.042	-6.09934	49.8557
20181031 2	7	8	2222.92	25	1.54973	-1.54973	1052.65		10	-3.90764	3.90764	14.4706	264.488	0.454364	49.9123	3.58141	38.1272	-6.72153	59.3223
20181031 2	8	1	1691.62	38	18.6062	-18.6062	1258.58		12	-4.94782	4.94782	15.0125	219.973	-14.3259	55.5147	-4.50026	55.1441	-14.3812	59.3475
20181031 2	9	2	1847.88	61	8.34729	-8.34729	770.894		34	-3.89853	3.89853	11.4412	203.436	-4.86729	23.4877	-3.40547	21.6156	-14.0512	41.1877
20181031 2	9	3	2170.75	35	12.0311	-12.0311	1073.35		17	-0.791002	0.791002	11.5122	248.159	-9.81178	64.6428	-9.48992	78.5455	-11.9447	46.8632
20181031 2	9	4	1590.34						19	-6.24844	6.24844	11.3167	168.074	-4.70081	42.4116	7.92083	48.0299	-4.47331	34.7826
20181031 2	9	7	1892.76	33	17.9834	-17.9834	1422.23		14	-8.17255	8.17255	14.8217	216.125	-27.6442	79.2875	0.411817	65.1808	-35.5846	80.0331
20181031 2	10	1	1757.95	61	9.17707	-9.17707	1339.7		22	-2.91064	2.91064	9.86812	186.171	-3.28234	41.5458	3.05427	35.4661	-6.7345	46.3133
20181031 2	10	2	2124.44	58	23.4616	-23.4616	1974.25		6	-1.64598	1.64598	16.2071	285.497	-18.6444	61.0446	-2.31969	66.5847	-25.1019	57.9553
20181031 2	10	4	1423.77						15	-4.7214	4.7214	17.2929	214.253	3.11862	26.2602	3.02845	31.635	0.480666	14.6501
20181031 2	10	5	1669.72	61	9.07507	-9.07507	1290.2		6	-0.976408	0.976408	12.0632	212.277	-4.623	35.1513	3.97698	44.4835	-6.1806	27.2984
20181031 2	10	6	2131.77	61	9.81867	-9.81867	1462.02		18	-1.18147	1.18147	7.93048	200.212	-8.13387	35.4996	-3.6059	33.8703	-7.42326	24.3141
20181031 2	10	7	1530.75	37	3.20842	-3.20842	794.556		6	-2.43828	2.43828	13.1463	202.292	0.765988	34.346	4.44544	44.8578	-1.36629	23.2668
20181031 2	10	10	947.541						7	-6.52234	6.52234	17.189	157.049	-8.65761	23.343	-3.97246	50.339	-6.66123	8.71429
20181031 2	11	1	1372.59	53	15.873	-15.873	910.991		10	0.06804	-0.06804	11.28	184.923	-4.25038	25.0591	-2.4384	34.3161	-7.1568	17.1996
20181031 2	12	2	950.377	61	12.3645	-12.3645	681.137		6	-0.307818	0.307818	12.7011	151.849	-4.45959	27.1021	-0.865109	31.2851	-3.83921	21.9082
20181031 2	12	5	726.974	26	11.0024	-11.0024	372.654	1	4	0.320903	-0.320903	13.3749	131.88	-3.00345	20.8967	1.55954	54.3955	-2.70887	14.4677
20181031 2	12	6	877.842	19	11.6164	-11.6164	765.902		3	-1.8627	1.8627	11.7923	133.648	-8.59334	32.5131	8.17579	62.2995	-8.18808	30.4917
			85			65	907.734	19
							387.992
								22.3529

## Sheet: CK666 100uM
	pos	cell	Vi	t of V loss	deltaV% at t of V loss		A at t of V loss	t of 90	deltaV% at t of 90	-deltaV	deltaS% at t of 90	A at 90	dV/dt i	dA/dt i	10 min before dV/dt i	10 min before dA/dt i	10 min after dV/dt i	10 min after dA/dt i
20181031 1	5	1	1005.63					29	-5.13078	5.13078	13.4896	144.881	7.92673	20.9173	7.41367	24.0509	2.19068	1.00274				10 min before dV/dt i	stdev	10 min before dA/dt i	stdev	10 min after dV/dt i	stdev	10 min after dA/dt i	stdev	n	Vi	stdev
20181031 1	6	7	1874.3					35	-2.68543	2.68543	11.1575	210.093	16.6287	23.262	14.2242	24.6072	-0.868665	0.732924		CK-666	20181031 1	8.48712	7.9093	17.1128	8.67258	-0.13225	7.62589	4.69236	7.35758	21	1440.48	486.294
20181031 1	7	5	1440.48					30	-15.5227	15.5227	19.604	184.923	7.39773	1.90476	8.48712	13.3485	5.14779	1.93576		CK-666	20181031 2	7.83697	7.42982	20.5769	9.86819	-3.79215	6.56959	11.1673	8.48127	17	1233.37	281.269
20181031 1	7	9	1130.14					16	-11.4647	11.4647	15.5984	143.945	10.1955	11.6831	10.1955	11.6831	-0.13225	10.0732
20181031 1	7	10	777.394					36	-21.5795	21.5795	20.8312	107.334	4.56327	2.64665	6.02697	6.38184	-0.420599	1.77755
20181031 1	8	3	2365.8					60	-9.49814	9.49814	13.0137	215.189	31.2511	25.1867	36.1155	26.5663
20181031 1	8	7	1767.45	58	3.32846	-3.32846	338.02	25	-0.66135	0.66135	10.1679	204.164	4.339	15.8985	7.44797	15.8985	3.42309	0.7771			Vi	stdev	n
20181031 1	10	1	1140.74					7	-4.81463	4.81463	10.6902	136.768	3.56235	11.4553	8.76441	13.1233	10.0502	5.86835			1355.93	429.134	38
20181031 1	10	2	912.102					7	-8.57275	8.57275	15.3972	135.104	10.5255	18.0362	14.5914	21.2433	0.726656	4.41429
20181031 1	10	3	1104.58					9	-5.20857	5.20857	15.841	170.05	4.1965	17.4441	5.7776	16.6057	1.46334	4.51395
20181031 1	10	4	1638.22	57	4.46416	-4.46416	507.551	36	-5.00945	5.00945	13.5451	201.772	1.78656	29.6579	8.8307	26.5996	-10.1846	23.4275
20181031 1	11	1	986.251					21	-4.8272	4.8272	11.4821	130.112	3.99004	5.06635	1.51771	7.35514	4.24923	2.28818
20181031 1	11	2	1923.68					56	-10.2901	10.2901	13.992	193.972	-8.66366	28.4968	6.89937	34.1201	-17.8565	19.5708
20181031 1	11	2	1923.68					56	-10.2901	10.2901	13.992	193.972	-8.66366	28.4968	6.89937	34.1201	-17.8565	19.5708
20181031 1	11	4	1200.21	53	12.1589	-12.1589	823.938	8	-8.49903	8.49903	13.4683	146.545	7.43235	16.6011	14.357	17.1128	-13.6406	12.4317
20181031 1	11	5	1569.87					12	-8.89851	8.89851	14.1431	179.827	10.527	22.1448	17.4369	31.8914	0.874062	1.57565
20181031 1	11	6	1617.79					49	-9.41767	9.41767	13.5297	173.482	3.49518	3.87575	3.72013	9.82517	1.30312	7.93459
20181031 1	11	9	1131.2	57	2.15293	-2.15293	464.076	15	-7.68957	7.68957	13.6744	146.545	8.09271	17.033	9.87408	16.7678	-4.13458	4.69236
20181031 1	11	10	1980.04	61	7.35298	-7.35298	574.843	11	1.73784	-1.73784	7.30583	204.476	-7.34619	24.0987	-4.74633	26.534	-9.49992	20.326
20181031 1	11	11	2544.62					61	-8.55503	8.55503	12.4729	226.318	14.1336	1.6283	-1.52566	4.89782
20181031 1	11	13	980.615					16	-10.9137	10.9137	16.5612	140.408	6.42746	18.2955	10.2134	18.1583	-6.52218	6.1201
20181031 2	2	1	914.886	45	3.16124	-3.16124	458.356	8	-1.87694	1.87694	12.4006	141.032	2.09439	17.9825	3.56301	20.5769	-4.07946	13.5927
20181031 2	2	2	822.846					16	-2.47831	2.47831	17.555	155.905	4.41498	16.9163	9.80485	48.8413	4.89052	0.85
20181031 2	2	6	788.559	18	9.16212	-9.16212	273.536	4	1.18574	-1.18574	7.24128	108.167	-3.55965	16.7935	-3.9604	21.0541	-5.46312	11.3159
20181031 2	4	1	929.754					28	-6.95748	6.95748	13.0166	126.992	2.63061	2.6497	1.22748	11.8076	-0.921219	17.0951
20181031 2	4	2	1278.97					14	-16.3595	16.3595	20.1393	171.298	13.4772	17.2522	16.4867	19.017	-1.91563	2.8966
20181031 2	5	1	1555.5	40	9.16687	-9.16687	644.163	15	-7.03466	7.03466	15.394	200.94	6.61544	21.9172	17.8105	22.7118	-24.0289	24.9954
20181031 2	5	4	1147.44					16	-13.2271	13.2271	17.9416	156.217	7.75304	11.988	7.83697	12.4951	-7.32605	7.63079
20181031 2	7	1	1008.99					28	0.820447	-0.820447	7.26166	125.952	2.04036	9.92356	2.64929	9.84691	-0.592963	7.36061
20181031 2	7	2	863.604					14	-8.67016	8.67016	16.5606	137.08	9.24737	17.8564	8.40586	24.4057	-0.0486155	2.24949
20181031 2	8	1	1360.36					24	-17.0976	17.0976	19.8647	172.13	12.4095	10.9331	13.7508	13.3302	-0.592069	2.52437
20181031 2	9	1	1477.67					22	-14.5427	14.5427	16.5451	162.978	20.5282	18.6163	19.3982	22.0605	-0.0989696	11.1673
20181031 2	9	4	1267.77					22	-9.13733	9.13733	13.3647	147.481	5.18195	17.0446	4.8061	16.2808	-3.79215	8.44083
20181031 2	9	6	1591.87					14	-6.96933	6.96933	11.7137	167.762	13.1587	15.5934	13.1295	15.891	-9.64415	5.14829
20181031 2	9	6	1485.41					9	-5.36302	5.36302	15.5395	204.06	-2.20499	26.9355	6.80539	28.6225	-9.63827	23.862
20181031 2	10	2	1093.64					21	-17.6623	17.6623	18.3266	132.816	12.792	9.13479	1.51414	7.97769	-10.226	13.0535
20181031 2	10	4	1233.37					25	-8.80973	8.80973	14.3769	155.593	-10.7467	29.5848	20.0113	24.2509	-12.007	29.8429
20181031 2	10	6	1689.79					14	-0.603036	0.603036	15.2853	242.439	-7.46029	34.4313	-3.95197	36.2982	0.729977	20.4833
			38	8			510.56
				23.6842			162.417

## Sheet: PEG 20181003
pos	cell	Vi	dV/dt i		-1.17462			1155.9	298.457	47
1	1	842.815	3.30293		3.29977
1	2	989.572	-2.2224				-0.417184	3.29977
1	2	1063.17	-2.22497
1	4	1142.44	-2.56056
1	5	1103.31	-1.98459
1	6	1240.7	8.97808
1	7	1000.22	-1.17462
1	8	1299.79	2.19256
1	9	1087.46	-2.56175
1	10	879.836	6.97731
1	11	603.521	1.56933
1	12	1573.36	4.70769
3	1	1067.26	5.22935
3	2	629.698	-1.58296
3	3	1464.33	-4.09873
4	1	1557.97	4.40065
4	2	1467.93	-4.148
5	1	1166.84	-1.57904
5	2	1340.66	-2.12201
5	4	1609.03	-0.836462
5	6	943.951	-1.90403
5	9	1235.35	-2.12324
6	2	885.604	-1.73244
6	3	935.989	0.643463
6	4	1004.53	-3.34977
6	5	1391.12	-0.538566
6	6	1706.73	-3.80305
6	7	1409.51	1.63769
6	8	1681.64	0.292509
6	9	1041.17	-3.5638
6	10	850.757	0.788265
6	11	883.842	2.90013
7	1	800.526	0.740594
7	2	1054.05	2.18739
7	3	1573.35	-1.72911
7	4	1196.95	-6.16035
7	5	1133.09	5.08574
8	1	904.478	0.87173
8	2	1501.67	-4.98203
8	3	1030.88	-4.15394
8	4	827.209	-6.63567
8	5	849.408	0.23543
8	6	1028.57	-1.28814
8	7	1905.86	-2.7569
9	1	1477.59	-0.816494
9	2	872.422	0.220556
9	4	1071.37	0.0645772
