# Supplementary material for: A mechano-osmotic feedback couples cell volume to the rate of cell deformation
Source: eLife journal article supplement (doi:10.7554/elife.72381), 2022-04-13
Supplement: supp [file dVdtdAdt.xlsx]

## Sheet: 0-10
average	29.3245	-9.67865			13.8797	-5.16956			6.1095	-2.78487				29.3245	-9.67865	8.78448	8.86091		1.35548	1.36727
stdev	8.78448	8.86091			3.11278	6.54939			1.80584	6.71735				13.8797	-5.16956	3.11278	6.54939		0.474694	0.998772
fast spreading	dA/dt	dV/dt		moderate spreading	dA/dt	dV/dt		slow spreading	dA/dt	dV/dt				6.1095	-2.78487	1.80584	6.71735		0.278648	1.03651
	61.6438	-20.8802			20.0239	-5.35578			8.83455	-8.92505
	50.2814	-31.7966			19.6326	-6.10587			8.70688	11.4382
	49.7851	-11.1493			19.5496	-11.7902			8.39807	-7.06858
	43.9157	-24.2082			18.8109	0.528966			8.39235	-4.8054
	38.8855	-4.89734			18.6969	-4.60061			8.38756	-4.45614
	34.8694	-11.2304			17.3233	-0.815073			8.30579	-9.41257
	34.8686	-9.12036			17.2602	-3.18096			8.13682	-6.40884
	34.4018	-3.52614			17.1047	-8.63318			7.93576	-2.30904
	33.5763	-15.6385			17.0491	-7.52619			7.80682	5.9357
	33.4865	-12.8464			16.786	-14.5442			7.77376	-0.0925953
	33.2402	-5.21458			16.5636	-9.2083			7.77305	5.1822
	31.5368	1.75195			15.8669	-8.5912			7.6691	-6.52988
	30.8916	-3.32253			15.7936	-7.54009			7.66762	9.89167
	30.461	-8.41636			15.0799	0.104426			7.4378	-2.47914
	30.0535	-1.50708			14.9981	3.94473			7.4097	4.11729
	29.2421	-11.7844			14.6309	-3.36789			7.03134	-2.22393
	28.4075	-8.74758			14.127	-0.151027			6.94531	-4.42119
	28.3826	-15.9823			13.9074	-17.4232			6.75758	-1.23951
	28.0234	-10.0591			13.8663	-6.26434			6.5447	-23.0352
	27.1096	-16.2954			13.5675	-13.32			6.49865	-7.95459
	26.6765	-6.57287			13.5172	-12.0141			6.21355	-15.5373
	26.2199	-9.96038			13.5096	-15.4534			6.1033	-7.5413
	25.899	-10.506			13.2743	-8.04897			5.98287	-8.55959
	25.5018	-16.8356			12.8238	-3.15748			5.92747	-4.22098
	25.2562	-14.0516			12.5994	-10.165			5.91711	-0.305477
	25.2338	-15.4464			12.3672	-8.41823			5.66779	-3.12498
	25.0288	-15.2167			12.3508	-0.314965			5.42212	7.5775
	24.7784	-13.7516			12.2029	-1.1543			5.31697	-1.08594
	24.5247	-1.23661			12.0628	-19.009			5.23873	-0.843784
	24.4117	-10.2617			11.8783	7.46768			4.99666	6.8106
	23.354	-5.53556			11.8286	-1.9645			4.66988	-8.27613
	22.9668	-1.19975			11.7321	-1.40054			4.5837	-6.45555
	22.8758	1.88554			10.9303	-3.50524			4.44772	-5.73654
	22.7449	-3.20747			10.7792	-1.83497			4.04899	6.02669
	22.7061	-14.1455			10.7554	-5.7297			4.01065	-4.97451
	22.7056	16.3078			10.7145	-6.14808			3.90023	2.85822
	22.0439	-10.9187			10.4882	17.7193			3.75747	-1.93821
	21.6928	-30.689			9.98311	-7.47119			3.68727	1.48227
	21.4692	-16.1216			9.88838	0.425905			3.25143	-11.6351
	21.2942	-5.95516			9.6835	-2.32633			3.22282	0.672366
	21.1011	-2.20672			9.66243	-4.16311			3.15409	-1.9979
	20.0796	3.99286			9.27764	-6.61507			2.66515	-5.36235
					9.15602	-3.65751

## Sheet: Sheet6
slow spreading	0_10	10_20	20_30	30_40	40_50
dV/dt	-2.80206	-3.39927	-2.39066	-0.596035	0.66852
stdev	6.71735	4.20466	3.42559	2.93516	3.8085
dA/dt	6.15843	8.18561	6.78642	3.14677	1.24324
stdev	1.80584	7.93928	5.54085	5.11232	5.58262
moderate spreading	0_10	10_20	20_30	30_40	40_50
dV/dt	-5.16516	-4.9572	-0.525977	1.83237	1.96941
stdev	6.62868	3.47832	3.56606	3.57244	2.81454
dA/dt	13.3919	14.8791	5.23189	2.97532	1.31989
stdev	2.99149	7.84871	6.49878	4.76569	5.79753
fast spreading	0_10	10_20	20_30	30_40	40_50
dV/dt	-10.1604	-5.42291	0.737697	1.589	0.858835
stdev	8.86091	5.601	5.00085	3.70796	3.42235
dA/dt	26.4482	14.1538	6.21926	3.99126	1.22405
stdev	8.78448	8.21637	6.34274	5.34027	5.58408
