# Supplementary material for: A mechano-osmotic feedback couples cell volume to the rate of cell deformation
Source: eLife journal article supplement (doi:10.7554/elife.72381), 2022-04-13
Supplement: supp [file EIPA_dVdt_dAdt.xlsx]

## Sheet: Sheet1
exp	pos	cell	Vi	t of V loss	deltaV% at t of V loss	A at t of V loss	t of 90	deltaV% at t of 90	deltaS% at t of 90	A at 90	dV/dt i	dA/dt i
20180516	1	1	2202.88				28	-4.28973	15.9402	275.721	6.94395	4.4098
20180516	1	3	2102.84	17	7.7271	352.477	3	1.98177	6.85918	209.261	-15.2842	29.4937
20180516	1	4	1401.16	25	4.95404	288.617	11	2.69009	12.5706	208.013	-2.89045	14.2192
20180516	1	5	2369.05	35	3.46105	545.409	8	-0.941841	14.9564	298.602	1.3172	32.4721
20180516	1	7	1761.72	30	2.40577	154.345	38	1.92517	6.20441	178.371	-0.246678	9.6199
20180516	1	8	2046.3	38	4.21695	58.868					-5.67209	3.3455
20180516	2	1	1457.42	29	11.4509	256.271	10	4.55771	7.87416	186.275	-6.15818	10.8008
20180516	2	4	2103.51	10	3.90115	374.11	5	2.56903	11.955	266.464	-10.0352	36.0772
20180516	2	7	1389.03	10	1.25513	291.842	6	-1.15382	15.4935	212.069	-1.30811	27.2163
20180516	2	8	2168.63				20	-1.52028	11.4848	243.063	3.8182	6.94276
20180516	2	10	1577.76	29	7.1748	318.883	14	2.1328	12.709	223.821	-0.12614	6.2902
20180516	2	11	1593.62	29	2.26243	341.036	3	0.715499	12.4149	216.749	-4.63098	30.0283
20180516	2	12	1143.18	12	2.36377	88.717	22	1.49379	16.4139	199.9	-1.54016	6.03051
20180516	2	13	2204.11	42	4.71803	301.098	37	4.14008	5.3723	213.837	-8.28	8.6447
20180516	3	1	1728.96	30	6.63136	396.16	6	5.77661	7.8813	215.189	-12.1515	25.22
20180516	3	2	1668.97	20	5.24207	333.652	11	4.29254	14.0016	215.189	-6.49912	15.956
20180516	3	4	1141.36	7	3.51673	18.513	58	-19.5309	34.2731	237.03	-1.85388	10.5045
20180516	3	5	2994.8	49	1.15762	18.513	13	-1.99602	14.3064	334.276	6.44191	22.0098
20180516	3	14	2103.45				11	-2.89298	16.5894	280.817	6.78035	15.9239
20180516	4	1	1838.29	20	7.0102	291.842	20	7.0102	15.9067	291.842	-8.36444	11.6723
20180516	4	2	1764.01	29	2.76769	493.614	7	-2.57866	20.726	282.377	4.33277	29.8394
20180516	4	3	1699.19	14	8.09634	518.159	8	5.18446	22.0039	308.899	-12.5305	35.7837
20180516	4	4	1961.7	49	2.17944	361.734	19	0.298041	7.85744	199.484	0.479817	11.7535
20180516	4	5	1940.86	19	14.2456	343.117	5	6.79274	9.49461	252.111	-25.6838	38.5585
20180516	4	6	1316.19				22	-0.308406	14.2718	199.588	-0.0702072	7.02139
20180516	6	1	1513.61	19	5.12739	326.06	7	1.58976	9.5953	190.747	-4.10742	18.7826
20180516	6	2	1586.53	19	6.41769	390.023	13	3.22058	21.1438	284.457	-5.26706	9.19321
20180516	6	4	1432.61	19	2.51228	424.866	8	-0.0119206	19.9517	249.303	-1.67151	25.3171
20180516	6	6	2096.54	9	0.709956	174.626					-1.24502	16.8603
20180516	6	9	1325.98	24	6.77295	282.949	10	3.6705	14.209	214.461	-4.10832	14.9595
20180516	6	10	1260				37	-3.88016	20.6506	221.221	1.17072	4.53467
20180516	6	12	2576.53	19	4.16887	344.781	19	4.16887	15.0885	344.781	-11.2087	6.54481
20180516	6	13	1203.54	54	5.13046	499.126	12	0.72138	21.0341	229.646	-0.109908	4.78846
20180516	6	14	1914.38	29	8.53121	465.844	4	2.70914	15.7774	282.065	-12.2458	28.898
20180516	7	1	1215.37	5	6.60155	199.172	1	0.133912	14.3058	186.275	-1.21696	13.2986
20180516	7	2	1987.41	19	9.79043	447.851	4	3.19735	12.8432	267.4	-16.5642	33.3807
20180516	7	4	1397.16	21	11.2074	406.56	4	3.88435	17.8725	244.935	-12.4743	33.7094
20180516	7	5	1332.12	11	2.40261	92.67	27	0.869233	18.6312	232.558	-1.96557	9.39373
20180516	7	6	1062.55	60	4.98717	304.946	4	-1.40561	14.4386	170.362	0.463839	16.4607
20180516	7	7	2164.74	8	6.1395	348.317	2	2.06058	11.9773	269.064	-13.8409	19.2498
20180516	7	8	1915.44	30	1.57105	476.349	8	0.946099	16.6789	281.753	-0.989891	24.703
20180516	7	9	1818.2	19	8.38544	595.332	4	2.26614	17.8001	285.497	-12.0844	45.165
20180516	7	10	1030.94				10	-8.40771	20.8872	181.699	9.05851	11.5556
20180516	7	11	1738.45	29	3.4438	449.515	8	1.99339	16.1911	264.696	-3.43828	21.7926
20180516	7	12	1744.19	15	5.50323	380.455	9	4.14564	19.1544	293.298	-8.96633	23.1112
20180516	7	13	1705.87	29	9.42836	407.705	7	2.9797	14.0509	249.719	-7.81809	22.7905
20180516	7	14	1386.46	13	5.46273	218.829	13	5.46273	12.8897	218.829	-6.49105	8.65876
20180516	7	15	1525.02	39	2.86721	357.573	13	-0.308588	16.8978	238.902	0.0876132	5.39142
20180516	7	16	1410.47	19	5.5248	310.979	10	3.46383	17.8799	245.247	-5.11412	18.8774
20180516	7	18	1619.05	29	10.2215	406.248	6	1.70568	15.1767	244.207	-5.01185	23.3967
20180516	8	1	1731.03	39	6.18639	385.551	7	0.727453	13.7068	239.734	-3.64603	27.2974
20180516	8	2	1987.35	14	9.32461	356.741	4	3.68653	11.4266	257.519	-18.7887	31.3453
20180516	8	3	1894.23	14	9.68342	510.463	4	4.0732	18.43	304.634	-17.7916	49.9093
20180516	8	4	3085.09	19	7.3316	644.943	3	0.844152	14.0734	357.469	-17.4506	41.7271
20180516	8	5	2124.96				15	-0.0331852	12.581	260.016	-0.450256	8.61051
20180516	8	6	1831.88	21	4.91887	121.167	36	2.80101	13.2585	254.815	-6.5021	3.75437
20180516	8	7	1750.8	14	6.89532	391.48	4	2.56407	16.1411	267.816	-11.3777	28.5252
20180516	8	8	1382.79	11	8.11145	354.765	3	2.22028	16.3406	228.918	-11.6141	27.2468
20180516	8	9	1948.65	25	3.21628	511.503	9	-0.163282	17.5531	287.161	-0.536564	25.3508
20180516	8	10	1222.44	29	3.04751	228.502	30	2.56325	19.4054	228.502	-1.87678	5.68675
20180516	8	11	1740.64	6	1.47259	39.418	39	-3.0387	17.3924	253.255	-1.96908	6.42112
20180516	8	12	1752.15	22	6.82538	117.215	39	4.94823	14.3384	264.28	-10.455	4.2348
20180516	8	14	1699.19	14	5.55659	359.446	5	3.08451	13.8427	247.951	-9.65431	31.8849
20180516	9	1	2289.79	29	16.0671	421.121	5	6.61572	12.7473	310.043	-23.7299	34.2912
20180516	9	3	1541.04	39	5.10042	295.482	28	4.04014	15.0435	243.999	-5.57453	4.59077
20180516	9	4	1530.62	15	7.16393	424.762	6	2.18212	20.3222	269.792	-8.19969	31.504
20180516	9	5	1954.89	49	9.82476	431.106	12	4.74473	13.3957	276.033	-8.48734	17.2055
20180516	9	6	2131.96	29	3.73168	535.84	6	-0.747145	16.8127	295.898	-0.12758	37.0258
20180516	9	8	841.133				7	-0.60784	20.2461	174.731	-0.513149	17.8377
20180516	9	9	1783.05	29	7.62002	326.06	13	4.44261	12.2831	249.823	-7.36495	8.94571
20180516	9	10	1869.18				10	1.35565	17.6576	286.225	-1.20027	20.9301
20180516	10	2	1358.45				15	-0.541497	15.8406	213.525	1.46366	14.3795
20180516	10	3	2277.51	14	9.58471	619.669	3	1.24389	15.5483	307.65	-21.5578	44.4502
20180516	10	4	1608.98	14	8.55956	422.889	5	3.20483	13.9235	240.15	-11.2066	28.4673
20180516	10	5	1989.74	14	3.13071	464.7	5	0.0130658	17.9874	295.378	-5.54886	38.1412
20180516	10	6	1186.18	10	7.16661	312.643	2	5.98791	18.0711	214.565	-8.79795	26.3266
20180308 30min	2	1	1655.6	8	3.29818	168.906	11	2.77552	13.2009	237.654	-4.78447	14.9363
20180308 30min	2	2	1834.38				6	-0.220192	13.9107	246.391	1.1308	34.3778
20180308 30min	2	4	2160.8				11	0.320524	10.6502	245.143	-1.6221	16.1162
20180308 30min	2	6	2145.31	31	5.29377	667.2	6	2.43936	7.74243	225.798	-3.90681	32.9425
20180308 30min	3	2	2991.07	3	2.6505	13.209	13	2.34618	10.3467	315.867	-2.70765	23.7654
20180308 30min	4	7	1555.89	24	3.00047	379.519	9	0.28132	8.06097	172.858	-1.70444	15.4581
20180308 30min	8	1	1838.3	9	4.688	98.078	20	-0.675392	7.89204	184.611	-6.88045	7.34774
20180308 30min	8	2	2603.57	31	5.362	482.381	10	2.27531	13.8185	324.812	-5.17939	18.1648
20180308 30min	8	8	1413.34	10	2.18523	259.288	7	0.904444	13.1577	206.244	-2.82692	29.8073
20180308 30min	8	9	1765.32	9	2.47091	102.966	18	2.0979	7.13489	189.915	-4.03637	9.33691
20180308 30min	8	10	1752.8	31	6.01364	344.989	7	-0.795216	8.54654	185.339	-2.16503	15.4666
20180308 30min	8	11	1853.07	31	3.15379	396.16	4	-1.05021	9.52255	201.46	1.05798	24.9636
20180308 30min	8	12	1195.68				4	-2.57324	17.5883	199.9	1.26832	28.5876
20180308 30min	9	1	1514.92				7	0.199699	16.0309	233.806	-1.498	30.6032
20180308 30min	9	3	2441.83				6	-0.750849	15.7532	285.705	0.574445	48.1029
20180308 30min	9	5	1495.22	18	14.0911	374.006	5	3.12834	9.62988	196.884	-15.6714	28.8299
20180308 30min	9	6	1323.54				4	-2.2501	15.697	202.604	-1.79243	33.3364
20180308 30min	9	8	1208.96	14	18.3795	334.484	5	11.2556	10.157	202.292	-17.9987	29.0517
20180308 30min	10	3	1184.25								1.47198	-0.33913
20180308 30min	10	6	1822.09	6	2.6881	103.382	14	1.04474	6.97081	185.027	-2.7599	11.6692
20180308 30min	10	9	1432.95	14	4.60265	342.181	3	0.488661	13.317	207.596	-5.44397	27.4744
20180308 30min	10	12	2864.1	31	6.26858	436.722	5	0.9487	9.42505	284.561	-7.55884	33.4813
20180308 30min	10	14	1194.27				8	-1.79546	17.1012	199.38	3.61414	20.9146
20180308 30min	11	1	1472.36	12	4.41837	373.382	4	0.0202409	22.1268	266.984	-3.339	29.5304
20180308 30min	11	6	1590.17	14	3.01299	339.684	5	1.2413	10.8265	205.932	-4.18894	26.7995
20200526	2	6	2579.4				13	-6.26766	14.9619	281.649	17.608	10.1837
20200526	2	9	2086.87	21	7.99086	142.801	30	6.22935	11.0442	275.409	-11.1989	4.57691
20200526	2	10	3196.7				24	-9.09279	19.886	369.43	0.508493	6.814
20200526	4	3	2096.81				9	-2.45669	9.09214	203.02	4.09513	18.8705
20200526	4	5	2948.31	3	2.2393	205.724	5	1.74029	8.40905	282.585	7.41601	24.218
20200526	4	6	1239.38				5	-0.472676	12.4261	178.683	1.68954	11.4839
20200526	4	8	3451.54				8	-0.48498	7.69201	279.465	4.01729	12.6504
20200526	5	1	2522.69				13	-5.71383	13.8485	267.712	11.5557	13.796
20200526	5	2	1770.9				5	-1.0323	15.0361	246.183	4.33657	18.3015
20200526	5	7	1717.98				8	0.513383	11.5485	219.453	-0.620973	19.7933
20200526	5	8	2178.24				12	-3.59465	14.7575	265.736	9.05202	10.1001
20200526	5	9	2748.13				30	-13.518	26.1463	375.983	14.6732	5.29071
20200526	5	10	2426.11				10	-2.68177	17.299	317.011	4.70344	30.9576
20200526	5	12	3672.18				11	-5.15495	11.4575	308.587	21.1274	25.8677
20200526	5	13	1647.34	7	7.67606	66.772	29	-18.3336	26.9994	254.191	-10.9089	3.28966
20200526	5	14	2645.13	19	5.3101	273.952	18	4.11423	7.87272	273.952	-8.30523	13.6735
