# Supplementary material for: A mechano-osmotic feedback couples cell volume to the rate of cell deformation
Source: eLife journal article supplement (doi:10.7554/elife.72381), 2022-04-13
Supplement: supp [file EIPA_Y27_dVdt_dAdt.xlsx]

## Sheet: Sheet1
exp	pos	cell	Vi		t of V loss	deltaV% at t of V loss		A at t of V loss	t of 90	deltaV% at t of 90	deltaS% at t of 90	A at 90	dV/dt i	dA/dt i
20180605	1	1	1717.52		3	1.71533	-1.71533	108.687	11	-3.1626	17.4021	250.551	5.55362	11.8776
20180605	1	2	2073.81		61	10.813	-10.813	1747.83	5	-2.95469	16.9063	280.713	1.10285	51.5404
20180605	2	2	1914.03		61	5.28095	-5.28095	1056.81	9	-1.81486	17.9433	279.777	4.65232	27.1872
20180605	3	3	1567.71		60	22.296	-22.296	1033.82	4	-1.72119	19.2142	253.983	-9.28788	44.7568
20180605	3	4	1379.38		60	26.3602	-26.3602	1213.03	4	-3.04102	19.1064	228.086	5.69952	29.9629
20180605	4	1	2549.06		60	4.58661	-4.58661	1158.63	10	-5.35201	17.8268	317.843	12.7786	28.3047
20180605	4	2	2310.58		14	8.46785	-8.46785	661.168	6	5.27233	14.5918	321.483	-27.3784	61.6962
20180605	4	3	1381.5		60	8.38128	-8.38128	861.484	14	-5.55677	21.8969	237.446	6.69861	3.64451
20180605	6	2	1680.5		60	9.73717	-9.73717	932.312	8	-6.85308	17.5174	231.31	13.0996	16.9996
20180605	7	5	2183.59		60	10.1806	-10.1806	1445.79	7	-4.3005	21.2342	322.211	7.74786	37.2149
20180605	9	3	1217.04		60	9.59444	-9.59444	1021.03	7	-0.687934	19.3366	218.309	-0.594075	26.2056
20180605	43110	1	2928.95		60	18.0363	-18.0363	2262.14	5	2.76416	13.5838	351.749	-14.5972	30.8048
20180605	43141	2	1181.24	1					16	-16.1655	35.4412	257.103	14.1799	4.9475
20180605	43141	4	1727.28		60	26.4316	-26.4316	1613.66	4	-0.151171	20.2333	250.551	-16.3852	58.411
20180605	11	3	1649.29		60	7.06268	-7.06268	975.995	7	-1.43987	17.0146	248.055	3.74048	24.7413
20180605	12	2	1727.76		60	7.09914	-7.09914	1184.94	7	-5.04781	19.3106	258.352	12.1054	22.7947
20180605	12	3	1262.54		29	12.0824	-12.0824	755.605	5	-0.143923	16.5292	208.949	-13.1594	43.6647
20180808 HeLa EIPA 50uM Y27 100uM RICM 1	1	1	2574.23		40	5.44041	-5.44041	943.129	7	-4.78992	14.4735	285.705	8.1239	37.7749
20180808 HeLa EIPA 50uM Y27 100uM RICM 1	2	1	1949.67	1					7	-0.00222425	14.378	261.784	1.49185	32.2144
20180808 HeLa EIPA 50uM Y27 100uM RICM 1	2	2	2158.39		33	5.0263	-5.0263	658.776	9	-1.26217	12.1406	250.967	2.39031	26.3995
20180808 HeLa EIPA 50uM Y27 100uM RICM 1	3	1	2175.62		20	5.18274	-5.18274	772.558	5	-0.253235	8.97737	223.405	1.40447	37.7269
20180808 HeLa EIPA 50uM Y27 100uM RICM 1	4	1	2031.59	1					7	-2.01813	10.4335	217.997	7.74483	37.4692
20180808 HeLa EIPA 50uM Y27 100uM RICM 1	4	2	1962.92	1					3	0.115042	9.37451	215.397	5.5848	32.8292
20180808 HeLa EIPA 50uM Y27 100uM RICM 1	4	3	2266.12		29	11.1304	-11.1304	416.545	9	8.46152	4.3284	236.718	-21.2889	23.4116
20180808 HeLa EIPA 50uM Y27 100uM RICM 1	6	1	2229.35	1					9	-2.29616	12.168	250.135	5.46242	20.0003
20180808 HeLa EIPA 50uM Y27 100uM RICM 1	6	5	3173.45		6	2.21822	-2.21822	102.654	10	2.16633	10.3072	326.684	-6.08134	29.3211
20180808 HeLa EIPA 50uM Y27 100uM RICM 1	6	6	2084.16		15	14.4463	-14.4463	305.986	5	8.59704	5.95721	241.19	-26.1448	37.842
20180808 HeLa EIPA 50uM Y27 100uM RICM 1	6	7	2440.73	1					5	-1.23755	10.975	258.872	15.8766	34.2186
20180808 HeLa EIPA 50uM Y27 100uM RICM 1	6	8	1893.2	1					4	-1.42576	9.93899	206.452	7.60848	30.2132
20180808 HeLa EIPA 50uM Y27 100uM RICM 1	7	5	2853.85		7	2.61581	-2.61581	274.889	7	2.61581	7.76537	274.889	-5.82313	34.7839
20180808 HeLa EIPA 50uM Y27 100uM RICM 1	7	7	1502.67	1					4	-3.86995	13.3061	194.18	7.10025	34.2756
20180808 HeLa EIPA 50uM Y27 100uM RICM 1	9	1	3157.08	1					5	-6.68766	12.3265	278.217	33.3966	32.4603
20180808 HeLa EIPA 50uM Y27 100uM RICM 1	9	7	3041.7	1					10	-5.55409	13.3229	297.042	15.9013	22.0015
20180808 HeLa EIPA 50uM Y27 100uM RICM 1	9	8	2481.59	1					7	-3.08206	14.6721	292.154	13.5934	42.4088
20180808 HeLa EIPA 50uM Y27 100uM RICM 1	11	1	1637.31	1					3	-0.336936	11.7937	210.405	6.17762	30.8012
20180808 HeLa EIPA 50uM Y27 100uM RICM 2	1	2	1968.82		31	4.42536	-4.42536	476.349	10	1.03476	10.797	235.99	-2.83346	34.5556
20180808 HeLa EIPA 50uM Y27 100uM RICM 2	1	4	2212.48		19	17.5158	-17.5158	608.229	3	5.93492	9.01286	265.84	-31.5949	42.4299
20180808 HeLa EIPA 50uM Y27 100uM RICM 2	1	5	1240.57	1					6	-4.66935	21.9354	223.925	4.34068	31.3593
20180808 HeLa EIPA 50uM Y27 100uM RICM 2	1	6	1649.15	1					6	-2.45013	15.0577	228.606	6.2863	40.7948
20180808 HeLa EIPA 50uM Y27 100uM RICM 2	4	1	3169.27	1					23	-15.4529	22.1805	351.021	35.9896	13.0313
20180808 HeLa EIPA 50uM Y27 100uM RICM 2	6	1	1898.19		18	5.05215	-5.05215	523.567	4	0.341341	14.9605	263.656	-6.61875	49.1735
20180808 HeLa EIPA 50uM Y27 100uM RICM 2	6	3	1420.57		12	2.84912	-2.84912	480.301	4	-0.681265	14.494	210.093	-4.65297	36.9712
20180808 HeLa EIPA 50uM Y27 100uM RICM 2	6	4	2196.17		47	11.373	-11.373	642.447	14	2.86032	7.35326	227.774	-5.88333	40.3855
20180808 HeLa EIPA 50uM Y27 100uM RICM 2	7	1	1442.29	1					3	-1.74111	16.494	222.157	6.53121	35.2348
20180808 HeLa EIPA 50uM Y27 100uM RICM 2	7	4	1443.01	1					1	-0.502868	15.814	222.261	2.06371	38.0586
20180808 HeLa EIPA 50uM Y27 100uM RICM 2	7	5	1896.57		27	7.00858	-7.00858	778.383	2	-0.422015	11.6119	229.854	-8.65111	36.3904
20180808 HeLa EIPA 50uM Y27 100uM RICM 2	7	10	2538.22		28	7.55836	-7.55836	1032.78	4	-4.50443	13.932	278.529	6.54738	65.4732
20180808 HeLa EIPA 50uM Y27 100uM RICM 2	8	1	1204.39	1					5	-2.18329	17.0937	199.172	0.58341	44.7502
20180808 HeLa EIPA 50uM Y27 100uM RICM 2	9	1	2218.07		19	2.20701	-2.20701	622.269	3	-1.52415	10.8063	239.006	-2.34455	41.5022
20180808 HeLa EIPA 50uM Y27 100uM RICM 2	10	1	2807.61	1					10	-6.92648	14.1686	282.169	21.4917	16.7412
