# Supplementary material for: A mechano-osmotic feedback couples cell volume to the rate of cell deformation
Source: eLife journal article supplement (doi:10.7554/elife.72381), 2022-04-13
Supplement: supp [file example.xlsx]

## Sheet: Sheet1
t (min)	V (µm3)	PI intensity inside the cell (a.u)	background intensity (a.u)	inside-background (a.u.)
0	2227.49	121.175	113.764	7.411
0.5	2227.93	121.265	113.555	7.71
1	2231.23	121.402	113.891	7.511
1.5	2234.14	121.553	115.055	6.498
2	7569.84	121.379	111.564	9.815
2.5	8920.6	120.384	111.727	8.657
3	9867.87	119.52	111.345	8.175
3.5	10458.3	118.655	112.191	6.464
4	10269.5	128.393	111.491	16.902
4.5	7022.53	145.978	111.855	34.123
5	6088.23	154.032	112.364	41.668
5.5	5593.43	159.755	112.091	47.664
6	5305.59	163.638	112.682	50.956
6.5	5261.82	166.456	112.045	54.411
7	5197.03	169.514	112.218	57.296
7.5	5102.43	172.05	111.755	60.295
