# Supplementary material for: A mechano-osmotic feedback couples cell volume to the rate of cell deformation
Source: eLife journal article supplement (doi:10.7554/elife.72381), 2022-04-13
Supplement: supp [file example.xlsx]

## Sheet: Sheet1
0	14	1		100		p1_w11 GFP_pos8-14.tif:1	54.763	73.581	17.6611	23.7299
1	14	2	502.638	95.5993		p1_w11 GFP_pos8-14.tif:2	55.164	75.177	17.7904	24.2446
2	14	3	519.753	98.8545		p1_w11 GFP_pos8-14.tif:3	54.971	74.967	17.7281	24.1769
3	14	4	517.647	98.454		p1_w11 GFP_pos8-14.tif:4	54.88	74.271	17.6988	23.9524
4	14	5	532.489	101.277		p1_w11 GFP_pos8-14.tif:5	54.451	74.346	17.5604	23.9766
5	14	6	516.42	98.2205		p1_w11 GFP_pos8-14.tif:6	53.818	75.372	17.3563	24.3075		0.130614	0.220971
6	14	7	502.955	95.6595		p1_w11 GFP_pos8-14.tif:7	53.549	75.873	17.2696	24.469
7	14	8	525.2	99.8905		p1_w11 GFP_pos8-14.tif:8	54.634	76.246	17.6195	24.5893
8	14	9	508.742	96.7602		p1_w11 GFP_pos8-14.tif:9	54.141	76.947	17.4605	24.8154
9	14	10	523.921	99.6472		p1_w11 GFP_pos8-14.tif:10	52.717	77.091	17.0012	24.8618
10	14	11	526.256	100.091		p1_w11 GFP_pos8-14.tif:11	53.183	77.038	17.1515	24.8448		0.114998	0.519634
11	14	12	526.765	100.188		p1_w11 GFP_pos8-14.tif:12	53.963	76.504	17.4031	24.6725
12	14	13	515.916	98.1246		p1_w11 GFP_pos8-14.tif:13	54.058	75.467	17.4337	24.3381
13	14	14	517.673	98.4589		p1_w11 GFP_pos8-14.tif:14	55.271	75.126	17.8249	24.2281
14	14	15	519.642	98.8334		p1_w11 GFP_pos8-14.tif:15	55.464	74.677	17.8871	24.0833
15	14	16	525.227	99.8956		p1_w11 GFP_pos8-14.tif:16	55.539	75.533	17.9113	24.3594		0.180321	-0.134532
16	14	17	525.739	99.993		p1_w11 GFP_pos8-14.tif:17	55.209	76.144	17.8049	24.5564
17	14	18	510.778	97.1475		p1_w11 GFP_pos8-14.tif:18	55.295	77.073	17.8326	24.856
18	14	19	531.336	101.057		p1_w11 GFP_pos8-14.tif:19	54.424	76.629	17.5517	24.7129
19	14	20	534.472	101.654		p1_w11 GFP_pos8-14.tif:20	55.6	75.788	17.931	24.4416
20	14	21	550.218	104.649		p1_w11 GFP_pos8-14.tif:21	56.255	76.928	18.1422	24.8093		0.101137	0.933094
21	14	22	552.664	105.114		p1_w11 GFP_pos8-14.tif:22	56.167	77.516	18.1139	24.9989
22	14	23	535.247	101.801		p1_w11 GFP_pos8-14.tif:23	55.54	78.765	17.9117	25.4017
23	14	24	547.485	104.129		p1_w11 GFP_pos8-14.tif:24	55.708	77.629	17.9658	25.0354
24	14	25	533.384	101.447		p1_w11 GFP_pos8-14.tif:25	56.389	76.106	18.1855	24.5442
25	14	26	527.279	100.286		p1_w11 GFP_pos8-14.tif:26	57.039	76.616	18.3951	24.7087		0.0544252	-0.87109
26	14	27	540.443	102.79		p1_w11 GFP_pos8-14.tif:27	56.34	76.815	18.1697	24.7728
27	14	28	542.177	103.119		p1_w11 GFP_pos8-14.tif:28	56.439	77.851	18.2016	25.1069
28	14	29	540.506	102.802		p1_w11 GFP_pos8-14.tif:29	55.758	78.427	17.982	25.2927
29	14	30	545.314	103.716		p1_w11 GFP_pos8-14.tif:30	55.96	78.529	18.0471	25.3256
30	14	31	535.121	101.777		p1_w11 GFP_pos8-14.tif:31	55.925	79.491	18.0358	25.6358		0.198872	0.283431
31	14	32	534.188	101.6		p1_w11 GFP_pos8-14.tif:32	55.377	80.625	17.8591	26.0016
32	14	33	532.44	101.267		p1_w11 GFP_pos8-14.tif:33	55.251	80.942	17.8184	26.1038
33	14	34	518.684	98.6511		p1_w11 GFP_pos8-14.tif:34	56.309	80.101	18.1597	25.8326
34	14	35	518.11	98.5419		p1_w11 GFP_pos8-14.tif:35	57.054	81.953	18.3999	26.4298
35	14	36	524.041	99.6701		p1_w11 GFP_pos8-14.tif:36	57.148	80.191	18.4302	25.8616		0.0908908	-0.637918
36	14	37	523.508	99.5686		p1_w11 GFP_pos8-14.tif:37	59.726	81.752	19.2616	26.365
37	14	38	510.67	97.1269		p1_w11 GFP_pos8-14.tif:38	58.848	80.846	18.9785	26.0728
38	14	39	503.539	95.7706		p1_w11 GFP_pos8-14.tif:39	60.211	81.384	19.418	26.2463
39	14	40	525.547	99.9564		p1_w11 GFP_pos8-14.tif:40	58.943	78.836	19.0091	25.4246
40	14	41	529.305	100.671		p1_w11 GFP_pos8-14.tif:41	53.557	78.248	17.2721	25.235		0.263351	0.137501
41	14	42	541.476	102.986		p1_w11 GFP_pos8-14.tif:42	50.702	76.035	16.3514	24.5213
42	14	43	537.177	102.168		p1_w11 GFP_pos8-14.tif:43	51.756	76.851	16.6913	24.7844
43	14	44	522.194	99.3186		p1_w11 GFP_pos8-14.tif:44	49.175	78.486	15.8589	25.3117
44	14	45	529.946	100.793		p1_w11 GFP_pos8-14.tif:45	50.152	81.57	16.174	26.3063
45	14	46	530.652	100.927		p1_w11 GFP_pos8-14.tif:46	51.527	84.621	16.6175	27.2903		0.431408	-0.232792
46	14	47	524.385	99.7355		p1_w11 GFP_pos8-14.tif:47	53.704	85.241	17.3195	27.4902
47	14	48	516.771	98.2874		p1_w11 GFP_pos8-14.tif:48	56.407	85.86	18.1913	27.6898
48	14	49	543.075	103.29		p1_w11 GFP_pos8-14.tif:49	59.418	86.52	19.1623	27.9027
49	14	50	545.259	103.706		p1_w11 GFP_pos8-14.tif:50	62.204	89.183	20.0608	28.7615
50	14	51	531.733	101.133		p1_w11 GFP_pos8-14.tif:51	62.429	91.777	20.1334	29.5981		0.84113	0.512605
51	14	52	508.121	96.6422		p1_w11 GFP_pos8-14.tif:52	62.105	93.987	20.0289	30.3108
52	14	53	491.704	93.5197		p1_w11 GFP_pos8-14.tif:53	63.187	96.045	20.3778	30.9745
53	14	54	472.947	89.9522		p1_w11 GFP_pos8-14.tif:54	64.724	98.868	20.8735	31.8849
54	14	55	455.574	86.6478		p1_w11 GFP_pos8-14.tif:55	63.562	99.243	20.4987	32.0059
55	14	56	494.387	94.0299		p1_w11 GFP_pos8-14.tif:56	64.63	102.495	20.8432	33.0546		0.705737	-1.97332
56	14	57	473.847	90.1235		p1_w11 GFP_pos8-14.tif:57	66.789	104.386	21.5395	33.6645
57	14	58	469.376	89.2731		p1_w11 GFP_pos8-14.tif:58	66.783	103.458	21.5375	33.3652
58	14	59	459.688	87.4305		p1_w11 GFP_pos8-14.tif:59	65.417	103.566	21.097	33.4
59	14	60	447.66	85.1427		p1_w11 GFP_pos8-14.tif:60	60.98	104.5	19.666	33.7013
60	14	61	461.129	87.7044		p1_w11 GFP_pos8-14.tif:61	57.868	105.478	18.6624	34.0167		0.476702	-1.38322
61	14	62	469.334	89.265		p1_w11 GFP_pos8-14.tif:62	56.765	102.921	18.3067	33.192
62	14	63	527.16	100.263		p1_w11 GFP_pos8-14.tif:63	57.755	95.047	18.626	30.6527
63	14	64	537.962	102.318		p1_w11 GFP_pos8-14.tif:64	59.437	89.471	19.1684	28.8544
64	14	65	515.204	97.9893		p1_w11 GFP_pos8-14.tif:65	59.759	90.61	19.2723	29.2217
65	14	66	498.279	94.7702		p1_w11 GFP_pos8-14.tif:66	64.377	93.774	20.7616	30.2421		0.863796	1.81589
66	14	67	482.418	91.7536		p1_w11 GFP_pos8-14.tif:67	67.588	97.171	21.7971	31.3376
67	14	68	469.415	89.2804		p1_w11 GFP_pos8-14.tif:68	72.598	98.501	23.4129	31.7666
68	14	69	448.301	85.2646		p1_w11 GFP_pos8-14.tif:69	80.284	99.919	25.8916	32.2239
69	14	70	459.574	87.4087		p1_w11 GFP_pos8-14.tif:70	82.831	97.163	26.713	31.3351
70	14	71	488.373	92.8861		p1_w11 GFP_pos8-14.tif:71	84.916	92.657	27.3854	29.8819		1.32672	-0.756314
71	14	72	476.228	90.5763		p1_w11 GFP_pos8-14.tif:72	86.986	94.56	28.053	30.4956
72	14	73	481.141	91.5107		p1_w11 GFP_pos8-14.tif:73	88.771	94.726	28.6286	30.5491
73	14	74	495.829	94.3042		p1_w11 GFP_pos8-14.tif:74	87.253	93.04	28.1391	30.0054
74	14	75	491.153	93.4148		p1_w11 GFP_pos8-14.tif:75	87.045	84.196	28.072	27.1532
75	14	76	534.924	101.74		p1_w11 GFP_pos8-14.tif:76	87.829	77.844	28.3249	25.1047		0.973738	1.58794
76	14	77	552.597	105.101		p1_w11 GFP_pos8-14.tif:77	91.869	70.675	29.6278	22.7927
77	14	78	562.307	106.948		p1_w11 GFP_pos8-14.tif:78	94.806	66.882	30.5749	21.5694
78	14	79	551.945	104.977		p1_w11 GFP_pos8-14.tif:79	92.67	71.106	29.8861	22.9317
79	14	80	566.056	107.661		p1_w11 GFP_pos8-14.tif:80	91.238	70.31	29.4243	22.675
80	14	81	583.654	111.008		p1_w11 GFP_pos8-14.tif:81	87.13	67.308	28.0994	21.7068		0.681066	1.48714
81	14	82	562.26	106.939		p1_w11 GFP_pos8-14.tif:82	86.245	65.085	27.814	20.9899
82	14	83	554.453	105.454		p1_w11 GFP_pos8-14.tif:83	86.723	62.448	27.9682	20.1395
83	14	84	553.343	105.243		p1_w11 GFP_pos8-14.tif:84	86.813	61.975	27.9972	19.9869
84	14	85	578.997	110.122		p1_w11 GFP_pos8-14.tif:85	90.088	67.764	29.0534	21.8539
85	14	86	556.394	105.823		p1_w11 GFP_pos8-14.tif:86	90.691	81.537	29.2478	26.2957		0.946075	-0.473839
86	14	87	539.145	102.543		p1_w11 GFP_pos8-14.tif:87	89.553	82.251	28.8808	26.5259
87	14	88	532.878	101.351		p1_w11 GFP_pos8-14.tif:88	85.483	89.069	27.5683	28.7248
88	14	89	504.19	95.8945		p1_w11 GFP_pos8-14.tif:89	84.323	90.111	27.1942	29.0608
89	14	90	503.247	95.715		p1_w11 GFP_pos8-14.tif:90	84.221	89.285	27.1613	28.7944
90	14	91	490.521	93.2948		p1_w11 GFP_pos8-14.tif:91	87.564	90.121	28.2394	29.064		0.58926	-2.53093
91	14	92	498.319	94.7778		p1_w11 GFP_pos8-14.tif:92	94.831	91.454	30.583	29.4939
92	14	93	508.046	96.6279		p1_w11 GFP_pos8-14.tif:93	97.036	89.929	31.2941	29.0021
93	14	94	497.254	94.5753		p1_w11 GFP_pos8-14.tif:94	98.535	88.144	31.7775	28.4264
94	14	95	497.569	94.6352		p1_w11 GFP_pos8-14.tif:95	98.002	89.121	31.6056	28.7415
95	14	96	493.11	93.787		p1_w11 GFP_pos8-14.tif:96	95.892	90.077	30.9252	29.0498		0.537163	-0.000549339
96	14	97	490.189	93.2316		p1_w11 GFP_pos8-14.tif:97	97.253	88.881	31.3641	28.6641
97	14	98	513.748	97.7123		p1_w11 GFP_pos8-14.tif:98	96.041	86.663	30.9732	27.9488
98	14	99	515.524	98.0502		p1_w11 GFP_pos8-14.tif:99	94.73	85.557	30.5504	27.5921
99	14	100	541.839	103.055		p1_w11 GFP_pos8-14.tif:100	97.657	82.152	31.4944	26.494
100	14	101	548.048	104.236		p1_w11 GFP_pos8-14.tif:101	99.556	78.636	32.1068	25.3601		0.774863	2.34439
101	14	102	540.509	102.802		p1_w11 GFP_pos8-14.tif:102	100.394	73.214	32.3771	23.6115
102	14	103	576.18	109.587		p1_w11 GFP_pos8-14.tif:103	99.57	66.821	32.1113	21.5498
103	14	104	564.046	107.279		p1_w11 GFP_pos8-14.tif:104	94.025	58.999	30.3231	19.0272
104	14	105	522.361	99.3505		p1_w11 GFP_pos8-14.tif:105	93.09	57.166	30.0215	18.436
105	14	106	558.878	106.296		p1_w11 GFP_pos8-14.tif:106	93.142	58.543	30.0383	18.8801		1.36043	-0.0675451
106	14	107	538.014	102.328		p1_w11 GFP_pos8-14.tif:107	88.919	55.675	28.6764	17.9552
107	14	108	547.605	104.152		p1_w11 GFP_pos8-14.tif:108	88.156	55.542	28.4303	17.9123
108	14	109	547.102	104.056		p1_w11 GFP_pos8-14.tif:109	85.603	53.391	27.607	17.2186
109	14	110	527.143	100.26		p1_w11 GFP_pos8-14.tif:110	84.254	52.155	27.1719	16.82
110	14	111	530.469	100.893		p1_w11 GFP_pos8-14.tif:111	85.916	51.649	27.7079	16.6568		0.644168	-0.951844
