# Supplementary material for: A mechano-osmotic feedback couples cell volume to the rate of cell deformation
Source: eLife journal article supplement (doi:10.7554/elife.72381), 2022-04-13
Supplement: supp [file examples.xlsx]

## Sheet: hyper
piso/p	0.88			0.78			0.61			0.51			0.4			0.18
t (s)	V (%)		t (s)	V (%)		t (s)	V (%)		t (s)	V (%)		t (s)	V (%)		t (s)	V (%)
4.5			4	100		0	100		11.5	100		14	100		10.7	100
4.6			4.1	99.7648		0.1	100.208		11.6	100.434		14.1	100.022		10.8	100.027
4.7			4.2	99.8255		0.2	99.9425		11.7	100.706		14.2	100.2		10.9	100.108
4.8			4.3	99.9452		0.3	100.096		11.8	100.553		14.3	100.113		11	99.9052
4.9			4.4	99.8372		0.4	100.135		11.9	100.759		14.4	100.384		11.1	99.7586
5			4.5	99.6646		0.5	100.045		12	100.053		14.5	100.143		11.2	99.6508
5.1			4.6	100.354		0.6	100.249		12.1	100.169		14.6	99.6668		11.3	99.8836
5.2			4.7	99.6596		0.7	100.277		12.2	99.9724		14.7	100.067		11.4	100.025
5.3			4.8	100.127		0.8	100.344		12.3	100.267		14.8	100.274		11.5	100.174
5.4			4.9	99.9862		0.9	100.319		12.4	100.26		14.9	99.9499		11.6	100.071
5.5			5	99.9041		1	100.438		12.5	100.499		15	100.15		11.7	100.33
5.6			5.1	100.238		1.1	100.353		12.6	100.002		15.1	100.519		11.8	100
5.7			5.2	100.119		1.2	101.552		12.7	100.318		15.2	100.285		11.9	100.054
5.8			5.3	100.046		1.3	100.365		12.8	100.635		15.3	100.189		12	100.181
5.9			5.4	100.296		1.4			12.9	100.284		15.4	100.213		12.1	99.9818
6			5.5	100.01		1.5			13	101.179		15.5	100.246		12.2	100.112
6.1			5.6	100.147		1.6			13.1			15.6	100.642		12.3	100.32
6.2			5.7	99.8751		1.7			13.2			15.7	100.265		12.4	100.512
6.3			5.8	99.6005		1.8	103.138		13.3			15.8	100.346		12.5
6.4			5.9	100.076		1.9	101.685		13.4			15.9	100.33		12.6
6.5			6	100.371		2	95.0557		13.5			16	101.496		12.7
6.6			6.1	100.364		2.1	100.23		13.6			16.1			12.8
6.7			6.2			2.2	99.2183		13.7			16.2			12.9	101.564
6.8			6.3	100.689		2.3	98.2965		13.8	100.444		16.3			13	101.926
6.9			6.4	101.303		2.4	98.0972		13.9	100.959		16.4			13.1	102.83
7			6.5	100.974		2.5	98.5522		14	100.842		16.5	101.057		13.2	103.136
7.1			6.6	100.605		2.6	98.9486		14.1	100.942		16.6	101.244		13.3	102.966
7.2			6.7	100.635		2.7	100.135		14.2	100.714		16.7	102.206		13.4	101.995
7.3			6.8	100.66		2.8	102.433		14.3	101.267		16.8	101.634		13.5	101.507
7.4			6.9	99.9962		2.9	102.118		14.4			16.9	101.314		13.6	101.223
7.5			7	100.506		3			14.5	100.979		17	101.04		13.7	101.036
7.6			7.1	100.029		3.1			14.6	101.865		17.1	100.966		13.8
7.7			7.2	100.029		3.2			14.7			17.2	100.846		13.9
7.8			7.3			3.3	100.606		14.8			17.3	101.746		14	100.347
7.9			7.4			3.4			14.9			17.4	101.282		14.1	100.505
8			7.5			3.5			15			17.5			14.2	100.612
8.1			7.6	100.172		3.6	101.666		15.1	100.988		17.6	101.405		14.3	101.358
8.2			7.7	101.242		3.7	101.526		15.2	101		17.7	102.51		14.4	101.3
8.3			7.8	101.318		3.8	101.488		15.3			17.8	100.617		14.5	101.333
8.4			7.9	101.275		3.9	101.494		15.4	100.753		17.9	100.458		14.6	101.136
8.5			8	101.374		4	101.505		15.5	101.456		18	100.277		14.7	100.921
8.6			8.1	101.339		4.1	101.53		15.6	100.97		18.1	100.403		14.8	100.677
8.7			8.2	102.163		4.2	101.389		15.7	100.939		18.2	100.725		14.9	100.779
8.8			8.3	101.462		4.3	101.25		15.8	101.18		18.3	100.84		15	101.235
8.9			8.4	101.646		4.4	101.661		15.9	101.752		18.4	100.816		15.1	101.116
9			8.5	101.692		4.5	101.615		16	100.706		18.5	100.936		15.2	100.887
9.1			8.6	101.767		4.6	101.32		16.1	100.458		18.6	100.938		15.3	100.778
9.2			8.7	101.609		4.7	101.582		16.2	100.638		18.7	101.064		15.4	100.941
9.3			8.8	101.45		4.8	101.01		16.3	100.776		18.8	101.271		15.5	101.064
9.4			8.9	101.43		4.9	101.278		16.4	100.86		18.9	100.741		15.6	100.939
9.5			9	101.487		5	101.119		16.5	99.6655		19	100.409		15.7	101.405
9.6			9.1	101.468		5.1	101.082		16.6	101.351		19.1	100.768		15.8	101.263
9.7			9.2	101.372		5.2	101.499		16.7			19.2	101.052		15.9
9.8			9.3	101.74		5.3			16.8			19.3	101.035		16	101.971
9.9			9.4	102.829		5.4	101.821		16.9			19.4	101.079		16.1
10			9.5			5.5	102.108		17	100.144		19.5	101.067		16.2
10.1			9.6			5.6	101.484		17.1	100.127		19.6	101.634		16.3
10.2			9.7	101.893		5.7	101.819		17.2	100.433		19.7			16.4	101.533
10.3			9.8	101.289		5.8	97.9887		17.3	100.975		19.8			16.5	101.397
10.4			9.9	101.059		5.9	101.238		17.4	100.65		19.9	100.939		16.6	100.317
10.5			10	101.078		6	101.409		17.5	100.88		20	100.957		16.7	101.268
10.6			10.1	100.626		6.1	101.398		17.6	100.202		20.1	101.585		16.8	101.114
10.7			10.2	100.49		6.2	101.237		17.7	100.776		20.2	101.848		16.9	101.222
10.8			10.3	101.022		6.3	101.307		17.8			20.3	99.514		17	101.75
10.9			10.4	100.934		6.4	101.444		17.9			20.4			17.1	101.7
11			10.5			6.5	101.092		18	99.8583		20.5	100.329		17.2	101.639
11.1			10.6	101.149		6.6	101.012		18.1	99.8411		20.6			17.3	101.487
11.2			10.7	100.836		6.7	100.857		18.2	99.3625		20.7			17.4	101.257
11.3			10.8	100.403		6.8	101.106		18.3	100.162		20.8			17.5	101.433
11.4			10.9	101.102		6.9	101.253		18.4	99.7518		20.9			17.6	101.402
11.5			11	100.589		7	101.299		18.5	100.417		21			17.7	101.503
11.6			11.1	100.562		7.1	101.294		18.6	100.858		21.1			17.8	101.119
11.7			11.2	100.528		7.2	101.293		18.7	98.9924		21.2	92.9135		17.9	100.97
11.8			11.3	100.931		7.3	101.264		18.8	98.1708		21.3	92.1873		18	101.559
11.9			11.4	100.611		7.4	100.985		18.9	100.607		21.4	87.1718		18.1	100.999
12			11.5	101.104		7.5	101.264		19			21.5	85.9054		18.2	101.198
12.1			11.6	100.54		7.6	101.201		19.1			21.6	83.6354		18.3	101.297
12.2			11.7	100.95		7.7	101.403		19.2	100.776		21.7	80.3125		18.4	101.345
12.3			11.8	100.987		7.8	101.31		19.3			21.8	77.9329		18.5	101.17
12.4			11.9	100.932		7.9	100.837		19.4	99.6973		21.9	75.3632		18.6	101.058
12.5			12	100.933		8	101.313		19.5	99.6466		22			18.7	101.116
12.6			12.1	100.552		8.1	100.931		19.6	99.6627		22.1	71.5807		18.8	101.327
12.7			12.2			8.2	101.138		19.7	99.0418		22.2	70.5624		18.9	101.129
12.8			12.3	100.616		8.3	101.134		19.8	100.109		22.3	68.3628		19	101.308
12.9			12.4	100.744		8.4	101.076		19.9	99.9068		22.4	67.2939		19.1	101.482
13			12.5	101.032		8.5	101.225		20	99.3		22.5			19.2	101.428
13.1			12.6	100.857		8.6	100.942		20.1	99.9778		22.6	64.7787		19.3	101.685
13.2			12.7	101.001		8.7	101.345		20.2	99.8471		22.7	63.4866		19.4	101.277
13.3			12.8	100.955		8.8	101.069		20.3	99.5938		22.8	62.7631		19.5	101.63
13.4			12.9	101.316		8.9	101.34		20.4	98.6784		22.9			19.6	101.283
13.5			13	100.892		9	101.191		20.5	98.0577		23	61.8159		19.7	101.705
13.6			13.1	101.128		9.1	101.092		20.6	97.0755		23.1	61.0941		19.8	101.551
13.7			13.2	100.444		9.2	101.32		20.7	96.8971		23.2	60.6035		19.9	101.565
13.8			13.3	100.928		9.3	100.905		20.8	96.1158		23.3			20	101.189
13.9			13.4	100.684		9.4	101.046		20.9	95.2152		23.4	60.0861		20.1	101.287
14			13.5	100.957		9.5	101.267		21	94.1854		23.5	60.0531		20.2	100.722
14.1			13.6	100.627		9.6	101.07		21.1	93.3968		23.6	59.6338		20.3	99.8673
14.2			13.7	100.447		9.7	101.047		21.2	91.3395		23.7	59.5926		20.4	98.534
14.3			13.8	101.127		9.8	101.034		21.3			23.8	59.28		20.5	97.2672
14.4			13.9	100.941		9.9	101.271		21.4	89.1357		23.9	59.1021		20.6	96.2212
14.5			14	100.697		10	101.519		21.5	88.3181		24			20.7	94.4477
14.6	100		14.1	100.181		10.1	101.095		21.6	86.5626		24.1	58.866		20.8	92.0805
14.7	100.213		14.2	100.544		10.2	101.175		21.7	81.6136		24.2	58.6834		20.9	90.8038
14.8	99.7553		14.3	100.219		10.3	101.387		21.8	80.9208		24.3	58.3567		21	89.3818
14.9	99.8808		14.4	99.6771		10.4	101.055		21.9	80.3546		24.4	58.5746		21.1	87.1318
15	99.6466		14.5			10.5	101.1		22	78.9899		24.5	58.5254		21.2	85.3519
15.1	99.537		14.6	99.816		10.6	100.81		22.1	77.876		24.6	58.3968		21.3	83.5307
15.2	99.5452		14.7	100.484		10.7	101.365		22.2	76.3509		24.7	58.036		21.4	81.8655
15.3	100.116		14.8	100.821		10.8	101.242		22.3	75.3264		24.8	57.9701		21.5	80.3486
15.4	100.33		14.9	100.351		10.9	101.486		22.4	74.7873		24.9	57.9216		21.6	78.7402
15.5	99.8698		15	100.377		11	101.072		22.5	73.6133		25	58.0955		21.7	76.9586
15.6	99.6837		15.1	100.243		11.1	101.247		22.6	73.8118		25.1	58.3807		21.8	74.8732
15.7	99.5801		15.2	100.274		11.2	101.64		22.7	72.5382		25.2	57.9836		21.9	72.7066
15.8	99.7753		15.3	100.252		11.3	101.072		22.8	71.7585		25.3	58.0725		22	69.7047
15.9	100.353		15.4	100.18		11.4	101.095		22.9	72.0626		25.4	57.966		22.1	67.0968
16	99.8873		15.5	100.234		11.5	101.39		23	71.2798		25.5	57.9491		22.2	64.2942
16.1	100.162		15.6	100.685		11.6	101.292		23.1	70.2296		25.6	57.7576		22.3	60.9813
16.2	99.8722		15.7	100.332		11.7	101.046		23.2	69.4083		25.7	57.9159		22.4	58.798
16.3	99.4216		15.8	100.239		11.8	101.102		23.3	68.2704		25.8	57.9674		22.5	56.7659
16.4	99.9645		15.9	100.176		11.9	101.13		23.4	68.63		25.9	58.05		22.6	55.0307
16.5	99.9498		16	100.294		12	101.123		23.5	68.8143		26	57.7887		22.7	53.6088
16.6	99.4008		16.1	100.263		12.1	101.094		23.6	68.7945		26.1	57.5974		22.8	52.1966
16.7	99.9576		16.2	100.598		12.2	101.022		23.7	67.9422		26.2	57.8877		22.9	50.9961
16.8	100.044		16.3	100.521		12.3	101.345		23.8	66.6556		26.3	57.5655		23	50.8788
16.9	100.294		16.4	100.558		12.4	101.267		23.9	67.6459		26.4	57.9416		23.1	49.916
17	99.9077		16.5	100.622		12.5	101.202		24	67.1484		26.5	58.036		23.2	49.3668
17.1			16.6	100.549		12.6	101.179		24.1	66.9215		26.6	58.1055		23.3	48.6441
17.2			16.7	100.226		12.7	101.002		24.2	66.0952		26.7	58.1243		23.4	48.2958
17.3			16.8	100.381		12.8	100.846		24.3	66.3443		26.8	57.8007		23.5	47.8051
17.4			16.9	100.72		12.9	100.671		24.4	66.469		26.9	57.9547		23.6	47.4147
17.5			17	100.276		13	101.048		24.5	66.0346		27	58.3616		23.7	47.5209
17.6	99.7866		17.1	100.695		13.1	100.943		24.6	65.9456		27.1	58.229		23.8	47.4165
17.7	99.7205		17.2	100.476		13.2	101.032		24.7	66.6998		27.2	58.1128		23.9	47.084
17.8	99.9778		17.3	100.424		13.3	101.013		24.8	66.2474		27.3	58.3426		24	46.9779
17.9	99.6142		17.4	100.415		13.4	101.102		24.9	64.9941		27.4	58.5157		24.1	46.101
18	99.8715		17.5	100.545		13.5	100.919		25	65.7545		27.5	58.103		24.2	46.6721
18.1	100.066		17.6	100.872		13.6	100.883		25.1	65.487		27.6	58.1535		24.3	46.4047
18.2	99.9687		17.7	100.849		13.7	100.925		25.2	66.0689		27.7	58.6456		24.4	46.1859
18.3	99.7674		17.8	100.882		13.8	100.88		25.3	64.7114		27.8	58.1861		24.5	45.8712
18.4	100.232		17.9	100.811		13.9	101.059		25.4	64.5868		27.9	58.1995		24.6	45.9669
18.5	99.803		18	100.719		14	101.307		25.5	65.1391		28	57.9978		24.7	45.8938
18.6	100.081		18.1	100.73		14.1	101.071		25.6	65.3454		28.1	58.253		24.8	45.7856
18.7	100.113		18.2	100.754		14.2	100.915		25.7	65.7403		28.2	58.1531		24.9	45.7176
18.8	99.7363		18.3	100.829		14.3	101.137		25.8	65.3619		28.3	58.2238		25	45.6698
18.9	99.851		18.4	100.682		14.4	101.018		25.9	65.3281		28.4	58.561		25.1	46.0057
19	99.6221		18.5	100.184		14.5	101.213		26	64.7779		28.5	58.1605		25.2	45.922
19.1	99.9329		18.6	100.458		14.6	101.002		26.1	63.0628		28.6	58.3594		25.3	45.9236
19.2	100.175		18.7	100.631		14.7	100.862		26.2	65.0214		28.7	58.2721		25.4	45.7869
19.3	99.858		18.8	100.515		14.8	101.406		26.3	63.6845		28.8	58.1611		25.5	46.336
19.4	99.504		18.9	100.759		14.9	100.729		26.4	64.7033		28.9	58.2471		25.6	45.8185
19.5	100.211		19	100.647		15	101.075		26.5	65.6405		29	58.3497		25.7	45.7489
19.6	99.6745		19.1	100.584		15.1	100.915		26.6	64.1196		29.1	58.1402		25.8	46.0378
19.7	99.8064		19.2	100.115		15.2	100.894		26.7	64.6284		29.2	58.2898		25.9	46.0442
19.8	99.7453		19.3	100.323		15.3	101.07		26.8	64.0883		29.3	58.5295		26	46.151
19.9	99.8562		19.4	100.231		15.4	100.927		26.9	64.7613		29.4	58.515		26.1	46.1642
20	100.103		19.5	100.479		15.5	101.075		27	63.6717		29.5	58.4811		26.2	46.3823
20.1	99.1753		19.6	100.512		15.6	101.212		27.1	64.9098		29.6	58.5198		26.3	46.24
20.2	99.3962		19.7	100.553		15.7	100.811		27.2	64.7002		29.7	58.4765		26.4	46.1542
20.3	99.5819		19.8	100.404		15.8	101.016		27.3	64.8946		29.8	58.5807		26.5	46.2006
20.4	99.8495		19.9	100.151		15.9	100.786		27.4	63.3		29.9	58.5927		26.6	45.86
20.5	99.2348		20	100.457		16	100.837		27.5	63.3818		30	58.6206		26.7	46.1188
20.6	99.5681		20.1	100.155		16.1	100.994		27.6	64.6371		30.1	58.4689		26.8	45.8632
20.7	99.8261		20.2	100.129		16.2	100.962		27.7	64.3969		30.2	58.175		26.9	46.2687
20.8	99.8654		20.3	99.8581		16.3	100.832		27.8	64.2826		30.3	58.3693		27	46.0137
20.9	98.8968		20.4	99.8635		16.4	100.783		27.9	62.7857		30.4	58.7066		27.1	46.1292
21	99.327		20.5	100.075		16.5	100.933		28	62.4049		30.5	58.3747		27.2	45.8951
21.1	99.4116		20.6	99.509		16.6	100.853		28.1	63.5973		30.6	58.668		27.3	45.7074
21.2	99.2649		20.7	99.337		16.7	100.893		28.2	65.6963		30.7	58.2597		27.4	45.9026
21.3	98.9944		20.8	99.7605		16.8	101.096		28.3	65.4576		30.8	58.4422		27.5	45.4875
21.4	99.2064		20.9	99.6486		16.9	100.864		28.4	64.1363		30.9	58.7035		27.6	45.8469
21.5	99.0928		21	99.6004		17	100.854		28.5	65.4002		31	58.3744		27.7	46.1656
21.6	98.6825		21.1	99.0424		17.1	100.728		28.6	62.836		31.1	58.5063		27.8	45.8685
21.7	98.8633		21.2	98.9886		17.2	101.116		28.7	64.1637		31.2	58.4454		27.9	45.7702
21.8	99.2442		21.3	99.2514		17.3	100.769		28.8	62.4169		31.3	58.3958		28	45.6298
21.9	99.0494		21.4	99.5054		17.4	100.955		28.9	64.5971		31.4	58.6561		28.1	45.3376
22	98.7292		21.5	98.9283		17.5	101.153		29	63.9622		31.5	58.2155		28.2	45.597
22.1	98.9808		21.6	99.0215		17.6	101.049		29.1	64.9747		31.6	58.4757		28.3	45.4085
22.2	98.5162		21.7	98.7497		17.7	100.969		29.2	63.0063		31.7	58.7209		28.4	45.3314
22.3	98.4744		21.8	98.8555		17.8	100.794		29.3	62.7996		31.8	58.3336		28.5	45.3738
22.4	98.1601		21.9	98.7794		17.9	100.904		29.4	62.1446		31.9	58.6343		28.6	45.1667
22.5	98.5411		22	98.8571		18	100.903		29.5	62.8625		32	58.5641		28.7	45.3943
22.6	98.4038		22.1	99.0367		18.1	101.264		29.6	63.2614		32.1	58.5816		28.8	45.3097
22.7	98.8537		22.2	98.0466		18.2	100.835		29.7	62.6479		32.2	58.6526		28.9	45.0897
22.8	98.3417		22.3	98.4682		18.3	100.848		29.8	62.4894		32.3	58.563		29	45.0315
22.9	98.3641		22.4	98.2173		18.4	100.874		29.9	63.1956		32.4	58.5012		29.1	45.0991
23	98.6361		22.5	98.2339		18.5	101.021		30	63.3927		32.5	58.7708		29.2	45.0047
23.1	98.2753		22.6	97.9911		18.6	100.805		30.1	61.8023		32.6	58.6213		29.3	45.3234
23.2	98.3794		22.7	98.2689		18.7	101.09		30.2	63.2948		32.7	58.4955		29.4	45.2091
23.3	98.3597		22.8	98.0855		18.8	100.989		30.3	63.5544		32.8	58.7191		29.5	45.1675
23.4	97.7978		22.9	97.876		18.9	100.632		30.4	62.1828		32.9	58.5366		29.6	45.219
23.5	98.0465		23	97.6498		19	100.733		30.5	62.4552		33	58.4639		29.7	45.2061
23.6	97.5482		23.1	97.5113		19.1	100.631		30.6	62.8222		33.1	58.749		29.8	45.1158
23.7	97.7312		23.2	97.5197		19.2	100.71		30.7	62.5502		33.2	58.5279		29.9	45.3241
23.8	97.2125		23.3	97.312		19.3	100.736		30.8	63.2234		33.3	58.4439		30	45.1912
23.9	98.3526		23.4	97.3248		19.4	100.553		30.9	61.7623		33.4	58.5675		30.1	45.2819
24	97.7715		23.5	97.3616		19.5	100.875		31	64.225		33.5	58.5716		30.2	45.2274
24.1	97.6008		23.6	97.4264		19.6	100.399		31.1	62.3399		33.6	58.4609		30.3	45.5505
24.2	97.7797		23.7	97.481		19.7	100.328		31.2	63.0692		33.7	58.7942		30.4	45.3631
24.3	97.5151		23.8	97.2097		19.8	100.439		31.3	62.8164		33.8	58.6662		30.5	45.4044
24.4	97.3131		23.9	97.0936		19.9	100.281		31.4	62.2876		33.9	58.374		30.6	45.4877
24.5	97.2067		24	96.4824		20	100.36					34	58.9463		30.7	45.8381
24.6	97.3852		24.1	96.5784		20.1	99.7392					34.1	58.6661		30.8	45.7503
24.7	96.6648		24.2	96.5503		20.2	99.8491					34.2	58.4886		30.9	46.0934
24.8	97.144		24.3	96.1019		20.3	99.7775					34.3	58.7919		31	45.6542
24.9	96.8189		24.4	96.4		20.4	99.6104					34.4	59.0132		31.1	46.4516
25	96.7529		24.5	95.8603		20.5	99.4047					34.5	58.8509		31.2	46.1953
25.1	96.8668		24.6	96.0537		20.6	98.6099					34.6	58.586		31.3	46.4142
25.2	97.0663		24.7	96.0768		20.7	98.7634					34.7	58.5886		31.4	47.0559
25.3	96.4102		24.8	95.8749		20.8	98.1567					34.8	58.8698		31.5	46.8926
25.4	96.8086		24.9	95.4604		20.9	98.0389					34.9	59.157		31.6	46.8601
25.5	96.8674		25	95.5654		21	97.6438					35	59.0111		31.7	47.096
25.6	97.3401		25.1	95.555		21.1	97.414					35.1	58.9421		31.8	47.2265
25.7	96.9806		25.2	95.4319		21.2	96.8927					35.2	58.6994		31.9	47.5099
25.8	96.513		25.3	95.3029		21.3	96.8591					35.3	58.994		32	47.8957
25.9	96.191		25.4	95.296		21.4	96.637					35.4	58.9003		32.1	47.7842
26	96.844		25.5	94.9878		21.5	96.0271					35.5	59.0561		32.2	47.8145
26.1	96.4077		25.6	95.288		21.6	95.6729					35.6	58.9659		32.3	48.3007
26.2	96.1291		25.7	94.7391		21.7	95.3623					35.7	59.1388		32.4	48.2585
26.3	96.1842		25.8	95.1347		21.8	94.8676					35.8	58.9138		32.5	48.5844
26.4	97.1231		25.9	94.9017		21.9	94.5356					35.9	59.0098		32.6	48.1028
26.5	96.5373		26	94.5296		22	94.1069					36	59.1562		32.7	48.7289
26.6	96.4643		26.1	95.0408		22.1	93.8726					36.1	59.4429		32.8	48.5334
26.7	96.7182		26.2	94.4792		22.2	93.6078					36.2	58.883		32.9	48.9971
26.8	96.4208		26.3	94.4303		22.3	93.4754					36.3	59.0904		33	49.0494
26.9	96.3487		26.4	94.2181		22.4	92.6372					36.4	59.265		33.1	49.0296
27	95.7337		26.5	94.5952		22.5	92.8084					36.5	59.2202		33.2	48.8506
27.1	95.7187		26.6	94.3134		22.6	91.9026					36.6	59.3787		33.3	49.0925
27.2	95.8818		26.7	94.1515		22.7	91.4336					36.7	59.2054		33.4	48.8407
27.3	95.6794		26.8	94.2853		22.8	91.0746					36.8	58.9136		33.5	48.9765
27.4	96.2003		26.9	93.8876		22.9	90.8609					36.9	59.5561		33.6	49.1113
27.5	96.3969		27	93.9666		23	90.1706					37	59.4326		33.7	49.0333
27.6	96.069		27.1	93.9717		23.1	89.9685					37.1	59.6879		33.8	49.3243
27.7	95.9997		27.2	94.21		23.2	89.2721					37.2	59.5634		33.9	49.1997
27.8	95.934		27.3	94.0517		23.3	89.4079					37.3	59.7844		34	49.2423
27.9	95.6836		27.4	93.9661		23.4	88.7247					37.4	59.6462		34.1	48.9647
28	95.6734		27.5	93.8929		23.5	88.13					37.5	59.7767		34.2	49.2342
28.1	95.8964		27.6	93.6324		23.6	88.3429					37.6	59.6565		34.3	48.9837
28.2	95.8799		27.7	94.1246		23.7	87.925					37.7	59.4731		34.4	48.9089
28.3	95.6724		27.8	93.7114		23.8	87.151					37.8	60.1677		34.5	49.2529
28.4	95.528		27.9	93.4911		23.9	87.0673					37.9	59.5463		34.6	48.8173
28.5	95.9213		28	93.5807		24	86.9076					38	59.769		34.7	48.8098
28.6	96.1992		28.1	93.562		24.1	86.2257					38.1	59.9319		34.8	49.0319
28.7	95.3204		28.2	93.5106		24.2	86.1458					38.2	60.0413		34.9	49.044
28.8			28.3	93.5773		24.3	85.8379					38.3	59.9533		35	48.4429
28.9	95.2493		28.4	93.5028		24.4	85.5103					38.4	59.6683		35.1	48.7863
29	95.4219		28.5	93.0262		24.5	84.7716					38.5	60.0329		35.2	48.6643
29.1	95.8306		28.6	93.6087		24.6	84.7835					38.6	60.092		35.3	48.5819
29.2	95.6077		28.7	93.2119		24.7	84.5556					38.7	59.7577		35.4	48.7199
29.3	95.2226		28.8	93.6914		24.8	84.0217					38.8	60.1862		35.5	48.601
29.4	95.5843		28.9	93.4039		24.9	83.8321					38.9	60.5718		35.6	48.5471
29.5	95.3326		29	93.6043		25	83.5961					39	60.1454		35.7	48.1403
29.6	95.4223		29.1	92.9899		25.1	83.3348					39.1	59.9865		35.8	48.4587
29.7	95.11		29.2	93.0735		25.2	83.028					39.2	60.1581		35.9	48.2038
29.8	94.9556		29.3	93.0685		25.3	83.0259					39.3	60.292		36	48.3328
29.9	94.8632		29.4	93.0653		25.4	82.4508					39.4	60.0855		36.1	48.0484
30	95.3919		29.5	93.1679		25.5	82.2157					39.5	60.1591		36.2	48.2567
30.1	95.5682		29.6	93.2485		25.6	82.3334					39.6	60.2025		36.3	48.0211
30.2	95.5591		29.7	93.4219		25.7	81.8611					39.7	60.3847		36.4	48.0279
30.3	95.6638		29.8	92.8198		25.8	81.8427					39.8	60.7292		36.5	47.9642
30.4	95.6215		29.9	92.8867		25.9	81.4359					39.9	60.4699		36.6	47.8297
30.5	95.2123		30	92.664		26	81.1487					40	60.387		36.7	47.7234
30.6	94.7639		30.1	92.7839		26.1	81.1653					40.1	60.3521		36.8	47.3638
30.7	95.035		30.2	93.0066		26.2	81.053					40.2	60.5022		36.9	47.4947
30.8	95.3109		30.3	92.5078		26.3	80.8271					40.3	60.6471		37	47.3065
30.9	95.1253		30.4	92.6181		26.4	80.6247					40.4	60.7679		37.1	47.1998
31	94.6623		30.5	92.3082		26.5	80.5521					40.5	60.4749		37.2	47.326
31.1	95.0892		30.6	92.9898		26.6	80.3821					40.6	60.7115		37.3	47.2105
31.2	94.9598		30.7	92.58		26.7	80.0835					40.7	60.2147		37.4	47.4323
31.3	95.105		30.8	92.4092		26.8	80.0127					40.8	60.3687		37.5	47.0482
31.4	94.7153		30.9	92.3857		26.9	79.7279					40.9	60.34		37.6	47.4287
31.5	94.7289		31	92.4343		27	79.9567					41	60.7928		37.7	46.9905
31.6	94.7166		31.1	92.5751		27.1	79.649					41.1	60.6885		37.8	46.7173
31.7	94.8679		31.2	92.9342		27.2	79.4313					41.2	60.4818		37.9	46.8034
31.8	94.3058		31.3	92.4066		27.3	79.5248					41.3	60.4966		38	46.9019
31.9	94.2825		31.4	92.3236		27.4	79.3593					41.4	60.7144		38.1	46.8423
32	94.705		31.5	92.2273		27.5	78.9862					41.5	61.0827		38.2	46.7643
32.1	94.6715		31.6	91.9944		27.6	79.0224					41.6	60.7657		38.3	46.5202
32.2	94.3781		31.7	92.2024		27.7	78.9797					41.7	61.046		38.4	46.4745
32.3	95.024		31.8	92.5744		27.8	78.8096					41.8	61.0251		38.5	46.3044
32.4	94.6461		31.9	92.2003		27.9	78.7107					41.9	60.7782		38.6	46.8833
32.5	94.6795		32	92.2318		28	78.538					42	60.7625		38.7	46.4715
32.6	94.857		32.1	92.3234		28.1	78.6773					42.1	60.8134		38.8	46.5652
32.7	94.9649		32.2	91.9807		28.2	78.4044					42.2	60.8027		38.9	46.4274
32.8	94.4866		32.3	92.0828		28.3	78.1735					42.3	60.7917		39	46.3257
32.9	94.2995		32.4	91.8909		28.4	78.2272					42.4	61.0531		39.1	46.6997
33	94.5003		32.5	92.3869		28.5	78.2759					42.5	60.8373		39.2	46.7993
33.1	94.2613		32.6	92.1668		28.6	78.1874					42.6	60.9709		39.3	46.441
33.2	94.3542		32.7	92.388		28.7	77.9819					42.7	60.699		39.4	46.4693
33.3	94.6098		32.8	91.6208		28.8	78.1778					42.8	60.9356		39.5	46.4538
33.4	94.1263		32.9	91.9865		28.9	77.7193					42.9	60.7783		39.6	46.5405
33.5	94.3646		33	92.0724		29	77.9152					43	61.1695		39.7	46.2091
33.6	94.2833		33.1	92.1996		29.1	77.5889					43.1	60.8334		39.8	46.3506
33.7	94.1722		33.2	91.8206		29.2	77.7847					43.2	60.7821		39.9	46.2555
33.8	94.5685		33.3	92.2238		29.3	77.6035					43.3	61.2161		40	46.1863
33.9	94.0629		33.4	92.1558		29.4	77.4669					43.4	61.1007		40.1	46.3743
34	94.3462		33.5	92.1783		29.5	77.8415					43.5	60.8553		40.2	46.0786
34.1	94.3052		33.6	91.7471		29.6	77.6883					43.6	60.432		40.3	46.2333
34.2	94.7483		33.7	92.1319		29.7	77.591					43.7	61.0423		40.4	46.363
34.3	94.243		33.8	91.866		29.8	77.3091					43.8	60.9732		40.5	45.9728
34.4	94.1137		33.9	91.9217		29.9	77.5834					43.9	60.8847		40.6	45.9319
	94.8424		34	91.7514		30	77.6118					44	61.0459		40.7	45.8193
			34.1	91.8458		30.1	77.393					44.1	60.7384		40.8	46.2734
			34.2	92.0996								44.2	60.9054		40.9	46.0713
			34.3	91.5627								44.3	61.1847
			34.4	92.0165								44.4	61.2378
			34.5	91.6063								44.5	61.1332
												44.6	60.7268
												44.7	61.0767
												44.8	61.2826
												44.9	60.9596
												45	61.163
												45.1	61.305
												45.2	60.8878
												45.3	61.4087
												45.4	60.8758
												45.5	61.3575

## Sheet: hypo
piso/p	1.14			1.25			1.42			1.66			2.01			inf
	V (%)	t (s)		V (%)	t (s)		V (%)	t (s)		V (%)	t (s)		V (%)	t (s)		V (%)	t (s)
		10		101.406	10					102.787	10		103.799	10		101.672	10
		10.1		102.097	10.2					102.766	10.1		103.79	10.1		101.805	10.2
	102.002	10.2		101.928	10.4					103.084	10.2		103.983	10.2		102.576	10.3
	102.322	10.4		102.267	10.5					103.291	10.3		104.224	10.5		102.093	10.4
	102.614	10.5		102.385	10.6					102.789	10.4		104.323	10.6		102.358	10.5
	103.762	10.7		103.783	10.7		103.823	10.7		102.496	10.5		103.766	10.7		102.617	10.6
	103.82	10.8		104.62	10.8		103.66	11.1		102.128	10.7		103.426	10.8		102.288	10.7
	103.039	10.9		105.017	10.9			11.5		103.092	11		104.039	10.9		102.904	10.8
	103.557	11		105.875	11		108.553	11.6		105.187	11.1		104.556	11		103.188	10.9
	105.211	11.1		106.034	11.1		110.908	11.9		105.377	11.2		104.879	11.1		102.388	11
	104.784	11.2		106.937	11.3		112.014	12		106.253	11.3		106.537	11.2		104.022	11.1
	103.994	11.3		107.772	11.4		113.143	12.1		106.527	11.4		107.412	11.3		104.998	11.2
	105.102	11.4		107.794	11.5		114.789	12.3		107.855	11.5		109.849	11.4		106.403	11.3
	106.017	11.5		108.305	11.6		116.531	12.4		108.413	11.6		111.658	11.5		108.548	11.4
	106.333	11.7		109.185	11.7		115.972	12.5		108.971	11.7		112.784	11.6		110.751	11.5
	105.451	11.8		109.798	11.8		117.302	12.6		110.451	11.8		115.037	11.7		112.29	11.6
	106.831	11.9		109.519	11.9		116.796	12.7		110.9	11.9		117.112	11.8		116.111	11.7
	105.721	12.1		110.449	12		118.631	12.8		112.684	12		118.868	11.9		118.843	11.8
	106.202	12.3		110.115	12.1		118.629	12.9		113.982	12.1		120.873	12		122.479	11.9
	105.604	12.4		111.027	12.2		118.996	13		114.333	12.2		122.004	12.1		125.281	12
	105.591	12.5		111.265	12.3		119.628	13.1		116.26	12.5		123.479	12.2		129.363	12.1
	105.806	12.6		110.879	12.4		119.495	13.2		117.172	12.6		124.657	12.3		133.555	12.2
	107.245	12.7		111.062	12.5			13.3		118.018	12.7		126.374	12.4		137.24	12.3
	105.618	12.8		111.796	12.6		120.323	13.4		118.304	12.8		127.596	12.5		140.764	12.4
	105.732	12.9		112.374	12.7		120.65	13.5		119.621	12.9		128.468	12.6		145.433	12.5
	106.207	13		113.128	12.8		121.258	13.6		120.85	13		129.011	12.7		149.941	12.6
	106.194	13.1		113.07	13		121.254	13.8		120.756	13.1		130.215	12.8		153.647	12.7
	106.251	13.2		113.139	13.1		121.354	13.9		121.255	13.2		131.179	12.9		157.902	12.8
	106.237	13.3		113.978	13.3		122.441	14		121.78	13.3		131.497	13		162.202	12.9
	105.755	13.4		114.655	13.4		122.437	14.1		122.65	13.4		132.609	13.1		166.397	13
	105.953	13.5		114.831	13.5		121.925	14.3		123.197	13.5		132.038	13.2		170.828	13.1
	106.779	13.6		114.659	13.6		121.775	14.4		123.153	13.6		133.959	13.3		174.364	13.2
	107.01	13.7		114.711	13.7		122.036	14.5		124.079	13.7		135.107	13.4		178.052	13.3
	106.332	13.8		115.007	13.8		122.794	14.6		124.561	13.8		134.946	13.5		182.072	13.4
	106.765	13.9		115.844	13.9		121.543	14.7		124.714	13.9		135.929	13.6		185.696	13.5
	106.536	14		116.08	14		122.112	14.8		125.423	14		137.091	13.7		189.402	13.6
	106.768	14.1		114.923	14.1		123.085	14.9		126.352	14.1		137.349	13.8		192.163	13.7
	107.135	14.2		115.818	14.2		122.153	15		126.433	14.2		138.045	13.9		195.266	13.8
	106.578	14.3		115.946	14.3		123.014	15.1		126.917	14.3		139.144	14		199.012	13.9
	107.252	14.4		116.385	14.4		122.54	15.3		127.676	14.4		139.762	14.1		202.399	14
	106.181	14.5		115.939	14.5		121.78	15.4		128	14.5		139.683	14.2		205.03	14.1
	106.611	14.6		116.222	14.6		122.588	15.5		128.451	14.6		140.366	14.3		207.797	14.2
	107.073	14.7		116.585	14.7		123.092	15.6		128.085	14.7		140.769	14.4		210.856	14.3
	106.179	14.8		116.048	14.8		120.672	15.7		128.163	14.8		140.454	14.5		214.345	14.4
	106.572	14.9		117.307	14.9		121.772	15.9		129.344	14.9		140.676	14.6		216.831	14.5
	106.49	15		116.783	15		122.556	16		129.173	15		141.884	14.7		220.189	14.6
	107.383	15.1		117.596	15.1		121.219	16.1		129.773	15.1		141.759	14.8		222.503	14.7
	105.959	15.2		117.279	15.2		121.647	16.2		129.829	15.2		141.432	14.9		225.013	14.8
	106.494	15.3		115.85	15.3		121.908	16.3		129.593	15.3		141.67	15		227.628	14.9
	105.946	15.4		116.26	15.4		122.068	16.4		130.684	15.4		142.294	15.1		230.056	15
	107.405	15.5		117.218	15.5		120.873	16.5		130.235	15.5		142.705	15.2		232.616	15.1
	105.809	15.6		117.006	15.6		121.787	16.6		131.135	15.6		142.444	15.3		235.139	15.2
	106.287	15.7		117.045	15.7		121.409	16.7		130.95	15.7			15.4		237.472	15.3
	105.916	15.8		117.751	15.8		121.17	16.8		130.959	15.8			15.5		239.163	15.4
	106.432	15.9		117.174	15.9		121.455	16.9		131.001	15.9		142.969	15.6		240.703	15.5
	106.223	16		117.072	16		121.108	17		131.465	16		143.294	15.7		243.519	15.6
	106.35	16.1		117.53	16.1		121.149	17.1		131.925	16.1		143.389	15.8		245.503	15.7
	106.188	16.2		118.082	16.2		120.818	17.2		132.214	16.2		143.744	15.9		247.568	15.8
	107.06	16.3		117.547	16.3		120.568	17.3		132.461	16.3		143.293	16		249.373	15.9
	105.966	16.4		118.857	16.4		121.252	17.4		132.312	16.4		143.606	16.1		250.641	16
	105.496	16.5		118.195	16.5		120.707	17.5		132.557	16.5		142.851	16.2		252.988	16.1
	105.834	16.6		118.153	16.6		120.562	17.6		132.319	16.6		143.713	16.3		254.743	16.2
	106.494	16.7		118.097	16.7		120.73	17.7		133.211	16.7		143.633	16.4		256.204	16.3
	106.023	16.8		118.345	16.8		120.336	17.8		133.405	16.8		143.811	16.5		258.305	16.4
	106.277	16.9		118.47	16.9		120.207	17.9		133.527	16.9		143.61	16.6		260.309	16.5
	106.929	17		118.518	17		120.933	18		133.591	17		143.732	16.7		260.772	16.6
	106.027	17.1		118.361	17.1		120.073	18.3		133.134	17.1		143.949	16.8		263.353	16.7
	106.24	17.2		118.363	17.2		120.607	18.4		132.858	17.2		143.669	16.9		264.525	16.8
	105.971	17.3		118.858	17.3		120.588	18.7		134	17.3		144.268	17		265.735	16.9
	106.224	17.4		118.458	17.4		120.698	18.8		133.457	17.4		143.663	17.1		267.697	17
	106.111	17.5		119.183	17.5		120.34	19		133.487	17.5		143.85	17.2		269.629	17.1
	106.381	17.6		118.586	17.6		119.448	19.1		133.58	17.6		142.85	17.3		269.847	17.2
	106.993	17.7		118.687	17.7		119.458	19.2		134.457	17.7		144.035	17.4		271.169	17.3
	106.954	17.8		118.907	17.8		119.847	19.3		134.18	17.8		143.919	17.5		272.375	17.4
	105.895	17.9		118.73	17.9		120.028	19.4		135.102	17.9		143.269	17.6		274.156	17.5
	106.57	18		118.322	18		119.696	19.5		135.031	18		143.917	17.7		275.32	17.6
	106.199	18.1		118.579	18.1		118.842	19.6		134.55	18.1		143.609	17.8		276.477	17.7
	106.395	18.3		118.594	18.2		118.93	19.8		135.247	18.2		143.95	17.9		277.706	17.8
	106.046	18.4		119.031	18.3		118.608	19.9		134.692	18.3		143.575	18		278.624	17.9
	106.026	18.5		119.04	18.4		119.041	20		135.396	18.4		143.501	18.1		280.18	18
	105.759	18.6		119.039	18.5		119.577	20.1		134.836	18.5		144.272	18.2		281	18.1
	105.527	18.7		118.681	18.6		118.45	20.2		135.823	18.6		142.798	18.3		281.572	18.2
	105.968	18.8		118.984	18.7		118.317	20.3		135.058	18.7		143.417	18.4		283.549	18.3
	106.19	18.9		119.113	18.8		119.438	20.4		135.437	18.8		144.049	18.5		284.096	18.4
	106.255	19		119.003	18.9		119.908	20.5		136.173	18.9		143.874	18.6		284.602	18.5
	105.527	19.1		118.739	19		119.269	20.6		136.023	19		143.707	18.7		286.108	18.6
	105.664	19.2		119.358	19.1		118.579	20.7		135.708	19.1		143.669	18.8		287.379	18.7
	105.625	19.3		118.977	19.2		119.096	20.8		135.441	19.2		143.618	18.9		288.048	18.8
	105.764	19.4		118.904	19.3		118.685	20.9		135.036	19.3		143.464	19		288.673	18.9
	106.035	19.5		118.833	19.4		118.181	21		136.244	19.4		143.252	19.1		289.533	19
	105.603	19.6		118.43	19.5		119.192	21.2		135.663	19.5		143.457	19.2		290.218	19.1
	106.731	19.7		118.084	19.6		119.064	21.3		136.155	19.6		144.049	19.3		291.124	19.2
	107.041	19.8		118.725	19.7		119.099	21.4		135.629	19.7		143.1	19.4		291.652	19.3
	105.98	19.9		118.051	19.8		118.648	21.5		135.814	19.8		143.327	19.5		292.384	19.4
	105.978	20		118.38	19.9		118.857	21.6		136.701	19.9		143.154	19.6		293.163	19.5
	105.43	20.1		118.724	20		118.928	21.7		136.358	20		142.724	19.7		293.982	19.6
	105.381	20.2		118.847	20.1		118.694	21.8		135.702	20.1		143.797	19.8		294.36	19.7
	105.115	20.3		119.006	20.2		119.11	21.9		136.489	20.2		143.184	19.9		295.604	19.8
	105.41	20.4		118.15	20.3		119.112	22		135.828	20.3		142.987	20		295.982	19.9
	105.778	20.5		119.067	20.4		118.585	22.1		136.649	20.4		142.888	20.1		296.056	20
	105.208	20.6		118.927	20.5		117.908	22.2		136.532	20.5		142.73	20.2		296.715	20.1
	105.341	20.7		118.703	20.6		118.697	22.3		136.484	20.6		143.331	20.3		298.183	20.2
	105.535	20.8		119.098	20.7		117.77	22.4		136.391	20.7		142.832	20.4		298.446	20.3
	104.859	20.9		118.211	20.8		118.548	22.5		136.311	20.8		143.058	20.5		298.621	20.4
	106.955	21		118.967	20.9		118.936	22.6		136.586	20.9		142.18	20.6		299.58	20.5
	106.32	21.1		118.64	21		118.022	22.7		135.886	21		143.481	20.7		300.478	20.6
	104.792	21.2		119.17	21.1		117.352	22.8		136.118	21.1		142.368	20.8		300.467	20.7
	105.059	21.3		118.616	21.2		117.799	22.9		136.635	21.2		142.623	20.9		301.498	20.8
	104.985	21.4		118.602	21.3		117.89	23		136.171	21.3		142.741	21		301.757	20.9
	106.228	21.5		118.43	21.4		117.618	23.1		136.545	21.4		142.747	21.1		302.346	21
	105.629	21.6		118.707	21.5		118.249	23.2		135.834	21.5		142.932	21.2		302.534	21.1
	104.939	21.7		118.606	21.6		118.8	23.3		136.314	21.6		143.111	21.3		303.209	21.2
	105.548	21.8		118.74	21.7		117.56	23.4		136.791	21.7		143.11	21.4		304.018	21.3
	104.662	21.9		118.618	21.8		117.416	23.5		137.166	21.8		143.066	21.5		304.173	21.4
	104.807	22		118.35	21.9		117.906	23.6		136.21	21.9		143.332	21.6		304.374	21.5
	104.8	22.1		118.661	22		117.178	23.7		137.161	22		143.29	21.7		305.313	21.6
	104.967	22.2		118.563	22.1		117.655	23.8		136.679	22.1		143.323	21.8		305.453	21.7
	104.765	22.3		117.889	22.2		116.807	23.9		136.513	22.2		143.047	21.9		305.923	21.8
	104.377	22.4		119.507	22.3		118.266	24		136.977	22.3		143.468	22		305.822	21.9
	104.788	22.5		118.534	22.4		117.05	24.1		136.791	22.4		143.572	22.1		306.156	22
	104.338	22.6		119.124	22.5		117.032	24.2		136.902	22.5		143.5	22.2		305.894	22.1
	104.897	22.7		118.487	22.6		117	24.3		137.403	22.6		143.534	22.3		307.081	22.2
	104.796	22.8		119.27	22.7		117.237	24.4		136.513	22.7		143.254	22.4		307.585	22.3
	104.858	22.9		118.875	22.8		116.868	24.5		137.835	22.8		143.937	22.5		307.843	22.4
	105.233	23		119.08	22.9		117.68	24.6		137.175	22.9		143.727	22.6		307.483	22.5
	103.825	23.1		119.216	23		117.347	24.7		136.941	23		143.683	22.7		309.119	22.6
	105.739	23.2		118.831	23.1		116.988	24.8		137.306	23.1		143.549	22.8		308.207	22.7
	105.374	23.3		118.793	23.2		116.777	24.9		137.207	23.2		143.312	22.9		309.397	22.8
	104.705	23.4		118.788	23.3		117.501	25		136.71	23.3		143.635	23		308.877	22.9
	104.734	23.5		119.121	23.4		116.481	25.1		137.845	23.4		143.827	23.1		308.827	23
	104.708	23.6		118.925	23.5		116.985	25.2		137.722	23.5		143.575	23.2		309.228	23.1
	104.38	23.7		119.033	23.6		117.568	25.3		137.563	23.6		143.761	23.3		310.016	23.2
	104.487	23.8		119.217	23.7		116.927	25.4		137.679	23.7		143.916	23.4		309.363	23.3
	104.611	23.9		118.935	23.8		116.754	25.5		137.773	23.8		144.407	23.5		310.579	23.4
	105.191	24		118.525	23.9		116.764	25.6		137.679	23.9		143.545	23.6		310.182	23.5
	104.155	24.1		119.197	24		116.391	25.7		137.23	24		144.044	23.7		311.173	23.6
	104.761	24.2		119.09	24.1		115.568	25.8		137.763	24.1		143.846	23.8		310.744	23.7
	105.476	24.3		118.597	24.2		116.385	25.9		136.642	24.2		143.815	23.9		311.752	23.8
	104.473	24.4		119.278	24.3		116.421	26		137.19	24.3		144.06	24		311.481	23.9
	104.184	24.5		118.579	24.4		115.587	26.1		137.901	24.4		144.227	24.1		311.204	24
	104.252	24.6		117.67	24.5		115.821	26.2		136.79	24.5		143.883	24.2		311.399	24.1
	103.141	24.7		117.921	24.6		116.286	26.3		137.384	24.6		143.435	24.3		311.991	24.2
	104.41	24.9		118.678	24.7		115.729	26.4		137.685	24.7		143.944	24.4		311.868	24.3
	105.298	25		119.328	24.8		115.977	26.5		137.663	24.8		143.871	24.5		312.347	24.4
	104.247	25.1		118.726	24.9		115.803	26.6		137.424	24.9		143.787	24.6		312.746	24.5
	104.548	25.2		119.033	25		115.75	26.7		137.408	25		143.667	24.7		312.243	24.6
	104.423	25.3		118.421	25.1		115.097	26.8		137.228	25.1		144.058	24.8		312.651	24.7
	105.083	25.4		118.689	25.2		114.823	26.9		137.173	25.2		144.366	24.9		312.73	24.8
	104.528	25.5		119.355	25.3		115.417	27		137.485	25.3		143.758	25		312.593	24.9
	104.691	25.7		119.293	25.4		114.173	27.1		137.76	25.4		143.482	25.1		312.656	25
	106.322	25.8		119.107	25.5		115.066	27.2		137.541	25.5		143.823	25.2		313.228	25.1
	106.22	25.9		118.274	25.6		114.844	27.3		137.679	25.6		143.653	25.3		313.859	25.2
	103.861	26		119.069	25.7		114.954	27.4		137.13	25.7		143.593	25.4		313.064	25.3
	104.203	26.1		118.315	25.8		115.482	27.5		137.258	25.8		143.776	25.5		313.643	25.4
	104.507	26.2		118.885	25.9		114.88	27.6		137.38	25.9		144.321	25.6		313.618	25.5
	104.592	26.3		119.288	26		114.057	27.7		137.082	26		144.106	25.7		313.259	25.6
	103.549	26.4		118.735	26.1		114.772	27.8		137.886	26.1		143.802	25.8		313.737	25.7
	104.077	26.5		119.041	26.2		113.773	27.9		137.852	26.2		144.596	25.9		313.49	25.8
	103.71	26.6		118.885	26.3		113.895	28		137.734	26.3		144.115	26		313.85	25.9
	104.902	26.7		118.621	26.4		113.237	28.1		137.579	26.4		144.237	26.1		314	26
	105.542	26.8		118.579	26.5		114.894	28.2		138.175	26.5		144.326	26.2		314.457	26.1
	103.246	26.9		118.852	26.6		113.801	28.3		137.684	26.6		143.619	26.3		314.503	26.2
	103.921	27		118.858	26.7		112.801	28.4		138.058	26.7		144.162	26.4		314.197	26.3
	105.206	27.1		118.861	26.8		113.897	28.5		138.18	26.8		143.662	26.5		314.529	26.4
	103.906	27.2		119.361	26.9		114.11	28.6		137.765	26.9		144.143	26.6		314.683	26.5
	104.723	27.3		118.515	27		113.757	28.7		138.02	27		144.039	26.7		315.029	26.6
	104.753	27.4		119.013	27.1		113.672	28.8		138.135	27.1		144.281	26.8		313.904	26.7
	104.257	27.5		118.228	27.2		113.455	28.9		137.56	27.2		144.107	26.9		314.6	26.8
	104.009	27.6		119.367	27.3		113.145	29		138.315	27.3		144.136	27		314.368	26.9
	103.905	27.7		118.601	27.4		113.979	29.1		138.008	27.4		143.77	27.1		314.421	27
	103.827	27.8		119.486	27.5		113.68	29.2		137.789	27.5		144.03	27.2		315.35	27.1
	104.588	27.9		118.623	27.6		113.576	29.3		137.979	27.6		144.318	27.3		314.69	27.2
	104.217	28		118.948	27.7		112.736	29.4		138.396	27.7		144.111	27.4		314.729	27.3
	104.007	28.1		118.814	27.8		112.857	29.5		137.967	27.8		144.299	27.5		314.496	27.4
	105.471	28.2		118.965	27.9		112.555	29.6		137.837	27.9		143.892	27.6		315.111	27.5
	105.091	28.3		119.915	28		112.164	29.7		137.743	28		143.701	27.7		315.998	27.6
	104.177	28.4		119.005	28.1		112.449	29.8		138.082	28.1		143.729	27.8		314.98	27.7
	104.701	28.5		118.032	28.2		112.505	29.9		137.848	28.2		144.29	27.9		315.287	27.8
	103.333	28.6		118.562	28.3		112.674	30		137.925	28.3		143.893	28		315.539	27.9
	104.434	28.7		119.223	28.4		111.753	30.1		137.757	28.4		144.101	28.1		315.302	28
	103.924	28.8		118.566	28.5		112.081	30.2		138.536	28.5		144.189	28.2		316.019	28.1
	104.255	28.9		118.838	28.6		112.729	30.3		137.442	28.6		144.461	28.3		314.815	28.2
	104.199	29		118.905	28.7		112.387	30.4		138.006	28.7		144.659	28.4		315.393	28.3
	103.815	29.1		118.548	28.8		111.879	30.5		138.38	28.8		144.468	28.5		315.355	28.4
	103.548	29.2		118.97	28.9		111.685	30.6		137.714	28.9		144.243	28.6		315.505	28.5
	104.303	29.3		118.811	29		112.442	30.7		137.297	29		143.914	28.7		315.389	28.6
	103.259	29.4		118.614	29.1		112.459	30.8		137.916	29.1		143.452	28.8		315.459	28.7
	103.481	29.5		118.278	29.2		111.963	30.9		137.638	29.2		143.924	28.9		315.126	28.8
	104.578	29.6		118.456	29.3		111.91	31		137.454	29.3		143.789	29		315.039	28.9
	104.733	29.7		119.006	29.4		111.564	31.1		138.183	29.4		144.054	29.1		315.581	29
	103.735	29.8		118.632	29.5		110.872	31.2		137.667	29.5		143.875	29.2		315.419	29.1
	104.491	29.9		118.262	29.6		110.928	31.3		138.756	29.6		143.193	29.3		315.841	29.2
	103.71	30		118.503	29.7		111.591	31.4		138.645	29.7		143.142	29.4		315.648	29.3
	103.964	30.1		118.338	29.8		111.169	31.5		139.153	29.8		143.348	29.5		315.273	29.4
	104.077	30.2		117.608	29.9		110.365	31.6		138.294	29.9		143.914	29.6		315.321	29.5
	104.611	30.3		118.682	30		111.458	31.7		137.958	30		143.752	29.7		316.159	29.6
	103.702	30.4		118.911	30.1		110.377	31.8		138.44	30.1		143.512	29.8		315.43	29.7
	103.722	30.5		118.27	30.2		110.791	31.9		138.217	30.2		144.502	29.9		314.936	29.8
	102.632	30.6		118.067	30.3		110.641	32		138.376	30.3		143.905	30		316.202	29.9
	103.675	30.7		119.103	30.4		110.641	32.1		138.525	30.4		143.198	30.1		315.578	30
	104.196	30.8		118.584	30.5		110.39	32.2		138.317	30.5		143.803	30.2		315.079	30.1
	104.063	30.9		118.58	30.6		110.727	32.3		138.554	30.6		143.504	30.3		315.656	30.2
	103.73	31		118.805	30.7		109.3	32.4		138.257	30.7		143.572	30.4		315.672	30.3
	104.547	31.1		119.203	30.8		110.466	32.5		138.162	30.8		143.693	30.5		314.545	30.4
	103.316	31.2		118.616	30.9		110.383	32.6		138.154	30.9		143.37	30.6		315.665	30.5
	104.761	31.3		118.797	31		110.028	32.7		138.561	31		143.305	30.7		315.777	30.6
	103.363	31.4		118.718	31.1		110.578	32.8		138.694	31.1		143.915	30.8		315.289	30.7
	103.739	31.5		118.567	31.2		110.409	32.9		138.953	31.2		143.581	30.9		315.368	30.8
	104.718	31.6		118.8	31.3		110.179	33		139.102	31.3		143.595	31		315.436	30.9
	104.017	31.7		118.07	31.4		109.939	33.1		138.972	31.4		143.189	31.1		315.095	31
	103.572	31.8		118.461	31.5		109.702	33.2		138.665	31.5		142.995	31.2		315.095	31.1
	103.96	31.9		118.679	31.6		110.291	33.3		139.423	31.6		143.431	31.3		316.096	31.2
	103.047	32		119.247	31.7		109.339	33.4		138.593	31.7		143.783	31.4		315.353	31.3
	103.899	32.1		118.689	31.8		110.36	33.5		138.329	31.8		143.74	31.5		315.62	31.4
	103.234	32.2		118.364	31.9		109.723	33.6		138.621	31.9		143.718	31.6		315.526	31.5
	104.157	32.3		118.253	32		109.479	33.7		139.199	32		143.388	31.7		315.117	31.6
	103.069	32.4		118.645	32.1		110.424	33.8		138.459	32.1		143.364	31.8		315.763	31.7
	103.578	32.5		118.257	32.2		109.316	33.9		138.378	32.2		143.433	31.9		315.668	31.8
	104.174	32.6		118.308	32.3		109.481	34		138.732	32.3		143.967	32		315.365	31.9
	103.279	32.7		118.332	32.4		109.297	34.1		138.289	32.4		142.717	32.1		314.863	32
	103.905	32.8		118.26	32.5		109.49	34.2		139.234	32.5		143.735	32.2		315.909	32.1
	105.187	32.9		118.571	32.6		109.121	34.3		138.853	32.6		143.101	32.3		314.997	32.2
	103.258	33		118.062	32.7		110.042	34.4		138.392	32.7		143.149	32.4		315.442	32.3
	103.844	33.1		118.031	32.8		109.167	34.5		138.903	32.8		143.431	32.5		315.407	32.4
	104.659	33.2		118.519	32.9		108.905	34.6		137.742	32.9		142.816	32.6		315.402	32.5
	104.161	33.3		118.189	33		108.949	34.7		138.001	33		143.501	32.7		315.387	32.6
	103.205	33.4		117.993	33.1		108.063	34.8		138.496	33.1		143.043	32.8		315.827	32.7
	102.944	33.5		117.449	33.2		109.54	34.9		139.186	33.2		143.358	32.9		316.182	32.8
	103.065	33.6		117.571	33.3		108.758	35		139.15	33.3		143.306	33		315.103	32.9
	103.942	33.7		118.185	33.4		109.111	35.1		139.264	33.4		142.571	33.1		315.294	33
	102.755	33.8		118.831	33.5		109.164	35.2		138.719	33.5		142.732	33.2		315.783	33.1
	102.598	33.9		118.869	33.6		109.171	35.3		139.116	33.6		143.017	33.3		315.801	33.2
	103.556	34		118.931	33.7		108.565	35.4		138.618	33.7		143.001	33.4		315.684	33.3
	103.846	34.1		118.038	33.8		108.746	35.5		138.998	33.8		143.027	33.5		315.448	33.4
	103.341	34.2		118.83	33.9		108.155	35.6		138.648	33.9		142.534	33.6		314.932	33.5
	103.239	34.3		118.386	34		108.522	35.7		138.868	34		142.468	33.7		314.593	33.6
	103.887	34.4		118.649	34.1		108.519	35.8		138.565	34.1		143.085	33.8		315.401	33.7
	103.207	34.5		118.59	34.2		109.295	35.9		138.315	34.2		142.597	33.9		315.488	33.8
	103.267	34.6		117.926	34.3		107.991	36		138.788	34.3		143.068	34		315.065	33.9
	103.421	34.7		118.034	34.4		108.608	36.1		138.698	34.4		142.889	34.1		315.278	34
	103.404	34.8		118.018	34.5		107.477	36.2		138.799	34.5		142.945	34.2		315.197	34.1
	103.472	34.9		118.074	34.6		107.931	36.3		138.208	34.6		142.492	34.3		315.115	34.2
	102.617	35		119.158	34.7		107.682	36.4		138.525	34.7		142.711	34.4		315.011	34.3
	103.66	35.1		118.531	34.8		107.792	36.5		138.64	34.8		142.2	34.5		315.089	34.4
	103.756	35.2		118.554	34.9		107.318	36.6		138.948	34.9		142.295	34.6		314.718	34.5
	103.061	35.3		118.567	35		108.098	36.7		138.535	35		142.636	34.7		315.269	34.6
	103.454	35.4		118.918	35.1		107.588	36.8		138.686	35.1		142.279	34.8		315.195	34.7
	103.139	35.5		117.724	35.2		106.758	36.9		139.511	35.2		142.267	34.9		315.456	34.8
	103.702	35.6		118.251	35.3		106.942	37		139.17	35.3		142.599	35		314.543	34.9
	103.648	35.7		118.322	35.4		107.144	37.1		138.805	35.4		142.39	35.1		314.521	35
	102.671	35.8		118.225	35.5		106.911	37.2		138.877	35.5		142.136	35.2		314.805	35.1
	103.582	35.9		118.836	35.6		107.344	37.3		138.228	35.6		142.44	35.3		315.875	35.2
	103.765	36		118.177	35.7		107.982	37.4		138.695	35.7		142.516	35.4		314.567	35.3
	103.946	36.1		118.186	35.8		107.23	37.5		139.066	35.8		141.921	35.5		315.067	35.4
	103.375	36.2		117.608	35.9		107.253	37.6		139.35	35.9		141.572	35.6		314.296	35.5
	103.382	36.3		118.313	36		107.381	37.7		138.58	36		142.411	35.7		314.984	35.6
	102.913	36.4		118.432	36.1		106.583	37.8		138.943	36.1		142.344	35.8		314.977	35.7
	104.028	36.5		118.702	36.2		107.262	37.9		138.764	36.2		141.694	35.9		314.883	35.8
	102.583	36.6		118.325	36.3		106.717	38		139.283	36.3		142.24	36		315.092	35.9
	102.71	36.7		118.583	36.4		106.731	38.1		138.779	36.4		142.274	36.1		314.773	36
	103.562	36.8		118.957	36.5		106.579	38.2		138.594	36.5		142.126	36.2		314.553	36.1
	102.864	36.9		118.1	36.6		106.319	38.3		138.77	36.6		142.348	36.3		314.76	36.2
	103.387	37		117.26	36.7		105.893	38.4		138.72	36.7		142.024	36.4		314.456	36.3
	104.159	37.1		117.949	36.8		106.758	38.5		138.855	36.8		141.96	36.5		314.992	36.4
	103.469	37.2		118.35	36.9		106.219	38.6		138.518	36.9		141.775	36.6		314.153	36.5
	103.628	37.3		117.946	37		105.505	38.7		138.25	37		141.281	36.7		314.491	36.6
	103.367	37.4		118.695	37.1		106.307	38.8		138.858	37.1		141.418	36.8		314.407	36.7
	103.594	37.5		117.91	37.2		106.357	38.9		139.05	37.2		141.021	36.9		315.31	36.8
	103.476	37.6		118.045	37.3		106.637	39		139.355	37.3		141.969	37		314.852	36.9
	103.341	37.7		118.158	37.4		105.913	39.1		138.5	37.4		141.588	37.1		315.158	37
	103.188	37.8		118.746	37.5		104.849	39.2		138.905	37.5		141.261	37.2		315.089	37.1
	103.058	37.9		118.009	37.6		106.505	39.3		138.414	37.6		141.559	37.3		314.647	37.2
	103.395	38		117.784	37.7		106.105	39.4		138.808	37.7		141.793	37.4		314.66	37.3
	103.073	38.1		117.965	37.8		105.936	39.5		138.815	37.8		142.049	37.5		314.433	37.4
	103.193	38.2		118.125	37.9		106.098	39.6		139.112	37.9		141.256	37.6		315.273	37.5
	103.323	38.3		118.283	38		105.469	39.7		138.076	38		141.54	37.7		314.468	37.6
	103.055	38.4		117.848	38.1		105.203	39.8		138.711	38.1		141.84	37.8		313.722	37.7
	103.015	38.5		118.062	38.2		105.36	39.9		138.889	38.2		140.974	37.9		313.918	37.8
	102.295	38.6		118.076	38.3		105.475	40		139.253	38.3		140.731	38		313.872	37.9
	104.094	38.7		118.388	38.4		105.737	40.1		138.887	38.4		141.337	38.1		314.228	38
	104.438	38.8		118.311	38.5		104.727	40.2		139.393	38.5		141.171	38.2		313.973	38.1
	103.246	38.9		118.301	38.6		104.606	40.3		139.282	38.6		140.45	38.3		314.65	38.2
	103.113	39		118.438	38.7		105.543	40.4		138.537	38.7		141.058	38.4		314.299	38.3
	103.767	39.1		118.465	38.8		105.1	40.5		139.18	38.8		141.204	38.5		314.42	38.4
	103.392	39.2		118.954	38.9		104.832	40.6		138.941	38.9		140.984	38.6		314.25	38.5
	102.967	39.3		117.873	39		104.47	40.7		138.4	39		141.252	38.7		314.277	38.6
	102.819	39.4		117.209	39.1		104.565	40.8		138.785	39.1		141.319	38.8		314.034	38.7
	103.347	39.5		118.349	39.2		104.462	40.9		139.101	39.2		141.263	38.9		314.321	38.8
	103.116	39.6		118.321	39.3		104.254	41		138.837	39.3		141.344	39		313.919	38.9
	102.887	39.7		118.244	39.4		104.683	41.1		139.162	39.4		140.631	39.1		314.22	39
	102.486	39.8		118.073	39.5		104.82	41.2		138.184	39.5		140.94	39.2		313.99	39.1
	102.674	39.9		117.837	39.6		105.061	41.3		138.529	39.6		141.028	39.3		313.882	39.2
	103.351	40		118.775	39.7		103.873	41.4		139.358	39.7		140.924	39.4		314.154	39.3
				118.249	39.8		104.74	41.5		139.215	39.8		140.609	39.5		313.664	39.4
				119.359	39.9		104.623	41.6		138.818	39.9		140.892	39.6		313.627	39.5
				118.457	40		104.783	41.7		140.058	40		140.368	39.7		313.264	39.6
				117.465	40.1		103.365	41.8		139.468	40.1		140.769	39.8		314.372	39.7
				118.512	40.2		103.87	41.9		139.114	40.2		140.621	39.9		313.487	39.8
				118.842	40.3		103.802	42		139.63	40.3		140.567	40		314.087	39.9
				117.804	40.4		103.979	42.1		138.782	40.4		140.734	40.1		313.895	40
				118.613	40.5		103.555	42.2		139.881	40.5		141.401	40.2		313.305	40.1
				118.282	40.6		103.528	42.3		138.961	40.6		140.819	40.3		313.142	40.2
				118.225	40.7		103.948	42.4		138.941	40.7		140.825	40.4		313.647	40.3
				117.471	40.8		103.225	42.5		138.409	40.8		140.373	40.5		313.101	40.4
				117.925	40.9		103.989	42.6		138.612	40.9		140.309	40.6		313.417	40.5
				118.181	41		103.882	42.7		139.712	41		140.039	40.7		313.385	40.6
							103.357	42.8		139.551	41.1		140.665	40.8		313.695	40.7
							104.045	42.9		139.172	41.2		140.583	40.9		313.23	40.8
							103.266	43		139.201	41.3		140.37	41		313.516	40.9
							102.697	43.1		138.638	41.4		141.159	41.1		313.305	41
							103.998	43.2		139.185	41.5		140.259	41.2		312.901	41.1
										138.749	41.6		140.437	41.3		312.171	41.2
													139.868	41.4		313.09	41.3
													140.532	41.5		313.143	41.4
													140.487	41.6		313.202	41.5
													139.834	41.7		312.846	41.6
													140.566	41.8		313.121	41.7
													140.339	41.9		312.734	41.8
													140.018	42		312.916	41.9
													140.625	42.1		312.567	42
													140.332	42.2		312.595	42.1
													140.422	42.3		313.367	42.2
													139.668	42.4		312.148	42.3
													140.238	42.5		312.319	42.4
													139.915	42.6		312.731	42.5
													139.61	42.7		312.481	42.6
													139.946	42.8		312.111	42.7
													140.145	42.9		312.431	42.8
													139.798	43		312.626	42.9
													139.889	43.1		312.1	43
													140.118	43.2		312.759	43.1
													139.655	43.3		312.217	43.2
													139.833	43.4		312.043	43.3
													140.092	43.5		312.077	43.4
													139.819	43.6		312.595	43.5
													139.701	43.7		312.535	43.6
													139.541	43.8		311.414	43.7
													140.074	43.9		312.357	43.8
													139.79	44		311.791	43.9
													139.803	44.1		311.859	44
													139.975	44.2		311.914	44.1
													140.386	44.3		311.986	44.2
													139.694	44.4		312.504	44.3
													138.88	44.5		311.733	44.4
													139.716	44.6		312.434	44.5
													139.601	44.7		311.24	44.6
													139.625	44.8		311.69	44.7
																311.593	44.8
																311.62	44.9
																311.541	45
																311.318	45.1
																311.466	45.2
																311.537	45.3
																310.812	45.4
																311.577	45.5
																311.931	45.6
																311.47	45.7
																311.08	45.8
																311.124	45.9
																310.489	46
																311.334	46.1
																311.244	46.2
																310.812	46.3
																311.111	46.4
																310.657	46.5
																310.92	46.6
																310.641	46.7
																311.027	46.8
																310.735	46.9
																310.625	47
																311.02	47.1
																310.088	47.2
																311.091	47.3
																309.812	47.4
																310.228	47.5
																310.075	47.6
																311.045	47.7
																311.101	47.8
																310.406	47.9
																310.755	48
																310.277	48.1
																309.793	48.2
																309.989	48.3
																309.311	48.4
																310.468	48.5
																309.762	48.6
																309.353	48.7
																309.874	48.8
																309.493	48.9
