# Supplementary material for: A mechano-osmotic feedback couples cell volume to the rate of cell deformation
Source: eLife journal article supplement (doi:10.7554/elife.72381), 2022-04-13
Supplement: supp [file examples.xlsx]

## Sheet: Sheet1
date	20181126			20181126			20181126			20181218			20181218			20181218
P/Piso	1.10611			1.4332			2			0.867347			0.823666			0.603478
t (min)		V (%)			V (%)			V (%)			V (%)			V (%)			V (%)
0		100			100			100			100			100			100
0.5		98.0778			99.5496			100.265			99.796			100.68			100.04
1		99.7389			99.41			100.37			99.5345			99.8628			99.6492
1.5		100.003			99.2768			100.865			99.3696			99.5976			99.3234
2		98.6978			99.715			101.346			99.1289			99.2986			99.2527
2.5		98.4845			99.3658			101.89			98.8674			99.8149			99.1467
3		97.7335			99.4256			100.974			99.177			100.865			99.3106
3.5		99.158			98.6757			101.208			99.422			100.589			99.8029
4		98.4652			99.312			101.741			99.1101			100.848			99.9481
4.5		98.6629			99.3977			102.933			99.0651			100.974			99.7477
5		108.905			125.589			165.701			89.8599			84.02			75.9812
5.5		108.211			122.697			161.534			90.0301			84.5746			76.1852
6		106.433			117.514			153.703			90.8277			87.3019			76.7316
6.5		104.002			114.466			151.124			91.4288			87.1649			77.6107
7		103.077			112.041			149.002			92.0971			88.0001			78.9395
7.5		102.365			111.726			145.348			92.7045			89.8737			79.2288
8		101.292			111.019			142.497			92.9902			90.0304			80.1968
8.5		100.06			110.643			137.834			93.5188			91.0635			81.4735
9		100.384			110.138			136.17			93.8837			90.9199			81.5073
9.5		98.9988			109.799			132.479			94.6771			92.2643			82.782
10		99.5093			109.049			130.626			94.3786			92.4228			83.7551
10.5		98.9911			109.52			128.004			94.8937			93.0044			84.4944
11		99.1006			108.963			126.691			95.1666			94.6994			85.254
11.5		97.9179			108.985			125.383			95.7043			94.1638			86.0098
12		98.2436			108.945			124.555			96.1307			95.6155			85.8146
12.5		97.6679			109.025			123.474			96.6826			96.4145			87.0684
13		97.7182			108.673			121.436			96.7926			97.6068			88.0723
13.5		97.0987			109.284			120.861			96.7239			97.6072			88.4561
14		97.6784			108.417			119.924			97.6022			98.3125			88.7487
14.5		96.8071			108.647			119.26			97.8149			98.4447			90.1276
15		97.5775			107.597			119.531			98.4333			100.18			90.5613
15.5		96.717			108.269			120.003			98.7013			99.0725			90.5729
16		96.932			108.115			120.281			99.1059			99.5628			91.7646
16.5		96.0521			107.94			118.98			99.301			99.2724			92.3988
17		96.6723			107.991			119.524			99.362			99.9601			92.6044
17.5		96.6833			107.805			119.118			99.6291			99.6067			93.0828
18		96.4059			107.565			118.965			99.7325			101.47			93.4162
18.5		97.2299			108.204			119.68			99.7998			100.414			94.0607
19		96.8567			108.078			118.185			100.321			101.958			94.418
19.5		96.8146			107.728			118.104			100.001			102.273			94.7581
20		97.4387			107.785			117.745			100.515			102.698			94.7502
20.5		96.6728			108.119			119.24			100.465			103.079			95.7568
21		96.5372			109.296			119.233			100.614			101.744			95.8866
21.5		96.7004			107.961			119.596			100.711			101.885			96.849
22		98.7579			108.118			118.841			100.865			101.527			96.7231
22.5		96.5444			108.227			119.762			100.882			101.122			96.8279
23		96.9047			108.283			119.621			101.129			101.614			97.982
23.5		99.2265			108.51			119.698			101.73			102.416			97.9603
24		97.7728			107.9			118.645			101.187			103.313			97.8424
24.5		97.1143			107.793			119.752			101.711			103.347			98.5894
25		98.126			108.055			118.932			102.105			103.689			98.8059
25.5		98.6103			108.376			119.455			101.316			104.143			99.1281
26		96.7185			109.485			118.402			101.825			103.071			99.2574
26.5		98.4368			109.476			118.845			101.95			101.622			99.6793
27		99.8467			108.617			118.415			101.756			102.733			99.5299
27.5		99.1424			109.168			118.776			101.776			103.612			99.9143
28		98.3639			108.618			118.153			102.036			102.265			99.5812
28.5		98.6434			108.774			119.268			101.919			102.531			100.174
29		97.5431			108.65			119.125			102.066			102.611			100.699
29.5		98.0444			109.34			120.075			101.902			103.549			100.747
30		98.1435			109.687			119.299			102.17			103.363			101.613
30.5		97.1864			109.831			120.532			102.115			101.918			101.488
31		98.1947			109.274			120.142			101.81			103.021			101.28
31.5		96.7562			109.743			119.747			102.171			103.039			102.066
32		98.0436			109.58			121.909			101.962			101.92			102.284
32.5		98.138			109.576			119.668			102.324			102.441			102.532
33		97.046			110.064			121.008			101.952			103.421			102.874
33.5		97.2583			109.396			119.685			102.384			103.561			102.679
34		97.9709			110.074			120.998			103.123			102.92			103.432
34.5		96.5374			108.72			120.82			103.093			102.542			103.725
35		97.2584			109.815			122.471			103.288			102.384			103.608
35.5		97.2678			109.934			121.02			102.55			103.743			103.72
36		96.825			110.474			121.233			102.469			103.118			104.032
36.5		98.8752			109.856			121.145			102.666			103.364			104.285
37		98.5339			109.977			121.154			102.358			104.267			104.507
37.5		97.0118			110.126			122.1			102.928			103.556			105.464
38		97.8766			109.833			121.809			102.904			102.348			105.583
38.5		97.5195			110.912			122.94			103.524			103.12			105.898
39		98.0828			110.315			122.88			103.33			103.309			106.074
39.5		99.2491			109.989			123.538			103.486			103.712			105.706
40		98.5792			110.884			124.583			103.437			103.321			106.027
40.5		98.7283			110.619			123.965			103.526			103.972			106.104
41		98.2273			111.195			123.635			103.924			105.026			106.885
41.5		98.5829			112.024			125.465			103.694			103.74			106.992
42		100.038			111.381			124.937			103.862			105.112			106.892
42.5		99.1324			110.976			124.933			103.81			103.613			107.455
43		98.9914			112.031			126.066			104.49			104.42			107.219
43.5		98.9246			111.665			126.276			103.832			102.567			106.988
44		100.056			111.359			126.549			104.184			103.921			107.399
44.5		98.163			111.685			126.284			104.317			104.068			107.691
45		99.0175			111.077			127.644			104.643			102.977			108.219
45.5		100.05			112.494			126.417			104.338			102.812			108.272
46		100.4			111.892			126.737			104.689			103.984			108.557
46.5		100.073			112.154			126.544			104.533			102.948			108.924
47		100.156			111.381			126.883			104.874			103.254			108.992
47.5		99.8314			112.793			126.442			104.967			103.681			109.659
48		100.362			112.313			127.278			105.092			103.054			109.684
48.5		100.728			112.298			127.919			105.307			103.073			109.786
49		99.7316			111.962			126.336			105.32			103.642			109.989
49.5		99.4517			111.126			127.749			105.118			104.604			110.17
50		99.5003			111.876			127.924			105.402			103.319			110.05
50.5		101.018			111.287			128.835			105.88			103.975			110.334
51		100.491			112.101			128.681			105.921			104.497			110.48
51.5		100.445			112.468			129.339			105.633			104.516			110.854
52		100.553			111.807			129.172			106.29			105.432			110.304
52.5		100.897			112.378			129.297			106.4			104.953			111.316
53		100.297			112.779			129.689			107.146			104.546			111.077
53.5		100.029			111.856			129.001			106.264			104.775			111.359
54		99.959			112.931			129.648			107.133			105.493			111.348
54.5		100.772			112.114			130.613			107.235			104.625			111.019
55		100.089			112.635			130.699			107.37			104.797			110.828
55.5		101.766			112.08			131.491			107.757			104.439			111.443
56		101.171			112.053			130.667			107.823			104.578			111.503
56.5		102.505			112.94			131.953			108.123			104.961			112.413
57		100.9			112.642			132.008			107.944			104.725			111.857
57.5		101.54			111.94			133.282			108.666			104.753			111.891
58		101.395			113.059			134.184			108.247			104.914			112.018
58.5		103.648			112.614			133.412			108.614			105.411			112.846
59		103.738			112.68			132.817			109.174			104.428			112.702
59.5		105.408			112.351			133.254			108.572			104.924			112.958
60		107.404			112.8			133.293			109.219			104.762			112.721
