# Supplementary material for: A mechano-osmotic feedback couples cell volume to the rate of cell deformation
Source: eLife journal article supplement (doi:10.7554/elife.72381), 2022-04-13
Supplement: supp [file examples.xlsx]

## Sheet: Sheet1
t (min)		3	5	1	2	4				3	5	1	2	4
		V (%)	V (%)	V (%)	V (%)	V (%)				A (µm2)	A (µm2)	A (µm2)	A (µm2)	A (µm2)
0		100	100	100	100	100				33.074	29.2258	16.329	23.089	26.21
1		98.9136	98.3471	99.6574	97.3195	99.1374						15.4969	58.035	42.123
2		98.8143	97.8135	99.764	94.4472	99.3934							63.548	65.524
3		97.8092	96.7976	101.154	91.6114	99.3113					64.8999	20.1772	89.133	57.307
4		97.325	95.9936	101.018	88.1879	98.7451				46.8028			88.717	66.98
5		97.1649	95.146	100.765	86.2723	99.1394							122.623	72.284
6		96.522	94.6839	100.276	84.0688	98.7306				74.8845		37.5463	164.538
7		96.5363	93.7519	100.792	82.8921	98.4065					123.351		175.667
8		97.0558	93.7798	100.669	82.2115	99.041
9		96.4062	93.1525	100.917	80.8181	97.909				105.046			205.204	69.164
10		96.7103	92.3588	100.908	79.644	97.7874							253.359	64.9
11		96.0102	91.9449	101.35	78.3892	98.2699					172.858	87.4693		80.917
12		96.0047	91.8158	101.37	77.5149	98.3897				179.411			253.255
13		95.032	91.0843	101.779	76.569	98.3899
14		95.5671	91.0775	101.76	76.9431	98.3949							270.416	70.516
15		95.0045	90.4635	101.767	76.4134	98.9114				266.568				79.461
16		95.4389	90.0867	101.331	76.0737	98.4439					195.636	103.07	293.506
17		95.0809	89.9206	101.79	75.554	98.5612								71.14
18		94.3454	89.4639	102.06	75.5971	98.3476				305.05			344.989
19		93.4908	88.8827	102.492	75.3117	98.0219							328.764
20		93.1372	88.2507	102.563	75.3769	99.0989						139.264	313.891	80.085
21		93.0408	88.6003	102.659	75.849	100.301				331.988				72.076
22		93.1165	88.7321	102.678	75.7181	99.78							330.428
23		92.3643	88.7984	102.352	75.8873	100.778
24		92.4404	88.5185	102.049	75.8244	100.744				395.952		161.002	337.916	76.965
25		92.0489	88.8897	101.27	76.047	100.359					266.36			65.42
26		91.3865	88.0935	102.469	76.1581	100.706							341.765	65.628
27		90.8945	87.5372	102.619	76.8109	101.057				402.192
28		90.6174	87.6043	103.179	77.3639	100.444							352.685	68.436
29		90.637	87.3684	103.006	77.2927	99.9211						184.923
30		91.0693	87.1213	104.221	77.2856	101.124							387.111	77.797
31		90.6453	87.2031	104.366	77.94	101.382				442.235	303.178
32		90.3873	87.1885	103.903	78.5552	101.606						194.596	348.941
33		90.2661	87.0116	104.276	78.6896	101.947								60.428
34		90.3605	87.0731	103.877	79.1097	102.754				427.258			349.149	58.66
35		90.5149	87.1338	104.144	79.4381	103.022
36		90.4836	86.8061	103.533	80.0232	102.017							346.653	61.052
37		90.3941	86.9392	103.539	80.2529	102.722						229.854
38		89.998	86.371	102.493	81.1888	102.409							342.701	58.66
39		90.5696	86.4478	103.182	80.923	103.158				454.299	326.892
40		90.6634	86.4064	102.744	81.2456	102.537						214.877	352.165	65.732
41		90.5221	86.118	103.535	81.3675	102.247
42		90.7677	86.3192	101.972	81.9685	103.097							346.133	69.268
43		90.7551	86.3441	103.132	82.8552	103.64
44		91.1206	86.28	103.637	83.5345	103.771				500.582	380.871		360.798	61.572
45		90.8543	86.4297	103.16	83.2156	103.714						259.912		71.244
46		91.0883	86.4929	103.033	83.8472	103.817							350.397
47		91.6449	86.2942	102.968	84.0161	103.87								68.228
48		91.7548	86.2576	102.609	84.9127	104.16							373.798	74.26
49		92.0457	86.3165	103.433	84.9819	104.095
50		92.2853	86.4366	102.997	85.9551	103.986				480.093	446.083	287.161	336.98	81.853
