# Supplementary material for: A mechano-osmotic feedback couples cell volume to the rate of cell deformation
Source: eLife journal article supplement (doi:10.7554/elife.72381), 2022-04-13
Supplement: supp [file fit_std_vol_migration.xlsx]

## Sheet: std_vol_migration
velocity(um/min)	std_vol
0	0.01
0.1	0.0178766
0.2	0.0250552
0.3	0.0311097
0.4	0.0359472
0.5	0.039694
0.6	0.0425583
0.7	0.0447455
0.8	0.0464258
0.9	0.0477295
1	0.0487529
1.1	0.049566
1.2	0.05022
1.3	0.050752
1.4	0.0511895
1.5	0.0515528
1.6	0.0518575
1.7	0.0521152
1.8	0.0523348
1.9	0.0525233
2	0.0526863
2.1	0.0528281
2.2	0.0529522
2.3	0.0530613
2.4	0.0531577
2.5	0.0532434
2.6	0.0533197
2.7	0.0533881
2.8	0.0534496
2.9	0.0535051
3	0.0535552
3.1	0.0536008
3.2	0.0536423
3.3	0.0536801
3.4	0.0537148
3.5	0.0537466
