# Supplementary material for: A mechano-osmotic feedback couples cell volume to the rate of cell deformation
Source: eLife journal article supplement (doi:10.7554/elife.72381), 2022-04-13
Supplement: supp [file Fitparameters.xlsx]

## Sheet: With contact area drugs
Cells treated with different drugs. The tension is a function of contact area
With growth rate of 5% and taking the spread area at time zero to be given the first element of the spread area timeseries
Condition	A0(µm2)	𝜏a(min.)	𝜏 (min.)	𝜉	𝜉 (normalized)	A0(normalized)	𝜉/A0 (normalized)	dV/dt = 𝜉 /𝜏a (conition /control)	dA/dt = A0/𝜏a	dV/dA
Control	479.386	25.944	53.4723	0.164428	1	1	1
Y-27	832.982	24.3607	16.3748	0.667452	4.05924	1.7376	2.33611
EIPA	549.017	33.6644	30.7495	0.176089	1.07092	1.14525	0.935096
Lat	1522.37	212.049	13.7924	0.882083	5.36456	3.17568	1.68926
GdCl3	627.833	18.2652	171.234	0.16698	1.01552	1.30966	0.775409
CK-666	285.368	14.874	689144476659362	0.0887063	0.539484	0.595278	0.906272
CK-666+Y-27	738.179	25.5927	35.9583	0.104648	0.63644	1.53984	0.413314
EIAP+Y-27	1035.06	29.0419	608242906205678	0.0166259	0.101114	2.15913	0.0468308
With growth rate of 5% and taking the spread area at time zero to be zero
Condition	A0(µm2)	𝜏a(min.)	𝜏 (min.)	𝜉	𝜉 (normalized)	A0(normalized)	𝜉/A0 (normalized)	dV/dt = 𝜉 /𝜏a (conition /control)	dA/dt = A0/𝜏a	dV/dA	Comment
Control	451.803	21.2377	73.0334	0.130123	1	1	1	1	1	1
Y-27	807.349	21.8139	18.3847	0.569239	4.37462	1.78695	2.4481	4.25907	1.73975	2.4481	increase in k or alpha
EIPA	471.635	22.1958	49.7489	0.110155	0.846545	1.0439	0.810948	0.810003	0.998835	0.810948	decrease in k or alpha
Lat	520.035	45.9599	28.8468	0.165384	1.27098	1.15102	1.10422	0.587311	0.531878	1.10422
GdCl3	605.774	15.3227	417.817	0.136417	1.04837	1.34079	0.781903	1.45307	1.85838	0.781903
CK-666	276.172	12.0679	2.4*10^15	0.076251	0.585992	0.611266	0.958652	1.03126	1.07574	0.958652
CK-666+Y-27	681	18.8	53.1	0.0719352	0.552825	1.50729	0.366766	0.624507	1.70274	0.366766	decrease in k or alpha
EIAP+Y-27	991.487	25.7307	4.1*10^14	0.015132	0.11629	2.19451	0.0529913	0.0959838	1.81131	0.0529913
With growth rate of 0% and taking the spread area at time zero to be zero
Condition	A0(µm2)	𝜏a(min.)	𝜏 (min.)	𝜉
Control	451.803	21.2377	27.812	0.123388
Y-27	807.349	21.8139	13.5347	0.621395
EIPA	471.635	22.1958	14.6751	0.115466
Lat	520.035	45.9599	6.34109	0.221752
GdCl3	605.774	15.3227	87.5989	0.125794
CK-666	276.172	12.0679	80.1157	0.0602305
CK-666+Y-27	702.655	21.1984	8.94061	0.049633
EIAP+GdCl3	991.487	25.7307	-4.3*10^-7	0.084851

## Sheet: With total area drugs
Cells treated with different drugs. The tension is a function of total area (taking the shape to be a spherical cap)
Condition	A0(µm2)	𝜏a (min.)	𝜏 (min.)	𝜉	Comment
Control	479.386	25.944	12	1
Y-27	832.982	24.3607	8.5	1.3	increas in alpha, decreae in elaticity
EIPA	549.017	33.6644	8.5	0.8	decreae in alpha, no need to change elaticity
Lat	1522.37	212.049	2	3.4	cant trust the fit
GdCl3	627.833	18.2652	34.5	0.4	decreaes in alpha, decrease in elaticity
CK-666	285.368	14.874	29.5	0.9	almost no change, slight decrease in elaticity
CK-666+Y-27	738.179	25.5927	18	0.2	decrease in alpha, decreaes in elaticity
EIAP+Y-27	1035.06	29.0419	4.5	0.1	decreae in alpha, decrease in elaticity

## Sheet: With contact area Grouped contr
Control cells grouped in three groups based on their spreading speed. The tension is a function of contact area
With growth rate of 5% and taking the spread area at time zero to be given the first element of the spread area timeseries
Condition	A0(µm2)	𝜏a(min.)	𝜏 (min.)	𝜉	𝜉/A0 (normalized)	dV/dt (normalized)	dA/dt (normalized)	A0 (normalized)	𝜉(normalized)
Slow	619.6	63.3	98.5	0.21
Fast	487.9	25.6	64.2	0.16
Fastest	656.1	17.2	99.4	0.16
With growth rate of 5% and taking the spread area at time zero to be zero
Condition	A0(µm2)	𝜏a(min.)	𝜏 (min.)	𝜉	𝜉/A0 (normalized)	dV/dt (normalized)	dA/dt (normalized)	A0 (normalized)	𝜉(normalized)
Slow	487.9	40.5	280.1	0.13	0.94999	0.530864	0.55881	1.05264	1
Fast	463.5	21.5	87.3	0.13	1	1	1	1	1
Fastest	642.6	15.4	130.6	0.14	0.776772	1.5035	1.93557	1.38641	1.07692
With growth rate of 0% and taking the spread area at time zero to be zero
Condition	A0(µm2)	𝜏a(min.)	𝜏 (min.)	𝜉
Slow	487.936	40.458	61.758	0.100741
Fast	463.536	21.501	34.7994	0.121671
Fastest	642.579	15.3712	50.1528	0.13139

## Sheet: With total area Grouped control
Control cells grouped in three groups based on their spreading speed. The tension is a function of total cell area (using a spherical cap approximation)
Condition	A0(µm2)	𝜏a(min.)	𝜏 (min.)	𝜉	𝜉 (normalized)
Slow	619.6	63.3	5	2.5	2.8
Fast	487.9	25.6	13	0.9	1
Fastest	656.1	17.2	51	0.5	0.5
