# Supplementary material for: A mechano-osmotic feedback couples cell volume to the rate of cell deformation
Source: eLife journal article supplement (doi:10.7554/elife.72381), 2022-04-13
Supplement: supp [file FN_single_cells.xlsx]

## Sheet: V
dV/dt (µm3/min)	-1.9979	-15.4534	-2.20672	-0.151027	-6.40884		3.99286	-4.22098	-16.1216		-6.45555	-1.83497	-12.0141	-15.4464	-8.04897	0.672366	-1.08594	-17.4232	0.425905	-10.0591	-2.30904	-11.7844		-6.10587	-11.6351	-1.93821	-4.60061	-19.009	-0.843784	-1.23661	-23.0352	-16.8356	-0.815073	-3.15748	-24.2082	2.85822	-4.42119	11.4382	5.9357	7.5775	0.104426	-3.65751	-9.2083			-8.92505	-3.12498	-3.36789	-1.1543
position	4	4	4	4	4	4	4	4	4	4	5	5	5	5	5	5	5	5	5	5	5	5	6	6	6	6	6	6	6	6	6	6	6	6	7	7	7	7	7	7	7	7	7	7	8	8	8	8	8
time (min) / cell	1	2	3	4	5	6	7	8	9	12	1	2	4	5	7	6	8	9	10	11	12	13	1	2	3	4	5	6	7	8	9	10	11	12	1	2	5	6	7	11	12	13	14	15	1	2	3	4	5
0	1946.43	2165.8	2523.85	1671.55	2008.32		2242.96	1465.72	1489.46		1527.44	1390.41	2287.87	2034.93	2626.51	1867.27	1218.55	1594.03	2323.11	1525.04	1602.04	2074.81		2518.59	1982.7	1516.06	1147.19	2071.09	1159.62	1490.27	3195.67	2197.61	1664.82	1481.93	2172.12	1050.86	2455.18	1866.26	2231.74	2143.7	1224.12	1204.48	1936.07			1555.87	1903.85	1319.18	2211.88
1	1934.36	2130.01	2522.29	1675.61	1986.5		2219.49	1446.74	1480.18		1516.88	1367.02	2246.21	2009.51	2599.08	1855.57	1205.59	1558.85	2309.96	1516.16	1595.06	2070.49		2516.03	1971.65	1516.34	1151.92	2034.34	1157.76	1490.88	3151.88	2187.05	1664.52	1487.38	2145.91	1041.94	2424.69	1873.32	2226	2155.32	1220.73	1195.26	1926.89			1553.84	1898.59	1317.28	2217.82
2	1920.62	2118.45	2525.58	1672.09	1984.5		2215.8	1433.6	1466.1		1504.55	1385.49	2225.77	1996.88	2591.54	1851.02	1214.5	1527.19	2302.34	1492.13	1604.13	2047.9		2528	1946.01	1508.7	1157.59	1999.68	1145.76	1480.46	3102.83	2153.97	1656.98	1488.96	2121.28	1053.46	2417.29	1895.63	2241.53	2163.77	1231.1	1195.41	1915.64			1544.81	1893.41	1319.78	2217.98
3	1911.93	2096.45	2522.41	1672.5	1964.32		2224.28	1422.76	1446.84		1519.95	1380.11	2200.28	1983.49	2585.75	1850.71	1219.27	1504.27	2300.71	1475.5	1597.1	2030.13		2526.08	1936.81	1511.23	1148.33	1969.94	1148.27	1474.58	3073	2134.27	1666.63	1502.57	2076.07	1055.45	2394.82	1906.8	2244.34	2178.18	1237.1	1175.81	1883.84			1528.97	1893.31	1312.65	2210.86
4	1935	2079.03	2517.75	1678.88	1954.59		2217.99	1420.16	1441.77		1508.53	1373.13	2167.14	1959.32	2564.56	1856.62	1201.99	1471.42	2302.29	1467.54	1591.67	2015.9		2521.6	1926.57	1506.89	1148.53	1957.53	1154.87	1479.1	3053.31	2102.81	1652.21	1489.81	2052.31	1057.38	2404.5	1919.21	2264.63	2171.03	1227.65	1176.36	1879.67			1522.12	1888.36	1309.38	2223.13
5	1909.1	2060.68	2514.14	1672.56	1951.38		2213.78	1417.33	1420.55		1501.44	1375.01	2166.21	1942.56	2571.95	1852.41	1210.53	1461.68	2300.03	1456.02	1598.27	2009.1		2509.56	1914.3	1507.1	1142.24	1935.93	1141.48	1482.87	3034.92	2091.35	1647.42	1494.18	2026.02	1063.4	2383.25	1940.86	2278.5	2182.07	1230.09	1180.38	1871.72			1501.59	1888.25	1311.95	2225.09
6	1913.98	2050.67	2508.03	1675.84	1938.47		2196.57	1415.64	1406.06		1485.73	1367.87	2155.28	1926.65	2555.12	1856.17	1207.47	1446.4	2299.56	1457.77	1592.82	1992.11		2506.95	1891.25	1505.48	1131.05	1922.19	1150.55	1479.48	3008.71	2076.77	1663.54	1486.07	2007.75	1074.97	2397.44	1947.5	2272.39	2187.85	1229.72	1177.79	1865.19			1498.95	1886.54	1303.82	2217.02
7	1919.42	2030.48	2508.37	1665.18	1938.75		2256.95	1416.6	1382.73		1477.39	1370.96	2155.72	1915.69	2550.05	1852.08	1210.68	1430.99	2312.68	1436.22	1588.13	1987.98		2490.66	1894.17	1500.6	1137.6	1902.87	1155.36	1480.95	3002.04	2058.71	1659.72	1481.09	1974.52	1066.07	2402.27	1946.42	2276.13	2195.26	1232.48	1171.98	1865.77			1489.55	1883.47	1300.48	2222.23
8	1923.88	2031.09	2514.88	1671.82	1949.19		2283.09	1416.51	1360.56		1471.06	1367.95	2152.82	1901.87	2551.12	1863.04	1213.29	1425.86	2307.84	1438.81	1583.77	1980.83		2488.38	1874.12	1495.64	1122.26	1891.85	1135.57	1480.61	2980.58	2056.66	1659.59	1477.26	1970.37	1071.43	2407.41	1965.68	2280.75	2208.67	1229.23	1171.64	1854.65			1482.05	1870.84	1300.17	2209.08
9	1914.33	2017.5	2505.53	1672.23	1936.14		2251.28	1414.98	1344.09		1476.36	1367.19	2153.55	1890.72	2536.96	1864.76	1202.89	1422.47	2313.15	1427.15	1582.81	1970.51		2470.04	1876.94	1498.73	1120.4	1877.78	1148.53	1473.27	2966.6	2041.26	1660.13	1458.85	1950.45	1067.95	2392.76	1960.69	2280.06	2219.06	1222.16	1161.62	1851.9			1476.62	1870.93	1292.36	2204.05
10	1917.75	2000.31	2502.69	1674.63	1942.25		2256.2	1411.88	1339.77		1459.52	1365.14	2161.67	1880.8	2539.54	1867.04	1199.89	1414.93	2322.39	1424.61	1576.61	1957.4		2461.92	1869.76	1499.87	1100.18	1876.74	1152.59	1474.44	2947.77	2037.68	1649.33	1451.64	1935.98	1074.38	2387.82	1984.47	2281.28	2222.28	1227.83	1166.45	1840.2			1479.36	1875.07	1282.78	2199.52
11	1912.46	1991.35	2520.1	1665.49	1928.19		2278.56	1419.46	1335.68		1459.16	1360.92	2147.58	1849.2	2533.24	1880.76	1210.66	1401.53	2316.78	1425.64	1584.14	1952.72		2439.89	1870.22	1495.26	1099.9	1869.12	1147.58	1467.01	2946.11	2024.17	1647.34	1464.94	1927.58	1082.58	2388.93	1993.02	2288.42	2228.16	1217.85	1165.62	1825.78			1472.95	1868.39	1278.31	2185.1
12	1917.92	1988.55	2515.32	1658.42	1928.08		2253.52	1423.26	1332.51		1454.75	1363.36	2152.21	1837.94	2538.63	1876.1	1208.52	1399.81	2315.96	1426.01	1579.44	1938.98		2438.69	1860.54	1491.08	1090.97	1876.32	1140.25	1479.84	2960.55	2051.3	1654.17	1452.64	1927.19	1088.91	2386.88	1995.02	2253.35	2232.57	1208.98	1161.1	1817.84			1475.81	1871.27	1275.85	2192.02
13	1905.41	1972.71	2517.27	1666	1908.54		2274.68	1420.38	1321.54		1437.39	1356.98	2149.52	1829.42	2542.09	1873.5	1200.83	1392.75	2309.02	1425.45	1564.89	1916.84		2434.39	1863.49	1490.34	1092.12	1869.92	1140.25	1478.69	2947.83	2015.73	1645.52	1441.1	1907.17	1081.39	2393.93	2005.41	2251.15	2255.23	1201.37	1156.63	1826.87			1462.23	1870.88	1267.8	2173.93
14	1904.62	1972.56	2521.03	1670.9	1919.29		2267.07	1417.13	1319.36		1433.76	1348.53	2143.65	1835.16	2532.9	1875.99	1215.66	1366.47	2318.18	1422.41	1563.51	1907.51		2429.9	1862.54	1490.1	1085.6	1865.01	1152.16	1487.94	2938.95	2019.31	1638.75	1443.88	1912.05	1087.09	2381.88	2003.14	2232.99	2264.19	1187.77	1150.86	1820.53			1459.93	1869.93	1256.06	2175.99
15	1897.54	1959.26	2527.6	1656.08	1907.99		2263.93	1424.93	1333.28		1431.39	1343.66	2140.65	1826.04	2529.07	1882.96	1217.12	1365.31	2329.88	1421.64	1557.63	1898.77		2419.55	1839.34	1490.18	1087.76	1850.94	1143.21	1490.13	2939.55	2010.92	1624.87	1433.89	1925.39	1090.92	2375.51	2024.77	2221.75	2254.14	1180.54	1150.46	1816.5			1455.91	1869.97	1259.4	2168.25
16	1900.63	1951.1	2516.53	1668.49	1916.71		2254.58	1414.99	1317.47		1433.77	1330.92	2132.73	1807.48	2536.11	1880.32	1210.02	1355.5	2322.25	1422.82	1558.21	1892.04		2416.89	1860.14	1491.15	1086.66	1852.85	1129.94	1497.78	2957.53	2008.5	1613.22	1426.95	1914.87	1089.38	2377.02	2036.2	2221.55	2259.92	1171.28	1137.8	1815.73			1443.92	1860.74	1247.77	2151.06
17	1899.41	1947.5	2517.22	1658.46	1909.53		2257.99	1419.62	1328.17		1419.84	1321.84	2128.36	1807.9	2531.2	1886.31	1218.29	1338.56	2329.98	1426.6	1561.64	1880.26		2404.65	1837.78	1487.43	1078.44	1843.39	1133.05	1497.61	2943.62	2027.62	1612	1422.35	1928.05	1089.58	2366.15	2043.49	2218.54	2263.9	1169.07	1134.38	1804.27			1442.29	1865.95	1234.74	2150.44
18	1885.34	1937.61	2514.3	1661.43	1894.75		2256.39	1416.67	1324.38		1416.13	1321.6	2122.7	1797.91	2535.95	1881.87	1218.56	1336.66	2321.99	1423.98	1565.71	1871.06		2394.96	1833.67	1484.86	1077.4	1844.65	1140.3	1500.84	2937.22	1974.21	1603.99	1430.68	1918.13	1092	2370.94	2044.89	2210.58	2273.46	1166.25	1129.35	1806.75			1431.65	1859.41	1226.6	2149.55
19	1886.75	1925.02	2513.68	1665.57	1877.59		2251.81	1416.16	1322.08		1410.89	1323.74	2116.36	1791.46	2543.14	1903.96	1220.5	1330.63	2312.94	1426.17	1561.61	1873.9		2392.92	1827.59	1478.97	1073.46	1836.22	1148.16	1500.9	2940.93	2010.54	1600.59	1419.99	1914.5	1092.85	2364.23	2063.81	2198.73	2266.06	1155.99	1120.36	1807.95			1426.62	1872.2	1233.12	2144.19
20	1875.66	1911.34	2510.53	1655.43	1870.49		2242.69	1410.46	1315.57		1395.19	1323.39	2101.67	1784.13	2511.37	1892.13	1221.64	1316.32	2303.6	1436.46	1574.49	1854.04		2398.94	1814.75	1480.46	1069.54	1821.47	1143.77	1511.65	2928.06	2041.89	1601.67	1418.37	1924.14	1091.02	2355.88	2061.49	2195.98	2274.63	1150.05	1123.16	1813.54			1422.15	1864.77	1228.05	2159.4
21	1869.8	1918.91	2514.57	1664.97	1868.55		2248.6	1414.13	1316.37		1406.52	1337.19	2114.67	1794.7	2520.17	1894.27	1234.5	1325.5	2311.54	1440.97	1580.7	1865.63		2396.59	1815.92	1480.77	1077.17	1830.38	1137.67	1502.02	2927.78	1994.93	1595.85	1404.6	1923.32	1088.9	2347.8	2066.06	2187.67	2265.29	1152.21	1116.42	1813.31			1431.45	1865.02	1222.19	2171.49
22	1857.26	1921.76	2517.44	1679.1	1870.07		2236.85	1410.82	1321.92		1406.16	1316.99	2113.95	1777.76	2523.05	1913.69	1226.58	1317.97	2301.04	1439.24	1583.69	1861.26		2407.28	1808.59	1473.8	1069.41	1827.04	1139.41	1510.82	2912	1992.61	1591.15	1398.42	1927.97	1092.82	2349.89	2065.54	2187.05	2273.98	1148.43	1123.76	1812.62			1417.92	1862.12	1218.74	2193.88
23	1862.16	1923.2	2526.13	1690.32	1854.97		2224.57	1412.42	1320.75		1389.03	1319.16	2127.16	1770.97	2514.36	1906.2	1228.15	1311.64	2303.76	1447.36	1584.42	1864.59		2387.56	1800.08	1466.9	1071.85	1820.74	1135.03	1507.78	2910.06	1993.28	1588.48	1398.99	1920.53	1086.67	2337.66	2072.3	2185.47	2278.81	1146.62	1124.34	1823.09			1420.9	1854.11	1213.64	2192.44
24	1868.07	1917.14	2533.56	1698.55	1856.5		2215.73	1415.28	1318.43		1396.15	1318.79	2137.36	1780.64	2508.01	1912.05	1238.2	1306.26	2297.44	1441.47	1593.01	1860.69		2397.62	1804.75	1476.47	1077.1	1821.97	1136.03	1508.71	2906.61	2000.49	1590.91	1398.9	1932.92	1096.53	2342.19	2077.77	2175.84	2272.36	1154.25	1109.41	1820.42			1411.74	1854.41	1222.64	2201.7
25	1859.43	1925.18	2548.58	1711.16	1848.63		2216.64	1410.77	1330.05		1380.03	1315.12	2142.54	1769.53	2495.73	1914.07	1244.06	1314.18	2299.38	1444.85	1595.78	1865.36		2400.86	1799.82	1458.36	1070.81	1829.62	1124.76	1502.41	2891.04	2024.62	1582.72	1390	1939.47	1104.69	2332.46	2091.02	2172.07	2275.4	1151.74	1107.29	1817.92			1410.03	1850.76	1216.56	2172.24
26	1848.17	1907.93	2534.37	1720.03	1835.33		2204.7	1409.27	1331.64		1378.18	1316.59	2147.91	1771	2493.74	1920.86	1243.54	1308.53	2304.8	1445.47	1601.68	1862.75		2417.9	1791.18	1468.67	1080.81	1827.68	1135.52	1512.39	2883.83	2037.39	1581.76	1385.83	1937.74	1108.99	2334.5	2089.32	2172.71	2279.33	1156.81	1096.7	1805.78			1404.01	1846.31	1217.9	2191.25
27	1851.06	1895.88	2546.01	1742.59	1825.45		2201.99	1421.22	1341.92		1380.65	1328.29	2155.38	1770.16	2499.26	1927.1	1244.32	1316.05	2312.37	1457.51	1604.95	1860.54		2420.82	1791.16	1470.01	1068.31	1841.24	1135.18	1499.2	2881.83	2044.86	1584.87	1385.96	1934.48	1090.25	2324.21	2092.36	2178.87	2293.48	1162.58	1099.66	1802.38			1403.74	1851.9	1214.6	2173.58
28	1835.65	1897.34	2556.45	1738.45	1819.88		2204.96	1423.09	1348.08		1368.3	1326.1	2159.49	1788.83	2482	1930.52	1252.64	1317	2321.64	1450.86	1601.22	1860.2		2397.65	1776.26	1451.45	1074.39	1851.97	1105.98	1504.71	2864.03	2028.94	1572.1	1366.31	1945.49	1093.63	2313.65	2097.57	2172.81	2296.97	1160.05	1089.2	1800.15			1402.03	1840.98	1212.05	2169.63
29	1826.99	1892.23	2552.63	1761.32	1820.28		2200.19	1415.05	1343.9		1353.99	1320.07	2164.11	1773.84	2478.93	1933.15	1256.7	1311.1	2322.2	1455.45	1603.47	1867.28		2415.38	1780.78	1484.06	1066.58	1848.95	1118.09	1510.87	2857.91	2048.23	1578.31	1382.09	1939.99	1082.75	2311.39	2094.98	2168.35	2296.55	1165.83	1097.17	1793.74			1394.16	1840.39	1213.36	2183.93
30	1824.07	1886.88	2566.83	1772.32	1828.96		2194.53	1423.55	1357.75		1357.21	1324.4	2167.1	1778.87	2466.63	1943.98	1257.91	1322.87	2326.47	1464.06	1614.47	1861.16		2437.11	1772.8	1478.5	1065.62	1839.34	1119.47	1489.27	2868.68	2050.35	1581.93	1374.75	1945.35	1102.82	2306.45	2083.21	2165.52	2295.97	1170.85	1101.48	1802			1389.67	1838.47	1216.1	2182.87
31	1825.43	1888.65	2571.41	1788.03	1820.44		2189.88	1420.33	1356.34		1347.65	1333.93	2164.96	1791.89	2455.57	1935.85	1260.39	1316.45	2331.91	1463.28	1625.62	1857.88		2437.99	1767.92	1483.97	1060.3	1831.2	1123.27	1497.17	2864.36	2055.07	1584.6	1375.84	1943.34	1099.71	2292.14	2085.78	2164.98	2282.21	1167.66	1093.17	1808.85			1393.02	1824.06	1222.58	2180.24
32	1818.28	1888.33	2568.65	1804.34	1815.26		2183.77	1419.53	1370.6		1339.58	1328.66	2174.21	1797.94	2446.37	1945.08	1256.64	1318.31	2340.2	1472.35	1619.12	1860.26		2432.02	1762.25	1477.24	1070.21	1830.1	1111.55	1498.73	2861.88	2018.54	1570.01	1360.74	1945.84	1105.01	2290.4	2082.31	2164.82	2296.75	1182.27	1095.65	1805.56			1389.87	1814.19	1224.51	2185.06
33	1821.07	1884.5	2582.98	1818.46	1812.83		2187.52	1421.47	1374.97		1349.41	1332.92	2198.19	1811.08	2447.41	1941.71	1271.16	1333.58	2338.52	1476.24	1628.63	1864.77		2442.67	1766.77	1488.2	1074.95	1842.83	1111.53	1489.43	2866.3	2018.17	1583.9	1355.08	1959.83	1112.57	2281.06	2084.08	2164.33	2303.71	1190.63	1101.55	1806.06			1389.7	1814.81	1215.06	2181.94
34	1815.72	1885.83	2577.88	1832.17	1814.72		2185.89	1420.96	1385.72		1345.79	1331.93	2187.38	1807.49	2444.47	1953.76	1262.62	1319.66	2340.06	1476.74	1625.77	1865.22		2450.55	1760.97	1486.49	1074.69	1854.29	1111.07	1500.52	2862.94	2062.11	1580.32	1347.67	1958.74	1102.02	2270.75	2071.83	2162.45	2300.5	1188.18	1088.53	1804.74			1393.98	1811.33	1216.2	2189.02
35	1816.01	1887.15	2584.84	1849.78	1817.83		2178.29	1431.14	1387.56		1336.54	1332.43	2207.39	1822.46	2445.64	1967.95	1262.32	1332.12	2338.31	1476.72	1633.74	1859.5		2452.32	1766.65	1499.4	1073.56	1856.38	1111.02	1503.26	2852	2061.92	1589.58	1344.45	1940.98	1095.98	2271.21	2080.31	2170.51	2302.12	1195.63	1111.4	1805.58			1385.71	1811.07	1225.61	2183.33
36	1802.97	1880.05	2609.09	1856.46	1817.2		2184.17	1417.14	1396.96		1326.36	1337.72	2215.9	1806.7	2434.84	1963.78	1261.5	1325.67	2350.24	1479.21	1641.77	1870.9		2445.31	1756.77	1499.73	1071.82	1854.78	1106.79	1506.39	2845.14	2061.08	1584.37	1344.39	1962.04	1104.75	2258.51	2080.3	2157.43	2298.84	1201.32	1105.97	1824.44			1380.96	1796.4	1215.37	2181.51
37	1798.27	1882.93	2601.59	1877.45	1815.4		2183.7	1413.95	1395.72		1321.78	1337.93	2220.66	1814.07	2443.22	1970.94	1263.3	1329.49	2356.06	1485.34	1639.8	1878.28		2456.05	1753.98	1507.13	1078.72	1866.42	1107.81	1491.15	2843.02	2064.36	1594.77	1341.36	1955.92	1100.63	2255.19	2086.78	2153.59	2302.77	1212.91	1100.94	1823.51			1399.53	1787	1217.15	2184.86
38	1797.71	1870.63	2602.21	1881.4	1807.44		2171.07	1417.99	1397.12		1319.57	1343.83	2221.42	1833.73	2445.68	1983.76	1258.93	1336.85	2358.11	1490.07	1626.2	1869.98		2456.99	1750.36	1530.18	1085.28	1885.99	1105.72	1500.86	2836.66	2066.89	1595.7	1348.25	1951	1091.77	2248.69	2082.12	2155.65	2305.12	1225.48	1108.18	1838.79			1391.16	1793.01	1219.48	2192.94
39	1800.46	1872.29	2613.26	1898.01	1818.92		2163.61	1404.29	1407.29		1317.17	1334.13	2238.63	1838.74	2445.39	1986.76	1270.59	1338.13	2359.32	1488.79	1616.69	1873.62		2460.84	1743.67	1528.18	1083.31	1875.61	1110.27	1499.45	2840.34	2043.65	1597.34	1343.24	1962.52	1087.67	2242.96	2079.32	2161	2294.06	1217.75	1115.5	1844.31			1401.42	1794.05	1216.96	2186.05
40	1803.32	1871.39	2603	1904.95	1820.81		2168.56	1401.69	1414.68		1308.13	1345.32	2236.62	1844.14	2456.13	1987.4	1271.08	1336.49	2362.04	1489.3	1601.31	1872.09		2460.32	1746.44	1534.33	1078.64	1885.76	1113.51	1507.37	2843.06	2043.47	1590.37	1332.05	1968.65	1090.25	2230.69	2087.34	2161.24	2299.7	1221.96	1115.94	1845.42			1402.76	1789.58	1221.01	2177.6
41	1785.87	1865.15	2619.73	1920.76	1817.97		2161.96	1412.88	1409.85		1312.17	1332.77	2250.53	1855.14	2452.74	1993.56	1263.56	1349.22	2369.23	1494.41	1600.07	1875.92		2474.16	1738.37	1545.83	1072.9	1883.33	1109.24	1502.32	2832.91	2043.98	1594.84	1335.88	1965.55	1090.42	2241.01	2081.69	2175.74	2287.54	1219.29	1118.81	1861.32			1401.33	1781.05	1232.72	2178.4
42	1794.53	1869.51	2626.57	1928.18	1822.9		2170.05	1417.47	1410.28		1300.96	1337.84	2258.35	1868.7	2463.97	2010.81	1266.37	1345.59	2382.79	1498.37	1610.69	1869.67		2473.98	1729.63	1559.04	1079.54	1900.06	1108.62	1508.47	2826.63	2081.37	1595.31	1328.58	1962.75	1091.09	2243.5	2080.79	2167.2	2292.31	1230.83	1118.14	1865.58			1398.4	1778.24	1235.96	2180.06
43	1797.61	1870.04	2626.28	1940.53	1822.65		2156.24	1416.16	1406.84		1306.38	1344.04	2251.86	1878.98	2471.27	2013.83	1248.68	1355.26	2373.58	1504.88	1597.89	1881.19		2479.05	1731.24	1563.08	1079.16	1907.1	1109.47	1501.01	2822.35	2086.85	1597.07	1327.01	1964.76	1095.74	2240.9	2078.62	2178.02	2302.68	1244.46	1117.27	1890.65			1408.77	1769.61	1226.07	2176.44
44	1795.67	1868.66	2623.66	1935.26	1829.99		2143.66	1417.96	1405.71		1305.6	1338.94	2260.57	1887.28	2489.3	2030.55	1253.75	1359.06	2385.77	1498.94	1598.26	1882.18		2480.2	1732.43	1581.21	1073.77	1904.88	1104.07	1493.11	2807.59	2053.49	1606.9	1322.49	1977.42	1103.93	2250.15	2071.4	2180.13	2308.53	1242.1	1118.8	1906.85			1416.99	1771.94	1235.75	2176.31
45	1801.53	1871.9	2639.91	1944.91	1824.64		2141.75	1415.59	1408.03		1294.6	1346.96	2275.11	1905.48	2481.39	2045.7	1244.15	1364.03	2389.51	1499.26	1593.33	1884.99		2484.61	1737.12	1586.08	1082.88	1916.33	1099.81	1491.47	2806.31	2089.52	1607.95	1335.68	1985.8	1102.19	2249.83	2066.45	2173.76	2312.73	1234.7	1130.51	1884.77			1413.68	1771.98	1223.43	2169.96
46	1803.52	1873.27	2632.13	1940.6	1829.34		2135.76	1414.39	1411.72		1297.64	1347.01	2274.03	1909.11	2487.35	2044.65	1250.93	1376.42	2392.87	1494.39	1582.13	1892.75		2485.84	1736.65	1585.91	1090.93	1920.95	1090.75	1488.53	2807.06	2098.57	1607	1315.43	1981.98	1087.22	2237.74	2045.76	2185.81	2297	1240.06	1128.53	1886.92			1427.45	1770.56	1240.17	2169.99
47	1815.45	1868.96	2644.23	1938.47	1840.52		2143.04	1410.04	1403.58		1307.18	1351.5	2275.43	1922.4	2479.21	2054.42	1231.58	1372.45	2404.11	1499.48	1584.43	1906.02		2488.96	1729.26	1610.51	1086.49	1920.67	1096.18	1492.48	2796.87	2119.42	1610.48	1324.06	1983.53	1092.82	2251.73	2058.42	2178.15	2295.84	1249.68	1133.06	1892.23			1427.65	1759.79	1234.13	2174.24
48	1812.99	1868.17	2641.87	1937.61	1842.72		2141.71	1408.94	1405.01		1309.85	1346.56	2285.65	1943.99	2479.9	2067.33	1240.98	1369.5	2407.02	1499.9	1585.05	1910.48		2492.36	1725.96	1604.77	1086.8	1942.09	1101.78	1495.35	2803.43	2114.3	1615.22	1320.28	1976.34	1082.19	2234.9	2068.93	2181.09	2291.33	1246	1119.17	1930.83			1429.52	1758.23	1236.35	2170.79
49	1802.77	1869.45	2653.54	1945.45	1848.57		2140.63	1414.5	1404.9		1314.23	1343.47	2303.77	1939.88	2477.6	2062.8	1240.81	1369.26	2402.98	1500.31	1595.51	1916.53		2499.77	1719.54	1626.49	1092.65	1956.56	1101.32	1501.72	2806.22	2126.8	1612.01	1331.34	2014.8	1105.49	2261.69	2079.9	2185.5	2300.36	1249.46	1139.38	1920.46			1433.38	1768.68	1255.33	2168.95
50	1818.58	1872.05	2662.22	1944.03	1853.38		2134.8	1416.86	1392.05		1308.56	1345.04	2297.63	1956.89	2470.2	2067.72	1242.31	1382.13	2417.64	1493.37	1584.77	1917.8		2498.38	1719.25	1638.77	1092.94	1952.35	1094.2	1501.01	2785.73	2133.24	1615.29	1329.61	2003.52	1111.31	2262.1	2079.53	2191.34	2310.44	1262.59	1136.44	1931.42			1439.38	1760.22	1246.14	2155.85
[truncated: 227 more columns]

## Sheet: A
dA/dt (µm2/min)	3.15409	13.5096	21.1011	14.127	8.13682		20.0796	5.92747	21.4692		4.5837	10.7792	13.5172	25.2338	13.2743	3.22282	5.31697	13.9074	9.88838	28.0234	7.93576	29.2421		19.6326	3.25143	3.75747	18.6969	12.0628	5.23873	24.5247	6.5447	25.5018	17.3233	12.8238	43.9157	3.90023	6.94531	8.70688	7.80682	5.42212	15.0799	9.15602	16.5636			8.83455	5.66779	14.6309	12.2029
position	4	4	4	4	4	4	4	4	4	4	5	5	5	5	5	5	5	5	5	5	5	5	6	6	6	6	6	6	6	6	6	6	6	6	7	7	7	7	7	7	7	7	7	7	8	8	8	8	8
time (min) / cell	1	2	3	4	5	6	7	8 s1-0	9	12	1	2	4	5	7	6	8	9	10	11	12	13	1	2	3 s1-0	4	5	6	7	8	9	10	11	12	1	2 s14-0	5	6	7	11	12 s2-0	13	14	15	1	2	3	4	5
0	12.3767	29.2258	49.195	11.4407	33.074		59.3876	19.5532	38.6903		8.52851	13.4168	14.1449	20.2812	26.3136	73.012	5.82435	33.906	68.0201	60.3236	21.3213	76.1326		29.2258	23.5054	14.7689	14.8729	41.8105	12.2727	35.3621	14.5609	66.772	50.7551	12.2727	37.8583	23.9214	35.4661	39.8344	11.4407	6.96842	15.913	32.658	45.5547			13.3128	19.9692	19.9692	30.9939
1			65.5239						55.9554		27.3536					94.126		79.9808						59.9076			22.5694	63.5478		41.7065	27.5617			36.6102	73.9484		28.7057		19.3452			40.3544	56.8914			38.5863	23.9214	39.8344	63.1318
2				50.651				23.0894	54.1873			25.5855		81.3329	73.6364	88.925			96.8298	94.1257	47.9469	124.183		77.3807		22.7774	26.4176		18.6171	61.8837		112.951	101.302	55.0193	116.071			58.7635			49.507		62.1957				40.0424	49.923
3		64.8999	75.8206						62.2997								17.369			171.298				99.118			23.2974	67.7081	27.1456	87.0532	44.2027		112.327	50.131	185.235		48.2589		30.3698	6.96842		42.0185				58.0355			78.4207
4				74.7805	46.8028			36.5062	72.2843							94.75		129.072				221.013		75.8206			29.5378		36.7142	146.753			93.5016	48.1549				87.8853	31.6179		62.1957	59.2836	88.6133				45.0347	55.0193
5							169.53		78.2127		36.1942	61.9877	48.2589		137.704	91.109			137.392		63.2358			107.75		25.0655	46.0748	84.4531	38.8983		59.5956		98.8059	63.1318	309.523				56.9954		70.5162					76.5486			95.3737
6				97.0378	74.8845			55.1233	136.872					137.6						258.664		242.751		138.016	45.2427		71.8683		39.2104	165.786		218.517	153.201	73.2204		47.3228		98.3899					134.064				50.651	75.6125
7	40.4584	123.351	186.483				213.941		180.867				91.0055	226.214		92.67	42.6426	132.4			74.3645			162.042		42.5386	146.857	139.68	34.9461		64.0679	251.487	148.313		372.446		65.0039		67.292		117.631	80.8129				86.6372		99.326	107.022
8				136.248				54.6033				97.3499							144.985			327.932		159.13			173.69		51.3791			263.24		131.568				109.831		47.8429			155.489				68.8521	143.321
9			235.158		105.046		234.222	67.6041	235.886				106.294			105.566				296.938	100.262			211.445	52.2111				67.3961		75.8206		233.702		450.035		77.7967	117.839	78.5247		156.425	120.127				97.9739			161.418
10	42.0705			153.409				80.6048					164.226		161.314	122.519		194.804				358.926		253.255		52.3151								148.729	442.339		114.511	132.296					216.541					180.659
11		172.858							247.951		59.4916	166.93					43.0586		185.131		139.056			258.04				239.006			83.621		265.736			64.0679			98.9099		180.139	107.646				136.664			176.291
12			409.681	165.474	179.411		280.505	87.5733					143.425	280.401		114.927				319.507					81.3329	53.9792					109.103	304.114		155.177	466.468						231.518							183.779
13									268.128			242.231				129.8	61.1557	246.079				397.512								157.257			296.626		487.633	83.101			128.864	53.1472	233.286	113.575	278.529			145.713		202.604	186.587
14								84.4531	254.607		67.084		275.617		168.802					327.516				407.705				300.89					341.036	176.915	508.799			185.131			248.679	126.264
15	43.6826			281.857	266.568		286.953		284.353							144.985			209.365		141.24	443.483					245.871									140.512						155.697				170.258			260.64
16		195.636							275.617			296.834	321.795				76.6526	277.905		335.524				437.97	190.643	86.0132							362.046	181.491	540.208				255.231		310.979		266.672				103.694		303.282
17	51.6911								258.56		101.094			347.381																						144.673			292.362	94.0217		226.422				191.892		229.542	358.822
18				241.086	305.05		297.354		287.681							180.867			222.261			492.262									170.674			185.755			248.679					225.902
19			443.275					143.321			202.708	344.989	387.735		292.674		95.5817													161.002			354.037		598.868				394.808			242.855				224.237			416.129
20	90.9015												394.132	390.855	297.25			347.277		430.898		501.154		485.917								328.66				128.968		221.013				263.968
21					331.988		351.957		368.286			391.48				206.868			259.288								275.201	350.813					407.6						436.618		325.228	254.399					141.24
22													400.528			236.094	105.67				152.265	510.047									184.923											256.791	303.906			226.734
23								165.786																	219.557															107.854		272.08
24	131.36				395.952		313.579		347.797		208.845	430.066		431.522	355.493	180.763	129.488	377.231						445.251					69.2682	164.434					658.776		314.411		448.787		396.992						205.412	281.961	471.772
25		266.36	498.606													298.082			303.282	443.171	164.642											351.749				176.499										246.391
26													400.424			285.913										197.924				170.778				235.886				262.408
27					402.192			165.578									148.417							545.825																120.543	470.524	320.859
28				272.6																	205.724							384.927		181.075																258.664
29	292.778		433.602				380.247		365.27		231.622	430.17	437.97	442.235	384.303	295.378		356.013				497.358							84.2451	166.306					650.247		397.824		470.836									264.904	539.272
30																	191.372		350.293								289.241			178.579	248.887		424.137			196.676											265.424
31		303.178			442.235											308.691														186.899								309.523		165.89		334.484	344.053			315.243
32													470.42							510.255	257.103			590.027	272.184							357.677
33								190.227								287.473	226.318									201.772								267.088							457.315					284.769
34	351.021		502.038	230.998	427.258		399.904		365.166		258.56	348.733		477.389	408.225			418.729	369.95			543.017						349.461							626.118		469.38		539.48	162.978
35													486.853			284.873														207.284																			543.121
36															412.229						277.385			589.091							265.944					215.709										269.376		200.732
37																	291.113										288.201		121.791									360.486	575.363		489.765		325.644				301.41
38								227.254					521.903			271.768																	462.516									402.816				253.983
39	419.353	326.892	494.446		454.299		451.803		351.957		302.138	357.782		488.205	416.233			425.178	404.168	530.12	332.82	538.544		738.34	278.217	200.108		376.711						318.363	626.222		506.302		611.245	209.261									587.115
40																277.905																397.824
41	450.295	353.881											540.833				265.424																													302.45		187.003
42																297.666															295.586							407.392			385.759
43								259.288																700.586						284.249												456.379
44	481.237	380.871	475.413	241.399	500.582		507.134		340.1			383.575	629.966	437.97	434.226	194.388	331.26	423.409	386.383	499.646	346.029	535.944				221.013	265.528	314.099	110.247				443.587		645.359		569.018		648.999				318.883				349.669
45	490.493										308.223														302.658															226.526						284.353			506.926
46	479.989															172.962																393.456										503.702						200.316
47	435.37																																	345.613
48	402.92																																								379.727						368.078
49	459.604							229.542								139.576									336.356
50	440.674	446.083	438.178	235.782	480.093		482.693		330.74		314.307	358.302	688.625	430.586	442.859	131.048	275.617	392	341.557	502.038	351.125	540.728		761.222		170.778	282.897	276.137	184.299	280.609	312.747	423.305	480.301	365.894	562.05		581.707	418.729	640.262	275.305		485.917	293.714			268.128	386.487	206.972	489.245
[truncated: 91 more columns]
