# Supplementary material for: A mechano-osmotic feedback couples cell volume to the rate of cell deformation
Source: eLife journal article supplement (doi:10.7554/elife.72381), 2022-04-13
Supplement: supp [file GdCl3_dVdt_dAdt.xlsx]

## Sheet: Sheet1
exp	pos	cell	Vi	t of V loss	deltaV% at t of V loss	A at t of V loss	t of 90	deltaV% at t of 90	deltaS% at t of 90	A at 90	dV/dt i	dA/dt i
20180605 0	4	2	2306.57	20	12.2339	474.581	4	2.71323	15.5513	317.427	-18.6181	34.164
20180605 0	4	4	1384.47	15	9.9352	373.694	2	0.335364	17.9494	317.427	-10.7346	22.2992
20180605 0	8	5	1681.05	40	3.86797	746.869	9	-3.95353	21.4774	273.64	7.9872	19.5045
20180605 0	8	7	1590.96	20	6.05221	320.755	11	2.12792	16.3644	251.175	-3.09511	7.87155
20180605 0	8	8	1522.25	27	14.4926	433.498	5	2.29852	17.1713	249.719	-11.0008	37.4765
20180605 0	8	10	1768.31	40	17.9002	840.579	4	3.0766	14.5454	259.912	-16.4437	41.3979
20180605 0	9	1	1934.08	39	15.0726	855.555	3	1.99557	22.1735	327.412	-17.9456	49.2879
20180605 0	9	2	1113.55	15	4.15291	324.291	4	1.69485	19.9074	214.981	-5.10505	32.2453
20180605 0	9	3	2282.88	27	12.0386	873.445	1	1.33596	6.33339	208.845	-22.3085	40.2235
20180605 0	9	5	1728.22	46	7.0351	573.855	14	0.854685	22.722	303.594	0.648482	7.60926
20180605 0	10	1	1631.7	17	7.94561	535.424	2	1.11674	19.9528	275.721	-11.8355	38.0045
20180605 0	10	2	1541.04	12	9.21737	465.22	3	2.31333	20.3283	271.456	-15.2528	41.7617
20180605 0	10	3	2014.57	39	2.63186	520.239	10	0.222739	7.87443	202.708	0.402985	16.0233
20180605 0	10	5	2483.41	44	8.57972	547.125	19	2.39544	6.16676	227.774	-3.8441	7.72174
20180605 0	10	6	2398.46	22	11.4311	583.683	7	3.07947	17.7916	346.965	-12.1312	37.9841
20180605 0	10	7	1462.05	25	10.9335	569.226	4	1.52876	13.6132	216.749	-10.441	34.9933
20180605 0	10	8	1339.13	15	14.9129	368.494	3	3.99691	14.5962	219.349	-18.7464	28.7261
20180605 0	10	9	2128.23	42	16.2886	752.901	8	1.63944	16.4273	303.282	-4.66305	26.3971
20180605 0	10	13	1380.06	20	3.50948	369.014	8	0.376381	8.56595	164.642	-0.27154	12.7726
20180605 0	10	14	2259.5	19	8.39385	555.497	5	1.94463	6.15751	210.093	-9.47964	19.8524
20180605 0	11	3	2483.64	32	2.25052	400.008	17	-0.308896	15.8325	320.443	5.43962	10.3518
20180605 0	11	4	2314.4	9	6.01538	644.943	2	1.78489	23.2529	376.399	-14.1744	49.1598
20180605 0	11	5	1418.41	8	8.7788	385.135	3	4.30774	22.433	273.848	-12.2867	35.4494
20180605 0	11	6	1240.01	29	12.4023	637.558	2	1.4082	19.42	227.566	-12.7456	42.6864
20180605 1	1	5	2174.36	36	5.22132	324.5	21	2.84251	11.1131	265.84	-6.41554	9.48354
20180605 1	1	6	1737.56	59	5.71538	434.85	26	-0.420653	8.99784	191.476	4.33753	8.37234
20180605 1	3	1	2626.22	28	12.4035	574.01	2	0.991091	16.5209	346.445	-13.4697	25.9107
20180605 1	3	8	1485	28	19.5917	719.307	4	4.40043	15.3747	241.399	-14.5073	33.6847
20180605 1	5	10	2135.01	28	9.50943	835.898	3	0.499226	14.3459	280.401	-9.98769	32.2444
20180605 1	7	4	1845.04	17	8.88368	324.5	8	0.448134	15.635	265.112	-14.8109	50.9722
20180605 1	7	5	2135.28	39	8.75658	453.571	17	2.61537	6.39079	210.405	-0.34206	11.1994
20180605 1	7	13	2302.66	23	11.6907	492.313	5	1.98829	12.5788	285.913	-12.2095	30.4998
20180605 1	8	12	2172.54	33	12.6111	400.841	10	8.90699	2.31036	210.301	-19.329	14.2621
20180605 1	10	1	1366.92	15	9.60399	459.708	1	0.361269	8.28279	161.002	-12.8861	31.2647
20180605 1	10	2	1643.73	15	13.6542	577.443	3	4.70819	13.9876	249.927	-20.7036	47.3497
20180605 1	10	8	1902.37	18	9.84772	498.19	4	3.24461	18.2063	300.89	-17.5309	47.1942
20180605 1	10	14	1642.33	46	16.0175	650.507	2	0.947002	15.0471	242.543	-10.8877	30.1599
20180605 1	11	1	1827.45	17	8.16625	542.029	4	2.08591	6.77431	190.331	-14.149	34.9863
20180605 1	11	4	1469.46	11	7.27132	434.279	3	2.17846	21.8759	271.456	-11.0579	36.5506
20180605 1	11	5	2114.13	60	14.2551	863.564	3	2.17869	14.3105	286.537	-18.4608	30.5482
20200820	1	1	1957.69	19	6.91651	426.53	7	4.72522	5.86525	207.076	-11.1719	25.2802
20200820	1	3	2793.81	26	4.86151	301.046	14	3.70665	8.00947	276.761	-6.888	19.5973
20200820	1	4	3004.4	27	9.15398	453.883	10	3.2112	5.77617	260.328	-8.57195	22.0318
20200820	1	5	2647.33	16	2.25593	112.951					-1.65884	7.61864
20200820	1	6	3195.1	46	9.32843	368.442	10	3.61692	8.02289	308.691	-11.687	28.6704
20200820	1	7	3288.37	35	11.1317	433.55	12	4.77326	6.44052	301.722	-13.2049	17.494
20200820	1	9	3333.26	16	7.89001	529.184	7	3.97734	8.46309	326.788	-22.0646	39.3601
20200820	3	3	1118.11	5	2.90352	60.324	10	1.84896	11.5753	170.57	-1.25718	18.0327
20200820	3	4	1946.35	37	13.0963	401.048	10	3.02105	9.55299	233.39	-6.48585	19.6335
20200820	3	5	1960.08	24	6.35035	373.798	8	1.40131	7.57617	203.852	-7.25087	25.7219
20200820	3	6	2715.87	28	16.8862	360.798	4	12.9245	0.518755	253.359	-33.5661	14.8174
20200820	3	7	3422.66	16	6.40784	580.459	3	1.53131	8.20704	307.026	-17.6815	44.9958
20200820	3	10	2897.15	9	1.57229	71.868					-4.83338	5.26321
20200820	3	11	2346.67	31	10.0633	371.094	15	4.67798	9.7161	276.241	-6.34541	13.3847
20200820	3	16	3339.5	31	5.90571	575.467	11	-1.70621	9.13092	285.393	3.7607	19.8458
