# Supplementary material for: A mechano-osmotic feedback couples cell volume to the rate of cell deformation
Source: eLife journal article supplement (doi:10.7554/elife.72381), 2022-04-13
Supplement: supp [file hek293_confinement.xlsx]

## Sheet: Sheet1
20170323 hek293gem texar red dextran
1	7.6c		20c
V (µm3)	1032.03		1668.75									61.7368	69.393	89.006	100
stdev	280.745		546.737									8.9575	14.4915	5.25415	5.88885
n	74		165
											av	1117.37	1255.94	1610.91	1809.89
2	7.6c		20c								stdev	162.121	262.28	95.0944	106.582
V (µm3)	1191.29		1921.9
stdev	357.911		484.058								control	5.1	7.6	11.2	20
n	123		263							20170323	1		1032.03		1668.75
											2		1191.29		1921.9
3	7.6c		20c								3		1544.5		1800.08
V (µm3)	1544.5		1800.08								4	1032.49		1678.16
stdev	512.016		560.217								5	1304.31		1543.67	1848.85
n	167		213							20170324		1015.31
4	5.1c		11.2c
V (µm3)	1032.49		1678.16
stdev	254.279		471.966
n	27		161
5	5.1c		11.2c		20c
V (µm3)	1304.31		1543.67		1848.85
stdev	328.678		491.813		571.051
n	75		264		239
20170324 hek293gem texar red dextran
	5.1c
V (µm3)	1015.31
stdev	206.834
n	32
