# Supplementary material for: A mechano-osmotic feedback couples cell volume to the rate of cell deformation
Source: eLife journal article supplement (doi:10.7554/elife.72381), 2022-04-13
Supplement: supp [file lat_A.xlsx]

## Sheet: Sheet1
t.tif:p40_w11 GFP_t8	453.051	9145.09	4.14319e+06
t.tif:p40_w11 GFP_t10	453.051	823.71	373183
				v	a							v	a							v	a							v	a							v	a
t.tif:p40_w11 GFP_t8	103.174	14138.2	1.4587e+06	206.348	397.952	33.4576		t.tif:p40_w11 GFP_t8	103.174	14138.2	1.4587e+06	206.348	358.629	37.1261		t.tif:p40_w11 GFP_t8	103.174	14138.2	1.4587e+06	206.348	354.929	37.5132		t.tif:p40_w11 GFP_t8	103.174	14138.2	1.4587e+06	206.348	273.216	48.7325		t.tif:p40_w11 GFP_t8	103.174	14138.2	1.4587e+06	206.348	436.625	30.4941
t.tif:p40_w11 GFP_t10	103.174	4984.88	514311	206.348	349.649	11.901		t.tif:p40_w11 GFP_t10	103.174	4984.88	514311	206.348	344.369	12.0835		t.tif:p40_w11 GFP_t10	103.174	4984.88	514311	206.348	406.968	10.2248		t.tif:p40_w11 GFP_t10	103.174	4984.88	514311	206.348	388.013	10.7243		t.tif:p40_w11 GFP_t10	103.174	4984.88	514311	206.348	388.868	10.7007
t.tif:p40_w11 GFP_t8	103.174	14934.1	1.54082e+06					t.tif:p40_w11 GFP_t8	103.174	14855.5	1.5327e+06					t.tif:p40_w11 GFP_t8	103.174	14848.1	1.53194e+06					t.tif:p40_w11 GFP_t8	103.174	14684.6	1.51508e+06					t.tif:p40_w11 GFP_t8	103.174	15011.5	1.5488e+06
t.tif:p40_w11 GFP_t10	103.174	5684.18	586461					t.tif:p40_w11 GFP_t10	103.174	5673.62	585371					t.tif:p40_w11 GFP_t10	103.174	5798.82	598288					t.tif:p40_w11 GFP_t10	103.174	5760.91	594377					t.tif:p40_w11 GFP_t10	103.174	5762.62	594553

## Sheet: 37.51 10.22
ID	lineage	Frame	Cell_Intensisty
b AP.tif	1	1	5039.52	100	0
b AP.tif	1	2	5075.86	100.721	0.5
b AP.tif	1	3	5068.59	100.577	1
b AP.tif	1	4	5082.2	100.847	1.5
b AP.tif	1	5	5074.89	100.702	2
b AP.tif	1	6	5091.17	101.025	2.5
b AP.tif	1	7	5081.06	100.824	3
b AP.tif	1	8	5052.38	100.255	3.5
d.tif	1	10	4286.53	85.0583	4.5
d.tif	1	11	4322.88	85.7796	5
d.tif	1	12	4350.26	86.3229	5.5
d.tif	1	13	4354.03	86.3977	6
d.tif	1	14	4362.9	86.5736	6.5
d.tif	1	15	4370.7	86.7284	7
d.tif	1	16	4380.67	86.9264	7.5
d.tif	1	17	4390.77	87.1268	8
d.tif	1	18	4389.08	87.0933	8.5
d.tif	1	19	4390.77	87.1268	9
d.tif	1	20	4388.91	87.0898	9.5
d.tif	1	21	4383.21	86.9766	10
d.tif	1	22	4393.13	87.1736	10.5
d.tif	1	23	4395.01	87.2109	11
d.tif	1	24	4394.8	87.2067	11.5
d.tif	1	25	4399.89	87.3076	12
d.tif	1	26	4407.98	87.4682	12.5
d.tif	1	27	4411.9	87.546	13
d.tif	1	28	4408.51	87.4787	13.5
d.tif	1	29	4411.53	87.5386	14
d.tif	1	30	4417.12	87.6495	14.5
b AP.tif	2	1	2190.06	100	0
b AP.tif	2	2	2202.09	100.55	0.5
b AP.tif	2	3	2214.96	101.137	1
b AP.tif	2	4	2201.18	100.508	1.5
b AP.tif	2	5	2220.31	101.381	2
b AP.tif	2	6	2226.51	101.665	2.5
b AP.tif	2	7	2197.8	100.354	3
b AP.tif	2	8	2186.37	99.8319	3.5
d.tif	2	10	2158.78	98.5718	4.5
d.tif	2	11	2170.24	99.095	5
d.tif	2	12	2188.5	99.9289	5.5
d.tif	2	13	2192.38	100.106	6
d.tif	2	14	2194.45	100.201	6.5
d.tif	2	15	2200.2	100.463	7
d.tif	2	16	2207.39	100.791	7.5
d.tif	2	17	2208.1	100.824	8
d.tif	2	18	2204.41	100.655	8.5
d.tif	2	19	2202.99	100.591	9
d.tif	2	20	2200.85	100.493	9.5
d.tif	2	21	2206.77	100.763	10
d.tif	2	22	2209.79	100.901	10.5
d.tif	2	23	2214.03	101.095	11
d.tif	2	24	2214.76	101.128	11.5
d.tif	2	25	2220.59	101.394	12
d.tif	2	26	2219.35	101.338	12.5
d.tif	2	27	2217.57	101.257	13
d.tif	2	28	2221.26	101.425	13.5
d.tif	2	29	2218.22	101.286	14
d.tif	2	30	2224.11	101.555	14.5
b AP.tif	3	1	1777.97	100	0
b AP.tif	3	2	1797.58	101.103	0.5
b AP.tif	3	3	1789.76	100.663	1
b AP.tif	3	4	1801.13	101.302	1.5
b AP.tif	3	5	1795.24	100.971	2
b AP.tif	3	6	1797.97	101.125	2.5
b AP.tif	3	7	1801.35	101.315	3
b AP.tif	3	8	1790.91	100.728	3.5
d.tif	3	10	1790.93	100.728	4.5
d.tif	3	11	1804.01	101.465	5
d.tif	3	12	1815.38	102.104	5.5
d.tif	3	13	1819.83	102.354	6
d.tif	3	14	1824.37	102.609	6.5
d.tif	3	15	1837.83	103.367	7
d.tif	3	16	1831.37	103.003	7.5
d.tif	3	17	1828.91	102.865	8
d.tif	3	18	1834.15	103.16	8.5
d.tif	3	19	1838.24	103.39	9
d.tif	3	20	1832.21	103.05	9.5
d.tif	3	21	1838.47	103.402	10
d.tif	3	22	1833.48	103.122	10.5
d.tif	3	23	1836.93	103.316	11
d.tif	3	24	1836.52	103.293	11.5
d.tif	3	25	1842.07	103.605	12
d.tif	3	26	1844.41	103.736	12.5
d.tif	3	27	1847.71	103.922	13
d.tif	3	28	1846.27	103.841	13.5
d.tif	3	29	1856.79	104.433	14
d.tif	3	30	1848.86	103.987	14.5
b AP.tif	4	1	1706.14	100	0
b AP.tif	4	2	1718.41	100.719	0.5
b AP.tif	4	3	1713.06	100.406	1
b AP.tif	4	4	1704	99.8748	1.5
b AP.tif	4	5	1697.4	99.4878	2
b AP.tif	4	6	1718.43	100.721	2.5
b AP.tif	4	7	1699.04	99.5842	3
b AP.tif	4	8	1712.93	100.398	3.5
d.tif	4	10	1656.52	97.092	4.5
d.tif	4	11	1665.62	97.6253	5
d.tif	4	12	1672.68	98.0388	5.5
d.tif	4	13	1681.52	98.5574	6
d.tif	4	14	1679.91	98.4629	6.5
d.tif	4	15	1684.76	98.7468	7
d.tif	4	16	1682.27	98.6013	7.5
d.tif	4	17	1692.61	99.2074	8
d.tif	4	18	1687.17	98.888	8.5
d.tif	4	19	1695.31	99.3655	9
d.tif	4	20	1686.12	98.8265	9.5
d.tif	4	21	1693.13	99.2377	10
d.tif	4	22	1685.03	98.7626	10.5
d.tif	4	23	1688.55	98.9693	11
d.tif	4	24	1691.91	99.1662	11.5
d.tif	4	25	1691.68	99.1524	12
d.tif	4	26	1693.21	99.2424	12.5
d.tif	4	27	1695.97	99.404	13
d.tif	4	28	1692.73	99.2144	13.5
d.tif	4	29	1694.08	99.2931	14
d.tif	4	30	1706.75	100.036	14.5
b AP.tif	5	1	1589.28	100	0
b AP.tif	5	2	1599.3	100.63	0.5
b AP.tif	5	3	1588.12	99.9269	1
b AP.tif	5	4	1605.05	100.992	1.5
b AP.tif	5	5	1591.2	100.121	2
b AP.tif	5	6	1607.17	101.126	2.5
b AP.tif	5	7	1601.33	100.758	3
b AP.tif	5	8	1594.43	100.324	3.5
d.tif	5	10	1712.64	107.762	4.5
d.tif	5	11	1733.86	109.097	5
d.tif	5	12	1738.82	109.409	5.5
d.tif	5	13	1741.5	109.578	6
d.tif	5	14	1738.38	109.381	6.5
d.tif	5	15	1756.33	110.511	7
d.tif	5	16	1753.91	110.359	7.5
d.tif	5	17	1748.38	110.01	8
d.tif	5	18	1750.81	110.164	8.5
d.tif	5	19	1757.75	110.6	9
d.tif	5	20	1749.54	110.083	9.5
d.tif	5	21	1756.88	110.546	10
d.tif	5	22	1760.93	110.8	10.5
d.tif	5	23	1766.84	111.172	11
d.tif	5	24	1764.59	111.03	11.5
d.tif	5	25	1764.02	110.995	12
d.tif	5	26	1770.65	111.412	12.5
d.tif	5	27	1771.3	111.453	13
d.tif	5	28	1775.22	111.699	13.5
d.tif	5	29	1767.6	111.22	14
d.tif	5	30	1759.82	110.731	14.5
b AP.tif	6	1	1616.63	100	0
b AP.tif	6	2	1625.1	100.523	0.5
b AP.tif	6	3	1630.79	100.876	1
b AP.tif	6	4	1616.93	100.018	1.5
b AP.tif	6	5	1614.03	99.8389	2
b AP.tif	6	6	1628.52	100.735	2.5
b AP.tif	6	7	1628.15	100.713	3
b AP.tif	6	8	1617.68	100.065	3.5
d.tif	6	10	1636.02	101.199	4.5
d.tif	6	11	1645.04	101.757	5
d.tif	6	12	1658.4	102.583	5.5
d.tif	6	13	1657.15	102.506	6
d.tif	6	14	1656.26	102.451	6.5
d.tif	6	15	1664.82	102.981	7
d.tif	6	16	1678.49	103.826	7.5
d.tif	6	17	1672.3	103.444	8
d.tif	6	18	1678.18	103.807	8.5
d.tif	6	19	1666.53	103.087	9
d.tif	6	20	1671.18	103.374	9.5
d.tif	6	21	1669.53	103.272	10
d.tif	6	22	1666.55	103.088	10.5
d.tif	6	23	1664.89	102.985	11
d.tif	6	24	1674.92	103.605	11.5
d.tif	6	25	1671.42	103.389	12
d.tif	6	26	1670.58	103.337	12.5
d.tif	6	27	1674.45	103.577	13
d.tif	6	28	1677.41	103.76	13.5
d.tif	6	29	1678.51	103.828	14
d.tif	6	30	1678.2	103.809	14.5
b AP.tif	7	1	1559.82	100	0
b AP.tif	7	2	1570.77	100.702	0.5
b AP.tif	7	3	1574.78	100.959	1
b AP.tif	7	4	1576.44	101.066	1.5
b AP.tif	7	5	1561.23	100.091	2
b AP.tif	7	6	1577.97	101.164	2.5
b AP.tif	7	7	1572.18	100.793	3
b AP.tif	7	8	1569.62	100.628	3.5
d.tif	7	10	1640.43	105.168	4.5
d.tif	7	11	1670.24	107.079	5
d.tif	7	12	1666.96	106.869	5.5
d.tif	7	13	1670.16	107.074	6
d.tif	7	14	1676.4	107.474	6.5
d.tif	7	15	1686.75	108.138	7
d.tif	7	16	1685.57	108.062	7.5
d.tif	7	17	1683.41	107.924	8
d.tif	7	18	1685.8	108.077	8.5
d.tif	7	19	1686.89	108.147	9
d.tif	7	20	1689.67	108.325	9.5
d.tif	7	21	1684.35	107.984	10
d.tif	7	22	1687.57	108.19	10.5
d.tif	7	23	1685.39	108.051	11
d.tif	7	24	1701.85	109.106	11.5
d.tif	7	25	1696.57	108.767	12
d.tif	7	26	1697.25	108.811	12.5
d.tif	7	27	1697.74	108.842	13
d.tif	7	28	1702.13	109.123	13.5
d.tif	7	29	1703.25	109.196	14
d.tif	7	30	1703.21	109.193	14.5
b AP.tif	8	1	2542.82	100	0
b AP.tif	8	2	2567.44	100.968	0.5
b AP.tif	8	3	2547.42	100.181	1
b AP.tif	8	4	2552.5	100.38	1.5
b AP.tif	8	5	2542.73	99.9963	2
b AP.tif	8	6	2540.85	99.9225	2.5
b AP.tif	8	7	2548.79	100.235	3
b AP.tif	8	8	2527.06	99.3802	3.5
d.tif	8	10	2483.45	97.6652	4.5
d.tif	8	11	2497.81	98.2299	5
d.tif	8	12	2517.31	98.9965	5.5
d.tif	8	13	2522.4	99.1967	6
d.tif	8	14	2516.71	98.9729	6.5
d.tif	8	15	2530.59	99.5187	7
d.tif	8	16	2528.85	99.4506	7.5
d.tif	8	17	2528.37	99.4317	8
d.tif	8	18	2532.68	99.6011	8.5
d.tif	8	19	2540.69	99.9163	9
d.tif	8	20	2542.66	99.9936	9.5
d.tif	8	21	2539.32	99.8621	10
d.tif	8	22	2539.58	99.8725	10.5
d.tif	8	23	2540.92	99.9251	11
d.tif	8	24	2545.33	100.099	11.5
d.tif	8	25	2544.22	100.055	12
d.tif	8	26	2534.8	99.6843	12.5
d.tif	8	27	2540.23	99.8981	13
d.tif	8	28	2551.87	100.356	13.5
d.tif	8	29	2541.11	99.9327	14
d.tif	8	30	2541.06	99.9305	14.5
b AP.tif	9	1	1596.89	100	0
b AP.tif	9	2	1610.84	100.874	0.5
b AP.tif	9	3	1601.4	100.283	1
b AP.tif	9	4	1615.62	101.173	1.5
b AP.tif	9	5	1607.85	100.687	2
b AP.tif	9	6	1606.93	100.629	2.5
b AP.tif	9	7	1612.94	101.005	3
b AP.tif	9	8	1585.39	99.2799	3.5
d.tif	9	10	1525.94	95.5571	4.5
d.tif	9	11	1548.12	96.9461	5
d.tif	9	12	1556.22	97.4531	5.5
d.tif	9	13	1560.31	97.7095	6
d.tif	9	14	1559.68	97.6703	6.5
d.tif	9	15	1562.44	97.8428	7
d.tif	9	16	1569.66	98.295	7.5
d.tif	9	17	1567.24	98.1435	8
d.tif	9	18	1565.99	98.065	8.5
d.tif	9	19	1575.97	98.6903	9
d.tif	9	20	1567.8	98.1783	9.5
d.tif	9	21	1579.52	98.9123	10
d.tif	9	22	1573.25	98.52	10.5
d.tif	9	23	1576.68	98.7346	11
d.tif	9	24	1576.13	98.7001	11.5
d.tif	9	25	1573.5	98.5357	12
d.tif	9	26	1568.4	98.2161	12.5
d.tif	9	27	1575.51	98.6613	13
d.tif	9	28	1588.47	99.4731	13.5
d.tif	9	29	1579.93	98.9384	14
d.tif	9	30	1583.21	99.1436	14.5
b AP.tif	10	1	1218.79	100	0
b AP.tif	10	2	1231.34	101.03	0.5
b AP.tif	10	3	1212.23	99.4616	1
b AP.tif	10	4	1223.24	100.365	1.5
b AP.tif	10	5	1207.21	99.05	2
b AP.tif	10	6	1225.43	100.544	2.5
b AP.tif	10	7	1220.1	100.107	3
b AP.tif	10	8	1212.75	99.5044	3.5
d.tif	10	10	1275.96	104.69	4.5
d.tif	10	11	1278.53	104.902	5
d.tif	10	12	1272.81	104.432	5.5
d.tif	10	13	1276.46	104.732	6
d.tif	10	14	1277.42	104.81	6.5
d.tif	10	15	1277.5	104.817	7
d.tif	10	16	1277.98	104.856	7.5
d.tif	10	17	1289.52	105.803	8
d.tif	10	18	1277.62	104.826	8.5
d.tif	10	19	1279.24	104.96	9
d.tif	10	20	1278.49	104.898	9.5
d.tif	10	21	1282.84	105.255	10
d.tif	10	22	1283.18	105.283	10.5
d.tif	10	23	1282.72	105.245	11
d.tif	10	24	1289.65	105.814	11.5
d.tif	10	25	1287.54	105.64	12
d.tif	10	26	1287.8	105.662	12.5
d.tif	10	27	1292.34	106.034	13
d.tif	10	28	1279.31	104.965	13.5
d.tif	10	29	1288.45	105.715	14
d.tif	10	30	1289.29	105.784	14.5
b AP.tif	13	1	2437.21	100	0
b AP.tif	13	2	2452.4	100.623	0.5
b AP.tif	13	3	2451.22	100.575	1
b AP.tif	13	4	2457.44	100.83	1.5
b AP.tif	13	5	2459.81	100.927	2
b AP.tif	13	6	2466.79	101.214	2.5
b AP.tif	13	7	2463.56	101.081	3
b AP.tif	13	8	2421.56	99.3578	3.5
d.tif	13	10	2266.09	92.9788	4.5
d.tif	13	11	2291.9	94.038	5
d.tif	13	12	2293.5	94.1034	5.5
d.tif	13	13	2288.38	93.8936	6
d.tif	13	14	2295.58	94.1887	6.5
d.tif	13	15	2299.02	94.3298	7
d.tif	13	16	2302.09	94.4559	7.5
d.tif	13	17	2300.72	94.3995	8
d.tif	13	18	2301.71	94.4403	8.5
d.tif	13	19	2306.45	94.6349	9
d.tif	13	20	2298.89	94.3248	9.5
d.tif	13	21	2314.61	94.9698	10
d.tif	13	22	2301.92	94.4492	10.5
d.tif	13	23	2310.07	94.7836	11
d.tif	13	24	2304.18	94.5418	11.5
d.tif	13	25	2303.85	94.5282	12
d.tif	13	26	2298.42	94.3055	12.5
d.tif	13	27	2302.87	94.488	13
d.tif	13	28	2301.78	94.4434	13.5
d.tif	13	29	2283.3	93.685	14
d.tif	13	30	2293.57	94.1064	14.5
b AP.tif	14	1	1917.58	100	0
b AP.tif	14	2	1934.52	100.884	0.5
b AP.tif	14	3	1921.11	100.184	1
b AP.tif	14	4	1921.38	100.198	1.5
b AP.tif	14	5	1926.85	100.484	2
b AP.tif	14	6	1932.26	100.766	2.5
b AP.tif	14	7	1928.17	100.553	3
b AP.tif	14	8	1932.67	100.787	3.5
d.tif	14	10	1808.93	94.3342	4.5
d.tif	14	11	1833.23	95.6012	5
d.tif	14	12	1836.87	95.7915	5.5
d.tif	14	13	1831.01	95.4859	6
d.tif	14	14	1844.79	96.204	6.5
d.tif	14	15	1844.69	96.1989	7
d.tif	14	16	1841.84	96.0505	7.5
d.tif	14	17	1846.66	96.3019	8
d.tif	14	18	1847.56	96.3485	8.5
d.tif	14	19	1846.51	96.2938	9
d.tif	14	20	1847.18	96.3291	9.5
d.tif	14	21	1843.66	96.1454	10
d.tif	14	22	1849.19	96.4339	10.5
d.tif	14	23	1844.27	96.1773	11
d.tif	14	24	1849.4	96.4447	11.5
d.tif	14	25	1848.17	96.3803	12
d.tif	14	26	1850.13	96.4826	12.5
d.tif	14	27	1848.42	96.3934	13
d.tif	14	28	1848.32	96.3885	13.5
d.tif	14	29	1850.23	96.4879	14
d.tif	14	30	1851.07	96.532	14.5
b AP.tif	15	1	2833.4	100	0
b AP.tif	15	2	2860.51	100.957	0.5
b AP.tif	15	3	2864.76	101.107	1
b AP.tif	15	4	2872.99	101.398	1.5
b AP.tif	15	5	2852.4	100.671	2
b AP.tif	15	6	2864.41	101.095	2.5
b AP.tif	15	7	2846.45	100.461	3
b AP.tif	15	8	2842.82	100.333	3.5
d.tif	15	10	2610.44	92.131	4.5
d.tif	15	11	2635.57	93.0179	5
d.tif	15	12	2634.03	92.9639	5.5
d.tif	15	13	2636.54	93.0524	6
d.tif	15	14	2636.58	93.0539	6.5
d.tif	15	15	2643.86	93.3105	7
d.tif	15	16	2643.05	93.282	7.5
d.tif	15	17	2641.52	93.2281	8
d.tif	15	18	2640.65	93.1973	8.5
d.tif	15	19	2646.53	93.4048	9
d.tif	15	20	2638.76	93.1308	9.5
d.tif	15	21	2648.27	93.4663	10
d.tif	15	22	2645.83	93.3801	10.5
d.tif	15	23	2654.69	93.693	11
d.tif	15	24	2652.26	93.6073	11.5
d.tif	15	25	2650.9	93.5591	12
d.tif	15	26	2651.86	93.5931	12.5
d.tif	15	27	2655.98	93.7383	13
d.tif	15	28	2643.57	93.3005	13.5
d.tif	15	29	2647.64	93.4441	14
d.tif	15	30	2656.64	93.7616	14.5
b AP.tif	16	1	1428.94	100	0
b AP.tif	16	2	1427.83	99.9225	0.5
b AP.tif	16	3	1436.77	100.548	1
b AP.tif	16	4	1423.83	99.6425	1.5
b AP.tif	16	5	1427.75	99.9168	2
b AP.tif	16	6	1433.45	100.316	2.5
b AP.tif	16	7	1440.35	100.799	3
b AP.tif	16	8	1411.05	98.7478	3.5
d.tif	16	10	1277.42	89.3967	4.5
d.tif	16	11	1281.88	89.7085	5
d.tif	16	12	1287.08	90.0727	5.5
d.tif	16	13	1289.01	90.2076	6
d.tif	16	14	1292.14	90.4263	6.5
d.tif	16	15	1293.84	90.5454	7
d.tif	16	16	1293.13	90.4959	7.5
d.tif	16	17	1292.03	90.419	8
d.tif	16	18	1290.97	90.3445	8.5
d.tif	16	19	1291.43	90.3767	9
d.tif	16	20	1290.78	90.331	9.5
d.tif	16	21	1288.43	90.1669	10
d.tif	16	22	1292.25	90.4345	10.5
d.tif	16	23	1290.98	90.3453	11
d.tif	16	24	1287.01	90.0672	11.5
d.tif	16	25	1293.76	90.5397	12
d.tif	16	26	1288.34	90.1604	12.5
d.tif	16	27	1292.23	90.4325	13
d.tif	16	28	1288.41	90.1655	13.5
d.tif	16	29	1291.54	90.3843	14
d.tif	16	30	1294.66	90.6027	14.5
b AP.tif	17	1	2169.72	100	0
b AP.tif	17	2	2199.37	101.367	0.5
b AP.tif	17	3	2192.84	101.066	1
b AP.tif	17	4	2183.3	100.626	1.5
b AP.tif	17	5	2189.62	100.917	2
b AP.tif	17	6	2190.85	100.974	2.5
b AP.tif	17	7	2192.65	101.057	3
b AP.tif	17	8	2175.03	100.245	3.5
d.tif	17	10	2051.65	94.5584	4.5
d.tif	17	11	2070.08	95.408	5
d.tif	17	12	2075.42	95.6539	5.5
d.tif	17	13	2076.04	95.6824	6
d.tif	17	14	2082.36	95.9739	6.5
d.tif	17	15	2082.09	95.9614	7
d.tif	17	16	2077.77	95.7623	7.5
d.tif	17	17	2080.86	95.9045	8
d.tif	17	18	2078.22	95.7829	8.5
d.tif	17	19	2083.91	96.0452	9
d.tif	17	20	2086.93	96.1846	9.5
d.tif	17	21	2085.58	96.1221	10
d.tif	17	22	2087.97	96.2324	10.5
d.tif	17	23	2087.17	96.1956	11
d.tif	17	24	2085.55	96.121	11.5
d.tif	17	25	2084.07	96.0526	12
d.tif	17	26	2083.09	96.0073	12.5
d.tif	17	27	2095.49	96.5791	13
d.tif	17	28	2091.62	96.4004	13.5
d.tif	17	29	2091.94	96.4152	14
d.tif	17	30	2087.6	96.2154	14.5
b AP.tif	18	1	1392.94	100	0
b AP.tif	18	2	1395.2	100.162	0.5
b AP.tif	18	3	1397.42	100.322	1
b AP.tif	18	4	1388.95	99.7131	1.5
b AP.tif	18	5	1396.34	100.244	2
b AP.tif	18	6	1404.9	100.858	2.5
b AP.tif	18	7	1390.97	99.8586	3
b AP.tif	18	8	1393.86	100.066	3.5
d.tif	18	10	1398	100.363	4.5
d.tif	18	11	1418.59	101.841	5
d.tif	18	12	1418.23	101.815	5.5
d.tif	18	13	1424.24	102.247	6
d.tif	18	14	1424.23	102.246	6.5
d.tif	18	15	1430.95	102.729	7
d.tif	18	16	1424.74	102.283	7.5
d.tif	18	17	1423.02	102.159	8
d.tif	18	18	1429.27	102.608	8.5
d.tif	18	19	1434.58	102.989	9
d.tif	18	20	1429.3	102.61	9.5
d.tif	18	21	1428.98	102.587	10
d.tif	18	22	1426.24	102.39	10.5
d.tif	18	23	1428.77	102.572	11
d.tif	18	24	1434.31	102.97	11.5
d.tif	18	25	1433.54	102.915	12
d.tif	18	26	1429.9	102.653	12.5
d.tif	18	27	1427.73	102.498	13
d.tif	18	28	1429.67	102.637	13.5
d.tif	18	29	1432.89	102.868	14
d.tif	18	30	1435.02	103.021	14.5
b AP.tif	19	1	1340.41	100	0
b AP.tif	19	2	1340.81	100.03	0.5
b AP.tif	19	3	1333.66	99.4963	1
b AP.tif	19	4	1344.77	100.325	1.5
b AP.tif	19	5	1342.43	100.15	2
b AP.tif	19	6	1347.49	100.528	2.5
b AP.tif	19	7	1337.31	99.769	3
b AP.tif	19	8	1328.42	99.1059	3.5
d.tif	19	10	1355.31	101.111	4.5
d.tif	19	11	1368.59	102.102	5
d.tif	19	12	1377.85	102.794	5.5
d.tif	19	13	1378.44	102.838	6
d.tif	19	14	1380.05	102.957	6.5
d.tif	19	15	1388.94	103.621	7
d.tif	19	16	1378.73	102.859	7.5
d.tif	19	17	1382.79	103.162	8
d.tif	19	18	1379.41	102.91	8.5
d.tif	19	19	1390.26	103.719	9
d.tif	19	20	1388.49	103.587	9.5
d.tif	19	21	1387.99	103.55	10
d.tif	19	22	1392.2	103.864	10.5
d.tif	19	23	1392	103.849	11
d.tif	19	24	1393.8	103.983	11.5
d.tif	19	25	1397.14	104.232	12
d.tif	19	26	1393.55	103.965	12.5
d.tif	19	27	1397.52	104.261	13
d.tif	19	28	1399.13	104.381	13.5
d.tif	19	29	1393.01	103.924	14
d.tif	19	30	1400.46	104.48	14.5
b AP.tif	20	1	1290.39	100	0
b AP.tif	20	2	1302.83	100.964	0.5
b AP.tif	20	3	1298.24	100.609	1
b AP.tif	20	4	1288.13	99.8248	1.5
b AP.tif	20	5	1300.64	100.795	2
b AP.tif	20	6	1315.76	101.966	2.5
b AP.tif	20	7	1302.05	100.904	3
b AP.tif	20	8	1296.69	100.489	3.5
d.tif	20	10	1269.4	98.3733	4.5
d.tif	20	11	1271.8	98.5594	5
d.tif	20	12	1271.61	98.5449	5.5
d.tif	20	13	1284.11	99.5133	6
d.tif	20	14	1280.52	99.2357	6.5
d.tif	20	15	1288.84	99.8798	7
d.tif	20	16	1284.75	99.5632	7.5
d.tif	20	17	1285.38	99.6119	8
d.tif	20	18	1292	100.125	8.5
d.tif	20	19	1292.24	100.143	9
d.tif	20	20	1292.25	100.144	9.5
d.tif	20	21	1292.95	100.199	10
d.tif	20	22	1292.35	100.152	10.5
d.tif	20	23	1294.12	100.29	11
d.tif	20	24	1300.16	100.758	11.5
d.tif	20	25	1295.08	100.363	12
d.tif	20	26	1295.03	100.36	12.5
d.tif	20	27	1299.06	100.672	13
d.tif	20	28	1293.48	100.24	13.5
d.tif	20	29	1298.28	100.612	14
d.tif	20	30	1293.63	100.252	14.5
b AP.tif	21	1	1715.88	100	0
b AP.tif	21	2	1734.39	101.078	0.5
b AP.tif	21	3	1730.36	100.844	1
b AP.tif	21	4	1731.95	100.936	1.5
b AP.tif	21	5	1745.99	101.755	2
b AP.tif	21	6	1738.26	101.304	2.5
b AP.tif	21	7	1727.08	100.653	3
b AP.tif	21	8	1724.5	100.502	3.5
d.tif	21	10	1738.11	101.295	4.5
d.tif	21	11	1755.37	102.301	5
d.tif	21	12	1758.52	102.485	5.5
d.tif	21	13	1775.33	103.465	6
d.tif	21	14	1773.35	103.349	6.5
d.tif	21	15	1774.37	103.408	7
d.tif	21	16	1772.96	103.326	7.5
d.tif	21	17	1774.58	103.421	8
d.tif	21	18	1768.97	103.094	8.5
d.tif	21	19	1790.76	104.364	9
d.tif	21	20	1782.15	103.862	9.5
d.tif	21	21	1782.76	103.898	10
d.tif	21	22	1785.58	104.062	10.5
d.tif	21	23	1786.95	104.142	11
d.tif	21	24	1777.97	103.618	11.5
d.tif	21	25	1778.4	103.644	12
d.tif	21	26	1781.54	103.826	12.5
d.tif	21	27	1779.93	103.733	13
d.tif	21	28	1786.31	104.104	13.5
d.tif	21	29	1790.65	104.358	14
d.tif	21	30	1780.85	103.787	14.5
b AP.tif	22	1	1916.9	100	0
b AP.tif	22	2	1937.19	101.058	0.5
b AP.tif	22	3	1935.38	100.964	1
b AP.tif	22	4	1943.37	101.381	1.5
b AP.tif	22	5	1943.18	101.371	2
b AP.tif	22	6	1946.58	101.548	2.5
b AP.tif	22	7	1941.63	101.29	3
b AP.tif	22	8	1927.66	100.561	3.5
d.tif	22	10	1859.07	96.9829	4.5
d.tif	22	11	1869.67	97.5359	5
d.tif	22	12	1872.51	97.6842	5.5
d.tif	22	13	1876.87	97.9117	6
d.tif	22	14	1876.45	97.8895	6.5
d.tif	22	15	1875.88	97.8599	7
d.tif	22	16	1876.2	97.8764	7.5
d.tif	22	17	1881.99	98.1788	8
d.tif	22	18	1881.12	98.1335	8.5
d.tif	22	19	1883.35	98.2497	9
d.tif	22	20	1875.33	97.831	9.5
d.tif	22	21	1881.16	98.1351	10
d.tif	22	22	1882.34	98.1971	10.5
d.tif	22	23	1877.41	97.9399	11
d.tif	22	24	1878.26	97.9841	11.5
d.tif	22	25	1881.91	98.1745	12
d.tif	22	26	1882.93	98.2277	12.5
d.tif	22	27	1877.78	97.959	13
d.tif	22	28	1884.2	98.2938	13.5
d.tif	22	29	1880.05	98.0777	14
d.tif	22	30	1874.11	97.7677	14.5
b AP.tif	23	1	3172.02	100	0
b AP.tif	23	2	3210.15	101.202	0.5
b AP.tif	23	3	3216.14	101.391	1
b AP.tif	23	4	3183.18	100.352	1.5
b AP.tif	23	5	3196.7	100.778	2
b AP.tif	23	6	3212.51	101.276	2.5
b AP.tif	23	7	3199.42	100.864	3
b AP.tif	23	8	3185.32	100.42	3.5
d.tif	23	10	2948.39	92.9499	4.5
d.tif	23	11	2965.71	93.4962	5
d.tif	23	12	2965.67	93.4948	5.5
d.tif	23	13	2975.4	93.8015	6
d.tif	23	14	2984.69	94.0944	6.5
d.tif	23	15	2978.93	93.9128	7
d.tif	23	16	2989.2	94.2366	7.5
d.tif	23	17	2987.62	94.1867	8
d.tif	23	18	2988.85	94.2255	8.5
d.tif	23	19	2991.19	94.2993	9
d.tif	23	20	2985.05	94.1058	9.5
d.tif	23	21	2996.44	94.4648	10
d.tif	23	22	2993.67	94.3776	10.5
d.tif	23	23	2991.58	94.3117	11
d.tif	23	24	2995.54	94.4365	11.5
d.tif	23	25	2999.61	94.5648	12
d.tif	23	26	2997.56	94.5002	12.5
d.tif	23	27	3004.62	94.7226	13
d.tif	23	28	2997.12	94.4862	13.5
d.tif	23	29	3006.73	94.7893	14
d.tif	23	30	3001.01	94.6089	14.5
b AP.tif	24	1	1162.73	100	0
b AP.tif	24	2	1164.46	100.149	0.5
b AP.tif	24	3	1165.22	100.215	1
b AP.tif	24	4	1173.87	100.958	1.5
b AP.tif	24	5	1168.17	100.468	2
b AP.tif	24	6	1180.55	101.533	2.5
b AP.tif	24	7	1173.86	100.957	3
b AP.tif	24	8	1176.15	101.154	3.5
d.tif	24	10	1289.78	110.927	4.5
d.tif	24	11	1295.9	111.454	5
d.tif	24	12	1294.92	111.369	5.5
d.tif	24	13	1296.78	111.53	6
d.tif	24	14	1292.42	111.155	6.5
d.tif	24	15	1281.55	110.219	7
d.tif	24	16	1289.61	110.913	7.5
d.tif	24	17	1285.72	110.578	8
d.tif	24	18	1301.86	111.966	8.5
d.tif	24	19	1302.97	112.062	9
d.tif	24	20	1309.03	112.583	9.5
d.tif	24	21	1306.46	112.362	10
d.tif	24	22	1302.45	112.017	10.5
d.tif	24	23	1309.81	112.65	11
d.tif	24	24	1308.96	112.577	11.5
d.tif	24	25	1306.24	112.343	12
d.tif	24	26	1305.69	112.296	12.5
d.tif	24	27	1304.93	112.23	13
d.tif	24	28	1306.87	112.397	13.5
d.tif	24	29	1303.03	112.067	14
d.tif	24	30	1304.57	112.199	14.5
b AP.tif	25	1	1599.61	100	0
b AP.tif	25	2	1620.72	101.319	0.5
b AP.tif	25	3	1621.01	101.338	1
b AP.tif	25	4	1612.24	100.789	1.5
b AP.tif	25	5	1619.12	101.219	2
b AP.tif	25	6	1626.27	101.667	2.5
b AP.tif	25	7	1622.67	101.442	3
b AP.tif	25	8	1613.79	100.886	3.5
d.tif	25	10	1615.04	100.965	4.5
d.tif	25	11	1629.88	101.892	5
d.tif	25	12	1631.35	101.984	5.5
d.tif	25	13	1639.11	102.469	6
d.tif	25	14	1637.05	102.34	6.5
d.tif	25	15	1648.38	103.048	7
d.tif	25	16	1643.81	102.763	7.5
d.tif	25	17	1647.35	102.985	8
d.tif	25	18	1645.76	102.885	8.5
d.tif	25	19	1644.97	102.835	9
d.tif	25	20	1639.5	102.493	9.5
d.tif	25	21	1641.76	102.635	10
d.tif	25	22	1644.74	102.821	10.5
d.tif	25	23	1652.87	103.329	11
d.tif	25	24	1644.36	102.797	11.5
d.tif	25	25	1649.05	103.091	12
d.tif	25	26	1651.66	103.254	12.5
d.tif	25	27	1653.59	103.374	13
d.tif	25	28	1654.58	103.436	13.5
d.tif	25	29	1649.29	103.105	14
d.tif	25	30	1658.46	103.679	14.5
b AP.tif	26	1	2105.32	100	0
b AP.tif	26	2	2125.62	100.965	0.5
b AP.tif	26	3	2134	101.362	1
b AP.tif	26	4	2117.55	100.581	1.5
b AP.tif	26	5	2116.75	100.543	2
b AP.tif	26	6	2121.89	100.787	2.5
b AP.tif	26	7	2104.76	99.9734	3
b AP.tif	26	8	2090.91	99.3156	3.5
d.tif	26	10	2126.76	101.018	4.5
d.tif	26	11	2144.7	101.871	5
d.tif	26	12	2151.34	102.186	5.5
d.tif	26	13	2154.72	102.346	6
d.tif	26	14	2161.81	102.683	6.5
d.tif	26	15	2154.77	102.349	7
d.tif	26	16	2155.9	102.403	7.5
d.tif	26	17	2162.43	102.713	8
d.tif	26	18	2156.95	102.453	8.5
d.tif	26	19	2171.27	103.133	9
d.tif	26	20	2172.74	103.203	9.5
d.tif	26	21	2176.36	103.375	10
d.tif	26	22	2180.24	103.559	10.5
d.tif	26	23	2178.51	103.477	11
d.tif	26	24	2181.91	103.638	11.5
d.tif	26	25	2187.19	103.889	12
d.tif	26	26	2183.07	103.693	12.5
d.tif	26	27	2185.62	103.814	13
d.tif	26	28	2183.54	103.715	13.5
d.tif	26	29	2182.92	103.686	14
d.tif	26	30	2183.96	103.735	14.5
b AP.tif	27	1	1440.73	100	0
b AP.tif	27	2	1451.04	100.716	0.5
b AP.tif	27	3	1449.92	100.638	1
b AP.tif	27	4	1445.57	100.336	1.5
b AP.tif	27	5	1452.76	100.835	2
b AP.tif	27	6	1463.4	101.574	2.5
b AP.tif	27	7	1465.22	101.7	3
b AP.tif	27	8	1444.34	100.25	3.5
d.tif	27	10	1660.63	115.263	4.5
d.tif	27	11	1668.22	115.79	5
d.tif	27	12	1661.07	115.294	5.5
d.tif	27	13	1660.2	115.233	6
d.tif	27	14	1666.25	115.653	6.5
d.tif	27	15	1666.75	115.688	7
d.tif	27	16	1663.33	115.451	7.5
d.tif	27	17	1650.28	114.545	8
d.tif	27	18	1663.53	115.464	8.5
d.tif	27	19	1650.78	114.58	9
d.tif	27	20	1653.91	114.797	9.5
d.tif	27	21	1652.53	114.701	10
d.tif	27	22	1659.42	115.179	10.5
d.tif	27	23	1653.11	114.741	11
d.tif	27	24	1655.39	114.899	11.5
d.tif	27	25	1661.48	115.322	12
d.tif	27	26	1652	114.664	12.5
d.tif	27	27	1658.2	115.095	13
d.tif	27	28	1661.1	115.296	13.5
d.tif	27	29	1662.75	115.411	14
d.tif	27	30	1655.31	114.894	14.5
b AP.tif	28	1	1663.17	100	0
b AP.tif	28	2	1664.49	100.08	0.5
b AP.tif	28	3	1673.97	100.65	1
b AP.tif	28	4	1664.36	100.072	1.5
b AP.tif	28	5	1676.79	100.819	2
b AP.tif	28	6	1656.99	99.6283	2.5
b AP.tif	28	7	1653.13	99.3966	3
b AP.tif	28	8	1649.22	99.1614	3.5
d.tif	28	10	1614.4	97.0675	4.5
d.tif	28	11	1620.1	97.4106	5
d.tif	28	12	1622.59	97.5604	5.5
d.tif	28	13	1630.32	98.0251	6
d.tif	28	14	1628.79	97.9332	6.5
d.tif	28	15	1628.99	97.9451	7
d.tif	28	16	1628.06	97.8891	7.5
d.tif	28	17	1631.62	98.103	8
d.tif	28	18	1635.99	98.3658	8.5
d.tif	28	19	1633.66	98.2257	9
d.tif	28	20	1636.68	98.4076	9.5
d.tif	28	21	1634.8	98.2943	10
d.tif	28	22	1645.35	98.9283	10.5
d.tif	28	23	1638.53	98.5184	11
d.tif	28	24	1641.68	98.7082	11.5
d.tif	28	25	1640.89	98.6605	12
d.tif	28	26	1647.35	99.049	12.5
d.tif	28	27	1645.37	98.9298	13
d.tif	28	28	1639.45	98.574	13.5
d.tif	28	29	1640.15	98.6161	14
d.tif	28	30	1645.64	98.9461	14.5
b AP.tif	29	1	1679.01	100	0
b AP.tif	29	2	1688.47	100.563	0.5
b AP.tif	29	3	1682.31	100.197	1
b AP.tif	29	4	1683.69	100.279	1.5
b AP.tif	29	5	1682.97	100.236	2
b AP.tif	29	6	1695.69	100.993	2.5
b AP.tif	29	7	1668.92	99.3989	3
b AP.tif	29	8	1676.23	99.8346	3.5
d.tif	29	10	1833.54	109.204	4.5
d.tif	29	11	1847.6	110.041	5
d.tif	29	12	1851.15	110.253	5.5
d.tif	29	13	1849.1	110.13	6
d.tif	29	14	1855.02	110.483	6.5
d.tif	29	15	1853.49	110.392	7
d.tif	29	16	1860.68	110.82	7.5
d.tif	29	17	1869.2	111.328	8
d.tif	29	18	1867.57	111.23	8.5
d.tif	29	19	1867.62	111.234	9
d.tif	29	20	1866	111.137	9.5
d.tif	29	21	1858	110.66	10
d.tif	29	22	1864.3	111.036	10.5
d.tif	29	23	1869.58	111.35	11
d.tif	29	24	1859.42	110.745	11.5
d.tif	29	25	1860.22	110.793	12
d.tif	29	26	1865.45	111.104	12.5
d.tif	29	27	1865.33	111.097	13
d.tif	29	28	1861.17	110.849	13.5
d.tif	29	29	1871.2	111.447	14
d.tif	29	30	1870.47	111.403	14.5
b AP.tif	30	1	2005.66	100	0
b AP.tif	30	2	2025.3	100.979	0.5
b AP.tif	30	3	2023.48	100.889	1
b AP.tif	30	4	2016.71	100.551	1.5
b AP.tif	30	5	2004.36	99.9352	2
b AP.tif	30	6	2033.01	101.363	2.5
b AP.tif	30	7	2014.98	100.465	3
b AP.tif	30	8	1976.86	98.5641	3.5
d.tif	30	10	1971.32	98.2876	4.5
d.tif	30	11	1993.58	99.3975	5
d.tif	30	12	1992.64	99.351	5.5
d.tif	30	13	1992.96	99.3666	6
d.tif	30	14	2005.97	100.015	6.5
d.tif	30	15	2000.57	99.7464	7
d.tif	30	16	1996.78	99.5574	7.5
d.tif	30	17	2005.69	100.001	8
d.tif	30	18	2000.21	99.7281	8.5
d.tif	30	19	2002	99.8176	9
d.tif	30	20	2000.76	99.7556	9.5
d.tif	30	21	2005.33	99.9837	10
d.tif	30	22	2008.53	100.143	10.5
d.tif	30	23	2012.1	100.321	11
d.tif	30	24	2002.64	99.8494	11.5
d.tif	30	25	2004.63	99.9486	12
d.tif	30	26	2008.56	100.144	12.5
d.tif	30	27	2008.92	100.163	13
d.tif	30	28	2001.28	99.7813	13.5
d.tif	30	29	2003.57	99.8956	14
d.tif	30	30	2009.71	100.202	14.5
b AP.tif	31	1	1806.95	100	0
b AP.tif	31	2	1818.25	100.625	0.5
b AP.tif	31	3	1815.84	100.492	1
b AP.tif	31	4	1821.19	100.788	1.5
b AP.tif	31	5	1811.52	100.253	2
b AP.tif	31	6	1824.74	100.984	2.5
b AP.tif	31	7	1812.66	100.316	3
b AP.tif	31	8	1801.18	99.6807	3.5
d.tif	31	10	1692.28	93.6536	4.5
d.tif	31	11	1708.61	94.5576	5
d.tif	31	12	1710.78	94.6773	5.5
d.tif	31	13	1707.75	94.5097	6
d.tif	31	14	1718.79	95.121	6.5
d.tif	31	15	1720.89	95.2373	7
d.tif	31	16	1724.91	95.4593	7.5
d.tif	31	17	1718.04	95.0791	8
d.tif	31	18	1713.15	94.8088	8.5
d.tif	31	19	1718.56	95.1081	9
d.tif	31	20	1711.85	94.7369	9.5
d.tif	31	21	1719.91	95.1828	10
d.tif	31	22	1724.32	95.4267	10.5
d.tif	31	23	1725.23	95.4774	11
d.tif	31	24	1724.7	95.4481	11.5
d.tif	31	25	1720.81	95.2325	12
d.tif	31	26	1717.06	95.025	12.5
d.tif	31	27	1727.14	95.583	13
d.tif	31	28	1727.85	95.6222	13.5
d.tif	31	29	1729.36	95.7057	14
d.tif	31	30	1735.82	96.0631	14.5
b AP.tif	32	1	4199.02	100	0
b AP.tif	32	2	4238.9	100.95	0.5
b AP.tif	32	3	4224.76	100.613	1
b AP.tif	32	4	4232.04	100.786	1.5
b AP.tif	32	5	4221.49	100.535	2
b AP.tif	32	6	4241.86	101.02	2.5
b AP.tif	32	7	4221.03	100.524	3
b AP.tif	32	8	4194.52	99.893	3.5
d.tif	32	10	3873.18	92.2402	4.5
d.tif	32	11	3900.94	92.9011	5
d.tif	32	12	3915.24	93.2417	5.5
d.tif	32	13	3924.7	93.467	6
d.tif	32	14	3931.14	93.6203	6.5
d.tif	32	15	3935.7	93.7291	7
d.tif	32	16	3932.45	93.6517	7.5
d.tif	32	17	3931.46	93.628	8
d.tif	32	18	3940.35	93.8399	8.5
d.tif	32	19	3945.04	93.9514	9
d.tif	32	20	3949.4	94.0554	9.5
d.tif	32	21	3939.77	93.8259	10
d.tif	32	22	3938.04	93.7848	10.5
d.tif	32	23	3946.25	93.9803	11
d.tif	32	24	3952.77	94.1356	11.5
d.tif	32	25	3956.65	94.2279	12
d.tif	32	26	3957.21	94.2413	12.5
d.tif	32	27	3960.37	94.3165	13
d.tif	32	28	3962.64	94.3707	13.5
d.tif	32	29	3963.49	94.3909	14
d.tif	32	30	3969.25	94.5279	14.5
b AP.tif	33	1	1465.32	100	0
b AP.tif	33	2	1461.63	99.748	0.5
b AP.tif	33	3	1469.53	100.288	1
b AP.tif	33	4	1476.9	100.791	1.5
b AP.tif	33	5	1459.45	99.5997	2
b AP.tif	33	6	1473.31	100.546	2.5
b AP.tif	33	7	1450.89	99.0154	3
b AP.tif	33	8	1472.53	100.492	3.5
d.tif	33	10	1531.45	104.513	4.5
d.tif	33	11	1536.09	104.83	5
d.tif	33	12	1547.74	105.625	5.5
d.tif	33	13	1553.2	105.997	6
d.tif	33	14	1545.06	105.442	6.5
d.tif	33	15	1552.76	105.967	7
d.tif	33	16	1555.54	106.157	7.5
d.tif	33	17	1557.04	106.259	8
d.tif	33	18	1555.36	106.145	8.5
d.tif	33	19	1560.05	106.465	9
d.tif	33	20	1558.51	106.36	9.5
d.tif	33	21	1556.75	106.24	10
d.tif	33	22	1559.62	106.435	10.5
d.tif	33	23	1555.43	106.15	11
d.tif	33	24	1552.28	105.935	11.5
d.tif	33	25	1556.38	106.215	12
d.tif	33	26	1564.99	106.802	12.5
d.tif	33	27	1561.89	106.591	13
d.tif	33	28	1562.64	106.642	13.5
d.tif	33	29	1559.81	106.448	14
d.tif	33	30	1565.55	106.84	14.5
b AP.tif	34	1	4207.38	100	0
b AP.tif	34	2	4233.35	100.617	0.5
b AP.tif	34	3	4233.01	100.609	1
b AP.tif	34	4	4233.02	100.609	1.5
b AP.tif	34	5	4231.91	100.583	2
b AP.tif	34	6	4238.36	100.736	2.5
b AP.tif	34	7	4206.73	99.9846	3
b AP.tif	34	8	4199.46	99.8119	3.5
d.tif	34	10	3886.96	92.3844	4.5
d.tif	34	11	3928.65	93.3752	5
d.tif	34	12	3939.39	93.6304	5.5
d.tif	34	13	3941.11	93.6714	6
d.tif	34	14	3955.62	94.0162	6.5
d.tif	34	15	3958.45	94.0836	7
d.tif	34	16	3964.27	94.2219	7.5
d.tif	34	17	3967.75	94.3046	8
d.tif	34	18	3968.47	94.3216	8.5
d.tif	34	19	3969.71	94.3512	9
d.tif	34	20	3969.06	94.3356	9.5
d.tif	34	21	3976.88	94.5215	10
d.tif	34	22	3976.53	94.5132	10.5
d.tif	34	23	3969.22	94.3396	11
d.tif	34	24	3979.13	94.575	11.5
d.tif	34	25	3973.64	94.4447	12
d.tif	34	26	3975.76	94.495	12.5
d.tif	34	27	3980.31	94.6031	13
d.tif	34	28	3990.53	94.846	13.5
d.tif	34	29	3983.92	94.6889	14
d.tif	34	30	3987.5	94.7739	14.5

## Sheet: int over time
before
big				small				background
b.tif	9200.11	100		b.tif	14201.2	100		b.tif	15181.6	100		1
b.tif	9119.61	99.125		b.tif	14117.8	99.4128		b.tif	15106.8	99.5074		2
b.tif	9140.56	99.3526		b.tif	14142.3	99.5851		b.tif	15109.4	99.5245		3
b.tif	9124.78	99.1811		b.tif	14122.9	99.449		b.tif	15096.4	99.4388		4
b.tif	9130.9	99.2477		b.tif	14136.5	99.5442		b.tif	15095.3	99.432		5
b.tif	9080.86	98.7037		b.tif	14072.4	99.0934		b.tif	15039.5	99.0644		6
b.tif	9101.94	98.9329		b.tif	14101.3	99.2969		b.tif	15049.9	99.1328		7
b.tif	9140.65	99.3536		b.tif	14120.6	99.4327		b.tif	15078.2	99.3194		8
during
d.tif	822.45	100		d.tif	4989.33	100		d.tif	5855.32	100		9
d.tif	768.801	93.4769		d.tif	4912.02	98.4506		d.tif	5752.34	98.2413		10
d.tif	730.406	88.8086		d.tif	4858.61	97.3801		d.tif	5682.2	97.0434		11
d.tif	700.707	85.1975		d.tif	4826.54	96.7374		d.tif	5629.57	96.1444		12
d.tif	677.972	82.4332		d.tif	4790.28	96.0105		d.tif	5598.87	95.6202		13
d.tif	657.501	79.9442		d.tif	4766.78	95.5395		d.tif	5564.16	95.0274		14
d.tif	642.354	78.1025		d.tif	4743	95.0628		d.tif	5533.8	94.5088		15
d.tif	628.434	76.41		d.tif	4717.9	94.5598		d.tif	5507.97	94.0677		16
d.tif	619.059	75.2701		d.tif	4704	94.2813		d.tif	5486.65	93.7036		17
d.tif	610.44	74.2221		d.tif	4689.86	93.9979		d.tif	5468.97	93.4017		18
d.tif	601.253	73.1051		d.tif	4678.01	93.7603		d.tif	5455.62	93.1737		19
d.tif	593.703	72.1871		d.tif	4665.92	93.5181		d.tif	5444.59	92.9853		20
d.tif	587.089	71.3829		d.tif	4656.5	93.3292		d.tif	5433.07	92.7886		21
d.tif	582.297	70.8003		d.tif	4641.16	93.0219		d.tif	5422.54	92.6088		22
d.tif	578.572	70.3474		d.tif	4637.1	92.9403		d.tif	5413.46	92.4536		23
d.tif	572.053	69.5547		d.tif	4630	92.7981		d.tif	5402.25	92.2623		24
d.tif	568.957	69.1783		d.tif	4612.85	92.4544		d.tif	5392.76	92.1		25
d.tif	566.174	68.8399		d.tif	4599.1	92.1788		d.tif	5380.05	91.8831		26
d.tif	562.713	68.4191		d.tif	4592.51	92.0467		d.tif	5373.49	91.771		27
d.tif	559.252	67.9983		d.tif	4587.39	91.944		d.tif	5362.57	91.5845		28
d.tif	557.024	67.7274		d.tif	4579.9	91.794		d.tif	5355.31	91.4606		29

## Sheet: 1
		Vi		Vf		deltaV	deltaV%
1	1	5039.52	9	4286.53	85.0583	752.991	14.9417
2	1	2190.06	9	2158.78	98.5718	31.2782	1.42819
3	1	1777.97	9	1790.93	100.728	-12.9513	-0.728428
4	1	1706.14	9	1656.52	97.092	49.6141	2.90798
5	1	1589.28	9	1712.64	107.762	-123.354	-7.7616
6	1	1616.63	9	1636.02	101.199	-19.3858	-1.19915
7	1	1559.82	9	1640.43	105.168	-80.6124	-5.16807
8	1	2542.82	9	2483.45	97.6652	59.371	2.33485
9	1	1596.89	9	1525.94	95.5571	70.948	4.44289
10	1	1218.79	9	1275.96	104.69	-57.1631	-4.69014
13	1	2437.21	9	2266.09	92.9788	171.122	7.02122
14	1	1917.58	9	1808.93	94.3342	108.646	5.66579
15	1	2833.4	9	2610.44	92.131	222.959	7.86898
16	1	1428.94	9	1277.42	89.3967	151.515	10.6033
17	1	2169.72	9	2051.65	94.5584	118.066	5.44155
18	1	1392.94	9	1398	100.363	-5.05729	-0.363065
19	1	1340.41	9	1355.31	101.111	-14.8972	-1.11139
20	1	1290.39	9	1269.4	98.3733	20.9913	1.62675
21	1	1715.88	9	1738.11	101.295	-22.2232	-1.29515
22	1	1916.9	9	1859.07	96.9829	57.8347	3.01709
23	1	3172.02	9	2948.39	92.9499	223.63	7.0501
24	1	1162.73	9	1289.78	110.927	-127.053	-10.9272
25	1	1599.61	9	1615.04	100.965	-15.4318	-0.964724
26	1	2105.32	9	2126.76	101.018	-21.44	-1.01837
27	1	1440.73	9	1660.63	115.263	-219.901	-15.2632
28	1	1663.17	9	1614.4	97.0675	48.7725	2.93251
29	1	1679.01	9	1833.54	109.204	-154.534	-9.20385
30	1	2005.66	9	1971.32	98.2876	34.345	1.7124
31	1	1806.95	9	1692.28	93.6536	114.676	6.34637
32	1	4199.02	9	3873.18	92.2402	325.835	7.7598
33	1	1465.32	9	1531.45	104.513	-66.1318	-4.51314
34	1	4207.38	9	3886.96	92.3844	320.418	7.61562
							1.14093
							6.39212

## Sheet: average, %
0	100	100	100	100	100	100	100	100	100	100	100	100	100	100	100	100	100	100	100	100	100	100	100	100	100	100	100	100	100	100	100	100		100	5.0243e-15	0		15181.6	100
0.5	100.721	100.55	101.103	100.719	100.63	100.523	100.702	100.968	100.874	101.03	100.623	100.884	100.957	99.9225	101.367	100.162	100.03	100.964	101.078	101.058	101.202	100.149	101.319	100.965	100.716	100.08	100.563	100.979	100.625	100.95	99.748	100.617		100.712	0.400538	0.5		15106.8	99.5074
1	100.577	101.137	100.663	100.406	99.9269	100.876	100.959	100.181	100.283	99.4616	100.575	100.184	101.107	100.548	101.066	100.322	99.4963	100.609	100.844	100.964	101.391	100.215	101.338	101.362	100.638	100.65	100.197	100.889	100.492	100.613	100.288	100.609		100.589	0.466195	1		15109.4	99.5245
1.5	100.847	100.508	101.302	99.8748	100.992	100.018	101.066	100.38	101.173	100.365	100.83	100.198	101.398	99.6425	100.626	99.7131	100.325	99.8248	100.936	101.381	100.352	100.958	100.789	100.581	100.336	100.072	100.279	100.551	100.788	100.786	100.791	100.609		100.572	0.46583	1.5		15096.4	99.4388
2	100.702	101.381	100.971	99.4878	100.121	99.8389	100.091	99.9963	100.687	99.05	100.927	100.484	100.671	99.9168	100.917	100.244	100.15	100.795	101.755	101.371	100.778	100.468	101.219	100.543	100.835	100.819	100.236	99.9352	100.253	100.535	99.5997	100.583		100.48	0.575645	2		15095.3	99.432
2.5	101.025	101.665	101.125	100.721	101.126	100.735	101.164	99.9225	100.629	100.544	101.214	100.766	101.095	100.316	100.974	100.858	100.528	101.966	101.304	101.548	101.276	101.533	101.667	100.787	101.574	99.6283	100.993	101.363	100.984	101.02	100.546	100.736		100.979	0.492387	2.5		15039.5	99.0644
3	100.824	100.354	101.315	99.5842	100.758	100.713	100.793	100.235	101.005	100.107	101.081	100.553	100.461	100.799	101.057	99.8586	99.769	100.904	100.653	101.29	100.864	100.957	101.442	99.9734	101.7	99.3966	99.3989	100.465	100.316	100.524	99.0154	99.9846		100.505	0.629618	3		15049.9	99.1328
3.5	100.255	99.8319	100.728	100.398	100.324	100.065	100.628	99.3802	99.2799	99.5044	99.3578	100.787	100.333	98.7478	100.245	100.066	99.1059	100.489	100.502	100.561	100.42	101.154	100.886	99.3156	100.25	99.1614	99.8346	98.5641	99.6807	99.893	100.492	99.8119		100.002	0.633	3.5		15078.2	99.3194
4.5	85.0583	98.5718	100.728	97.092	107.762	101.199	105.168	97.6652	95.5571	104.69	92.9788	94.3342	92.131	89.3967	94.5584	100.363	101.111	98.3733	101.295	96.9829	92.9499	110.927	100.965	101.018	115.263	97.0675	109.204	98.2876	93.6536	92.2402	104.513	92.3844		98.8591	6.39212	4.5		5855.32	38.5687
5	85.7796	99.095	101.465	97.6253	109.097	101.757	107.079	98.2299	96.9461	104.902	94.038	95.6012	93.0179	89.7085	95.408	101.841	102.102	98.5594	102.301	97.5359	93.4962	111.454	101.892	101.871	115.79	97.4106	110.041	99.3975	94.5576	92.9011	104.83	93.3752		99.6595	6.414	5		5752.34	37.8903
5.5	86.3229	99.9289	102.104	98.0388	109.409	102.583	106.869	98.9965	97.4531	104.432	94.1034	95.7915	92.9639	90.0727	95.6539	101.815	102.794	98.5449	102.485	97.6842	93.4948	111.369	101.984	102.186	115.294	97.5604	110.253	99.351	94.6773	93.2417	105.625	93.6304		99.8973	6.32605	5.5		5682.2	37.4283
6	86.3977	100.106	102.354	98.5574	109.578	102.506	107.074	99.1967	97.7095	104.732	93.8936	95.4859	93.0524	90.2076	95.6824	102.247	102.838	99.5133	103.465	97.9117	93.8015	111.53	102.469	102.346	115.233	98.0251	110.13	99.3666	94.5097	93.467	105.997	93.6714		100.095	6.34833	6		5629.57	37.0816
6.5	86.5736	100.201	102.609	98.4629	109.381	102.451	107.474	98.9729	97.6703	104.81	94.1887	96.204	93.0539	90.4263	95.9739	102.246	102.957	99.2357	103.349	97.8895	94.0944	111.155	102.34	102.683	115.653	97.9332	110.483	100.015	95.121	93.6203	105.442	94.0162		100.209	6.28247	6.5		5598.87	36.8794
7	86.7284	100.463	103.367	98.7468	110.511	102.981	108.138	99.5187	97.8428	104.817	94.3298	96.1989	93.3105	90.5454	95.9614	102.729	103.621	99.8798	103.408	97.8599	93.9128	110.219	103.048	102.349	115.688	97.9451	110.392	99.7464	95.2373	93.7291	105.967	94.0836		100.415	6.32094	7		5564.16	36.6508
7.5	86.9264	100.791	103.003	98.6013	110.359	103.826	108.062	99.4506	98.295	104.856	94.4559	96.0505	93.282	90.4959	95.7623	102.283	102.859	99.5632	103.326	97.8764	94.2366	110.913	102.763	102.403	115.451	97.8891	110.82	99.5574	95.4593	93.6517	106.157	94.2219		100.426	6.31888	7.5		5533.8	36.4508
8	87.1268	100.824	102.865	99.2074	110.01	103.444	107.924	99.4317	98.1435	105.803	94.3995	96.3019	93.2281	90.419	95.9045	102.159	103.162	99.6119	103.421	98.1788	94.1867	110.578	102.985	102.713	114.545	98.103	111.328	100.001	95.0791	93.628	106.259	94.3046		100.477	6.25349	8		5507.97	36.2807
8.5	87.0933	100.655	103.16	98.888	110.164	103.807	108.077	99.6011	98.065	104.826	94.4403	96.3485	93.1973	90.3445	95.7829	102.608	102.91	100.125	103.094	98.1335	94.2255	111.966	102.885	102.453	115.464	98.3658	111.23	99.7281	94.8088	93.8399	106.145	94.3216		100.524	6.38193	8.5		5486.65	36.1402
9	87.1268	100.591	103.39	99.3655	110.6	103.087	108.147	99.9163	98.6903	104.96	94.6349	96.2938	93.4048	90.3767	96.0452	102.989	103.719	100.143	104.364	98.2497	94.2993	112.062	102.835	103.133	114.58	98.2257	111.234	99.8176	95.1081	93.9514	106.465	94.3512		100.692	6.34518	9		5468.97	36.0238
9.5	87.0898	100.493	103.05	98.8265	110.083	103.374	108.325	99.9936	98.1783	104.898	94.3248	96.3291	93.1308	90.331	96.1846	102.61	103.587	100.144	103.862	97.831	94.1058	112.583	102.493	103.203	114.797	98.4076	111.137	99.7556	94.7369	94.0554	106.36	94.3356		100.582	6.39183	9.5		5455.62	35.9359
10	86.9766	100.763	103.402	99.2377	110.546	103.272	107.984	99.8621	98.9123	105.255	94.9698	96.1454	93.4663	90.1669	96.1221	102.587	103.55	100.199	103.898	98.1351	94.4648	112.362	102.635	103.375	114.701	98.2943	110.66	99.9837	95.1828	93.8259	106.24	94.5215		100.678	6.32314	10		5444.59	35.8632
10.5	87.1736	100.901	103.122	98.7626	110.8	103.088	108.19	99.8725	98.52	105.283	94.4492	96.4339	93.3801	90.4345	96.2324	102.39	103.864	100.152	104.062	98.1971	94.3776	112.017	102.821	103.559	115.179	98.9283	111.036	100.143	95.4267	93.7848	106.435	94.5132		100.735	6.36695	10.5		5433.07	35.7873
11	87.2109	101.095	103.316	98.9693	111.172	102.985	108.051	99.9251	98.7346	105.245	94.7836	96.1773	93.693	90.3453	96.1956	102.572	103.849	100.29	104.142	97.9399	94.3117	112.65	103.329	103.477	114.741	98.5184	111.35	100.321	95.4774	93.9803	106.15	94.3396		100.792	6.39131	11		5422.54	35.718
11.5	87.2067	101.128	103.293	99.1662	111.03	103.605	109.106	100.099	98.7001	105.814	94.5418	96.4447	93.6073	90.0672	96.121	102.97	103.983	100.758	103.618	97.9841	94.4365	112.577	102.797	103.638	114.899	98.7082	110.745	99.8494	95.4481	94.1356	105.935	94.575		100.843	6.41122	11.5		5413.46	35.6581
12	87.3076	101.394	103.605	99.1524	110.995	103.389	108.767	100.055	98.5357	105.64	94.5282	96.3803	93.5591	90.5397	96.0526	102.915	104.232	100.363	103.644	98.1745	94.5648	112.343	103.091	103.889	115.322	98.6605	110.793	99.9486	95.2325	94.2279	106.215	94.4447		100.874	6.4066	12		5402.25	35.5843
12.5	87.4682	101.338	103.736	99.2424	111.412	103.337	108.811	99.6843	98.2161	105.662	94.3055	96.4826	93.5931	90.1604	96.0073	102.653	103.965	100.36	103.826	98.2277	94.5002	112.296	103.254	103.693	114.664	99.049	111.104	100.144	95.025	94.2413	106.802	94.495		100.867	6.42825	12.5		5392.76	35.5218
13	87.546	101.257	103.922	99.404	111.453	103.577	108.842	99.8981	98.6613	106.034	94.488	96.3934	93.7383	90.4325	96.5791	102.498	104.261	100.672	103.733	97.959	94.7226	112.23	103.374	103.814	115.095	98.9298	111.097	100.163	95.583	94.3165	106.591	94.6031		100.996	6.3976	13		5380.05	35.4381
13.5	87.4787	101.425	103.841	99.2144	111.699	103.76	109.123	100.356	99.4731	104.965	94.4434	96.3885	93.3005	90.1655	96.4004	102.637	104.381	100.24	104.104	98.2938	94.4862	112.397	103.436	103.715	115.296	98.574	110.849	99.7813	95.6222	94.3707	106.642	94.846		100.991	6.45053	13.5		5373.49	35.3949
14	87.5386	101.286	104.433	99.2931	111.22	103.828	109.196	99.9327	98.9384	105.715	93.685	96.4879	93.4441	90.3843	96.4152	102.868	103.924	100.612	104.358	98.0777	94.7893	112.067	103.105	103.686	115.411	98.6161	111.447	99.8956	95.7057	94.3909	106.448	94.6889		100.996	6.46508	14		5362.57	35.3229
14.5	87.6495	101.555	103.987	100.036	110.731	103.809	109.193	99.9305	99.1436	105.784	94.1064	96.532	93.7616	90.6027	96.2154	103.021	104.48	100.252	103.787	97.7677	94.6089	112.199	103.679	103.735	114.894	98.9461	111.403	100.202	96.0631	94.5279	106.84	94.7739		101.069	6.3675	14.5		5355.31	35.2751
