# Supplementary material for: A mechano-osmotic feedback couples cell volume to the rate of cell deformation
Source: eLife journal article supplement (doi:10.7554/elife.72381), 2022-04-13
Supplement: supp [file LatA_dVdt_dAdt.xlsx]

## Sheet: Sheet1
exp	pos	cell	Vi	t of V loss	deltaV% at t of V loss	A at t of V loss	t of 90	deltaV% at t of 90	deltaS% at t of 90	A at 90	dV/dt i	dA/dt i
20180517	3	5	1595.83	25	13.4423	451.387	9	5.40567	25.3607	315.347	-8.11314	28.3948
20180517	3	6	1524.34	9	1.34923	76.757	39	-5.73687	21.809	252.319	-3.46042	4.20624
20180517	3	7	1353.82				17	-5.82455	13.4706	173.066	2.00162	4.26732
20180517	3	9	1318.11	28	13.7055	217.997	4	5.13697	10.615	195.948	-6.80662	19.1508
20180517	4	1	2605.81	19	7.8608	107.854					-12.7329	4.63391
20180517	4	2	1556.78				31	-1.89618	17.3675	239.422	-1.45066	3.45976
20180517	4	3	2152.55	38	4.59434	392.832	21	4.11962	12.6012	284.457	-5.44982	5.19555
20180517	4	7	1769.16	25	7.89265	104.942	59	-0.676896	15.4639	251.071	-4.47766	3.63817
20180517	4	8	2124.15	31	9.66965	376.919	9	3.97688	4.86835	201.148	-7.21776	7.34845
20180517	4	9	1513.79				31	-0.0340417	9.59398	182.323	-0.929079	2.56285
20180517	4	10	1311.83				28	-12.9113	24.7377	222.677	4.58702	7.20878
20180517	4	12	1648.15	25	5.88682	284.977	23	5.38144	11.2627	233.39	-5.17219	5.93932
20180517	4	13	2080.06	32	7.53629	335.004	22	6.64897	10.0509	268.232	-8.07193	3.28521
20180517	8	5	1566.91	17	5.72729	174.626	16	5.33188	5.08464	174.626	-6.76717	15.2337
20180517	8	5	3262.13				19	-0.00266944	15.7688	385.551	0.657187	9.91447
20180517	11	1	1440.49	42	9.66341	294.754	15	6.07331	11.4854	217.477	-5.23807	9.42123
20180517	11	2	1259.38				7	-0.51861	8.32536	148.209	1.40029	13.0559
20180517	11	7	2699.67	15	1.95188	152.473	59	-5.18567	21.3127	367.35	-4.96158	11.0969
20180517 1	1	1	1578.67	17	2.9455	141.761	24	1.70063	8.0583	182.843	-4.03223	7.32125
20180517 1	1	6	1782.03	36	8.32876	478.116	18	2.17557	13.6166	250.239	-3.8603	5.72811
20180517 1	2	2	1417.5	16	7.18942	125.016	29	6.5352	5.5974	174.002	-7.42376	8.67549
20180517 1	2	3	1977.97				49	-12.8994	28.6974	324.916	21.3152	1.33295
20180517 1	2	4	1305.51	55	7.96646	385.395	27	4.41885	16.4191	227.566	-5.18177	5.31038
20180517 1	2	5	1764.5	13	6.86074	115.343	45	6.79357	4.52608	192.412	-11.8046	4.38234
20180517 1	3	2	1184.67	15	7.79183	115.343	60	-1.95251	18.6385	206.764	-10.2303	5.63501
20180517 1	3	5	1894.03	8	3.86713	121.479	9	3.66829	13.403	265.632	-5.56878	13.3821
20180517 1	3	7	1693.15				17	-3.22467	19.4751	263.448	2.7261	8.33408
20180517 1	4	7	1476.44	8	2.14193	103.382	35	-12.5095	24.5148	240.878	-0.216106	5.27515
20180517 1	6	1	1672.96	55	10.2224	413.945	21	2.71062	15.5564	256.271	-0.768762	2.88735
20180517 1	6	5	1351.05	5	4.00465	40.146	28	-3.85279	11.6936	167.554	-2.322	9.0555
20200526	1	2	1251.81	29	9.68377	282.065	12	4.36677	12.2854	197.092	-4.69065	7.76386
20200526	1	3	1992.17	17	9.04952	384.303	4	1.98951	6.01727	197.092	-12.2584	21
20200526	2	1	1949.74	8	3.78482	169.218	36	-5.5262	12.0814	207.076	-7.70428	7.17711
20200526	2	2	1759.23				15	-2.80593	13.268	221.117	0.0889385	7.41086
20200526	2	3	1209.69	42	6.66191	209.261	9	3.46348	6.41733	148.521	-4.10801	8.68537
20200526	2	7	878.389	13	3.23119	88.925	30	-1.16083	8.48148	114.927	-0.950176	7.18304
20200526	2	8	1691.17				6	1.60221	7.5014	185.235	0.48192	21.6693
20200526	2	9	1801.07	8	3.02003	82.165	20	0.279462	12.5197	233.91	-5.14235	6.30533
20200526	2	11	2216.31				11	-2.01328	9.69383	221.949	11.1359	25.1053
20200526	2	14	1573.6	17	11.6219	501.934	5	-1.24994	10.4643	277.489	-0.914885	37.4769
20200526	2	15	994.679	36	13.3755	286.485	15	6.53938	8.95728	157.673	-4.48739	8.53105
