# Supplementary material for: A mechano-osmotic feedback couples cell volume to the rate of cell deformation
Source: eLife journal article supplement (doi:10.7554/elife.72381), 2022-04-13
Supplement: supp [file LatA_single_cells.xlsx]

## Sheet: V
dV/dt	-4.03223	-3.8603	-7.42376	21.3152	-5.18177	-11.8046	-10.2303	-5.56878	2.7261	-3.4505	-0.768762	-2.322	-8.11314	-3.46042	2.00162	-6.80662	-12.7329	-1.45066	-5.44982	-4.47766	-7.21776	-0.929079	4.73062	-5.17219	-8.07193	-6.76717	0.657187	-5.23807	1.40029	-4.96158		-4.71962	6.23143
position	1	1	2	2	2	2	3	3	3	4	6	6	3	3	3	3	4	4	4	4	4	4	4	4	4	8	8	11	11	11					1	1	2	2	2	2	3	3	3	4	6	6	3	3	3
time (min) / cell	1	6	2	3	4	5	2	5	7	7	1	5	5	6	7	9	1	2	3	7	8	9	10	12	13	5	6	1	2	7					1	6	2	3	4	5	2	5	7	7	1	5	5	6	7
0	1578.67	1782.03	1417.5	1977.97	1305.51	1764.5	1184.67	1894.03	1693.15	1476.44	1672.96	1351.05	1595.83	1524.34	1353.82	1318.11	2605.81	1556.78	2152.55	1769.16	2124.15	1513.79	1311.83	1648.15	2080.06	1566.91	3262.13	1440.49	1259.38	2699.67		1587.25	468.943		100	100	100	100	100	100	100	100	100	100	100	100	100	100	100
1	1571.91	1782.17	1409.29	1977.86	1296.89	1755.28	1212.85	1884.3	1794.51	1471.66	1662.37	1325.04	1590.54	1522.48	1347.03	1293.2	2602.59	1558.22	2146.34	1766.12	2100.84	1511.05	1328.42	1648.3	2053.92	1527.03	3270.23	1431.76	1259.64	2700.78					99.5714	99.7978	99.4214	101.28	99.3396	99.4773	102.379	99.4864	96.5086	99.4442	99.3674	98.0748	99.6688	99.8779	99.4987
2	1588.79	1778.57	1405.45	2003.18	1286.64	1721.81	1168.18	1882.88	1731.86	1481.56	1672.89	1319.6	1563.86	1537.03	1346.91	1275.94	2601.71	1574.1	2162.31	1748.91	2082.66	1517.74	1298.81	1643.42	2068.74	1603.09	3268.75	1412.76	1247.5	2679.35					100.641	98.9264	99.1503	101.837	98.5544	97.5807	98.6078	99.4112	96.2337	98.3831	99.9963	97.6726	97.9965	100.832	99.4893
3	1589.65	1763.04	1394.7	2014.19	1272.31	1706.96	1176.3	1853.76	1726.92	1486.91	1668.44	1312.93	1550.25	1572.19	1341.02	1274.53	2541.19	1585.34	2146.22	1751.53	2071.49	1521.93	1308.67	1638.37	2037.31	1528.27	3247.16	1418.63	1258.14	2698.07					100.696	98.0376	98.3914	102.73	97.457	96.7391	99.2933	97.8742	97.1224	98.4842	99.7302	97.1789	97.1439	103.139	99.0548
4	1559.87	1747.2		2031.84	1277.78	1724.18	1198.77	1859.08	1742.87	1469.56	1666.48	1307.47	1549.07	1524.43	1359.2	1250.4	2529.19	1596.82	2130.94	1747.61	2061.85	1522.94	1316.71	1627.84	2039.55	1537.7	3261.74	1410.81	1266.2	2669.35					98.809	98.5181		103.159	97.876	97.7149	101.19	98.1548	96.5643	98.3164	99.6127	96.7747	97.0701	100.006	100.397
5	1553.62	1755.76	1388.19	2040.34	1261.11	1700.03	1140.6	1843.92	1732.86	1461.39	1679.66	1296.94	1539.34	1529.15	1340.39	1249.04	2553.17	1568.13	2145.8	1739.58	2066.87	1510.41		1628.13	2031.64	1537.19	3258.52	1395.96	1271.12	2666.45					98.4131	97.9861	97.9327	104.05	96.5987	96.3464	96.2798	97.3542	97.9859	99.6265	100.401	95.9954	96.4602	100.315	99.0081
6	1550.93	1746.28	1377.18	2057.96	1248.23	1689.08	1146.55	1835.35	1758.37	1445.79	1685.72	1311.59	1546.32	1512.37	1355.04	1230.36	2525.71	1556.93	2128.23	1744.38	2080.1	1507.04	1331.08	1610.69	2019.04	1512.62	3247.86	1400.95	1273.71	2683.29					98.2428	97.4845	97.1555	106.365	95.6121	95.726	96.7823	96.9018	96.9557	98.6188	100.763	97.0795	96.8974	99.2147	100.09
7	1552.16	1737.34	1363.37	2103.75	1257.74	1675.45	1135.33	1830.98	1739.88	1447.28	1673.98	1314.95	1534.74	1515.16	1336.79	1230.03	2522.31	1551.49	2109.15	1733.43	2036.77	1506.33	1329.45	1604.69	2011.3	1538.07	3258.67	1392.71	1265.91	2667.76					98.3206	97.6706	96.1817	108.199	96.3412	94.9533	95.8349	96.6714	97.8416	99.1311	100.061	97.328	96.1719	99.3977	98.7425
8	1540.71	1740.66	1365.47	2140.02	1274.42	1661.32	1113.72	1820.78	1755.78	1444.81	1668.63	1300.36	1549	1508.8	1363.65	1229.46	2481.48	1548.14	2107.91	1736.09	2045.55	1518.48	1347.67	1597.13	2005.6	1508.38	3279.28	1392.72	1300.21	2651.61					97.5949	98.1465	96.33	109.086	97.6188	94.1526	94.0108	96.1329	97.7443	98.5612	99.7415	96.2484	97.0657	98.9804	100.726
9	1553.29	1749.14	1346.4	2157.56	1257.82	1648.6	1106.18	1824.55	1754.03	1464.07	1665.02	1321.03	1509.57	1503.78	1361.98	1228.24	2500.36	1562.67	2117.97	1731.99	2039.67	1499.91	1353.35	1612.33	2000.03	1509.89	3266.19	1386.79	1260.3	2658.11					98.3923	98.5729	94.9847	110.22	96.3468	93.4319	93.3744	96.3317	98.2369	98.6471	99.5257	97.7784	94.5943	98.6508	100.603
10	1550.49	1756.74	1343.42	2179.99	1241.83	1646.05	1104.45	1870.43	1762.87	1449.26	1650.42	1313.08	1497.79	1505.34	1378.38	1270.03	2487.86	1558.39	2103.36	1713.53	2046.79	1511.25	1355.46	1607.82	1997.98	1489.66	3271.69	1385.59	1253.42	2650.62					98.215	98.9492	94.7741	111.445	95.1225	93.2872	93.2282	98.7541	98.4394	99.888	98.6528	97.1899	93.8566	98.7532	101.814
11	1548.26	1763.45	1337.59	2204.22	1253.6	1652.83	1105.43	1855.98	1766.51	1456.79	1651.45	1309.85	1484.28	1503.3	1378.3	1217.83	2476.75	1564.94	2138.68	1708.92	2035.23	1497.88	1344.79	1589.33	1990	1538.8	3275.84	1388.77	1248.36	2648.76					98.0732	99.7262	94.3631	111.959	96.0236	93.6714	93.3109	97.9912	97.6127	99.0947	98.7147	96.9507	93.0099	98.6195	101.808
12	1537.87	1777.29	1334.59	2214.38	1246.87	1643.44	1104.05	1845.53	1751.67	1448.41	1651.49	1325.85	1477.86	1508.65	1400.23	1215.56	2479.12	1569.81	2088.8	1705.76	2013.66	1503.96	1399.57	1590.94	1995.83	1502.73	3272.44	1380.45	1237.56	2660.26					97.4154	98.5845	94.1513	111.552	95.5081	93.1393	93.1948	97.4396	97.946	99.1813	98.7168	98.1347	92.6075	98.9706	103.428
13	1534.24	1756.95	1326.78	2206.34	1257.37	1630.69	1094.13	1833.48	1757.65	1449.67	1647.13	1336.1	1474.82	1509.2	1419.62	1208.03	2468.99	1550.95	2079.6	1704.34	2025.43	1505.12	1363.67	1601.8	1995.38	1500.62	3266.79	1367.13	1303.37	2663.77					97.1852	98.4253	93.6001	112.803	96.3126	92.4165	92.3576	96.8032	97.4731	99.913	98.4563	98.8938	92.417	99.0066	104.86
14	1533.47	1754.11	1324.11	2231.09	1246.67	1634.47	1092.36	1842.28	1749.17	1467.91	1638.84	1336.68	1494.84	1512.82	1414.17	1201.1	2447.11	1571.07	2080.9	1703.17	2010.44	1526.57	1380.11	1590.56	1986.35	1484.12	3250.33	1364.27	1276.58	2636.57					97.1363	98.4661	93.4117	113.363	95.4929	92.6306	92.2082	97.2677	98.0965	100.196	97.9608	98.9363	93.6717	99.2439	104.458
15	1534.02	1754.84	1323.64	2242.15	1263.77	1645.34	1082.63	1843.13	1760.35	1456.25	1634.12	1365.7	1461.94	1518.36	1417.98	1225.31	2448.85	1571.09	2063.79	1702.7	2005.14	1516.45	1383.06	1589.88	1990.94	1491.6	3259.95	1356.01	1274.65	2646.97					97.1715	98.1534	93.3787	112.752	96.803	93.2471	91.3867	97.3128	96.4065	100.616	97.6788	101.085	91.61	99.6077	104.739
16	1533.26	1749.26	1315.59	2230.06	1255.96	1639.19	1096.18	1855	1730.03	1457.52	1636.09	1352.45	1446.46	1510.81	1419.51	1198.78	2447.87	1561.57	2055.84	1695.46	1970.83	1515.15	1378.09	1581.88	1970.66	1483.36	3262.88	1353	1286.17	2655.96					97.123	97.3768	92.8106	112.197	96.2049	92.8981	92.53	97.9394	97.3942	100.832	97.7962	100.104	90.6402	99.1124	104.852
17	1532.17	1735.42	1335.7	2219.09	1259.44	1642.08	1088.51	1844.39	1747.75	1468.28	1633.75	1358.56	1432.51	1514.53	1432.67	1186.8	2444	1557	2080.66	1695.31	1978.05	1534.43	1391.6	1584.02	1996.47	1477.17	3255.34	1347.17	1294.28	2663.18					97.0545	97.8167	94.2296	110.086	96.4708	93.0621	91.8829	97.3795	95.7887	102.376	97.6566	100.556	89.7657	99.3563	105.825
18	1540.54	1743.26	1333.91	2177.34	1267.88	1641.48	1111.38	1857.55	1718.94	1472.43	1636.38	1376.81	1434.71	1527.08	1431.12	1184.83	2434.7	1559.75	2082.07	1708.61	1960.99	1506.75	1392.99	1582.14	1951.9	1488.88	3258.48	1351.68	1286.83	2647.77					97.5842	96.8532	94.1033	109.016	97.1172	93.028	93.8133	98.0741	96.3004	103.746	97.8137	101.907	89.9033	100.18	105.71
19	1547.31	1726.09	1329.88	2156.17	1253.7	1647.74	1114.42	1869.63	1728.12	1478.61	1630.26	1388.38	1438.23	1523.43	1439.81	1174.78	2400.98	1557.23	2065.93	1705.41	1966.46	1502.43	1408.34	1576.71	1946.26	1506.16	3262.22	1355.65	1290.49	2663					98.0131	96.459	93.8191	108.007	96.0312	93.3832	94.0704	98.7118	96.9614	105.076	97.4479	102.763	90.1242	99.9403	106.352
20	1547.39	1719.07	1339.26	2136.21	1257.04	1642.14	1107.48	1848.41	1739.98	1481.78	1627.61	1389.04	1406.19	1526.56	1437.79	1170.71	2408.06	1555.61	2069.1	1709.21	1954.49	1484.3	1420.7	1569.46	2000.14	1488.05	3262.44	1337.02	1291.15	2704.55					98.0182	95.7797	94.4809	107.097	96.287	93.0656	93.4838	97.5916	94.9986	106.138	97.2894	102.812	88.1165	100.145	106.202
21	1541.9	1706.96	1329.26	2118.22	1258.06	1648.29	1112.39	1839.41	1704.76	1504.47	1623.73	1393.94	1399.94	1524.24	1447.69	1151.05	2402.79	1564.57	2063.88	1704.35	1951.55	1485.07	1438.31	1572.57	1951.65	1505.21	3271.91	1336.36	1291.04	2681.32					97.6706	95.3663	93.7752	107.221	96.3651	93.4139	93.8985	97.1161	96.7985	106.69	97.0574	103.175	87.7251	99.9934	106.934
22	1561.52	1699.59	1331.99	2120.69	1260.06	1652.74	1126.04	1862.93	1737.06	1524.6	1622.98	1391.84	1397.1	1530.97	1447.38	1156.6	2405.56	1570.31	2075.83	1709.22	1970.92	1488.85	1438.25	1576.65	1941.76	1504.46	3279.19	1318.72	1291.3	2706.48					98.9136	94.9448	93.9675	107.054	96.5186	93.6662	95.0511	98.3581	95.3477	106.943	97.0125	103.019	87.5469	100.435	106.911
23	1569.01	1692.08	1326.32	2117.37	1255.65	1645.18	1137.73	1864.87	1711.02	1544.15	1615.66	1388.47	1396.87	1542.92	1458.41	1155.82	2408.55	1579.71	2078.25	1707	1938.15	1489.08	1445.22	1559.46	1946.38	1511.24	3278.29	1326.79	1292.27	2713.99					99.3876	95.0645	93.5681	106.185	96.1808	93.2379	96.0375	98.4607	95.0344	108.144	96.5752	102.77	87.5327	101.218	107.726
24	1551.83	1694.22	1312.8	2100.19	1251.09	1654.89	1136.67	1847.57	1705.4	1559.76	1614.22	1395.37	1393.97	1546.38	1464.62	1161.96	2421.15	1567.32	2074.25	1637.1	1945.99	1497.62	1462.03	1555.4	1932.71	1511.09	3284.66	1342.17	1291.8	2718.77					98.2994	94.9438	92.6139	106.601	95.8316	93.788	95.9481	97.5472	95.0226	108.022	96.4893	103.281	87.3508	101.446	108.184
25	1556.25	1692.06	1326.5	2108.41	1248.97	1642.83	1136.34	1869.11	1705.19	1567.88	1606.99	1400	1381.31	1548.59	1438.66	1149.99	2429.28	1565.56	2063.35	1629.52	1927.22	1498.82	1466.88	1551.13	1932.8	1502.83	3293.56	1330.51	1286.56	2784.46					98.5794	93.333	93.5803	106.63	95.6693	93.1049	95.9201	98.6847	95.3765	107.754	96.0572	103.624	86.5577	101.59	106.267
26	1555.04	1663.36	1327.6	2108.99	1241.22	1642.55	1130.46	1860.64	1711.54	1571.59	1609.41	1410.81	1381.74	1550.77	1439.31	1148.66	2427.25	1569.82	2074.34	1645.89	1935.97	1521.07	1464.13	1552.97	1945.53	1512.5	3293.59	1332.7	1302.98	2764.83					98.5026	94.0282	93.6581	106.155	95.0753	93.0889	95.4237	98.2375	94.8034	108.183	96.2017	104.423	86.5845	101.734	106.315
27	1543.53	1675.75	1314.19	2099.6	1247.82	1644.15	1140.58	1866.01	1701.26	1589.24	1605.58	1411.23	1395.92	1563.83	1431.02	1142.46	2437.15	1567.43	2057.91	1647.84	1928.97	1495.78	1476.05	1552.84	1927.24	1501.04	3298.35	1306.27	1296.07	2750.67					97.7738	92.8811	92.7118	106.675	95.5811	93.1795	96.2779	98.521	94.0681	109.219	95.9728	104.455	87.473	102.59	105.702
28	1556.73	1655.3	1324.6	2109.87	1243.22	1648.35	1136.3	1881.52	1688.06	1587.44	1609.48	1403.1	1399.01	1575.4	1428.59	1137.46	2434.29	1568.6	2061.38	1639.51	1930.45	1502.55	1481.2	1558.11	1926.12	1504.35	3296.06	1333.77	1286.33	2775.01					98.6102	93.2616	93.4467	106.283	95.2287	93.4176	95.9169	99.3399	93.3397	110.023	96.206	103.853	87.6668	103.349	105.523
29	1547.58	1662.08	1324.86	2102.12	1252.78	1655.17	1142.65	1886.44	1674.99	1583.5	1597.89	1407.34	1406.61	1575.32	1427.02	1141.71	2452.34	1571.49	2067.59	1647.31	1930.27	1513.92	1487.93	1560.41	1946.04	1541.18	3308.77	1322.02	1304.42	2783.9					98.0305	92.6814	93.4648	106.728	95.9613	93.8042	96.4526	99.5993	92.7702	111.286	95.5128	104.167	88.1426	103.344	105.407
30	1557.57	1651.74	1327.01	2110.92	1254.4	1672.64	1135.44	1891.35	1664.77	1589.8	1587.28	1419.39	1426.66	1577.13	1429.3	1141.82	2444.33	1568.6	2063.15	1641.49	1930.39	1510.1	1487.57	1566.62	1922.26	1536.86	3322.56	1356.4	1284.6	2747.32					98.6631	93.0947	93.6163	107.037	96.085	94.7943	95.8445	99.8588	93.0859	112.656	94.8787	105.059	89.3989	103.463	105.575
31	1568.64	1659.11	1324.47	2117.04	1254.85	1673.35	1146.81	1880.09	1670.44	1605.04	1589.47	1415.07	1420.42	1583.54	1407.54	1140.95	2449.52	1586.3	2065.28	1640.93	1918.75	1514.31	1495.85	1596.55	1923.3	1532.67	3319.4	1315.13	1300.01	2770.38					99.3642	92.1851	93.4371	108.162	96.1199	94.8344	96.8037	99.2642	91.976	113.036	95.0097	104.739	89.0082	103.883	103.968
32	1575.3	1642.9	1320.33	2139.29	1244.73	1669.08	1148.17	1879.42	1650.52	1616.86	1585.89	1408.14	1442.36	1592.18	1419.19	1132.44	2459.93	1582.91	2067.83	1658.26	1922.67	1513.26	1484.62	1614.87	1916.45	1531.92	3316.52	1310.79	1293.07	2762.56					99.7865	92.1654	93.1451	108.633	95.3443	94.5924	96.919	99.2286	91.5598	110.622	94.7954	104.226	90.383	104.45	104.829
33	1563.28	1642.55	1328.64	2148.61	1234.18	1674.07	1155.78	1910.27	1643.05	1635.41	1582.78	1412.17	1427.11	1592.47	1416.81	1134.21	2460.75	1580.15	2072.03	1646.75	1925.55	1517.16	1504.3	1614.73	1942.31	1534.45	3336.45	1319.72	1284.5	2786.29					99.0249	92.0162	93.7317	109.617	94.5362	94.8752	97.5615	100.858	91.2314	110.6	94.6098	104.524	89.4276	104.469	104.652
34	1558.9	1639.89	1324.52	2168.06	1226.44	1678.24	1157.07	1906.59	1637.16	1655.54	1573.56	1418.61	1433.45	1596.67	1420.26	1137.23	2468.71	1584.25	2066.86	1663.36	1948.69	1520.54	1503.19	1631.06	1936.26	1552.12	3365.79	1318.74	1281.58	2795.31					98.7471	92.1921	93.4405	109.386	93.9433	95.1116	97.6704	100.663	90.9073	110.86	94.0585	105.001	89.825	104.745	104.908
35	1558.56	1643.02	1326.79	2163.49	1227.62	1665.35	1163.79	1908.47	1631.34	1661.13	1569.13	1412.04	1444.85	1600.05	1448.06	1139.58	2474.73	1581.83	2049.2	1668.33	1930.51	1517.4	1516.4	1632.65	1951.35	1537.96	3348.78	1316.73	1285.36	2808.94					98.7261	91.664	93.601	109.773	94.0337	94.3809	98.2373	100.763	90.6055	110.487	93.7942	104.515	90.5393	104.967	106.961
36	1569.62	1633.61	1323.09	2171.16	1232.17	1665.55	1157.65	1898.4	1625.93	1625.65	1562.26	1401.85	1445.17	1600.64	1413.19	1140.71	2473.69	1564.56	2048.91	1662.64	1937.26	1535.86	1523.71	1650.06	1933.82	1543.42	3338.44	1305.46	1279.29	2805.62					99.4263	91.9977	93.3397	110.602	94.3821	94.3924	97.7187	100.231	90.8769	109.935	93.3835	103.761	90.5589	105.005	104.386
37	1583.65	1639.56	1323.91	2187.55	1231.84	1672.62	1169.91	1922.46	1630.8	1625.33	1564.24	1403.25	1453.64	1611.21	1410.73	1143.54	2486.28	1567.19	2053.66	1653.92	1935.32	1516.57	1539.15	1654.12	1948.79	1558.66	3332.63	1317.96	1292.22	2831.72					100.315	92.2412	93.3976	110.94	94.3568	94.793	98.7542	101.501	90.7593	110.417	93.5013	103.864	91.0899	105.699	104.204
38	1578.19	1643.9	1321.55	2194.22	1225.88	1667.38	1173.42	1922.92	1628.69	1629.15	1562.02	1403.09	1458.22	1614.17	1414.78	1154.7	2489.67	1571.17	2033.28	1667.89	1937.84	1523.04	1513.24	1655.08	1941.08	1545.98	3339.72	1314.56	1282.89	2860.99					99.9693	92.5942	93.2314	110.723	93.9005	94.4961	99.0505	101.525	90.0857	109.629	93.3688	103.852	91.3772	105.893	104.503
39	1576.07	1650.19	1323.34	2189.94	1228.35	1645.24	1171.92	1912.84	1616.6	1623.67	1558.9	1409.1	1504.97	1611.79	1417.05	1136.27	2492.61	1583.88	2051.73	1683.59	1947.37	1535.16	1523.6	1659.02	1949.29	1539.23	3332.91	1311.61	1284.67	2862.9					99.8351	92.5561	93.3572	112.059	94.0898	93.241	98.924	100.993	90.6303	109.492	93.1824	104.297	94.3064	105.737	104.67
40	1575.36	1649.51	1320.34	2216.36	1230.53	1661.29	1174.25	1909.54	1626.37	1615.56	1562.18	1397.94	1468.54	1617.22	1421.77	1141.08	2497.78	1582.79	2048.41	1697.72	1928.57	1522.02	1523.68	1644.27	1962.57	1543.28	3340.3	1323.22	1284.38	2882.73					99.79	92.6264	93.1457	112.091	94.2564	94.1509	99.1205	100.819	91.0088	109.153	93.3786	103.471	92.0234	106.093	105.019
41	1583.83	1650.76	1315.27	2216.99	1218.85	1664	1176.92	1909.95	1633.16	1622.63	1545.32	1395.24	1481.12	1622.43	1414.95	1147.84	2517.42	1586.08	2038.05	1704.03	1957.67	1511.25	1541.76	1648.37	1954.57	1566.51	3350.74	1308.56	1289.14	2878.57					100.327	92.677	92.7884	112.76	93.3619	94.3047	99.3455	100.841	90.2853	108.996	92.3708	103.271	92.8121	106.435	104.516
42	1584.68	1651.67	1330.31	2230.22	1234.46	1661.97	1171.71	1919.18	1620.18	1611.05	1534.79	1390.91	1477.74	1629.77	1409.05	1142.68	2524.89	1589.62	2045.39	1693.79	1954.78	1516.79	1536.24	1666.47	1946.09	1551.71	3332.77	1301.29	1282.16	2877.68					100.38	92.5442	93.8492	112.567	94.5576	94.1891	98.9059	101.328	90.5397	109.188	91.7412	102.951	92.5999	106.916	104.08
43	1577.83	1649.3	1323.27	2226.41	1229.75	1645.73	1183.59	1909.99	1624.75	1609.04	1546.9	1401.89	1492.57	1622.05	1404.06	1149.14	2533.92	1590.4	2053.77	1702.39	1969.89	1514.78	1530.11	1667.88	1957.47	1545.21	3315.14	1307.4	1269.19	2862.03					99.9462	92.553	93.3526	112.204	94.1966	93.269	99.9089	100.843	90.6495	108.773	92.4651	103.763	93.5296	106.41	103.711
44	1626.71	1649.45	1324.53	2219.24	1208.17	1647.17	1189.25	1896.5	1626.72	1604.06	1538.45	1379.65	1492.06	1626.36	1398.34	1147.94	2542.27	1584.82	2049.84	1715.43	1974.53	1511.35	1548.33	1681.48	1967.88	1541.33	3322.22	1314.39	1259.01	2857.3					103.043	92.6088	93.4415	111.99	92.5435	93.3504	100.386	100.13	90.6118	107.31	91.96	102.117	93.4971	106.692	103.288
45	1569.71	1650.45	1320.25	2215	1216.3	1644.63	1176.26	1900.21	1626.04	1601.75	1532.08	1374.24	1492.35	1619.38	1398.5	1155.53	2530.23	1566.35	2067.05	1727.15	1979.31	1509.32	1532.04	1665.76	1957.68	1563.3	3320.41	1311.36	1279.39	2863.08					99.4322	92.7376	93.1393	112.569	93.1665	93.2064	99.2903	100.327	90.5153	106.802	91.5789	101.716	93.5158	106.234	103.301
46	1578.3	1652.75	1325.61	2226.46	1231.25	1647.72	1186.02	1894.23	1624.31	1604.58	1539.63	1376.1	1493.59	1607.48	1394.22	1157.74	2545.92	1664.95	2060.9	1732.38	1994.49	1522.45	1551.31	1664.87	1970.2	1563.45	3301.7	1315.1	1300.2	2869.67					99.9764	93.2936	93.5174	112.612	94.3121	93.3817	100.113	100.011	90.574	106.52	92.0304	101.854	93.5931	105.454	102.984
47	1586.07	1662.65	1343.31	2227.3	1226.04	1651.13	1182.48	1903.94	1625.36	1598.49	1526.74	1386.06	1494.86	1608.1	1396.81	1166.79	2543.04	1583.36	2063.08	1747.68	2007.5	1514.13	1556.2	1662.82	1967.72	1575.36	3311.19	1333.12	1310.39	2883.7					100.469	92.9805	94.7663	112.927	93.9125	93.5748	99.815	100.524	90.0539	106.509	91.2602	102.592	93.6726	105.495	103.175
48	1597.04	1657.07	1348.81	2233.53	1219.67	1651.08	1185.24	1900.26	1616.03	1576.98	1540.24	1384.57	1505.55	1609.81	1395.08	1157.2	2550.6	1589.89	2059.26	1744.53	2012.86	1516.61	1541.42	1675.12	1967.9	1560.63	3294.31	1321.13	1346.33	2896.45					101.164	93.1838	95.1545	112.906	93.4248	93.5723	100.048	100.329	90.1143	105.984	92.0672	102.482	94.3426	105.607	103.048
49	1604.41	1660.7	1355.39	2233.12	1213.33	1646.49	1176.53	1900.62	1617.11	1569.51	1530.24	1380.02	1509.78	1598.86	1403.95	1167.04	2555.52	1591.32	2076.68	1765.68	2016.96	1517.02	1540.43	1666.31	1983.46	1574.44	3293.2	1302.52	1337.26	2887.5					101.63	93.8068	95.6186	113.52	92.9392	93.3119	99.3131	100.348	89.824	105.747	91.4692	102.145	94.6077	104.889	103.703
50	1615.16	1671.8	1352.9	2245.27	1230.03	1648.61	1190.59	1904.65	1611.9	1565.38	1527.18	1376.74	1512.12	1592.63	1394.91	1168.96	2556.49	1586.3	2082.37	1766.92	2058	1523.79	1539.11	1674.62	1977.44	1565.37	3293	1325.94	1347.92	2906.35					102.311	93.4378	95.443	112.58	94.2185	93.4325	100.5	100.561	90.0781	105.113	91.2861	101.902	94.7542	104.48	103.035
51	1620.56	1665.22	1356.24	2226.67	1219.97	1650.1	1177.49	1890.59	1616.46	1565.2	1522.53	1380.92	1525.03	1591.52	1403.8	1176.49	2590.69	1588.58	2095.93	1771.74	2069.06	1524.85	1543.25	1671.4	1986.59	1571.57	3305.81	1312.22	1358.36	2907.26					102.653	93.5228	95.6783	113.056	93.4477	93.5164	99.3942	99.8186	90.4564	104.743	91.0081	102.211	95.5632	104.407	103.692
52	1640.98	1666.74	1366.55	2236.09	1225.33	1647.74	1191.93	1907.9	1623.25	1557.49	1510.86	1390.18	1517.36	1583.99	1406.49	1185.97	2581.18	1589.52	2104.43	1776.73	2077.21	1513.41	1546.24	1670.07	1984.83	1578.42	3295.63	1333.16	1385.84	2922.22					103.946	93.8238	96.4061	114.267	93.858	93.3829	100.613	100.733	90.4255	103.994	90.3107	102.896	95.0826	103.913	103.891
53	1631.43	1672.1	1370.79	2260.03	1203.36	1657.03	1184.7	1899.13	1622.7	1554	1516.17	1380.92	1520.82	1586.8	1389.82	1196.95	2586.76	1602.72	2118.38	1782.87	2086.15	1541.54	1533.5	1671.98	1993.15	1575.17	3288.77	1328.49	1380.04	2925.03					103.342	94.0044	96.7049	113.755	92.1753	93.9094	100.003	100.27	90.007	104.027	90.6282	102.211	95.2998	104.097	102.659
54	1613.66	1675.32	1379.71	2249.91	1204.92	1655.49	1185.3	1887.57	1615.19	1544.7	1513.88	1389.61	1526.96	1578.8	1396.73	1196.01	2595.17	1573.87	2130.67	1786.7	2101.01	1528.85	1537.34	1678.34	1987.73	1575.45	3354	1320.67	1386.38	2886.07					102.216	93.7175	97.3346	113.965	92.295	93.8224	100.053	99.6592	89.2936	103.617	90.4916	102.854	95.6842	103.573	103.169
55	1634.27	1670.21	1383.81	2254.06	1201.51	1657.6	1196.51	1889.1	1602.38	1539.26	1501.94	1389.47	1533.71	1562.53	1382.6	1213.69	2591.74	1583.02	2150.5	1788.15	2085.39	1526.48	1544.11	1680.2	1999.17	1584.52	3333.6	1336.57	1365.43	2883.47					103.522	94.0693	97.6235	114.881	92.0335	93.9417	100.999	99.7399	88.8708	103.687	89.7776	102.844	96.1071	102.505	102.126
56	1643.18	1676.48	1395.06	2272.18	1216.51	1651.64	1191.4	1887.39	1594.8	1528.25	1506.07	1391.91	1534.02	1564.49	1382.88	1197.94	2599.2	1571.41	2156.79	1817.65	2099.27	1529.18	1553.32	1682.57	1987.24	1584.74	3339.55	1320.77	1349.89	2863.91					104.086	94.0438	98.417	115.104	93.1825	93.6041	100.568	99.6498	88.6115	103.379	90.0243	103.025	96.1268	102.634	102.147
57	1643.04	1676.02	1389.93	2276.59	1229.88	1645.03	1189.13	1891.1	1590.14	1528.73	1502.01	1399.14	1534.66	1569.28	1385.08	1208.16	2604.97	1586.52	2164.89	1799.5	2089.24	1533.55	1538.44	1663.12	2019.62	1595.94	3351.38	1322.81	1321.16	2847.41					104.077	93.7134	98.055	115.275	94.2067	93.2292	100.376	99.8452	87.7583		89.7821	103.559	96.1668	102.948	102.309
58	1649.53	1670.14	1400.01	2279.98	1237.93	1666.25	1189.89	1892	1574.83	1522.7	1508.79	1398.98	1536.72	1581.12	1393.58	1201.68	2637.91	1586.83	2175.53	1810.75	2079.13	1526.33	1536.8	1669.58	2003.1	1587.64	3334.02	1330.14	1296.26	2854.79					104.489	94.1811	98.7665	115.571	94.8233	94.4317	100.44	99.8928	87.9485		90.1869	103.548	96.296	103.725	102.937
59	1656.2	1678.47	1405.99	2285.83	1227.88	1657.33	1207.44	1879.7	1578.25	1523.74	1506.88	1384.18	1538.52	1559.86	1386.34	1253.17	2605.07	1584.89	2189.92	1781.13	2094	1552.31	1536.85	1679.99	2009.86	1591.32	3346.82	1319.95	1293.05	2839.66					104.911	94.2818	99.1886	115.897	94.0536	93.9266	101.922	99.2438	87.737		90.0731	102.452	96.4085	102.33	102.402
60	1628.07	1680.27	1408.18	2292.28	1224	1655	1207.8	1885.48	1574.45	1519.21	1506.27	1386.08																							103.129		99.3425		93.7563	93.7945	101.953	99.5488			90.0363	102.593
[truncated: 20 more columns]

## Sheet: A
dA/dt	7.32125	5.12166	8.67549	1.33295	5.31038	4.38234	5.63501	13.3821	8.52586	5.27515	2.88735	9.0555	28.3948	4.20624	4.26732	19.1508	4.63391	3.45976	5.19555	3.63817	7.34845	2.56285	7.20878	6.82491	3.28521	15.2337	9.91447	9.42123	13.0559	11.0969		6.22996	5.62548
	1	1	2	2	2	2	3	3	3	4	6	6	3	3	3	3	4	4	4	4	4	4	4	4	4	8	8	11	11	11
	1	6 s1	2	3 s1	4	5	2	5	7 s1	7 s4	1	5	5	6	7	9	1	2 s3	3 s1	7	8	9	10 s8	12 s1	13	5 s1	6	1	2	7
0	54.395	17.889	22.881	75.613	17.681	61.78	21.009	61.156	20.385	65.212	64.692	12.377	27.666	36.922	28.602	75.197	72.492	29.954	19.657	60.844	114.719	68.852	10.609	57.619	74.78	11.025	69.476	49.507	53.875	22.153		45.9673	25.8247	30	0	4.71492
1			31.202				52.523	89.653	40.666	61.26			34.738	51.067		84.765		39.938	49.195	72.076	135.52			69.996	88.301	32.138	120.127	65.42	68.644	35.154		64.3359	28.5585	19	1	6.55177
2	56.059		48.467		37.962			94.958		91.317	67.604		54.707	66.668	56.683	100.47	88.925			72.596	166.722	76.133	28.082	83.309	85.389	59.388	124.495		62.716	63.236		75.5184	29.7518	21	2	6.49238
3	83.309	74.78	64.172			85.285	52.107		60.74	103.382			61.26		65.316	98.39				65.108	175.667	77.173	46.699	112.223	108.895		125.328	79.877	90.485			85.7998	29.7418	19	3	6.82324
4			95.374		58.035				63.964		80.605			58.139	74.572	195.948	88.093	44.827		63.028	182.947		44.099			100.47	142.593	85.077	131.36			94.3207	44.8083	16	4	11.2021
5	111.807			77.693	69.996		65.94	95.062	87.053			40.146	72.284	70.412		213.005	99.326	50.547		92.046	171.714	92.566	69.164		114.199	133.024	161.626	73.012				98.0311	42.0028	20	5	9.39211
6			88.093				68.436	110.871			92.15	58.348	88.405	70.1	75.717		101.822		78.733					108.479				97.038	135.832	110.871		91.7782	20.112	14	6	5.37515
7			87.469			93.398		118.047	89.653			82.477		75.821	66.356	214.253			72.18		178.787	78.317	65.732		93.814	126.472	174.626		148.209			110.351	44.1974	16	7	11.0493
8	138.744	76.965		92.254	57.307			121.479	94.958	120.439		81.645	161.73	76.757	75.405					79.669	188.459		72.284	110.351				122.831	149.561	124.183		108.057	34.6564	18	8	8.1686
9		79.357	120.647	82.685				265.632	98.286		93.814		315.347		78.109	218.205	115.759		68.644		201.148		77.589	120.023	112.847	144.361	166.93		169.01			140.466	68.1985	18	9	16.0745
10	105.878	79.669	102.03		80.085		87.573		118.255	113.575	88.509		316.283				121.375			106.19		98.494	89.445	147.481				153.721		128.448		121.063	54.71	16	10	13.6775
11	117.735	90.485	126.16	85.909				262.72		105.254	87.365	85.389			74.989	213.733	115.135	53.979	75.717		216.853	100.574		135.416	91.213	182.323	184.715		160.586			128.312	55.3366	20	11	12.3736
12						115.343	115.343				87.469		316.491	82.373	66.148				94.542			112.119	94.75		97.766		195.636	156.737		142.281		129	63.4776	13	12	17.6055
13	125.12	93.19	121.791	92.254	81.749			287.889	143.321					78.525	85.077		88.197		103.07	90.797	318.467			134.896	153.305	166.722		158.818	178.163			138.964	65.8795	18	13	15.528
14		110.559	139.264									102.654	338.02	88.405	110.143	213.941				91.838	325.852	149.873	92.046		103.694		183.051			135.936		156.091	79.8728	14	14	21.3469
15		103.382								110.247							111.183	69.788		84.661				140.928		174.626		146.233				117.631	32.1799	8	15	11.3773
16	141.761			99.534	104.422				263.448				357.99	90.797	129.488	218.309		72.7			336.252	120.023	114.823	126.16	116.175		228.814	217.477		169.01		171.011	83.1545	17	16	20.1679
17		250.239	125.016								159.754				173.066		98.39			75.925		143.737			165.266							148.924	49.6399	8	17	17.5504
18				104.734	97.974	115.135			266.984			138.744		87.053	172.338			80.189	113.887			111.287	141.449	141.24	156.841	183.675						136.538	46.839	14	18	12.5182
19	128.552		133.752		95.062								410.929	81.645		221.117	107.854	67.604		85.805	367.454	137.496			158.089		385.551	238.174	248.575	166.306		189.623	108.936	16	19	27.234
20		292.674		113.887	124.287						256.271			91.942	235.782				284.457			162.146	222.677	159.754	161.314							191.381	66.905	11	20	20.1726
21														95.062		220.805		86.221		100.366	376.607		236.406			184.923						185.77	96.8377	7	21	36.6012
22										127.304			418.209		261.472							138.224		233.39	268.232							241.139	96.705	6	22	39.4797
23				109.727	105.67									97.558				92.774	352.269	84.661			246.599			217.165						163.303	91.6657	8	23	32.4087
24	182.843		135.728										451.387		260.432	223.717	112.431				383.991	151.225		284.977	302.346			266.256		166.722		243.505	98.4109	12	24	28.4088
25				104.11		87.157								94.126				72.18	358.926	104.942												136.907	99.9039	6	25	40.7856
26										113.783					280.089	222.365		97.974			403.544		235.47									225.538	102.902	6	26	42.0094
27		382.951			227.566									110.143	285.705			131.048				163.082										216.749	94.9427	6	27	38.7602
28				111.807			90.277		396.784			167.554		100.262	275.825				362.67	122.103				283.313		214.669						212.526	106.493	10	28	33.676
29	216.333		174.002		276.969						271.248		480.717	105.046	304.322	217.997	128.76	239.422			376.919	143.217			335.004		442.963	255.751	265.528	176.499		259.453	102.109	17	29	24.765
30				115.863		116.695								121.583						141.449												123.897	10.3663	4	30	5.18315
31										240.878					341.349			265.632				182.323	253.671									256.771	51.062	5	31	22.8356
32														126.16			131.984			137.912												132.019	4.7978	3	32	2.77001
33		450.555		116.487										135					371.198					348.317		242.855						277.402	123.271	6	33	50.3251
34	222.469		255.855										516.495	124.808	367.454	221.741	120.127	269.064		137.704	411.553							274.16				265.585	119.061	11	34	35.8983
35										257.936				132.504																		195.22	62.716	2	35	44.3469
36														136.664	375.151					157.465			271.248									235.132	95.705	4	36	47.8525
37														141.344				268.752														205.048	63.704	2	37	45.0455
38		505.678		142.593		135.832			582.643					137.808					392.832			171.61		402.504		304.53						308.448	161.662	9	38	53.8874
39	224.341		267.504		336.044						323.771	212.589	593.772	252.319	399.8	238.59	117.215			155.489	441.611				364.438		482.485	294.754	300.682	184.091		305.264	119.652	17	39	29.02
40							132.504							253.983																		193.243	60.7395	2	40	42.9493
41								297.146							366.206								281.025									314.792	36.9459	3	41	21.3307
42														272.704																		272.704	0	1	42	0
43																				169.946												169.946	0	1	43	0
44				168.906										285.497	397.304		128.344					197.3										235.47	95.9757	5	44	42.9216
45						192.412				327.828																						260.12	67.708	2	45	47.8768
46														287.161	432.354								294.754									338.09	66.727	3	46	38.5248
47																		336.564														336.564	0	1	47	0
48		589.715		324.916				400.008	772.974										440.258					433.81		321.795						469.068	149.392	7	48	56.4649
49	229.854		365.166		385.239						378.583	319.299	685.921	299.954	471.252	241.19	151.433			113.055	439.426	217.477			422.993		698.61	318.779	336.772	184.403		347.745	155.639	18	49	36.6845
50																																		0	50	#DIV/0!
51														362.046	438.906								302.138									367.697	55.9781	3	51	32.319
52																						275.825										275.825	0	1	52	0
53																																		0	53	#DIV/0!
54														349.149	512.647		167.346			108.479												284.405	158.854	4	54	79.4272
55																																		0	55	#DIV/0!
56										461.58				362.046																		411.813	49.767	2	56	35.1906
57																		364.334														364.334	0	1	57	0
58																			401.672					454.611		369.534						408.606	35.0769	3	58	20.2516
59		704.642		366.31					853.371				743.229	370.886	495.278	248.471	185.755			251.071	391.48	312.123			489.765		862.94	338.02	355.909	367.35		458.538	209.233	16	59	52.3081
60	271.976		446.707		385.551	291.946	206.764	505.886			449.307	350.917																				363.632	95.6996	8	60	33.8349
