# Supplementary material for: A mechano-osmotic feedback couples cell volume to the rate of cell deformation
Source: eLife journal article supplement (doi:10.7554/elife.72381), 2022-04-13
Supplement: supp [file M_V_confineemnt.xlsx]

## Sheet: 20181122
20 µm	lineage	Mass	Volume		5 µm	lineage	Mass	Volume			20 µm	5 µm
2018_11_22_hela_spreading_confinement_20um_2_12_w3Phasics_s6__Phase_Cleaned.tif	1	251.319	747.899		2018_11_22_hela_spreading_confinement_5um_2__w3Phasics_s1__Phase_Cleaned.tif	1	331.482	906.885		Volume	1326.5	829.786		100	62.5543
2018_11_22_hela_spreading_confinement_20um_2_12_w3Phasics_s6__Phase_Cleaned.tif	2	299.116	1125.64		2018_11_22_hela_spreading_confinement_5um_2__w3Phasics_s1__Phase_Cleaned.tif	2	249.263	864.926		stdev	402.221	176.351		30.3218	13.2944
2018_11_22_hela_spreading_confinement_20um_2_12_w3Phasics_s6__Phase_Cleaned.tif	4	407.71	971.171		2018_11_22_hela_spreading_confinement_5um_2__w3Phasics_s1__Phase_Cleaned.tif	3	336.085	1082.02		Mass	324.126	296.68		100	91.5323
2018_11_22_hela_spreading_confinement_20um_2_12_w3Phasics_s6__Phase_Cleaned.tif	5	337.603	960.706		2018_11_22_hela_spreading_confinement_5um_2__w3Phasics_s1__Phase_Cleaned.tif	4	293.416	777.923		stdev	78.896	47.6625		24.3412	14.7049
2018_11_22_hela_spreading_confinement_20um_2_12_w3Phasics_s6__Phase_Cleaned.tif	10	258.386	1053.24		2018_11_22_hela_spreading_confinement_5um_2__w3Phasics_s1__Phase_Cleaned.tif	6	298.789	715.296		n	155	49
2018_11_22_hela_spreading_confinement_20um_2_12_w3Phasics_s6__Phase_Cleaned.tif	14	289.304	939.458		2018_11_22_hela_spreading_confinement_5um_2__w3Phasics_s1__Phase_Cleaned.tif	7	302.188	819.752
2018_11_22_hela_spreading_confinement_20um_2_12_w3Phasics_s6__Phase_Cleaned.tif	15	281.992	723.563		2018_11_22_hela_spreading_confinement_5um_2__w3Phasics_s1__Phase_Cleaned.tif	9	296.815	754.11
2018_11_22_hela_spreading_confinement_20um_2_12_w3Phasics_s6__Phase_Cleaned.tif	17	287.388	1020.25		2018_11_22_hela_spreading_confinement_5um_2__w3Phasics_s1__Phase_Cleaned.tif	10	247.861	671.347
2018_11_22_hela_spreading_confinement_20um_2_12_w3Phasics_s6__Phase_Cleaned.tif	19	270.533	786.684		2018_11_22_hela_spreading_confinement_5um_2__w3Phasics_s1__Phase_Cleaned.tif	11	356.993	968.037
2018_11_22_hela_spreading_confinement_20um_2_12_w3Phasics_s6__Phase_Cleaned.tif	20	576.132	2336.22		2018_11_22_hela_spreading_confinement_5um_2__w3Phasics_s1__Phase_Cleaned.tif	12	334.893	791.97
2018_11_22_hela_spreading_confinement_20um_2_12_w3Phasics_s6__Phase_Cleaned.tif	22	360.485	1507.6		2018_11_22_hela_spreading_confinement_5um_2__w3Phasics_s1__Phase_Cleaned.tif	13	238.318	663.496
2018_11_22_hela_spreading_confinement_20um_2_12_w3Phasics_s6__Phase_Cleaned.tif	23	230.224	1017		2018_11_22_hela_spreading_confinement_5um_2__w3Phasics_s1__Phase_Cleaned.tif	14	269.097	673.572
2018_11_22_hela_spreading_confinement_20um_2_12_w3Phasics_s6__Phase_Cleaned.tif	24	248.294	742.48		2018_11_22_hela_spreading_confinement_5um_2__w3Phasics_s1__Phase_Cleaned.tif	15	261.901	772.722
2018_11_22_hela_spreading_confinement_20um_2_12_w3Phasics_s6__Phase_Cleaned.tif	26	301.919	819.912		2018_11_22_hela_spreading_confinement_5um_2__w3Phasics_s1__Phase_Cleaned.tif	16	325.829	956.025
2018_11_22_hela_spreading_confinement_20um_2_12_w3Phasics_s6__Phase_Cleaned.tif	28	242.185	741.563		2018_11_22_hela_spreading_confinement_5um_2__w3Phasics_s1__Phase_Cleaned.tif	17	343.128	880.814
2018_11_22_hela_spreading_confinement_20um_2_12_w3Phasics_s6__Phase_Cleaned.tif	30	240.479	670.708		2018_11_22_hela_spreading_confinement_5um_2__w3Phasics_s1__Phase_Cleaned.tif	19	255.956	788.103
2018_11_22_hela_spreading_confinement_20um_2_12_w3Phasics_s6__Phase_Cleaned.tif	34	241.647	990.978		2018_11_22_hela_spreading_confinement_5um_2__w3Phasics_s1__Phase_Cleaned.tif	20	307.631	879.959
2018_11_22_hela_spreading_confinement_20um_2_12_w3Phasics_s6__Phase_Cleaned.tif	35	437.133	662.517		2018_11_22_hela_spreading_confinement_5um_2__w3Phasics_s1__Phase_Cleaned.tif	23	267.765	821.75
2018_11_22_hela_spreading_confinement_20um_2_12_w3Phasics_s6__Phase_Cleaned.tif	38	350.674	1030.87		2018_11_22_hela_spreading_confinement_5um_2_3_w3Phasics_s4__Phase_Cleaned.tif	1	232.455	658.862
2018_11_22_hela_spreading_confinement_20um_2_12_w3Phasics_s6__Phase_Cleaned.tif	40	306.066	1049.06		2018_11_22_hela_spreading_confinement_5um_2_3_w3Phasics_s4__Phase_Cleaned.tif	1	232.455	658.862
2018_11_22_hela_spreading_confinement_20um_2_12_w3Phasics_s6__Phase_Cleaned.tif	41	393.109	930.914		2018_11_22_hela_spreading_confinement_5um_2_3_w3Phasics_s4__Phase_Cleaned.tif	2	231.731	626.994
2018_11_22_hela_spreading_confinement_20um_2_12_w3Phasics_s6__Phase_Cleaned.tif	44	249.625	651.1		2018_11_22_hela_spreading_confinement_5um_2_3_w3Phasics_s4__Phase_Cleaned.tif	3	327.721	868.898
2018_11_22_hela_spreading_confinement_20um_2_12_w3Phasics_s6__Phase_Cleaned.tif	45	239.463	698.623		2018_11_22_hela_spreading_confinement_5um_2_3_w3Phasics_s4__Phase_Cleaned.tif	4	296.791	829.707
2018_11_22_hela_spreading_confinement_20um_2_12_w3Phasics_s6__Phase_Cleaned.tif	47	363.394	1091.63		2018_11_22_hela_spreading_confinement_5um_2_3_w3Phasics_s4__Phase_Cleaned.tif	5	257.591	597.42
2018_11_22_hela_spreading_confinement_20um_2_12_w3Phasics_s6__Phase_Cleaned.tif	48	386.883	1378.55		2018_11_22_hela_spreading_confinement_5um_2_3_w3Phasics_s4__Phase_Cleaned.tif	7	209.024	544.491
2018_11_22_hela_spreading_confinement_20um_2_11_w3Phasics_s5__Phase_Cleaned.tif	1	299.887	1229.96		2018_11_22_hela_spreading_confinement_5um_2_3_w3Phasics_s4__Phase_Cleaned.tif	8	331.296	805.298
2018_11_22_hela_spreading_confinement_20um_2_11_w3Phasics_s5__Phase_Cleaned.tif	2	393.822	1573.58		2018_11_22_hela_spreading_confinement_5um_2_3_w3Phasics_s4__Phase_Cleaned.tif	9	314.02	764.169
2018_11_22_hela_spreading_confinement_20um_2_11_w3Phasics_s5__Phase_Cleaned.tif	3	411.506	2062.5		2018_11_22_hela_spreading_confinement_5um_2_3_w3Phasics_s4__Phase_Cleaned.tif	10	302.947	1283.56
2018_11_22_hela_spreading_confinement_20um_2_11_w3Phasics_s5__Phase_Cleaned.tif	4	252.253	1371.74		2018_11_22_hela_spreading_confinement_5um_2_1_w3Phasics_s2__Phase_Cleaned.tif	1	372.633	1276
2018_11_22_hela_spreading_confinement_20um_2_11_w3Phasics_s5__Phase_Cleaned.tif	5	252.732	1341.74		2018_11_22_hela_spreading_confinement_5um_2_1_w3Phasics_s2__Phase_Cleaned.tif	2	336.248	1058.06
2018_11_22_hela_spreading_confinement_20um_2_11_w3Phasics_s5__Phase_Cleaned.tif	6	463.706	1798.23		2018_11_22_hela_spreading_confinement_5um_2_1_w3Phasics_s2__Phase_Cleaned.tif	4	252.464	805.058
2018_11_22_hela_spreading_confinement_20um_2_11_w3Phasics_s5__Phase_Cleaned.tif	8	358.85	1956.99		2018_11_22_hela_spreading_confinement_5um_2_1_w3Phasics_s2__Phase_Cleaned.tif	5	335.582	1069.19
2018_11_22_hela_spreading_confinement_20um_2_11_w3Phasics_s5__Phase_Cleaned.tif	9	321.659	1675.29		2018_11_22_hela_spreading_confinement_5um_2_1_w3Phasics_s2__Phase_Cleaned.tif	6	287.692	805.443
2018_11_22_hela_spreading_confinement_20um_2_11_w3Phasics_s5__Phase_Cleaned.tif	11	509.704	2237.84		2018_11_22_hela_spreading_confinement_5um_2_1_w3Phasics_s2__Phase_Cleaned.tif	7	378.357	1027.41
2018_11_22_hela_spreading_confinement_20um_2_11_w3Phasics_s5__Phase_Cleaned.tif	12	216.102	1038.14		2018_11_22_hela_spreading_confinement_5um_2_1_w3Phasics_s2__Phase_Cleaned.tif	8	329.438	878.281
2018_11_22_hela_spreading_confinement_20um_2_11_w3Phasics_s5__Phase_Cleaned.tif	14	218.882	1069.81		2018_11_22_hela_spreading_confinement_5um_2_1_w3Phasics_s2__Phase_Cleaned.tif	9	317.045	1055.38
2018_11_22_hela_spreading_confinement_20um_2_11_w3Phasics_s5__Phase_Cleaned.tif	15	225.283	991.556		2018_11_22_hela_spreading_confinement_5um_2_1_w3Phasics_s2__Phase_Cleaned.tif	10	323.224	721.615
2018_11_22_hela_spreading_confinement_20um_2_11_w3Phasics_s5__Phase_Cleaned.tif	16	295.46	1307.47		2018_11_22_hela_spreading_confinement_5um_2_2_w3Phasics_s3__Phase_Cleaned.tif	1	318.669	916.015
2018_11_22_hela_spreading_confinement_20um_2_11_w3Phasics_s5__Phase_Cleaned.tif	17	398.073	1966.67		2018_11_22_hela_spreading_confinement_5um_2_2_w3Phasics_s3__Phase_Cleaned.tif	2	311.301	915.077
2018_11_22_hela_spreading_confinement_20um_2_11_w3Phasics_s5__Phase_Cleaned.tif	18	305.353	1749.4		2018_11_22_hela_spreading_confinement_5um_2_2_w3Phasics_s3__Phase_Cleaned.tif	3	364.468	968.693
2018_11_22_hela_spreading_confinement_20um_2_11_w3Phasics_s5__Phase_Cleaned.tif	19	255.372	1307		2018_11_22_hela_spreading_confinement_5um_2_2_w3Phasics_s3__Phase_Cleaned.tif	4	321.627	1050.35
2018_11_22_hela_spreading_confinement_20um_2_11_w3Phasics_s5__Phase_Cleaned.tif	20	390.703	2183.81		2018_11_22_hela_spreading_confinement_5um_2_2_w3Phasics_s3__Phase_Cleaned.tif	5	318.346	915.399
2018_11_22_hela_spreading_confinement_20um_2_11_w3Phasics_s5__Phase_Cleaned.tif	21	325.549	1297.9		2018_11_22_hela_spreading_confinement_5um_2_2_w3Phasics_s3__Phase_Cleaned.tif	6	320.602	703.972
2018_11_22_hela_spreading_confinement_20um_2_11_w3Phasics_s5__Phase_Cleaned.tif	23	292.493	1257.82		2018_11_22_hela_spreading_confinement_5um_2_4_w3Phasics_s5__Phase_Cleaned.tif	1	294.011	794.873
2018_11_22_hela_spreading_confinement_20um_2_10_w3Phasics_s4__Phase_Cleaned.tif	1	252.545	1159.41		2018_11_22_hela_spreading_confinement_5um_2_4_w3Phasics_s5__Phase_Cleaned.tif	2	326.927	774.666
2018_11_22_hela_spreading_confinement_20um_2_10_w3Phasics_s4__Phase_Cleaned.tif	2	263.782	1056.6		2018_11_22_hela_spreading_confinement_5um_2_4_w3Phasics_s5__Phase_Cleaned.tif	3	379.116	976.341
2018_11_22_hela_spreading_confinement_20um_2_10_w3Phasics_s4__Phase_Cleaned.tif	3	248.422	1196.56		2018_11_22_hela_spreading_confinement_5um_2_4_w3Phasics_s5__Phase_Cleaned.tif	6	194.797	486.151
2018_11_22_hela_spreading_confinement_20um_2_10_w3Phasics_s4__Phase_Cleaned.tif	4	303.426	1243.88		2018_11_22_hela_spreading_confinement_5um_2_4_w3Phasics_s5__Phase_Cleaned.tif	7	187.356	546.089
2018_11_22_hela_spreading_confinement_20um_2_10_w3Phasics_s4__Phase_Cleaned.tif	5	423.736	1926.49		2018_11_22_hela_spreading_confinement_5um_2_4_w3Phasics_s5__Phase_Cleaned.tif	8	213.964	488.461
2018_11_22_hela_spreading_confinement_20um_2_10_w3Phasics_s4__Phase_Cleaned.tif	6	555.469	1295.03
2018_11_22_hela_spreading_confinement_20um_2_10_w3Phasics_s4__Phase_Cleaned.tif	7	282.997	927.773
2018_11_22_hela_spreading_confinement_20um_2_10_w3Phasics_s4__Phase_Cleaned.tif	9	453.696	1926.66
2018_11_22_hela_spreading_confinement_20um_2_10_w3Phasics_s4__Phase_Cleaned.tif	10	316.66	1293.27
2018_11_22_hela_spreading_confinement_20um_2_10_w3Phasics_s4__Phase_Cleaned.tif	11	343.21	1951.01
2018_11_22_hela_spreading_confinement_20um_2_10_w3Phasics_s4__Phase_Cleaned.tif	13	386.953	1353.99
2018_11_22_hela_spreading_confinement_20um_2_10_w3Phasics_s4__Phase_Cleaned.tif	14	209.502	1198.72
2018_11_22_hela_spreading_confinement_20um_2_10_w3Phasics_s4__Phase_Cleaned.tif	15	234.242	1025.04
2018_11_22_hela_spreading_confinement_20um_2_10_w3Phasics_s4__Phase_Cleaned.tif	16	261.247	818.292
2018_11_22_hela_spreading_confinement_20um_2_10_w3Phasics_s4__Phase_Cleaned.tif	17	300.634	957.035
2018_11_22_hela_spreading_confinement_20um_2_10_w3Phasics_s4__Phase_Cleaned.tif	18	217.539	1088.67
2018_11_22_hela_spreading_confinement_20um_2_10_w3Phasics_s4__Phase_Cleaned.tif	19	416.412	1610.38
2018_11_22_hela_spreading_confinement_20um_2_10_w3Phasics_s4__Phase_Cleaned.tif	20	230.598	1038.91
2018_11_22_hela_spreading_confinement_20um_2_10_w3Phasics_s4__Phase_Cleaned.tif	21	370.507	1481.65
2018_11_22_hela_spreading_confinement_20um_2_10_w3Phasics_s4__Phase_Cleaned.tif	23	234.674	933.681
2018_11_22_hela_spreading_confinement_20um_2_10_w3Phasics_s4__Phase_Cleaned.tif	24	330.618	1463.63
2018_11_22_hela_spreading_confinement_20um_2_10_w3Phasics_s4__Phase_Cleaned.tif	25	309.827	986.506
2018_11_22_hela_spreading_confinement_20um_2_10_w3Phasics_s4__Phase_Cleaned.tif	26	372.329	2404.34
2018_11_22_hela_spreading_confinement_20um_2_10_w3Phasics_s4__Phase_Cleaned.tif	27	266.013	1201.86
2018_11_22_hela_spreading_confinement_20um_2_10_w3Phasics_s4__Phase_Cleaned.tif	28	293.602	1155.68
2018_11_22_hela_spreading_confinement_20um_2_10_w3Phasics_s4__Phase_Cleaned.tif	29	312.852	1308.6
2018_11_22_hela_spreading_confinement_20um_2_10_w3Phasics_s4__Phase_Cleaned.tif	30	234.838	1269.99
2018_11_22_hela_spreading_confinement_20um_2_10_w3Phasics_s4__Phase_Cleaned.tif	31	372.586	1253.82
2018_11_22_hela_spreading_confinement_20um_2_10_w3Phasics_s4__Phase_Cleaned.tif	32	348.501	1266.09
2018_11_22_hela_spreading_confinement_20um_2_10_w3Phasics_s4__Phase_Cleaned.tif	33	278.64	1334.6
2018_11_22_hela_spreading_confinement_20um_2_9_w3Phasics_s3__Phase_Cleaned.tif	3	219.828	945.236
2018_11_22_hela_spreading_confinement_20um_2_9_w3Phasics_s3__Phase_Cleaned.tif	4	376.64	1582.8
2018_11_22_hela_spreading_confinement_20um_2_9_w3Phasics_s3__Phase_Cleaned.tif	5	288.755	1301.12
2018_11_22_hela_spreading_confinement_20um_2_9_w3Phasics_s3__Phase_Cleaned.tif	6	486.659	1825.53
2018_11_22_hela_spreading_confinement_20um_2_9_w3Phasics_s3__Phase_Cleaned.tif	8	267.672	715.948
2018_11_22_hela_spreading_confinement_20um_2_9_w3Phasics_s3__Phase_Cleaned.tif	10	258.666	940.166
2018_11_22_hela_spreading_confinement_20um_2_9_w3Phasics_s3__Phase_Cleaned.tif	11	265.569	1342.22
2018_11_22_hela_spreading_confinement_20um_2_9_w3Phasics_s3__Phase_Cleaned.tif	13	206.138	943.575
2018_11_22_hela_spreading_confinement_20um_2_9_w3Phasics_s3__Phase_Cleaned.tif	14	395.048	1418.18
2018_11_22_hela_spreading_confinement_20um_2_9_w3Phasics_s3__Phase_Cleaned.tif	15	375.822	1733.26
2018_11_22_hela_spreading_confinement_20um_2_9_w3Phasics_s3__Phase_Cleaned.tif	16	254.099	1324.83
2018_11_22_hela_spreading_confinement_20um_2_9_w3Phasics_s3__Phase_Cleaned.tif	17	360.649	1530.37
2018_11_22_hela_spreading_confinement_20um_2_9_w3Phasics_s3__Phase_Cleaned.tif	19	295.53	1243.86
2018_11_22_hela_spreading_confinement_20um_2_9_w3Phasics_s3__Phase_Cleaned.tif	20	304.57	1343.14
2018_11_22_hela_spreading_confinement_20um_2_9_w3Phasics_s3__Phase_Cleaned.tif	21	306.65	1646.25
2018_11_22_hela_spreading_confinement_20um_2_9_w3Phasics_s3__Phase_Cleaned.tif	23	289.795	989.784
2018_11_22_hela_spreading_confinement_20um_2_9_w3Phasics_s3__Phase_Cleaned.tif	25	235.457	884.702
2018_11_22_hela_spreading_confinement_20um_2_9_w3Phasics_s3__Phase_Cleaned.tif	26	475.784	1850.31
2018_11_22_hela_spreading_confinement_20um_2_9_w3Phasics_s3__Phase_Cleaned.tif	27	369.923	1465.36
2018_11_22_hela_spreading_confinement_20um_2_9_w3Phasics_s3__Phase_Cleaned.tif	28	364.305	1358.64
2018_11_22_hela_spreading_confinement_20um_2_9_w3Phasics_s3__Phase_Cleaned.tif	29	239.954	1017.17
2018_11_22_hela_spreading_confinement_20um_2_9_w3Phasics_s3__Phase_Cleaned.tif	30	331.599	1327.24
2018_11_22_hela_spreading_confinement_20um_2_9_w3Phasics_s3__Phase_Cleaned.tif	31	395.947	1653.99
2018_11_22_hela_spreading_confinement_20um_2_9_w3Phasics_s3__Phase_Cleaned.tif	32	377.527	1344.48
2018_11_22_hela_spreading_confinement_20um_2_9_w3Phasics_s3__Phase_Cleaned.tif	33	480.888	1790.43
2018_11_22_hela_spreading_confinement_20um_2_8_w3Phasics_s2__Phase_Cleaned.tif	1	321.694	1201.68
2018_11_22_hela_spreading_confinement_20um_2_8_w3Phasics_s2__Phase_Cleaned.tif	2	283.721	1130.52
2018_11_22_hela_spreading_confinement_20um_2_8_w3Phasics_s2__Phase_Cleaned.tif	3	265.557	1061.49
2018_11_22_hela_spreading_confinement_20um_2_8_w3Phasics_s2__Phase_Cleaned.tif	4	266.118	1076.78
2018_11_22_hela_spreading_confinement_20um_2_8_w3Phasics_s2__Phase_Cleaned.tif	5	248.551	775.066
2018_11_22_hela_spreading_confinement_20um_2_8_w3Phasics_s2__Phase_Cleaned.tif	7	227.526	1073.92
2018_11_22_hela_spreading_confinement_20um_2_8_w3Phasics_s2__Phase_Cleaned.tif	8	390.528	1478.13
2018_11_22_hela_spreading_confinement_20um_2_8_w3Phasics_s2__Phase_Cleaned.tif	9	253.526	1127.06
2018_11_22_hela_spreading_confinement_20um_2_8_w3Phasics_s2__Phase_Cleaned.tif	10	259.554	1124.4
2018_11_22_hela_spreading_confinement_20um_2_8_w3Phasics_s2__Phase_Cleaned.tif	11	244.124	1010.66
2018_11_22_hela_spreading_confinement_20um_2_8_w3Phasics_s2__Phase_Cleaned.tif	13	288.533	1030.66
2018_11_22_hela_spreading_confinement_20um_2_8_w3Phasics_s2__Phase_Cleaned.tif	14	450.192	2002.85
2018_11_22_hela_spreading_confinement_20um_2_8_w3Phasics_s2__Phase_Cleaned.tif	15	337.708	1609.27
2018_11_22_hela_spreading_confinement_20um_2_8_w3Phasics_s2__Phase_Cleaned.tif	16	264.121	1061.26
2018_11_22_hela_spreading_confinement_20um_2_8_w3Phasics_s2__Phase_Cleaned.tif	17	324.077	1573.65
2018_11_22_hela_spreading_confinement_20um_2_8_w3Phasics_s2__Phase_Cleaned.tif	18	308.927	1090.88
2018_11_22_hela_spreading_confinement_20um_2_8_w3Phasics_s2__Phase_Cleaned.tif	19	380.833	1760.1
2018_11_22_hela_spreading_confinement_20um_2_8_w3Phasics_s2__Phase_Cleaned.tif	20	336.342	1242.17
2018_11_22_hela_spreading_confinement_20um_2_8_w3Phasics_s2__Phase_Cleaned.tif	21	530.145	1824.44
2018_11_22_hela_spreading_confinement_20um_2_8_w3Phasics_s2__Phase_Cleaned.tif	22	463.555	2216.38
2018_11_22_hela_spreading_confinement_20um_2_8_w3Phasics_s2__Phase_Cleaned.tif	23	328.854	1369.89
2018_11_22_hela_spreading_confinement_20um_2_8_w3Phasics_s2__Phase_Cleaned.tif	24	364.807	900.485
2018_11_22_hela_spreading_confinement_20um_2_8_w3Phasics_s2__Phase_Cleaned.tif	25	243.785	984.752
2018_11_22_hela_spreading_confinement_20um_2_8_w3Phasics_s2__Phase_Cleaned.tif	26	304.5	1142.22
2018_11_22_hela_spreading_confinement_20um_2_8_w3Phasics_s2__Phase_Cleaned.tif	27	321.098	1359.09
2018_11_22_hela_spreading_confinement_20um_2_8_w3Phasics_s2__Phase_Cleaned.tif	29	380.062	1889.3
2018_11_22_hela_spreading_confinement_20um_2_8_w3Phasics_s2__Phase_Cleaned.tif	30	393.681	1536.72
2018_11_22_hela_spreading_confinement_20um_2_8_w3Phasics_s2__Phase_Cleaned.tif	32	311.228	1305.54
2018_11_22_hela_spreading_confinement_20um_2_8_w3Phasics_s2__Phase_Cleaned.tif	33	263.28	1001.74
2018_11_22_hela_spreading_confinement_20um_2_8_w3Phasics_s2__Phase_Cleaned.tif	34	239.218	921.083
2018_11_22_hela_spreading_confinement_20um_2_8_w3Phasics_s2__Phase_Cleaned.tif	35	357.74	1541.06
2018_11_22_hela_spreading_confinement_20um_2_8_w3Phasics_s2__Phase_Cleaned.tif	36	352.064	1353.6
2018_11_22_hela_spreading_confinement_20um_2_8_w3Phasics_s2__Phase_Cleaned.tif	37	210.18	719.445
2018_11_22_hela_spreading_confinement_20um_2_8_w3Phasics_s2__Phase_Cleaned.tif	38	298.111	1667.88
2018_11_22_hela_spreading_confinement_20um_2_8_w3Phasics_s2__Phase_Cleaned.tif	39	286.384	1342.18
2018_11_22_hela_spreading_confinement_20um_2_8_w3Phasics_s2__Phase_Cleaned.tif	40	251.459	1165
2018_11_22_hela_spreading_confinement_20um_2_8_w3Phasics_s2__Phase_Cleaned.tif	41	254.216	1316.73
2018_11_22_hela_spreading_confinement_20um_2_7_w3Phasics_s1__Phase_Cleaned.tif	1	279.936	1879.84
2018_11_22_hela_spreading_confinement_20um_2_7_w3Phasics_s1__Phase_Cleaned.tif	2	346.866	1105.73
2018_11_22_hela_spreading_confinement_20um_2_7_w3Phasics_s1__Phase_Cleaned.tif	3	354.33	1454.88
2018_11_22_hela_spreading_confinement_20um_2_7_w3Phasics_s1__Phase_Cleaned.tif	4	474.242	2180.47
2018_11_22_hela_spreading_confinement_20um_2_7_w3Phasics_s1__Phase_Cleaned.tif	5	453.486	1828.71
2018_11_22_hela_spreading_confinement_20um_2_7_w3Phasics_s1__Phase_Cleaned.tif	6	319.054	1673.67
2018_11_22_hela_spreading_confinement_20um_2_7_w3Phasics_s1__Phase_Cleaned.tif	7	273.278	1117.22
2018_11_22_hela_spreading_confinement_20um_2_7_w3Phasics_s1__Phase_Cleaned.tif	10	260.628	1066.83
2018_11_22_hela_spreading_confinement_20um_2_7_w3Phasics_s1__Phase_Cleaned.tif	11	444.55	1999.19
2018_11_22_hela_spreading_confinement_20um_2_7_w3Phasics_s1__Phase_Cleaned.tif	12	409.882	1997.27
2018_11_22_hela_spreading_confinement_20um_2_7_w3Phasics_s1__Phase_Cleaned.tif	14	337.603	1765.51
2018_11_22_hela_spreading_confinement_20um_2_7_w3Phasics_s1__Phase_Cleaned.tif	15	379.092	1530.4
2018_11_22_hela_spreading_confinement_20um_2_7_w3Phasics_s1__Phase_Cleaned.tif	16	331.015	1352.02
2018_11_22_hela_spreading_confinement_20um_2_7_w3Phasics_s1__Phase_Cleaned.tif	17	295.647	1079.4
2018_11_22_hela_spreading_confinement_20um_2_7_w3Phasics_s1__Phase_Cleaned.tif	18	508.793	2485.17
2018_11_22_hela_spreading_confinement_20um_2_7_w3Phasics_s1__Phase_Cleaned.tif	19	455.915	1617.3
2018_11_22_hela_spreading_confinement_20um_2_7_w3Phasics_s1__Phase_Cleaned.tif	20	244.03	1342.79
2018_11_22_hela_spreading_confinement_20um_2_7_w3Phasics_s1__Phase_Cleaned.tif	21	445.426	2174.15
2018_11_22_hela_spreading_confinement_20um_2_7_w3Phasics_s1__Phase_Cleaned.tif	22	331.728	1256.91

## Sheet: 20190402
	329.914	1285.19			323.887	1191.47			310.923	890.383				Volume							Mass
	63.8219	248.882			62.4482	252.608			65.6866	195.603				ctr 20 um	ctr 10 um	ctr 5um					ctr 20 um	ctr 10 um	ctr 5um
	37	37			174	174			64	64				1285.19	1191.47	890.383					329.914	323.887	310.923
c20	269.143	1013.2		c10	310.119	1084.82		c5	416.972	777.394				248.882	252.608	195.603					63.8219	62.4482	65.6866
	293.544	1250.45			272.402	804.003			328.165	761.018				47.8973	19.1501	24.4504					12.2825	4.73419	8.21082
	421.481	1856.98			271.982	937.732			302.328	745.51
	381.055	1195.41			309.383	926.457			364.702	786.613				100	92.7076	69.2802					100	98.1732	94.2437
	443.908	1437.44			337.545	1162.38			346.796	923.183				19.3653	19.6552	15.2198					19.345	18.9287	19.9102
	409.929	1551.63			268.443	970.526			393.962	797.237				3.72686	3.78265	2.92905					3.72295	1.43498	2.48878
	296.885	1143.62			345.838	1101.26			377.224	985.082
	280.228	995.921			350.463	911.03			265.149	642.634
	239.054	941.96			437.612	1553.5			346.842	902.714
	277.834	1101.12			424.53	1468.49			432.823	1201.52
	394.534	1499.41			352.718	1185.67			304.232	796.839
	246.238	957.169			358.102	1154.76			257.813	699.834
	443.884	1340.22			408.831	1242.14			274.33	802.628
	429.307	1555			273.512	1000.89			300.167	787.404
	335.512	1180.63			321.624	992.121			248.364	615.902
	267.146	1002.68			274.353	957.902			239.37	686.281
	312.7	1159.96			323.119	1127.97			242.091	699.183
	279.06	924.425			338.14	1143.31			203.172	606.462
	392.619	1549.48			255.279	986.642			313.821	852.589
	289.362	1109.84			328.154	1261.93			285.823	851.318
	260.208	1212.37			371.325	1218.63			345.768	877.061
	245.455	960.016			250.875	820.303			362.927	1315.94
	323.902	1390.33			248.889	893.02			202.015	998.303
	395.036	1427.32			420.769	1515.65			285.087	793.816
	339.951	1234.19			390.668	1316.48			348.232	906.366
	279.773	1194.6			291.909	1061.45			222.304	670.635
	419.414	1865.07			379.992	1287.28			300.015	852.964
	385.949	1532.03			288.276	1081.87			427.532	1221.08
	299.057	1235.3			465.996	1892.12			365.344	1087.99
	396.777	1522.79			280.45	985.762			443.534	1244.44
	281.034	1323.9			532.458	1838.4			257.755	1175.11
	300.879	1300.52			370.554	1285.86			344.95	803.704
	340.687	1579.81			357.869	1214.91			356.304	1094.32
	307.584	1241.59			496.716	1606.54			373.276	849.093
	330.665	1397.44			524.328	1764.21			249.193	914.95
	217.831	842.881			277.974	1071.54			267.602	1005.88
	379.174	1525.39			265.149	959.683			313.413	895.127
					276.222	1055.35			272.005	822.245
					482.851	1651.91			251.494	773.619
					396.578	1564.7			228.051	753.828
					339.04	1294.26			157.617	567.344
					293.836	1210.78			515.626	1624.68
					396.368	1339.93			400.176	1140.66
					355.801	1298.48			201.373	722.516
					245.222	1047.61			295.121	852.609
					258.923	1192.96			339.215	912.902
					465.587	1389.25			358.535	1087.55
					352.963	1220.25			307.572	849.578
					309.967	1092.38			247.277	810.46
					260.909	985.358			357.261	968.155
					394.628	1423.25			362.81	1202.04
					355.182	1261.73			234.067	747.761
					305.575	1039.69			324.92	1197.13
					282.763	991.404			284.02	778.332
					360.731	1112.49			308.969	968.521
					383.508	1331.19			306.147	731.928
					309.488	1026.16			339.577	1075.32
					381.335	1406.78			323.47	968.356
					308.472	932.106			250.583	665.163
					306.626	1079.5			336.155	797.352
					281.828	1070.02			295.74	888.523
					384.302	1043.84			257.241	668.181
					316.006	964.836			311.065	829.565
					275.801	810.587			323.575	952.099
					313.004	1002.11
					260.85	811.236
					290.075	841.109
					350.604	1019.51
					362.272	1302.78
					253.76	714.687
					388.145	974.046
					240.666	792.357
					308.121	1098.61
					252.347	994.611
					287.307	1037.18
					250.992	803.859
					256.4	991.714
					405.175	1229.2
					255.839	1060.52
					312.116	1065.69
					261.469	996.089
					352.963	1373
					443.242	1678.51
					449.398	1530.72
					405.946	1275.67
					354.143	1311.86
					398.821	1169.17
					354.353	999.16
					339.589	1166.84
					304.898	945.444
					289.222	1062
					230.049	859.349
					346.866	1135.57
					316.368	924.194
					196.654	795.974
					286.185	1019.99
					381.183	1178.76
					288.755	963.049
					292.551	1043.14
					248.305	784.381
					361.093	941.295
					249.123	843.002
					311.03	1110.91
					249.905	717.493
					260.698	1136.91
					269.377	893.372
					351.655	1046.29
					359.504	1053.67
					286.396	986.285
					349.984	1107.35
					383.741	1281.71
					361.478	1590.69
					408.761	1480.38
					351.55	1063.56
					343.046	1118.62
					366.01	1171.35
					295.086	918.668
					372.586	941.775
					319.837	1150.45
					324.089	1012.64
					381.954	1432.71
					359.866	1470.52
					348.174	1298.98
					315.001	1252.74
					379.361	1509.61
					383.917	1570.17
					258.082	1091.21
					250.595	1028.06
					345.92	1408.06
					379.887	1419.9
					265.663	905.382
					261.084	1039.3
					307.28	1324.11
					330.455	1235.34
					282.144	1107.43
					432.578	1753.22
					329.415	1389.9
					258.678	1191.58
					327.791	1216.37
					307.689	1099.37
					311.205	1207.57
					398.622	1286.22
					267.251	1112.93
					241.577	1310.01
					283.709	1383.65
					286.29	1423.52
					247.873	1299.63
					369.468	1897.44
					331.202	1723.1
					236.917	1178.42
					322.08	1741.1
					224.138	1246.56
					277.413	1469.91
					287.458	1536.49
					292.96	1470.45
					255.652	1255.46
					257.054	1393.42
					194.236	1253.02
					238.131	1424.08
					283.405	1664.28
					368.919	2014.5
					321.496	1438.74
					372.364	1275.03
					308.811	1162.8
					332.943	1075.1
					320.491	1195.94
					307.14	1323.17
					282.646	1018.05
					329.789	1227.85
					386.696	1586.45
					285.555	1152.57
					211.43	1010.82
					269.073	1085.21
					386.334	1585.81

## Sheet: all
20 µm	Mass	Volume		10 µm	Mass	Volume		5 µm	Mass	Volume			Volume					Mass
2018_11_22_hela_spreading_confinement_20um_2_12_w3Phasics_s6__Phase_Cleaned.tif	251.319	747.899		20190402	310.119	1084.82		2018_11_22_hela_spreading_confinement_5um_2__w3Phasics_s1__Phase_Cleaned.tif	331.482	906.885			20 µm	10 µm	5 µm			20 µm	10 µm	5 µm
2018_11_22_hela_spreading_confinement_20um_2_12_w3Phasics_s6__Phase_Cleaned.tif	299.116	1125.64		20190402	272.402	804.003		2018_11_22_hela_spreading_confinement_5um_2__w3Phasics_s1__Phase_Cleaned.tif	249.263	864.926		mean (µm3)	1318.54	1191.47	864.106		mean (pg)	325.241	323.887	304.747
2018_11_22_hela_spreading_confinement_20um_2_12_w3Phasics_s6__Phase_Cleaned.tif	407.71	971.171		20190402	271.982	937.732		2018_11_22_hela_spreading_confinement_5um_2__w3Phasics_s1__Phase_Cleaned.tif	336.085	1082.02		stdev	378.886	253.337	190.734		stdev	76.4569	62.6284	59.2427
2018_11_22_hela_spreading_confinement_20um_2_12_w3Phasics_s6__Phase_Cleaned.tif	337.603	960.706		20190402	309.383	926.457		2018_11_22_hela_spreading_confinement_5um_2__w3Phasics_s1__Phase_Cleaned.tif	293.416	777.923		n	192	174	113		n
2018_11_22_hela_spreading_confinement_20um_2_12_w3Phasics_s6__Phase_Cleaned.tif	258.386	1053.24		20190402	337.545	1162.38		2018_11_22_hela_spreading_confinement_5um_2__w3Phasics_s1__Phase_Cleaned.tif	298.789	715.296
2018_11_22_hela_spreading_confinement_20um_2_12_w3Phasics_s6__Phase_Cleaned.tif	289.304	939.458		20190402	268.443	970.526		2018_11_22_hela_spreading_confinement_5um_2__w3Phasics_s1__Phase_Cleaned.tif	302.188	819.752		%	100	90.3626	65.535			100	99.5836	93.6987
2018_11_22_hela_spreading_confinement_20um_2_12_w3Phasics_s6__Phase_Cleaned.tif	281.992	723.563		20190402	345.838	1101.26		2018_11_22_hela_spreading_confinement_5um_2__w3Phasics_s1__Phase_Cleaned.tif	296.815	754.11			28.7352	19.2134	14.4655			23.5078	19.256	18.215
2018_11_22_hela_spreading_confinement_20um_2_12_w3Phasics_s6__Phase_Cleaned.tif	287.388	1020.25		20190402	350.463	911.03		2018_11_22_hela_spreading_confinement_5um_2__w3Phasics_s1__Phase_Cleaned.tif	247.861	671.347		p-value compare with control		0.00016984	3.68431e-34				0.852513	0.00945194
2018_11_22_hela_spreading_confinement_20um_2_12_w3Phasics_s6__Phase_Cleaned.tif	270.533	786.684		20190402	437.612	1553.5		2018_11_22_hela_spreading_confinement_5um_2__w3Phasics_s1__Phase_Cleaned.tif	356.993	968.037
2018_11_22_hela_spreading_confinement_20um_2_12_w3Phasics_s6__Phase_Cleaned.tif	576.132	2336.22		20190402	424.53	1468.49		2018_11_22_hela_spreading_confinement_5um_2__w3Phasics_s1__Phase_Cleaned.tif	334.893	791.97
2018_11_22_hela_spreading_confinement_20um_2_12_w3Phasics_s6__Phase_Cleaned.tif	360.485	1507.6		20190402	352.718	1185.67		2018_11_22_hela_spreading_confinement_5um_2__w3Phasics_s1__Phase_Cleaned.tif	238.318	663.496
2018_11_22_hela_spreading_confinement_20um_2_12_w3Phasics_s6__Phase_Cleaned.tif	230.224	1017		20190402	358.102	1154.76		2018_11_22_hela_spreading_confinement_5um_2__w3Phasics_s1__Phase_Cleaned.tif	269.097	673.572
2018_11_22_hela_spreading_confinement_20um_2_12_w3Phasics_s6__Phase_Cleaned.tif	248.294	742.48		20190402	408.831	1242.14		2018_11_22_hela_spreading_confinement_5um_2__w3Phasics_s1__Phase_Cleaned.tif	261.901	772.722
2018_11_22_hela_spreading_confinement_20um_2_12_w3Phasics_s6__Phase_Cleaned.tif	301.919	819.912		20190402	273.512	1000.89		2018_11_22_hela_spreading_confinement_5um_2__w3Phasics_s1__Phase_Cleaned.tif	325.829	956.025
2018_11_22_hela_spreading_confinement_20um_2_12_w3Phasics_s6__Phase_Cleaned.tif	242.185	741.563		20190402	321.624	992.121		2018_11_22_hela_spreading_confinement_5um_2__w3Phasics_s1__Phase_Cleaned.tif	343.128	880.814
2018_11_22_hela_spreading_confinement_20um_2_12_w3Phasics_s6__Phase_Cleaned.tif	240.479	670.708		20190402	274.353	957.902		2018_11_22_hela_spreading_confinement_5um_2__w3Phasics_s1__Phase_Cleaned.tif	255.956	788.103
2018_11_22_hela_spreading_confinement_20um_2_12_w3Phasics_s6__Phase_Cleaned.tif	241.647	990.978		20190402	323.119	1127.97		2018_11_22_hela_spreading_confinement_5um_2__w3Phasics_s1__Phase_Cleaned.tif	307.631	879.959
2018_11_22_hela_spreading_confinement_20um_2_12_w3Phasics_s6__Phase_Cleaned.tif	437.133	662.517		20190402	338.14	1143.31		2018_11_22_hela_spreading_confinement_5um_2__w3Phasics_s1__Phase_Cleaned.tif	267.765	821.75
2018_11_22_hela_spreading_confinement_20um_2_12_w3Phasics_s6__Phase_Cleaned.tif	350.674	1030.87		20190402	255.279	986.642		2018_11_22_hela_spreading_confinement_5um_2_3_w3Phasics_s4__Phase_Cleaned.tif	232.455	658.862
2018_11_22_hela_spreading_confinement_20um_2_12_w3Phasics_s6__Phase_Cleaned.tif	306.066	1049.06		20190402	328.154	1261.93		2018_11_22_hela_spreading_confinement_5um_2_3_w3Phasics_s4__Phase_Cleaned.tif	232.455	658.862
2018_11_22_hela_spreading_confinement_20um_2_12_w3Phasics_s6__Phase_Cleaned.tif	393.109	930.914		20190402	371.325	1218.63		2018_11_22_hela_spreading_confinement_5um_2_3_w3Phasics_s4__Phase_Cleaned.tif	231.731	626.994
2018_11_22_hela_spreading_confinement_20um_2_12_w3Phasics_s6__Phase_Cleaned.tif	249.625	651.1		20190402	250.875	820.303		2018_11_22_hela_spreading_confinement_5um_2_3_w3Phasics_s4__Phase_Cleaned.tif	327.721	868.898
2018_11_22_hela_spreading_confinement_20um_2_12_w3Phasics_s6__Phase_Cleaned.tif	239.463	698.623		20190402	248.889	893.02		2018_11_22_hela_spreading_confinement_5um_2_3_w3Phasics_s4__Phase_Cleaned.tif	296.791	829.707
2018_11_22_hela_spreading_confinement_20um_2_12_w3Phasics_s6__Phase_Cleaned.tif	363.394	1091.63		20190402	420.769	1515.65		2018_11_22_hela_spreading_confinement_5um_2_3_w3Phasics_s4__Phase_Cleaned.tif	257.591	597.42
2018_11_22_hela_spreading_confinement_20um_2_12_w3Phasics_s6__Phase_Cleaned.tif	386.883	1378.55		20190402	390.668	1316.48		2018_11_22_hela_spreading_confinement_5um_2_3_w3Phasics_s4__Phase_Cleaned.tif	209.024	544.491
2018_11_22_hela_spreading_confinement_20um_2_11_w3Phasics_s5__Phase_Cleaned.tif	299.887	1229.96		20190402	291.909	1061.45		2018_11_22_hela_spreading_confinement_5um_2_3_w3Phasics_s4__Phase_Cleaned.tif	331.296	805.298
2018_11_22_hela_spreading_confinement_20um_2_11_w3Phasics_s5__Phase_Cleaned.tif	393.822	1573.58		20190402	379.992	1287.28		2018_11_22_hela_spreading_confinement_5um_2_3_w3Phasics_s4__Phase_Cleaned.tif	314.02	764.169
2018_11_22_hela_spreading_confinement_20um_2_11_w3Phasics_s5__Phase_Cleaned.tif	411.506	2062.5		20190402	288.276	1081.87		2018_11_22_hela_spreading_confinement_5um_2_3_w3Phasics_s4__Phase_Cleaned.tif	302.947	1283.56
2018_11_22_hela_spreading_confinement_20um_2_11_w3Phasics_s5__Phase_Cleaned.tif	252.253	1371.74		20190402	465.996	1892.12		2018_11_22_hela_spreading_confinement_5um_2_1_w3Phasics_s2__Phase_Cleaned.tif	372.633	1276
2018_11_22_hela_spreading_confinement_20um_2_11_w3Phasics_s5__Phase_Cleaned.tif	252.732	1341.74		20190402	280.45	985.762		2018_11_22_hela_spreading_confinement_5um_2_1_w3Phasics_s2__Phase_Cleaned.tif	336.248	1058.06
2018_11_22_hela_spreading_confinement_20um_2_11_w3Phasics_s5__Phase_Cleaned.tif	463.706	1798.23		20190402	532.458	1838.4		2018_11_22_hela_spreading_confinement_5um_2_1_w3Phasics_s2__Phase_Cleaned.tif	252.464	805.058
2018_11_22_hela_spreading_confinement_20um_2_11_w3Phasics_s5__Phase_Cleaned.tif	358.85	1956.99		20190402	370.554	1285.86		2018_11_22_hela_spreading_confinement_5um_2_1_w3Phasics_s2__Phase_Cleaned.tif	335.582	1069.19
2018_11_22_hela_spreading_confinement_20um_2_11_w3Phasics_s5__Phase_Cleaned.tif	321.659	1675.29		20190402	357.869	1214.91		2018_11_22_hela_spreading_confinement_5um_2_1_w3Phasics_s2__Phase_Cleaned.tif	287.692	805.443
2018_11_22_hela_spreading_confinement_20um_2_11_w3Phasics_s5__Phase_Cleaned.tif	509.704	2237.84		20190402	496.716	1606.54		2018_11_22_hela_spreading_confinement_5um_2_1_w3Phasics_s2__Phase_Cleaned.tif	378.357	1027.41
2018_11_22_hela_spreading_confinement_20um_2_11_w3Phasics_s5__Phase_Cleaned.tif	216.102	1038.14		20190402	524.328	1764.21		2018_11_22_hela_spreading_confinement_5um_2_1_w3Phasics_s2__Phase_Cleaned.tif	329.438	878.281
2018_11_22_hela_spreading_confinement_20um_2_11_w3Phasics_s5__Phase_Cleaned.tif	218.882	1069.81		20190402	277.974	1071.54		2018_11_22_hela_spreading_confinement_5um_2_1_w3Phasics_s2__Phase_Cleaned.tif	317.045	1055.38
2018_11_22_hela_spreading_confinement_20um_2_11_w3Phasics_s5__Phase_Cleaned.tif	225.283	991.556		20190402	265.149	959.683		2018_11_22_hela_spreading_confinement_5um_2_1_w3Phasics_s2__Phase_Cleaned.tif	323.224	721.615
2018_11_22_hela_spreading_confinement_20um_2_11_w3Phasics_s5__Phase_Cleaned.tif	295.46	1307.47		20190402	276.222	1055.35		2018_11_22_hela_spreading_confinement_5um_2_2_w3Phasics_s3__Phase_Cleaned.tif	318.669	916.015
2018_11_22_hela_spreading_confinement_20um_2_11_w3Phasics_s5__Phase_Cleaned.tif	398.073	1966.67		20190402	482.851	1651.91		2018_11_22_hela_spreading_confinement_5um_2_2_w3Phasics_s3__Phase_Cleaned.tif	311.301	915.077
2018_11_22_hela_spreading_confinement_20um_2_11_w3Phasics_s5__Phase_Cleaned.tif	305.353	1749.4		20190402	396.578	1564.7		2018_11_22_hela_spreading_confinement_5um_2_2_w3Phasics_s3__Phase_Cleaned.tif	364.468	968.693
2018_11_22_hela_spreading_confinement_20um_2_11_w3Phasics_s5__Phase_Cleaned.tif	255.372	1307		20190402	339.04	1294.26		2018_11_22_hela_spreading_confinement_5um_2_2_w3Phasics_s3__Phase_Cleaned.tif	321.627	1050.35
2018_11_22_hela_spreading_confinement_20um_2_11_w3Phasics_s5__Phase_Cleaned.tif	390.703	2183.81		20190402	293.836	1210.78		2018_11_22_hela_spreading_confinement_5um_2_2_w3Phasics_s3__Phase_Cleaned.tif	318.346	915.399
2018_11_22_hela_spreading_confinement_20um_2_11_w3Phasics_s5__Phase_Cleaned.tif	325.549	1297.9		20190402	396.368	1339.93		2018_11_22_hela_spreading_confinement_5um_2_2_w3Phasics_s3__Phase_Cleaned.tif	320.602	703.972
2018_11_22_hela_spreading_confinement_20um_2_11_w3Phasics_s5__Phase_Cleaned.tif	292.493	1257.82		20190402	355.801	1298.48		2018_11_22_hela_spreading_confinement_5um_2_4_w3Phasics_s5__Phase_Cleaned.tif	294.011	794.873
2018_11_22_hela_spreading_confinement_20um_2_10_w3Phasics_s4__Phase_Cleaned.tif	252.545	1159.41		20190402	245.222	1047.61		2018_11_22_hela_spreading_confinement_5um_2_4_w3Phasics_s5__Phase_Cleaned.tif	326.927	774.666
2018_11_22_hela_spreading_confinement_20um_2_10_w3Phasics_s4__Phase_Cleaned.tif	263.782	1056.6		20190402	258.923	1192.96		2018_11_22_hela_spreading_confinement_5um_2_4_w3Phasics_s5__Phase_Cleaned.tif	379.116	976.341
2018_11_22_hela_spreading_confinement_20um_2_10_w3Phasics_s4__Phase_Cleaned.tif	248.422	1196.56		20190402	465.587	1389.25		2018_11_22_hela_spreading_confinement_5um_2_4_w3Phasics_s5__Phase_Cleaned.tif	194.797	486.151
2018_11_22_hela_spreading_confinement_20um_2_10_w3Phasics_s4__Phase_Cleaned.tif	303.426	1243.88		20190402	352.963	1220.25		2018_11_22_hela_spreading_confinement_5um_2_4_w3Phasics_s5__Phase_Cleaned.tif	187.356	546.089
2018_11_22_hela_spreading_confinement_20um_2_10_w3Phasics_s4__Phase_Cleaned.tif	423.736	1926.49		20190402	309.967	1092.38		2018_11_22_hela_spreading_confinement_5um_2_4_w3Phasics_s5__Phase_Cleaned.tif	213.964	488.461
2018_11_22_hela_spreading_confinement_20um_2_10_w3Phasics_s4__Phase_Cleaned.tif	555.469	1295.03		20190402	260.909	985.358		20190402	416.972	777.394
2018_11_22_hela_spreading_confinement_20um_2_10_w3Phasics_s4__Phase_Cleaned.tif	282.997	927.773		20190402	394.628	1423.25		20190402	328.165	761.018
2018_11_22_hela_spreading_confinement_20um_2_10_w3Phasics_s4__Phase_Cleaned.tif	453.696	1926.66		20190402	355.182	1261.73		20190402	302.328	745.51
2018_11_22_hela_spreading_confinement_20um_2_10_w3Phasics_s4__Phase_Cleaned.tif	316.66	1293.27		20190402	305.575	1039.69		20190402	364.702	786.613
2018_11_22_hela_spreading_confinement_20um_2_10_w3Phasics_s4__Phase_Cleaned.tif	343.21	1951.01		20190402	282.763	991.404		20190402	346.796	923.183
2018_11_22_hela_spreading_confinement_20um_2_10_w3Phasics_s4__Phase_Cleaned.tif	386.953	1353.99		20190402	360.731	1112.49		20190402	393.962	797.237
2018_11_22_hela_spreading_confinement_20um_2_10_w3Phasics_s4__Phase_Cleaned.tif	209.502	1198.72		20190402	383.508	1331.19		20190402	377.224	985.082
2018_11_22_hela_spreading_confinement_20um_2_10_w3Phasics_s4__Phase_Cleaned.tif	234.242	1025.04		20190402	309.488	1026.16		20190402	265.149	642.634
2018_11_22_hela_spreading_confinement_20um_2_10_w3Phasics_s4__Phase_Cleaned.tif	261.247	818.292		20190402	381.335	1406.78		20190402	346.842	902.714
2018_11_22_hela_spreading_confinement_20um_2_10_w3Phasics_s4__Phase_Cleaned.tif	300.634	957.035		20190402	308.472	932.106		20190402	432.823	1201.52
2018_11_22_hela_spreading_confinement_20um_2_10_w3Phasics_s4__Phase_Cleaned.tif	217.539	1088.67		20190402	306.626	1079.5		20190402	304.232	796.839
2018_11_22_hela_spreading_confinement_20um_2_10_w3Phasics_s4__Phase_Cleaned.tif	416.412	1610.38		20190402	281.828	1070.02		20190402	257.813	699.834
2018_11_22_hela_spreading_confinement_20um_2_10_w3Phasics_s4__Phase_Cleaned.tif	230.598	1038.91		20190402	384.302	1043.84		20190402	274.33	802.628
2018_11_22_hela_spreading_confinement_20um_2_10_w3Phasics_s4__Phase_Cleaned.tif	370.507	1481.65		20190402	316.006	964.836		20190402	300.167	787.404
2018_11_22_hela_spreading_confinement_20um_2_10_w3Phasics_s4__Phase_Cleaned.tif	234.674	933.681		20190402	275.801	810.587		20190402	248.364	615.902
2018_11_22_hela_spreading_confinement_20um_2_10_w3Phasics_s4__Phase_Cleaned.tif	330.618	1463.63		20190402	313.004	1002.11		20190402	239.37	686.281
2018_11_22_hela_spreading_confinement_20um_2_10_w3Phasics_s4__Phase_Cleaned.tif	309.827	986.506		20190402	260.85	811.236		20190402	242.091	699.183
2018_11_22_hela_spreading_confinement_20um_2_10_w3Phasics_s4__Phase_Cleaned.tif	372.329	2404.34		20190402	290.075	841.109		20190402	203.172	606.462
2018_11_22_hela_spreading_confinement_20um_2_10_w3Phasics_s4__Phase_Cleaned.tif	266.013	1201.86		20190402	350.604	1019.51		20190402	313.821	852.589
2018_11_22_hela_spreading_confinement_20um_2_10_w3Phasics_s4__Phase_Cleaned.tif	293.602	1155.68		20190402	362.272	1302.78		20190402	285.823	851.318
2018_11_22_hela_spreading_confinement_20um_2_10_w3Phasics_s4__Phase_Cleaned.tif	312.852	1308.6		20190402	253.76	714.687		20190402	345.768	877.061
2018_11_22_hela_spreading_confinement_20um_2_10_w3Phasics_s4__Phase_Cleaned.tif	234.838	1269.99		20190402	388.145	974.046		20190402	362.927	1315.94
2018_11_22_hela_spreading_confinement_20um_2_10_w3Phasics_s4__Phase_Cleaned.tif	372.586	1253.82		20190402	240.666	792.357		20190402	202.015	998.303
2018_11_22_hela_spreading_confinement_20um_2_10_w3Phasics_s4__Phase_Cleaned.tif	348.501	1266.09		20190402	308.121	1098.61		20190402	285.087	793.816
2018_11_22_hela_spreading_confinement_20um_2_10_w3Phasics_s4__Phase_Cleaned.tif	278.64	1334.6		20190402	252.347	994.611		20190402	348.232	906.366
2018_11_22_hela_spreading_confinement_20um_2_9_w3Phasics_s3__Phase_Cleaned.tif	219.828	945.236		20190402	287.307	1037.18		20190402	222.304	670.635
2018_11_22_hela_spreading_confinement_20um_2_9_w3Phasics_s3__Phase_Cleaned.tif	376.64	1582.8		20190402	250.992	803.859		20190402	300.015	852.964
2018_11_22_hela_spreading_confinement_20um_2_9_w3Phasics_s3__Phase_Cleaned.tif	288.755	1301.12		20190402	256.4	991.714		20190402	427.532	1221.08
2018_11_22_hela_spreading_confinement_20um_2_9_w3Phasics_s3__Phase_Cleaned.tif	486.659	1825.53		20190402	405.175	1229.2		20190402	365.344	1087.99
2018_11_22_hela_spreading_confinement_20um_2_9_w3Phasics_s3__Phase_Cleaned.tif	267.672	715.948		20190402	255.839	1060.52		20190402	443.534	1244.44
2018_11_22_hela_spreading_confinement_20um_2_9_w3Phasics_s3__Phase_Cleaned.tif	258.666	940.166		20190402	312.116	1065.69		20190402	257.755	1175.11
2018_11_22_hela_spreading_confinement_20um_2_9_w3Phasics_s3__Phase_Cleaned.tif	265.569	1342.22		20190402	261.469	996.089		20190402	344.95	803.704
2018_11_22_hela_spreading_confinement_20um_2_9_w3Phasics_s3__Phase_Cleaned.tif	206.138	943.575		20190402	352.963	1373		20190402	356.304	1094.32
2018_11_22_hela_spreading_confinement_20um_2_9_w3Phasics_s3__Phase_Cleaned.tif	395.048	1418.18		20190402	443.242	1678.51		20190402	373.276	849.093
2018_11_22_hela_spreading_confinement_20um_2_9_w3Phasics_s3__Phase_Cleaned.tif	375.822	1733.26		20190402	449.398	1530.72		20190402	249.193	914.95
2018_11_22_hela_spreading_confinement_20um_2_9_w3Phasics_s3__Phase_Cleaned.tif	254.099	1324.83		20190402	405.946	1275.67		20190402	267.602	1005.88
2018_11_22_hela_spreading_confinement_20um_2_9_w3Phasics_s3__Phase_Cleaned.tif	360.649	1530.37		20190402	354.143	1311.86		20190402	313.413	895.127
2018_11_22_hela_spreading_confinement_20um_2_9_w3Phasics_s3__Phase_Cleaned.tif	295.53	1243.86		20190402	398.821	1169.17		20190402	272.005	822.245
2018_11_22_hela_spreading_confinement_20um_2_9_w3Phasics_s3__Phase_Cleaned.tif	304.57	1343.14		20190402	354.353	999.16		20190402	251.494	773.619
2018_11_22_hela_spreading_confinement_20um_2_9_w3Phasics_s3__Phase_Cleaned.tif	306.65	1646.25		20190402	339.589	1166.84		20190402	228.051	753.828
2018_11_22_hela_spreading_confinement_20um_2_9_w3Phasics_s3__Phase_Cleaned.tif	289.795	989.784		20190402	304.898	945.444		20190402	157.617	567.344
2018_11_22_hela_spreading_confinement_20um_2_9_w3Phasics_s3__Phase_Cleaned.tif	235.457	884.702		20190402	289.222	1062		20190402	515.626	1624.68
2018_11_22_hela_spreading_confinement_20um_2_9_w3Phasics_s3__Phase_Cleaned.tif	475.784	1850.31		20190402	230.049	859.349		20190402	400.176	1140.66
2018_11_22_hela_spreading_confinement_20um_2_9_w3Phasics_s3__Phase_Cleaned.tif	369.923	1465.36		20190402	346.866	1135.57		20190402	201.373	722.516
2018_11_22_hela_spreading_confinement_20um_2_9_w3Phasics_s3__Phase_Cleaned.tif	364.305	1358.64		20190402	316.368	924.194		20190402	295.121	852.609
2018_11_22_hela_spreading_confinement_20um_2_9_w3Phasics_s3__Phase_Cleaned.tif	239.954	1017.17		20190402	196.654	795.974		20190402	339.215	912.902
2018_11_22_hela_spreading_confinement_20um_2_9_w3Phasics_s3__Phase_Cleaned.tif	331.599	1327.24		20190402	286.185	1019.99		20190402	358.535	1087.55
2018_11_22_hela_spreading_confinement_20um_2_9_w3Phasics_s3__Phase_Cleaned.tif	395.947	1653.99		20190402	381.183	1178.76		20190402	307.572	849.578
2018_11_22_hela_spreading_confinement_20um_2_9_w3Phasics_s3__Phase_Cleaned.tif	377.527	1344.48		20190402	288.755	963.049		20190402	247.277	810.46
2018_11_22_hela_spreading_confinement_20um_2_9_w3Phasics_s3__Phase_Cleaned.tif	480.888	1790.43		20190402	292.551	1043.14		20190402	357.261	968.155
2018_11_22_hela_spreading_confinement_20um_2_8_w3Phasics_s2__Phase_Cleaned.tif	321.694	1201.68		20190402	248.305	784.381		20190402	362.81	1202.04
2018_11_22_hela_spreading_confinement_20um_2_8_w3Phasics_s2__Phase_Cleaned.tif	283.721	1130.52		20190402	361.093	941.295		20190402	234.067	747.761
2018_11_22_hela_spreading_confinement_20um_2_8_w3Phasics_s2__Phase_Cleaned.tif	265.557	1061.49		20190402	249.123	843.002		20190402	324.92	1197.13
2018_11_22_hela_spreading_confinement_20um_2_8_w3Phasics_s2__Phase_Cleaned.tif	266.118	1076.78		20190402	311.03	1110.91		20190402	284.02	778.332
2018_11_22_hela_spreading_confinement_20um_2_8_w3Phasics_s2__Phase_Cleaned.tif	248.551	775.066		20190402	249.905	717.493		20190402	308.969	968.521
2018_11_22_hela_spreading_confinement_20um_2_8_w3Phasics_s2__Phase_Cleaned.tif	227.526	1073.92		20190402	260.698	1136.91		20190402	306.147	731.928
2018_11_22_hela_spreading_confinement_20um_2_8_w3Phasics_s2__Phase_Cleaned.tif	390.528	1478.13		20190402	269.377	893.372		20190402	339.577	1075.32
2018_11_22_hela_spreading_confinement_20um_2_8_w3Phasics_s2__Phase_Cleaned.tif	253.526	1127.06		20190402	351.655	1046.29		20190402	323.47	968.356
2018_11_22_hela_spreading_confinement_20um_2_8_w3Phasics_s2__Phase_Cleaned.tif	259.554	1124.4		20190402	359.504	1053.67		20190402	250.583	665.163
2018_11_22_hela_spreading_confinement_20um_2_8_w3Phasics_s2__Phase_Cleaned.tif	244.124	1010.66		20190402	286.396	986.285		20190402	336.155	797.352
2018_11_22_hela_spreading_confinement_20um_2_8_w3Phasics_s2__Phase_Cleaned.tif	288.533	1030.66		20190402	349.984	1107.35		20190402	295.74	888.523
2018_11_22_hela_spreading_confinement_20um_2_8_w3Phasics_s2__Phase_Cleaned.tif	450.192	2002.85		20190402	383.741	1281.71		20190402	257.241	668.181
2018_11_22_hela_spreading_confinement_20um_2_8_w3Phasics_s2__Phase_Cleaned.tif	337.708	1609.27		20190402	361.478	1590.69		20190402	311.065	829.565
2018_11_22_hela_spreading_confinement_20um_2_8_w3Phasics_s2__Phase_Cleaned.tif	264.121	1061.26		20190402	408.761	1480.38		20190402	323.575	952.099
2018_11_22_hela_spreading_confinement_20um_2_8_w3Phasics_s2__Phase_Cleaned.tif	324.077	1573.65		20190402	351.55	1063.56
2018_11_22_hela_spreading_confinement_20um_2_8_w3Phasics_s2__Phase_Cleaned.tif	308.927	1090.88		20190402	343.046	1118.62
2018_11_22_hela_spreading_confinement_20um_2_8_w3Phasics_s2__Phase_Cleaned.tif	380.833	1760.1		20190402	366.01	1171.35
2018_11_22_hela_spreading_confinement_20um_2_8_w3Phasics_s2__Phase_Cleaned.tif	336.342	1242.17		20190402	295.086	918.668
2018_11_22_hela_spreading_confinement_20um_2_8_w3Phasics_s2__Phase_Cleaned.tif	530.145	1824.44		20190402	372.586	941.775
2018_11_22_hela_spreading_confinement_20um_2_8_w3Phasics_s2__Phase_Cleaned.tif	463.555	2216.38		20190402	319.837	1150.45
2018_11_22_hela_spreading_confinement_20um_2_8_w3Phasics_s2__Phase_Cleaned.tif	328.854	1369.89		20190402	324.089	1012.64
2018_11_22_hela_spreading_confinement_20um_2_8_w3Phasics_s2__Phase_Cleaned.tif	364.807	900.485		20190402	381.954	1432.71
2018_11_22_hela_spreading_confinement_20um_2_8_w3Phasics_s2__Phase_Cleaned.tif	243.785	984.752		20190402	359.866	1470.52
2018_11_22_hela_spreading_confinement_20um_2_8_w3Phasics_s2__Phase_Cleaned.tif	304.5	1142.22		20190402	348.174	1298.98
2018_11_22_hela_spreading_confinement_20um_2_8_w3Phasics_s2__Phase_Cleaned.tif	321.098	1359.09		20190402	315.001	1252.74
2018_11_22_hela_spreading_confinement_20um_2_8_w3Phasics_s2__Phase_Cleaned.tif	380.062	1889.3		20190402	379.361	1509.61
2018_11_22_hela_spreading_confinement_20um_2_8_w3Phasics_s2__Phase_Cleaned.tif	393.681	1536.72		20190402	383.917	1570.17
2018_11_22_hela_spreading_confinement_20um_2_8_w3Phasics_s2__Phase_Cleaned.tif	311.228	1305.54		20190402	258.082	1091.21
2018_11_22_hela_spreading_confinement_20um_2_8_w3Phasics_s2__Phase_Cleaned.tif	263.28	1001.74		20190402	250.595	1028.06
2018_11_22_hela_spreading_confinement_20um_2_8_w3Phasics_s2__Phase_Cleaned.tif	239.218	921.083		20190402	345.92	1408.06
2018_11_22_hela_spreading_confinement_20um_2_8_w3Phasics_s2__Phase_Cleaned.tif	357.74	1541.06		20190402	379.887	1419.9
2018_11_22_hela_spreading_confinement_20um_2_8_w3Phasics_s2__Phase_Cleaned.tif	352.064	1353.6		20190402	265.663	905.382
2018_11_22_hela_spreading_confinement_20um_2_8_w3Phasics_s2__Phase_Cleaned.tif	210.18	719.445		20190402	261.084	1039.3
2018_11_22_hela_spreading_confinement_20um_2_8_w3Phasics_s2__Phase_Cleaned.tif	298.111	1667.88		20190402	307.28	1324.11
2018_11_22_hela_spreading_confinement_20um_2_8_w3Phasics_s2__Phase_Cleaned.tif	286.384	1342.18		20190402	330.455	1235.34
2018_11_22_hela_spreading_confinement_20um_2_8_w3Phasics_s2__Phase_Cleaned.tif	251.459	1165		20190402	282.144	1107.43
2018_11_22_hela_spreading_confinement_20um_2_8_w3Phasics_s2__Phase_Cleaned.tif	254.216	1316.73		20190402	432.578	1753.22
2018_11_22_hela_spreading_confinement_20um_2_7_w3Phasics_s1__Phase_Cleaned.tif	279.936	1879.84		20190402	329.415	1389.9
2018_11_22_hela_spreading_confinement_20um_2_7_w3Phasics_s1__Phase_Cleaned.tif	346.866	1105.73		20190402	258.678	1191.58
2018_11_22_hela_spreading_confinement_20um_2_7_w3Phasics_s1__Phase_Cleaned.tif	354.33	1454.88		20190402	327.791	1216.37
2018_11_22_hela_spreading_confinement_20um_2_7_w3Phasics_s1__Phase_Cleaned.tif	474.242	2180.47		20190402	307.689	1099.37
2018_11_22_hela_spreading_confinement_20um_2_7_w3Phasics_s1__Phase_Cleaned.tif	453.486	1828.71		20190402	311.205	1207.57
2018_11_22_hela_spreading_confinement_20um_2_7_w3Phasics_s1__Phase_Cleaned.tif	319.054	1673.67		20190402	398.622	1286.22
2018_11_22_hela_spreading_confinement_20um_2_7_w3Phasics_s1__Phase_Cleaned.tif	273.278	1117.22		20190402	267.251	1112.93
2018_11_22_hela_spreading_confinement_20um_2_7_w3Phasics_s1__Phase_Cleaned.tif	260.628	1066.83		20190402	241.577	1310.01
2018_11_22_hela_spreading_confinement_20um_2_7_w3Phasics_s1__Phase_Cleaned.tif	444.55	1999.19		20190402	283.709	1383.65
2018_11_22_hela_spreading_confinement_20um_2_7_w3Phasics_s1__Phase_Cleaned.tif	409.882	1997.27		20190402	286.29	1423.52
2018_11_22_hela_spreading_confinement_20um_2_7_w3Phasics_s1__Phase_Cleaned.tif	337.603	1765.51		20190402	247.873	1299.63
2018_11_22_hela_spreading_confinement_20um_2_7_w3Phasics_s1__Phase_Cleaned.tif	379.092	1530.4		20190402	369.468	1897.44
2018_11_22_hela_spreading_confinement_20um_2_7_w3Phasics_s1__Phase_Cleaned.tif	331.015	1352.02		20190402	331.202	1723.1
2018_11_22_hela_spreading_confinement_20um_2_7_w3Phasics_s1__Phase_Cleaned.tif	295.647	1079.4		20190402	236.917	1178.42
2018_11_22_hela_spreading_confinement_20um_2_7_w3Phasics_s1__Phase_Cleaned.tif	508.793	2485.17		20190402	322.08	1741.1
2018_11_22_hela_spreading_confinement_20um_2_7_w3Phasics_s1__Phase_Cleaned.tif	455.915	1617.3		20190402	224.138	1246.56
2018_11_22_hela_spreading_confinement_20um_2_7_w3Phasics_s1__Phase_Cleaned.tif	244.03	1342.79		20190402	277.413	1469.91
2018_11_22_hela_spreading_confinement_20um_2_7_w3Phasics_s1__Phase_Cleaned.tif	445.426	2174.15		20190402	287.458	1536.49
2018_11_22_hela_spreading_confinement_20um_2_7_w3Phasics_s1__Phase_Cleaned.tif	331.728	1256.91		20190402	292.96	1470.45
20190402	269.143	1013.2		20190402	255.652	1255.46
20190402	293.544	1250.45		20190402	257.054	1393.42
20190402	421.481	1856.98		20190402	194.236	1253.02
20190402	381.055	1195.41		20190402	238.131	1424.08
20190402	443.908	1437.44		20190402	283.405	1664.28
20190402	409.929	1551.63		20190402	368.919	2014.5
20190402	296.885	1143.62		20190402	321.496	1438.74
20190402	280.228	995.921		20190402	372.364	1275.03
20190402	239.054	941.96		20190402	308.811	1162.8
20190402	277.834	1101.12		20190402	332.943	1075.1
20190402	394.534	1499.41		20190402	320.491	1195.94
20190402	246.238	957.169		20190402	307.14	1323.17
20190402	443.884	1340.22		20190402	282.646	1018.05
20190402	429.307	1555		20190402	329.789	1227.85
20190402	335.512	1180.63		20190402	386.696	1586.45
20190402	267.146	1002.68		20190402	285.555	1152.57
20190402	312.7	1159.96		20190402	211.43	1010.82
20190402	279.06	924.425		20190402	269.073	1085.21
20190402	392.619	1549.48		20190402	386.334	1585.81
20190402	289.362	1109.84
20190402	260.208	1212.37
20190402	245.455	960.016
20190402	323.902	1390.33
20190402	395.036	1427.32
20190402	339.951	1234.19
20190402	279.773	1194.6
20190402	419.414	1865.07
20190402	385.949	1532.03
20190402	299.057	1235.3
20190402	396.777	1522.79
20190402	281.034	1323.9
20190402	300.879	1300.52
20190402	340.687	1579.81
20190402	307.584	1241.59
20190402	330.665	1397.44
20190402	217.831	842.881
20190402	379.174	1525.39
