# Supplementary material for: A mechano-osmotic feedback couples cell volume to the rate of cell deformation
Source: eLife journal article supplement (doi:10.7554/elife.72381), 2022-04-13
Supplement: supp [file M_V_D_exp1.xlsx]

## Sheet: volume
1677.15	1869.66	1523.88	1426.24	1735.09	1250.97	1717.49	1340.53	1433.41	1635.3	1654.76	2233.63	1514.69	1781.38	1658.83	1174.63	1387.05		µm3
Volume	Volume	Volume	Volume	Volume	Volume	Volume	Volume	Volume	Volume	Volume	Volume	Volume	Volume	Volume	Volume	Volume							Volume	Volume	Volume	Volume	Volume	Volume	Volume	Volume	Volume	Volume	Volume	Volume	Volume	Volume	Volume	Volume	Volume
100	100	100	100	100	100	100	100	100	100	100	100	100	100	100	100	100		100	9.11895e-15	17	0		1677.15	1869.66	1523.88	1426.24	1735.09	1250.97	1717.49	1340.53	1433.41	1635.3	1654.76	2233.63	1514.69	1781.38	1658.83	1174.63	1387.05
100.062	99.2992	100.614	98.3437	99.0258	97.1671	101.198	98.6745	99.859	98.9174	99.0773	99.2256	97.5161	100.225	99.3117	100.702	100.374		99.3877	1.0677	17	1		1678.18	1856.56	1533.23	1402.62	1718.18	1215.53	1738.07	1322.76	1431.39	1617.6	1639.49	2216.33	1477.07	1785.39	1647.42	1182.88	1392.24
98.5314	98.3157	99.4684	97.8109	97.8697	95.4344	99.8827	97.4624	99.235	98.3359	99.182	98.1879	97.2093	99.6859	100.165	100.366	100.461		98.6826	1.28261	17	2		1652.52	1838.17	1515.78	1395.02	1698.12	1193.86	1715.47	1306.51	1422.45	1608.09	1641.22	2193.15	1472.42	1775.79	1661.57	1178.93	1393.45
99.0947	98.3325	98.9387	96.8582	97.4375	96.8311	99.0241	97.0634	98.683	98.1493	97.5472	97.0309	97.7904	99.5435	99.4167	99.0115	100.439		98.3054	1.04476	17	3		1661.96	1838.48	1507.7	1381.43	1690.63	1211.33	1700.73	1301.17	1414.54	1605.04	1614.17	2167.31	1481.23	1773.25	1649.16	1163.02	1393.14
99.3622	97.6423	99.085	95.9363	96.2716	95.1085	99.4001	95.2872	97.5512	98.0995	96.8526	96.1145	94.8558	99.7501	98.7726	96.6555	98.7227		97.3805	1.58151	17	4		1666.45	1825.58	1509.93	1368.28	1670.4	1189.78	1707.18	1277.35	1398.31	1604.22	1602.68	2146.84	1436.78	1776.93	1638.47	1135.35	1369.34
100.437	97.2229	98.4679	95.4008	95.5227	94.1595	98.5079	96.7543	96.8142	97.5336	97.3488	95.0851	95.1688	99.0494	97.305	96.2609	98.7216		97.0447	1.61587	17	5		1684.47	1817.74	1500.53	1360.64	1657.4	1177.91	1691.86	1297.02	1387.75	1594.97	1610.89	2123.85	1441.52	1764.45	1614.13	1130.71	1369.32
98.9976	97.0293	97.5085	94.4628	95.1155	94.232	97.7452	96.1928	97.6324	98.1977	96.8206	94.9825	94.1944	99.5097	97.2844	95.3841	97.2704		96.6212	1.60036	17	6		1660.34	1814.12	1485.91	1347.26	1650.34	1178.82	1678.76	1289.49	1399.48	1605.83	1602.15	2121.56	1426.76	1772.65	1613.79	1120.41	1349.19
99.211	96.0078	96.294	94.819	94.8533	94.4859	97.6035	95.3435	96.9934	98.6746	96.3279	93.8753	94.4894	99.1067	96.4467	96.7435	97.5732		96.4029	1.60084	17	7		1663.92	1795.02	1467.4	1352.35	1645.79	1181.99	1676.33	1278.11	1390.32	1613.63	1593.99	2096.83	1431.23	1765.47	1599.89	1136.38	1353.39
99.413	96.6774	96.2312	94.5987	94.4894	93.2772	97.8104	94.5857	96.0531	99.3932	96.6531	93.8035	94.0295	99.3736	95.5987	97.006	97.3104		96.2532	1.924	17	8		1667.3	1807.54	1466.45	1349.2	1639.47	1166.87	1679.88	1267.95	1376.84	1625.38	1599.37	2095.22	1424.26	1770.22	1585.82	1139.46	1349.75
99.7085	96.4234	96.1818	93.94	95.0677	94.1367	97.0039	94.325	95.8561	99.5314	97.969	93.0574	94.408	100.084	95.5676	96.2665	97.7271		96.309	2.06113	17	9		1672.26	1802.79	1465.69	1339.81	1649.51	1177.63	1666.03	1264.46	1374.01	1627.64	1621.15	2078.56	1429.99	1782.88	1585.31	1130.78	1355.53
100.985	96.7924	95.2012	93.4201	94.6674	93.8974	96.5273	94.3987	96.1978	99.7505	97.2498	93.1652	94.5678	100.131	95.2828	95.9412	97.5514		96.2192	2.2588	17	10		1693.67	1809.69	1450.75	1332.39	1642.56	1174.63	1657.84	1265.44	1378.91	1631.22	1609.25	2080.97	1432.41	1783.71	1580.58	1126.96	1353.09
101.138	97.0118	95.9325	92.8274	94.3037	93.2146	97.0156	94.7245	96.274	100.243	97.8631	93.0687	94.3936	99.9407	95.6238	96.6293	97.1524		96.3151	2.4158	17	11		1696.23	1813.79	1461.89	1323.94	1636.25	1166.09	1666.23	1269.81	1380	1639.28	1619.4	2078.81	1429.78	1780.33	1586.24	1135.04	1347.55
100.481	96.4411	94.0881	93.7319	94.0285	92.9271	97.3428	95.5322	95.841	101.196	98.2709	92.9916	96.0085	99.8411	95.8817	97.0043	97.7123		96.4306	2.44001	17	12		1685.22	1803.12	1433.79	1336.84	1631.48	1162.49	1671.85	1280.64	1373.8	1654.86	1626.15	2077.09	1454.24	1778.55	1590.52	1139.44	1355.32
100.779	97.0892	94.2966	94.2966	94.3208	90.951	97.5427	95.2571	95.5332	100.944	99.1698	92.8467	96.3965	100.079	95.7739	97.3495	97.9202		96.5027	2.69843	17	13		1690.21	1815.24	1436.96	1344.89	1636.55	1137.77	1675.28	1276.95	1369.39	1650.74	1641.02	2073.85	1460.11	1782.79	1588.73	1143.5	1358.2
100.067	96.8816	94.8027	93.5891	93.9146	90.2881	96.6388	94.7211	94.8234	101.37	99.2725	93.7785	98.3006	99.8065	95.7855	97.5372	97.3239		96.4059	2.77157	17	14		1678.26	1811.36	1444.68	1334.8	1629.5	1129.48	1659.76	1269.77	1359.21	1657.7	1642.72	2094.67	1488.95	1777.94	1588.92	1145.7	1349.93
100.927	97.0377	93.3807	93.5128	93.4698	89.4175	96.822	94.9044	95.3372	102.079	100.383	94.7046	99.3933	99.5868	96.4152	99.8587	97.9155		96.7732	3.26506	17	15		1692.69	1814.28	1423.01	1333.72	1621.78	1118.59	1662.91	1272.22	1366.58	1669.3	1661.09	2115.35	1505.5	1774.02	1599.37	1172.97	1358.14
101.748	97.1078	93.7294	92.6134	93.669	87.0073	96.9467	94.2889	94.1376	101.404	100.696	95.3419	101.376	99.4435	96.2889	99.0799	97.2122		96.5936	3.77286	17	16		1706.47	1815.59	1428.32	1320.89	1625.24	1088.44	1665.05	1263.97	1349.38	1658.26	1666.28	2129.59	1535.53	1771.47	1597.27	1163.82	1348.38
100.4	97.4985	92.139	93.4452	93.6353	86.9103	96.992	94.9514	94.0795	100.998	101.642	96.0633	102.253	99.6707	97.3487	100.669	97.7413		96.8493	3.91685	17	17		1683.85	1822.89	1404.09	1332.75	1624.65	1087.23	1665.83	1272.85	1348.55	1651.62	1681.93	2145.7	1548.82	1775.52	1614.85	1182.5	1355.72
100.305	97.7415	91.6141	93.1443	93.2277	86.8723	97.1371	94.6027	94.8903	102.192	102.289	97.4954	103.957	101.189	96.6532	100.294	98.9889		97.2114	4.32273	17	18		1682.27	1827.44	1396.09	1328.46	1617.58	1086.75	1668.32	1268.18	1360.17	1671.15	1692.64	2177.69	1574.64	1802.56	1603.32	1178.08	1373.03
100.63	97.2665	92.6673	92.8631	93.9293	84.3375	98.4566	95.4263	94.4586	103.109	103.18	97.7939	106.392	101.392	97.8861	100.559	98.4736		97.5777	4.99143	17	19		1687.71	1818.55	1412.14	1324.45	1629.75	1055.04	1690.98	1279.22	1353.98	1686.15	1707.37	2184.35	1611.51	1806.17	1623.77	1181.2	1365.88
101.29	98.1925	90.0627	92.6244	92.9933	85.6693	97.8532	95.8227	93.0323	103.283	102.765	97.968	108.38	100.483	97.7043	100.874	98.8664		97.5214	5.3084	17	20		1698.78	1835.87	1372.45	1321.04	1613.51	1071.7	1680.62	1284.53	1333.54	1688.99	1700.52	2188.24	1641.62	1789.98	1620.75	1184.9	1371.33
99.9363	97.7392	91.0015	91.8114	93.1907	85.0027	98.9149	94.8871	93.4543	103.179	104.846	98.8129	110.142	101.683	97.8199	102.219	99.0713		97.8653	5.78208	17	21		1676.08	1827.39	1386.75	1309.45	1616.94	1063.36	1698.85	1271.99	1339.59	1687.29	1734.94	2207.11	1668.32	1811.37	1622.67	1200.69	1374.17
100.287	98.5746	89.6121	91.3525	93.2927	85.3655	98.4869	96.1393	93.3869	103.495	105.705	100.034	112.917	101.607	97.8357	102.291	99.64		98.2366	6.30725	17	22		1681.97	1843.01	1365.58	1302.9	1618.71	1067.9	1691.5	1288.78	1338.62	1692.45	1749.16	2234.39	1710.35	1810.01	1622.93	1201.54	1382.06
100.369	97.3394	88.6841	91.4756	93.0107	84.5113	97.9939	95.5262	94.2186	104.077	106.088	101.049	114.743	102.118	99.0463	102.376	100.444		98.4158	6.83781	17	23		1683.33	1819.92	1351.44	1304.66	1613.82	1057.21	1683.03	1280.56	1350.54	1701.96	1755.5	2257.06	1738	1819.12	1643.01	1202.54	1393.21
99.4133	97.4063	86.6346	90.6699	93.3584	84.4129	98.7021	95.5811	92.8516	104.488	106.556	101.474	117.039	102.565	99.2923	102.108	99.0863		98.3317	7.48648	17	24		1667.31	1821.17	1320.2	1293.17	1619.85	1055.98	1695.2	1281.29	1330.95	1708.69	1763.25	2266.56	1772.78	1827.08	1647.1	1199.4	1374.38
99.2619	96.6598	86.8928	90.6374	92.7832	84.9418	99.8356	96.5703	93.0198	104.199	106.998	101.91	119.469	102.87	99.1439	101.962	100.065		98.6599	7.82936	17	25		1664.77	1807.21	1324.14	1292.7	1609.87	1062.6	1714.67	1294.55	1333.36	1703.96	1770.56	2276.28	1809.59	1832.5	1644.63	1197.68	1387.95
98.6065	96.1137	85.4861	90.4553	93.0494	84.5076		95.8414	93.8617	104.447	107.657	102.442	122.115	103.696	98.7801	100.916	99.5378		98.5946	8.73261	16	26		1653.78	1797	1302.7	1290.11	1614.49	1057.17	0	1284.78	1345.43	1708.02	1781.47	2288.17	1849.67	1847.22	1638.6	1185.4	1380.64
99.2724	96.1199	85.064	89.3726	93.1303	83.528		95.7321	93.5478	105.09	108.671	102.682	124.813	103.642	101.92		100.099		98.8456	9.83503	15	27		1664.94	1797.12	1296.27	1274.67	1615.89	1044.91	0	1283.32	1340.93	1718.54	1798.24	2293.55	1890.53	1846.25	1690.69	0	1388.42
98.312	96.1274	85.1259	89.191	93.1454	84.1071	100.911	95.6064	94.8188	104.741	109.032	102.71	126.851	104.146	102.402		99.4922		99.17	9.8331	16	28		1648.84	1797.26	1297.21	1272.08	1616.15	1052.16	1733.13	1281.63	1359.15	1712.84	1804.21	2294.16	1921.41	1855.24	1698.68	0	1380.01
98.743	96.789	84.5931	88.0339	92.7528	84.1689	100.678	95.9744	95.2258	105.394	110.144	106.252	129.178	104.07			100.602		99.5066	10.8651	15	29		1656.07	1809.63	1289.1	1255.57	1609.34	1052.93	1729.14	1286.57	1364.98	1723.51	1822.62	2373.28	1956.65	1853.88	0	0	1395.4
98.1279	97.1538	84.2228	88.1135	91.9915	83.8806	101.161	95.6737	95.8106	105.745	110.361	106.569	131.572	104.639			100.879		99.7267	11.4452	15	30		1645.75	1816.45	1283.45	1256.71	1596.13	1049.32	1737.43	1282.54	1373.36	1729.25	1826.21	2380.35	1992.91	1864.03	0	0	1399.25
97.3485	96.9605	84.9832	87.1395	91.6727	83.996	100.586	93.7382	96.2753	106.093	110.849	106.589	131.793	105.995			101.346		99.691	11.6374	15	31		1632.68	1812.83	1295.04	1242.82	1590.6	1050.77	1727.55	1256.59	1380.02	1734.94	1834.28	2380.81	1996.26	1888.18	0	0	1405.72
96.7774	96.6036	84.6097	88.3513	91.6986	84.3293	101.643	95.2997	96.8863	106.074	110.465	106.691	134.185	105.77			101.664		100.07	11.9422	15	32		1623.1	1806.16	1289.35	1260.1	1591.05	1054.94	1745.7	1277.52	1388.78	1734.63	1827.93	2383.07	2032.49	1884.17	0	0	1410.13
97.7361	97.2273	83.8379	87.115	90.5435	84.7992	101.508	96.7878	96.7912	106.987	112.15	107.698	137.241	105.952			99.9851		100.424	12.8031	15	33		1639.18	1817.82	1277.59	1242.47	1571.01	1060.82	1743.39	1297.47	1387.42	1749.57	1855.81	2405.57	2078.79	1887.41	0	0	1386.85
98.4267	97.943	85.3165	88.285	90.4829	86.0547	102.833	96.202	96.7037	106.251	112.877	107.547	137.514	106.043			99.3304		100.787	12.5823	15	34		1650.76	1831.2	1300.12	1259.15	1569.96	1076.52	1766.15	1289.62	1386.16	1737.53	1867.84	2402.21	2082.91	1889.03	0	0	1377.76
96.9568	98.3268	86.082	88.2086	90.5294	86.5656	103.44	95.7508	97.728	106.82	112.713	107.429		106.195			100.483		98.3734	8.08407	14	35		1626.11	1838.38	1311.78	1258.06	1570.76	1082.91	1776.58	1283.57	1400.85	1746.83	1865.13	2399.56	0	1891.74	0	0	1393.75
97.9407	98.7655	85.5801	87.5405	90.2103	86.6211	103.649	95.8406	98.3458	106.989	113.45	106.94		105.925			101.09		98.492	8.27864	14	36		1642.61	1846.58	1304.14	1248.54	1565.23	1083.61	1780.15	1284.77	1409.7	1749.59	1877.33	2388.65	0	1886.92	0	0	1402.17
	99.6777	85.0658	86.7523	89.5982	86.922	102.147	95.3231	98.1858	106.977	114.283	107.285					100.491		97.7257	8.90497	12	37		0	1863.64	1296.3	1237.29	1554.61	1087.37	1754.36	1277.84	1407.41	1749.4	1891.11	2396.35	0	0	0	0	1393.87
	100.028	84.9358	87.1753	88.9783	87.7143	103.765	95.3329	98.2289	106.302	114.391						100.867		97.0654	8.8202	11	38		0	1870.19	1294.32	1243.33	1543.85	1097.28	1782.16	1277.97	1408.03	1738.36	1892.89	0	0	0	0	0	1399.08
	100.364	85.798	86.3146	87.8265	88.3911	102.791	95.4192	99.0595	106.633	114.145								96.6743	9.13905	10	39		0	1876.47	1307.46	1231.05	1523.87	1105.75	1765.43	1279.12	1419.93	1743.77	1888.83	0	0	0	0	0	0
	101.703	85.4693	88.0442	87.9351	89.4783	103.079	95.7115	99.3924	106.353	115.147								97.2313	9.13587	10	40		0	1901.5	1302.45	1255.72	1525.75	1119.35	1770.37	1283.04	1424.7	1739.2	1905.41	0	0	0	0	0	0
	101.733	84.5897	86.2008	88.0629	86.6352		95.4052	99.7515	107.642	114.787								96.0897	10.0699	9	41		0	1902.07	1289.04	1229.43	1527.97	1083.78	0	1278.94	1429.85	1760.27	1899.45	0	0	0	0	0	0
	102.293	82.7603	85.6895	87.739	89.4091		96.3569	100.064	106.662	114.961								96.215	10.1232	9	42		0	1912.54	1261.17	1222.14	1522.35	1118.48	0	1291.69	1434.33	1744.24	1902.33	0	0	0	0	0	0
			87.2931	87.5715			95.602	100.808		114.744								97.2038	10.1413	5	43		0	0	0	1245.01	1519.44	0	0	1281.57	1445	0	1898.74	0	0	0	0	0	0
			87.1816	89.1559			97.1461	101.529		114.87								97.9765	9.93002	5	44		0	0	0	1243.42	1546.93	0	0	1302.27	1455.33	0	1900.82	0	0	0	0	0	0
			88.9906	88.3215			97.912	101.998		115.009								98.4463	9.78925	5	45		0	0	0	1269.22	1532.45	0	0	1312.54	1462.06	0	1903.12	0	0	0	0	0	0
			89.4967	88.7725			98.6195	101.255		114.677								98.564	9.43342	5	46		0	0	0	1276.44	1540.28	0	0	1322.02	1451.4	0	1897.62	0	0	0	0	0	0
			90.861	88.8811			98.2556	102.619		115.129								99.1492	9.4056	5	47		0	0	0	1295.89	1542.16	0	0	1317.15	1470.95	0	1905.11	0	0	0	0	0	0
			90.5727	89.1243			97.7577	102.186		115.163								98.9608	9.39663	5	48		0	0	0	1291.78	1546.38	0	0	1310.47	1464.75	0	1905.67	0	0	0	0	0	0
			91.3691	88.6559			99.9334	103.918		115.012								99.7777	9.41959	5	49		0	0	0	1303.14	1538.26	0	0	1339.64	1489.58	0	1903.16	0	0	0	0	0	0
			91.1747	88.9358			100.434	102.103		114.509								99.4312	9.09728	5	50		0	0	0	1300.37	1543.11	0	0	1346.35	1463.56	0	1894.84	0	0	0	0	0	0
			92.0143	88.5665			100.628	103.152		115.165								99.9052	9.32488	5	51		0	0	0	1312.34	1536.71	0	0	1348.95	1478.59	0	1905.71	0	0	0	0	0	0
			92.3021	88.9505			102.21	102.69		114.033								100.037	8.8361	5	52		0	0	0	1316.45	1543.37	0	0	1370.16	1471.97	0	1886.97	0	0	0	0	0	0
			91.8473	89.1295			101.824	103.917		113.661								100.076	8.83058	5	53		0	0	0	1309.96	1546.47	0	0	1364.99	1489.56	0	1880.81	0	0	0	0	0	0
			90.0995	88.9546			101.912	103.556		113.731								99.6505	9.21126	5	54		0	0	0	1285.03	1543.44	0	0	1366.16	1484.38	0	1881.96	0	0	0	0	0	0
			89.5494	89.0013			103.464			114.787								99.2006	10.7039	4	55		0	0	0	1277.19	1544.25	0	0	1386.97	0	0	1899.45	0	0	0	0	0	0
			88.9981	88.0239			103.471			114.05								98.6358	10.7991	4	56		0	0	0	1269.32	1527.29	0	0	1387.06	0	0	1887.26	0	0	0	0	0	0
			91.4474	87.241			103.653			114.479								99.205	10.6816	4	57		0	0	0	1304.26	1513.71	0	0	1389.5	0	0	1894.34	0	0	0	0	0	0
			91.1819	87.1931			104.811			114.215								99.3502	10.7854	4	58		0	0	0	1300.47	1512.88	0	0	1405.02	0	0	1889.98	0	0	0	0	0	0
			91.7312	87.3824			104.959			112.209								99.0705	9.97217	4	59		0	0	0	1308.3	1516.16	0	0	1407.01	0	0	1856.79	0	0	0	0	0	0
			92.6429	87.3978			104.653			113.056								99.4375	10.0474	4	60		0	0	0	1321.31	1516.43	0	0	1402.91	0	0	1870.81	0	0	0	0	0	0

## Sheet: dry mass
423.549	290.507	577.428	422.824	428.711	288.568	350.942	267.543	303.624	320.363	417.381	450.414	397.022	372.575	309.733	231.427	317.221		pg
Mass	Mass	Mass	Mass	Mass	Mass	Mass	Mass	Mass	Mass	Mass	Mass	Mass	Mass	Mass	Mass	Mass							Mass	Mass	Mass	Mass	Mass	Mass	Mass	Mass	Mass	Mass	Mass	Mass	Mass	Mass	Mass	Mass	Mass
100	100	100	100	100	100	100	100	100	100	100	100	100	100	100	100	100		100	3.44664e-15	17	0		423.549	290.507	577.428	422.824	428.711	288.568	350.942	267.543	303.624	320.363	417.381	450.414	397.022	372.575	309.733	231.427	317.221
99.3023	105.444	99.0594	99.0939	99.8501	95.2236	100.143	98.0179	97.6533	102.512	100.756	102.243	107.09	97.1941	102.285	98.3142	101.72		100.347	2.90187	17	1		420.593	306.323	571.997	418.993	428.069	274.785	351.445	262.24	296.499	328.411	420.535	460.518	425.172	362.121	316.812	227.526	322.675
101.109	105.935	94.9186	94.4695	101.033	96.4744	94.7412	97.7472	102.943	103.427	99.4127	102.972	110.944	97.2254	100.272	101.479	104.433		100.561	4.28892	17	2		428.244	307.748	548.087	399.44	433.138	278.394	332.487	261.516	312.56	331.342	414.93	463.8	440.474	362.237	310.574	234.849	331.284
99.3988	109.047	94.9186	94.4501	101.272	96.9277	96.9321	99.4586	105.721	103.099	99.3899	103.662	109.818	101.279	99.1477	102.7	100.578		101.047	4.22483	17	3		421.002	316.788	548.087	399.358	434.166	279.703	340.176	266.095	320.993	330.291	414.835	466.907	436	377.34	307.093	237.676	319.054
102.446	107.446	96.547	95.8038	97.3899	100.308	98.1336	98.1401	100.485	101.251	99.2136	103.039	104.416	100.511	102.127	103.604	104.923		100.928	3.09957	17	4		433.909	312.139	557.49	405.082	417.521	289.456	344.392	262.567	305.096	324.369	414.099	464.104	414.555	374.479	316.321	239.767	332.837
100.88	114.028	94.1964	98.9502	98.7603	94.8472	101.073	102.213	103.185	104.346	97.2043	101.071	103.633	98.7397	102.029	102.503	100.052		101.042	4.27862	17	5		427.275	331.261	543.917	418.386	423.397	273.699	354.709	273.465	313.296	334.286	405.712	455.238	411.448	367.879	316.017	237.22	317.384
100.394	107.937	93.3711	95.6656	95.4908	91.1597	99.1258	104.418	104.266	104.485	98.5413	101.514	99.9206	99.2821	101.927	98.6221	103.469		99.9759	4.23945	17	6		425.219	313.565	539.151	404.498	409.38	263.058	347.875	279.364	316.578	334.73	411.293	457.235	396.707	369.9	315.702	228.238	328.224
99.7656	110.848	94.2786	95.0689	95.529	85.5131	99.9812	105.208	108.237	111.073	100.848	103.244	106.325	104.276	99.0987	95.1194	108.358		101.34	6.66756	17	7		422.556	322.021	544.391	401.975	409.544	246.763	350.877	281.478	328.632	355.836	420.921	465.026	422.135	388.507	306.942	220.132	343.735
100.061	116.28	94.0498	97.7347	96.5098	103.562	98.8929	105.58	107.636	110.548	102.015	103.877	104.207	105.794	99.7737	106.082	102.228		103.225	5.24628	17	8		423.806	337.802	543.07	413.246	413.749	298.847	347.057	282.471	326.81	354.154	425.791	467.876	413.725	394.16	309.032	245.502	324.287
99.4209	122.375	92.7066	95.2899	98.2045	98.8464	101.383	100.733	102.22	103.427	100.537	104.173	101.524	103.565	100.656	100.717	96.3731		101.303	6.02942	17	9		421.096	355.509	535.314	402.909	421.014	285.239	355.796	269.505	310.364	331.342	419.624	469.208	403.073	385.855	311.766	233.085	305.715
97.2119	120.856	94.688	96.2955	96.7441	95.6325	101.583	94.9007	99.7807	103.847	103.792	101.361	108.856	101.072	97.4846	98.1224	107.902		101.184	6.42588	17	10		411.74	351.094	546.755	407.161	414.753	275.965	356.496	253.9	302.959	332.686	433.208	456.546	432.181	376.569	301.942	227.082	342.287
98.9493	119.517	98.7094	88.8174	105.302	89.5932	100.713	96.0052	102.366	105.407	100.862	101.193	98.5525	106.117	97.1829	101.282	103.005		100.798	6.62384	17	11		419.098	347.205	569.976	375.542	451.442	258.537	353.446	256.855	310.808	337.685	420.979	455.787	391.275	395.363	301.008	234.394	326.752
96.903	127.57	98.3428	95.3093	100	92.0795	102.584	94.0231	106.451	103.847	103.285	99.5488	99.7293	104.649	97.0547	100.198	107.629		101.718	7.69052	17	12		410.431	370.601	567.859	402.991	428.711	265.712	360.011	251.552	323.213	332.686	431.094	448.381	395.947	389.897	300.611	231.885	341.423
97.4711	112.456	94.2713	90.5439	102.43	94.4515	98.7452	98.2449	104.493	101.98	103.935	100.854	99.5499	105.047	98.6612	105.533	109.077		101.044	5.35452	17	13		412.838	326.693	544.349	382.842	439.13	272.557	346.539	262.848	317.267	326.705	433.804	454.261	395.235	391.38	305.587	244.232	346.013
97.1016	124.386	93.4824	91.3368	99.2616	96.4628	99.6139	90.4257	103.02	103.314	94.3386	103.887	102.726	108.308	101.441	100.643	103.509		100.78	7.56796	17	14		411.272	361.35	539.794	386.194	425.546	278.361	349.587	241.928	312.794	330.98	393.752	467.923	407.844	403.528	314.195	232.916	328.352
94.8705	140.943	96.7088	91.171	99.0192	96.3778	99.9417	95.8306	98.8613	101.466	103.705	103.156	101.287	109.775	98.9328	105.605	108.766		102.73	10.6548	17	15		401.823	409.45	558.424	385.493	424.506	278.115	350.738	256.388	300.167	325.058	432.846	464.629	402.131	408.995	306.428	244.398	345.028
101.542	117.14	99.4422	85.8891	100.741	96.8068	101.67	95.1888	103.158	101.163	106.708	104.383	103.077	100.778	99.0534	102.889	107.254		101.581	6.12247	17	16		430.078	340.301	574.207	363.16	431.889	279.354	356.801	254.671	313.214	324.089	445.38	470.154	409.24	375.471	306.801	238.114	340.231
96.6245	113.023	95.1214	88.8975	96.1938	96.3702	101.117	95.1768	105.259	104.051	102.023	101.149	103.024	104.518	95.9498	99.2076	106.909		100.271	5.54544	17	17		409.252	328.34	549.258	375.88	412.394	278.094	354.861	254.639	319.592	333.34	425.826	455.588	409.03	389.406	297.188	229.593	339.136
96.4149	120.667	95.1148	82.436	94.6517	95.9254	100.621	97.7352	98.492	104.058	94.2882	101.113	108.741	104.768	97.6204	96.4165	105.297		99.6682	7.74398	17	18		408.364	350.545	549.22	348.559	405.783	276.81	353.122	261.484	299.046	333.363	393.541	455.425	431.725	390.341	302.363	223.134	334.023
95.1132	113.683	96.725	83.7537	98.2535	94.3665	102.39	103.152	102.536	107.741	102.726	101.053	103.099	108.9	97.2772	98.93	107.683		101.022	6.64081	17	19		402.851	330.256	558.517	354.131	421.224	272.312	359.329	275.976	311.325	345.16	428.758	455.156	409.326	405.733	301.3	228.951	341.592
95.2373	109.69	95.3889	82.1045	99.5641	94.2967	98.5754	107.274	106.292	109.786	102.015	105.41	104.182	104.204	106.747	103.231	109.078		101.946	6.96043	17	20		403.376	318.657	550.802	347.158	426.843	272.11	345.943	287.003	322.729	351.713	425.791	474.78	413.624	388.238	330.63	238.905	346.019
102.841	117.177	97.3685	90.7207	90.6547	91.3864	101.266	98.0239	106.396	108.616	95.7434	100.835	106.228	106.903	101.392	105.11	108.117		101.693	6.98232	17	21		435.58	340.406	562.233	383.589	388.647	263.712	355.385	262.256	323.045	347.964	399.615	454.175	421.748	398.295	314.043	243.253	342.97
102.237	114.824	95.8738	94.9336	87.655	81.8377	105.374	98.4981	101.33	107.463	101.173	100.7	109.885	105.659	104.258	97.6934	106.619		100.942	7.75401	17	22		433.022	333.573	553.603	401.402	375.787	236.157	369.803	263.525	307.661	344.273	422.275	453.568	436.269	393.658	322.921	226.089	338.216
103.014	121.374	95.1173	88.3947	111.481	90.2327	99.6779	96.8915	106.92	107.409	94.6716	101.151	105.019	104.455	102.395	101.768	107.429		102.2	7.74882	17	23		436.315	352.601	549.234	373.754	477.933	260.383	349.812	259.227	324.636	344.097	395.142	455.6	416.949	389.173	317.15	235.519	340.786
103.682	111.479	98.2669	88.7152	104.169	92.714	98.6653	96.1842	105.42	112.043	95.8498	103.452	103.046	105.897	99.4381	101.677	104.402		101.476	5.91872	17	24		439.142	323.855	567.421	375.109	446.583	267.543	346.258	257.334	320.081	358.943	400.059	465.961	409.117	394.546	307.993	235.308	331.185
104.446	113.502	99.6546	90.8091	98.8993	97.3224	100.539	100.982	104.966	105.506	93.6781	105.109	102.604	102.85	96.7153	105.851	101.033		101.439	5.10539	17	25		442.378	329.73	575.434	383.963	423.992	280.841	352.835	270.171	318.702	338	390.995	473.425	407.359	383.192	299.56	244.968	320.497
103.207	109.988	98.3721	96.9447	95.6679	96.0311		99.3975	104.17	105.527	103.095	108.304	104.88	104.527	101.686	101.556	111.376		102.796	4.59157	16	26		437.133	319.522	568.028	409.906	410.139	277.115	0	265.931	316.285	338.07	430.3	487.815	416.399	389.441	314.954	235.027	353.308
103.88	110.177	93.6204	87.7262	96.3382	96.8412		102.523	104.293	105.823	98.5512	104.948	101.721	98.8275	96.3382		113.339		100.996	6.32147	15	27		439.983	320.071	540.591	370.928	413.013	279.453	0	274.294	316.658	339.016	411.334	472.7	403.855	368.206	298.391	0	359.535
108.968	107.84	106.52	92.265	104.577	98.8707	104.656	104.471	104.858	107.066	99.6292	106.128	107.579	98.6362	96.7078		105.931		103.419	4.59376	16	28		461.534	313.284	615.077	390.119	448.335	285.309	367.283	279.504	318.375	343	415.834	478.015	427.111	367.494	299.536	0	336.035
104.382	116.393	111.409	95.7319	94.668	94.4586	99.7637	99.4805	108.663	123.025	104.04	103.454	112.774	104.629			107.511		105.359	7.91402	15	29		442.109	338.129	643.309	404.778	405.853	272.577	350.113	266.153	329.927	394.125	434.244	465.972	447.739	389.822	0	0	341.046
101.693	114.073	113.076	92.3893	96.6106	86.3469	102.947	97.4591	108.328	115.412	103.695	99.6707	113.828	102.594			111.892		104.001	8.41716	15	30		430.72	331.389	652.934	390.644	414.181	249.17	361.284	260.745	328.911	369.736	432.803	448.93	451.921	382.239	0	0	354.943
106.842	94.0211	99.3451	92.8948	94.4555	81.2386	98.8517	108.618	109.956	115.812	105.721	106.131	119.112	101.821			108.862		102.912	9.4203	15	31		452.528	273.138	573.647	392.782	404.942	234.429	346.913	290.601	333.852	371.017	441.259	478.027	472.899	379.358	0	0	345.333
109.501	96.4939	103.334	91.2097	93.8806	81.777	101.388	105.797	113.249	118.223	101.923	101.657	119.406	104.452			106.539		103.255	9.62721	15	32		463.788	280.322	596.681	385.657	402.477	235.982	355.813	283.052	343.851	378.742	425.406	457.878	474.067	389.161	0	0	337.962
109.219	108.363	100.88	91.4804	92.6464	85.2864	111.586	108.767	107.72	118.123	103.005	100.013	123.289	97.5076			107.249		104.342	9.74794	15	33		462.597	314.803	582.512	386.802	397.186	246.109	391.602	290.998	327.066	378.422	429.923	450.472	489.485	363.289	0	0	340.217
113.411	127.84	91.0149	92.1296	96.112	96.4081	110.81	104.698	109.19	118.32	114.453	106.246	122.73	103.455			104.771		107.439	10.5	15	34		480.351	371.383	525.546	389.547	412.043	278.203	388.881	280.111	331.528	379.053	477.705	478.546	487.266	385.447	0	0	332.356
117.495	121.209	91.1282	95.4419	93.0551	98.0636	107.985	98.1227	106.532	117.421	102.338	104.891		100.335			103.626		104.117	8.96875	14	35		497.65	352.122	526.2	403.552	398.938	282.98	378.964	262.52	323.456	376.174	427.14	472.443	0	373.824	0	0	328.723
121.505	113.59	95.3924	91.6766	90.81	97.7474	112.694	101.227	109.632	118.825	99.8866	104.035		101.401			106.03		104.604	9.23849	14	36		514.634	329.987	550.823	387.631	389.313	282.068	395.492	270.825	332.871	380.669	416.908	468.589	0	377.796	0	0	336.35
	117.647	101.942	94.5965	94.777	87.6746	110.757	99.9738	110.144	119.788	102.71	105.192					104.55		104.146	9.04853	12	37		0	341.773	588.644	399.977	406.32	253.001	388.694	267.473	334.424	383.757	428.694	473.798	0	0	0	0	331.655
	141.514	99.6728	100.122	97.1828	87.2981	108.547	103.187	109.109	122.912	99.6152						108.196		107.032	13.841	11	38		0	411.109	575.539	423.338	416.634	251.915	380.938	276.07	331.282	393.763	415.775	0	0	0	0	0	343.218
	123.698	100.686	96.4529	98.0329	88.9334	110.322	107.046	112.768	116.396	95.1347								104.947	10.3343	10	39		0	359.352	581.391	407.827	420.278	256.633	387.168	286.396	342.391	372.89	397.075	0	0	0	0	0	0
	141.028	100.162	93.0661	95.6107	86.6019	112.55	110.723	108.748	123.11	96.3129								106.791	15.3805	10	40		0	409.695	578.365	393.506	409.894	249.905	394.985	296.231	330.184	394.397	401.992	0	0	0	0	0	0
	129.79	103.488	92.2705	95.5617	95.762		108.439	108.563	123.905	95.6637								105.938	12.5364	9	41		0	377.048	597.568	390.142	409.684	276.339	0	290.122	329.624	396.946	399.282	0	0	0	0	0	0
	143.127	106.617	92.6048	95.1421	95.3289		102.406	108.417	124.701	99.3213								107.518	15.5717	9	42		0	415.793	615.638	391.556	407.885	275.089	0	273.979	329.18	399.494	414.549	0	0	0	0	0	0
		102.405	100.008				107.588	108.013		96.9818								102.999	4.28254	5	43		0	0	591.316	422.859	0	0	0	287.844	327.953	0	404.784	0	0	0	0	0	0
		109.93	102.89				105.174	103.716		105.028								105.347	2.44286	5	44		0	0	634.768	435.042	0	0	0	281.385	314.906	0	438.365	0	0	0	0	0	0
		113.685	101.378				113.438	105.381		101.026								106.982	5.58652	5	45		0	0	656.447	428.653	0	0	0	303.496	319.964	0	421.662	0	0	0	0	0	0
		112.566	97.2983				100.109	107.997		100.544								103.703	5.6729	5	46		0	0	649.988	411.401	0	0	0	267.835	327.907	0	419.653	0	0	0	0	0	0
		112.076	96.9419				104.139	104.447		104.851								104.491	4.79132	5	47		0	0	647.161	409.894	0	0	0	278.616	317.126	0	437.629	0	0	0	0	0	0
		111.455	96.5883				90.2641	105.02		103.838								101.433	7.31183	5	48		0	0	643.575	408.399	0	0	0	241.495	318.866	0	433.401	0	0	0	0	0	0
		113.994	97.8066				100.017	102.204		93.4668								101.498	6.88433	5	49		0	0	658.234	413.55	0	0	0	267.59	310.316	0	390.113	0	0	0	0	0	0
		113.952	98.3563				99.7642	110.756		99.1898								104.404	6.58472	5	50		0	0	657.989	415.875	0	0	0	266.912	336.282	0	414	0	0	0	0	0	0
		115.293	100.075				99.5285	108.205		100.718								104.764	6.13955	5	51		0	0	665.733	423.14	0	0	0	266.282	328.537	0	420.377	0	0	0	0	0	0
		112.341	98.721				96.2104	108.405		98.8736								102.91	6.29087	5	52		0	0	648.691	417.416	0	0	0	257.404	329.145	0	412.68	0	0	0	0	0	0
		127.667	99.6547				93.3814	108.913		101.762								106.275	11.7899	5	53		0	0	737.183	421.364	0	0	0	249.835	330.687	0	424.734	0	0	0	0	0	0
		112.714	96.8535				96.599	106.489		104.359								103.403	6.1044	5	54		0	0	650.841	409.52	0	0	0	258.444	323.328	0	435.574	0	0	0	0	0	0
		115.064	97.7817				96.0358			104.893								103.444	7.48453	4	55		0	0	664.413	413.445	0	0	0	256.937	0	0	437.805	0	0	0	0	0	0
		114.652	98.6408				93.3464			104.423								102.765	7.90186	4	56		0	0	662.031	417.078	0	0	0	249.742	0	0	435.842	0	0	0	0	0	0
		125.864	95.8424				98.7601			102.786								105.813	11.8361	4	57		0	0	726.776	405.245	0	0	0	264.226	0	0	429.009	0	0	0	0	0	0
		120.198	93.3092				92.3248			100.726								101.64	11.1962	4	58		0	0	694.059	394.534	0	0	0	247.009	0	0	420.412	0	0	0	0	0	0
		124.133	93.8368				100.768			99.8503								104.647	11.5608	4	59		0	0	716.777	396.765	0	0	0	269.599	0	0	416.756	0	0	0	0	0	0
		123.906	92.2871				100.821			97.3484								103.591	12.1154	4	60		0	0	715.469	390.212	0	0	0	269.739	0	0	406.314	0	0	0	0	0	0

## Sheet: density
																																				0.252541	0.190637	0.229299	0.243691	0.225863	0.230675	0.204335	0.19958	0.211819	0.195904	0.252231	0.201651	0.262114	0.209149
Mass	Mass	Mass	Mass	Mass	Mass	Mass	Mass	Mass	Mass	Mass	Mass	Mass	Mass	Mass	Mass	Mass		Volume	Volume	Volume	Volume	Volume	Volume	Volume	Volume	Volume	Volume	Volume	Volume	Volume	Volume	Volume	Volume	Volume		density	density	density	density	density	density	density	density	density	density	density	density	density	density
423.549	290.507	577.428	422.824	428.711	288.568	350.942	267.543	303.624	320.363	417.381	450.414	397.022	372.575	309.733	231.427	317.221		1677.15	1869.66	1523.88	1426.24	1735.09	1250.97	1717.49	1340.53	1433.41	1635.3	1654.76	2233.63	1514.69	1781.38	1658.83	1174.63	1387.05		0.252541	0.15538	0.37892	0.296461	0.247084	0.230675	0.204335	0.19958	0.211819	0.195904	0.252231	0.201651	0.262114	0.209149
420.593	306.323	571.997	418.993	428.069	274.785	351.445	262.24	296.499	328.411	420.535	460.518	425.172	362.121	316.812	227.526	322.675		1678.18	1856.56	1533.23	1402.62	1718.18	1215.53	1738.07	1322.76	1431.39	1617.6	1639.49	2216.33	1477.07	1785.39	1647.42	1182.88	1392.24		0.250625	0.164995	0.373067	0.298723	0.249141	0.226061	0.202204	0.198252	0.20714	0.203024	0.256504	0.207784	0.287848	0.202825
428.244	307.748	548.087	399.44	433.138	278.394	332.487	261.516	312.56	331.342	414.93	463.8	440.474	362.237	310.574	234.849	331.284		1652.52	1838.17	1515.78	1395.02	1698.12	1193.86	1715.47	1306.51	1422.45	1608.09	1641.22	2193.15	1472.42	1775.79	1661.57	1178.93	1393.45		0.259147	0.167421	0.361588	0.286334	0.255069	0.233189	0.193817	0.200163	0.219734	0.206047	0.252818	0.211476	0.299149	0.203987
421.002	316.788	548.087	399.358	434.166	279.703	340.176	266.095	320.993	330.291	414.835	466.907	436	377.34	307.093	237.676	319.054		1661.96	1838.48	1507.7	1381.43	1690.63	1211.33	1700.73	1301.17	1414.54	1605.04	1614.17	2167.31	1481.23	1773.25	1649.16	1163.02	1393.14		0.253316	0.172309	0.363524	0.289091	0.256808	0.230905	0.200018	0.204505	0.226925	0.205784	0.256996	0.215431	0.294351	0.212796
433.909	312.139	557.49	405.082	417.521	289.456	344.392	262.567	305.096	324.369	414.099	464.104	414.555	374.479	316.321	239.767	332.837		1666.45	1825.58	1509.93	1368.28	1670.4	1189.78	1707.18	1277.35	1398.31	1604.22	1602.68	2146.84	1436.78	1776.93	1638.47	1135.35	1369.34		0.260379	0.170981	0.369215	0.296052	0.249954	0.243285	0.201731	0.205555	0.218189	0.202197	0.25838	0.216179	0.288531	0.210745
427.275	331.261	543.917	418.386	423.397	273.699	354.709	273.465	313.296	334.286	405.712	455.238	411.448	367.879	316.017	237.22	317.384		1684.47	1817.74	1500.53	1360.64	1657.4	1177.91	1691.86	1297.02	1387.75	1594.97	1610.89	2123.85	1441.52	1764.45	1614.13	1130.71	1369.32		0.253655	0.182238	0.362483	0.307491	0.255458	0.23236	0.209656	0.210841	0.225758	0.209588	0.251857	0.214346	0.285427	0.208495
425.219	313.565	539.151	404.498	409.38	263.058	347.875	279.364	316.578	334.73	411.293	457.235	396.707	369.9	315.702	228.238	328.224		1660.34	1814.12	1485.91	1347.26	1650.34	1178.82	1678.76	1289.49	1399.48	1605.83	1602.15	2121.56	1426.76	1772.65	1613.79	1120.41	1349.19		0.256104	0.172847	0.362842	0.300236	0.248059	0.223154	0.207221	0.216646	0.226212	0.208447	0.256714	0.215519	0.278048	0.208671
422.556	322.021	544.391	401.975	409.544	246.763	350.877	281.478	328.632	355.836	420.921	465.026	422.135	388.507	306.942	220.132	343.735		1663.92	1795.02	1467.4	1352.35	1645.79	1181.99	1676.33	1278.11	1390.32	1613.63	1593.99	2096.83	1431.23	1765.47	1599.89	1136.38	1353.39		0.253953	0.179397	0.37099	0.297243	0.248844	0.208769	0.209312	0.22023	0.236372	0.22052	0.264067	0.221776	0.294947	0.220059
423.806	337.802	543.07	413.246	413.749	298.847	347.057	282.471	326.81	354.154	425.791	467.876	413.725	394.16	309.032	245.502	324.287		1667.3	1807.54	1466.45	1349.2	1639.47	1166.87	1679.88	1267.95	1376.84	1625.38	1599.37	2095.22	1424.26	1770.22	1585.82	1139.46	1349.75		0.254186	0.186885	0.370331	0.306289	0.252367	0.256109	0.206596	0.222778	0.237363	0.217891	0.266224	0.223306	0.290484	0.222661
421.096	355.509	535.314	402.909	421.014	285.239	355.796	269.505	310.364	331.342	419.624	469.208	403.073	385.855	311.766	233.085	305.715		1672.26	1802.79	1465.69	1339.81	1649.51	1177.63	1666.03	1264.46	1374.01	1627.64	1621.15	2078.56	1429.99	1782.88	1585.31	1130.78	1355.53		0.251813	0.197199	0.36523	0.300722	0.255236	0.242216	0.213559	0.213139	0.225881	0.203572	0.258844	0.225737	0.28187	0.216423
411.74	351.094	546.755	407.161	414.753	275.965	356.496	253.9	302.959	332.686	433.208	456.546	432.181	376.569	301.942	227.082	342.287		1693.67	1809.69	1450.75	1332.39	1642.56	1174.63	1657.84	1265.44	1378.91	1631.22	1609.25	2080.97	1432.41	1783.71	1580.58	1126.96	1353.09		0.243105	0.194008	0.376878	0.305586	0.252504	0.234937	0.215036	0.200641	0.219708	0.203949	0.269199	0.219391	0.301715	0.211116
419.098	347.205	569.976	375.542	451.442	258.537	353.446	256.855	310.808	337.685	420.979	455.787	391.275	395.363	301.008	234.394	326.752		1696.23	1813.79	1461.89	1323.94	1636.25	1166.09	1666.23	1269.81	1380	1639.28	1619.4	2078.81	1429.78	1780.33	1586.24	1135.04	1347.55		0.247077	0.191425	0.389889	0.283655	0.2759	0.221713	0.212123	0.202279	0.225222	0.205996	0.25996	0.219254	0.273662	0.222074
410.431	370.601	567.859	402.991	428.711	265.712	360.011	251.552	323.213	332.686	431.094	448.381	395.947	389.897	300.611	231.885	341.423		1685.22	1803.12	1433.79	1336.84	1631.48	1162.49	1671.85	1280.64	1373.8	1654.86	1626.15	2077.09	1454.24	1778.55	1590.52	1139.44	1355.32		0.243548	0.205533	0.396055	0.30145	0.262775	0.228571	0.215336	0.196427	0.235269	0.201036	0.265102	0.21587	0.272272	0.219222
412.838	326.693	544.349	382.842	439.13	272.557	346.539	262.848	317.267	326.705	433.804	454.261	395.235	391.38	305.587	244.232	346.013		1690.21	1815.24	1436.96	1344.89	1636.55	1137.77	1675.28	1276.95	1369.39	1650.74	1641.02	2073.85	1460.11	1782.79	1588.73	1143.5	1358.2		0.244252	0.179973	0.378819	0.284663	0.268327	0.239553	0.206854	0.20584	0.231686	0.197914	0.264351	0.219042	0.270688	0.219532
411.272	361.35	539.794	386.194	425.546	278.361	349.587	241.928	312.794	330.98	393.752	467.923	407.844	403.528	314.195	232.916	328.352		1678.26	1811.36	1444.68	1334.8	1629.5	1129.48	1659.76	1269.77	1359.21	1657.7	1642.72	2094.67	1488.95	1777.94	1588.92	1145.7	1349.93		0.245058	0.199491	0.373643	0.289327	0.261151	0.24645	0.210625	0.190529	0.230129	0.199662	0.239695	0.223388	0.273913	0.226965
401.823	409.45	558.424	385.493	424.506	278.115	350.738	256.388	300.167	325.058	432.846	464.629	402.131	408.995	306.428	244.398	345.028		1692.69	1814.28	1423.01	1333.72	1621.78	1118.59	1662.91	1272.22	1366.58	1669.3	1661.09	2115.35	1505.5	1774.02	1599.37	1172.97	1358.14		0.237387	0.225682	0.392425	0.289037	0.261753	0.24863	0.210918	0.201528	0.219649	0.194727	0.26058	0.219646	0.267107	0.230547
430.078	340.301	574.207	363.16	431.889	279.354	356.801	254.671	313.214	324.089	445.38	470.154	409.24	375.471	306.801	238.114	340.231		1706.47	1815.59	1428.32	1320.89	1625.24	1088.44	1665.05	1263.97	1349.38	1658.26	1666.28	2129.59	1535.53	1771.47	1597.27	1163.82	1348.38		0.252028	0.187433	0.402015	0.274937	0.265739	0.256655	0.214289	0.201485	0.232117	0.195439	0.267289	0.220773	0.266514	0.211955
409.252	328.34	549.258	375.88	412.394	278.094	354.861	254.639	319.592	333.34	425.826	455.588	409.03	389.406	297.188	229.593	339.136		1683.85	1822.89	1404.09	1332.75	1624.65	1087.23	1665.83	1272.85	1348.55	1651.62	1681.93	2145.7	1548.82	1775.52	1614.85	1182.5	1355.72		0.243045	0.180121	0.391185	0.282033	0.253835	0.255783	0.213024	0.200054	0.236989	0.201826	0.253177	0.212326	0.264091	0.21932
408.364	350.545	549.22	348.559	405.783	276.81	353.122	261.484	299.046	333.363	393.541	455.425	431.725	390.341	302.363	223.134	334.023		1682.27	1827.44	1396.09	1328.46	1617.58	1086.75	1668.32	1268.18	1360.17	1671.15	1692.64	2177.69	1574.64	1802.56	1603.32	1178.08	1373.03		0.242746	0.191824	0.3934	0.262379	0.250857	0.254714	0.211663	0.206189	0.219859	0.199481	0.232502	0.209132	0.274174	0.216548
402.851	330.256	558.517	354.131	421.224	272.312	359.329	275.976	311.325	345.16	428.758	455.156	409.326	405.733	301.3	228.951	341.592		1687.71	1818.55	1412.14	1324.45	1629.75	1055.04	1690.98	1279.22	1353.98	1686.15	1707.37	2184.35	1611.51	1806.17	1623.77	1181.2	1365.88		0.238696	0.181604	0.395512	0.26738	0.258459	0.258106	0.212497	0.215738	0.229933	0.204704	0.251122	0.208371	0.254001	0.224637
403.376	318.657	550.802	347.158	426.843	272.11	345.943	287.003	322.729	351.713	425.791	474.78	413.624	388.238	330.63	238.905	346.019		1698.78	1835.87	1372.45	1321.04	1613.51	1071.7	1680.62	1284.53	1333.54	1688.99	1700.52	2188.24	1641.62	1789.98	1620.75	1184.9	1371.33		0.23745	0.173573	0.401329	0.262791	0.264542	0.253905	0.205843	0.22343	0.24201	0.208238	0.250389	0.216968	0.251961	0.216895
435.58	340.406	562.233	383.589	388.647	263.712	355.385	262.256	323.045	347.964	399.615	454.175	421.748	398.295	314.043	243.253	342.97		1676.08	1827.39	1386.75	1309.45	1616.94	1063.36	1698.85	1271.99	1339.59	1687.29	1734.94	2207.11	1668.32	1811.37	1622.67	1200.69	1374.17		0.25988	0.18628	0.405432	0.29294	0.24036	0.247998	0.209191	0.206178	0.241152	0.206227	0.230334	0.205778	0.252799	0.219886
433.022	333.573	553.603	401.402	375.787	236.157	369.803	263.525	307.661	344.273	422.275	453.568	436.269	393.658	322.921	226.089	338.216		1681.97	1843.01	1365.58	1302.9	1618.71	1067.9	1691.5	1288.78	1338.62	1692.45	1749.16	2234.39	1710.35	1810.01	1622.93	1201.54	1382.06		0.25745	0.180994	0.405398	0.308083	0.232152	0.221142	0.218624	0.204477	0.229835	0.203416	0.241417	0.202994	0.255075	0.217489
436.315	352.601	549.234	373.754	477.933	260.383	349.812	259.227	324.636	344.097	395.142	455.6	416.949	389.173	317.15	235.519	340.786		1683.33	1819.92	1351.44	1304.66	1613.82	1057.21	1683.03	1280.56	1350.54	1701.96	1755.5	2257.06	1738	1819.12	1643.01	1202.54	1393.21		0.259198	0.193746	0.406408	0.286476	0.296151	0.246292	0.207846	0.202432	0.240375	0.202177	0.225088	0.201856	0.239901	0.213935
439.142	323.855	567.421	375.109	446.583	267.543	346.258	257.334	320.081	358.943	400.059	465.961	409.117	394.546	307.993	235.308	331.185		1667.31	1821.17	1320.2	1293.17	1619.85	1055.98	1695.2	1281.29	1330.95	1708.69	1763.25	2266.56	1772.78	1827.08	1647.1	1199.4	1374.38		0.263384	0.177828	0.429798	0.29007	0.275694	0.253359	0.204258	0.200839	0.240491	0.21007	0.226888	0.20558	0.230777	0.215944
442.378	329.73	575.434	383.963	423.992	280.841	352.835	270.171	318.702	338	390.995	473.425	407.359	383.192	299.56	244.968	320.497		1664.77	1807.21	1324.14	1292.7	1609.87	1062.6	1714.67	1294.55	1333.36	1703.96	1770.56	2276.28	1809.59	1832.5	1644.63	1197.68	1387.95		0.265729	0.182453	0.434572	0.297023	0.263371	0.264297	0.205775	0.208698	0.239022	0.198361	0.220831	0.207981	0.225112	0.209109
437.133	319.522	568.028	409.906	410.139	277.115	0	265.931	316.285	338.07	430.3	487.815	416.399	389.441	314.954	235.027	353.308		1653.78	1797	1302.7	1290.11	1614.49	1057.17	0	1284.78	1345.43	1708.02	1781.47	2288.17	1849.67	1847.22	1638.6	1185.4	1380.64		0.264324	0.177808	0.436038	0.31773	0.254037	0.26213		0.206985	0.235081	0.197931	0.241542	0.21319	0.225121	0.210826
439.983	320.071	540.591	370.928	413.013	279.453	0	274.294	316.658	339.016	411.334	472.7	403.855	368.206	298.391	0	359.535		1664.94	1797.12	1296.27	1274.67	1615.89	1044.91	0	1283.32	1340.93	1718.54	1798.24	2293.55	1890.53	1846.25	1690.69	0	1388.42		0.264263	0.178102	0.417035	0.291	0.255594	0.267441		0.213739	0.236149	0.19727	0.228742	0.2061	0.21362	0.199434
461.534	313.284	615.077	390.119	448.335	285.309	367.283	279.504	318.375	343	415.834	478.015	427.111	367.494	299.536	0	336.035		1648.84	1797.26	1297.21	1272.08	1616.15	1052.16	1733.13	1281.63	1359.15	1712.84	1804.21	2294.16	1921.41	1855.24	1698.68	0	1380.01		0.279915	0.174312	0.474153	0.306679	0.277408	0.271166	0.211919	0.218084	0.234247	0.200252	0.230479	0.208362	0.222291	0.198085
442.109	338.129	643.309	404.778	405.853	272.577	350.113	266.153	329.927	394.125	434.244	465.972	447.739	389.822	0	0	341.046		1656.07	1809.63	1289.1	1255.57	1609.34	1052.93	1729.14	1286.57	1364.98	1723.51	1822.62	2373.28	1956.65	1853.88	0	0	1395.4		0.266964	0.18685	0.499039	0.322385	0.252185	0.258875	0.202478	0.206871	0.241709	0.228676	0.238253	0.196341	0.22883	0.210273
430.72	331.389	652.934	390.644	414.181	249.17	361.284	260.745	328.911	369.736	432.803	448.93	451.921	382.239	0	0	354.943		1645.75	1816.45	1283.45	1256.71	1596.13	1049.32	1737.43	1282.54	1373.36	1729.25	1826.21	2380.35	1992.91	1864.03	0	0	1399.25		0.261717	0.182438	0.508733	0.310847	0.25949	0.237457	0.207942	0.203304	0.239493	0.213813	0.236995	0.188599	0.226764	0.205061
452.528	273.138	573.647	392.782	404.942	234.429	346.913	290.601	333.852	371.017	441.259	478.027	472.899	379.358	0	0	345.333		1632.68	1812.83	1295.04	1242.82	1590.6	1050.77	1727.55	1256.59	1380.02	1734.94	1834.28	2380.81	1996.26	1888.18	0	0	1405.72		0.277169	0.150669	0.442957	0.316042	0.254584	0.223102	0.200812	0.231261	0.241918	0.21385	0.240563	0.200783	0.236892	0.200912
463.788	280.322	596.681	385.657	402.477	235.982	355.813	283.052	343.851	378.742	425.406	457.878	474.067	389.161	0	0	337.962		1623.1	1806.16	1289.35	1260.1	1591.05	1054.94	1745.7	1277.52	1388.78	1734.63	1827.93	2383.07	2032.49	1884.17	0	0	1410.13		0.285742	0.155203	0.462777	0.306053	0.252963	0.223693	0.203822	0.221563	0.247592	0.218341	0.232725	0.192137	0.233244	0.206542
462.597	314.803	582.512	386.802	397.186	246.109	391.602	290.998	327.066	378.422	429.923	450.472	489.485	363.289	0	0	340.217		1639.18	1817.82	1277.59	1242.47	1571.01	1060.82	1743.39	1297.47	1387.42	1749.57	1855.81	2405.57	2078.79	1887.41	0	0	1386.85		0.282213	0.173176	0.455947	0.311317	0.252822	0.232	0.224621	0.224281	0.235737	0.216295	0.231663	0.187262	0.235467	0.19248
480.351	371.383	525.546	389.547	412.043	278.203	388.881	280.111	331.528	379.053	477.705	478.546	487.266	385.447	0	0	332.356		1650.76	1831.2	1300.12	1259.15	1569.96	1076.52	1766.15	1289.62	1386.16	1737.53	1867.84	2402.21	2082.91	1889.03	0	0	1377.76		0.290988	0.202808	0.404229	0.309372	0.262455	0.258428	0.220185	0.217205	0.239169	0.218157	0.255753	0.199211	0.233935	0.204044
497.65	352.122	526.2	403.552	398.938	282.98	378.964	262.52	323.456	376.174	427.14	472.443	0	373.824	0	0	328.723		1626.11	1838.38	1311.78	1258.06	1570.76	1082.91	1776.58	1283.57	1400.85	1746.83	1865.13	2399.56	0	1891.74	0	0	1393.75		0.306037	0.19154	0.401133	0.320772	0.253977	0.261314	0.213311	0.204524	0.230901	0.215347	0.229014	0.196888		0.197609
514.634	329.987	550.823	387.631	389.313	282.068	395.492	270.825	332.871	380.669	416.908	468.589	0	377.796	0	0	336.35		1642.61	1846.58	1304.14	1248.54	1565.23	1083.61	1780.15	1284.77	1409.7	1749.59	1877.33	2388.65	0	1886.92	0	0	1402.17		0.313302	0.178702	0.422366	0.310468	0.248726	0.260304	0.222167	0.210796	0.236128	0.217576	0.222075	0.196173		0.200218
0	341.773	588.644	399.977	406.32	253.001	388.694	267.473	334.424	383.757	428.694	473.798	0	0	0	0	331.655		0	1863.64	1296.3	1237.29	1554.61	1087.37	1754.36	1277.84	1407.41	1749.4	1891.11	2396.35	0	0	0	0	1393.87			0.183391	0.454096	0.323268	0.261365	0.232672	0.221559	0.209317	0.237617	0.219365	0.226689	0.197717
0	411.109	575.539	423.338	416.634	251.915	380.938	276.07	331.282	393.763	415.775	0	0	0	0	0	343.218		0	1870.19	1294.32	1243.33	1543.85	1097.28	1782.16	1277.97	1408.03	1738.36	1892.89	0	0	0	0	0	1399.08			0.219822	0.444666	0.340488	0.269867	0.22958	0.213751	0.216023	0.235281	0.226514	0.219651
0	359.352	581.391	407.827	420.278	256.633	387.168	286.396	342.391	372.89	397.075	0	0	0	0	0	0		0	1876.47	1307.46	1231.05	1523.87	1105.75	1765.43	1279.12	1419.93	1743.77	1888.83	0	0	0	0	0	0			0.191504	0.444673	0.331283	0.275797	0.23209	0.219305	0.2239	0.241132	0.213841	0.210223
0	409.695	578.365	393.506	409.894	249.905	394.985	296.231	330.184	394.397	401.992	0	0	0	0	0	0		0	1901.5	1302.45	1255.72	1525.75	1119.35	1770.37	1283.04	1424.7	1739.2	1905.41	0	0	0	0	0	0			0.215459	0.444061	0.313371	0.268651	0.22326	0.223109	0.230881	0.231756	0.226769	0.210974
0	377.048	597.568	390.142	409.684	276.339	0	290.122	329.624	396.946	399.282	0	0	0	0	0	0		0	1902.07	1289.04	1229.43	1527.97	1083.78	0	1278.94	1429.85	1760.27	1899.45	0	0	0	0	0	0			0.198231	0.463575	0.317336	0.268123	0.254976		0.226846	0.23053	0.225503	0.21021
0	415.793	615.638	391.556	407.885	275.089	0	273.979	329.18	399.494	414.549	0	0	0	0	0	0		0	1912.54	1261.17	1222.14	1522.35	1118.48	0	1291.69	1434.33	1744.24	1902.33	0	0	0	0	0	0			0.217404	0.48815	0.320386	0.267932	0.245948		0.212108	0.229501	0.229036	0.217916
0	0	591.316	422.859	0	0	0	287.844	327.953	0	404.784	0	0	0	0	0	0		0	0	0	1245.01	1519.44	0	0	1281.57	1445	0	1898.74	0	0	0	0	0	0					0.339644				0.224602	0.226957		0.213186
0	0	634.768	435.042	0	0	0	281.385	314.906	0	438.365	0	0	0	0	0	0		0	0	0	1243.42	1546.93	0	0	1302.27	1455.33	0	1900.82	0	0	0	0	0	0					0.349876				0.216072	0.216381		0.230619
0	0	656.447	428.653	0	0	0	303.496	319.964	0	421.662	0	0	0	0	0	0		0	0	0	1269.22	1532.45	0	0	1312.54	1462.06	0	1903.12	0	0	0	0	0	0					0.33773				0.231228	0.218845		0.221564
0	0	649.988	411.401	0	0	0	267.835	327.907	0	419.653	0	0	0	0	0	0		0	0	0	1276.44	1540.28	0	0	1322.02	1451.4	0	1897.62	0	0	0	0	0	0					0.322304				0.202595	0.225925		0.221147
0	0	647.161	409.894	0	0	0	278.616	317.126	0	437.629	0	0	0	0	0	0		0	0	0	1295.89	1542.16	0	0	1317.15	1470.95	0	1905.11	0	0	0	0	0	0					0.316302				0.21153	0.215592		0.229713
0	0	643.575	408.399	0	0	0	241.495	318.866	0	433.401	0	0	0	0	0	0		0	0	0	1291.78	1546.38	0	0	1310.47	1464.75	0	1905.67	0	0	0	0	0	0					0.316152				0.184281	0.217693		0.227427
0	0	658.234	413.55	0	0	0	267.59	310.316	0	390.113	0	0	0	0	0	0		0	0	0	1303.14	1538.26	0	0	1339.64	1489.58	0	1903.16	0	0	0	0	0	0					0.317349				0.199748	0.208324		0.204981
0	0	657.989	415.875	0	0	0	266.912	336.282	0	414	0	0	0	0	0	0		0	0	0	1300.37	1543.11	0	0	1346.35	1463.56	0	1894.84	0	0	0	0	0	0					0.319813				0.198249	0.22977		0.218488
0	0	665.733	423.14	0	0	0	266.282	328.537	0	420.377	0	0	0	0	0	0		0	0	0	1312.34	1536.71	0	0	1348.95	1478.59	0	1905.71	0	0	0	0	0	0					0.322431				0.197399	0.222197		0.220589
0	0	648.691	417.416	0	0	0	257.404	329.145	0	412.68	0	0	0	0	0	0		0	0	0	1316.45	1543.37	0	0	1370.16	1471.97	0	1886.97	0	0	0	0	0	0					0.317078				0.187865	0.223608		0.2187
0	0	737.183	421.364	0	0	0	249.835	330.687	0	424.734	0	0	0	0	0	0		0	0	0	1309.96	1546.47	0	0	1364.99	1489.56	0	1880.81	0	0	0	0	0	0					0.321662				0.183032	0.222002		0.225825
0	0	650.841	409.52	0	0	0	258.444	323.328	0	435.574	0	0	0	0	0	0		0	0	0	1285.03	1543.44	0	0	1366.16	1484.38	0	1881.96	0	0	0	0	0	0					0.318685				0.189175	0.21782		0.231446
0	0	664.413	413.445	0	0	0	256.937	0	0	437.805	0	0	0	0	0	0		0	0	0	1277.19	1544.25	0	0	1386.97	0	0	1899.45	0	0	0	0	0	0					0.323715				0.18525			0.23049
0	0	662.031	417.078	0	0	0	249.742	0	0	435.842	0	0	0	0	0	0		0	0	0	1269.32	1527.29	0	0	1387.06	0	0	1887.26	0	0	0	0	0	0					0.328582				0.180052			0.23094
0	0	726.776	405.245	0	0	0	264.226	0	0	429.009	0	0	0	0	0	0		0	0	0	1304.26	1513.71	0	0	1389.5	0	0	1894.34	0	0	0	0	0	0					0.31071				0.190159			0.226469
0	0	694.059	394.534	0	0	0	247.009	0	0	420.412	0	0	0	0	0	0		0	0	0	1300.47	1512.88	0	0	1405.02	0	0	1889.98	0	0	0	0	0	0					0.303378				0.175804			0.222442
0	0	716.777	396.765	0	0	0	269.599	0	0	416.756	0	0	0	0	0	0		0	0	0	1308.3	1516.16	0	0	1407.01	0	0	1856.79	0	0	0	0	0	0					0.303267				0.191611			0.22445
0	0	715.469	390.212	0	0	0	269.739	0	0	406.314	0	0	0	0	0	0		0	0	0	1321.31	1516.43	0	0	1402.91	0	0	1870.81	0	0	0	0	0	0					0.295323				0.192272			0.217186
[truncated: 24 more columns]

## Sheet: average
t (min)	v (%)	v_st (%)	m (%)	m_st (%)	d (%)	d_st (%)
0	100	9.11895e-15	100	3.44664e-15	100	4.87428e-15
1	99.3877	1.0677	100.347	2.90187	100.982	3.28816
2	98.6826	1.28261	100.561	4.28892	101.923	4.61461
3	98.3054	1.04476	101.047	4.22483	102.799	4.40081
4	97.3805	1.58151	100.928	3.09957	103.668	3.53234
5	97.0447	1.61587	101.042	4.27862	104.145	4.65687
6	96.6212	1.60036	99.9759	4.23945	103.472	4.04752
7	96.4029	1.60084	101.34	6.66756	105.111	6.57038
8	96.2532	1.924	103.225	5.24628	107.265	5.43128
9	96.309	2.06113	101.303	6.02942	105.221	6.4541
10	96.2192	2.2588	101.184	6.42588	105.181	6.53973
11	96.3151	2.4158	100.798	6.62384	104.64	6.1513
12	96.4306	2.44001	101.718	7.69052	105.492	7.65598
13	96.5027	2.69843	101.044	5.35452	104.72	5.0287
14	96.4059	2.77157	100.78	7.56796	104.561	7.57533
15	96.7732	3.26506	102.73	10.6548	106.184	10.6682
16	96.5936	3.77286	101.581	6.12247	105.221	6.00146
17	96.8493	3.91685	100.271	5.54544	103.607	5.5285
18	97.2114	4.32273	99.6682	7.74398	102.583	7.34145
19	97.5777	4.99143	101.022	6.64081	103.642	6.45557
20	97.5214	5.3084	101.946	6.96043	104.664	6.81387
21	97.8653	5.78208	101.693	6.98232	104.044	6.41444
22	98.2366	6.30725	100.942	7.75401	102.806	5.71745
23	98.4158	6.83781	102.2	7.74882	104.151	8.66992
24	98.3317	7.48648	101.476	5.91872	103.592	7.46217
25	98.6599	7.82936	101.439	5.10539	103.35	8.34974
26	98.5946	8.73261	102.796	4.59157	104.823	7.36116
27	98.8456	9.83503	100.996	6.32147	102.909	9.38818
28	99.17	9.8331	103.419	4.59376	105.147	9.93164
29	99.5066	10.8651	105.359	7.91402	106.721	10.7698
30	99.7267	11.4452	104.001	8.41716	105.128	10.9458
31	99.691	11.6374	102.912	9.4203	103.753	8.03195
32	100.07	11.9422	103.255	9.62721	103.796	9.08271
33	100.424	12.8031	104.342	9.74794	104.619	9.01083
34	100.787	12.5823	107.439	10.5	107.224	9.00559
