# Supplementary material for: A mechano-osmotic feedback couples cell volume to the rate of cell deformation
Source: eLife journal article supplement (doi:10.7554/elife.72381), 2022-04-13
Supplement: supp [file M_V_D_exp2.xlsx]

## Sheet: V
2	3	3	4	4	5	5	5	5	6	6	6	6	7	7	7	7	8	8	9	9	9	9	10	11	11	11	11	12	12	12	12	13	13	14	14	14	14	14	5	5	5	5	5	5	5	5	5	5	5
1	1	2	1	2	1	2	3	4	1	2	3	4	1	2	3	4	1	2	1	2	3	4	1	1	2	3	4	1	2	3	4	1	2	1	2	3	4	5	1	2	3	4	5	6	7	8	9	10	11
1769.79	1671.1	1767.37	1357.94	1245.1	1809.84	1689.48	2032.49	1904.87	2092.92	1876.01	2036.57	1736.26	2034.59	1660.78	1815.09	1904.53	1573.02	2097.91	1281.67	2030.26	1446.61	1510.36	1399.85	992.404	1660.61	1870.41	2054.56	1618.41	1796.92	1643.16	1469.36	1495.73	1665.39	1496.57	2215.95	1772.97	1355.11	2060.57	1584.46	2472.24	1983.79	2571.31	1899.25	2006.54	1751.02	1984.98	1782.78	1799.84	2127.5
1779.93	1678.7	1759.61	1358.4	1256.48	1785.46	1650.15	2025.81	1902.89	2072.8	1871.41	2035.55	1730.13	2057.43	1650.86	1813.12	1891.55	1589.27	2100.9	1259.39	2009.17	1417.46	1511.32	1411.14	986.785	1640.68	1864.47	2082.42	1636.57	1790.37	1673.26	1471.68	1513.4	1672.12	1506.43	2209.86	1800.3	1349.47	2061.3	1563.56	2460.08	1953.24	2565.47	1888.88	1999.93	1752.26	1972.08	1801.22	1802.5	2127.58
1763.35	1652.23	1761.7	1345.86	1223.22	1774.7	1654.36	2033.4	1886.24	2062.33	1881.26	2029.68	1732.25	2041.61	1624.83	1808.24	1877.57	1602.39	2117.03	1253.46	2007.54	1428.8	1545.5	1427.05	973.001	1640.75	1842.58	2104.41	1660.42	1798.82	1662.48	1463.67	1532.6	1695.76	1523.05	2210.39	1803.27	1342.62	2067.14	1609.76	2436.41	1958.75	2552.32	1934.31	1996.6	1737.5	1955.36	1796.9	1789.81	2142.97
1747.13	1662.29	1740.41	1355.61	1243.38	1783.13	1617.58	2013.39	1920.79	2043.7	1885.41	2013.88	1736.76	2029.75	1648.17	1825.15	1882.68	1622.51	2094.63	1241.15	2018.28	1431.17	1524.02	1416.23	984.999	1645.18	1837.23	2070.93	1705.21	1822.73	1711.89	1491.62	1515.63	1709.32	1512.4	2187.13	1804.79	1343.46	2036.44	1613.22	2434.81	1932.62	2547.93	1942.92	1978.64	1747.66	1953.77	1782.95	1796.89	2140.99
1741.5	1666.82	1732.44	1339.44	1226.81	1755.36	1620.7	1994.58	1905.06	2059.05	1876.02	2016.21	1738.22	2032.65	1627.69	1799.06	1893.02	1646.81	2080.51	1242.25	2009.23	1419.35	1522.43	1442.33	964.136	1637.23	1840.45	2108.42	1714.58	1829.98	1703.07	1482.11	1524.26	1736.9	1494.11	2192.56	1810.92	1360.44	2047.73	1625.23	2433.25	1953.59	2546.34	1968.62	1955.56	1760.4	1927.52	1776.11	1784.87	2136.75
1745.98	1640.69	1701.64	1325.79	1243.32	1751.05	1620.56	2022.74	1915.03	2050.02	1901.84	2002.91	1723.67	1975.09	1653.72	1790.46	1897.53	1654.34	2059.9	1215.2	2006.05	1397.85	1496.8	1419.21	963.83	1651.19	1811.3	2107.45	1729.32	1845.58	1714.71	1485.71	1563.35	1720.11	1499.03	2175.74	1793.63	1333.13	2062.74	1641.11	2399.78	1901.51	2545.97	1957.78	1948.31	1761.24	1947.44	1746.78	1775.64	2132.98
1735.93	1642.95	1696.4	1302.01	1226.17	1746.24	1604.22	1990.53	1935.22	2070.83	1902.91	1968.27	1696.27	1974.84	1613.21	1797.3	1864.61	1657.97	2060.82	1206.42	2028.06	1404.58	1471.41	1424.61	944.675	1641.89	1793.69	2107.63	1734.02	1851.31	1706.9	1484.52	1559.12	1711.48	1473.32	2180.05	1806.72	1292.13	2032.42	1645.71	2391.03	1922.34	2515.43	1982.18	1883.2	1774.5	1935.05	1749.86	1776.37	2114.68
1753.17	1636.03	1688.24	1268.63	1229.72	1732.99	1572.08	1947.74	1948.92	2041.94	1913.3	1957.6	1692.84	1980.57	1635.7	1776.01	1864.01	1682.27	2078	1204.62	2009.54	1389.26	1484.92	1416.25	935.442	1656.7	1771.49	2103.49	1746.98	1864.62	1694.24	1488.65	1548.57	1706.86	1442.35	2174.11	1791.89	1301.08	1999.25	1650.21	2361.54	1909.06	2524.48	1988.73	1854.55	1779.7	1893.56	1715.78	1766.79	2104.87
1722.79	1640.38	1674.61	1270.99	1214.58	1694.74	1578.25	1892.9	1964.85	2034.67	1908.49	1942.7	1675.84	1974.46	1590.6	1784.82	1841.61	1691.92	2064.54	1210.8	2017.38	1370.3	1482.42	1401.71	929.675	1640.14	1772.04	2131.58	1755.71	1848.32	1687.82	1487.59	1519.46	1715.48	1442.76	2145.85	1793.98	1295.29	2021.79	1667.12	2353.69	1892.22	2475.43	1977.89	1844.99	1760.24	1859.85	1694.49	1737.41	2080.42
1723	1612.21	1667.69	1269.44	1251.83	1697.25	1571.92	1851.36	1999.97	2030.84	1908.22	1950.94	1666.41	1958.68	1609.64	1752.93	1829.06	1710.6	2060.07	1202.99	2009.91	1359.71	1430.21	1393.71	912.614	1638.61	1755.77	2114.6	1763.38	1857.33	1693.43	1497.67	1540.81	1703.25	1412.69	2160.06	1792.67	1287.52	1987.08	1683.97	2337.83	1849.25	2486.57	1971.94	1802.38	1780.55	1891.68	1709.23	1736.67	2022.39
1706.99	1613.54	1656.31	1252.42	1206.05	1718	1529.24	1857.85	1998.48	2021.22	1903.3	1938.21	1652	1952.37	1609.78	1742.1	1798.8	1712.25	2045.39	1213.98	2001.33	1358.89	1463.62	1396.99	894.978	1635.02	1719.31	2087.13	1756.21	1831.76	1673.32	1464.44	1529.21	1690.11	1420.45	2129.56	1769.29	1273.01	1964.34	1673.63	2335.1	1870.44	2473.74	1981.38	1792.25	1779.66	1841.57	1703.47	1748.5	2047.72
1729.25	1594.37	1661.83	1249.74	1209.92	1686.09	1548.32	1830.82	1994.58	2010.84	1892.34	1930.4	1683.32	1908.59	1594.52	1747.35	1814.89	1734.65	2024.38	1179.48	2000.01	1344.73	1462.82	1403.91	904.559	1638.78	1722.57	2094.85	1753.13	1816.11	1683.31	1484.26	1529.5	1687.54	1436.92	2133.71	1764.31	1256.17	1949.21	1675.22	2311.67	1851.22	2465.51	1966.92	1790.59	1789.3	1816.13	1697.71	1726.49	2014.61
1683.74	1586.83	1660.07	1253.64	1195.15	1696.88	1540.79	1825.99	2020.83	2018.84	1873.3	1909.07	1655.05	1925.57	1590.36	1708.58	1803.37	1739.44	2014.51	1200.13	1989.07	1337.78	1432.34	1426.09	884.021	1604.46	1722.59	2100.3	1752.48	1795.25	1688.98	1473.54	1559.38	1684.09	1435.61	2093.71	1773.55	1257.26	1944.09	1702.41	2314.26	1839.63	2476.59	1968.72	1768.41	1809.48	1803.97	1680.77	1732.23	2017.14
1732.82	1608.09	1643.19	1254.58	1229.04	1667.07	1524.87	1805.5	2011.37	2008.14	1904.75	1895.3	1661.51	1916.74	1585.85	1713.13	1792.26	1760.81	2026.69	1201.23	1958.69	1333.03	1421.53	1386.38	889.693	1632.46	1712.97	2085.26	1725.88	1802.5	1678.75	1466.18	1537.38	1671.3	1431.88	2098.43	1778.77	1255.73	1955.2	1702.92	2290.75	1844.73	2461.82	1945.63	1755.55	1805.53	1807.16	1712.14	1712.12	1965.95
1699.81	1602.76	1623.32	1232.04	1225.29	1660.24	1524.34	1826.56	2010.45	2026.59	1918.25	1906.15	1652.05	1907.81	1612.92	1728.67	1791.43	1753.69	1999.65	1203.51	1969.76	1368.96	1416.39	1402.13	891.327	1611.64	1733.86	2086.68	1757.21	1810.68	1690.5	1458.85	1508.64	1673.7	1434.82	2074.53	1742.74	1268.32	1943.84	1707.28	2296.75	1854.36	2469.76	1973.75	1777.28	1794.36	1797.74	1707.8	1727.49	1977.55
1706.75	1593.14	1640.91	1227.83	1237.17	1661.09	1514.72	1818.49	1987.21	2003.53	1888.49	1915.56	1652.22	1901.31	1618.27	1692.06	1803.51	1764.22	1974.07	1200.18	1957.16	1344.32	1424.34	1396.8	912.167	1632.14	1756.83	2059.46	1756.21	1798.37	1702.12	1469.06	1536.91	1684.25	1421.79	2089.31	1746.85	1248.91	1941.45	1716.68	2299.53	1842.55	2467.76	1967.03	1751.93	1796.76	1794.53	1705.91	1700.02	1972.1
1716.06	1597.45	1618.53	1242.93	1202.77	1664.43	1519.15	1837.8	1996.33	1995.29	1903.98	1886.73	1631.81	1915.19	1589.76	1691.04	1789.14	1780.12	1990.4	1187.13	1977.1	1371.93	1434.89	1382.33	901.932	1615.91	1748.34	2047.56	1765.99	1817.34	1718.54	1491.63	1547.93	1670.2	1436.78	2087.54	1759.19	1236.93	1943.5	1709.65	2295.2	1842.45	2456.2	1975.02	1746.34	1805.04	1829.37	1720.29	1721.82	1974.04
1741.39	1580.51	1629.7	1243.36	1233.92	1661.44	1535.27	1833.57	1993.62	2016.32	1889.52	1857.91	1636.82	1868.2	1589.07	1663.07	1764.72	1794.36	2007.63	1239.28	1941.82	1377.53	1450.28	1372.68	904.554	1623.18	1753.22	2052.84	1781.5	1803.29	1728.03	1493.16	1557.55	1649.75	1432.94	2079.32	1746.04	1246.57	1925.53	1699.61	2299.96	1837.71	2460.34	1985.12	1752.23	1800.97	1810.45	1728.44	1697.46	1999.47
1741.13	1589.23	1626.13	1236.63	1251.81	1649.32	1536.31	1821.48	2015.2	1994.21	1863.13	1890.44	1615.32	1913.35	1583.33	1702.55	1774.93	1792.83	1995.29	1225.21	1952.13	1366.75	1420.86	1407.28	912.668	1610.81	1766.38	2036.69	1781.89	1812.41	1719.67	1479.81	1573.67	1656.74	1439.04	2077.35	1758.38	1258.21	1933.88	1723.34	2301.47	1871.46	2465.41	1967.58	1730.73	1799.44	1827.57	1734.12	1669.6	1933.13
1777.72	1593.94	1630.3	1262.51	1250.04	1663.59	1528.5	1831.99	2005.57	1997.36	1835.14	1915.56	1618.77	1902.3	1579.1	1717.69	1876.95	1823.12	1986.94	1215.87	1957.19	1376.61	1439.08	1393.85	927.74	1627.28	1760.48	2065.27	1783.05	1809.38	1746.7	1485.49	1538.57	1676.06	1434.6	2072.77	1757.61	1244.95	1935.08	1723.38	2325.08	1872.16	2465.08	1975.25	1752.58	1776.66	1841.91	1750.29	1717.19	1991.69
1758.75	1601.43	1609.92	1257.09	1247.18	1670.95	1524.15	1866.72	1994.53	2014.87	1799.95	1918.63	1618.47	1913.22	1570.65	1726.59	1795.99	1804.41	1984.74	1242.68	1950.18	1403.78	1436.32	1375.36	914.093	1634.67	1745.38	2059.55	1771.24	1819.9	1765.07	1501.68	1569.92	1672.04	1442.08	2069.21	1748.09	1267.69	1958.69	1724.6	2322.49	1886.4	2473.71	1946.02	1762.51	1826.44	1865.28	1723.12	1709.72	1966.74
1797.32	1579.33	1601.77	1251.92	1258.03	1842.89	1512.59	1853.23	1993.34	2013.69	1801.72	1889.2	1638.16	1898	1568.27	1755.98	1798.67	1837.95	1970.05	1240.7	1951.13	1379.72	1452.47	1383.6	897.363	1610.06	1738	2044.77	1794.6	1810.47	1770.7	1474.9	1571.27	1697.92	1452.72	2054.15	1776.09	1264.86	1960.05	1726.24	2328	1893.38	2499.59	1915.74	1759.85	1811.82	1865.54	1717.32	1714.39	1980.31
1797.51	1574.1	1609.28	1252.59	1284.1	1660.88	1536.08	1867.71	2010.76	2006.07	1766.18	1913.99	1649.41	1898.58	1564.33	1742.26	1775.56	1823.08	1983.15	1244.44	1932.57	1366.68	1476.74	1373.25	901.203	1639.5	1755.37	2024.07	1806.02	1793.36	1771.06	1495.51	1576.25	1673.46	1447.01	2057.11	1756.87	1264.38	1950.8	1708.9	2360.11	1946.51	2534.8	1927.88	1755.9	1821.73	1854.9	1748.4	1722.74	1966.12
1810.41	1576.38	1628.62	1244.82	1270.84	1690.69	1529.83	1868.47	1997.04	1999.4	1776.78	1893.76	1645.8	1909.49	1572.17	1769.84	1780.64	1826.66	1976.91	1276.73	1942.55	1407.31	1454.62	1388.63	900.538	1629.99	1738.5	2042.95	1797.05	1807.3	1774.3	1487.6	1591.42	1683.55	1458.25	2055.57	1752.42	1272.62	1961.57	1735.86	2382.64	1938.58	2548.51	1897.09	1763.33	1824.58	1860.71	1737.26	1741.11	1994.63
1828.89	1593.38	1610.34	1257.11	1273	1686.06	1526.94	1887.9	1991.89	2034.75	1757.86	1917.58	1641.84	1934.57	1556.27	1768.65	1753.67	1865.9	1979.2	1274.7	1921.67	1389.86	1455.38	1401.37	907.236	1635.51	1723.99	2018.82	1837.53	1805.01	1788.68	1490.52	1615.57	1672.96	1486.03	2051.39	1751.5	1303.82	1946.68	1724.66	2378.69	1958.12	2534.12	1887.27	1760.19	1852.38	1874.33	1752.06	1720.82	1998.75
1821.63	1587.48	1614.67	1247.85	1289.41	1663.03	1555.09	1876.72	1984.93	2009.91	1757.13	1931.4	1657.47	1911.76	1585.68	1810.2	1783.97	1840.77	1962.66	1283.96	1926.15	1403.42	1447.62	1408.44	926.315	1629.63	1726.49	1985.83	1830.04	1822.56	1784.98	1483.51	1599.15	1674.53	1461.48	2044.55	1710.49	1247.18	1958.64	1717.72	2398.73	1977.2	2522.08	1881	1784.04	1822.71	1897.93	1768.11	1727.44	1994.67
1839.08	1571.45	1633.16	1248.57	1279.07	1693.31	1538.84	1853.08	1941.37	2028.08	1750.98	1939.99	1661.1	1960.65	1616.98	1813.85	1747.05	1853.46	1952.09	1290.47	1931.01	1414.23	1423.28	1412.69	929.97	1636.29	1745.95	2003.25	1859.36	1818.36	1780.22	1478.1	1613.64	1702.65	1456.85	2048.16	1713.74	1251.64	1963.67	1711.14	2397.42	1977.06	2556.24	1854.22	1790.02	1833.99	1886.94	1782.94	1740.49	2008.53
1843.4	1573.17	1625.17	1263.09	1280.86	1725.17	1550.97	1878.52	1890.58	2038.14	1743.84	1949.75	1682.05	1937.78	1597.21	1834.62	1765.74	1874.67	1948.88	1303.23	1949.76	1414.81	1465.24	1380.77	920.557	1625.28	1725.43	2025.64	1849.77	1824.03	1765.3	1508.21	1596.91	1693.75	1490.08	2029.59	1758.63	1276.8	1982.16	1723.11	2403.03	1995.5	2567.66	1855.28	1779.11	1824.33	1886.34	1776.72	1742.07	2007.29
1856.29	1593.2	1640.6	1246.62	1303.59	1724.35	1561.39	1857.9	1859.17	2030	1756.56	1957.29	1676.08	1928.77	1606.06	1822.43	1764.03	1868.17	1971.76	1307.6	1931.63	1430.12	1465.67	1394.46	944.595	1641.95	1729.77	2031.57	1868.13	1830.64	1789.87	1508.74	1607.03	1693.34	1479.66	2028.8	1725.14	1284.4	1972.27	1721.66	2431.65	2019.68	2556.01	1850.14	1792.79	1839.97	1897.52	1769.56	1729.1	1984.69
1844.06	1591.81	1636.72	1243.66	1288.06	1714.37	1570.24	1858.62	1867.76	2046.96	1750.92	1955.82	1659.46	1952.77	1609.13	1830.19	1777.03	1906.85	1962.42	1314.89	1948.21	1427.4	1455.59	1419.1	923.421	1618.61	1747.17	2028.66	1862.4	1836.51	1795.03	1519.75	1614.71	1690.29	1479.49	2034.9	1771.9	1272.19	1984.05	1712.47	2451.12	2031.79	2564.57	1876.07	1770.29	1861.72	1903.6	1756.61	1735.54	1990.76
1858.25	1590.29	1623.82	1259.31	1274.29	1727.58	1558.73	1859.6	1871.99	2059.59	1726.29	1970.05	1658.15	1967.77	1648.98	1829.5	1764.09	1904.26	1950.7	1318.04	1957.15	1435.78	1474.04	1411.97	936.778	1612.9	1742.2	2058.38	1862.44	1812.03	1792.21	1526.93	1635.41	1719.07	1462.22	2028.11	1773.77	1274.36	1976.15	1704.83	2424.66	2048.49	2591.82	1890.59	1801.08	1837.03	1934.45	1822.27	1732.81	1995.88
1863.77	1548.24	1633.75	1256.55	1266.35	1725.61	1543.84	1851.14	1851.31	2040.21	1761.24	1966.44	1653.06	1957.66	1615.8	1816.78	1795.03	1887.01	1946.58	1305.05	1943.23	1459.28	1450.06	1416.52	935.793	1608.73	1730.48	2051.89	1877.45	1814.46	1780.05	1505.49	1625.34	1679.35	1462.97	2020.39	1732.9	1278	1959.13	1691.59	2433.98	2022.95	2611.6	1912.98	1769.3	1829.21	1938.8	1757.33	1738.31	2014.1
1869.96	1575.8	1644.22	1239.55	1272.2	1737.09	1566.46	1884.94	1890.97	2070.52	1762.5	1953.52	1671.33	1973.4	1622.65	1860.16	1770.3	1880.65	1961.52	1375.36	1958.3	1438.91	1458.68	1424.5	934.992	1618.81	1716.51	2056.76	1872.85	1829.22	1768.78	1506.41	1606.59	1694.93	1483.85	1983.24	1753.3	1269.51	2008.77	1712.55	2429.91	2036.58	2617.86	1930.78	1794	1848.25	1926.2	1784.76	1723.07	1988.28
1860.31	1579.94	1657.06	1241	1259.53	1761.73	1566.48	1960.71	1866.82	2055.75	1770.23	1985.07	1669.53	1990.47	1644.54	1858.96	1785.8	1899.53	1932.14	1343.56	1926.19	1414.64	1487.03	1424.36	928.034	1616.26	1710.97	2099.38	1860.55	1847.55	1782.11	1508.95	1607.23	1699.16	1493.58	2003.11	1767.07	1270.13	1974.88	1707.57	2444.87	2036.21	2613.07	1971.62	1788	1833.84	1913.13	1793.46	1721.3	2010.7
1845.08	1590.9	1627.63	1239.71	1280.3	1751.76	1567.61	1965.4	1885.05	2072.71	1760.24	2002.22	1665.39	1979.43	1664.31	1872.02	1782.03	1900.33	1941.03	1335.14	1936.34	1427.07	1498.15	1388.14	937.096	1598.56	1713.76	2095.65	1858.43	1838.16	1757.54	1521.11	1617.78	1694.92	1477.27	1997.15	1757.45	1264.14	1985.9	1695.38	2428.31	2030.38	2617.83	1967.98	1778.81	1835.36	1928.4	1776.97	1732.09	2017.46
1856.61	1584.59	1644.85	1245.74	1275.77	1732.19	1572.31	1857.99	1903.47	2066.18	1769.12	1984.55	1653.31	2000.17	1646.76	1883.96	1791.45	1888.03	1944.26	1343.87	1935.18	1436.43	1478.28	1386.09	947.752	1606.51	1713.81	2073.64	1898.39	1850.93	1765.01	1520.01	1624.45	1705.5	1506.31	1983.16	1748.36	1282.37	1977.67	1732.69	2415.46	2047.41	2596.25	1989.68	1809.68	1822.65	1924.92	1809.13	1771.14	2007.03
1837.19	1585.82	1644.39	1245.53	1278.34	1765.17	1577.68	1844.75	1882.65	2095.83	1770.13	2000.34	1659.13	1989.9	1649.4	1917.45	1781.41	1862.85	1936.39	1349.89	1950.76	1412.4	1485.87	1413.37	940.331	1625.32	1707.79	2096.38	1890.79	1832.81	1745.22	1520.73	1630.34	1691.6	1488.23	1956.54	1770.87	1272.75	1992.98	1726.83	2405.84	2041.7	2577.42	2016.94	1815.92	1826.02	1901.14	1800.26	1728.7	2032.82
1835.53	1584.96	1640.57	1260.85	1294.02	1780.31	1592.67	1839.31	1895.36	2064.37	1799.69	1979.26	1656.16	2006.92	1651.16	1854.86	1794.32	1861.84	1917.76	1341.19	1960.22	1461.53	1505.19	1399.3	937.638	1618.63	1748.94	2139.26	1900.89	1842.43	1753.78	1529.51	1624.95	1697.53	1462.98	1962.49	1770.97	1281.67	1965.73	1734.57	2407.93	2048.95	2566.37	2013.83	1807.25	1833.07	1905.03	1819.54	1714.1	2019.03
1810.81	1587.79	1631.26	1267.03	1264.15	1772.87	1593.25	1845	1907.91	2073.89	1828.88	2025.15	1661.17	2010.74	1655.54	1858.19	1799.76	1897.93	1946.67	1353.84	1962.57	1434.49	1484.2	1383.25	962.378	1635.58	1758.81	2123.2	1890.86	1849.3	1743.75	1512.68	1619.93	1693.51	1502.6	1962.46	1787.35	1273.42	2003.07	1733.75	2431	2052.54	2551.44	2033.11	1790.19	1833.85	1907.75	1807.45	1721.4	2024.77
1801.23	1602.19	1664.12	1283.38	1292.7	1743.16	1595.73	1872.74	1942.57	2082	1819.94	2017.12	1667.4	2002.23	1670.48	1878.64	1782.11	1876.13	1959.32	1361.87	1970.83	1439.21	1495.64	1393.84	925.832	1598.45	1744.09	2111.06	1923.27	1836.7	1727.95	1524.76	1612.59	1683.78	1509.5	1970.28	1785.95	1284.49	1997.83	1736.57	2379.28	2065.92	2602.94	2059.28	1812.04	1833.45	1940.87	1814.76	1740.83	2027.62
1797.13	1584.45	1653.76	1264.69	1296.78	1761.14	1596.3	1862.2	1908.11	2081.06	1839.55	1997.73	1669.85	2011.88	1652.91	1883.29	1812.01	1880.27	1980.2	1349.81	1982.2	1483	1504.91	1393.33	953.179	1621.57	1759.87	2133.23	1929.16	1826.08	1715.17	1538.77	1598.93	1716.92	1512.1	1956.42	1792.13	1289.34	2012.98	1749.45	2388.49	2046.94	2595.98	2072.92	1822.69	1856.65	1916.13	1804.4	1727.24	2024.91
1780.21	1584.46	1673.74	1273.38	1319.7	1773.17	1570.4	1866	1934.55	2094.33	1857.1	2014.97	1667.49	2015.7	1644.21	1884.15	1800.19	1893.13	1996.61	1368.91	1993.91	1465.49	1514.7	1379.63	949.4	1603.97	1748.04	2149.96	1916.53	1838.2	1694.96	1521.38	1606.92	1702.44	1508.7	1952.97	1764.46	1288.74	1998.5	1742.57	2374.59	2002.11	2609.51	2072.38	1788.79	1847.13	1923.88	1804.22	1753.42	2022.67
1796.53	1596.8	1654.17	1254.05	1313.27	1739.51	1575.23	1869.48	1953.96	2068.01	1880.97	2022.12	1669.78	2015.84	1669	1886.68	1829.94	1886.38	2005.08	1347.95	1996.41	1446.78	1529.71	1419.28	963.766	1610.85	1771.68	2149.59	1912.15	1811.45	1704.76	1514.92	1616.58	1722.22	1497.08	1962.73	1760.4	1294.44	2013.76	1758.76	2394.97	2033.69	2618.99	2097.22	1812.7	1842.72	1943.57	1831.6	1792.99	2039.61
1794.89	1585.32	1682.82	1274.37	1288.11	1779.03	1572.82	1870.88	1956.97	2075.36	1882.52	2050.59	1679.68	2036.54	1657.74	1872.73	1821.06	1889.71	2015.15	1327.95	1997.92	1466.93	1518.13	1410.43	922.924	1602.18	1736.43	2158.51	1925.92	1820.33	1708.26	1526.19	1612	1710.25	1496.53	1982.62	1750.44	1273.3	1998.95	1766.69	2372.16	2011.44	2616.62	2092.3	1844.76	1830.48	1948.83	1819.95	1749.7	2047.34
1783.3	1580.27	1680.95	1269.1	1316.39	1759.51	1586.07	1860.02	1980.42	2072.76	1899.83	2055.76	1690.78	2049.39	1654.11	1892.05	1837.26	1866.9	2038.13	1353.42	1994.67	1459.12	1502.56	1406.31	946.763	1617.91	1762.92	2133.46	1924.04	1809.05	1695.08	1528.36	1649.63	1722.51	1502.36	1965.25	1742.32	1281	2012.58	1757.84	2386.45	1982.59	2623.17	2099.45	1826.94	1845.51	1977.92	1819.4	1780.28	2004.28
1773.94	1601.09	1707.62	1279.63	1321.76	1764.69	1605.4	1845.43	1993.33	2101.85	1905.91	2039.97	1666.68	2044.84	1675.3	1901.01	1806.56	1888.87	2059.96	1360.3	2043.86	1482.15	1528.16	1402.9	943.585	1631.9	1770.23	2162.79	1918.66	1804.59	1696.71	1525.69	1636.62	1747.23	1510.06	1977.98	1764.04	1277.52	2026.12	1761.09	2398.97	1986.63	2630.62	2134.33	1847.87	1845.79	1955.51	1827.3	1796.41	2025.08
1788.05	1575.98	1740.28	1260.94	1302.72	1747	1605.94	1892.67	1969.42	2094.14	1895.42	2034.15	1689.21	2016.35	1652.21	1886.78	1871.73	1879.58	2083.79	1368.07	2034.52	1447.27	1521.13	1401.07	944.169	1621.2	1784.92	2162.29	1953.72	1804.92	1690.17	1510.21	1639.23	1712.81	1522.11	1960.91	1768.88	1312.61	1984.18	1750.03	2376.71	1995.82	2620.73	2137.92	1818.24	1849.49	1970.43	1853.61	1816.66	2028.65
1780.7	1593.91	1733.79	1282.46	1326.42	1758.82	1576.59	1887.58	1923.23	2097.56	1891.04	2064.48	1686.76	2032.55	1663.47	1884.31	1805.76	1879.62	2074.97	1339.79	2067.72	1464.46	1526.96	1393.91	966.377	1624.83	1766.6	2157.52	1921.08	1782.7	1690.16	1515.5	1641.05	1734.41	1521.81	1967.52	1776	1290.29	2020.77	1745.18	2375.42	1986.54	2648.15	2152.92	1845.24	1841.9	1939.73	1830.62	1779.07	2011.95
1800.72	1577.72	1747.35	1292.06	1319.33	1743.31	1589.95	1880.14	1894.85	2090.6	1896.41	2055.36	1713.57	2056.8	1684.15	1865.97	1804.04	1879.55	2077.89	1345.39	2067.25	1508.83	1508.16	1391.14	965.182	1633.26	1781.31	2169.8	1918.33	1803.07	1705.08	1528.68	1660.26	1714.72	1515.01	1958.81	1778.4	1298.04	2010.46	1754.74	2375.62	2005.42	2638.7	2169.25	1833.5	1860.95	1955.38	1871.24	1803.38	2048.98
1775.52	1562.46	1774.47	1274.22	1294.78	1738.93	1599.75	1909.7	1913.8	2119.34	1896.83	2040.64	1704.03	2062.92	1697.7	1824.25	1819.5	1892.27	2094.39	1358.39	2068.18	1485.21	1506.9	1371.69	961.368	1637.78	1776.29	2173.96	1933.54	1794.51	1704.21	1508.38	1636.36	1737.32	1506.45	1953.71	1805.62	1308.42	2032.01	1770.03	2366.64	2016.52	2654.09	2146.83	1841.42	1864.39	1963.9	1854.48	1804.31	2056.61
1790.64	1584.19	1768.49	1276.85	1314.67	1740.79	1596.7	1878.26	1915.06	2111.65	1872.86	2052.65	1680.53	2059.41	1684.48	1903.55	1846.38	1915.51	2087.01	1380.97	2079.13	1469.04	1512.42	1376.29	978.451	1634.69	1774.44	2161.42	1919.84	1783.17	1666.75	1503.66	1651.39	1745.79	1516.27	1960.94	1803.73	1283.47	2058.06	1775.14	2377.83	2036.3	2646.38	2158.19	1824	1834.85	1937.04	1844.02	1782.14	2057.86
1773.74	1569.34	1771.24	1300.46	1324.97	1735.25	1597.67	1898.93	1910.7	2133.56	1882.05	2067.99	1688.21	2062.29	1703.25	1872.27	1859.63	1896.35	2117.04	1366.79	2064.87	1476.73	1520.39	1401.25	975.078	1642.61	1758.55	2175.45	1941.86	1773.07	1714.67	1502.98	1631.23	1745.94	1507.33	1939.34	1779.06	1303.43	2055.48	1787.23	2376.96	1989.88	2660.29	2143.64	1866.35	1850.29	1979.64	1831.8	1787.7	2089.63
1783.35	1575.41	1795.59	1285.88	1323.16	1771.04	1594.39	1917.39	1915.75	2147.49	1877.28	2061.21	1688.7	2072.81	1718.78	1883.45	1816.15	1903.04	2117.53	1346.88	2056.2	1509.77	1531.47	1384.09	976.638	1621.17	1773.83	2148.09	1921.23	1791.59	1721.35	1487.77	1647.78	1738.96	1513.14	1957.2	1814.31	1283.96	2046.36	1784.94	2395.6	1988.91	2607.41	2162.8	1866.13	1848.4	1954.61	1854.84	1797.49	2034.84
1785.86	1582.74	1790.95	1290.61	1330.66	1774.44	1608.05	1902.35	1947.09	2120.67	1858.98	2067.96	1674.59	2088.74	1705.73	1893.92	1844.08	1903.72	2133.5	1384.46	2080.14	1480.91	1545.53	1364.77	946.283	1623.52	1770.67	2157.91	1926.73	1823.16	1707.72	1503.65	1647.82	1735.9	1519.98	1931.57	1794.14	1326.56	2027.36	1791.07	2382.12	2023.96	2660.01	2163.38	1857	1861.69	1967.01	1837.95	1800.18	2060.17
1785.01	1577.59	1815.22	1282.78	1326.32	1746.92	1582.36	1911.54	1956.11	2133.42	1848.12	2100.54	1684.7	2078.49	1713.54	1896.42	1854.81	1888.69	2134.06	1381.04	2064.03	1521.61	1522.69	1364.02	965.525	1636.92	1771.41	2207.07	1926.82	1839.55	1687.66	1523.9	1651.63	1760.41	1507.9	1937.18	1798.43	1322.43	2054.69	1797.32	2393.83	2013.92	2614.48	2166.42	1848.74	1850.97	1973.08	1847.97	1810.99	2061.96
1788.08	1605.9	1807.28	1282.75	1338.65	1758.44	1598.58	1916.84	1971.43	2141.11	1874.98	2068.81	1688.22	2065.2	1713.54	1888.13	1853.37	1922.4	2155.11	1392.51	2061.79	1486.16	1548.45	1365.52	958.141	1629.89	1760.23	2202.85	1941.64	1838.15	1698.56	1490.09	1656.46	1717.84	1515.01	1926.31	1793.48	1326.91	2042.52	1792.99	2400.27	2011.12	2636.46	2170.55	1836.55	1865.03	1966.6	1855.59	1816	2059.05
1779.54	1572.43	1833.71	1296.24	1335.24	1743.6	1595.2	1915.16	1975.82	2166.39	1854.07	2064.79	1690.64	2066.17	1720.71	1855.92	1848.52	1911.27	2142.84	1384.97	2080.34	1512.44	1551.74	1416.23	949.721	1621.43	1770.13	2208.6	1947.58	1844.47	1719.66	1486.77	1667.18	1735.71	1518.63	1940.87	1802.54	1302.42	2033.27	1764.45	2424.63	2034.16	2638.97	2179.89	1875.59	1882.86	1956.49	1875.58	1840.93	2057.88
1768.84	1583.65	1842.95	1289.54	1330.06	1721.45	1588.43	1898.57	1950.99	2137.37	1862.05	2097.03	1703.01	2066.27	1705.26	1885.2	1861.25	1913.66	2167.09	1404.88	2095.03	1494.57	1519.01	1383.63	959.732	1644.46	1761.32	2219	1927.47	1835.6	1711.87	1496.21	1662.78	1790.63	1535.7	1947.83	1776.43	1313.47	2016.48	1752.53	2448.68	2009.77	2643.64	2185.6	1882.18	1856.89	1974.26	1863.12	1827.72	2076.62
1783.25	1609.72	1843.79	1282.33	1327.91	1754.94	1604.84	1893.95	1953.2	2145.54	1884.78	2084.43	1692.86	2087.2	1683.34	1897.84	1850.32	1894.93	2189.9	1393.61	2081.63	1502.77	1535.81	1368.78	964.791	1652.08	1786.25	2198.32	1924.82	1833.77	1718.29	1473.95	1653.9	1787.75	1539.12	1933.12	1792.25	1335.69	2027.46	1795.27	2439.59	2022.84	2631.02	2209.22	1859.22	1873.63	1975.3	1871.46	1836.56	2058.07
1777.09	1588.15	1838.94	1284.34	1358.32	1734.13	1616.09	1913.74	1981.49	2148.11	1870.96	2067.75	1686.76	2090.33	1709.01	1890.43	1888.26	1899.95	2164.11	1387.28	2103.06	1503.02	1528.92	1381.3	971.709	1660.58	1810.89	2235.9	1923.61	1834.12	1719.79	1482.61	1670.77	1775.07	1502.77	1949.25	1805.72	1331.12	2067.21	1811.79	2413.94	2030.4	2670.89	2210.37	1875.5	1878.02	1988.12	1875.24	1835.22	2085.36
1770.01	1612.54	1855.73	1299.09	1329.2	1742.67	1619.9	1918.91	1957.66	2165.76	1890.5	2093.18	1715.13	2109.7	1721.81	1862.83	1884.71	1893.21	2177.09	1378.03	2088.99	1507.86	1500.25	1392.95	961.175	1643.55	1779.69	2223.91	1941.91	1828.84	1715.69	1492.71	1656.94	1779.02	1529.45	1962.55	1798.4	1328.55	2057.65	1802.07	2418.25	2026.79	2663.06	2203.61	1866.4	1890.18	1963.03	1865.04	1849.2	2083.49
[truncated: 54 more columns]

## Sheet: M
2	3	3	4	4	5	5	5	5	6	6	6	6	7	7	7	7	8	8	9	9	9	9	10	11	11	11	11	12	12	12	12	13	13	14	14	14	14	14	5	5	5	5	5	5	5	5	5	5	5
1	1	2	1	2	1	2	3	4	1	2	3	4	1	2	3	4	1	2	1	2	3	4	1	1	2	3	4	1	2	3	4	1	2	1	2	3	4	5	1	2	3	4	5	6	7	8	9	10	11
292.09	296.466	281.126	255.034	240.305	261.821	296.244	299.176	349.161	328.612	216.235	303.586	249.014	263.428	253.634	280.634	285.614	289.601	301.096	214.613	304.903	247.67	256.745	227.331	145.512	304.997	251.935	337.92	293.911	275.125	240.561	212.058	232.83	225.265	245.037	268.536	298.132	170.015	301.975	253.523	302.353	275.794	343.932	265.198	281.869	239.239	286.247	236.506	245.57	272.759
289.279	294.233	280.882	254.29	238.85	265.275	290.257	304.097	343.119	329.5	215.901	309.606	253.201	268.974	253.668	277.946	280.832	288.679	305.341	217.234	304.36	254.867	253.012	223.277	156.364	305.597	250.513	335.588	295.377	274.062	242.116	217.734	228.709	222.633	247.447	269.33	301.687	172.248	300.098	251.38	299.51	274.228	348.139	266.009	285.814	245.359	292.767	236.429	253.179	278.638
287.058	298.578	279.704	264.565	247.303	269.907	292.767	300.454	341.997	328.845	224.01	313.15	251.746	272.129	255.156	286.036	289.522	286.491	302.753	223.555	307.992	252.746	248.736	221.9	151.776	309.429	245.104	338.165	295.844	274.162	240.227	222.366	237.695	217.09	248.758	268.341	295.955	176.325	310.162	257.478	312.05	270.852	341.641	259.666	279.16	241.538	293.989	234.896	252.979	280.671
284.425	293.434	282.681	259.599	248.025	271.018	294.356	304.93	335.799	326.735	214.646	312.328	250.969	271.063	246.115	281.748	288.324	288.713	306.341	224.499	308.207	255.078	254.767	224.099	147.289	316.06	249.147	335.921	299.032	273.951	242.127	223.955	231.052	216.046	242.16	274.517	300.698	170.349	308.396	257	312.395	273.084	339.697	258.744	282.315	234.873	293.034	236.673	254.245	275.994
287.857	305.485	285.825	256.023	238.295	263.654	295.822	304.93	334.943	333.932	210.525	309.729	251.046	267.752	251.202	281.859	282.27	286.102	302.953	218.545	303.786	254.59	252.024	240.616	146.589	306.852	247.336	340.253	291.912	269.774	243.471	225.265	229.597	219.978	246.526	279.404	294.933	175.825	304.863	253.257	301.92	272.806	341.286	265.175	282.859	239.194	293.578	229.719	252.768	275.217
284.27	296.777	292.956	249.103	238.972	267.819	290.123	310.817	341.141	334.432	211.598	311.972	239.983	268.897	251.113	286.236	277.538	287.335	306.663	212.891	302.375	248.547	253.157	231.808	148.577	306.385	249.38	343.274	291.09	271.462	248.503	225.143	232.019	216.379	246.925	275.483	296.144	176.524	309.04	255.956	303.275	274.684	341.064	269.219	292.234	237.773	287.391	231.963	244.882	264.254
284.203	301.087	291.301	245.359	253.079	265.909	299.543	301.875	350.961	333.544	212.941	313.672	248.98	268.197	246.803	284.936	272.518	282.615	302.064	209.981	305.352	250.794	247.981	232.63	150.866	317.404	256.389	328.99	292.167	272.273	247.847	218.956	224.732	222.422	244.937	286.158	292.867	179.446	313.339	254.756	314.538	264.42	342.052	278.483	289.59	237.573	288.713	232.741	242.005	279.26
288.191	302.087	287.946	250.213	250.791	258.755	289.035	301.276	341.619	332.722	204.316	310.739	245.937	265.675	244.315	277.872	271.729	293.567	301.287	220.045	306.874	253.949	250.447	228.898	151.646	318.815	254.323	330.078	291.556	273.306	247.236	219.023	226.243	221.9	246.092	285.625	292.845	178.346	312.606	255.445	308.773	266.997	342.674	271.474	292.934	235.562	288.591	235.221	238.372	275.583
287.391	303.797	281.104	258.489	249.502	250.391	289.49	307.552	341.33	321.681	205.349	314.842	246.951	265.609	246.181	281.77	273.651	290.068	300.954	221.5	303.086	248.695	249.414	229.664	154.549	316.926	256.4	342.485	298.554	275.039	245.493	217.645	231.797	221.433	242.16	289.624	294.989	173.525	308.118	256.034	310.562	266.919	347.795	273.573	297.71	239.272	289.89	235.232	237.839	268.13
285.258	300.776	277.472	260.666	248.947	255.701	288.324	313.95	344.118	319.803	208.137	312.753	249.487	268.541	243.76	281.87	279.519	280.937	300.509	222.922	299.367	251.65	255.978	231.674	147.27	308.529	256.267	338.109	287.88	275.828	247.77	217.179	232.952	224.321	244.115	283.437	299.187	167.883	302.087	253.368	324.013	272.395	351.305	276.361	298.132	236.129	293	234.477	241.36	265.153
289.202	302.286	280.948	268.841	243.76	256.989	294.2	307.363	341.452	326.59	209.337	312.72	251.82	272.062	244.093	281.459	277.12	286.391	302.942	209.381	295.411	251.028	255.789	229.632	151.183	316.116	257.811	337.554	289.735	272.118	244.504	223.899	238.717	226.209	245.604	286.036	303.342	170.104	305.819	256.411	319.615	270.252	347.895	276.872	295.877	237.628	294.467	235.155	241.894	262.61
286.202	302.764	277.205	251.202	257.6	261.332	297.288	303.808	327.19	326.235	211.692	316.597	257.607	270.796	248.162	279.416	277.742	282.381	303.942	216.146	307.229	251.905	257.211	230.543	152.438	313.561	256.434	334.977	295.033	273.062	244.671	228.209	237.373	225.565	247.614	283.226	308.062	169.282	302.186	258.378	319.937	268.941	345.296	280.493	301.198	235.962	292.356	234.177	234.496	261.532
285.825	298.532	272.862	259.777	250.269	259.544	294.911	303.775	327.101	327.868	203.505	313.942	255.596	271.185	251.707	284.658	276.031	284.969	304.675	217.323	300.109	251.883	259.777	229.754	148.451	317.249	258.222	331.711	297.177	273.606	242.693	228.775	234.607	221.122	241.827	286.08	300.72	167.161	296.955	250.424	317.648	270.707	348.273	272.684	300.665	231.93	294.022	235.143	242.493	263.989
287.646	303.664	271.329	260.399	247.747	261.365	295.811	301.253	333.955	324.402	201.806	314.83	254.274	265.42	245.298	280.326	274.831	285.636	305.363	210.803	311.439	251.35	258.089	233.498	144.663	317.138	252.435	332.633	295.966	273.951	245.004	222.866	234.151	220.811	248.547	282.17	304.297	167.238	300.731	247.625	321.125	270.785	352.793	266.753	301.653	230.775	299.965	233.711	238.428	267.843
289.846	306.363	275.395	283.725	245.615	255.801	294.811	303.619	342.996	329.156	209.618	316.885	254.496	259.633	242.798	279.904	271.155	285.38	304.264	218.834	318.537	252.516	261.266	225.211	141.02	317.571	254.012	330.944	292.312	274.517	245.792	219.6	230.441	219.134	244.571	283.981	304.019	164.661	299.21	248.014	319.037	276.35	354.237	273.117	301.076	228.053	296.122	232.989	237.795	269.287
295.522	295	275.061	298.265	243.849	255.867	295.922	302.153	345.64	332.777	210.618	318.774	253.364	261.776	249.022	283.248	268.222	284.714	301.16	222.122	320.548	251.661	260.81	232.165	149.717	314.927	256.756	333.434	292.323	273.728	249.68	216.69	232.374	222.066	241.094	283.192	304.652	170.904	291.923	244.671	326.524	266.397	356.092	266.331	297.821	236.865	294.966	237.11	236.706	268.376
286.824	297.988	282.709	301.153	244.659	258.1	293.9	301.52	349.55	341.364	198.518	309.454	259.006	263.254	244.279	280.937	269.844	284.536	302.394	212.569	312.961	253.316	259.61	229.277	148.573	312.917	256.9	332.414	291.923	274.45	256.078	219.234	229.742	223.41	243.338	282.326	306.041	169.815	294.522	245.004	319.259	263.409	359.047	266.253	305.086	240.986	296.299	233.877	236.629	267.532
288.702	297.921	277.754	288.346	242.482	257.822	295.255	300.509	343.696	340.808	209.053	310.943	257.907	260.899	250.088	278.305	267.056	293.034	301.353	209.303	318.615	252.172	259.71	230.921	150.219	313.294	259.355	332.192	296.688	272.629	250.191	214.846	231.944	220.278	242.804	281.426	311.384	170.326	303.386	247.803	321.136	269.696	359.08	261.288	306.963	234.766	297.677	233.3	241.083	261.889
288.879	301.42	281.153	285.303	252.379	257.078	293.678	298.643	344.84	336.509	206.297	313.142	256.574	263.143	251.055	282.204	272.688	288.046	306.196	213.635	325.502	249.173	257.256	235.042	153.564	307.74	249.18	332.359	301.131	273.04	255.367	215.99	235.164	221.433	248.914	280.449	309.495	169.804	299.576	244.426	330.511	271.696	354.759	265.364	310.739	238.12	293.467	231.445	241.627	261.201
280.649	307.507	281.998	279.46	255.589	257.267	298.754	304.686	342.996	334.743	205.173	311.476	251.242	261.465	249.133	284.081	278.478	289.546	303.908	210.847	319.681	252.183	260.177	232.087	150.231	315.494	255.556	325.427	292.167	278.072	259.488	217.312	236.641	224.965	253.523	275.172	315.271	166.739	303.853	250.069	318.071	279.927	355.926	265.103	306.352	234.888	298.565	231.689	240.794	260.801
285.769	306.419	283.819	283.148	262.443	249.425	295.389	300.969	353.915	341.053	206.238	309.688	247.887	261.143	251.444	282.159	279.1	291.59	303.675	210.303	319.159	255.404	259.155	238.652	149.676	312.172	249.191	332.347	301.031	280.226	251.424	214.213	237.43	223.566	252.368	281.026	311.795	168.116	304.652	247.014	323.336	274.984	350.383	270.945	313.528	236.521	291.69	226.413	239.75	259.446
281.326	308.84	290.962	275.417	256.767	244.793	291.09	302.88	347.562	340.686	207.904	303.301	252.464	255.656	241.71	280.726	277.445	286.291	308.518	225.754	317.948	251.094	261.577	236.419	149.754	308.84	256.47	335.346	294.689	278.782	255.334	216.812	234.542	225.454	250.669	283.792	313.561	168.638	301.631	246.359	319.226	277.35	350.516	270.434	308.951	235.554	295.466	224.635	239.394	261.689
280.993	312.106	287.218	286.766	257.422	247.425	288.046	302.378	342.308	331.567	207.526	305.944	248.798	259.444	241.976	286.047	273.102	287.113	302.92	213.613	316.26	247.651	254.101	232.409	156.085	312.994	254.915	333.914	287.48	276.75	252.413	217.634	240.929	225.71	249.258	279.893	321.903	164.65	300.032	244.837	312.383	276.55	357.947	269.957	306.618	232.2	293.522	221.181	236.34	260.78
288.683	312.139	279.92	286.819	264.498	250.158	286.958	305.523	341.941	327.434	212.647	309.699	249.187	260.843	241.288	281.237	276.279	287.413	305.774	215.124	318.748	250.239	257.978	229.599	155.03	309.118	254.249	331.126	289.313	277.305	252.357	227.031	236.786	224.51	243.782	279.671	317.304	163.14	300.154	241.583	313.539	275.528	352.76	270.59	308.24	233.811	295.444	223.314	233.629	266.747
284.873	318.748	284.341	285.564	259.755	258.644	295.444	302.535	345.851	329.189	205.904	308.899	253.897	258.011	248.63	285.114	272.946	286.369	306.73	218.445	318.726	254.086	252.99	232.476	160.384	303.464	249.828	328.815	286.102	272.873	250.624	222.244	238.33	225.099	248.63	281.182	321.325	165.572	301.042	241.516	317.304	273.195	350.283	267.546	317.415	231.778	294.733	224.891	236.529	270.323
289.949	307.285	282.942	285.574	261.054	248.547	302.475	300.534	344.851	331.611	204.871	294.17	254.519	263.048	253.951	283.292	274.546	284.57	309.818	213.813	318.515	253.763	261.932	230.41	158.718	303.964	254.841	328.46	292.178	274.684	246.326	223.966	235.853	228.353	247.863	281.171	324.602	163.284	301.92	238.583	312.817	273.717	349.328	271.69	315.36	229.467	294.4	223.425	235.851	267.113
287.05	311.895	274.8	279.502	262.254	257.3	303.442	307.878	346.24	333.421	207.715	307.722	252.375	256.711	258.549	280.737	272.347	286.68	306.174	210.414	313.883	253.786	262.21	232.087	158.362	310.351	253.508	332.005	296.333	265.409	251.913	221.689	232.443	227.376	248.175	281.826	320.548	166.161	298.899	243.249	316.082	275.228	350.294	270.623	314.472	229.156	296.755	224.724	237.139	266.48
283.595	314.138	269.812	278.267	259.877	255.745	303.008	305.969	354.337	329.712	201.528	302.64	251.975	275.15	260.782	277.627	269.359	286.669	306.296	208.07	315.36	260.917	257.522	230.476	157.185	308.285	252.73	331.849	293.2	265.087	245.159	221.777	232.065	227.476	246.188	278.405	327.468	173.925	303.564	246.97	313.172	282.237	348.295	275.311	304.841	230.878	293.2	223.547	237.717	266.98
288.072	315.371	281.292	275.433	262.809	259.477	299.287	302.77	348.184	326.068	200.095	301.659	250.242	268.353	258.416	269.752	272.958	280.471	305.086	210.881	321.969	261.628	253.657	231.176	150.776	316.204	259.743	330.516	289.346	275.528	240.938	225.532	232.043	228.698	252.846	281.104	329.378	172.515	301.076	242.427	310.451	279.371	345.54	272.301	318.781	233.879	300.876	229.701	236.24	264.925
292.237	308.318	274.394	267.091	265.109	262.576	296.344	306.16	350.738	326.435	201.928	297.139	252.153	267.756	264.47	272.551	272.658	284.192	306.03	208.593	317.549	258.551	258.922	236.108	147.565	312.806	259.276	332.005	288.568	271.773	240.716	222.3	232.176	225.176	254.288	282.137	330.689	176.391	305.041	242.171	303.375	274.328	344.107	264.192	313.961	235.102	301.387	227.879	233.596	261.426
280.596	309.04	275.127	281.942	263.032	264.542	292.467	311.617	350.427	318.893	210.351	300.979	252.73	263.898	259.949	274.043	273.324	284.847	305.141	207.548	314.638	253.819	258.289	231.932	146.877	310.728	259.132	329.683	287.813	275.694	241.26	225.81	230.288	225.621	253.158	281.57	329.734	173.148	299.376	243.926	303.542	271.707	344.296	265.58	317.371	237.768	300.209	226.513	242.027	264.547
282.651	307.185	275.094	281.376	259.288	258.911	289.435	306.907	351.216	328.201	210.207	303.778	252.264	256.767	260.171	281.06	275.112	280.749	306.43	207.882	318.87	253.519	259.966	236.275	146.233	310.051	259.687	330.661	297.021	261.721	248.147	213.28	230.776	225.632	242.678	280.915	330.656	172.959	298.854	243.504	303.286	273.551	338.82	252.529	315.805	237.002	296.91	225.724	228.509	260.126
287.239	306.307	280.67	286.352	259.244	263.798	291.212	309.529	352.527	327.679	205.593	295.614	255.696	270.357	259.516	272.412	274.413	287.158	310.784	206.56	321.769	254.952	261.954	236.319	151.264	310.029	262.231	328.795	289.835	273.129	243.36	223.799	230.01	223.91	223.828	275.539	334.377	175.747	297.443	242.949	301.764	272.784	344.907	252.918	324.08	235.88	295.011	224.735	234.618	260.626
283.84	299.054	284.791	289.074	259.166	263.587	288.957	302.62	352.716	326.746	210.659	302.701	256.707	269.768	257.905	271.069	275.468	282.859	306.674	210.603	314.105	250.439	256.056	228.921	151.753	311.884	258.743	330.372	293.3	266.919	245.959	220.978	229.588	226.143	237.724	279.282	334.888	177.069	296.322	248.269	308.951	276.81	344.774	258.46	317.049	236.404	296.833	227.057	238.95	262.803
286.728	304.464	281.525	295.716	258.811	259.744	293.845	299.954	353.493	327.734	210.018	295.658	256.596	272.267	258.649	270.769	273.346	287.224	305.497	207.204	313.683	243.174	260.199	230.565	154.441	311.139	258.41	328.328	286.613	264.553	245.992	228.198	229.377	227.598	245.177	278.205	338.887	177.035	295.544	245.704	298.01	281.253	342.485	255.172	318.815	236.692	298.177	230.667	234.229	263.859
281.94	305.941	285.535	291.073	260.455	261.054	290.49	299.332	351.105	326.546	208.626	294.226	257.818	268.202	258.16	268.508	274.035	283.181	305.308	207.615	319.081	248.306	256.678	235.342	154.108	318.859	261.942	327.328	295.244	265.053	240.283	220.544	232.289	225.499	245.433	272.651	339.286	172.826	295.588	246.781	305.863	278.421	338.464	256.95	319.037	233.86	295.133	229.801	230.319	258.26
278.964	303.764	282.347	289.163	254.612	261.61	293.345	294.889	355.77	325.205	207.837	290.36	263.794	267.291	258.816	271.542	271.714	281.126	302.32	207.426	317.404	252.238	260.743	224.8	152.197	320.492	258.221	326.606	291.801	268.811	238.783	224.432	235.843	224.221	246.299	280.593	338.053	175.514	294.256	248.625	308.94	277.854	346.506	258.694	315.482	236.037	299.41	227.823	233.118	259.282
281.041	306.496	278.904	295.016	254.423	261.299	294.489	311.428	354.704	322.45	223.894	294.059	265.626	264.803	252.984	272.864	273.802	284.636	304.164	212.891	318.171	240.964	263.043	228.299	151.131	320.403	261.098	325.107	290.001	270.788	238.006	219.656	232.478	223.699	245.166	279.804	344.429	171.226	294.033	246.77	304.441	278.721	343.729	258.338	313.161	233.771	301.642	227.679	235.173	260.238
281.185	300.709	282.714	282.809	254.034	261.732	298.265	301.387	352.871	321.962	225.621	294.648	265.504	267.458	256.861	270.587	271.38	294.289	304.119	204.749	318.848	241.83	261.166	232.087	148.521	320.203	258.088	333.138	291.179	274.954	241.805	218.423	233.655	222.666	240.034	273.784	342.073	174.669	294.478	247.525	303.786	278.054	345.251	260.96	316.949	234.071	301.087	230.101	235.507	260.715
284.44	310.451	287.801	283.686	253.757	259.144	299.287	304.364	353.06	322.617	211.117	295.025	263.683	268.713	255.272	268.754	274.246	291.579	302.486	207.626	316.727	246.807	262.854	229.943	151.253	319.726	258.221	331.183	290.568	277.797	240.15	218.534	234.388	220.556	245.066	273.406	340.296	179.135	299.298	249.258	305.708	276.011	342.319	266.336	320.481	232.86	297.232	229.712	246.492	258.171
283.562	306.274	280.459	283.02	256.845	255.034	294.133	297.666	350.383	316.708	211.373	294.037	262.783	265.714	257.794	267.987	275.112	289.179	302.331	217.245	317.482	244.096	262.554	231.143	147.843	316.182	257.299	332.171	291.79	276.209	247.717	218.356	230.389	225.854	245.855	275.683	347.084	178.213	294.289	245.815	303.63	275.277	338.72	259.427	319.592	233.482	300.787	231.167	237.362	258.316
281.163	303.108	282.058	286.663	260.477	255.956	296.366	304.919	350.15	314.375	224.735	294.381	262.005	268.235	253.928	268.709	275.146	290.457	297.821	215.068	315.216	244.618	261.899	224.245	144.766	313.028	256.744	325.251	288.646	269.522	245.529	218.801	229.545	221.189	244.988	279.549	345.438	170.36	294.167	246.481	309.94	278.099	345.196	254.173	320.914	231.394	302.142	228.579	241.294	255.828
278.708	308.784	276.882	265.447	264.62	256.856	291.645	293.9	347.795	313.709	222.892	294.47	255.629	267.269	253.129	265.333	275.29	283.959	301.875	212.725	316.316	245.607	265.775	223.323	147.899	315.149	254.522	325.307	293.689	269.8	245.542	219.2	226.502	222.1	246.366	277.772	347.016	162.473	302.164	243.815	308.873	282.564	345.629	262.659	318.126	233.649	297.677	233	239.45	255.628
280.707	307.44	276.893	284.197	263.032	258.022	294.933	294.3	347.106	319.029	222.481	292.537	262.394	266.491	254.017	268.298	278.045	285.336	300.054	214.102	315.827	242.863	265.942	222.568	146.199	314.516	252.978	331.453	289.29	274.598	246.797	221.233	230.3	225.698	241.778	281.859	352.238	173.436	302.398	247.348	306.907	279.187	350.494	260.415	322.08	238.284	300.431	227.257	236.295	260.071
273.099	309.895	282.447	286.819	258.888	254.845	290.601	297.21	347.984	320.24	216.56	296.847	260.395	266.069	251.451	265.999	277.29	283.059	302.077	213.591	316.538	249.517	260.599	222.023	149.589	315.738	252.245	331.02	301.398	269.022	253.743	219.134	231.778	222.011	244.122	277.416	348.75	175.802	297.543	240.616	313.927	277.721	341.108	275.622	302.642	235.177	298.021	232.5	242.105	263.964
279.73	311.628	274.916	282.931	256.245	258.57	291.645	296.366	348.706	321.973	218.904	295.114	258.829	262.015	254.628	265.322	276.334	290.634	302.788	213.613	319.515	242.175	261.999	225.023	152.856	314.483	252.956	338.651	298.721	270.177	253.287	217.234	232.255	221.278	242.445	276.083	353.216	178.035	286.125	244.015	310.162	276.921	339.064	257.938	311.972	236.316	303.975	231.889	240.139	269.151
280.174	316.582	273.228	280.543	256.511	261.402	292.778	285.869	350.639	329.193	213.217	297.325	256.663	265.503	252.906	266.743	280.178	285.592	300.067	213.169	313.528	243.83	262.21	224.712	152.878	314.538	250.29	327.898	288.357	276.309	249.011	214.413	237.076	222.666	236.213	278.494	352.882	179.168	294.122	237.406	305.541	275.5	339.62	265.701	302.753	241.77	299.21	231.545	238.894	275.36
284.295	310.751	274.349	286.897	258.533	266.467	293.889	292.278	355.37	329.082	205.33	299.357	256.962	264.347	248.552	267.965	275.512	285.98	300.3	213.369	315.627	247.073	258.977	227.788	154.944	311.561	251.423	331.164	296.833	270.866	249.666	215.724	237.52	222.344	237.635	279.482	351.86	181.901	313.905	248.436	307.496	276.377	340.542	265.162	317.671	237.738	302.764	225.957	238.906	276.193
282.196	305.719	277.815	283.242	254.523	264.468	293.367	291.956	353.882	328.96	203.164	295.914	258.384	265.558	245.942	263.4	275.435	285.869	300.822	209.548	316.771	243.963	255.045	219.635	154.756	316.238	253.156	328.265	299.11	269.633	250.434	215.657	241.131	219.345	239.834	274.006	353.093	177.78	302.764	240.405	302.986	276.022	340.508	265.612	318.993	244.292	299.898	229.667	242.393	275.76
279.919	307.329	273.894	283.609	253.934	263.313	293.567	293.167	348.05	322.084	199.565	299.58	257.607	268.191	246.164	263.122	276.112	285.68	299.511	203.472	316.338	242.897	260.355	224.734	158.399	312.106	253.145	327.676	293.4	270.077	246.369	218.712	243.441	217.967	233.692	277.405	343.724	185.189	270.518	238.039	304.608	273.6	337.065	265.779	318.881	237.394	299.965	232.178	240.561	275.471
282.996	309.351	278.615	286.797	252.746	267.1	299.21	289.002	350.938	321.673	197.477	294.725	259.662	264.292	247.497	265.477	277.212	284.414	304.111	201.25	312.628	243.063	257.3	223.09	152.045	312.628	249.979	332.508	294.433	271.577	250.347	216.901	244.696	218.167	238.635	272.607	344.158	182.978	300.842	249.391	303.842	275.166	335.799	262.621	320.137	229.108	298.843	226.802	239.528	278.237
278.852	308.629	277.715	273.101	253.346	264.446	299.809	292.201	351.916	319.885	199.976	295.636	252.119	270.027	247.886	261.223	277.201	283.359	302.723	203.35	313.183	245.762	257.078	221.846	157.444	313.139	248.679	328.809	296.122	271.399	250.527	214.757	239.442	217.579	239.568	273.806	340.024	184.578	304.175	245.259	307.241	275.155	334.632	262.798	316.604	233.34	296.288	233.844	240.572	279.948
282.651	300.232	277.126	284.297	253.457	262.013	301.553	297.455	350.261	317.219	200.465	305.459	254.919	271.115	246.031	261.289	274.646	280.848	303.301	209.703	312.672	242.03	251.457	225.156	152.656	313.516	247.902	324.71	293.956	275.309	248.392	218.445	239.886	221.722	240.523	278.671	340.724	181.079	299.965	244.515	311.617	276.044	345.14	262.654	315.927	236.428	301.875	237.209	240.738	279.115
283.329	310.806	280.314	287.274	257.444	263.746	303.742	289.89	355.404	327.519	202.264	304.037	253.452	272.593	247.919	265.322	279.322	283.148	303.19	203.705	311.317	244.307	255.001	222.412	157.344	314.627	252.078	324.766	294.8	272.999	248.925	213.935	236.465	217.912	243.877	270.463	334.111	182.823	302.908	245.737	310.562	274.022	338.12	265.675	317.815	239.849	298.532	235.621	238.417	279.159
280.319	301.564	275.827	292.661	251.635	260.502	303.542	294.322	355.17	327.574	205.419	302.837	243.367	270.16	250.363	268.387	276.834	282.259	298.102	204.694	306.563	242.819	254.312	220.713	153.967	312.139	252.434	325.232	295.577	268.567	252.293	217.557	235.021	219.467	245.699	277.25	338.788	182.589	299.943	244.026	313.739	273.389	343.241	255.445	319.492	242.97	301.076	231.656	241.916	272.95
279.452	306.119	273.772	294.516	248.703	263.224	300.243	287.68	361.646	327.608	207.274	299.583	251.586	272.726	251.64	267.576	276.245	285.747	300.69	202.539	303.519	248.639	258.468	216.336	153.789	316.027	252.056	330.92	295.566	268.878	253.326	214.88	233.777	217.49	239.657	277.294	337.31	177.669	298.799	249.436	317.582	273.945	341.019	257.8	320.448	240.382	303.008	235.843	239.439	276.549
278.264	307.629	276.282	291.562	250.435	262.879	300.987	281.704	354.46	323.753	203.453	298.561	250.564	271.104	252.284	265.41	278.945	288.524	299.524	202.583	303.197	248.384	255.325	221.002	157.244	317.715	252.434	323.666	298.365	272.421	255.236	212.502	236.288	219.845	248.809	269.33	334.454	180.434	298.81	243.926	312.395	272.434	341.686	250.791	321.525	238.871	300.42	233.977	240.316	275.26
277.953	311.284	276.404	297.649	245.426	256.193	299.865	290.279	350.472	325.464	203.286	301.782	254.496	269.76	249.174	267.188	275.446	289.701	295.647	204.916	300.876	246.684	250.858	221.39	154.633	316.982	253.822	329.887	296.477	273.143	247.45	217.001	237.954	222.411	247.421	271.929	342.762	178.724	300.054	244.648	312.772	272.345	344.54	262.387	317.426	234.384	300.72	235.654	239.761	278.348
278.453	303.886	270.595	291.64	247.325	258.425	295.022	284.603	355.293	323.076	208.129	297.828	256.374	275.758	245.897	266.255	278.678	289.346	301.468	206.26	308.129	248.706	255.693	222.623	152.501	320.625	256.133	333.663	291.612	272.41	247.005	221	236.976	217.79	246.399	273.117	344.14	180.379	301.042	242.316	310.673	275.511	351.638	253.879	318.648	241.604	300.62	237.476	237.65	275.371
281.396	309.529	272.739	292.517	249.525	254.837	298.099	292.145	352.949	325.831	207.952	295.051	256.329	273.07	249.374	266.455	279.955	286.669	299.313	205.904	306.641	243.363	254.503	223.69	155.411	315.005	252.023	333.674	293.989	282.051	246.372	220.333	236.154	220.189	248.876	272.806	343.81	181.012	298.576	242.171	311.539	272.812	346.806	259.544	317.537	241.148	299.909	238.587	238.539	274.583
285.473	316.138	272.861	302.114	250.069	251.05	300.176	292.8	357.514	321.932	208.063	293.651	254.785	270.249	249.307	267.421	278.067	290.89	299.269	206.449	304.13	249.195	250.926	222.868	153.456	310.451	254.4	329.22	290.035	275.82	243.74	218.19	234.766	218.067	247.31	277.794	342.166	179.968	297.699	246.437	310.973	277.199	345.718	264.542	318.526	239.227	299.854	238.209	237.85	271.806
[truncated: 54 more columns]

## Sheet: D
2	3	3	4	4	5	5	5	5	6	6	6	6	7	7	7	7	8	8	9	9	9	9	10	11	11	11	11	12	12	12	12	13	13	14	14	14	14	14	5	5	5	5	5	5	5	5	5	5	5
1	1	2	1	2	1	2	3	4	1	2	3	4	1	2	3	4	1	2	1	2	3	4	1	1	2	3	4	1	2	3	4	1	2	1	2	3	4	5	1	2	3	4	5	6	7	8	9	10	11
1769.79	1671.1	1767.37	1357.94	1245.1	1809.84	1689.48	2032.49	1904.87	2092.92	1876.01	2036.57	1736.26	2034.59	1660.78	1815.09	1904.53	1573.02	2097.91	1281.67	2030.26	1446.61	1510.36	1399.85	992.404	1660.61	1870.41	2054.56	1618.41	1796.92	1643.16	1469.36	1495.73	1665.39	1496.57	2215.95	1772.97	1355.11	2060.57	1584.46	2472.24	1983.79	2571.31	1899.25	2006.54	1751.02	1984.98	1782.78	1799.84	2127.5
1779.93	1678.7	1759.61	1358.4	1256.48	1785.46	1650.15	2025.81	1902.89	2072.8	1871.41	2035.55	1730.13	2057.43	1650.86	1813.12	1891.55	1589.27	2100.9	1259.39	2009.17	1417.46	1511.32	1411.14	986.785	1640.68	1864.47	2082.42	1636.57	1790.37	1673.26	1471.68	1513.4	1672.12	1506.43	2209.86	1800.3	1349.47	2061.3	1563.56	2460.08	1953.24	2565.47	1888.88	1999.93	1752.26	1972.08	1801.22	1802.5	2127.58
1763.35	1652.23	1761.7	1345.86	1223.22	1774.7	1654.36	2033.4	1886.24	2062.33	1881.26	2029.68	1732.25	2041.61	1624.83	1808.24	1877.57	1602.39	2117.03	1253.46	2007.54	1428.8	1545.5	1427.05	973.001	1640.75	1842.58	2104.41	1660.42	1798.82	1662.48	1463.67	1532.6	1695.76	1523.05	2210.39	1803.27	1342.62	2067.14	1609.76	2436.41	1958.75	2552.32	1934.31	1996.6	1737.5	1955.36	1796.9	1789.81	2142.97
1747.13	1662.29	1740.41	1355.61	1243.38	1783.13	1617.58	2013.39	1920.79	2043.7	1885.41	2013.88	1736.76	2029.75	1648.17	1825.15	1882.68	1622.51	2094.63	1241.15	2018.28	1431.17	1524.02	1416.23	984.999	1645.18	1837.23	2070.93	1705.21	1822.73	1711.89	1491.62	1515.63	1709.32	1512.4	2187.13	1804.79	1343.46	2036.44	1613.22	2434.81	1932.62	2547.93	1942.92	1978.64	1747.66	1953.77	1782.95	1796.89	2140.99
1741.5	1666.82	1732.44	1339.44	1226.81	1755.36	1620.7	1994.58	1905.06	2059.05	1876.02	2016.21	1738.22	2032.65	1627.69	1799.06	1893.02	1646.81	2080.51	1242.25	2009.23	1419.35	1522.43	1442.33	964.136	1637.23	1840.45	2108.42	1714.58	1829.98	1703.07	1482.11	1524.26	1736.9	1494.11	2192.56	1810.92	1360.44	2047.73	1625.23	2433.25	1953.59	2546.34	1968.62	1955.56	1760.4	1927.52	1776.11	1784.87	2136.75
1745.98	1640.69	1701.64	1325.79	1243.32	1751.05	1620.56	2022.74	1915.03	2050.02	1901.84	2002.91	1723.67	1975.09	1653.72	1790.46	1897.53	1654.34	2059.9	1215.2	2006.05	1397.85	1496.8	1419.21	963.83	1651.19	1811.3	2107.45	1729.32	1845.58	1714.71	1485.71	1563.35	1720.11	1499.03	2175.74	1793.63	1333.13	2062.74	1641.11	2399.78	1901.51	2545.97	1957.78	1948.31	1761.24	1947.44	1746.78	1775.64	2132.98
1735.93	1642.95	1696.4	1302.01	1226.17	1746.24	1604.22	1990.53	1935.22	2070.83	1902.91	1968.27	1696.27	1974.84	1613.21	1797.3	1864.61	1657.97	2060.82	1206.42	2028.06	1404.58	1471.41	1424.61	944.675	1641.89	1793.69	2107.63	1734.02	1851.31	1706.9	1484.52	1559.12	1711.48	1473.32	2180.05	1806.72	1292.13	2032.42	1645.71	2391.03	1922.34	2515.43	1982.18	1883.2	1774.5	1935.05	1749.86	1776.37	2114.68
1753.17	1636.03	1688.24	1268.63	1229.72	1732.99	1572.08	1947.74	1948.92	2041.94	1913.3	1957.6	1692.84	1980.57	1635.7	1776.01	1864.01	1682.27	2078	1204.62	2009.54	1389.26	1484.92	1416.25	935.442	1656.7	1771.49	2103.49	1746.98	1864.62	1694.24	1488.65	1548.57	1706.86	1442.35	2174.11	1791.89	1301.08	1999.25	1650.21	2361.54	1909.06	2524.48	1988.73	1854.55	1779.7	1893.56	1715.78	1766.79	2104.87
1722.79	1640.38	1674.61	1270.99	1214.58	1694.74	1578.25	1892.9	1964.85	2034.67	1908.49	1942.7	1675.84	1974.46	1590.6	1784.82	1841.61	1691.92	2064.54	1210.8	2017.38	1370.3	1482.42	1401.71	929.675	1640.14	1772.04	2131.58	1755.71	1848.32	1687.82	1487.59	1519.46	1715.48	1442.76	2145.85	1793.98	1295.29	2021.79	1667.12	2353.69	1892.22	2475.43	1977.89	1844.99	1760.24	1859.85	1694.49	1737.41	2080.42
1723	1612.21	1667.69	1269.44	1251.83	1697.25	1571.92	1851.36	1999.97	2030.84	1908.22	1950.94	1666.41	1958.68	1609.64	1752.93	1829.06	1710.6	2060.07	1202.99	2009.91	1359.71	1430.21	1393.71	912.614	1638.61	1755.77	2114.6	1763.38	1857.33	1693.43	1497.67	1540.81	1703.25	1412.69	2160.06	1792.67	1287.52	1987.08	1683.97	2337.83	1849.25	2486.57	1971.94	1802.38	1780.55	1891.68	1709.23	1736.67	2022.39
1706.99	1613.54	1656.31	1252.42	1206.05	1718	1529.24	1857.85	1998.48	2021.22	1903.3	1938.21	1652	1952.37	1609.78	1742.1	1798.8	1712.25	2045.39	1213.98	2001.33	1358.89	1463.62	1396.99	894.978	1635.02	1719.31	2087.13	1756.21	1831.76	1673.32	1464.44	1529.21	1690.11	1420.45	2129.56	1769.29	1273.01	1964.34	1673.63	2335.1	1870.44	2473.74	1981.38	1792.25	1779.66	1841.57	1703.47	1748.5	2047.72
1729.25	1594.37	1661.83	1249.74	1209.92	1686.09	1548.32	1830.82	1994.58	2010.84	1892.34	1930.4	1683.32	1908.59	1594.52	1747.35	1814.89	1734.65	2024.38	1179.48	2000.01	1344.73	1462.82	1403.91	904.559	1638.78	1722.57	2094.85	1753.13	1816.11	1683.31	1484.26	1529.5	1687.54	1436.92	2133.71	1764.31	1256.17	1949.21	1675.22	2311.67	1851.22	2465.51	1966.92	1790.59	1789.3	1816.13	1697.71	1726.49	2014.61
1683.74	1586.83	1660.07	1253.64	1195.15	1696.88	1540.79	1825.99	2020.83	2018.84	1873.3	1909.07	1655.05	1925.57	1590.36	1708.58	1803.37	1739.44	2014.51	1200.13	1989.07	1337.78	1432.34	1426.09	884.021	1604.46	1722.59	2100.3	1752.48	1795.25	1688.98	1473.54	1559.38	1684.09	1435.61	2093.71	1773.55	1257.26	1944.09	1702.41	2314.26	1839.63	2476.59	1968.72	1768.41	1809.48	1803.97	1680.77	1732.23	2017.14
1732.82	1608.09	1643.19	1254.58	1229.04	1667.07	1524.87	1805.5	2011.37	2008.14	1904.75	1895.3	1661.51	1916.74	1585.85	1713.13	1792.26	1760.81	2026.69	1201.23	1958.69	1333.03	1421.53	1386.38	889.693	1632.46	1712.97	2085.26	1725.88	1802.5	1678.75	1466.18	1537.38	1671.3	1431.88	2098.43	1778.77	1255.73	1955.2	1702.92	2290.75	1844.73	2461.82	1945.63	1755.55	1805.53	1807.16	1712.14	1712.12	1965.95
1699.81	1602.76	1623.32	1232.04	1225.29	1660.24	1524.34	1826.56	2010.45	2026.59	1918.25	1906.15	1652.05	1907.81	1612.92	1728.67	1791.43	1753.69	1999.65	1203.51	1969.76	1368.96	1416.39	1402.13	891.327	1611.64	1733.86	2086.68	1757.21	1810.68	1690.5	1458.85	1508.64	1673.7	1434.82	2074.53	1742.74	1268.32	1943.84	1707.28	2296.75	1854.36	2469.76	1973.75	1777.28	1794.36	1797.74	1707.8	1727.49	1977.55
1706.75	1593.14	1640.91	1227.83	1237.17	1661.09	1514.72	1818.49	1987.21	2003.53	1888.49	1915.56	1652.22	1901.31	1618.27	1692.06	1803.51	1764.22	1974.07	1200.18	1957.16	1344.32	1424.34	1396.8	912.167	1632.14	1756.83	2059.46	1756.21	1798.37	1702.12	1469.06	1536.91	1684.25	1421.79	2089.31	1746.85	1248.91	1941.45	1716.68	2299.53	1842.55	2467.76	1967.03	1751.93	1796.76	1794.53	1705.91	1700.02	1972.1
1716.06	1597.45	1618.53	1242.93	1202.77	1664.43	1519.15	1837.8	1996.33	1995.29	1903.98	1886.73	1631.81	1915.19	1589.76	1691.04	1789.14	1780.12	1990.4	1187.13	1977.1	1371.93	1434.89	1382.33	901.932	1615.91	1748.34	2047.56	1765.99	1817.34	1718.54	1491.63	1547.93	1670.2	1436.78	2087.54	1759.19	1236.93	1943.5	1709.65	2295.2	1842.45	2456.2	1975.02	1746.34	1805.04	1829.37	1720.29	1721.82	1974.04
1741.39	1580.51	1629.7	1243.36	1233.92	1661.44	1535.27	1833.57	1993.62	2016.32	1889.52	1857.91	1636.82	1868.2	1589.07	1663.07	1764.72	1794.36	2007.63	1239.28	1941.82	1377.53	1450.28	1372.68	904.554	1623.18	1753.22	2052.84	1781.5	1803.29	1728.03	1493.16	1557.55	1649.75	1432.94	2079.32	1746.04	1246.57	1925.53	1699.61	2299.96	1837.71	2460.34	1985.12	1752.23	1800.97	1810.45	1728.44	1697.46	1999.47
1741.13	1589.23	1626.13	1236.63	1251.81	1649.32	1536.31	1821.48	2015.2	1994.21	1863.13	1890.44	1615.32	1913.35	1583.33	1702.55	1774.93	1792.83	1995.29	1225.21	1952.13	1366.75	1420.86	1407.28	912.668	1610.81	1766.38	2036.69	1781.89	1812.41	1719.67	1479.81	1573.67	1656.74	1439.04	2077.35	1758.38	1258.21	1933.88	1723.34	2301.47	1871.46	2465.41	1967.58	1730.73	1799.44	1827.57	1734.12	1669.6	1933.13
1777.72	1593.94	1630.3	1262.51	1250.04	1663.59	1528.5	1831.99	2005.57	1997.36	1835.14	1915.56	1618.77	1902.3	1579.1	1717.69	1876.95	1823.12	1986.94	1215.87	1957.19	1376.61	1439.08	1393.85	927.74	1627.28	1760.48	2065.27	1783.05	1809.38	1746.7	1485.49	1538.57	1676.06	1434.6	2072.77	1757.61	1244.95	1935.08	1723.38	2325.08	1872.16	2465.08	1975.25	1752.58	1776.66	1841.91	1750.29	1717.19	1991.69
1758.75	1601.43	1609.92	1257.09	1247.18	1670.95	1524.15	1866.72	1994.53	2014.87	1799.95	1918.63	1618.47	1913.22	1570.65	1726.59	1795.99	1804.41	1984.74	1242.68	1950.18	1403.78	1436.32	1375.36	914.093	1634.67	1745.38	2059.55	1771.24	1819.9	1765.07	1501.68	1569.92	1672.04	1442.08	2069.21	1748.09	1267.69	1958.69	1724.6	2322.49	1886.4	2473.71	1946.02	1762.51	1826.44	1865.28	1723.12	1709.72	1966.74
1797.32	1579.33	1601.77	1251.92	1258.03	1842.89	1512.59	1853.23	1993.34	2013.69	1801.72	1889.2	1638.16	1898	1568.27	1755.98	1798.67	1837.95	1970.05	1240.7	1951.13	1379.72	1452.47	1383.6	897.363	1610.06	1738	2044.77	1794.6	1810.47	1770.7	1474.9	1571.27	1697.92	1452.72	2054.15	1776.09	1264.86	1960.05	1726.24	2328	1893.38	2499.59	1915.74	1759.85	1811.82	1865.54	1717.32	1714.39	1980.31
1797.51	1574.1	1609.28	1252.59	1284.1	1660.88	1536.08	1867.71	2010.76	2006.07	1766.18	1913.99	1649.41	1898.58	1564.33	1742.26	1775.56	1823.08	1983.15	1244.44	1932.57	1366.68	1476.74	1373.25	901.203	1639.5	1755.37	2024.07	1806.02	1793.36	1771.06	1495.51	1576.25	1673.46	1447.01	2057.11	1756.87	1264.38	1950.8	1708.9	2360.11	1946.51	2534.8	1927.88	1755.9	1821.73	1854.9	1748.4	1722.74	1966.12
1810.41	1576.38	1628.62	1244.82	1270.84	1690.69	1529.83	1868.47	1997.04	1999.4	1776.78	1893.76	1645.8	1909.49	1572.17	1769.84	1780.64	1826.66	1976.91	1276.73	1942.55	1407.31	1454.62	1388.63	900.538	1629.99	1738.5	2042.95	1797.05	1807.3	1774.3	1487.6	1591.42	1683.55	1458.25	2055.57	1752.42	1272.62	1961.57	1735.86	2382.64	1938.58	2548.51	1897.09	1763.33	1824.58	1860.71	1737.26	1741.11	1994.63
1828.89	1593.38	1610.34	1257.11	1273	1686.06	1526.94	1887.9	1991.89	2034.75	1757.86	1917.58	1641.84	1934.57	1556.27	1768.65	1753.67	1865.9	1979.2	1274.7	1921.67	1389.86	1455.38	1401.37	907.236	1635.51	1723.99	2018.82	1837.53	1805.01	1788.68	1490.52	1615.57	1672.96	1486.03	2051.39	1751.5	1303.82	1946.68	1724.66	2378.69	1958.12	2534.12	1887.27	1760.19	1852.38	1874.33	1752.06	1720.82	1998.75
1821.63	1587.48	1614.67	1247.85	1289.41	1663.03	1555.09	1876.72	1984.93	2009.91	1757.13	1931.4	1657.47	1911.76	1585.68	1810.2	1783.97	1840.77	1962.66	1283.96	1926.15	1403.42	1447.62	1408.44	926.315	1629.63	1726.49	1985.83	1830.04	1822.56	1784.98	1483.51	1599.15	1674.53	1461.48	2044.55	1710.49	1247.18	1958.64	1717.72	2398.73	1977.2	2522.08	1881	1784.04	1822.71	1897.93	1768.11	1727.44	1994.67
1839.08	1571.45	1633.16	1248.57	1279.07	1693.31	1538.84	1853.08	1941.37	2028.08	1750.98	1939.99	1661.1	1960.65	1616.98	1813.85	1747.05	1853.46	1952.09	1290.47	1931.01	1414.23	1423.28	1412.69	929.97	1636.29	1745.95	2003.25	1859.36	1818.36	1780.22	1478.1	1613.64	1702.65	1456.85	2048.16	1713.74	1251.64	1963.67	1711.14	2397.42	1977.06	2556.24	1854.22	1790.02	1833.99	1886.94	1782.94	1740.49	2008.53
1843.4	1573.17	1625.17	1263.09	1280.86	1725.17	1550.97	1878.52	1890.58	2038.14	1743.84	1949.75	1682.05	1937.78	1597.21	1834.62	1765.74	1874.67	1948.88	1303.23	1949.76	1414.81	1465.24	1380.77	920.557	1625.28	1725.43	2025.64	1849.77	1824.03	1765.3	1508.21	1596.91	1693.75	1490.08	2029.59	1758.63	1276.8	1982.16	1723.11	2403.03	1995.5	2567.66	1855.28	1779.11	1824.33	1886.34	1776.72	1742.07	2007.29
1856.29	1593.2	1640.6	1246.62	1303.59	1724.35	1561.39	1857.9	1859.17	2030	1756.56	1957.29	1676.08	1928.77	1606.06	1822.43	1764.03	1868.17	1971.76	1307.6	1931.63	1430.12	1465.67	1394.46	944.595	1641.95	1729.77	2031.57	1868.13	1830.64	1789.87	1508.74	1607.03	1693.34	1479.66	2028.8	1725.14	1284.4	1972.27	1721.66	2431.65	2019.68	2556.01	1850.14	1792.79	1839.97	1897.52	1769.56	1729.1	1984.69
1844.06	1591.81	1636.72	1243.66	1288.06	1714.37	1570.24	1858.62	1867.76	2046.96	1750.92	1955.82	1659.46	1952.77	1609.13	1830.19	1777.03	1906.85	1962.42	1314.89	1948.21	1427.4	1455.59	1419.1	923.421	1618.61	1747.17	2028.66	1862.4	1836.51	1795.03	1519.75	1614.71	1690.29	1479.49	2034.9	1771.9	1272.19	1984.05	1712.47	2451.12	2031.79	2564.57	1876.07	1770.29	1861.72	1903.6	1756.61	1735.54	1990.76
1858.25	1590.29	1623.82	1259.31	1274.29	1727.58	1558.73	1859.6	1871.99	2059.59	1726.29	1970.05	1658.15	1967.77	1648.98	1829.5	1764.09	1904.26	1950.7	1318.04	1957.15	1435.78	1474.04	1411.97	936.778	1612.9	1742.2	2058.38	1862.44	1812.03	1792.21	1526.93	1635.41	1719.07	1462.22	2028.11	1773.77	1274.36	1976.15	1704.83	2424.66	2048.49	2591.82	1890.59	1801.08	1837.03	1934.45	1822.27	1732.81	1995.88
1863.77	1548.24	1633.75	1256.55	1266.35	1725.61	1543.84	1851.14	1851.31	2040.21	1761.24	1966.44	1653.06	1957.66	1615.8	1816.78	1795.03	1887.01	1946.58	1305.05	1943.23	1459.28	1450.06	1416.52	935.793	1608.73	1730.48	2051.89	1877.45	1814.46	1780.05	1505.49	1625.34	1679.35	1462.97	2020.39	1732.9	1278	1959.13	1691.59	2433.98	2022.95	2611.6	1912.98	1769.3	1829.21	1938.8	1757.33	1738.31	2014.1
1869.96	1575.8	1644.22	1239.55	1272.2	1737.09	1566.46	1884.94	1890.97	2070.52	1762.5	1953.52	1671.33	1973.4	1622.65	1860.16	1770.3	1880.65	1961.52	1375.36	1958.3	1438.91	1458.68	1424.5	934.992	1618.81	1716.51	2056.76	1872.85	1829.22	1768.78	1506.41	1606.59	1694.93	1483.85	1983.24	1753.3	1269.51	2008.77	1712.55	2429.91	2036.58	2617.86	1930.78	1794	1848.25	1926.2	1784.76	1723.07	1988.28
1860.31	1579.94	1657.06	1241	1259.53	1761.73	1566.48	1960.71	1866.82	2055.75	1770.23	1985.07	1669.53	1990.47	1644.54	1858.96	1785.8	1899.53	1932.14	1343.56	1926.19	1414.64	1487.03	1424.36	928.034	1616.26	1710.97	2099.38	1860.55	1847.55	1782.11	1508.95	1607.23	1699.16	1493.58	2003.11	1767.07	1270.13	1974.88	1707.57	2444.87	2036.21	2613.07	1971.62	1788	1833.84	1913.13	1793.46	1721.3	2010.7
1845.08	1590.9	1627.63	1239.71	1280.3	1751.76	1567.61	1965.4	1885.05	2072.71	1760.24	2002.22	1665.39	1979.43	1664.31	1872.02	1782.03	1900.33	1941.03	1335.14	1936.34	1427.07	1498.15	1388.14	937.096	1598.56	1713.76	2095.65	1858.43	1838.16	1757.54	1521.11	1617.78	1694.92	1477.27	1997.15	1757.45	1264.14	1985.9	1695.38	2428.31	2030.38	2617.83	1967.98	1778.81	1835.36	1928.4	1776.97	1732.09	2017.46
1856.61	1584.59	1644.85	1245.74	1275.77	1732.19	1572.31	1857.99	1903.47	2066.18	1769.12	1984.55	1653.31	2000.17	1646.76	1883.96	1791.45	1888.03	1944.26	1343.87	1935.18	1436.43	1478.28	1386.09	947.752	1606.51	1713.81	2073.64	1898.39	1850.93	1765.01	1520.01	1624.45	1705.5	1506.31	1983.16	1748.36	1282.37	1977.67	1732.69	2415.46	2047.41	2596.25	1989.68	1809.68	1822.65	1924.92	1809.13	1771.14	2007.03
1837.19	1585.82	1644.39	1245.53	1278.34	1765.17	1577.68	1844.75	1882.65	2095.83	1770.13	2000.34	1659.13	1989.9	1649.4	1917.45	1781.41	1862.85	1936.39	1349.89	1950.76	1412.4	1485.87	1413.37	940.331	1625.32	1707.79	2096.38	1890.79	1832.81	1745.22	1520.73	1630.34	1691.6	1488.23	1956.54	1770.87	1272.75	1992.98	1726.83	2405.84	2041.7	2577.42	2016.94	1815.92	1826.02	1901.14	1800.26	1728.7	2032.82
1835.53	1584.96	1640.57	1260.85	1294.02	1780.31	1592.67	1839.31	1895.36	2064.37	1799.69	1979.26	1656.16	2006.92	1651.16	1854.86	1794.32	1861.84	1917.76	1341.19	1960.22	1461.53	1505.19	1399.3	937.638	1618.63	1748.94	2139.26	1900.89	1842.43	1753.78	1529.51	1624.95	1697.53	1462.98	1962.49	1770.97	1281.67	1965.73	1734.57	2407.93	2048.95	2566.37	2013.83	1807.25	1833.07	1905.03	1819.54	1714.1	2019.03
1810.81	1587.79	1631.26	1267.03	1264.15	1772.87	1593.25	1845	1907.91	2073.89	1828.88	2025.15	1661.17	2010.74	1655.54	1858.19	1799.76	1897.93	1946.67	1353.84	1962.57	1434.49	1484.2	1383.25	962.378	1635.58	1758.81	2123.2	1890.86	1849.3	1743.75	1512.68	1619.93	1693.51	1502.6	1962.46	1787.35	1273.42	2003.07	1733.75	2431	2052.54	2551.44	2033.11	1790.19	1833.85	1907.75	1807.45	1721.4	2024.77
1801.23	1602.19	1664.12	1283.38	1292.7	1743.16	1595.73	1872.74	1942.57	2082	1819.94	2017.12	1667.4	2002.23	1670.48	1878.64	1782.11	1876.13	1959.32	1361.87	1970.83	1439.21	1495.64	1393.84	925.832	1598.45	1744.09	2111.06	1923.27	1836.7	1727.95	1524.76	1612.59	1683.78	1509.5	1970.28	1785.95	1284.49	1997.83	1736.57	2379.28	2065.92	2602.94	2059.28	1812.04	1833.45	1940.87	1814.76	1740.83	2027.62
1797.13	1584.45	1653.76	1264.69	1296.78	1761.14	1596.3	1862.2	1908.11	2081.06	1839.55	1997.73	1669.85	2011.88	1652.91	1883.29	1812.01	1880.27	1980.2	1349.81	1982.2	1483	1504.91	1393.33	953.179	1621.57	1759.87	2133.23	1929.16	1826.08	1715.17	1538.77	1598.93	1716.92	1512.1	1956.42	1792.13	1289.34	2012.98	1749.45	2388.49	2046.94	2595.98	2072.92	1822.69	1856.65	1916.13	1804.4	1727.24	2024.91
1780.21	1584.46	1673.74	1273.38	1319.7	1773.17	1570.4	1866	1934.55	2094.33	1857.1	2014.97	1667.49	2015.7	1644.21	1884.15	1800.19	1893.13	1996.61	1368.91	1993.91	1465.49	1514.7	1379.63	949.4	1603.97	1748.04	2149.96	1916.53	1838.2	1694.96	1521.38	1606.92	1702.44	1508.7	1952.97	1764.46	1288.74	1998.5	1742.57	2374.59	2002.11	2609.51	2072.38	1788.79	1847.13	1923.88	1804.22	1753.42	2022.67
1796.53	1596.8	1654.17	1254.05	1313.27	1739.51	1575.23	1869.48	1953.96	2068.01	1880.97	2022.12	1669.78	2015.84	1669	1886.68	1829.94	1886.38	2005.08	1347.95	1996.41	1446.78	1529.71	1419.28	963.766	1610.85	1771.68	2149.59	1912.15	1811.45	1704.76	1514.92	1616.58	1722.22	1497.08	1962.73	1760.4	1294.44	2013.76	1758.76	2394.97	2033.69	2618.99	2097.22	1812.7	1842.72	1943.57	1831.6	1792.99	2039.61
1794.89	1585.32	1682.82	1274.37	1288.11	1779.03	1572.82	1870.88	1956.97	2075.36	1882.52	2050.59	1679.68	2036.54	1657.74	1872.73	1821.06	1889.71	2015.15	1327.95	1997.92	1466.93	1518.13	1410.43	922.924	1602.18	1736.43	2158.51	1925.92	1820.33	1708.26	1526.19	1612	1710.25	1496.53	1982.62	1750.44	1273.3	1998.95	1766.69	2372.16	2011.44	2616.62	2092.3	1844.76	1830.48	1948.83	1819.95	1749.7	2047.34
1783.3	1580.27	1680.95	1269.1	1316.39	1759.51	1586.07	1860.02	1980.42	2072.76	1899.83	2055.76	1690.78	2049.39	1654.11	1892.05	1837.26	1866.9	2038.13	1353.42	1994.67	1459.12	1502.56	1406.31	946.763	1617.91	1762.92	2133.46	1924.04	1809.05	1695.08	1528.36	1649.63	1722.51	1502.36	1965.25	1742.32	1281	2012.58	1757.84	2386.45	1982.59	2623.17	2099.45	1826.94	1845.51	1977.92	1819.4	1780.28	2004.28
1773.94	1601.09	1707.62	1279.63	1321.76	1764.69	1605.4	1845.43	1993.33	2101.85	1905.91	2039.97	1666.68	2044.84	1675.3	1901.01	1806.56	1888.87	2059.96	1360.3	2043.86	1482.15	1528.16	1402.9	943.585	1631.9	1770.23	2162.79	1918.66	1804.59	1696.71	1525.69	1636.62	1747.23	1510.06	1977.98	1764.04	1277.52	2026.12	1761.09	2398.97	1986.63	2630.62	2134.33	1847.87	1845.79	1955.51	1827.3	1796.41	2025.08
1788.05	1575.98	1740.28	1260.94	1302.72	1747	1605.94	1892.67	1969.42	2094.14	1895.42	2034.15	1689.21	2016.35	1652.21	1886.78	1871.73	1879.58	2083.79	1368.07	2034.52	1447.27	1521.13	1401.07	944.169	1621.2	1784.92	2162.29	1953.72	1804.92	1690.17	1510.21	1639.23	1712.81	1522.11	1960.91	1768.88	1312.61	1984.18	1750.03	2376.71	1995.82	2620.73	2137.92	1818.24	1849.49	1970.43	1853.61	1816.66	2028.65
1780.7	1593.91	1733.79	1282.46	1326.42	1758.82	1576.59	1887.58	1923.23	2097.56	1891.04	2064.48	1686.76	2032.55	1663.47	1884.31	1805.76	1879.62	2074.97	1339.79	2067.72	1464.46	1526.96	1393.91	966.377	1624.83	1766.6	2157.52	1921.08	1782.7	1690.16	1515.5	1641.05	1734.41	1521.81	1967.52	1776	1290.29	2020.77	1745.18	2375.42	1986.54	2648.15	2152.92	1845.24	1841.9	1939.73	1830.62	1779.07	2011.95
1800.72	1577.72	1747.35	1292.06	1319.33	1743.31	1589.95	1880.14	1894.85	2090.6	1896.41	2055.36	1713.57	2056.8	1684.15	1865.97	1804.04	1879.55	2077.89	1345.39	2067.25	1508.83	1508.16	1391.14	965.182	1633.26	1781.31	2169.8	1918.33	1803.07	1705.08	1528.68	1660.26	1714.72	1515.01	1958.81	1778.4	1298.04	2010.46	1754.74	2375.62	2005.42	2638.7	2169.25	1833.5	1860.95	1955.38	1871.24	1803.38	2048.98
1775.52	1562.46	1774.47	1274.22	1294.78	1738.93	1599.75	1909.7	1913.8	2119.34	1896.83	2040.64	1704.03	2062.92	1697.7	1824.25	1819.5	1892.27	2094.39	1358.39	2068.18	1485.21	1506.9	1371.69	961.368	1637.78	1776.29	2173.96	1933.54	1794.51	1704.21	1508.38	1636.36	1737.32	1506.45	1953.71	1805.62	1308.42	2032.01	1770.03	2366.64	2016.52	2654.09	2146.83	1841.42	1864.39	1963.9	1854.48	1804.31	2056.61
1790.64	1584.19	1768.49	1276.85	1314.67	1740.79	1596.7	1878.26	1915.06	2111.65	1872.86	2052.65	1680.53	2059.41	1684.48	1903.55	1846.38	1915.51	2087.01	1380.97	2079.13	1469.04	1512.42	1376.29	978.451	1634.69	1774.44	2161.42	1919.84	1783.17	1666.75	1503.66	1651.39	1745.79	1516.27	1960.94	1803.73	1283.47	2058.06	1775.14	2377.83	2036.3	2646.38	2158.19	1824	1834.85	1937.04	1844.02	1782.14	2057.86
1773.74	1569.34	1771.24	1300.46	1324.97	1735.25	1597.67	1898.93	1910.7	2133.56	1882.05	2067.99	1688.21	2062.29	1703.25	1872.27	1859.63	1896.35	2117.04	1366.79	2064.87	1476.73	1520.39	1401.25	975.078	1642.61	1758.55	2175.45	1941.86	1773.07	1714.67	1502.98	1631.23	1745.94	1507.33	1939.34	1779.06	1303.43	2055.48	1787.23	2376.96	1989.88	2660.29	2143.64	1866.35	1850.29	1979.64	1831.8	1787.7	2089.63
1783.35	1575.41	1795.59	1285.88	1323.16	1771.04	1594.39	1917.39	1915.75	2147.49	1877.28	2061.21	1688.7	2072.81	1718.78	1883.45	1816.15	1903.04	2117.53	1346.88	2056.2	1509.77	1531.47	1384.09	976.638	1621.17	1773.83	2148.09	1921.23	1791.59	1721.35	1487.77	1647.78	1738.96	1513.14	1957.2	1814.31	1283.96	2046.36	1784.94	2395.6	1988.91	2607.41	2162.8	1866.13	1848.4	1954.61	1854.84	1797.49	2034.84
1785.86	1582.74	1790.95	1290.61	1330.66	1774.44	1608.05	1902.35	1947.09	2120.67	1858.98	2067.96	1674.59	2088.74	1705.73	1893.92	1844.08	1903.72	2133.5	1384.46	2080.14	1480.91	1545.53	1364.77	946.283	1623.52	1770.67	2157.91	1926.73	1823.16	1707.72	1503.65	1647.82	1735.9	1519.98	1931.57	1794.14	1326.56	2027.36	1791.07	2382.12	2023.96	2660.01	2163.38	1857	1861.69	1967.01	1837.95	1800.18	2060.17
1785.01	1577.59	1815.22	1282.78	1326.32	1746.92	1582.36	1911.54	1956.11	2133.42	1848.12	2100.54	1684.7	2078.49	1713.54	1896.42	1854.81	1888.69	2134.06	1381.04	2064.03	1521.61	1522.69	1364.02	965.525	1636.92	1771.41	2207.07	1926.82	1839.55	1687.66	1523.9	1651.63	1760.41	1507.9	1937.18	1798.43	1322.43	2054.69	1797.32	2393.83	2013.92	2614.48	2166.42	1848.74	1850.97	1973.08	1847.97	1810.99	2061.96
1788.08	1605.9	1807.28	1282.75	1338.65	1758.44	1598.58	1916.84	1971.43	2141.11	1874.98	2068.81	1688.22	2065.2	1713.54	1888.13	1853.37	1922.4	2155.11	1392.51	2061.79	1486.16	1548.45	1365.52	958.141	1629.89	1760.23	2202.85	1941.64	1838.15	1698.56	1490.09	1656.46	1717.84	1515.01	1926.31	1793.48	1326.91	2042.52	1792.99	2400.27	2011.12	2636.46	2170.55	1836.55	1865.03	1966.6	1855.59	1816	2059.05
1779.54	1572.43	1833.71	1296.24	1335.24	1743.6	1595.2	1915.16	1975.82	2166.39	1854.07	2064.79	1690.64	2066.17	1720.71	1855.92	1848.52	1911.27	2142.84	1384.97	2080.34	1512.44	1551.74	1416.23	949.721	1621.43	1770.13	2208.6	1947.58	1844.47	1719.66	1486.77	1667.18	1735.71	1518.63	1940.87	1802.54	1302.42	2033.27	1764.45	2424.63	2034.16	2638.97	2179.89	1875.59	1882.86	1956.49	1875.58	1840.93	2057.88
1768.84	1583.65	1842.95	1289.54	1330.06	1721.45	1588.43	1898.57	1950.99	2137.37	1862.05	2097.03	1703.01	2066.27	1705.26	1885.2	1861.25	1913.66	2167.09	1404.88	2095.03	1494.57	1519.01	1383.63	959.732	1644.46	1761.32	2219	1927.47	1835.6	1711.87	1496.21	1662.78	1790.63	1535.7	1947.83	1776.43	1313.47	2016.48	1752.53	2448.68	2009.77	2643.64	2185.6	1882.18	1856.89	1974.26	1863.12	1827.72	2076.62
1783.25	1609.72	1843.79	1282.33	1327.91	1754.94	1604.84	1893.95	1953.2	2145.54	1884.78	2084.43	1692.86	2087.2	1683.34	1897.84	1850.32	1894.93	2189.9	1393.61	2081.63	1502.77	1535.81	1368.78	964.791	1652.08	1786.25	2198.32	1924.82	1833.77	1718.29	1473.95	1653.9	1787.75	1539.12	1933.12	1792.25	1335.69	2027.46	1795.27	2439.59	2022.84	2631.02	2209.22	1859.22	1873.63	1975.3	1871.46	1836.56	2058.07
1777.09	1588.15	1838.94	1284.34	1358.32	1734.13	1616.09	1913.74	1981.49	2148.11	1870.96	2067.75	1686.76	2090.33	1709.01	1890.43	1888.26	1899.95	2164.11	1387.28	2103.06	1503.02	1528.92	1381.3	971.709	1660.58	1810.89	2235.9	1923.61	1834.12	1719.79	1482.61	1670.77	1775.07	1502.77	1949.25	1805.72	1331.12	2067.21	1811.79	2413.94	2030.4	2670.89	2210.37	1875.5	1878.02	1988.12	1875.24	1835.22	2085.36
1770.01	1612.54	1855.73	1299.09	1329.2	1742.67	1619.9	1918.91	1957.66	2165.76	1890.5	2093.18	1715.13	2109.7	1721.81	1862.83	1884.71	1893.21	2177.09	1378.03	2088.99	1507.86	1500.25	1392.95	961.175	1643.55	1779.69	2223.91	1941.91	1828.84	1715.69	1492.71	1656.94	1779.02	1529.45	1962.55	1798.4	1328.55	2057.65	1802.07	2418.25	2026.79	2663.06	2203.61	1866.4	1890.18	1963.03	1865.04	1849.2	2083.49
[truncated: 156 more columns]
