# Supplementary material for: A mechano-osmotic feedback couples cell volume to the rate of cell deformation
Source: eLife journal article supplement (doi:10.7554/elife.72381), 2022-04-13
Supplement: supp [file M_V_D_exp3.xlsx]

## Sheet: V
1	1	1	1	1	2	2	2	2	2	2	2	2	2	3	3	3	4	4	5	5	5	5	5	5		1	1	1	1	1	2	2	2	2	2	2	2	2	2	3	3	3	4	4	5	5	5	5	5
1	2	3	4	5	1	2	3	4	5	6	7	8	9	1	2	3	1	2	1	2	3	4	5	6		1	2	3	4	5	1	2	3	4	5	6	7	8	9	1	2	3	1	2	1	2	3	4	5
3228.46	2260.87	2206.9	1694.1	1840.75	1764.74	1325.58	1424.47	2077	2190.89	1904.92	1830.04	1204.14	2163.75	1919.17	2087.02	1972.69	1671.92	1563.45	2482.25	1693.27	2829.62	3063.6	2492.06	2494.55		100	100	100	100	100	100	100	100	100	100	100	100	100	100	100	100	100	100	100	100	100	100	100	100
3211.38	2257.57	2172.07	1718.06	1829.6	1734.15	1310.06	1409.66	2072.95	2206.23	1873.79	1807.99	1217.03	2135.68	1902.62	2058.01	1950.98	1676.26	1569.21	2485.37	1661.07	2795.68	3069.92	2445.1	2497.9		99.471	99.8541	98.4218	101.414	99.394	98.2667	98.8289	98.9604	99.8046	100.7	98.3658	98.7953	101.071	98.7026	99.1374	98.61	98.8994	100.26	100.368	100.125	98.0985	98.8003	100.206	98.1153
3210.09	2235.17	2143.44	1714.06	1814.06	1739.72	1305.46	1390.4	2066.17	2182.95	1875.02	1798.64	1192.57	2123.99	1887.65	2074.34	1948.58	1654.78	1537.94	2433.61	1667.64	2785.02	3076.08	2413.07	2497.61		99.4311	98.8634	97.1243	101.178	98.5499	98.5823	98.4822	97.6081	99.4785	99.6374	98.43	98.2843	99.0396	98.1625	98.3573	99.3925	98.7779	98.9749	98.3684	98.0403	98.4862	98.4236	100.407	96.8303
3224.57	2215.4	2120.43	1715.95	1802.11	1731.33	1304.57	1381.85	2035.21	2160.34	1866.15	1784.85	1195.99	2104.21	1853.1	2065.56	1933.43	1667.53	1526.35	2429.8	1649.38	2770.17	3038.84	2397.38	2502.99		99.8797	97.989	96.0815	101.289	97.9007	98.1065	98.4147	97.0074	97.988	98.6054	97.9645	97.5309	99.3237	97.2482	96.5575	98.9718	98.0099	99.7375	97.6269	97.8869	97.4078	97.8989	99.1917	96.2007
3215.52	2215.43	2115.17	1740.25	1786.63	1704.21	1294.48	1393.92	2040.43	2151.87	1846.86	1768.1	1188.59	2112.55	1850.16	2072.16	1919.76	1670.28	1532.61	2416.16	1628.17	2770.36	3039.58	2407.9	2499.44		99.5992	97.9903	95.8436	102.724	97.0598	96.5698	97.6536	97.8551	98.239	98.2188	96.9517	96.6152	98.7087	97.6339	96.4042	99.2877	97.3169	99.9023	98.0273	97.3373	96.1555	97.9057	99.2157	96.6226
3222.45	2203.86	2094.29	1757.73	1782.46	1715.66	1313.07	1369.06	2036.63	2132.66	1846.74	1784.84	1182.39	2128.75	1865.44	2083	1902.53	1662.97	1495.67	2384.23	1631.45	2782.15	3052.02	2403.96	2486.72		99.814	97.4784	94.8975	103.756	96.8332	97.2188	99.0565	96.1101	98.0563	97.3423	96.9457	97.5304	98.1939	98.3826	97.2004	99.8074	96.4436	99.465	95.6648	96.0509	96.3489	98.3223	99.622	96.4645
3237.48	2183.38	2070.53	1782.67	1777.32	1710.37	1301.81	1369.81	2031.53	2145.2	1826.82	1765.23	1192.76	2127.54	1835.6	2118.23	1888.77	1663.42	1496.99	2375.36	1609.41	2768	3043.32	2421.69	2514.41		100.279	96.5727	93.8207	105.228	96.5538	96.9192	98.2071	96.1628	97.8107	97.9146	95.8999	96.4588	99.0555	98.3264	95.6453	101.495	95.7461	99.4919	95.7495	95.6938	95.0476	97.8223	99.338	97.176
3247.54	2191.5	2070.31	1791.63	1747.42	1711.85	1322.53	1341.08	2025.98	2138.75	1835.05	1766.35	1186.69	2140.74	1823.66	2130.68	1876.64	1675.03	1494.85	2366.53	1603.82	2790.77	3037.94	2409.85	2528.77		100.591	96.9316	93.8105	105.757	94.9299	97.0026	99.7702	94.1458	97.5431	97.6203	96.3319	96.5197	98.5511	98.9365	95.0233	102.092	95.1312	100.186	95.612	95.3379	94.7176	98.6271	99.1622	96.7009
3270.7	2189.98	2040.54	1800.92	1737.56	1715.43	1314.6	1339.18	2039.2	2183.69	1833.9	1769.76	1193.21	2158.01	1855.68	2127.89	1872.11	1693.65	1473.41	2371.93	1600.39	2784.77	3038.62	2426.09	2551.71		101.308	96.8646	92.4616	106.305	94.3937	97.2056	99.1717	94.0121	98.1799	99.6714	96.2714	96.7061	99.0922	99.7349	96.6916	101.958	94.9015	101.3	94.2413	95.5555	94.5148	98.4148	99.1847	97.3525
3245.68	2180.36	2051.56	1806.49	1753.13	1719.58	1322.88	1339.2	2053.33	2202.22	1825.2	1773.33	1199.39	2164.24	1865.68	2161.45	1861.94	1701.78	1468.07	2406.75	1586.83	2789.59	3027.38	2450.27	2582.22		100.533	96.4388	92.9612	106.634	95.24	97.4407	99.7966	94.0137	98.8601	100.517	95.8146	96.9012	99.6062	100.023	97.2127	103.566	94.3856	101.786	93.8997	96.9583	93.7138	98.5854	98.8177	98.3231
3247.78	2164.31	2042.23	1821.68	1751.01	1729.57	1359.75	1337.12	2064.2	2195.55	1822.19	1782.84	1189.3	2169.74	1881.68	2154.86	1870.95	1727.7	1461.19	2403.82	1571.56	2797.05	3037.7	2454.34	2603.63		100.599	95.7293	92.5382	107.53	95.1244	98.0069	102.578	93.8678	99.3836	100.213	95.6567	97.4207	98.7676	100.277	98.0462	103.251	94.8426	103.336	93.4593	96.84	92.8119	98.8489	99.1545	98.4861
3246.72	2173.82	2028.29	1814.15	1745.8	1724.31	1372.25	1328.61	2074.82	2223.3	1818.03	1789	1179.65	2191.13	1892.35	2179.08	1863.48	1735.33	1451.79	2394.06	1567.62	2805.34	3023.26	2463.99	2615.74		100.566	96.1496	91.9068	107.086	94.8416	97.7087	103.521	93.2701	99.895	101.479	95.4385	97.7576	97.9666	101.265	98.6025	104.411	94.4637	103.793	92.8584	96.447	92.5795	99.1419	98.683	98.8734
3234.28	2147.98	2016.97	1849.41	1740.75	1713.33	1385.56	1317.92	2057.74	2239.83	1823.15	1805.95	1192.31	2204.87	1892.47	2208.92	1869.11	1740.17	1454.82	2420.53	1545.38	2812.75	3023.8	2493.28	2652.79		100.18	95.0069	91.3938	109.167	94.5674	97.0866	104.525	92.5196	99.0723	102.234	95.7072	98.6839	99.018	101.9	98.6087	105.841	94.7492	104.082	93.0522	97.5133	91.266	99.4038	98.7008	100.049
3225.1	2172.24	2013.3	1837.64	1750.83	1708.35	1409.18	1328.15	2074.48	2235.51	1827.64	1808.76	1212.12	2212.28	1906.07	2219.92	1863.23	1752.6	1454.63	2424.88	1553.45	2864.93	3020.14	2486.94	2678.65		99.896	96.08	91.2276	108.472	95.115	96.8042	106.307	93.2377	99.8783	102.037	95.9428	98.8371	100.663	102.243	99.3175	106.368	94.4511	104.826	93.0395	97.6886	91.7426	101.248	98.5814	99.7944
3232.78	2192.34	2001.58	1852.89	1743.1	1720.81	1422.24	1317.47	2086.71	2236.04	1845.76	1799.45	1197.11	2205	1898.37	2224.39	1844.4	1768.25	1454.4	2432.68	1528.39	2874.91	3028.94	2489.18	2680.9		100.134	96.9689	90.6965	109.373	94.6948	97.5108	107.292	92.4883	100.468	102.061	96.8941	98.3288	99.4165	101.906	98.9161	106.582	93.4966	105.762	93.0251	98.0028	90.2625	101.601	98.8685	99.8841
3209.13	2214.25	1987.11	1841.56	1736.42	1704.79	1445.85	1325.32	2082.17	2247.35	1840.39	1798.95	1210.02	2197.44	1915.52	2255.55	1846.2	1777.13	1466.38	2477.58	1526.96	2884.19	3044.59	2503.71	2726.28		99.4012	97.9382	90.0407	108.704	94.3319	96.6028	109.073	93.0394	100.249	102.577	96.612	98.3012	100.489	101.557	99.8098	108.075	93.5881	106.293	93.7912	99.8118	90.1785	101.928	99.3794	100.467
3215.26	2235.13	1996.19	1844.5	1742.11	1711.06	1433.16	1312.17	2119.99	2233.04	1851.43	1829.66	1210.35	2198.99	1922.82	2256.64	1834.61	1777.75	1462.47	2467.85	1518.15	2921.84	3038.24	2509.17	2735.96		99.5911	98.8616	90.452	108.878	94.6412	96.9579	108.115	92.1164	102.07	101.924	97.1916	99.9794	100.516	101.629	100.19	108.127	93.0004	106.33	93.5409	99.4197	89.658	103.259	99.1722	100.687
3200.45	2242.91	1985.58	1844.12	1744.58	1715.98	1469.33	1325.55	2087.91	2219.71	1848.54	1790.43	1222.32	2206.39	1933.97	2256.6	1844.34	1791.12	1452.95	2479.85	1504.49	2921.66	3056.31	2526.4	2765.33		99.1326	99.2056	89.9715	108.855	94.7755	97.2366	110.844	93.0551	100.525	101.315	97.0402	97.8358	101.51	101.971	100.771	108.125	93.4935	107.13	92.9323	99.903	88.851	103.253	99.762	101.378
3223.69	2244.8	1996.23	1857.61	1754.11	1700.49	1470.76	1313.86	2094.38	2214.91	1858.01	1794.83	1202.2	2198.83	1924.28	2274.9	1848.19	1806.4	1450.44	2502.78	1500.55	2941.9	3049.29	2519.71	2780.81		99.8522	99.2895	90.454	109.651	95.2932	96.3592	110.952	92.235	100.837	101.096	97.537	98.0758	99.8389	101.621	100.266	109.002	93.6887	108.043	92.7715	100.827	88.6187	103.968	99.5329	101.109
3197.31	2264.17	1990.04	1839.18	1742.55	1724.19	1488.68	1306.73	2075.61	2196.24	1864.38	1792.67	1217.38	2161.11	1916.47	2274.89	1839.26	1799.08	1445.24	2481.96	1502.78	2938.37	3049.66	2532.86	2813.2		99.0352	100.146	90.1732	108.563	94.6653	97.702	112.304	91.7344	99.9327	100.244	97.8714	97.9578	101.1	99.8779	99.859	109.002	93.236	107.606	92.4394	99.9882	88.7505	103.843	99.545	101.637
3196.07	2270.17	1996	1843.19	1727.74	1714.96	1483.9	1315.95	2065.46	2174.19	1864.21	1797.4	1223.25	2147.06	1936.62	2266.78	1823.93	1780.79	1460.93	2466.91	1497.93	2969.85	3062.61	2531.9	2823.97		98.9967	100.412	90.4435	108.8	93.8607	97.1791	111.943	92.3812	99.444	99.2379	97.8628	98.2165	101.587	99.2288	100.909	108.613	92.459	106.512	93.4424	99.3818	88.4638	104.956	99.9675	101.598
3190.53	2288.4	2010.55	1853.5	1736.94	1702.79	1521.17	1306.03	2080.32	2183.36	1867.82	1791.66	1228.74	2146.76	1920.04	2282.4	1849.06	1769.6	1466.01	2462.7	1492.84	2974.83	3070.38	2563.02	2840.2		98.8252	101.218	91.103	109.409	94.3605	96.4894	114.755	91.685	100.16	99.6563	98.0524	97.903	102.044	99.2149	100.045	109.361	93.7329	105.843	93.7676	99.2122	88.1632	105.132	100.221	102.847
3213.3	2260.65	2010.08	1815.61	1742.58	1716.67	1535.88	1315.95	2096.18	2196.91	1868.99	1802.26	1250.03	2142.62	1930.56	2291.76	1849.26	1749.54	1449.98	2503.77	1488.13	2954.93	3073.07	2580.95	2841.75		99.5305	99.9905	91.0813	107.172	94.6667	97.2758	115.865	92.3812	100.923	100.275	98.1138	98.4823	103.812	99.0234	100.593	109.81	93.7431	104.643	92.7426	100.867	87.8852	104.429	100.309	103.567
3161.88	2273.37	2001.17	1783.82	1729.05	1709.11	1526.74	1306.33	2100.06	2196.04	1866.64	1804.38	1250.19	2149.63	1933.22	2292.28	1835.2	1748.81	1460.53	2476.31	1500.75	2968.21	3076.34	2613.02	2858.57		97.9379	100.553	90.6779	105.296	93.9316	96.8473	115.175	91.7058	101.11	100.235	97.9902	98.5978	103.824	99.3475	100.732	109.835	93.0302	104.599	93.417	99.7605	88.6305	104.898	100.416	104.853
3101.68	2256.43	1994.31	1763.93	1739.82	1725.77	1547.85	1299.37	2096.18	2195.91	1868.81	1805.09	1232.91	2149.35	1933.86	2299.25	1852.33	1746.07	1444.72	2475.6	1520.19	2991.02	3069.2	2643.19	2851.44		96.0731	99.8035	90.3671	104.122	94.5166	97.7918	116.768	91.2175	100.923	100.229	98.104	98.6369	102.39	99.3344	100.765	110.169	93.8987	104.435	92.4057	99.7321	89.7784	105.704	100.183	106.064
3083.04	2250.68	2003.04	1768.27	1753.13	1691.57	1552.41	1310.18	2099.79	2231.31	1880.47	1812.5	1257.58	2146.94	1925.49	2324.15	1850.4	1729.68	1463.9	2432.38	1538.11	2997.74	3101.49	2677.16	2844.87		95.4956	99.5493	90.7626	104.378	95.2399	95.8535	117.112	91.9766	101.097	101.845	98.7162	99.0414	104.438	99.2233	100.329	111.362	93.8006	103.455	93.6327	97.9909	90.837	105.941	101.237	107.427
3057.22	2229.08	1997.69	1766.95	1740.26	1691.13	1555.26	1308.15	2124.19	2215.02	1890.77	1793.03	1239.64	2135.47	1953.97	2314.22	1849.73	1737.93	1464.83	2443.3	1555.44	2984.3	3095.73	2704.52	2838.94		94.696	98.5942	90.52	104.3	94.5409	95.829	117.327	91.8336	102.272	101.101	99.2568	97.9776	102.948	98.6928	101.813	110.886	93.7669	103.948	93.6919	98.4305	91.86	105.467	101.049	108.525
3062.5	2204.34	1999.52	1753.07	1772.31	1697.73	1562.22	1310.66	2103.71	2256.96	1886.76	1767.68	1241.29	2129.29	1953.22	2286.27	1880.5	1735.66	1461.4	2435.56	1577.03	2999.12	3085.21	2728.19	2837.01		94.8596	97.4996	90.6032	103.481	96.282	96.2029	117.852	92.0104	101.286	103.016	99.0466	96.5926	103.085	98.4074	101.774	109.547	95.3266	103.813	93.4727	98.1188	93.1351	105.99	100.705	109.475
3090.09	2202.2	2010.75	1764.7	1785.2	1692.91	1556.59	1320.05	2087.95	2252.29	1899.83	1776.76	1255.57	2145.64	1940.16	2269.76	1894.2	1740.57	1477.04	2419.76	1585.11	3004.5	3094.68	2742.8	2806.74		95.7141	97.405	91.112	104.167	96.9818	95.9297	117.427	92.6696	100.527	102.802	99.7327	97.0886	104.272	99.1631	101.093	108.756	96.0212	104.106	94.4732	97.4822	93.6124	106.18	101.014	110.061
3123.94	2162.83	2020.75	1770.37	1789.29	1710.42	1562.47	1298.8	2101.69	2269.69	1911.96	1773.75	1235.15	2153.74	1951.17	2288.64	1874.82	1758.16	1483.82	2392.46	1597.8	3002.13	3097.79	2771.44	2803.37		96.7627	95.6638	91.5648	104.502	97.2043	96.9216	117.871	91.1777	101.188	103.597	100.369	96.9243	102.576	99.5374	101.667	109.661	95.0389	105.158	94.9068	96.3826	94.3617	106.097	101.116	111.211
3126.32	2130.71	2019.18	1756.74	1810.12	1692.75	1577.27	1324.6	2087.6	2287.4	1907.2	1771.17	1256.88	2162.48	1969.12	2275.46	1909.31	1738.3	1500	2405.47	1615.37	3023.46	3108.37	2786.43	2803.66		96.8364	94.2431	91.4939	103.697	98.336	95.9207	118.987	92.9886	100.51	104.405	100.119	96.7833	104.381	99.9416	102.603	109.029	96.7871	103.97	95.942	96.9067	95.3996	106.85	101.461	111.812
3149.3	2126.55	1998.37	1747.25	1827.67	1699.88	1581.52	1326.41	2117.69	2290.82	1925.91	1805.04	1257.58	2186.98	1965.43	2293.24	1936.52	1745.64	1521.58	2405.21	1649.81	3003.01	3127.46	2802.96	2797.24		97.5482	94.0591	90.5509	103.137	99.2895	96.3247	119.308	93.1159	101.959	104.561	101.102	98.6341	104.438	101.074	102.41	109.881	98.1663	104.409	97.3219	96.8961	97.4337	106.128	102.084	112.475
3177.56	2136.08	2012.65	1761.02	1820.86	1683.4	1575.79	1337.64	2088.49	2304.85	1902.14	1797.04	1270.58	2186.81	1988.91	2277.05	1948.56	1755.62	1545.87	2398.15	1656.84	3004.63	3128.6	2849.18	2780.99		98.4233	94.4803	91.198	103.95	98.9193	95.3908	118.876	93.904	100.553	105.202	99.8538	98.1966	105.518	101.066	103.634	109.105	98.7769	105.007	98.8753	96.6116	97.8489	106.185	102.121	114.33
3207.97	2144.07	2011.81	1771.37	1827.07	1705.84	1587.33	1374.68	2090.37	2306.53	1912.89	1791.16	1268.28	2190.75	1969.09	2270.65	1989.25	1757.91	1553.97	2401.8	1631.75	2995.14	3136.95	2850.11	2786.98		99.3655	94.8341	91.1598	104.561	99.2565	96.662	119.746	96.5041	100.644	105.278	100.418	97.8755	105.327	101.248	102.601	108.799	100.839	105.144	99.394	96.759	96.367	105.849	102.394	114.367
3213.26	2153.73	2020.93	1777.86	1842.1	1705.14	1582.03	1387.35	2105.74	2315.57	1927.42	1796.06	1270.11	2209.55	1976.75	2292.08	1999.41	1747.3	1590.87	2440.36	1674.36	2943.57	3169.83	3122.56	2788.11		99.5294	95.2611	91.573	104.944	100.073	96.6228	119.346	97.3938	101.384	105.691	101.181	98.1431	105.479	102.117	103	109.825	101.355	104.509	101.754	98.3121	98.8834	104.027	103.467	125.3
3236.76	2169.35	2033.02	1786.8	1839.7	1707.78	1565.46	1371.31	2109.37	2349.84	1961.74	1811.41	1274.84	2223.99	1980.24	2283.52	2014.19	1750.05	1593.12	2438.75	1703.27	2933.88	3201.23	2931.98	2788.86		100.257	95.9519	92.1209	105.472	99.9428	96.7723	118.096	96.2678	101.559	107.255	102.982	98.982	105.872	102.784	103.182	109.415	102.104	104.673	101.898	98.2475	100.591	103.684	104.492	117.653
3257.88	2150.56	2018.03	1786.58	1849.78	1704.59	1573.69	1381.06	2103.76	2320.24	1971.34	1801.46	1258.68	2219.86	1997.78	2274.87	2038.73	1749.29	1615.82	2430.45	1678.16	2932.1	3232.72	2930.8	2774.46		100.911	95.121	91.4418	105.459	100.491	96.5915	118.717	96.9522	101.288	105.904	103.486	98.4382	104.53	102.593	104.096	109.001	103.348	104.628	103.35	97.913	99.1074	103.622	105.52	117.606
3263.22	2167.36	2027	1793.48	1844.55	1729.8	1563.61	1408.76	2114.91	2329.33	1984.02	1809.85	1271.86	2230.56	1988.26	2283.53	2057.65	1782.2	1637.33	2436.28	1716.3	2959.07	3281.59	2936.69	2782.75		101.077	95.8642	91.8482	105.866	100.206	98.0202	117.957	98.8971	101.825	106.319	104.152	98.897	105.625	103.088	103.6	109.416	104.307	106.596	104.726	98.1478	101.36	104.575	107.115	117.842
3285.18	2172.24	2044.88	1793.31	1837.57	1728.38	1554.59	1422.67	2106.17	2325.73	2011.36	1809.92	1291.44	2228.04	1987.06	2291.53	2081.37	1784.83	1613.37	2428.46	1732.2	2955.27	3321.49	2953.12	2791.13		101.757	96.08	92.6582	105.856	99.8268	97.9393	117.276	99.8731	101.404	106.155	105.588	98.9007	107.25	102.971	103.537	109.799	105.509	106.754	103.193	97.833	102.299	104.44	108.418	118.501
3308.06	2192.29	2041.62	1769.41	1848.03	1756.25	1562.1	1431.93	2124.05	2338.11	2016.3	1822.1	1294.91	2230	1997.69	2306.33	2080.86	1780.26	1641.3	2440.29	1738.98	2967.04	3367.29	2955.55	2783.78		102.466	96.9668	92.5108	104.445	100.395	99.519	117.843	100.523	102.265	106.72	105.847	99.5664	107.538	103.062	104.091	110.508	105.483	106.48	104.98	98.3095	102.699	104.856	109.913	118.599
3303.27	2180.3	2061.22	1784.59	1849.41	1756	1569.32	1440.79	2111.31	2330.41	2010.8	1847.78	1290.6	2230.18	2011.93	2301.81	2085.51	1796.99	1661.89	2466.44	1745.62	2970.87	3366.89	2970.73	2782.93		102.317	96.4366	93.3988	105.341	100.47	99.5046	118.387	101.146	101.652	106.368	105.558	100.969	107.18	103.07	104.833	110.292	105.719	107.481	106.296	99.3627	103.092	104.992	109.9	119.208
3321.42	2179.64	2063.52	1781.79	1852.73	1792.2	1569.66	1440.96	2118.82	2323.89	2020.47	1839.56	1308.8	2244.57	2008.99	2319.86	2089.26	1781.32	1673.49	2466	1737.98	2992.96	3401.26	2969.82	2785.22		102.879	96.4072	93.5029	105.176	100.651	101.556	118.413	101.157	102.013	106.071	106.066	100.52	108.692	103.735	104.68	111.157	105.909	106.544	107.038	99.3453	102.641	105.772	111.022	119.171
3363.6	2173.47	2060.08	1793.77	1877.68	1799.19	1556.3	1450.54	2135.88	2325.68	2035.77	1841.35	1294.73	2207.87	2022.04	2311.77	2120.55	1783	1680.57	2450.87	1763.45	2980.71	3411.06	2964.92	2787.24		104.186	96.1343	93.3472	105.883	102.006	101.952	117.405	101.83	102.835	106.152	106.869	100.618	107.524	102.039	105.36	110.769	107.495	106.644	107.491	98.7356	104.144	105.339	111.342	118.975
3355.63	2166.45	2055.59	1821.81	1876.07	1804.95	1592.82	1462.4	2130.86	2301.87	2059.94	1870.64	1302.61	2235.98	2010.82	2330.62	2129.97	1785.88	1690.9	2452.23	1756.09	2965.64	3404.45	2962.59	2802.62		103.939	95.8238	93.1436	107.538	101.918	102.278	120.16	102.662	102.593	105.066	108.137	102.219	108.178	103.338	104.775	111.672	107.973	106.816	108.152	98.7906	103.71	104.807	111.126	118.881
3351.85	2158.38	2065.51	1822.05	1873.71	1825.82	1579.35	1496.85	2142.16	2318.23	2052.2	1859.3	1293.5	2225.59	2028.06	2307.13	2138.59	1775.05	1700.55	2436	1741.42	2969.83	3431.4	2954.23	2795.13		103.822	95.4668	93.5933	107.552	101.79	103.461	119.144	105.081	103.137	105.812	107.731	101.599	107.421	102.858	105.674	110.547	108.41	106.169	108.769	98.1367	102.843	104.955	112.005	118.546
3368.83	2171.1	2081.67	1839.43	1873.04	1859.28	1578.28	1497.98	2146.64	2312.29	2051.29	1858.9	1317.5	2245.36	2041.35	2330.31	2135.54	1783.54	1695.95	2455.04	1784.49	2980.49	3424.75	2930.82	2800.71		104.348	96.0296	94.3253	108.578	101.754	105.357	119.063	105.16	103.353	105.541	107.684	101.577	109.414	103.772	106.366	111.657	108.255	106.677	108.475	98.9038	105.387	105.332	111.788	117.606
3375.95	2183.06	2100.01	1854.6	1880.37	1851.14	1576.53	1496.76	2128.98	2289.87	2066.76	1853.44	1309.12	2215.79	2054.59	2332.77	2169.92	1792.42	1685.03	2467.41	1775.82	2998.13	3454.17	2940.63	2812.16		104.569	96.5587	95.1566	109.474	102.152	104.896	118.932	105.075	102.503	104.518	108.496	101.278	108.718	102.405	107.056	111.775	109.998	107.207	107.776	99.402	104.875	105.955	112.749	118
3371.75	2187.4	2080.11	1849.85	1873.76	1857.38	1592.18	1519.54	2150	2304.77	2075.34	1860.06	1320.66	2246.71	2051.7	2339.01	2169.63	1805.75	1698.92	2470.31	1803.38	3008.83	3465.28	2930.58	2829.94		104.439	96.7506	94.2546	109.194	101.793	105.249	120.112	106.674	103.515	105.198	108.946	101.64	109.677	103.834	106.906	112.074	109.983	108.005	108.665	99.5187	106.503	106.333	113.111	117.596
3366.21	2192.87	2076.94	1865.24	1851.82	1884.09	1601.26	1494.56	2148.9	2284.09	2070.68	1862.04	1307.46	2245.69	2042.94	2350.85	2156.49	1789.84	1733.14	2446.54	1785.65	3010.38	3443.88	2938.51	2841.39		104.267	96.9922	94.1112	110.102	100.601	106.763	120.797	104.92	103.461	104.254	108.701	101.748	108.581	103.787	106.449	112.642	109.317	107.053	110.853	98.5614	105.456	106.388	112.413	117.915
3362.73	2202.09	2112.35	1856.28	1860.2	1876.29	1593.65	1523.17	2126.95	2325.95	2094.6	1860.13	1323.2	2253.72	2057.38	2363.8	2177.89	1790.15	1712.48	2475.93	1800.04	3012.86	3480.64	2946.68	2844.29		104.159	97.4003	95.7158	109.573	101.057	106.321	120.223	106.929	102.405	106.165	109.957	101.644	109.888	104.158	107.202	113.262	110.402	107.072	109.532	99.7452	106.306	106.476	113.613	118.243
3360.25	2219.84	2106.22	1883.03	1844.54	1891.56	1590.06	1537.09	2122.41	2306.97	2086.21	1859.59	1324.76	2233.04	2076.04	2370.5	2193.33	1796.54	1729.75	2462.3	1801.37	3020.55	3457	2929.74	2848.89		104.082	98.1853	95.438	111.152	100.206	107.186	119.952	107.906	102.186	105.298	109.517	101.615	110.018	103.202	108.174	113.583	111.185	107.454	110.637	99.1959	106.384	106.747	112.841	117.563
3362.14	2208.59	2131.34	1864.2	1853.23	1904.64	1574.44	1532.19	2167.87	2312.8	2096.25	1851.45	1342.11	2272.1	2075.5	2388.96	2194.09	1814.39	1716.69	2466.56	1818.12	3021.08	3446.14	2936.55	2851.81		104.141	97.6877	96.5759	110.04	100.678	107.927	118.774	107.562	104.375	105.564	110.044	101.17	111.458	105.007	108.146	114.468	111.223	108.522	109.801	99.3679	107.373	106.766	112.487	117.836
3384.45	2188.08	2139.27	1866.21	1841.76	1918.26	1594.23	1525.76	2163.66	2289.49	2102.89	1863.52	1326.08	2258.97	2090.02	2349.87	2194.66	1810.61	1718.26	2488.52	1830	3021.37	3461.66	2945.14	2873.72		104.832	96.7806	96.9355	110.159	100.055	108.699	120.266	107.111	104.172	104.5	110.392	101.829	110.127	104.401	108.902	112.595	111.252	108.295	109.902	100.252	108.075	106.777	112.993	118.181
3378.25	2199.9	2134.75	1868.68	1853.11	1889.91	1588.69	1525.2	2116.99	2289.49	2117.77	1872.16	1334.75	2283.99	2109.17	2384.65	2192.38	1818.39	1707.61	2493.37	1812.9	3052.17	3444.33	2929.29	2858.13		104.64	97.3034	96.7306	110.305	100.671	107.092	119.849	107.071	101.925	104.501	111.174	102.301	110.847	105.557	109.9	114.261	111.136	108.761	109.22	100.448	107.065	107.865	112.427	117.545
3383.92	2180.98	2132.18	1870.48	1859.33	1911.12	1593.41	1519.26	2162.2	2285.49	2106.34	1873.03	1326.38	2287.05	2095.9	2380.71	2201.6	1788.31	1714.04	2493.59	1833.65	3053.66	3470.98	2936.89	2878.06		104.815	96.4665	96.6139	110.411	101.009	108.295	120.205	106.654	104.102	104.318	110.573	102.349	110.152	105.698	109.209	114.072	111.604	106.962	109.632	100.457	108.29	107.918	113.297	117.85
3372.66	2188.15	2145.04	1862.12	1842.13	1894.31	1610.19	1523.5	2129.39	2318.15	2115.07	1881.73	1335.51	2293.31	2108.61	2380.22	2157.05	1819.4	1709.86	2520.17	1845.97	3024.57	3454.78	2930.76	2864.02		104.466	96.7838	97.1969	109.918	100.075	107.342	121.47	106.952	102.522	105.809	111.031	102.825	110.911	105.988	109.871	114.049	109.346	108.821	109.365	101.528	109.018	106.89	112.768	117.604
3403.12	2202.89	2188.37	1880.04	1853.62	1898.45	1620.4	1502.91	2163.12	2300.22	2092.77	1902.83	1314.67	2295.74	2120.55	2404.42	2177.44	1807.3	1700.62	2499.18	1846.36	3053.63	3439.14	2926.96	2897.15		105.41	97.4356	99.1602	110.975	100.699	107.577	122.24	105.506	104.146	104.99	109.861	103.977	109.18	106.1	110.493	115.208	110.379	108.097	108.773	100.682	109.041	107.917	112.258	117.451
3432.71	2184.67	2213.01	1888.35	1855.52	1914.2	1605.71	1512.51	2172.84	2312.5	2118.05	1876.36	1308.46	2300.98	2114.51	2398.61	2173.1	1811.7	1697.04	2525.51	1844.61	3058.53	3475.96	2931.62	2865.54		106.327	96.6297	100.277	111.466	100.802	108.469	121.132	106.181	104.614	105.551	111.188	102.531	108.664	106.342	110.178	114.93	110.159	108.361	108.544	101.742	108.938	108.09	113.46	117.638
3422	2206.49	2250.11	1881.17	1835.11	1894.39	1604.5	1501.93	2152.95	2336.64	2114.34	1895	1302.84	2316.01	2120.67	2392.63	2183.79	1818.2	1678.71	2503.94	1855.52	3055.34	3451.93	2919.14	2891.37		105.995	97.5948	101.958	111.042	99.6933	107.347	121.041	105.438	103.657	106.653	110.994	103.549	108.197	107.037	110.499	114.643	110.701	108.75	107.372	100.874	109.582	107.977	112.675	117.137
3423.69	2199.36	2260.44	1872.19	1823.32	1903.74	1608.21	1504.35	2185.17	2313.72	2127.43	1887.66	1325.08	2330.71	2124.3	2415.33	2163.4	1820.86	1674.09	2519.27	1849.13	3063.68	3426.52	2917.97	2900.62		106.047	97.2795	102.426	110.512	99.0529	107.876	121.321	105.608	105.208	105.607	111.68	103.149	110.044	107.716	110.689	115.731	109.667	108.908	107.077	101.491	109.205	108.272	111.846	117.091
3448.15	2199.06	2277.59	1891.83	1835.28	1913.02	1605.76	1500.71	2167.98	2319.74	2093.46	1907.91	1317.73	2307.13	2142.17	2422.81	2145.68	1827.96	1667.97	2498.6	1886.3	3073.78	3452.51	2930.37	2920.25		106.805	97.2661	103.203	111.671	99.7025	108.402	121.137	105.352	104.38	105.881	109.897	104.255	109.434	106.626	111.62	116.089	108.769	109.333	106.685	100.658	111.4	108.629	112.694	117.588
[truncated: 3 more columns]

## Sheet: M
1	1	1	1	1	2	2	2	2	2	2	2	2	2	3	3	3	4	4	5	5	5	5	5	5		1	1	1	1	1	2	2	2	2	2	2	2	2	2	3	3	3	4	4	5	5	5	5	5
1	2	3	4	5	1	2	3	4	5	6	7	8	9	1	2	3	1	2	1	2	3	4	5	6		1	2	3	4	5	1	2	3	4	5	6	7	8	9	1	2	3	1	2	1	2	3	4	5
482.554	355.248	320.736	295.411	307.385	347.428	257.933	267.319	326.39	369.488	328.134	292.423	229.086	359.38	320.37	355.037	286.791	254.257	242.206	424.849	263.698	460.516	468.814	392.615	430.27		100	100	100	100	100	100	100	100	100	100	100	100	100	100	100	100	100	100	100	100	100	100	100	100
483.043	358.347	329.789	298.299	313.194	364.934	255.667	273.362	337.72	370.033	327.301	303.997	229.653	359.691	324.635	359.591	295.255	251.857	243.015	424.727	267.808	443.844	478.411	398.868	440.056		100.101	100.872	102.823	100.978	101.89	105.039	99.1215	102.26	103.471	100.147	99.7461	103.958	100.247	100.087	101.331	101.283	102.951	99.0564	100.334	99.9712	101.559	96.3796	102.047	101.593
489.819	358.003	327.279	293.689	315.5	362.146	272.484	277.394	333.799	373.754	332.122	301.998	222.477	359.525	327.234	351.86	300.331	251.824	236.751	424.627	269.485	447.021	472.702	394.336	441.422		101.505	100.775	102.04	99.4172	102.64	104.236	105.641	103.769	102.27	101.154	101.215	103.274	97.115	100.04	102.143	99.1052	104.721	99.0433	97.7475	99.9477	102.195	97.0694	100.829	100.439
478.766	363.468	321.181	296.744	316.979	349.661	264.687	290.968	333.455	381.063	339.053	309.295	235.262	365.045	329.767	358.647	294.722	256.678	234.807	432.758	266.775	468.847	476.334	401.09	445.643		99.2151	102.314	100.139	100.451	103.121	100.643	102.618	108.847	102.164	103.133	103.328	105.77	102.696	101.576	102.933	101.017	102.765	100.952	96.945	101.862	101.167	101.809	101.604	102.159
483.587	364.968	322.758	297.999	314.878	349.183	252.013	288.368	348.672	382.407	351.238	310.295	218.567	375.264	334.599	358.708	303.797	257.356	240.527	434.957	271.629	476.167	472.524	401.179	451.719		100.214	102.736	100.63	100.876	102.438	100.505	97.7047	107.874	106.827	103.496	107.041	106.112	95.4083	104.42	104.441	101.034	105.93	101.219	99.3068	102.379	103.008	103.399	100.791	102.181
487.504	366.7	333.11	308.94	321.255	347.417	268.141	285.925	347.517	379.841	342.819	307.607	219.423	370.866	330.278	356.242	298.388	255.789	241.405	418.529	271.218	481.132	468.392	397.002	440.156		101.026	103.224	103.858	104.58	104.512	99.9968	103.958	106.96	106.473	102.802	104.475	105.193	95.7816	103.196	103.093	100.339	104.044	100.603	99.6691	98.5123	102.852	104.477	99.91	101.118
482.583	369.255	332.777	295.711	325.422	349.195	269.763	287.802	343.207	377.353	348.639	303.397	219.689	375.831	326.346	352.354	301.687	257.822	242.682	428.493	268.541	484.831	471.629	392.715	437.923		100.006	103.943	103.754	100.102	105.868	100.508	104.586	107.662	105.152	102.128	106.249	103.753	95.898	104.577	101.865	99.2443	105.194	101.402	100.197	100.858	101.837	105.28	100.601	100.025
482.15	369.4	336.92	303.564	325.652	327.968	271.44	291.99	348.872	385.606	344.107	318.104	235.407	370.415	315.338	347.367	302.886	270.807	241.405	433.369	272.962	479.033	472.318	396.18	437.035		99.9162	103.983	105.046	102.76	105.943	94.3986	105.237	109.229	106.888	104.362	104.868	108.782	102.759	103.07	98.4294	97.8395	105.612	106.509	99.6691	102.005	103.513	104.021	100.747	100.908
479.473	365.356	336.787	298.688	324.932	337.787	265.42	285.158	352.394	379.685	355.559	308.718	232.108	374.341	319.87	350.388	302.564	266.564	243.482	433.547	269.585	468.67	476.339	394.858	442.7		99.3615	102.845	105.004	101.109	105.708	97.2249	102.903	106.673	107.967	102.76	108.358	105.572	101.319	104.163	99.844	98.6905	105.5	104.841	100.527	102.047	102.233	101.77	101.605	100.571
476.496	376.042	346.44	307.318	336.687	361.535	263.903	286.258	351.149	386.139	353.438	314.305	230.886	375.018	339.375	347.933	299.765	268.108	242.271	437.235	271.374	461.116	475.572	391.448	449.609		98.7446	105.853	108.014	104.031	109.533	104.06	102.315	107.085	107.586	104.506	107.711	107.483	100.785	104.351	105.932	97.9991	104.524	105.448	100.027	102.915	102.911	100.13	101.442	99.7029
488.17	369.288	345.884	305.93	331.289	356.614	262.432	280.16	332.777	387.161	343.785	311.639	222.899	376.161	329.167	345.378	302.575	270.252	239.117	426.227	263.276	462.705	464.087	392.259	443.799		101.164	103.952	107.841	103.561	107.777	102.644	101.744	104.803	101.957	104.783	104.77	106.571	97.2993	104.669	102.746	97.2795	105.504	106.291	98.7244	100.324	99.8399	100.475	98.9917	99.9095
493.902	365.756	345.251	305.319	325.391	333.433	263.987	286.058	330.122	380.43	353.016	310.451	224.665	375.875	335.743	344.49	298.621	268.586	241.916	427.071	258.844	460.983	473.484	386.394	439.201		102.352	102.958	107.643	103.354	105.858	95.9716	102.347	107.01	101.143	102.961	107.583	106.165	98.0702	104.59	104.799	97.0292	104.125	105.636	99.8801	100.523	98.1592	100.101	100.996	98.4157
493.047	358.514	341.919	307.618	327.934	357.592	258.211	288.824	345.218	380.918	341.863	302.264	224.21	379.53	336.132	338.714	297.954	270.985	244.337	432.48	265.498	463.949	471.707	384.217	433.869		102.174	100.919	106.604	104.132	106.685	102.925	100.108	108.045	105.768	103.093	104.184	103.365	97.8714	105.607	104.92	95.4024	103.892	106.579	100.88	101.796	100.682	100.745	100.617	97.8611
491.358	363.779	341.941	308.162	328.379	357.814	252.99	270.174	349.317	374.609	344.929	305.286	230.897	371.354	332.066	338.858	298.377	265.586	244.848	425.449	263.976	466.204	473.629	389.097	445.454		101.824	102.401	106.611	104.317	106.83	102.989	98.0836	101.068	107.024	101.386	105.118	104.399	100.79	103.332	103.651	95.443	104.04	104.456	101.091	100.141	100.105	101.235	101.027	99.104
480.873	356.148	337.509	304.564	319.648	361.58	261.047	267.564	349.539	366.867	340.02	309.862	228.775	359.98	322.525	342.013	299.065	271.129	244.015	413.42	258.411	473.413	467.064	395.328	459.006		99.6515	100.253	105.229	103.098	103.989	104.073	101.207	100.091	107.092	99.2905	103.622	105.964	99.8642	100.167	100.673	96.3315	104.28	106.636	100.747	97.3097	97.9949	102.8	99.6267	100.691
511.03	364.634	337.953	304.952	318.682	365.201	259.236	280.704	338.82	375.742	348.595	304.752	226.554	354.571	331.689	353.265	297.066	265.731	241.027	420.662	268.486	478.811	462.976	388.975	441.037		105.901	102.642	105.368	103.23	103.675	105.115	100.505	105.007	103.808	101.693	106.235	104.216	98.8945	98.6617	103.533	99.5008	103.583	104.513	99.5132	99.0143	101.816	103.973	98.7548	99.0729
505.909	361.202	337.254	300.354	317.204	364.29	260.78	280.238	337.431	374.454	338.887	301.631	227.887	349.994	332.884	347.356	299.798	271.34	243.604	418.796	265.442	469.147	471.518	391.318	435.157		104.84	101.676	105.15	101.673	103.194	104.853	101.104	104.833	103.383	101.344	103.277	103.149	99.4763	97.3883	103.906	97.8364	104.535	106.719	100.577	98.5751	100.661	101.874	100.577	99.6698
508.486	367.111	337.654	300.898	318.459	354.471	263.435	280.915	341.797	375.509	345.529	310.851	231.119	352.771	335.505	350.421	298.543	268.041	247.714	424.316	257.878	466.159	468.997	385.654	445.954		105.374	103.339	105.274	101.857	103.603	102.027	102.133	105.086	104.72	101.629	105.301	106.302	100.887	98.161	104.724	98.6999	104.098	105.422	102.274	99.8745	97.7928	101.225	100.039	98.227
496.012	365.279	338.431	297.688	325.579	354.093	260.969	286.636	346.262	372.976	344.885	307.751	229.653	351.405	338.716	351.788	301.165	264.953	242.571	427.315	264.709	473.923	469.919	380.766	449.542		102.789	102.823	105.517	100.771	105.919	101.918	101.177	107.226	106.088	100.944	105.105	105.242	100.247	97.7808	105.726	99.0847	105.012	104.207	100.151	100.58	100.383	102.911	100.236	96.9821
497.123	362.302	338.953	290.601	321.736	352.505	261.88	288.757	346.717	376.72	346.518	302.586	229.575	358.547	338.249	352.188	300.506	264.254	242.849	420.64	268.13	472.113	467.853	381.066	439.434		103.019	101.985	105.68	98.3719	104.669	101.461	101.53	108.02	106.228	101.957	105.602	103.476	100.213	99.7682	105.581	99.1974	104.782	103.932	100.265	99.0091	101.681	102.518	99.7949	97.0585
493.491	365.618	345.351	293.267	326.401	352.56	253.538	287.602	346.529	375.52	345.451	297.832	228.509	362.713	341.07	351.199	310.284	261.677	237.75	417.896	264.531	471.735	465.32	384.976	435.357		102.266	102.919	107.674	99.2743	106.187	101.477	98.2959	107.587	106.17	101.632	105.277	101.85	99.7479	100.927	106.461	98.9189	108.192	102.918	98.1603	98.3633	100.316	102.436	99.2547	98.0544
490.236	370.495	344.907	285.114	322.869	341.075	257.759	292.889	338.476	383.951	341.297	294.056	228.909	359.458	336.894	360.411	314.76	260.434	239.217	424.997	262.265	472.402	471.407	380.133	436.49		101.592	104.292	107.536	96.5144	105.037	98.1712	99.9324	109.565	103.703	103.914	104.011	100.558	99.9224	100.022	105.158	101.513	109.753	102.43	98.7657	100.035	99.4566	102.581	100.553	96.8209
481.006	368.14	335.91	291.856	316.504	356.87	260.713	282.292	338.042	377.63	338.564	293.1	231.241	363.001	339.782	359.366	306.071	261.143	243.96	417.544	260.666	467.037	465.542	396.584	434.835		99.6791	103.629	104.731	98.7968	102.967	102.718	101.078	105.601	103.57	102.204	103.179	100.232	100.941	101.008	106.059	101.219	106.723	102.709	100.724	98.2804	98.85	101.416	99.3021	101.011
482.05	366.152	340.575	290.268	322.869	353.882	256.348	286.936	333.844	385.761	351.772	296.555	230.775	364.623	336.638	360.588	312.939	253.823	240.55	426.622	261.088	462.782	461.877	397.095	438.19		99.8955	103.069	106.185	98.2591	105.037	101.858	99.3855	107.338	102.284	104.404	107.204	101.413	100.737	101.459	105.078	101.564	109.117	99.8296	99.316	100.417	99.0101	100.492	98.5202	101.141
483.105	365.341	339.364	296.788	323.824	347.317	258.148	282.437	335.588	375.364	349.728	287.224	229.142	361.591	335.028	356.667	308.599	250.113	244.171	429.221	262.909	468.703	464.765	387.664	437.968		100.114	102.841	105.808	100.466	105.348	99.968	100.083	105.655	102.818	101.59	106.581	98.2223	100.024	100.615	104.575	100.459	107.604	98.3705	100.811	101.029	99.7009	101.778	99.1363	98.739
490.048	360.964	335.643	293.478	315.96	349.328	258.547	288.435	331.611	379.463	352.86	287.18	225.343	360.88	331.562	357.189	303.397	252.402	244.482	423.723	261.032	464.715	465.875	386.831	442.278		101.553	101.609	104.648	99.3457	102.79	100.547	100.238	107.899	101.6	102.7	107.535	98.2071	98.366	100.417	103.494	100.606	105.79	99.2704	100.939	99.7349	98.989	100.912	99.3732	98.5269
488.737	359.376	337.343	292.045	325.602	349.805	258.57	285.314	332.455	385.639	347.506	289.157	226.043	361.213	331.64	353.89	301.587	244.737	243.093	423.956	263.543	462.105	466.853	384.92	443.877		101.281	101.162	105.177	98.8607	105.926	100.684	100.247	106.731	101.858	104.371	105.904	98.8832	98.6715	100.51	103.518	99.677	105.159	96.256	100.366	99.7898	99.941	100.345	99.5817	98.0402
490.381	353.111	332.1	302.842	317.993	346.273	262.613	295	330.567	380.641	343.474	289.013	225.687	356.926	330.174	354.646	305.063	245.537	241.494	416.481	266.531	467.47	464.398	393.796	442.311		101.622	99.3984	103.543	102.516	103.451	99.6675	101.814	110.355	101.28	103.018	104.675	98.8339	98.5163	99.3169	103.06	99.8897	106.371	96.5706	99.7058	98.0302	101.074	101.51	99.0581	100.301
492.325	351.845	328.256	298.277	318.37	348.239	259.958	289.768	327.623	383.173	355.715	284.503	221.155	359.18	327.919	355.179	302.164	245.115	245.481	416.803	268.252	462.794	462.465	395.817	435.546		102.025	99.042	102.345	100.97	103.574	100.233	100.785	108.398	100.378	103.704	108.405	97.2917	96.538	99.9444	102.356	100.04	105.36	96.4045	101.352	98.1061	101.727	100.494	98.6458	100.816
488.404	346.902	330.045	305.93	310.851	358.636	259.458	290.646	334.177	385.195	344.974	287.869	221.955	363.768	326.686	353.957	296.955	247.814	241.594	415.592	267.886	455.518	461.866	400.327	439.323		101.212	97.6506	102.902	103.561	101.127	103.226	100.591	108.726	102.386	104.251	105.132	98.4426	96.8871	101.221	101.971	99.6958	103.544	97.4661	99.7471	97.8211	101.588	98.9146	98.5179	101.964
495.29	355.244	333.799	303.919	312.917	358.669	264.312	293.978	329.789	385.195	348.495	286.402	223.177	363.424	324.953	354.235	296.455	247.37	244.759	415.87	266.686	457.306	464.923	394.206	445.299		102.639	99.9988	104.073	102.88	101.8	103.236	102.473	109.973	101.041	104.251	106.205	97.9412	97.4205	101.125	101.431	99.774	103.37	97.2914	101.054	97.8864	101.133	99.3029	99.1702	100.405
490.714	361.386	331.766	304.008	308.451	350.105	260.414	291.79	332.144	384.062	352.982	290.923	225.41	360.536	321.598	350.391	292.378	247.292	242.016	412.715	268.13	465.759	463.024	395.384	444.91		101.691	101.728	103.439	102.91	100.347	100.771	100.962	109.154	101.763	103.944	107.573	99.4872	98.3951	100.321	100.383	98.6915	101.948	97.2608	99.9213	97.1439	101.681	101.138	98.765	100.705
488.215	359.043	332.266	311.328	310.795	342.541	261.669	297.366	327.512	379.219	352.149	289.146	225.832	355.115	319.355	348.037	296.433	243.193	247.192	420.002	264.798	465.259	465.579	392.774	441.522		101.173	101.068	103.595	105.388	101.109	98.5933	101.448	111.24	100.344	102.633	107.319	98.8794	98.5793	98.8131	99.6831	98.0282	103.362	95.6488	102.058	98.859	100.417	101.03	99.3099	100.04
489.015	359.842	331.255	307.318	310.684	350.905	257.181	296.655	328.434	379.53	347.562	288.902	224.343	362.957	318.355	350.714	295.033	244.682	245.648	418.047	266.12	462.638	473.688	403.304	441.911		101.339	101.293	103.28	104.031	101.073	101.001	99.7085	110.974	100.626	102.718	105.921	98.7959	97.9296	100.995	99.3711	98.7822	102.874	96.2342	101.421	98.3989	100.918	100.461	101.04	102.723
491.725	358.176	330.111	308.44	316.193	348.095	253.627	289.768	322.825	377.164	354.171	288.99	223.377	358.469	317.755	347.681	304.797	246.737	245.581	415.926	267.975	459.694	480.274	396.428	439.756		101.9	100.824	102.923	104.411	102.866	100.192	98.3304	108.398	98.9076	102.077	107.935	98.8263	97.5078	99.7466	99.1838	97.9281	106.278	97.0424	101.393	97.8995	101.622	99.8215	102.445	100.971
488.004	359.12	330.745	310.995	307.951	342.341	254.649	294.5	328.001	375.198	351.549	290.668	219.378	360.735	319.588	346.537	296.31	254.304	240.849	417.425	268.541	462.227	477.209	398.916	435.391		101.129	101.09	103.12	105.275	100.184	98.5357	98.7266	110.168	100.493	101.545	107.136	99.3998	95.7622	100.377	99.7559	97.6058	103.319	100.019	99.4398	98.2525	101.837	100.371	101.791	101.605
491.036	356.321	328.145	314.15	307.74	339.564	255.515	288.724	329.267	369.144	345.329	289.002	216.135	362.868	319.855	356.567	301.065	252.827	244.082	415.059	267.453	466.448	483.696	394.884	440.156		101.758	100.302	102.31	106.343	100.116	97.7364	99.0625	108.007	100.881	99.9068	105.24	98.8301	94.3464	100.971	99.8391	100.431	104.977	99.4378	100.774	97.6956	101.424	101.288	103.174	100.578
496.523	352.145	324.38	311.361	307.041	342.852	256.104	285.214	328.301	371.688	342.674	288.746	216.79	364.134	322.822	350.58	298.421	252.405	239.283	416.47	269.119	464.271	479.675	396.25	428.637		102.895	99.1264	101.136	105.4	99.888	98.6828	99.2907	106.694	100.585	100.595	104.431	98.7427	94.6325	101.323	100.765	98.7447	104.055	99.2717	98.7932	98.0276	102.056	100.815	102.317	100.926
492.147	357.221	330.556	314.538	304.475	340.908	254.682	292.434	327.868	367.9	342.119	293.945	216.857	358.092	325.499	358.426	294.955	252.56	246.496	415.226	269.818	460.839	471.621	402.115	426.196		101.988	100.555	103.061	106.475	99.0532	98.1233	98.7395	109.395	100.453	99.5701	104.262	100.52	94.6616	99.6415	101.601	100.954	102.847	99.3329	101.771	97.7348	102.321	100.07	100.599	102.42
490.703	356.832	328.045	316.171	311.132	338.453	253.427	293.167	329.856	377.619	341.663	296.533	218.301	358.392	325.432	352.346	302.131	250.517	246.484	417.247	270.929	461.794	473.71	405.319	422.528		101.689	100.446	102.279	107.028	101.219	97.4167	98.2529	109.669	101.062	102.201	104.123	101.405	95.2919	99.7249	101.58	99.2421	105.349	98.5291	101.766	98.2106	102.742	100.277	101.044	103.236
493.935	353.078	326.801	316.926	310.01	348.661	256.559	285.081	327.023	375.076	338.209	289.457	217.479	358.88	325.443	350.125	295.777	252.205	249.428	425.078	272.84	457.973	478.431	391.797	426.733		102.359	99.389	101.891	107.283	100.854	100.355	99.4673	106.644	100.194	101.512	103.07	98.9858	94.9331	99.8609	101.584	98.6164	103.133	99.1931	102.982	100.054	103.467	99.4476	102.051	99.7917
485.282	350.468	327.368	314.927	313.434	349.128	254.582	285.947	329.889	373.309	338.242	292.512	218.279	360.547	321.156	354.901	296.91	254.638	247.562	427.366	268.263	459.906	471.188	379.312	438.334		100.565	98.6543	102.068	106.607	101.968	100.489	98.7008	106.968	101.072	101.034	103.08	100.03	95.2822	100.325	100.245	99.9617	103.528	100.15	102.211	100.592	101.731	99.8673	100.506	96.6117
494.791	350.412	323.369	315.194	313.956	343.63	253.105	283.603	329.223	372.31	338.875	296.255	219.134	360.18	322.255	356.467	298.143	251.028	248.639	427.222	270.785	458.617	471.122	349.532	428.004		102.536	98.6386	100.821	106.697	102.138	98.9066	98.128	106.092	100.868	100.764	103.273	101.31	95.6555	100.223	100.589	100.403	103.958	98.73	102.656	100.558	102.687	99.5875	100.492	89.0266
501.766	350.079	325.868	316.893	312.512	348.006	253.96	282.204	329.967	374.254	336.998	294.311	219.6	357.392	324.699	357.056	290.957	250.272	247.517	426.278	270.063	454.263	474.343	381.3	435.691		103.981	98.5448	101.6	107.272	101.668	100.166	98.4596	105.568	101.096	101.29	102.701	100.646	95.8592	99.4467	101.351	100.569	101.452	98.4329	102.193	100.336	102.414	98.642	101.179	97.1181
503.399	359.754	330.145	316.538	309.447	341.475	251.994	279.882	328.612	375.242	335.832	296.733	219.745	357.27	321.867	356.501	302.064	245.962	250.106	428.499	268.697	456.384	473.921	378.045	448.736		104.32	101.268	102.933	107.152	100.671	98.2863	97.6974	104.7	100.681	101.557	102.346	101.474	95.9222	99.4127	100.467	100.412	105.326	96.7379	103.261	100.859	101.896	99.1027	101.089	96.2891
509.264	358.602	327.179	312.75	307.869	340.897	251.161	282.826	327.923	375.098	336.021	296.755	218.401	356.57	321.689	361.236	300.054	249.484	251.05	426.911	268.997	451.852	476.32	380.708	430.903		105.535	100.944	102.009	105.87	100.158	98.1201	97.3744	105.801	100.47	101.518	102.403	101.481	95.3355	99.218	100.412	101.746	104.625	98.1228	103.651	100.485	102.009	98.1186	101.601	96.9674
504.377	361.712	332.933	314.838	302.649	340.377	255.271	289.479	330.211	372.81	330.878	296.122	214.28	358.781	322.1	358.037	299.991	251.039	250.605	421.668	272.784	460.709	477.286	365.216	434.269		104.522	101.819	103.803	106.576	98.4592	97.9703	98.9678	108.29	101.171	100.899	100.836	101.265	93.5367	99.8331	100.54	100.845	104.602	98.7344	103.468	99.2512	103.446	100.042	101.807	93.0214
510.475	358.48	328.856	311.484	304.159	341.81	255.16	288.979	325.746	374.187	330.678	294.167	217.001	352.238	322.255	356.604	298.469	255.448	251.239	423.812	268.563	455.899	476.864	380.034	437.212		105.786	100.91	102.532	105.441	98.9506	98.3827	98.9247	108.103	99.8026	101.272	100.775	100.596	94.7246	98.0126	100.589	100.441	104.072	100.469	103.729	99.7558	101.845	98.9973	101.717	96.7957
509.308	359.124	335.476	312.061	302.227	335.032	254.46	291.734	326.39	368.744	332.566	292.745	220.067	354.993	324.899	355.404	305.033	252.694	244.552	421.49	264.453	461.131	483.285	379.051	443.623		105.544	101.091	104.596	105.636	98.3218	96.432	98.6534	109.133	100	99.7986	101.351	100.11	96.0628	98.7791	101.414	100.103	106.361	99.3853	100.968	99.2094	100.286	100.133	103.087	96.5452
506.043	359.624	329.301	313.972	310.972	340.823	253.693	288.08	326.846	375.164	336.245	299.232	214.757	353.86	322.922	355.993	302.545	251.783	243.619	427.955	267.997	459.731	480.074	365.908	437.846		104.868	101.232	102.67	106.283	101.167	98.0987	98.3562	107.766	100.14	101.536	102.472	102.328	93.7452	98.4639	100.797	100.269	105.493	99.0271	100.583	100.731	101.63	99.8295	102.402	93.1977
507.409	362.601	330.789	311.872	310.405	343.788	251.305	287.846	323.491	375.209	338.901	301.587	217.834	353.56	323.344	354.127	305.933	249.284	245.118	426.278	275.028	454.777	474.643	382	435.368		105.151	102.07	103.134	105.572	100.983	98.9523	97.4304	107.679	99.1118	101.548	103.281	103.134	95.0882	98.3804	100.928	99.7436	106.675	98.0441	101.202	100.336	104.297	98.7537	101.243	97.2965
515.695	356.336	326.624	310.451	312.105	345.556	247.551	290.746	330.922	374.342	343.758	299.854	218.223	353.804	318.19	350.761	304.656	251.65	248.417	425.467	272.984	454.177	473.154	377.346	436.613		106.868	100.306	101.835	105.091	101.535	99.4611	95.9748	108.763	101.389	101.314	104.761	102.541	95.258	98.4484	99.3196	98.7957	106.229	98.9747	102.564	100.145	103.521	98.6235	100.926	96.1109
507.453	358.657	327.834	307.74	307.451	348.255	246.895	280.249	326.324	370.699	345.668	295.366	215.179	351.719	317.057	349.739	303.445	253.471	246.551	426.278	269.496	455.077	470.033	392.208	436.79		105.16	100.96	102.213	104.174	100.021	100.238	95.7207	104.837	99.9796	100.328	105.344	101.007	93.9294	97.8683	98.9659	98.5078	105.807	99.6911	101.794	100.336	102.199	98.8188	100.26	99.8963
513.196	358.824	333.377	310.362	306.029	345.712	254.882	279.638	323.669	363.246	345.713	293.323	218.867	349.453	320.078	356.793	301.723	255.582	248.628	424.667	276.361	452.767	475.409	377.179	434.791		106.35	101.007	103.941	105.061	99.5588	99.5059	98.817	104.608	99.1662	98.3105	105.357	100.308	95.5392	97.2378	99.909	100.495	105.207	100.521	102.651	99.9571	104.802	98.3171	101.407	96.0685
505.554	360.968	336.809	308.274	304.585	343.257	252.549	279.316	322.891	369.722	342.058	289.479	223.055	353.152	320.967	347.207	300.846	248.351	247.429	428.899	269.296	458.387	468.989	353.131	438.301		104.766	101.61	105.011	104.354	99.089	98.7993	97.9127	104.488	98.928	100.063	104.243	98.9934	97.3671	98.267	100.186	97.7945	104.901	97.6772	102.156	100.953	102.123	99.5376	100.037	89.9433
502.199	355.525	335.932	315.06	306.662	341.491	252.96	283.403	319.548	371.321	343.391	293.223	219.078	349.207	320.167	350.195	300.524	246.695	246.54	430.288	267.908	455.288	470.766	386.618	434.535		104.071	100.078	104.738	106.652	99.7648	98.291	98.072	106.017	97.9036	100.496	104.65	100.273	95.6313	97.1693	99.9367	98.6361	104.788	97.0262	101.789	101.28	101.596	98.8647	100.416	98.4726
499.811	357.869	333.821	309.295	310.316	338.036	249.017	282.759	319.903	371.843	337.271	294.722	222.688	348.952	319.667	344.585	302.779	252.416	246.618	430.466	268.997	451.756	464.268	386.438	431.547		103.576	100.738	104.08	104.7	100.954	97.2967	96.5432	105.776	98.0125	100.637	102.784	100.786	97.2071	97.0982	99.7807	97.0562	105.575	99.2761	101.821	101.322	102.009	98.0976	99.0304	98.4269
502.122	357.835	334.921	312.572	305.151	336.259	250.05	282.659	319.859	373.309	341.781	291.068	222.455	351.508	321.989	342.697	302.279	250.394	247.54	427	264.709	450.767	470.655	384.177	432.236		104.055	100.728	104.423	105.809	99.2733	96.7851	96.9437	105.738	97.9989	101.034	104.159	99.5366	97.1053	97.8096	100.505	96.5243	105.4	98.481	102.202	100.506	100.383	97.883	100.393	97.8508
501.533	360.246	338.698	307.963	301.563	337.947	254.027	284.225	324.169	376.131	348.981	287.469	223.066	353.697	320.778	345.096	298.48	249.85	249.206	427.966	269.396	451.467	461.313	366.304	431.936		103.933	101.407	105.6	104.249	98.1061	97.2711	98.4854	106.324	99.3194	101.798	106.353	98.3059	97.372	98.4184	100.127	97.2001	104.076	98.2669	102.89	100.734	102.161	98.0349	98.4001	93.2987
495.268	361.723	334.366	307.474	306.862	336.837	251.727	286.08	322.658	370.022	341.192	291.057	227.209	350.11	318.301	351.083		252.438	246.962	426.944	267.264	456.432	460.614	399.017	435.457		102.635	101.823	104.249	104.083	99.8298	96.9514	97.594	107.018	98.8565	100.144	103.979	99.5328	99.1806	97.4206	99.3543	98.8864		99.2848	101.964	100.493	101.352	99.1131	98.2509	101.631
501.566	355.192	330.011	311.85	308.45	345.717	251.605	278.782	327.079	371.61	353.202	288.879	223.488	350.244	319.501	350.228		255.682	244.685	427.544	267.297	464.441	465.246	391.952	437.868		103.94	99.9841	102.892	105.565	100.347	99.5073	97.5466	104.288	100.211	100.574	107.64	98.7883	97.5562	97.4577	99.7287	98.6455		100.561	101.023	100.634	101.365	100.852	99.2389	99.8313
[truncated: 3 more columns]

## Sheet: D
1	1	1	1	1	2	2	2	2	2	2	2	2	2	3	3	3	4	4	5	5	5	5	5	5		1	1	1	1	1	2	2	2	2	2	2	2	2	2	3	3	3	4	4	5	5	5	5	5
1	2	3	4	5	1	2	3	4	5	6	7	8	9	1	2	3	1	2	1	2	3	4	5	6		1	2	3	4	5	1	2	3	4	5	6	7	8	9	1	2	3	1	2	1	2	3	4	5
3228.46	2260.87	2206.9	1694.1	1840.75	1764.74	1325.58	1424.47	2077	2190.89	1904.92	1830.04	1204.14	2163.75	1919.17	2087.02	1972.69	1671.92	1563.45	2482.25	1693.27	2829.62	3063.6	2492.06	2494.55		482.554	355.248	320.736	295.411	307.385	347.428	257.933	267.319	326.39	369.488	328.134	292.423	229.086	359.38	320.37	355.037	286.791	254.257	242.206	424.849	263.698	460.516	468.814	392.615
3211.38	2257.57	2172.07	1718.06	1829.6	1734.15	1310.06	1409.66	2072.95	2206.23	1873.79	1807.99	1217.03	2135.68	1902.62	2058.01	1950.98	1676.26	1569.21	2485.37	1661.07	2795.68	3069.92	2445.1	2497.9		483.043	358.347	329.789	298.299	313.194	364.934	255.667	273.362	337.72	370.033	327.301	303.997	229.653	359.691	324.635	359.591	295.255	251.857	243.015	424.727	267.808	443.844	478.411	398.868
3210.09	2235.17	2143.44	1714.06	1814.06	1739.72	1305.46	1390.4	2066.17	2182.95	1875.02	1798.64	1192.57	2123.99	1887.65	2074.34	1948.58	1654.78	1537.94	2433.61	1667.64	2785.02	3076.08	2413.07	2497.61		489.819	358.003	327.279	293.689	315.5	362.146	272.484	277.394	333.799	373.754	332.122	301.998	222.477	359.525	327.234	351.86	300.331	251.824	236.751	424.627	269.485	447.021	472.702	394.336
3224.57	2215.4	2120.43	1715.95	1802.11	1731.33	1304.57	1381.85	2035.21	2160.34	1866.15	1784.85	1195.99	2104.21	1853.1	2065.56	1933.43	1667.53	1526.35	2429.8	1649.38	2770.17	3038.84	2397.38	2502.99		478.766	363.468	321.181	296.744	316.979	349.661	264.687	290.968	333.455	381.063	339.053	309.295	235.262	365.045	329.767	358.647	294.722	256.678	234.807	432.758	266.775	468.847	476.334	401.09
3215.52	2215.43	2115.17	1740.25	1786.63	1704.21	1294.48	1393.92	2040.43	2151.87	1846.86	1768.1	1188.59	2112.55	1850.16	2072.16	1919.76	1670.28	1532.61	2416.16	1628.17	2770.36	3039.58	2407.9	2499.44		483.587	364.968	322.758	297.999	314.878	349.183	252.013	288.368	348.672	382.407	351.238	310.295	218.567	375.264	334.599	358.708	303.797	257.356	240.527	434.957	271.629	476.167	472.524	401.179
3222.45	2203.86	2094.29	1757.73	1782.46	1715.66	1313.07	1369.06	2036.63	2132.66	1846.74	1784.84	1182.39	2128.75	1865.44	2083	1902.53	1662.97	1495.67	2384.23	1631.45	2782.15	3052.02	2403.96	2486.72		487.504	366.7	333.11	308.94	321.255	347.417	268.141	285.925	347.517	379.841	342.819	307.607	219.423	370.866	330.278	356.242	298.388	255.789	241.405	418.529	271.218	481.132	468.392	397.002
3237.48	2183.38	2070.53	1782.67	1777.32	1710.37	1301.81	1369.81	2031.53	2145.2	1826.82	1765.23	1192.76	2127.54	1835.6	2118.23	1888.77	1663.42	1496.99	2375.36	1609.41	2768	3043.32	2421.69	2514.41		482.583	369.255	332.777	295.711	325.422	349.195	269.763	287.802	343.207	377.353	348.639	303.397	219.689	375.831	326.346	352.354	301.687	257.822	242.682	428.493	268.541	484.831	471.629	392.715
3247.54	2191.5	2070.31	1791.63	1747.42	1711.85	1322.53	1341.08	2025.98	2138.75	1835.05	1766.35	1186.69	2140.74	1823.66	2130.68	1876.64	1675.03	1494.85	2366.53	1603.82	2790.77	3037.94	2409.85	2528.77		482.15	369.4	336.92	303.564	325.652	327.968	271.44	291.99	348.872	385.606	344.107	318.104	235.407	370.415	315.338	347.367	302.886	270.807	241.405	433.369	272.962	479.033	472.318	396.18
3270.7	2189.98	2040.54	1800.92	1737.56	1715.43	1314.6	1339.18	2039.2	2183.69	1833.9	1769.76	1193.21	2158.01	1855.68	2127.89	1872.11	1693.65	1473.41	2371.93	1600.39	2784.77	3038.62	2426.09	2551.71		479.473	365.356	336.787	298.688	324.932	337.787	265.42	285.158	352.394	379.685	355.559	308.718	232.108	374.341	319.87	350.388	302.564	266.564	243.482	433.547	269.585	468.67	476.339	394.858
3245.68	2180.36	2051.56	1806.49	1753.13	1719.58	1322.88	1339.2	2053.33	2202.22	1825.2	1773.33	1199.39	2164.24	1865.68	2161.45	1861.94	1701.78	1468.07	2406.75	1586.83	2789.59	3027.38	2450.27	2582.22		476.496	376.042	346.44	307.318	336.687	361.535	263.903	286.258	351.149	386.139	353.438	314.305	230.886	375.018	339.375	347.933	299.765	268.108	242.271	437.235	271.374	461.116	475.572	391.448
3247.78	2164.31	2042.23	1821.68	1751.01	1729.57	1359.75	1337.12	2064.2	2195.55	1822.19	1782.84	1189.3	2169.74	1881.68	2154.86	1870.95	1727.7	1461.19	2403.82	1571.56	2797.05	3037.7	2454.34	2603.63		488.17	369.288	345.884	305.93	331.289	356.614	262.432	280.16	332.777	387.161	343.785	311.639	222.899	376.161	329.167	345.378	302.575	270.252	239.117	426.227	263.276	462.705	464.087	392.259
3246.72	2173.82	2028.29	1814.15	1745.8	1724.31	1372.25	1328.61	2074.82	2223.3	1818.03	1789	1179.65	2191.13	1892.35	2179.08	1863.48	1735.33	1451.79	2394.06	1567.62	2805.34	3023.26	2463.99	2615.74		493.902	365.756	345.251	305.319	325.391	333.433	263.987	286.058	330.122	380.43	353.016	310.451	224.665	375.875	335.743	344.49	298.621	268.586	241.916	427.071	258.844	460.983	473.484	386.394
3234.28	2147.98	2016.97	1849.41	1740.75	1713.33	1385.56	1317.92	2057.74	2239.83	1823.15	1805.95	1192.31	2204.87	1892.47	2208.92	1869.11	1740.17	1454.82	2420.53	1545.38	2812.75	3023.8	2493.28	2652.79		493.047	358.514	341.919	307.618	327.934	357.592	258.211	288.824	345.218	380.918	341.863	302.264	224.21	379.53	336.132	338.714	297.954	270.985	244.337	432.48	265.498	463.949	471.707	384.217
3225.1	2172.24	2013.3	1837.64	1750.83	1708.35	1409.18	1328.15	2074.48	2235.51	1827.64	1808.76	1212.12	2212.28	1906.07	2219.92	1863.23	1752.6	1454.63	2424.88	1553.45	2864.93	3020.14	2486.94	2678.65		491.358	363.779	341.941	308.162	328.379	357.814	252.99	270.174	349.317	374.609	344.929	305.286	230.897	371.354	332.066	338.858	298.377	265.586	244.848	425.449	263.976	466.204	473.629	389.097
3232.78	2192.34	2001.58	1852.89	1743.1	1720.81	1422.24	1317.47	2086.71	2236.04	1845.76	1799.45	1197.11	2205	1898.37	2224.39	1844.4	1768.25	1454.4	2432.68	1528.39	2874.91	3028.94	2489.18	2680.9		480.873	356.148	337.509	304.564	319.648	361.58	261.047	267.564	349.539	366.867	340.02	309.862	228.775	359.98	322.525	342.013	299.065	271.129	244.015	413.42	258.411	473.413	467.064	395.328
3209.13	2214.25	1987.11	1841.56	1736.42	1704.79	1445.85	1325.32	2082.17	2247.35	1840.39	1798.95	1210.02	2197.44	1915.52	2255.55	1846.2	1777.13	1466.38	2477.58	1526.96	2884.19	3044.59	2503.71	2726.28		511.03	364.634	337.953	304.952	318.682	365.201	259.236	280.704	338.82	375.742	348.595	304.752	226.554	354.571	331.689	353.265	297.066	265.731	241.027	420.662	268.486	478.811	462.976	388.975
3215.26	2235.13	1996.19	1844.5	1742.11	1711.06	1433.16	1312.17	2119.99	2233.04	1851.43	1829.66	1210.35	2198.99	1922.82	2256.64	1834.61	1777.75	1462.47	2467.85	1518.15	2921.84	3038.24	2509.17	2735.96		505.909	361.202	337.254	300.354	317.204	364.29	260.78	280.238	337.431	374.454	338.887	301.631	227.887	349.994	332.884	347.356	299.798	271.34	243.604	418.796	265.442	469.147	471.518	391.318
3200.45	2242.91	1985.58	1844.12	1744.58	1715.98	1469.33	1325.55	2087.91	2219.71	1848.54	1790.43	1222.32	2206.39	1933.97	2256.6	1844.34	1791.12	1452.95	2479.85	1504.49	2921.66	3056.31	2526.4	2765.33		508.486	367.111	337.654	300.898	318.459	354.471	263.435	280.915	341.797	375.509	345.529	310.851	231.119	352.771	335.505	350.421	298.543	268.041	247.714	424.316	257.878	466.159	468.997	385.654
3223.69	2244.8	1996.23	1857.61	1754.11	1700.49	1470.76	1313.86	2094.38	2214.91	1858.01	1794.83	1202.2	2198.83	1924.28	2274.9	1848.19	1806.4	1450.44	2502.78	1500.55	2941.9	3049.29	2519.71	2780.81		496.012	365.279	338.431	297.688	325.579	354.093	260.969	286.636	346.262	372.976	344.885	307.751	229.653	351.405	338.716	351.788	301.165	264.953	242.571	427.315	264.709	473.923	469.919	380.766
3197.31	2264.17	1990.04	1839.18	1742.55	1724.19	1488.68	1306.73	2075.61	2196.24	1864.38	1792.67	1217.38	2161.11	1916.47	2274.89	1839.26	1799.08	1445.24	2481.96	1502.78	2938.37	3049.66	2532.86	2813.2		497.123	362.302	338.953	290.601	321.736	352.505	261.88	288.757	346.717	376.72	346.518	302.586	229.575	358.547	338.249	352.188	300.506	264.254	242.849	420.64	268.13	472.113	467.853	381.066
3196.07	2270.17	1996	1843.19	1727.74	1714.96	1483.9	1315.95	2065.46	2174.19	1864.21	1797.4	1223.25	2147.06	1936.62	2266.78	1823.93	1780.79	1460.93	2466.91	1497.93	2969.85	3062.61	2531.9	2823.97		493.491	365.618	345.351	293.267	326.401	352.56	253.538	287.602	346.529	375.52	345.451	297.832	228.509	362.713	341.07	351.199	310.284	261.677	237.75	417.896	264.531	471.735	465.32	384.976
3190.53	2288.4	2010.55	1853.5	1736.94	1702.79	1521.17	1306.03	2080.32	2183.36	1867.82	1791.66	1228.74	2146.76	1920.04	2282.4	1849.06	1769.6	1466.01	2462.7	1492.84	2974.83	3070.38	2563.02	2840.2		490.236	370.495	344.907	285.114	322.869	341.075	257.759	292.889	338.476	383.951	341.297	294.056	228.909	359.458	336.894	360.411	314.76	260.434	239.217	424.997	262.265	472.402	471.407	380.133
3213.3	2260.65	2010.08	1815.61	1742.58	1716.67	1535.88	1315.95	2096.18	2196.91	1868.99	1802.26	1250.03	2142.62	1930.56	2291.76	1849.26	1749.54	1449.98	2503.77	1488.13	2954.93	3073.07	2580.95	2841.75		481.006	368.14	335.91	291.856	316.504	356.87	260.713	282.292	338.042	377.63	338.564	293.1	231.241	363.001	339.782	359.366	306.071	261.143	243.96	417.544	260.666	467.037	465.542	396.584
3161.88	2273.37	2001.17	1783.82	1729.05	1709.11	1526.74	1306.33	2100.06	2196.04	1866.64	1804.38	1250.19	2149.63	1933.22	2292.28	1835.2	1748.81	1460.53	2476.31	1500.75	2968.21	3076.34	2613.02	2858.57		482.05	366.152	340.575	290.268	322.869	353.882	256.348	286.936	333.844	385.761	351.772	296.555	230.775	364.623	336.638	360.588	312.939	253.823	240.55	426.622	261.088	462.782	461.877	397.095
3101.68	2256.43	1994.31	1763.93	1739.82	1725.77	1547.85	1299.37	2096.18	2195.91	1868.81	1805.09	1232.91	2149.35	1933.86	2299.25	1852.33	1746.07	1444.72	2475.6	1520.19	2991.02	3069.2	2643.19	2851.44		483.105	365.341	339.364	296.788	323.824	347.317	258.148	282.437	335.588	375.364	349.728	287.224	229.142	361.591	335.028	356.667	308.599	250.113	244.171	429.221	262.909	468.703	464.765	387.664
3083.04	2250.68	2003.04	1768.27	1753.13	1691.57	1552.41	1310.18	2099.79	2231.31	1880.47	1812.5	1257.58	2146.94	1925.49	2324.15	1850.4	1729.68	1463.9	2432.38	1538.11	2997.74	3101.49	2677.16	2844.87		490.048	360.964	335.643	293.478	315.96	349.328	258.547	288.435	331.611	379.463	352.86	287.18	225.343	360.88	331.562	357.189	303.397	252.402	244.482	423.723	261.032	464.715	465.875	386.831
3057.22	2229.08	1997.69	1766.95	1740.26	1691.13	1555.26	1308.15	2124.19	2215.02	1890.77	1793.03	1239.64	2135.47	1953.97	2314.22	1849.73	1737.93	1464.83	2443.3	1555.44	2984.3	3095.73	2704.52	2838.94		488.737	359.376	337.343	292.045	325.602	349.805	258.57	285.314	332.455	385.639	347.506	289.157	226.043	361.213	331.64	353.89	301.587	244.737	243.093	423.956	263.543	462.105	466.853	384.92
3062.5	2204.34	1999.52	1753.07	1772.31	1697.73	1562.22	1310.66	2103.71	2256.96	1886.76	1767.68	1241.29	2129.29	1953.22	2286.27	1880.5	1735.66	1461.4	2435.56	1577.03	2999.12	3085.21	2728.19	2837.01		490.381	353.111	332.1	302.842	317.993	346.273	262.613	295	330.567	380.641	343.474	289.013	225.687	356.926	330.174	354.646	305.063	245.537	241.494	416.481	266.531	467.47	464.398	393.796
3090.09	2202.2	2010.75	1764.7	1785.2	1692.91	1556.59	1320.05	2087.95	2252.29	1899.83	1776.76	1255.57	2145.64	1940.16	2269.76	1894.2	1740.57	1477.04	2419.76	1585.11	3004.5	3094.68	2742.8	2806.74		492.325	351.845	328.256	298.277	318.37	348.239	259.958	289.768	327.623	383.173	355.715	284.503	221.155	359.18	327.919	355.179	302.164	245.115	245.481	416.803	268.252	462.794	462.465	395.817
3123.94	2162.83	2020.75	1770.37	1789.29	1710.42	1562.47	1298.8	2101.69	2269.69	1911.96	1773.75	1235.15	2153.74	1951.17	2288.64	1874.82	1758.16	1483.82	2392.46	1597.8	3002.13	3097.79	2771.44	2803.37		488.404	346.902	330.045	305.93	310.851	358.636	259.458	290.646	334.177	385.195	344.974	287.869	221.955	363.768	326.686	353.957	296.955	247.814	241.594	415.592	267.886	455.518	461.866	400.327
3126.32	2130.71	2019.18	1756.74	1810.12	1692.75	1577.27	1324.6	2087.6	2287.4	1907.2	1771.17	1256.88	2162.48	1969.12	2275.46	1909.31	1738.3	1500	2405.47	1615.37	3023.46	3108.37	2786.43	2803.66		495.29	355.244	333.799	303.919	312.917	358.669	264.312	293.978	329.789	385.195	348.495	286.402	223.177	363.424	324.953	354.235	296.455	247.37	244.759	415.87	266.686	457.306	464.923	394.206
3149.3	2126.55	1998.37	1747.25	1827.67	1699.88	1581.52	1326.41	2117.69	2290.82	1925.91	1805.04	1257.58	2186.98	1965.43	2293.24	1936.52	1745.64	1521.58	2405.21	1649.81	3003.01	3127.46	2802.96	2797.24		490.714	361.386	331.766	304.008	308.451	350.105	260.414	291.79	332.144	384.062	352.982	290.923	225.41	360.536	321.598	350.391	292.378	247.292	242.016	412.715	268.13	465.759	463.024	395.384
3177.56	2136.08	2012.65	1761.02	1820.86	1683.4	1575.79	1337.64	2088.49	2304.85	1902.14	1797.04	1270.58	2186.81	1988.91	2277.05	1948.56	1755.62	1545.87	2398.15	1656.84	3004.63	3128.6	2849.18	2780.99		488.215	359.043	332.266	311.328	310.795	342.541	261.669	297.366	327.512	379.219	352.149	289.146	225.832	355.115	319.355	348.037	296.433	243.193	247.192	420.002	264.798	465.259	465.579	392.774
3207.97	2144.07	2011.81	1771.37	1827.07	1705.84	1587.33	1374.68	2090.37	2306.53	1912.89	1791.16	1268.28	2190.75	1969.09	2270.65	1989.25	1757.91	1553.97	2401.8	1631.75	2995.14	3136.95	2850.11	2786.98		489.015	359.842	331.255	307.318	310.684	350.905	257.181	296.655	328.434	379.53	347.562	288.902	224.343	362.957	318.355	350.714	295.033	244.682	245.648	418.047	266.12	462.638	473.688	403.304
3213.26	2153.73	2020.93	1777.86	1842.1	1705.14	1582.03	1387.35	2105.74	2315.57	1927.42	1796.06	1270.11	2209.55	1976.75	2292.08	1999.41	1747.3	1590.87	2440.36	1674.36	2943.57	3169.83	3122.56	2788.11		491.725	358.176	330.111	308.44	316.193	348.095	253.627	289.768	322.825	377.164	354.171	288.99	223.377	358.469	317.755	347.681	304.797	246.737	245.581	415.926	267.975	459.694	480.274	396.428
3236.76	2169.35	2033.02	1786.8	1839.7	1707.78	1565.46	1371.31	2109.37	2349.84	1961.74	1811.41	1274.84	2223.99	1980.24	2283.52	2014.19	1750.05	1593.12	2438.75	1703.27	2933.88	3201.23	2931.98	2788.86		488.004	359.12	330.745	310.995	307.951	342.341	254.649	294.5	328.001	375.198	351.549	290.668	219.378	360.735	319.588	346.537	296.31	254.304	240.849	417.425	268.541	462.227	477.209	398.916
3257.88	2150.56	2018.03	1786.58	1849.78	1704.59	1573.69	1381.06	2103.76	2320.24	1971.34	1801.46	1258.68	2219.86	1997.78	2274.87	2038.73	1749.29	1615.82	2430.45	1678.16	2932.1	3232.72	2930.8	2774.46		491.036	356.321	328.145	314.15	307.74	339.564	255.515	288.724	329.267	369.144	345.329	289.002	216.135	362.868	319.855	356.567	301.065	252.827	244.082	415.059	267.453	466.448	483.696	394.884
3263.22	2167.36	2027	1793.48	1844.55	1729.8	1563.61	1408.76	2114.91	2329.33	1984.02	1809.85	1271.86	2230.56	1988.26	2283.53	2057.65	1782.2	1637.33	2436.28	1716.3	2959.07	3281.59	2936.69	2782.75		496.523	352.145	324.38	311.361	307.041	342.852	256.104	285.214	328.301	371.688	342.674	288.746	216.79	364.134	322.822	350.58	298.421	252.405	239.283	416.47	269.119	464.271	479.675	396.25
3285.18	2172.24	2044.88	1793.31	1837.57	1728.38	1554.59	1422.67	2106.17	2325.73	2011.36	1809.92	1291.44	2228.04	1987.06	2291.53	2081.37	1784.83	1613.37	2428.46	1732.2	2955.27	3321.49	2953.12	2791.13		492.147	357.221	330.556	314.538	304.475	340.908	254.682	292.434	327.868	367.9	342.119	293.945	216.857	358.092	325.499	358.426	294.955	252.56	246.496	415.226	269.818	460.839	471.621	402.115
3308.06	2192.29	2041.62	1769.41	1848.03	1756.25	1562.1	1431.93	2124.05	2338.11	2016.3	1822.1	1294.91	2230	1997.69	2306.33	2080.86	1780.26	1641.3	2440.29	1738.98	2967.04	3367.29	2955.55	2783.78		490.703	356.832	328.045	316.171	311.132	338.453	253.427	293.167	329.856	377.619	341.663	296.533	218.301	358.392	325.432	352.346	302.131	250.517	246.484	417.247	270.929	461.794	473.71	405.319
3303.27	2180.3	2061.22	1784.59	1849.41	1756	1569.32	1440.79	2111.31	2330.41	2010.8	1847.78	1290.6	2230.18	2011.93	2301.81	2085.51	1796.99	1661.89	2466.44	1745.62	2970.87	3366.89	2970.73	2782.93		493.935	353.078	326.801	316.926	310.01	348.661	256.559	285.081	327.023	375.076	338.209	289.457	217.479	358.88	325.443	350.125	295.777	252.205	249.428	425.078	272.84	457.973	478.431	391.797
3321.42	2179.64	2063.52	1781.79	1852.73	1792.2	1569.66	1440.96	2118.82	2323.89	2020.47	1839.56	1308.8	2244.57	2008.99	2319.86	2089.26	1781.32	1673.49	2466	1737.98	2992.96	3401.26	2969.82	2785.22		485.282	350.468	327.368	314.927	313.434	349.128	254.582	285.947	329.889	373.309	338.242	292.512	218.279	360.547	321.156	354.901	296.91	254.638	247.562	427.366	268.263	459.906	471.188	379.312
3363.6	2173.47	2060.08	1793.77	1877.68	1799.19	1556.3	1450.54	2135.88	2325.68	2035.77	1841.35	1294.73	2207.87	2022.04	2311.77	2120.55	1783	1680.57	2450.87	1763.45	2980.71	3411.06	2964.92	2787.24		494.791	350.412	323.369	315.194	313.956	343.63	253.105	283.603	329.223	372.31	338.875	296.255	219.134	360.18	322.255	356.467	298.143	251.028	248.639	427.222	270.785	458.617	471.122	349.532
3355.63	2166.45	2055.59	1821.81	1876.07	1804.95	1592.82	1462.4	2130.86	2301.87	2059.94	1870.64	1302.61	2235.98	2010.82	2330.62	2129.97	1785.88	1690.9	2452.23	1756.09	2965.64	3404.45	2962.59	2802.62		501.766	350.079	325.868	316.893	312.512	348.006	253.96	282.204	329.967	374.254	336.998	294.311	219.6	357.392	324.699	357.056	290.957	250.272	247.517	426.278	270.063	454.263	474.343	381.3
3351.85	2158.38	2065.51	1822.05	1873.71	1825.82	1579.35	1496.85	2142.16	2318.23	2052.2	1859.3	1293.5	2225.59	2028.06	2307.13	2138.59	1775.05	1700.55	2436	1741.42	2969.83	3431.4	2954.23	2795.13		503.399	359.754	330.145	316.538	309.447	341.475	251.994	279.882	328.612	375.242	335.832	296.733	219.745	357.27	321.867	356.501	302.064	245.962	250.106	428.499	268.697	456.384	473.921	378.045
3368.83	2171.1	2081.67	1839.43	1873.04	1859.28	1578.28	1497.98	2146.64	2312.29	2051.29	1858.9	1317.5	2245.36	2041.35	2330.31	2135.54	1783.54	1695.95	2455.04	1784.49	2980.49	3424.75	2930.82	2800.71		509.264	358.602	327.179	312.75	307.869	340.897	251.161	282.826	327.923	375.098	336.021	296.755	218.401	356.57	321.689	361.236	300.054	249.484	251.05	426.911	268.997	451.852	476.32	380.708
3375.95	2183.06	2100.01	1854.6	1880.37	1851.14	1576.53	1496.76	2128.98	2289.87	2066.76	1853.44	1309.12	2215.79	2054.59	2332.77	2169.92	1792.42	1685.03	2467.41	1775.82	2998.13	3454.17	2940.63	2812.16		504.377	361.712	332.933	314.838	302.649	340.377	255.271	289.479	330.211	372.81	330.878	296.122	214.28	358.781	322.1	358.037	299.991	251.039	250.605	421.668	272.784	460.709	477.286	365.216
3371.75	2187.4	2080.11	1849.85	1873.76	1857.38	1592.18	1519.54	2150	2304.77	2075.34	1860.06	1320.66	2246.71	2051.7	2339.01	2169.63	1805.75	1698.92	2470.31	1803.38	3008.83	3465.28	2930.58	2829.94		510.475	358.48	328.856	311.484	304.159	341.81	255.16	288.979	325.746	374.187	330.678	294.167	217.001	352.238	322.255	356.604	298.469	255.448	251.239	423.812	268.563	455.899	476.864	380.034
3366.21	2192.87	2076.94	1865.24	1851.82	1884.09	1601.26	1494.56	2148.9	2284.09	2070.68	1862.04	1307.46	2245.69	2042.94	2350.85	2156.49	1789.84	1733.14	2446.54	1785.65	3010.38	3443.88	2938.51	2841.39		509.308	359.124	335.476	312.061	302.227	335.032	254.46	291.734	326.39	368.744	332.566	292.745	220.067	354.993	324.899	355.404	305.033	252.694	244.552	421.49	264.453	461.131	483.285	379.051
3362.73	2202.09	2112.35	1856.28	1860.2	1876.29	1593.65	1523.17	2126.95	2325.95	2094.6	1860.13	1323.2	2253.72	2057.38	2363.8	2177.89	1790.15	1712.48	2475.93	1800.04	3012.86	3480.64	2946.68	2844.29		506.043	359.624	329.301	313.972	310.972	340.823	253.693	288.08	326.846	375.164	336.245	299.232	214.757	353.86	322.922	355.993	302.545	251.783	243.619	427.955	267.997	459.731	480.074	365.908
3360.25	2219.84	2106.22	1883.03	1844.54	1891.56	1590.06	1537.09	2122.41	2306.97	2086.21	1859.59	1324.76	2233.04	2076.04	2370.5	2193.33	1796.54	1729.75	2462.3	1801.37	3020.55	3457	2929.74	2848.89		507.409	362.601	330.789	311.872	310.405	343.788	251.305	287.846	323.491	375.209	338.901	301.587	217.834	353.56	323.344	354.127	305.933	249.284	245.118	426.278	275.028	454.777	474.643	382
3362.14	2208.59	2131.34	1864.2	1853.23	1904.64	1574.44	1532.19	2167.87	2312.8	2096.25	1851.45	1342.11	2272.1	2075.5	2388.96	2194.09	1814.39	1716.69	2466.56	1818.12	3021.08	3446.14	2936.55	2851.81		515.695	356.336	326.624	310.451	312.105	345.556	247.551	290.746	330.922	374.342	343.758	299.854	218.223	353.804	318.19	350.761	304.656	251.65	248.417	425.467	272.984	454.177	473.154	377.346
3384.45	2188.08	2139.27	1866.21	1841.76	1918.26	1594.23	1525.76	2163.66	2289.49	2102.89	1863.52	1326.08	2258.97	2090.02	2349.87	2194.66	1810.61	1718.26	2488.52	1830	3021.37	3461.66	2945.14	2873.72		507.453	358.657	327.834	307.74	307.451	348.255	246.895	280.249	326.324	370.699	345.668	295.366	215.179	351.719	317.057	349.739	303.445	253.471	246.551	426.278	269.496	455.077	470.033	392.208
3378.25	2199.9	2134.75	1868.68	1853.11	1889.91	1588.69	1525.2	2116.99	2289.49	2117.77	1872.16	1334.75	2283.99	2109.17	2384.65	2192.38	1818.39	1707.61	2493.37	1812.9	3052.17	3444.33	2929.29	2858.13		513.196	358.824	333.377	310.362	306.029	345.712	254.882	279.638	323.669	363.246	345.713	293.323	218.867	349.453	320.078	356.793	301.723	255.582	248.628	424.667	276.361	452.767	475.409	377.179
3383.92	2180.98	2132.18	1870.48	1859.33	1911.12	1593.41	1519.26	2162.2	2285.49	2106.34	1873.03	1326.38	2287.05	2095.9	2380.71	2201.6	1788.31	1714.04	2493.59	1833.65	3053.66	3470.98	2936.89	2878.06		505.554	360.968	336.809	308.274	304.585	343.257	252.549	279.316	322.891	369.722	342.058	289.479	223.055	353.152	320.967	347.207	300.846	248.351	247.429	428.899	269.296	458.387	468.989	353.131
3372.66	2188.15	2145.04	1862.12	1842.13	1894.31	1610.19	1523.5	2129.39	2318.15	2115.07	1881.73	1335.51	2293.31	2108.61	2380.22	2157.05	1819.4	1709.86	2520.17	1845.97	3024.57	3454.78	2930.76	2864.02		502.199	355.525	335.932	315.06	306.662	341.491	252.96	283.403	319.548	371.321	343.391	293.223	219.078	349.207	320.167	350.195	300.524	246.695	246.54	430.288	267.908	455.288	470.766	386.618
3403.12	2202.89	2188.37	1880.04	1853.62	1898.45	1620.4	1502.91	2163.12	2300.22	2092.77	1902.83	1314.67	2295.74	2120.55	2404.42	2177.44	1807.3	1700.62	2499.18	1846.36	3053.63	3439.14	2926.96	2897.15		499.811	357.869	333.821	309.295	310.316	338.036	249.017	282.759	319.903	371.843	337.271	294.722	222.688	348.952	319.667	344.585	302.779	252.416	246.618	430.466	268.997	451.756	464.268	386.438
3432.71	2184.67	2213.01	1888.35	1855.52	1914.2	1605.71	1512.51	2172.84	2312.5	2118.05	1876.36	1308.46	2300.98	2114.51	2398.61	2173.1	1811.7	1697.04	2525.51	1844.61	3058.53	3475.96	2931.62	2865.54		502.122	357.835	334.921	312.572	305.151	336.259	250.05	282.659	319.859	373.309	341.781	291.068	222.455	351.508	321.989	342.697	302.279	250.394	247.54	427	264.709	450.767	470.655	384.177
3422	2206.49	2250.11	1881.17	1835.11	1894.39	1604.5	1501.93	2152.95	2336.64	2114.34	1895	1302.84	2316.01	2120.67	2392.63	2183.79	1818.2	1678.71	2503.94	1855.52	3055.34	3451.93	2919.14	2891.37		501.533	360.246	338.698	307.963	301.563	337.947	254.027	284.225	324.169	376.131	348.981	287.469	223.066	353.697	320.778	345.096	298.48	249.85	249.206	427.966	269.396	451.467	461.313	366.304
3423.69	2199.36	2260.44	1872.19	1823.32	1903.74	1608.21	1504.35	2185.17	2313.72	2127.43	1887.66	1325.08	2330.71	2124.3	2415.33	2163.4	1820.86	1674.09	2519.27	1849.13	3063.68	3426.52	2917.97	2900.62		495.268	361.723	334.366	307.474	306.862	336.837	251.727	286.08	322.658	370.022	341.192	291.057	227.209	350.11	318.301	351.083		252.438	246.962	426.944	267.264	456.432	460.614	399.017
3448.15	2199.06	2277.59	1891.83	1835.28	1913.02	1605.76	1500.71	2167.98	2319.74	2093.46	1907.91	1317.73	2307.13	2142.17	2422.81	2145.68	1827.96	1667.97	2498.6	1886.3	3073.78	3452.51	2930.37	2920.25		501.566	355.192	330.011	311.85	308.45	345.717	251.605	278.782	327.079	371.61	353.202	288.879	223.488	350.244	319.501	350.228		255.682	244.685	427.544	267.297	464.441	465.246	391.952
[truncated: 53 more columns]
