# Supplementary material for: A mechano-osmotic feedback couples cell volume to the rate of cell deformation
Source: eLife journal article supplement (doi:10.7554/elife.72381), 2022-04-13
Supplement: supp [file median_dVdt_dAdt.xlsx]

## Sheet: Sheet1
	dA/dt i	stdev	sterr	dV/dt i	stdev	sterr
control, n=194	15.4299	11.327	0.813231	-5.88297	9.08106	0.651982
Y-27, n=121	34.1766	15.2972	1.39065	-16.2314	13.7853	1.25321
EIPA, n=117	20.0627	11.4192	1.05571	-3.83356	7.72575	0.714246
EIPA+Y-27, n=50	33.3552	12.4966	1.76729	1.9946	13.1362	1.85774
LatA, n=41	9.601	7.54742	1.17871	-3.12487	6.0181	0.93987
GdCl3, n=40	22.6786	9.30975	1.27879	-8.4537	7.82682	1.0751
CK-666, n=54	12.4705	11.1741	1.5206	-2.87118	9.58937	1.30495
CK-666+Y-27, n=74	26.825	14.3974	1.67367	-3.25268	7.38996	0.859065
MnCL2, n=57	30.925	8.79745	1.16525	-8.50026	11.8774	1.5732
