# Supplementary material for: A mechano-osmotic feedback couples cell volume to the rate of cell deformation
Source: eLife journal article supplement (doi:10.7554/elife.72381), 2022-04-13
Supplement: supp [file medium_exchange_in_the_chamber.xlsx]

## Sheet: Sheet1
Stack.tif	160.643	0	1
Stack.tif	159.063	0.1	2
Stack.tif	159.005	0.2	3
Stack.tif	159.176	0.3	4
Stack.tif	159.21	0.4	5
Stack.tif	156.677	0.5	6
Stack.tif	152.705	0.6	7
Stack.tif	150.957	0.7	8
Stack.tif	149.138	0.8	9
Stack.tif	149.967	0.9	10
Stack.tif	149.38	1	11
Stack.tif	149.817	1.1	12
Stack.tif	145.261	1.2	13
Stack.tif	146.244	1.3	14
Stack.tif	145.013	1.4	15
Stack.tif	144.729	1.5	16
Stack.tif	144.662	1.6	17
Stack.tif	146.887	1.7	18
Stack.tif	147.244	1.8	19
Stack.tif	144.916	1.9	20
Stack.tif	146.225	2	21
Stack.tif	147.131	2.1	22
Stack.tif	148.923	2.2	23
Stack.tif	151.901	2.3	24
Stack.tif	153.512	2.4	25
Stack.tif	154.885	2.5	26
Stack.tif	154.977	2.6	27
Stack.tif	154.889	2.7	28
Stack.tif	155.233	2.8	29
Stack.tif	155.325	2.9	30
Stack.tif	155.729	3	31														0		155.729
Stack.tif	155.379	3.1	32														0.1		155.379
Stack.tif	154.484	3.2	33														0.2		154.484
Stack.tif	155.503	3.3	34														0.3		155.503
Stack.tif	162.05	3.4	35														0.4		162.05
Stack.tif	162.927	3.5	36														0.5		162.927
Stack.tif	162.348	3.6	37														0.6		162.348
Stack.tif	162.174	3.7	38														0.7		162.174
Stack.tif	161.667	3.8	39														0.8		161.667
Stack.tif	159.671	3.9	40														0.9		159.671
Stack.tif	158.985	4	41				0										1		158.985
Stack.tif	159.388	4.1	42				0.1										1.1		159.388
Stack.tif	162.952	4.2	43				0.2										1.2		162.952
Stack.tif	157.767	4.3	44				0.3										1.3		157.767
Stack.tif	161.003	4.4	45				0.4										1.4		161.003
Stack.tif	423.302	4.5	46				0.5										1.5		423.302
Stack.tif	769.749	4.6	47				0.6										1.6		769.749
Stack.tif	1635.25	4.7	48				0.7										1.7		1635.25
Stack.tif	434.05	4.8	49				0.8										1.8		434.05
Stack.tif	436.644	4.9	50				0.9										1.9		436.644
Stack.tif	618.519	5	51				1										2		618.519
Stack.tif	780.773	5.1	52				1.1										2.1		780.773
Stack.tif	809.916	5.2	53				1.2										2.2		809.916
Stack.tif	656.369	5.3	54				1.3										2.3		656.369
Stack.tif	224.096	5.4	55				1.4										2.4	0	224.096
Stack.tif	166.212	5.5	56				1.5										2.5	0.1	166.212
Stack.tif	160.357	5.6	57				1.6										2.6	0.2	160.357
Stack.tif	165.642	5.7	58				1.7										2.7	0.3	165.642
Stack.tif	174.091	5.8	59		t (s)		1.8										2.8	0.4	174.091
Stack.tif	909.517	5.9	60		0.7		1.9										2.9	0.5	909.517
Stack.tif	5228.39	6	61				2										3	0.6	5228.39
Stack.tif	12042.1	6.1	62				2.1										3.1	0.7	12042.1
Stack.tif	12914.4	6.2	63				2.2										3.2	0.8	12914.4
Stack.tif	14500.7	6.3	64				2.3										3.3	0.9	14500.7
Stack.tif	18807.7	6.4	65				2.4										3.4	1	18807.7
Stack.tif	18077.4	6.5	66				2.5										3.5	1.1	18077.4
Stack.tif	16725	6.6	67				2.6										3.6	1.2	16725
Stack.tif	15913.1	6.7	68				2.7										3.7	1.3	15913.1
Stack.tif	15668.2	6.8	69				2.8										3.8	1.4	15668.2
Stack.tif	15868.1	6.9	70				2.9										3.9	1.5	15868.1
Stack.tif	16337.1	7	71				3										4	1.6	16337.1
Stack.tif	16920.1	7.1	72				3.1										4.1	1.7	16920.1
Stack.tif	17538.2	7.2	73				3.2										4.2	1.8	17538.2
Stack.tif	18056.2	7.3	74				3.3										4.3	1.9	18056.2
Stack.tif	18563.6	7.4	75				3.4										4.4	2	18563.6
Stack.tif	19103.1	7.5	76				3.5										4.5	2.1	19103.1
Stack.tif	19704.6	7.6	77				3.6										4.6	2.2	19704.6
Stack.tif	20275.2	7.7	78				3.7										4.7	2.3	20275.2
Stack.tif	20778	7.8	79				3.8										4.8	2.4	20778
Stack.tif	21121.3	7.9	80				3.9										4.9	2.5	21121.3
Stack.tif	21346.5	8	81				4										5	2.6	21346.5
Stack.tif	21483.9	8.1	82				4.1										5.1	2.7	21483.9
Stack.tif	21561.8	8.2	83				4.2										5.2	2.8	21561.8
Stack.tif	21568.4	8.3	84				4.3										5.3	2.9	21568.4
Stack.tif	21533.4	8.4	85				4.4										5.4	3	21533.4
Stack.tif	21458	8.5	86				4.5										5.5	3.1	21458
Stack.tif	21366.3	8.6	87				4.6										5.6	3.2	21366.3
Stack.tif	21280.7	8.7	88				4.7										5.7	3.3	21280.7
