# Supplementary material for: A mechano-osmotic feedback couples cell volume to the rate of cell deformation
Source: eLife journal article supplement (doi:10.7554/elife.72381), 2022-04-13
Supplement: supp [file MnCl2_dVdt_dAdt.xlsx]

## Sheet: Sheet1
exp	pos	cell	Vi	t of V loss	deltaV% at t of V loss	A at t of V loss	t of 90	deltaV% at t of 90	deltaS% at t of 90	A at 90	dV/dt i	dA/dt i
1	1	1	1362.21	10	-7.55303	364.854	5	-2.16933	10.6918	188.771	-11.1168	34.4195
1	1	2	3031.2				7	0.58175	8.43426	267.296	2.09749	28.5783
1	1	5	1606.46	9	-4.83066	371.718	4	-1.93004	9.11008	195.948	-8.26856	35.4317
1	1	6	1500.89	8	-15.8858	389.659	3	-8.75888	7.92917	209.261	-17.1735	36.2227
1	1	7	2260.36	14	-7.5952	489.453	3	-0.84784	7.25014	215.709	-14.2781	29.0749
1	3	2	1572.65	12	-3.59864	352.061	5	-0.475172	11.9609	210.093	-5.65608	29.6131
1	3	3	1958.32	9	-4.74208	416.129	3	-0.0790757	11.2382	234.014	-10.1485	35.3877
1	3	10	1645.35	13	-7.27519	321.483	3	-2.03114	9.5694	203.748	-9.81116	20.3425
1	4	2	1962.8	20	-47.0801	380.767	4	-23.901	3.72269	282.793	-79.3625	30.1809
1	5	1	2370.91	16	-6.3852	581.395	4	-0.539994	7.44495	222.781	-10.7369	30.925
1	5	2	2052.68	8	-3.67069	345.613	3	-1.6045	6.58537	199.796	-6.36439	27.4657
1	5	3	2366.4	16	-5.10766	477.597	5	-1.27983	9.93781	258.768	-10.8307	36.3085
1	5	4	1777.95	12	-6.95725	366.31	4	-2.09859	16.9598	274.681	-12.1641	29.4786
1	5	7	1378.29	6	-2.87764	227.774	3	-0.508931	9.08947	169.738	-2.06744	23.7235
1	5	10	1183.62				2	1.19584	8.33401	138.744	9.888	9.91676
1	5	11	1580.86	11	-1.8966	368.494	4	0.3296	15.2494	232.766	-4.35476	31.2411
1	5	12	2802.21				8	1.08419	8.78812	254.399	5.20356	26.2206
1	5	14	1951.83	15	-6.16774	573.49	4	-2.41722	21.5462	326.58	-9.97851	35.2726
1	5	15	1895.88				6	2.80706	11.4301	213.837	2.43875	39.1883
2	2	2	2076.73	15	-10.5538	377.127	3	-2.32069	10.6874	250.863	-16.8251	17.7219
2	3	1	2181.32	15	-6.84574	554.249	6	-2.36232	7.44776	224.341	-11.4528	40.0802
2	3	2	1659.99	25	-7.54316	315.347	18	-6.21304	22.3649	309.107	-9.13425	9.91883
2	3	3	2685.6	21	-9.02576	428.09	10	-6.16636	13.7761	352.269	-16.2579	26.6309
2	3	4	1428.79	14	-6.02909	388.255	3	-1.64337	7.26575	163.602	-6.33792	22.1701
2	3	5	2951.37				30	1.4916	39.6562	561.53	4.90244	4.52723
2	3	6	1892.02	12	-10.361	696.894	4	-2.63246	5.84426	187.939	-20.2642	39.3977
2	3	7	2649.1	13	-8.35592	539.533	4	-2.93406	8.47544	273.016	-22.0473	30.8833
2	3	8	2274.47	15	-10.3801	589.923	3	-1.12603	6.54593	209.469	-20.0759	43.2357
2	3	9	1504.97	10	-4.56267	402.296	3	-1.47081	12.3384	211.341	-6.20659	33.8215
2	5	1	1914.5	22	-11.8833	406.144	6	-6.66678	4.95654	206.868	-14.5192	18.6135
2	5	2	2559.15	11	-6.14395	540.728	3	-1.12329	9.15332	261.888	-16.893	46.2635
2	5	5	2343.64	9	-6.95893	376.087	5	-4.77554	14.1382	318.259	-15.3395	33.4943
2	5	7	1900.02	12	-5.91295	468.756	3	-1.4771	7.28171	196.884	-10.971	36.7951
3	2	1	1582.23	10	-4.14609	320.703	3	-4.14609	18.5381	261.472	-6.23461	22.4969
	2	2	1985.1	18	-7.71584	530.172	3	-4.74724	9.29354	222.781	-9.23228	36.8337
	2	3	1777.89	5	-1.47531	134.064	7	-0.841623	6.79273	178.579	0.627064	25.5588
	2	12	1332.49	6	-1.67698	181.699	5	-1.45355	7.18845	154.449	-1.88916	18.7057
	3	1	2618.61	7	-4.22512	472.396	3	-3.08733	16.7383	358.406	-6.41393	37.7917
	3	2	2169.47	15	-4.15899	529.496	2	-1.24676	-100	236.302	-5.80413	31.5659
	3	3	1606.74	3	-2.37664	125.848	4	-2.02047	2.5148	180.243	4.73205	33.4426
	3	6	1250.28				7	6.74012	12.9647	155.385	9.73304	18.894
	4	1	1556.41	14	-3.60111	394.808	3	-1.0247	10.7417	201.252	-4.62582	26.8081
	4	3	2203.4	17	-7.16096	496.786	3	0.295225	7.45811	205.62	-12.4005	34.4696
	4	4	1551.93	11	-3.11479	281.857	5	-1.16892	6.16956	158.61	-5.65298	23.6415
	4	5	1409.33	6	-4.2853	202.708	5	-3.09275	11.471	202.708	-0.639915	24.4296
	4	7	1445.07	14	-4.83779	502.454	3	-1.35023	16.605	234.43	-2.30537	32.1539
	4	13	1494.36	7	-2.45909	320.131	3	-0.726042	8.33034	173.378	-1.79422	28.5359
	6	2	1983.48	7	-1.29097	322.004	4	0.206537	8.53484	205.308	-2.81479	32.0456
	6	3	1424.36	30	-4.89575	425.906	5	-1.2104	7.04601	158.714	-1.30261	31.9325
	6	5	1162.19	13	-9.13017	306.558	5	-3.32762	7.43399	151.745	-10.0998	21.138
	6	7	1564.79	9	-7.1581	382.691	3	-3.10744	7.62351	185.547	-9.45879	37.7851
	6	9	2257.63	8	-3.49436	539.273	3	-2.23987	8.72512	243.583	-5.72444	51.2082
	6	10	1510.03	18	-9.79788	359.237	4	-4.25353	11.1509	214.773	-12.4541	22.2729
	6	13	1187.8	8	-8.45373	353.517	2	-1.7125	6.80112	141.136	-8.63296	33.2884
	8	4	1566.03	9	-4.51065	430.586	3	-0.43176	12.9631	217.269	-8.50026	37.4665
	8	5	1409.43	17	-6.62639	616.913	3	-0.372788	7.18876	154.033	-4.80165	40.5108
	8	6	1565.47	14	-6.97701	468.132	3	-1.18911	6.60545	164.33	-9.01343	27.8911
