# Supplementary material for: A mechano-osmotic feedback couples cell volume to the rate of cell deformation
Source: eLife journal article supplement (doi:10.7554/elife.72381), 2022-04-13
Supplement: supp [file MnCL2_V_A.xlsx]

## Sheet: V
1	1	1	1	1	3	3	3	4	5	5	5	5	5	5	5	5	5	5	2	3	3	3	3	3	3	3	3	3	5	5	5	5	2	2	2	2	3	3	3	3	4	4	4	4	4	4	6	6	6
1	2	5	6	7	2	3	10	2	1	2	3	4	7	10	11	12	14	15	2	1	2	3	4	5	6	7	8	9	1	2	5	7	1	2	3	12	1	2	3	6	1	3	4	5	7	13	2	3	5
1362.21	3031.2	1606.46	1500.89	2260.36	1572.65	1958.32	1645.35	1962.8	2370.91	2052.68	2366.4	1777.95	1378.29	1183.62	1580.86	2802.21	1951.83	1895.88	2076.73	2181.32	1659.99	2685.6	1428.79	2951.37	1892.02	2649.1	2274.47	1504.97	1914.5	2559.15	2343.64	1900.02	1582.23	1985.1	1777.89	1332.49	2618.61	2169.47	1606.74	1250.28	1556.41	2203.4	1551.93	1409.33	1445.07	1494.36	1983.48	1424.36	1162.19
1352.88	3022.28	1587.91	1404.86	2251.9	1568.24	1961.98	1622.42	1832.6	2374.27	2034.39	2365.56	1772.48	1375.79	1197.77	1589.11	2830.2	1932.95	1919.42	2059.82	2166.54	1652.57	2645.61	1413.26	2937.81	1873.29	2627.71	2271.59	1496.17	1887.79	2552.68	2303.99	1891.33	1571.84	1973.28	1779.92	1326.54	2584.22	2142.42	1571.88	1266.19	1542.29	2206.4	1560.59	1387.83	1440.91	1509.37	2006.55	1420.05	1167.52
1347.61	3027.88	1592.82	1369.43	2241.2	1571.85	1956.77	1611.93	1646.8	2377.67	2019.75	2362.11	1745.03	1371.27	1209.72	1586.45	2813.78	1932.67	1931.81	2028.53	2168.83	1618.01	2619.97	1405.31	2933.84	1875.28	2594.81	2248.85	1482.84	1834.58	2530.41	2280.93	1871.96	1562.71	1962.13	1775.03	1325.37	2537.77	2130.26	1568.55	1299.38	1540.46	2209.9	1555.87	1383.74	1425.56	1483.51	1979.33	1397.22	1147.47
1338.36	3025.57	1575.46	1343.88	2224.96	1565.48	1940.18	1612.79	1493.67	2358.11	2018.52	2351.16	1740.64	1356.86	1214.98	1586.07	2814.95	1904.65	1936.89	2025.61	2169.97	1623.97	2595.65	1395.55	2951.56	1842.21	2571.38	2212.24	1475.58	1817.64	2501.18	2246.43	1857.05	1546.52	1946.73	1763.13	1306.44	2530.48	2129.31	1574.28	1312.5	1520.8	2209.86	1548.08	1365.29	1423	1483.46	1987.57	1413.59	1146.53
1332.66	3028.38	1550.75	1298	2195.83	1565.17	1930.67	1615.41	1346.56	2361.8	1999.73	2336.12	1731.07	1350.79	1228.18	1577.06	2835.76	1899.03	1946.54	2016.77	2142.42	1609.63	2586.58	1370.76	2938.69	1804.98	2545.83	2184.78	1459.56	1797.19	2493.72	2231.72	1854.15	1536.91	1928.45	1751.66	1313.13	2526.31	2121.46	1581.27	1319.71	1516.21	2206.96	1533.79	1365.74	1415.94	1471.25	1974.3	1407.12	1123.52
1319.24	3041.12	1537.76	1274.48	2176.08	1549.5	1912.89	1596.56	1296.87	2361.61	1989.41	2318.62	1711.55	1338.63	1261.8	1572.97	2843.41	1875.88	1949.1	1987.73	2129.79	1596.62	2563.28	1375.09	2945.55	1799.93	2507.18	2180.68	1454.83	1786.87	2468.58	2213.74	1833.68	1546.22	1914.61	1762.75	1296.04	2523.96	2120.87	1622.07	1323.32	1517.02	2210.19	1523.61	1348.93	1417.88	1463.46	1993.7	1412.15	1104.59
1298.38	3048.83	1537.54	1273.52	2172.11	1540.4	1896.22	1579.58	1250.13	2346.57	1984.26	2300.46	1703.3	1344.94	1249.02	1571.58	2839.15	1875.71	1925.43	1988.82	2109.95	1591.61	2552.65	1375.13	2952.5	1774.71	2503.86	2154.46	1449.07	1792.28	2447.81	2212.49	1825.21	1524.15	1909.06	1762.92	1310.15	2507.97	2100.51	1596.94	1334.55	1503.8	2187.09	1526.83	1355.74	1418.24	1457.61	1957.87	1413.13	1090.2
1293.78	3038.61	1531.8	1262.46	2139.33	1526.91	1896.3	1570.77	1232.98	2319.42	1977.33	2294.98	1678.85	1345.75	1265.44	1555.05	2832.59	1868.34	1942.34	1958.94	2101.91	1583.3	2550.89	1365.51	2971.5	1748.32	2472.76	2133.8	1444.02	1790.79	2416.74	2198.06	1813.45	1528.53	1908.61	1778.37	1313.7	2507.53	2110.49	1577.23	1342.07	1507.06	2167.49	1524.99	1356.58	1418.39	1465.91	1971.01	1408.24	1085.16
1266.2	3040.11	1528.86	1269.51	2155.42	1541.81	1865.45	1552.1	1196.76	2306.68	1981.84	2276.58	1676.13	1349.18	1264.77	1545.87	2853.82	1863.81	1932.02	1936.87	2099	1579.2	2530.78	1367.03	2974.16	1729.76	2472.48	2113.49	1438.97	1779.26	2428.48	2181.21	1796.34	1523.88	1912.25	1782.57	1315.9	2517.85	2110.3	1620.6	1352.65	1516.52	2130.52	1518.13	1377.51	1414.72	1462.38	1957.87	1411.24	1079.77
1259.32	3028.05	1529.68	1291.07	2141.57	1524.83	1878.32	1546.72	1167.21	2279.65	1990.72	2273.04	1676.4	1359.35	1281.77	1554.15	2853.04	1861.5	1944.4	1917.46	2078.24	1567.63	2520	1374.84	2983.37	1709.42	2441.58	2096.96	1436.31	1748.82	2414.81	2189.81	1797.1	1516.63	1890.86	1782.59	1301.88	2539.05	2113.01	1617.76	1345.54	1512.13	2099.58	1507.15	1387.35	1431.43	1485.72	1959.25	1411.49	1087.96
1266.02	3056.08	1529.62	1311.53	2124.97	1521.34	1881.21	1549.94	1142.73	2271.5	1989.92	2283.06	1658.82	1364.82	1276.58	1550.88	2866.66	1849.97	1931.46	1907.72	2075.62	1570.14	2506.62	1354.2	2987.85	1708.22	2434.21	2091.16	1457.36	1751.17	2401.92	2180.55	1802.65	1522.28	1896.97	1776.68	1314.04	2538.44	2089	1638.6	1354.17	1501.12	2084.6	1503.59	1404.86	1409.82	1496.22	1982.18	1395.08	1075.48
1279.1	3020.78	1535.55	1329.01	2108.43	1516.05	1879.03	1542.73	1137.37	2256.96	1994.19	2269.06	1654.26	1339.5	1279.46	1541.21	2866	1850.5	1948.48	1879.48	2059.87	1567.05	2504.12	1357.93	2976.09	1695.98	2437.13	2085.97	1452.08	1720.86	2400.98	2195.22	1787.68	1526.93	1885.94	1777.1	1320.91	2550.88	2090.87	1646.34	1351.04	1495.8	2071.44	1507.46	1420.84	1395.07	1492.07	1968.22	1401.53	1073.3
1282.82	3022.65	1531.3	1350.49	2115.95	1515.75	1882.1	1525.65	1104.29	2248.98	1989.45	2257.22	1660.47	1346.63	1281.65	1543.03	2847.51	1846.21	1948.53	1887.1	2049.84	1560.92	2485.63	1354.3	2979.91	1710.76	2427.75	2068.11	1466.19	1722.21	2412.2	2191.85	1798.9	1536.22	1881.56	1797.21	1306.46	2552.64	2096.67	1665.72	1356.7	1496.75	2072.28	1512.94	1411.52	1379.17	1501.2	1980.98	1389.91	1056.08
1285.61	3019.94	1533.83	1381.01	2088.68	1527.9	1878.59	1535.23	1101.85	2225.7	1986.75	2251.71	1668.51	1350.18	1291.19	1544.05	2842.36	1837.51	1935.24	1875.39	2035.39	1556.37	2481.2	1342.65	2991.64	1714.77	2441.65	2057.64	1465.83	1719.42	2402.1	2169.88	1803.19	1527.39	1857.28	1796.61	1306.97	2546.38	2095.84	1605.46	1353.93	1492.6	2064.99	1516.66	1428.86	1375.16	1510.4	1994.85	1375.54	1064.93
1287.03	3024.51	1537.64	1390.7	2086.28	1527.67	1877.49	1541.45	1086.18	2235.16	2000.36	2250.98	1666.21	1369.05	1280.24	1551.37	2836.52	1831.45	1921.36	1857.55	2031.99	1554.32	2484.06	1352.86	2985.66	1712.8	2424.89	2038.37	1476.75	1705.59	2406.88	2182.62	1796.5	1537.17	1852.54	1796.96	1314.46	2541.71	2079.24	1600.84	1364.59	1500.36	2059.64	1535.77	1427	1385.38	1513.54	1991.89	1389.26	1074.38
1294.5	3030.1	1543.19	1410.48	2095.12	1539.23	1872.34	1549.51	1069.92	2219.52	2000.75	2245.54	1673.06	1331.98	1279.81	1549.41	2826.86	1850.82	1938.98	1875.13	2038.13	1559.53	2480.68	1354.13	2958.21	1706.41	2435.77	2052.47	1494.51	1714.65	2398.15	2174.6	1813.04	1542.34	1848	1799.64	1314.51	2541.64	2080.33	1594.95	1350.08	1499.14	2061.11	1533.08	1436.22	1386.4	1530.03	1995.99	1374.2	1093.84
1304.9	3024.51	1544.86	1423.53	2090.35	1538.18	1881.13	1530.96	1069.35	2225.21	2014.09	2259.86	1660.45	1354.21	1295.51	1556.81	2820.25	1841.26	1945.88	1878.46	2031.71	1553.11	2483.85	1351.7	2943.02	1740.46	2428.38	2042.11	1500.63	1701.97	2413.14	2176.82	1810.78	1538.48	1839.14	1802.08	1311.27	2527.63	2092.9	1623.44	1354.79	1502.96	2045.61	1547.05	1450.25	1392.43	1544.71	1988.17	1380.67	1080.66
1307.5	3027.76	1558.84	1441.54	2109.95	1536.96	1896.65	1538.92	1038.81	2223.24	2013.5	2262.45	1681.53	1367.44	1291.75	1556.47	2807.24	1844.69	1947.2	1877.54	2036.99	1556.85	2467.82	1365.22	2951.7	1733.1	2436.12	2056.13	1509.04	1695.65	2409.89	2170.26	1817.7	1553.26	1831.93	1798.28	1317.74	2519.53	2094.09	1661.61	1373.47	1513.15	2057.91	1574.88	1462.6	1414.91	1560.24	2010.76	1377.16	1083.16
1325.67	3023.7	1562.12	1459.91	2104.32	1525.4	1889.72	1557.38	1047.84	2229.11	2016.38	2248.75	1667.22	1348.9	1291.72	1556.06	2810.78	1859.89	1933.08	1892.4	2061.39	1547.89	2452.63	1366.28	2953.26	1738.55	2432.79	2053.86	1521.97	1699.73	2391.73	2168.14	1824.13	1551.3	1844.2	1803.43	1305.19	2512.35	2084.28	1671.13	1372.41	1515.2	2062.9	1572.58	1466.26	1395.71	1554.54	2000.96	1368.23	1105.03
1301.43	3028.6	1561.77	1479.43	2124.34	1542.28	1857.12	1567.39	1038.71	2238.41	2017.11	2261.47	1653.99	1346.09	1288.58	1550.33	2809.42	1853.99	1913.37	1886.23	2060.81	1557.23	2462.43	1373.38	2967.55	1743.73	2432.18	2048.8	1511.77	1696.33	2401.93	2185.53	1813.74	1557.93	1837.61	1806.19	1315.17	2511	2102.67	1692.84	1356.74	1501.44	2052.28	1593.1	1486.3	1423.75	1565.05	2012.1	1383.27	1113.57
1305.93	3028.69	1573.56	1491.6	2137.38	1546.14	1839.29	1582.81	1034.61	2230.81	2026.61	2258.53	1667.24	1371.3	1291.21	1555.82	2809.46	1854.51	1927.31	1882.7	2065.94	1546.21	2443.2	1372.15	2968.95	1753.69	2421	2058.85	1523.45	1693.06	2399.8	2197.6	1815.51	1565.1	1861.46	1789.01	1306.53	2513.86	2104.91	1682.6	1375.87	1531.42	2066.12	1608.24	1484.19	1421.4	1551.55	1986.7	1375.04	1132.29
1337.68	3029.02	1573.08	1498.8	2145.94	1533.72	1831.13	1589.98	1039.29	2243.5	2037	2262.11	1669.91	1376.71	1305.06	1565.1	2811.12	1865.3	1926.51	1874.07	2066.19	1541.24	2450.63	1387.83	2988.79	1760.93	2427.88	2061.87	1528.18	1687	2394.25	2180	1806.93	1576.16	1860.64	1787.62	1316.3	2513.2	2100.45	1690.72	1381.05	1524.59	2076.79	1627	1496.56	1433.57	1558.27	1974.41	1365.6	1151.03
1326.35	3023.68	1578.94	1506.51	2147.44	1551.11	1834.65	1613.99	1053.66	2227.89	2034.38	2268.78	1683.98	1357.21	1286.27	1571.79	2820.27	1860.92	1939.96	1903.77	2081.02	1548.42	2448.64	1389.16	2980.42	1753.49	2434.49	2056.41	1543.55	1703.28	2400.29	2178.87	1804.05	1587.68	1874.32	1783.54	1327.65	2527.58	2119.76	1664.93	1376.88	1521.64	2082.75	1655.47	1514.07	1429.16	1545.81	1977.08	1363.59	1143.72
1306.78	3014.3	1570.94	1519.02	2163.74	1541.79	1844.52	1643.96	1042.19	2239.49	2045.3	2263.43	1679.99	1358.99	1297.62	1576.41	2813.45	1881.6	1926.16	1923.16	2088.52	1542.48	2457.99	1404.1	2993.54	1777.81	2436.43	2076.88	1547.58	1708.93	2409.01	2194.55	1815.18	1591.73	1868.97	1781.48	1324.3	2512.34	2110.91	1668.3	1380.44	1537.16	2081.96	1666.37	1528.27	1439.76	1563.65	1974.09	1357.19	1182.76
1295.89	3014.01	1584.84	1523.41	2155.96	1549.49	1851.76	1654.52	1047.64	2251.5	2034.77	2274.19	1670.87	1363.14	1287.32	1593.86	2800.79	1868.09	1922.3	3147.72	2094.36	1534.77	2478.57	1388.53	3018.52	1781.41	2443.27	2083.08	1548.22	1690.44	2400.57	2191.27	1813.17	1596.52	1876.8	1782.52	1337.18	2521.13	2124.68	1668.01	1372	1524.94	2091.35	1674.56	1534.67	1431.84	1553.43	1962.55	1368.15	1169.07
1269.99	3029.99	1575.34	1548.08	2189.66	1583.07	1871.04	1690.37	1052.01	2254.37	2049.22	2272.16	1690.64	1366.59	1294.2	1570.02	2822.23	1867.29	1920.42	1928.98	2089.87	1551.73	2495.58	1414.96	2999.12	1772.16	2444.58	2093.4	1572.38	1709.37	2424.57	2186.52	1808.87	1587.81	1861.06	1776.11	1325.1	2511.7	2115.98	1674.44	1362.58	1551.96	2079.64	1691.99	1538.54	1445.07	1550.31	1957.56	1368.29	1191.3
1270.24	3023.15	1580.57	1550.26	2191.21	1551.47	1866.59	1692.5	1053.42	2252.66	2047.12	2284.28	1693.38	1353.26	1300.37	1603.31	2827.42	1875.33	1915.32	1924.98	2094.74	1549.89	2519.55	1398.78	2978.13	1780.27	2442.74	2091.99	1576.55	1710.9	2419.62	2202.01	1808.92	1600.85	1882.78	1784.89	1326.58	2521.82	2118.06	1678.38	1364.51	1550.68	2082.15	1705.08	1549.07	1424.62	1550.08	1967.37	1367.53	1197.99
1270.36	3027.25	1586.08	1553.76	2222.16	1560.95	1887.01	1712.59	1074.12	2248.07	2058.28	2295.95	1678.48	1331.79	1294.5	1597.76	2833.84	1881.6	1918.22	1941.98	2110.53	1563.08	2513.34	1404.93	2981.73	1790.69	2453.48	2078.72	1581.6	1711.56	2420.31	2221.94	1819.78	1588.72	1879.11	1771.7	1337.79	2504.36	2121.92	1688.95	1357.6	1540.1	2082.17	1704.05	1542.54	1434.06	1544.67	1964.56	1365.42	1207.4
1260.23	3036.67	1571.7	1556.81	2222.96	1545.47	1882.74	1726.75	1078.41	2258.75	2062.77	2274.61	1691.82	1326.98	1281.87	1606.59	2825.76	1885.85	1926.24	1951.18	2115.82	1549.2	2521.72	1410.94	2979.78	1805.95	2452.73	2089.39	1581.16	1717.89	2419.71	2238.95	1821.98	1583.23	1882.31	1771.42	1345.35	2518	2126.83	1719.58	1367.99	1555.6	2087.58	1714.73	1549.02	1420.62	1553.74	1956.68	1360.15	1207
1272.14	3029.07	1576.62	1576.85	2211.46	1552.44	1883.37	1740.95	1093.23	2275.22	2044.3	2274.34	1701.89	1331.43	1282.72	1610.7	2844.37	1877.2	1919.99	1964.97	2116.05	1548.13	2536.1	1414.15	2995.39	1801.07	2457.51	2084.74	1562.73	1706.95	2432.99	2259.93	1820.86	1582.07	1884.36	1757.95	1350.76	2529.04	2132.59	1709.89	1369.39	1600.71	2085.78	1742.76	1553.79	1433.38	1539.51	1966.06	1354.63	1218.07
1266.24	3034.72	1589.63	1562.08	2225.34	1555.64	1896.64	1755.99	1106.83	2265.28	2066.17	2304.84	1694.57	1349.18	1309.77	1606.7	2833.93	1886.31	1935.8	1976.12	2149.01	1551.92	2560.9	1411.87	2992.18	1797.18	2456.76	2095.55	1580.96	1723.72	2413.65	2239.32	1811.73	1594.77	1885.94	1778.21	1359.4	2510.91	2129.55	1681.97	1360.17	1605.97	2109.47	1753.86	1544.77	1431.36	1543.33	1960.73	1358.04	1223.97
1273.34	3046.81	1592.95	1568.18	2235.42	1556.43	1892.52	1768.2	1135.95	2274	2067.56	2287.62	1708.09	1325.28	1298.69	1619.69	2862.97	1890.39	1947.76	1958.02	2134.22	1556.05	2558.45	1396.24	2988.06	1821.38	2470.04	2076.81	1588.27	1727	2425.21	2245.35	1816.86	1604.26	1858.2	1781.28	1360.89	2515.22	2134.04	1720.58	1369.6	1595.39	2096.02	1755.48	1540.39	1435.49	1551.76	1971.08	1361.2	1217.06
1270.17	3056.19	1583.8	1579.95	2253.99	1553.25	1883.25	1774.02	1138.9	2267.21	2061.15	2311.08	1704.57	1320.25	1288.02	1624.14	2849.42	1888.76	1934.51	1981.02	2127.71	1567.23	2596.7	1410.12	2994.82	1819.52	2466.09	2085.47	1584.81	1722.58	2425.44	2264.36	1828.26	1585.89	1865.63	1793.8	1369.12	2517.15	2136.81	1720.04	1379.95	1622.78	2100.85	1770.11	1518.55	1428.66	1542.61	1990.56	1363.65	1233.12
1285.02	3061.06	1596.66	1563.81	2275.49	1564.55	1899.17	1789.27	1171.1	2263.41	2079.54	2300.27	1704.45	1340.15	1301.06	1623.67	2839.14	1868.54	1943.73	1966.58	2131	1568.75	2607.1	1397.69	2980.5	1830.79	2454.87	2072.9	1594.19	1744.92	2421.41	2274.18	1824.41	1585.16	1873.49	1792.66	1375.35	2506.76	2139.25	1727.78	1376.59	1636.35	2102.75	1756.13	1515.82	1438.64	1546.89	1972.07	1367.21	1238.61
1289.75	3082.74	1600.62	1562.48	2281.74	1557.62	1891.71	1803.25	1171.34	2276.53	2080.1	2302.46	1733.83	1336.13	1287.25	1628.08	2868.51	1887.76	1938.69	1977.06	2126.32	1552.78	2608.16	1411.06	2983.28	1835.44	2459.24	2085.19	1589.5	1733.01	2439.32	2275.61	1830.68	1587.34	1868.67	1783.77	1365.04	2516.14	2132.45	1726.28	1390.66	1652.66	2113.21	1788.43	1518.85	1435.86	1641.32	1988.69	1360.82	1255.61
1304.3	3078.8	1612.34	1568.08	2296.44	1556.77	1891.07	1792.88	1202.94	2282.97	2085.81	2309.08	1734.66	1335.67	1293.1	1640.87	2869.63	1895.62	1941.33	1978.89	2139.8	1564.74	2625.72	1422.37	2975.65	1830.39	2456.56	2090.16	1586.03	1762.47	2440.05	2297.33	1833.64	1582.94	1872.59	1795.68	1353.36	2527.57	2143.17	1701.52	1386.49	1649.84	2104.81	1762.68	1515.34	1434.16	1548.06	1971.7	1374.24	1248.65
1314.97	3078.49	1594.66	1568.84	2298.28	1544.17	1890.33	1783.53	1226.93	2296.8	2069.39	2289.12	1723.5	1336.67	1292.82	1628.85	2864.29	1892.57	1952.45	1987.23	2151.17	1553.79	2623.16	1430.4	2976.85	1827.22	2467.66	2098.82	1608.62	1757.67	2446.04	2307.14	1847.79	1596.71	1867.1	1796.25	1359.08	2506.35	2136.08	1710.88	1380.01	1666.29	2114.96	1772.91	1526.18	1427.62	1566.82	1960.19	1377.2	1236.33
1308.44	3090.29	1591.68	1567.55	2299.13	1565.71	1891.07	1784.65	1243.24	2268.87	2073.13	2300.55	1719.66	1327.05	1319.53	1638.54	2858.21	1891.39	1933.12	1989.31	2135.96	1549.06	2637.47	1439.84	2976.49	1826.63	2459.94	2078.46	1604.79	1764.37	2449.9	2311.35	1849.74	1602.27	1872.12	1798.61	1384.7	2506.86	2152.87	1723.4	1389.01	1680.49	2117.52	1764.95	1546.78	1432.65	1577.31	1982.78	1378.44	1210.16
1324.98	3098.63	1610.64	1562.73	2320.34	1543.1	1897.92	1775.9	1276.56	2276.22	2076.25	2292.27	1734.03	1365.37	1313.42	1651.64	2883.26	1899.01	1944.5	1998.42	2144.46	1554.6	2655.59	1421.26	2937.75	1819.41	2470.42	2110.34	1602.23	1773.8	2457.68	2306.55	1860.18	1580.13	1856.92	1803.07	1364.67	2504.76	2138.5	1730.34	1391.27	1685.72	2111.07	1773.25	1529.95	1422.84	1591.01	1986.77	1367.32	1238.41
1326.44	3113.83	1594.64	1555.72	2312.4	1538.43	1907.87	1779.83	1289.23	2309.09	2068.44	2303.47	1732.63	1407.32	1293.97	1669.03	2875.9	1905.44	1932.4	2001.23	2150.83	1553.69	2656.55	1425.19	2950.69	1846.79	2467.26	2078.12	1602.82	1797.39	2468.17	2314.07	1865.17	1589.76	1859.24	1811	1355.67	2515.19	2152.18	1729.39	1407.7	1699.1	2116.65	1766.9	1556.07	1417.41	1598.18	1973.34	1365.57	1227.4
1346.99	3097.78	1616.69	1571.8	2346.65	1542.08	1904.21	1768.74	1311.75	2316.31	2068.08	2312.24	1743.92	1403.43	1297.13	1654.81	2882.39	1899.94	1937.81	2008.92	2157.56	1567.68	2660.49	1434.48	2951.66	1833.41	2482.65	2112.52	1617.4	1804.29	2463.42	2340.58	1867.11	1595.69	1863.13	1804.6	1365.45	2502.44	2152.73	1730.7	1401.31	1697.62	2108.53	1764.58	1545.34	1420.61	1601.22	1996.82	1387.63	1226.96
1346.69	3117.57	1616.8	1572.29	2339.73	1631.02	1986.36	1805.13	1339.51	2328.71	2084.76	2308	1747.67	1423.22	1316.65	1663.82	2880.26	1913.75	1941.4	1997.25	2142.44	1561.08	2658.55	1430.25	2950.89	1841.26	2471.4	2104.25	1608.56	1812.46	2460.87	2347.4	1863.78	1610.52	1867.24	1808.39	1360.87	2515.87	2152.07	1727.05	1394.24	1697.41	2105.39	1768.23	1563.18	1416.36	1587.06	1987.88	1376.53	1228.64
1356.96	3136.46	1628.66	1584.14	2359.59	1540.9	1932.36	1766.66	1358.37	2328.23	2076.97	2314.94	1743.46	1431.08	1304.47	1657.78	2894.04	1915.16	1935.33	2022.18					3515.97					1819.27	2474.5	2341.17	1874.41	1608.21	1875.03	1806.75	1375.53	2521.59	2143.9	1739.1	1406.78	1702.41	2100.74	1755.67	1571.75	1425.33	1588.83	1990.05	1393.76	1242.08
1367.2	3136.75	1620.97	1577.86	2371.23	1552.33	1904.14	1761.26	1390.1	2318.49	2073.61	2334.14	1757.14	1438.83	1305.83	1668.08	2912.14	1912.8	1950.3	2007.42	2149.69	1581.24	2672.31	1435.07	2943.84	1836.33	2486	2107.3	1624.61	1838.84	2490.66	2380.94	1869.77	1619.87	1856.84	1793.3	1401.15	2512.13	2162.29	1753.29	1416.25	1706.62	2107.44	1743.24	1572.4	1421.09	1604.56	1979.23	1388.25	1224.39
1374.11	3109.31	1624.77	1562.25	2383.63	1539.39	1924.34	1779.98	1415.54	2327.38	2079.57	2323.29	1762.26	1425.45	1313.04	1652.55	2932.16	1917.07	1951.42	2042.45	2144.4	1566.27	2695.79	1439.53	2941.33	1846.95	2483.92	2103.54	1631.57					1601.83	1895.58	1805.28	1391.07	2507.9	2161.71	1757.56	1399.69	1710.99	2112.29	1739.24	1565.97	1420.77	1584.15	1988.75	1390.72	1231.32
1380.11	3149.86	1637.79	1585.72	2381.9	1546.11	1937.9	1776.6	1438.74	2310.58	2089.21	2321.3	1766.82	1440.26	1319.37	1675.55	2933.56	1932.39	1965.14	2031.21	2130.49	1584.11	2697.54	1431.96	2946.16	1874.08	2492.07	2080.97	1638.09	1862.35	2491.03	2385.26	1876.93	1622.63	1883.89	1822.35	1424.48	2514.95	2163.06	1765.11	1409.59	1704.58	2115.95	1735.68	1571.57	1440.2	1593.48	1999.86	1386.52	1236.74
1369.87	3174.65	1632.29	1583.06	2369.4	1544.68	1919.85	1781.22	1448.19	2324.74	2090.04	2334.41	1768.09	1425.21	1322.84	1661.83	2934.64	1927.74	1975.42	2028.79	2148.72	1590.05	2715.45	1437.3	2948.08	1844.42	2506.64	2097.72	1645.3	1870.66	2499.1	2388.41	1903.14	1638.26	1878.19	1808.24	1414.36	2518.46	2162.95	1737.38	1407.1	1696.36	2111.67	1746.84	1570.14	1426.43	1590.95	1982.17	1391.56	1243.77
1371.9	3145.1	1633.58	1596.28	2407.5	1558.57	1930.7	1780.64	3440.97	2328.8	2084.65	2333.28	1772.56	1417.83	1334.18	1684.73	2922.84	1931.26	1968.16	2025.73	2157.27	1603.49	2738.57	1446.93	2986.29	1853.1	2512.85	2072.74	1655.22	1888.68	2500.91	2385.6	1886.74	1619.17	1883.94	1803.33	1418.34	2518.91	2187.84	1759.29	1430.24	1689.59	2123.3	1751.23	1565.29	1424.74	1592.26	2008.58	1397.55	1240.35
1386.53	3168.8	1628.72	1584.44	2401.27	1551.6	1938.99	1797.27	1487.01	2333.58	2098.69	2323.1	1769.51	1412.81	1338.42	1694.72	2937.8	1925.06	1961.5	2052.62	2149.89	1596.93	2718.56	1446.55	2991.32	1854.07	2507.53	2071.54	1648.82	1893.74	2501.64	2393.64	1901.8	1602.89	1895.6	1807.32	1432.36	2509.77	2164.68	1759.65	1419.19	1678.23	2114.65	1759.01	1570.73	1442.16	1592.83	2002.33	1383.37	1235.9
1376.96	3177.06	1639.05	1590.81	2413.62	1567.89	1935.64	1769.82	3148.89	2347.83	2104.91	2330.78	1781.26	1418.7	1325.92	1676.29	2938.66	1921.54	1969.07	2036.02	2147.43	1602.41	2722.35	1444.09	2974.29	1855.29	2515.1	2085.63	1663.5	1903.61	2504.96	2419	1895.95	1624.29	1893.13	1800.08	1432.17	2520.51	2162.3	1760.18	1426.78	1676.36	2126.68	1752.5	1577.46	1418.16	1616.85	2017.87	1396.53	1238.98
1395.92	3189.88	1641.26	1601.87	2430.13	1566.42	1945.52	1776.11	1517.1	2324.46	2107.59	2344.85	1776.39	1434.3	1343.97	1688.83	2948.58	1937.57	1979.61	2056.69	2143.32	1618.42	2726.25	1450.32	2975.95	1857.61	2531.05	2092.8	1660.86	1910.36	2514.45	2420.16	1909.97	1621.73	1892.14	1799.11	1442.35	2526.91	2172.32	1762.83	1416.14	1672.38	2128.13	1753.02	1570.29	1428.32	1610.08	2007.46	1400.67	1251.22
1379.79	3188.61	1642.18	1616.51	2413.84	1568.01	1952.21	1787.66	1523.42	2357.84	2104.37	2355.22	1794.28	1429.38	1326.01	1685.15	2944.03	1932.32	1975.99	2029.42	2143.9	1630.58	2719.13	1459.13	2994.28	1863.3	2540.68	2104.04	1658.93	1916.74	2504.39	2416.27	1911.26	1621.96	1891.31	1795.74	1453.89	2528.15	2175.1	1755.3	1431.42	1678.08	2130.26	1760.56	1569.21	1428.82	1604.01	2032.12	1393.57	1252.48
1394.76	3183.7	1652.1	1622.2	2431.12	1574.02	1946.01	1787.1	1541.02	2341.63	2115.33	2338.01	1757.62	1437.23	1339.28	1698.32	2949.15	1934.37	1970.68	2043.09	2145.4	1608.58	2706.73	1462.4	2992.85	1862.76	2550.49	2123.17	1653.46	1930.43	2523.98	2421.57	1907.03	1620.01	1885.31	1799.58	1462.65	2545.18	2183.9	1761.56	1433.11	1678.93	2134.55	1757.59	1569.07	1439.41	1597.89	2038.81	1416.98	1255.22
1377.05	3189.73	1659.9	1612.25	2422.41	1588.31	1955.09	1782.42	1557.67	2347.53	2117.53	2362.31	1781.36	1418.87	1339.57	1686.99	2925.26	1944.7	1981.23	2058.85	2151.71	1604.71	2718.32	1474.69	3004.74	1859.21	2552.15	2127.71	1666.41	1953.17	2519.36	2437.09	1904.48	1624.36	1885.98	1788.54	1466.4	2534.04	2197.54	1781.65	1430.43	1664.83	2134.37	1772.54	1568.7	1428.01	1611.79	2027.88	1408.47	1247.14
1374.11	3182.63	1670.83	1612.35	2441.93	1566.38	1971.18	1796.78	1573.84	2372.77	2114.07	2339.52	1778.78	1422.62	1330.52	1694.66	2936.52	1951.31	1980.83	2058.45	2168.82	1622.16	2715.14	1461.76	3007.52	1867.93	2536.88	2122.92	1668.8	1957.63	2526.72	2452.26	1911.98	1640.53	1892.47	1812.69	1481.3	2539.89	2193.21	1772.47	1429.04	1665.92	2135.05	1754.75	1585.35	1439.54	1611.13	2014.13	1395.55	1262.08
1362.5	3205.53	1670.7	1622.14	2454.67	1591.63	1973.98	1810.41	1577.16	2373.12	2117.7	2373.87	1772.67	1460.9	1347.64	1707.13	2949.94	1954.32	1995.72	2053.34	2125.9	1632.81	2739.7	1452.38	3004.11	1867.68	2561.08	2113.41	1672.24	1961.2	2525.71	2459.86	1895.98	1624.02	1894.73	1802.15	1489.87	2547.75	2192.19	1755.45	1426.33	1667.38	2140.79	1773.21	1575.92	1469.43	1621.79	2022.58	1401.98	1260.19
1380.1	3196.03	1670.44	1632.71	2456.2	1579.51	1979.61	1820.67	1574.39	2361.71	2124.86	2378.46	1791.39	1445.79	1329.98	1679.97	2941.78	1959.31	2002.75	2059.5	2139.04	1661.9	2723.95	1475.97	2993.69	1864.89	2564.18	2129.89	1669.03	1966.02	2535.65	2454.01	1904.97	1646.09	1918.58	1811.17	1487.41	2544.93	2182.98	1758.39	1417.42	1672.27	2146.99	1770.26	1585.5	1444.26	1619	2028.75	1410.44	1249.64
1374.44	3193.37	1669.65	1643.14	2471.72	1590.18	1982.54	1819.8	4029.37	2354.99	2131.68	2362.44	1795.79	1458.19	1346.81	1684.63	2955.83	1952.01	2004.11	2056.24	2153.71	1663.78	2744.08	1484.68	3035.57	1870.9	2568.94	2141.03	1678.65	1956.16	2527.64	2465.18	1898.15	1642.95	1921.4	1814.71	1483.78	2530.21	2197.64	1793.77	1431.8	1687.04	2150.75	1770.76	1603.37	1450.48	1629.46	2030.5	1403.08	1258.75
1387.38	3215.63	1674.76	1635.84	2476.35	1592.01	1986.6	1811.53	1606.24	2372.69	2122.4	2375.3	1799.39	1466.64	1350.67	1687.89	2959.84	1958.38	2021.53	2067.86	2148.93	1662.58	2720.57	1472.51	3007.71	1884.99	2575.94	2139.03	1682.37	1978.73	2522.3	2494.76	1896.41	1641.51	1923.65	1822.96	1464.1	2553.48	2200.44	1738.77	1425.86	1666.37	2135.36	1773.39	1590.35	1445.27	1620.5	2048.14	1404.16	1245.62
1376.32	3214.79	1670.1	1631.79	2466.27	1579.07	1985.72	1806.78	1609.31	2366.87	2119.34	2373.86	1795.63	1457.71	1347.37	1700.85	2960.55	1939.18	2035.42	2071.06	2158.95	1677.32	2718.33	1473.76	3028.81	1880.65	2582.51	2120.53	1689.89	1989.63	2540.99	2485.51	1898.24	1662.77	1928.83	1810.46	1488.3	2566.1	2186.61	1722.92	1442.9	1675.88	2150.38	1779.89	1590.73	1440.46	1619.07	2056.38	1416.22	1261.06
1376.95	3213.49	1660.22	1643.36	2496.78	1591.1	1980.53	1807.35	1613.49	2368.01	2137.71	2374.86	1793.44	1446.93	1335.88	1702.07	2967.71	1961.41	2018.83	2065.38	2170.19	1686.54	2734.05	1477.98	2999.33	1874.04	2581.06	2124.71	1687.52	1990.61	2524.95	2513.82	1920.9	1650.02	1911.3	1810.63	1478.71	2562.04	2200.83	1725.68	1438.42	1676.19	2154.4	1776.82	1599.48	1455.71	1628.21	2041.69	1412.69	1255.63
[truncated: 67 more columns]

## Sheet: A
1	1	1	1	1	3	3	3	4	5	5	5	5	5	5	5	5	5	5	2	3	3	3	3	3	3	3	3	3	5	5	5	5	2	2	2	2	3	3	3	3	4	4	4	4	4	4	6	6	6
1	2	5	6	7	2	3	10	2	1	2	3	4	7	10	11	12	14	15	2	1	2	3	4	5	6	7	8	9	1	2	5	7	1	2	3	12	1	2	3	6	1	3	4	5	7	13	2	3	5
47.011	88.925	58.66	77.381	110.247	101.094	85.181	63.86	79.149	141.24	119.191	80.085	97.246	65.94	79.981	59.388	88.717	146.545	33.49	94.438	54.187	65.836	90.589	73.428	46.387	95.166	141.761	73.324	77.485	71.556	143.945	100.054	91.421	66.044	94.854	32.242	75.613	102.758	173.69	76.029	52.523	74.78	98.91	88.301	83.101	112.639	117.215	91.317	27.874	75.405
79.461	125.328	109.103	142.073	173.794	125.328	153.409	119.919	124.912	184.715	179.931	95.166	129.176	141.136	138.744	110.039	111.495	171.714	46.491	164.642	93.19		130.424	116.695		124.808	182.011	125.224	122.727	99.326	201.876	101.718	140.512	146.961	156.529	70.204	107.438	206.036	236.302	109.935	75.301	156.321	127.512		112.951	144.777	141.136	137.912	60.116	102.654
107.854	139.992	126.888	209.261	215.709	147.169	234.014	203.748	187.731		199.796	119.503	176.083	169.738		142.073			53.043	250.863	117.527	90.485		163.602	68.228	158.194	209.781	209.469	211.341	144.153	261.888	142.697	196.884	261.472	222.781	83.829	136.976	358.406	291.113	125.848	86.741	201.252	205.62	113.367	148.625	234.43	173.378	172.13	94.334	133.024
141.24	143.425	195.948	258.248	249.511	149.041	262.72	215.813	282.793	222.781	302.45	205.828	274.681	207.492	160.482	232.766	151.953	326.58	92.878			95.998	162.978			187.939	273.016	241.607	281.857	177.123	391.376	213.317				116.279	130.736		412.697	180.243	93.086		271.872				272.184	205.308	111.807
188.771	239.942	250.863	343.117	303.178	210.093	288.929		352.477			258.768		230.27		281.337	168.074		128.136	265.84	187.731			199.484	72.076							318.259	271.144	274.056	330.116	134.064	154.449	426.114				262.2		158.61	202.708	313.475	293.714	251.799	158.714	151.745
232.35					270.936		237.758		336.148	344.261		308.899	227.774	161.522		216.541	364.542	213.837		224.341	113.263	166.098			300.162		319.403	303.49	206.868	437.658						181.699		422.473	245.143	122.103		308.275				313.267	300.682	199.692	198.34
308.795	267.296	292.986	355.389	355.077		379.103		365.478			312.435		295.794		312.019				261.264	292.986			215.501	74.468		354.661					348.213	356.845	302.346	380.871	178.579		472.396			155.385	300.682				373.486				232.766
					302.138				373.902	345.613		312.331		187.835		254.399	417.377	316.491			152.473				396.056		414.777	337.708	221.221	532.408						255.439		451.283	330.428			374.735	263.552	261.68		326.996	343.325	243.583
	305.466	371.718	423.929	388.567		416.129	274.16	374.527			382.743		300.786		345.925				316.491	407.184			274.577	90.381		419.249					376.087	388.879	308.275	425.802	201.044		489.557			210.197	329.908				389.919				268.128
					352.061				408.641	370.574		366.31		185.443		329.18	454.091	339.684			148.105	352.269			417.273		461.268	402.296	243.999	540.728						227.254		463.868	358.926			401.776	281.857	306.506		363.606	368.598	316.387
364.854	377.335	403.44	444.419	402.4		450.347	298.602	372.654			410.929		317.323		368.494				295.898	426.842		349.357	313.163	95.998		439.114					394.288	468.756	333.132	467.3	322.003		518.263			239.942	370.054				432.77				271.976
																																								277.801
																													344.989					494.55
405.416	418.729	424.97	525.024	489.453	443.379	497.566	344.365	368.494	507.759	447.539	477.597	423.409	365.478	270.52	439.218	409.577	573.49	374.11	377.127	554.249		401.568	388.255	119.919	612.389	487.893	589.923	597.828		662.832	422.161	601.988	414.881	502.87	366.414	274.577	615.925	529.496	446.915	330.532	394.808	461.788	307.338	362.15	502.454	477.805	418.313	345.613	341.14
																					309.107
458.564	611.765	489.349	625.806	560.698	530.12	551.337	419.769	380.767	655.031	515.871	524.712	484.565	445.979	363.502	512.127	432.874	661.272	414.153	442.131	649.311		428.09	493.198		781.399	591.172	664.392	742.085	406.144	723.259	440.362	749.365	487.997	557.474	444.939	354.765	652.119	594.292	535.216	430.69	421.433	531.784	336.356	445.979	536.776	598.452	503.806	361.422	361.526
503.182	838.706	531.68	733.452	699.338	607.501	583.995	555.913	374.527	811.561	513.687	581.395	558.098	440.57	405.208	712.859	521.383	748.637	509.631	531.576	844.843	321.587	623.309	618.421	561.53	951.865	689.457	793.568	917.543	464.076	816.865	403.856	917.647	566.834	645.775	535.008	434.33	707.763	718.059	639.326	555.497	477.285	699.65	515.247	643.487	577.339	736.676	602.82	425.906	400.424
516.807	1021.03	571.722	805.944	835.898	675.833	637.662	674.377	415.089	981.195	490.077	741.253	554.457	440.778	422.577	735.532	568.394	761.118	616.757	572.45	904.23	338.852	783.375	607.397	790.656	982.131	811.457	772.246	965.906	443.483	936.264	379.415	949.057	643.175	665.848	612.805	460.124	774.951	734.492	693.826	599.492	503.286	774.743	698.298	701.834	589.819	779.007	704.33	479.781	413.945
486.021	1178.08	595.436	818.217	992.532	691.226	681.657	726.588	559.45	1062.22	589.403	759.558	554.457	478.637	403.024	737.82	590.547	810.209	611.245	624.038	912.655	360.694	936.576	601.78	1042.25	922.015	912.863	790.239	960.602	405.52	875.629	375.255	949.369	624.142	697.362	623.725	477.493	797.728	736.572	696.634	613.533	546.033	802.824	791.488	780.255	593.564	745.309	748.117	518.263	399.072
493.926	1188.58	586.803	799.08	1089.67	702.666	745.413	750.197	733.66	1136.06	682.905	894.038	586.491	493.406	494.134	716.707	620.501	777.239	504.95	620.397	992.532	483.213	1011.67	609.997	1090.82	952.177	903.19	734.908	940.737	415.193	843.803	366.726	946.249	675.625	681.241	662.624	484.461	843.283	745.517	651.079	633.398	627.262	783.999	838.81	747.701	561.946	740.42	750.509	496.838	444.211
[truncated: 10 more columns]
