# Supplementary material for: A mechano-osmotic feedback couples cell volume to the rate of cell deformation
Source: eLife journal article supplement (doi:10.7554/elife.72381), 2022-04-13
Supplement: supp [file motile and non motile.xlsx]

## Sheet: less than 1um per min
	7	7	7	7	7	7	7	7	7	7	7	8	8	8	8	8	8	8	8	8	8	8	8	8		7	7	7	7	7	7	7	7	7	7	7	8	8	8	8	8	8	8	8	8	8	8	8	8
	1	5	6	9	10	12	13	15	17	18	19	1	5	6	7	8	9	10	13	14	19	20	21	24		1	5	6	9	10	12	13	15	17	18	19	1	5	6	7	8	9	10	13	14	19	20	21	24
1	480.398	333.483	358.963	328.766	326.107	614.43	530.044	436.834	728.7	382.965	418.393	452.756	336.656	512.969	294.202	333.411	535.296	424.719	702.784	525.776	424.481	630.547	490.656	585.142
2	477.257	340.389	378.85	328.568	354.157	639.973	549.096	433.521	732.158	366.245	444.748	459.654	350.467	536.36	296.056	322.664	550.865	433.574	739.857	502.638	442.425	655.457	497.094	577.49
3	482.251	338.817	361.772	334.501	332.61	629.879	541.614	439.323	742.017	389.845	453.518	454.819	337.493	534.354	325.175	337.29	550.864	449.356	733.355	519.753	449.15	638.609	482.774	571.605
4	494.217	312.149	372.841	348.727	358.756	664.652	536.74	429.884	738.365	399.499	468.244	464.121	350.575	538.411	318.043	332.688	554.987	454.428	740.388	517.647	436.86	660.408	459.603	587.863
5	492.148	322.961	372.275	331.715	355.989	661.017	549.335	439.927	757.348	404.509	456.427	478.084	346.625	534.851	335.562	345.539	572.338	472.093	738.103	532.489	459.699	638.936	466.297	582.012
6	499.01	328.804	379.442	342.187	360.994	649.461	565.055	455.558	771.476	415.305	468.597	472.598	365.027	532.486	327.948	342.722	587.513	453.326	761.66	516.42	464.803	647.805	488.425	565.802
7	469.394	332.699	387.735	357.965	365.397	633.912	549.079	452.629	775.994	399.004	470.76	476.1	356.622	546.698	335.734	345.251	590.532	459.802	753.154	502.955	447.762	642.752	454.669	605.072
8	503.152	335.237	391.954	339.783	364.121	633.827	546.541	479.594	763.416	415.403	472.83	499.248	361.024	564.494	341	344.696	583.644	444.036	749.519	525.2	470.136	653.175	480.769	568.086
9	501.754	330.935	391.18	321.385	357.433	641.869	560.259	474.611	789.908	412.997	481.689	487.44	346.703	569.92	329.621	334.11	579.182	477.233	757.644	508.742	479.61	634.361	481.891	590.401
10	528.466	317.413	406.011	332.156	371.759	635.129	580.947	467.952	769.955	423.183	466.781	490.617	353.575	585.571	346.904	349.65	595.307	474.005	752.608	523.921	475.088	645.095	482.522	579.453
11	531.025	322.912	386.021	336.819	369.327	640.477	566.561	467.954	771.639	421.315	474.673	510.27	356.35	606.994	343.939	338.947	594.306	491.305	772.062	526.256	471.507	635.469	504.67	593.383
12	536.296	325.503	407.992	340.964	369.862	646.139	586.5	476.556	788.599	428.055	468.15	496.805	372.583	589.989	356.434	345.211	581.789	488.179	760.121	526.765	476.278	645.369	491.2	604.779
13	549.216	332.983	399.124	343.402	380.922	644.801	576.019	464.275	769.835	429.888	483.74	488.558	349.882	597.631	360.344	346.293	586.7	465.281	760.541	515.916	502.004	653.739	494.447	602.502
14	556.517	335.486	415.29	354.05	390.475	651.448	569.226	489.772	782.482	419.499	470.9	493.105	341.618	598.71	353.842	349.911	607.104	505.444	762.644	517.673	504.266	675	496.433	619.212
15	573.799	329.28	420.174	351.762	391.576	668.83	565.29	476.087	808.591	433.679	488.429	488.175	346.852	586.872	352.534	366.048	596.844	489.535	775.676	519.642	515.931	677.73	499.994	612.572
16	572.499	357.164	410.266	349.119	380.48	662.642	588.714	499.959	823.448	436.643	450.899	511.829	358.948	573.061	376.172	355.208	594.91	486.104	788.34	525.227	506.409	702.358	501.49	612.832
17	566.031	347.957	414.517	345.605	396.951	660.167	584.121	499.647	830.947	427.356	466.373	507.463	364.534	594.584	358.544	356.645	589.062	484.795	796.433	525.739	502.088	695.772	507.649	582.027
18	565.595	369.669	404.088	362.342	397.206	640.575	587.819	501.133	845.139	426.126	461.545	524.812	354.704	582.935	376.847	345.796	599.585	478.161	791.141	510.778	515.103	687.883	510.492	606.324
19	565.774	356.233	432.168	353.437	377.993	659.888	579.768	506.172	831.091	425.263	470.295	517.062	361.094	598.367	362.693	361.444	611.629	484.653	804.886	531.336	529.532	674.698	523.018	600.58
20	575.984	357.57	422.632	370.706	378.738	658.357	577.174	504.829	818.387	434.018	460.167	523.272	369.904	570.513	367.394	371.491	599.009	472.318	809.563	534.472	544.034	676.131	512.386	592.06		100	100	100	100	100	100	100	100	100	100	100	100	100	100	100	100	100	100	100	100	100	100	100	100
21	570.132	390.289	434.679	367.891	376.874	655.444	594.151	494.925	793.479	436.59	463.819	518.826	359.607	573.502	370.912	377.486	587.023	489.401	814.213	550.218	539.316	698.105	514.063	617.973		98.984	109.15	102.851	99.2405	99.5078	99.5575	102.941	98.0383	96.9565	100.593	100.794	99.1503	97.2163	100.524	100.958	101.614	97.999	103.617	100.574	102.946	99.1329	103.25	100.327	104.377
22	580.74	399.215	416.028	345.353	378.525	647.102	605.842	504.357	794.04	423.487	473.042	517.628	340.306	577.783	392.618	377.58	595.981	488.974	817.305	552.664	517.131	688.615	522.233	584.209		100.826	111.647	98.4374	93.1608	99.9438	98.2904	104.967	99.9065	97.025	97.5737	102.798	98.9214	91.9986	101.274	106.866	101.639	99.4946	103.526	100.956	103.404	95.0549	101.846	101.922	98.6738
23	578.847	381.233	412.408	369.449	375.842	656.886	607.497	508.068	801.049	426.809	449.839	515.497	351.26	570.216	378.626	385.427	614.056	472.008	820.885	535.247	523.622	675.199	520.834	600.031		100.497	106.618	97.581	99.6608	99.2354	99.7766	105.254	100.642	97.8815	98.3392	97.7556	98.5142	94.9599	99.9479	103.057	103.751	102.512	99.9343	101.399	100.145	96.2481	99.8621	101.649	101.346
24	590.534	386.354	419.554	364.664	389.786	654.525	609.364	530.294	815.208	416.862	450.573	519.254	346.625	576.659	366.783	360.719	595.853	476.661	828.407	547.485	564.65	659.469	506.058	583.145		102.526	108.05	99.2718	98.3701	102.917	99.4179	105.577	105.044	99.6116	96.0473	97.9151	99.2321	93.7067	101.077	99.8337	97.1004	99.4731	100.92	102.328	102.435	103.789	97.5356	98.765	98.4942
25	591.242	388.293	431.038	345.705	375.043	665.788	610.894	517.679	818.498	404.038	459.346	532.401	354.176	588.418	373.38	401.701	605.397	467.148	807.439	533.384	542.696	680.525	523.085	583.528		102.649	108.592	101.989	93.2557	99.0244	101.129	105.842	102.545	100.014	93.0925	99.8215	101.745	95.7482	103.138	101.629	108.132	101.066	98.9053	99.7376	99.7964	99.754	100.65	102.088	98.5588
26	579.319	386.917	423.741	356.391	364.253	671.827	602.407	515.6	828.947	398.19	486.207	504.667	356.614	575.886	376.084	404.577	613.337	483.184	829.934	527.279	522.04	679.246	526.184	589.003		100.579	108.207	100.262	96.1383	96.1755	102.046	104.372	102.134	101.29	91.7451	105.659	96.4445	96.4073	100.942	102.366	108.906	102.392	102.3	102.516	98.6541	95.9572	100.461	102.693	99.4837
27	594.476	372.722	424.679	365.907	372.922	664.997	576.972	529.124	830.871	410.1	474.487	527.41	334.064	580.131	357.099	397.24	600.403	487.15	813.95	540.443	557.081	678.834	519.315	598.981		103.21	104.237	100.484	98.7053	98.4644	101.009	99.9649	104.813	101.525	94.4892	103.112	100.791	90.3109	101.686	97.198	106.931	100.233	103.14	100.542	101.117	102.398	100.4	101.352	101.169
28	601.278	377.135	430.466	366.222	375.64	663.074	602.638	513.452	825.577	413.519	465.172	530.82	353.706	582.036	378.533	390.658	621.813	476.715	825.345	542.177	556.199	655.548	540.996	589.214		104.391	105.472	101.854	98.7903	99.182	100.716	104.412	101.708	100.879	95.2769	101.088	101.442	95.621	102.02	103.032	105.159	103.807	100.931	101.949	101.442	102.236	96.9557	105.584	99.5193
29	613.27	368.637	434.254	368.43	372.665	656.003	606.834	508.479	827.669	418.789	464.428	543.345	350.537	582.428	388.224	379.31	620.812	485.703	841.897	540.506	552.747	665.265	535.127	605.758		106.473	103.095	102.75	99.3859	98.3966	99.6423	105.139	100.723	101.134	96.4912	100.926	103.836	94.7644	102.089	105.67	102.105	103.64	102.834	103.994	101.129	101.602	98.3928	104.438	102.314
30	605.402	369.24	429.517	368.689	370.901	650.746	606.223	518.575	839.779	411.975	461.918	540.741	349.551	559.102	376.963	387.689	605.061	470.465	831.578	545.314	548.529	694.387	526.715	573.073		105.107	103.264	101.629	99.4559	97.9308	98.8439	105.033	102.723	102.614	94.9212	100.381	103.339	94.4977	97.9998	102.605	104.36	101.01	99.6077	102.719	102.029	100.826	102.7	102.797	96.7931
31	605.695	375.244	428.294	352.523	378.052	656.913	614.597	510.123	835.993	434.394	467.732	558.677	351.332	565.062	390.804	383.607	615.225	460.115	817.014	535.121	544.742	694.758	548.97	569.854		105.158	104.943	101.34	95.095	99.8188	99.7806	106.484	101.049	102.151	100.087	101.644	106.766	94.9794	99.0445	106.372	103.262	102.707	97.4163	100.92	100.121	100.13	102.755	107.14	96.2494
32	619.491	378.335	418.772	360.358	367.671	656.947	593.149	515.181	837.954	448.318	478.959	552.269	350.492	567.381	372.422	411.171	602.957	471.202	843.074	534.188	556.237	707.033	546.308	593.245		107.553	105.807	99.0866	97.2085	97.0779	99.7857	102.768	102.051	102.391	103.295	104.084	105.542	94.7522	99.451	101.369	110.681	100.659	99.7636	104.139	99.9469	102.243	104.57	106.62	100.2
33	608.327	373.796	426.16	367.625	362.287	661.511	609.192	508.868	860.12	433.405	478.904	569.27	344.343	567.852	374.181	398.113	599.004	490.151	836.18	532.44	543.715	692.182	531.43	586.456		105.615	104.538	100.835	99.1689	95.6564	100.479	105.547	100.8	105.099	99.8587	104.072	108.79	93.0899	99.5336	101.848	107.166	99.9991	103.776	103.288	99.6198	99.9414	102.374	103.717	99.0534
34	626.788	369.483	435.478	373.115	340.408	665.713	606.284	511.509	849.033	422.345	481.767	562.09	361.866	551.961	393.045	410.466	601.23	472.519	847.486	518.684	567.054	668.467	525.565	567.029		108.82	103.332	103.04	100.65	89.8795	101.117	105.043	101.323	103.745	97.3106	104.694	107.418	97.827	96.7483	106.982	110.491	100.371	100.043	104.684	97.046	104.231	98.8664	102.572	95.7722
35	611.166	363.151	446.065	366.49	349.095	644.972	594.349	518.837	855.008	425.662	481.955	563.618	347.971	573.048	382.508	414.184	607.256	448.34	828.061	518.11	556.468	651.603	553.796	592.757		106.108	101.561	105.545	98.8625	92.1733	97.9669	102.976	102.775	104.475	98.0749	104.735	107.71	94.0708	100.444	104.114	111.492	101.377	94.9233	102.285	96.9386	102.285	96.3724	108.082	100.118
36	618.414	370.723	441.297	354.564	356.178	674.061	597.585	517.457	876.048	424.818	470.243	562.619	351.701	570.508	388.626	402.845	599.029	463.453	839.496	524.041	558.923	688.576	548.23	580.664		107.367	103.679	104.416	95.6454	94.0433	102.385	103.536	102.501	107.046	97.8804	102.19	107.519	95.079	99.9992	105.779	108.44	100.003	98.123	103.697	98.0484	102.737	101.841	106.995	98.0751
37	620.957	372.256	444.086	367.496	351.771	690.993	602.87	515.833	850.569	416.325	487.002	562.261	342.492	568.342	378.568	420.572	604.034	466.884	838.344	523.508	559.753	683.239	540.952	592.543		107.808	104.107	105.076	99.1341	92.8797	104.957	104.452	102.18	103.932	95.9236	105.832	107.451	92.5894	99.6195	103.042	113.212	100.839	98.8494	103.555	97.9486	102.889	101.051	105.575	100.082
38	609.628	354.482	432.315	370.471	360.946	684.971	599.288	521.07	887.625	401.902	475.822	578.566	355.074	557.019	367.94	395.395	599.024	459.027	836.167	510.67	550.781	657.321	551.102	622.401		105.841	99.1365	102.291	99.9365	95.3024	104.042	103.831	103.217	108.46	92.6005	103.402	110.567	95.9909	97.6348	100.149	106.435	100.003	97.186	103.286	95.5466	101.24	97.218	107.556	105.125
39	616.129	354.923	421.354	347.874	350.96	683.799	607.046	505.483	845.122	394.85	475.717	590.108	346.356	552.52	378.365	374.321	603.945	465.153	843.879	503.539	545.159	666.052	552.992	605.287		106.97	99.2597	99.6975	93.8409	92.6656	103.864	105.176	100.13	103.267	90.9756	103.379	112.773	93.6341	96.8461	102.986	100.762	100.824	98.4829	104.239	94.2124	100.207	98.5093	107.925	102.234
40	617.109	354.183	429.218	349.669	371.005	701.362	585.047	516.806	858.049	403.183	478.415	588.289	343.857	551.262	373.811	375.337	595.644	477.952	822.532	525.547	562.916	685.136	535.395	605.28		107.14	99.0527	101.558	94.3251	97.9582	106.532	101.364	102.372	104.846	92.8955	103.966	112.425	92.9584	96.6257	101.747	101.035	99.4382	101.193	101.602	98.33	103.471	101.332	104.49	102.233
41	614.893	366.551	434.157	347.927	353.288	678.103	608.954	501.304	870.845	396.938	481.848	590.904	345.146	557.159	370.1	378.968	622.521	479.733	850.849	529.305	543.921	687.211	537.931	601.291		106.755	102.512	102.727	93.8551	93.2802	102.999	105.506	99.3018	106.41	91.4567	104.712	112.925	93.3071	97.6593	100.737	102.013	103.925	101.57	105.1	99.0332	99.9793	101.639	104.986	101.559
42	611.434	346.522	435.827	349.517	353.563	666.331	602.921	501.457	857.368	398.445	467.338	566.686	359.293	552.103	370.246	395.393	621.27	466.954	849.069	541.476	546.599	698.426	564.333	613.037		106.155	96.9102	103.122	94.2839	93.353	101.211	104.461	99.3321	104.763	91.8038	101.558	108.297	97.1313	96.7731	100.776	106.434	103.716	98.8642	104.88	101.311	100.471	103.297	110.138	103.543
43	615.94	358.931	426.463	346.828	352.94	665.115	607.292	511.82	883.071	384.251	491.568	564.946	336.491	555.659	359.443	372.915	630.788	484.167	847.649	537.177	545.873	664.288	549.819	592.231		106.937	100.381	100.907	93.5587	93.1883	101.026	105.218	101.385	107.904	88.5335	106.824	107.964	90.9671	97.3964	97.8358	100.383	105.305	102.509	104.705	100.506	100.338	98.2485	107.306	100.029
44	606.351	345.574	437.027	364.947	349.818	666.088	611.088	523.245	867.559	399.424	485.421	579.509	366.056	553.692	354.716	379.988	626.464	471.674	852.63	522.194	550.169	680.41	544.767	610.788		105.272	96.6453	103.406	98.4463	92.3641	101.174	105.876	103.648	106.008	92.0293	105.488	110.747	98.9598	97.0516	96.5493	102.287	104.583	99.8636	105.32	97.7027	101.128	100.633	106.32	103.163
45	595.722	364.138	426.459	349.838	332.384	681.959	602.522	515.394	865.221	406.741	471.434	562.685	336.724	550.074	369.781	378.63	610.804	469.07	853.016	529.946	538.432	681.53	558.541	613.036		103.427	101.837	100.905	94.3706	87.7608	103.585	104.392	102.093	105.723	93.7153	102.448	107.532	91.0303	96.4174	100.65	101.922	101.969	99.3122	105.368	99.1531	98.9704	100.798	109.008	103.543
46	616.241	386.236	425.885	376.235	345.382	668.325	598.123	501.575	885.743	396.632	482.518	576.442	353.076	559.983	363.586	380.977	602.839	472.085	840.798	530.652	542.883	688.072	556.878	598.623		106.989	108.017	100.77	101.491	91.1928	101.514	103.63	99.3556	108.23	91.3862	104.857	110.161	95.4508	98.1543	98.9636	102.553	100.639	99.9505	103.858	99.2853	99.7885	101.766	108.683	101.108
47	600.294	391.818	424.078	371.763	341.752	682.246	616.78	521.061	863.589	395.085	501.781	565.844	352.483	543.911	367.543	380.977	618.571	476.72	849.813	524.385	555.207	688.16	558.412	607.779		104.221	109.578	100.342	100.285	90.2344	103.628	106.862	103.215	105.523	91.0297	109.043	108.136	95.2904	95.3371	100.041	102.553	103.266	100.932	104.972	98.1127	102.054	101.779	108.983	102.655
48	594.669	397.487	419.47	363.739	352.551	692.793	612.744	518.165	830.701	393.589	487.429	563.544	366.263	558.255	393.544	387.989	627.137	471.661	831.76	516.771	540.23	675.584	571.485	648.182		103.244	111.163	99.2518	98.1205	93.0857	105.231	106.163	102.642	101.505	90.6851	105.924	107.696	99.0158	97.8514	107.118	104.441	104.696	99.8609	102.742	96.6882	99.3008	99.9191	111.534	109.479
49	618.572	386.378	423.057	361.125	354.788	671.805	619.018	519.662	875.094	411.9	496.306	581.664	367.066	557.564	391.451	378.66	637.167	479.78	860.727	543.075	542.059	683.284	572.661	625.782		107.394	108.057	100.1	97.4155	93.6765	102.043	107.25	102.938	106.929	94.9039	107.853	111.159	99.2328	97.7303	106.548	101.93	106.37	101.58	106.32	101.61	99.637	101.058	111.764	105.696
50	628.154	378.14	432.477	355.404	339.733	663.446	612.041	503.589	891.358	431.777	495.306	575.601	348.341	559.635	363.527	373.184	626.952	473.371	843.923	545.259	550.124	689.939	568.506	612.844		109.058	105.753	102.329	95.8722	89.7012	100.773	106.041	99.7543	108.916	99.4837	107.636	110	94.1707	98.0933	98.9475	100.456	104.665	100.223	104.244	102.018	101.119	102.042	110.953	103.51
51	626.641	372.606	424.505	365.258	359.933	673.246	599.891	518.965	878.689	427.549	492.446	563.979	357.276	557.11	414.164	392.534	610.565	474.399	845.242	531.733	549.244	688.191	563.061	631.643		108.795	104.205	100.443	98.5304	95.0348	102.262	103.936	102.8	107.368	98.5095	107.015	107.779	96.5862	97.6507	112.73	105.664	101.929	100.44	104.407	99.4875	100.958	101.784	109.89	106.686
52	628.45	393.124	406.2	355.014	370.716	672.251	623.921	508.656	878.484	454.52	480.091	583.976	359.886	546.197	411.165	386.449	624.746	482.309	843.443	508.121	551.513	677.976	562.832	633.113		109.109	109.943	96.1119	95.7668	97.882	102.11	108.099	100.758	107.343	104.724	104.33	111.601	97.2918	95.738	111.914	104.026	104.297	102.115	104.185	95.0698	101.375	100.273	109.845	106.934
53	627.78	389.039	425.592	359.908	371.304	675.911	593.078	516.226	879.815	460.397	476.873	573.412	366.162	551.974	403.391	381.321	620.255	472.403	856.197	491.704	534.137	676.272	570.885	624.05		108.993	108.801	100.7	97.087	98.0371	102.666	102.755	102.258	107.506	106.078	103.63	109.582	98.9885	96.7505	109.798	102.646	103.547	100.018	105.76	91.9981	98.1808	100.021	111.417	105.403
54	626.35	389.268	414.268	370.415	368.959	702.57	604.161	512.808	880.268	453.071	484.103	572.446	360.545	540.34	388.221	385.247	627.748	480.516	847.215	472.947	545.996	666.406	564.581	625.566		108.744	108.865	98.021	99.9215	97.4179	106.716	104.676	101.581	107.561	104.39	105.202	109.398	97.4699	94.7112	105.669	103.703	104.798	101.736	104.651	88.4886	100.361	98.5617	110.187	105.659
55	620.419	392.269	441.442	382.525	368.441	704.985	602.173	516.984	878.371	458.109	488.873	569.767	341.752	568.093	382.642	393.396	635.556	484.272	856.365	455.574	537.625	680.217	556.838	649.947		107.715	109.704	104.451	103.188	97.2812	107.082	104.331	102.408	107.33	105.551	106.238	108.885	92.3895	99.5758	104.15	105.896	106.101	102.531	105.781	85.238	98.822	100.604	108.675	109.777
56	592.969	380.664	419.267	375.061	375.919	679.412	623.642	508.753	869.755	439.555	475.474	565.741	359.882	555.293	409.853	387.757	636.959	473.339	868.007	494.387	547.144	689.545	560.028	627.344		102.949	106.459	99.2038	101.175	99.2558	103.198	108.051	100.777	106.277	101.276	103.326	108.116	97.2906	97.3322	111.557	104.378	106.336	100.216	107.219	92.5	100.572	101.984	109.298	105.959
57	597.302	363.372	423.97	374.646	394.454	670.997	609.619	494.485	890.075	421.769	479.142	587.404	353.838	569.148	412.45	382.553	641.583	500.576	842.567	473.847	545.85	695.595	561.125	606.251		103.701	101.623	100.317	101.063	104.149	101.92	105.621	97.9511	108.76	97.1779	104.123	112.256	95.6569	99.7608	112.264	102.978	107.107	105.983	104.077	88.6571	100.334	102.879	109.512	102.397
58	641.368	389.985	433.437	367.948	389.559	682.884	599.137	516.461	898.555	436.605	481.045	565.572	355.039	568.759	424.391	380.818	634.965	466.215	838.755	469.376	533.355	698.746	526.3	575.862		111.352	109.065	102.557	99.2559	102.857	103.725	103.805	102.304	109.796	100.596	104.537	108.084	95.9814	99.6925	115.514	102.511	106.003	98.7078	103.606	87.8206	98.0371	103.345	102.716	97.2642
59	607.17	370.943	414.054	362.872	384.136	687.379	602.057	520.791	893.924	431.272	490.818	569.158	349.296	564.832	399.082	377.568	635.613	479.052	834.416	459.688	538.174	680.49	543.246	580.103		105.414	103.74	97.9703	97.8867	101.425	104.408	104.311	103.162	109.23	99.3674	106.661	108.769	94.4288	99.0043	108.625	101.636	106.111	101.426	103.07	86.008	98.9229	100.645	106.023	97.9804
60	596.11	358.188	433.976	357.089	381.466	699.608	603.748	502.915	888.586	426.903	495.727	569.783	353.081	563.625	411.543	373.222	641.424	478.807	873.506	447.66	558.084	675.263	548.486	602.248		103.494	100.173	102.684	96.3265	100.72	106.266	104.604	99.6208	108.578	98.3608	107.728	108.889	95.4522	98.7928	112.017	100.466	107.081	101.374	107.898	83.7574	102.583	99.8717	107.045	101.721
61	604.254	403.449	417.523	366.024	384.327	687.87	610.244	494.113	883.036	431.737	482.847	589.603	355.63	573.086	392.668	383.997	616.009	469.732	870.108	461.129	514.512	693.023	544.849	584.168		104.908	112.831	98.7912	98.737	101.476	104.483	105.73	97.8773	107.9	99.4744	104.929	112.676	96.1413	100.451	106.879	103.366	102.838	99.4523	107.479	86.2774	94.5736	102.498	106.336	98.667
62	609.303	382.584	397.434	358.724	392.347	696.658	632.071	513.877	870.977	434.742	497.547	589.008	356.774	569.36	408.787	378.784	618.762	471.292	858.008	469.334	545.3	672.309	544.132	624.563		105.785	106.996	94.0379	96.7676	103.593	105.818	109.511	101.792	106.426	100.167	108.123	112.562	96.4504	99.7979	111.267	101.963	103.298	99.7827	105.984	87.8127	100.233	99.4347	106.196	105.49
63	607.938	388.451	430.575	350.759	387.058	688.304	610.395	507.029	849.833	405.923	483.515	589.333	356.243	562.522	388.624	388.365	640.918	488.26	855.704	527.16	550.78	666.153	558.405	634.454		105.548	108.637	101.879	94.6191	102.197	104.549	105.756	100.436	103.842	93.5269	105.074	112.625	96.3069	98.5993	105.779	104.542	106.996	103.375	105.699	98.632	101.24	98.5242	108.981	107.16
64	627.913	396.617	431.501	366.912	371.177	681.123	618.841	517.117	845.573	425.319	494.516	605.347	362.939	578.615	387.65	384.822	623.865	481.31	851.627	537.962		682.386	538.175	635.639		109.016	110.92	102.099	98.9765	98.0035	103.458	107.219	102.434	103.322	97.9958	107.464	115.685	98.1172	101.42	105.513	103.589	104.15	101.904	105.196	100.653		100.925	105.033	107.361
65	620.374	380.674	427.519	381.237	399.509	702.834	612.391	513.069	835.914	427.809	482.719	578.574	372.323	559.91	391.821	384.298	632.403	480.251	866.818	515.204		695.055		633.825		107.707	106.461	101.156	102.841	105.484	106.756	106.101	101.632	102.142	98.5695	104.901	110.569	100.654	98.1416	106.649	103.447	105.575	101.679	107.072	96.3949		102.799		107.054
66	620.026	389.731	422.851	365.746	402.172	689.657	610.245	509.947	842.45	436.85	478.222	573.574	355.609	565.219	383.769	392.323	646.053	485.799	878.843	498.279		660.913		607.183		107.646	108.994	100.052	98.662	106.187	104.754	105.73	101.014	102.94	100.652	103.924	109.613	96.1356	99.072	104.457	105.608	107.854	102.854	108.558	93.2282		97.7492		102.554
67	609.279	385.002	432.57	365.828	398.97	697.127	612.308	510.608	835.09	435.601	495.891	567.053	366.924	563.085	379.527	389.506	615.992	485.463	832.984	482.418		680.052		605.245		105.781	107.672	102.351	98.6839	105.342	105.889	106.087	101.145	102.041	100.365	107.763	108.367	99.1946	98.6981	103.302	104.849	102.835	102.783	102.893	90.2607		100.58		102.227
68	605.362	365.143	420.741	351.189	403.827	695.373	613.581	507.35	845.313	419.016	482.965	564.854	354.142	557.557	391.552	377.504	618.46	488.949	853.421	469.415		676.983		587.698		105.1	102.118	99.5525	94.735	106.624	105.622	106.308	100.499	103.29	96.5435	104.954	107.947	95.7388	97.7291	106.576	101.619	103.247	103.521	105.417	87.8278		100.126		99.2633
69	618.617	364.235	445.303	361.097	384.7	698.308	606.865	508.611	857.122	418.379	475.793	581.556	372.027	563.648	385.989	364.753	637.042	486.014	865.666	448.301		700.57		581.312		107.402	101.864	105.364	97.4077	101.574	106.068	105.144	100.749	104.733	96.3968	103.396	111.138	100.574	98.7968	105.061	98.1861	106.349	102.9	106.93	83.8773		103.615		98.1847
70	614.764	362.183	412.993	374.152	384.574	688.659	613.099	508.029	835.005	435.661	480.593	584.361	361.92	578.724	388.424	380.391	641.691	476.767	869.967	459.574		686.425		579.608		106.733	101.29	97.7192	100.929	101.541	104.603	106.224	100.634	102.031	100.379	104.439	111.674	97.8417	101.439	105.724	102.396	107.125	100.942	107.461	85.9866		101.522		97.8968
71	622.13	390.564	412.88	381.481	374.871	691.326	616.488	519.473	835.604	428.443	498.965	557.899	371.996	579.982	386.695	383.746	639.524	497.598	868.922	488.373		682.051		625.414		108.012	109.227	97.6926	102.907	98.979	105.008	106.811	102.901	102.104	98.7155	108.431	106.617	100.566	101.66	105.254	103.299	106.764	105.352	107.332	91.3748		100.876		105.634
72	634.906	359.452	431.489	357.122	362.347	700.822	618.339	505.099	847.936	422.905	486.83	575.925	365.091	568.299	389.013	375.379	629.981	478.658	863.214	476.228		681.398		589.647		110.23	100.526	102.096	96.3354	95.6723	106.45	107.132	100.053	103.611	97.4397	105.794	110.062	98.699	99.6119	105.884	101.047	105.171	101.342	106.627	89.1026		100.779		99.5924
73	635.634	368.533	424.807	370.851	375.171	692.764	607.216	527.954	854.503	438.96	483.585	581.143	364.871	562.766	377.909	372.329	643.09	475.294	849.267	481.141		671.136		613.327		110.356	103.066	100.515	100.039	99.0583	105.226	105.205	104.581	104.413	101.139	105.089	111.06	98.6396	98.6422	102.862	100.226	107.359	100.63	104.904	90.0218		99.2612		103.592
74	635.228	384.936	441.061	359.153	373.241	680.184	600.136	499.194	833.624	436.066	479.547	571.374	375.307	568.386	387.753	384.118	645.602	486.099	844.185	495.829		695.52		637.901		110.286	107.653	104.36	96.8834	98.5486	103.315	103.978	98.8839	101.862	100.472	104.211	109.193	101.461	99.6272	105.542	103.399	107.778	102.918	104.277	92.7698		102.868		107.743
75	648.494	375.776	430.553	354.029	369.833	692.083	603.254	519.937	869.579	433.5	497.056	584.504	353.811	564.496	388.444	388.119	651.736	467.014	826.451	491.153		692.613		657.633		112.589	105.092	101.874	95.5013	97.6488	105.123	104.519	102.993	106.255	99.8808	108.017	111.702	95.6495	98.9454	105.73	104.476	108.802	98.877	102.086	91.8949		102.438		111.075
76	638.807	400.037	430.938	375.422	377.174	697.302	608.045	515.77	890.044	439.131	481.408	577.774	382.606	548.918	398.398	406.078	626.55	479.3	875.42	534.924		695.223		643.428		110.907	111.877	101.965	101.272	99.587	105.915	105.349	102.167	108.756	101.178	104.616	110.416	103.434	96.2147	108.439	109.31	104.598	101.478	108.135	100.084		102.824		108.676
77	636.416	382.763	419.349	362.106	367.431	689.205	597.932	507.089	887.058	446.226	498.211	590.181	395.499	561.726	380.366	395.588	647.974	475.724	850.811	552.597		685.789		630.956		110.492	107.046	99.2232	97.68	97.0146	104.685	103.596	100.448	108.391	102.813	108.268	112.787	106.919	98.4599	103.531	106.487	108.174	100.721	105.095	103.391		101.428		106.57
78	641.542	399.645	420.53	365.896	374.215	697.558	608.026	502.647	871.731	444.793	495.578	579.607	390.923	561.344	383.866	405.68	643.037	478.321	851.95	562.307		676.804		643.045		111.382	111.767	99.5026	98.7025	98.8058	105.954	105.345	99.5678	106.518	102.483	107.695	110.766	105.682	98.3928	104.483	109.203	107.35	101.271	105.236	105.208		100.1		108.611
79	634.404	373.199	412.011	391.361	383.952	687.298	615.608	511.356	898.679	438.955	488.484	564.493	389.749	554.738	392.404	383.638	624.849	494.299	849.208	551.945		699.714		678.869		110.143	104.371	97.487	105.572	101.377	104.396	106.659	101.293	109.811	101.137	106.154	107.878	105.365	97.235	106.807	103.27	104.314	104.654	104.897	103.269		103.488		114.662
80	633.569	393.589	406.659	380.811	364.03	690.392	607.666	520.107	878.582	434.218	492.444	587.847	395.777	549.833	391.647	415.419	653.989	483.782	831.938	566.056		694.721		697.036		109.998	110.073	96.2205	102.726	96.1166	104.866	105.283	103.026	107.355	100.046	107.014	112.341	106.995	96.3752	106.602	111.825	109.179	102.427	102.764	105.909		102.75		117.731
81	604.588	370.674	406.788	361.012	381.894	697.334	595.703	506.195	886.085	443.863	490.916	582.553	406.163	551.801	399.687	415.523	639.001	476.675	866.115	583.654		685.95				104.966	103.665	96.2511	97.3848	100.833	105.92	103.21	100.271	108.272	102.268	106.682	111.329	109.802	96.7201	108.79	111.853	106.676	100.922	106.986	109.202		101.452
82	630.535	394.753	397.259	360.298	381.517	673.853	592.525	515.351	850.179	427.285	492.247	585.091	405.692	551.126	393.704	415.444	636.877	459.286	836.367	562.26		670.49				109.471	110.399	93.9965	97.1924	100.734	102.354	102.66	102.084	103.885	98.4488	106.972	111.814	109.675	96.6019	107.161	111.832	106.322	97.2407	103.311	105.199		99.1657
83	615.524	383.853	392.415	342.198	373.664	695.695	610.602	497.216	842.501	420.31	484.76	557.781	395.718	550.809	385.398	438.137	629.716	486.587	830.66	554.453		685.581				106.865	107.35	92.8502	92.3098	98.6603	105.671	105.792	98.4921	102.947	96.8417	105.344	106.595	106.979	96.5463	104.901	117.94	105.126	103.021	102.606	103.738		101.398
84	629.945	382.741	395.23	360.12	375.289	702.401	601.982	504.751	854.474	419.629	487.692	573.794	396.113	545.659	381.962	402.236	629.299	486.91	859.642	553.343		728.918				109.369	107.04	93.5164	97.1442	99.0892	106.69	104.298	99.9845	104.41	96.6848	105.982	109.655	107.085	95.6436	103.965	108.276	105.057	103.089	106.186	103.531		107.807
85	620.658	378.691	390.827	334.988	373.44	709.247	592.209	516.608	859.931	425.197	481.684	580.992	400.924	567.554	378.564	398.665	627.456	485.26	875.299	578.997		707.197				107.756	105.907	92.4745	90.3647	98.6011	107.73	102.605	102.333	105.076	97.9676	104.676	111.031	108.386	99.4814	103.04	107.315	104.749	102.74	108.12	108.331		104.595
86	651.188	372.141	423.59	369.256		712.492	597.116	521.391	879.251	439.668	494.814	585.793	401.023	564.402	366.126	407.203	627.92	484.625	846.323	556.394		701.959				113.057	104.075	100.227	99.6087		108.223	103.455	103.281	107.437	101.302	107.529	111.948	108.413	98.9289	99.6549	109.613	104.826	102.606	104.541	104.102		103.82
87	635.837	373.078	400.498	391.078		707.024	602.202	495.501	852.88	435.015	490.46	570.002	404.559	558.539	374.244	408.284	644.85	466.606	845.128	539.145		689.704				110.392	104.337	94.7629	105.495		107.392	104.336	98.1523	104.215	100.23	106.583	108.93	109.369	97.9013	101.865	109.904	107.653	98.7905	104.393	100.874		102.007
88	618.63	375.244	385.452	367.949		696.622	601.037	507.785	870.637	421.51	485.2	566.217	403.824	570.398	368.904	387.484	614.269	483.63	858.02	532.878		673.637				107.404	104.943	91.2027	99.2563		105.812	104.134	100.586	106.385	97.1181	105.44	108.207	109.17	99.9799	100.411	104.305	102.548	102.395	105.986	99.7018		99.6311
89	616.388	362.424	406.68	354.041		682.912	631.482	510.667	862.31	423.124	478.819	616.934	420.669	570.384	377.944	384.507	617.952	485.195	837.973	504.19		702.617				107.015	101.357	96.2255	95.5043		103.73	109.409	101.156	105.367	97.4899	104.053	117.899	113.724	99.9774	102.872	103.504	103.162	102.726	103.509	94.3343		103.917
90	582.642	394.609	414.608	365.683		679.634	622.908	512.25	859.529	427.058	499.422	543.887	398.975	560.249	366.116	403.462	605.645	488.447	870.278	503.247		719.258				101.156	110.358	98.1014	98.645		103.232	107.924	101.47	105.027	98.3965	108.531	103.94	107.859	98.2009	99.6521	108.606	101.108	103.415	107.5	94.1577		106.379
91	587.782	392.682	410.601	373.998		680.22	604.418	514.086	873.185	439.536	498.248	578.609	419.96	565.318	357.388		613.471	488.789	875.577	490.521		731.723				102.048	109.82	97.1532	100.888		103.321	104.72	101.834	106.696	101.272	108.276	110.575	113.532	99.0895	97.2766		102.414	103.487	108.154	91.7768		108.222
92	593.619	396.525	405.544	331.834		678.684	602.437	510.788	841.985	441.18	492.728	579.984	418.452	570.634	370.174		627.453	498.606	837.823	498.319		698.139				103.062	110.894	95.9567	89.514		103.087	104.377	101.18	102.883	101.65	107.076	110.838	113.125	100.021	100.757		104.749	105.566	103.491	93.2358		103.255
93	606.002	401.95	416.222	331.371		707.415	607.896	504.183	862.584	453.949	485.747	569.311	414.637	570.168	373.206		647.669	502.544	861.572	508.046		705.438				105.212	112.412	98.4832	89.3891		107.451	105.323	99.8721	105.401	104.592	105.559	108.798	112.093	99.9395	101.582		108.123	106.399	106.424	95.0557		104.334
94	595.703	384.992	404.951	307.593		700.115	577.341	495.791	871.064	441.304	485.043	573.074	436.406	566.601	369.483		630.567	490.617	860.518	497.254		686.94				103.424	107.669	95.8165	82.9748		106.343	100.029	98.2097	106.437	101.679	105.406	109.518	117.978	99.3142	100.569		105.268	103.874	106.294	93.0365		101.599
95	600.739	394.723	423.858	322.452		684.54	611.969	515.772	882.154	441.823	489.072	560.547	426.124	577.156	370.303		625.474	490.958	841.327	497.569		682.073				104.298	110.391	100.29	86.9831		103.977	106.028	102.168	107.792	101.798	106.281	107.123	115.199	101.164	100.792		104.418	103.946	103.924	93.0955		100.879
96	602.248	374.408	412.21	363.888		671.092	599.918	519.476	853.973	423.459	499.736	577.67	413.134	572.073	377.587		587.527	504.773	862.171	493.11		684.819				104.56	104.709	97.5339	98.1606		101.934	103.94	102.901	104.348	97.5671	108.599	110.396	111.687	100.273	102.775		98.0831	106.871	106.498	92.2611		101.285
97	594.273	377.669	416.406	357.957		660.882	587.261	512.375	853.877	443.349	484.312	562.519	413.578	579.844	381.887		635.083	519.66	830.031	490.189		711.543				103.175	105.621	98.5269	96.5607		100.384	101.748	101.495	104.337	102.15	105.247	107.5	111.807	101.636	103.945		106.022	110.023	102.528	91.7147		105.237
98	602.564	393.925	430.749	343.519		668.662	592.934	525.053	849.013	442.751	496.847	579.265	419.884	578.103	370.963		621.654	507.719	836.933	513.748		713.473				104.615	110.167	101.921	92.6659		101.565	102.73	104.006	103.742	102.012	107.971	110.701	113.512	101.33	100.971		103.78	107.495	103.381	96.1225		105.523
99	600.698	374.339	412.846	341.693		681.348	602.746	503.648	851.705	434.759	505.347	571.165	409.491	599.713	385.123		616.876	508.09	871.181	515.524		692.139				104.291	104.69	97.6846	92.1736		103.492	104.431	99.7661	104.071	100.171	109.818	109.153	110.702	105.118	104.826		102.983	107.574	107.611	96.4549		102.368
100	591.612	375.022	442.198	328.204		681.268	585.663	502.542	832.414	435.232	487.411	599.842	416.706	583.487	394.435		626.073	506.881	864.23	541.839		720.784				102.713	104.881	104.63	88.5347		103.48	101.471	99.5471	101.714	100.28	105.921	114.633	112.653	102.274	107.36		104.518	107.318	106.753	101.378		106.604
101	597.089	366.049		350.256		694.598	600.091	514.245	864.426	441.264	494.72	612	424.879	590.582	382.595		631.623	502.736	877.331	548.048		713.035				103.664	102.371		94.4835		105.505	103.97	101.865	105.626	101.669	107.509	116.956	114.862	103.518	104.138		105.445	106.44	108.371	102.54		105.458
102	606.825	361.222		372.975		679.366	571.23	511.992	837.7	446.436	496.088	582.244	421.139	595.863	365.47		605.335	501.764	858.608	540.509		694.5				105.355	101.021		100.612		103.191	98.9701	101.419	102.36	102.861	107.806	111.27	113.851	104.443	99.4765		101.056	106.234	106.058	101.13		102.717
103	602.976	374.71		348.39		691.401	585.499	503.631	871.06	456.086	507.668	596.488	422.489	589.514	393.708		628.691	499.557	856.05	576.18		696.288				104.686	104.793		93.98		105.019	101.442	99.7628	106.436	105.085	110.323	113.992	114.216	103.331	107.162		104.955	105.767	105.742	107.804		102.981
104	602.281	359.087		325.737		702.458	597.24	517.765	890.23	444.338	488.266	563.426	426.01	573.267	386.47		626.187	485.155	836.262	564.046		681.488				104.566	100.424		87.8693		106.699	103.477	102.562	108.779	102.378	106.106	107.674	115.168	100.483	105.192		104.537	102.718	103.298	105.533		100.792
105	591.853	380.812		343.619		664.666	598.523	505.202	883.382	430.484	481.822	553.984	425.242	591.279	381.136		627.851	481.702	878.557	522.361		691.714				102.755	106.5		92.6929		100.958	103.699	100.074	107.942	99.1859	104.706	105.869	114.96	103.64	103.74		104.815	101.987	108.522	97.734		102.305
106	619.974	383.655		347.134		676.252	597.066	521.185	856.297	428.973	484.448	575.474	419.266	580.12	387.074		625.337	511.778	844.875	558.878		694.771				107.637	107.295		93.6411		102.718	103.446	103.24	104.632	98.8377	105.277	109.976	113.345	101.684	105.357		104.395	108.355	104.362	104.566		102.757
107	629.176	387.793		335.014		679.97	594.92	508.256	866.555	427.098	494.854	589.228	407.936	589.606	382.335		612.351	510.703	849.106	538.014		715.757				109.235	108.452		90.3718		103.283	103.075	100.679	105.886	98.4058	107.538	112.605	110.282	103.347	104.067		102.227	108.127	104.884	100.663		105.861
108	628.008	390.689		335.173		692.987	571.003	499.231	887.901	435.319	494.075	565.866	400.897	588.226	408.22		620.027	492.312	844.711	547.605		698.933				109.032	109.262		90.4146		105.26	98.9308	98.8912	108.494	100.3	107.369	108.14	108.379	103.105	111.112		103.509	104.233	104.342	102.457		103.372
109	630.099	395.502		330.958		701.797	591.597	519.768	871.563	451.833	497.701	590.667	398.891	605.68	401.603		611.002	506.84	850.646	547.102		725.328				109.395	110.608		89.2777		106.598	102.499	102.959	106.498	104.105	108.157	112.88	107.837	106.164	109.311		102.002	107.309	105.075	102.363		107.276
110	601.015	416.876		339.758		689.916	596.671	521.63	881.114	455.18	495.012	583.662	411.886	598.757	406.642		597.819	509.765	849.965	527.143		700.733				104.346	116.586		91.6514		104.793	103.378	103.328	107.665	104.876	107.572	111.541	111.349	104.951	110.683		99.8013	107.928	104.991	98.6287		103.639
111	628.018	395.953		327.645		690.901	594.952	511.517	888.328	453.474	504.341	583.046	402.529	601.714	401.738		596.841	488.572	854.294	530.469		692.747				109.034	110.735		88.3839		104.943	103.08	101.325	108.546	104.483	109.6	111.423	108.82	105.469	109.348		99.6381	103.441	105.525	99.251		102.457

## Sheet: more than 1 um per min
	7	7	7	7	7	7	7	7	8	8	8	8	8	8	8	8	8	8	8		7	7	7	7	7	7	7	7	8	8	8	8	8	8	8	8	8	8	8
	3	4	7	8	16	20	21	22	2	3	4	11	12	15	16	17	18	22	23		3	4	7	8	16	20	21	22	2	3	4	11	12	15	16	17	18	22	23
1	428.294	238.137	323.134	653.502	274.459	521.358	540.221	619.363	274.005	301.945	395.638	605.362	388.487	433.225	721.391	633.487	1158.88	743.646	461.181
2	455.219	240.472	316.557	689.05	266.414	511.671	547.212	614.07	266.665	295.609	399.328	584.34	418.791	440.447	720.573	628.286	1176.74	749.836	461.465
3	447.523	263.81	318.371	701.757	271.161	529.393	536.625	602.036	269.287	306.601	411.079	561.96	414.691	464.726	735.682	630.023	1179.01	746.211	448.825
4	447.751	281.075	347.086	707.021	279.232	544.997	541.143	644.43	278.699	304.434	397.895	592.413	403.671	435.837	712.016	620.497	1203.01	734.03	452.591
5	459.588	279.899	336.745	714.81	289.654	525.684	535.394	647.627	280.521	306.211	427.13	594.877	414.2	438.141	734.473	641.924	1187.79	736.313	500.138
6	449.071	273.81	339.411	711.237	278.536	532.175	526.896	586.364	284.672	306.534	428.218	604.149	413.756	450.429	744.29	618.784	1188.8	748.514	517.254
7	439.916	289.985	350.23	729.718	277.676	550.789	534.857	613.962	285.939	317.13	417.468	601.362	412.172	485.565	752.619	626.865	1122.84	752.295	521.353
8	446.63	280.607	357.82	717.913	281.954	521.097	546.804	598.193	312.905	326.042	427.154	587.249	414.962	506.719	748.283	640.256	1116.58	743.421	499.354
9	432.424	279.323	370.648	710.479	291.245	549.363	541.879	620.971	306.771	327.27	441.322	599.771	418.02	539.039	764.755	630.232	1144.7	766.009	510.556
10	469.855	280.496	355.1	713.086	297.205	549.26	545.764	606.687	308.185	345.421	454.825	602.773	427.388	550.96	782.065	622.16	1217.91	761.201	523.035
11	479.265	280.54	355.386	702.832	305.204	550.942	535.368	636.338	311.622	340.256	444.621	588.441	408.246	560.087	769.549	635.758	1189.86	772.211	530.728
12	465.799	310.922	369.752	701.599	315.586	547.318	569.332	635.226	313.92	336.111	436.83	584.215	410.308	582.342	780.567	653.327	1160.38	768.925	538.505
13	466.648	303.021	370.835	733.219	327.844	538.142	552.424	631.334	317.145	338.386	448.208	589.323	411.186	565.026	770.67	652.927	1163.6	759.055	522.455
14	490.592	296.416	379.944	728.579	329.313	523.599	540.924	595.291	300.899	361.269	461.295	614.821	395.203	564.078	792.534	650.39	1176.2	756.308	532.58
15	516.635	298.547	373.726	736.099	330.342	527.162	563.258	593.704	318.573	360.358	469.258	606.709	423.028	541.329	791.426	679.932	1153.19	778.593	514.301
16	513.43	291.505	369.227	756.853	326.648	541.828	565.938	573.912	317.906	355.45	466.135	604.481	426.365	559.988	765.071	669.128	1155.57	767.931	431.304
17	503.726	298.133	368.745	731.776	308.305	543.732	567.683	562.296	313.578	378.44	473.385	618.575	434.29	547.155	777.386	682.922	1190.34	767.588	442.934
18	500.188	276.719	362.367	752.858	316.431	521.606	576.704	591.195	327.944	354.074	483.757	619.566	442.426	561.253	770.72	686.891	1175.35	786.503	450.071
19	527.605	282.944	362.259	763.506	296.66	546.949	596.587	587.877	317.928	365.018	481.455	637.148	434.553	562.601	753.994	681.959	1156.74	766.466	460.26
20	496.757	282.63	360.335	768.739	305.165	564.457	600.602	597.539	307.924	381.171	490.082	637.824	417.036	582.67	773.12	694.63	1175.34	779.947	469.587		100	100	100	100	100	100	100	100	100	100	100	100	100	100	100	100	100	100	100
21	484.93	277.118	344.173	757.719	309.756	593.521	566.312	629.718	291.963	396.403	451.417	615.63	422.447	565.935	757.321	668.153	1183.75	774.68	441.584		97.6192	98.0498	95.5148	98.5665	101.504	105.149	94.2908	105.385	94.8165	103.996	92.1105	96.5204	101.298	97.1279	97.9564	96.1884	100.716	99.3247	94.0368
22	482.002	281.405	366.665	756.824	310.481	596.8	583.04	595.671	326.442	375.204	466.192	606.169	443.733	584.742	789.109	656.437	1148.26	770.695	433.544		97.0296	99.5664	101.757	98.4502	101.742	105.73	97.076	99.6873	106.014	98.4346	95.1253	95.0371	106.402	100.356	102.068	94.5017	97.6963	98.8138	92.3246
23	467.483	262.174	366.142	736.737	302.568	588.318	596.628	641.241	299.712	381.436	449.887	599.316	434.337	594.282	794.497	648.407	1143.66	753.974	445.412		94.1069	92.7621	101.612	95.8372	99.149	104.227	99.3384	107.314	97.3333	100.069	91.7983	93.9627	104.149	101.993	102.765	93.3457	97.3047	96.6699	94.8519
24	507.04	270.548	360.639	776.885	305.587	605.904	599.262	595.265	308.645	378.924	444.008	611.359	435.089	595.042	775.452	671.568	1138.7	730.543	458.948		102.07	95.7252	100.084	101.06	100.138	107.343	99.777	99.6194	100.234	99.4104	90.5987	95.8507	104.329	102.123	100.302	96.68	96.8832	93.6658	97.7344
25	497.911	263.251	359.536	757.945	302.411	591.617	606.139	622.91	323.066	377.07	461.384	614.716	413.611	569.356	791.34	657.339	1137.86	765.47	446.44		100.232	93.1432	99.7783	98.5959	99.0976	104.812	100.922	104.246	104.918	98.9242	94.1443	96.3771	99.1788	97.7149	102.357	94.6316	96.8116	98.1439	95.0708
26	503.319	276.549	363.135	761.175	330.128	610.569	597.773	613.234	329.749	382.729	458.525	610.91	428.643	571.82	817.454	641.855	1118.21	764.103	465.664		101.321	97.8484	100.777	99.0161	108.18	108.169	99.529	102.626	107.088	100.409	93.561	95.7804	102.783	98.1379	105.734	92.4024	95.1398	97.9686	99.1645
27	501.158	276.585	378.022	761.946	324.908	591.471	603.574		336.852	399.382	458.15	603.535	443.175	586.646	796.689	645.365	1157.15	758.315	508.684		100.886	97.861	104.909	99.1164	106.47	104.786	100.495		109.395	104.778	93.4843	94.6241	106.268	100.682	103.049	92.9077	98.4525	97.2265	108.326
28	537.506	265.025	363.209	758.838	335.109	582.963	585.814		324.14	398.777	464.564	607.997	458.878	588.668	797.452	661.979	1145.48	781.032	484.86		108.203	93.7708	100.798	98.7121	109.813	103.279	97.5378		105.266	104.619	94.7931	95.3237	110.033	101.029	103.147	95.2996	97.4603	100.139	103.252
29	521.134	271.785	379.337	761.79	332.067	570.419	603.978		327.075	390.342	475.971	609.75	449.612	571.439	797.059	656.969	1142.18	820.059	487.657		104.907	96.1626	105.273	99.0961	108.816	101.056	100.562		106.22	102.406	97.1207	95.5985	107.811	98.0725	103.096	94.5782	97.1791	105.143	103.848
30	530.946	273.412	354.864	761.923	329.462	579.629	618.084		329.449	386.971	473.821	627.655	448.605	582.274	790.778	656.328	1141.91	793.007	519.541		106.882	96.7383	98.4818	99.1135	107.962	102.688	102.911		106.99	101.522	96.682	98.4058	107.57	99.932	102.284	94.486	97.1563	101.675	110.638
31	516.493	260.679	371.853	780.336	316.523	542.087	608.463		321.165	392.11	458.267	620.05	443.569	599.75	803.872	644.939	1107.51	765.945	527.76		103.973	92.2334	103.197	101.509	103.722	96.0369	101.309		104.3	102.87	93.5082	97.2134	106.362	102.931	103.978	92.8463	94.2295	98.2048	112.388
32	522.705	256.471	365.153	751.924	317.321	566.827	602.309		337.186	387.207	459.007	628.084	440.632	599.696	803.219	639.591	1164.9	724.745	475.357		105.223	90.7444	101.337	97.8127	103.984	100.42	100.284		109.503	101.584	93.6592	98.473	105.658	102.922	103.893	92.0765	99.112	92.9223	101.229
33	492.708	255.287	360.985	749.932	344.839	557.217	586.387		315.098	419.389	458.257	634.074	461.923	619.626	795.511	651.495	1214.11	737.406	476.834		99.1848	90.3255	100.18	97.5536	113.001	98.7174	97.6333		102.33	110.027	93.5062	99.4121	110.763	106.342	102.896	93.7902	103.299	94.5457	101.543
34	509.493	274.722	358.408	753.483	321.671	541.905	598.625		305.192	398.675	460.862	663.173	449.761	622.195	797.544	682.708	1280.65	731.303	520.014		102.564	97.2021	99.4651	98.0155	105.409	96.0046	99.6708		99.1129	104.592	94.0377	103.974	107.847	106.783	103.159	98.2836	108.961	93.7632	110.739
35	477.47	269.61	366.79	751.578	336.647	550.945	556.925		296.907	378.837	448.063	658.77	462.187	631.285	812.272	689.55	1269.9	729.795	506.687		96.1173	95.3931	101.791	97.7677	110.316	97.6063	92.7279		96.4222	99.3876	91.4262	103.284	110.827	108.343	105.064	99.2687	108.046	93.5698	107.901
36	469.775	269.666	373.746	714.962	330.932	547.927	579.522		311.702	391.721	450.111	616.579	452.923	614.974	794.145	699.461	1257.16	727.938	503.066		94.5683	95.4131	103.722	93.0046	108.444	97.0715	96.4902		101.227	102.768	91.8441	96.6691	108.605	105.544	102.72	100.696	106.962	93.3318	107.129
37	465.104	292.785	381.475	723.491	324.665	542.822	591.504		316.176	394.924	445.542	620.081	461.604	599.369	782.214	692.892	1253.96	718.396	417.969		93.628	103.593	105.867	94.1141	106.39	96.1672	98.4853		102.68	103.608	90.9118	97.2182	110.687	102.866	101.176	99.7498	106.689	92.1083	89.0078
38	472.752	293.82	362.08	742.934	305.767	572.394	586.411		309.604	405.065	448.051	611.789	459.564	570.063	794.961	709.441	1189.23	733.255	441.769		95.1676	103.959	100.484	96.6433	100.197	101.406	97.6372		100.546	106.269	91.4237	95.9182	110.198	97.8363	102.825	102.132	101.182	94.0135	94.076
39	485.234	296.204	351.525	759.614	309.624	562.871	592.233		302.583	369.34	466.413	593.136	459.371	544.393	797.116	697.73	1202.54	730.417	437.851		97.6803	104.803	97.555	98.813	101.461	99.7191	98.6066		98.2654	96.8962	95.1705	92.9938	110.151	93.4308	103.104	100.446	102.315	93.6497	93.2418
40	469.854	302.686	343.711	753.872	337.757	532.005	606.527		302.539	369.091	471.433	607.56	466.917	592.006	802.198	682.365	1223.48	733.696	334.059		94.5842	107.096	95.3866	98.0661	110.68	94.2508	100.987		98.2513	96.8307	96.1947	95.2551	111.961	101.602	103.761	98.2344	104.097	94.07	71.139
41	518.668	322.627	335.832	759.022	332.499	557.877	559.446		283.34	388.851	477.385	621.344	470.168	579.992	785.801	690.367	1171.16	750.789	331.685		104.411	114.152	93.2	98.7361	108.957	98.8343	93.1475		92.0163	102.015	97.4092	97.4163	112.74	99.5403	101.64	99.3863	99.6444	96.2616	70.6332
42	526.833	336.938	352.729	745.795	344.366	576.785	597.194		300.761	380.524	461.044	611.694	469.214	469.98	817.678	672.388	1189.9	765.025	344.903		106.055	119.215	97.8891	97.0154	112.846	102.184	99.4326		97.6737	99.8302	94.0749	95.9032	112.512	80.6596	105.763	96.7981	101.239	98.0868	73.4482
43	520.448	335.417	373.132	753.759	326.345	618.362	617.145		301.215	377.865	458.138	626.03	444.029	463.187	817.984	679.755	1198.31	743.564	415.779		104.769	118.677	103.552	98.0514	106.941	109.55	102.754		97.8213	99.1326	93.4819	98.1509	106.473	79.4939	105.803	97.8585	101.954	95.3353	88.5414
44	533.241	318.293	373.677	747.534	327.56	566.529	622.869		306.391	367.071	453.331	624.946	435.544	510.513	818.888	691.202	1215.1	745.672	411.629		107.344	112.618	103.703	97.2417	107.339	100.367	103.708		99.5023	96.3008	92.5011	97.981	104.438	87.6161	105.92	99.5066	103.384	95.6055	87.6577
45	532.569	323.006	367.911	746.129	330.53	595.273			315.323	369.782	455.668	633.548	416.3	552.3	823.092	667.451	1212.94	754.026	459.241		107.209	114.286	102.103	97.0589	108.312	105.459			102.403	97.0121	92.978	99.3297	99.8235	94.7877	106.464	96.0872	103.2	96.6766	97.7967
46	520.364	334.009	367.083	716.91	319.669	550.653			316.495	370.445	467.458	630.505	463.452	484.457	816.013	691.438	1210.4	754.509	457.873		104.752	118.179	101.873	93.258	104.753	97.5544			102.784	97.186	95.3838	98.8526	111.13	83.1442	105.548	99.5404	102.983	96.7385	97.5056
47	496.563	318.239	364.828	727.728	310.765	558.838			329.576	362.86	463.951	626.137	487.285	500.06	833.162	685.332	1212.17	755.006	458.722		99.9608	112.599	101.247	94.6652	101.835	99.0045			107.032	95.1961	94.668	98.1677	116.845	85.8222	107.766	98.6614	103.134	96.8022	97.6863
48	493.541	322.56	381.171	742.455	313.826	556.894			326.638	360.48	452.61	608.484	490.776	518.441	830.475	704.383	1227.51	779.004	470.6		99.3525	114.128	105.782	96.581	102.838	98.6601			106.078	94.5718	92.3539	95.4	117.682	88.9767	107.419	101.404	104.439	99.8792	100.216
49	497.677	321.676	372.49	761.89	326.267	545.288			339.541	360.712	461.343	625.326	471.502	464.523	833.224	663.022	1207.29	760.069	469.786		100.185	113.815	103.373	99.1091	106.915	96.6041			110.268	94.6326	94.1358	98.0406	113.06	79.7232	107.774	95.4496	102.719	97.4514	100.042
50	509.023	314.747	375.66	721.525	310.208	557.849			321.704	369.625	456.614	627.328	475.149	479.806	834.696	667.785	1198.93	770.217	474.105		102.469	111.363	104.253	93.8583	101.653	98.8293			104.475	96.9709	93.1709	98.3544	113.935	82.346	107.965	96.1353	102.008	98.7526	100.962
51	504.369	307.956	358.083	741.735	332.005	545.758			337.341	363.384	458.928	610.215	476.216	471.513	825.058	651.297	1245.83	717.461	506.367		101.532	108.961	99.3751	96.4873	108.795	96.6873			109.553	95.3337	93.6431	95.6714	114.191	80.9228	106.718	93.7617	105.997	91.9885	107.832
52	499.249	290.271	371.026	719.713	325.041	557.266			359.789	369.777	460.189	606.536	509.454	488.205	821.858	662.853	1212.22	715.486	482.499		100.502	102.703	102.967	93.6227	106.513	98.7261			116.843	97.0108	93.9004	95.0945	122.161	83.7876	106.304	95.4253	103.138	91.7352	102.75
53	498.234	288.366	375.113	736.359	337.804	519.505			317.802	375.667	459.425	615.347	496.955	540.059	815.102	661.44	1176.24	745.519	518.226		100.297	102.029	104.101	95.788	110.696	92.0363			103.208	98.5559	93.7445	96.476	119.164	92.6869	105.43	95.222	100.077	95.5858	110.358
54	516.385	278.768	358.75	740.161	337.559	522.803			305.612	381.852	465.946	625.418	487.208	573.229	825.935	646.67	1219.64	701.194	480.893		103.951	98.6334	99.5602	96.2826	110.615	92.6205			99.2494	100.179	95.0752	98.055	116.826	98.3796	106.831	93.0956	103.77	89.9029	102.408
55	492.75	279.424	348.08	707.65	331.91	525.876			300.507	378.244	459.659	614.126	479.686	560.248	808.061	645.797	1205.76	715.751	477.241		99.1933	98.8655	96.599	92.0534	108.764	93.165			97.5913	99.2321	93.7923	96.2846	115.023	96.1517	104.52	92.97	102.589	91.7692	101.63
56	478.765	290.908	343.762	706.844	316.773	559.498			296.951	378.869	469.93	624.629	481.87	576.812	828.585	630.204	1239.54	654.183	388.399		96.3781	102.929	95.4006	91.9486	103.804	99.1215			96.4367	99.396	95.8881	97.9313	115.546	98.9945	107.174	90.7252	105.462	83.8754	82.7108
57	531.949	270.008	326.062	726.298	310.176	571.96			334.821	377.989	463.3	643.759	482.818	566.492	812.579	641.556	1257.04	621.209	371.775		107.084	95.534	90.4887	94.4792	101.642	101.329			108.735	99.1652	94.5353	100.931	115.774	97.2234	105.104	92.3594	106.952	79.6477	79.1706
58	515.337	262.963	322.401	717.346	322.262	580.46			347.918	386.09	439.625	647.136	490.113	553.798	833.342	667.754	1261.66	666.11	369.811		103.74	93.0414	89.4727	93.3148	105.603	102.835			112.988	101.29	89.7044	101.46	117.523	95.0448	107.79	96.1309	107.345	85.4046	78.7524
59	490.936	269.24	316.963	756.86	306.95	586.391			342.818	387.898	450.728	647.408	497.813	565.924	793.535	677.454	1269.89	660.159	380.893		98.8281	95.2624	87.9634	98.4548	100.585	103.886			111.332	101.765	91.97	101.503	119.369	97.126	102.641	97.5273	108.045	84.6415	81.1123
60	498.659	283.907	321.047	736.357	300.566	579.078			337.788	383.53	431.548	639.867	489.752	535.415	776.71	660.744	1245.57	725.174	341.471		100.383	100.452	89.097	95.7877	98.493	102.59			109.699	100.619	88.0564	100.32	117.436	91.8899	100.464	95.1217	105.976	92.9774	72.7173
61	494.909	280.641	331.939	755.944	330.012	591.198			320.222	386.207	436.215	648.027	478.393	561.031	806.953	659.287	1193.14	677.95	348.113		99.628	99.2962	92.1194	98.3357	108.142	104.738			103.994	101.321	89.0086	101.6	114.713	96.2862	104.376	94.912	101.515	86.9226	74.1317
62	490.961	287.221	342.051	742.728	340.211	588.614			323.279	394.551	426.708	651.951	482.543	536.662	813.577	591.819	1231.92	698.725	344.616		98.8333	101.624	94.9258	96.6164	111.484	104.28			104.987	103.51	87.0688	102.215	115.708	92.1038	105.233	85.1991	104.814	89.5863	73.387
63	464.426	296.375	329.935	719.57	330.547	582.2			339.799	393.308	434.1	641.66	472.644	537.991	818.993	592.199	1217.06	738.042	294.565		93.4916	104.863	91.5633	93.604	108.318	103.143			110.352	103.184	88.577	100.602	113.334	92.332	105.934	85.2539	103.55	94.6273	62.7285
64	508.971	311.703	339.269	759.74	325.605	555.331			323.611	374.331	448.583	623.541	480.748	559.864	830.432	665.138	1223.3	772.811	329.786		102.459	110.287	94.1539	98.8295	106.698	98.3833			105.095	98.2054	91.5324	97.7607	115.277	96.0859	107.413	95.7543	104.081	99.0851	70.229
65	537.257	292.36	348.466	756.046	322.814	548.826			327.503	375.32	427.182	631.289	474.91	526.282	820.522	656.345	1214.48	773.633	420.665		108.153	103.443	96.7061	98.3489	105.783	97.2308			106.359	98.465	87.1654	98.9755	113.877	90.3224	106.131	94.4884	103.33	99.1905	89.5818
66	553.014	282.015	342.505	761.215	331.804	575.135			323.099	383.102	439.549	602.628	481.066	526.139	821.992	674.75	1220.57	775.794	480.27		111.325	99.7824	95.0519	99.0214	108.729	101.892			104.928	100.507	89.689	94.482	115.354	90.2978	106.321	97.138	103.849	99.4676	102.275
67	509.215	287.86	350.871	766.206	318.331	584.174			331.829	386.958	445.977	612.413	495.73	542.869	829.327	660.102	1276.06	772.778	491.655		102.508	101.85	97.3735	99.6705	104.314	103.493			107.763	101.518	91.0005	96.016	118.87	93.1692	107.27	95.0293	108.57	99.0809	104.7
68	513.301	276.149	330.802	722.488	313.2	570.843			333.285	384.177	408.233	630.533	502.498	534.292	778.781	638.302	1210.53	753.281	492.42		103.33	97.7067	91.804	93.9836	102.633	101.131			108.236	100.788	83.2989	98.8569	120.493	91.6971	100.732	91.8909	102.994	96.5811	104.862
69	527.407	286.695	315.376	783.128	294.545	565.274			346.497	382.417	416.964	616.217	499.1	530.743	787.734	659.435	1222.01	768.423	531.024		106.17	101.438	87.5229	101.872	96.52	100.145			112.527	100.327	85.0806	96.6124	119.678	91.088	101.89	94.9332	103.971	98.5225	113.083
70	539.259	304.199	335.658	760.914	302.004	564.595			327.418	389.727	396.151	609.309	514.284	548.796	802.424	643.503	1204.41	764.394	503.641		108.556	107.631	93.1516	98.9822	98.9641	100.024			106.331	102.245	80.8337	95.5293	123.319	94.1863	103.79	92.6397	102.474	98.006	107.252
71	515.452	304.606	339.091	730.767	325.363	575.72			315.045	384.383	362.13	604.31	492.466	510.896	820.288		1208.33	763.279	519.84		103.763	107.776	94.1043	95.0606	106.619	101.995			102.313	100.843	73.8918	94.7456	118.087	87.6818	106.101		102.807	97.863	110.701
72	502.128	320.986	379.361	745.059	312.045	570.761			329.686	365.651	390.495	620.447	513.987	533.813	801.5		1189.41	734.071	488.766		101.081	113.571	105.28	96.9197	102.255	101.117			107.068	95.9285	79.6795	97.2756	123.248	91.6148	103.671		101.197	94.1181	104.084
73	514.215	330.29	351.955	763.526	311.497	565.142			334.361	370.182	423.396	623.404	481.199	541.645	811.926		1182.25	658.904	515.499		103.514	116.863	97.6744	99.3219	102.075	100.121			108.586	97.1172	86.393	97.7392	115.386	92.9591	105.019		100.588	84.4807	109.777
74	505.598	320.206	349.688	745.83	335.527	588.162			310.009	380.367	456.367	618.542	497.153	534.681	834.643		1189.42	658.121	495.458		101.78	113.295	97.0453	97.02	109.949	104.2			100.677	99.7889	93.1207	96.9769	119.211	91.7638	107.958		101.198	84.3802	105.509
75	520.846	305.512	358.511	749.603	355.578	556.981			306.916	364.199	460.044	648.496	488.344	530.292	809.966		1136.72	663.114	519.455		104.849	108.096	99.4937	97.5108	116.52	98.6757			99.6726	95.5475	93.8708	101.673	117.099	91.0106	104.766		96.7145	85.0205	110.62
76	516.517	326.767	361.175	715.665	326.392				314.238	368.854	478.477	648.936	474.257	528.858	809.415		1092.42	649.598	524.98		103.978	115.617	100.233	93.096	106.956				102.051	96.7687	97.632	101.742	113.721	90.7646	104.695		92.9455	83.2875	111.796
77	539.698	309.312	353.792	767.983	321.262				319.899	341.332	449.666	630.781	505.31	555.829	827.056		1097.59	621.007	504.646		108.644	109.441	98.1842	99.9017	105.275				103.889	89.5484	91.7533	98.8958	121.167	95.3934	106.976		93.385	79.6218	107.466
78	528.446	319.671	366.734	740.821	342.967				316.332	377.179	477.434	637.751	480.221	536.7	836.402		1089.18	647.454	516.003		106.379	113.106	101.776	96.3684	112.388				102.731	98.9527	97.4192	99.9886	115.151	92.1104	108.185		92.6702	83.0126	109.885
79	516.546	316.568	351.312	743.937	340.807				325.357	343.915	451.541	617.581	456.554	501.886	838.751		1103.71	658.936	505.942		103.984	112.008	97.496	96.7738	111.68				105.661	90.226	92.1359	96.8262	109.476	86.1354	108.489		93.9061	84.4847	107.742
80	540.878	312.28	355.627	753.497	331.588				342.992	362.797	449.776	597.037	444.167	520.081	844.706		1255.59	676.746	518.451		108.882	110.491	98.6934	98.0174	108.659				111.389	95.1795	91.7757	93.6053	106.506	89.2583	109.259		106.828	86.7683	110.406
81	529.618	310.366	355.76	718.739	315.601				337.589	348.02	463.631	620.405	421.893	506.747	860.472		1252.52				106.615	109.814	98.7303	93.4959	103.42				109.634	91.3028	94.6028	97.269	101.165	86.9698	111.299		106.567
82	511.548	277.597	351.102	743.198	315.453				333.023	361.602	466.631	586.397	425.717	516.231	845.826		1290.22				102.977	98.2192	97.4376	96.6776	103.371				108.151	94.866	95.215	91.9372	102.082	88.5974	109.404		109.775
83	529.637	281.221	344.489	791.188	324.306				334.024	361.876	472.782	603.21	432.725	534.967	895.82		1217.26				106.619	99.5013	95.6024	102.92	106.272				108.476	94.9379	96.47	94.5732	103.762	91.8129	115.871		103.567
84	529.146	287.891	358.071	749.816	334.583				332.052	303.092	456.452	619.417	429.966	512.09	877.764		1206.82				106.52	101.861	99.3718	97.5385	109.64				107.836	79.516	93.1379	97.1142	103.1	87.8867	113.535		102.679
85	508.725	298.369	355.904	798.595	329.389				337.271	272.5	467.506	601.966	432.471	527.225	857.187		1217.38				102.409	105.569	98.7704	103.884	107.938				109.531	71.4902	95.3936	94.3781	103.701	90.4843	110.874		103.577
86	509.557	294.655	354.314	756.425	334.434				308.316	283.755	453.751	631.798	483.353	518.935	897.298		1309.51				102.577	104.255	98.329	98.3983	109.591				100.127	74.4429	92.5868	99.0553	115.902	89.0615	116.062		111.416
87	503.251	286.036	343.71	748.679	340.607				334.264	314.234	441.939	635.566	473.401	511.194			1337.67				101.307	101.205	95.3862	97.3906	111.614				108.554	82.4391	90.1765	99.646	113.516	87.733			113.812
88	424.54	301.515	346.64	775.94	321.011				326.203	357.804	424.784	637.264	473.172	531.333			1312.97				85.4623	106.682	96.1993	100.937	105.193				105.936	93.8696	86.6762	99.9122	113.461	91.1893			111.71
89	431.244	308.79	360.465	769.609	336.593				332.606	373.065	451.338	632.243	512.27	507.455			1309.46				86.8117	109.256	100.036	100.113	110.299				108.016	97.8733	92.0945	99.1251	122.836	87.0912			111.412
90	428.207	310.291	342.159	718.036	329.493				343.433	355.259	475.886	632.33	519.889	537.809			1303.05				86.2005	109.787	94.9557	93.4044	107.972				111.532	93.2021	97.1034	99.1387	124.663	92.3008			110.866
91	433.509	317.163	350.586	760.377	314.08				334.209	377.311	455.426	625.334	524.646	549			1234.96				87.2679	112.218	97.2944	98.9123	102.921				108.536	98.9873	92.9287	98.0418	125.804	94.2214			105.073
92	439.032	341.161	355.399	754.216	324.158				316.881	361.711	448.706	645.635	489.131	514.588			1264.51				88.3797	120.709	98.6302	98.1109	106.224				102.909	94.8946	91.5573	101.225	117.288	88.3155			107.587
93	463.722	352.955	359.332	758.073	352.479				313.701	377.439	455.023	655.147	486.894	531.061			1201.02				93.3498	124.882	99.7217	98.6125	115.504				101.876	99.021	92.8463	102.716	116.751	91.1426			102.185
94	469.786	351.24	361.55	756.473	348.171				291.34	351.087	448.211	633.301	450.677	514.681			1191.19				94.5705	124.276	100.337	98.4045	114.093				94.6143	92.1075	91.4563	99.291	108.067	88.3314			101.349
95	463.754	333.266	382.965	781.194	346.095				300.36	368.001	455.748	643.787	446.334	518.649			1209.14				93.3563	117.916	106.28	101.62	113.412				97.5436	96.5448	92.9944	100.935	107.025	89.0124			102.876
96	488.505	319.111	370.536	767.608	341.08				299.83	365.605	457.55	633.453	458.134	523.376			1191.8				98.3389	112.908	102.831	99.853	111.769				97.3715	95.9164	93.362	99.3147	109.855	89.8237			101.401
97	504.322	317.48	367.279	749.351	344.639				311.566	355.58	449.872	645.39	468.247	526.531			1184.12				101.523	112.331	101.927	97.478	112.935				101.183	93.2863	91.7952	101.186	112.28	90.3651			100.747
98	470.629	313.15	372.485	757.238	354.411				332.533	357.492	463.397	627.324	458.183	546.669			1194.15				94.7402	110.799	103.372	98.504	116.138				107.992	93.7878	94.5551	98.3538	109.867	93.8213			101.601
99	498.991	309.091	351.304	748.328	344.477				338.654	366.633	463.175	622.588	473.161	514.705			1246.82				100.45	109.362	97.4939	97.3449	112.882				109.98	96.186	94.5098	97.6113	113.458	88.3356			106.082
100	479.312	322.001	373.8	758.921	334.349				352.398	366.857	434.859	628.413	463.52	511.258			1223.09				96.4882	113.93	103.737	98.7229	109.563				114.443	96.2448	88.7319	98.5245	111.146	87.744			104.063
101	484.714		390.014	730.94	304.239				361.821	356.9	409.74	640.761	436.518	518.776			1212.98				97.5756		108.237	95.083	99.6965				117.504	93.6326	83.6064	100.461	104.672	89.0343			103.203
102	469.008		395.523	760.051	319.565				349.692	350.467	450.03	648.754	449.784	527.13			1234.77				94.414		109.765	98.87	104.719				113.565	91.9449	91.8275	101.714	107.852	90.4679			105.057
103	472.064		397.55	729.288	325.365				332.594	363.091	453.827	635.639	461.267	514.895			1252.37				95.0292		110.328	94.8682	106.619				108.012	95.2567	92.6022	99.6574	110.606	88.3682			106.554
104	489.314		404.405	741.541	324.174				302.925	368.115	467.104	641.8	485.204	512.357			1221.84				98.5017		112.23	96.4621	106.229				98.3765	96.5747	95.3114	100.623	116.346	87.9326			103.957
105	470.395		392.596	766.798	329.048				315.52	369.475	475.415	630.348	555.966	555.789			1222.63				94.6931		108.953	99.7475	107.826				102.467	96.9316	97.0073	98.8279	133.314	95.3865			104.024
106	456.969		387.278	750.038	324.244				300.748	364.432	459.848	643.542	517.297	527.266			1219.72				91.9904		107.477	97.5673	106.252				97.6698	95.6086	93.8308	100.896	124.041	90.4913			103.776
107	451.867		393.034	769.556	310.208				319.659	289.474	479.914	640.283	519.814	539.401			1215.1				90.9634		109.075	100.106	101.653				103.811	75.9433	97.9252	100.386	124.645	92.5739			103.383
108	477.555		393.705	746.462	314.928				292.942	319.229	453.17	617.351	532.121	547.803			1173.06				96.1345		109.261	97.1022	103.199				95.1347	83.7496	92.4681	96.7902	127.596	94.016			99.8061
109	468.306		383.375	778.277	298.624				294.512	339.669	453.004	628.029	501.252	536.871			1145.6				94.2727		106.394	101.241	97.8566				95.6445	89.1119	92.4345	98.4644	120.194	92.1398			97.4697
110	458.272		393.11	757.547	329.934				303.878	350.033	451.667	620.189	490.068	533.372			1060.52				92.2527		109.096	98.5442	108.117				98.6863	91.8309	92.1615	97.2351	117.512	91.5392			90.2309
111	446.692		365.029	724.355	332.162				308.512	378.644	460.575	644.515	463.05	542.412			1025.05				89.9216		101.303	94.2264	108.847				100.191	99.3371	93.9793	101.049	111.034	93.0906			87.2134

## Sheet: 0-0.5
	7	7	7	7	7	8	8	8	8	8	8	8	8	8		7	7	7	7	7	8	8	8	8	8	8	8	8	8
	10	12	13	15	19	1	5	6	9	10	13	19	20	24		10	12	13	15	19	1	5	6	9	10	13	19	20	24
1	326.107	614.43	530.044	436.834	418.393	452.756	336.656	512.969	535.296	424.719	702.784	424.481	630.547	585.142
2	354.157	639.973	549.096	433.521	444.748	459.654	350.467	536.36	550.865	433.574	739.857	442.425	655.457	577.49
3	332.61	629.879	541.614	439.323	453.518	454.819	337.493	534.354	550.864	449.356	733.355	449.15	638.609	571.605
4	358.756	664.652	536.74	429.884	468.244	464.121	350.575	538.411	554.987	454.428	740.388	436.86	660.408	587.863
5	355.989	661.017	549.335	439.927	456.427	478.084	346.625	534.851	572.338	472.093	738.103	459.699	638.936	582.012
6	360.994	649.461	565.055	455.558	468.597	472.598	365.027	532.486	587.513	453.326	761.66	464.803	647.805	565.802
7	365.397	633.912	549.079	452.629	470.76	476.1	356.622	546.698	590.532	459.802	753.154	447.762	642.752	605.072
8	364.121	633.827	546.541	479.594	472.83	499.248	361.024	564.494	583.644	444.036	749.519	470.136	653.175	568.086
9	357.433	641.869	560.259	474.611	481.689	487.44	346.703	569.92	579.182	477.233	757.644	479.61	634.361	590.401
10	371.759	635.129	580.947	467.952	466.781	490.617	353.575	585.571	595.307	474.005	752.608	475.088	645.095	579.453
11	369.327	640.477	566.561	467.954	474.673	510.27	356.35	606.994	594.306	491.305	772.062	471.507	635.469	593.383
12	369.862	646.139	586.5	476.556	468.15	496.805	372.583	589.989	581.789	488.179	760.121	476.278	645.369	604.779
13	380.922	644.801	576.019	464.275	483.74	488.558	349.882	597.631	586.7	465.281	760.541	502.004	653.739	602.502
14	390.475	651.448	569.226	489.772	470.9	493.105	341.618	598.71	607.104	505.444	762.644	504.266	675	619.212
15	391.576	668.83	565.29	476.087	488.429	488.175	346.852	586.872	596.844	489.535	775.676	515.931	677.73	612.572
16	380.48	662.642	588.714	499.959	450.899	511.829	358.948	573.061	594.91	486.104	788.34	506.409	702.358	612.832
17	396.951	660.167	584.121	499.647	466.373	507.463	364.534	594.584	589.062	484.795	796.433	502.088	695.772	582.027
18	397.206	640.575	587.819	501.133	461.545	524.812	354.704	582.935	599.585	478.161	791.141	515.103	687.883	606.324
19	377.993	659.888	579.768	506.172	470.295	517.062	361.094	598.367	611.629	484.653	804.886	529.532	674.698	600.58
20	378.738	658.357	577.174	504.829	460.167	523.272	369.904	570.513	599.009	472.318	809.563	544.034	676.131	592.06		100	100	100	100	100	100	100	100	100	100	100	100	100	100
21	376.874	655.444	594.151	494.925	463.819	518.826	359.607	573.502	587.023	489.401	814.213	539.316	698.105	617.973		99.5078	99.5575	102.941	98.0383	100.794	99.1503	97.2163	100.524	97.999	103.617	100.574	99.1329	103.25	104.377
22	378.525	647.102	605.842	504.357	473.042	517.628	340.306	577.783	595.981	488.974	817.305	517.131	688.615	584.209		99.9438	98.2904	104.967	99.9065	102.798	98.9214	91.9986	101.274	99.4946	103.526	100.956	95.0549	101.846	98.6738
23	375.842	656.886	607.497	508.068	449.839	515.497	351.26	570.216	614.056	472.008	820.885	523.622	675.199	600.031		99.2354	99.7766	105.254	100.642	97.7556	98.5142	94.9599	99.9479	102.512	99.9343	101.399	96.2481	99.8621	101.346
24	389.786	654.525	609.364	530.294	450.573	519.254	346.625	576.659	595.853	476.661	828.407	564.65	659.469	583.145		102.917	99.4179	105.577	105.044	97.9151	99.2321	93.7067	101.077	99.4731	100.92	102.328	103.789	97.5356	98.4942
25	375.043	665.788	610.894	517.679	459.346	532.401	354.176	588.418	605.397	467.148	807.439	542.696	680.525	583.528		99.0244	101.129	105.842	102.545	99.8215	101.745	95.7482	103.138	101.066	98.9053	99.7376	99.754	100.65	98.5588
26	364.253	671.827	602.407	515.6	486.207	504.667	356.614	575.886	613.337	483.184	829.934	522.04	679.246	589.003		96.1755	102.046	104.372	102.134	105.659	96.4445	96.4073	100.942	102.392	102.3	102.516	95.9572	100.461	99.4837
27	372.922	664.997	576.972	529.124	474.487	527.41	334.064	580.131	600.403	487.15	813.95	557.081	678.834	598.981		98.4644	101.009	99.9649	104.813	103.112	100.791	90.3109	101.686	100.233	103.14	100.542	102.398	100.4	101.169
28	375.64	663.074	602.638	513.452	465.172	530.82	353.706	582.036	621.813	476.715	825.345	556.199	655.548	589.214		99.182	100.716	104.412	101.708	101.088	101.442	95.621	102.02	103.807	100.931	101.949	102.236	96.9557	99.5193
29	372.665	656.003	606.834	508.479	464.428	543.345	350.537	582.428	620.812	485.703	841.897	552.747	665.265	605.758		98.3966	99.6423	105.139	100.723	100.926	103.836	94.7644	102.089	103.64	102.834	103.994	101.602	98.3928	102.314
30	370.901	650.746	606.223	518.575	461.918	540.741	349.551	559.102	605.061	470.465	831.578	548.529	694.387	573.073		97.9308	98.8439	105.033	102.723	100.381	103.339	94.4977	97.9998	101.01	99.6077	102.719	100.826	102.7	96.7931
31	378.052	656.913	614.597	510.123	467.732	558.677	351.332	565.062	615.225	460.115	817.014	544.742	694.758	569.854		99.8188	99.7806	106.484	101.049	101.644	106.766	94.9794	99.0445	102.707	97.4163	100.92	100.13	102.755	96.2494
32	367.671	656.947	593.149	515.181	478.959	552.269	350.492	567.381	602.957	471.202	843.074	556.237	707.033	593.245		97.0779	99.7857	102.768	102.051	104.084	105.542	94.7522	99.451	100.659	99.7636	104.139	102.243	104.57	100.2
33	362.287	661.511	609.192	508.868	478.904	569.27	344.343	567.852	599.004	490.151	836.18	543.715	692.182	586.456		95.6564	100.479	105.547	100.8	104.072	108.79	93.0899	99.5336	99.9991	103.776	103.288	99.9414	102.374	99.0534
34	340.408	665.713	606.284	511.509	481.767	562.09	361.866	551.961	601.23	472.519	847.486	567.054	668.467	567.029		89.8795	101.117	105.043	101.323	104.694	107.418	97.827	96.7483	100.371	100.043	104.684	104.231	98.8664	95.7722
35	349.095	644.972	594.349	518.837	481.955	563.618	347.971	573.048	607.256	448.34	828.061	556.468	651.603	592.757		92.1733	97.9669	102.976	102.775	104.735	107.71	94.0708	100.444	101.377	94.9233	102.285	102.285	96.3724	100.118
36	356.178	674.061	597.585	517.457	470.243	562.619	351.701	570.508	599.029	463.453	839.496	558.923	688.576	580.664		94.0433	102.385	103.536	102.501	102.19	107.519	95.079	99.9992	100.003	98.123	103.697	102.737	101.841	98.0751
37	351.771	690.993	602.87	515.833	487.002	562.261	342.492	568.342	604.034	466.884	838.344	559.753	683.239	592.543		92.8797	104.957	104.452	102.18	105.832	107.451	92.5894	99.6195	100.839	98.8494	103.555	102.889	101.051	100.082
38	360.946	684.971	599.288	521.07	475.822	578.566	355.074	557.019	599.024	459.027	836.167	550.781	657.321	622.401		95.3024	104.042	103.831	103.217	103.402	110.567	95.9909	97.6348	100.003	97.186	103.286	101.24	97.218	105.125
39	350.96	683.799	607.046	505.483	475.717	590.108	346.356	552.52	603.945	465.153	843.879	545.159	666.052	605.287		92.6656	103.864	105.176	100.13	103.379	112.773	93.6341	96.8461	100.824	98.4829	104.239	100.207	98.5093	102.234
40	371.005	701.362	585.047	516.806	478.415	588.289	343.857	551.262	595.644	477.952	822.532	562.916	685.136	605.28		97.9582	106.532	101.364	102.372	103.966	112.425	92.9584	96.6257	99.4382	101.193	101.602	103.471	101.332	102.233
41	353.288	678.103	608.954	501.304	481.848	590.904	345.146	557.159	622.521	479.733	850.849	543.921	687.211	601.291		93.2802	102.999	105.506	99.3018	104.712	112.925	93.3071	97.6593	103.925	101.57	105.1	99.9793	101.639	101.559
42	353.563	666.331	602.921	501.457	467.338	566.686	359.293	552.103	621.27	466.954	849.069	546.599	698.426	613.037		93.353	101.211	104.461	99.3321	101.558	108.297	97.1313	96.7731	103.716	98.8642	104.88	100.471	103.297	103.543
43	352.94	665.115	607.292	511.82	491.568	564.946	336.491	555.659	630.788	484.167	847.649	545.873	664.288	592.231		93.1883	101.026	105.218	101.385	106.824	107.964	90.9671	97.3964	105.305	102.509	104.705	100.338	98.2485	100.029
44	349.818	666.088	611.088	523.245	485.421	579.509	366.056	553.692	626.464	471.674	852.63	550.169	680.41	610.788		92.3641	101.174	105.876	103.648	105.488	110.747	98.9598	97.0516	104.583	99.8636	105.32	101.128	100.633	103.163
45	332.384	681.959	602.522	515.394	471.434	562.685	336.724	550.074	610.804	469.07	853.016	538.432	681.53	613.036		87.7608	103.585	104.392	102.093	102.448	107.532	91.0303	96.4174	101.969	99.3122	105.368	98.9704	100.798	103.543
46	345.382	668.325	598.123	501.575	482.518	576.442	353.076	559.983	602.839	472.085	840.798	542.883	688.072	598.623		91.1928	101.514	103.63	99.3556	104.857	110.161	95.4508	98.1543	100.639	99.9505	103.858	99.7885	101.766	101.108
47	341.752	682.246	616.78	521.061	501.781	565.844	352.483	543.911	618.571	476.72	849.813	555.207	688.16	607.779		90.2344	103.628	106.862	103.215	109.043	108.136	95.2904	95.3371	103.266	100.932	104.972	102.054	101.779	102.655
48	352.551	692.793	612.744	518.165	487.429	563.544	366.263	558.255	627.137	471.661	831.76	540.23	675.584	648.182		93.0857	105.231	106.163	102.642	105.924	107.696	99.0158	97.8514	104.696	99.8609	102.742	99.3008	99.9191	109.479
49	354.788	671.805	619.018	519.662	496.306	581.664	367.066	557.564	637.167	479.78	860.727	542.059	683.284	625.782		93.6765	102.043	107.25	102.938	107.853	111.159	99.2328	97.7303	106.37	101.58	106.32	99.637	101.058	105.696
50	339.733	663.446	612.041	503.589	495.306	575.601	348.341	559.635	626.952	473.371	843.923	550.124	689.939	612.844		89.7012	100.773	106.041	99.7543	107.636	110	94.1707	98.0933	104.665	100.223	104.244	101.119	102.042	103.51
51	359.933	673.246	599.891	518.965	492.446	563.979	357.276	557.11	610.565	474.399	845.242	549.244	688.191	631.643		95.0348	102.262	103.936	102.8	107.015	107.779	96.5862	97.6507	101.929	100.44	104.407	100.958	101.784	106.686
52	370.716	672.251	623.921	508.656	480.091	583.976	359.886	546.197	624.746	482.309	843.443	551.513	677.976	633.113		97.882	102.11	108.099	100.758	104.33	111.601	97.2918	95.738	104.297	102.115	104.185	101.375	100.273	106.934
53	371.304	675.911	593.078	516.226	476.873	573.412	366.162	551.974	620.255	472.403	856.197	534.137	676.272	624.05		98.0371	102.666	102.755	102.258	103.63	109.582	98.9885	96.7505	103.547	100.018	105.76	98.1808	100.021	105.403
54	368.959	702.57	604.161	512.808	484.103	572.446	360.545	540.34	627.748	480.516	847.215	545.996	666.406	625.566		97.4179	106.716	104.676	101.581	105.202	109.398	97.4699	94.7112	104.798	101.736	104.651	100.361	98.5617	105.659
55	368.441	704.985	602.173	516.984	488.873	569.767	341.752	568.093	635.556	484.272	856.365	537.625	680.217	649.947		97.2812	107.082	104.331	102.408	106.238	108.885	92.3895	99.5758	106.101	102.531	105.781	98.822	100.604	109.777
56	375.919	679.412	623.642	508.753	475.474	565.741	359.882	555.293	636.959	473.339	868.007	547.144	689.545	627.344		99.2558	103.198	108.051	100.777	103.326	108.116	97.2906	97.3322	106.336	100.216	107.219	100.572	101.984	105.959
57	394.454	670.997	609.619	494.485	479.142	587.404	353.838	569.148	641.583	500.576	842.567	545.85	695.595	606.251		104.149	101.92	105.621	97.9511	104.123	112.256	95.6569	99.7608	107.107	105.983	104.077	100.334	102.879	102.397
58	389.559	682.884	599.137	516.461	481.045	565.572	355.039	568.759	634.965	466.215	838.755	533.355	698.746	575.862		102.857	103.725	103.805	102.304	104.537	108.084	95.9814	99.6925	106.003	98.7078	103.606	98.0371	103.345	97.2642
59	384.136	687.379	602.057	520.791	490.818	569.158	349.296	564.832	635.613	479.052	834.416	538.174	680.49	580.103		101.425	104.408	104.311	103.162	106.661	108.769	94.4288	99.0043	106.111	101.426	103.07	98.9229	100.645	97.9804
60	381.466	699.608	603.748	502.915	495.727	569.783	353.081	563.625	641.424	478.807	873.506	558.084	675.263	602.248		100.72	106.266	104.604	99.6208	107.728	108.889	95.4522	98.7928	107.081	101.374	107.898	102.583	99.8717	101.721
61	384.327	687.87	610.244	494.113	482.847	589.603	355.63	573.086	616.009	469.732	870.108	514.512	693.023	584.168		101.476	104.483	105.73	97.8773	104.929	112.676	96.1413	100.451	102.838	99.4523	107.479	94.5736	102.498	98.667
62	392.347	696.658	632.071	513.877	497.547	589.008	356.774	569.36	618.762	471.292	858.008	545.3	672.309	624.563		103.593	105.818	109.511	101.792	108.123	112.562	96.4504	99.7979	103.298	99.7827	105.984	100.233	99.4347	105.49
63	387.058	688.304	610.395	507.029	483.515	589.333	356.243	562.522	640.918	488.26	855.704	550.78	666.153	634.454		102.197	104.549	105.756	100.436	105.074	112.625	96.3069	98.5993	106.996	103.375	105.699	101.24	98.5242	107.16
64	371.177	681.123	618.841	517.117	494.516	605.347	362.939	578.615	623.865	481.31	851.627		682.386	635.639		98.0035	103.458	107.219	102.434	107.464	115.685	98.1172	101.42	104.15	101.904	105.196		100.925	107.361
65	399.509	702.834	612.391	513.069	482.719	578.574	372.323	559.91	632.403	480.251	866.818		695.055	633.825		105.484	106.756	106.101	101.632	104.901	110.569	100.654	98.1416	105.575	101.679	107.072		102.799	107.054
66	402.172	689.657	610.245	509.947	478.222	573.574	355.609	565.219	646.053	485.799	878.843		660.913	607.183		106.187	104.754	105.73	101.014	103.924	109.613	96.1356	99.072	107.854	102.854	108.558		97.7492	102.554
67	398.97	697.127	612.308	510.608	495.891	567.053	366.924	563.085	615.992	485.463	832.984		680.052	605.245		105.342	105.889	106.087	101.145	107.763	108.367	99.1946	98.6981	102.835	102.783	102.893		100.58	102.227
68	403.827	695.373	613.581	507.35	482.965	564.854	354.142	557.557	618.46	488.949	853.421		676.983	587.698		106.624	105.622	106.308	100.499	104.954	107.947	95.7388	97.7291	103.247	103.521	105.417		100.126	99.2633
69	384.7	698.308	606.865	508.611	475.793	581.556	372.027	563.648	637.042	486.014	865.666		700.57	581.312		101.574	106.068	105.144	100.749	103.396	111.138	100.574	98.7968	106.349	102.9	106.93		103.615	98.1847
70	384.574	688.659	613.099	508.029	480.593	584.361	361.92	578.724	641.691	476.767	869.967		686.425	579.608		101.541	104.603	106.224	100.634	104.439	111.674	97.8417	101.439	107.125	100.942	107.461		101.522	97.8968
71	374.871	691.326	616.488	519.473	498.965	557.899	371.996	579.982	639.524	497.598	868.922		682.051	625.414		98.979	105.008	106.811	102.901	108.431	106.617	100.566	101.66	106.764	105.352	107.332		100.876	105.634
72	362.347	700.822	618.339	505.099	486.83	575.925	365.091	568.299	629.981	478.658	863.214		681.398	589.647		95.6723	106.45	107.132	100.053	105.794	110.062	98.699	99.6119	105.171	101.342	106.627		100.779	99.5924
73	375.171	692.764	607.216	527.954	483.585	581.143	364.871	562.766	643.09	475.294	849.267		671.136	613.327		99.0583	105.226	105.205	104.581	105.089	111.06	98.6396	98.6422	107.359	100.63	104.904		99.2612	103.592
74	373.241	680.184	600.136	499.194	479.547	571.374	375.307	568.386	645.602	486.099	844.185		695.52	637.901		98.5486	103.315	103.978	98.8839	104.211	109.193	101.461	99.6272	107.778	102.918	104.277		102.868	107.743
75	369.833	692.083	603.254	519.937	497.056	584.504	353.811	564.496	651.736	467.014	826.451		692.613	657.633		97.6488	105.123	104.519	102.993	108.017	111.702	95.6495	98.9454	108.802	98.877	102.086		102.438	111.075
76	377.174	697.302	608.045	515.77	481.408	577.774	382.606	548.918	626.55	479.3	875.42		695.223	643.428		99.587	105.915	105.349	102.167	104.616	110.416	103.434	96.2147	104.598	101.478	108.135		102.824	108.676
77	367.431	689.205	597.932	507.089	498.211	590.181	395.499	561.726	647.974	475.724	850.811		685.789	630.956		97.0146	104.685	103.596	100.448	108.268	112.787	106.919	98.4599	108.174	100.721	105.095		101.428	106.57
78	374.215	697.558	608.026	502.647	495.578	579.607	390.923	561.344	643.037	478.321	851.95		676.804	643.045		98.8058	105.954	105.345	99.5678	107.695	110.766	105.682	98.3928	107.35	101.271	105.236		100.1	108.611
79	383.952	687.298	615.608	511.356	488.484	564.493	389.749	554.738	624.849	494.299	849.208		699.714	678.869		101.377	104.396	106.659	101.293	106.154	107.878	105.365	97.235	104.314	104.654	104.897		103.488	114.662
80	364.03	690.392	607.666	520.107	492.444	587.847	395.777	549.833	653.989	483.782	831.938		694.721	697.036		96.1166	104.866	105.283	103.026	107.014	112.341	106.995	96.3752	109.179	102.427	102.764		102.75	117.731
81	381.894	697.334	595.703	506.195	490.916	582.553	406.163	551.801	639.001	476.675	866.115		685.95			100.833	105.92	103.21	100.271	106.682	111.329	109.802	96.7201	106.676	100.922	106.986		101.452
82	381.517	673.853	592.525	515.351	492.247	585.091	405.692	551.126	636.877	459.286	836.367		670.49			100.734	102.354	102.66	102.084	106.972	111.814	109.675	96.6019	106.322	97.2407	103.311		99.1657
83	373.664	695.695	610.602	497.216	484.76	557.781	395.718	550.809	629.716	486.587	830.66		685.581			98.6603	105.671	105.792	98.4921	105.344	106.595	106.979	96.5463	105.126	103.021	102.606		101.398
84	375.289	702.401	601.982	504.751	487.692	573.794	396.113	545.659	629.299	486.91	859.642		728.918			99.0892	106.69	104.298	99.9845	105.982	109.655	107.085	95.6436	105.057	103.089	106.186		107.807
85	373.44	709.247	592.209	516.608	481.684	580.992	400.924	567.554	627.456	485.26	875.299		707.197			98.6011	107.73	102.605	102.333	104.676	111.031	108.386	99.4814	104.749	102.74	108.12		104.595
86		712.492	597.116	521.391	494.814	585.793	401.023	564.402	627.92	484.625	846.323		701.959				108.223	103.455	103.281	107.529	111.948	108.413	98.9289	104.826	102.606	104.541		103.82
87		707.024	602.202	495.501	490.46	570.002	404.559	558.539	644.85	466.606	845.128		689.704				107.392	104.336	98.1523	106.583	108.93	109.369	97.9013	107.653	98.7905	104.393		102.007
88		696.622	601.037	507.785	485.2	566.217	403.824	570.398	614.269	483.63	858.02		673.637				105.812	104.134	100.586	105.44	108.207	109.17	99.9799	102.548	102.395	105.986		99.6311
89		682.912	631.482	510.667	478.819	616.934	420.669	570.384	617.952	485.195	837.973		702.617				103.73	109.409	101.156	104.053	117.899	113.724	99.9774	103.162	102.726	103.509		103.917
90		679.634	622.908	512.25	499.422	543.887	398.975	560.249	605.645	488.447	870.278		719.258				103.232	107.924	101.47	108.531	103.94	107.859	98.2009	101.108	103.415	107.5		106.379
91		680.22	604.418	514.086	498.248	578.609	419.96	565.318	613.471	488.789	875.577		731.723				103.321	104.72	101.834	108.276	110.575	113.532	99.0895	102.414	103.487	108.154		108.222
92		678.684	602.437	510.788	492.728	579.984	418.452	570.634	627.453	498.606	837.823		698.139				103.087	104.377	101.18	107.076	110.838	113.125	100.021	104.749	105.566	103.491		103.255
93		707.415	607.896	504.183	485.747	569.311	414.637	570.168	647.669	502.544	861.572		705.438				107.451	105.323	99.8721	105.559	108.798	112.093	99.9395	108.123	106.399	106.424		104.334
94		700.115	577.341	495.791	485.043	573.074	436.406	566.601	630.567	490.617	860.518		686.94				106.343	100.029	98.2097	105.406	109.518	117.978	99.3142	105.268	103.874	106.294		101.599
95		684.54	611.969	515.772	489.072	560.547	426.124	577.156	625.474	490.958	841.327		682.073				103.977	106.028	102.168	106.281	107.123	115.199	101.164	104.418	103.946	103.924		100.879
96		671.092	599.918	519.476	499.736	577.67	413.134	572.073	587.527	504.773	862.171		684.819				101.934	103.94	102.901	108.599	110.396	111.687	100.273	98.0831	106.871	106.498		101.285
97		660.882	587.261	512.375	484.312	562.519	413.578	579.844	635.083	519.66	830.031		711.543				100.384	101.748	101.495	105.247	107.5	111.807	101.636	106.022	110.023	102.528		105.237
98		668.662	592.934	525.053	496.847	579.265	419.884	578.103	621.654	507.719	836.933		713.473				101.565	102.73	104.006	107.971	110.701	113.512	101.33	103.78	107.495	103.381		105.523
99		681.348	602.746	503.648	505.347	571.165	409.491	599.713	616.876	508.09	871.181		692.139				103.492	104.431	99.7661	109.818	109.153	110.702	105.118	102.983	107.574	107.611		102.368
100		681.268	585.663	502.542	487.411	599.842	416.706	583.487	626.073	506.881	864.23		720.784				103.48	101.471	99.5471	105.921	114.633	112.653	102.274	104.518	107.318	106.753		106.604
101		694.598	600.091	514.245	494.72	612	424.879	590.582	631.623	502.736	877.331		713.035				105.505	103.97	101.865	107.509	116.956	114.862	103.518	105.445	106.44	108.371		105.458
102		679.366	571.23	511.992	496.088	582.244	421.139	595.863	605.335	501.764	858.608		694.5				103.191	98.9701	101.419	107.806	111.27	113.851	104.443	101.056	106.234	106.058		102.717
103		691.401	585.499	503.631	507.668	596.488	422.489	589.514	628.691	499.557	856.05		696.288				105.019	101.442	99.7628	110.323	113.992	114.216	103.331	104.955	105.767	105.742		102.981
104		702.458	597.24	517.765	488.266	563.426	426.01	573.267	626.187	485.155	836.262		681.488				106.699	103.477	102.562	106.106	107.674	115.168	100.483	104.537	102.718	103.298		100.792
105		664.666	598.523	505.202	481.822	553.984	425.242	591.279	627.851	481.702	878.557		691.714				100.958	103.699	100.074	104.706	105.869	114.96	103.64	104.815	101.987	108.522		102.305
106		676.252	597.066	521.185	484.448	575.474	419.266	580.12	625.337	511.778	844.875		694.771				102.718	103.446	103.24	105.277	109.976	113.345	101.684	104.395	108.355	104.362		102.757
107		679.97	594.92	508.256	494.854	589.228	407.936	589.606	612.351	510.703	849.106		715.757				103.283	103.075	100.679	107.538	112.605	110.282	103.347	102.227	108.127	104.884		105.861
108		692.987	571.003	499.231	494.075	565.866	400.897	588.226	620.027	492.312	844.711		698.933				105.26	98.9308	98.8912	107.369	108.14	108.379	103.105	103.509	104.233	104.342		103.372
109		701.797	591.597	519.768	497.701	590.667	398.891	605.68	611.002	506.84	850.646		725.328				106.598	102.499	102.959	108.157	112.88	107.837	106.164	102.002	107.309	105.075		107.276
110		689.916	596.671	521.63	495.012	583.662	411.886	598.757	597.819	509.765	849.965		700.733				104.793	103.378	103.328	107.572	111.541	111.349	104.951	99.8013	107.928	104.991		103.639
111		690.901	594.952	511.517	504.341	583.046	402.529	601.714	596.841	488.572	854.294		692.747				104.943	103.08	101.325	109.6	111.423	108.82	105.469	99.6381	103.441	105.525		102.457

## Sheet: 0.5-1
	7	7	7	7	7	7	8	8	8	8		7	7	7	7	7	7	8	8	8	8
	1	5	6	9	17	18	7	8	14	21		1	5	6	9	17	18	7	8	14	21
1	480.398	333.483	358.963	328.766	728.7	382.965	294.202	333.411	525.776	490.656
2	477.257	340.389	378.85	328.568	732.158	366.245	296.056	322.664	502.638	497.094
3	482.251	338.817	361.772	334.501	742.017	389.845	325.175	337.29	519.753	482.774
4	494.217	312.149	372.841	348.727	738.365	399.499	318.043	332.688	517.647	459.603
5	492.148	322.961	372.275	331.715	757.348	404.509	335.562	345.539	532.489	466.297
6	499.01	328.804	379.442	342.187	771.476	415.305	327.948	342.722	516.42	488.425
7	469.394	332.699	387.735	357.965	775.994	399.004	335.734	345.251	502.955	454.669
8	503.152	335.237	391.954	339.783	763.416	415.403	341	344.696	525.2	480.769
9	501.754	330.935	391.18	321.385	789.908	412.997	329.621	334.11	508.742	481.891
10	528.466	317.413	406.011	332.156	769.955	423.183	346.904	349.65	523.921	482.522
11	531.025	322.912	386.021	336.819	771.639	421.315	343.939	338.947	526.256	504.67
12	536.296	325.503	407.992	340.964	788.599	428.055	356.434	345.211	526.765	491.2
13	549.216	332.983	399.124	343.402	769.835	429.888	360.344	346.293	515.916	494.447
14	556.517	335.486	415.29	354.05	782.482	419.499	353.842	349.911	517.673	496.433
15	573.799	329.28	420.174	351.762	808.591	433.679	352.534	366.048	519.642	499.994
16	572.499	357.164	410.266	349.119	823.448	436.643	376.172	355.208	525.227	501.49
17	566.031	347.957	414.517	345.605	830.947	427.356	358.544	356.645	525.739	507.649
18	565.595	369.669	404.088	362.342	845.139	426.126	376.847	345.796	510.778	510.492
19	565.774	356.233	432.168	353.437	831.091	425.263	362.693	361.444	531.336	523.018
20	575.984	357.57	422.632	370.706	818.387	434.018	367.394	371.491	534.472	512.386		100	100	100	100	100	100	100	100	100	100
21	570.132	390.289	434.679	367.891	793.479	436.59	370.912	377.486	550.218	514.063		98.984	109.15	102.851	99.2405	96.9565	100.593	100.958	101.614	102.946	100.327
22	580.74	399.215	416.028	345.353	794.04	423.487	392.618	377.58	552.664	522.233		100.826	111.647	98.4374	93.1608	97.025	97.5737	106.866	101.639	103.404	101.922
23	578.847	381.233	412.408	369.449	801.049	426.809	378.626	385.427	535.247	520.834		100.497	106.618	97.581	99.6608	97.8815	98.3392	103.057	103.751	100.145	101.649
24	590.534	386.354	419.554	364.664	815.208	416.862	366.783	360.719	547.485	506.058		102.526	108.05	99.2718	98.3701	99.6116	96.0473	99.8337	97.1004	102.435	98.765
25	591.242	388.293	431.038	345.705	818.498	404.038	373.38	401.701	533.384	523.085		102.649	108.592	101.989	93.2557	100.014	93.0925	101.629	108.132	99.7964	102.088
26	579.319	386.917	423.741	356.391	828.947	398.19	376.084	404.577	527.279	526.184		100.579	108.207	100.262	96.1383	101.29	91.7451	102.366	108.906	98.6541	102.693
27	594.476	372.722	424.679	365.907	830.871	410.1	357.099	397.24	540.443	519.315		103.21	104.237	100.484	98.7053	101.525	94.4892	97.198	106.931	101.117	101.352
28	601.278	377.135	430.466	366.222	825.577	413.519	378.533	390.658	542.177	540.996		104.391	105.472	101.854	98.7903	100.879	95.2769	103.032	105.159	101.442	105.584
29	613.27	368.637	434.254	368.43	827.669	418.789	388.224	379.31	540.506	535.127		106.473	103.095	102.75	99.3859	101.134	96.4912	105.67	102.105	101.129	104.438
30	605.402	369.24	429.517	368.689	839.779	411.975	376.963	387.689	545.314	526.715		105.107	103.264	101.629	99.4559	102.614	94.9212	102.605	104.36	102.029	102.797
31	605.695	375.244	428.294	352.523	835.993	434.394	390.804	383.607	535.121	548.97		105.158	104.943	101.34	95.095	102.151	100.087	106.372	103.262	100.121	107.14
32	619.491	378.335	418.772	360.358	837.954	448.318	372.422	411.171	534.188	546.308		107.553	105.807	99.0866	97.2085	102.391	103.295	101.369	110.681	99.9469	106.62
33	608.327	373.796	426.16	367.625	860.12	433.405	374.181	398.113	532.44	531.43		105.615	104.538	100.835	99.1689	105.099	99.8587	101.848	107.166	99.6198	103.717
34	626.788	369.483	435.478	373.115	849.033	422.345	393.045	410.466	518.684	525.565		108.82	103.332	103.04	100.65	103.745	97.3106	106.982	110.491	97.046	102.572
35	611.166	363.151	446.065	366.49	855.008	425.662	382.508	414.184	518.11	553.796		106.108	101.561	105.545	98.8625	104.475	98.0749	104.114	111.492	96.9386	108.082
36	618.414	370.723	441.297	354.564	876.048	424.818	388.626	402.845	524.041	548.23		107.367	103.679	104.416	95.6454	107.046	97.8804	105.779	108.44	98.0484	106.995
37	620.957	372.256	444.086	367.496	850.569	416.325	378.568	420.572	523.508	540.952		107.808	104.107	105.076	99.1341	103.932	95.9236	103.042	113.212	97.9486	105.575
38	609.628	354.482	432.315	370.471	887.625	401.902	367.94	395.395	510.67	551.102		105.841	99.1365	102.291	99.9365	108.46	92.6005	100.149	106.435	95.5466	107.556
39	616.129	354.923	421.354	347.874	845.122	394.85	378.365	374.321	503.539	552.992		106.97	99.2597	99.6975	93.8409	103.267	90.9756	102.986	100.762	94.2124	107.925
40	617.109	354.183	429.218	349.669	858.049	403.183	373.811	375.337	525.547	535.395		107.14	99.0527	101.558	94.3251	104.846	92.8955	101.747	101.035	98.33	104.49
41	614.893	366.551	434.157	347.927	870.845	396.938	370.1	378.968	529.305	537.931		106.755	102.512	102.727	93.8551	106.41	91.4567	100.737	102.013	99.0332	104.986
42	611.434	346.522	435.827	349.517	857.368	398.445	370.246	395.393	541.476	564.333		106.155	96.9102	103.122	94.2839	104.763	91.8038	100.776	106.434	101.311	110.138
43	615.94	358.931	426.463	346.828	883.071	384.251	359.443	372.915	537.177	549.819		106.937	100.381	100.907	93.5587	107.904	88.5335	97.8358	100.383	100.506	107.306
44	606.351	345.574	437.027	364.947	867.559	399.424	354.716	379.988	522.194	544.767		105.272	96.6453	103.406	98.4463	106.008	92.0293	96.5493	102.287	97.7027	106.32
45	595.722	364.138	426.459	349.838	865.221	406.741	369.781	378.63	529.946	558.541		103.427	101.837	100.905	94.3706	105.723	93.7153	100.65	101.922	99.1531	109.008
46	616.241	386.236	425.885	376.235	885.743	396.632	363.586	380.977	530.652	556.878		106.989	108.017	100.77	101.491	108.23	91.3862	98.9636	102.553	99.2853	108.683
47	600.294	391.818	424.078	371.763	863.589	395.085	367.543	380.977	524.385	558.412		104.221	109.578	100.342	100.285	105.523	91.0297	100.041	102.553	98.1127	108.983
48	594.669	397.487	419.47	363.739	830.701	393.589	393.544	387.989	516.771	571.485		103.244	111.163	99.2518	98.1205	101.505	90.6851	107.118	104.441	96.6882	111.534
49	618.572	386.378	423.057	361.125	875.094	411.9	391.451	378.66	543.075	572.661		107.394	108.057	100.1	97.4155	106.929	94.9039	106.548	101.93	101.61	111.764
50	628.154	378.14	432.477	355.404	891.358	431.777	363.527	373.184	545.259	568.506		109.058	105.753	102.329	95.8722	108.916	99.4837	98.9475	100.456	102.018	110.953
51	626.641	372.606	424.505	365.258	878.689	427.549	414.164	392.534	531.733	563.061		108.795	104.205	100.443	98.5304	107.368	98.5095	112.73	105.664	99.4875	109.89
52	628.45	393.124	406.2	355.014	878.484	454.52	411.165	386.449	508.121	562.832		109.109	109.943	96.1119	95.7668	107.343	104.724	111.914	104.026	95.0698	109.845
53	627.78	389.039	425.592	359.908	879.815	460.397	403.391	381.321	491.704	570.885		108.993	108.801	100.7	97.087	107.506	106.078	109.798	102.646	91.9981	111.417
54	626.35	389.268	414.268	370.415	880.268	453.071	388.221	385.247	472.947	564.581		108.744	108.865	98.021	99.9215	107.561	104.39	105.669	103.703	88.4886	110.187
55	620.419	392.269	441.442	382.525	878.371	458.109	382.642	393.396	455.574	556.838		107.715	109.704	104.451	103.188	107.33	105.551	104.15	105.896	85.238	108.675
56	592.969	380.664	419.267	375.061	869.755	439.555	409.853	387.757	494.387	560.028		102.949	106.459	99.2038	101.175	106.277	101.276	111.557	104.378	92.5	109.298
57	597.302	363.372	423.97	374.646	890.075	421.769	412.45	382.553	473.847	561.125		103.701	101.623	100.317	101.063	108.76	97.1779	112.264	102.978	88.6571	109.512
58	641.368	389.985	433.437	367.948	898.555	436.605	424.391	380.818	469.376	526.3		111.352	109.065	102.557	99.2559	109.796	100.596	115.514	102.511	87.8206	102.716
59	607.17	370.943	414.054	362.872	893.924	431.272	399.082	377.568	459.688	543.246		105.414	103.74	97.9703	97.8867	109.23	99.3674	108.625	101.636	86.008	106.023
60	596.11	358.188	433.976	357.089	888.586	426.903	411.543	373.222	447.66	548.486		103.494	100.173	102.684	96.3265	108.578	98.3608	112.017	100.466	83.7574	107.045
61	604.254	403.449	417.523	366.024	883.036	431.737	392.668	383.997	461.129	544.849		104.908	112.831	98.7912	98.737	107.9	99.4744	106.879	103.366	86.2774	106.336
62	609.303	382.584	397.434	358.724	870.977	434.742	408.787	378.784	469.334	544.132		105.785	106.996	94.0379	96.7676	106.426	100.167	111.267	101.963	87.8127	106.196
63	607.938	388.451	430.575	350.759	849.833	405.923	388.624	388.365	527.16	558.405		105.548	108.637	101.879	94.6191	103.842	93.5269	105.779	104.542	98.632	108.981
64	627.913	396.617	431.501	366.912	845.573	425.319	387.65	384.822	537.962	538.175		109.016	110.92	102.099	98.9765	103.322	97.9958	105.513	103.589	100.653	105.033
65	620.374	380.674	427.519	381.237	835.914	427.809	391.821	384.298	515.204			107.707	106.461	101.156	102.841	102.142	98.5695	106.649	103.447	96.3949
66	620.026	389.731	422.851	365.746	842.45	436.85	383.769	392.323	498.279			107.646	108.994	100.052	98.662	102.94	100.652	104.457	105.608	93.2282
67	609.279	385.002	432.57	365.828	835.09	435.601	379.527	389.506	482.418			105.781	107.672	102.351	98.6839	102.041	100.365	103.302	104.849	90.2607
68	605.362	365.143	420.741	351.189	845.313	419.016	391.552	377.504	469.415			105.1	102.118	99.5525	94.735	103.29	96.5435	106.576	101.619	87.8278
69	618.617	364.235	445.303	361.097	857.122	418.379	385.989	364.753	448.301			107.402	101.864	105.364	97.4077	104.733	96.3968	105.061	98.1861	83.8773
70	614.764	362.183	412.993	374.152	835.005	435.661	388.424	380.391	459.574			106.733	101.29	97.7192	100.929	102.031	100.379	105.724	102.396	85.9866
71	622.13	390.564	412.88	381.481	835.604	428.443	386.695	383.746	488.373			108.012	109.227	97.6926	102.907	102.104	98.7155	105.254	103.299	91.3748
72	634.906	359.452	431.489	357.122	847.936	422.905	389.013	375.379	476.228			110.23	100.526	102.096	96.3354	103.611	97.4397	105.884	101.047	89.1026
73	635.634	368.533	424.807	370.851	854.503	438.96	377.909	372.329	481.141			110.356	103.066	100.515	100.039	104.413	101.139	102.862	100.226	90.0218
74	635.228	384.936	441.061	359.153	833.624	436.066	387.753	384.118	495.829			110.286	107.653	104.36	96.8834	101.862	100.472	105.542	103.399	92.7698
75	648.494	375.776	430.553	354.029	869.579	433.5	388.444	388.119	491.153			112.589	105.092	101.874	95.5013	106.255	99.8808	105.73	104.476	91.8949
76	638.807	400.037	430.938	375.422	890.044	439.131	398.398	406.078	534.924			110.907	111.877	101.965	101.272	108.756	101.178	108.439	109.31	100.084
77	636.416	382.763	419.349	362.106	887.058	446.226	380.366	395.588	552.597			110.492	107.046	99.2232	97.68	108.391	102.813	103.531	106.487	103.391
78	641.542	399.645	420.53	365.896	871.731	444.793	383.866	405.68	562.307			111.382	111.767	99.5026	98.7025	106.518	102.483	104.483	109.203	105.208
79	634.404	373.199	412.011	391.361	898.679	438.955	392.404	383.638	551.945			110.143	104.371	97.487	105.572	109.811	101.137	106.807	103.27	103.269
80	633.569	393.589	406.659	380.811	878.582	434.218	391.647	415.419	566.056			109.998	110.073	96.2205	102.726	107.355	100.046	106.602	111.825	105.909
81	604.588	370.674	406.788	361.012	886.085	443.863	399.687	415.523	583.654			104.966	103.665	96.2511	97.3848	108.272	102.268	108.79	111.853	109.202
82	630.535	394.753	397.259	360.298	850.179	427.285	393.704	415.444	562.26			109.471	110.399	93.9965	97.1924	103.885	98.4488	107.161	111.832	105.199
83	615.524	383.853	392.415	342.198	842.501	420.31	385.398	438.137	554.453			106.865	107.35	92.8502	92.3098	102.947	96.8417	104.901	117.94	103.738
84	629.945	382.741	395.23	360.12	854.474	419.629	381.962	402.236	553.343			109.369	107.04	93.5164	97.1442	104.41	96.6848	103.965	108.276	103.531
85	620.658	378.691	390.827	334.988	859.931	425.197	378.564	398.665	578.997			107.756	105.907	92.4745	90.3647	105.076	97.9676	103.04	107.315	108.331
86	651.188	372.141	423.59	369.256	879.251	439.668	366.126	407.203	556.394			113.057	104.075	100.227	99.6087	107.437	101.302	99.6549	109.613	104.102
87	635.837	373.078	400.498	391.078	852.88	435.015	374.244	408.284	539.145			110.392	104.337	94.7629	105.495	104.215	100.23	101.865	109.904	100.874
88	618.63	375.244	385.452	367.949	870.637	421.51	368.904	387.484	532.878			107.404	104.943	91.2027	99.2563	106.385	97.1181	100.411	104.305	99.7018
89	616.388	362.424	406.68	354.041	862.31	423.124	377.944	384.507	504.19			107.015	101.357	96.2255	95.5043	105.367	97.4899	102.872	103.504	94.3343
90	582.642	394.609	414.608	365.683	859.529	427.058	366.116	403.462	503.247			101.156	110.358	98.1014	98.645	105.027	98.3965	99.6521	108.606	94.1577
91	587.782	392.682	410.601	373.998	873.185	439.536	357.388		490.521			102.048	109.82	97.1532	100.888	106.696	101.272	97.2766		91.7768
92	593.619	396.525	405.544	331.834	841.985	441.18	370.174		498.319			103.062	110.894	95.9567	89.514	102.883	101.65	100.757		93.2358
93	606.002	401.95	416.222	331.371	862.584	453.949	373.206		508.046			105.212	112.412	98.4832	89.3891	105.401	104.592	101.582		95.0557
94	595.703	384.992	404.951	307.593	871.064	441.304	369.483		497.254			103.424	107.669	95.8165	82.9748	106.437	101.679	100.569		93.0365
95	600.739	394.723	423.858	322.452	882.154	441.823	370.303		497.569			104.298	110.391	100.29	86.9831	107.792	101.798	100.792		93.0955
96	602.248	374.408	412.21	363.888	853.973	423.459	377.587		493.11			104.56	104.709	97.5339	98.1606	104.348	97.5671	102.775		92.2611
97	594.273	377.669	416.406	357.957	853.877	443.349	381.887		490.189			103.175	105.621	98.5269	96.5607	104.337	102.15	103.945		91.7147
98	602.564	393.925	430.749	343.519	849.013	442.751	370.963		513.748			104.615	110.167	101.921	92.6659	103.742	102.012	100.971		96.1225
99	600.698	374.339	412.846	341.693	851.705	434.759	385.123		515.524			104.291	104.69	97.6846	92.1736	104.071	100.171	104.826		96.4549
100	591.612	375.022	442.198	328.204	832.414	435.232	394.435		541.839			102.713	104.881	104.63	88.5347	101.714	100.28	107.36		101.378
101	597.089	366.049		350.256	864.426	441.264	382.595		548.048			103.664	102.371		94.4835	105.626	101.669	104.138		102.54
102	606.825	361.222		372.975	837.7	446.436	365.47		540.509			105.355	101.021		100.612	102.36	102.861	99.4765		101.13
103	602.976	374.71		348.39	871.06	456.086	393.708		576.18			104.686	104.793		93.98	106.436	105.085	107.162		107.804
104	602.281	359.087		325.737	890.23	444.338	386.47		564.046			104.566	100.424		87.8693	108.779	102.378	105.192		105.533
105	591.853	380.812		343.619	883.382	430.484	381.136		522.361			102.755	106.5		92.6929	107.942	99.1859	103.74		97.734
106	619.974	383.655		347.134	856.297	428.973	387.074		558.878			107.637	107.295		93.6411	104.632	98.8377	105.357		104.566
107	629.176	387.793		335.014	866.555	427.098	382.335		538.014			109.235	108.452		90.3718	105.886	98.4058	104.067		100.663
108	628.008	390.689		335.173	887.901	435.319	408.22		547.605			109.032	109.262		90.4146	108.494	100.3	111.112		102.457
109	630.099	395.502		330.958	871.563	451.833	401.603		547.102			109.395	110.608		89.2777	106.498	104.105	109.311		102.363
110	601.015	416.876		339.758	881.114	455.18	406.642		527.143			104.346	116.586		91.6514	107.665	104.876	110.683		98.6287
111	628.018	395.953		327.645	888.328	453.474	401.738		530.469			109.034	110.735		88.3839	108.546	104.483	109.348		99.251
