# Supplementary material for: A mechano-osmotic feedback couples cell volume to the rate of cell deformation
Source: eLife journal article supplement (doi:10.7554/elife.72381), 2022-04-13
Supplement: supp [file PLL-PEG_V.xlsx]

## Sheet: PEG 1
1	1	1	1	1	1	1	1	1	1	1	1	3	3	3	4	4	5	5	5	5	5	6	6	6	6	6	6	6	6	6	6	7	7	7	7	7	8	8	8	8	8	8	8	9	9	9
100	100	100	100	100	100	100	100	100	100	100	100	100	100	100	100	100	100	100	100	100	100	100	100	100	100	100	100	100	100	100	100	100	100	100	100	100	100	100	100	100	100	100	100	100	100	100		100	4.276e-16
100.108	98.9307	98.4592	98.9471	99.6463	101.968	98.8385	101.503	98.9191	99.2123	101.332	101.305	100.332	99.7037	100.423	99.2096	99.7149	99.586	99.2072	99.6192	99.3569	99.3126	100.296	99.8242	99.8985	99.5349	99.8088	100.525	100.009	99.5675	100.579	101.505	99.3636	100.714	100.504	99.1129	99.3935	102.277	99.3703	99.6911	98.5025	99.1628	99.7717	100.262	99.8933	99.3389	100.1		99.8859	0.125474
103.339	98.5928	98.5914	98.9994	100.006	103.415	99.5887	101.909	99.4541	100.559	102.82	102.028	99.5304	100.282	100.772	100.012	100.765	99.0426	100.987	98.961	99.556	99.4742	100.925	99.9813	99.5379	99.7946	100.405	100.085	99.9056	99.4917	101.007	101.149	100.554	102.434	101.004	98.6921	99.9578	102.067	98.8568	100.072	98.5919	98.7072	99.3666	99.8462	99.9123	100.558	101.884		100.287	0.180162
103.733	99.0197	98.2519	99.2992	99.5253	105.165	98.98	101.926	97.5355	102.525	104.757	103.735	98.4075	99.6834	101.35	100.362	99.1858	97.94	99.8229	99.0293	100.066	98.1603	100.297	101.251	97.7542	98.476	100.056	99.9868	99.3486	98.5558	99.5573	100.985	99.9204	101.223	100.563	98.3231	100.23	101.649	98.5653	99.0266	96.0404	98.9402	99.6364	99.1945	99.9685	100.682	100.908		99.9915	0.26486
103.331	98.309	98.063	99.004	99.6034	106.194	99.1388	103.36	96.8516	102.995	104.445	104.534	98.8312	98.7113	101.869	100.377	98.7234	97.6747	99.1969	99.4185	99.1622	98.5731	100.112	100.133	96.6772	98.053	99.8867	99.7922	99.3274	98.6839	99.2942	101.884	100.199	101.143	101.785	98.3109	100.812	101.913	97.8182	99.1362	93.518	98.8035	99.7592	98.2389	99.8484	100.165	100.783		99.8818	0.323263
103.171	98.7656	96.6551	98.9285	99.1034	106.218	98.6315	103.072	97.1452	104.18	103.424	103.188	98.258	97.6418	101.352	101.367	98.5314	98.1393	100.321	98.537	99.8267	98.1064	100.883	99.3247	96.6604	97.5557	99.5379	99.5642	100.199	97.9743	99.4051	101.878	100.187	101.115	101.016	98.125	100.656	102.31	97.0302	98.9717	93.15	98.0343	99.3374	98.647	99.0063	99.5331	100.464		99.6836	0.332351
103.869	97.6971	96.7853	97.8444	99.0066	106.856	98.1464	102.755	97.3816	103.206	104.351	103.22	101.673	98.4142	100.559	101.508	96.6977	98.3818	99.4885	98.4621	98.2578	98.0889	101.261	101.613	96.9196	98.7907	99.1917	99.4557	99.4281	98.6566	100.348	102.791	100.372	101.57	100.919	97.5603	100.977	102.161	97.4134	98.8156	93.3025	98.5073	100.071	99.025	98.9305	99.3816	99.9766		99.7891	0.348427
104.249	97.9083	96.5869	97.807	99.0016	107.687	98.7129	102.49	96.6496	104.969	103.803	103.569	102.478	97.2663	100.552	102.339	97.4377	98.4396	98.9104	98.9462	98.7506	98.8031	101.795	101.259	96.534	99.0601	99.5852	99.4378	98.707	98.9364	100.524	102.026	99.7187	102.751	99.9325	96.5523	100.997	102.523	98.0306	99.5452	92.2626	98.0498	98.9192	99.1418	99.2612	99.7927	100.371		99.8525	0.383727
104.395	97.8937	96.9151	97.8225	99.0225	107.823	98.3331	102.558	97.4459	106.079	103.812	103.505	102.336	97.6173	100.39	101.964	96.6393	98.6272	98.6592	98.4747	98.4801	98.2796	100.428	100.283	95.9374	99.3854	99.649	100.027	98.944	100.171	98.7518	101.713	99.9061	101.667	100.467	95.8244	102.167	101.976	96.9318	98.9991	93.1204	96.5788	99.5105	98.7918	98.7471	98.855	99.8919		99.6978	0.391857
104.062	97.8744	97.4674	98.1854	98.5137	107.506	98.9043	102.697	97.5454	106.277	103.822	104.186	103.885	98.0807	96.8409	101.584	98.2525	98.0184	98.5404	98.9551	98.047	98.5472	97.7835	101.388	97.385	98.9238	98.1078	101.595	100.806	95.4259	101.259	104.253	100.601	102.889	99.1762	95.1891	103.625	102.508	96.5022	95.434	91.7865	101.014	98.4663	98.5607	99.7275	101.2	100.745		99.8328	0.448125
104.511	96.8906	98.1167	97.2135	97.8681	107.704	98.4224	102.262	97.3697	107.463	103.533	103.721	104.057	98.393	97.5179	102.127	98.533	98.1848	98.7547	99.9039	97.963	97.3876	97.1755	99.7816	97.2744	99.5015	97.2394	102.022	100.558	95.2287	102.25	104.084	101.48	102.589	99.3918	94.3953	104.824	101.591	96.4454	95.0415	92.5621	100.822	98.4274	98.6751	100.083	100.602	101.188		99.8113	0.468929
104.236	97.5329	96.822	96.7416	97.0762	108.431	97.4678	103.398	96.318	108.094	103.935	103.185	103.541	97.7825	97.1954	102.026	98.3087	98.6743	98.179	100.434	99.895	98.0069	97.0526	100.023	96.6173	99.2076	97.7749	102.432	100.307	95.3722	101.792	103.018	100.882	102.185	99.0262	94.5099	105.065	100.822	96.1275	93.9662	91.0042	100.019	98.9317	98.414	99.7972	101.018	101.119		99.6546	0.49884
104.421	96.9494	97.0116	97.1015	97.7103	109.438	97.1205	102.422	96.57	108.484	102.871	103.62	102.856	96.8373	97.5779	102.074	98.4558	97.2516	97.5896	103.068	97.5365	97.7467	97.2556	100.065	96.2395	99.3638	97.8927	102.508	100.811	95.6925	101.022	104.423	101.665	102.84	99.3245	95.1685	105.494	100.524	95.3625	93.7554	91.0769	99.8542	99.4606	97.9564	99.8516	101.213	102.139		99.6952	0.524817
105.478	96.0932	96.4735	97.4995	98.6528	109.932	97.6083	102.097	96.1289	108.515	102.539	103.061	102.994	97.8515	97.728	101.711	98.7653	97.0335	98.0177	103.524	98.6924	97.7222	96.6349	99.7889	96.4781	98.8452	97.5508	102.876	100.135	95.8315	101.835	104.047	101.384	102.869	98.9373	94.4655	105.186	100.282	94.5623	92.9318	90.6271	99.5752	99.8406	97.9544	100.494	101.328	101.999		99.6718	0.542946
108.664	95.4772	97.5057	94.8415	98.6061	111.315	99.7183	104.122	96.9257	112.979	102.989	106.183	102.872	97.8035	98.148	101.777	98.0578	97.2717	97.5086	103.613	99.4755	97.8566	96.403	99.617	96.9122	98.6354	98.6913	102.779	99.9905	95.8197	102.26	104.992	101.454	102.805	98.779	94.0857	105.151	99.7708	94.9123	92.4901	91.0726	99.3986	100.514	98.2246	100.134	101.131	102.253		100.042	0.631869
107.882	96.0278	98.1166	94.4855	98.3674	110.939	99.8099	103.566	95.8644	113.406	103.652	104.892	102.775	96.2815	97.4782	102.403	98.3852	97.4007	96.8998	103.922	99.725	97.6967	96.6322	99.1831	97.0462	97.9924	98.363	103.405	100.104	95.9519	101.614	104.487	101.197	102.833	98.9947	94.1298	106.168	99.7816	95.0695	92.2833	90.5563	98.7885	100.195	99.3003	100.669	102.041	101.654		99.9663	0.637574
107.73	95.8259	98.2187	94.3862	97.6359	110.625	99.167	103.063	96.1622	114.419	103.036	105.69	102.611	96.618	97.64	101.79	98.5361	97.0801	96.8716	104.341	98.6927	97.6352	96.6427	98.9302	96.0746	97.3536	98.2127	103.379	99.337	95.1686	101.299	105.186	101.539	102.55	99.173	93.951	106.688	98.4953	95.1684	92.6207	90.6096	98.2259	100.798	98.3392	100.712	101.861	102.579		99.844	0.65759
109.193	95.688	97.9974	93.7417	97.3949	111.31	99.0648	102.777	96.6578	113.986	104.123	105.289	103.046	97.4231	97.5666	102.31	98.1805	97.7237	96.5056	104.842	98.5022	97.5	97.2128	98.921	97.7358	97.4075	98.2772	103.615	99.5856	95.3018	101.539	105.402	102.565	102.847	99.2137	93.7019	107.708	98.7347	94.8548	91.6541	90.716	98.7437	99.9237	98.9642	101.183	102.014	102.375		100.022	0.680773
109.453	95.5663	98.4036	94.0615	98.026	112.326	98.5992	103.989	95.8035	115.044	103.875	105.035	102.405	96.0397	97.5743	102.595	98.5915	96.9595	95.9159	105.133	97.5482	97.4927	97.0186	100.166	97.7615	97.2934	98.6985	103.554	99.8563	95.7933	102.049	105.231	101.141	102.474	98.7602	92.8694	108.32	98.705	94.8553	92.4645	90.5725	97.9341	100.803	98.9186	101.268	102.214	102.637		100.038	0.709714
109.248	95.7939	98.0806	94.4279	97.9258	111.106	100.077	104.347	96.6905	116.251	104.512	107.063	103.988	97.8229	96.3518	102.295	96.9379	96.7176	96.3891	105.331	99.5396	97.3922	97.1291	100.399	97.3509	97.002	98.2846	103.878	98.7924	96.3411	102.983	105.122	102.808	102.448	98.5632	91.5043	110.024	100.11	94.9156	89.1318	92.0568	98.3784	98.994	100.338	101.506	102.038	102.213		100.225	0.748731
108.442	95.7926	97.8093	93.5094	96.6705	111.354	99.0429	104.838	96.3683	117.479	104.874	106.677	103.862	96.5143	95.9234	102.292	97.6438	96.7502	95.7699	105.551	98.3727	96.9524	96.3089	99.9822	97.0966	96.704	97.8808	103.493	98.6485	95.7746	100.874	104.381	103.313	102.549	98.3162	91.633	110.5	99.6055	94.6553	88.8395	91.7399	98.1685	98.4277	100.582	101.228	103.464	102.068		99.9728	0.781233
108.322	96.0721	97.6687	93.5166	97.6232	110.47	98.5781	104.346	96.216	118.257	105.682	107.297	103.149	96.3596	96.2325	102.369	97.4163	96.6969	96.4325	105.841	98.1824	97.2632	96.3433	99.8286	97.183	96.3057	98.3097	103.546	97.9698	96.8395	100.077	104.909	103.191	103.836	98.6169	91.4277	110.827	99.885	94.3274	88.4611	91.3351	97.4823	98.7058	100.416	101.495	102.069	102.567		99.9988	0.792555
109.021	95.9832	97.3753	93.2669	96.8586	110.751	98.7603	104.287	96.0963	118.325	105.602	106.755	103.355	96.3964	96.9151	103.216	97.2459	96.6357	96.6128	105.334	98.1231	96.8075	96.376	99.1945	96.7134	96.0224	98.1414	103.508	98.0188	96.4725	99.729	104.748	103.073	102.028	98.2457	91.0026	111.513	100.163	93.8909	88.6593	91.5808	97.2732	99.0503	100.457	101.339	102.004	103.393		99.9217	0.803881
109.453	97.1336	97.4092	94.1006	96.9851	111.923	98.7037	104.664	95.7129	119.411	106.79	106.752	102.941	96.1226	96.3013	102.832	97.1695	96.508	95.6815	106.095	99.5035	96.9394	96.9044	100.257	97.3498	95.4062	98.3933	103.211	97.3789	96.0856	99.6616	105.125	104.868	102.956	98.4514	90.5096	111.909	100.118	93.4648	88.0327	90.8948	97.7622	98.6303	100.395	102.004	102.719	102.251		100.082	0.848302
110.042	96.9148	97.9629	93.9508	97.1254	111.21	97.8997	104.375	95.2243	119.228	106.256	106.892	102.985	96.5781	96.3257	103.5	97.4532	96.0705	95.0509	106.951	98.3561	96.6024	95.7721	100.659	97.7939	95.6792	97.959	103.405	97.3792	96.5857	100.652	105.419	104.356	102.725	98.0711	89.4402	112.352	99.7768	93.348	87.6982	91.5005	96.8867	99.4111	100.684	101.626	102.937	101.747		100.017	0.860554
109.769	98.0589	96.9712	94.1832	96.5236	112.143	98.8556	104.601	95.17	120.385	108.107	106.955	102.913	96.4552	96.4639	103.124	96.9758	95.6807	95.6566	106.642	97.5304	96.0481	96.8429	100.677	97.3902	95.3094	98.1869	103.183	97.9221	95.9328	100.367	105.594	104.72	102.12	98.1786	89.4077	111.514	100.071	93.3836	87.0892	91.4543	97.5804	99.1469	100.805	101.601	102.871	101.841		100.051	0.88179
110.608	97.2671	97.3272	95.3176	97.1908	112.685	97.7846	104.182	95.1987	121.124	107.802	106.688	103.668	95.672	97.1041	102.998	97.7899	96.1941	96.2453	107.389	98.4608	96.4597	98.4252	100.709	98.1266	94.9243	97.8279	102.687	97.6223	95.6814	100.257	105.048	106.055	101.54	98.3983	89.9929	111.294	99.6249	93.8902	86.6747	90.0942	97.7409	99.661	100.875	101.641	102.973	101.887		100.187	0.893512
109.444	96.4293	98.0593	94.9218	96.0399	112.705	98.8281	104.426	95.0241	121.18	108.443	107.676	103.471	96.7056	96.6907	103.342	97.9527	95.6744	95.6243	107.381	98.214	95.9113	99.0322	100.257	98.4616	94.6894	98.0748	103.226	98.2028	95.8623	100.271	107.268	105.661	101.948	97.8507	88.8155	111.152	99.0421	92.9498	87.2059	90.7708	98.1111	98.3784	101.086	101.391	102.803	101.779		100.179	0.908114
109.549	97.1483	97.8207	94.2347	94.9152	112.517	99.6782	104.586	95.0229	121.007	107.598	107.449	102.731	96.1606	96.6004	104.185	97.3527	94.844	96.2968	107.791	97.4051	96.5263	97.7887	99.8133	98.6896	94.2875	98.0077	103.172	97.9952	96.8896	99.8859	106.603	107.154	102.1	97.5864	89.4664	110.465	99.4026	93.3075	86.957	90.7435	98.6994	98.5632	101.012	101.223	102.371	102.216		100.124	0.904656
109.814	98.1885	99.4314	94.608	93.7855	111.915	99.2054	104.919	94.5024	122.08	108.438	107.705	103.043	95.7602	96.7969	104.883	98.057	96.5614	96.2189	104.995	99.3636	98.0776	98.9662	99.8059	97.9119	94.6973	98.47	105.596	97.4987	95.9525	100.584	106.376	107.984	102.229	97.9359	89.8773	110.777	99.014	92.6629	86.0835	91.1648	97.6082	98.0625	100.543	102.999	103.139	104.457		100.399	0.925716
109.853	98.6415	99.2253	94.1772	94.0406	111.777	99.1554	105.278	94.9133	122.288	108.187	107.765	102.36	95.153	96.5742	104.469	97.5354	96.4878	96.0279	105.261	99.0653	97.8168	98.8483	100.185	98.5495	94.3254	98.8776	105.8	97.6923	96.7323	99.8879	106.711	107.943	102.138	97.5967	88.9936	110.804	99.9891	92.6956	86.1486	90.7849	98.579	98.2424	101.02	103.042	102.881	104.648		100.408	0.933501
109.843	98.4591	99.2211	94.566	94.2846	111.61	100.122	105.189	94.5667	122.214	108.637	107.707	102.885	95.0872	97.5754	105.172	97.9559	96.2976	96.589	105.349	98.517	98.1307	97.6852	98.7665	98.4731	94.2948	98.6799	105.633	97.1681	96.7291	100.34	106.503	108.258	101.899	97.5428	89.1912	110.437	99.0928	92.8639	86.848	90.331	97.0536	99.0914	100.273	102.71	102.709	104.631		100.366	0.929208
109.762	98.1732	99.7411	94.1287	93.8993	111.044	100.956	105.915	95.0828	122.953	109.283	108.229	102.435	96.5254	97.375	105.167	97.9173	96.0133	96.322	106.055	98.8	98.8095	100.134	99.9751	97.6424	93.4265	98.7655	105.051	97.2831	96.5571	99.7009	106.777	107.85	101.668	97.3728	88.7454	110.285	99.0997	93.0857	86.4158	90.5079	98.6724	100.567	101.438	102.819	102.751	105.096		100.559	0.941251
109.553	99.2846	100.473	95.0408	94.3195	110.864	101.174	105.364	94.8182	123.759	109.972	108.756	102.116	96.1503	97.3368	105.498	97.5991	95.8739	96.4818	106.04	98.0822	98.3059	99.3828	100.349	97.9462	93.7563	99.2336	105.636	97.6942	96.2875	101.001	107.533	108.84	102.177	97.505	89.4503	110.89	98.7191	92.9003	86.721	90.4754	97.981	99.7346	100.491	103.856	102.87	105.657		100.722	0.957514
111.638	99.6161	100.918	95.1683	94.1898	114.451	102.244	105.4	95.722	124.465	109.398	109.463	102.282	95.8851	97.6208	105.577	97.7838	95.4168	96.5063	106.684	99.5048	98.0179	99.6299	100.6	97.6539	93.2978	99.4205	106.058	97.1145	97.0574	100.305	107.468	108.695	101.63	97.1028	89.145	110.694	99.3901	92.7821	86.1588	90.1347	98.6257	100.52	100.651	104.864	102.589	105.399		100.956	1.00187
112.375	99.1435	101.54	94.8814	93.7052	114.431	102.051	104.401	95.2461	125.143	110.731	108.881	102.898	96.1664	97.3767	105.543	97.6922	95.758	96.3309	106.709	98.5631	98.4261	100.197	100.597	97.9784	93.0938	98.8098	105.681	97.7995	96.2963	99.3823	107.25	108.641	101.319	96.9405	88.9568	110.751	98.5349	92.961	85.8997	91.9204	98.4018	101.671	101.15	105.443	103.234	105.345		100.984	1.01505
112.929	99.2849	100.941	95.2351	94.4125	114.392	101.147	104.713	95.3167	125.679	111.642	109.476	104.182	96.444	97.6678	105.577	98.2768	95.4593	96.7469	107.374	98.6006	97.4754	99.5593	101.817	97.9156	92.7592	98.4313	105.982	98.2477	96.4394	100.649	108.182	109.246	101.405	97.5031	88.4372	111.021	98.4873	92.2861	85.3882	90.3061	98.4514	100.407	101.532	104.573	102.528	105.498		101.064	1.04934
114.481	98.5808	101.098	95.8419	94.2403	114.964	100.25	103.324	94.9904	125.378	111.145	109.566	103.88	95.5385	97.6392	105.383	98.1539	95.5021	97.3784	107.668	98.3205	97.7788	99.5857	101.58	98.4137	93.0978	98.7176	106.077	97.9037	96.8146	100.944	108.577	108.936	101.875	97.2564	89.0739	111.778	99.1566	92.7952	85.8789	90.7282	97.8951	100.387	101.513	105.3	102.43	106.102		101.147	1.04958
112.587	99.8292	100.909	94.6257	94.0255	113.936	100.34	104.099	94.6546	124.608	112.392	109.153	104.176	94.8701	97.7831	105.873	97.7908	96.47	97.1587	108.653	100.184	97.8317	99.1989	100.866	98.0209	92.9099	97.8947	105.757	97.9638	96.6689	101.185	107.402	109.732	101.693	97.5631	89.092	111.311	98.3503	93.4	85.9445	91.06	99.3814	100.494	101.313	105.918	102.822	106.598		101.159	1.03342
112.672	100.338	101.757	97.6491	93.4488	114.337	101.106	105.603	95.196	127.211	111.605	109.009	105.836	95.1799	98.0223	105.825	97.4662	95.5444	96.8855	108.903	98.9158	97.5227	96.9498	100.398	97.6623	93.0349	97.9714	105.442	97.5093	96.0436	100.724	108.726	109.57	101.67	97.5467	88.1376	110.697	98.0901	93.287	84.9858	90.5043	99.2055	101.226	101.563	106.24	102.735	106.412		101.199	1.08228
112.188	100.153	101.23	97.6851	92.4273	113.875	100.796	105.56	94.6115	126.821	112.246	109.364	104.93	95.3096	98.939	105.868	98.1484	95.7531	96.6826	108.791	98.1308	97.671	97.3543	101.347	98.9591	92.9097	98.5345	105.54	97.3282	97.2876	102.176	108.11	108.249	101.794	97.6939	88.0243	109.743	98.1685	93.573	85.7973	91.2267	98.222	101.272	102.203	104.861	102.368	107.179		101.215	1.05544
112.811	99.0165	101.61	98.8334	93.4272	114.468	100.381	105.917	94.1295	128.303	112.692	109.473	105.498	96.2383	98.9932	106.288	98.3929	95.7289	96.4858	109.357	98.5365	98.0769	97.5081	101.275	98.6631	92.6862	98.642	105.764	97.1641	96.6357	100.778	108.796	109.603	101.574	97.6245	88.5548	109.956	97.9145	93.6772	85.4473	91.4588	98.0128	102.57	101.97	106.008	102.757	106.358		101.405	1.08809
112.174	99.4248	102.136	99.0824	92.4706	113.843	101.1	105.268	94.2174	127.633	113.768	109.417	104.526	95.7371	99.6236	106.649	98.4046	95.356	96.3487	108.753	98.3617	97.9878	97.0608	101.157	98.9132	92.795	98.9352	105.745	96.5592	96.4697	99.6778	108.519	108.748	101.911	98.0973	88.0595	110.775	97.6661	93.1514	85.2666	91.1939	98.3945	102.012	101.968	106.599	103.457	107.086		101.33	1.09053
113.332	99.3075	104.109	98.6708	92.3857	114.786	101.612	105.286	93.9688	128.006	113.389	109.76	105.429	94.7083	99.8845	106.698	99.2453	95.4623	96.9801	109.714	97.9452	97.6353	96.7644	100.981	99.3946	93.0642	98.6057	104.767	97.5068	96.7266	102.429	108.718	108.33	102.267	97.1371	88.3924	110.995	98.1053	93.1108	84.6445	91.7842	98.3026	102.305	101.666	105.769	102.633	106.856		101.48	1.10708
113.31	100.827	104.763	99.4866	92.4512	114.8	101.28	105.849	93.1403	126.768	114.407	109.191	105.103	95.1586	99.9423	106.066	99.0683	95.8552	97.3335	110.268	99.6466	98.0994	97.8516	99.9233	99.2738	92.8275	99.6033	105.652	97.5365	95.9724	102.241	108.925	108.541	102.18	97.1818	88.3438	110.817	97.7664	93.0442	84.5514	91.647	98.9535	101.817	102.021	107.162	103.785	107.195		101.652	1.10198
114.85	101.383	104.559	100.302	92.2477	113.607	101.558	105.189	93.9001	127.511	114.177	108.989	104.691	95.4977	100.22	106.2	99.0555	95.704	97.0596	110.647	99.4234	97.739	97.2806	99.5825	98.7851	92.8186	98.604	105.8	97.3677	96.531	102.132	108.826	108.221	102.588	98.0782	88.9773	110.707	98.2749	94.0471	85.3098	91.8171	97.8025	102.314	102.729	108.78	103.186	106.164		101.728	1.09666
115.847	100.435	105.419	100.89	91.78	115.51	101.543	104.746	93.9745	127.192	114.02	108.686	104.892	94.9461	100.842	106.512	98.6085	95.8895	97.4354	111.586	99.0648	97.4262	96.9338	100.76	98.9645	92.8082	99.4132	106.385	96.9633	96.1703	102.288	109.429	108.536	102.571	97.8082	87.9663	111.464	98.1762	93.0015	84.4648	92.9072	97.2673	101.972	102.53	108.791	103.261	106.563		101.801	1.13481
114.546	99.4766	105.51	101.258	91.0504	112.938	101.752	105.706	93.57	127.339	114.245	108.253	104.886	94.9891	100.866	106.536	98.8891	96.1138	97.6871	110.698	99.4535	97.9717	97.0151	100.301	98.9401	92.8462	99.6785	106.313	97.0364	96.8762	102.101	110.08	107.058	102.549	97.409	87.6598	111.132	98.1365	93.5957	84.7312	93.3364	99.5479	102.949	102.963	108.111	103.748	108.278		101.832	1.10863
114.861	99.5773	106.114	101.518	90.3022	113.209	100.848	104.744	93.4538	126.195	114.049	107.99	104.531	95.3622	101.381	106.28	98.8762	96.1332	97.1957	112.052	99.5506	97.559	97.0881	102.028	99.3145	92.7116	99.6747	105.543	97.6071	96.2924	102.734	109.908	108.071	102.829	97.7429	87.5668	111.019	97.4987	93.7886	84.3398	93.3253	98.8586	103.516	103.448	109.042	103.863	106.956		101.841	1.11043
114.812	99.0877	106.456	101.795	92.9883	115.059	101.788	106.091	94.1821	126.947	114.411	108.541	105.442	94.6559	101.705	106.301	98.8891	95.9595	97.13	111.841	99.3594	98.2128	97.0487	100.359	99.0994	92.4262	99.9656	105.968	97.7082	96.4641	102.987	109.932	107.47	103.111	97.9515	87.6325	111.289	98.0047	93.3975	84.0858	94.0295	100.181	103.272	103.957	110.021	103.615	107.958		102.119	1.12567
115.201	99.4157	107.184	101.82	93.0694	116.397	101.589	107.021	94.2155	128.051	115.811	108.747	105.998	94.9925	101.441	106.766	98.6401	95.7861	98.142	112.198	99.5543	98.5743	96.8396	100.249	99.2513	92.7358	100.04	105.73	97.6379	96.4058	102.348	110.293	108.497	103.455	98.6352	88.5486	111.153	98.1155	93.3903	84.1139	94.2648	99.8899	103.774	103.62	109.38	103.139	108.205		102.347	1.14945
115.243	99.9	106.5	101.066	93.2342	115.828	100.953	106.912	94.0744	127.731	114.955	109.07	106.501	94.6225	101.556	106.907	98.88	96.2586	97.7349	112.22	100.399	98.4136	95.8936	100.295	99.2185	92.7747	99.9005	105.799	97.4776	95.9198	102.78	111.202	108.12	103.621	98.8263	88.1317	111.703	98.0522	93.9886	84.5332	94.5416	99.5196	103.552	104.434	109.08	103.474	109.244		102.363	1.14606
115.784	99.4584	107.036	101.839	93.4533	116.041	101.31	106.783	94.8331	128.304	115.647	110.229	105.949	95.0084	102.058	107.188	98.8344	95.4556	97.3471	112.075	99.3671	98.7472	96.2777	101.259	100.109	92.7609	99.3576	105.435	96.9281	96.046	103.398	111.014	108.899	103.302	99.1269	88.2589	111.396	98.1192	94.4283	84.6941	95.4753	100.337	103.301	103.664	109.762	103.184	108.186		102.499	1.15118
116.499	99.3009	106.793	101.284	93.4999	116.552	100.949	105.996	94.0288	127.31	115.858	110.092	105.213	94.1598	102.055	107.186	99.3533	96.9803	97.29	112.68	99.9938	98.4284	96.0476	100.908	100.31	92.6821	99.5813	105.99	97.4412	96.5251	103.05	111.557	108.336	103.742	99.4964	89.0121	112.296	98.3329	95.0635	84.2167	95.2984	100.922	103.171	104.58	109.714	103.884	109.172		102.613	1.15204
117.397	100.112	107.814	102.2	93.0728	116.382	101.362	106.62	94.8295	127.737	114.903	109.171	106.047	93.7775	101.585	107.183	99.2853	98.0375	98.086	112.452	99.3476	98.4766	96.0187	101.844	100.693	93.2005	99.7842	105.826	97.6641	95.846	102.192	111.152	108.168	103.054	99.4433	89.3046	112.008	97.8745	94.603	84.9124	95.8253	100.096	102.589	104.608	110.518	104.168	109.376		102.695	1.14503
118.257	99.3998	108.659	102.072	93.7849	114.671	102.187	106.865	94.1878	128.136	114.865	108.952	107.703	94.4902	102.211	106.868	99.602	97.8706	98.5663	113.54	101.054	98.5085	96.9448	103.317	100.693	93.1922	99.3848	106.372	96.9169	97.4475	104.412	111.268	108.28	103.02	99.9112	89.3874	111.472	98.179	94.7881	84.8763	97.0806	100.143	104.051	104.811	110.293	104.74	109.284		103.037	1.13815
117.795	99.0364	108.814	102.989	93.9956	114.737	101.205	106.089	94.3237	128.891	117.134	108.524	107.184	93.0462	102.243	107.133	99.7637	98.6992	97.9478	113.192	99.9191	98.641	97.945	101.277	101.206	93.5201	99.2611	106.267	97.7083	96.6232	104.447	111.402	108.375	103.28	99.7439	88.5541	112.2	98.044	94.0118	84.6509	96.0071	99.7004	104.068	105.052	111.123	104.72	109.879		102.987	1.1733
117.025	98.6455	108.298	102.421	94.2191	114.431	100.859	105.491	94.8101	129.949	115.355	108.961	108.597	93.6794	102.085	107.764	100.1	97.4279	98.1312	113.374	100.859	99.115	96.5492	100.841	100.672	93.3931	99.4771	106.447	98.2086	97.3248	102.522	111.742	109.035	103.407	99.2945	89.2117	112.467	97.8854	94.5355	84.6171	97.0583	100.151	104.446	105.013	110.933	104.405	109.771		103	1.16587
117.731	100.308	108.459	101.882	94.6055	114.338	102.116	106.741	94.2928	130.081	116.711	109.71	107.545	93.3885	103.447	108.467	100.031	97.4768	98.1015	114.293	101.563	99.163	96.8015	101.517	101.266	93.6316	99.3345	106.531	97.5094	97.5528	101.857	110.541	109.388	103.895	99.716	88.5965	112.411	97.9736	94.0052	83.9092	97.7487	100.459	104.039	105.592	110.604	105.076	110.31		103.207	1.18688
116.006	100.439	108.593	101.077	94.6886	114.412	103.071	106.338	94.8142	130.144	117.067	109.642	107.503	93.5795	102.861	108.488	99.6627	96.9058	98.9568	114.598	101.286	99.2781	95.8771	100.515	101.079	93.4591	98.9902	105.951	97.7532	96.6871	101.916	111.503	108.84	103.908	99.2023	89.0092	112.691	97.3069	93.9485	84.7398	96.9022	100.995	102.715	105.888	109.904	105.002	111.162		103.093	1.1834
116.593	99.6567	109.063	102.227	94.3626	114.911	103.034	105.69	94.7654	130.267	117.486	110.518	106.573	94.1832	103.195	108.781	100.451	97.728	98.4548	114.783	102.486	98.9865	96.928	101.668	101.709	93.2465	98.6998	106.56	97.1366	97.7729	101.111	112.918	109.453	103.26	100.121	88.8927	112.301	97.5983	94.2294	85.5642	97.8897	100.795	103.727	106.012	110.559	105.109	111.418		103.38	1.18672
[truncated: 3 more columns]

## Sheet: PEG 2
1	1	1	1	1	1	1	1	2	2	2	2	3	3	3	3	3	4	4	4	4	4	4	4	6	6	6	7	7	7	7	7	7	7	7	7	7	7	7	7	8	8	8	8	8	8	8	8	8	9
1	2	3	4	5	6	7	8	1	2	3	4	1	2	3	4	6	1	2	3	4	5	6	7	1	2	3	1	2	3	4	5	6	7	8	9	10	11	12	13	1	2	3	4	5	6	7	8	9	1
100	100	100	100	100	100	100	100	100	100	100	100	100	100	100	100	100	100	100	100	100	100	100	100	100	100	100	100	100	100	100	100	100	100	100	100	100	100	100	100	100	100	100	100	100	100	100	100	100	100
98.9423	101.112	99.991	100.03	100.855	100.365	100.256	99.8074	101.334	100.912	100.407	100.482	100.669	99.8964	100.46	99.7038	100.895	101.24	100.059	100.842	100.494	99.0364	100.547	99.9213	100.473	100.461	101.104	99.8947	100.263	100.623	99.9837	101.485	98.8647	99.853	99.9766	100.337	100.528	100.344	101.027	100.446	100.636	98.9162	100.82	100.64	103.617	100.153	98.2855	99.2282	99.8111	100.923
99.0471	100.905	100.381	99.9518	102.664	102.126	100.281	100.227	104.127	100.862	100.141	101.298	100.282	100.654	99.9195	100.793	101.479	102.544	99.7133	100.584	100.493	99.1322	99.354	100.756	101.417	100.58	100.444	100.265	100.433	102.867	99.745	101.91	98.9604	101.628	100.058	100.767	101.515	99.3166	100.941	100.941	101.255	98.7249	101.48	100.972	105.097	101.531	98.4774	98.7111	100.241	101.353
98.7049	102.739	98.712	99.9971	102.782	103.067	100.15	100.166	106.471	100.985	100.61	100.919	100.928	100.299	99.8514	100.97	102.115	102.541	100.026	101.191	101.927	99.2175	99.2614	100.268	100.886	100.212	100.311	100.423	99.8351	102.403	99.5359	100.989	97.9763	101.71	100.586	101.456	101.905	100.77	99.9864	100.724	99.7099	99.4764	102.164	101.045	106.876	100.981	97.2544	98.0101	99.9635	102.753
98.9657	102.421	101.13	100.649	103.079	104.159	100.038	100.119	108.33	100.811	100.616	100.897	100.878	100.556	100.683	100.654	102.745	102.832	100.208	101.056	100.908	99.3782	99.0288	99.3914	100.551	100.029	99.7026	100.735	98.6653	101.884	100.332	100.997	98.1777	101.347	99.9516	101.8	102.137	101.075	101.667	101.114	99.9165	100.44	102.007	101.378	104.894	101.403	99.4304	97.8463	100.77	103.515
98.9282	102.554	99.6237	100.934	102.274	104.497	99.7535	99.8877	110.736	101.783	101.447	99.9414	100.961	99.7488	100.265	101.226	102.844	103.362	101.015	101.686	101.618	99.1954	98.2882	100.968	100.012	100.717	99.5727	101.597	100.201	102.588	100.496	99.5321	97.5308	101.492	99.6355	101.964	101.744	100.306	101.712	101.218	100.3	99.3662	102.323	102.147	103.25	102.262	98.2845	99.9225	101.21	104.669
99.7082	104.055	101.348	100.545	103.613	104.701	99.4641	99.9309	114.447	102.178	101.247	99.5562	100.416	99.2058	99.4145	100.376	103.285	103.005	100.892	101.975	102.307	99.0529	98.8332	99.7924	100.602	100.45	100.389	100.957	99.9105	102.852	101.464	100.74	97.4571	101.122	100.678	101.523	102.237	100.119	102.673	102.076	99.4794	98.6124	102.403	101.63	103.563	102.486	98.6126	99.539	100.649	104.729
98.6816	102.789	100.895	100.245	101.464	105.627	99.4976	100.475	115.928	102.012	101.887	99.7084	99.9699	99.6279	99.9416	100.794	103.116	103.575	100.642	102.092	103.458	99.1973	98.7942	100.164	100.551	101.074	98.9684	100.15	99.4731	100.528	100.546	100.871	97.71	101.712	100.534	101.204	102.103	99.7189	101.855	102.528	99.0196	98.6919	100.672	100.578	106.146	101.836	98.7102	98.0079	100.635	104.461
97.2399	102.609	102.004	100.104	101.491	104.791	99.4008	100.558	119.07	102.396	102.405	99.465	99.638	98.9443	99.3608	100.975	103.058	103.91	100.51	102.012	103.396	98.8577	98.4723	100.238				101.243	100.56	101.114	98.9059	100.728	97.88	102.206	100.184	101.637	101.444	100.236	102.297	102.268	99.4268	100.356	99.5594	101.405	105.329	102.955	98.9212	98.1349	101.52	105.182
97.8405	102.692	102.066	100.511	102.301	105.599	99.3238	100.093	121.584	101.802	101.361	100.446	98.4088	98.0764	98.6901	100.234	103.692	103.572	99.9756	101.968	103.72	99.3138	97.9221	100.009	101.132	100.056	98.9888	99.0455	100.482	100.904	98.5199	101.104	97.3217	102.107	100.437	101.235	101.432	100.312	101.164	102.209	99.619	100.043	100.676	101.531	105.02	102.841	97.1371	98.4341	101.082	104.869
97.9474	102.464	102.906	100.77	101.704	105.535	99.2814	100.447	123.337	102.576	101.573	100.788	98.7349	99.147	99.675	99.907	103.112	104.251	100.287	102.172	104.167	99.5804	97.8055	100.023	100.821	100.943	99.1203	100.774	100.494	101.292	99.1456	99.4951	96.7385	102.746	100.227	101.352	100.996	101.413	102.61	102.651	100.25	100.75	102.268	101.621	105.608	102.797	97.6343	98.5409	101.848	104.845
97.1651	102.644	101.834	99.9562	101.784	105.835	99.7141	99.6278	125.526	102.332	101.947	101.006	98.251	99.5932	99.4695	100.814	102.96	104.678	100.006	102.79	104.871	99.8325	97.7908	99.0002	100.823	100.846	99.859	100.484	99.5966	101.106	99.5177	99.7036	96.8143	103.079	100.828	101.646	100.449	101.244	102.304	102.411	100.001	100.179	100.763	101.145	105.924	102.647	98.23	98.0495	100.744	105.04
97.1554	102.51	102.09	100.246	103.965	105.122	99.4445	100.551	127.409	102.542	100.674	101.012	99.3562	98.1655	100.085	100.465	103.779	104.636	100.529	103.759	105.218	99.7342	98.2495	99.4975	101.213	100.531	99.4539	101.906	99.9855	100.739	98.9188	99.2235	97.3564	102.216	101.034	101.606	100.707	99.9028	101.863	103.65	100.307	100.837	101.05	100.778	105.944	102.148	97.3462	98.3472	100.552	104.353
96.9918	102.075	102.256	99.92	102.888	105.686	99.2719	100.641	129.441	103.35	102.406	101.139	98.8138	99.0932	100.221	100.541	104.083	104.177	100.731	103.199	105.946	99.5837	98.1896	99.2107	101.542	100.126	99.6238	101.492	100.987	100.513	99.2333	98.7313	96.9149	101.434	100.606	101.633	101.284	99.8	102.356	103.712	99.654	100.939	101.331	100.572	104.313	102.606	98.0786	97.8226	101.113	103.157
97.1174	102.574	102.652	99.3854	101.686	104.801	99.5832	100.649	130.233	102.993	101.813	100.909	99.9135	98.8642	99.966	99.4205	103.948	104.201	100.885	103.862	105.88	99.2304	97.8566	99.5654	100.607	100.295	99.6966	101.617	100.525	100.76	98.4348	97.399	97.5939	102.246	101.177	101.572	101.563	100.731	102.818	102.961	100.323	100.254	99.4078	102.479	104.577	103.27	98.0135	98.4288	102.437	103.27
95.6639	102.091	101.934	98.9023	100.881	105.095	99.3751	100.601	132.032	102.903	100.827	100.769	99.8964	98.9734	100.154	100.179	102.993	104.373	100.845	102.555	105.849	99.7044	97.2636	99.0528	100.979	100.384	98.7221	98.764	100.181	100.519	97.295	98.6026	97.3003	101.664	100.851	100.889	100.6	101.215	100.805	102.418	100.633	99.9411	99.8454	101.684	105.352	102.629	98.2684	96.4416	101.704	103.449
97.3528	102.291	102.965	99.1574	100.837	105.355	99.8335	99.808	132.505	103.648	102.107	101.431	100.038	98.6492	100.022	99.6984	103.551	103.601	100.593	102.104	105.682	99.2182	97.3793	100.338	101.509	100.701	99.9592	100.051	99.5036	99.8277	98.3318	99.4587	97.8617	102.468	101.157	101.533	99.793	99.9905	102.387	102.174	100.701	100.728	99.3465	101.569	104.667	102.961	98.7407	97.0766	101.457	102.074
96.6245	101.213	102.936	98.5856	102.038	105.457	99.9985	99.4354	132.671	103.491	100.968	100.547	100.214	97.4116	99.938	99.9404	103.712	104.265	101.212	101.974	105.146	99.3102	97.3243	99.6955	102.051	100.581	99.7687	98.9403	100.159	100.253	98.0085	99.5368	97.6058	102.275	100.828	100.812	99.013	100.417	102.551	102.497	100.132	100.98	100.371	101.785	103.345	102.779	97.9275	94.8689	101.185	101.994
96.3742	100.873	101.604	99.5848	100.582	105.119	99.1834	99.7822	133.619	102.835	99.5151	99.6823	100.862	98.7451	100.165	99.1237	103.811	104.236	100.493	100.416	105.749	100.565	97.791	99.8925	102.203	99.7139	99.2591	100.506	99.8745	100.861	97.435	96.5994	98.01	102.23	100.294	101.043	99.48	99.8988	101.825	103.472	99.8932	100.889	100.32	101.668	103.965	103.443	99.0175	95.8225	101.427	101.454
96.0321	101.436	101.472	98.9559	102.077	105.59	99.717	99.7997	134.258	102.83	99.7812	100.463	101.421	98.0612	100.169	99.7716	104.388	105.469	100.895	100.342	106.25	99.0148	97.5226	98.6074	101.749	100.038	100.115	99.0713	98.8965	100.627	96.9142	98.0304	97.4892	101.451	99.7024	101.969	98.5216	98.5149	101.76	102.664	99.799	99.8693	100.203	101.38	104.131	102.893	98.2672	96.4801	101.872	101.659
95.8706	101.175	103.119	99.7983	101.009	104.592	98.9992	99.4517	135.186	102.193	100.788	98.8122	101.622	98.3295	100.107	99.7045	104.214	104.938	101.294	100.127	106.45	99.6037	97.2771	98.6941	101.081	100.072	100.014	99.6245	99.8995	99.6725	96.2844	98.7069	98.2879	101.659	100.812	102.056	97.9717	100.091	101.301	101.938	99.1932	99.739	100.62	101.489	102.411	103.49	98.2808	94.6669	101.832	101.238
95.7546	100.515	100.394	99.45	101.47	105.016	98.6758	98.9046	135.093	102.349	100.248	99.7262	101.854	99.0302	99.7644	99.6606	104.646	104.308	101.835	101.275	105.742	100.541	97.7566	98.9032	101.151	99.5358	100.033	99.3834	98.3541	100.377	97.3692	97.6557	97.9058	101.373	100.146	101.329	96.8042	99.6805	102.221	103.231	98.7503	99.9383	100.238	102.443	103.101	103.439	98.1725	96.1105	102.092	101.891
95.1091	102.252	100.933	100.289	101.43	105.304	99.1356	98.7934	136.204	102.559	100.731	99.5736	101.784	98.0264	100.046	99.5882	103.915	104.587	101.432	100.611	106.044	99.3784	97.3671	98.3261	101.105	100.087	100.437	99.6648	99.5439	100.208	96.5436	97.3313	97.6626	101.48	100.688	101.644	97.7209	100.471	102.897	104.572	97.5386	100.826	100.108	101.484	105.144	103.2	98.0259	95.3254	100.781	101.53
94.9721	101.331	102.644	100.023	100.712	105.682	99.3503	98.8911	136.633	102.881	100.12	100.68	102.151	97.6628	100.623	100.126	104.401	104.435	101.948	100.165	106.009	99.5661	97.0096	98.5954	100.679	99.3826	100.597	99.0563	99.0182	99.6386	98.048	99.4333	97.6729	100.621	99.9996	101.385	98.6968	99.2975	102.765	103.36	98.7447	98.5793	99.892	100.748	103.758	103.717	97.9126	94.8466	101.335	100.844
95.0337	101.618	104.994	100.133	100.183	105.149	99.5374	98.7866	135.582	103.489	100.318	100.584	102.476	98.1577	100.579	100.375	103.566	104.478	101.73	100.557	105.334	99.5675	97.1551	99.353	100.203	100.163	101.041	99.4405	99.7061	100.228	97.5046	99.6789	98.2003	101.228	99.8024	101.368	98.9059	97.3866	104.344	103.08	99.3664	99.063	99.9839	101.347	104.42	103.455	97.2732	95.464	101.512	100.811
94.4025	101.755	106.012	100.318	100.041	104.685	99.5389	99.1094	136.812	104.843	98.9173	102.66	101.571	98.4874	100.579	99.2085	102.762	104.97	102.151	100.748	104.973	100.384	96.1628	99.1239	100.068	100.231	100.228	101.259	99.8196	101.015	96.3449	99.2016	98.5381	100.792	100.231	100.65	99.5721	96.7397	101.671	102.324	98.5352	99.3156	99.618	101.167	103.37	103.43	97.5806	95.0723	102.182	102.188
94.6763	101.687	105.716	100.869	100.973	104.668	99.3439	99.4332	135.364	103.916	100.117	100.883	102.41	98.6582	102.077	99.91	104.248	104.684	101.696	100.624	105.603	100.397	96.6134	99.171	99.6566	100.229	101.124	101.709	99.7212	99.8009	96.052	97.687	97.9463	100.994	100.036	101.946	100.192	97.9289	102.989	102.787	98.3998	100.785	100.276	101.998	103.217	104.275	97.3563	95.9432	101.87	100.837
95.2305	101.487	104.65	100.871	100.96	103.487	99.7332	99.2342	136.417	103.759	99.4152	100.581	102.001	98.0691	100.755	100.73	104.421	104.41	101.704	101.117	105.393	99.1346	96.6591	99.4017	100.07	100.174	101.728	101.317	99.3882	100.799	96.6678	98.4701	98.0582	100.778	100.567	100.738	100.142	99.4134	104.663	104.333	99.2057	99.134	99.1427	102.13	104.06	103.14	98.0071	95.243	100.171	101.374
96.6565	101.716	106.192	99.9887	101.316	104.361	99.2411	99.8646	135.336	104.449	99.6634	101.222	101.83	98.4424	100.851	100.652	101.908	104.846	102.51	101.936	105.279	99.7849	96.3082	98.6296	100.426	100.307	101.259	102.947	100.252	100.761	96.8823	97.6762	98.2757	100.186	99.2859	100.781	100.293	100.287	103.92	103.526	99.487	99.4432	99.191	101.373	104.067	104.11	97.4697	93.5082	102.239	101.475
96.4304	99.3364	104.376	99.7823	101.235	104.729	99.2246	99.8837	134.997	103.786	99.4265	101.339	102.081	98.6577	101.589	100.131	102.214	104.938	102.928	101.273	104.661	99.5443	96.7399	99.1935	100.724	100.248	101.367	100.449	99.2277	98.9235	96.3357	97.2151	98.3965	100.674	99.7508	101.242	100.511	100.799	104.12	101.975	98.3006	99.848	98.6261	101.758	104.372	103.194	98.2764	92.5674	103.139	100.9
97.2822	99.1884	106.738	99.3253	100.54	104.983	99.5372	99.419	134.99	103.992	99.1599	100.826	102.115	98.2637	101.113	100.555	102.726	105.005	102.825	100.905	105.814	99.1364	96.701	98.5142	101.324	100.568	101.619	101.199	99.7157	98.6792	95.9859	98.1394	98.2782	100.531	98.9983	101.185	100.009	100.871	104.207	102.926	98.9688	99.5215	98.3778	101.076	104.429	103.95	97.1375	92.2629	102.009	101.135
97.0542	100.201	104.787	99.0351	99.4478	104.448	99.7658	99.2333	134.522	104.257	99.3603	102.223	102.61	98.361	100.89	100.305	103.499	104.885	102.694	101.175	106.301	100.752	96.9812	98.4289	101.763	100.297	101.779	100.638	99.052	99.0065	96.4346	98.7366	99.1152	100.037	98.8508	102.294	99.84	99.3657	105.648	103.263	99.2597	99.5185	99.6611	102.076	104.978	103.763	98.0352	92.2462	102.134	101.317
96.7888	99.9279	104.591	98.7595	100.75	105.309	99.3665	98.6346	135.612	104.467	99.8222	102.821	102.507	98.5675	101.048	100.573	103.065	105.266	103.248	101.932	105.538	100.41	96.4637	98.4174	100.998	99.3313	101.711	103.082	100.023	98.8456	96.8495	97.8072	97.6023	100.888	98.7311	101.373	98.9654	99.5679	104.224	101.447	98.3081	99.8165	99.7372	100.918	104.323	103.713	97.4533	93.444	101.543	101.667
96.9375	100.081	106.554	99.2985	101.259	104.197	99.0686	98.869	135.528	104.655	99.8479	101.667	102.357	98.2867	100.578	100.563	104.198	105.068	102.928	101.178	105.82	100.115	96.7461	98.4628	101.755	99.5437	102.17	100.622	99.4787	99.1729	97.9987	99.7151	98.6443	99.5552	99.4721	101.937	99.3175	98.9452	104.02	101.539	97.5852	98.6459	97.3017	100.605	105.111	103.212	97.5505	92.9995	101.869	101.518
97.0787	100.862	106.404	99.2422	101.762	104.777	99.3478	98.9683	135.072	104.62	99.4458	102.853	102.741	98.5244	100.698	100.99	103.635	105.066	103.712	101.342	105.896	100.063	96.5564	98.2276	101.998	99.0424	102.339	102.583	99.145	98.1595	96.981	100.667	98.5808	100.134	99.5495	101.549	98.8941	99.1306	103.903	100.939	98.5169	100.315	98.3575	100.457	105.138	103.559	96.7999	93.4599	102.386	100.28
97.4738	101.112	106.361	99.3169	100.551	104.349	99.6571	99.353	135.45	103.651	99.3175	104.582	103.128	99.6844	100.844	100.411	103.304	104.441	103.182	101.693	106.36	100.783	97.0427	97.555	100.893	99.4635	102.165	102.444	98.4373	98.726	97.9126	100.911	97.7467	100.043	99.3748	102.228	99.0737	99.3874	104.13	101.013	98.9822	99.6951	98.4583	100.89	106.214	103.247	96.824	94.3217	101.28	100.468
98.1192	101.143	105.55	98.0954	99.8322	105.265	100.071	99.1156	135.212	104.595	99.4907	102.832	103.206	98.8259	100.332	101.226	103.997	104.344	103.696	102.754	106.441	100.624	96.7375	97.3836	100.746	100.4	101.556	103.229	99.1187	98.0166	97.7588	99.7742	97.4828	99.6312	98.795	101.612	99.6179	98.5006	104.626	102.031	98.4948	99.0822	98.5502	101.639	105.532	102.713	96.9035	94.4809	101.085	100.056
97.0096	100.147	103.428	98.3621	100.615	105.525	100.027	99.0126	136.771	104.657	100.266	102.986	102.51	98.9839	100.969	101.086	103.291	104.004	103.944	101.305	106.18	100.333	97.4335	97.472	100.256	99.542	102.259	103.625	98.5218	98.0789	96.4599	100.101	97.1772	99.035	99.4392	101.388	100.002	99.4681	102.586	102.051	97.4769	99.2901	99.0558	100.844	106.525	102.937	97.6533	93.9022	100.386	99.7408
97.3909	101.393	105.562	98.7897	100.682	105.331	99.3942	99.2898	137.31	104.568	99.6164	104.037	103.124	99.0956	100.708	101.829	104.236	104.586	104.215	101.153	107.225	100.527	96.5901	97.9899	100.233	99.6866	102.215	103.657	98.4367	98.161	97.6262	99.367	96.5937	99.3993	99.8759	101.57	99.6056	99.7305	103.444	101.997	98.1616	99.1601	97.3926	101.255	106.7	102.463	96.6271	93.52	100.45	99.3503
97.6143	100.608	106.609	98.4894	100.491	106.223	99.4468	99.9799	136.592	104.805	99.9512	103.256	102.471	99.4383	100.377	102.325	103.653	104.318	104.271	102.415	106.899	100.7	97.2992	97.4415	100.759	99.0615	101.639	102.862	98.1005	96.4298	97.9608	99.7021	97.3199	100.534	99.3047	102.051	99.6884	100.485	102.882	101.907	98.5802	100.034	97.7888	100.635	107.812	102.55	97.3092	94.3771	101.59	99.7555
99.1564	101.188	104.439	98.0911	100.703	106.274	99.0475	99.2094	136.753	104.864	99.8119	104.195	103.201	99.1619	100.509	102.616	104.24	104.365	103.71	102.365	107.354	99.9059	97.4937	97.7222	100.241	99.4163	102.135	103.984	97.8324	97.8919	98.1571	99.7041	97.6806	99.0996	99.3208	102.237	100.33	99.9914	102.714	101.431	98.453	98.939	97.3964	100.64	107.036	102.44	97.6197	93.7026	100.465	100.569
98.2408	100.562	105.641	97.1387	100.484	106.986	99.4413	99.5501	137.225	105.024	100.574	104.995	103.221	97.8345	99.7857	101.601	103.42	104.442	103.852	101.867	107.006	100.128	96.7788	97.6705	100.369	99.168	102.638	104.727	97.7258	96.8982	98.39	100.117	97.2857	99.6459	98.6068	101.689	99.8215	100.89	103.645	101.648	98.2809	100.397	97.7936	102.097	107.411	103.663	98.1845	94.4122	100.282	100.992
98.8006	100.686	103.605	96.9637	101.455	105.882	99.6896	99.4369	138.336	105.059	100.205	104.924	103.61	99.0634	99.8001	101.814	103.329	104.35	103.714	101.393	106.764	100.679	96.8888	98.3662	99.4798	98.7332	102.419	103.554	96.6439	97.526	98.2807	99.8914	96.8736	99.7763	98.9109	102.58	100.356	100.466	103.932	101.685	98.6855	99.6189	97.37	101.929	105.696	102.981	96.206	95.1369	101.876	100.631
98.4211	99.4914	103.522	97.2939	100.765	105.156	99.7722	99.2318	136.426	104.257	99.4834	105.305	103.263	98.1385	99.9609	101.695	102.681	104.966	104.337	100.629	107.138	101.42	97.5783	98.35	99.9112	99.4468	102.741	103.334	97.3987	98.0627	97.8214	100.005	96.6759	99.6742	98.855	102.009	100.228	99.4793	102.879	101.55	97.5201	98.6488	97.9205	101.438	105.83	102.632	98.5365	94.6628	101.856	100.368
99.2034	99.5725	103.521	97.3004	101.179	104.977	99.5761	99.4894	135.677	104.365	100.354	104.727	102.263	98.2657	100.237	102.219	102.702	103.859	103.532	101.324	106.957	101.354	97.3925	96.5823	99.5662	98.8947	101.777	103.658	96.8452	98.3623	97.7233	100.306	97.5613	98.5415	99.0926	101.878	99.9711	100.111	103.217	101.359	98.9031	99.0497	98.5479	101.095	106.023	103.144	96.6666	96.665	100.658	100.679
98.0088	100.632	103.644	97.0233	101.137	105.101	99.7956	100.23	136.352	105.169	100.56	104.522	102.513	98.5222	101.084	102.146	103.072	104.194	103.593	100.669	107.188	101.637	96.8488	97.1578	99.8297	98.5462	101.598	102.812	97.2306	100.131	97.8271	99.5187	97.787	99.4052	98.6696	101.767	99.7458	101.099	103.937	101.841	100.101	98.8363	99.3713	100.454	105.697	103.318	97.2998	97.2118	101.2	101.063
98.7038	99.2909	102.444	98.4358	101.394	105.458	99.847	99.2418	136.419	104.668	100.605	105.119	101.535	98.5933	100.158	102.341	103.322	103.957	103.639	100.289	107.722	101.254	96.9311	96.3665	99.195	98.4853	102.056	103.696	96.96	99.0125	98.0778	99.747	97.4171	99.4775	99.1646	102.11	99.938	100.588	103.833	101.79	100.029	99.468	99.0501	101.549	105.274	102.557	96.912	97.799	101.641	101.712
98.0682	100.595	102.845	97.7406	102.334	106.063	100.11	98.424	135.418	104.953	99.7619	104.848	101.125	98.6628	100.25	102.15	102.781	103.659	104.092	100.971	106.544	101.237	96.563	95.7363	98.8662	98.9629	102.215	105.065	97.4486	98.6134	97.5952	100.956	97.2214	99.4575	99.0337	101.681	100.997	100.918	104.091	102.582	98.6896	100.056	98.3651	101.435	106.299	103.088	96.669	96.7263	101.666	101.078
98.4483	100.334	103.062	97.8392	101.557	106.112	100.431	98.7686	135.821	105.051	100.51	103.072	100.875	98.5584	100.081	102.688	103.151	103.318	104.609	100.586	107.669	101.553	96.0295	96.5949	99.0663	97.6467	102.196	105.576	95.9158	98.7506	98.1533	99.8825	96.3774	99.6741	98.2605	101.702	100.641	100.25	103.107	102.191	99.6106	100.679	99.7846	101.019	104.234	102.71	97.2261	98.0578	101.743	100.762
97.576	99.4263	102.535	98.2531	101.539	105.8	100.646	97.9223	135.527	105.609	100.561	102.924	99.7759	97.5466	99.7801	103.187	103.341	103.325	104.781	99.4663	106.986	100.847	95.3449	96.4667	98.7848	97.4863	101.43	104.917	96.3311	99.5826	98.9148	101	96.9899	99.8633	99.2382	102.056	101.157	101.064	104.528	103.213	98.8252	100.445	99.5174	100.249	104.58	102.573	96.0587	98.2712	101.905	100.592
97.1319	100.342	101.791	98.4586	102.613	105.932	100.346	99.0312	135.873	104.611	99.3674	102.876	99.7763	98.5723	99.8298	101.914	102.582	103.143	103.801	100.294	106.653	101.873	95.0335	96.7074	98.8224	97.7819	101.55	103.205	96.9021	100.716	98.614	100.449	96.6532	100.43	98.2274	101.586	101.355	100.855	104.365	103.141	99.616	101.708	98.6613	101.389	103.507	102.772	96.9294	97.8596	103.281	101.848
96.0647	99.4054	101.356	98.1969	102.734	105.637	100.039	99.0189	135.615	104.886	100.489	103.041	98.6202	98.5916	99.5769	101.91	103.096	103.071	103.063	100.28	106.87	100.679	95.5047	95.3281	99.1729	97.586	101.4	101.662	96.8092	100.91	98.5986	98.5736	97.431	100.45	99.3493	102.2	101.989	100.788	103.051	103.112	100.484	100.383	100.341	101.382	104.05	102.683	97.0195	95.6771	103.072	102.268
96.5711	99.7314	99.2186	97.9605	101.821	105.576	100.314	98.8086	136.375	105.085	100.153	103.831	98.7919	98.2826	99.3371	102.219	103.362	102.431	103.331	100.252	106.321	101.17	95.6493	96.3035	99.4607	98.0875	100.462	103.093	96.7623	100.185	98.8515	99.5516	97.4629	100.464	99.3663	102.656	101.621	100.436	102.614	102.946	99.6738	101.482	100.26	101.715	104.263	102.201	96.9625	98.5315	103.555	101.892
96.105	99.1414	100.012	98.3268	101.993	106.275	100.062	98.4765	135.946	104.731	100.146	103.838	98.3551	98.1483	99.4807	103.612	103.322	101.997	102.627	101.385	106.734	100.555	96.0791	96.234	99.3285	98.5382	100.517	100.96	97.5666	99.3213	98.49	99.3385	97.6042	100.933	99.8507	102.626	101.621	101.326	103.441	101.736	100.038	100.559	101.228	100.818	104.711	103.916	97.8387	97.9206	103.279	101.508
96.4144	99.3179	100.706	97.6021	102.149	105.928	99.7843	98.4817	135.438	104.232	99.491	102.828	97.5784	97.8702	100.023	102.985	102.76	102.045	104.197	100.634	106.445	101.001	96.2408	96.7648	99.5481	97.2092	100.338	99.9245	97.9157	100.375	98.6273	98.9147	97.6511	100.883	100.707	102.124	101.706	101.454	102.837	102.289	100.101	100.409	102.962	100.96	104.635	102.953	97.0651	97.4833	104.517	101.436
96.9592	98.3832	98.8427	97.8042	101.858	105.361	99.5517	97.8135	135.804	104.898	101.17	103.294	96.9142	98.4383	99.6759	102.566	102.794	101.522	103.272	100.927	106.544	101.244	96.1207	97.1295	99.8062	98.3992	100.327	100.626	96.3112	100.575	98.1482	99.4426	98.207	100.934	100.579	102.18	101.92	101.775	103.841	102.313	100.181	100.351	103.222	101.204	103.781	102.448	96.2795	98.8669	103.141	102.337
97.4444	97.1687	97.7137	97.3713	101.976	105.667	100.294	97.3781	135.034	105.234	100.236	100.97	97.1578	98.6334	99.1505	102.261	103.2	101.104	103.533	101.252	106.076	100.292	96.9512	97.5252	99.6857	97.6052	100.985	102.59	96.7273	98.8443	98.0777	97.7417	98.5791	100.631	102.16	101.952	101.177	101.558	103.027	101.934	100.097	98.9967	101.969	100.476	102.835	102.866	96.4961	99.0441	102.142	102.269
96.8226	96.9394	98.4534	97.6235	101.972	105.947	99.8197	97.1083	135.591	105.904	99.8445	100.772	95.3737	97.4022	99.4899	103.546	102.58	101.199	103.434	101.067	106.533	100.92	96.7274	98.6486	99.0647	96.7364	100.792	102.355	96.1401	102.36	98.3006	98.972	97.9607	100.878	101.905	102.135	101.495	101.832	104.378	102.334	100.43	99.9901	102.445	101.261	103.499	102.646	95.4152	98.4025	103.408	101.147
96.2109	97.2243	98.0709	97.6507	101.988	105.656	100.103	97.0307	134.543	105.16	100.195	100.556	96.097	98.334	99.7321	102.975	102.795	101.178	103.072	100.469	105.915	99.4708	96.5378	97.8306	98.6265	96.9361	100.709	102.473	95.6611	100.142	98.6107	99.0828	97.3902	100.51	102.304	102.12	101.625	101.67	105.232	101.924	100.751	99.162	102.603	100.255	104.775	102.214	95.3978	99.1574	103.378	102.566
97.821	96.5791	97.9337	97.9207	102.552	105.519	99.8807	96.9377	135.48	104.983	99.5162	100.711	95.1644	98.0759	98.3133	103.148	102.751	100.855	103.11	101.031	106.14	99.9718	96.3242	96.8598	98.5907	96.399	100.64	100.832	97.0932	100.728	97.4238	98.5208	97.1968	100.744	103.167	101.122	102.045	100.106	103.766	101.945	100.559	98.7169	102.962	99.8217	103.767	102.268	94.8712	98.1712	105.469	102.533
								135.077	105.083	99.2614	100.874													99.3706	95.8372	100.638	101.504	97.1963	100.91	97.5876	98.8014	96.9823	100.373	103.132	101.902	101.746	100.922	104.453	101.792	100.557	97.9166	103.727	100.354	103.48	102.736	96.5588	98.1115	106.095	103.089
[truncated: 6 more columns]

## Sheet: PEG3
1	1	1	1	1	3	3	3	3	3	3	4	4	4	4	4	4	4	4	4	5	5	5	5	5	5	5	6	6	6	6	6	6	6	7	7	7	7	7	7	7	7	7	7	7	7	8	8	8	8
1	2	3	4	5	1	2	3	4	5	6	1	2	3	4	5	6	7	8	9	1	2	4	5	6	7	8	1	2	3	5	6	7	8	1	2	3	5	6	7	8	9	10	11	12	14	1	2	3	4
100	100	100	100	100	100	100	100	100	100	100	100	100	100	100	100	100	100	100	100	100	100	100	100	100	100	100	100	100	100	100	100	100	100	100	100	100	100	100	100	100	100	100	100	100	100	100	100	100	100
100.687	98.4447	99.3815	99.8591	99.5873	100.075	99.0882	99.2077	98.8698	100.65	99.3656	100.96	100.097	98.9962	99.5258	100.656	99.6493	99.0022	101.032	99.7981	98.6345	99.0062	100.036	100.108	100.56	101.532	98.3981	96.813	101.128	100.503	99.9867	99.9162	101.734	99.9695	100.069	100.246	99.7575	100.706	98.2535	102.11	99.2734	100.186	99.874	99.9405	99.7672	98.995	100.173	100.052	100.706	100.055
101.355	96.4312	101.441	100.534	99.5259	100.002	99.7655	99.7062	98.2756	99.6881	99.5839	102.65	101.463	98.7054	99.4539	100.293	99.3335	99.1735	100.47	99.7722	101.005	99.8009	97.7913	99.3397	99.0752	99.4091	98.7114	96.7424	99.7224	100.74	101.542	100.235	102.727	99.7079	100.175	100.83	100.422	101.672	98.5078	104.265	99.21	100.215	99.3014	100.375	98.1789	100.025	100.868	100.616	99.4597	100.066
100.939	95.9847	102.63	99.9385	100.341	99.6882	99.6944	98.9905	98.9001	99.2616	100.41	104.05	100.59	97.0242	98.8354	100.567	99.2076	100.248	101.153	100.026	100.042	99.9584	97.5305	98.0552	99.3068	99.9987	98.5157	95.6385	100.423	101.321	102.805	100.236	100.433	99.3186	99.5401	99.9917	99.9483	101.664	99.2859	105.362	99.6024	100.028	99.5312	100.889	95.3044	99.2033	100.373	98.9599	98.3714	99.4748
100.265	95.8184	102.498	99.7787	100.054	99.0514	99.7448	99.7372	98.4379	100.289	100.001	105.148	99.5539	98.413	99.4288	100.266	99.3382	101.147	102.54	99.2248	99.5388	100.261	97.8167	98.4121	99.2662	99.8526	98.2572	95.1238	99.9292	100.403	102.786	98.1779	100.041	100.971	99.4419	98.8842	99.9663	101.605	98.8476	107.369	99.0389	100.481	99.6648	100.757	94.6559	99.5637	100.151	99.8502	99.3734	99.8953
99.6687	96.8489	104.508	99.4303	100.13	98.809	99.6295	99.2869	99.0379	100.073	99.5475	106.629	99.6626	96.3709	99.3224	100.783	99.2658	100.674	101.992	99.6198	100.327	99.8274	97.5607	98.2257	100.153	99.586	97.9943	93.5768	100.117	98.2959	102.491	99.3976	100.225	99.5096	99.8337	99.7996	100.42	103.241	98.3743	109.556	99.0926	100.185	99.5708	100.847	93.907	98.9953	100.092	99.3651	99.2717	100.043
100.348	96.4595	104.536	99.1483	100.373	99.5535	99.8489	99.4179	98.9934	99.3181	99.0173	107.629	98.5249	97.0361	99.7579	101.477	99.5844	100.257	102.372	100.552	101.137	99.7145	98.714	98.7937	100.654	100.112	98.5303	92.9686	99.0714	97.1298	103.83	99.2976	100.56	99.2202	98.6334	99.9165	99.9965	103.757	98.708	110.936	97.8097	100.64	99.0653	100.023	95.0702	99.3836	100.274	99.6009	100.176	99.9509
100.41	96.1413	106.267	99.1098	99.7974	99.9796	99.7065	99.6533	98.8806	99.9869	98.9497	109.428	98.7766	96.9359	99.8871	101.004	99.4775	99.9632	102.508	99.3969	99.4648	100.282	98.5207	98.4391	101.853	100.299	98.1194	94.0332	99.4893	96.707	103.11	99.3974	100.99	99.0636	97.9589	99.9116	100.471	102.434	97.7703	112.003	97.8514	98.4733	98.6171	99.4242	94.4241	99.4012	100.451	98.813	97.5705	99.5157
99.3811	95.5222	103.912	98.9002	99.7262	99.8482	99.7714	99.8601	98.3783	99.9883	98.8227	109.464	100.571	96.1902	100.652	99.8406	99.297	100.314	101.966	99.9856	99.1964	100.138	97.4215	99.3594	101.495	99.743	98.587	92.9219	98.6182	95.9581	104.292	99.5364	101.324	99.7495	98.0249	99.6082	99.9202	103.012	97.9267	113.618	97.7266	98.6038	98.4002	99.4166	94.1968	98.7887	99.4594	100.002	98.5932	98.892
99.3719	96.1181	104.644	98.9684	99.9413	99.9403	99.9138	100.058	97.78	100.497	98.4338	110.083	98.9413	97.5061	100.354	100.61	99.7651	100.812	103.455	99.7313	100.639	100.635	98.5047	98.0026	101.298	99.1264	98.365	93.618	98.8135	96.5472	103.882	98.1308	101.188	100.355	98.0443	100.16	100.084	101.506	98.2593	113.761	97.4996	99.0181	97.7357	98.8055	94.316	98.4607	100.307	101.138	99.7053	99.4229
99.3701	95.6865	104.457	98.3894	99.8049	99.4073	99.5422	99.4454	97.9857	100.066	98.8417	110.501	99.1463	97.1862	99.6106	101.008	100.401	100.795	101.686	99.7888	100.341	99.2397	98.3896	97.8636	101.976	100.431	98.2649	92.4817	99.4353	96.3125	103.794	97.4909	100.334	98.5479	98.2955	99.8978	99.0913	101.557	97.7175	116.346	97.3115	99.0851	98.1326	99.1658	93.88	98.4128	100.811	101.157	99.0348	98.6209
100.165	97.1496	105.093	97.984	99.4097	99.6373	100.062	99.3834	97.1443	99.7855	98.5548	110.281	98.4192	97.7505	98.7912	100.625	99.4855	101.196	102.44	99.0347	99.781	100.309	97.4496	96.4217	101.579	100.55	97.9686	92.5665	98.8647	97.0675	105.454	97.9559	99.6798	99.5718	97.5145	99.5339	99.159	101.209	97.6867	117.586	97.7177	98.6983	97.1537	99.2072	94.5397	98.3672	101.354	99.4994	99.0659	98.9101
99.4785	97.7985	105.015	98.5551	99.2659	100.291	99.9742	99.0411	96.7954	99.674	98.1006	109.915	98.6507	98.1757	99.8135	101.012	99.8775	100.411	103.184	99.7697	100.589	98.9262	99.9075	97.2687	101.883	98.8976	97.4058	95.0862	98.3763	96.2661	105.112	97.4996	99.1267	98.6242	97.4826	99.266	98.4867	101.481	97.8382	119.792	97.3573	100.513	96.4128	98.92	95.5801	97.9054	100.491	100.587	99.1742	98.5745
99.5484	97.3303	105.991	97.8922	98.9803	100.272	99.9966	98.1227	97.0469	99.3937	97.1973	109.932	98.8294	97.0962	100.23	100.066	99.0321	101.025	103.003	97.6232	100.204	98.9088	97.8377	97.7424	100.636	99.3794	97.5527	93.8918	98.3446	95.6886	104.585	98.9006	99.532	97.798	97.0829	98.4402	98.3962	100.305	97.7134	120.239	97.0537	99.9285	96.4619	99.4029	96.3907	98.0219	100.947	100.188	99.0314	99.3157
99.0047	98.0834	107.246	97.8565	98.4149	100.778	100.397	97.7689	97.2257	100.74	96.9792	110.187	98.1224	96.8321	100.576	99.3202	98.7634	100.211	101.805	99.0824	98.8654	99.2013	99.7952	98.7452	102.016	100.692	98.7396	94.7715	98.6624	95.7169	103.209	98.2531	99.6739	98.601	96.639	98.6729	99.1778	101.214	97.1451	119.718	96.2344	100.539	95.5955	98.1298	96.2275	98.2255	99.18	100.245	99.649	99.2823
99.495	98.0208	105.696	97.5933	98.4517	100.716	100.555	97.9667	96.7325	99.4039	97.3619	109.797	101.001	96.5187	99.5444	98.6935	98.9025	100.213	102.628	97.792	99.9926	97.8299	96.6316	98.8855	100.71	99.6689	98.5268	95.3875	98.681	95.7372	104.398	98.0448	99.7778	98.4899	96.9213	99.8691	98.1958	102.154	97.7897	120.498	97.8472	101.653	95.6583	99.0382	97.3347	97.3437	99.2882	100.617	99.3417	99.6969
99.4569	97.8621	104.176	97.6771	98.3489	100.166	99.9927	98.0638	97.0911	98.8523	97.4185	110.03	97.8373	95.4773	100.55	97.6606	99.0917	101.356	103.078	99.7512	98.7055	97.6733	98.8893	97.3348	102.366	100.411	98.1945	95.1037	98.811	96.2107	106.371	98.4298	100.905	98.1214	96.7625	98.8343	99.9796	103.011	97.978	121.508	98.0488	101.744	94.7694	99.6159	98.0781	98.0208	99.4385	100.861	99.2289	99.9123
99.5031	98.2048	104.355	97.3019	97.6526	99.9994	99.78	97.7712	97.468	99.2499	97.2123	110.055	98.4847	96.4669	101.317	98.1786	99.1482	100.77	103.121	98.7635	99.3065	97.7228	97.6684	97.3909	102.24	100.402	98.4211	97.1231	99.3632	95.7437	105.824	97.9671	101.787	99.0337	97.5437	98.781	99.0074	103.065	98.0488	120.98	97.1222	102.412	95.084	98.8224	98.7404	98.1262	98.491	100.506	100.584	100.032
99.1164	99.2667	105.529	97.1045	97.2808	100.137	100.664	97.9531	97.3884	99.7986	97.2069	110.524	95.7854	96.1215	100.037	98.463	99.2579	101.029	103.689	100.382	99.8584	96.5758	98.6571	97.9363	101.016	100.77	98.7352	95.5047	99.497	94.7625	104.749	98.4816	101.19	97.6526	97.3116	98.9209	99.2667	103.825	97.7095	121.529	96.5289	101.041	95.972	98.9595	99.2026	98.1695	99.0468	100.389	100.229	99.1437
99.6025	98.6822	106.198	96.584	97.1245	99.3268	99.9312	97.7986	97.4693	99.7311	96.0863	111.196	96.8241	95.9807	100.87	98.1578	98.7043	100.823	104.153	99.5012	98.9474	97.0081	97.2857	96.3894	102.51	101.137	98.9147	96.9289	100.201	94.6315	106.046	98.4047	100.435	97.5679	98.0559	98.6249	99.71	104.488	97.7915	121.723	96.7468	100.65	95.4676	99.7893	100.541	98.2204	98.8857	100.233	99.6709	100.1
99.0985	99.5631	106.837	96.4265	96.9453	99.0273	99.8201	98.6109	97.9029	99.0409	96.0088	111.264	97.4483	98.0046	101.066	98.2565	99.0057	101.985	103.779	99.1754	98.9769	97.3657	97.3598	98.0934	101.297	101.555	98.6119	97.4665	99.1795	94.4446	104.989	98.4314	100.108	97.7354	97.0838	98.5536	99.8123	104.606	97.1087	121.175	95.9704	100.58	96.0538	99.4579	99.9323	97.598	99.4523	101.924	102.186	100.36
99.0063	98.8638	106.623	95.901	96.908	99.1448	100.026	98.1425	97.7321	98.6795	95.5216	110.97	97.1659	97.4564	101.957	99.5215	98.8374	102.026	103.372	99.1071	98.8832	95.5598	96.0758	97.8883	101.906	100.728	98.343	97.6159	100.685	94.8429	103.989	98.9297	99.4114	98.006	96.2347	98.6625	99.6091	104.074	97.4436	123.833	95.8717	100.86	95.9407	99.1546	101.655	98.7873	98.7396	101.072	101.985	100.574
98.8938	97.4625	107	95.8059	96.8349	99.1392	100.525	98.0268	97.7588	97.2038	95.6924	111.385	97.4388	97.5477	101.813	100.257	98.8147	100.227	103.55	98.8473	99.452	96.8819	97.3885	98.4338	101.03	101.076	97.9668	99.2534	100.497	95.0696	104.591	99.7418	100.905	98.2171	96.2873	98.8932	100.185	105.093	97.0134	123.19	95.9287	101.36	94.9862	99.0805	102.087	97.8835	98.2713	101.682	100.959	100.595
100.344	97.7128	106.43	95.8871	96.8236	98.9509	100.8	98.5921	98.4312	98.9287	95.4697	110.307	97.4295	98.371	102.555	99.8762	98.7552	100.796	104.309	99.3502	99.4184	95.7119	97.4587	97.9291	102.249	102.149	98.7505	97.5334	99.7813	94.3278	105.855	99.4596	100.316	97.6214	96.7518	98.5587	100.615	104.097	96.9169	124.936	95.347	102.024	96.2199	100.261	102.856	97.9296	98.5639	102.196	101.064	99.8724
99.8097	98.1719	105.452	95.912	96.4966	99.2327	100.355	98.9158	98.5589	98.6673	95.1105	111.291	96.7336	98.0949	101.48	100.404	98.7486	100.469	104.023	100.466	99.8883	96.2589	96.2292	97.0517	102.265	101.951	100.127	98.5696	100.343	94.1378	105.245	100.26	101.926	97.7105	98.406	98.8721	100.756	105.242	97.8316	122.08	96.4188	102.206	96.0004	100.131	103.314	97.8741	99.6463	102.445	101.131	100.416
100.131	98.6579	107.657	96.2006	96.687	98.7983	100.121	98.4771	98.0468	98.2446	95.3641	110.341	98.1293	98.4902	103.111	101.152	98.5142	100.989	103.201	101.465	101.205	96.2438	96.0321	98.0467	102.108	101.459	101.306	100.586	100.702	95.0834	105.802	99.3615	99.4552	97.7952	97.3815	97.6847	100.831	103.442	97.2057	122.535	96.5879	101.491	95.835	100.482	103.405	97.5228	98.7456	102.265	100.905	100.27
99.5482	105.897	115.672	94.7639	95.9999	98.6183	100.756	97.8447	98.1638	97.4933	95.4119	110.746	101.449	98.5709	102.9	101.247	98.6665	100.92	103.267	102.802	100.488	95.5368	96.3932	97.321	101.822	102.661	100.06	99.0732	101.358	95.3768	105.355	99.47	99.8753	97.9727	97.8349	98.0225	100.009	102.905	97.4348	123.166	96.2665	102.509	96.4196	101.514	104.727	97.9133	98.2268	103.969	102.82	101.715
98.8478	99.2574	107.654	96.9001	96.3496	98.6746	100.512	97.9863	98.4387	98.109	94.9407	111.894	96.9968	99.1975	102.807	100.516	98.5957	101.95	104.531	103.079	100.361	96.0112	96.2849	98.91	102.702	103.211	100.703	100.073	101.437	94.9904	104.251	99.4029	99.9327	98.4799	97.7039	97.8925	100.495	104.018	97.1385	123.418	96.6192	103.998	96.052	100.995	103.145	98.8068	98.0581	103.425	102.047	101.18
98.8839	100.157	106.904	96.315	96.5585	98.4034	100.933	98.1835	97.5645	97.8261	95.7379	111.781	98.2876	97.633	103.892	101.649	99.7644	101.611	104.396	102.787	99.208	95.0499	95.9148	99.4972	102.076	103.787	100.741	101.014	101.734	95.6899	105.342	98.9904	101.568	100.559	98.1769	98.0561	101.076	103.945	96.711	123.952	96.5106	102.982	96.4487	101.174	103.062	98.9954	98.1159	103.495	101.549	101.298
99.3962	99.3817	107.047	97.37	96.2263	98.2698	100.824	97.2973	98.2624	98.3865	94.9158	111.753	98.5654	99.1383	103.775	100.962	99.9518	103.714	103.339	104.016	99.5981	95.5342	94.6816	99.408	103.154	104.21	101.755	100.58	101.112	95.6078	104.826	100.076	101.503	100.26	97.6761	98.5431	101.622	103.252	97.4291	123.047	97.2896	102.786	96.8223	101.506	103.977	98.323	99.1274	102.212	102.805	101.188
98.8521	100.408	105.676	97.2212	96.8676	98.8538	101.38	97.0817	98.6082	98.0189	94.9388	113.516	99.8982	99.8794	104.356	100.844	99.917	103.807	104.137	105.074	99.4095	95.9436	95.8783	98.6596	102.535	103.896	101.234	102.361	102.959	94.3668	104.634	100.491	100.796	100.416	97.9504	98.8507	101.328	103.132	97.8593	122.023	96.884	102.617	97.7551	100.913	104.949	99.038	98.385	102.675	101.779	102.08
98.1818	99.6624	105.801	97.9434	97.3065	97.8909	101.723	96.4789	99.1923	98.0544	95.0725	114.216	98.9932	100.749	105.148	100.072	100.033	102.692	103.952	104.322	99.5494	96.2555	96.6214	100.158	103.698	104.477	101.207	102.057	102.205	95.8594	105.612	100.301	100.613	99.1102	97.7359	100.003	100.551	104.301	96.6216	122.447	96.3845	102.433	97.0789	101.335	105.015	98.4252	98.5758	101.798	102.277	102.181
98.6666	100.556	106.238	97.3889	96.7364	98.4857	101.623	96.1812	99.1393	98.5779	95.1463	113.396	98.2587	100.267	103.488	101.35	100.479	105.842	105.501	105.152	100.172	95.7804	94.8227	98.8164	102.808	103.824	101.466	102.226	103.225	95.2706	104.593	100.571	101.398	99.7701	98.5915	98.8212	101.389	103.325	96.8702	123.511	95.9105	102.767	97.0389	101.159	104.779	98.2507	98.5928	101.694	102.559	102.075
99.2281	100.718	106.98	97.3719	96.6551	98.1879	102.021	96.6264	98.9777	98.9603	95.4311	113.243	98.2096	100.128	104.093	101.588	101.25	106.105	104.903	105.931	100.757	95.1512	95.6416	98.0799	103.281	104.414	102.395	103.862	102.144	95.2507	106.017	99.8125	101.955	99.9273	98.7935	97.8395	101	103.092	96.6784	124.683	96.046	101.714	97.6253	101.261	106.019	98.0649	98.5214	101.945	103.141	102.376
99.8257	100.863	107.072	97.949	97.0625	98.1126	101.464	95.9463	99.5259	98.0832	94.9447	113.217	97.7324	99.2377	104.659	101.924	101.159	106.318	105.479	106.102	100.818	94.8018	96.3759	97.9525	104.015	104.415	101.793	102.641	102.306	95.433	106.406	100.37	100.961	99.0644	97.2693	99.1771	101.97	103.163	97.0711	124.227	96.1932	102.143	97.3607	101.452	105.567	98.431	98.5513	101.048	103.199	102.028
99.6203	101.227	106.475	98.5272	96.5865	98.7829	101.727	95.4594	99.1739	98.6282	95.1912	112.687	97.5823	99.1693	104.047	102.241	101.393	107.358	104.652	104.931	100.855	95.3206	95.1421	99.376	103.912	104.797	102.427	103.117	102.178	94.8851	104.986	100.796	100.969	98.5782	98.5477	99.3182	100.947	103.238	96.1697	124.938	96.2982	103.867	99.0416	102.313	105.844	98.8634	98.2469	101.572	103.431	102.464
98.4838	101.541	105.214	98.3321	96.6038	98.3254	101.653	95.805	99.4828	97.3623	94.8011	112.866	97.9254	100.191	104.649	102.349	101.502	105.853	105.393	104.783	101.29	95.308	97.178	98.0031	103.792	104.945	102.14	103.961	102.556	96.0059	105.288	100.112	101.776	98.6875	98.0124	99.11	100.413	102.542	95.9855	124.428	96.9844	102.499	98.1334	102.393	106.6	97.3609	98.548	101.413	103.096	102.166
98.7694	101.84	103.379	98.5044	96.6751	98.2112	101.25	95.1221	99.4503	97.6031	95.4454	114.199	97.9653	99.6325	105.523	102.939	102.102	105.809	104.758	105.406	102.271	95.4475	95.2894	97.9081	104.101	105.232	102.962	104.31	100.522	95.8657	106.137	101.182	102.222	98.6489	98.3152	100.632	100.598	103.256	96.3431	125.574	97.4985	103.919	98.5214	102.555	107.889	98.9851	98.6003	101.338	102.25	102.412
99.3141	102.083	105.632	98.4394	97.5519	98.4502	101.674	95.3571	98.7715	98.6159	95.2794	112.513	97.7569	100.987	106.268	103.816	102.177	106.464	105.84	106.469	100.815	96.1934	93.1956	98.2444	103.877	106.348	101.078	104.589	101.264	96.9953	107.52	100.427	100.799	98.9014	98.2258	99.0778	101.216	102.406	95.8128	126.474	98.0638	103.723	99.968	102.726	107.453	98.0799	100.085	101.296	102.788	102.842
98.7002	102.694	106.469	98.0925	98.112	98.8069	102.195	95.8194	99.9736	98.2525	95.0929	113.596	98.0532	100.907	105.988	102.735	102.794	106.66	105.914	105.781	101.574	95.2518	94.1257	97.0099	103.009	106.562	101.634	102.49	100.01	96.4174	105.824	102.273	101.226	99.0252	97.4185	99.1873	101.942	102.176	96.0321	127.513	98.7342	103.907	99.99	103.34	107.385	98.1893	99.2834	101.889	103.788	103.233
98.8994	101.751	105.864	98.3945	97.1219	97.2496	101.661	94.942	99.8847	98.07	94.6572	114.778	98.4737	101.186	106.54	102.481	102.643	107.972	106.04	105.482	101.069	96.2469	93.0826	98.0656	104.052	106.5	100.835	103.642	101.368	97.4588	107.603	101.521	99.7189	98.0932	97.6038	99.2578	103	103.106	96.5657	127.762	97.8307	104.076	99.5196	102.888	108.985	98.6209	100.068	101.63	103.35	103.037
99.0808	102.317	107.606	98.1141	96.8099	97.7677	101.698	95.2601	99.561	98.284	94.4124	115.687	97.3552	102.243	107.027	103.403	103.448	108.148	105.916	106.108	101.428	96.0936	95.2097	98.7703	103.636	105.995	102.639	104.305	100.144	97.706	106.869	101.829	101.169	98.8618	97.8846	99.4503	102.711	103.339	97.46	127.813	98.7789	103.005	98.4086	103.339	108.186	98.6848	99.7961	102.506	103.544	102.183
98.6441	102.658	105.398	98.4766	97.2028	98.2815	101.718	95.2585	99.1316	98.4486	95.0845	117.363	99.7086	102	106.387	102.779	103.249	106.315	105.77	106.434	101.288	96.2734	94.8556	99.1931	103.934	107.052	102.889	104.198	102.205	97.251	107.479	102.509	101.47	99.3666	98.2369	99.9112	101.736	103.009	96.6234	127.684	97.9116	102.958	98.5887	102.851	107.371	98.426	101.066	102.811	104.962	103.233
99.4344	104.55	105.471	97.7332	97.1657	99.0415	101.819	94.7736	99.2949	98.4134	95.0756	117.062	98.672	102.609	106.953	103.288	103.549	107.113	105.615	107.421	102.298	95.6436	94.0948	99.7333	103.625	107.693	102.746	103.059	102.654	97.761	108.386	102.075	102.393	99.6822	97.4035	99.807	101.947	103.049	96.8498	129.068	97.0637	103.046	99.593	103.42	107.913	98.0755	101.538	103.011	104.609	102.901
99.6549	104.6	105.822	98.214	97.3297	98.7116	102.255	95.0853	99.2678	98.09	94.8361	114.347	98.5975	101.786	107.662	102.939	104.09	107.179	105.969	108.458	102.735	95.2411	93.2142	98.8527	104.354	107.7	103.039	105.186	101.191	97.3428	108.519	102.579	101.057	98.9983	98.0405	100.291	102.758	101.894	96.4758	128.351	97.7927	103.947	99.3703	103.611	108.632	99.704	101.313	103.496	105.01	103.1
99.1425	103.866	106.93	98.2162	97.106	98.6893	102.097	95.5779	99.6325	98.4417	95.4964	114.651	98.801	103.667	107.289	103.16	104.609	108.553	105.825	111.381	103.753	95.7423	92.1559	99.0926	103.563	107.452	103.484	103.241	101.106	97.6146	107.774	102.365	101.346	100.226	98.5135	101.158	101.963	102.66	96.3534	130.937	97.9751	104.554	99.8138	105.098	107.76	99.003	101.638	104.543	104.769	103.29
99.5675	104.522	106.546	98.8084	97.2305	99.1724	102.259	95.2013	99.0581	97.7585	95.1334	114.747	98.3887	103.166	107.239	103.031	104.416	107.687	106.04	111.375	103.125	95.7267	94.4198	97.5356	104.161	108.051	103.149	104.134	101.505	97.504	108.028	102.649	102.982	100.397	97.5542	101.918	101.85	102.387	96.1707	129.16	97.6856	104.058	100.514	104.178	108	98.108	102.07	104.125	105.075	103.302
99.7265	104.795	106.665	98.516	96.7762	98.8107	102.752	94.9225	99.1646	97.8516	94.303	115.738	98.5364	103.244	108.203	103.32	104.362	107.664	105.65	110.762	103.466	95.5986	93.093	99.2666	104.469	108.606	103.154	104.925	101.76	98.5137	108.614	103.006	100.35	99.7832	97.6263	100.988	102.151	103.314	96.4793	129.836	97.5556	105.197	100.036	105.182	107.313	99.4171	102.262	104.272	104.353	103.903
98.925	104.964	106.853	98.0833	96.3841	98.0929	103.043	95.0034	98.7138	96.4643	94.2412	115.456	98.9805	104.287	107.285	103.558	104.527	107.396	107.141	109.553	103.845	96.6166	94.0616	98.7434	104.184	108.933	104.225	105.219	101.266	97.5976	107.876	102.795	102.151	101.358	97.5574	101.476	101.656	103.25	96.787	129.697	97.4502	105.273	100.269	104.695	107.487	99.2586	102.768	104.497	104.941	104.246
97.8522	104.972	106.497	98.3721	96.9718	97.4958	103.066	94.9265	99.6079	98.1508	94.1918	115.612	100.12	103.979	108.354	103.83	104.724	108.26	107.243	107.187	103.36	97.6503	94.4716	98.1619	103.489	109.096	103.891	104.755	101.296	98.0532	106.674	103.431	102.987	100.771	98.2275	101.295	101.93	103.705	95.844	130.337	97.7713	105.31	99.7144	105.715	108.428	99.0858	102.861	104.504	107.227	104.757
97.8626	104.856	105.668	98.7274	96.3898	96.8416	102.77	94.7145	99.305	97.5326	94.1726	116.011	98.9853	102.44	107.696	104.041	104.348	109.057	106.74	108.724	103.09	97.9122	93.7348	97.6448	104.277	108.725	104.183	105.264	101.54	97.5283	107.723	102.893	102.433	99.9529	98.4722	101.594	102.16	102.679	96.4696	130.594	97.3057	105.759	100.68	105.166	107.224	99.3854	103.655	105.158	104.638	103.955
97.6378	105.635	106.651	98.4384	96.3745	97.5664	103.344	94.1297	98.6596	97.6789	94.686	116.018	98.1124	104.315	108.331	104.587	104.626	108.055	106.707	108.446	104.813	98.632	92.4145	98.8081	104.413	108.313	105.133	104.963	101.309	97.8784	106.771	102.875	101.475	99.6715	99.0769	102.243	101.337	102.477	96.4094	130.032	97.1937	106.267	100.076	105.235	108.219	98.918	104.052	104.729	105.218	104.057
97.8085	104.913	107.303	98.6228	96.2393	97.8766	102.317	94.7244	98.9733	98.4827	94.5963	115.756	97.7549	104.219	108.965	105.084	105.21	109.09	106.485	107.893	103.569	97.1493	93.5848	98.6318	104.265	107.95	104.296	104.774	100.503	97.7986	109.594	101.991	101.993	100.664	97.2609	102.492	101.456	103.803	96.4791	129.115	97.6135	106.24	100.54	105.638	107.488	99.0906	103.937	105.274	104.272	105.393
97.3764	105.12	107.229	98.4309	95.8166	97.5945	102.939	93.9168	98.4715	98.1093	93.8998	115.117	98.574	103.771	108.293	104.383	105.092	107.478	107.025	108.883	103.407	96.7234	92.858	98.5922	104.547	108.849	104.591	105.497	102.157	96.6467	108.713	101.057	102.345	100.803	98.0313	103.276	102.168	102.423	96.1726	130.563	97.6712	105.806	100.281	106.166	107.82	99.0053	104.365	104.762	104.963	104.587
97.9372	105.334	106.662	98.9166	96.1872	99.2155	103.28	94.3216	99.1412	98.2468	94.3521	115.63	98.9693	104.665	108.439	104.654	105.597	109.051	107.18	110.165	103.365	96.495	94.4106	98.3351	105.628	108.647	104.27	105.576	101.352	97.2226	108.804	100.998	101.894	101.26	99.4369	104.023	101.095	103.398	96.3574	130.464	97.7752	105.438	100	105.561	108.73	97.8484	104.84	105.017	105.993	103.52
97.8581	105.804	105	99.276	96.2517	99.0109	103.518	94.2548	98.4989	98.3037	94.5716	115.723	98.967	102.839	107.4	104.332	105.404	109.591	106.904	109.86	104.289	96.1306	91.9524	98.6654	105.044	108.96	104.541	104.864	102.098	97.9298	109.227	101.237	102.414	101.093	99.8677	102.583	101.433	101.729	96.1338	130.536	97.3937	106.596	99.3818	106.126	108.367	98.5766	105.247	105.674	106.968	103.384
97.8202	105.675	106.331	98.8344	96.1101	98.4864	102.789	94.1908	97.9992	97.6005	94.8369	115.584	99.1891	105.698	109.181	104.207	105.766	108.76	106.027	110.587	104.833	97.452	93.7355	98.0674	105.383	108.628	104.578	105.707	101.911	97.8352	109.147	102.17	101.174	99.266	99.4249	101.881	102.754	101.311	96.7635	131.093	97.4115	105.93	99.8538	104.82	108.059	98.7963	105.748	105.659	106.584	103.499
98.0264	106.288	107.419	99.4974	95.5433	99.5211	102.815	94.3099	98.4098	98.0243	93.8299	116.169	97.6922	104.54	109.461	104.617	105.857	109.823	106.23	111.105	105.742	96.6413	93.5994	98.3999	105.543	108.03	103.817	106.304	101.739	96.6568	108.597	105.207	100.198	100.636	99.5269	102.496	101.69	99.793	96.206	129.991	97.6664	105.437	98.8859	105.343	107.428	98.984	105.887	106.132	105.044	103.774
97.9361	106.025	106.792	99.7765	95.288	99.2309	102.531	94.6261	98.6772	98.533	94.2865	117.41	98.7435	104.329	109.103	104.181	105.994	109.167	104.801	109.901	104.377	96.7226	94.0902	98.783	105.679	108.112	103.699	105.51	101.614	97.9707	110.755	102.1	101.024	100.018	100.635	103.765	101.582	99.7128	96.4482	131.25	96.8174	107.223	99.9096	105.012	107.673	98.9487	105.145	106.616	106.251	103.617
97.8464	105.645	106.382	100.486	94.8542	98.1577	103.045	94.3047	98.7899	97.7197	94.4011	117.07	98.7694	106.024	109.79	104.219	105.786	109.247	105.635	109.647	104.297	95.9286	94.5027	99.6205	104.923	107.644	104.443	105.925	102.246	96.4489	110.544	100.338	100.398	100.237	100.788	102.745	101.46	100.037	96.2161	130.105	97.6803	106.151	99.2006	105.542	108.184	99.1801	105.267	107.677	106.452	103.927
97.7118	104.907	106.456	99.875	94.5393	98.4937	102.76	94.258	99.5127	99.3681	93.6976	117.683	98.8665	105.684	111.39	104.142	106.323	109.065	106.151	110.162	104.692	95.7113	92.8199	99.1647	104.947	107.901	104.883	106.694	100.648	96.8564	109.919	101.673	99.8605	100.603	100.354	104.211	102.052	99.8195	96.9529	130.466	97.6276	106.444	98.6177	105.695	109.293	98.8181	105.195	107.391	105.634	103.815
[truncated: 15 more columns]

## Sheet: all
1	1	1	1	1	1	1	1	1	1	1	1	3	3	3	4	4	5	5	5	5	5	6	6	6	6	6	6	6	6	6	6	7	7	7	7	7	8	8	8	8	8	8	8	9	9	9	1	2	3
100	100	100	100	100	100	100	100	100	100	100	100	100	100	100	100	100	100	100	100	100	100	100	100	100	100	100	100	100	100	100	100	100	100	100	100	100	100	100	100	100	100	100	100	100	100	100	100	100	100
100.108	98.9307	98.4592	98.9471	99.6463	101.968	98.8385	101.503	98.9191	99.2123	101.332	101.305	100.332	99.7037	100.423	99.2096	99.7149	99.586	99.2072	99.6192	99.3569	99.3126	100.296	99.8242	99.8985	99.5349	99.8088	100.525	100.009	99.5675	100.579	101.505	99.3636	100.714	100.504	99.1129	99.3935	102.277	99.3703	99.6911	98.5025	99.1628	99.7717	100.262	99.8933	99.3389	100.1	98.9423	101.112	99.991
103.339	98.5928	98.5914	98.9994	100.006	103.415	99.5887	101.909	99.4541	100.559	102.82	102.028	99.5304	100.282	100.772	100.012	100.765	99.0426	100.987	98.961	99.556	99.4742	100.925	99.9813	99.5379	99.7946	100.405	100.085	99.9056	99.4917	101.007	101.149	100.554	102.434	101.004	98.6921	99.9578	102.067	98.8568	100.072	98.5919	98.7072	99.3666	99.8462	99.9123	100.558	101.884	99.0471	100.905	100.381
103.733	99.0197	98.2519	99.2992	99.5253	105.165	98.98	101.926	97.5355	102.525	104.757	103.735	98.4075	99.6834	101.35	100.362	99.1858	97.94	99.8229	99.0293	100.066	98.1603	100.297	101.251	97.7542	98.476	100.056	99.9868	99.3486	98.5558	99.5573	100.985	99.9204	101.223	100.563	98.3231	100.23	101.649	98.5653	99.0266	96.0404	98.9402	99.6364	99.1945	99.9685	100.682	100.908	98.7049	102.739	98.712
103.331	98.309	98.063	99.004	99.6034	106.194	99.1388	103.36	96.8516	102.995	104.445	104.534	98.8312	98.7113	101.869	100.377	98.7234	97.6747	99.1969	99.4185	99.1622	98.5731	100.112	100.133	96.6772	98.053	99.8867	99.7922	99.3274	98.6839	99.2942	101.884	100.199	101.143	101.785	98.3109	100.812	101.913	97.8182	99.1362	93.518	98.8035	99.7592	98.2389	99.8484	100.165	100.783	98.9657	102.421	101.13
103.171	98.7656	96.6551	98.9285	99.1034	106.218	98.6315	103.072	97.1452	104.18	103.424	103.188	98.258	97.6418	101.352	101.367	98.5314	98.1393	100.321	98.537	99.8267	98.1064	100.883	99.3247	96.6604	97.5557	99.5379	99.5642	100.199	97.9743	99.4051	101.878	100.187	101.115	101.016	98.125	100.656	102.31	97.0302	98.9717	93.15	98.0343	99.3374	98.647	99.0063	99.5331	100.464	98.9282	102.554	99.6237
103.869	97.6971	96.7853	97.8444	99.0066	106.856	98.1464	102.755	97.3816	103.206	104.351	103.22	101.673	98.4142	100.559	101.508	96.6977	98.3818	99.4885	98.4621	98.2578	98.0889	101.261	101.613	96.9196	98.7907	99.1917	99.4557	99.4281	98.6566	100.348	102.791	100.372	101.57	100.919	97.5603	100.977	102.161	97.4134	98.8156	93.3025	98.5073	100.071	99.025	98.9305	99.3816	99.9766	99.7082	104.055	101.348
104.249	97.9083	96.5869	97.807	99.0016	107.687	98.7129	102.49	96.6496	104.969	103.803	103.569	102.478	97.2663	100.552	102.339	97.4377	98.4396	98.9104	98.9462	98.7506	98.8031	101.795	101.259	96.534	99.0601	99.5852	99.4378	98.707	98.9364	100.524	102.026	99.7187	102.751	99.9325	96.5523	100.997	102.523	98.0306	99.5452	92.2626	98.0498	98.9192	99.1418	99.2612	99.7927	100.371	98.6816	102.789	100.895
104.395	97.8937	96.9151	97.8225	99.0225	107.823	98.3331	102.558	97.4459	106.079	103.812	103.505	102.336	97.6173	100.39	101.964	96.6393	98.6272	98.6592	98.4747	98.4801	98.2796	100.428	100.283	95.9374	99.3854	99.649	100.027	98.944	100.171	98.7518	101.713	99.9061	101.667	100.467	95.8244	102.167	101.976	96.9318	98.9991	93.1204	96.5788	99.5105	98.7918	98.7471	98.855	99.8919	97.2399	102.609	102.004
104.062	97.8744	97.4674	98.1854	98.5137	107.506	98.9043	102.697	97.5454	106.277	103.822	104.186	103.885	98.0807	96.8409	101.584	98.2525	98.0184	98.5404	98.9551	98.047	98.5472	97.7835	101.388	97.385	98.9238	98.1078	101.595	100.806	95.4259	101.259	104.253	100.601	102.889	99.1762	95.1891	103.625	102.508	96.5022	95.434	91.7865	101.014	98.4663	98.5607	99.7275	101.2	100.745	97.8405	102.692	102.066
104.511	96.8906	98.1167	97.2135	97.8681	107.704	98.4224	102.262	97.3697	107.463	103.533	103.721	104.057	98.393	97.5179	102.127	98.533	98.1848	98.7547	99.9039	97.963	97.3876	97.1755	99.7816	97.2744	99.5015	97.2394	102.022	100.558	95.2287	102.25	104.084	101.48	102.589	99.3918	94.3953	104.824	101.591	96.4454	95.0415	92.5621	100.822	98.4274	98.6751	100.083	100.602	101.188	97.9474	102.464	102.906
104.236	97.5329	96.822	96.7416	97.0762	108.431	97.4678	103.398	96.318	108.094	103.935	103.185	103.541	97.7825	97.1954	102.026	98.3087	98.6743	98.179	100.434	99.895	98.0069	97.0526	100.023	96.6173	99.2076	97.7749	102.432	100.307	95.3722	101.792	103.018	100.882	102.185	99.0262	94.5099	105.065	100.822	96.1275	93.9662	91.0042	100.019	98.9317	98.414	99.7972	101.018	101.119	97.1651	102.644	101.834
104.421	96.9494	97.0116	97.1015	97.7103	109.438	97.1205	102.422	96.57	108.484	102.871	103.62	102.856	96.8373	97.5779	102.074	98.4558	97.2516	97.5896	103.068	97.5365	97.7467	97.2556	100.065	96.2395	99.3638	97.8927	102.508	100.811	95.6925	101.022	104.423	101.665	102.84	99.3245	95.1685	105.494	100.524	95.3625	93.7554	91.0769	99.8542	99.4606	97.9564	99.8516	101.213	102.139	97.1554	102.51	102.09
105.478	96.0932	96.4735	97.4995	98.6528	109.932	97.6083	102.097	96.1289	108.515	102.539	103.061	102.994	97.8515	97.728	101.711	98.7653	97.0335	98.0177	103.524	98.6924	97.7222	96.6349	99.7889	96.4781	98.8452	97.5508	102.876	100.135	95.8315	101.835	104.047	101.384	102.869	98.9373	94.4655	105.186	100.282	94.5623	92.9318	90.6271	99.5752	99.8406	97.9544	100.494	101.328	101.999	96.9918	102.075	102.256
108.664	95.4772	97.5057	94.8415	98.6061	111.315	99.7183	104.122	96.9257	112.979	102.989	106.183	102.872	97.8035	98.148	101.777	98.0578	97.2717	97.5086	103.613	99.4755	97.8566	96.403	99.617	96.9122	98.6354	98.6913	102.779	99.9905	95.8197	102.26	104.992	101.454	102.805	98.779	94.0857	105.151	99.7708	94.9123	92.4901	91.0726	99.3986	100.514	98.2246	100.134	101.131	102.253	97.1174	102.574	102.652
107.882	96.0278	98.1166	94.4855	98.3674	110.939	99.8099	103.566	95.8644	113.406	103.652	104.892	102.775	96.2815	97.4782	102.403	98.3852	97.4007	96.8998	103.922	99.725	97.6967	96.6322	99.1831	97.0462	97.9924	98.363	103.405	100.104	95.9519	101.614	104.487	101.197	102.833	98.9947	94.1298	106.168	99.7816	95.0695	92.2833	90.5563	98.7885	100.195	99.3003	100.669	102.041	101.654	95.6639	102.091	101.934
107.73	95.8259	98.2187	94.3862	97.6359	110.625	99.167	103.063	96.1622	114.419	103.036	105.69	102.611	96.618	97.64	101.79	98.5361	97.0801	96.8716	104.341	98.6927	97.6352	96.6427	98.9302	96.0746	97.3536	98.2127	103.379	99.337	95.1686	101.299	105.186	101.539	102.55	99.173	93.951	106.688	98.4953	95.1684	92.6207	90.6096	98.2259	100.798	98.3392	100.712	101.861	102.579	97.3528	102.291	102.965
109.193	95.688	97.9974	93.7417	97.3949	111.31	99.0648	102.777	96.6578	113.986	104.123	105.289	103.046	97.4231	97.5666	102.31	98.1805	97.7237	96.5056	104.842	98.5022	97.5	97.2128	98.921	97.7358	97.4075	98.2772	103.615	99.5856	95.3018	101.539	105.402	102.565	102.847	99.2137	93.7019	107.708	98.7347	94.8548	91.6541	90.716	98.7437	99.9237	98.9642	101.183	102.014	102.375	96.6245	101.213	102.936
109.453	95.5663	98.4036	94.0615	98.026	112.326	98.5992	103.989	95.8035	115.044	103.875	105.035	102.405	96.0397	97.5743	102.595	98.5915	96.9595	95.9159	105.133	97.5482	97.4927	97.0186	100.166	97.7615	97.2934	98.6985	103.554	99.8563	95.7933	102.049	105.231	101.141	102.474	98.7602	92.8694	108.32	98.705	94.8553	92.4645	90.5725	97.9341	100.803	98.9186	101.268	102.214	102.637	96.3742	100.873	101.604
109.248	95.7939	98.0806	94.4279	97.9258	111.106	100.077	104.347	96.6905	116.251	104.512	107.063	103.988	97.8229	96.3518	102.295	96.9379	96.7176	96.3891	105.331	99.5396	97.3922	97.1291	100.399	97.3509	97.002	98.2846	103.878	98.7924	96.3411	102.983	105.122	102.808	102.448	98.5632	91.5043	110.024	100.11	94.9156	89.1318	92.0568	98.3784	98.994	100.338	101.506	102.038	102.213	96.0321	101.436	101.472
108.442	95.7926	97.8093	93.5094	96.6705	111.354	99.0429	104.838	96.3683	117.479	104.874	106.677	103.862	96.5143	95.9234	102.292	97.6438	96.7502	95.7699	105.551	98.3727	96.9524	96.3089	99.9822	97.0966	96.704	97.8808	103.493	98.6485	95.7746	100.874	104.381	103.313	102.549	98.3162	91.633	110.5	99.6055	94.6553	88.8395	91.7399	98.1685	98.4277	100.582	101.228	103.464	102.068	95.8706	101.175	103.119
108.322	96.0721	97.6687	93.5166	97.6232	110.47	98.5781	104.346	96.216	118.257	105.682	107.297	103.149	96.3596	96.2325	102.369	97.4163	96.6969	96.4325	105.841	98.1824	97.2632	96.3433	99.8286	97.183	96.3057	98.3097	103.546	97.9698	96.8395	100.077	104.909	103.191	103.836	98.6169	91.4277	110.827	99.885	94.3274	88.4611	91.3351	97.4823	98.7058	100.416	101.495	102.069	102.567	95.7546	100.515	100.394
109.021	95.9832	97.3753	93.2669	96.8586	110.751	98.7603	104.287	96.0963	118.325	105.602	106.755	103.355	96.3964	96.9151	103.216	97.2459	96.6357	96.6128	105.334	98.1231	96.8075	96.376	99.1945	96.7134	96.0224	98.1414	103.508	98.0188	96.4725	99.729	104.748	103.073	102.028	98.2457	91.0026	111.513	100.163	93.8909	88.6593	91.5808	97.2732	99.0503	100.457	101.339	102.004	103.393	95.1091	102.252	100.933
109.453	97.1336	97.4092	94.1006	96.9851	111.923	98.7037	104.664	95.7129	119.411	106.79	106.752	102.941	96.1226	96.3013	102.832	97.1695	96.508	95.6815	106.095	99.5035	96.9394	96.9044	100.257	97.3498	95.4062	98.3933	103.211	97.3789	96.0856	99.6616	105.125	104.868	102.956	98.4514	90.5096	111.909	100.118	93.4648	88.0327	90.8948	97.7622	98.6303	100.395	102.004	102.719	102.251	94.9721	101.331	102.644
110.042	96.9148	97.9629	93.9508	97.1254	111.21	97.8997	104.375	95.2243	119.228	106.256	106.892	102.985	96.5781	96.3257	103.5	97.4532	96.0705	95.0509	106.951	98.3561	96.6024	95.7721	100.659	97.7939	95.6792	97.959	103.405	97.3792	96.5857	100.652	105.419	104.356	102.725	98.0711	89.4402	112.352	99.7768	93.348	87.6982	91.5005	96.8867	99.4111	100.684	101.626	102.937	101.747	95.0337	101.618	104.994
109.769	98.0589	96.9712	94.1832	96.5236	112.143	98.8556	104.601	95.17	120.385	108.107	106.955	102.913	96.4552	96.4639	103.124	96.9758	95.6807	95.6566	106.642	97.5304	96.0481	96.8429	100.677	97.3902	95.3094	98.1869	103.183	97.9221	95.9328	100.367	105.594	104.72	102.12	98.1786	89.4077	111.514	100.071	93.3836	87.0892	91.4543	97.5804	99.1469	100.805	101.601	102.871	101.841	94.4025	101.755	106.012
110.608	97.2671	97.3272	95.3176	97.1908	112.685	97.7846	104.182	95.1987	121.124	107.802	106.688	103.668	95.672	97.1041	102.998	97.7899	96.1941	96.2453	107.389	98.4608	96.4597	98.4252	100.709	98.1266	94.9243	97.8279	102.687	97.6223	95.6814	100.257	105.048	106.055	101.54	98.3983	89.9929	111.294	99.6249	93.8902	86.6747	90.0942	97.7409	99.661	100.875	101.641	102.973	101.887	94.6763	101.687	105.716
109.444	96.4293	98.0593	94.9218	96.0399	112.705	98.8281	104.426	95.0241	121.18	108.443	107.676	103.471	96.7056	96.6907	103.342	97.9527	95.6744	95.6243	107.381	98.214	95.9113	99.0322	100.257	98.4616	94.6894	98.0748	103.226	98.2028	95.8623	100.271	107.268	105.661	101.948	97.8507	88.8155	111.152	99.0421	92.9498	87.2059	90.7708	98.1111	98.3784	101.086	101.391	102.803	101.779	95.2305	101.487	104.65
109.549	97.1483	97.8207	94.2347	94.9152	112.517	99.6782	104.586	95.0229	121.007	107.598	107.449	102.731	96.1606	96.6004	104.185	97.3527	94.844	96.2968	107.791	97.4051	96.5263	97.7887	99.8133	98.6896	94.2875	98.0077	103.172	97.9952	96.8896	99.8859	106.603	107.154	102.1	97.5864	89.4664	110.465	99.4026	93.3075	86.957	90.7435	98.6994	98.5632	101.012	101.223	102.371	102.216	96.6565	101.716	106.192
109.814	98.1885	99.4314	94.608	93.7855	111.915	99.2054	104.919	94.5024	122.08	108.438	107.705	103.043	95.7602	96.7969	104.883	98.057	96.5614	96.2189	104.995	99.3636	98.0776	98.9662	99.8059	97.9119	94.6973	98.47	105.596	97.4987	95.9525	100.584	106.376	107.984	102.229	97.9359	89.8773	110.777	99.014	92.6629	86.0835	91.1648	97.6082	98.0625	100.543	102.999	103.139	104.457	96.4304	99.3364	104.376
109.853	98.6415	99.2253	94.1772	94.0406	111.777	99.1554	105.278	94.9133	122.288	108.187	107.765	102.36	95.153	96.5742	104.469	97.5354	96.4878	96.0279	105.261	99.0653	97.8168	98.8483	100.185	98.5495	94.3254	98.8776	105.8	97.6923	96.7323	99.8879	106.711	107.943	102.138	97.5967	88.9936	110.804	99.9891	92.6956	86.1486	90.7849	98.579	98.2424	101.02	103.042	102.881	104.648	97.2822	99.1884	106.738
109.843	98.4591	99.2211	94.566	94.2846	111.61	100.122	105.189	94.5667	122.214	108.637	107.707	102.885	95.0872	97.5754	105.172	97.9559	96.2976	96.589	105.349	98.517	98.1307	97.6852	98.7665	98.4731	94.2948	98.6799	105.633	97.1681	96.7291	100.34	106.503	108.258	101.899	97.5428	89.1912	110.437	99.0928	92.8639	86.848	90.331	97.0536	99.0914	100.273	102.71	102.709	104.631	97.0542	100.201	104.787
109.762	98.1732	99.7411	94.1287	93.8993	111.044	100.956	105.915	95.0828	122.953	109.283	108.229	102.435	96.5254	97.375	105.167	97.9173	96.0133	96.322	106.055	98.8	98.8095	100.134	99.9751	97.6424	93.4265	98.7655	105.051	97.2831	96.5571	99.7009	106.777	107.85	101.668	97.3728	88.7454	110.285	99.0997	93.0857	86.4158	90.5079	98.6724	100.567	101.438	102.819	102.751	105.096	96.7888	99.9279	104.591
109.553	99.2846	100.473	95.0408	94.3195	110.864	101.174	105.364	94.8182	123.759	109.972	108.756	102.116	96.1503	97.3368	105.498	97.5991	95.8739	96.4818	106.04	98.0822	98.3059	99.3828	100.349	97.9462	93.7563	99.2336	105.636	97.6942	96.2875	101.001	107.533	108.84	102.177	97.505	89.4503	110.89	98.7191	92.9003	86.721	90.4754	97.981	99.7346	100.491	103.856	102.87	105.657	96.9375	100.081	106.554
111.638	99.6161	100.918	95.1683	94.1898	114.451	102.244	105.4	95.722	124.465	109.398	109.463	102.282	95.8851	97.6208	105.577	97.7838	95.4168	96.5063	106.684	99.5048	98.0179	99.6299	100.6	97.6539	93.2978	99.4205	106.058	97.1145	97.0574	100.305	107.468	108.695	101.63	97.1028	89.145	110.694	99.3901	92.7821	86.1588	90.1347	98.6257	100.52	100.651	104.864	102.589	105.399	97.0787	100.862	106.404
112.375	99.1435	101.54	94.8814	93.7052	114.431	102.051	104.401	95.2461	125.143	110.731	108.881	102.898	96.1664	97.3767	105.543	97.6922	95.758	96.3309	106.709	98.5631	98.4261	100.197	100.597	97.9784	93.0938	98.8098	105.681	97.7995	96.2963	99.3823	107.25	108.641	101.319	96.9405	88.9568	110.751	98.5349	92.961	85.8997	91.9204	98.4018	101.671	101.15	105.443	103.234	105.345	97.4738	101.112	106.361
112.929	99.2849	100.941	95.2351	94.4125	114.392	101.147	104.713	95.3167	125.679	111.642	109.476	104.182	96.444	97.6678	105.577	98.2768	95.4593	96.7469	107.374	98.6006	97.4754	99.5593	101.817	97.9156	92.7592	98.4313	105.982	98.2477	96.4394	100.649	108.182	109.246	101.405	97.5031	88.4372	111.021	98.4873	92.2861	85.3882	90.3061	98.4514	100.407	101.532	104.573	102.528	105.498	98.1192	101.143	105.55
114.481	98.5808	101.098	95.8419	94.2403	114.964	100.25	103.324	94.9904	125.378	111.145	109.566	103.88	95.5385	97.6392	105.383	98.1539	95.5021	97.3784	107.668	98.3205	97.7788	99.5857	101.58	98.4137	93.0978	98.7176	106.077	97.9037	96.8146	100.944	108.577	108.936	101.875	97.2564	89.0739	111.778	99.1566	92.7952	85.8789	90.7282	97.8951	100.387	101.513	105.3	102.43	106.102	97.0096	100.147	103.428
112.587	99.8292	100.909	94.6257	94.0255	113.936	100.34	104.099	94.6546	124.608	112.392	109.153	104.176	94.8701	97.7831	105.873	97.7908	96.47	97.1587	108.653	100.184	97.8317	99.1989	100.866	98.0209	92.9099	97.8947	105.757	97.9638	96.6689	101.185	107.402	109.732	101.693	97.5631	89.092	111.311	98.3503	93.4	85.9445	91.06	99.3814	100.494	101.313	105.918	102.822	106.598	97.3909	101.393	105.562
112.672	100.338	101.757	97.6491	93.4488	114.337	101.106	105.603	95.196	127.211	111.605	109.009	105.836	95.1799	98.0223	105.825	97.4662	95.5444	96.8855	108.903	98.9158	97.5227	96.9498	100.398	97.6623	93.0349	97.9714	105.442	97.5093	96.0436	100.724	108.726	109.57	101.67	97.5467	88.1376	110.697	98.0901	93.287	84.9858	90.5043	99.2055	101.226	101.563	106.24	102.735	106.412	97.6143	100.608	106.609
112.188	100.153	101.23	97.6851	92.4273	113.875	100.796	105.56	94.6115	126.821	112.246	109.364	104.93	95.3096	98.939	105.868	98.1484	95.7531	96.6826	108.791	98.1308	97.671	97.3543	101.347	98.9591	92.9097	98.5345	105.54	97.3282	97.2876	102.176	108.11	108.249	101.794	97.6939	88.0243	109.743	98.1685	93.573	85.7973	91.2267	98.222	101.272	102.203	104.861	102.368	107.179	99.1564	101.188	104.439
112.811	99.0165	101.61	98.8334	93.4272	114.468	100.381	105.917	94.1295	128.303	112.692	109.473	105.498	96.2383	98.9932	106.288	98.3929	95.7289	96.4858	109.357	98.5365	98.0769	97.5081	101.275	98.6631	92.6862	98.642	105.764	97.1641	96.6357	100.778	108.796	109.603	101.574	97.6245	88.5548	109.956	97.9145	93.6772	85.4473	91.4588	98.0128	102.57	101.97	106.008	102.757	106.358	98.2408	100.562	105.641
112.174	99.4248	102.136	99.0824	92.4706	113.843	101.1	105.268	94.2174	127.633	113.768	109.417	104.526	95.7371	99.6236	106.649	98.4046	95.356	96.3487	108.753	98.3617	97.9878	97.0608	101.157	98.9132	92.795	98.9352	105.745	96.5592	96.4697	99.6778	108.519	108.748	101.911	98.0973	88.0595	110.775	97.6661	93.1514	85.2666	91.1939	98.3945	102.012	101.968	106.599	103.457	107.086	98.8006	100.686	103.605
113.332	99.3075	104.109	98.6708	92.3857	114.786	101.612	105.286	93.9688	128.006	113.389	109.76	105.429	94.7083	99.8845	106.698	99.2453	95.4623	96.9801	109.714	97.9452	97.6353	96.7644	100.981	99.3946	93.0642	98.6057	104.767	97.5068	96.7266	102.429	108.718	108.33	102.267	97.1371	88.3924	110.995	98.1053	93.1108	84.6445	91.7842	98.3026	102.305	101.666	105.769	102.633	106.856	98.4211	99.4914	103.522
113.31	100.827	104.763	99.4866	92.4512	114.8	101.28	105.849	93.1403	126.768	114.407	109.191	105.103	95.1586	99.9423	106.066	99.0683	95.8552	97.3335	110.268	99.6466	98.0994	97.8516	99.9233	99.2738	92.8275	99.6033	105.652	97.5365	95.9724	102.241	108.925	108.541	102.18	97.1818	88.3438	110.817	97.7664	93.0442	84.5514	91.647	98.9535	101.817	102.021	107.162	103.785	107.195	99.2034	99.5725	103.521
114.85	101.383	104.559	100.302	92.2477	113.607	101.558	105.189	93.9001	127.511	114.177	108.989	104.691	95.4977	100.22	106.2	99.0555	95.704	97.0596	110.647	99.4234	97.739	97.2806	99.5825	98.7851	92.8186	98.604	105.8	97.3677	96.531	102.132	108.826	108.221	102.588	98.0782	88.9773	110.707	98.2749	94.0471	85.3098	91.8171	97.8025	102.314	102.729	108.78	103.186	106.164	98.0088	100.632	103.644
115.847	100.435	105.419	100.89	91.78	115.51	101.543	104.746	93.9745	127.192	114.02	108.686	104.892	94.9461	100.842	106.512	98.6085	95.8895	97.4354	111.586	99.0648	97.4262	96.9338	100.76	98.9645	92.8082	99.4132	106.385	96.9633	96.1703	102.288	109.429	108.536	102.571	97.8082	87.9663	111.464	98.1762	93.0015	84.4648	92.9072	97.2673	101.972	102.53	108.791	103.261	106.563	98.7038	99.2909	102.444
114.546	99.4766	105.51	101.258	91.0504	112.938	101.752	105.706	93.57	127.339	114.245	108.253	104.886	94.9891	100.866	106.536	98.8891	96.1138	97.6871	110.698	99.4535	97.9717	97.0151	100.301	98.9401	92.8462	99.6785	106.313	97.0364	96.8762	102.101	110.08	107.058	102.549	97.409	87.6598	111.132	98.1365	93.5957	84.7312	93.3364	99.5479	102.949	102.963	108.111	103.748	108.278	98.0682	100.595	102.845
114.861	99.5773	106.114	101.518	90.3022	113.209	100.848	104.744	93.4538	126.195	114.049	107.99	104.531	95.3622	101.381	106.28	98.8762	96.1332	97.1957	112.052	99.5506	97.559	97.0881	102.028	99.3145	92.7116	99.6747	105.543	97.6071	96.2924	102.734	109.908	108.071	102.829	97.7429	87.5668	111.019	97.4987	93.7886	84.3398	93.3253	98.8586	103.516	103.448	109.042	103.863	106.956	98.4483	100.334	103.062
114.812	99.0877	106.456	101.795	92.9883	115.059	101.788	106.091	94.1821	126.947	114.411	108.541	105.442	94.6559	101.705	106.301	98.8891	95.9595	97.13	111.841	99.3594	98.2128	97.0487	100.359	99.0994	92.4262	99.9656	105.968	97.7082	96.4641	102.987	109.932	107.47	103.111	97.9515	87.6325	111.289	98.0047	93.3975	84.0858	94.0295	100.181	103.272	103.957	110.021	103.615	107.958	97.576	99.4263	102.535
115.201	99.4157	107.184	101.82	93.0694	116.397	101.589	107.021	94.2155	128.051	115.811	108.747	105.998	94.9925	101.441	106.766	98.6401	95.7861	98.142	112.198	99.5543	98.5743	96.8396	100.249	99.2513	92.7358	100.04	105.73	97.6379	96.4058	102.348	110.293	108.497	103.455	98.6352	88.5486	111.153	98.1155	93.3903	84.1139	94.2648	99.8899	103.774	103.62	109.38	103.139	108.205	97.1319	100.342	101.791
115.243	99.9	106.5	101.066	93.2342	115.828	100.953	106.912	94.0744	127.731	114.955	109.07	106.501	94.6225	101.556	106.907	98.88	96.2586	97.7349	112.22	100.399	98.4136	95.8936	100.295	99.2185	92.7747	99.9005	105.799	97.4776	95.9198	102.78	111.202	108.12	103.621	98.8263	88.1317	111.703	98.0522	93.9886	84.5332	94.5416	99.5196	103.552	104.434	109.08	103.474	109.244	96.0647	99.4054	101.356
115.784	99.4584	107.036	101.839	93.4533	116.041	101.31	106.783	94.8331	128.304	115.647	110.229	105.949	95.0084	102.058	107.188	98.8344	95.4556	97.3471	112.075	99.3671	98.7472	96.2777	101.259	100.109	92.7609	99.3576	105.435	96.9281	96.046	103.398	111.014	108.899	103.302	99.1269	88.2589	111.396	98.1192	94.4283	84.6941	95.4753	100.337	103.301	103.664	109.762	103.184	108.186	96.5711	99.7314	99.2186
116.499	99.3009	106.793	101.284	93.4999	116.552	100.949	105.996	94.0288	127.31	115.858	110.092	105.213	94.1598	102.055	107.186	99.3533	96.9803	97.29	112.68	99.9938	98.4284	96.0476	100.908	100.31	92.6821	99.5813	105.99	97.4412	96.5251	103.05	111.557	108.336	103.742	99.4964	89.0121	112.296	98.3329	95.0635	84.2167	95.2984	100.922	103.171	104.58	109.714	103.884	109.172	96.105	99.1414	100.012
117.397	100.112	107.814	102.2	93.0728	116.382	101.362	106.62	94.8295	127.737	114.903	109.171	106.047	93.7775	101.585	107.183	99.2853	98.0375	98.086	112.452	99.3476	98.4766	96.0187	101.844	100.693	93.2005	99.7842	105.826	97.6641	95.846	102.192	111.152	108.168	103.054	99.4433	89.3046	112.008	97.8745	94.603	84.9124	95.8253	100.096	102.589	104.608	110.518	104.168	109.376	96.4144	99.3179	100.706
118.257	99.3998	108.659	102.072	93.7849	114.671	102.187	106.865	94.1878	128.136	114.865	108.952	107.703	94.4902	102.211	106.868	99.602	97.8706	98.5663	113.54	101.054	98.5085	96.9448	103.317	100.693	93.1922	99.3848	106.372	96.9169	97.4475	104.412	111.268	108.28	103.02	99.9112	89.3874	111.472	98.179	94.7881	84.8763	97.0806	100.143	104.051	104.811	110.293	104.74	109.284	96.9592	98.3832	98.8427
117.795	99.0364	108.814	102.989	93.9956	114.737	101.205	106.089	94.3237	128.891	117.134	108.524	107.184	93.0462	102.243	107.133	99.7637	98.6992	97.9478	113.192	99.9191	98.641	97.945	101.277	101.206	93.5201	99.2611	106.267	97.7083	96.6232	104.447	111.402	108.375	103.28	99.7439	88.5541	112.2	98.044	94.0118	84.6509	96.0071	99.7004	104.068	105.052	111.123	104.72	109.879	97.4444	97.1687	97.7137
117.025	98.6455	108.298	102.421	94.2191	114.431	100.859	105.491	94.8101	129.949	115.355	108.961	108.597	93.6794	102.085	107.764	100.1	97.4279	98.1312	113.374	100.859	99.115	96.5492	100.841	100.672	93.3931	99.4771	106.447	98.2086	97.3248	102.522	111.742	109.035	103.407	99.2945	89.2117	112.467	97.8854	94.5355	84.6171	97.0583	100.151	104.446	105.013	110.933	104.405	109.771	96.8226	96.9394	98.4534
117.731	100.308	108.459	101.882	94.6055	114.338	102.116	106.741	94.2928	130.081	116.711	109.71	107.545	93.3885	103.447	108.467	100.031	97.4768	98.1015	114.293	101.563	99.163	96.8015	101.517	101.266	93.6316	99.3345	106.531	97.5094	97.5528	101.857	110.541	109.388	103.895	99.716	88.5965	112.411	97.9736	94.0052	83.9092	97.7487	100.459	104.039	105.592	110.604	105.076	110.31	96.2109	97.2243	98.0709
116.006	100.439	108.593	101.077	94.6886	114.412	103.071	106.338	94.8142	130.144	117.067	109.642	107.503	93.5795	102.861	108.488	99.6627	96.9058	98.9568	114.598	101.286	99.2781	95.8771	100.515	101.079	93.4591	98.9902	105.951	97.7532	96.6871	101.916	111.503	108.84	103.908	99.2023	89.0092	112.691	97.3069	93.9485	84.7398	96.9022	100.995	102.715	105.888	109.904	105.002	111.162	97.821	96.5791	97.9337
116.593	99.6567	109.063	102.227	94.3626	114.911	103.034	105.69	94.7654	130.267	117.486	110.518	106.573	94.1832	103.195	108.781	100.451	97.728	98.4548	114.783	102.486	98.9865	96.928	101.668	101.709	93.2465	98.6998	106.56	97.1366	97.7729	101.111	112.918	109.453	103.26	100.121	88.8927	112.301	97.5983	94.2294	85.5642	97.8897	100.795	103.727	106.012	110.559	105.109	111.418
[truncated: 122 more columns]
