# Supplementary material for: A mechano-osmotic feedback couples cell volume to the rate of cell deformation
Source: eLife journal article supplement (doi:10.7554/elife.72381), 2022-04-13
Supplement: supp [file pll_peg.xlsx]

## Sheet: Sheet1
t	c	c_st	y	y_st	e	e_st
0	100	5.80156e-15	100	4.91997e-15	100	6.3266e-15
1	100.049	1.26958	99.9625	0.904619	100.253	1.05377
2	100.211	1.80778	99.975	1.37167	100.298	1.49582
3	100.305	2.16433	100.05	1.80387	100.338	1.99035
4	100.499	2.60983	100.005	2.26073	100.565	2.44864
5	100.613	2.88307	100.081	2.62022	100.815	2.8349
6	100.64	3.14175	100.115	2.87205	101.08	3.20234
7	100.789	3.40942	100.165	3.11638	101.319	3.54571
8	100.865	3.62492	100.217	3.28914	101.706	3.86163
9	100.958	3.81791	100.27	3.48694	101.801	4.13817
10	101.029	3.98646	100.286	3.63437	102.11	4.37925
11	101.104	4.14649	100.308	3.81996	102.35	4.71299
12	101.206	4.3431	100.388	4.0088	102.657	4.96435
13	101.144	4.49576	100.369	4.13559	102.909	5.23547
14	101.188	4.53624	100.371	4.25507	103.222	5.44749
15	101.157	4.63612	100.4	4.37155	103.406	5.67536
16	101.202	4.78438	100.379	4.52168	103.635	5.84543
17	101.309	5.00552	100.348	4.60139	103.95	6.03672
18	101.364	5.00496	100.328	4.65885	104.174	6.27965
19	101.335	4.98892	100.378	4.73479	104.463	6.52409
20	101.453	5.14608	100.363	4.7828	104.593	6.62883
21	101.511	5.17097	100.399	4.81545	104.768	6.79326
22	101.591	5.22269	100.394	4.83712	105.071	6.89025
23	101.782	5.4106	100.49	4.94123	105.023	6.94845
24	101.757	5.40922	100.507	5.04896	105.292	7.03952
25	101.836	5.50089	100.587	5.0896	105.455	7.17689
26	102.045	5.57536	100.567	5.13202	105.604	7.2197
27	102.1	5.61351	100.681	5.17186	105.909	7.26907
28	102.383	5.70666	100.767	5.32667	106.115	7.34273
29	102.424	5.58242	100.789	5.32332	106.169	7.38935
30	102.495	5.64876	100.825	5.35856	106.498	7.49551
31	102.615	5.6161	101.054	5.44374	106.683	7.57887
32	102.808	5.75739	101.062	5.48779	106.77	7.7279
33	103.007	6.30033	101.129	5.60439	106.941	7.73298
34	103.152	6.09161	101.344	5.5149	106.976	7.74291
35	103.416	6.73609	101.438	5.5598	107.16	7.87516
36	103.572	6.5294	101.461	5.50636	107.242	7.92172
37	103.534	6.02151	101.483	5.57575	107.361	7.96425
38	103.602	5.99893	101.788	5.6752	107.462	8.04953
39	103.755	6.14542	101.839	5.65865	107.611	8.07631
40	103.852	6.04908	101.907	5.7468	107.744	8.12212
41	103.994	5.90901	102.115	5.85531	107.79	8.16763
42	104.106	6.22382	102.22	5.8534	107.816	8.17562
43	104.205	6.10653	102.295	5.90044	107.871	8.24856
44	104.278	5.99055	102.372	5.96165	107.918	8.31177
45	104.393	6.14455	102.635	6.05746	107.973	8.29856
46	104.475	6.18509	102.625	6.03288	107.907	8.31916
47	104.485	5.96873	102.647	6.08408	107.922	8.26291
48	104.589	5.86316	103.027	6.17	107.829	8.31089
49	104.807	6.02665	103.022	6.21868	107.893	8.36819
50	104.922	5.9398	103.059	6.28112	107.923	8.36609
51	104.4	5.32222	103.32	6.32525	107.842	8.38875
52	104.51	5.24451	103.293	6.31338	107.904	8.32256
53	104.691	5.38421	103.328	6.36091	107.92	8.31952
54	104.743	5.43637	103.543	6.45484	107.971	8.34404
55	104.769	5.61161	103.536	6.48291	108.116	8.3986
56	104.806	5.75048	103.629	6.52945	108.162	8.45268
57	104.994	5.61319	103.612	6.55315	108.184	8.32753
58	105.069	5.53558	103.879	6.65595	108.255	8.49664
59	105.147	5.35717	103.947	6.70476	108.374	8.47601
60	105.287	5.30008	103.928	6.81143	108.408	8.52704
