# Supplementary material for: A mechano-osmotic feedback couples cell volume to the rate of cell deformation
Source: eLife journal article supplement (doi:10.7554/elife.72381), 2022-04-13
Supplement: supp [file Ponder_relation.xlsx]

## Sheet: Sheet1
condition	P0 (mOsm)	P1 (mOsm)	delta V (%)	V1/V0	P0/P1	n	stdev V1/V0 (%)
control HYPO
50% H2O	346	177	61.3957	1.61396	1.9548	107	0.13693
10% H2O	344	311	11.4841	1.11484	1.10611	30	0.0300259
30% H2O	354	247	31.1503	1.3115	1.4332	25	0.0673766
40% H2O	351	227	41.6953	1.41695	1.54626	18	0.0689306
50% H2O	360	180	67.1874	1.67187	2	17	0.116334
10% H2O	348	314	10.0317	1.10032	1.10828	80	0.0366228
30% H2O	359	281	21.5935	1.21593	1.27758	47	0.061847
50% H2O	358	187	63.2447	1.63245	1.91444	18	0.115157
20% H2O	345	275	23.9256	1.23926	1.25455	17	0.0412133
10% H2O	346	305	7.72758	1.07728	1.13443	15	0.0194488
20% H2O	341	276	14.939	1.14939	1.23551	142	0.0411022
40% H2O	343	214	31.4945	1.31495	1.6028	69	0.0740226
50% H2O	328	200	34.6357	1.34573	1.64	72	0.110036
40% H2O	326	235	30.2974	1.30393	1.38723	132	0.0469196
control HYPER
10% PEG400	346	916	-45.9508	0.540492	0.377729	62	0.0651477
1% PEG400	340	392	-9.66702	0.90333	0.867347	34	0.0315536
2% PEG400	355	431	-14.6517	0.853483	0.823666	33	0.0275323
5% PEG400	347	575	-29.8549	0.701451	0.603478	67	0.0380713
4% PEG400	318	513	-22.2335	0.781312	0.619883	54	0.0285983
1% PEG400	347	364	-6.71895	0.934066	0.953297	67	0.0391524
1% PEG400	347	364	-6.8574	0.930683	0.953297	75	0.0345358
1% PEG400	347	364	-6.53748	0.933869	0.953297	40	0.042166
3% PEG400	329	420	-14.2608	0.856439	0.783333	90	0.0289377
3% PEG400	329	420	-13.0606	0.869036	0.783333	54	0.0292563
5% PEG400	326	532	-24.0842	0.755562	0.612782	95	0.0331421
5% PEG400	326	532	-24.4105	0.754715	0.612782	74	0.059136
EIPA HYPER
4% PEG400	318	513	-19.5383	0.805761	0.619883	40	0.0351658
1% PEG400	347	364	-6.68751	0.933195	0.953297	66	0.0417785
3% PEG400	329	420	-14.7909	0.852511	0.783333	30	0.0326288
5% PEG400	326	532	-23.1876	0.768313	0.612782	25	0.043898
5% PEG400	326	532	-26.8823	0.734327	0.612782	109	0.0458679
EIPA HYPO
50% H2O	328	200	40.2249	1.40159	1.64	48	0.146158
40% H2O	326	235	39.8871	1.39369	1.38723	84	0.116305
40% H2O	326	235	36.6963	1.3638	1.38723	79	0.0652074
Lat A HYPO
50% H2O	346	177	71.7767	1.71777	1.9548	72	0.139983
10% H2O	383	354	12.9752	1.12975	1.08192	66	0.0405482
30% H2O	388	285	31.3571	1.31357	1.3614	27	0.076927
10% H2O	388	348	7.77778	1.07778	1.11494	63	0.0777778
Lat A HYPER
10% PEG400	346	916	-49.0752	0.509248	0.377729	31	0.0487515
ISO
same medium	346	346	2.44953	1.0245	1	61
same medium	338	338	1.15523	1.01155	1	51
same medium	344	344	0.552258	1.00552	1	40
same medium	342	342	1.62617	1.01626	1	67
