# Supplementary material for: A mechano-osmotic feedback couples cell volume to the rate of cell deformation
Source: eLife journal article supplement (doi:10.7554/elife.72381), 2022-04-13
Supplement: supp [file population_4h.xlsx]

## Sheet: Sheet1
ID	Name	lineage	Volume (µm3)	Area(pix)	Area (um2)	Perim (pix)	Perim (um)	Circ	AR	Round	Solidity	V/A		0.349839	correlation coefficient				V (µm3)	A (µm2)
13072017_20X_LDandApo_HeLa15_w21 GFP.TIF	2017-01-01	1	3290.11	9434	981.195	376.203	121.325	0.838	1.178	0.849	0.958	3.35317						average	2433.74	1034.51
13072017_20X_LDandApo_HeLa15_w21 GFP.TIF	2017-01-02	2	1959.34	8076	839.954	353.564	114.024	0.812	1.203	0.831	0.931	2.33268						stdev	676.058	440.968
13072017_20X_LDandApo_HeLa15_w21 GFP.TIF	2017-01-03	3	1910.6	7076	735.948	319.993	103.198	0.868	1.198	0.834	0.967	2.59611
13072017_20X_LDandApo_HeLa15_w21 GFP.TIF	2017-01-04	4	1560.51	6242	649.207	323.833	104.436	0.748	1.799	0.556	0.953	2.40371
13072017_20X_LDandApo_HeLa15_w21 GFP.TIF	2017-01-05	5	3078.87	13788	1434.04	447.632	144.361	0.865	1.022	0.978	0.969	2.14699
13072017_20X_LDandApo_HeLa15_w21 GFP.TIF	2017-01-06	6	2163.86	9186	955.401	366.271	118.122	0.86	1.209	0.827	0.965	2.26488
13072017_20X_LDandApo_HeLa17_w21 GFP.TIF	2017-01-01	1	2496.92	11076	1151.97	405.585	130.801	0.846	1.286	0.777	0.962	2.16752
13072017_20X_LDandApo_HeLa17_w21 GFP.TIF	2017-01-02	2	3192.24	10066	1046.93	405.996	130.934	0.767	1.272	0.786	0.912	3.04915
13072017_20X_LDandApo_HeLa17_w21 GFP.TIF	2017-01-03	3	2472.1	10582	1100.59	390.816	126.038	0.871	1.269	0.788	0.961	2.24615
13072017_20X_LDandApo_HeLa19_w21 GFP.TIF	2017-01-01	1	2602.4	10366	1078.13	409.522	132.071	0.777	1.692	0.591	0.974	2.41381
13072017_20X_LDandApo_HeLa19_w21 GFP.TIF	2017-01-02	2	3086.62	16747	1741.79	475.338	153.297	0.931	1.213	0.824	0.989	1.77209
13072017_20X_LDandApo_HeLa19_w21 GFP.TIF	2017-01-03	3	1398.36	5157	536.36	339.079	109.353	0.564	2.519	0.397	0.873	2.60712
13072017_20X_LDandApo_HeLa19_w21 GFP.TIF	2017-01-04	4	2734.74	13810	1436.33	435.616	140.486	0.915	1.23	0.813	0.976	1.90398
13072017_20X_LDandApo_HeLa21_w21 GFP.TIF	2017-01-01	1	4671.17	16120	1676.58	490.185	158.085	0.843	1.12	0.893	0.96	2.78613
13072017_20X_LDandApo_HeLa21_w21 GFP.TIF	2017-01-02	2	3069.57	14919	1551.67	464.493	149.799	0.869	1.099	0.91	0.958	1.97824
13072017_20X_LDandApo_HeLa21_w21 GFP.TIF	2017-01-03	3	3006.15	1684	175.147	151.313	48.7984	0.924	1.076	0.929	0.966	17.1636
13072017_20X_LDandApo_HeLa21_w21 GFP.TIF	2017-01-04	4	2218.73	1496	155.593	145.8	47.0205	0.884	1.442	0.694	0.967	14.2598
13072017_20X_LDandApo_HeLa23_w21 GFP.TIF	2017-01-01	1	4070.2	16066	1670.96	474.651	153.075	0.896	1.144	0.874	0.973	2.43584
13072017_20X_LDandApo_HeLa23_w21 GFP.TIF	2017-01-02	2	2597.88	9034	939.592	366.924	118.333	0.843	1.835	0.545	1	2.7649
13072017_20X_LDandApo_HeLa23_w21 GFP.TIF	2017-01-03	3	2895.98	10554	1097.68	425.036	137.074	0.734	1.445	0.692	0.917	2.63827
13072017_20X_LDandApo_HeLa23_w21 GFP.TIF	2017-01-04	4	2329.96	6632	689.769	309.559	99.8328	0.87	1.668	0.6	0.999	3.37788
13072017_20X_LDandApo_HeLa23_w21 GFP.TIF	2017-01-05	5	3253.1	12051	1253.38	422.135	136.139	0.85	1.17	0.855	0.955	2.59546
13072017_20X_LDandApo_HeLa25_w21 GFP.TIF	2017-01-01	1	987.904	11060	1150.31	469.114	151.289	0.632	2.087	0.479	0.941	0.858816
13072017_20X_LDandApo_HeLa25_w21 GFP.TIF	2017-01-02	2	1427.85	7924	824.146	336.208	108.427	0.881	1.445	0.692	0.969	1.73252
13072017_20X_LDandApo_HeLa25_w21 GFP.TIF	2017-01-03	3	1463.41	16039	1668.16	490.417	158.159	0.838	1.551	0.645	0.97	0.877264
13072017_20X_LDandApo_HeLa27_w21 GFP.TIF	2017-01-01	1	3956.99	19619	2040.5	536.773	173.109	0.856	1.01	0.99	0.954	1.93923
13072017_20X_LDandApo_HeLa27_w21 GFP.TIF	2017-01-02	2	2185.57	8714	906.31	374.651	120.825	0.78	1.388	0.72	0.938	2.4115
13072017_20X_LDandApo_HeLa27_w21 GFP.TIF	2017-01-03	3	2486.31	13736	1428.63	440.328	142.006	0.89	1.058	0.945	0.97	1.74034
13072017_20X_LDandApo_HeLa29_w21 GFP.TIF	2017-01-01	1	2669.47	10349	1076.36	404.05	130.306	0.797	1.039	0.963	0.942	2.48009
13072017_20X_LDandApo_HeLa29_w21 GFP.TIF	2017-01-02	2	2259.11	4752	494.238	260.345	83.9613	0.881	1.098	0.911	0.983	4.57089
13072017_20X_LDandApo_HeLa29_w21 GFP.TIF	2017-01-03	3	2146.13	6858	713.275	311.208	100.365	0.89	1.247	0.802	0.976	3.00883
13072017_20X_LDandApo_HeLa29_w21 GFP.TIF	2017-01-04	4	1802.09	5725	595.436	283.933	91.5684	0.892	1.097	0.912	0.973	3.02651
13072017_20X_LDandApo_HeLa29_w21 GFP.TIF	2017-01-05	5	2225.15	6589	685.297	314.712	101.495	0.836	1.32	0.758	0.968	3.24699
13072017_20X_LDandApo_HeLa29_w21 GFP.TIF	2017-01-06	6	2068.38	7931	824.874	357.123	115.172	0.781	1.412	0.708	0.932	2.50751
13072017_20X_LDandApo_HeLa31_w21 GFP.TIF	2017-01-01	1	1285.15	7691	799.912	429.541	138.527	0.524	1.321	0.757	0.795	1.60661
13072017_20X_LDandApo_HeLa31_w21 GFP.TIF	2017-01-02	2	1992.24	6197	644.527	307.575	99.1929	0.823	1.3	0.769	0.933	3.091
13072017_20X_LDandApo_HeLa31_w21 GFP.TIF	2017-01-03	3	2536.82	18839	1959.37	581.656	187.584	0.7	1.393	0.718	0.889	1.29471
13072017_20X_LDandApo_HeLa33_w21 GFP.TIF	2017-01-01	1	2432.86	7950	826.85	332.708	107.298	0.903	1.089	0.918	0.984	2.94233
13072017_20X_LDandApo_HeLa33_w21 GFP.TIF	2017-01-02	2	2139.17	6628	689.353	327.197	105.521	0.778	1.535	0.651	0.933	3.10315
13072017_20X_LDandApo_HeLa33_w21 GFP.TIF	2017-01-03	3	1953.02	8151	847.755	379.869	122.508	0.71	1.51	0.662	0.893	2.30376
13072017_20X_LDandApo_HeLa35_w21 GFP.TIF	2017-01-01	1	4655.1	19170	1993.8	573.016	184.798	0.734	1.364	0.733	0.916	2.33479
13072017_20X_LDandApo_HeLa35_w21 GFP.TIF	2017-01-02	2	3021.33	14222	1479.18	508.678	164.049	0.691	1.524	0.656	0.907	2.04257
13072017_20X_LDandApo_HeLa35_w21 GFP.TIF	2017-01-03	3	2414.12	8836	918.999	368.137	118.724	0.819	1.399	0.715	0.951	2.6269
13072017_20X_LDandApo_HeLa35_w21 GFP.TIF	2017-01-04	4	3102.28	11236	1168.61	400.158	129.051	0.882	1.23	0.813	0.971	2.65467
13072017_20X_LDandApo_HeLa37_w21 GFP.TIF	2017-01-02	2	1652.67	14453	1503.2	456.757	147.304	0.871	1.222	0.818	0.969	1.09944
13072017_20X_LDandApo_HeLa37_w21 GFP.TIF	2017-01-03	3	1939.51	6106	635.062	333.356	107.507	0.69	1.67	0.599	0.88	3.05405
13072017_20X_LDandApo_HeLa37_w21 GFP.TIF	2017-01-05	5	3196.25	18237	1896.76	561.288	181.015	0.727	1.15	0.87	0.902	1.68511
13072017_20X_LDandApo_HeLa39_w21 GFP.TIF	2017-01-01	1	2944.47	12988	1350.83	448.443	144.623	0.812	1.324	0.755	0.959	2.17975
13072017_20X_LDandApo_HeLa39_w21 GFP.TIF	2017-01-02	2	2645.7	10748	1117.86	450.235	145.201	0.666	1.38	0.725	0.879	2.36676
13072017_20X_LDandApo_HeLa39_w21 GFP.TIF	2017-01-03	3	1516.6	7440	773.807	332.687	107.292	0.845	1.007	0.993	0.942	1.95993
13072017_20X_LDandApo_HeLa41_w21 GFP.TIF	2017-01-01	1	2220.86	14519	1510.07	540.215	174.219	0.625	1.219	0.82	0.846	1.4707
13072017_20X_LDandApo_HeLa41_w21 GFP.TIF	2017-01-02	2	3009.28	14254	1482.51	489.981	158.019	0.746	1.143	0.875	0.923	2.02986
13072017_20X_LDandApo_HeLa41_w21 GFP.TIF	2017-01-03	3	4533.16	9648	1003.45	382.167	123.249	0.83	1.677	0.596	0.974	4.51756
13072017_20X_LDandApo_HeLa43_w21 GFP.TIF	2017-01-01	1	3030.72	11776	1224.78	402.583	129.833	0.913	1.11	0.901	0.974	2.47451
13072017_20X_LDandApo_HeLa43_w21 GFP.TIF	2017-01-02	2	2633.22	10940	1137.83	398.709	128.584	0.865	1.029	0.972	0.949	2.31425						y	x
13072017_20X_LDandApo_HeLa43_w21 GFP.TIF	2017-01-03	3	3024.85	14772	1536.38	458.626	147.907	0.883	1.095	0.913	0.96	1.96882						100	10
13072017_20X_LDandApo_HeLa43_w21 GFP.TIF	2017-01-04	4	2510.89	9982	1038.19	393.287	126.835	0.811	1.307	0.765	0.944	2.41852						0.01	1000
13072017_20X_LDandApo_HeLa43_w21 GFP.TIF	2017-01-05	5	4401.88	2855	296.938	192.208	61.9871	0.971	1.069	0.935	0.997	14.8242
13072017_20X_LDandApo_HeLa45_w21 GFP.TIF	2017-01-01	1	2181.79	6553	681.553	331.466	106.898	0.75	1.491	0.671	0.935	3.2012
13072017_20X_LDandApo_HeLa47_w21 GFP.TIF	2017-01-01	1	1832.6	7867	818.217	349.874	112.834	0.808	1.479	0.676	0.924	2.23974
13072017_20X_LDandApo_HeLa49_w21 GFP.TIF	2017-01-01	1	1745.57	8051	837.354	413.391	133.319	0.592	2.528	0.396	0.876	2.08463
13072017_20X_LDandApo_HeLa51_w21 GFP.TIF	2017-01-01	1	1842.99	6490	675.001	357.084	115.16	0.64	1.99	0.502	0.878	2.73036
13072017_20X_LDandApo_HeLa51_w21 GFP.TIF	2017-01-02	2	3316.61	15286	1589.84	477.351	153.946	0.843	1.623	0.616	0.975	2.08613
13072017_20X_LDandApo_HeLa51_w21 GFP.TIF	2017-01-03	3	2274.09	13758	1430.92	516.896	166.699	0.647	1.607	0.622	0.879	1.58926
13072017_20X_LDandApo_HeLa51_w21 GFP.TIF	2017-01-04	4	2756.64	13965	1452.45	452.277	145.859	0.858	1.319	0.758	0.979	1.89793
13072017_20X_LDandApo_HeLa53_w21 GFP.TIF	2017-01-01	1	2511.4	9776	1016.77	391.953	126.405	0.8	1.199	0.834	0.956	2.46999
13072017_20X_LDandApo_HeLa53_w21 GFP.TIF	2017-01-02	2	1663.87	11816	1228.94	429.773	138.602	0.804	1.123	0.891	0.933	1.35391
13072017_20X_LDandApo_HeLa53_w21 GFP.TIF	2017-01-03	3	1400.49	10385	1080.1	408.627	131.782	0.782	1.408	0.71	0.931	1.29662
13072017_20X_LDandApo_HeLa53_w21 GFP.TIF	2017-01-04	4	1535.48	15293	1590.57	479.127	154.518	0.837	1.323	0.756	0.973	0.965365
13072017_20X_LDandApo_HeLa55_w21 GFP.TIF	2017-01-01	1	1997.37	7854	816.865	355.479	114.642	0.781	1.188	0.841	0.94	2.44516
13072017_20X_LDandApo_HeLa55_w21 GFP.TIF	2017-01-02	2	2630.55	10504	1092.48	431.395	139.125	0.709	1.281	0.781	0.879	2.40787
13072017_20X_LDandApo_HeLa55_w21 GFP.TIF	2017-01-03	3	3019.47	16136	1678.24	504.605	162.735	0.796	1.128	0.886	0.936	1.79918
13072017_20X_LDandApo_HeLa55_w21 GFP.TIF	2017-01-04	4	2210.6	3617	376.191	249.691	80.5253	0.729	1.544	0.648	0.935	5.87627
13072017_20X_LDandApo_HeLa57_w21 GFP.TIF	2017-01-01	1	2202.75	11314	1176.73	401.773	129.572	0.881	1.177	0.849	0.967	1.87193
13072017_20X_LDandApo_HeLa57_w21 GFP.TIF	2017-01-02	2	3562.76	16688	1735.66	515.269	166.174	0.79	1.171	0.854	0.934	2.05269
13072017_20X_LDandApo_HeLa57_w21 GFP.TIF	2017-01-03	3	1603.08	12354	1284.89	460.504	148.513	0.732	1.09	0.917	0.901	1.24763
20X_LD.Apo_HeLa_w21 GFP.TIF	2017-01-01	1	3212.76	9085	944.897	403.689	130.19	0.701	2.09	0.478	0.942	3.40011
20X_LD.Apo_HeLa_w21 GFP.TIF	2017-01-02	2	3404.29	8423	876.045	378.875	122.187	0.737	1.171	0.854	0.964	3.88598
20X_LD.Apo_HeLa2_w21 GFP.TIF	2017-01-01	1	1797.07	6732	700.17	321.597	103.715	0.818	1.318	0.759	0.962	2.56662
20X_LD.Apo_HeLa2_w21 GFP.TIF	2017-01-02	2	2623.89	13531	1407.31	479.75	154.719	0.739	1.298	0.771	0.917	1.86448
20X_LD.Apo_HeLa2_w21 GFP.TIF	2017-01-03	3	2978.97	12326	1281.98	452.582	145.958	0.756	1.341	0.746	0.93	2.32373
20X_LD.Apo_HeLa2_w21 GFP.TIF	2017-01-04	4	1738.11	6796	706.826	321.934	103.824	0.824	1.877	0.533	0.984	2.45904
20X_LD.Apo_HeLa2_w21 GFP.TIF	2017-01-05	5	1989.95	10577	1100.07	401.828	129.59	0.823	1.171	0.854	0.931	1.80893
20X_LD.Apo_HeLa4_w21 GFP.TIF	2017-01-01	1	1938.77	10470	1088.95	412.923	133.168	0.772	1.586	0.63	0.96	1.78041
20X_LD.Apo_HeLa4_w21 GFP.TIF	2017-01-02	2	3067.52	8342	867.62	375.809	121.198	0.742	1.777	0.563	0.947	3.53556
20X_LD.Apo_HeLa4_w21 GFP.TIF	2017-01-03	3	1982.88	5830	606.356	324.373	104.61	0.696	1.882	0.531	0.922	3.27016
20X_LD.Apo_HeLa4_w21 GFP.TIF	2017-01-05	5	2487.9	2167	225.382	175.516	56.6039	0.884	1.142	0.875	0.985	11.0386
20X_LD.Apo_HeLa6_w21 GFP.TIF	2017-01-01	1	1782.52	4667	485.397	260.599	84.0432	0.864	1.535	0.652	0.998	3.67229
20X_LD.Apo_HeLa6_w21 GFP.TIF	2017-01-02	2	2009.44	5473	569.226	311.305	100.396	0.71	1.417	0.706	0.927	3.53013
20X_LD.Apo_HeLa6_w21 GFP.TIF	2017-01-03	3	2615.31	8274	860.548	389.177	125.51	0.686	1.672	0.598	0.86	3.03912
20X_LD.Apo_HeLa6_w21 GFP.TIF	2017-01-04	4	3392.34	10729	1115.88	397.928	128.332	0.851	1.384	0.723	0.968	3.04005
20X_LD.Apo_HeLa8_w21 GFP.TIF	2017-01-01	1	1910.81	1895	197.092	170.754	55.0682	0.817	1.239	0.807	0.959	9.69503
20X_LD.Apo_HeLa8_w21 GFP.TIF	2017-01-03	3	2248.02	7492	779.215	360.489	116.258	0.724	1.876	0.533	0.925	2.88498
20X_LD.Apo_HeLa8_w21 GFP.TIF	2017-01-04	4	1911	9912	1030.91	411.114	132.584	0.737	1.417	0.706	0.935	1.8537
20X_LD.Apo_HeLa8_w21 GFP.TIF	2017-01-05	5	1771.02	5823	605.628	309.368	99.7712	0.765	1.574	0.635	0.904	2.92426
20X_LD.Apo_HeLa8_w21 GFP.TIF	2017-01-06	6	2920.16	8838	919.207	433.954	139.95	0.59	1.88	0.532	0.839	3.17682
20X_LD.Apo_HeLa10_w21 GFP.TIF	2017-01-01	1	2775.96	7522	782.335	330.275	106.514	0.867	1.268	0.788	0.962	3.5483
20X_LD.Apo_HeLa10_w21 GFP.TIF	2017-01-02	2	2045.46	13165	1369.24	482.334	155.553	0.711	1.786	0.56	0.944	1.49386
20X_LD.Apo_HeLa10_w21 GFP.TIF	2017-01-03	3	2156.12	4272	444.315	268.233	86.5051	0.746	1.312	0.762	0.92	4.85269
20X_LD.Apo_HeLa10_w21 GFP.TIF	2017-01-04	4	2035.42	6972	725.132	339.115	109.365	0.762	1.382	0.724	0.911	2.80696
20X_LD.Apo_HeLa10_w21 GFP.TIF	2017-01-07	7	2313.1	10071	1047.45	374.966	120.927	0.9	1.295	0.772	0.976	2.20832
20X_LD.Apo_HeLa10_w21 GFP.TIF	2017-01-08	8	2110.25	10470	1088.95	395.932	127.688	0.839	1.121	0.892	0.947	1.93789
20X_LD.Apo_HeLa10_w21 GFP.TIF	2017-01-09	9	2468.63	18197	1892.6	599.035	193.189	0.637	1.388	0.721	0.879	1.30436
20X_LD.Apo_HeLa12_w21 GFP.TIF	2017-01-01	1	2197.02	4692	487.997	274.964	88.6759	0.78	2.08	0.481	0.986	4.50212
20X_LD.Apo_HeLa12_w21 GFP.TIF	2017-01-02	2	2204.69	10538	1096.02	404.66	130.503	0.809	1.118	0.894	0.948	2.01154
20X_LD.Apo_HeLa12_w21 GFP.TIF	2017-01-03	3	2462.45	6762	703.29	356.603	115.004	0.668	1.714	0.583	0.947	3.50133
20X_LD.Apo_HeLa12_w21 GFP.TIF	2017-01-04	4	2228.21	5936	617.381	308.321	99.4335	0.785	2.125	0.471	0.995	3.60913
20X_LD.Apo_HeLa12_w21 GFP.TIF	2017-01-05	5	2028.51	7933	825.082	374.335	120.723	0.711	2.242	0.446	0.966	2.45856
20X_LD.Apo_HeLa12_w21 GFP.TIF	2017-01-06	6	2090.02	7624	792.944	370.935	119.627	0.696	1.461	0.684	0.913	2.63578
20X_LD.Apo_HeLa14-1_w21 GFP.tif	2017-01-01	1	2908.08	11071	1151.45	404.035	130.301	0.852	1.144	0.874	0.942	2.52557
20X_LD.Apo_HeLa16_w21 GFP.TIF	2017-01-01	1	1838.25	9441	981.923	370.396	119.453	0.865	1.377	0.726	0.965	1.87209
20X_LD.Apo_HeLa16_w21 GFP.TIF	2017-01-02	2	3930.55	16947	1762.59	505.584	163.051	0.833	1.335	0.749	0.95	2.22998
20X_LD.Apo_HeLa16_w21 GFP.TIF	2017-01-03	3	1964.93	4019	418.001	239.392	77.2039	0.881	1.399	0.715	0.977	4.70078
20X_LD.Apo_HeLa16_w21 GFP.TIF	2017-01-04	4	1783.54	7712	802.096	348.16	112.282	0.799	1.227	0.815	0.935	2.22359
20X_LD.Apo_HeLa16_w21 GFP.TIF	2017-01-07	7	2103.38	9929	1032.68	448.665	144.694	0.62	1.93	0.518	0.909	2.03682
20X_LD.Apo_HeLa16_w21 GFP.TIF	2017-01-08	8	3181.74	14760	1535.13	456.868	147.34	0.889	1.075	0.93	0.979	2.07261
20X_LD.Apo_HeLa18_w21 GFP.TIF	2017-01-02	2	3544.89	17486	1818.65	580.036	187.062	0.653	1.259	0.795	0.869	1.94919
20X_LD.Apo_HeLa18_w21 GFP.TIF	2017-01-04	4	2741.78	2532	263.344	183.283	59.1088	0.947	1.233	0.811	1.001	10.4114
20X_LD.Apo_HeLa20-1_w21 GFP.tif	2017-01-01	1	1316.88	16695	1736.38	526.062	169.655	0.758	1.229	0.813	0.906	0.758403
20X_LD.Apo_HeLa20-1_w21 GFP.tif	2017-01-02	2	2165.63	5943	618.109	292.254	94.2519	0.874	1.287	0.777	0.971	3.50364
20X_LD.Apo_HeLa20-1_w21 GFP.tif	2017-01-03	3	1797.18	7936	825.394	380.275	122.639	0.69	1.461	0.684	0.918	2.17736
20X_LD.Apo_HeLa20-1_w21 GFP.tif	2017-01-04	4	2083.08	7858	817.281	362.864	117.024	0.75	1.274	0.785	0.931	2.54879
20X_LD.Apo_HeLa22_w21 GFP.TIF	2017-01-02	2	1956.25	6243	649.311	323.087	104.196	0.752	1.282	0.78	0.941	3.01282
20X_LD.Apo_HeLa22_w21 GFP.TIF	2017-01-03	3	3300.52	11703	1217.19	405.752	130.855	0.893	1.223	0.818	0.965	2.7116
20X_LD.Apo_HeLa22_w21 GFP.TIF	2017-01-04	4	2038.32	15672	1629.99	560.384	180.724	0.627	1.415	0.707	0.861	1.25051
20X_LD.Apo_HeLa22_w21 GFP.TIF	2017-01-06	6	1994.27	9263	963.41	360.977	116.415	0.893	1.376	0.727	0.974	2.07001
20X_LD.Apo_HeLa22_w21 GFP.TIF	2017-01-07	7	2748.19	1629	169.426	145.662	46.976	0.965	1.109	0.902	0.996	16.2206
20X_LD.Apo_HeLa24_w21 GFP.TIF	2017-01-02	2	1767.72	8485	882.493	363.391	117.194	0.807	1.121	0.892	0.938	2.0031
20X_LD.Apo_HeLa24_w21 GFP.TIF	2017-01-03	3	2422.26	8664	901.11	389.534	125.625	0.718	1.413	0.708	0.9	2.68808
20X_LD.Apo_HeLa24_w21 GFP.TIF	2017-01-05	5	2327.39	9657	1004.39	387.142	124.853	0.81	1.053	0.95	0.944	2.31722
20X_LD.Apo_HeLa24_w21 GFP.TIF	2017-01-06	6	2001.28	4243	441.299	250.457	80.7724	0.85	1.407	0.711	0.965	4.53499
20X_LD.Apo_HeLa24_w21 GFP.TIF	2017-01-07	7	3031.21	9634	1002	384.712	124.07	0.818	1.097	0.911	0.945	3.02517
20X_LD.Apo_HeLa26_w21 GFP.TIF	2017-01-02	2	1854.24	6318	657.111	368.248	118.76	0.585	1.35	0.741	0.835	2.8218
20X_LD.Apo_HeLa26_w21 GFP.TIF	2017-01-03	3	2933.66	11368	1182.34	399.011	128.681	0.897	1.215	0.823	0.977	2.48123
20X_LD.Apo_HeLa26_w21 GFP.TIF	2017-01-04	4	1808.86	15709	1633.83	564.05	181.906	0.62	1.351	0.74	0.852	1.10713
20X_LD.Apo_HeLa26_w21 GFP.TIF	2017-01-05	5	2248.75	17646	1835.29	509.541	164.327	0.854	1.223	0.818	0.955	1.22528
20X_LD.Apo_HeLa26_w21 GFP.TIF	2017-01-06	6	1926.34	9159	952.593	355.231	114.562	0.912	1.317	0.759	0.987	2.0222
20X_LD.Apo_HeLa29-1_w21 GFP.tif	2017-01-01	1	2520.2	12364	1285.93	421.243	135.851	0.876	1.14	0.877	0.972	1.95982
20X_LD.Apo_HeLa29-1_w21 GFP.tif	2017-01-02	2	2854.01	4851	504.534	265.663	85.6763	0.864	1.33	0.752	0.992	5.65671
20X_LD.Apo_HeLa29-1_w21 GFP.tif	2017-01-03	3	1674.53	16033	1667.53	490.986	158.343	0.836	1.194	0.838	0.955	1.0042
20X_LD.Apo_HeLa31_w21 GFP.TIF	2017-01-01	1	2161.59	4542	472.396	252.265	81.3555	0.897	1.384	0.723	0.995	4.5758
20X_LD.Apo_HeLa31_w21 GFP.TIF	2017-01-03	3	2226.76	8116	844.115	354.788	114.419	0.81	1.147	0.872	0.944	2.63798
20X_LD.Apo_HeLa33_w21 GFP.TIF	2017-01-03	3	2676.74	13668	1421.56	459.692	148.251	0.813	1.137	0.879	0.939	1.88296
20X_LD.Apo_HeLa33_w21 GFP.TIF	2017-01-05	5	2548.39	11541	1200.34	463.326	149.423	0.676	1.428	0.7	0.887	2.12306
20X_LD.Apo_HeLa35_w21 GFP.TIF	2017-01-01	1	3035.66	13617	1416.25	454.862	146.693	0.827	1.409	0.71	0.972	2.14345
20X_LD.Apo_HeLa35_w21 GFP.TIF	2017-01-02	2	2004.11	8746	909.639	445.671	143.729	0.553	2.731	0.366	0.864	2.2032
20X_LD.Apo_HeLa35_w21 GFP.TIF	2017-01-03	3	2607.35	7657	796.376	410.965	132.536	0.57	1.301	0.768	0.808	3.27402
20X_LD.Apo_HeLa35_w21 GFP.TIF	2017-01-04	4	2678.39	5016	521.695	270.659	87.2875	0.86	1.107	0.903	0.956	5.13402
20X_LD.Apo_HeLa37_w21 GFP.TIF	2017-01-01	1	1701.48	7582	788.575	349.702	112.779	0.779	1.355	0.738	0.95	2.15767
20X_LD.Apo_HeLa37_w21 GFP.TIF	2017-01-03	3	2676.31	24442	2542.12	611.669	197.263	0.821	1.339	0.747	0.955	1.05279
20X_LD.Apo_HeLa37_w21 GFP.TIF	2017-01-06	6	2692.99	9709	1009.8	360.664	116.314	0.938	1.092	0.916	0.989	2.66686

## Sheet: Sheet2
Perim (um)	V/A	logPerim	log(V/A)
121.325	3.35317	2.08395	0.525455
114.024	2.33268	2.057	0.367855
103.198	2.59611	2.01367	0.414324
104.436	2.40371	2.01885	0.380882
144.361	2.14699	2.15945	0.33183
118.122	2.26488	2.07233	0.355044
130.801	2.16752	2.11661	0.335963
130.934	3.04915	2.11705	0.484179
126.038	2.24615	2.1005	0.351438
132.071	2.41381	2.12081	0.382703
153.297	1.77209	2.18553	0.248486
109.353	2.60712	2.03883	0.416161
140.486	1.90398	2.14763	0.279663
158.085	2.78613	2.19889	0.445001
149.799	1.97824	2.17551	0.296279
48.7984	17.1636	1.68841	1.23461
47.0205	14.2598	1.67229	1.15411
153.075	2.43584	2.1849	0.386649
118.333	2.7649	2.07311	0.44168
137.074	2.63827	2.13696	0.42132
99.8328	3.37788	1.99927	0.528644
136.139	2.59546	2.13398	0.414214
151.289	0.858816	2.17981	-0.0660997
108.427	1.73252	2.03514	0.238678
158.159	0.877264	2.1991	-0.0568696
173.109	1.93923	2.23832	0.287629
120.825	2.4115	2.08216	0.382287
142.006	1.74034	2.15231	0.240635
130.306	2.48009	2.11496	0.394467
83.9613	4.57089	1.92408	0.660001
100.365	3.00883	2.00158	0.478398
91.5684	3.02651	1.96175	0.480943
101.495	3.24699	2.00644	0.511481
115.172	2.50751	2.06135	0.399242
138.527	1.60661	2.14153	0.20591
99.1929	3.091	1.99648	0.4901
187.584	1.29471	2.2732	0.112172
107.298	2.94233	2.03059	0.468691
105.521	3.10315	2.02334	0.491802
122.508	2.30376	2.08816	0.362437
184.798	2.33479	2.2667	0.368248
164.049	2.04257	2.21497	0.310178
118.724	2.6269	2.07454	0.419444
129.051	2.65467	2.11076	0.42401
147.304	1.09944	2.16821	0.04117
107.507	3.05405	2.03144	0.484876
181.015	1.68511	2.25772	0.226628
144.623	2.17975	2.16024	0.338406
145.201	2.36676	2.16197	0.374154
107.292	1.95993	2.03057	0.29224
174.219	1.4707	2.2411	0.167525
158.019	2.02986	2.19871	0.307466
123.249	4.51756	2.09078	0.654904
129.833	2.47451	2.11339	0.393489
128.584	2.31425	2.10919	0.36441
147.907	1.96882	2.16999	0.294205
126.835	2.41852	2.10324	0.38355
61.9871	14.8242	1.7923	1.17097
106.898	3.2012	2.02897	0.505313
112.834	2.23974	2.05244	0.350198
133.319	2.08463	2.12489	0.319029
115.16	2.73036	2.0613	0.43622
153.946	2.08613	2.18737	0.319341
166.699	1.58926	2.22193	0.201194
145.859	1.89793	2.16393	0.27828
126.405	2.46999	2.10176	0.392696
138.602	1.35391	2.14177	0.131589
131.782	1.29662	2.11986	0.112813
154.518	0.965365	2.18898	-0.0153085
114.642	2.44516	2.05934	0.388307
139.125	2.40787	2.1434	0.381633
162.735	1.79918	2.21148	0.255075
80.5253	5.87627	1.90593	0.769102
129.572	1.87193	2.11251	0.272289
166.174	2.05269	2.22056	0.312322
148.513	1.24763	2.17176	0.0960875
130.19	3.40011	2.11458	0.531493
122.187	3.88598	2.08703	0.5895
103.715	2.56662	2.01584	0.409361
154.719	1.86448	2.18954	0.270557
145.958	2.32373	2.16423	0.366185
103.824	2.45904	2.0163	0.390765
129.59	1.80893	2.11257	0.257421
133.168	1.78041	2.1244	0.250521
121.198	3.53556	2.0835	0.548458
104.61	3.27016	2.01957	0.514569
56.6039	11.0386	1.75285	1.04291
84.0432	3.67229	1.9245	0.564937
100.396	3.53013	2.00172	0.547791
125.51	3.03912	2.09868	0.482748
128.332	3.04005	2.10833	0.482881
55.0682	9.69503	1.7409	0.986549
116.258	2.88498	2.06542	0.460143
132.584	1.8537	2.12249	0.26804
99.7712	2.92426	1.99901	0.466016
139.95	3.17682	2.14597	0.501993
106.514	3.5483	2.02741	0.550021
155.553	1.49386	2.19188	0.17431
86.5051	4.85269	1.93704	0.685983
109.365	2.80696	2.03888	0.448236
120.927	2.20832	2.08252	0.344062
127.688	1.93789	2.10615	0.287329
193.189	1.30436	2.28598	0.115396
88.6759	4.50212	1.94781	0.653417
130.503	2.01154	2.11562	0.303529
115.004	3.50133	2.06071	0.544234
99.4335	3.60913	1.99753	0.557403
120.723	2.45856	2.08179	0.390681
119.627	2.63578	2.07783	0.420909
130.301	2.52557	2.11495	0.40236
119.453	1.87209	2.0772	0.272327
163.051	2.22998	2.21232	0.348301
77.2039	4.70078	1.88764	0.67217
112.282	2.22359	2.05031	0.347055
144.694	2.03682	2.16045	0.308953
147.34	2.07261	2.16832	0.316519
187.062	1.94919	2.27198	0.289853
59.1088	10.4114	1.77165	1.01751
169.655	0.758403	2.22957	-0.1201
94.2519	3.50364	1.97429	0.54452
122.639	2.17736	2.08863	0.337931
117.024	2.54879	2.06827	0.406334
104.196	3.01282	2.01785	0.478972
130.855	2.7116	2.11679	0.433226
180.724	1.25051	2.25702	0.0970881
116.415	2.07001	2.06601	0.315972
46.976	16.2206	1.67188	1.21007
117.194	2.0031	2.0689	0.301703
125.625	2.68808	2.09908	0.429442
124.853	2.31722	2.0964	0.364967
80.7724	4.53499	1.90726	0.656576
124.07	3.02517	2.09367	0.48075
118.76	2.8218	2.07467	0.450526
128.681	2.48123	2.10951	0.394666
181.906	1.10713	2.25985	0.0441968
164.327	1.22528	2.21571	0.0882355
114.562	2.0222	2.05904	0.305825
135.851	1.95982	2.13306	0.292216
85.6763	5.65671	1.93286	0.752564
158.343	1.0042	2.1996	0.00181887
81.3555	4.5758	1.91039	0.660467
114.419	2.63798	2.0585	0.421271
148.251	1.88296	2.171	0.274842
149.423	2.12306	2.17442	0.326963
146.693	2.14345	2.16641	0.331113
143.729	2.2032	2.15754	0.343053
132.536	3.27402	2.12233	0.515082
87.2875	5.13402	1.94095	0.710457
112.779	2.15767	2.05223	0.333985
197.263	1.05279	2.29505	0.0223406
116.314	2.66686	2.06563	0.426
