# Supplementary material for: A mechano-osmotic feedback couples cell volume to the rate of cell deformation
Source: eLife journal article supplement (doi:10.7554/elife.72381), 2022-04-13
Supplement: supp [file population_4h.xlsx]

## Sheet: Sheet1
2017	V (µm3)	A (µm2)	p (µm)		20200806	V (µm3)	A (µm2)	p (µm)		20200818	V (µm3)	A (µm2)	p (µm)
151	3290.11	981.195	121.325		78	3399.39	1115.57	141.032		57	4156.08	1341.79	183.469
0.349839	1959.34	839.954	114.024		0.225497	2299.09	662.208	128.01		0.399818	2711.1	775.263	126.679
	1910.6	735.948	103.198			2434.15	1125.76	138.936			2356.52	368.598	85.908
	1560.51	649.207	104.436			2225.62	987.019	138.098			3228.43	227.566	58.168
	3078.87	1434.04	144.361			2405.47	842.763	115.816			3506.69	786.911	114.227
	2163.86	955.401	118.122			3580.95	1709.76	193.806			2194.46	439.842	78.657
	2496.92	1151.97	130.801			3675.24	1063.78	147.405			2931.01	285.809	62.183
	3192.24	1046.93	130.934			3981.63	28.81	19.962			2485.22	546.761	106.889
	2472.1	1100.59	126.038			1836.28	606.564	107.118			3361.8	1041.21	130.145
	2602.4	1078.13	132.071			2354.91	677.185	119.634			1875.04	572.138	114.26
	3086.62	1741.79	153.297			2841.8	807.921	128.874			2826.23	700.482	117.52
	1398.36	536.36	109.353			3015.93	895.702	136.273			2731.78	570.578	102.387
	2734.74	1436.33	140.486			2811.34	808.129	134.084			2828.05	888.317	141.661
	4671.17	1676.58	158.085			3718.73	1095.29	133.856			3101.55	769.542	140.001
	3069.57	1551.67	149.799			3067.08	715.043	128.021			2609.17	513.999	98.948
	3006.15	175.147	48.7984			2210.73	1118.8	142.22			3864.54	1138.35	157.78
	2218.73	155.593	47.0205			3157.95	1015.62	142.728			3892.7	653.887	98.403
	4070.2	1670.96	153.075			1489.31	330.636	83.54			3467	517.223	88.855
	2597.88	939.592	118.333			1855.09	932.208	142.08			2116.16	724.508	115.669
	2895.98	1097.68	137.074			2735.51	1222.07	172.658			3020.13	908.287	127.39
	2329.96	689.769	99.8328			3288.18	1122.23	141.773			3077.27	1025.19	126.809
	3253.1	1253.38	136.139			2045.19	642.239	104.382			3405.45	1092.17	149.845
	987.904	1150.31	151.289			2662.96	871.988	130.241			2913.49	627.054	107.621
	1427.85	824.146	108.427			1700	733.868	139.883			2437.08	905.478	146.75
	1463.41	1668.16	158.159			1857.79	929.816	121.857			2659.22	675.001	98.852
	3956.99	2040.5	173.109			3098.58	1176.83	160.184			2995.24	261.368	61.264
	2185.57	906.31	120.825			2404.49	883.741	117.563			2328.57	532.304	95.487
	2486.31	1428.63	142.006			2652.44	760.806	147.508			2351.69	997.42	140.956
	2669.47	1076.36	130.306			2453.78	406.768	85.289			4672.88	174.314	50.063
	2259.11	494.238	83.9613			2315.18	988.267	123.971			3457.93	799.704	124.29
	2146.13	713.275	100.365			2965.09	737.716	121.211			3883.36	1041.93	145.897
	1802.09	595.436	91.5684			2629.69	907.247	119.676			4397.51	1569.04	167.079
	2225.15	685.297	101.495			2375.2	1042.97	135.155			3498.93	878.645	128.625
	2068.38	824.874	115.172			3584.3	1704.87	178.489			3228.84	763.822	123.691
	1285.15	799.912	138.527			2799.8	1292.07	155.507			1922.91	169.842	51.435
	1992.24	644.527	99.1929			3385.97	1163.52	145.527			2077.85	467.612	86.327
	2536.82	1959.37	187.584			2917.25	912.551	120.066			4430.03	1562.49	181.51
	2432.86	826.85	107.298			2795.61	1303.2	147.01			2970.2	943.753	120.221
	2139.17	689.353	105.521			2291.43	794.296	135.213			3083.63	771.83	106.326
	1953.02	847.755	122.508			2371.18	910.055	128.272			3874.44	1260.45	143.412
	4655.1	1993.8	184.798			2766.33	946.561	117.125			3310.18	557.578	98.571
	3021.33	1479.18	164.049			4786.71	63.236	29.585			2793.59	943.129	126.401
	2414.12	918.999	118.724			2445.03	950.409	141.152			3097.56	630.59	106.071
	3102.28	1168.61	129.051			2392.29	1318.59	193.878			3614.16	950.305	131.672
	1652.67	1503.2	147.304			2118.96	980.363	139.669			3852.01	1030.18	132.47
	1939.51	635.062	107.507			2333.73	648.063	130.386			2491.74	941.777	131.455
	3196.25	1896.76	181.015			1952.53	393.04	102.859			4815.57	909.743	122.867
	2944.47	1350.83	144.623			2957.43	1229.56	141.934			3655.56	646.815	107.891
	2645.7	1117.86	145.201			3319.93	1161.44	156.496			1784.7	501.622	91.015
	1516.6	773.807	107.292			2831.02	1129.3	142.73			2716.95	876.357	114.73
	2220.86	1510.07	174.219			2410.84	1044.02	138.139			1729.27	727.836	109.641
	3009.28	1482.51	158.019			1720.08	559.97	124.692			2554.76	896.846	123.666
	4533.16	1003.45	123.249			2942.35	1775.6	172.438			1905.36	1025.81	129.811
	3030.72	1224.78	129.833			2913.96	1066.38	142.213			2268.42	600.948	90.935
	2633.22	1137.83	128.584			2420.55	877.397	158.359			2072.85	940.112	130.732
	3024.85	1536.38	147.907			2556.52	921.079	138.331			2018.17	761.638	118.248
	2510.89	1038.19	126.835			3120.29	1158.21	147.578			1804.13	711.403	137.828
	4401.88	296.938	61.9871			2615.59	1137.52	149.383
	2181.79	681.553	106.898			2935.55	1054.73	142.161
	1832.6	818.217	112.834			2863.29	1155.72	158.85
	1745.57	837.354	133.319			2110.11	1124.83	169.773
	1842.99	675.001	115.16			2537.87	917.231	132.433
	3316.61	1589.84	153.946			2443.14	1046.41	157.774
	2274.09	1430.92	166.699			2970.85	1466.49	166.764
	2756.64	1452.45	145.859			2788.42	907.663	123.052
	2511.4	1016.77	126.405			2720.13	1093.11	134.456
	1663.87	1228.94	138.602			2055.31	1140.85	159.341
	1400.49	1080.1	131.782			2673.22	1101.11	129.986
	1535.48	1590.57	154.518			3323.85	1252.13	147.747
	1997.37	816.865	114.642			3015.63	1559.05	165.822
	2630.55	1092.48	139.125			2480.96	979.427	144.182
	3019.47	1678.24	162.735			1744.31	579.003	130.201
	2210.6	376.191	80.5253			2649.86	1093.11	142.095
	2202.75	1176.73	129.572			3069.14	1248.08	136.475
	3562.76	1735.66	166.174			3604.38	1265.34	142.411
	1603.08	1284.89	148.513			2498.63	972.562	124.72
	3212.76	944.897	130.19			2119.11	641.823	121.539
	3404.29	876.045	122.187			1653.38	1057.43	163.913
	1797.07	700.17	103.715
	2623.89	1407.31	154.719
	2978.97	1281.98	145.958
	1738.11	706.826	103.824
	1989.95	1100.07	129.59
	1938.77	1088.95	133.168
	3067.52	867.62	121.198
	1982.88	606.356	104.61
	2487.9	225.382	56.6039
	1782.52	485.397	84.0432
	2009.44	569.226	100.396
	2615.31	860.548	125.51
	3392.34	1115.88	128.332
	1910.81	197.092	55.0682
	2248.02	779.215	116.258
	1911	1030.91	132.584
	1771.02	605.628	99.7712
	2920.16	919.207	139.95
	2775.96	782.335	106.514
	2045.46	1369.24	155.553
	2156.12	444.315	86.5051
	2035.42	725.132	109.365
	2313.1	1047.45	120.927
	2110.25	1088.95	127.688
	2468.63	1892.6	193.189
	2197.02	487.997	88.6759
	2204.69	1096.02	130.503
	2462.45	703.29	115.004
	2228.21	617.381	99.4335
	2028.51	825.082	120.723
	2090.02	792.944	119.627
	2908.08	1151.45	130.301
	1838.25	981.923	119.453
	3930.55	1762.59	163.051
	1964.93	418.001	77.2039
	1783.54	802.096	112.282
	2103.38	1032.68	144.694
	3181.74	1535.13	147.34
	3544.89	1818.65	187.062
	2741.78	263.344	59.1088
	1316.88	1736.38	169.655
	2165.63	618.109	94.2519
	1797.18	825.394	122.639
	2083.08	817.281	117.024
	1956.25	649.311	104.196
	3300.52	1217.19	130.855
	2038.32	1629.99	180.724
	1994.27	963.41	116.415
	2748.19	169.426	46.976
	1767.72	882.493	117.194
	2422.26	901.11	125.625
	2327.39	1004.39	124.853
	2001.28	441.299	80.7724
	3031.21	1002	124.07
	1854.24	657.111	118.76
	2933.66	1182.34	128.681
	1808.86	1633.83	181.906
	2248.75	1835.29	164.327
	1926.34	952.593	114.562
	2520.2	1285.93	135.851
	2854.01	504.534	85.6763
	1674.53	1667.53	158.343
	2161.59	472.396	81.3555
	2226.76	844.115	114.419
	2676.74	1421.56	148.251
	2548.39	1200.34	149.423
	3035.66	1416.25	146.693
	2004.11	909.639	143.729
	2607.35	796.376	132.536
	2678.39	521.695	87.2875
	1701.48	788.575	112.779
	2676.31	2542.12	197.263
	2692.99	1009.8	116.314

## Sheet: Sheet2
V (µm3)	A (µm2)		0.230489
3290.11	981.195
1959.34	839.954
1910.6	735.948
1560.51	649.207
3078.87	1434.04
2163.86	955.401
2496.92	1151.97
3192.24	1046.93
2472.1	1100.59
2602.4	1078.13
3086.62	1741.79
1398.36	536.36
2734.74	1436.33
4671.17	1676.58
3069.57	1551.67
3006.15	175.147
2218.73	155.593
4070.2	1670.96
2597.88	939.592
2895.98	1097.68
2329.96	689.769
3253.1	1253.38
987.904	1150.31
1427.85	824.146
1463.41	1668.16
3956.99	2040.5
2185.57	906.31
2486.31	1428.63
2669.47	1076.36
2259.11	494.238
2146.13	713.275
1802.09	595.436
2225.15	685.297
2068.38	824.874
1285.15	799.912
1992.24	644.527
2536.82	1959.37
2432.86	826.85
2139.17	689.353
1953.02	847.755
4655.1	1993.8
3021.33	1479.18
2414.12	918.999
3102.28	1168.61
1652.67	1503.2
1939.51	635.062
3196.25	1896.76
2944.47	1350.83
2645.7	1117.86
1516.6	773.807
2220.86	1510.07
3009.28	1482.51
4533.16	1003.45
3030.72	1224.78
2633.22	1137.83
3024.85	1536.38
2510.89	1038.19
4401.88	296.938
2181.79	681.553
1832.6	818.217
1745.57	837.354
1842.99	675.001
3316.61	1589.84
2274.09	1430.92
2756.64	1452.45
2511.4	1016.77
1663.87	1228.94
1400.49	1080.1
1535.48	1590.57
1997.37	816.865
2630.55	1092.48
3019.47	1678.24
2210.6	376.191
2202.75	1176.73
3562.76	1735.66
1603.08	1284.89
3212.76	944.897
3404.29	876.045
1797.07	700.17
2623.89	1407.31
2978.97	1281.98
1738.11	706.826
1989.95	1100.07
1938.77	1088.95
3067.52	867.62
1982.88	606.356
2487.9	225.382
1782.52	485.397
2009.44	569.226
2615.31	860.548
3392.34	1115.88
1910.81	197.092
2248.02	779.215
1911	1030.91
1771.02	605.628
2920.16	919.207
2775.96	782.335
2045.46	1369.24
2156.12	444.315
2035.42	725.132
2313.1	1047.45
2110.25	1088.95
2468.63	1892.6
2197.02	487.997
2204.69	1096.02
2462.45	703.29
2228.21	617.381
2028.51	825.082
2090.02	792.944
2908.08	1151.45
1838.25	981.923
3930.55	1762.59
1964.93	418.001
1783.54	802.096
2103.38	1032.68
3181.74	1535.13
3544.89	1818.65
2741.78	263.344
1316.88	1736.38
2165.63	618.109
1797.18	825.394
2083.08	817.281
1956.25	649.311
3300.52	1217.19
2038.32	1629.99
1994.27	963.41
2748.19	169.426
1767.72	882.493
2422.26	901.11
2327.39	1004.39
2001.28	441.299
3031.21	1002
1854.24	657.111
2933.66	1182.34
1808.86	1633.83
2248.75	1835.29
1926.34	952.593
2520.2	1285.93
2854.01	504.534
1674.53	1667.53
2161.59	472.396
2226.76	844.115
2676.74	1421.56
2548.39	1200.34
3035.66	1416.25
2004.11	909.639
2607.35	796.376
2678.39	521.695
1701.48	788.575
2676.31	2542.12
2692.99	1009.8
3399.39	1115.57
2299.09	662.208
2434.15	1125.76
2225.62	987.019
2405.47	842.763
3580.95	1709.76
3675.24	1063.78
3981.63	28.81
1836.28	606.564
2354.91	677.185
2841.8	807.921
3015.93	895.702
2811.34	808.129
3718.73	1095.29
3067.08	715.043
2210.73	1118.8
3157.95	1015.62
1489.31	330.636
1855.09	932.208
2735.51	1222.07
3288.18	1122.23
2045.19	642.239
2662.96	871.988
1700	733.868
1857.79	929.816
3098.58	1176.83
2404.49	883.741
2652.44	760.806
2453.78	406.768
2315.18	988.267
2965.09	737.716
2629.69	907.247
2375.2	1042.97
3584.3	1704.87
2799.8	1292.07
3385.97	1163.52
2917.25	912.551
2795.61	1303.2
2291.43	794.296
2371.18	910.055
2766.33	946.561
4786.71	63.236
2445.03	950.409
2392.29	1318.59
2118.96	980.363
2333.73	648.063
1952.53	393.04
2957.43	1229.56
3319.93	1161.44
2831.02	1129.3
2410.84	1044.02
1720.08	559.97
2942.35	1775.6
2913.96	1066.38
2420.55	877.397
2556.52	921.079
3120.29	1158.21
2615.59	1137.52
2935.55	1054.73
2863.29	1155.72
2110.11	1124.83
2537.87	917.231
2443.14	1046.41
2970.85	1466.49
2788.42	907.663
2720.13	1093.11
2055.31	1140.85
2673.22	1101.11
3323.85	1252.13
3015.63	1559.05
2480.96	979.427
1744.31	579.003
2649.86	1093.11
3069.14	1248.08
3604.38	1265.34
2498.63	972.562
2119.11	641.823
1653.38	1057.43
4156.08	1341.79
2711.1	775.263
2356.52	368.598
3228.43	227.566
3506.69	786.911
2194.46	439.842
2931.01	285.809
2485.22	546.761
3361.8	1041.21
1875.04	572.138
2826.23	700.482
2731.78	570.578
2828.05	888.317
3101.55	769.542
2609.17	513.999
3864.54	1138.35
3892.7	653.887
3467	517.223
2116.16	724.508
3020.13	908.287
3077.27	1025.19
3405.45	1092.17
2913.49	627.054
2437.08	905.478
2659.22	675.001
2995.24	261.368
2328.57	532.304
2351.69	997.42
4672.88	174.314
3457.93	799.704
3883.36	1041.93
4397.51	1569.04
3498.93	878.645
3228.84	763.822
1922.91	169.842
2077.85	467.612
4430.03	1562.49
2970.2	943.753
3083.63	771.83
3874.44	1260.45
3310.18	557.578
2793.59	943.129
3097.56	630.59
3614.16	950.305
3852.01	1030.18
2491.74	941.777
4815.57	909.743
3655.56	646.815
1784.7	501.622
2716.95	876.357
1729.27	727.836
2554.76	896.846
1905.36	1025.81
2268.42	600.948
2072.85	940.112
2018.17	761.638
1804.13	711.403
