# Supplementary material for: A mechano-osmotic feedback couples cell volume to the rate of cell deformation
Source: eLife journal article supplement (doi:10.7554/elife.72381), 2022-04-13
Supplement: supp [file population_4h.xlsx]

## Sheet: all
ID	lineage	Volume (µm3)		area (µm2)	perimeter (µm)		0.609138
rpeEY57_w11 GFP.TIF	1	1741.95	rpeEY57_w2RICM.TIF	1359.88	281.761
rpeEY57_w11 GFP.TIF	2	1004.01	rpeEY57_w2RICM.TIF	1770.6	194.476
rpeEY57_w11 GFP.TIF	3	1381.03	rpeEY57_w2RICM.TIF	1988.29	198.43
rpeEY57_w11 GFP.TIF	8	3171.21	rpeEY57_w2RICM.TIF	38.794	27.731
rpeEY57_w11 GFP.TIF	10	1517.77	rpeEY57_w2RICM.TIF	1762.28	220.33
rpeEY57_w11 GFP.TIF	11	1411.98	rpeEY57_w2RICM.TIF	1490.2	169.123
rpeEY57_w11 GFP.TIF	12	1126.49	rpeEY57_w2RICM.TIF	1753.03	171.141
rpeEY57_w11 GFP.TIF	13	1455.17	rpeEY57_w2RICM.TIF	1629.57	153.253
rpeEY61_w11 GFP.TIF	1	1323.74	rpeEY61_w2RICM.TIF	1055.25	206.589
rpeEY61_w11 GFP.TIF	2	2037.81	rpeEY61_w2RICM.TIF	1756.25	182.767
rpeEY61_w11 GFP.TIF	3	1822.9	rpeEY61_w2RICM.TIF	2051.11	231.399
rpeEY61_w11 GFP.TIF	4	2028.12	rpeEY61_w2RICM.TIF	3053.1	234.296
rpeEY61_w11 GFP.TIF	5	3447.21	rpeEY61_w2RICM.TIF	2735.26	245.682
rpeEY62_w11 GFP-1.tif	1	1786.46	rpeEY62_w2RICM.TIF	2035.71	206.974
rpeEY62_w11 GFP-1.tif	2	1999.19	rpeEY62_w2RICM.TIF	2426.05	210.365
rpeEY62_w11 GFP-1.tif	3	1110.11	rpeEY62_w2RICM.TIF	846.299	126.541
rpeEY62_w11 GFP-1.tif	4	2314.54	rpeEY62_w2RICM.TIF	2439.36	216.148
rpeEY64_w11 GFP.TIF	1	1664.11	rpeEY64_w2RICM.TIF	1489.16	180.878
rpeEY64_w11 GFP.TIF	2	546.842	rpeEY64_w2RICM.TIF	154.553	50.49
rpeEY64_w11 GFP.TIF	3	2455.3	rpeEY64_w2RICM.TIF	2532.55	282.638
rpeEY64_w11 GFP.TIF	4	1831.11	rpeEY64_w2RICM.TIF	1080.52	138.604
rpeEY65_w11 GFP-1.tif	1	1951.18	rpeEY65_w2RICM.TIF	1631.96	192.632
rpeEY65_w11 GFP-1.tif	2	1490.46	rpeEY65_w2RICM.TIF	1776.95	184.202
rpeEY65_w11 GFP-1.tif	3	1897.96	rpeEY65_w2RICM.TIF	782.855	112.101
rpeEY65_w11 GFP-1.tif	4	1607.43	rpeEY65_w2RICM.TIF	1819.48	190.533
rpeEY65_w11 GFP-1.tif	5	1200.42	rpeEY65_w2RICM.TIF	1631.34	191.819
rpeEY65_w11 GFP-1.tif	6	3003.84	rpeEY65_w2RICM.TIF	3100.22	280.597
rpeEY66_w11 GFP.TIF	1	1542.16	rpeEY66_w2RICM.TIF	1953.86	182.755
rpeEY66_w11 GFP.TIF	2	1392.52	rpeEY66_w2RICM.TIF	1245.89	150.66
rpeEY66_w11 GFP.TIF	3	2920.82	rpeEY66_w2RICM.TIF	4173.77	293.082
rpeEY66_w11 GFP.TIF	4	2226.51	rpeEY66_w2RICM.TIF	3514.16	251.365
rpeEY66_w11 GFP.TIF	5	2280.79	rpeEY66_w2RICM.TIF	2358.34	209.065
rpeEY67_w11 GFP.TIF	1	1517.23	rpeEY67_w2RICM.TIF	1900.19	187.484
rpeEY67_w11 GFP.TIF	2	1364.73	rpeEY67_w2RICM.TIF	1332.11	163.681
rpeEY67_w11 GFP.TIF	3	3003.15	rpeEY67_w2RICM.TIF	3940.49	277.601
rpeEY67_w11 GFP.TIF	4	2414.37	rpeEY67_w2RICM.TIF	3760.87	255.518
rpeEY67_w11 GFP.TIF	5	1620.34	rpeEY67_w2RICM.TIF	1932.64	228.466
rpeEY67_w11 GFP.TIF	6	2361.61	rpeEY67_w2RICM.TIF	2415.55	207.605
rpeEY68_w11 GFP.TIF	1	2185.72	rpeEY68_w2RICM.TIF	1452.34	174.005
rpeEY68_w11 GFP.TIF	2	1130.79	rpeEY68_w2RICM.TIF	1268.15	149.634
rpeEY68_w11 GFP.TIF	3	2008.75	rpeEY68_w2RICM.TIF	2556.99	249.042
rpeEY68_w11 GFP.TIF	4	1147.28	rpeEY68_w2RICM.TIF	1033.82	173.596
rpeEY68_w11 GFP.TIF	5	1647.06	rpeEY68_w2RICM.TIF	1908.52	232.581
rpeEY70_w11 GFP.TIF	1	988.706	rpeEY70_w2RICM.TIF	1131.59	140.015
rpeEY70_w11 GFP.TIF	2	392.593	rpeEY70_w2RICM.TIF	145.089	44.36
rpeEY70_w11 GFP.TIF	3	1799.56	rpeEY70_w2RICM.TIF	2293.13	301.747
rpeEY70_w11 GFP.TIF	4	1607.1	rpeEY70_w2RICM.TIF	2419.5	258.505
rpeEY70_w11 GFP.TIF	5	1547.45	rpeEY70_w2RICM.TIF	1562.9	177.724
rpeEY70_w11 GFP.TIF	6	2095.46	rpeEY70_w2RICM.TIF	2521.42	205.83
rpeEY84_w11 GFP-1.tif	1	3661.04	rpeEY84_w2RICM.TIF	2703.12	258.38
rpeEY84_w11 GFP-1.tif	2	2584.86	rpeEY84_w2RICM.TIF	1060.76	165.409
rpeEY84_w11 GFP-1.tif	3	1748.13	rpeEY84_w2RICM.TIF	1661.81	195.476
rpeEY84_w11 GFP-1.tif	4	1237.25	rpeEY84_w2RICM.TIF	1739.19	182.131
rpeEY84_w11 GFP-1.tif	5	2010.93	rpeEY84_w2RICM.TIF	2659.54	226.169
rpeEY85_w11 GFP.TIF	1	3529.39	rpeEY85_w2RICM.TIF	3247.8	237.924
rpeEY85_w11 GFP.TIF	2	2238.79	rpeEY85_w2RICM.TIF	1757.08	174.329
rpeEY85_w11 GFP.TIF	3	3461.37	rpeEY85_w2RICM.TIF	2003.89	196.817
rpeEY85_w11 GFP.TIF	4	1242.31	rpeEY85_w2RICM.TIF	931.168	232.059
rpeEY85_w11 GFP.TIF	5	1597.87	rpeEY85_w2RICM.TIF	1075.84	186.797
rpeEY86_w11 GFP.TIF	1	1818.46	rpeEY86_w2RICM.TIF	1386.92	176.928
rpeEY86_w11 GFP.TIF	2	1442.34	rpeEY86_w2RICM.TIF	1836.44	215.315
rpeEY86_w11 GFP.TIF	3	1071.12	rpeEY86_w2RICM.TIF	547.489	107.517
rpeEY86_w11 GFP.TIF	4	2212.47	rpeEY86_w2RICM.TIF	840.266	130.821
rpeEY86_w11 GFP.TIF	5	1646.89	rpeEY86_w2RICM.TIF	2059.43	187.448
rpeEY86_w11 GFP.TIF	6	2113.45	rpeEY86_w2RICM.TIF	2190.27	210.036
rpeEY88_w11 GFP.TIF	1	1178.14	rpeEY88_w2RICM.TIF	2295.83	204.301
rpeEY88_w11 GFP.TIF	2	1165.97	rpeEY88_w2RICM.TIF	1230.29	138.186
rpeEY88_w11 GFP.TIF	3	1688.7	rpeEY88_w2RICM.TIF	3184.67	269.659
rpeEY88_w11 GFP.TIF	5	1412.52	rpeEY88_w2RICM.TIF	2705.41	234.884
rpeEY88_w11 GFP.TIF	6	1984.16	rpeEY88_w2RICM.TIF	2751.07	209.005
rpeEY88_w11 GFP.TIF	7	2104.13	rpeEY88_w2RICM.TIF	2240.19	209.457
rpeEY88_w11 GFP.TIF	8	1533.82	rpeEY88_w2RICM.TIF	2548.99	201.962
rpeEY88_w11 GFP.TIF	9	1463.86	rpeEY88_w2RICM.TIF	1823.44	238.763
rpeEY89_w11 GFP.TIF	1	1397.8	rpeEY89_w2RICM.TIF	2587.05	216.966
rpeEY89_w11 GFP.TIF	2	1516.29	rpeEY89_w2RICM.TIF	2041.23	278.139
rpeEY89_w11 GFP.TIF	3	2239.7	rpeEY89_w2RICM.TIF	2858.4	270.719
rpeEY89_w11 GFP.TIF	4	907.963	rpeEY89_w2RICM.TIF	443.379	136.405
rpeEY89_w11 GFP.TIF	5	1261.01	rpeEY89_w2RICM.TIF	1265.34	160.111
rpeEY89_w11 GFP.TIF	6	1310.94	rpeEY89_w2RICM.TIF	1346.78	164.336
rpeEY90_w11 GFP-1.tif	1	1408.06	rpeEY90_w2RICM.TIF	1550.94	163.975
rpeEY90_w11 GFP-1.tif	2	1421.6	rpeEY90_w2RICM.TIF	1653.7	195.831
rpeEY90_w11 GFP-1.tif	3	1158.5	rpeEY90_w2RICM.TIF	2087.3	194.142
rpeEY90_w11 GFP-1.tif	4	2277.55	rpeEY90_w2RICM.TIF	2176.85	183.307
rpeEY90_w11 GFP-1.tif	5	1397.31	rpeEY90_w2RICM.TIF	1391.81	152.697
rpeEY90_w11 GFP-1.tif	6	1483.7	rpeEY90_w2RICM.TIF	1312.35	147.548
rpeEY100_w11 GFP.TIF	1	2306.9	rpeEY100_w2RICM.TIF	2806.82	259.45
rpeEY100_w11 GFP.TIF	2	1502.85	rpeEY100_w2RICM.TIF	1979.55	207.396
rpeEY100_w11 GFP.TIF	3	1483.87	rpeEY100_w2RICM.TIF	1340.33	158.593
rpeEY100_w11 GFP.TIF	4	1813.01	rpeEY100_w2RICM.TIF	2112.57	264.791
rpeEY100_w11 GFP.TIF	5	2034.66	rpeEY100_w2RICM.TIF	1888.65	195.08
rpeEY100_w11 GFP.TIF	6	850.341	rpeEY100_w2RICM.TIF	597.1	116.294
rpeEY100_w11 GFP.TIF	7	1530.69	rpeEY100_w2RICM.TIF	2247.37	221.652
rpeEY100_w11 GFP.TIF	8	3118.2	rpeEY100_w2RICM.TIF	3482.65	327.059
rpeEY101_w11 GFP.TIF	1	1576.21	rpeEY101_w2RICM.TIF	1090.4	169.459
rpeEY101_w11 GFP.TIF	2	2628.43	rpeEY101_w2RICM.TIF	3128.72	260.268
rpeEY101_w11 GFP.TIF	3	1877.54	rpeEY101_w2RICM.TIF	3160.02	231.207
rpeEY101_w11 GFP.TIF	4	1840.69	rpeEY101_w2RICM.TIF	1890.94	214.864
rpeEY101_w11 GFP.TIF	5	1533.91	rpeEY101_w2RICM.TIF	1684.28	245.88
rpeEY101_w11 GFP.TIF	6	3149.61	rpeEY101_w2RICM.TIF	4060.3	240.157
rpeEY101_w11 GFP.TIF	7	3111.22	rpeEY101_w2RICM.TIF	2280.34	269.984
rpeEY102_w11 GFP-1.tif	1	1890.31	rpeEY102_w2RICM.TIF	2062.55	193.735
rpeEY102_w11 GFP-1.tif	2	1924.02	rpeEY102_w2RICM.TIF	2211.9	217.314
rpeEY102_w11 GFP-1.tif	3	1389.1	rpeEY102_w2RICM.TIF	1984.96	208.286
rpeEY103_w11 GFP.TIF	1	2251.79	rpeEY103_w2RICM.TIF	2223.65	235.888
rpeEY103_w11 GFP.TIF	3	1769.8	rpeEY103_w2RICM.TIF	2526.94	210.245
rpeEY103_w11 GFP.TIF	4	1496.45	rpeEY103_w2RICM.TIF	1494.26	206.341
rpeEY104_w11 GFP.TIF	1	1136.28	rpeEY104_w2RICM.TIF	799.808	164.391
rpeEY104_w11 GFP.TIF	2	1918.27	rpeEY104_w2RICM.TIF	3416.19	254.954
rpeEY104_w11 GFP.TIF	3	1101.26	rpeEY104_w2RICM.TIF	764.654	176.23
rpeEY104_w11 GFP.TIF	4	2480.52	rpeEY104_w2RICM.TIF	2537.13	290.967
rpeEY104_w11 GFP.TIF	5	1400.16	rpeEY104_w2RICM.TIF	488.621	164.352
rpeEY104_w11 GFP.TIF	6	1772.27	rpeEY104_w2RICM.TIF	3037.19	236.519
rpeEY104_w11 GFP.TIF	7	1374.93	rpeEY104_w2RICM.TIF	1274.81	161.905
rpeEY105_w11 GFP-1.tif	1	1521.41	rpeEY105_w2RICM.TIF	2480.65	236.999
rpeEY105_w11 GFP-1.tif	2	1658.96	rpeEY105_w2RICM.TIF	2189.23	213.713
rpeEY105_w11 GFP-1.tif	3	2783.07	rpeEY105_w2RICM.TIF	3763.26	336.336
rpeEY105_w11 GFP-1.tif	4	1574.03	rpeEY105_w2RICM.TIF	1631.65	162.517

## Sheet: 1
ID	lineage	Cell_Intensisty	area	perimeter
rpeEY57_w11 GFP.TIF	1	1741.95	1359.88	281.761
rpeEY57_w11 GFP.TIF	2	1004.01	1770.6	194.476
rpeEY57_w11 GFP.TIF	3	1381.03	1988.29	198.43
rpeEY57_w11 GFP.TIF	8	3171.21	38.794	27.731
rpeEY57_w11 GFP.TIF	10	1517.77	1762.28	220.33
rpeEY57_w11 GFP.TIF	11	1411.98	1490.2	169.123
rpeEY57_w11 GFP.TIF	12	1126.49	1753.03	171.141
rpeEY57_w11 GFP.TIF	13	1455.17	1629.57	153.253
rpeEY61_w11 GFP.TIF	1	1323.74	1055.25	206.589
rpeEY61_w11 GFP.TIF	2	2037.81	1756.25	182.767
rpeEY61_w11 GFP.TIF	3	1822.9	2051.11	231.399
rpeEY61_w11 GFP.TIF	4	2028.12	3053.1	234.296
rpeEY61_w11 GFP.TIF	5	3447.21	2735.26	245.682
rpeEY62_w11 GFP-1.tif	1	1786.46	2035.71	206.974
rpeEY62_w11 GFP-1.tif	2	1999.19	2426.05	210.365
rpeEY62_w11 GFP-1.tif	3	1110.11	846.299	126.541
rpeEY62_w11 GFP-1.tif	4	2314.54	2439.36	216.148
rpeEY64_w11 GFP.TIF	1	1664.11	1489.16	180.878
rpeEY64_w11 GFP.TIF	2	546.842	154.553	50.49
rpeEY64_w11 GFP.TIF	3	2455.3	2532.55	282.638
rpeEY64_w11 GFP.TIF	4	1831.11	1080.52	138.604
rpeEY65_w11 GFP-1.tif	1	1951.18	1631.96	192.632
rpeEY65_w11 GFP-1.tif	2	1490.46	1776.95	184.202
rpeEY65_w11 GFP-1.tif	3	1897.96	782.855	112.101
rpeEY65_w11 GFP-1.tif	4	1607.43	1819.48	190.533
rpeEY65_w11 GFP-1.tif	5	1200.42	1631.34	191.819
rpeEY65_w11 GFP-1.tif	6	3003.84	3100.22	280.597
rpeEY66_w11 GFP.TIF	1	1542.16	1953.86	182.755
rpeEY66_w11 GFP.TIF	2	1392.52	1245.89	150.66
rpeEY66_w11 GFP.TIF	3	2920.82	4173.77	293.082
rpeEY66_w11 GFP.TIF	4	2226.51	3514.16	251.365
rpeEY66_w11 GFP.TIF	5	2280.79	2358.34	209.065
rpeEY67_w11 GFP.TIF	1	1517.23	1900.19	187.484
rpeEY67_w11 GFP.TIF	2	1364.73	1332.11	163.681
rpeEY67_w11 GFP.TIF	3	3003.15	3940.49	277.601
rpeEY67_w11 GFP.TIF	4	2414.37	3760.87	255.518
rpeEY67_w11 GFP.TIF	5	1620.34	1932.64	228.466
rpeEY67_w11 GFP.TIF	6	2361.61	2415.55	207.605
rpeEY68_w11 GFP.TIF	1	2185.72	1452.34	174.005
rpeEY68_w11 GFP.TIF	2	1130.79	1268.15	149.634
rpeEY68_w11 GFP.TIF	3	2008.75	2556.99	249.042
rpeEY68_w11 GFP.TIF	4	1147.28	1033.82	173.596
rpeEY68_w11 GFP.TIF	5	1647.06	1908.52	232.581
rpeEY70_w11 GFP.TIF	1	988.706	1131.59	140.015
rpeEY70_w11 GFP.TIF	2	392.593	145.089	44.36
rpeEY70_w11 GFP.TIF	3	1799.56	2293.13	301.747
rpeEY70_w11 GFP.TIF	4	1607.1	2419.5	258.505
rpeEY70_w11 GFP.TIF	5	1547.45	1562.9	177.724
rpeEY70_w11 GFP.TIF	6	2095.46	2521.42	205.83

## Sheet: 2
ID	lineage	Cell_Intensisty
rpeEY84_w11 GFP-1.tif	1	3661.04	2703.12	258.38
rpeEY84_w11 GFP-1.tif	2	2584.86	1060.76	165.409
rpeEY84_w11 GFP-1.tif	3	1748.13	1661.81	195.476
rpeEY84_w11 GFP-1.tif	4	1237.25	1739.19	182.131
rpeEY84_w11 GFP-1.tif	5	2010.93	2659.54	226.169
rpeEY85_w11 GFP.TIF	1	3529.39	3247.8	237.924
rpeEY85_w11 GFP.TIF	2	2238.79	1757.08	174.329
rpeEY85_w11 GFP.TIF	3	3461.37	2003.89	196.817
rpeEY85_w11 GFP.TIF	4	1242.31	931.168	232.059
rpeEY85_w11 GFP.TIF	5	1597.87	1075.84	186.797
rpeEY86_w11 GFP.TIF	1	1818.46	1386.92	176.928
rpeEY86_w11 GFP.TIF	2	1442.34	1836.44	215.315
rpeEY86_w11 GFP.TIF	3	1071.12	547.489	107.517
rpeEY86_w11 GFP.TIF	4	2212.47	840.266	130.821
rpeEY86_w11 GFP.TIF	5	1646.89	2059.43	187.448
rpeEY86_w11 GFP.TIF	6	2113.45	2190.27	210.036
rpeEY88_w11 GFP.TIF	1	1178.14	2295.83	204.301
rpeEY88_w11 GFP.TIF	2	1165.97	1230.29	138.186
rpeEY88_w11 GFP.TIF	3	1688.7	3184.67	269.659
rpeEY88_w11 GFP.TIF	5	1412.52	2705.41	234.884
rpeEY88_w11 GFP.TIF	6	1984.16	2751.07	209.005
rpeEY88_w11 GFP.TIF	7	2104.13	2240.19	209.457
rpeEY88_w11 GFP.TIF	8	1533.82	2548.99	201.962
rpeEY88_w11 GFP.TIF	9	1463.86	1823.44	238.763
rpeEY89_w11 GFP.TIF	1	1397.8	2587.05	216.966
rpeEY89_w11 GFP.TIF	2	1516.29	2041.23	278.139
rpeEY89_w11 GFP.TIF	3	2239.7	2858.4	270.719
rpeEY89_w11 GFP.TIF	4	907.963	443.379	136.405
rpeEY89_w11 GFP.TIF	5	1261.01	1265.34	160.111
rpeEY89_w11 GFP.TIF	6	1310.94	1346.78	164.336
rpeEY90_w11 GFP-1.tif	1	1408.06	1550.94	163.975
rpeEY90_w11 GFP-1.tif	2	1421.6	1653.7	195.831
rpeEY90_w11 GFP-1.tif	3	1158.5	2087.3	194.142
rpeEY90_w11 GFP-1.tif	4	2277.55	2176.85	183.307
rpeEY90_w11 GFP-1.tif	5	1397.31	1391.81	152.697
rpeEY90_w11 GFP-1.tif	6	1483.7	1312.35	147.548

## Sheet: 3
ID	lineage	Cell_Intensisty
rpeEY100_w11 GFP.TIF	1	2306.9	2806.82	259.45
rpeEY100_w11 GFP.TIF	2	1502.85	1979.55	207.396
rpeEY100_w11 GFP.TIF	3	1483.87	1340.33	158.593
rpeEY100_w11 GFP.TIF	4	1813.01	2112.57	264.791
rpeEY100_w11 GFP.TIF	5	2034.66	1888.65	195.08
rpeEY100_w11 GFP.TIF	6	850.341	597.1	116.294
rpeEY100_w11 GFP.TIF	7	1530.69	2247.37	221.652
rpeEY100_w11 GFP.TIF	8	3118.2	3482.65	327.059
rpeEY101_w11 GFP.TIF	1	1576.21	1090.4	169.459
rpeEY101_w11 GFP.TIF	2	2628.43	3128.72	260.268
rpeEY101_w11 GFP.TIF	3	1877.54	3160.02	231.207
rpeEY101_w11 GFP.TIF	4	1840.69	1890.94	214.864
rpeEY101_w11 GFP.TIF	5	1533.91	1684.28	245.88
rpeEY101_w11 GFP.TIF	6	3149.61	4060.3	240.157
rpeEY101_w11 GFP.TIF	7	3111.22	2280.34	269.984
rpeEY102_w11 GFP-1.tif	1	1890.31	2062.55	193.735
rpeEY102_w11 GFP-1.tif	2	1924.02	2211.9	217.314
rpeEY102_w11 GFP-1.tif	3	1389.1	1984.96	208.286
rpeEY103_w11 GFP.TIF	1	2251.79	2223.65	235.888
rpeEY103_w11 GFP.TIF	3	1769.8	2526.94	210.245
rpeEY103_w11 GFP.TIF	4	1496.45	1494.26	206.341
rpeEY104_w11 GFP.TIF	1	1136.28	799.808	164.391
rpeEY104_w11 GFP.TIF	2	1918.27	3416.19	254.954
rpeEY104_w11 GFP.TIF	3	1101.26	764.654	176.23
rpeEY104_w11 GFP.TIF	4	2480.52	2537.13	290.967
rpeEY104_w11 GFP.TIF	5	1400.16	488.621	164.352
rpeEY104_w11 GFP.TIF	6	1772.27	3037.19	236.519
rpeEY104_w11 GFP.TIF	7	1374.93	1274.81	161.905
rpeEY105_w11 GFP-1.tif	1	1521.41	2480.65	236.999
rpeEY105_w11 GFP-1.tif	2	1658.96	2189.23	213.713
rpeEY105_w11 GFP-1.tif	3	2783.07	3763.26	336.336
rpeEY105_w11 GFP-1.tif	4	1574.03	1631.65	162.517
