# Supplementary material for: A mechano-osmotic feedback couples cell volume to the rate of cell deformation
Source: eLife journal article supplement (doi:10.7554/elife.72381), 2022-04-13
Supplement: supp [file population_4h.xlsx]

## Sheet: Sheet1
20181001	V (µm3)	A (µm2)	p (µm)		20200806	V (µm3)	A (µm2)	p (µm)			20181002	V (µm3)	A (µm2)	p (µm)		data
95	1188.99	940.945	204.019		74	2334.88	1655.15	190.789			53	1158.18	569.538	189.855
0.273538	2166	2494.9	230.849		0.458393	2823.22	1688.85	270.293			0.324982	1378.2	1088.01	232.375
	1303.7	1813.14	188.348			1758.18	1737.94	236.586				1216.12	467.716	171.136
	2256.6	873.236	131.664			3209.89	1097.37	235.983				1164.08	686.025	193.357
	924.352	889.149	196.768			2058.46	1587.65	197.324				1304.23	570.37	126.484
	1822.12	711.195	175.112			2412.79	2029.58	221.866				1598	851.707	234.781
	1598.65	766.942	166.413			2204.25	1433.41	246.751				1021.76	701.834	266.07
	1401.3	2057.76	215.482			1284.98	1196.38	184.279				1992.8	708.803	171.128
	1216.49	1597.85	195.075			1514.16	1518.6	201.001				1461.41	841.099	178.722
	1269.03	1968.84	215.142			2630.51	1345.63	239.816				1227.44	611.349	169.878
	2207.66	792.944	122.833			1340.3	969.754	181.028				1838.13	502.662	148.431
	1029.54	703.914	239.582			2782.28	1303.3	181.761				1044.49	230.686	65.555
	1045.74	1247.35	163.592			2304.18	1527.54	233.388				1102.81	708.283	219.082
	2464.25	1855.16	239.219			1726.45	1212.09	198.83				1775.33	509.111	122.317
	1496.97	737.716	184.976			2669.02	1940.65	263.84				1073.99	779.007	162.352
	1629.24	1134.08	221.303			1916.72	1112.04	210.879				1100.02	549.049	157.679
	3478.4	2815.66	267.671			1411.52	877.917	138.865				974.97	643.383	155.788
	1830.39	675.521	137.578			2526.82	2143.05	237.333				1231.24	524.296	141.226
	1301.09	459.396	125.649			1975.57	1735.14	217.128				733.946	357.365	83.465
	1495.35	1420.72	251.316			3005.8	1973.1	243.011				853.153	489.453	153.556
	1153.97	640.783	178.186			3324.86	2383.72	251.506				1258.18	312.123	136.114
	1074.18	645.567	123.008			2563.94	1645.07	230.853				2580.33	73.636	35.805
	1381.65	263.968	79.006			1957.54	1460.77	184.18				1628.26	682.697	158.969
	1462.23	847.651	170.815			1729.72	997.732	185.305				1779.22	1330.03	233.399
	1136.12	832.154	176.506			1226.56	869.18	148.698				1154.42	795.752	218.671
	1523.85	32.97	23.282			1756.3	765.59	212.57				1166.41	737.404	176.794
	1101.16	1284.58	180.8			2427.94	1443.19	234.517				1230.13	735.636	239.46
	1116.54	674.065	203.675			1661.23	811.457	160.185				1235.15	1224.88	181.255
	899.307	464.076	116.713			1433.95	1108.81	169.358				1174	869.388	234.85
	1175.14	1001.68	177.617			3541.98	1331.59	162.375				1164.07	775.159	189.223
	1007.66	543.641	122.003			2078.75	961.538	172.458				1565.71	567.77	227.241
	1512.13	760.91	145.611			1349.15	1235.49	209.708				1192.97	884.261	178.352
	1147.35	782.335	204.05			2714.11	720.035	114.45				918.588	607.605	158.501
	1109.83	739.069	138.211			2259.48	851.915	162.731				1481.4	749.469	192.535
	808.913	1007.4	214.371			1740.58	959.354	197.54				972.515	710.675	165.548
	1230.22	625.494	148.724			2771.18	1703.83	235.312				1286.86	920.871	242.458
	933.412	747.389	119.687			3221.03	2474.31	228.912				1612.32	789.823	150.654
	839.925	561.114	180.521			2338.97	1002.72	145.588				1400.04	665.328	155.494
	1178.19	812.497	241.323			3163.46	1891.56	266.62				938.903	322.003	111.099
	891.603	1413.44	288.297			2079.1	1166.53	199.384				1363.36	447.227	134.652
	750.804	1034.65	334.581			1527.9	559.242	153.403				1144.19	263.656	86.474
	896.643	1586.2	208.065			2903.57	525.544	150.537				1236.61	665.952	204.436
	849.109	802.72	194.694			3303.74	2111.53	304.235				2177.01	531.68	173.472
	1193.21	1305.9	190.667			2200.23	884.365	130.082				937.242	474.477	170.007
	1705.75	806.152	162.168			1804.96	841.619	152.612				2211.81	369.742	108.685
	1332.18	792.216	164.367			3421.2	1468.46	248.612				1392.52	1104.55	252.568
	1154.44	834.962	173.472			2708.37	1615.22	252.119				1118.95	1249.12	181.166
	915.151	1319.32	238.663			2132.33	1304.97	220.973				1371.83	1249.43	190.915
	1678.46	481.133	113.646			3294.85	629.238	126.138				1069.35	54.291	29.657
	1399.76	421.017	149.382			2304.33	1115.26	150.301				983.862	694.45	119.356
	1116.79	680.513	193.297			2119.65	1230.6	216.943				4424.68	1673.25	188.988
	1234.87	420.081	103.802			1708.12	1049.94	249.083				1295.42	665.016	160.728
	1052.94	626.534	201.405			2512.86	1124.52	231.103				1430.55	869.596	186.9
	2526.99	1230.71	327.657			2738.84	1656.09	227.668
	1136.88	1093.83	223.431			920.494	1045.37	206.585
	2668	1056.91	216.339			4380.41	2136.81	395.717
	1438.66	1821.05	316.78			1569.92	847.755	189.347
	1343.25	966.634	171.938			2786.13	849.627	124.49
	1206.16	719.931	129.116			1846.66	1210.74	174.719
	1593.68	1604.3	208.343			1609.83	958.21	173.198
	815.122	1825.83	189.594			1894.2	633.294	104.069
	883.827	1192.43	194.807			4836.54	1590.98	153.12
	2948.67	31.93	21.713			1686.37	1090.3	228.567
	1445.91	1392.75	191.31			1607.15	741.253	174.044
	1013.3	572.658	145.957			1837.12	1498.21	222.387
	1348.5	393.768	126.71			1985.72	1173.09	191.618
	1763.82	1451.2	166.806			1982.17	1142.09	174.093
	1574.62	538.336	150.322			3954.91	1303.41	174.634
	1863.2	709.323	123.168			3394.6	1117.13	198.779
	3257.39	1022.9	163.881			2189.71	1339.5	208.459
	1788.16	1856.2	192.462			2107.2	695.074	108.788
	764.878	128.968	45.033			2183.64	999.292	195.719
	2169.76	721.075	164.528			1760.29	1379.12	188.122
	1386.56	724.508	143.336			2922.13	1550.73	224.451
	1214.84	613.325	128.704
	1293.89	869.076	189.311
	1684.55	1765.3	197.247
	953.443	765.902	193.298
	1364.4	1439.03	175.631
	1745.9	634.23	129.882
	1172.99	436.93	102.422
	2497.18	1665.87	258.544
	1283.08	631.942	146.951
	1151.01	1126.39	182.051
	1442.84	1239.96	221.897
	1801.43	1339.7	226.836
	1461.69	1365.5	314.752
	1391.93	740.733	205.093
	1599.4	773.39	155.033
	2477.75	1850.48	334.537
	1406.26	1588.49	219.386
	1945.44	838.394	166.519
	1728.49	2055.06	247.704
	2136.69	726.172	149.594
	1553.62	1494.67	299.625

## Sheet: Sheet2
V (µm3)	A (µm2)		0.4692
1188.99	940.945
2166	2494.9
1303.7	1813.14
2256.6	873.236
924.352	889.149
1822.12	711.195
1598.65	766.942
1401.3	2057.76
1216.49	1597.85
1269.03	1968.84
2207.66	792.944
1029.54	703.914
1045.74	1247.35
2464.25	1855.16
1496.97	737.716
1629.24	1134.08
3478.4	2815.66
1830.39	675.521
1301.09	459.396
1495.35	1420.72
1153.97	640.783
1074.18	645.567
1381.65	263.968
1462.23	847.651
1136.12	832.154
1523.85	32.97
1101.16	1284.58
1116.54	674.065
899.307	464.076
1175.14	1001.68
1007.66	543.641
1512.13	760.91
1147.35	782.335
1109.83	739.069
808.913	1007.4
1230.22	625.494
933.412	747.389
839.925	561.114
1178.19	812.497
891.603	1413.44
750.804	1034.65
896.643	1586.2
849.109	802.72
1193.21	1305.9
1705.75	806.152
1332.18	792.216
1154.44	834.962
915.151	1319.32
1678.46	481.133
1399.76	421.017
1116.79	680.513
1234.87	420.081
1052.94	626.534
2526.99	1230.71
1136.88	1093.83
2668	1056.91
1438.66	1821.05
1343.25	966.634
1206.16	719.931
1593.68	1604.3
815.122	1825.83
883.827	1192.43
2948.67	31.93
1445.91	1392.75
1013.3	572.658
1348.5	393.768
1763.82	1451.2
1574.62	538.336
1863.2	709.323
3257.39	1022.9
1788.16	1856.2
764.878	128.968
2169.76	721.075
1386.56	724.508
1214.84	613.325
1293.89	869.076
1684.55	1765.3
953.443	765.902
1364.4	1439.03
1745.9	634.23
1172.99	436.93
2497.18	1665.87
1283.08	631.942
1151.01	1126.39
1442.84	1239.96
1801.43	1339.7
1461.69	1365.5
1391.93	740.733
1599.4	773.39
2477.75	1850.48
1406.26	1588.49
1945.44	838.394
1728.49	2055.06
2136.69	726.172
1553.62	1494.67
2334.88	1655.15
2823.22	1688.85
1758.18	1737.94
3209.89	1097.37
2058.46	1587.65
2412.79	2029.58
2204.25	1433.41
1284.98	1196.38
1514.16	1518.6
2630.51	1345.63
1340.3	969.754
2782.28	1303.3
2304.18	1527.54
1726.45	1212.09
2669.02	1940.65
1916.72	1112.04
1411.52	877.917
2526.82	2143.05
1975.57	1735.14
3005.8	1973.1
3324.86	2383.72
2563.94	1645.07
1957.54	1460.77
1729.72	997.732
1226.56	869.18
1756.3	765.59
2427.94	1443.19
1661.23	811.457
1433.95	1108.81
3541.98	1331.59
2078.75	961.538
1349.15	1235.49
2714.11	720.035
2259.48	851.915
1740.58	959.354
2771.18	1703.83
3221.03	2474.31
2338.97	1002.72
3163.46	1891.56
2079.1	1166.53
1527.9	559.242
2903.57	525.544
3303.74	2111.53
2200.23	884.365
1804.96	841.619
3421.2	1468.46
2708.37	1615.22
2132.33	1304.97
3294.85	629.238
2304.33	1115.26
2119.65	1230.6
1708.12	1049.94
2512.86	1124.52
2738.84	1656.09
920.494	1045.37
4380.41	2136.81
1569.92	847.755
2786.13	849.627
1846.66	1210.74
1609.83	958.21
1894.2	633.294
4836.54	1590.98
1686.37	1090.3
1607.15	741.253
1837.12	1498.21
1985.72	1173.09
1982.17	1142.09
3954.91	1303.41
3394.6	1117.13
2189.71	1339.5
2107.2	695.074
2183.64	999.292
1760.29	1379.12
2922.13	1550.73
1158.18	569.538
1378.2	1088.01
1216.12	467.716
1164.08	686.025
1304.23	570.37
1598	851.707
1021.76	701.834
1992.8	708.803
1461.41	841.099
1227.44	611.349
1838.13	502.662
1044.49	230.686
1102.81	708.283
1775.33	509.111
1073.99	779.007
1100.02	549.049
974.97	643.383
1231.24	524.296
733.946	357.365
853.153	489.453
1258.18	312.123
2580.33	73.636
1628.26	682.697
1779.22	1330.03
1154.42	795.752
1166.41	737.404
1230.13	735.636
1235.15	1224.88
1174	869.388
1164.07	775.159
1565.71	567.77
1192.97	884.261
918.588	607.605
1481.4	749.469
972.515	710.675
1286.86	920.871
1612.32	789.823
1400.04	665.328
938.903	322.003
1363.36	447.227
1144.19	263.656
1236.61	665.952
2177.01	531.68
937.242	474.477
2211.81	369.742
1392.52	1104.55
1118.95	1249.12
1371.83	1249.43
1069.35	54.291
983.862	694.45
4424.68	1673.25
1295.42	665.016
1430.55	869.596
