# Supplementary material for: A mechano-osmotic feedback couples cell volume to the rate of cell deformation
Source: eLife journal article supplement (doi:10.7554/elife.72381), 2022-04-13
Supplement: supp [file proportion of spread cells.xlsx]

## Sheet: control
position	1	1	1	1	1	1	1	1	1	1	1	1	2	2	2	2	2	2	2	2	2	2	3	3	3	3	3	3	3	3	3	3	3	3	4	4	4	4	4	4	4	5	5	5	5	5	5	6	6
cell	1	2	3	4	5	6	7	8	9	10	11	12	1	2	3	4	5	6	7	8	9	10	1	2	3	4	5	6	7	8	9	10	11	12	1	2	3	4	5	6	7	1	2	3	4	5	6	1	2
								1																							1
		1						1																							1					1		1
		1						1	1																						1					1		1							1	1		1
		1						1	1																						1					1		1							1	1		1	1
		1						1	1																						1					1		1							1	1		1	1
		1						1	1			1																			1					1		1							1	1		1	1
[truncated: 149 more columns]

## Sheet: y27
position	1	1	1	1	1	1	1	1	1	1	1	1	1	1	1	1	1	1	1	2	2	2	2	2	2	2	3	3	3	3	3	3	3	3	3	3	3	3	3	4	4	4	4	4	4	4	4	4	4
cell	1	2	3	4	5	6	7	8	9	10	11	12	13	14	16	17	18	19	20	1	2	4	5	6	7	8	1	2	3	4	5	6	7	8	9	10	11	12	13	1	2	3	4	5	6	7	8	9	10
		1			1	1				1																							1							1		1	1
	1	1	1		1	1				1	1	1	1	1	1		1						1	1				1			1	1	1	1			1		1	1		1	1			1
	1	1	1		1	1	1		1	1	1	1	1	1	1		1						1	1			1	1			1	1	1	1	1		1		1	1		1	1	1	1	1		1	1
	1	1	1		1	1	1		1	1	1	1	1	1	1		1						1	1			1	1	1	1	1	1	1	1	1		1		1	1		1	1	1	1	1		1	1
	1	1	1		1	1	1		1	1	1	1	1	1	1	1	1						1	1			1	1	1	1	1	1	1	1	1		1		1	1		1	1	1	1	1		1	1
	1	1	1		1	1	1		1	1	1	1	1	1	1	1	1						1	1			1	1	1	1	1	1	1	1	1		1		1	1		1	1	1	1	1		1	1
[truncated: 333 more columns]

## Sheet: final
control	Y-27	t (min)
0	0	0
0.515464	5.82011	10
3.09278	26.1905	20
10.3093	48.9418	30
15.4639	61.6402	40
21.6495	68.7831	50
37.6289	78.5714	60
