# Supplementary material for: A mechano-osmotic feedback couples cell volume to the rate of cell deformation
Source: eLife journal article supplement (doi:10.7554/elife.72381), 2022-04-13
Supplement: supp [file quantification.xlsx]

## Sheet: Filop_length raw_data
1	Control_7_exp_07.tif:0197-0417	942.432		1	Control_22_exp_07.tif:0160-0163	703.694		1	LatA_7_exp_04.tif:0218-0791	626.786		1	LatA_22_exp_04.tif:0168-0185	719.22
2	Control_7_exp_07.tif:0035-0416	27.8358		2	Control_22_exp_07.tif:0029-0150	31.4424		2	LatA_7_exp_04.tif:0108-0791	31.3663		2	LatA_22_exp_04.tif:0107-0082	6.35355
3	Control_7_exp_07.tif:0034-0426	19.8271		3	Control_22_exp_07.tif:0035-0159	16.964		3	LatA_7_exp_04.tif:0112-0828	30.6335		3	LatA_22_exp_04.tif:0387-0392	761.128
4	Control_7_exp_07.tif:0037-0454	16.1537		4	Control_22_exp_07.tif:0030-0178	34.6869		4	LatA_7_exp_04.tif:0113-0827	32.8052		4	LatA_22_exp_04.tif:0377-0501	9.09384
5	Control_7_exp_07.tif:0037-0468	40.7141		5	Control_22_exp_07.tif:0031-0172	33.8028		5	LatA_7_exp_04.tif:0155-0894	37.0841		5	LatA_22_exp_04.tif:0520-0401	16.3987
6	Control_7_exp_07.tif:0062-0527	58.2205		6	Control_22_exp_07.tif:0040-0185	16.5346		6	LatA_7_exp_04.tif:0171-0892	16.5778		6	LatA_22_exp_04.tif:0486-0477	13.1268
7	Control_7_exp_07.tif:0077-0526	34.7179		7	Control_22_exp_07.tif:0036-0200	19.7876		7	LatA_7_exp_04.tif:0182-0902	19.5376		7	LatA_22_exp_03.tif:0166-0193	706.418
8	Control_7_exp_07.tif:0068-0511	11.3123		8	Control_22_exp_07.tif:0029-0200	33.7336		8	LatA_7_exp_04.tif:0287-0882	12.5583		8	LatA_22_exp_03.tif:0104-0297	22.0612
9	Control_7_exp_07.tif:0067-0545	69.2359		9	Control_22_exp_07.tif:0041-0213	31.3045		9	LatA_7_exp_04.tif:0324-0849	33.0455		9	LatA_22_exp_03.tif:0203-0083	12.4907
10	Control_7_exp_07.tif:0085-0547	17.8962		10	Control_22_exp_07.tif:0040-0219	39.6842		10	LatA_7_exp_04.tif:0320-0841	15.9856		10	LatA_22_exp_03.tif:0195-0079	9.86114
11	Control_7_exp_07.tif:0099-0568	48.8939		11	Control_22_exp_07.tif:0065-0244	26.3583		11	LatA_7_exp_04.tif:0331-0777	13.5398		11	LatA_22_exp_03.tif:0176-0080	9.74088
12	Control_7_exp_07.tif:0107-0560	42.7736		12	Control_22_exp_07.tif:0059-0247	40.4051		12	LatA_7_exp_04.tif:0326-0769	10.7703		12	LatA_22_exp_03.tif:0160-0084	9.45333
13	Control_7_exp_07.tif:0131-0567	21.3956		13	Control_22_exp_07.tif:0083-0253	15.8741		13	LatA_7_exp_04.tif:0299-0713	22.1566		13	LatA_22_exp_03.tif:0127-0080	10.0083
14	Control_7_exp_07.tif:0149-0577	28.0756		14	Control_22_exp_07.tif:0084-0264	27.1359		14	LatA_7_exp_04.tif:0244-0684	15.9151		14	LatA_22_exp_02.tif:0233-0185	641.391
15	Control_7_exp_07.tif:0154-0592	76.0271		15	Control_22_exp_07.tif:0090-0270	31.3296		15	LatA_7_exp_04.tif:0227-0682	13.0385		15	LatA_22_exp_02.tif:0246-0078	14.3676
16	Control_7_exp_07.tif:0172-0572	13.0384		16	Control_22_exp_07.tif:0104-0267	18.486		16	LatA_7_exp_04.tif:0150-0704	20.6901		16	LatA_22_exp_02.tif:0223-0071	10.3432
17	Control_7_exp_07.tif:0180-0581	29.3479		17	Control_22_exp_07.tif:0116-0272	16.4978		17	LatA_7_exp_04.tif:0117-0718	34.6007		17	LatA_22_exp_02.tif:0196-0085	18.5693
18	Control_7_exp_07.tif:0197-0578	26.6453		18	Control_22_exp_07.tif:0133-0277	26.8289		18	LatA_7_exp_04.tif:0106-0789	26.2302		18	LatA_22_exp_02.tif:0168-0096	16.837
19	Control_7_exp_07.tif:0198-0598	61.4356		19	Control_22_exp_07.tif:0155-0297	31.391		19	LatA_7_exp_04.tif:0111-0742	28.6942		19	LatA_22_exp_02.tif:0230-0271	8.10201
20	Control_7_exp_07.tif:0226-0590	41.9386		20	Control_22_exp_07.tif:0167-0290	21.9227		20	LatA_7_exp_04.tif:0623-0559	725.254		20	LatA_22_exp_02.tif:0302-0115	13.1994
21	Control_7_exp_07.tif:0276-0579	52.4357		21	Control_22_exp_07.tif:0180-0288	26.2167		21	LatA_7_exp_04.tif:0541-0467	27.6263		21	LatA_22_exp_02.tif:0276-0089	13.8158
22	Control_7_exp_07.tif:0269-0581	54.6157		22	Control_22_exp_07.tif:0194-0286	21.3937		22	LatA_7_exp_04.tif:0637-0427	18.4422		22	LatA_22_exp_02.tif:0244-0278	9.34151
23	Control_7_exp_07.tif:0286-0570	39.7358		23	Control_22_exp_07.tif:0228-0279	32.1079		23	LatA_7_exp_04.tif:0748-0566	14.1362		23	LatA_22_exp_02.tif:0434-0460	673.045
24	Control_7_exp_07.tif:0330-0543	49.1859		24	Control_22_exp_07.tif:0236-0263	16.2235		24	LatA_7_exp_04.tif:0717-0638	12.2066		24	LatA_22_exp_02.tif:0271-0460	128.707
25	Control_7_exp_07.tif:0337-0524	32.9559		25	Control_22_exp_07.tif:0242-0252	10.5221		25	LatA_7_exp_04.tif:0680-0682	24.3117		25	LatA_22_exp_02.tif:0355-0356	22.6548
26	Control_7_exp_07.tif:0350-0498	37.4572		26	Control_22_exp_07.tif:0254-0250	27.1041		26	LatA_7_exp_04.tif:0516-0641	41.7802		26	LatA_22_exp_02.tif:0314-0498	28.0694
27	Control_7_exp_07.tif:0347-0500	32.7543		27	Control_22_exp_07.tif:0265-0237	20.6631		27	LatA_7_exp_04.tif:0719-0225	762.326		27	LatA_22_exp_02.tif:0562-0475	36.2004
28	Control_7_exp_07.tif:0381-0494	64.3338		28	Control_22_exp_07.tif:0275-0224	16.3832		28	LatA_7_exp_04.tif:0597-0273	36.9243		28	LatA_22_exp_02.tif:0560-0402	33.0236
29	Control_7_exp_07.tif:0368-0439	27.2482		29	Control_22_exp_07.tif:0279-0195	25.2745		29	LatA_7_exp_04.tif:0832-0332	28.2853		29	LatA_22_exp_02.tif:0429-0570	13.2769
30	Control_7_exp_07.tif:0353-0422	25.2167		30	Control_22_exp_07.tif:0284-0193	23.6158		30	LatA_7_exp_04.tif:0792-0120	23.7799		30	LatA_22_exp_01.tif:0200-0187	769.914
31	Control_7_exp_07.tif:0355-0407	22		31	Control_22_exp_07.tif:0282-0174	9.86709		31	LatA_7_exp_04.tif:0778-0115	19.0732		31	LatA_22_exp_01.tif:0097-0265	7.24336
32	Control_7_exp_07.tif:0361-0396	22		32	Control_22_exp_07.tif:0294-0160	36.4421		32	LatA_7_exp_04.tif:0755-0089	52.8428		32	LatA_22_exp_00.tif:0207-0243	978.503
33	Control_7_exp_07.tif:0359-0367	40.889		33	Control_22_exp_07.tif:0285-0154	18.0827		33	LatA_7_exp_04.tif:0719-0083	60.2753		33	LatA_22_exp_00.tif:0330-0394	123.796
34	Control_7_exp_07.tif:0362-0366	48.8588		34	Control_22_exp_07.tif:0276-0138	10.3631		34	LatA_7_exp_04.tif:0685-0089	54.3547		34	LatA_22_exp_00.tif:0312-0409	40.8664
35	Control_7_exp_07.tif:0359-0338	61.5909		35	Control_22_exp_07.tif:0276-0120	15.3542		35	LatA_7_exp_04.tif:0115-0127	711.475		35	LatA_22_exp_00.tif:0357-0308	56.8004
36	Control_7_exp_07.tif:0336-0329	48.7234		36	Control_22_exp_07.tif:0272-0105	26.2992		36	LatA_7_exp_04.tif:0090-0251	28.4187		36	LatA_22_exp_00.tif:0376-0302	49.5231
37	Control_7_exp_07.tif:0333-0315	42.2873		37	Control_22_exp_07.tif:0268-0097	22.8826		37	LatA_7_exp_04.tif:0150-0027	27.7249		37	LatA_22_exp_00.tif:0333-0312	13.2437
38	Control_7_exp_07.tif:0308-0296	38.3622		38	Control_22_exp_07.tif:0244-0074	24.2385		38	LatA_7_exp_03.tif:0206-0544	859.436		38	LatA_22_exp_00.tif:0324-0333	14.0187
39	Control_7_exp_07.tif:0305-0297	42.7167		39	Control_22_exp_07.tif:0233-0070	14.7802		39	LatA_7_exp_03.tif:0097-0593	15.5042		39	LatA_22_exp_00.tif:0228-0386	15.345
40	Control_7_exp_07.tif:0288-0262	67.7485		40	Control_22_exp_07.tif:0220-0055	26.6845		40	LatA_7_exp_03.tif:0330-0474	27.0417		40	LatA_22_exp_00.tif:0136-0403	32.5584
41	Control_7_exp_07.tif:0258-0234	71.8199		41	Control_22_exp_07.tif:0212-0050	28.4142		41	LatA_7_exp_03.tif:0255-0406	21.5984		41	LatA_22_exp_00.tif:0078-0373	17.7601
42	Control_7_exp_07.tif:0233-0253	46.6016		42	Control_22_exp_07.tif:0186-0031	43.7465		42	LatA_7_exp_03.tif:0154-0391	36.314		42	LatA_22_exp_00.tif:0052-0297	12.8149
43	Control_7_exp_07.tif:0220-0237	63.7466		43	Control_22_exp_07.tif:0164-0042	23.8379		43	LatA_7_exp_03.tif:0518-0574	761.956		43	LatA_22_exp_00.tif:0085-0228	16.6584
44	Control_7_exp_07.tif:0205-0261	20.2397		44	Control_22_exp_07.tif:0156-0048	10.9419		44	LatA_7_exp_03.tif:0426-0500	19.3637		44	LatA_22_exp_00.tif:0088-0163	11.5184
45	Control_7_exp_07.tif:0192-0261	24.1939		45	Control_22_exp_07.tif:0142-0031	41.6666		45	LatA_7_exp_03.tif:0627-0595	13.7523		45	LatA_22_exp_00.tif:0173-0083	10
46	Control_7_exp_07.tif:0190-0261	27.8543		46	Control_22_exp_07.tif:0121-0056	13.4257		46	LatA_7_exp_03.tif:0555-0688	16.6822		46	LatA_22_exp_00.tif:0095-0132	10.55
47	Control_7_exp_07.tif:0171-0260	44.4198		47	Control_22_exp_07.tif:0112-0052	34.6337		47	LatA_7_exp_03.tif:0520-0709	19.2276		47	LatA_22_exp_00.tif:0087-0163	9.48054
48	Control_7_exp_07.tif:0149-0260	46.2807		48	Control_22_exp_07.tif:0110-0060	18.1786		48	LatA_7_exp_03.tif:0476-0706	22.0493		48	LatA_22_exp_00.tif:0226-0091	8.86002
49	Control_7_exp_07.tif:0133-0272	45.4768		49	Control_22_exp_07.tif:0094-0061	28.2673		49	LatA_7_exp_03.tif:0429-0658	15.66		49	LatA_22_exp_00.tif:0207-0086	14.1301
50	Control_7_exp_07.tif:0107-0278	54.4214		50	Control_22_exp_07.tif:0083-0069	24.4732		50	LatA_7_exp_03.tif:0434-0496	12.5766		50	LatA_22_exp_00.tif:0311-0079	10.6085
51	Control_7_exp_07.tif:0102-0296	19.1462		51	Control_22_exp_07.tif:0074-0076	19.4644		51	LatA_7_exp_03.tif:0577-0462	17.8229		51	LatA_22_exp_00.tif:0282-0065	11.7041
52	Control_7_exp_07.tif:0084-0300	39.7908		52	Control_22_exp_07.tif:0069-0086	14.3947		52	LatA_7_exp_03.tif:0666-0262	793.128		52	LatA_22_exp_00.tif:0341-0147	12.8672
53	Control_7_exp_07.tif:0068-0321	35.4117		53	Control_22_exp_07.tif:0057-0086	35.2545		53	LatA_7_exp_03.tif:0544-0273	22.0264		53	LatA_22_exp_00.tif:0367-0227	9.56452
54	Control_7_exp_07.tif:0073-0312	37.4218		54	Control_22_exp_07.tif:0052-0106	13.8924		54	LatA_7_exp_03.tif:0559-0348	21.0009		54	LatA_22_exp_00.tif:0360-0183	10.4569
55	Control_7_exp_07.tif:0048-0348	26.3942		55	Control_22_exp_07.tif:0047-0120	11.8065		55	LatA_7_exp_03.tif:0564-0370	28.8066		55	LatA_22_exp_00.tif:0375-0304	49.5794
56	Control_7_exp_07.tif:0038-0353	43.1985		56	Control_22_exp_07.tif:0035-0139	26.3543		56	LatA_7_exp_03.tif:0577-0382	28.0856		56	LatA_22_exp_00.tif:0361-0312	44.2818
57	Control_7_exp_07.tif:0040-0392	22.0728		57	Control_22_exp_07.tif:0030-0152	29.2212		57	LatA_7_exp_03.tif:0609-0398	25.5527		57	LatA_22_exp_00.tif:0609-0482	719.839
58	Control_7_exp_07.tif:0584-0151	696.892		58	Control_22_exp_07.tif:0035-0160	10.6962		58	LatA_7_exp_03.tif:0635-0411	25.4366		58	LatA_22_exp_00.tif:0453-0438	54.7895
59	Control_7_exp_07.tif:0456-0157	35.1911		59	Control_22_exp_06.tif:0142-0342	585.334		59	LatA_7_exp_03.tif:0660-0413	23.7804		59	LatA_22_exp_00.tif:0456-0454	41.0285
60	Control_7_exp_07.tif:0461-0171	27.3842		60	Control_22_exp_06.tif:0038-0339	13.5747		60	LatA_7_exp_03.tif:0761-0367	24.6248		60	LatA_22_exp_00.tif:0457-0467	49.0687
61	Control_7_exp_07.tif:0472-0190	34.1295		61	Control_22_exp_06.tif:0042-0368	30.7339		61	LatA_7_exp_03.tif:0769-0361	21.5026		61	LatA_22_exp_00.tif:0468-0498	42.5161
62	Control_7_exp_07.tif:0480-0224	29.7785		62	Control_22_exp_06.tif:0051-0406	31.548		62	LatA_7_exp_03.tif:0776-0346	22.3365		62	LatA_22_exp_00.tif:0472-0509	44.4931
63	Control_7_exp_07.tif:0510-0249	15		63	Control_22_exp_06.tif:0060-0415	30.3862		63	LatA_7_exp_03.tif:0777-0332	10.018		63	LatA_22_exp_00.tif:0497-0519	34.2407
64	Control_7_exp_07.tif:0558-0261	15.0358		64	Control_22_exp_06.tif:0074-0429	39.2645		64	LatA_7_exp_03.tif:0788-0260	19.9849		64	LatA_22_exp_00.tif:0522-0533	42.1541
65	Control_7_exp_07.tif:0578-0272	26.9679		65	Control_22_exp_06.tif:0092-0432	21.908		65	LatA_7_exp_03.tif:0788-0227	20.904		65	LatA_22_exp_00.tif:0711-0546	28.359
66	Control_7_exp_07.tif:0648-0254	27.6708		66	Control_22_exp_06.tif:0088-0430	22.6249		66	LatA_7_exp_03.tif:0695-0128	14.3186		66	LatA_22_exp_00.tif:0700-0553	28.3644
67	Control_7_exp_07.tif:0671-0236	21.5432		67	Control_22_exp_06.tif:0114-0443	24.0663		67	LatA_7_exp_03.tif:0675-0119	12.0417		67	LatA_22_exp_00.tif:0577-0560	21.5552
68	Control_7_exp_07.tif:0707-0181	29.7965		68	Control_22_exp_06.tif:0129-0454	29.9773		68	LatA_7_exp_03.tif:0662-0111	13.1534		68	LatA_22_exp_00.tif:0732-0533	24.8558
69	Control_7_exp_07.tif:0710-0175	39.7792		69	Control_22_exp_06.tif:0150-0450	16.1992		69	LatA_7_exp_03.tif:0639-0115	15.5252		69	LatA_22_exp_00.tif:0727-0541	25.8553
70	Control_7_exp_07.tif:0702-0140	18.3251		70	Control_22_exp_06.tif:0161-0444	12.2442		70	LatA_7_exp_03.tif:0625-0127	17.0217		70	LatA_22_exp_00.tif:0747-0474	19.643
71	Control_7_exp_07.tif:0649-0034	29.9568		71	Control_22_exp_06.tif:0177-0437	9.49689		71	LatA_7_exp_03.tif:0840-0607	666.105		71	LatA_22_exp_00.tif:0713-0386	59.7262
72	Control_7_exp_07.tif:0635-0038	48.4754		72	Control_22_exp_06.tif:0196-0432	15.8574		72	LatA_7_exp_03.tif:0876-0704	18.6568		72	LatA_22_exp_00.tif:0602-0325	59.4865
73	Control_7_exp_07.tif:0599-0041	18.7543		73	Control_22_exp_06.tif:0224-0416	17.5887		73	LatA_7_exp_03.tif:0865-0711	19.9183		73	LatA_22_exp_00.tif:0557-0339	39.1658
74	Control_7_exp_07.tif:0568-0042	17.6109		74	Control_22_exp_06.tif:0241-0382	13.3185		74	LatA_7_exp_03.tif:0879-0689	18.0278		74	LatA_22_exp_00.tif:0529-0328	54.4023
75	Control_7_exp_07.tif:0541-0052	12.7413		75	Control_22_exp_06.tif:0254-0377	28.1126		75	LatA_7_exp_03.tif:0901-0520	18.2846		75	LatA_22_exp_00.tif:0655-0360	23.5624
76	Control_7_exp_07.tif:0527-0049	26.6397		76	Control_22_exp_06.tif:0253-0347	15.8199		76	LatA_7_exp_03.tif:0876-0494	31.1287		76	LatA_22_exp_00.tif:0451-0397	58.1622
77	Control_7_exp_07.tif:0513-0061	17.1547		77	Control_22_exp_06.tif:0256-0334	30.5058		77	LatA_7_exp_03.tif:0802-0733	19.6363		77	LatA_22_exp_11.tif:0195-0681	542.699
78	Control_7_exp_07.tif:0505-0069	12.9005		78	Control_22_exp_06.tif:0246-0317	9.58574		78	LatA_7_exp_02.tif:0275-0249	844.952		78	LatA_22_exp_11.tif:0135-0724	2.62153
79	Control_7_exp_07.tif:0493-0074	17.1851		79	Control_22_exp_06.tif:0238-0293	17.9151		79	LatA_7_exp_02.tif:0284-0101	43.6194		79	LatA_22_exp_11.tif:0478-0181	578.103
80	Control_7_exp_07.tif:0484-0077	20.6126		80	Control_22_exp_06.tif:0222-0268	14.9543		80	LatA_7_exp_02.tif:0225-0402	17.875		80	LatA_22_exp_11.tif:0545-0116	3.35949
81	Control_7_exp_07.tif:0471-0106	31.0045		81	Control_22_exp_06.tif:0199-0247	38.2475		81	LatA_7_exp_01.tif:0273-0316	872.751		81	LatA_22_exp_10.tif:0219-0819	599.028
82	Control_7_exp_07.tif:0460-0120	34.2138		82	Control_22_exp_06.tif:0190-0242	24.7047		82	LatA_7_exp_01.tif:0267-0474	32.7514		82	LatA_22_exp_10.tif:0304-0922	80.0899
83	Control_7_exp_07.tif:0468-0139	20.2214		83	Control_22_exp_06.tif:0150-0241	9.97785		83	LatA_7_exp_01.tif:0419-0314	25.6652		83	LatA_22_exp_10.tif:0274-0926	32.9246
84	Control_7_exp_06.tif:0336-0266	1254		84	Control_22_exp_06.tif:0124-0235	28.3148		84	LatA_7_exp_01.tif:0306-0166	13.3178		84	LatA_22_exp_10.tif:0273-0934	35.8932
85	Control_7_exp_06.tif:0082-0251	140.472		85	Control_22_exp_06.tif:0119-0242	17.5972		85	LatA_7_exp_00.tif:0195-0157	660.543		85	LatA_22_exp_10.tif:0257-0938	26.6505
86	Control_7_exp_06.tif:0125-0270	46.0478		86	Control_22_exp_06.tif:0105-0250	15.9887		86	LatA_7_exp_00.tif:0077-0193	19.8806		86	LatA_22_exp_10.tif:0211-0937	46.0322
87	Control_7_exp_06.tif:0210-0471	107.256		87	Control_22_exp_06.tif:0089-0262	14.0139		87	LatA_7_exp_00.tif:0103-0090	26.7451		87	LatA_22_exp_10.tif:0180-0920	19.408
88	Control_7_exp_06.tif:0222-0477	97.5027		88	Control_22_exp_06.tif:0064-0276	18.7271		88	LatA_7_exp_00.tif:0120-0067	26.4154		88	LatA_22_exp_10.tif:0175-0914	15.9156
89	Control_7_exp_06.tif:0191-0426	53.6927		89	Control_22_exp_06.tif:0054-0292	10.2841		89	LatA_7_exp_00.tif:0163-0048	17.627		89	LatA_22_exp_10.tif:0145-0903	31.1852
90	Control_7_exp_06.tif:0390-0503	96.1374		90	Control_22_exp_06.tif:0037-0327	15.1145		90	LatA_7_exp_00.tif:0208-0051	17.3349		90	LatA_22_exp_10.tif:0308-0888	29.4514
91	Control_7_exp_06.tif:0413-0480	69.7727		91	Control_22_exp_06.tif:0319-0173	574.155		91	LatA_7_exp_00.tif:0296-0091	14.7204		91	LatA_22_exp_10.tif:0320-0868	30.0133
92	Control_7_exp_06.tif:0511-0385	28.9795		92	Control_22_exp_06.tif:0213-0162	36.1749		92	LatA_7_exp_00.tif:0228-0280	22.6564		92	LatA_22_exp_10.tif:0326-0845	18.3787
93	Control_7_exp_06.tif:0559-0275	57.8552		93	Control_22_exp_06.tif:0210-0168	35.4235		93	LatA_7_exp_00.tif:0158-0272	13.895		93	LatA_22_exp_10.tif:0326-0821	17.3116
94	Control_7_exp_06.tif:0195-0122	66.7066		94	Control_22_exp_06.tif:0219-0191	13.4292		94	LatA_7_exp_08.tif:0376-0183	672.787		94	LatA_22_exp_10.tif:0327-0777	27.9236
95	Control_7_exp_06.tif:0165-0168	43.278		95	Control_22_exp_06.tif:0219-0212	40.8236		95	LatA_7_exp_08.tif:0272-0173	15.7435		95	LatA_22_exp_10.tif:0258-0729	18.5421
96	Control_7_exp_06.tif:0507-0111	41.7603		96	Control_22_exp_06.tif:0231-0225	18.9621		96	LatA_7_exp_08.tif:0476-0261	19.2585		96	LatA_22_exp_10.tif:0224-0719	11.4135
97	Control_7_exp_06.tif:0797-0430	774.837		97	Control_22_exp_06.tif:0243-0259	33.1207		97	LatA_7_exp_08.tif:0261-0702	908.838		97	LatA_22_exp_10.tif:0194-0718	18.2699
98	Control_7_exp_06.tif:0665-0350	61.147		98	Control_22_exp_06.tif:0265-0269	21.5519		98	LatA_7_exp_08.tif:0118-0685	21.6425		98	LatA_22_exp_10.tif:0159-0730	32.6705
99	Control_7_exp_06.tif:0663-0371	53.0805		99	Control_22_exp_06.tif:0287-0276	17.8332		99	LatA_7_exp_08.tif:0388-0752	22.2598		99	LatA_22_exp_10.tif:0140-0715	25.027
100	Control_7_exp_06.tif:0660-0398	19.7972		100	Control_22_exp_06.tif:0309-0284	21.5301		100	LatA_7_exp_08.tif:0411-0641	65.8757		100	LatA_22_exp_10.tif:0498-0496	629.089
101	Control_7_exp_06.tif:0659-0435	50.0061		101	Control_22_exp_06.tif:0338-0286	34.2179		101	LatA_7_exp_08.tif:0385-0606	13.865		101	LatA_22_exp_10.tif:0420-0577	26.3422
102	Control_7_exp_06.tif:0653-0462	66.6849		102	Control_22_exp_06.tif:0363-0275	28.1174		102	LatA_7_exp_08.tif:0386-0619	14.4019		102	LatA_22_exp_10.tif:0429-0591	19.901
103	Control_7_exp_06.tif:0669-0492	46.7748		103	Control_22_exp_06.tif:0377-0260	15.5062		103	LatA_7_exp_08.tif:0786-0593	703.567		103	LatA_22_exp_10.tif:0526-0620	30.7347
104	Control_7_exp_06.tif:0690-0504	23.9939		104	Control_22_exp_06.tif:0410-0238	32.5147		104	LatA_7_exp_08.tif:0789-0714	12		104	LatA_22_exp_10.tif:0541-0620	16.3869
105	Control_7_exp_06.tif:0707-0524	41.401		105	Control_22_exp_06.tif:0415-0225	20.6352		105	LatA_7_exp_08.tif:0761-0711	8.94427		105	LatA_22_exp_10.tif:0613-0543	23.3671
106	Control_7_exp_06.tif:0722-0553	44.5136		106	Control_22_exp_06.tif:0417-0208	17.0901		106	LatA_7_exp_08.tif:0745-0706	12.0501		106	LatA_22_exp_10.tif:0615-0504	24.2294
107	Control_7_exp_06.tif:0743-0569	36.0978		107	Control_22_exp_06.tif:0421-0187	17.5028		107	LatA_7_exp_08.tif:0890-0648	11.7397		107	LatA_22_exp_10.tif:0585-0420	45.0826
108	Control_7_exp_06.tif:0804-0569	43.7751		108	Control_22_exp_06.tif:0416-0161	7.23191		108	LatA_7_exp_08.tif:0863-0683	12.651		108	LatA_22_exp_10.tif:0474-0377	38.4723
109	Control_7_exp_06.tif:0832-0571	43.21		109	Control_22_exp_06.tif:0409-0113	29.2916		109	LatA_7_exp_08.tif:0855-0688	12.0446		109	LatA_22_exp_10.tif:0481-0376	21.3223
110	Control_7_exp_06.tif:0852-0561	33.0435		110	Control_22_exp_06.tif:0396-0112	10.2639		110	LatA_7_exp_08.tif:0871-0510	12.9316		110	LatA_22_exp_10.tif:0526-0618	20.9191
111	Control_7_exp_06.tif:0912-0495	29.0984		111	Control_22_exp_06.tif:0387-0103	18.9923		111	LatA_7_exp_08.tif:0828-0478	17.3841		111	LatA_22_exp_10.tif:0238-0158	786.094
112	Control_7_exp_06.tif:0920-0481	21.2546		112	Control_22_exp_06.tif:0367-0093	10.3891		112	LatA_7_exp_08.tif:0771-0466	24.7393		112	LatA_22_exp_10.tif:0113-0281	29.1356
113	Control_7_exp_06.tif:0929-0468	23.6174		113	Control_22_exp_06.tif:0341-0078	19.0032		113	LatA_7_exp_08.tif:0667-0598	14.9345		113	LatA_22_exp_10.tif:0203-0315	25.9314
114	Control_7_exp_06.tif:0927-0425	12.5439		114	Control_22_exp_06.tif:0355-0085	15.2584		114	LatA_7_exp_07.tif:0464-0240	584.982		114	LatA_22_exp_10.tif:0244-0324	13.3473
115	Control_7_exp_06.tif:0919-0374	29.5255		115	Control_22_exp_06.tif:0325-0075	19.5722		115	LatA_7_exp_07.tif:0391-0310	27.6127		115	LatA_22_exp_10.tif:0353-0239	54.3569
116	Control_7_exp_06.tif:0913-0355	20.5682		116	Control_22_exp_06.tif:0315-0077	13.4389		116	LatA_7_exp_07.tif:0495-0349	11.5454		116	LatA_22_exp_10.tif:0291-0275	14.742
117	Control_7_exp_06.tif:0867-0313	35.4053		117	Control_22_exp_06.tif:0301-0075	24.7878		117	LatA_7_exp_07.tif:0507-0143	15.9652		117	LatA_22_exp_10.tif:0374-0106	25.4657
118	Control_7_exp_06.tif:0851-0299	48.8758		118	Control_22_exp_06.tif:0294-0078	15.0861		118	LatA_7_exp_07.tif:0498-0141	15.1021		118	LatA_22_exp_10.tif:0310-0015	36.3594
119	Control_7_exp_06.tif:0814-0299	42.9535		119	Control_22_exp_06.tif:0269-0093	13.5273		119	LatA_7_exp_07.tif:0475-0129	21.4828		119	LatA_22_exp_10.tif:0285-0021	34.635
120	Control_7_exp_06.tif:0782-0294	27.396		120	Control_22_exp_06.tif:0254-0103	15.3973		120	LatA_7_exp_07.tif:0440-0140	13.2698		120	LatA_22_exp_10.tif:0140-0063	37.3012
121	Control_7_exp_06.tif:0733-0288	60.3219		121	Control_22_exp_06.tif:0238-0108	33.1571		121	LatA_7_exp_07.tif:0447-0673	749.831		121	LatA_22_exp_10.tif:0151-0063	27.8454
122	Control_7_exp_06.tif:0719-0300	37.5369		122	Control_22_exp_06.tif:0230-0120	28.4016		122	LatA_7_exp_07.tif:0465-0804	19.1714		122	LatA_22_exp_10.tif:0169-0037	33.9022
123	Control_7_exp_06.tif:0709-0316	27.91		123	Control_22_exp_05.tif:0151-0139	612.353		123	LatA_7_exp_07.tif:0458-0797	19.1631		123	LatA_22_exp_10.tif:0156-0043	19.1862
124	Control_7_exp_06.tif:0790-0749	1009.8		124	Control_22_exp_05.tif:0047-0162	13.2598		124	LatA_7_exp_07.tif:0452-0792	18.6655		124	LatA_22_exp_10.tif:0103-0089	22.4685
125	Control_7_exp_06.tif:0630-0661	50.2479		125	Control_22_exp_05.tif:0053-0186	15.1062		125	LatA_7_exp_07.tif:0473-0806	19.9707		125	LatA_22_exp_10.tif:0112-0158	33.017
126	Control_7_exp_06.tif:0622-0689	26.2621		126	Control_22_exp_05.tif:0063-0215	37.4182		126	LatA_7_exp_07.tif:0531-0789	16.1414		126	LatA_22_exp_10.tif:0098-0136	31.108
127	Control_7_exp_06.tif:0619-0740	28.6987		127	Control_22_exp_05.tif:0084-0227	20.1093		127	LatA_7_exp_07.tif:0572-0733	23.7124		127	LatA_22_exp_10.tif:0111-0246	18.1087
128	Control_7_exp_06.tif:0634-0810	33.8404		128	Control_22_exp_05.tif:0093-0235	23.2467		128	LatA_7_exp_07.tif:0577-0681	22.2469		128	LatA_22_exp_09.tif:0193-0231	782.523
129	Control_7_exp_06.tif:0669-0904	91.3249		129	Control_22_exp_05.tif:0145-0248	26.0578		129	LatA_7_exp_07.tif:0441-0560	27.5966		129	LatA_22_exp_09.tif:0066-0177	9.52506
130	Control_7_exp_06.tif:0695-0902	26.0661		130	Control_22_exp_05.tif:0156-0247	16.9615		130	LatA_7_exp_07.tif:0199-0775	565.064		130	LatA_22_exp_08.tif:0175-0193	855.406
131	Control_7_exp_06.tif:0750-0930	38.9476		131	Control_22_exp_05.tif:0167-0246	17.3153		131	LatA_7_exp_07.tif:0143-0688	23.1802		131	LatA_22_exp_08.tif:0148-0340	8.52087
132	Control_7_exp_06.tif:0816-0931	31.8491		132	Control_22_exp_05.tif:0174-0248	18.7098		132	LatA_7_exp_07.tif:0162-0661	38.7009		132	LatA_22_exp_08.tif:0155-0044	24.702
133	Control_7_exp_06.tif:0860-0908	31.8517		133	Control_22_exp_05.tif:0197-0243	25.2218		133	LatA_7_exp_07.tif:0155-0668	31.6594		133	LatA_22_exp_08.tif:0165-0052	11.7061
134	Control_7_exp_06.tif:0900-0896	28.456		134	Control_22_exp_05.tif:0201-0244	24.0208		134	LatA_7_exp_07.tif:0276-0829	20.0595		134	LatA_22_exp_08.tif:0478-0197	479.742
135	Control_7_exp_06.tif:0943-0861	50.0269		135	Control_22_exp_05.tif:0214-0228	12.1106		135	LatA_7_exp_07.tif:0273-0855	19.4195		135	LatA_22_exp_08.tif:0450-0281	14.4844
136	Control_7_exp_06.tif:0948-0830	29.2746		136	Control_22_exp_05.tif:0229-0219	15.6529		136	LatA_7_exp_07.tif:0252-0874	20.0158		136	LatA_22_exp_08.tif:0536-0120	13.3034
137	Control_7_exp_06.tif:0967-0773	25.6283		137	Control_22_exp_05.tif:0235-0213	13.5719		137	LatA_7_exp_07.tif:0244-0693	12.0454		137	LatA_22_exp_07.tif:0171-0145	650.248
138	Control_7_exp_06.tif:0960-0730	32.5181		138	Control_22_exp_05.tif:0247-0212	26.0889		138	LatA_7_exp_06.tif:0270-0585	636.753		138	LatA_22_exp_07.tif:0126-0052	2.58836
139	Control_7_exp_06.tif:0958-0680	22.2723		139	Control_22_exp_05.tif:0255-0171	10.4144		139	LatA_7_exp_06.tif:0177-0645	13.257		139	LatA_22_exp_06.tif:0188-0177	699.775
140	Control_7_exp_06.tif:0871-0598	27.4384		140	Control_22_exp_05.tif:0264-0156	31.4227		140	LatA_7_exp_06.tif:0211-0676	9.06237		140	LatA_22_exp_06.tif:0062-0176	13.1439
141	Control_7_exp_06.tif:0704-0583	45.0168		141	Control_22_exp_05.tif:0274-0144	36.925		141	LatA_7_exp_06.tif:0226-0682	7.51665		141	LatA_22_exp_06.tif:0089-0247	5.21454
142	Control_7_exp_05.tif:0382-0560	658.218		142	Control_22_exp_05.tif:0264-0112	22.6705		142	LatA_7_exp_06.tif:0331-0668	9.92472		142	LatA_22_exp_06.tif:0171-0061	4.00069
143	Control_7_exp_05.tif:0268-0541	21.1804		143	Control_22_exp_05.tif:0259-0099	18.3422		143	LatA_7_exp_06.tif:0321-0491	9.01388		143	LatA_22_exp_05.tif:0153-0243	508.862
144	Control_7_exp_05.tif:0265-0563	13.9811		144	Control_22_exp_05.tif:0244-0087	15.4153		144	LatA_7_exp_06.tif:0338-0507	7.81345		144	LatA_22_exp_05.tif:0252-0224	18.6432
145	Control_7_exp_05.tif:0304-0668	48.608		145	Control_22_exp_05.tif:0225-0061	23.1915		145	LatA_7_exp_06.tif:0355-0514	9.27352		145	LatA_22_exp_05.tif:0163-0164	5.22351
146	Control_7_exp_05.tif:0348-0687	23.421		146	Control_22_exp_05.tif:0226-0071	7.82282		146	LatA_7_exp_06.tif:0231-0488	14.8165		146	LatA_22_exp_05.tif:0076-0258	10.4112
147	Control_7_exp_05.tif:0374-0690	23.0842		147	Control_22_exp_05.tif:0210-0046	33.5234		147	LatA_7_exp_06.tif:0215-0498	11.2712		147	LatA_22_exp_05.tif:0292-0480	683.369
148	Control_7_exp_05.tif:0406-0681	14.9386		148	Control_22_exp_05.tif:0196-0043	17.5418		148	LatA_7_exp_06.tif:0186-0530	9.92472		148	LatA_22_exp_05.tif:0310-0616	33.9088
149	Control_7_exp_05.tif:0444-0674	49.8465		149	Control_22_exp_05.tif:0182-0035	15.1815		149	LatA_7_exp_06.tif:0167-0590	10.6271		149	LatA_22_exp_05.tif:0425-0452	12.0375
150	Control_7_exp_05.tif:0498-0546	26.414		150	Control_22_exp_05.tif:0166-0035	11.9901		150	LatA_7_exp_06.tif:0184-0530	12.4568		150	LatA_22_exp_05.tif:0239-0369	13.7008
151	Control_7_exp_05.tif:0496-0519	33.0168		151	Control_22_exp_05.tif:0153-0034	11.1354		151	LatA_7_exp_06.tif:0259-0479	16.098		151	LatA_22_exp_05.tif:0181-0395	23.7509
152	Control_7_exp_05.tif:0472-0482	21.3776		152	Control_22_exp_05.tif:0133-0032	22.4472		152	LatA_7_exp_06.tif:0490-0220	854.096		152	LatA_22_exp_05.tif:0241-0370	7.75192
153	Control_7_exp_05.tif:0428-0453	20.1509		153	Control_22_exp_05.tif:0106-0048	14.0143		153	LatA_7_exp_06.tif:0356-0121	20.2298		153	LatA_22_exp_05.tif:0660-0282	582.805
154	Control_7_exp_05.tif:0385-0441	33.1911		154	Control_22_exp_05.tif:0094-0046	27.2118		154	LatA_7_exp_06.tif:0347-0131	17.8805		154	LatA_22_exp_05.tif:0681-0389	33.6005
155	Control_7_exp_05.tif:0368-0445	17.2977		155	Control_22_exp_05.tif:0085-0057	20.0842		155	LatA_7_exp_06.tif:0546-0107	34.8566		155	LatA_22_exp_05.tif:0708-0383	36.0073
156	Control_7_exp_05.tif:0301-0471	30.3464		156	Control_22_exp_05.tif:0052-0108	13.8076		156	LatA_7_exp_06.tif:0422-0326	9.0139		156	LatA_22_exp_05.tif:0715-0169	20.0171
157	Control_7_exp_05.tif:0291-0482	25.0238		157	Control_22_exp_05.tif:0048-0123	12.8673		157	LatA_7_exp_06.tif:0359-0264	10.1855		157	LatA_22_exp_05.tif:0632-0172	18.9123
158	Control_7_exp_05.tif:0219-0202	981.634		158	Control_22_exp_05.tif:0070-0079	9.50507		158	LatA_7_exp_06.tif:0575-0144	10.4427		158	LatA_22_exp_05.tif:0624-0180	17.5887
159	Control_7_exp_05.tif:0057-0190	26.0396		159	Control_22_exp_05.tif:0448-0639	642.854		159	LatA_7_exp_06.tif:0571-0140	10.7117		159	LatA_22_exp_05.tif:0598-0183	36.0036
160	Control_7_exp_05.tif:0073-0281	40.9234		160	Control_22_exp_05.tif:0325-0666	44.0195		160	LatA_7_exp_05.tif:0296-0314	738.402		160	LatA_22_exp_05.tif:0546-0262	15.6302
161	Control_7_exp_05.tif:0080-0294	35.2052		161	Control_22_exp_05.tif:0332-0668	33.5872		161	LatA_7_exp_05.tif:0182-0340	10.8235		161	LatA_22_exp_05.tif:0545-0272	21.0993
162	Control_7_exp_05.tif:0160-0353	34.1969		162	Control_22_exp_05.tif:0332-0653	17.8012		162	LatA_7_exp_05.tif:0412-0350	21.0463		162	LatA_22_exp_05.tif:0554-0218	14.8074
163	Control_7_exp_05.tif:0180-0368	37.4305		163	Control_22_exp_05.tif:0339-0681	21.4585		163	LatA_7_exp_05.tif:0325-0176	28.8269		163	LatA_22_exp_05.tif:0782-0312	16.5699
164	Control_7_exp_05.tif:0352-0326	36.5224		164	Control_22_exp_05.tif:0343-0696	21.2055		164	LatA_7_exp_05.tif:0254-0191	18.0393
165	Control_7_exp_05.tif:0375-0294	39.9767		165	Control_22_exp_05.tif:0345-0712	51.9094		165	LatA_7_exp_05.tif:0397-0247	23.1157
166	Control_7_exp_05.tif:0383-0266	41.1799		166	Control_22_exp_05.tif:0368-0723	18.9808		166	LatA_7_exp_05.tif:0273-0454	27
167	Control_7_exp_05.tif:0380-0268	28.4933		167	Control_22_exp_05.tif:0365-0713	16.0978		167	LatA_7_exp_05.tif:0489-0659	839.32
168	Control_7_exp_05.tif:0382-0186	25.8442		168	Control_22_exp_05.tif:0381-0728	12.1754		168	LatA_7_exp_05.tif:0429-0791	17.3062
169	Control_7_exp_05.tif:0380-0099	44.4083		169	Control_22_exp_05.tif:0388-0741	31.7211		169	LatA_7_exp_05.tif:0518-0791	20.9276
170	Control_7_exp_05.tif:0304-0058	21.9645		170	Control_22_exp_05.tif:0408-0750	23.597		170	LatA_7_exp_05.tif:0530-0782	15
171	Control_7_exp_05.tif:0257-0042	16.4335		171	Control_22_exp_05.tif:0420-0746	12.6772		171	LatA_7_exp_05.tif:0453-0790	11.0627
172	Control_7_exp_05.tif:0128-0056	34.6941		172	Control_22_exp_05.tif:0427-0755	22.2376		172	LatA_7_exp_05.tif:0378-0754	9.84886
173	Control_7_exp_05.tif:0098-0082	74.7591		173	Control_22_exp_05.tif:0444-0759	35.433		173	LatA_7_exp_05.tif:0321-0708	18.6369
174	Control_7_exp_05.tif:0062-0173	24.6985		174	Control_22_exp_05.tif:0469-0763	41.7544		174	LatA_7_exp_05.tif:0340-0715	10.3011
175	Control_7_exp_03.tif:0235-0809	757.805		175	Control_22_exp_05.tif:0459-0758	24.3532		175	LatA_7_exp_05.tif:0486-0530	18.7878
176	Control_7_exp_03.tif:0097-0791	25.0538		176	Control_22_exp_05.tif:0493-0745	16.4084		176	LatA_7_exp_05.tif:0604-0589	19.7664
177	Control_7_exp_03.tif:0108-0831	22.2398		177	Control_22_exp_05.tif:0511-0734	12.2501		177	LatA_7_exp_05.tif:0623-0729	25.7491
178	Control_7_exp_03.tif:0373-0841	24.0063		178	Control_22_exp_05.tif:0538-0720	23.217		178	LatA_7_exp_05.tif:0629-0658	15.3268
179	Control_7_exp_03.tif:0376-0794	34.1626		179	Control_22_exp_05.tif:0560-0703	37.5508		179	LatA_7_exp_05.tif:0459-0532	19.0973
180	Control_7_exp_03.tif:0332-0720	33.174		180	Control_22_exp_05.tif:0557-0687	22.4964		180	LatA_7_exp_05.tif:0573-0924	665.809
181	Control_7_exp_03.tif:0309-0690	25.8211		181	Control_22_exp_05.tif:0576-0672	46.6327		181	LatA_7_exp_05.tif:0459-0907	27.7023
182	Control_7_exp_03.tif:0245-0668	21.6173		182	Control_22_exp_05.tif:0571-0655	41.2469		182	LatA_7_exp_05.tif:0466-0955	20.7146
183	Control_7_exp_03.tif:0172-0681	35.1264		183	Control_22_exp_05.tif:0567-0634	14.0627		183	LatA_7_exp_05.tif:0471-0876	46.1463
184	Control_7_exp_03.tif:0112-0761	31.8713		184	Control_22_exp_05.tif:0559-0627	18.0506		184	LatA_7_exp_05.tif:0491-1007	14.5648
185	Control_7_exp_03.tif:0310-0695	27.3282		185	Control_22_exp_05.tif:0571-0609	37.7628		185	LatA_7_exp_05.tif:0565-0815	13.9516
186	Control_7_exp_03.tif:0103-0794	27.1967		186	Control_22_exp_05.tif:0546-0591	9.6475		186	LatA_7_exp_05.tif:0543-0828	26.1343
187	Control_7_exp_03.tif:0362-0187	970.186		187	Control_22_exp_05.tif:0542-0582	15.8154		187	LatA_7_exp_05.tif:0593-0819	15.3218
188	Control_7_exp_03.tif:0197-0186	33.5122		188	Control_22_exp_05.tif:0542-0564	34.9033		188	LatA_7_exp_05.tif:0609-0826	19.1678
189	Control_7_exp_03.tif:0197-0204	15.0438		189	Control_22_exp_05.tif:0532-0560	33.5573		189	LatA_7_exp_05.tif:0696-0946	25.5319
190	Control_7_exp_03.tif:0197-0235	27.9995		190	Control_22_exp_05.tif:0520-0555	12.3882		190	LatA_7_exp_05.tif:0693-0901	14.555
191	Control_7_exp_03.tif:0278-0326	27.1295		191	Control_22_exp_05.tif:0503-0540	16.362		191	LatA_7_exp_05.tif:0646-0820	13.6571
192	Control_7_exp_03.tif:0289-0331	22.6713		192	Control_22_exp_05.tif:0490-0537	14.6085		192	LatA_7_exp_05.tif:0613-0819	11.181
193	Control_7_exp_03.tif:0297-0336	28.8274		193	Control_22_exp_05.tif:0465-0523	28.1801		193	LatA_7_exp_05.tif:0608-0827	14.181
194	Control_7_exp_03.tif:0306-0351	39.9981		194	Control_22_exp_05.tif:0453-0523	18.8865		194	LatA_7_exp_05.tif:0691-0901	12.1008
195	Control_7_exp_03.tif:0319-0345	22.7236		195	Control_22_exp_05.tif:0445-0520	25.1623		195	LatA_7_exp_05.tif:0862-0404	648.606
196	Control_7_exp_03.tif:0336-0347	26.4228		196	Control_22_exp_05.tif:0427-0519	33.7683		196	LatA_7_exp_05.tif:0883-0292	14.1989
197	Control_7_exp_03.tif:0355-0347	12.651		197	Control_22_exp_05.tif:0373-0535	51.5792		197	LatA_7_exp_05.tif:0867-0301	16.3266
198	Control_7_exp_03.tif:0390-0359	31.5215		198	Control_22_exp_05.tif:0368-0536	51.7948		198	LatA_7_exp_05.tif:0775-0318	10.7718
199	Control_7_exp_03.tif:0422-0342	28.4258		199	Control_22_exp_05.tif:0358-0559	38.5743		199	LatA_7_exp_05.tif:0968-0378	12.3638
200	Control_7_exp_03.tif:0434-0353	51.9845		200	Control_22_exp_05.tif:0358-0578	20.4676
201	Control_7_exp_03.tif:0455-0332	18.3919		201	Control_22_exp_05.tif:0339-0592	35.7816
202	Control_7_exp_03.tif:0473-0336	49.0792		202	Control_22_exp_04.tif:0155-0153	638.038
203	Control_7_exp_03.tif:0486-0332	47.5055		203	Control_22_exp_04.tif:0042-0169	26.9092
204	Control_7_exp_03.tif:0497-0303	30.6289		204	Control_22_exp_04.tif:0049-0177	18.8944
205	Control_7_exp_03.tif:0508-0280	21.615		205	Control_22_exp_04.tif:0055-0193	17.1789
206	Control_7_exp_03.tif:0533-0262	44.4191		206	Control_22_exp_04.tif:0052-0201	25.2269
207	Control_7_exp_03.tif:0528-0238	18.7126		207	Control_22_exp_04.tif:0060-0210	23.6651
208	Control_7_exp_03.tif:0535-0208	22.7628		208	Control_22_exp_04.tif:0061-0224	33.7424
209	Control_7_exp_03.tif:0537-0190	23.9948		209	Control_22_exp_04.tif:0072-0245	47.697
210	Control_7_exp_03.tif:0525-0155	27.1441		210	Control_22_exp_04.tif:0091-0242	18.3235
211	Control_7_exp_03.tif:0513-0137	14.3219		211	Control_22_exp_04.tif:0091-0258	37.5588
212	Control_7_exp_03.tif:0496-0096	25.007		212	Control_22_exp_04.tif:0100-0268	47.5917
213	Control_7_exp_03.tif:0472-0062	34.0335		213	Control_22_exp_04.tif:0112-0272	41.0926
214	Control_7_exp_03.tif:0423-0038	38.5281		214	Control_22_exp_04.tif:0135-0265	22.9797
215	Control_7_exp_03.tif:0390-0029	37.8203		215	Control_22_exp_04.tif:0181-0269	17.652
216	Control_7_exp_03.tif:0385-0028	42.3664		216	Control_22_exp_04.tif:0191-0266	20.967
217	Control_7_exp_03.tif:0323-0026	51.379		217	Control_22_exp_04.tif:0214-0252	21.2852
218	Control_7_exp_03.tif:0273-0063	25.5768		218	Control_22_exp_04.tif:0238-0241	24.7447
219	Control_7_exp_03.tif:0261-0074	32.6795		219	Control_22_exp_04.tif:0243-0225	16.1601
220	Control_7_exp_03.tif:0266-0072	51.7308		220	Control_22_exp_04.tif:0256-0209	27.0898
221	Control_7_exp_03.tif:0236-0100	28.6993		221	Control_22_exp_04.tif:0261-0197	37.8897
222	Control_7_exp_03.tif:0255-0094	15.5242		222	Control_22_exp_04.tif:0261-0187	25.5951
223	Control_7_exp_03.tif:0206-0142	28.5644		223	Control_22_exp_04.tif:0274-0171	44.9759
224	Control_7_exp_03.tif:0225-0121	20.3385		224	Control_22_exp_04.tif:0273-0148	39.0222
225	Control_7_exp_04.tif:0170-0159	759.666		225	Control_22_exp_04.tif:0265-0130	21.011
226	Control_7_exp_04.tif:0042-0167	26.6214		226	Control_22_exp_04.tif:0256-0099	40.6763
227	Control_7_exp_04.tif:0046-0178	17.7568		227	Control_22_exp_04.tif:0259-0111	29.8685
228	Control_7_exp_04.tif:0047-0200	15.452		228	Control_22_exp_04.tif:0239-0082	19.6568
229	Control_7_exp_04.tif:0055-0225	35.5704		229	Control_22_exp_04.tif:0233-0074	23.293
230	Control_7_exp_04.tif:0068-0234	16.3904		230	Control_22_exp_04.tif:0235-0069	34.2009
231	Control_7_exp_04.tif:0084-0256	35.1625		231	Control_22_exp_04.tif:0221-0060	23.9318
232	Control_7_exp_04.tif:0107-0268	26.5941		232	Control_22_exp_04.tif:0203-0054	22.8694
233	Control_7_exp_04.tif:0166-0294	27.3195		233	Control_22_exp_04.tif:0194-0043	43.792
234	Control_7_exp_04.tif:0204-0284	18.3318		234	Control_22_exp_04.tif:0171-0031	50.711
235	Control_7_exp_04.tif:0235-0271	19.9215		235	Control_22_exp_04.tif:0161-0040	26.9958
236	Control_7_exp_04.tif:0263-0242	10.7784		236	Control_22_exp_04.tif:0138-0038	43.3302
237	Control_7_exp_04.tif:0279-0218	20.8524		237	Control_22_exp_04.tif:0133-0045	25.0514
238	Control_7_exp_04.tif:0286-0215	27.2921		238	Control_22_exp_04.tif:0125-0049	23.5848
239	Control_7_exp_04.tif:0303-0181	42.64		239	Control_22_exp_04.tif:0116-0053	27.0132
240	Control_7_exp_04.tif:0291-0136	24.0197		240	Control_22_exp_04.tif:0094-0063	31.233
241	Control_7_exp_04.tif:0285-0110	12.7008		241	Control_22_exp_04.tif:0079-0078	19.2638
242	Control_7_exp_04.tif:0266-0077	13.555		242	Control_22_exp_04.tif:0069-0089	10.3105
243	Control_7_exp_04.tif:0267-0045	60.5507		243	Control_22_exp_04.tif:0050-0118	18.8634
244	Control_7_exp_04.tif:0206-0041	19.5383		244	Control_22_exp_04.tif:0042-0150	20.3757
245	Control_7_exp_04.tif:0176-0033	15.1119		245	Control_22_exp_03.tif:0164-0155	599.177
246	Control_7_exp_04.tif:0166-0040	17.06		246	Control_22_exp_03.tif:0059-0153	23.8758
247	Control_7_exp_04.tif:0127-0030	52.4723		247	Control_22_exp_03.tif:0061-0181	14.6336
248	Control_7_exp_04.tif:0126-0043	21.6461		248	Control_22_exp_03.tif:0064-0198	18.4761
249	Control_7_exp_04.tif:0112-0052	20.2196		249	Control_22_exp_03.tif:0104-0243	30.9726
250	Control_7_exp_04.tif:0095-0063	21.9969		250	Control_22_exp_03.tif:0100-0256	46.0957
251	Control_7_exp_04.tif:0073-0068	34.9248		251	Control_22_exp_03.tif:0117-0253	30.2966
252	Control_7_exp_04.tif:0064-0100	18.5243		252	Control_22_exp_03.tif:0131-0258	15.1158
253	Control_7_exp_04.tif:0055-0115	26.2696		253	Control_22_exp_03.tif:0141-0263	32.1006
254	Control_7_exp_04.tif:0057-0131	16.3608		254	Control_22_exp_03.tif:0156-0257	17.7435
255	Control_7_exp_04.tif:0043-0167	26.4348		255	Control_22_exp_03.tif:0178-0263	28.4364
256	Control_7_exp_02.tif:0196-0207	815.029		256	Control_22_exp_03.tif:0184-0255	14.9151
257	Control_7_exp_02.tif:0051-0232	36.7475		257	Control_22_exp_03.tif:0197-0259	25.9005
258	Control_7_exp_02.tif:0070-0290	36.9833		258	Control_22_exp_03.tif:0209-0262	38.18
259	Control_7_exp_02.tif:0071-0308	55.6174		259	Control_22_exp_03.tif:0227-0249	20.7294
260	Control_7_exp_02.tif:0125-0348	18.5449		260	Control_22_exp_03.tif:0235-0247	35.8426
261	Control_7_exp_02.tif:0258-0346	35.2404		261	Control_22_exp_03.tif:0247-0235	19.0756
262	Control_7_exp_02.tif:0279-0323	22.5464		262	Control_22_exp_03.tif:0253-0223	13.3994
263	Control_7_exp_02.tif:0168-0063	29.4022		263	Control_22_exp_03.tif:0266-0192	19.2164
264	Control_7_exp_02.tif:0124-0088	24.9927		264	Control_22_exp_03.tif:0273-0173	12.7021
265	Control_7_exp_02.tif:0085-0090	83.695		265	Control_22_exp_03.tif:0277-0158	26.0224
266	Control_7_exp_02.tif:0061-0114	80.392		266	Control_22_exp_03.tif:0276-0155	26.9123
267	Control_7_exp_02.tif:0067-0138	31.5191		267	Control_22_exp_03.tif:0270-0108	22.9181
268	Control_7_exp_02.tif:0067-0152	32.2325		268	Control_22_exp_03.tif:0253-0092	16.8518
269	Control_7_exp_02.tif:0677-0242	606.908		269	Control_22_exp_03.tif:0226-0076	11.2734
270	Control_7_exp_02.tif:0573-0252	21.9306		270	Control_22_exp_03.tif:0197-0060	15.8271
271	Control_7_exp_02.tif:0577-0276	29.2934		271	Control_22_exp_03.tif:0187-0059	13.3529
272	Control_7_exp_02.tif:0592-0321	42.2779		272	Control_22_exp_03.tif:0164-0055	19.19
273	Control_7_exp_02.tif:0673-0350	24.0043		273	Control_22_exp_03.tif:0139-0058	9.55547
274	Control_7_exp_02.tif:0719-0343	20.1813		274	Control_22_exp_03.tif:0128-0059	11.8893
275	Control_7_exp_02.tif:0778-0296	33.9408		275	Control_22_exp_03.tif:0085-0080	34.9708
276	Control_7_exp_02.tif:0755-0184	15.1531		276	Control_22_exp_03.tif:0098-0070	17.5347
277	Control_7_exp_02.tif:0720-0136	42.9856		277	Control_22_exp_03.tif:0064-0120	25.8212
278	Control_7_exp_02.tif:0625-0139	15.3802		278	Control_22_exp_03.tif:0061-0148	15.0906
279	Control_7_exp_02.tif:0615-0157	34.9683		279	Control_22_exp_02.tif:0420-0159	635.716
280	Control_7_exp_02.tif:0581-0171	58.8291		280	Control_22_exp_02.tif:0314-0157	24.2135
281	Control_7_exp_02.tif:0582-0205	22.3259		281	Control_22_exp_02.tif:0316-0191	22.7311
282	Control_7_exp_01.tif:0225-0192	943.527		282	Control_22_exp_02.tif:0317-0204	23.1828
283	Control_7_exp_01.tif:0074-0167	16.426		283	Control_22_exp_02.tif:0320-0213	24.7494
284	Control_7_exp_01.tif:0069-0185	14.2874		284	Control_22_exp_02.tif:0323-0227	27.5646
285	Control_7_exp_01.tif:0086-0281	42.8715		285	Control_22_exp_02.tif:0339-0235	10.4123
286	Control_7_exp_01.tif:0174-0341	32.9266		286	Control_22_exp_02.tif:0359-0262	27.3037
287	Control_7_exp_01.tif:0191-0357	26.8426		287	Control_22_exp_02.tif:0364-0263	20.2936
288	Control_7_exp_01.tif:0239-0361	35.6602		288	Control_22_exp_02.tif:0389-0279	34.0574
289	Control_7_exp_01.tif:0261-0356	28.963		289	Control_22_exp_02.tif:0416-0279	24.7015
290	Control_7_exp_01.tif:0248-0355	22.1075		290	Control_22_exp_02.tif:0430-0273	21.2526
291	Control_7_exp_01.tif:0297-0344	58.1699		291	Control_22_exp_02.tif:0463-0268	27.8492
292	Control_7_exp_01.tif:0332-0310	43.9417		292	Control_22_exp_02.tif:0471-0265	31.4745
293	Control_7_exp_01.tif:0375-0300	68.0953		293	Control_22_exp_02.tif:0483-0261	15.671
294	Control_7_exp_01.tif:0380-0283	54.5058		294	Control_22_exp_02.tif:0494-0256	27.4742
295	Control_7_exp_01.tif:0388-0256	41.1253		295	Control_22_exp_02.tif:0515-0233	38.3115
296	Control_7_exp_01.tif:0391-0232	29.9845		296	Control_22_exp_02.tif:0522-0208	15.2216
297	Control_7_exp_01.tif:0392-0193	24.1796		297	Control_22_exp_02.tif:0536-0193	27.5356
298	Control_7_exp_01.tif:0364-0118	25.8455		298	Control_22_exp_02.tif:0539-0187	22.9352
299	Control_7_exp_01.tif:0327-0083	36.4715		299	Control_22_exp_02.tif:0529-0175	10.6322
300	Control_7_exp_01.tif:0302-0070	68.6645		300	Control_22_exp_02.tif:0536-0167	25.2345
301	Control_7_exp_01.tif:0302-0074	25.7707		301	Control_22_exp_02.tif:0532-0159	18.3602
302	Control_7_exp_01.tif:0240-0041	26.7004		302	Control_22_exp_02.tif:0533-0138	27.537
303	Control_7_exp_01.tif:0229-0034	43.4283		303	Control_22_exp_02.tif:0523-0102	35.8981
304	Control_7_exp_01.tif:0200-0026	40.1881		304	Control_22_exp_02.tif:0516-0085	39.6145
305	Control_7_exp_01.tif:0176-0033	48.6144		305	Control_22_exp_02.tif:0491-0066	33.9529
306	Control_7_exp_01.tif:0177-0036	39.6367		306	Control_22_exp_02.tif:0472-0065	12.5748
307	Control_7_exp_01.tif:0163-0054	20.1397		307	Control_22_exp_02.tif:0451-0051	22.9435
308	Control_7_exp_01.tif:0095-0086	45.6789		308	Control_22_exp_02.tif:0432-0052	18.6251
309	Control_7_exp_01.tif:0089-0105	22.2185		309	Control_22_exp_02.tif:0413-0044	34.0774
310	Control_7_exp_01.tif:0072-0122	51.817		310	Control_22_exp_02.tif:0395-0050	21.3415
311	Control_7_exp_01.tif:0075-0166	14.1417		311	Control_22_exp_02.tif:0388-0054	18.1782
312	Control_7_exp_00.tif:0262-0203	1104.8		312	Control_22_exp_02.tif:0376-0061	11.8869
313	Control_7_exp_00.tif:0067-0200	28.8477		313	Control_22_exp_02.tif:0366-0068	35.3026
314	Control_7_exp_00.tif:0068-0217	35.5632		314	Control_22_exp_02.tif:0348-0066	13.2103
315	Control_7_exp_00.tif:0073-0237	23.0517		315	Control_22_exp_02.tif:0339-0072	38.7582
316	Control_7_exp_00.tif:0062-0248	43.418		316	Control_22_exp_02.tif:0321-0109	21.2781
317	Control_7_exp_00.tif:0098-0297	11.6906		317	Control_22_exp_02.tif:0298-0124	59.1674
318	Control_7_exp_00.tif:0119-0338	69.2337		318	Control_22_exp_02.tif:0300-0136	41.7335
319	Control_7_exp_00.tif:0147-0362	73.4569		319	Control_22_exp_02.tif:0308-0149	27.8904
320	Control_7_exp_00.tif:0152-0365	47.0052		320	Control_22_exp_02.tif:0332-0092	25.1218
321	Control_7_exp_00.tif:0247-0385	29.8199		321	Control_22_exp_02.tif:0136-0465	600.539
322	Control_7_exp_00.tif:0242-0397	58.6393		322	Control_22_exp_02.tif:0028-0473	27.8286
323	Control_7_exp_00.tif:0274-0388	28.1587		323	Control_22_exp_02.tif:0030-0487	39.4424
324	Control_7_exp_00.tif:0278-0386	35.2926		324	Control_22_exp_02.tif:0028-0487	33.0954
325	Control_7_exp_00.tif:0294-0382	17.2057		325	Control_22_exp_02.tif:0028-0504	39.6207
326	Control_7_exp_00.tif:0323-0378	31.2588		326	Control_22_exp_02.tif:0040-0516	33.8932
327	Control_7_exp_00.tif:0319-0379	39.2458		327	Control_22_exp_02.tif:0051-0527	38.1636
328	Control_7_exp_00.tif:0401-0350	76.5343		328	Control_22_exp_02.tif:0050-0540	49.6525
329	Control_7_exp_00.tif:0386-0373	78.8586		329	Control_22_exp_02.tif:0073-0554	22.4512
330	Control_7_exp_00.tif:0410-0333	39.5658		330	Control_22_exp_02.tif:0094-0569	34.6339
331	Control_7_exp_00.tif:0431-0317	49.4994		331	Control_22_exp_02.tif:0109-0573	39.5846
332	Control_7_exp_00.tif:0450-0298	53.8388		332	Control_22_exp_02.tif:0131-0575	23.3622
333	Control_7_exp_00.tif:0453-0224	15.2141		333	Control_22_exp_02.tif:0141-0578	31.1735
334	Control_7_exp_00.tif:0449-0228	13.074		334	Control_22_exp_02.tif:0168-0567	17.5445
335	Control_7_exp_00.tif:0456-0230	31.5965		335	Control_22_exp_02.tif:0179-0562	25.4335
336	Control_7_exp_00.tif:0463-0212	32.4907		336	Control_22_exp_02.tif:0222-0553	31.5197
337	Control_7_exp_00.tif:0463-0195	49.9673		337	Control_22_exp_02.tif:0226-0546	30.2541
338	Control_7_exp_00.tif:0457-0160	48.6871		338	Control_22_exp_02.tif:0232-0515	18.3471
339	Control_7_exp_00.tif:0440-0143	52.4662		339	Control_22_exp_02.tif:0240-0509	27.905
340	Control_7_exp_00.tif:0445-0136	42.5001		340	Control_22_exp_02.tif:0239-0491	21.5661
341	Control_7_exp_00.tif:0456-0142	55.202		341	Control_22_exp_02.tif:0240-0477	16.8995
342	Control_7_exp_00.tif:0420-0117	11.0557		342	Control_22_exp_02.tif:0242-0448	32.906
343	Control_7_exp_00.tif:0412-0100	17.0285		343	Control_22_exp_02.tif:0241-0440	25.4035
344	Control_7_exp_00.tif:0402-0076	28.2893		344	Control_22_exp_02.tif:0238-0430	20.2249
345	Control_7_exp_00.tif:0378-0057	65.4281		345	Control_22_exp_02.tif:0226-0391	37.6772
346	Control_7_exp_00.tif:0365-0055	23.1298		346	Control_22_exp_02.tif:0201-0380	14.0739
347	Control_7_exp_00.tif:0376-0057	36.8233		347	Control_22_exp_02.tif:0182-0366	25.5211
348	Control_7_exp_00.tif:0323-0029	51.6125		348	Control_22_exp_02.tif:0164-0356	35.9585
349	Control_7_exp_00.tif:0313-0032	20.1195		349	Control_22_exp_02.tif:0153-0359	19.5607
350	Control_7_exp_00.tif:0277-0037	27.8818		350	Control_22_exp_02.tif:0123-0359	12.638
351	Control_7_exp_00.tif:0271-0034	32.5524		351	Control_22_exp_02.tif:0103-0361	23.5495
352	Control_7_exp_00.tif:0256-0034	28.0797		352	Control_22_exp_02.tif:0095-0370	18.0661
353	Control_7_exp_00.tif:0246-0040	37.2802		353	Control_22_exp_02.tif:0056-0383	35.3392
354	Control_7_exp_00.tif:0234-0034	40.4176		354	Control_22_exp_02.tif:0047-0406	23.2604
355	Control_7_exp_00.tif:0185-0057	27.5872		355	Control_22_exp_02.tif:0041-0420	18.9086
356	Control_7_exp_00.tif:0166-0065	17.9729		356	Control_22_exp_02.tif:0027-0430	40.1668
357	Control_7_exp_00.tif:0121-0076	46.4258		357	Control_22_exp_02.tif:0035-0448	16.6086
358	Control_7_exp_00.tif:0120-0073	55.0532		358	Control_22_exp_02.tif:0039-0465	16.0731
359	Control_7_exp_00.tif:0120-0105	27.1977		359	Control_22_exp_02.tif:0028-0475	31.8638
360	Control_7_exp_00.tif:0091-0112	38.6407		360	Control_22_exp_02.tif:0028-0489	36.3262
361	Control_7_exp_00.tif:0091-0124	36.7677		361	Control_22_exp_02.tif:0030-0489	42.1946
362	Control_7_exp_00.tif:0080-0137	35.9223		362	Control_22_exp_01.tif:0187-0142	669.653
363	Control_7_exp_00.tif:0070-0172	24.9454		363	Control_22_exp_01.tif:0075-0143	19.9064
364	Control_7_exp_00.tif:0077-0166	15.3285		364	Control_22_exp_01.tif:0078-0159	16.7441
365	Control_7_exp_00.tif:0066-0201	28.3511		365	Control_22_exp_01.tif:0085-0187	17.1347
366	Control_7_exp_14.tif:0196-0200	781.401		366	Control_22_exp_01.tif:0143-0247	10.3513
367	Control_7_exp_14.tif:0063-0199	18.5526		367	Control_22_exp_01.tif:0292-0181	13.2686
368	Control_7_exp_14.tif:0052-0221	42.5953		368	Control_22_exp_01.tif:0293-0103	12.1395
369	Control_7_exp_14.tif:0068-0241	18.1156		369	Control_22_exp_01.tif:0281-0083	7.60285
370	Control_7_exp_14.tif:0070-0258	22.0484		370	Control_22_exp_01.tif:0141-0038	10.3094
371	Control_7_exp_14.tif:0080-0273	18.243		371	Control_22_exp_01.tif:0073-0119	18.0822
372	Control_7_exp_14.tif:0085-0281	30.9216		372	Control_22_exp_00.tif:0168-0151	625.679
373	Control_7_exp_14.tif:0101-0303	26.6948		373	Control_22_exp_00.tif:0054-0163	30.1766
374	Control_7_exp_14.tif:0123-0320	29.9945		374	Control_22_exp_00.tif:0059-0190	27.1422
375	Control_7_exp_14.tif:0143-0333	36.1441		375	Control_22_exp_00.tif:0067-0202	26.6281
376	Control_7_exp_14.tif:0163-0335	23.4237		376	Control_22_exp_00.tif:0071-0229	17.3596
377	Control_7_exp_14.tif:0175-0331	29.5257		377	Control_22_exp_00.tif:0089-0240	26.931
378	Control_7_exp_14.tif:0185-0331	20.2835		378	Control_22_exp_00.tif:0158-0264	24.7061
379	Control_7_exp_14.tif:0208-0331	22.9795		379	Control_22_exp_00.tif:0182-0268	12.0455
380	Control_7_exp_14.tif:0212-0334	43.7849		380	Control_22_exp_00.tif:0213-0263	37.231
381	Control_7_exp_14.tif:0224-0332	32.4111		381	Control_22_exp_00.tif:0209-0264	29.5337
382	Control_7_exp_14.tif:0253-0332	40.0339		382	Control_22_exp_00.tif:0232-0255	23.88
383	Control_7_exp_14.tif:0250-0330	51.7553		383	Control_22_exp_00.tif:0246-0243	21.2899
384	Control_7_exp_14.tif:0279-0299	23.3248		384	Control_22_exp_00.tif:0274-0218	32.0072
385	Control_7_exp_14.tif:0281-0301	29.8211		385	Control_22_exp_00.tif:0267-0085	14.8851
386	Control_7_exp_14.tif:0300-0282	22.4627		386	Control_22_exp_00.tif:0260-0069	31.8133
387	Control_7_exp_14.tif:0313-0268	18.3554		387	Control_22_exp_00.tif:0241-0048	17.7768
388	Control_7_exp_14.tif:0321-0254	34.1257		388	Control_22_exp_00.tif:0218-0047	45.0367
389	Control_7_exp_14.tif:0321-0235	21.457		389	Control_22_exp_00.tif:0181-0031	41.7286
390	Control_7_exp_14.tif:0326-0227	25.7402		390	Control_22_exp_00.tif:0180-0036	22.5877
391	Control_7_exp_14.tif:0329-0202	10.8506		391	Control_22_exp_00.tif:0129-0037	38.7637
392	Control_7_exp_14.tif:0330-0180	23.4966		392	Control_22_exp_00.tif:0155-0035	27.9309
393	Control_7_exp_14.tif:0323-0144	26.6329		393	Control_22_exp_00.tif:0115-0048	29.7413
394	Control_7_exp_14.tif:0312-0130	32.07		394	Control_22_exp_00.tif:0084-0086	19.5636
395	Control_7_exp_14.tif:0299-0114	34.624		395	Control_22_exp_00.tif:0067-0116	19.5608
396	Control_7_exp_14.tif:0292-0110	23.0817		396	Control_22_exp_00.tif:0064-0131	17.1144
397	Control_7_exp_14.tif:0275-0095	16.3752		397	Control_22_exp_00.tif:0057-0161	12.3283
398	Control_7_exp_14.tif:0263-0089	16.6327		398	Control_22_exp_00.tif:0532-0223	852.712
399	Control_7_exp_14.tif:0233-0076	16.8397		399	Control_22_exp_00.tif:0413-0123	16.8328
400	Control_7_exp_14.tif:0223-0071	12.8797		400	Control_22_exp_00.tif:0399-0136	21.125
401	Control_7_exp_14.tif:0205-0067	13.7149		401	Control_22_exp_00.tif:0375-0166	27.7931
402	Control_7_exp_14.tif:0198-0067	11.7169		402	Control_22_exp_00.tif:0376-0179	17.6691
403	Control_7_exp_14.tif:0185-0066	23.8626		403	Control_22_exp_00.tif:0371-0204	14.6537
404	Control_7_exp_14.tif:0145-0079	15.8976		404	Control_22_exp_00.tif:0369-0230	24.0948
405	Control_7_exp_14.tif:0126-0076	32.1134		405	Control_22_exp_00.tif:0374-0252	14.6632
406	Control_7_exp_14.tif:0123-0090	11.3831		406	Control_22_exp_00.tif:0376-0273	14.2208
407	Control_7_exp_14.tif:0090-0098	36.4705		407	Control_22_exp_00.tif:0392-0298	23.792
408	Control_7_exp_14.tif:0081-0109	19.8713		408	Control_22_exp_00.tif:0452-0348	18.2724
409	Control_7_exp_14.tif:0077-0119	31.5328		409	Control_22_exp_00.tif:0537-0354	8.25005
410	Control_7_exp_14.tif:0071-0134	21.6662		410	Control_22_exp_00.tif:0428-0328	16.1157
411	Control_7_exp_14.tif:0063-0155	20.2978		411	Control_22_exp_00.tif:0636-0316	8.28115
412	Control_7_exp_14.tif:0057-0166	22.2475		412	Control_22_exp_00.tif:0624-0324	14.9816
413	Control_7_exp_14.tif:0061-0181	16.7478		413	Control_22_exp_00.tif:0666-0275	10.3911
414	Control_7_exp_14.tif:0435-0548	712.83		414	Control_22_exp_00.tif:0676-0243	9.63007
415	Control_7_exp_14.tif:0566-0486	30.0354		415	Control_22_exp_00.tif:0677-0223	8.06226
416	Control_7_exp_14.tif:0560-0448	58.8431		416	Control_22_exp_00.tif:0681-0205	8.09248
417	Control_7_exp_14.tif:0529-0424	33.5891		417	Control_22_exp_00.tif:0534-0086	15.6179
418	Control_7_exp_14.tif:0471-0404	25.6833		418	Control_22_exp_00.tif:0509-0357	16.1364
419	Control_7_exp_14.tif:0460-0401	27.6439		419	Control_22_exp_00.tif:0577-0543	669.948
420	Control_7_exp_14.tif:0434-0397	24.6639		420	Control_22_exp_00.tif:0464-0556	21.9439
421	Control_7_exp_14.tif:0422-0404	13.9769		421	Control_22_exp_00.tif:0459-0568	24.9977
422	Control_7_exp_14.tif:0400-0399	27.4063		422	Control_22_exp_00.tif:0481-0613	19.2155
423	Control_7_exp_14.tif:0377-0423	19.019		423	Control_22_exp_00.tif:0525-0645	16.7917
424	Control_7_exp_14.tif:0343-0447	19.0372		424	Control_22_exp_00.tif:0498-0640	11.9432
425	Control_7_exp_14.tif:0325-0456	35.7561		425	Control_22_exp_00.tif:0480-0613	24.9153
426	Control_7_exp_14.tif:0311-0492	17.8272		426	Control_22_exp_00.tif:0585-0656	20.2118
427	Control_7_exp_14.tif:0311-0502	18.3087		427	Control_22_exp_00.tif:0607-0649	15.9944
428	Control_7_exp_14.tif:0287-0516	57.9384		428	Control_22_exp_00.tif:0652-0631	26.3485
429	Control_7_exp_14.tif:0300-0547	18.2559		429	Control_22_exp_00.tif:0662-0615	10.7412
430	Control_7_exp_14.tif:0286-0562	44.6716		430	Control_22_exp_00.tif:0669-0603	12.7593
431	Control_7_exp_14.tif:0302-0571	26.6385		431	Control_22_exp_00.tif:0683-0584	12.4568
432	Control_7_exp_14.tif:0303-0591	31.075		432	Control_22_exp_00.tif:0694-0570	16.1904
433	Control_7_exp_14.tif:0299-0636	59.4457		433	Control_22_exp_00.tif:0689-0531	8.97226
434	Control_7_exp_14.tif:0325-0651	33.5172		434	Control_22_exp_00.tif:0677-0497	12.9496
435	Control_7_exp_14.tif:0333-0668	38.8779		435	Control_22_exp_00.tif:0673-0485	14.9237
436	Control_7_exp_14.tif:0346-0671	31.3638		436	Control_22_exp_00.tif:0638-0454	16.604
437	Control_7_exp_14.tif:0367-0678	11.2287		437	Control_22_exp_00.tif:0580-0438	20.7308
438	Control_7_exp_14.tif:0379-0683	18.1893		438	Control_22_exp_00.tif:0563-0438	20.1832
439	Control_7_exp_14.tif:0399-0705	36.3945		439	Control_22_exp_00.tif:0552-0438	16.8711
440	Control_7_exp_14.tif:0427-0705	39.3024		440	Control_22_exp_00.tif:0538-0434	22.1168
441	Control_7_exp_14.tif:0443-0704	22.1345		441	Control_22_exp_00.tif:0510-0456	9.21954
442	Control_7_exp_14.tif:0463-0692	16.9883		442	Control_22_exp_00.tif:0483-0484	14.3473
443	Control_7_exp_14.tif:0502-0695	29.9002		443	Control_22_exp_00.tif:0471-0498	17.9624
444	Control_7_exp_14.tif:0525-0685	40.0245		444	Control_22_exp_00.tif:0221-0664	685.794
445	Control_7_exp_14.tif:0554-0649	52.102		445	Control_22_exp_00.tif:0099-0662	24.4005
446	Control_7_exp_14.tif:0557-0647	29.822		446	Control_22_exp_00.tif:0104-0691	14.5807
447	Control_7_exp_14.tif:0556-0634	20.3448		447	Control_22_exp_00.tif:0116-0728	25.0492
448	Control_7_exp_14.tif:0668-0568	526.742		448	Control_22_exp_00.tif:0154-0767	20.0691
449	Control_7_exp_14.tif:0572-0657	35.8555		449	Control_22_exp_00.tif:0216-0799	31.6369
450	Control_7_exp_14.tif:0647-0703	52.1565		450	Control_22_exp_00.tif:0244-0800	43.9189
451	Control_7_exp_14.tif:0759-0487	53.6864		451	Control_22_exp_00.tif:0294-0767	13.5865
452	Control_7_exp_14.tif:0753-0486	66.1974		452	Control_22_exp_00.tif:0353-0701	20.5805
453	Control_7_exp_14.tif:0661-0445	36.2414		453	Control_22_exp_00.tif:0351-0668	32.1798
454	Control_7_exp_14.tif:0653-0449	28.9701		454	Control_22_exp_00.tif:0346-0639	13.8849
455	Control_7_exp_14.tif:0625-0456	22.0476		455	Control_22_exp_00.tif:0260-0547	27.9199
456	Control_7_exp_14.tif:0609-0459	26.2553		456	Control_22_exp_00.tif:0205-0539	35.6367
457	Control_7_exp_14.tif:0577-0488	28.6007		457	Control_22_exp_00.tif:0166-0572	15.3445
458	Control_7_exp_14.tif:0610-0198	596.359		458	Control_22_exp_00.tif:0117-0700	13.786
459	Control_7_exp_14.tif:0506-0226	24.219		459	Control_22_exp_00.tif:0342-0634	12.2826
460	Control_7_exp_14.tif:0511-0242	19.8247		460	Control_22_exp_14.tif:0160-0187	587.207
461	Control_7_exp_14.tif:0526-0269	17.3888		461	Control_22_exp_14.tif:0061-0199	12.4755
462	Control_7_exp_14.tif:0546-0291	46.6394		462	Control_22_exp_14.tif:0063-0224	17.586
463	Control_7_exp_14.tif:0565-0300	27.2501		463	Control_22_exp_14.tif:0075-0232	9.37288
464	Control_7_exp_14.tif:0602-0309	20.7577		464	Control_22_exp_14.tif:0084-0247	11.0333
465	Control_7_exp_14.tif:0638-0304	40.8169		465	Control_22_exp_14.tif:0086-0256	14.3962
466	Control_7_exp_14.tif:0626-0305	24.4793		466	Control_22_exp_14.tif:0100-0280	32.0373
467	Control_7_exp_14.tif:0655-0299	34.7907		467	Control_22_exp_14.tif:0111-0281	17.5132
468	Control_7_exp_14.tif:0661-0287	11.5773		468	Control_22_exp_14.tif:0131-0283	10.6351
469	Control_7_exp_14.tif:0681-0282	24.0846		469	Control_22_exp_14.tif:0147-0289	15.5128
470	Control_7_exp_14.tif:0714-0253	47.9085		470	Control_22_exp_14.tif:0169-0292	16.119
471	Control_7_exp_14.tif:0705-0242	17.7688		471	Control_22_exp_14.tif:0195-0287	22.4714
472	Control_7_exp_14.tif:0727-0227	47.5876		472	Control_22_exp_14.tif:0207-0275	9.05539
473	Control_7_exp_14.tif:0719-0197	20.4672		473	Control_22_exp_14.tif:0223-0268	11.0499
474	Control_7_exp_14.tif:0705-0167	20.021		474	Control_22_exp_14.tif:0229-0265	10.8086
475	Control_7_exp_14.tif:0708-0124	48.2335		475	Control_22_exp_14.tif:0243-0248	14.0098
476	Control_7_exp_14.tif:0703-0135	33.7688		476	Control_22_exp_14.tif:0264-0212	16.057
477	Control_7_exp_14.tif:0688-0121	38.2664		477	Control_22_exp_14.tif:0269-0203	22.6004
478	Control_7_exp_14.tif:0614-0095	16.6216		478	Control_22_exp_14.tif:0265-0176	15.8865
479	Control_7_exp_14.tif:0591-0100	14.1796		479	Control_22_exp_14.tif:0248-0121	23.4946
480	Control_7_exp_14.tif:0572-0103	10.3114		480	Control_22_exp_14.tif:0221-0101	19.0251
481	Control_7_exp_14.tif:0538-0133	11.2642		481	Control_22_exp_14.tif:0195-0088	9.39415
482	Control_7_exp_13.tif:0196-0779	782.36		482	Control_22_exp_14.tif:0172-0085	6.99056
483	Control_7_exp_13.tif:0051-0755	45.8095		483	Control_22_exp_14.tif:0145-0088	21.6735
484	Control_7_exp_13.tif:0053-0762	29.4992		484	Control_22_exp_14.tif:0129-0093	9.51638
485	Control_7_exp_13.tif:0046-0770	56.5593		485	Control_22_exp_14.tif:0111-0100	15.2143
486	Control_7_exp_13.tif:0046-0820	63.2457		486	Control_22_exp_14.tif:0119-0098	7.65563
487	Control_7_exp_13.tif:0060-0825	37.3657		487	Control_22_exp_14.tif:0094-0110	15.2776
488	Control_7_exp_13.tif:0070-0834	13.0259		488	Control_22_exp_14.tif:0084-0123	14.951
489	Control_7_exp_13.tif:0067-0848	50.5637		489	Control_22_exp_14.tif:0061-0146	27.5586
490	Control_7_exp_13.tif:0064-0855	59.5049		490	Control_22_exp_14.tif:0074-0141	9.55303
491	Control_7_exp_13.tif:0088-0870	28.4595		491	Control_22_exp_14.tif:0058-0185	11.498
492	Control_7_exp_13.tif:0109-0907	90.2137		492	Control_22_exp_13.tif:0661-0460	568.138
493	Control_7_exp_13.tif:0185-0915	46.3339		493	Control_22_exp_13.tif:0547-0460	44.7414
494	Control_7_exp_13.tif:0205-0923	52.6935		494	Control_22_exp_13.tif:0556-0476	35.199
495	Control_7_exp_13.tif:0222-0932	54.17		495	Control_22_exp_13.tif:0561-0479	24.9362
496	Control_7_exp_13.tif:0227-0910	22.6316		496	Control_22_exp_13.tif:0551-0504	54.8713
497	Control_7_exp_13.tif:0253-0917	50.1197		497	Control_22_exp_13.tif:0566-0501	25.3689
498	Control_7_exp_13.tif:0246-0914	40.4071		498	Control_22_exp_13.tif:0569-0497	16.2637
499	Control_7_exp_13.tif:0290-0890	48.3534		499	Control_22_exp_13.tif:0580-0518	39.1859
500	Control_7_exp_13.tif:0282-0893	46.3447		500	Control_22_exp_13.tif:0596-0531	31.3118
501	Control_7_exp_13.tif:0300-0875	47.2983		501	Control_22_exp_13.tif:0603-0539	26.6625
502	Control_7_exp_13.tif:0313-0845	24.0285		502	Control_22_exp_13.tif:0598-0552	51.5435
503	Control_7_exp_13.tif:0329-0788	18.7634		503	Control_22_exp_13.tif:0638-0562	31.322
504	Control_7_exp_13.tif:0345-0768	43.0436		504	Control_22_exp_13.tif:0641-0561	35.2652
505	Control_7_exp_13.tif:0334-0765	41.6777		505	Control_22_exp_13.tif:0654-0557	23.6154
506	Control_7_exp_13.tif:0354-0744	69.8137		506	Control_22_exp_13.tif:0662-0567	28.3628
507	Control_7_exp_13.tif:0324-0728	21.4082		507	Control_22_exp_13.tif:0685-0562	33.1805
508	Control_7_exp_13.tif:0313-0709	29.2981		508	Control_22_exp_13.tif:0687-0577	53.2523
509	Control_7_exp_13.tif:0306-0690	27.8822		509	Control_22_exp_13.tif:0692-0561	25.0386
510	Control_7_exp_13.tif:0295-0688	23.6342		510	Control_22_exp_13.tif:0708-0562	39.2753
511	Control_7_exp_13.tif:0256-0644	64.5674		511	Control_22_exp_13.tif:0710-0553	18.9686
512	Control_7_exp_13.tif:0244-0650	39.7821		512	Control_22_exp_13.tif:0714-0548	18.1745
513	Control_7_exp_13.tif:0236-0645	53.3288		513	Control_22_exp_13.tif:0743-0546	56.1873
514	Control_7_exp_13.tif:0232-0635	62.9693		514	Control_22_exp_13.tif:0727-0540	18.999
515	Control_7_exp_13.tif:0194-0642	40.2505		515	Control_22_exp_13.tif:0767-0527	46.7707
516	Control_7_exp_13.tif:0190-0613	87.2366		516	Control_22_exp_13.tif:0759-0505	21.1955
517	Control_7_exp_13.tif:0182-0638	27.1904		517	Control_22_exp_13.tif:0758-0507	22.2612
518	Control_7_exp_13.tif:0153-0625	66.0721		518	Control_22_exp_13.tif:0763-0494	25.4305
519	Control_7_exp_13.tif:0119-0642	69.3989		519	Control_22_exp_13.tif:0770-0480	26.0208
520	Control_7_exp_13.tif:0126-0670	37.2397		520	Control_22_exp_13.tif:0766-0477	22.3802
521	Control_7_exp_13.tif:0106-0666	43.2396		521	Control_22_exp_13.tif:0774-0465	26.9133
522	Control_7_exp_13.tif:0098-0669	72.5776		522	Control_22_exp_13.tif:0778-0447	46.789
523	Control_7_exp_13.tif:0097-0674	26.4489		523	Control_22_exp_13.tif:0777-0446	35.6873
524	Control_7_exp_13.tif:0075-0698	24.0451		524	Control_22_exp_13.tif:0762-0434	13.3891
525	Control_7_exp_13.tif:0074-0715	21.5378		525	Control_22_exp_13.tif:0762-0416	20.6456
526	Control_7_exp_13.tif:0051-0752	43.7089		526	Control_22_exp_13.tif:0757-0412	19.1418
527	Control_7_exp_13.tif:0572-0294	623.656		527	Control_22_exp_13.tif:0754-0394	24.7421
528	Control_7_exp_13.tif:0468-0295	32.4861		528	Control_22_exp_13.tif:0753-0387	34.0225
529	Control_7_exp_13.tif:0462-0295	29.6381		529	Control_22_exp_13.tif:0743-0385	24.7217
530	Control_7_exp_13.tif:0466-0316	28.635		530	Control_22_exp_13.tif:0738-0381	26.4577
531	Control_7_exp_13.tif:0474-0338	12.0717		531	Control_22_exp_13.tif:0726-0368	23.349
532	Control_7_exp_13.tif:0481-0350	17.0627		532	Control_22_exp_13.tif:0718-0356	41.4794
533	Control_7_exp_13.tif:0483-0358	29.0542		533	Control_22_exp_13.tif:0707-0358	32.8883
534	Control_7_exp_13.tif:0488-0372	32.8301		534	Control_22_exp_13.tif:0693-0350	31.908
535	Control_7_exp_13.tif:0517-0384	21.822		535	Control_22_exp_13.tif:0684-0358	18.6384
536	Control_7_exp_13.tif:0524-0391	17.8799		536	Control_22_exp_13.tif:0656-0351	30.1713
537	Control_7_exp_13.tif:0546-0408	32.4261		537	Control_22_exp_13.tif:0643-0346	39.0128
538	Control_7_exp_13.tif:0576-0398	18.5742		538	Control_22_exp_13.tif:0632-0362	18.8763
539	Control_7_exp_13.tif:0577-0409	23.3928		539	Control_22_exp_13.tif:0626-0356	30.1687
540	Control_7_exp_13.tif:0634-0386	25.5193		540	Control_22_exp_13.tif:0614-0366	16.908
541	Control_7_exp_13.tif:0645-0375	24.7787		541	Control_22_exp_13.tif:0586-0372	49.9457
542	Control_7_exp_13.tif:0647-0366	14.231		542	Control_22_exp_13.tif:0601-0373	18.454
543	Control_7_exp_13.tif:0660-0356	30.6385		543	Control_22_exp_13.tif:0581-0384	28.6022
544	Control_7_exp_13.tif:0661-0348	29.0371		544	Control_22_exp_13.tif:0577-0395	25.5889
545	Control_7_exp_13.tif:0678-0328	31.1684		545	Control_22_exp_13.tif:0567-0414	38.1245
546	Control_7_exp_13.tif:0677-0314	18.8982		546	Control_22_exp_13.tif:0563-0433	27.6152
547	Control_7_exp_13.tif:0676-0298	11.9342		547	Control_22_exp_13.tif:0557-0433	42.3905
548	Control_7_exp_13.tif:0680-0280	21.0401		548	Control_22_exp_13.tif:0420-0698	687.012
549	Control_7_exp_13.tif:0680-0268	20.5714		549	Control_22_exp_13.tif:0298-0686	22.8962
550	Control_7_exp_13.tif:0673-0253	21.981		550	Control_22_exp_13.tif:0298-0692	28.9148
551	Control_7_exp_13.tif:0681-0240	50.1515		551	Control_22_exp_13.tif:0298-0701	26.3616
552	Control_7_exp_13.tif:0654-0224	13.8137		552	Control_22_exp_13.tif:0296-0711	25.2851
553	Control_7_exp_13.tif:0638-0210	17.1617		553	Control_22_exp_13.tif:0293-0724	41.3261
554	Control_7_exp_13.tif:0630-0202	28.7036		554	Control_22_exp_13.tif:0298-0732	37.4038
555	Control_7_exp_13.tif:0609-0199	13.1529		555	Control_22_exp_13.tif:0306-0738	21.7068
556	Control_7_exp_13.tif:0599-0190	28.3888		556	Control_22_exp_13.tif:0311-0749	15.7208
557	Control_7_exp_13.tif:0573-0191	16.133		557	Control_22_exp_13.tif:0301-0758	49.7564
558	Control_7_exp_13.tif:0566-0191	18.3723		558	Control_22_exp_13.tif:0317-0769	27.4873
559	Control_7_exp_13.tif:0556-0192	15.8679		559	Control_22_exp_13.tif:0305-0773	41.5874
560	Control_7_exp_13.tif:0541-0197	22.0427		560	Control_22_exp_13.tif:0329-0792	28.6844
561	Control_7_exp_13.tif:0518-0203	26.6962		561	Control_22_exp_13.tif:0349-0823	44.9076
562	Control_7_exp_13.tif:0507-0205	32.9383		562	Control_22_exp_13.tif:0332-0807	36.7937
563	Control_7_exp_13.tif:0534-0206	13.0421		563	Control_22_exp_13.tif:0368-0819	25.6561
564	Control_7_exp_13.tif:0493-0222	25.5357		564	Control_22_exp_13.tif:0368-0824	27.3908
565	Control_7_exp_13.tif:0485-0231	24.2433		565	Control_22_exp_13.tif:0379-0828	23.7548
566	Control_7_exp_13.tif:0477-0254	15.6514		566	Control_22_exp_13.tif:0385-0823	27.0417
567	Control_7_exp_13.tif:0485-0243	10.8525		567	Control_22_exp_13.tif:0395-0821	22.642
568	Control_7_exp_13.tif:0465-0265	31.0708		568	Control_22_exp_13.tif:0405-0832	37.4918
569	Control_7_exp_13.tif:0467-0293	27.4064		569	Control_22_exp_13.tif:0420-0823	29.5465
570	Control_7_exp_13.tif:0463-0291	36.1528		570	Control_22_exp_13.tif:0430-0841	41.1284
571	Control_7_exp_13.tif:0255-0150	619.925		571	Control_22_exp_13.tif:0442-0833	47.666
572	Control_7_exp_13.tif:0149-0125	45.9272		572	Control_22_exp_13.tif:0455-0829	35.2734
573	Control_7_exp_13.tif:0135-0170	37.1805		573	Control_22_exp_13.tif:0437-0825	24.1825
574	Control_7_exp_13.tif:0142-0205	37.9151		574	Control_22_exp_13.tif:0474-0814	21.861
575	Control_7_exp_13.tif:0160-0220	26.8335		575	Control_22_exp_13.tif:0463-0825	25.5414
576	Control_7_exp_13.tif:0162-0230	38.9286		576	Control_22_exp_13.tif:0491-0808	37.4523
577	Control_7_exp_13.tif:0177-0229	27.8604		577	Control_22_exp_13.tif:0513-0793	48.9735
578	Control_7_exp_13.tif:0186-0242	29.8959		578	Control_22_exp_13.tif:0504-0780	15.5014
579	Control_7_exp_13.tif:0218-0256	22.3081		579	Control_22_exp_13.tif:0522-0768	33.5996
580	Control_7_exp_13.tif:0235-0271	47.0664		580	Control_22_exp_13.tif:0521-0753	18.3595
581	Control_7_exp_13.tif:0237-0259	18.4804		581	Control_22_exp_13.tif:0520-0758	19.2125
582	Control_7_exp_13.tif:0267-0260	17.2043		582	Control_22_exp_13.tif:0534-0738	33.5807
583	Control_7_exp_13.tif:0281-0255	17.4747		583	Control_22_exp_13.tif:0531-0730	21.3631
584	Control_7_exp_13.tif:0293-0252	23.3246		584	Control_22_exp_13.tif:0547-0729	43.5028
585	Control_7_exp_13.tif:0310-0252	30.3284		585	Control_22_exp_13.tif:0543-0707	17.6334
586	Control_7_exp_13.tif:0330-0235	27.3501		586	Control_22_exp_13.tif:0548-0696	34.4593
587	Control_7_exp_13.tif:0344-0219	23.0613		587	Control_22_exp_13.tif:0548-0683	35.4938
588	Control_7_exp_13.tif:0344-0212	22.5382		588	Control_22_exp_13.tif:0545-0674	25.145
589	Control_7_exp_13.tif:0369-0173	15.8013		589	Control_22_exp_13.tif:0549-0655	40.7295
590	Control_7_exp_13.tif:0368-0141	17.1146		590	Control_22_exp_13.tif:0531-0639	30.7634
591	Control_7_exp_13.tif:0360-0116	11.088		591	Control_22_exp_13.tif:0532-0626	49.9762
592	Control_7_exp_13.tif:0358-0098	15.1008		592	Control_22_exp_13.tif:0509-0616	27.34
593	Control_7_exp_13.tif:0348-0087	11.3453		593	Control_22_exp_13.tif:0503-0610	22.808
594	Control_7_exp_13.tif:0340-0081	20.0047		594	Control_22_exp_13.tif:0473-0586	45.1397
595	Control_7_exp_13.tif:0319-0058	27.3843		595	Control_22_exp_13.tif:0459-0580	19.6177
596	Control_7_exp_13.tif:0298-0053	17.4032		596	Control_22_exp_13.tif:0432-0570	34.8248
597	Control_7_exp_13.tif:0290-0053	13.6366		597	Control_22_exp_13.tif:0428-0573	22.8495
598	Control_7_exp_13.tif:0270-0036	27.901		598	Control_22_exp_13.tif:0415-0578	29.7134
599	Control_7_exp_13.tif:0258-0037	34.4699		599	Control_22_exp_13.tif:0401-0583	24.0056
600	Control_7_exp_13.tif:0253-0039	33.1524		600	Control_22_exp_13.tif:0394-0576	45.8285
601	Control_7_exp_13.tif:0230-0045	12.0977		601	Control_22_exp_13.tif:0376-0581	35.5601
602	Control_7_exp_13.tif:0212-0041	14.4868		602	Control_22_exp_13.tif:0368-0587	29.9865
603	Control_7_exp_13.tif:0211-0049	42.8126		603	Control_22_exp_13.tif:0359-0595	24.6873
604	Control_7_exp_13.tif:0193-0058	23.8862		604	Control_22_exp_13.tif:0341-0596	38.9787
605	Control_7_exp_13.tif:0179-0065	26.6421		605	Control_22_exp_13.tif:0325-0615	31.0925
606	Control_7_exp_13.tif:0180-0070	23.4893		606	Control_22_exp_13.tif:0327-0618	47.2097
607	Control_7_exp_13.tif:0158-0084	19.8721		607	Control_22_exp_13.tif:0339-0608	32.1677
608	Control_7_exp_13.tif:0149-0091	34.3074		608	Control_22_exp_13.tif:0329-0631	13.7136
609	Control_7_exp_13.tif:0148-0118	31.3977		609	Control_22_exp_13.tif:0313-0639	32.2543
610	Control_7_exp_13.tif:0140-0138	14.5898		610	Control_22_exp_13.tif:0304-0643	47.3395
611	Control_7_exp_12.tif:0166-0297	734.642		611	Control_22_exp_13.tif:0307-0656	28.061
612	Control_7_exp_12.tif:0034-0284	47.6444		612	Control_22_exp_13.tif:0309-0672	13.8988
613	Control_7_exp_12.tif:0041-0290	29.6352		613	Control_22_exp_13.tif:0310-0680	13.4681
614	Control_7_exp_12.tif:0042-0307	22.6407		614	Control_22_exp_13.tif:0295-0686	29.991
615	Control_7_exp_12.tif:0041-0320	24.4367		615	Control_22_exp_12.tif:0142-0130	543.743
616	Control_7_exp_12.tif:0055-0364	30.6541		616	Control_22_exp_12.tif:0048-0126	15.5764
617	Control_7_exp_12.tif:0063-0374	36.8387		617	Control_22_exp_12.tif:0045-0156	33.213
618	Control_7_exp_12.tif:0087-0389	28.6787		618	Control_22_exp_12.tif:0053-0160	14.2962
619	Control_7_exp_12.tif:0104-0404	20.8944		619	Control_22_exp_12.tif:0058-0180	20.4839
620	Control_7_exp_12.tif:0111-0417	32.7512		620	Control_22_exp_12.tif:0066-0193	26.9411
621	Control_7_exp_12.tif:0137-0418	14.1578		621	Control_22_exp_12.tif:0086-0214	18.8112
622	Control_7_exp_12.tif:0169-0422	34.7556		622	Control_22_exp_12.tif:0119-0224	10.7711
623	Control_7_exp_12.tif:0163-0429	28.8571		623	Control_22_exp_12.tif:0136-0224	9.08303
624	Control_7_exp_12.tif:0195-0418	15.7968		624	Control_22_exp_12.tif:0146-0233	35.2736
625	Control_7_exp_12.tif:0216-0413	17.567		625	Control_22_exp_12.tif:0155-0225	17.1479
626	Control_7_exp_12.tif:0233-0405	16.4817		626	Control_22_exp_12.tif:0166-0230	24.1392
627	Control_7_exp_12.tif:0273-0385	30.1173		627	Control_22_exp_12.tif:0176-0228	26.6367
628	Control_7_exp_12.tif:0290-0341	32.2109		628	Control_22_exp_12.tif:0193-0208	10.2956
629	Control_7_exp_12.tif:0288-0318	14.4239		629	Control_22_exp_12.tif:0224-0182	20.1204
630	Control_7_exp_12.tif:0292-0306	14.5771		630	Control_22_exp_12.tif:0211-0195	10.9672
631	Control_7_exp_12.tif:0292-0278	15.1526		631	Control_22_exp_12.tif:0235-0134	8.62793
632	Control_7_exp_12.tif:0286-0255	19.0704		632	Control_22_exp_12.tif:0233-0110	9.31181
633	Control_7_exp_12.tif:0264-0218	15.3424		633	Control_22_exp_12.tif:0227-0094	9.17974
634	Control_7_exp_12.tif:0226-0181	20.8676		634	Control_22_exp_12.tif:0211-0063	8.94873
635	Control_7_exp_12.tif:0195-0165	30.0142		635	Control_22_exp_12.tif:0193-0052	7.30383
636	Control_7_exp_12.tif:0167-0170	11.1249		636	Control_22_exp_12.tif:0179-0040	17.6758
637	Control_7_exp_12.tif:0154-0173	12.7673		637	Control_22_exp_12.tif:0167-0038	9.91909
638	Control_7_exp_12.tif:0139-0169	21.3709		638	Control_22_exp_12.tif:0147-0037	9.12432
639	Control_7_exp_12.tif:0124-0178	16.6863		639	Control_22_exp_12.tif:0128-0033	24.3586
640	Control_7_exp_12.tif:0111-0188	14.1777		640	Control_22_exp_12.tif:0107-0043	9.19239
641	Control_7_exp_12.tif:0095-0196	28.0839		641	Control_22_exp_12.tif:0094-0049	10.3831
642	Control_7_exp_12.tif:0094-0204	11.6325		642	Control_22_exp_12.tif:0075-0046	30.8205
643	Control_7_exp_12.tif:0076-0214	15.8447		643	Control_22_exp_12.tif:0062-0073	20.0048
644	Control_7_exp_12.tif:0068-0219	16.9628		644	Control_22_exp_12.tif:0059-0089	13.08
645	Control_7_exp_12.tif:0058-0244	13.5501		645	Control_22_exp_12.tif:0051-0092	23.1953
646	Control_7_exp_12.tif:0050-0260	21.149		646	Control_22_exp_12.tif:0051-0107	8.33486
647	Control_7_exp_12.tif:0047-0271	17.1465		647	Control_22_exp_12.tif:0048-0126	12.458
648	Control_7_exp_12.tif:0482-0196	656.879		648	Control_22_exp_11.tif:0144-0150	598.508
649	Control_7_exp_12.tif:0358-0170	55.1027		649	Control_22_exp_11.tif:0033-0143	38.0253
650	Control_7_exp_12.tif:0362-0181	28.2719		650	Control_22_exp_11.tif:0039-0177	35.9154
651	Control_7_exp_12.tif:0367-0200	17.5816		651	Control_22_exp_11.tif:0046-0189	22.5044
652	Control_7_exp_12.tif:0364-0220	25.2938		652	Control_22_exp_11.tif:0050-0193	24.4291
653	Control_7_exp_12.tif:0367-0235	18.9547		653	Control_22_exp_11.tif:0060-0202	19.8421
654	Control_7_exp_12.tif:0371-0260	42.123		654	Control_22_exp_11.tif:0056-0217	35.0881
655	Control_7_exp_12.tif:0389-0277	31.0852		655	Control_22_exp_11.tif:0074-0238	27.092
656	Control_7_exp_12.tif:0438-0308	21.7691		656	Control_22_exp_11.tif:0081-0239	24.7407
657	Control_7_exp_12.tif:0464-0310	23.7989		657	Control_22_exp_11.tif:0093-0260	51.7453
658	Control_7_exp_12.tif:0468-0331	61.8543		658	Control_22_exp_11.tif:0109-0247	23.2192
659	Control_7_exp_12.tif:0493-0313	18.4366		659	Control_22_exp_11.tif:0116-0250	23.1488
660	Control_7_exp_12.tif:0511-0300	10.0173		660	Control_22_exp_11.tif:0123-0268	41.6633
661	Control_7_exp_12.tif:0553-0284	19.312		661	Control_22_exp_11.tif:0141-0261	24.9721
662	Control_7_exp_12.tif:0595-0251	27.9535		662	Control_22_exp_11.tif:0152-0260	18.4082
663	Control_7_exp_12.tif:0597-0244	25.7034		663	Control_22_exp_11.tif:0174-0261	28.419
664	Control_7_exp_12.tif:0598-0194	20.8719		664	Control_22_exp_11.tif:0187-0256	40.2681
665	Control_7_exp_12.tif:0603-0172	22.9155		665	Control_22_exp_11.tif:0204-0251	46.3756
666	Control_7_exp_12.tif:0582-0146	20.7748		666	Control_22_exp_11.tif:0204-0239	21.3092
667	Control_7_exp_12.tif:0583-0116	51.6763		667	Control_22_exp_11.tif:0219-0233	30.6678
668	Control_7_exp_12.tif:0542-0103	24.3902		668	Control_22_exp_11.tif:0237-0199	15.2153
669	Control_7_exp_12.tif:0534-0105	14.3101		669	Control_22_exp_11.tif:0247-0174	20.6412
670	Control_7_exp_12.tif:0524-0092	29.6758		670	Control_22_exp_11.tif:0246-0163	12.6587
671	Control_7_exp_12.tif:0509-0088	19.3461		671	Control_22_exp_11.tif:0263-0136	46.5528
672	Control_7_exp_12.tif:0439-0085	44.4826		672	Control_22_exp_11.tif:0247-0130	23.321
673	Control_7_exp_12.tif:0465-0091	8.38197		673	Control_22_exp_11.tif:0234-0104	28.991
674	Control_7_exp_12.tif:0403-0118	14.8043		674	Control_22_exp_11.tif:0236-0103	21.0212
675	Control_7_exp_12.tif:0391-0116	31.8545		675	Control_22_exp_11.tif:0231-0084	27.2522
676	Control_7_exp_12.tif:0387-0130	17.9632		676	Control_22_exp_11.tif:0206-0072	15.0732
677	Control_7_exp_12.tif:0369-0142	45.0127		677	Control_22_exp_11.tif:0187-0045	36.8502
678	Control_7_exp_12.tif:0358-0170	52.6253		678	Control_22_exp_11.tif:0156-0046	27.3053
679	Control_7_exp_12.tif:0363-0182	34.3862		679	Control_22_exp_11.tif:0146-0043	20.4794
680	Control_7_exp_12.tif:0368-0199	18.5261		680	Control_22_exp_11.tif:0152-0039	27.2288
681	Control_7_exp_11.tif:0224-0532	1082.15		681	Control_22_exp_11.tif:0128-0046	17.8124
682	Control_7_exp_11.tif:0041-0514	30.8789		682	Control_22_exp_11.tif:0118-0048	19.7765
683	Control_7_exp_11.tif:0041-0546	30.9862		683	Control_22_exp_11.tif:0103-0048	27.8684
684	Control_7_exp_11.tif:0047-0557	19.1712		684	Control_22_exp_11.tif:0100-0056	20.6586
685	Control_7_exp_11.tif:0054-0589	31.2702		685	Control_22_exp_11.tif:0085-0070	11.1744
686	Control_7_exp_11.tif:0065-0615	25.4907		686	Control_22_exp_11.tif:0069-0067	29.7113
687	Control_7_exp_11.tif:0081-0637	12.8331		687	Control_22_exp_11.tif:0068-0081	12.0616
688	Control_7_exp_11.tif:0098-0656	19.3756		688	Control_22_exp_11.tif:0057-0092	19.5442
689	Control_7_exp_11.tif:0109-0670	26.2845		689	Control_22_exp_11.tif:0050-0102	16.3195
690	Control_7_exp_11.tif:0180-0731	44.0434		690	Control_22_exp_11.tif:0046-0108	21.8977
691	Control_7_exp_11.tif:0223-0719	29.1119		691	Control_22_exp_11.tif:0041-0118	31.8843
692	Control_7_exp_11.tif:0253-0709	21.2083		692	Control_22_exp_11.tif:0045-0127	32.3512
693	Control_7_exp_11.tif:0272-0705	21.4428		693	Control_22_exp_11.tif:0030-0143	34.9269
694	Control_7_exp_11.tif:0285-0704	27.9525		694	Control_22_exp_10.tif:0137-0127	553.624
695	Control_7_exp_11.tif:0298-0696	21.7907		695	Control_22_exp_10.tif:0039-0128	14.9892
696	Control_7_exp_11.tif:0320-0682	17.3034		696	Control_22_exp_10.tif:0040-0138	23.2758
697	Control_7_exp_11.tif:0339-0669	21.1616		697	Control_22_exp_10.tif:0050-0159	16.993
698	Control_7_exp_11.tif:0365-0650	22.3987		698	Control_22_exp_10.tif:0062-0178	12.2526
699	Control_7_exp_11.tif:0386-0624	19.225		699	Control_22_exp_10.tif:0097-0211	13.8095
700	Control_7_exp_11.tif:0401-0590	14		700	Control_22_exp_10.tif:0114-0219	26.1277
701	Control_7_exp_11.tif:0400-0562	11.2263		701	Control_22_exp_10.tif:0133-0234	28.0214
702	Control_7_exp_11.tif:0403-0549	12.8964		702	Control_22_exp_10.tif:0146-0229	14.9577
703	Control_7_exp_11.tif:0402-0511	11.2918		703	Control_22_exp_10.tif:0178-0221	22.1493
704	Control_7_exp_11.tif:0395-0474	11.5304		704	Control_22_exp_10.tif:0205-0199	11.7155
705	Control_7_exp_11.tif:0377-0435	18.6332		705	Control_22_exp_10.tif:0193-0205	7.77817
706	Control_7_exp_11.tif:0355-0405	23.3905		706	Control_22_exp_10.tif:0210-0188	9.23138
707	Control_7_exp_11.tif:0318-0376	15.9273		707	Control_22_exp_10.tif:0223-0177	20.2521
708	Control_7_exp_11.tif:0286-0362	15		708	Control_22_exp_10.tif:0232-0144	8.87738
709	Control_7_exp_11.tif:0259-0358	22.4559		709	Control_22_exp_10.tif:0230-0092	12.9528
710	Control_7_exp_11.tif:0249-0359	15.2315		710	Control_22_exp_10.tif:0216-0065	16.9142
711	Control_7_exp_11.tif:0228-0361	12.4765		711	Control_22_exp_10.tif:0198-0054	8.67885
712	Control_7_exp_11.tif:0194-0360	24.5571		712	Control_22_exp_10.tif:0205-0061	8.1831
713	Control_7_exp_11.tif:0172-0377	16.6446		713	Control_22_exp_10.tif:0173-0038	8.11078
714	Control_7_exp_11.tif:0103-0418	13.9112		714	Control_22_exp_10.tif:0157-0026	20.2361
715	Control_7_exp_11.tif:0073-0444	29.356		715	Control_22_exp_10.tif:0146-0031	9.13228
716	Control_7_exp_11.tif:0073-0461	12.4411		716	Control_22_exp_10.tif:0131-0032	8.36048
717	Control_7_exp_11.tif:0058-0483	17.4635		717	Control_22_exp_10.tif:0124-0035	8.11877
718	Control_7_exp_11.tif:0056-0496	10.6431		718	Control_22_exp_10.tif:0106-0041	7.0695
719	Control_7_exp_11.tif:0042-0516	28.3522		719	Control_22_exp_10.tif:0088-0047	15.7532
720	Control_7_exp_11.tif:0042-0547	33.8569		720	Control_22_exp_10.tif:0064-0071	7.07107
721	Control_7_exp_11.tif:0574-0756	876.402		721	Control_22_exp_10.tif:0059-0078	12.1853
722	Control_7_exp_11.tif:0417-0679	64.2268		722	Control_22_exp_10.tif:0052-0090	11.4179
723	Control_7_exp_11.tif:0548-0912	36.667		723	Control_22_exp_10.tif:0047-0120	11.3584
724	Control_7_exp_11.tif:0601-0927	42.4737		724	Control_22_exp_09.tif:0171-0166	635.389
725	Control_7_exp_11.tif:0616-0921	53.9005		725	Control_22_exp_09.tif:0057-0162	23.3229
726	Control_7_exp_11.tif:0699-0855	33.7687		726	Control_22_exp_09.tif:0056-0173	39.1289
727	Control_7_exp_11.tif:0667-0880	28.409		727	Control_22_exp_09.tif:0065-0194	16.0696
728	Control_7_exp_11.tif:0491-0877	17.133		728	Control_22_exp_09.tif:0071-0220	15.6939
729	Control_7_exp_11.tif:0703-0850	22.9111		729	Control_22_exp_09.tif:0071-0234	34.2641
730	Control_7_exp_11.tif:0545-0250	648.642		730	Control_22_exp_09.tif:0080-0242	25.744
731	Control_7_exp_11.tif:0644-0320	21.635		731	Control_22_exp_09.tif:0087-0245	23.7219
732	Control_7_exp_11.tif:0626-0347	28.9224		732	Control_22_exp_09.tif:0104-0258	18.2412
733	Control_7_exp_11.tif:0658-0290	22.0217		733	Control_22_exp_09.tif:0111-0261	12.2334
734	Control_7_exp_11.tif:0665-0253	25.4045		734	Control_22_exp_09.tif:0137-0288	42.7236
735	Control_7_exp_11.tif:0663-0217	27.2543		735	Control_22_exp_09.tif:0154-0278	19.5352
736	Control_7_exp_11.tif:0640-0174	19.8028		736	Control_22_exp_09.tif:0161-0286	38.3356
737	Control_7_exp_11.tif:0585-0145	14.5302		737	Control_22_exp_09.tif:0172-0279	16.0056
738	Control_7_exp_11.tif:0565-0140	19.1623		738	Control_22_exp_09.tif:0212-0282	39.1742
739	Control_7_exp_11.tif:0545-0133	30.434		739	Control_22_exp_09.tif:0206-0285	37.1233
740	Control_7_exp_11.tif:0477-0165	22.2523		740	Control_22_exp_09.tif:0189-0279	14.4298
741	Control_7_exp_11.tif:0465-0178	23.5335		741	Control_22_exp_09.tif:0228-0274	34.558
742	Control_7_exp_11.tif:0453-0308	23.0285		742	Control_22_exp_09.tif:0238-0267	21.4595
743	Control_7_exp_11.tif:0472-0332	24.1418		743	Control_22_exp_09.tif:0246-0259	20.7208
744	Control_7_exp_11.tif:0512-0362	15.746		744	Control_22_exp_09.tif:0254-0249	18.5868
745	Control_7_exp_11.tif:0300-0179	776.163		745	Control_22_exp_09.tif:0259-0237	12.4843
746	Control_7_exp_11.tif:0177-0134	13.9745		746	Control_22_exp_09.tif:0268-0219	8.5498
747	Control_7_exp_11.tif:0171-0141	17.2091		747	Control_22_exp_09.tif:0268-0223	8.74643
748	Control_7_exp_11.tif:0170-0155	14.8283		748	Control_22_exp_09.tif:0284-0196	16.2992
749	Control_7_exp_11.tif:0166-0168	22.2699		749	Control_22_exp_09.tif:0291-0166	20.0836
750	Control_7_exp_11.tif:0162-0192	17.8982		750	Control_22_exp_09.tif:0297-0123	48.158
751	Control_7_exp_11.tif:0168-0213	21.8354		751	Control_22_exp_09.tif:0279-0088	53.7452
752	Control_7_exp_11.tif:0175-0229	15.3353		752	Control_22_exp_09.tif:0264-0080	36.6693
753	Control_7_exp_11.tif:0182-0243	18.4649		753	Control_22_exp_09.tif:0227-0072	20.3607
754	Control_7_exp_11.tif:0185-0265	22.4762		754	Control_22_exp_09.tif:0192-0068	13.7716
755	Control_7_exp_11.tif:0194-0273	19.9958		755	Control_22_exp_09.tif:0174-0060	20.469
756	Control_7_exp_11.tif:0201-0282	22.8504		756	Control_22_exp_09.tif:0159-0065	11.1574
757	Control_7_exp_11.tif:0218-0298	32.4111		757	Control_22_exp_09.tif:0130-0058	36.7836
758	Control_7_exp_11.tif:0275-0321	33.5444		758	Control_22_exp_09.tif:0128-0063	26.5213
759	Control_7_exp_11.tif:0298-0322	31.6236		759	Control_22_exp_09.tif:0103-0086	18.0134
760	Control_7_exp_11.tif:0311-0322	25.5654		760	Control_22_exp_09.tif:0086-0092	25.5613
761	Control_7_exp_11.tif:0320-0325	22.8799		761	Control_22_exp_09.tif:0072-0101	43.347
762	Control_7_exp_11.tif:0337-0311	18.6017		762	Control_22_exp_09.tif:0064-0128	33.9517
763	Control_7_exp_11.tif:0354-0307	24.513		763	Control_22_exp_09.tif:0064-0140	23.1815
764	Control_7_exp_11.tif:0381-0285	17.1449		764	Control_22_exp_09.tif:0065-0149	18.8701
765	Control_7_exp_11.tif:0406-0271	21.3809		765	Control_22_exp_08.tif:0192-0120	450.546
766	Control_7_exp_11.tif:0410-0267	19.9363		766	Control_22_exp_08.tif:0104-0094	51.7171
767	Control_7_exp_11.tif:0419-0243	11.1979		767	Control_22_exp_08.tif:0110-0092	38.5929
768	Control_7_exp_11.tif:0446-0175	23.7418		768	Control_22_exp_08.tif:0116-0118	15.2078
769	Control_7_exp_11.tif:0437-0148	18.0421		769	Control_22_exp_08.tif:0112-0138	15.6536
770	Control_7_exp_11.tif:0425-0131	14.5543		770	Control_22_exp_08.tif:0119-0144	28.3295
771	Control_7_exp_11.tif:0362-0061	17.7502		771	Control_22_exp_08.tif:0113-0153	48.4421
772	Control_7_exp_11.tif:0410-0105	16.3927		772	Control_22_exp_08.tif:0096-0157	92.4464
773	Control_7_exp_11.tif:0319-0048	19.93		773	Control_22_exp_08.tif:0119-0175	37.8674
774	Control_7_exp_11.tif:0292-0047	11.4018		774	Control_22_exp_08.tif:0144-0190	28.0578
775	Control_7_exp_11.tif:0231-0062	32.5873		775	Control_22_exp_08.tif:0157-0197	22.2393
776	Control_7_exp_11.tif:0268-0052	17.1007		776	Control_22_exp_08.tif:0164-0207	24.5779
777	Control_7_exp_11.tif:0255-0056	11.4018		777	Control_22_exp_08.tif:0189-0211	25.4297
778	Control_7_exp_11.tif:0211-0078	20.9239		778	Control_22_exp_08.tif:0238-0200	24.5332
779	Control_7_exp_11.tif:0201-0085	17.0928		779	Control_22_exp_08.tif:0267-0169	38.9119
780	Control_7_exp_11.tif:0176-0135	13.295		780	Control_22_exp_08.tif:0266-0159	16.1768
781	Control_7_exp_11.tif:0172-0144	15.6554		781	Control_22_exp_08.tif:0274-0126	16.1742
782	Control_7_exp_11.tif:0170-0154	10.3011		782	Control_22_exp_08.tif:0288-0091	60.2162
783	Control_7_exp_10.tif:0224-0532	1082.15		783	Control_22_exp_08.tif:0277-0076	50.9749
784	Control_7_exp_10.tif:0041-0514	30.8789		784	Control_22_exp_08.tif:0258-0069	19.193
785	Control_7_exp_10.tif:0041-0546	30.9862		785	Control_22_exp_08.tif:0203-0038	22.8012
786	Control_7_exp_10.tif:0047-0557	19.1712		786	Control_22_exp_08.tif:0187-0030	35.0561
787	Control_7_exp_10.tif:0054-0589	31.2702		787	Control_22_exp_08.tif:0198-0039	27.9661
788	Control_7_exp_10.tif:0065-0615	25.4907		788	Control_22_exp_08.tif:0158-0039	35.4776
789	Control_7_exp_10.tif:0081-0637	12.8331		789	Control_22_exp_08.tif:0150-0040	63.8414
790	Control_7_exp_10.tif:0098-0656	19.3756		790	Control_22_exp_08.tif:0136-0061	14.3188
791	Control_7_exp_10.tif:0109-0670	26.2845		791	Control_22_exp_08.tif:0122-0065	38.062
792	Control_7_exp_10.tif:0180-0731	44.0434		792	Control_22_exp_08.tif:0124-0078	17.5079
793	Control_7_exp_10.tif:0223-0719	29.1119		793	Control_22_exp_08.tif:0112-0091	37.3182
794	Control_7_exp_10.tif:0253-0709	21.2083		794	Control_22_exp_08.tif:0102-0092	51.9545
795	Control_7_exp_10.tif:0272-0705	21.4428		795	Control_22_exp_08.tif:0164-0378	622.107
796	Control_7_exp_10.tif:0285-0704	27.9525		796	Control_22_exp_08.tif:0038-0380	59.5307
797	Control_7_exp_10.tif:0298-0696	21.7907		797	Control_22_exp_08.tif:0048-0381	46.5374
798	Control_7_exp_10.tif:0320-0682	17.3034		798	Control_22_exp_08.tif:0040-0416	76.0018
799	Control_7_exp_10.tif:0339-0669	21.1616		799	Control_22_exp_08.tif:0050-0418	56.7524
800	Control_7_exp_10.tif:0365-0650	22.3987		800	Control_22_exp_08.tif:0070-0436	35.981
801	Control_7_exp_10.tif:0386-0624	19.225		801	Control_22_exp_08.tif:0078-0461	54.5062
802	Control_7_exp_10.tif:0401-0590	14		802	Control_22_exp_08.tif:0080-0486	73.282
803	Control_7_exp_10.tif:0400-0562	11.2263		803	Control_22_exp_08.tif:0106-0480	40.0591
804	Control_7_exp_10.tif:0403-0549	12.8964		804	Control_22_exp_08.tif:0119-0488	56.4509
805	Control_7_exp_10.tif:0402-0511	11.2918		805	Control_22_exp_08.tif:0147-0503	72.8458
806	Control_7_exp_10.tif:0395-0474	11.5304		806	Control_22_exp_08.tif:0181-0493	30.5126
807	Control_7_exp_10.tif:0377-0435	18.6332		807	Control_22_exp_08.tif:0219-0495	46.678
808	Control_7_exp_10.tif:0355-0405	23.3905		808	Control_22_exp_08.tif:0234-0490	50.786
809	Control_7_exp_10.tif:0318-0376	15.9273		809	Control_22_exp_08.tif:0251-0475	54.0367
810	Control_7_exp_10.tif:0286-0362	15		810	Control_22_exp_08.tif:0254-0453	23.9129
811	Control_7_exp_10.tif:0259-0358	22.4559		811	Control_22_exp_08.tif:0297-0401	63.2874
812	Control_7_exp_10.tif:0249-0359	15.2315		812	Control_22_exp_08.tif:0281-0382	32.7827
813	Control_7_exp_10.tif:0228-0361	12.4765		813	Control_22_exp_08.tif:0268-0348	16.7163
814	Control_7_exp_10.tif:0194-0360	24.5571		814	Control_22_exp_08.tif:0257-0303	35.485
815	Control_7_exp_10.tif:0172-0377	16.6446		815	Control_22_exp_08.tif:0243-0307	20.2845
816	Control_7_exp_10.tif:0103-0418	13.9112		816	Control_22_exp_08.tif:0230-0289	39.6481
817	Control_7_exp_10.tif:0073-0444	29.356		817	Control_22_exp_08.tif:0229-0288	31.8362
818	Control_7_exp_10.tif:0073-0461	12.4411		818	Control_22_exp_08.tif:0189-0277	22.0525
819	Control_7_exp_10.tif:0058-0483	17.4635		819	Control_22_exp_08.tif:0166-0272	21.7675
820	Control_7_exp_10.tif:0056-0496	10.6431		820	Control_22_exp_08.tif:0139-0273	27.2625
821	Control_7_exp_10.tif:0042-0516	28.3522		821	Control_22_exp_08.tif:0119-0277	30.4213
822	Control_7_exp_10.tif:0042-0547	33.8569		822	Control_22_exp_08.tif:0110-0282	24.0254
823	Control_7_exp_10.tif:0574-0756	876.402		823	Control_22_exp_08.tif:0100-0290	28.5959
824	Control_7_exp_10.tif:0417-0679	64.2268		824	Control_22_exp_08.tif:0067-0283	87.8852
825	Control_7_exp_10.tif:0548-0912	36.667		825	Control_22_exp_08.tif:0075-0312	30.484
826	Control_7_exp_10.tif:0601-0927	42.4737		826	Control_22_exp_08.tif:0057-0312	49.1364
827	Control_7_exp_10.tif:0616-0921	53.9005		827	Control_22_exp_08.tif:0048-0319	73.0146
828	Control_7_exp_10.tif:0699-0855	33.7687		828	Control_22_exp_08.tif:0049-0340	52.1014
829	Control_7_exp_10.tif:0667-0880	28.409		829	Control_22_exp_08.tif:0067-0336	21.7514
830	Control_7_exp_10.tif:0491-0877	17.133
831	Control_7_exp_10.tif:0703-0850	22.9111
832	Control_7_exp_10.tif:0545-0250	648.642
833	Control_7_exp_10.tif:0644-0320	21.635
834	Control_7_exp_10.tif:0626-0347	28.9224
835	Control_7_exp_10.tif:0658-0290	22.0217
836	Control_7_exp_10.tif:0665-0253	25.4045
837	Control_7_exp_10.tif:0663-0217	27.2543
838	Control_7_exp_10.tif:0640-0174	19.8028
839	Control_7_exp_10.tif:0585-0145	14.5302
840	Control_7_exp_10.tif:0565-0140	19.1623
841	Control_7_exp_10.tif:0545-0133	30.434
842	Control_7_exp_10.tif:0477-0165	22.2523
843	Control_7_exp_10.tif:0465-0178	23.5335
844	Control_7_exp_10.tif:0453-0308	23.0285
845	Control_7_exp_10.tif:0472-0332	24.1418
846	Control_7_exp_10.tif:0512-0362	15.746
847	Control_7_exp_10.tif:0300-0179	776.163
848	Control_7_exp_10.tif:0177-0134	13.9745
849	Control_7_exp_10.tif:0171-0141	17.2091
850	Control_7_exp_10.tif:0170-0155	14.8283
851	Control_7_exp_10.tif:0166-0168	22.2699
852	Control_7_exp_10.tif:0162-0192	17.8982
853	Control_7_exp_10.tif:0168-0213	21.8354
854	Control_7_exp_10.tif:0175-0229	15.3353
855	Control_7_exp_10.tif:0182-0243	18.4649
856	Control_7_exp_10.tif:0185-0265	22.4762
857	Control_7_exp_10.tif:0194-0273	19.9958
858	Control_7_exp_10.tif:0201-0282	22.8504
859	Control_7_exp_10.tif:0218-0298	32.4111
860	Control_7_exp_10.tif:0275-0321	33.5444
861	Control_7_exp_10.tif:0298-0322	31.6236
862	Control_7_exp_10.tif:0311-0322	25.5654
863	Control_7_exp_10.tif:0320-0325	22.8799
864	Control_7_exp_10.tif:0337-0311	18.6017
865	Control_7_exp_10.tif:0354-0307	24.513
866	Control_7_exp_10.tif:0381-0285	17.1449
867	Control_7_exp_10.tif:0406-0271	21.3809
868	Control_7_exp_10.tif:0410-0267	19.9363
869	Control_7_exp_10.tif:0419-0243	11.1979
870	Control_7_exp_10.tif:0446-0175	23.7418
871	Control_7_exp_10.tif:0437-0148	18.0421
872	Control_7_exp_10.tif:0425-0131	14.5543
873	Control_7_exp_10.tif:0362-0061	17.7502
874	Control_7_exp_10.tif:0410-0105	16.3927
875	Control_7_exp_10.tif:0319-0048	19.93
876	Control_7_exp_10.tif:0292-0047	11.4018
877	Control_7_exp_10.tif:0231-0062	32.5873
878	Control_7_exp_10.tif:0268-0052	17.1007
879	Control_7_exp_10.tif:0255-0056	11.4018
880	Control_7_exp_10.tif:0211-0078	20.9239
881	Control_7_exp_10.tif:0201-0085	17.0928
882	Control_7_exp_10.tif:0176-0135	13.295
883	Control_7_exp_10.tif:0172-0144	15.6554
884	Control_7_exp_10.tif:0170-0154	10.3011
885	Control_7_exp_10.tif:0286-0737	909.574
886	Control_7_exp_10.tif:0119-0764	44.7571
887	Control_7_exp_10.tif:0153-0814	20.5094
888	Control_7_exp_10.tif:0165-0818	10.6431
889	Control_7_exp_10.tif:0163-0832	32.4561
890	Control_7_exp_10.tif:0175-0854	43.3296
891	Control_7_exp_10.tif:0184-0866	51.094
892	Control_7_exp_10.tif:0207-0861	17.5327
893	Control_7_exp_10.tif:0269-0896	29.4035
894	Control_7_exp_10.tif:0298-0893	29.1114
895	Control_7_exp_10.tif:0289-0916	64.1616
896	Control_7_exp_10.tif:0310-0894	30.4204
897	Control_7_exp_10.tif:0322-0890	19.2469
898	Control_7_exp_10.tif:0329-0885	14.434
899	Control_7_exp_10.tif:0338-0896	42.2714
900	Control_7_exp_10.tif:0373-0867	20.8457
901	Control_7_exp_10.tif:0377-0851	17.6778
902	Control_7_exp_10.tif:0407-0843	37.9935
903	Control_7_exp_10.tif:0394-0847	29.4163
904	Control_7_exp_10.tif:0430-0830	47.3232
905	Control_7_exp_10.tif:0450-0807	64.6062
906	Control_7_exp_10.tif:0444-0785	31.3925
907	Control_7_exp_10.tif:0433-0791	22.2376
908	Control_7_exp_10.tif:0437-0772	17.5302
909	Control_7_exp_10.tif:0450-0714	20.7464
910	Control_7_exp_10.tif:0446-0693	32.2088
911	Control_7_exp_10.tif:0450-0678	35.5412
912	Control_7_exp_10.tif:0437-0671	17.8442
913	Control_7_exp_10.tif:0435-0662	22.1583
914	Control_7_exp_10.tif:0418-0645	20.0766
915	Control_7_exp_10.tif:0431-0629	52.5826
916	Control_7_exp_10.tif:0406-0628	18.2672
917	Control_7_exp_10.tif:0387-0621	12.3705
918	Control_7_exp_10.tif:0377-0612	14.377
919	Control_7_exp_10.tif:0368-0603	26.469
920	Control_7_exp_10.tif:0322-0586	43.5505
921	Control_7_exp_10.tif:0272-0573	48.5199
922	Control_7_exp_10.tif:0266-0582	16.7705
923	Control_7_exp_10.tif:0236-0595	14.3208
924	Control_7_exp_10.tif:0190-0609	45.3559
925	Control_7_exp_10.tif:0164-0636	29.9115
926	Control_7_exp_10.tif:0154-0659	21.7447
927	Control_7_exp_10.tif:0141-0678	17.9159
928	Control_7_exp_10.tif:0136-0687	15.2413
929	Control_7_exp_10.tif:0134-0703	23.1103
930	Control_7_exp_10.tif:0133-0721	17.1018
931	Control_7_exp_10.tif:0369-0179	748.905
932	Control_7_exp_10.tif:0245-0160	18.925
933	Control_7_exp_10.tif:0246-0195	15.287
934	Control_7_exp_10.tif:0247-0216	24.5145
935	Control_7_exp_10.tif:0264-0251	17.9832
936	Control_7_exp_10.tif:0280-0268	17.253
937	Control_7_exp_10.tif:0292-0272	13.2826
938	Control_7_exp_10.tif:0306-0292	19.6044
939	Control_7_exp_10.tif:0316-0304	32.1784
940	Control_7_exp_10.tif:0333-0313	23.2387
941	Control_7_exp_10.tif:0358-0308	11.5744
942	Control_7_exp_10.tif:0379-0314	16
943	Control_7_exp_10.tif:0397-0311	11.8191
944	Control_7_exp_10.tif:0426-0304	14.3394
945	Control_7_exp_10.tif:0441-0292	8.94962
946	Control_7_exp_10.tif:0462-0280	21.441
947	Control_7_exp_10.tif:0476-0257	10.3911
948	Control_7_exp_10.tif:0487-0238	14.6418
949	Control_7_exp_10.tif:0495-0222	18.9036
950	Control_7_exp_10.tif:0496-0207	14.3587
951	Control_7_exp_10.tif:0497-0186	15.4028
952	Control_7_exp_10.tif:0504-0173	22.6053
953	Control_7_exp_10.tif:0494-0147	10.7628
954	Control_7_exp_10.tif:0481-0123	12.9173
955	Control_7_exp_10.tif:0455-0088	21.9003
956	Control_7_exp_10.tif:0452-0081	29.3623
957	Control_7_exp_10.tif:0438-0072	15.8304
958	Control_7_exp_10.tif:0392-0052	13.3187
959	Control_7_exp_10.tif:0383-0056	12.181
960	Control_7_exp_10.tif:0355-0051	18.6847
961	Control_7_exp_10.tif:0340-0053	15.6146
962	Control_7_exp_10.tif:0321-0058	17.6077
963	Control_7_exp_10.tif:0309-0071	14.97
964	Control_7_exp_10.tif:0293-0083	10.3436
965	Control_7_exp_10.tif:0272-0090	25.5858
966	Control_7_exp_10.tif:0259-0117	19.2194
967	Control_7_exp_10.tif:0243-0132	30.6468
968	Control_7_exp_10.tif:0241-0162	18.593
969	Control_7_exp_09.tif:0196-0176	667.645
970	Control_7_exp_09.tif:0088-0143	23.7722
971	Control_7_exp_09.tif:0086-0158	18.0011
972	Control_7_exp_09.tif:0080-0207	34.161
973	Control_7_exp_09.tif:0091-0215	26.9463
974	Control_7_exp_09.tif:0092-0228	28.2068
975	Control_7_exp_09.tif:0097-0243	22.8056
976	Control_7_exp_09.tif:0122-0267	24.4633
977	Control_7_exp_09.tif:0136-0285	27.2094
978	Control_7_exp_09.tif:0173-0287	13.0681
979	Control_7_exp_09.tif:0206-0297	35.9377
980	Control_7_exp_09.tif:0227-0290	36.9698
981	Control_7_exp_09.tif:0274-0255	10.6528
982	Control_7_exp_09.tif:0284-0252	20.2676
983	Control_7_exp_09.tif:0300-0212	20.8313
984	Control_7_exp_09.tif:0298-0225	13.4359
985	Control_7_exp_09.tif:0305-0186	11.4389
986	Control_7_exp_09.tif:0314-0177	26.6625
987	Control_7_exp_09.tif:0309-0141	25.7271
988	Control_7_exp_09.tif:0302-0120	18.0664
989	Control_7_exp_09.tif:0280-0093	18.3078
990	Control_7_exp_09.tif:0272-0082	30.7437
991	Control_7_exp_09.tif:0242-0066	28.8016
992	Control_7_exp_09.tif:0182-0068	16.0244
993	Control_7_exp_09.tif:0161-0070	24.7467
994	Control_7_exp_09.tif:0152-0078	15.0402
995	Control_7_exp_09.tif:0135-0081	30.149
996	Control_7_exp_09.tif:0124-0087	45.8521
997	Control_7_exp_09.tif:0125-0092	22.0111
998	Control_7_exp_09.tif:0114-0107	15.2119
999	Control_7_exp_09.tif:0102-0121	13.5801
1000	Control_7_exp_09.tif:0088-0127	34.2409
1001	Control_7_exp_09.tif:0089-0140	19.3982
1002	Control_7_exp_09.tif:0087-0154	18.8203
1003	Control_7_exp_09.tif:0080-0133	40.2944
1004	Control_7_exp_09.tif:0305-0720	736.949
1005	Control_7_exp_09.tif:0195-0785	23.9132
1006	Control_7_exp_09.tif:0198-0798	31.7797
1007	Control_7_exp_09.tif:0212-0806	25.1634
1008	Control_7_exp_09.tif:0367-0834	24.3016
1009	Control_7_exp_09.tif:0405-0807	22.5547
1010	Control_7_exp_09.tif:0409-0793	15.445
1011	Control_7_exp_09.tif:0418-0785	20.7772
1012	Control_7_exp_09.tif:0438-0749	25.8645
1013	Control_7_exp_09.tif:0435-0695	15.9915
1014	Control_7_exp_09.tif:0404-0637	17.5227
1015	Control_7_exp_09.tif:0383-0613	29.4716
1016	Control_7_exp_09.tif:0324-0604	15.7084
1017	Control_7_exp_09.tif:0245-0604	21.6268
1018	Control_7_exp_09.tif:0227-0625	12.816
1019	Control_7_exp_08.tif:0218-0230	835.445
1020	Control_7_exp_08.tif:0063-0239	23.4904
1021	Control_7_exp_08.tif:0090-0294	19.0934
1022	Control_7_exp_08.tif:0240-0379	24.7929
1023	Control_7_exp_08.tif:0252-0378	26.9317
1024	Control_7_exp_08.tif:0330-0131	27.9064
1025	Control_7_exp_08.tif:0301-0118	17.4936
1026	Control_7_exp_08.tif:0180-0091	25.2403
1027	Control_7_exp_08.tif:0111-0131	24.7931
1028	Control_7_exp_08.tif:0101-0132	20.5918
1029	Control_7_exp_08.tif:0075-0191	27.7626

## Sheet: Filop_length cell_sorted
	Ctr_7_01	Ctr_7_02	Ctr_7_03	Ctr_7_04	Ctr_7_05	Ctr_7_06	Ctr_7_07	Ctr_7_08	Ctr_7_09	Ctr_7_10	Ctr_7_11	Ctr_7_12	Ctr_7_13	Ctr_7_14	Ctr_7_15	Ctr_7_16	Ctr_7_17	Ctr_7_18	Ctr_7_19	Ctr_7_20	Ctr_7_21	Ctr_7_22	Ctr_7_23	Ctr_7_24	Ctr_7_25	Ctr_7_26	Ctr_7_27	Ctr_7_28	Ctr_7_29	Ctr_7_30	Ctr_7_31	Ctr_7_32	Ctr_22_01	Ctr_22_02	Ctr_22_03	Ctr_22_04	Ctr_22_05	Ctr_22_06	Ctr_22_07	Ctr_22_08	Ctr_22_09	Ctr_22_10	Ctr_22_11	Ctr_22_12	Ctr_22_13	Ctr_22_14	Ctr_22_15	Ctr_22_16	Ctr_22_17
MEAN	39.3766	25.1229	70.7884	37.7128	36.4541	26.7919	35.1731	27.9634	30.2631	24.7356	40.6595	30.1059	36.1863	37.458	24.9745	30.6062	38.8901	26.8794	44.5851	23.5593	25.1708	22.0573	28.1017	20.8516	37.4362	22.7049	19.6245	28.9906	17.5738	23.8778	21.6383	23.8096	23.9884	20.6017	21.8785	19.439	27.1468	28.3875	21.9672	25.8599	28.2173	13.9488	25.9105	15.4338	17.0579	22.9904	15.1749	30.5894	30.8226
RADIUS	942.432	696.892	1254	774.837	1009.8	658.218	981.634	757.805	970.186	759.666	815.029	606.908	943.527	1104.8	781.401	712.83	526.742	596.359	782.36	623.656	619.925	734.642	656.879	1082.15	876.402	648.642	776.163	909.574	748.905	667.645	736.949	835.445	703.694	585.334	574.155	612.353	642.854	638.038	599.177	635.716	600.539	669.653	625.679	852.712	669.948	685.794	587.207	568.138	687.012
	27.8358	35.1911	140.472	61.147	50.2479	21.1804	26.0396	25.0538	33.5122	26.6214	36.7475	21.9306	16.426	28.8477	18.5526	30.0354	35.8555	24.219	45.8095	32.4861	45.9272	47.6444	55.1027	30.8789	64.2268	21.635	13.9745	44.7571	18.925	23.7722	23.9132	23.4904	31.4424	13.5747	36.1749	13.2598	44.0195	26.9092	23.8758	24.2135	27.8286	19.9064	30.1766	16.8328	21.9439	24.4005	12.4755	44.7414	22.8962
	19.8271	27.3842	46.0478	53.0805	26.2621	13.9811	40.9234	22.2398	15.0438	17.7568	36.9833	29.2934	14.2874	35.5632	42.5953	58.8431	52.1565	19.8247	29.4992	29.6381	37.1805	29.6352	28.2719	30.9862	36.667	28.9224	17.2091	20.5094	15.287	18.0011	31.7797	19.0934	16.964	30.7339	35.4235	15.1062	33.5872	18.8944	14.6336	22.7311	39.4424	16.7441	27.1422	21.125	24.9977	14.5807	17.586	35.199	28.9148
	16.1537	34.1295	107.256	19.7972	28.6987	48.608	35.2052	24.0063	27.9995	15.452	55.6174	42.2779	42.8715	23.0517	18.1156	33.5891	53.6864	17.3888	56.5593	28.635	37.9151	22.6407	17.5816	19.1712	42.4737	22.0217	14.8283	10.6431	24.5145	34.161	25.1634	24.7929	34.6869	31.548	13.4292	37.4182	17.8012	17.1789	18.4761	23.1828	33.0954	17.1347	26.6281	27.7931	19.2155	25.0492	9.37288	24.9362	26.3616
	40.7141	29.7785	97.5027	50.0061	33.8404	23.421	34.1969	34.1626	27.1295	35.5704	18.5449	24.0043	32.9266	43.418	22.0484	25.6833	66.1974	46.6394	63.2457	12.0717	26.8335	24.4367	25.2938	31.2702	53.9005	25.4045	22.2699	32.4561	17.9832	26.9463	24.3016	26.9317	33.8028	30.3862	40.8236	20.1093	21.4585	25.2269	30.9726	24.7494	39.6207	10.3513	17.3596	17.6691	16.7917	20.0691	11.0333	54.8713	25.2851
	58.2205	15	53.6927	66.6849	91.3249	23.0842	37.4305	33.174	22.6713	16.3904	35.2404	20.1813	26.8426	11.6906	18.243	27.6439	36.2414	27.2501	37.3657	17.0627	38.9286	30.6541	18.9547	25.4907	33.7687	27.2543	17.8982	43.3296	17.253	28.2068	22.5547	27.9064	16.5346	39.2645	18.9621	23.2467	21.2055	23.6651	46.0957	27.5646	33.8932	13.2686	26.931	14.6537	11.9432	31.6369	14.3962	25.3689	41.3261
	34.7179	15.0358	96.1374	46.7748	26.0661	14.9386	36.5224	25.8211	28.8274	35.1625	22.5464	33.9408	35.6602	69.2337	30.9216	24.6639	28.9701	20.7577	13.0259	29.0542	27.8604	36.8387	42.123	12.8331	28.409	19.8028	21.8354	51.094	13.2826	22.8056	15.445	17.4936	19.7876	21.908	33.1207	26.0578	51.9094	33.7424	30.2966	10.4123	38.1636	12.1395	24.7061	24.0948	24.9153	43.9189	32.0373	16.2637	37.4038
	11.3123	26.9679	69.7727	23.9939	38.9476	49.8465	39.9767	21.6173	39.9981	26.5941	29.4022	15.1531	28.963	73.4569	26.6948	13.9769	22.0476	40.8169	50.5637	32.8301	29.8959	28.6787	31.0852	19.3756	17.133	14.5302	15.3353	17.5327	19.6044	24.4633	20.7772	25.2403	33.7336	22.6249	21.5519	16.9615	18.9808	47.697	15.1158	27.3037	49.6525	7.60285	12.0455	14.6632	20.2118	13.5865	17.5132	39.1859	21.7068
	69.2359	27.6708	28.9795	41.401	31.8491	26.414	41.1799	35.1264	22.7236	27.3195	24.9927	42.9856	22.1075	47.0052	29.9945	27.4063	26.2553	24.4793	59.5049	21.822	22.3081	20.8944	21.7691	26.2845	22.9111	19.1623	18.4649	29.4035	32.1784	27.2094	25.8645	24.7931	31.3045	24.0663	17.8332	17.3153	16.0978	18.3235	32.1006	20.2936	22.4512	10.3094	37.231	14.2208	15.9944	20.5805	10.6351	31.3118	15.7208
	17.8962	21.5432	57.8552	44.5136	31.8517	33.0168	28.4933	31.8713	26.4228	18.3318	83.695	15.3802	58.1699	29.8199	36.1441	19.019	28.6007	34.7907	28.4595	17.8799	47.0664	32.7512	23.7989	44.0434		30.434	22.4762	29.1114	23.2387	13.0681	15.9915	20.5918	39.6842	29.9773	21.5301	18.7098	12.1754	37.5588	17.7435	34.0574	34.6339	18.0822	29.5337	23.792	26.3485	32.1798	15.5128	26.6625	49.7564
	48.8939	29.7965	66.7066	36.0978	28.456	21.3776	25.8442	27.3282	12.651	19.9215	80.392	34.9683	43.9417	58.6393	23.4237	19.0372		11.5773	90.2137	32.4261	18.4804	14.1578	61.8543	29.1119		22.2523	19.9958	64.1616	11.5744	35.9377	17.5227	27.7626	26.3583	16.1992	34.2179	25.2218	31.7211	47.5917	28.4364	24.7015	39.5846		23.88	18.2724	10.7412	13.8849	16.119	51.5435	27.4873
	42.7736	39.7792	43.278	43.7751	50.0269	20.1509	44.4083	27.1967	31.5215	10.7784	31.5191	58.8291	68.0953	28.1587	29.5257	35.7561		24.0846	46.3339	18.5742	17.2043	34.7556	18.4366	21.2083		23.5335	22.8504	30.4204	16	36.9698	29.4716		40.4051	12.2442	28.1174	24.0208	23.597	41.0926	14.9151	21.2526	23.3622		21.2899	8.25005	12.7593	27.9199	22.4714	31.322	41.5874
	21.3956	18.3251	41.7603	43.21	29.2746	33.1911	21.9645		28.4258	20.8524	32.2325	22.3259	54.5058	35.2926	20.2835	17.8272		47.9085	52.6935	23.3928	17.4747	28.8571	10.0173	21.4428		23.0285	32.4111	19.2469	11.8191	10.6528	15.7084		15.8741	9.49689	15.5062	12.1106	12.6772	22.9797	25.9005	27.8492	31.1735		32.0072	16.1157	12.4568	35.6367	9.05539	35.2652	28.6844
	28.0756	29.9568		33.0435	25.6283	17.2977	16.4335		51.9845	27.2921			41.1253	17.2057	22.9795	18.3087		17.7688	54.17	25.5193	23.3246	15.7968	19.312	27.9525		24.1418	33.5444	14.434	14.3394	20.2676	21.6268		27.1359	15.8574	32.5147	15.6529	22.2376	17.652	38.18	31.4745	17.5445		14.8851	8.28115	16.1904	15.3445	11.0499	23.6154	44.9076
	76.0271	48.4754		29.0984	32.5181	30.3464	34.6941		18.3919	42.64			29.9845	31.2588	43.7849	57.9384		47.5876	22.6316	24.7787	30.3284	17.567	27.9535	21.7907		15.746	31.6236	42.2714	8.94962	20.8313	12.816		31.3296	17.5887	20.6352	13.5719	35.433	20.967	20.7294	15.671	25.4335		31.8133	14.9816	8.97226	13.786	10.8086	28.3628	36.7937
	13.0384	18.7543		21.2546	22.2723	25.0238	74.7591		49.0792	24.0197			24.1796	39.2458	32.4111	18.2559		20.4672	50.1197	14.231	27.3501	16.4817	25.7034	17.3034			25.5654	20.8457	21.441	13.4359			18.486	13.3185	17.0901	26.0889	41.7544	21.2852	35.8426	27.4742	31.5197		17.7768	10.3911	12.9496	12.2826	14.0098	33.1805	25.6561
	29.3479	17.6109		23.6174	27.4384		24.6985		47.5055	12.7008			25.8455	76.5343	40.0339	44.6716		20.021	40.4071	30.6385	23.0613	30.1173	20.8719	21.1616			22.8799	17.6778	10.3911	11.4389			16.4978	28.1126	17.5028	10.4144	24.3532	24.7447	19.0756	38.3115	30.2541		45.0367	9.63007	14.9237		16.057	53.2523	27.3908
	26.6453	12.7413		12.5439	45.0168				30.6289	13.555			36.4715	78.8586	51.7553	26.6385		48.2335	48.3534	29.0371	22.5382	32.2109	22.9155	22.3987			18.6017	37.9935	14.6418	26.6625			26.8289	15.8199	7.23191	31.4227	16.4084	16.1601	13.3994	15.2216	18.3471		41.7286	8.06226	16.604		22.6004	25.0386	23.7548
	61.4356	26.6397		29.5255					21.615	60.5507			68.6645	39.5658	23.3248	31.075		33.7688	46.3447	31.1684	15.8013	14.4239	20.7748	19.225			24.513	29.4163	18.9036	25.7271			31.391	30.5058	29.2916	36.925	12.2501	27.0898	19.2164	27.5356	27.905		22.5877	8.09248	20.7308		15.8865	39.2753	27.0417
	41.9386	17.1547		20.5682					44.4191	19.5383			25.7707	49.4994	29.8211	59.4457		38.2664	47.2983	18.8982	17.1146	14.5771	51.6763	14			17.1449	47.3232	14.3587	18.0664			21.9227	9.58574	10.2639	22.6705	23.217	37.8897	12.7021	22.9352	21.5661		38.7637	15.6179	20.1832		23.4946	18.9686	22.642
	52.4357	12.9005		35.4053					18.7126	15.1119			26.7004	53.8388	22.4627	33.5172		16.6216	24.0285	11.9342	11.088	15.1526	24.3902	11.2263			21.3809	64.6062	15.4028	18.3078			26.2167	17.9151	18.9923	18.3422	37.5508	25.5951	26.0224	10.6322	16.8995		27.9309	16.1364	16.8711		19.0251	18.1745	37.4918
	54.6157	17.1851		48.8758					22.7628	17.06			43.4283	15.2141	18.3554	38.8779		14.1796	18.7634	21.0401	15.1008	19.0704	14.3101	12.8964			19.9363	31.3925	22.6053	30.7437			21.3937	14.9543	10.3891	15.4153	22.4964	44.9759	26.9123	25.2345	32.906		29.7413		22.1168		9.39415	56.1873	29.5465
	39.7358	20.6126		42.9535					23.9948	52.4723			40.1881	13.074	34.1257	31.3638		10.3114	43.0436	20.5714	11.3453	15.3424	29.6758	11.2918			11.1979	22.2376	10.7628	28.8016			32.1079	38.2475	19.0032	23.1915	46.6327	39.0222	22.9181	18.3602	25.4035		19.5636		9.21954		6.99056	18.999	41.1284
	49.1859	31.0045		27.396					27.1441	21.6461			48.6144	31.5965	21.457	11.2287		11.2642	41.6777	21.981	20.0047	20.8676	19.3461	11.5304			23.7418	17.5302	12.9173	16.0244			16.2235	24.7047	15.2584	7.82282	41.2469	21.011	16.8518	27.537	20.2249		19.5608		14.3473		21.6735	46.7707	47.666
	32.9559	34.2138		60.3219					14.3219	20.2196			39.6367	32.4907	25.7402	18.1893			69.8137	50.1515	27.3843	30.0142	44.4826	18.6332			18.0421	20.7464	21.9003	24.7467			10.5221	9.97785	19.5722	33.5234	14.0627	40.6763	11.2734	35.8981	37.6772		17.1144		17.9624		9.51638	21.1955	35.2734
	37.4572	20.2214		37.5369					25.007	21.9969			20.1397	49.9673	10.8506	36.3945			21.4082	13.8137	17.4032	11.1249	8.38197	23.3905			14.5543	32.2088	29.3623	15.0402			27.1041	28.3148	13.4389	17.5418	18.0506	29.8685	15.8271	39.6145	14.0739		12.3283				15.2143	22.2612	24.1825
	32.7543			27.91					34.0335	34.9248			45.6789	48.6871	23.4966	39.3024			29.2981	17.1617	13.6366	12.7673	14.8043	15.9273			17.7502	35.5412	15.8304	30.149			20.6631	17.5972	24.7878	15.1815	37.7628	19.6568	13.3529	33.9529	25.5211						7.65563	25.4305	21.861
	64.3338								38.5281	18.5243			22.2185	52.4662	26.6329	22.1345			27.8822	28.7036	27.901	21.3709	31.8545	15			16.3927	17.8442	13.3187	45.8521			16.3832	15.9887	15.0861	11.9901	9.6475	23.293	19.19	12.5748	35.9585						15.2776	26.0208	25.5414
	27.2482								37.8203	26.2696			51.817	42.5001	32.07	16.9883			23.6342	13.1529	34.4699	16.6863	17.9632	22.4559			19.93	22.1583	12.181	22.0111			25.2745	14.0139	13.5273	11.1354	15.8154	34.2009	9.55547	22.9435	19.5607						14.951	22.3802	37.4523
	25.2167								42.3664	16.3608			14.1417	55.202	34.624	29.9002			64.5674	28.3888	33.1524	14.1777	45.0127	15.2315			11.4018	20.0766	18.6847	15.2119			23.6158	18.7271	15.3973	22.4472	34.9033	23.9318	11.8893	18.6251	12.638						27.5586	26.9133	48.9735
	22								51.379	26.4348				11.0557	23.0817	40.0245			39.7821	16.133	12.0977	28.0839	52.6253	12.4765			32.5873	52.5826	15.6146	13.5801			9.86709	10.2841	33.1571	14.0143	33.5573	22.8694	34.9708	34.0774	23.5495						9.55303	46.789	15.5014
	22								25.5768					17.0285	16.3752	52.102			53.3288	18.3723	14.4868	11.6325	34.3862	24.5571			17.1007	18.2672	17.6077	34.2409			36.4421	15.1145	28.4016	27.2118	12.3882	43.792	17.5347	21.3415	18.0661						11.498	35.6873	33.5996
	40.889								32.6795					28.2893	16.6327	29.822			62.9693	15.8679	42.8126	15.8447	18.5261	16.6446			11.4018	12.3705	14.97	19.3982			18.0827			20.0842	16.362	50.711	25.8212	18.1782	35.3392							13.3891	18.3595
	48.8588								51.7308					65.4281	16.8397	20.3448			40.2505	22.0427	23.8862	16.9628		13.9112			20.9239	14.377	10.3436	18.8203			10.3631			13.8076	14.6085	26.9958	15.0906	11.8869	23.2604							20.6456	19.2125
	61.5909								28.6993					23.1298	12.8797				87.2366	26.6962	26.6421	13.5501		29.356			17.0928	26.469	25.5858	40.2944			15.3542			12.8673	28.1801	43.3302		35.3026	18.9086							19.1418	33.5807
	48.7234								15.5242					36.8233	13.7149				27.1904	32.9383	23.4893	21.149		12.4411			13.295	43.5505	19.2194				26.2992			9.50507	18.8865	25.0514		13.2103	40.1668							24.7421	21.3631
	42.2873								28.5644					51.6125	11.7169				66.0721	13.0421	19.8721	17.1465		17.4635			15.6554	48.5199	30.6468				22.8826				25.1623	23.5848		38.7582	16.6086							34.0225	43.5028
	38.3622								20.3385					20.1195	23.8626				69.3989	25.5357	34.3074			10.6431			10.3011	16.7705	18.593				24.2385				33.7683	27.0132		21.2781	16.0731							24.7217	17.6334
	42.7167													27.8818	15.8976				37.2397	24.2433	31.3977			28.3522				14.3208					14.7802				51.5792	31.233		59.1674	31.8638							26.4577	34.4593
	67.7485													32.5524	32.1134				43.2396	15.6514	14.5898			33.8569				45.3559					26.6845				51.7948	19.2638		41.7335	36.3262							23.349	35.4938
	71.8199													28.0797	11.3831				72.5776	10.8525								29.9115					28.4142				38.5743	10.3105		27.8904	42.1946							41.4794	25.145
	46.6016													37.2802	36.4705				26.4489	31.0708								21.7447					43.7465				20.4676	18.8634		25.1218								32.8883	40.7295
	63.7466													40.4176	19.8713				24.0451	27.4064								17.9159					23.8379				35.7816	20.3757										31.908	30.7634
	20.2397													27.5872	31.5328				21.5378	36.1528								15.2413					10.9419															18.6384	49.9762
	24.1939													17.9729	21.6662				43.7089									23.1103					41.6666															30.1713	27.34
	27.8543													46.4258	20.2978													17.1018					13.4257															39.0128	22.808
	44.4198													55.0532	22.2475																		34.6337															18.8763	45.1397
	46.2807													27.1977	16.7478																		18.1786															30.1687	19.6177
	45.4768													38.6407																			28.2673															16.908	34.8248
	54.4214													36.7677																			24.4732															49.9457	22.8495
	19.1462													35.9223																			19.4644															18.454	29.7134
	39.7908													24.9454																			14.3947															28.6022	24.0056
	35.4117													15.3285																			35.2545															25.5889	45.8285
	37.4218													28.3511																			13.8924															38.1245	35.5601
	26.3942																																11.8065															27.6152	29.9865
	43.1985																																26.3543															42.3905	24.6873
	22.0728																																29.2212																38.9787
																																	10.6962																31.0925
																																																	47.2097
																																																	32.1677
																																																	13.7136
																																																	32.2543
																																																	47.3395
																																																	28.061
																																																	13.8988
																																																	13.4681
																																																	29.991
[truncated: 50 more columns]

## Sheet: Filop_length average
Condition	Cell #	N filop.	Cell diamet. (pix)	Mean filop. length (pix)	Density filop. (µm-1)	Mean filop. length (µm)	Cell/filopodia perimeter
Control 7µm	1	56	942.432	39.3766	0.914165	2.55948	4.67958
Control 7µm	2	25	696.892	25.1229	0.551901	1.63299	1.8025
Control 7µm	3	12	1254	70.7884	0.147221	4.60124	1.3548
Control 7µm	4	26	774.837	37.7128	0.516237	2.45133	2.53094
Control 7µm	5	17	1009.8	36.4541	0.259001	2.36952	1.22742
Control 7µm	6	15	658.218	26.7919	0.350597	1.74147	1.22111
Control 7µm	7	16	981.634	35.1731	0.250759	2.28625	1.1466
Control 7µm	8	11	757.805	27.9634	0.223317	1.81762	0.811812
Control 7µm	9	37	970.186	30.2631	0.586724	1.9671	2.30829
Control 7µm	10	30	759.666	24.7356	0.607554	1.60782	1.95367
Control 7µm	11	12	815.029	40.6595	0.226514	2.64286	1.19729
Control 7µm	12	12	606.908	30.1059	0.30419	1.95688	1.19053
Control 7µm	13	29	943.527	36.1863	0.472857	2.35211	2.22442
Control 7µm	14	53	1104.8	37.458	0.738036	2.43477	3.59389
Control 7µm	15	47	781.401	24.9745	0.92536	1.62334	3.00435
Control 7µm	16	33	712.83	30.6062	0.712221	1.9894	2.83379
Control 7µm	17	9	526.742	38.8901	0.262864	2.52786	1.32896
Control 7µm	18	23	596.359	26.8794	0.593344	1.74716	2.07334
Control 7µm	19	44	782.36	44.5851	0.865232	2.89803	5.01494
Control 7µm	20	43	623.656	23.5593	1.06074	1.53135	3.24874
Control 7µm	21	39	619.925	25.1708	0.967858	1.6361	3.16703
Control 7µm	22	36	734.642	22.0573	0.753899	1.43372	2.16177
Control 7µm	23	32	656.879	28.1017	0.749465	1.82661	2.73796
Control 7µm	24	39	1082.15	20.8516	0.55445	1.35536	1.50295
Control 7µm	25	8	876.402	37.4362	0.140434	2.43336	0.683453
Control 7µm	26	14	648.642	22.7049	0.332055	1.47582	0.980107
Control 7µm	27	37	776.163	19.6245	0.733391	1.27559	1.87102
Control 7µm	28	45	909.574	28.9906	0.761134	1.88439	2.86855
Control 7µm	29	37	748.905	17.5738	0.760085	1.1423	1.73649
Control 7µm	30	34	667.645	23.8778	0.783466	1.55206	2.43197
Control 7µm	31	14	736.949	21.6383	0.292265	1.40649	0.822137
Control 7µm	32	10	835.445	23.8096	0.184149	1.54763	0.569986
Control 22µm	1	57	703.694	23.9884	1.24617	1.55925	3.88618
Control 22µm	2	31	585.334	20.6017	0.814788	1.33911	2.18218
Control 22µm	3	31	574.155	21.8785	0.830652	1.4221	2.36254
Control 22µm	4	35	612.353	19.439	0.879331	1.26354	2.22213
Control 22µm	5	42	642.854	27.1468	1.00513	1.76454	3.54719
Control 22µm	6	42	638.038	28.3875	1.01272	1.84519	3.73731
Control 22µm	7	33	599.177	21.9672	0.847316	1.42787	2.41971
Control 22µm	8	41	635.716	25.8599	0.992219	1.68089	3.33562
Control 22µm	9	40	600.539	28.2173	1.02472	1.83412	3.75893
Control 22µm	10	9	669.653	13.9488	0.206766	0.90667	0.374937
Control 22µm	11	25	625.679	25.9105	0.614717	1.68418	2.07059
Control 22µm	12	20	852.712	15.4338	0.36084	1.0032	0.723985
Control 22µm	13	24	669.948	17.0579	0.551134	1.10877	1.22216
Control 22µm	14	15	685.794	22.9904	0.336499	1.49438	1.00571
Control 22µm	15	31	587.207	15.1749	0.812189	0.98637	1.60224
Control 22µm	16	55	568.138	30.5894	1.48935	1.98831	5.92256
Control 22µm	17	66	687.012	30.8226	1.47797	2.00347	5.92214
Control 22µm	18	32	543.743	16.4274	0.905404	1.06778	1.93354
Control 22µm	19	45	598.508	26.5869	1.15672	1.72815	3.99798
Control 22µm	20	29	553.624	13.6543	0.805879	0.887527	1.43048
Control 22µm	21	40	635.389	25.1949	0.968517	1.63767	3.17222
Control 22µm	22	29	450.546	34.4498	0.990252	2.23924	4.43482
Control 22µm	23	34	622.107	43.718	0.840815	2.84167	4.77863
LatA 7µm	1	21	626.786	23.0683	0.51545	1.49944	1.54577
LatA 7µm	2	9	725.254	23.0838	0.190915	1.50045	0.572916
LatA 7µm	3	10	762.326	39.3622	0.201812	2.55854	1.03269
LatA 7µm	4	5	711.475	28.0718	0.108118	1.82467	0.394558
LatA 7µm	5	7	859.436	25.1146	0.125306	1.63245	0.40911
LatA 7µm	6	11	761.956	17.1418	0.222101	1.11422	0.494937
LatA 7µm	7	21	793.128	20.34	0.407345	1.3221	1.0771
LatA 7µm	8	9	666.105	20.9421	0.207867	1.36123	0.565913
LatA 7µm	9	5	844.952	30.7472	0.0910384	1.99857	0.363892
LatA 7µm	10	6	872.751	23.9115	0.105766	1.55425	0.328774
LatA 7µm	11	11	660.543	19.9093	0.2562	1.29411	0.663099
LatA 7µm	12	5	672.787	17.501	0.114335	1.13756	0.260127
LatA 7µm	13	8	908.838	27.609	0.135422	1.79458	0.486053
LatA 7µm	14	13	703.567	13.9419	0.284266	0.906225	0.515217
LatA 7µm	15	9	584.982	17.4963	0.236694	1.13726	0.538365
LatA 7µm	16	11	749.831	20.8335	0.225692	1.35418	0.611254
LatA 7µm	17	10	565.064	23.583	0.272263	1.53289	0.834701
LatA 7µm	18	16	636.753	10.8505	0.386576	0.705279	0.545289
LatA 7µm	19	10	854.096	16.1887	0.180127	1.05226	0.379083
LatA 7µm	20	9	738.402	21.4753	0.187515	1.39589	0.523502
LatA 7µm	21	15	839.32	16.8176	0.274948	1.09314	0.601113
LatA 7µm	22	17	665.809	19.6365	0.392813	1.27637	1.00275
LatA 7µm	23	7	648.606	13.4153	0.166036	0.871993	0.289565
LatA 22µm	1	4	719.22	6.35355	0.0855628	0.412981	0.0706716
LatA 22µm	2	6	761.128	12.8731	0.121277	0.836752	0.202958
LatA 22µm	3	9	706.418	12.2693	0.196005	0.797502	0.312629
LatA 22µm	4	11	641.391	13.072	0.26385	0.849678	0.448374
LatA 22µm	5	9	673.045	43.6554	0.205724	2.8376	1.16753
LatA 22µm	6	4	769.914	7.24336	0.079929	0.470818	0.0752641
LatA 22µm	7	27	978.503	25.2911	0.42451	1.64392	1.39572
LatA 22µm	8	22	719.839	39.5489	0.470191	2.57068	2.41742
LatA 22µm	9	4	542.699	2.62153	0.113393	0.170399	0.0386443
LatA 22µm	10	4	578.103	3.35949	0.106449	0.218367	0.0464899
LatA 22µm	11	21	599.028	28.7278	0.539336	1.86731	2.01421
LatA 22µm	12	13	629.089	26.6758	0.31792	1.73392	1.1025
LatA 22µm	13	19	786.094	28.5569	0.371848	1.8562	1.38045
LatA 22µm	14	4	782.523	9.52506	0.0786411	0.619129	0.0973779
LatA 22µm	15	6	855.406	14.9763	0.107911	0.97346	0.210094
LatA 22µm	16	5	479.742	13.8939	0.160343	0.903106	0.289613
LatA 22µm	17	4	650.248	2.58836	0.0946384	0.168243	0.0318446
LatA 22µm	18	6	699.775	7.45303	0.131911	0.484447	0.127807
LatA 22µm	19	6	508.862	11.426	0.1814	0.742687	0.269447
LatA 22µm	20	8	683.369	18.23	0.180103	1.18495	0.426826
LatA 22µm	21	13	582.805	23.0236	0.343168	1.49654	1.02713

## Sheet: Filop_length plot
Density filop. (µm-1)	Control 22µm	LatA 22µm	Control 7µm	LatA 7µm		Mean filop. length (µm)	Control 22µm	LatA 22µm	Control 7µm	LatA 7µm		Perimeter(filop.)/Perimeter(cell)	Control 22µm	LatA 22µm	Control 7µm	LatA 7µm
	1.24617	0.0855628	0.914165	0.51545			1.55925	0.412981	2.55948	1.49944			3.88618	0.0706716	4.67958	1.54577
	0.814788	0.121277	0.551901	0.190915			1.33911	0.836752	1.63299	1.50045			2.18218	0.202958	1.8025	0.572916
	0.830652	0.196005	0.147221	0.201812			1.4221	0.797502	4.60124	2.55854			2.36254	0.312629	1.3548	1.03269
	0.879331	0.26385	0.516237	0.108118			1.26354	0.849678	2.45133	1.82467			2.22213	0.448374	2.53094	0.394558
	1.00513	0.205724	0.259001	0.125306			1.76454	2.8376	2.36952	1.63245			3.54719	1.16753	1.22742	0.40911
	1.01272	0.079929	0.350597	0.222101			1.84519	0.470818	1.74147	1.11422			3.73731	0.0752641	1.22111	0.494937
	0.847316	0.42451	0.250759	0.407345			1.42787	1.64392	2.28625	1.3221			2.41971	1.39572	1.1466	1.0771
	0.992219	0.470191	0.223317	0.207867			1.68089	2.57068	1.81762	1.36123			3.33562	2.41742	0.811812	0.565913
	1.02472	0.113393	0.586724	0.0910384			1.83412	0.170399	1.9671	1.99857			3.75893	0.0386443	2.30829	0.363892
	0.206766	0.106449	0.607554	0.105766			0.90667	0.218367	1.60782	1.55425			0.374937	0.0464899	1.95367	0.328774
	0.614717	0.539336	0.226514	0.2562			1.68418	1.86731	2.64286	1.29411			2.07059	2.01421	1.19729	0.663099
	0.36084	0.31792	0.30419	0.114335			1.0032	1.73392	1.95688	1.13756			0.723985	1.1025	1.19053	0.260127
	0.551134	0.371848	0.472857	0.135422			1.10877	1.8562	2.35211	1.79458			1.22216	1.38045	2.22442	0.486053
	0.336499	0.0786411	0.738036	0.284266			1.49438	0.619129	2.43477	0.906225			1.00571	0.0973779	3.59389	0.515217
	0.812189	0.107911	0.92536	0.236694			0.98637	0.97346	1.62334	1.13726			1.60224	0.210094	3.00435	0.538365
	1.48935	0.160343	0.712221	0.225692			1.98831	0.903106	1.9894	1.35418			5.92256	0.289613	2.83379	0.611254
	1.47797	0.0946384	0.262864	0.272263			2.00347	0.168243	2.52786	1.53289			5.92214	0.0318446	1.32896	0.834701
	0.905404	0.131911	0.593344	0.386576			1.06778	0.484447	1.74716	0.705279			1.93354	0.127807	2.07334	0.545289
	1.15672	0.1814	0.865232	0.180127			1.72815	0.742687	2.89803	1.05226			3.99798	0.269447	5.01494	0.379083
	0.805879	0.180103	1.06074	0.187515			0.887527	1.18495	1.53135	1.39589			1.43048	0.426826	3.24874	0.523502
	0.968517	0.343168	0.967858	0.274948			1.63767	1.49654	1.6361	1.09314			3.17222	1.02713	3.16703	0.601113
	0.990252		0.753899	0.392813			2.23924		1.43372	1.27637			4.43482		2.16177	1.00275
	0.840815		0.749465	0.166036			2.84167		1.82661	0.871993			4.77863		2.73796	0.289565
			0.55445						1.35536						1.50295
			0.140434						2.43336						0.683453
			0.332055						1.47582						0.980107
			0.733391						1.27559						1.87102
			0.761134						1.88439						2.86855
			0.760085						1.1423						1.73649
			0.783466						1.55206						2.43197
			0.292265						1.40649						0.822137
			0.184149						1.54763						0.569986

## Sheet: Bleb_area_raw_data
	Label	Area(pix)	Cell area	Mean bleb	Tot. bleb	Fraction		Label	Area(pix)	Cell area	Mean bleb	Tot. bleb	Fraction		Label	Area(pix)	Cell area	Mean bleb	Tot. bleb	Fraction		Label	Area(pix)	Cell area	Mean bleb	Tot. bleb	Fraction
1	Control_7_exp_04.tif	40273	40273	14	14	0.000347507	121	Control_22_exp_05.tif	33595	33595	0	0	0	1	LatA_7_exp_01.tif	58383	58383	3982.5	31860	0.353047	1	LatA_22_exp_08.tif	50618	50618	1491.75	5967	0.105452
2	Control_7_exp_04.tif	14					122	Control_22_exp_05.tif	30057	30057	0	0	0	2	LatA_7_exp_01.tif	8869					2	LatA_22_exp_08.tif	400
3	Control_7_exp_03.tif	45304	45304	377.333	4528	0.0908653	123	Control_22_exp_04.tif	32000	32000	0	0	0	3	LatA_7_exp_01.tif	1141					3	LatA_22_exp_08.tif	3473
4	Control_7_exp_03.tif	684					124	Control_22_exp_03.tif	27920	27920	0	0	0	4	LatA_7_exp_01.tif	1101					4	LatA_22_exp_08.tif	1260
5	Control_7_exp_03.tif	341					125	Control_22_exp_02.tif	31759	31759	0	0	0	5	LatA_7_exp_01.tif	5844					5	LatA_22_exp_08.tif	834
6	Control_7_exp_03.tif	134					126	Control_22_exp_02.tif	26873	26873	0	0	0	6	LatA_7_exp_01.tif	8472					6	LatA_22_exp_08.tif	19986	19986	1155	8085	0.28802
7	Control_7_exp_03.tif	195					127	Control_22_exp_02.tif	31840	31840	0	0	0	7	LatA_7_exp_01.tif	1561					7	LatA_22_exp_08.tif	1765
8	Control_7_exp_03.tif	337					128	Control_22_exp_01.tif	32417	32417	0	0	0	8	LatA_7_exp_01.tif	1638					8	LatA_22_exp_08.tif	2348
9	Control_7_exp_03.tif	491					129	Control_22_exp_00.tif	38505	38505	283	283	0.00729607	9	LatA_7_exp_01.tif	3234					9	LatA_22_exp_08.tif	973
10	Control_7_exp_03.tif	242					130	Control_22_exp_00.tif	283					10	LatA_7_exp_00.tif	36805	36805	1466.25	5865	0.13745	10	LatA_22_exp_08.tif	492
11	Control_7_exp_03.tif	544					131	Control_22_exp_00.tif	33700	33700	253.286	1773	0.0499817	11	LatA_7_exp_00.tif	634					11	LatA_22_exp_08.tif	633
12	Control_7_exp_03.tif	833					132	Control_22_exp_00.tif	161					12	LatA_7_exp_00.tif	1068					12	LatA_22_exp_08.tif	1002
13	Control_7_exp_03.tif	209					133	Control_22_exp_00.tif	286					13	LatA_7_exp_00.tif	2064					13	LatA_22_exp_08.tif	872
14	Control_7_exp_03.tif	216					134	Control_22_exp_00.tif	146					14	LatA_7_exp_00.tif	2099					14	LatA_22_exp_05.tif	34551	34551	1103.5	4414	0.113281
15	Control_7_exp_03.tif	302					135	Control_22_exp_00.tif	282					15	LatA_7_exp_08.tif	60811	60811	2277.78	20500	0.252118	15	LatA_22_exp_05.tif	1193
16	Control_7_exp_03.tif	71546	71546	379.75	1519	0.0207897	136	Control_22_exp_00.tif	398					16	LatA_7_exp_08.tif	3653					16	LatA_22_exp_05.tif	1344
17	Control_7_exp_03.tif	658					137	Control_22_exp_00.tif	193					17	LatA_7_exp_08.tif	4824					17	LatA_22_exp_05.tif	550
18	Control_7_exp_03.tif	413					138	Control_22_exp_00.tif	307					18	LatA_7_exp_08.tif	4482					18	LatA_22_exp_05.tif	1327
19	Control_7_exp_03.tif	162					139	Control_22_exp_00.tif	57615	57615	865	865	0.0147914	19	LatA_7_exp_08.tif	3360					19	LatA_22_exp_05.tif	19200	19200	575.5	1151	0.0565574
20	Control_7_exp_03.tif	286					140	Control_22_exp_00.tif	865					20	LatA_7_exp_08.tif	2848					20	LatA_22_exp_05.tif	693
21	Control_7_exp_02.tif	28081	28081	232	464	0.016255	141	Control_22_exp_00.tif	3840					21	LatA_7_exp_08.tif	713					21	LatA_22_exp_05.tif	458
22	Control_7_exp_02.tif	261					142	Control_22_exp_00.tif	30886	30886	134.778	1213	0.0377893	22	LatA_7_exp_08.tif	287					22	LatA_22_exp_05.tif	25007	25007	1021.71	7152	0.222395
23	Control_7_exp_02.tif	203					143	Control_22_exp_00.tif	75					23	LatA_7_exp_08.tif	130					23	LatA_22_exp_05.tif	1441
24	Control_7_exp_02.tif	50321	50321	207.143	2900	0.0544898	144	Control_22_exp_00.tif	118					24	LatA_7_exp_08.tif	203					24	LatA_22_exp_05.tif	460
25	Control_7_exp_02.tif	299					145	Control_22_exp_00.tif	124					25	LatA_7_exp_08.tif	44025	44025	2646.12	21169	0.324708	25	LatA_22_exp_05.tif	739
26	Control_7_exp_02.tif	282					146	Control_22_exp_00.tif	97					26	LatA_7_exp_08.tif	5256					26	LatA_22_exp_05.tif	885
27	Control_7_exp_02.tif	128					147	Control_22_exp_00.tif	86					27	LatA_7_exp_08.tif	1504					27	LatA_22_exp_05.tif	2138
28	Control_7_exp_02.tif	126					148	Control_22_exp_00.tif	262					28	LatA_7_exp_08.tif	4099					28	LatA_22_exp_05.tif	737
29	Control_7_exp_02.tif	363					149	Control_22_exp_00.tif	138					29	LatA_7_exp_08.tif	2969					29	LatA_22_exp_05.tif	752
30	Control_7_exp_02.tif	122					150	Control_22_exp_00.tif	190					30	LatA_7_exp_08.tif	2282					30	LatA_22_exp_04.tif	43260	43260	1288.8	6444	0.129648
31	Control_7_exp_02.tif	240					151	Control_22_exp_00.tif	123					31	LatA_7_exp_08.tif	1111					31	LatA_22_exp_04.tif	2981
32	Control_7_exp_02.tif	187					152	Control_22_exp_14.tif	27411	27411	0	0	0	32	LatA_7_exp_08.tif	1663					32	LatA_22_exp_04.tif	1018
33	Control_7_exp_02.tif	144					153	Control_22_exp_13.tif	38847	38847	0	0	0	33	LatA_7_exp_08.tif	2285					33	LatA_22_exp_04.tif	677
34	Control_7_exp_02.tif	249					154	Control_22_exp_13.tif	26857	26857	0	0	0	34	LatA_7_exp_08.tif	34842	34842	450.917	5411	0.134425	34	LatA_22_exp_04.tif	805
35	Control_7_exp_02.tif	248					155	Control_22_exp_12.tif	24061	24061	0	0	0	35	LatA_7_exp_08.tif	543					35	LatA_22_exp_04.tif	963
36	Control_7_exp_02.tif	200					156	Control_22_exp_11.tif	27516	27516	171	171	0.00617618	36	LatA_7_exp_08.tif	372					36	LatA_22_exp_04.tif	37153	37153	551.5	1103	0.0288321
37	Control_7_exp_02.tif	189					157	Control_22_exp_11.tif	171					37	LatA_7_exp_08.tif	343					37	LatA_22_exp_04.tif	532
38	Control_7_exp_02.tif	123					158	Control_22_exp_10.tif	24270	24270	0	0	0	38	LatA_7_exp_08.tif	441					38	LatA_22_exp_04.tif	571
39	Control_7_exp_01.tif	67170	67170	221.25	885	0.0130042	159	Control_22_exp_09.tif	32668	32668	0	0	0	39	LatA_7_exp_08.tif	428					39	LatA_22_exp_10.tif	31629	31629	408	1224	0.0372569
40	Control_7_exp_01.tif	164					160	Control_22_exp_08.tif	29623	29623	0	0	0	40	LatA_7_exp_08.tif	644					40	LatA_22_exp_10.tif	454
41	Control_7_exp_01.tif	128					161	Control_22_exp_08.tif	16812	16812	85	85	0.00503048	41	LatA_7_exp_08.tif	248					41	LatA_22_exp_10.tif	429
42	Control_7_exp_01.tif	327					162	Control_22_exp_08.tif	85					42	LatA_7_exp_08.tif	204					42	LatA_22_exp_10.tif	341
43	Control_7_exp_01.tif	266					163	Control_22_exp_08.tif	12064	12064	0	0	0	43	LatA_7_exp_08.tif	587					43	LatA_22_exp_10.tif	27980	27980	875.5	3502	0.111238
44	Control_7_exp_00.tif	91648	91648	48	48	0.000523469	164	Control_22_exp_07.tif	39010	39010	0	0	0	44	LatA_7_exp_08.tif	205					44	LatA_22_exp_10.tif	1481
45	Control_7_exp_00.tif	48					165	Control_22_exp_06.tif	27585	27585	0	0	0	45	LatA_7_exp_08.tif	1317					45	LatA_22_exp_10.tif	517
46	Control_7_exp_14.tif	48077	48077	0	0	0	166	Control_22_exp_06.tif	26716	26716	0	0	0	46	LatA_7_exp_08.tif	79					46	LatA_22_exp_10.tif	810
47	Control_7_exp_14.tif	56977	56977	0	0	0								47	LatA_7_exp_07.tif	39901	39901	2822.89	25406	0.389024	47	LatA_22_exp_10.tif	694
48	Control_7_exp_14.tif	34914	34914	0	0	0								48	LatA_7_exp_07.tif	8140					48	LatA_22_exp_10.tif	37453	37453	1931.6	9658	0.205005
49	Control_7_exp_14.tif	29009	29009	0	0	0								49	LatA_7_exp_07.tif	521					49	LatA_22_exp_10.tif	2139
50	Control_7_exp_13.tif	46707	46707	42	42	0.000898415								50	LatA_7_exp_07.tif	1933					50	LatA_22_exp_10.tif	2393
51	Control_7_exp_13.tif	42												51	LatA_7_exp_07.tif	1701					51	LatA_22_exp_10.tif	2809
52	Control_7_exp_13.tif	29425	29425	0	0	0								52	LatA_7_exp_07.tif	7451					52	LatA_22_exp_10.tif	1655
53	Control_7_exp_13.tif	31600	31600	0	0	0								53	LatA_7_exp_07.tif	1145					53	LatA_22_exp_10.tif	662
54	Control_7_exp_12.tif	41213	41213	0	0	0								54	LatA_7_exp_07.tif	1236					54	LatA_22_exp_11.tif	22762	22762	1688.4	8442	0.270542
55	Control_7_exp_12.tif	34837	34837	0	0	0								55	LatA_7_exp_07.tif	609					55	LatA_22_exp_11.tif	3184
56	Control_7_exp_11.tif	59756	59756	230.312	3685	0.0580855								56	LatA_7_exp_07.tif	2670					56	LatA_22_exp_11.tif	1266
57	Control_7_exp_11.tif	283												57	LatA_7_exp_07.tif	26622	26622	452.412	7691	0.224142	57	LatA_22_exp_11.tif	500
58	Control_7_exp_11.tif	544												58	LatA_7_exp_07.tif	914					58	LatA_22_exp_11.tif	728
59	Control_7_exp_11.tif	748												59	LatA_7_exp_07.tif	298					59	LatA_22_exp_11.tif	2764
60	Control_7_exp_11.tif	204												60	LatA_7_exp_07.tif	250					60	LatA_22_exp_11.tif	21991	21991	1102.33	6614	0.231218
61	Control_7_exp_11.tif	109												61	LatA_7_exp_07.tif	85					61	LatA_22_exp_11.tif	818
62	Control_7_exp_11.tif	122												62	LatA_7_exp_07.tif	193					62	LatA_22_exp_11.tif	359
63	Control_7_exp_11.tif	134												63	LatA_7_exp_07.tif	665					63	LatA_22_exp_11.tif	693
64	Control_7_exp_11.tif	95												64	LatA_7_exp_07.tif	287					64	LatA_22_exp_11.tif	1803
65	Control_7_exp_11.tif	99												65	LatA_7_exp_07.tif	180					65	LatA_22_exp_11.tif	2533
66	Control_7_exp_11.tif	187												66	LatA_7_exp_07.tif	233					66	LatA_22_exp_11.tif	408
67	Control_7_exp_11.tif	281												67	LatA_7_exp_07.tif	56					67	LatA_22_exp_00.tif	50802	50802	7912.33	23737	0.318451
68	Control_7_exp_11.tif	169												68	LatA_7_exp_07.tif	194					68	LatA_22_exp_00.tif	16150
69	Control_7_exp_11.tif	198												69	LatA_7_exp_07.tif	1123					69	LatA_22_exp_00.tif	4029
70	Control_7_exp_11.tif	241												70	LatA_7_exp_07.tif	1508					70	LatA_22_exp_00.tif	3558
71	Control_7_exp_11.tif	109												71	LatA_7_exp_07.tif	355					71	LatA_22_exp_00.tif	30939	30939	2097.83	12587	0.289183
72	Control_7_exp_11.tif	162												72	LatA_7_exp_07.tif	282					72	LatA_22_exp_00.tif	4059
73	Control_7_exp_11.tif	31770	31770	302.75	1211	0.0367181								73	LatA_7_exp_07.tif	821					73	LatA_22_exp_00.tif	2138
74	Control_7_exp_11.tif	396												74	LatA_7_exp_07.tif	247					74	LatA_22_exp_00.tif	993
75	Control_7_exp_11.tif	458												1	LatA_7_exp_05.tif	31611	31611	1643	6572	0.172118	75	LatA_22_exp_00.tif	1924
76	Control_7_exp_11.tif	162												2	LatA_7_exp_05.tif	1923					76	LatA_22_exp_00.tif	2117
77	Control_7_exp_11.tif	195												3	LatA_7_exp_05.tif	1734					77	LatA_22_exp_00.tif	1356
78	Control_7_exp_11.tif	87867	87867	0	0	0								4	LatA_7_exp_05.tif	2303					78	LatA_22_exp_02.tif	32322	32322	1986.57	13906	0.300813
79	Control_7_exp_11.tif	47469	47469	0	0	0								5	LatA_7_exp_05.tif	612					79	LatA_22_exp_02.tif	1570
80	Control_7_exp_10.tif	61274	61274	0	0	0								6	LatA_7_exp_05.tif	56415	56415	2275.6	11378	0.167834	80	LatA_22_exp_02.tif	4692
81	Control_7_exp_10.tif	43419	43419	0	0	0								7	LatA_7_exp_05.tif	3267					81	LatA_22_exp_02.tif	1904
82	Control_7_exp_09.tif	41660	41660	0	0	0								8	LatA_7_exp_05.tif	489					82	LatA_22_exp_02.tif	1831
83	Control_7_exp_09.tif	33361	33361	0	0	0								9	LatA_7_exp_05.tif	631					83	LatA_22_exp_02.tif	1254
84	Control_7_exp_08.tif	56433	56433	410.727	4518	0.0741251								10	LatA_7_exp_05.tif	472					84	LatA_22_exp_02.tif	1321
85	Control_7_exp_08.tif	394												11	LatA_7_exp_05.tif	6519					85	LatA_22_exp_02.tif	1334
86	Control_7_exp_08.tif	812												12	LatA_7_exp_05.tif	41465	41465	910.625	7285	0.149436	86	LatA_22_exp_02.tif	25534	25534	3677.83	22067	0.463583
87	Control_7_exp_08.tif	418												13	LatA_7_exp_05.tif	1429					87	LatA_22_exp_02.tif	7179
88	Control_7_exp_08.tif	325												14	LatA_7_exp_05.tif	702					88	LatA_22_exp_02.tif	1971
89	Control_7_exp_08.tif	275												15	LatA_7_exp_05.tif	1047					89	LatA_22_exp_02.tif	5863
90	Control_7_exp_08.tif	365												16	LatA_7_exp_05.tif	291					90	LatA_22_exp_02.tif	1820
91	Control_7_exp_08.tif	560												17	LatA_7_exp_05.tif	485					91	LatA_22_exp_02.tif	3561
92	Control_7_exp_08.tif	226												18	LatA_7_exp_05.tif	807					92	LatA_22_exp_02.tif	1673
93	Control_7_exp_08.tif	194												19	LatA_7_exp_05.tif	2074					93	LatA_22_exp_01.tif	39007	39007	9581	9581	0.197189
94	Control_7_exp_08.tif	407												20	LatA_7_exp_05.tif	450					94	LatA_22_exp_01.tif	9581
95	Control_7_exp_08.tif	542												21	LatA_7_exp_05.tif	29132	29132	1936.17	11617	0.285087	95	LatA_22_exp_09.tif	43347	43347	3426.29	23984	0.35621
96	Control_7_exp_07.tif	69885	69885	0	0	0								22	LatA_7_exp_05.tif	3506					96	LatA_22_exp_09.tif	2867
97	Control_7_exp_07.tif	38042	38042	0	0	0								23	LatA_7_exp_05.tif	3384					97	LatA_22_exp_09.tif	2418
98	Control_7_exp_06.tif	111848	111848	230	1380	0.0121878								24	LatA_7_exp_05.tif	2203					98	LatA_22_exp_09.tif	2716
99	Control_7_exp_06.tif	332												25	LatA_7_exp_05.tif	323					99	LatA_22_exp_09.tif	6544
100	Control_7_exp_06.tif	376												26	LatA_7_exp_05.tif	680					100	LatA_22_exp_09.tif	4443
101	Control_7_exp_06.tif	222												27	LatA_7_exp_05.tif	1521					101	LatA_22_exp_09.tif	3761
102	Control_7_exp_06.tif	165												28	LatA_7_exp_06.tif	31045	31045	734.125	5873	0.159082	102	LatA_22_exp_09.tif	1235
103	Control_7_exp_06.tif	160												29	LatA_7_exp_06.tif	1819					103	LatA_22_exp_07.tif	31705	31705	1152	3456	0.0982907
104	Control_7_exp_06.tif	125												30	LatA_7_exp_06.tif	701					104	LatA_22_exp_07.tif	512
105	Control_7_exp_06.tif	47673	47673	0	0	0								31	LatA_7_exp_06.tif	403					105	LatA_22_exp_07.tif	487
106	Control_7_exp_06.tif	75863	75863	73	292	0.00383429								32	LatA_7_exp_06.tif	382					106	LatA_22_exp_07.tif	2457
107	Control_7_exp_06.tif	80												33	LatA_7_exp_06.tif	650					107	LatA_22_exp_06.tif	34812	34812	5231	5231	0.130635
108	Control_7_exp_06.tif	126												34	LatA_7_exp_06.tif	243					108	LatA_22_exp_06.tif	5231
109	Control_7_exp_06.tif	43												35	LatA_7_exp_06.tif	674					109	LatA_22_exp_03.tif	36769	36769	1276	3828	0.0942927
110	Control_7_exp_06.tif	43												36	LatA_7_exp_06.tif	1001					110	LatA_22_exp_03.tif	1318
111	Control_7_exp_05.tif	35529	35529	245	245	0.00684855								37	LatA_7_exp_06.tif	57817	57817	1493.33	13440	0.188613	111	LatA_22_exp_03.tif	1750
112	Control_7_exp_05.tif	245												38	LatA_7_exp_06.tif	2279					112	LatA_22_exp_03.tif	760
113	Control_7_exp_05.tif	70667	70667	198.286	1388	0.0192631								39	LatA_7_exp_06.tif	1438
114	Control_7_exp_05.tif	263												40	LatA_7_exp_06.tif	1346
115	Control_7_exp_05.tif	141												41	LatA_7_exp_06.tif	2393
116	Control_7_exp_05.tif	149												42	LatA_7_exp_06.tif	815
117	Control_7_exp_05.tif	362												43	LatA_7_exp_06.tif	405
118	Control_7_exp_05.tif	147												44	LatA_7_exp_06.tif	1540
119	Control_7_exp_05.tif	210												45	LatA_7_exp_06.tif	535
120	Control_7_exp_05.tif	116												46	LatA_7_exp_06.tif	2689
														47	LatA_7_exp_02.tif	43809	43809	3793.25	30346	0.409224
														48	LatA_7_exp_02.tif	5722
														49	LatA_7_exp_02.tif	5398
														50	LatA_7_exp_02.tif	5253
														51	LatA_7_exp_02.tif	1034
														52	LatA_7_exp_02.tif	2576
														53	LatA_7_exp_02.tif	2614
														54	LatA_7_exp_02.tif	3418
														55	LatA_7_exp_02.tif	4331
														56	LatA_7_exp_03.tif	37725	37725	3802	19010	0.335067
														57	LatA_7_exp_03.tif	6164
														58	LatA_7_exp_03.tif	8986
														59	LatA_7_exp_03.tif	1116
														60	LatA_7_exp_03.tif	1162
														61	LatA_7_exp_03.tif	1582
														62	LatA_7_exp_03.tif	40428	40428	2309	13854	0.255223
														63	LatA_7_exp_03.tif	5225
														64	LatA_7_exp_03.tif	3083
														65	LatA_7_exp_03.tif	1573
														66	LatA_7_exp_03.tif	1347
														67	LatA_7_exp_03.tif	1172
														68	LatA_7_exp_03.tif	1454
														69	LatA_7_exp_03.tif	50427	50427	2763.67	8291	0.1412
														70	LatA_7_exp_03.tif	4651
														71	LatA_7_exp_03.tif	2301
														72	LatA_7_exp_03.tif	1339
														73	LatA_7_exp_04.tif	44816	44816	2138.75	17110	0.276298
														74	LatA_7_exp_04.tif	5331
														75	LatA_7_exp_04.tif	3453
														76	LatA_7_exp_04.tif	1834
														77	LatA_7_exp_04.tif	2118
														78	LatA_7_exp_04.tif	1295
														79	LatA_7_exp_04.tif	1669
														80	LatA_7_exp_04.tif	624
														81	LatA_7_exp_04.tif	786
														82	LatA_7_exp_04.tif	41243	41243	2452	2452	0.0561163
														83	LatA_7_exp_04.tif	2452
														84	LatA_7_exp_04.tif	10003	10003	894	2682	0.211431
														85	LatA_7_exp_04.tif	907
														86	LatA_7_exp_04.tif	650
														87	LatA_7_exp_04.tif	1125
														88	LatA_7_exp_04.tif	31313	31313	581.714	8144	0.206402
														89	LatA_7_exp_04.tif	956
														90	LatA_7_exp_04.tif	565
														91	LatA_7_exp_04.tif	1047
														92	LatA_7_exp_04.tif	767
														93	LatA_7_exp_04.tif	419
														94	LatA_7_exp_04.tif	874
														95	LatA_7_exp_04.tif	533
														96	LatA_7_exp_04.tif	730
														97	LatA_7_exp_04.tif	412
														98	LatA_7_exp_04.tif	335
														99	LatA_7_exp_04.tif	460
														100	LatA_7_exp_04.tif	305
														101	LatA_7_exp_04.tif	461
														102	LatA_7_exp_04.tif	280

## Sheet: Bleb_area plots
Cell body area (µm²)	control_22	Lat_22	control_7	Lat_7	Mean bleb (µm²)	control_22	Lat_22	control_7	Lat_7	Tot. bleb (µm²)	control_22	Lat_22	control_7	Lat_7	Fraction	control_22	Lat_22	control_7	Lat_7
	141.939	213.861	170.153	246.668		0	6.30264	0.05915	16.8261		0	25.2106	0.05915	134.609		0	0.105452	0.000347507	0.353047
	126.991	84.4409	191.409	155.501		0	4.87988	1.59423	6.19491		0	34.1591	19.1308	24.7796		0	0.28802	0.0908653	0.13745
	135.2	145.978	302.282	256.926		0	4.66229	1.60444	9.62361		0	18.6492	6.41777	86.6125		0	0.113281	0.0207897	0.252118
	117.962	81.12	118.642	186.006		0	2.43149	0.9802	11.1799		0	4.86297	1.9604	89.439		0	0.0565574	0.016255	0.324708
	134.182	105.655	212.606	147.207		0	4.31674	0.875179	1.90512		0	30.2172	12.2525	22.8615		0	0.222395	0.0544898	0.134425
	113.538	182.774	283.793	168.582		0	5.44518	0.934781	11.9267		0	27.2259	3.73913	107.34		0	0.129648	0.0130042	0.389024
	134.524	156.971	387.213	112.478		0	2.33009	0.2028	1.91144		0	4.66018	0.2028	32.4945		0	0.0288321	0.000523469	0.224142
	136.962	133.633	203.125	133.556		0	1.7238	0	6.94168		0	5.1714	0	27.7667		0	0.0372569	0	0.172118
	162.684	118.216	240.728	238.353		1.19568	3.69899	0	9.61441		1.19568	14.7959	0	48.0721		0.00729607	0.111238	0	0.167834
	142.382	158.239	147.512	175.19		1.07013	8.16101	0	3.84739		7.49093	40.8051	0	30.7791		0.0499817	0.205005	0	0.149436
	243.423	96.1694	122.563	123.083		3.65463	7.13349	0	8.1803		3.65463	35.6675	0	49.0818		0.0147914	0.270542	0	0.285087
	130.493	92.912	197.337	131.165		0.569436	4.65736	0.17745	3.10168		5.12493	27.9442	0.17745	24.8134		0.0377893	0.231218	0.000898415	0.159082
	115.811	214.638	124.321	244.277		0	33.4296	0	6.30933		0	100.289	0	56.784		0	0.318451	0	0.188613
	164.129	130.717	133.51	185.093		0	8.86335	0	16.0265		0	53.1801	0	128.212		0	0.289183	0	0.409224
	113.471	136.56	174.125	159.388		0	8.39326	0	16.0634		0	58.7529	0	80.3173		0	0.300813	0	0.335067
	101.658	107.881	147.186	170.808		0	15.5388	0	9.75553		0	93.2331	0	58.5331		0	0.463583	0	0.255223
	116.255	164.805	252.469	213.054		0.722475	40.4797	0.97307	11.6765		0.722475	40.4797	15.5691	35.0295		0.00617618	0.197189	0.0580855	0.1412
	102.541	183.141	134.228	189.348		0	14.4761	1.27912	9.03622		0	101.332	5.11648	72.2898		0	0.35621	0.0367181	0.276298
	138.022	133.954	371.238	174.252		0	4.8672	0	10.3597		0	14.6016	0	10.3597		0	0.0982907	0	0.0561163
	125.157	147.081	200.557	42.2627		0	22.101	0	3.77715		0	22.101	0	11.3315		0	0.130635	0	0.211431
	71.0307	155.349	258.883	132.297		0.359125	5.3911	0	2.45774		0.359125	16.1733	0	34.4084		0.00503048	0.0942927	0	0.206402
	50.9704		183.445			0		0			0		0			0		0
	164.817		176.014			0		0			0		0			0		0
	116.547		140.95			0		0			0		0			0		0
	112.875		238.429			0		1.73532			0		19.0886			0		0.0741251
			295.264					0					0					0
			160.727					0					0					0
			472.558					0.97175					5.8305					0.0121878
			201.418					0					0					0
			320.521					0.308425					1.2337					0.00383429
			150.11					1.03513					1.03513					0.00684855
			298.568					0.837757					5.8643					0.0192631
