# Supplementary material for: A mechano-osmotic feedback couples cell volume to the rate of cell deformation
Source: eLife journal article supplement (doi:10.7554/elife.72381), 2022-04-13
Supplement: supp [file raw.xlsx]

## Sheet: iso
1	1	1	1	2	2	2	2	2	3	3	3	3	3	3	4	4	4	4	4	4	4	4	5	5	5	5	5	5	5	5	5	6	6	6	6	6	6	6	6	7	7	7	7	7	7	7	7	7	7
100	100	100	100	100	100	100	100	100	100	100	100	100	100	100	100	100	100	100	100	100	100	100	100	100	100	100	100	100	100	100	100	100	100	100	100	100	100	100	100	100	100	100	100	100	100	100	100	100	100
100.061	99.9767	101.028	100.934	100.239	101.076	99.7942	100.043	101.196	100.181	99.8155	98.9786	100.587	99.5923	100.699	98.9079	100.66	101.03	99.1626	100.349	101.097	100.108	99.527	99.2637	99.6519	101.821	99.2083	99.4031	100.773	98.5499	100.311	100.476	99.4224	100.674	101.188	99.6083	98.6084	98.8943	99.322	100.804	99.6768	100.131	100.683	99.7317	99.4826	100.01	100.888	100.302	99.3166	100.126
99.4517	99.8589	101.631	101.103	100.454	101.764	98.9077	98.9638	100.482	100.836	100.779	100.135	101.507	101.435	102.295	99.2685	100.64	100.855	99.0817	99.4344	101.187	99.272	99.35	99.3604	100.563	100.848	99.4162	99.5563	100.618	99.9831	100.569	100.341	98.5779	100.673	102.297	100.274	98.8127	98.9248	99.2348	101.023	99.7672	100.679	100.048	100.389	99.0041	100.11	101.15	101.3	100.412	99.8685
98.942	99.8647	102.134	101.648	100.265	103.023	99.5515	98.6659	100.147	101.688	101.136	100.822	102.438	100.024	101.195	99.204	100.154	101.176	99.324	99.3194	101.083	99.9285	98.5639	99.8036	99.8164	100.129	98.985	99.0524	100.909	99.8793	100.041	100.064	99.0682	100.07	101.684	100.752	98.1499	98.8484	99.2095	101.12	99.0395	101.591	99.8275	100.614	98.9227	99.5073	101.99	101.602	101.218	100.151
99.3082	100.822	101.834	102.787	100.505	103.384	99.7416	97.6538	100.657	102.146	101.855	101.522	102.49	98.74	101.489	98.7227	100.065	101.38	98.5928	99.674	101.581	98.9091	97.7398	99.5613	99.3836	101.027	99.0077	99.6253	102.551	100.398	99.6663	101.466	98.3729	100.664	102.586	100.48	98.3997	98.889	99.6767	99.8715	98.9385	101.527	98.5589	101.062	98.7011	99.1985	101.7	101.716	101.298	100.3
98.1409	100.551	102.974	102.295	100.525	103.958	99.0059	96.9929	99.8506	103.094	101.42	101.825	102.079	100.7	101.839	99.01	99.966	101.053	98.6288	99.0172	101.433	99.9811	98.1773	100.131	99.2488	101.074	99.4284	99.3348	101.204	99.6128	99.9517	101.985	98.7995	100.976	102.067	100.389	98.5012	99.5492	99.9331	100.291	98.321	101.961	96.9989	100.515	98.5309	99.112	102.447	102.174	101.717	100.677
98.4109	101.102	103.17	102.431	101.063	103.94	98.5203	97.1841	99.7021	102.526	102.284	102.024	102.756	100.201	102.243	98.8784	99.3006	101.627	98.9551	98.8109	101.917	100.299	97.8797	99.7399	98.9025	100.934	99.2758	99.4082	101.504	99.9336	100.319	101.292	98.9152	101.535	101.639	100.642	99.5274	100.577	99.6488	99.9035	97.8943	102.777	98.2464	101.424	98.1418	99.1157	102.512	101.951	101.342	100.007
98.0212	100.667	104.657	103.312	101.323	104.824	97.9571	96.0916	100.765	102.691	101.874	101.607	102.069	99.6499	101.858	98.7255	98.2942	101.708	98.428	99.2449	101.583	100.568	98.0261	98.6318	99.5397	100.855	99.9783	99.3763	101.206	100.798	99.9521	102.241	99.3063	101.909	101.863	100.722	98.7352	100.243	99.1487	100.738	97.4787	103.171	97.7177	101.993	98.8293	99.5124	102.591	101.82	102.14	100.183
97.6538	101.097	104.22	103.916	100.74	105.059	97.194	96.6121	99.1848	103.015	101.819	101.287	101.686	97.5171	101.243	98.6866	99.2419	101.01	98.1137	98.7324	101.251	99.8457	97.4884	99.4452	98.6654	99.9631	99.3873	99.2253	101.522	100.003	99.5495	101.155	98.3815	101.862	102.251	100.454	99.4303	100.492	99.7358	100.613	97.4826	102.853	96.742	102.649	98.8843	97.6557	102.972	102.938	101.343	100.807
98.2534	100.641	105.214	105.239	100.306	104.287	95.9766	96.9352	99.9711	103.175	102.245	101.476	101.564	99.3571	101.146	99.3271	98.6736	101.579	98.5773	99.0278	101.654	100.104	98.52	99.5845	98.3286	100.085	98.715	99.5895	102.808	101.106	100.071	100.845	98.2135	102.33	102.797	100.609	99.0171	101.564	99.4458	100.685	96.3692	104.23	96.2084	101.916	98.2126	97.8785	103.618	102.097	101.331	100.992
98.462	101.105	106.822	107.345	100.851	101.063	100.787	98.3137	101.072	102.467	100.5	99.209	107.951	94.8816	96.2213	101.696	98.0626	104.955	99.0099	100.101	103.106	101.101	99.8412	101.447	98.7766	101.558	98.7462	102.88	107.368	102.023	98.2239	104.593	102.443	102.821	102.981	101.734	101.847	104.37	97.9918	101.381	97.9544	106.993	98.5486	102.517	101.112	97.8839	105.406	105.89	102.345	102.702
98.2021	101.17	107.599	108.071	101.573	102.246	102.619	99.0346	102.145	102.867	101.052	99.8091	109.298	95.4023	96.4551	101.545	99.2441	105.248	100.224	100.058	104.243	101.798	101.145	102.204	99.5295	101.835	99.6872	103.578	107.6	102.283	98.4877	103.068	102.105	104.019	103.947	102.794	102.468	103.698	98.6427	101.583	97.8401	107.857	96.8796	102.645	101.495	98.0191	106.8	105.779	102.643	102.687
98.7267	102.194	108.206	109.507	102.757	102.322	100.935	98.2463	103.171	103.468	100.866	100.015	108.466	95.5128	96.0029	102.581	99.1106	107.02	101.083	101.14	105.55	103.164	102.247	101.825	99.2133	101.95	99.1467	104.399	108.387	102.404	98.2171	103.765	103.633	104.254	103.893	103.132	103.42	104.378	98.275	102.228	98.2355	108.234	98.0955	102.181	101.478	98.2057	107.159	106.304	103.385	104.389
98.1832	102.437	108.964	109.816	102.284	103.312	101.481	98.3982	103.728	103.572	100.965	99.7728	109.014	95.655	96.4335	102.18	99.5397	106.313	101.137	100.986	105.379	102.73	102.991	102.686	98.9663	102.506	99.8916	103.247	109.129	102.662	98.9526	102.96	103.541	104.641	104.676	102.883	103.24	104.003	98.1147	101.984	98.1734	109.282	99.9275	102.608	101.549	97.6432	108.386	106.568	103.059	103.567
98.495	101.908	109.363	111.082	102.697	103.111	100.366	97.5008	102.641	104.059	101.174	100.128	108.338	95.419	97.458	102.577	98.9932	106.498	102.101	101.538	105.61	102.051	103.309	101.987	99.2219	103.22	99.1513	103.848	109.085	101.471	99.006	102.269	103.987	104.926	106.061	103.043	102.053	104.318	98.2871	102.255	99.0107	110.075	99.2827	102.736	101.739	97.4605	108.381	107.562	103.782	103.585
98.1191	101.394	108.831	112.206	102.554	103.609	100.299	97.3396	103.305	104.339	100.901	100.519	107.385	96.0634	98.6073	103.068	99.1032	106.755	101.415	101.833	105.327	102.663	103.736	102.56	99.7083	101.518	99.0976	104.364	109.873	101.858	99.2153	102.382	103.549	105.98	104.857	103.355	101.348	104.093	98.4259	101.658	99.7258	110.164	99.7301	103.284	101.3	96.926	108.518	107.839	103.357	104.188
97.6639	101.555	109.164	111.479	101.706	103.522	100.921	98.0767	103.718	104.683	100.318	100.741	107.39	96.2114	98.9945	103.195	99.0394	105.634	100.919	101.778	105.951	102.038	103.294	103.215	99.2193	102.542	99.0303	103.75	109.896	101.2	98.3779	102.848	103.749	106.199	105.06	102.995	102.567	105.466	98.121	101.391	99.7964	110.788	100.24	103.393	101.266	96.3116	108.731	106.904	102.824	104.295
97.6788	101.402	109.289	112.732	102.139	104.562	100.633	97.578	104.045	104.159	100.903	99.9742	107.613	96.5732	100.152	103.382	98.7826	105.465	101.126	101.86	104.868	102.173	103.469	103.348	98.8165	103.19	99.1562	103.84	110.261	102.004	99.0342	102.802	103.823	106.017	104.094	102.886	101.809	105.696	97.6291	102.145	100.464	111.422	100.188	104.009	101.629	96.556	109.28	106.862	102.548	103.742
98.4049	101.143	109.673	112.891	102.993	105.187	99.7285	97.5895	104.797	104.663	100.01	100.059	106.836	96.6072	99.4801	104.087	97.2946	105.04	100.358	101.833	105.707	102.369	103.14	101.218	99.2795	101.863	99.034	102.978	110.599	101.166	99.706	102.277	103.081	106.969	104.926	103.01	101.51	104.8	97.0136	102.414	100.998	111.658	99.4279	106.116	101.766	96.1325	109.365	106.379	102.844	104.13
97.6701	101.034	110.227	113.287	101.834	105.611	100.456	97.1236	104.334	104.972	99.3509	98.6452	108.047	96.1574	100.717	103.826	97.5644	105.42	99.843	101.177	104.364	101.492	102.213	102.186	99.3618	102.092	98.6085	102.224	110.508	102.031	98.9544	102.769	102.707	107.218	105.051	103.145	102.086	104.446	96.5624	103.215	100.694	112.285	100.485	104.535	101.522	95.3799	108.79	107.282	103.111	104.438
97.8066	100.78	110.602	113.274	101.567	105.071	101.5	97.4592	104.581	104.212	100.425	98.6901	108.92	96.6169	100.366	104.825	96.8914	104.988	100.675	101.795	104.441	102.081	101.597	101.716	99.6462	102.077	99.7981	102.097	110.738	101.313	99.0699	102.981	102.346	107.554	104.991	103.127	102.657	105.756	96.5367	102.475	101.865	113.157	101.515	104.113	101.353	95.1164	108.879	108.002	102.556	104.875
97.07	100.747	110.022	114.492	101.387	105.624	102.393	97.0555	103.79	105.373	99.2388	98.4985	108.613	96.6627	100.575	104.744	98.1034	104.352	100.81	101.746	104.631	102.464	101.694	101.479	99.2952	101.301	99.3982	101.279	111.493	100.882	99.4095	102.794	102.116	107.796	104.033	102.553	102.987	105.414	97.1783	102.542	102.049	113.45	101.383	104.901	101.137	94.0399	108.433	107.6	102.815	104.325
97.4597	100.373	109.371	115.571	100.669	106.634	101.369	97.3637	104.184	105.448	98.7122	98.898	108.085	95.9032	101.321	104.466	96.9582	104.706	99.5725	101.964	104.053	102.16	101.296	101.75	99.1005	101.32	99.6057	101.143	110.728	101.29	98.7209	102.568	102.322	107.701	103.617	101.767	102.897	106.047	95.7562	103.444	102.076	112.501	101.067	105.211	101.775	94.7501	108.794	107.303	103.32	104.541
96.7946	100.399	109.648	115.421	100.69	106.239	102.928	97.8565	104.182	105.877	99.1857	97.4774	106.96	95.8092	101.342	105.55	97.197	104.517	98.5675	102.238	104.033	102.91	100.88	102.694	99.0311	101.311	98.8772	100.047	111.342	100.076	98.6052	103.005	100.828	108.162	105.255	102.062	102.952	105.933	95.4956	103.405	102.621	113.696	101.705	105.845	101.808	93.6989	107.951	107.306	102.985	106.023
96.5832	100.823	109.372	115.098	100.134	106.737	103.578	97.4954	102.905	105.837	99.0637	96.1463	107.241	96.0656	102.298	105.493	96.8886	104.48	98.0913	102.176	103.444	101.864	100.283	102.303	98.7521	102.452	98.9782	101.237	111.384	100.353	99.3352	103.695	101.184	108.363	105.452	102.455	103.176	105.637	95.9357	103.064	102.971	113.21	101.739	105.227	101.658	94.0007	108.558	106.828	102.438	104.951
97.4521	100.252	109.711	115.688	99.3142	106.517	102.286	98.2703	103.364	105.372	98.6367	95.2143	107.456	96.1236	100.749	105.54	96.1637	103.808	98.2179	101.274	104.025	102.495	100.583	102.098	99.8182	101.712	99.9844	101.029	111.725	100.239	100.074	103.417	100.987	108.447	103.852	101.599	102.907	105.463	95.6491	103.527	102.909	113.774	102.71	106.097	101.658	93.5392	108.577	105.853	102.225	105.686
97.1382	100.088	110.579	115.106	99.7239	106.949	102.644	97.5188	102.433	106.285	98.2049	94.7894	107.846	95.527	100.447	105.515	96.9201	103.864	98.1939	101.608	103.709	102.702	100.046	102.423	99.1593	101.277	98.6073	101.093	111.497	99.6059	99.2066	103.642	100.037	108.491	103.718	101.613	103.447	106.951	95.171	103.298	103.337	113.74	103.339	106.188	101.559	93.2472	107.799	105.95	102.666	105.951
97.043	99.9948	110.048	115.374	98.7196	107.104	102.358	98.4983	102.584	107.122	98.0777	94.9392	108.443	95.4802	101.746	105.437	96.4878	104.618	97.4966	101.205	103.653	102.073	99.2549	102.569	98.5676	101.007	99.1265	100.854	111.934	99.2357	98.8425	104.66	100.193	108.752	102.963	101.525	105.582	106.563	94.9957	104.005	103.717	113.913	104.167	106.974	102.199	92.6074	107.541	105.992	102.167	105.394
97.1731	99.2842	110.296	116.265	99.0414	108.177	103.003	97.2163	102.378	106.464	98.106	94.0241	108.164	95.2409	100.859	106.005	96.6663	103.505	97.761	100.923	102.761	101.182	99.2858	102.498	98.8691	101.208	99.2875	100.239	111.46	99.7654	98.8915	104.269	100.613	108.368	104.529	100.555	104.816	105.145	95.5501	104.482	103.456	114.777	104.292	106.789	102.265	93.3815	107.625	104.615	102.362	105.732
96.3052	99.594	109.847	116.783	99.147	108.15	104.309	97.84	102.84	106.519	97.9022	93.5391	109.245	94.9186	101.141	105.905	96.2264	104.187	97.9034	100.771	104.032	102.365	99.2882	101.916	99.7577	101.075	98.9895	100.763	111.866	97.9543	99.8786	104.477	99.1223	108.828	102.76	100.754	104.827	105.465	95.7518	103.751	103.696	114.597	103.419	106.397	102.524	93.1048	107.011	105.167	102.457	105.812
95.688	99.5632	109.769	115.078	98.3367	108.057	103.841	98.0266	102.916	106.085	97.5829	92.9446	108.333	94.9216	100.453	105.481	96.4248	104.416	97.7554	101.579	102.995	101.877	99.1966	101.938	99.2302	100.711	99.1964	100.048	111.862	99.669	99.6421	104.402	99.8842	109.273	102.585	100.898	105.917	106.165	94.8792	104.506	103.632	114.483	103.574	106.834	101.877	92.9895	106.987	105.11	102.142	106.371
97.3537	98.3789	109.65	116.802	98.4381	108.815	103.138	98.4465	102.92	106.777	98.1877	91.818	108.52	95.5972	101.472	105.49	95.9537	104.029	97.5884	101.673	102.077	101.158	99.3738	102.159	98.5168	99.768	99.3973	100.261	111.97	98.6617	99.6797	105.867	99.3404	109.834	102.184	100.066	106.122	105.821	94.7894	104.047	103.875	114.689	104.205	107.114	101.942	93.5032	106.838	104.274	102.687	106.219
96.9969	99.1239	110.041	116.569	98.0028	108.154	104.137	98.6433	102.092	107.264	97.5895	92.2748	109.139	95.8126	99.8926	104.628	95.5216	104.725	97.3493	100.505	102.865	102.182	98.7006	102.572	98.7694	99.6957	99.5236	99.9905	111.858	98.3069	98.9397	105.579	98.7267	109.662	102.99	100.178	105.585	105.378	95.4078	104.899	103.877	114.687	104.939	106.495	102.097	93.1868	106.862	104.939	102.073	106.884
97.2842	99.0276	108.991	115.755	97.151	108.463	103.639	98.7376	102.652	107.141	97.9431	92.1719	108.519	95.4792	101.076	104.931	95.1277	103.845	95.856	100.763	102.53	102.197	98.406	101.592	98.7302	100.066	100.105	99.7153	112.818	98.1852	98.9962	104.698	98.943	110.573	102.984	100.095	105.456	104.54	94.5622	104.149	103.879	114.928	104.319	106.406	102.502	93.1762	106.283	104.931	102.376	106.285
96.6453	98.7397	108.581	116.262	96.8092	108.315	103.974	98.867	102.562	107.149	98.1348	90.8482	108.682	96.3471	101.406	104.97	94.2385	103.27	96.8614	100.743	102.245	101.948	97.9458	102.181	98.5937	100.217	99.6664	100.336	111.755	98.2283	99.2575	105.109	99.6814	110.628	103.142	100.264	106.363	106.525	94.4571	105.004	104.208	115.116	105.8	106.898	102.415	92.7039	106.281	104.885	102.587	107.274
95.4358	98.9873	109.774	115.163	97.0207	109.869	103.321	99.1276	102.805	107.445	96.8838	91.0631	108.846	95.9849	100.717	105.315	94.914	103.857	96.8264	101.482	102.529	102.948	97.4349	102.098	98.3748	100.121	99.6269	99.7972	112.147	98.143	97.5549	105.212	98.7325	110.48	103.05	99.5268	105.851	105.192	95.1228	104.02	104.336	114.96	105.449	106.766	101.82	92.5032	105.882	105.082	102.33	106.943
96.9127	98.9142	108.839	115.282	96.3945	109.692	102.973	98.181	102.358	107.132	96.9275	91.4367	109.189	95.2564	101.487	104.255	94.5727	104.08	96.6336	99.994	102.625	102.159	96.9348	101.888	98.269	99.6995	99.6125	100.148	112.871	98.2522	98.8635	105.612	99.1733	109.821	101.232	98.7285	105.898	105.349	94.5829	104.682	104.259	114.965	105.435	105.608	102.499	93.0852	106.209	105.129	102.899	107.17
95.9312	98.8316	109.378	115.353	96.5868	109.364	103.537	98.5055	102.488	106.7	96.5779	90.5438	109.216	95.9019	101.098	104.219	94.3972	103.234	96.4196	100.683	102.333	101.691	97.4795	102.018	98.7259	100.043	100.126	99.7134	112.615	98.9943	98.415	106.101	98.5309	110.1	103.216	99.4644	105.873	105.582	94.8931	104.435	104.29	114.73	105.156	106.493	101.27	92.9894	106.242	105.6	102.956	107.396
95.6806	98.1738	109.049	114.357	96.2519	109.288	104.379	98.9703	102.566	106.856	97.5502	91.4687	109.045	95.5311	101.705	103.99	93.9647	103.761	96.0191	100.519	101.615	102.23	97.0011	101.34	98.0702	100.062	99.8101	99.7722	112.727	99.4041	97.3532	105.53	98.4419	109.86	102.382	98.3834	106.143	106.998	94.3898	104.338	104.953	114.451	105.639	106.091	101.941	92.0125	106.19	105.294	102.623	107.815
96.3052	97.9647	108.405	114.016	96.17	109.948	104.138	99.2653	103.297	106.979	97.0018	91.593	108.794	95.429	101.876	103.393	93.9931	103.088	95.3271	100.011	101.682	101.583	96.8808	101.924	98.0222	100.63	100.327	99.4971	113.289	98.2972	97.2037	105.432	99.6386	110.018	102.794	98.0437	106.037	106.488	94.2362	104.834	104.067	114.934	105.368	105.95	102.533	92.5279	105.766	105.1	103.246	106.664
96.9573	98.251	108.587	114.506	95.9742	109.873	104.812	99.2437	103.251	107.781	96.6427	91.0213	109.173	95.2028	101.876	103.487	93.5171	103.066	96.379	100.936	100.919	101.376	97.2825	101.775	98.6132	99.4603	98.9445	99.2568	112.845	98.1656	97.7586	105.899	98.7084	110.57	102.766	99.2237	105.728	105.337	93.5901	104.847	104.402	114.941	106.681	106.373	101.351	92.6246	106.313	106.607	103.54	107.586
95.4791	98.1764	108.107	113.734	95.9538	109.441	104.83	100.376	103.144	106.7	95.9385	91.0876	107.946	95.3122	102.32	103.887	93.7596	103.685	96.3293	100.783	101.178	102.077	96.7466	101.257	98.3314	100.588	100.197	99.3382	113.24	97.8299	97.4257	106.325	97.8417	109.807	103.391	98.413	106.379	105.26	94.3241	105.827	103.932	114.781	106.374	105.98	101.587	92.1235	105.773	105.88	103.228	108.005
96.7265	97.9847	109.119	113.948	95.7351	110.121	105.534	100.44	102.807	107.149	96.6307	89.8194	109.334	95.0765	102.481	103.609	94.568	103.214	95.4255	101.294	100.668	101.791	96.9444	100.771	98.6049	99.6051	99.9043	99.1411	112.98	98.4592	97.4303	105.953	96.8724	109.309	102.792	98.3315	105.608	104.612	94.3901	104.648	103.733	114.962	105.853	106.132	101.725	91.8875	106.635	106.577	103.482	109.128
96.4205	97.7513	108.148	113.003	95.3631	109.594	104.51	100.603	101.985	107.344	96.353	91.1461	109.226	94.8534	103.799	103.727	93.7576	103.441	95.0152	100.815	101.038	101.819	96.2231	101.801	97.9042	99.9362	99.5118	99.7124	113.456	97.9896	97.8602	106.582	97.9321	109.796	102.559	98.3164	107.22	105.575	93.536	105.009	103.934	115.326	107.049	105.887	101.3	91.714	105.914	105.776	102.795	108.949
96.8315	97.7826	109.06	113.344	95.0089	108.686	104.259	100.575	102.888	107.688	96.4534	90.8707	108.858	94.8959	104.049	104.231	93.961	103.821	94.9525	100.607	101.445	101.922	96.8945	101.781	98.1283	99.8025	99.9672	98.8491	113.533	98.0115	97.9227	106.291	98.4378	109.431	103.378	98.897	106.69	105.217	93.1282	104.387	103.815	114.951	106.42	105.639	101.074	92.2534	105.855	106.182	103.473	109.357
97.157	98.3212	108.604	113.075	94.9482	109.863	105.323	101.014	102.364	107.606	96.1353	89.885	107.369	94.4328	102.929	104.037	94.3382	103.6	94.3103	101.837	101.208	101.508	96.5553	101.493	98.3712	99.4369	99.4042	98.2212	113.53	98.5089	97.5708	107.07	98.4617	109.673	101.686	97.9509	106.458	104.384	93.7047	104.159	103.723	115.212	105.976	105.202	101.58	91.8951	105.157	105.614	103.106	109.343
96.84	98.2038	108.662	113.059	94.9604	109.89	105.777	101.156	103.191	107.667	95.9773	90.017	107.873	95.1945	103.286	103.901	93.9144	104.879	95.0291	101.584	101.446	102.234	97.0147	101.503	98.726	99.2072	99.5013	98.3209	113.542	98.5372	97.5386	105.485	98.6	109.523	103.082	98.1093	107.68	104.652	93.1004	104.281	103.981	114.401	105.981	105.316	101.226	91.515	105.877	105.416	103.036	108.815
95.6755	98.7344	108.784	114.112	94.6687	108.904	106.256	101.514	103.785	107.404	96.4374	89.8623	108.737	95.0387	102.28	103.897	94.3476	105.097	94.7331	101.353	101.713	101.823	97.1766	101.826	98.596	98.4189	99.8517	98.5363	113.329	98.3695	97.6989	104.44	98.0167	110.222	103.17	98.2979	106.899	104.509	93.2946	104.735	103.548	115.161	106.023	105.757	101.532	91.5853	106.168	105.621	103.009	109.481
96.8084	98.3131	108.437	112.825	94.3928	108.783	106.167	101.793	103.618	107.946	95.585	89.4974	107.977	93.884	102.097	103.792	94.1791	105.912	95.2826	101.011	101.279	100.628	96.7768	102.337	98.0302	99.711	99.5202	98.4571	112.643	98.1472	97.2843	105.411	97.8273	109.402	103.507	98.0676	108.025	103.727	93.8232	104.173	103.877	115.032	105.719	104.831	101.903	91.6261	105.684	105.606	103.332	109.114
95.8533	98.4352	108.662	112.948	95.2354	108.623	106.41	102.557	103.553	107.507	95.9429	89.4695	108.546	94.4233	102.726	104.133	94.1586	107.156	95.2352	101.384	102.099	101.183	97.0879	102.471	97.9417	99.0999	99.5559	98.4062	113.474	97.7433	97.7108	105.082	98.2698	109.962	103.7	97.9718	107.504	104.714	93.0022	103.544	103.977	115.139	107.678	106.431	100.935	92.5138	105.668	105.695	103.715	108.908
96.0105	97.6413	108.959	114.061	95.5179	108.158	106.747	102.191	103.841	108.432	96.5032	89.0867	108.196	94.6506	103.069	103.948	94.2271	105.627	94.9371	101.683	101.689	101.716	96.9041	101.983	97.9691	99.2944	99.0363	97.8202	112.835	98.725	98.3342	106.03	97.7563	109.585	104.173	97.9599	108.55	104.946	94.2278	104.164	103.848	115.075	106.505	105.761	102.272	92.3486	105.829	105.812	103.97	109.071
96.325	98.3326	109.613	112.937	95.6814	107.765	104.819	102.682	104.795	107.414	96.3751	88.9197	107.52	94.8783	103.455	103.556	93.9535	106.713	95.0094	101.682	101.023	100.88	96.8683	101.643	97.369	99.5263	99.2334	98.1201	113.201	97.9839	99.287	106.534	97.3101	109.125	104.307	98.1598	109.741	104.888	93.6877	104.614	103.463	115.697	107.673	106.902	102.505	92.3033	105.755	106.026	103.709	108.803
95.6911	98.4794	108.981	113.267	94.885	108.291	105.765	102.544	104.783	108.837	95.7292	89.4008	108.56	94.3405	102.209	103.799	93.6148	106.716	94.1276	102.35	100.396	101.576	96.3484	101.885	97.7837	99.3478	99.4028	98.6411	113.853	97.3644	99.1195	106.351	98.4099	109.578	103.465	97.4586	109.267	104.431	93.2127	104.211	104.023	115.061	107.11	107.281	102.04	91.1528	106.075	104.795	104.122	109.858
96.171	98.2659	108.769	112.549	95.1908	107.529	106.739	102.679	104.957	107.652	95.4638	88.4748	108.684	94.1339	102.077	103.995	93.7985	107.697	94.5376	102.518	100.766	101.458	96.9416	101.291	98.6106	100.018	99.6658	98.1886	113.528	97.5345	98.5646	106.706	97.0583	109.057	103.752	97.7184	110.345	104.791	93.0642	104.093	104.551	115.671	107.302	106.682	102.135	91.2303	105.691	105.491	103.839	109.561
96.1412	98.7984	108.594	111.899	94.417	108.502	106.68	102.759	106.232	108.59	95.3107	88.6389	108.061	94.8894	102.017	103.837	93.0548	106.311	95.0114	102.082	101.151	101.184	96.8966	102.087	97.6512	99.6867	99.1383	97.9012	113.103	97.8118	98.4081	107.181	97.5172	109.205	104.287	97.263	109.658	103.727	93.2475	104.076	104.41	115.279	107.087	107.306	102.773	91.1936	105.505	105.377	103.552	109.352
97.2203	98.8834	108.569	113.254	94.6893	107.718	106.673	102.73	105.359	108.02	95.4863	88.3707	107.35	94.2054	101.247	104.696	93.1079	108.008	95.9684	102.036	101.103	100.617	96.8365	102.011	97.8562	99.2532	99.2823	98.6964	113.194	99.3623	98.6876	106.855	98.235	109.249	104.538	98.3227	110.075	104.675	92.5742	103.27	103.592	116.088	107.067	109.238	102.549	92.21	105.455	105.453	103.957	109.659
96.3348	99.0183	108.255	111.033	94.2861	107.555	106.944	103.074	106.206	108.574	95.1723	88.6645	108.852	94.6653	101.955	104.667	93.1245	109.084	94.8468	102.369	100.989	101.021	96.5192	102.225	98.119	99.5051	99.1401	97.7862	114	98.1638	98.2655	106.786	97.7066	109.095	104.323	97.48	108.99	103.307	93.3727	104.719	103.612	115.637	107.29	108.612	102.492	91.3168	105.564	105.339	103.869	109.277
96.7597	98.5404	108.892	111.837	94.4706	106.674	106.703	103.394	106.762	108.29	95.4445	88.289	108.796	94.2168	100.581	104.652	93.8429	109.497	95.5744	102.036	101.362	100.187	96.9348	101.941	97.4658	99.995	99.2501	98.1831	113.015	97.8613	98.6934	107.094	96.9642	109.332	105.183	97.642	109.455	104.115	92.6583	104.308	103.802	116.619	108.212	109.569	102.951	90.8648	105.431	105.718	103.949	109.535
96.6226	97.6189	108.576	112.049	93.8762	106.111	106.34	104.021	107.097	108.138	94.4981	88.4345	109.617	94.9674	101.266	104.393	93.1601	108.749	94.4831	102.044	101.043	100.572	96.3469	102.147	97.7201	100.072	98.9931	97.052	112.805	98.8424	98.9278	107.72	97.0907	109.025	105.211	97.6515	109.89	104.905	92.0409	104.615	103.421	116.24	107.45	108.307	102.749	91.7891	105.884	105.07	103.563	109.298
96.7235	97.4656	109.207	111.788	94.4871	106.295	105.921	103.939	106.643	108.529	94.5839	87.8816	108.987	94.3085	102.496	104.194	92.6521	109.97	94.8426	102.295	101.199	100.076	96.3453	101.547	97.5401	100.709	99.8584	97.1964	112.693	98.1822	99.2415	107.678	97.7777	109.32	104.31	97.4908	108.535	104.78	92.7893	103.206	103.85	115.461	107.76	110.255	102.809	91.269	105.853	105.305	104.005	110.407
96.8327	97.4969	109.605	111.486	93.8347	106.619	106.315	103.608	107.605	108.523	95.1692	88.5828	108.73	94.3679	101.361	104.997	93.6256	110.252	95.4774	102.162	100.908	100.794	96.5834	101.4	98.079	100.492	99.318	97.715	113.639	99.6796	98.838	107.607	96.9155	109.167	105.371	97.2453	109.664	104.686	92.4025	104.456	103.985	116.11	107.126	110.94	103.812	91.565	105.643	105.863	104.081	110.011
97.0438	97.9924	109.203	112.37	93.9522	107.084	107.064	104.557	107.25	108.934	95.6183	87.5557	108.754	94.7068	100.195	104.603	93.6853	109.594	94.5992	103.024	101.708	99.7757	95.8471	101.658	98.3017	100.857	99.529	96.767	113.198	99.2309	98.9934	107.822	97.7649	109.915	105.492	98.5583	110.822	104.273	91.8678	104.076	103.701	116.014	107.953	110.076	103.255	91.3744	106.246	105.422	103.631	109.364
96.1428	97.6527	109.493	113.196	93.8901	106.685	106.425	103.419	107.761	108.631	94.2794	88.4958	109.215	93.747	101.148	104.925	93.7339	110.633	94.2288	102.166	100.412	100.329	96.6847	101.07	97.7565	101.541	99.3999	97.568	113.118	100.065	98.8242	107.695	97.6386	109.903	104.575	97.5157	110.408	104.382	92.3658	104.776	103.93	115.866	106.65	109.984	102.924	91.6068	105.955	105.56	104.187	109.732
96.5965	98.1201	109.397	111.291	94.1399	106.946	106.541	103.635	108.323	108.725	95.4584	88.2896	107.732	94.1249	100.612	104.921	93.8229	110.301	94.4395	102.698	100.909	99.205	97.2231	102.513	97.721	101.319	99.9903	97.5192	112.797	100.255	98.7049	107.41	97.4657	109.599	104.454	98.6816	109.355	103.954	92.8155	102.972	104.215	115.988	108.27	110.67	102.909	92.8189	105.908	105.638	104.545	110.178
97.0511	97.9905	109.341	111.027	94.5671	107.188	106.241	103.953	108.384	108.937	94.5628	88.3942	108.23	94.4628	101.491	104.828	94.0943	110.742	94.9169	103.148	100.442	99.7604	96.8639	101.689	97.7383	100.644	100.493	97.416	114.254	99.7534	99.2299	106.737	97.3694	109.412	104.488	99.1376	110.933	104.814	92.3015	103.677	104.476	115.704	108.12	110.429	102.304	91.645	106.499	105.622	104.207	110.456
97.9167	97.8361	109.047	111.798	94.5847	106.572	107.424	103.419	108.284	108.481	95.0941	87.6107	108.504	94.4471	100.921	105.182	94.3378	111.698	94.3807	102.549	100.353	99.1175	97.8505	101.732	97.6651	101.313	99.2832	97.1395	114.106	100.307	99.5964	106.821	97.2825	110.246	104.593	97.8282	111.512	105.267	92.7636	104.485	104.674	115.793	108.999	110.32	103.77	92.0732	106.014	106.12	103.657	109.613
98.3185	97.6603	110.144	110.951	94.9396	107.081	106.869	104.136	108.637	109.652	94.9716	88.0892	107.62	94.7688	101.561	105.923	94.5392	111.576	95.0494	103.563	100.577	99.606	98.713	101.466	97.6765	100.852	100.291	97.0338	113.772	101.028	100.111	106.307	97.6189	109.279	105.645	98.365	110.682	104.555	92.4264	104.373	104.648	116.849	108.577	110.989	103.059	91.6061	106.385	105.916	103.946	110.718
97.6884	98.3383	108.364	111.039	94.5241	106.616	106.735	103.767	109.275	109.526	95.0485	88.1371	107.647	93.893	100.955	105.82	94.9882	111.83	95.2793	103.089	101.232	99.4966	100.712	101.943	97.0416	101.276	100.215	97.3917	113.832	102.079	100.152	108.645	97.6889	108.769	105.272	98.9909	109.787	104.984	91.8586	103.307	104.237	116.559	108.646	110.557	103.606	92.4842	106.088	105.576	104.183	110.187
97.6097	97.3084	108.484	111.35	93.917	106.653	107.356	103.792	109.152	108.593	94.5961	90.246	107.952	93.6396	100.532	105.655	94.3001	113.111	94.9598	102.829	101.015	99.7186	101.618	102.685	97.8789	101.951	99.6115	97.3742	113.544	102.455	100.866	108.537	96.6996	109.28	104.622	98.1899	109.552	104.65	92.5448	103.281	105.131	116.826	108.005	111.442	103.217	92.8078	106.038	105.72	104.281	109.482
97.7976	98.7075	108.559	111.486	94.5316	106.298	107.744	104.313	109.862	109.755	94.4215	88.1725	106.55	93.5501	100.537	105.56	94.3909	112.413	94.9422	103.815	101.284	99.5828	100.82	101.897	98.2494	102.215	101.075	97.3813	114.29	101.01	100.511	108.808	97.0124	109.342	105.363	97.6479	110.544	104.914	92.4853	104.006	105.103	115.83	108.358	111.083	103.415	92.8644	107.327	105.535	104.021	110.172
97.8497	98.1626	108.87	111.544	93.9311	105.718	107.708	104.793	109.066	109.802	94.7738	89.0021	107.312	93.6533	99.5181	105.82	94.2253	112.46	95.3608	103.848	101.998	98.7952	102.212	102.397	96.9472	101.679	100.129	97.5373	114.271	102.413	100.54	107.918	97.0787	109.029	105.29	98.1662	110.42	104.353	91.7719	104.487	105.679	116.461	109.869	112.007	103.002	92.9504	106.856	106.576	104.551	110.084
98.7893	98.1733	107.86	110.781	94.1304	105.642	107.045	104.554	109.724	109.791	95.9158	88.3894	106.998	93.6546	100.85	105.717	95.3156	112.32	94.9937	104.237	101.482	99.7384	101.21	102.224	97.1325	102.382	99.5956	97.7114	113.803	102.106	100.937	107.487	97.0474	109.427	106.107	98.3133	110.966	104.498	92.5863	104.48	105.204	116.593	109.358	112.022	103.898	93.0576	107.539	106.518	104.836	110.528
98.8092	98.4391	108.206	111.626	93.8244	105.907	105.868	103.976	110.346	109.262	95.0539	88.6133	106.947	93.6769	100.028	106.335	94.6603	113.032	95.4001	104.367	102.065	99.0977	101.256	102.277	96.9424	102.445	100.374	97.853	114.377	104.011	101.118	107.475	97.2212	109.079	105.957	98.4675	110.692	104.404	92.466	105.468	104.851	116.885	108.184	114.455	103.901	92.8718	107.312	105.815	104.254	110.797
98.3347	98.1943	107.072	111.327	94.0546	105.715	107.006	105.431	110.693	109.263	95.6167	89.7203	106.626	93.3531	101.023	105.792	94.0873	113.302	94.6454	103.633	101.101	98.9637	101.309	102.496	96.5959	103.308	99.9451	97.9973	114.26	103.969	101.861	107.945	97.7811	109.124	105.498	98.766	110.151	105.713	93.0817	104.049	105.23	116.355	108.805	115.949	103.81	93.4633	107.136	106.079	105.128	110.69
98.4365	97.9862	108.251	111.396	94.0428	105.86	106.022	105.602	110.607	109.606	95.0237	88.5966	106.669	93.9187	101.719	106.413	94.7857	113.382	95.34	104.131	101.781	98.9984	100.777	102.502	96.8872	103.817	100.188	97.6289	114.666	104.359	102.502	108.73	97.3093	109.488	106.208	99.2646	110.097	106.834	93.2308	104.105	104.738	116.479	109.418	114.41	104.129	93.819	107.634	105.655	104.731	109.566
98.2425	98.1682	107.763	110.949	93.695	106.144	106.869	104.722	110.774	109.601	94.9379	88.4472	107.07	93.3419	101.597	106.717	94.5583	112.834	95.0101	105.487	102.272	99.1438	100.548	103.498	97.063	103.377	100.35	97.9759	115.241	104.566	101.96	107.913	97.6819	108.346	106.353	98.3409	110.579	104.683	93.0759	103.87	105.253	116.541	110.677	114.034	103.277	93.146	108.385	105.69	104.949	109.835
98.4859	98.1137	107.449	110.831	93.1165	105.453	105.595	104.54	111.177	109.843	94.4541	89.0991	107.206	93.3832	100.919	106.057	94.8178	113.302	95.6046	104.592	102.65	99.7504	100.558	103.286	96.72	103.986	99.738	97.9828	114.547	105.445	102.788	107.01	98.0036	108.888	105.61	98.9555	110.091	103.591	93.5778	103.995	105.532	116.41	109.853	112.932	103.42	93.1199	109.108	106.52	104.753	110.54
99.4241	98.7719	108.066	111.124	93.7694	105.391	106.404	104.584	111.154	110.838	94.8052	88.5552	107.456	92.9641	100.864	105.827	94.6432	113.207	95.328	103.862	103.032	98.796	101.248	104.189	97.1013	104.475	100.592	98.9633	114.672	106.028	102.596	107.392	98.1536	108.042	107.065	99.8629	109.797	104.363	93.2545	104.657	104.842	116.307	110.119	112.667	103.501	94.335	108.153	106.142	105.012	110.661
99.3154	98.0793	108.044	110.563	93.6793	105.114	106.098	104.519	111.163	110.646	94.8632	88.8531	106.426	93.7612	101.478	106.237	95.1992	112.957	95.5493	104.202	103.239	99.1859	100.559	104.012	96.8767	104.54	100.165	96.9207	114.461	105.317	103.224	107.639	98.0461	108.069	105.69	98.9558	110.651	105.232	93.4297	104.264	104.703	115.89	109.97	113.053	104.042	93.7508	108.313	106.128	104.908	110.886
100.394	99.0185	108.296	110.471	93.2597	105.143	105.251	105.125	111.14	110.888	94.5036	88.6228	107.325	93.6327	101.043	106.527	94.2672	113.815	95.2068	104.627	102.459	99.3616	100.489	104.48	96.9939	105.624	100.669	97.9951	114.456	106.872	103.541	107.184	97.6087	107.852	104.565	98.9528	110.348	105.341	92.5668	104.862	104.646	116.61	110.108	113.493	102.963	94.7104	108.083	105.689	104.779	110.028
99.952	99.8598	108.887	110.728	93.6104	105.983	106.68	104.885	111.6	111.047	95.0861	87.9308	106.393	93.7061	101.869	106.427	95.1829	113.168	95.5091	104.579	103.934	98.2194	100.781	104.38	97.4077	104.687	100.692	97.5486	114.638	106.235	102.934	107.406	97.4424	108.024	106.386	99.147	109.36	104.306	92.5166	104.176	104.295	115.979	110.213	112.984	103.164	93.9749	108.171	105.781	104.99	110.348
101.058	98.6922	108.095	110.395	93.8642	105.261	106.768	105.392	111.251	110.617	94.7761	88.5077	107.798	93.5711	101.148	106.231	94.2289	112.189	95.6299	104.671	103.482	97.4749	100.407	104.383	96.9105	105.803	100.506	97.6334	115.177	105.835	104.086	107.791	98.015	107.934	105.878	99.2175	108.991	105.033	92.3744	103.281	104.263	116.17	110.535	112.909	102.621	94.1643	108.374	106.034	104.98	109.999
100.312	99.2367	108.334	110.844	93.4506	104.369	106.489	105.284	111.755	110.195	95.3434	87.9611	106.422	93.6619	102.503	106.765	94.5118	111.833	95.923	104.536	103.521	97.9499	101.377	104.478	96.6307	106.148	100.097	97.1577	114.413	107.604	103.77	106.675	98.2647	107.658	106.513	99.9301	108.002	104.108	92.8783	103.825	105.098	116.317	111.353	112.672	103.542	94.0203	108.428	106.029	105.296	110.523
101.02	99.1399	107.889	111.197	94.0153	104.38	107.253	104.858	112.332	110.65	94.995	88.5161	107.747	93.4458	101.703	106.525	94.2006	113.467	95.4855	104.462	104.182	98.6634	101.285	103.892	96.2833	107.536	100.19	97.2674	115.272	107.949	104.092	108.2	98.397	107.238	106.099	100.741	109.509	104.253	92.922	104.14	104.727	115.844	110.922	111.98	102.913	94.9166	108.491	105.39	105.084	110.999
100.964	99.8897	107.348	111.159	93.1474	103.038	106.066	104.124	112.496	111.265	94.3247	89.0673	107.229	93.4678	102.371	106.299	94.4833	113.119	95.5175	105.25	104.633	98.2551	101.321	104.449	96.0955	108.117	99.8221	98.1342	115.503	108.264	104.101	108.54	97.8146	107.867	106.215	100.833	110.393	104.213	92.6606	104	104.453	116.262	110.326	113.627	102.735	94.9698	108.124	105.514	104.396	110.935
100.966	98.6507	107.247	110.595	93.2453	103.249	104.824	105.575	112.042	110.183	94.4663	88.0124	108.007	93.7876	101.985	106.669	94.4217	113.521	95.7316	104.761	104.457	98.0768	101.652	103.829	95.9411	108.429	99.9259	98.7695	115.61	108.079	103.764	107.963	98.0694	107.664	105.419	101.126	110.508	103.683	94.0688	104.026	104.685	115.697	110.388	113.204	102.949	94.6987	108.817	104.963	104.737	111.471
102.032	99.384	107.906	110.768	93.3437	103.766	107.06	105.446	111.931	110.68	95.0749	88.6827	107.706	93.9616	100.398	106.093	94.4958	113.012	95.5658	105.283	105.209	98.0984	101.889	104.003	95.706	109.223	99.5191	99.3073	115.205	108.918	105.079	108.777	97.1926	107.401	107.099	100.465	110.987	103.574	93.5477	103.401	104.648	116.65	109.938	112.46	102.848	94.6472	108.65	104.53	105.115	110.214
102.319	98.7241	107.738	110.541	93.8326	103.436	106.322	105.391	112.706	110.38	94.7232	88.7778	107.54	93.3163	100.989	106.363	94.3948	112.936	96.718	105.214	105.419	98.1517	102.297	104.392	96.1715	109.092	99.2975	98.9283	116.371	109.359	104.458	109.103	97.2633	107.246	107.271	102.012	110.481	103.66	94.0254	104.64	104.54	116.373	111.309	112.293	103.273	94.888	108.471	104.773	105.749	111.009
101.505	99.5224	107.937	110.682	93.6995	102.626	105.762	105.149	111.907	110.265	94.4512	90.1896	106.811	93.0161	101.689	105.9	94.5875	112.952	95.8386	104.916	106.637	97.6964	102.233	105.494	96.6495	108.437	99.611	99.8561	116.606	109.615	104.622	108.536	97.546	107.324	107.308	101.892	111.496	103.287	94.923	103.815	104.564	115.983	111.645	112.401	103.054	96.0644	108.888	104.588	104.852	110.297
102.123	99.1932	107.923	110.431	94.2735	102.824	105.715	105.558	112.015	110.424	94.5753	89.433	107.686	93.2909	101.489	105.553	94.4905	113.45	95.8744	104.762	105.738	97.7967	102.383	105.301	96.2818	109.378	99.617	99.4429	116.138	109.193	104.616	108.445	97.9053	107.031	105.927	101.399	111.321	103.722	94.5751	103.468	104.848	116.519	110.277	112.229	102.929	95.3976	109.552	104.019	105.285	110.669
102.843	100.299	107.986	110.926	93.9113	102.033	106.04	105.48	112.235	110.897	94.8829	89.9178	107.506	93.5265	101.897	105.637	94.997	113.137	96.549	105.369	106.816	98.7015	103.524	104.509	96.2495	109.883	99.4123	99.0797	116.46	110.168	105.217	107.799	97.9942	106.882	107.293	101.797	110.064	105.26	94.9789	103.903	105.202	116.055	110.325	112.488	102.741	95.2675	109.778	104.179	105.782	110.594
101.805	99.6569	108.329	111.12	94.3436	102.741	105.338	105.249	112.287	111.243	94.7874	89.9111	107.625	93.4214	100.714	105.567	94.6455	112.788	96.4423	105.453	106.729	98.7977	102.93	105.759	96.3318	109.946	99.89	98.9848	116.38	110.034	105.66	108.864	97.5164	107.448	106.975	102.149	109.291	103.526	94.5789	103.66	105.568	115.645	110.176	111.292	102.744	94.9708	109.551	103.703	105.687	110.35
101.794	100.244	107.382	110.399	94.1065	102.688	104.104	105.955	112.11	111.341	94.6097	90.6925	107.416	93.6469	100.111	105.336	94.559	112.687	96.3709	105.658	107.389	97.1729	103.745	105.142	96.4345	110.605	99.302	99.0482	116.052	111.538	105.909	108.677	97.9974	106.724	106.29	103.689	110.743	102.657	94.1275	104.372	105.482	115.231	109.797	111.456	102.458	95.5334	109.662	104.114	105.387	110.418
102.687	100.535	107.247	111.418	94.2921	103.261	104.154	106.205	112.13	110.888	94.9151	90.1858	106.91	93.458	100.37	104.9	95.664	113.77	96.0291	105.333	107.702	97.4081	103.165	105.417	96.6019	111.379	99.5349	99.2388	116.208	111.393	106.142	109.087	98.5205	107.392	106.481	104.382	112.134	102.651	93.7642	103.224	105.525	115.542	110.203	113.332	103.79	95.6553	110.094	103.547	106.032	110.897
102.986	100.543	107.337	110.603	94.6826	104.013	105.736	105.915	112.622	110.731	95.0808	90.1456	106.876	93.9107	100.787	105.175	96.0988	113.048	96.0625	104.709	107.659	96.978	103.996	106.061	96.4568	110.716	99.6358	100.125	116.279	112.302	106.5	109.24	97.4243	107.588	106.329	104.868	110.844	102.384	94.3817	103.501	104.947	115.463	111.202	113.454	102.716	96.0796	110.179	103.892	105.915	110.862
104.036	100.072	108.73	111.759	94.6154	103.338	104.763	106.245	112.454	111.388	95.1182	90.6557	106.983	93.8173	102.298	105.527	97.5348	113.939	96.8328	104.349	107.972	97.1376	102.937	105.966	96.8278	111.176	100.257	99.8673	115.953	111.586	105.226	109.568	97.4947	107.303	106.824	105.3	112.726	103.354	95.4229	103.514	105.824	116.085	109.976	112.93	104.174	96.3269	110.223	103.127	106.803	110.934
103.611	100.399	107.38	111.413	94.6039	103.757	105.377	105.187	112.574	111.052	94.5364	90.5806	106.84	94.31	101.919	105.028	97.6514	114.395	96.9386	105.717	108.063	96.2777	103.295	105.587	96.8528	110.469	100.134	99.9629	117.1	111.711	106.473	108.771	97.9853	107.287	108.217	106.349	110.989	102.786	96.3566	103.338	105.322	115.074	110.344	114.053	103.387	96.966	109.872	103.333	106.104	110.733
103.376	100.393	107.376	111.474	94.6636	103.716	104.804	105.446	112.417	111.007	94.8536	90.8469	106.541	94.4377	101.545	104.953	98.8795	113.846	97.6335	104.816	107.636	97.2498	104.113	106.415	96.9998	111.413	99.6445	100.544	117.055	111.871	105.657	107.572	97.9861	107.267	107.884	106.627	112.249	103.305	95.6149	103.289	105.332	115.69	110.04	114.272	102.844	96.3666	110.397	103.053	106.279	110.316
104.208	100.586	107.382	111.404	94.6791	104.714	105.729	105.852	113.16	110.721	95.8114	91.2555	107.69	93.9861	100.549	104.89	99.3554	112.443	97.9124	104.992	107.728	96.9548	103.997	107.157	97.2148	111.861	101.334	100.314	117.298	112.069	105.615	107.92	98.5989	107.292	108.794	107.727	111.291	103.102	96.369	102.137	105.21	115.382	109.471	113.614	103.073	96.5741	110.851	103.563	106.245	111.043
104.089	100.944	107.142	111.705	95.3052	104.191	105.777	106.362	113.084	110.773	95.4237	90.9549	106.311	94.3042	102.294	104.432	99.7592	113.524	97.6177	105.392	109.049	97.0502	104.47	107.578	96.3436	113.07	100.208	101.505	116.617	112.289	106.027	106.739	99.4181	107.065	107.99	107.84	110.797	103.501	96.4135	102.396	105.386	115.717	109.11	113.035	102.415	96.6306	110.727	103.212	106.065	110.459
104.797	101.621	106.953	111.317	94.4488	103.652	106.514	106.842	113.339	110.992	94.9757	91.5439	106.376	93.9623	101.889	104.091	100.948	113.242	98.8643	104.715	108.301	96.5118	105.282	107.838	96.2154	112.18	100.073	101.166	117.785	113.85	106.074	107.878	99.128	107.05	108.137	108.385	109.39	103.368	96.1459	101.965	105.617	115.272	108.841	114.116	103.039	97.5691	110.984	102.458	106.099	110.786
104.754	100.989	107.465	111.416	94.924	103.598	105.834	106.955	112.991	111.405	95.1114	92.0369	105.642	93.9743	101.406	103.55	101.156	113.367	97.8416	105.308	109.203	95.5705	104.78	107.487	96.692	112.835	99.5285	101.501	117.515	112.666	106.813	108.696	98.0733	107.3	109.129	108.781	109.555	103.678	97.2704	102.707	105.264	114.74	109.065	112.437	102.983	96.758	110.808	102.986	106.23	111.162
104.01	101.049	107.666	111.902	94.772	104.993	105.423	107.075	112.759	110.672	94.8177	91.4536	106.067	94.208	101.756	104.216	102.022	114.119	99.5234	105.511	109.439	95.6595	105.383	107.704	96.5035	112.557	99.3247	101.486	117.036	112.838	106.154	108.921	98.5421	106.562	108.743	108.249	110.504	103.184	96.9022	102.976	106.217	115.219	110.728	114.28	102.749	97.2698	110.79	103.432	106.95	110.514
104.97	101.392	107.355	112.03	95.3179	104.573	104.726	107.36	112.471	110.866	94.8703	92.4102	105.741	94.5312	100.6	104.332	102.9	113.569	99.6406	105.033	109.831	96.0819	105.411	108.751	96.9745	113.509	100.583	103.045	118.089	112.149	105.886	110.075	97.6651	106.055	107.809	108.795	110.714	104.334	96.8045	102.417	105.416	115.077	109.635	113.39	103.441	97.3861	111.272	102.814	107.064	110.848
104.676	101.444	107.528	111.705	94.6425	103.527	105.174	107.434	112.418	110.454	94.6877	92.6732	105.594	94.9768	101.002	103.892	103.028	113.583	98.9631	105.059	110.179	95.8173	106.292	108.511	97.2472	113.224	100.245	102.539	118.047	113.626	105.643	110.307	98.794	106.251	109.377	107.567	110.525	103.593	97.1882	102.711	105.767	115.08	109.651	114.117	103.237	98.0917	111.339	103.059	106.687	110.147
103.457	101.9	107.5	111.592	95.8504	102.729	105.404	107.326	112.491	111.246	95.6776	91.689	105.558	94.7748	99.9196	103.875	104.345	114.345	99.9745	105.009	110.935	97.3472	105.947	108.566	96.8479	112.725	100.85	102.942	118.545	114.01	104.772	111.218	97.9442	106.553	108.215	108.366	111.085	104.449	97.5296	101.213	105.844	116.214	109.897	114.422	104.194	97.8567	111.326	103.229	107.045	111.232
104.352	101.682	106.959	111.3	94.9747	103.144	106.386	107.478	111.79	111.314	94.7674	92.1757	105.693	96.0854	100.758	103.299	104.391	114.249	98.9953	105.607	110.066	96.488	105.719	108.187	96.3291	112.739	100.323	103.494	118.262	112.78	105.334	109.58	98.4698	106.222	107.573	108.401	112.159	103.823	97.4877	103.152	106.359	116.067	109.022	114.843	103.839	98.2289	111.478	103.168	107.166	110.364
104.624	102.104	107.751	110.679	94.9535	103.097	106.405	107.253	112.099	111.184	94.7419	91.6531	105.893	95.4985	100.157	104.042	105.889	114.372	100.269	105.253	110.286	96.3862	105.542	109.074	96.9697	113.349	100.016	104.613	118.501	112.322	105.367	109.03	98.2627	106.376	107.902	107.469	111.569	104.404	98.6488	103.087	105.91	115.513	108.696	113.597	104.277	97.6514	111.837	102.6	107.668	111.352
105.878	102.385	108.193	111.126	94.9268	103.412	106.527	107.946	111.857	111.015	95.5444	92.3228	104.935	95.8295	101.064	103.942	105.684	114.034	100.551	105.192	110.949	95.9821	105.208	108.683	96.8403	113.516	99.9648	103.941	119.471	113.081	106.545	107.699	98.4679	106.956	105.894	107.675	111.178	104.195	98.1693	102.979	106.311	115.813	107.317	113.779	103.572	98.6069	111.897	103.291	107.103	111.483
105.785	101.666	107.714	110.212	95.0656	103.741	107.852	108.088	112.305	111.246	94.1744	92.3604	104.57	96.3051	100.721	103.659	106.68	114.194	100.426	105.589	110.676	96.6485	105.064	108.894	96.5138	113.531	100.123	104.118	120.388	112.154	105.317	108.544	98.815	106.154	106.735	106.897	112.028	104.012	97.9711	102.755	106.14	116.329	109.075	113.148	103.54	98.1919	111.959	102.701	107.516	110.289
105.107	101.454	107.504	110.849	94.8726	104.134	106.491	108.691	111.976	111.203	95.6048	92.5419	105.324	96.1641	100.133	103.892	107.049	113.441	100.53	105.697	111.325	96.7141	105.467	109.669	95.797	114.313	99.6823	103.671	119.991	111.097	105.987	107.535	99.4916	106.147	107.745	107.191	112.439	104.301	98.2181	102.812	106.034	116.061	109.552	113.132	103.337	98.5048	112.075	102.59	107.079	111.266
105.154	101.748	107.507	110.761	95.7381	102.964	104.867	108.674	112.089	111.126	95.3121	92.7593	104.774	95.8747	100.462	104.286	106.925	113.65	101.393	105.932	110.729	96.7501	104.612	109.647	96.5178	113.908	99.3507	103.428	121.305	112.025	105.699	105.945	98.9582	105.966	107.232	106.642	111.986	104.153	98.6674	102.676	106.441	115.728	108.621	113.299	103.829	98.1535	111.828	102.798	107.766	110.895
105.598	102.683	107.911	111.683	95.0731	103.077	106.11	109.925	112.36	110.803	95.0684	93.9624	103.637	96.66	99.2762	104.697	107.737	114.059	101.019	105.775	110.592	95.9229	105.309	109.966	96.8198	114.58	99.2546	103.964	120.824	111.385	105.814	106.685	100.227	106.165	107.478	105.768	110.778	105.533	99.1544	102.802	106.903	116.06	108.509	113.791	103.609	98.7341	111.923	102.602	107.072	110.855
104.929	102.739	107.766	110.496	95.0725	103.125	105.499	109.937	111.971	111.322	95.0072	94.408	105.559	96.5907	99.9683	104.37	108.313	113.575	101.292	106.25	111.345	95.2639	104.423	110.487	97.0234	113.732	98.7612	104.625	121.775	111.782	105.855	104.359	100.646	106.203	108.792	106.041	109.392	103.819	99.257	102.883	105.852	116.873	107.307	111.85	103.573	99.4564	112.622	102.717	107.22	111.042
105.552	103.013	107.561	110.356	95.6181	103.153	104.186	110.151	112.339	111.69	94.9056	93.62	105.409	97.271	100.841	104.434	109.273	113.494	101.646	106.089	111.427	96.0547	106.254	110.602	97.3909	114.079	99.4563	104.122	121.934	113.895	105.899	103.758	100.766	106.299	106.623	106.419	109.819	104.031	98.5386	101.571	106.166	116.822	107.723	113.349	103.583	98.8495	112.068	102.958	107.715	110.946
106.352	103.939	107.352	110.424	96.0192	102.571	104.682	110.775	112.131	111.309	95.4737	93.8194	105.108	96.6938	99.3606	104.228	109.761	112.541	102.138	105.87	111.96	95.1094	104.885	110.755	97.7457	113.866	98.4891	105.274	122.432	113.548	106.372	101.414	100.627	105.787	107.467	105.899	111.032	104.777	99.5285	102.94	106.298	116.769	108.649	113.335	104.021	98.8391	113.104	101.443	106.998	110.64
105.872	103.87	107.66	110.27	95.3517	102.97	104.387	110.861	112.327	110.851	94.883	94.3055	104.375	97.5924	99.4309	104.53	109.874	111.781	101.824	105.616	111.452	96.5789	105.081	110.483	97.2403	114.8	98.6081	105.861	122.719	114.074	106.113	100.92	100.719	106.337	106.391	106.453	110.483	103.598	100.279	102.25	107.079	117.346	106.891	113.563	103.671	98.8382	112.984	101.477	106.78	110.605
105.699	104.373	107.464	110.451	95.4811	103.779	104.553	110.978	111.964	111.216	95.9972	94.4752	105.369	97.9257	98.4794	104.146	109.87	112.116	101.6	106.245	111.987	96.7336	105.396	111.183	98.6848	114.451	99.1231	105.551	123.509	112.78	106.371	100.986	100.298	105.238	105.996	105.986	111.386	104.675	99.9257	102.408	107.41	116.517	107.457	113.175	103.478	99.2249	112.824	101.56	106.668	109.925
105.99	104.579	107.495	110.69	95.9208	103.513	106.349	111.63	111.914	111.412	97.1081	95.551	105.493	97.6906	99.9087	103.762	110.689	113.195	101.995	106.215	112.828	96.476	105.097	111.118	98.498	114.356	99.1296	106.017	123.529	112.748	105.374	100.432	100.444	106.579	107.232	104.856	111.96	105.031	100.591	102.5	106.397	116.975	107.515	114.43	103.439	99.3534	113.515	101.076	106.609	110.702
106.892	104.164	107.716	110.935	95.7147	102.86	105.58	111.043	112.168	111.533	96.335	95.7551	104.649	98.3956	98.0566	103.588	110.48	113.191	102.143	106.19	112.092	96.2849	104.845	111.053	98.7588	114.839	98.6429	106.374	123.333	113.201	106.856	98.6288	100.914	105.889	107.131	105.124	112.354	104.535	100.482	102.964	107.142	116.426	107.851	113.308	103.173	99.2233	114.18	101.587	106.818	110.922
107.291	105.36	107.693	110.735	96.5708	102.779	105.539	110.386	111.852	111.087	95.5944	97.0817	104.616	98.2593	99.4869	103.736	110.291	113.128	102.894	105.869	112.814	95.4949	105.117	111.375	98.662	114.497	98.7178	106.843	123.116	113.4	106.784	97.1315	100.785	105.934	105.619	105.935	111.715	104.264	101.459	102.763	106.449	116.311	107.506	112.592	102.869	98.8509	114.287	100.631	107.671	111.069
[truncated: 6 more columns]

## Sheet: 1.11
6.83901	11.7193	9.45487	10.0782	9.69556	8.3923	13.8926	13.9991	13.3315	14.0687	11.9169	12.6474	10.2419	12.3902	13.3542	10.0635	13.9707	9.5545	10.6997	10.2855	13.9841	14.6865	8.97576	9.21699	11.9603	11.2154	10.1374	7.67391	17.696	12.3812
1	2	3	5	1	6	8	4	5	6	7	1	2	3	4	5	6	7	8	4	5	8	9	10	13	1	4	7	1	2
1785.4	1345.62	1113.53	1524.88	2257.39	1938.96	1947.81	1879.66	1183.37	1476.37	2155.02	1656.05	1201.5	1389.88	1458.24	1658.34	1247.85	2052.74	1991.42	2422.89	1158.95	1350.65	1279.04	1793.58	1571.22	1955.63	1572.83	1528.46	1028.21	1234.01		1605.32
1	1	1	1	2	2	2	3	3	3	3	4	4	4	4	4	4	4	4	5	5	5	5	5	5	6.1	6.1	6.1	6.2	6.2
100	100	100	100	100	100	100	100	100	100	100	100	100	100	100	100	100	100	100	100	100	100	100	100	100	100	100	100	100	100		100	6.86449e-15	30	0
99.253	100.994	99.6824	100.434	99.6507	100.803	100.405	99.7024	98.9572	99.6625	98.8224	100.42	98.0778	99.7927	100.972	99.6047	99.7477	99.701	100.301	99.995	99.9961	99.2814	100.714	99.0053	100.446	100.273	99.9902	101.091	99.562	99.7796		99.9039	0.686617		0.5
100.114	99.4746	100.412	99.997	99.5318	99.903	99.6372	99.5111	98.7687	99.6565	99.7423	100.099	99.7389	100.522	100.25	99.3722	100.255	98.9599	99.4157	99.7037	99.5803	99.9897	100.371	99.3795	99.3754	99.326	99.6877	100.811	99.6781	99.3273		99.753	0.453341		1
99.566	99.3286	99.1365	100.458	98.7143	100.311	100.201	99.9189	99.0104	100.292	98.7237	100.847	100.003	100.799	99.8251	98.929	100.894	99.0523	99.3398	99.0517	98.5098	99.7112	99.7993	99.5633	99.7208	99.2642	98.6619	100.171	101.07	98.2622		99.6378	0.749552		1.5
99.2399	99.3617	99.8477	100.488	98.6707	101.225	99.7863	100.161	98.1078	98.1596	98.368	102.005	98.6978	101.131	99.1097	98.0265	99.6696	98.6244	100.504	100.206	98.8364	99.802	100.849	99.2176	99.4969	98.8164	98.3364	100.878	100.578	98.0467		99.5416	1.06398		2
100.073	99.6359	99.5399	101.021	98.799	101.071	99.668	100.838	98.5421	98.2224	99.4147	101.679	98.4845	101.398	98.3315	98.6598	100.04	98.1186	99.4079	99.6691	98.6812	99.6054	101.518	99.4465	99.4172	98.2938	99.6087	100.78	100.79	99.6777		99.6811	1.03715		2.5
100.292	99.4473	99.1955	101.739	98.5825	100.99	99.7747	99.8722	97.9302	99.1095	99.1846	101.597	97.7335	101.886	98.3935	98.6241	100.467	97.6395	100.255	99.682	98.6774	100.592	102.166	98.5393	98.4161	98.7335	98.6149	100.892	102.971	98.1133		99.6703	1.40726		3
100.554	99.4226	98.6877	100.901	98.9527	101.061	99.6891	100.039	98.8682	98.6826	99.8981	102.121	99.158	100.743	98.2645	97.3282	99.805	97.8326	100.629	99.642	97.7548	101.088	101.872	98.9764	98.5452	98.2807	99.131	100.822	103.125	98.3351		99.6736	1.37006		3.5
99.8762	98.2913	97.7452	101.568	97.9135	101.44	99.5436	99.5228	98.6939	99.3894	99.7955	102.224	98.4652	101.147	97.9511	97.7391	101.497	97.617	99.8935	99.8832	99.1029	100.318	100.685	99.4064	97.6501	97.655	99.4177	101.713	103.606	98.7856		99.6179	1.54329		4
100.125	99.0581	98.7542	102.149	98.3308	101.509	99.7534	99.8443	98.5637	99.5191	98.8739	102.657	98.6629	101.434	98.1735	98.4252	99.7887	98.5416	99.1844	99.8915	98.807	100.141	102.259	99.0238	98.3167	98.272	98.6942	101.652	104.395	98.7562		99.7852	1.55551		4.5
106.964	110.777	108.209	112.228	108.026	109.901	113.646	113.843	111.895	113.588	110.791	115.304	108.905	113.824	111.528	108.489	113.759	108.096	109.884	110.177	112.791	114.828	111.235	108.241	110.277	109.487	108.832	109.326	122.091	111.137		111.269	3.00259		5
105.727	111.296	109.098	113.385	105.516	108.881	112.555	115.369	111.168	111.996	111.366	114.57	108.211	112.802	110.967	107.595	114.033	106.613	108.644	110.152	111.791	113.981	110.648	107.76	110.944	109.541	107.119	107.592	121.235	110.2		110.692	3.24542		5.5
102.852	109.883	108.653	112.249	103.969	107.607	111.055	114.154	111.287	109.531	112.219	112.223	106.433	112.533	110.513	106.574	113.2	104.754	108.217	110.204	113.502	115.295	109.52	107.605	110.98	108.713	104.46	105.775	118.327	109.151		109.715	3.49936		6
100.936	108.078	109.836	112.175	102.386	106.571	110.068	114.29	109.377	107.765	112.65	110.716	104.002	110.975	109.13	105.058	112.173	103.268	106.368	109.354	112.264	113.987	108.205	106.86	111.913	108.979	103.145	104.384	116.413	107.398		108.624	3.76773		6.5
99.4027	107.092	107.685	112.757	100.813	106.46	109.225	114.242	109.913	107.737	112.281	110.461	103.077	109.547	108.677	105.594	112.593	102.139	105.427	109.785	113.671	115.05	106.026	106.82	109.878	108.458	102.331	102.862	116.837	107.117		108.132	4.26605		7
98.9298	107.03	108.482	113.167	99.9776	106.68	108.277	114.302	110.905	106.816	112.677	109.117	102.365	109.421	107.337	104.186	112.913	100.354	104.464	109.41	113.206	114.348	105.715	106.037	111.284	107.427	101.584	102.725	114.077	106.024		107.641	4.42869		7.5
97.734	105.894	108.219	112.337	99.164	105.452	107.345	114.903	110.135	105.509	112.641	108.318	101.292	108.483	106.539	103.312	110.437	99.8973	103.395	109.485	112.774	115.391	105.894	106.299	110.722	107.39	101.097	100.657	115.457	106.426		107.087	4.77926		8
98.0117	105.26	108.662	111.684	98.5125	105.408	106.9	115.416	109.387	105.05	113.352	107.674	100.06	107.852	106.122	102.82	111.552	99.1763	103.255	108.912	113.581	114.711	104.812	105.998	111.376	106.816	100.332	100.782	116.108	106.22		106.86	5.04923		8.5
97.743	104.713	109.082	112.122	98.0693	105.136	106.618	114.675	108.635	105.188	112.624	106.572	100.384	107.24	106.052	102.798	111.864	99.3106	103.103	108.848	112.741	114.7	104.879	106.446	110.381	106.073	99.8884	100.641	115.092	106.767		106.613	4.92184		9
97.1846	104.244	108.112	112.121	98.4262	104.535	105.947	115.25	108.245	104.87	112.875	106.602	98.9988	108.176	105.168	102.123	111.226	98.9762	102.552	108.769	112.242	116.168	105.307	106.194	110.743	106.017	99.736	100.336	114.258	105.857		106.375	5.12534		9.5
97.3922	103.938	107.672	111.882	98.1248	105.127	105.924	114.629	108.846	103.902	112.945	106.516	99.5093	107.149	104.475	101.703	112.011	98.3397	101.306	108.767	113.467	116.012	104.141	105.558	110.482	106.408	99.4387	100.297	114.268	105.274		106.183	5.24746		10
96.5099	103.742	109.128	111.542	97.2394	104.497	105.678	114.425	108.11	103.505	113.37	105.676	98.9911	107.352	105.068	101.013	111.378	98.9053	100.836	108.684	113.632	115.951	104.825	105.509	111.975	105.321	99.9256	99.6318	115.492	107.676		106.186	5.49259		10.5
97.7427	103.594	108.64	112.015	97.4837	104.148	106.358	114.781	108.163	103.11	114.029	104.605	99.1006	107.331	103.53	101.374	110.624	98.3072	101.374	109.051	114.776	115.604	104.076	106.138	112.108	105.873	99.8691	98.949	115.293	106.204		106.142	5.54166		11
97.4031	102.764	108.294	111.823	97.2618	104.505	105.944	113.572	107.316	104.103	114.078	104.152	97.9179	106.463	104.654	101.109	110.932	98.5949	101.369	108.692	112.199	117.045	104.628	105.601	112.166	105.815	99.7629	98.3798	115.449	106.364		105.945	5.53601		11.5
96.8943	103.391	108.357	111.152	96.8847	103.959	105.806	113.748	107.615	102.548	113.7	103.464	98.2436	106.302	102.726	100.186	110.682	98.1772	102.007	109.522	114.526	117.533	104.239	104.601	111.7	106.222	99.3359	98.7008	114.617	105.036		105.729	5.71434		12
96.8501	102.473	109.048	112.535	96.9572	104.154	105.502	113.79	107.027	102.956	113.916	102.835	97.6679	105.71	102.738	99.9217	109.734	98.2061	100.515	109.771	113.063	117.454	103.985	104.65	112.31	105.752	100.042	99.1035	115.415	105.052		105.638	5.79907		12.5
97.1808	102.963	108.329	111.566	96.8954	104.109	105.884	113.279	107.995	103.008	113.483	102.792	97.7182	105.779	102.977	99.2155	111.039	98.1897	100.259	109.217	112.968	117.049	104.48	104.834	112.158	105.992	99.4554	99.2256	114.757	105.798		105.62	5.68316		13
96.6276	102.403	108.26	112.236	96.4556	103.371	105.102	112.531	108.035	102.623	113.985	103.48	97.0987	105.191	102.874	99.2485	109.836	98.0299	100.51	109.919	113.66	116.569	104.627	105.088	111.956	105.929	99.3506	99.7899	115.69	104.698		105.506	5.80372		13.5
96.6006	103.008	108.59	111.043	95.771	104.343	105.206	112.055	107.846	101.292	113.994	102.583	97.6784	106.179	102.784	98.8698	110.041	98.4568	99.3516	109.735	115.176	116.691	104.634	105.466	112.393	105.799	98.2853	99.5752	114.49	104.43		105.412	5.89817		14
96.2216	102.759	108.97	111.604	96.0164	103.81	104.926	111.921	107.788	102.19	113.954	103.203	96.8071	105.488	102.02	99.2424	109.478	98.3855	100.641	109.582	114.851	116.095	104.746	105.563	112.744	106.414	99.8781	98.7933	114.86	105.053		105.467	5.83575		14.5
95.9508	102.446	109.944	110.987	96.3911	103.344	104.941	111.769	107.657	101.769	114.211	103.44	97.5775	105.255	101.616	99.5535	109.156	98.2454	99.5813	109.27	115.012	117.739	104.576	105.161	113.362	105.477	99.3289	98.853	114.218	104.161		105.366	5.96483		15
96.5657	102.129	108.538	112.348	96.5727	103.562	103.673	111.973	107.594	101.264	113.911	103.398	96.717	105.983	101.67	98.4633	108.097	97.6275	98.5023	110.12	115.793	117.085	104.172	105.027	112.041	104.55	98.8849	98.4134	114.216	105.603		105.15	6.07233		15.5
96.9885	102.621	107.316	111.703	96.6793	103.295	104.334	111.406	108.601	102.382	114.441	103.389	96.932	105.105	102.168	99.5916	109.175	97.5316	99.2429	110.071	115.002	116.56	104.289	104.82	112.75	104.652	98.5761	97.5758	114.024	104.654		105.196	5.91872		16
96.7759	101.662	108.567	111.952	96.4868	103.086	103.358	110.708	107.34	101.256	113.943	102.619	96.0521	104.6	102.328	99.7979	109.18	97.7469	99.1628	109.688	115.947	115.05	104.289	104.851	112.083	103.619	98.5777	98.2642	114.245	104.218		104.915	5.89591		16.5
96.6063	102.594	107.877	112.033	96.6359	103.038	103.436	111.381	107.659	101.434	114.655	102.697	96.6723	105.247	102.08	99.0003	108.28	97.0204	99.0278	110.679	116.202	117.125	104.404	104.677	113.112	103.602	99.3838	99.3111	113.477	104.363		105.124	6.06082		17
96.5647	102.176	108.937	112.032	96.2499	102.843	103.197	111.021	107.323	100.592	114.179	101.719	96.6833	105.571	101.85	99.8376	109.037	97.453	98.7443	110.394	114.831	116.083	103.579	103.692	113.036	102.84	99.4222	98.0229	114.658	104.603		104.906	6.04872		17.5
95.5034	102.094	109.377	111.062	96.0569	103.246	103.812	111.435	108.162	100.035	115.033	101.736	96.4059	105.465	102.274	99.1767	107.594	97.3714	99.232	110.857	116.676	116.353	103.066	104.936	112.349	103.319	99.3754	98.6017	115.559	104.482		105.022	6.2833		18
96.3985	103.016	108.81	111.442	96.8351	102.663	103.301	111.141	107.585	100.934	115.113	102.672	97.2299	104.804	101.782	99.1077	108.871	97.073	98.6594	111.103	116.703	116.081	102.696	104.355	112.313	103.698	98.456	97.9631	112.984	103.115		104.897	6.10542		18.5
96.2972	102.721	108.331	111.796	95.7767	102.981	103.336	111.463	108.066	100.937	114.908	102.771	96.8567	104.139	102.277	99.6289	107.849	96.8493	98.8277	110.911	115.645	116.698	102.098	104.322	112.501	103.799	99.2864	98.386	114.365	103.753		104.919	6.1483		19
96.4281	102.511	109.337	111.916	96.4449	102.449	102.963	110.94	108.066	99.8542	114.323	101.703	96.8146	105.11	102.372	100.294	107.641	97.0694	98.7694	111.109	116.48	116.021	102.661	104.165	112.402	103.629	98.6596	97.4899	115.072	103.793		104.883	6.20849		19.5
95.8904	103.316	109.948	111.108	96.2553	101.634	103.259	110.67	107.832	99.8626	114.251	101.781	97.4387	104.005	101.583	100.131	108.596	97.2557	98.0897	111.156	116.624	117.108	103.308	104.479	112.429	102.904	97.9744	97.2815	114.88	104.489		104.851	6.33409		20
96.2485	102.839	110.593	111.862	96.1122	102.548	102.547	111.249	108.322	100.539	114.38	100.874	96.6728	104.132	102.092	100.564	108.156	97.1095	98.1375	111.152	116.06	117.024	102.42	104.296	112.05	103.318	98.9808	97.0544	116.178	104.832		104.945	6.40795		20.5
95.8119	104.515	109.529	111.421	96.0239	102.3	102.644	111.393	108.419	100.263	114.288	101.1	96.5372	103.29	101.258	100.641	107.567	96.5298	97.5797	111.29	116.287	116.796	102.36	103.691	113.07	104.057	98.7244	97.0207	116.603	105.048		104.869	6.51966		21
96.2588	103.728	110.12	111.412	95.9821	102.196	103.021	111.328	108.889	99.8532	114.606	100.652	96.7004	102.996	101.1	100.844	106.518	96.7125	97.8537	111.61	116.648	116.143	102.055	103.816	114.067	103.727	99.2017	96.3516	115.909	105.933		104.874	6.54214		21.5
96.3911	103.827	109.465	113.202	95.9476	102.074	102.976	112.305	108.913	100.576	115.282	101.141	98.7579	103.174	102.43	100.76	107.798	97.068	98.0942	111.15	115.899	116.598	102.825	103.968	114.389	103.383	98.1092	96.7416	115.74	105.798		105.159	6.50659		22
96.361	105.01	108.908	111.908	95.8883	102.087	102.291	111.906	109.46	99.2814	115.706	101.759	96.5444	102.867	101.718	101.228	107.285	96.8252	97.6081	111.548	116.256	116.944	102.779	104.371	115.355	102.455	98.3645	96.8546	114.861	105.135		104.985	6.6546		22.5
96.4192	103.949	109.949	111.496	95.6959	102.628	103.369	112.005	108.955	99.6084	115.549	100.491	96.9047	102.861	101.905	100.343	107.92	96.4193	96.9494	112.75	116.31	117.116	103.135	104.47	116.516	101.796	98.0301	96.7792	115.264	104.439		105.001	6.86357		23
95.952	105.375	110.615	111.287	95.5458	102.678	103.247	112.086	108.645	100.09	115.272	101.296	99.2265	103.1	101.902	100.694	108.046	96.9044	97.9243	111.872	116.975	116.492	101.715	104.855	117.501	101.587	98.4274	96.2498	115.927	104.276		105.192	6.80128		23.5
97.1447	104.848	109.678	111.867	95.8356	102.516	102.875	110.298	109.638	99.0119	115.348	101.187	97.7728	102.928	101.525	101.352	107.396	97.3387	97.3185	111.955	116.606	116.898	101.608	104.592	118.099	102.781	97.7686	95.4631	115.779	105.21		105.088	6.85545		24
97.6079	104.802	109.98	112.083	95.2902	102.868	101.998	111.47	110.517	99.4762	115.594	102.17	97.1143	103.288	102.629	100.731	107.786	98.101	97.9876	112.081	115.887	117.156	102.108	104.661	119.671	102.107	98.3242	95.8132	114.354	104.544		105.273	6.87253		24.5
97.0767	105.313	109.119	113.099	94.837	102.332	101.769	111.158	110.674	98.9276	115.843	101.886	98.126	103.78	101.609	101.955	110.175	97.2329	97.8314	112.401	115.798	117.098	102.405	104.659	119.635	101.558	97.331	96.0822	114.806	105.369		105.33	7.0487		25
98.1228	105.775	109.62	113.096	95.1209	102.345	102.35	109.419	110.481	99.6999	115.365	102.071	98.6103	102.808	101.317	101.255	110.632	97.2101	97.5707	112.658	116.76	118.104	101.654	105.028	120.531	100.346	97.9553	95.4499	114.117	105.267		105.358	7.12699		25.5
98.3084	106.241	111.167	112.91	94.8641	101.748	101.784	110.01	110.977	100.079	115.16	102.458	96.7185	103.536	102.331	102.069	111.055	96.897	96.9091	112.857	117.804	116.893	103.166	105.094	121.992	99.3545	98.4499	95.4618	114.182	105.138		105.52	7.35007		26
98.3442	105.918	110.857	113.617	95.1876	102.046	102.025	110.423	111.95	99.1875	115.434	102.978	98.4368	103.648	102.164	102.713	113.261	97.1194	97.3454	112.277	116.396	116.78	102.383	104.768	122.067	99.8941	98.2209	95.6163	113.169	105.666		105.663	7.24103		26.5
97.7565	106.441	110.581	113.95	95.2841	101.7	101.378	108.803	111.533	99.5582	116.617	102.704	99.8467	103.836	101.979	103.319	113.157	97.6013	97.8366	112.995	117.559	116.707	102.628	104.659	123.145	99.5628	98.4843	96.0001	115.164	106.935		105.924	7.42027		27
99.0214	106.338	111.961	113.64	95.2691	100.72	101.581	109.852	111.39	99.8306	116.099	102.85	99.1424	103.851	101.875	102.911	113.134	97.2835	97.0312	113.388	118.107	117.784	102.228	105.169	123.518	99.3339	98.1632	96.3325	114.022	105.96		105.926	7.54972		27.5
98.2879	106.821	110.365	114.547	95.1876	102.111	101.654	112.364	112.868	100.362	116.408	102.793	98.3639	103.277	101.539	104.213	115.389	96.7149	97.0396	113.114	117.82	116.84	101.254	105.319	124.024	99.522	98.0753	96.0303	114.41	105.963		106.089	7.77827		28
97.7052	107.021	111.916	115.036	94.5664	101.741	101.408	111.069	111.872	100.585	116.251	103.811	98.6434	103.691	101.272	104.81	115.866	96.3578	96.4263	112.655	117.113	116.879	101.908	105.385	124.287	100.532	98.2444	96.5231	116.198	106.503		106.209	7.83469		28.5
98.5363	108.629	111.406	116.107	95.0564	101.808	101.561	110.436	112.445	99.7801	116.586	103.524	97.5431	102.456	102.728	105.047	116.51	96.7554	96.785	113.331	117.66	117.694	101.982	104.233	124.112	100.609	98.2506	95.5607	115.197	105.827		106.272	7.95804		29
98.4354	107.803	112.705	115.757	94.8883	102.345	101.371	112.253	111.711	100.927	116.167	103.944	98.0444	102.264	102.111	105.393	117.647	96.1543	97.5343	112.735	117.454	117.802	102.112	106.079	124.875	100.246	98.4959	95.9691	114.206	106.345		106.459	7.9568		29.5
98.0079	109.519	113.197	116.004	95.125	101.285	101.598	110.06	112.058	99.7495	116.81	104.141	98.1435	103.134	102.918	105.99	118.459	96.6027	96.202	112.806	117.35	117.353	102.012	104.792	125.979	100.901	98.2118	95.3321	113.695	105.057		106.416	8.15564		30
98.3992	108.613	113.202	116.076	95.4598	101.552	101.245	113.214	113.77	100.652	115.959	104.998	97.1864	103.933	102.89	105.276	119.675	95.9934	96.4148	112.767	117.547	117.094	102.185	104.924	126.072	101.54	98.5246	95.9093	116.149	106.152		106.779	8.3007		30.5
98.3921	108.772	112.297	116.338	95.7146	102.008	101.496	112.804	113.735	100.644	115.852	104.416	98.1947	104.445	103.05	105.891	119.77	96.7662	96.1121	112.551	117.965	117.731	101.332	106.196	125.198	101.798	98.1581	94.5426	115.441	106.878		106.816	8.22111		31
99.398	109.879	114.003	117.347	95.8153	102.139	101.402	110.332	113.27	100.173	116.582	104.308	96.7562	102.994	102.658	105.962	121.853	96.2477	96.4449	112.979	117.302	117.357	102.32	105.176	124.074	101.714	98.5448	94.9645	115.46	105.043		106.75	8.30787		31.5
99.1532	110.304	112.308	117.991	95.8132	102.037	100.47	111.562	113.989	100.304	116.527	104.333	98.0436	102.822	101.145	106.595	122.261	96.7375	96.6114	112.983	117.682	118.416	101.506	104.833	123.82	102.259	98.4203	95.5847	115.981	106.072		106.885	8.38657		32
99.2349	110.963	113.059	118.465	95.1917	102.336	100.662	111.184	114.924	100.302	116.496	104.721	98.138	102.755	103.539	107.245	123.388	96.6354	96.7173	112.812	118.649	118.799	101.523	105.343	123.695	102.35	98.3923	94.9054	115.41	105.291		107.104	8.54761		32.5
98.7634	110.264	113.992	119.344	95.3797	101.567	100.986	112.914	115.018	100.321	116.164	103.854	97.046	102.73	102.905	108.351	124.037	96.3516	97.1661	113.189	118.309	118.451	101.598	105.184	124.046	103.196	98.1175	95.5429	115.373	105.08		107.175	8.70318		33
98.8068	110.589	113.333	119.716	95.2375	102.062	100.483	111.709	115.927	100.047	116.241	105.141	97.2583	102.459	103.287	107.95	125.619	97.1877	96.0442	112.53	119.454	117.644	101.464	105.627	124.061	102.85	97.823	94.7618	116.466	106.336		107.27	8.9087		33.5
98.2172	111.692	114.414	119.216	95.0984	101.378	100.763	113.308	115.979	100.914	116.695	104.337	97.9709	103.446	103.411	108.974	125.326	96.1091	97.1268	112.88	118.923	118.136	102.753	105.43	123.571	102.829	97.7749	95.8062	115.085	106.154		107.457	8.79463		34
99.5434	111.733	113.922	120.565	94.7411	101.764	100.375	113.861	116.322	100.65	116.779	105.494	96.5374	102.894	103.201	109.315	124.689	96.6787	96.8592	113.138	118.901	118.231	101.312	105.89	123.974	103.512	98.7424	95.2448	115.297	105.379		107.518	8.90906		34.5
98.4854	112.141	113.735	121.624	95.3306	101.786	101.154	113.706	116.026	103.065	116.321	106.023	97.2584	101.656	103.424	109.829	125.691	96.3873	96.9674	112.855	118.58	118.24	102.223	105.72	123.15	103.757	98.2312	96.0584	115.981	105.903		107.71	8.84345		35
99.5218	113.332	113.018	121.664	95.6617	100.752	100.82	111.357	115.843	104.586	116.339	105.379	97.2678	102.199	103.597	110.098	127.13	96.4798	97.0999	112.94	118.728	118.444	102.78	105.799	122.79	104.335	98.1702	96.7476	115.663	106.875		107.847	8.78408		35.5
99.6523	113.871	113.682	121.482	95.4227	101.994	100.492	111.683	114.708	106.094	116.415	105.897	96.825	103.665	103.66	110.718	126.815	96.4712	97.0188	112.699	118.931	119.753	103.542	106.833	122.856	103.691	98.4135	96.6315	116.81	106.114		108.095	8.80512		36
99.2901	113.379	113.44	121.206	95.5392	102.441	101.933	111.652	115.905	107.447	116.956	105.894	98.8752	103.517	104.973	111.561	127.072	96.7222	97.0378	112.251	119.379	119.286	104.387	105.802	121.671	104.222	98.0376	96.5379	117.316	106.299		108.334	8.64055		36.5
99.9728	113.347	114.202	123.041	95.7995	101.555	101.144	112.722	117.107	109.533	116.766	106.134	98.5339	102.208	104.793	111.781	128.115	97.0304	96.9727	112.769	119.928	120.228	105.965	105.897	120.992	105.155	97.3681	97.1362	117.848	106.91		108.698	8.92915		37
100.179	115.492	113.811	122.244	95.5859	101.64	101.33	113.075	117.764	110.943	116.958	106.635	97.0118	102.989	105.848	112.781	128.634	96.6799	97.6542	113.095	119.339	119.416	105.009	105.645	121.314	105.835	97.7772	96.8736	117.354	106.492		108.847	8.97594		37.5
100.394	115.578	114.102	122.315	95.5902	102.19	101.437	111.272	117.135	111.799	117.032	106.576	97.8766	101.685	105.986	113.164	128.911	97.4967	98.12	113.076	119.819	118.978	107.937	107.002	120.365	105.331	97.7408	96.3858	117.232	108.138		109.022	8.83128		38
99.0391	115.802	114.392	122.405	96.1098	102.767	100.887	113.419	116.454	113.721	116.243	106.232	97.5195	101.893	106.718	111.871	128.397	97.6282	97.1853	112.602	119.289	119.062	108.852	106.413	120.099	104.969	98.2842	96.1625	117.386	108.999		109.027	8.83114		38.5
99.5128	114.795	113.596	122.935	96.3821	102.541	100.718	111.938	115.801	114.62	116.002	107.114	98.0828	102.881	106.913	113.116	129.789	98.301	97.4918	112.536	119.778	119.082	109.642	106.383	120.102	105.017	97.9114	96.8524	117.463	109.428		109.224	8.7977		39
99.1629	116.457	114.975	122.629	96.3202	102.269	101.051	110.969	117.123	116.086	115.392	107.534	99.2491	102.726	107.531	112.598	129.916	97.8421	97.4786	112.599	119.458	119.498	109.764	106.185	120.97	106.575	98.0679	97.365	117.683	110.113		109.52	8.87708		39.5
99.8056	116.61	115.089	123.718	95.8049	103.803	100.909	113.283	116.919	118.061	116.093	107.245	98.5792	102.764	107.986	112.954	130.489	97.6719	97.7459	113.048	120.478	119.871	111.165	107.21	120.884	106.374	97.8341	97.1106	117.396	112.41		109.977	9.13244		40
99.5602	116.302	114.319	123.412	96.1101	104.715	101.256	113.472	118.239	120.118	115.708	107.493	98.7283	102.411	108.049	114.1	130.711	97.626	97.2781	112.976	120.673	119.449	112.49	106.86	119.916	105.687	98.1818	98.5349	118.905	113.634		110.231	9.16874		40.5
100.122	117.154	112.91	123.749	96.4887	105.99	100.963	112.116	117.423	121.094	115.361	106.937	98.2273	102.752	108.051	114.529	131.483	97.7949	97.6529	113.154	118.368	120.252	113.072	106.393	120.334	106.318	97.5562	98.4598	119.438	113.531		110.256	9.20365		41
99.76	117.341	114.192	124.587	96.3537	107.968	101.478	113.044	119.025	121.143	116.355	107.37	98.5829	102.762	109.137	114.875	131.219	98.0159	97.8033	112.904	119.526	120.191	114.315	106.186	120.316	106.624	98.2895	98.2226	120.376	115.434		110.78	9.33264		41.5
100.308	118.053	115.947	124.812	96.1435	109.379	101.397	111.902	118.002	122.604	116.604	108.436	100.038	102.338	109.605	114.213	131.597	97.9759	97.6068	113.858	119.368	120.067	115.067	107.088	120.018	106.851	98.4558	97.955	120.412	115.458		111.052	9.35364		42
98.9198	118.62	114.567	125.272	95.9637	110.125	100.769	113.543	118.776	123.858	116.413	108.796	99.1324	102.006	108.746	114.828	132.194	98.2398	96.5071	113.318	119.758	120.792	114.486	106.718	119.956	107.102	98.2667	98.6241	120.886	117.526		111.157	9.73072		42.5
100.309	118.883	114.859	124.253	96.2028	110.759	101.353	111.449	118.025	124.532	117.03	108.408	98.9914	102.339	110.198	115.087	131.806	98.1859	96.7472	112.922	118.69	122.238	115.949	107.574	119.446	107.605	97.3448	98.5267	120.104	118.034		111.262	9.6128		43
100.389	120.167	115.285	125.154	95.9333	112.07	100.928	112.923	118.795	125.35	117.176	108.379	98.9246	102.589	110.905	114.308	131.899	98.0054	97.1121	113.198	120.289	121.729	116.483	106.912	120.228	106.962	97.6107	98.6383	120.018	119.164		111.584	9.84987		43.5
100.533	119.743	114.527	124.929	96.8312	113.215	101.366	110.694	118.01	125.513	116.516	108.885	100.056	100.803	112.315	115.056	132.414	99.3507	97.5128	113.747	119.591	122.062	117.402	107.884	119.314	107.092	97.3557	99.631	120.569	119.905		111.761	9.68074		44
100.798	120.733	115.572	124.512	96.8038	115.201	101.254	113.925	119.618	126.634	115.917	109.144	98.163	101.71	111.571	115.396	132.274	98.1446	97.2091	113.215	119.086	121.863	117.766	108.229	119.851	107.341	98.7967	98.7999	119.231	120.895		111.988	9.8618		44.5
100.62	121.097	114.951	123.623	96.0285	116.099	101.19	111.85	119.692	127.692	116.81	108.435	99.0175	101.469	112.232	115.766	133.199	98.8125	97.4208	113.185	120.294	121.028	118.286	108.686	120.021	108.437	99.1876	99.1621	121.06	120.695		112.202	9.96705		45
100.19	120.902	114.58	124.783	96.6966	116.739	101.026	113.629	120.171	128.743	116.236	109.137	100.05	102.595	112.911	115.674	132.898	97.6948	98.9686	113.351	119.701	122.361	119.933	108.814	119.809	108.15	99.1135	100.043	120.527	122.089		112.584	9.98193		45.5
101.116	120.733	113.77	123.816	97.0055	117.334	101.025	111.199	119.973	128.461	116.057	109.071	100.4	102.047	114.681	115.766	131.771	98.4142	97.2476	113.179	120.186	122.781	119.72	108.747	120.761	108.851	98.8617	100.102	120.274	122.631		112.533	9.91323		46
100.68	121.68	113.726	123.52	96.9584	117.975	100.815	113.465	122.243	129.646	116.529	109.503	100.073	101.281	114.783	115.341	131.951	98.6661	98.0593	113.115	119.755	122.265	119.746	108.339	120.598	108.447	98.9911	99.4826	120.503	122.456		112.686	10.0931		46.5
100.978	122.153	114.46	122.697	96.9164	119.465	101.386	111.909	120.454	129.603	116.568	109.979	100.156	101.433	114.882	116.259	130.722	98.8509	98.6522	113.541	120.02	122.481	121.31	108.946	121.071	108.625	98.7463	100.286	121.149	123.9		112.92	10.0104		47
100.327	122.391	114.812	122.706	96.901	119.934	101.352	113.808	121.346	130.618	116.759	109.495	99.8314	101.825	115.398	116.25	132.132	99.2283	98.4789	113.484	121.225	121.964	120.819	108.36	120.983	108.519	98.9376	100.005	121.147	124.647		113.123	10.2638		47.5
100.454	122.06	114.881	123.142	97.2382	120.812	101.291	113.438	121.346	131.176	116.389	108.998	100.362	102.467	115.22	117.07	132.159	100.313	99.0513	113.577	120.808	122.468	121.663	109.71	121.065	108.453	99.1312	101.912	121.748	125.563		113.465	10.1663		48
100.679	121.301	114.85	122.225	96.9308	122.172	101.837	112.981	121.714	131.869	117.087	110.137	100.728	102.379	115.856	117.476	132.398	101.648	99.4821	113.64	121.207	122.132	122.174	111.579	120.96	108.311	98.9863	102.891	119.544	125.153		113.678	10.0176		48.5
100.985	122.719	114.509	122.226	97.656	122.649	101.951	113.672	121.781	132.281	116.389	109.786	99.7316	102.27	116.522	118.506	130.611	102.993	101.023	113.76	121.457	122.506	123.109	112.692	120.376	109.826	99.1262	104.442	122.465	125.881		114.13	9.91254		49
101.893	121.811	114.249	122.867	96.8247	123.363	101.876	112.604	120.871	131.53	116.24	109.744	99.4517	102.128	117.573	119.419	130.948	103.96	102.113	113.956	120.012	123.502	121.744	112.929	120.938	108.822	98.3265	105.955	120.627	125.101		114.046	9.76311		49.5
100.799	123.277	115.23	123.11	98.2993	124.294	101.599	112.809	120.359	132.538	116.655	109.545	99.5003	102.241	117.548	119.953	131.64	103.079	103.77	113.303	119.652	123.124	123.198	113.914	122.01	109.189	98.6832	105.293	121.163	126.027		114.393	9.97405		50
101.37	124.072	114.045	121.584	97.9622	124.428	101.906	113.561	121.462	133.198	117.014	109.427	101.018	102.182	118.173	118.692	130.19	102.409	104.103	113.745	119.931	123.287	123.778	114.483	121.801	109.032	98.5948	106.68	122.428	126.167		114.557	9.88376		50.5
101.457	123.069	113.672	123.032	98.2931	125.674	101.644	113.625	121.095	133.292	116.658	109.787	100.491	102.126	118.324	119.603	130.076	102.662	105.384	113.87	119.914	122.956	122.613	115.386	122.654	110.357	98.9246	106.734	121.604	126.448		114.714	9.82531		51
101.384	124.248	114.051	122.448	98.223	125.555	102.166	113.861	122.13	134.185	116.239	109.568	100.445	102.709	118.07	119.088	128.92	101.614	106.287	113.978	120.685	123.078	122.206	116.345	122.462	110.031	98.9053	107.828	120.645	127.055		114.814	9.82071		51.5
101.37	123.733	113.027	122.808	98.3777	126.478	101.961	114.204	121.225	135.018	116.159	109.776	100.553	102.029	118.659	120.081	129.242	102.361	106.568	114.179	120.335	122.495	121.589	116.56	121.598	109.992	99.1551	109.212	122.167	127.505		114.947	9.85821		52
101.912	121.95	111.756	124.068	98.1271	127.464	102.164	112.817	120.407	134.363	115.404	110.534	100.897	103.038	119.084	119.504	129.116	103.83	107.594	114.364	120.363	122.818	121.951	116.633	123.847	110.3	99.2464	109.455	121.432	128.491		115.098	9.74277		52.5
102.285	124.15	111.242	124.959	98.2553	127.491	102.791	111.255	119.194	133.978	115.528	109.556	100.297	101.61	118.628	120.66	128.712	105.011	108.781	114.405	119.387	122.609	120.872	118.189	124.152	110.117	99.2823	111.448	122.385	128.123		115.178	9.74367		53
102.41	123.376	112.08	124.679	98.748	127.595	102.447	111.691	120.131	133.611	116.02	109.624	100.029	103.858	118.549	121.038	128.553	106.61	109.721	114.459	120.763	123.252	120.67	118.627	123.595	110.509	99.1112	111.353	123.721	127.511		115.478	9.55072		53.5
102.183	124.333	112.66	125.164	97.8632	128.357	102.866	112.73	120.722	133.527	116.133	110.28	99.959	103.28	119.753	120.928	128.932	108.242	111.064	114.194	121.07	122.97	121.104	119.34	123.75	111.1	100.545	112.513	122.203	126.555		115.811	9.47008		54
102.611	122.8	112.963	125.496	98.0974	128.503	102.771	112.605	120.678	132.788	116.323	109.848	100.772	104.14	120.622	120.493	128.786	109.386	112.074	114.275	120.224	122.894	120.384	120.231	124.183	110.505	99.8659	113.029	123.564	127.446		115.945	9.357		54.5
102.56	124.109	112.178	126.425	98.2637	128.273	103.985	114.111	120.829	134.619	116.397	110.045	100.089	102.682	121.416	121.165	129.085	110.154	112.263	114.237	120.472	123.424	119.721	120.106	122.982	110.367	100.429	114.202	124.522	127.798		116.23	9.55623		55
102.538	123.998	112.837	125.942	97.9618	128.944	103.48	112.035	121.093	133.602	116.913	110.708	101.766	102.959	120.657	121.062	129.329	110.735	112.646	113.844	121.297	122.995	119.725	121.316	123.893	111.415	100.355	115.064	125.063	127.057		116.374	9.4403		55.5
102.689	123.45	111.417	125.457	98.4635	128.796	103.679	113.765	121.901	134.499	116.899	110.608	101.171	102.413	121.757	122.13	130.772	112.878	114.617	114.266	120.174	122.285	119.824	121.886	124.745	111.5	101.044	114.998	124.721	126.08		116.629	9.45099		56
102.894	123.965	112.121	125.349	99.4454	128.604	105.028	113.966	120.768	134.475	115.973	109.843	102.505	102.69	121.998	122.389	128.748	113.709	114.141	113.96	120.053	123.563	118.994	121.251	124.767	111.635	101.035	115.625	125.403	127.562		116.749	9.20863		56.5
102.996	124.388	110.294	124.373	99.3398	129.064	105.455	114.231	121.192	134.61	116.281	110.399	100.9	102.561	120.894	121.912	128.395	114.447	114.64	114.224	120.855	123.801	120.013	122.693	124.72	111.246	101.607	116.514	123.087	126.926		116.735	9.20654		57
103.679	123.988	109.4	124.416	99.3255	129.084	105.828	111.449	120.659	134.569	116.274	110.59	101.54	104.104	122.001	122.288	128.218	116.17	114.34	113.933	119.983	122.811	118.83	123.693	125.414	111.136	100.654	116.163	124.746	127.61		116.763	9.22472		57.5
102.817	125.236	108.899	125.126	99.8704	129.26	106.863	114.201	121.437	134.135	116.579	110.246	101.395	102.727	121.896	122.049	129.951	116.385	117.242	114.013	120.298	123.075	117.543	125.05	125.351	111.335	101.604	116.117	123.88	127.603		117.073	9.30946		58
103.204	124.45	111.683	124.407	100.573	128.824	107.93	111.908	120.745	133.095	116.761	110.73	103.648	103.169	121.585	123.081	129.096	116.905	116.66	114.085	121.077	123.3	118.236	124.1	125.598	111.782	101.557	117.219	125.483	126.596		117.25	8.85412		58.5
102.695	125.655	110.293	124.985	100.886	128.762	108.859	112.525	121.085	133.4	117.497	111.658	103.738	103.755	122.847	123.402	130.218	118.292	117.17	114.011	121.739	123.878	118.538	124.579	125.868	112.258	102.664	117.749	125.01	126.796		117.694	8.90943		59
103.327	124.697	109.965	125.13	102.544	128.791	110.226	114.304	121.315	133.469	117.191	110.852	105.408	103.653	122.226	123.241	130.023	118.698	117.59	113.839	120.312	124.259	116.998	124.473	125.077	111.416	102.173	118.21	123.039	126.059		117.617	8.55696		59.5
103.04	124.219	109.279	124.714	104.527	127.831	111.302	115.389	121.824	132.545	115.804	110.832	107.404	103.063	123.544	123.417	127.568	120.065	118.46	113.296	121.222	124.83	117.004	125.957	124.917	111.746	102.901	118.894	124.882	127.523		117.933	8.33564		60

## Sheet: 2
59.9969	51.8676	60.6116	69.5507	68.8566	64.7167	68.407	67.9945	50.0773	43.3077	62.7684	72.284	75.9479	81.3967	79.7078	77.146	87.5479
1	2	4	1	3	4	6	7	9	11	12	13	4	11	2	5	8
1329.41	1853.21	1414.33	1632.54	1761.01	2241.8	1513.25	1473	1891.91	2379.24	2171.94	1737.44	1401.06	1928.29	1401.73	1801.03	938.191		1698.2
1	1	1	2	3	3	3	3	3	3	3	3	4	4	5	5	5
100	100	100	100	100	100	100	100	100	100	100	100	100	100	100	100	100		100	3.44664e-15	17	0
98.8126	100.237	100.242	98.3707	100.335	99.8192	100.231	101.088	99.0115	99.3164	100.265	99.9357	100.026	99.5022	100.417	99.0642	100.992		99.8627	0.729309		0.5
99.8917	100.103	100.74	99.2813	99.1781	99.0612	99.5443	101.856	99.421	99.39	100.37	99.8111	99.2624	99.3071	100.295	98.5565	100.657		99.8074	0.773533		1
100.174	99.1035	100.545	99.1387	98.7778	99.1136	98.897	102.145	99.1359	99.4205	100.865	100.126	99.672	99.2941	100.055	99.1656	99.2137		99.6967	0.846383		1.5
99.8082	98.898	100.18	99.5043	99.2726	98.9208	98.9517	102.127	99.269	99.1237	101.346	100.409	99.9231	99.4253	99.9736	99.5634	100.582		99.8398	0.859434		2
99.3782	99.9954	99.5414	98.1459	98.9584	99.1723	98.0007	102.824	99.0611	98.8909	101.89	101.64	99.6001	99.0345	100.037	100.152	99.6883		99.7653	1.2468		2.5
97.9512	99.6567	100.486	98.5854	99.0494	98.5698	98.8017	104.08	98.5766	99.5018	100.974	102.287	101.065	99.0487	99.8789	99.3737	99.8067		99.8642	1.49908		3
98.1615	100.681	99.9238	99.3219	98.7498	98.1113	98.9997	104.356	99.2637	98.2583	101.208	102.661	100.294	98.8019	100.398	100.221	100.777		100.011	1.6062		3.5
98.7625	101.16	98.7666	99.0263	99.7323	98.2894	98.5024	104.904	99.2767	98.4457	101.741	103.169	99.4966	99.034	100.169	99.7628	100.093		100.019	1.7476		4
98.606	101.462	98.964	98.7846	98.6671	98.0558	98.0411	105.938	99.688	98.4279	102.933	102.556	100.465	99.3209	99.2591	98.9742	99.9188		100.004	2.04758		4.5
158.603	153.329	159.576	168.335	167.524	162.773	166.448	173.932	149.765	141.736	165.701	174.84	176.413	180.718	178.967	176.12	187.467		167.191	11.6334		5
153.704	147.649	141.333	165.534	163.348	162.084	160.396	172.258	136.53	143.631	161.534	164.779	178.364	179.459	165.966	169.983	178.186		161.455	12.6655		5.5
150.038	142.665	136.051	158.312	158.249	157.608	152.394	168.7	131.169	138.721	153.703	155.623	174.557	175.765	159.355	163.34	166.586		155.461	12.4296		6
147.928	139.49	134.329	153.261	154.036	154.041	148.358	165.476	128.431	128.116	151.124	152.879	165.104	171.918	155.207	159.693	159.669		151.121	12.1296		6.5
144.968	137.434	132.011	142.933	147.739	149.835	142.523	162.133	124.45	117.765	149.002	145.381	160.688	167.99	147.688	150.754	146.608		145.288	12.2646		7
142.997	135.423	129.387	137.53	146.223	147.713	137.387	160.314	124.099	108.651	145.348	140.341	157.167	164.31	139.225	146.142	139.324		141.269	12.8973		7.5
142.04	132.84	128.716	128.186	142.261	143.969	135.792	157.654	120.973	98.0378	142.497	138.134	151.201	161.045	136.114	139.512	132.83		137.165	13.9402		8
139.797	131.701	126.878	125.713	138.545	141.639	128.393	155.029	119.901	94.2861	137.834	132.987	147.208	159.184	134.284	137.26	125.464		133.888	14.131		8.5
138.389	129.752	126.504	117.534	136.799	139.261	127.101	152.561	118.131	93.151	136.17	130.673	144.776	155.033	132.664	130.629	120.17		131.135	14.0418		9
136.336	128.744	126.619	116.308	135.013	138.439	123.209	150.551	116.509	92.6523	132.479	128.543	142.598	152.221	132.411	129.018	115.742		129.258	13.8134		9.5
135.363	127.886	126.237	111.255	131.767	136.578	121.861	148.614	114.213	93.1016	130.626	125.741	139.377	148.856	131.24	126.473	108.598		126.929	13.8102		10
133.837	126.634	125.92	110.265	129.764	134.736	120.955	147.222	113.568	92.6018	128.004	125.142	137.694	147.545	131.604	123.648	106.861		125.647	13.6178		10.5
133.704	125.258	126.144	107.833	128.367	133.894	122.59	145.44	112.611	92.8972	126.691	123.689	137.932	144.477	131.703	122.743	104.151		124.713	13.5135		11
132.268	123.247	126.721	106.941	126.205	132.03	120.672	144.398	111.712	93.5621	125.383	122.057	136.304	141.48	131.165	121.517	101.032		123.335	13.2431		11.5
131.797	122.708	127.505	106.299	125.42	131.952	120.888	142.009	111.3	93.6617	124.555	121.142	135.735	138.977	131.88	121.007	100.695		122.796	12.9002		12
130.808	122.061	126.937	105.028	125.652	131.106	121.86	142.582	109.576	94.1639	123.474	119.151	135.39	136.436	132.2	121.117	100.452		122.235	12.846		12.5
130.779	120.437	128.062	104.17	124.24	130.228	122.469	141.509	102.455	95.3461	121.436	119.696	135.204	135.674	133.57	121.675	97.1955		121.42	13.4833		13
131.364	119.7	128.699	106.247	124.257	129.351	123.741	140.434	95.0215	95.9817	120.861	117.487	136.057	134.374	134.426	121.87	96.848		120.983	14.0054		13.5
132.686	119.755	129.505	106.62	125.53	129.418	126.241	140.21	92.9824	95.6388	119.924	117.741	135.421	133.374	134.219	123.01	93.192		120.91	14.669		14
131.517	119.094	129.306	106.875	125.602	129.346	127.212	140.728	91.9512	96.509	119.26	116.477	133.594	131.937	135.699	122.946	93.3716		120.672	14.6087		14.5
132.178	118.805	129.297	107.668	125.268	130.024	128.808	139.931	89.7876	97.4742	119.531	117.572	134.96	131.675	136.178	124.137	92.4175		120.924	14.9565		15
133.681	118.657	129.995	108.356	124.987	129.328	130.04	140.32	90.7215	98.7433	120.003	115.254	134.627	129.706	136.801	124.421	92.1384		121.046	14.8509		15.5
133.112	118.863	131.002	108.578	124.459	129.621	129.53	139.767	89.909	98.5357	120.281	115.618	135.208	129.649	137.612	124.649	91.5377		121.055	15.052		16
133.764	120.406	131.756	109.491	125.377	128.941	130.884	139.199	90.9754	98.8458	118.98	115.143	136.26	128.542	138.434	126.136	91.0063		121.42	15.0878		16.5
134.888	120.519	133.316	109.237	124.265	128.861	133.256	140.315	89.403	99.8629	119.524	114.976	136.368	129.052	138.895	126.744	89.7702		121.721	15.6867		17
134.204	120.414	131.793	110.315	125.863	128.394	133.341	138.268	90.648	100.54	119.118	114.383	136.211	129.549	138.472	127.166	91.1252		121.753	15.0527		17.5
135.81	120.251	133.24	110.059	124.885	128.552	133.868	140.076	91.3195	100.524	118.965	115.198	136.513	129.097	138.495	126.245	89.9345		121.943	15.3752		18
134.792	121.43	133.849	108.768	125.397	128.864	135.168	139.118	91.6767	101.436	119.68	114.266	136.389	129.064	138.956	127.379	90.353		122.152	15.3137		18.5
136.253	121.463	134.171	110.149	125.346	128.191	137.165	138.775	92.4379	101.473	118.185	114.992	136.484	130.494	139.417	128.402	89.0005		122.494	15.5733		19
136.549	121.545	135.318	108.025	124.813	128.132	136.699	138.993	92.2229	101.296	118.104	115.178	137.22	129.945	140.053	129.058	90.3895		122.561	15.6737		19.5
136.558	122.428	134.46	109.297	124.339	128.098	137.57	139.365	92.6647	100.662	117.745	114.812	136.197	129.646	139.04	130.08	89.656		122.507	15.6401		20
138.944	123.104	135.744	110.015	122.839	127.934	138.138	137.938	92.9846	101.741	119.24	115.853	138.322	129.791	138.727	129.966	90.5114		123.047	15.5529		20.5
138.68	123.396	136.474	108.504	122.924	128.162	139.137	138.084	93.0929	101.59	119.233	116.013	138.848	129.58	138	129.163	89.9625		122.991	15.7499		21
138.046	122.695	136.061	109.403	122.008	127.824	139.849	137.397	93.8989	101.343	119.596	115.431	140.441	130.311	137.933	129.947	90.3464		123.09	15.6753		21.5
138.338	123.068	136.846	110.006	122.457	128.979	139.752	138.128	93.953	100.935	118.841	115.573	138.831	130.66	137.461	130.521	90.9845		123.255	15.6116		22
138.201	124.162	137.445	109.681	121.421	128.837	140.564	136.897	92.9285	101.319	119.762	115.472	138.468	130.661	137.086	130.494	91.0587		123.203	15.6623		22.5
139.054	123.937	137.373	109.43	120.028	128.664	140.998	135.799	94.1344	99.7554	119.621	115.771	138.724	130.981	137.084	131.12	90.2946		123.104	15.8297		23
140.162	125.235	138.13	109.32	121.295	128.673	140.765	136.332	94.7916	99.5687	119.698	115.912	139.624	132.58	136.663	131.593	91.7458		123.652	15.8079		23.5
139.451	124.517	137.812	109.312	120.078	128.674	140.537	136.819	94.8219	99.8226	118.645	116.613	139.903	131.563	135.943	132.061	92.3658		123.467	15.6306		24
140.859	124.995	139.198	109.72	119.546	128.787	141.135	136.453	95.9219	99.7094	119.752	115.471	140.421	131.337	137.003	133.445	91.3247		123.828	15.9589		24.5
140.529	125.684	139.768	110.78	120.168	129.242	141.394	136.394	95.2453	99.629	118.932	116.58	140.382	132.573	136.867	133.227	91.4723		124.051	15.9961		25
140.408	126.085	140.154	109.171	119.277	128.842	142.076	135.945	93.2595	100.072	119.455	115.563	140.691	131.331	137.117	133.44	92.9101		123.87	16.1587		25.5
141.711	126.364	140.074	111.334	120.991	128.921	141.823	136.972	93.3965	100.25	118.402	116.86	140.39	133.029	136.898	134.344	92.406		124.363	16.1967		26
141.591	126.367	140.519	108.904	120.235	129.4	142.407	137.463	94.0168	100.322	118.845	115.46	140.661	132.563	135.918	135.239	93.6274		124.326	16.2306		26.5
141.57	127.295	141.469	110.083	118.852	129.101	142.517	136.648	94.2084	101.186	118.415	115.749	140.448	133.316	136.664	135.039	92.852		124.436	16.2474		27
142.602	127.253	142.519	110.097	119.661	130.391	143.355	136.202	94.3179	101.124	118.776	116.898	141.374	132.363	135.663	136.052	94.3869		124.884	16.2241		27.5
141.754	128.121	141.891	110.52	118.48	129.236	143.268	137.265	94.7699	101.241	118.153	115.439	140.735	135.068	135.707	136.415	94.6532		124.866	16.1995		28
142.697	128.831	142.471	113.004	117.957	129.988	143.311	138.104	94.5872	101.331	119.268	116.308	141.534	133.411	134.861	136.958	95.3025		125.29	16.1189		28.5
142.438	128.281	143.074	110.048	118.941	130.167	143.513	137.701	93.7786	102.966	119.125	115.76	141.337	132.421	134.541	136.198	95.5635		125.05	16.12		29
142.503	128.807	142.472	112.448	117.476	129.943	143.197	138.154	94.9422	102.644	120.075	116.032	141.418	132.477	134.914	136.397	95.6894		125.27	15.8825		29.5
141.197	129.224	142.496	111.835	117.053	130.142	143.674	137.606	94.9474	103.103	119.299	116.948	142.164	133.394	135.776	136.94	95.8005		125.388	15.9237		30
142.413	129.024	144.038	110.757	117.681	131.76	143.981	138.317	94.3171	103.84	120.532	117.195	141.914	133.564	134.992	136.751	98.3678		125.85	15.8783		30.5
141.849	128.954	144.322	109.521	116.692	131.067	142.738	137.594	94.3465	103.997	120.142	116.441	140.933	134.185	135.608	135.27	97.4878		125.361	15.8673		31
142.648	128.935	144.329	110.39	116.994	130.492	143.064	138.748	95.529	103.856	119.747	117.692	141.362	132.733	135.951	134.915	97.4844		125.581	15.7505		31.5
141.444	129.874	144.12	111.171	116.553	131.29	142.536	137.95	97.7717	104.486	121.909	117.361	142.609	132.939	136.008	134.642	99.47		126.008	15.125		32
141.868	129.949	145.353	112.689	116.651	131.474	142.346	137.943	100.452	104.736	119.668	117.552	141.463	133.406	135.939	135.832	99.5546		126.287	14.8522		32.5
142.348	130.66	144.234	114.396	116.281	131.103	142.21	138.844	101.644	105.678	121.008	117.137	144.21	133.279	134.159	136.144	101.257		126.741	14.4933		33
140.709	130.377	144.673	112.027	116.426	131.932	143.16	139.228	103.913	106.381	119.685	117.397	143.203	132.449	134.425	136.596	103.48		126.827	14.0977		33.5
141.46	129.903	145.688	111.298	115.9	131.475	142.444	139.616	106.075	107.813	120.998	118.654	143.297	132.962	135.444	137.195	105.436		127.392	13.7298		34
140.548	129.607	145.354	110.707	116.108	131.157	142.08	139.294	107.446	109.058	120.82	118.677	143.021	132.281	135.996	137.052	107.282		127.441	13.2197		34.5
140.681	130.366	145.798	109.691	114.896	130.795	141.918	139.518	109.302	109.876	122.471	118.753	141.968	132.786	135.763	136.776	106.896		127.544	13.0961		35
141.212	130.017	146.53	110.219	115.491	131.124	142.342	138.943	111.011	110.396	121.02	119.206	141.985	132.951	135.699	138.26	108.151		127.915	12.9089		35.5
141.908	131.014	146.371	110.105	113.912	131.245	142.83	139.672	112.783	111.849	121.233	120.967	143.591	132.061	135.304	136.821	108.428		128.241	12.8013		36
141.364	131.537	145.747	110.41	113.955	131.615	142.395	138.852	114.03	113.041	121.145	121.085	142.66	133.536	135.798	137.764	110.089		128.531	12.3246		36.5
140.233	131.178	145.649	110.876	113.76	131.664	142.239	138.111	116.152	112.716	121.154	119.348	143.085	132.458	134.228	137.351	110.361		128.268	12.0414		37
140.438	131.967	146.113	112.535	113.362	132.363	143.174	137.147	119.177	114.323	122.1	120.624	142.576	132.213	135.572	137.662	111.351		128.982	11.5829		37.5
139.73	132.176	146.43	112.619	112.971	132.141	142.903	138.291	121.207	115.29	121.809	120.996	143.508	132.237	134.513	138.145	112.268		129.249	11.4329		38
140.914	131.317	146.911	110.517	112.419	131.441	142.53	137.632	121.401	114.867	122.94	119.657	143.264	132.067	133.617	137.947	112.527		128.939	11.6701		38.5
139.81	131.284	146.987	111.661	112.446	132.003	141.711	138.318	122.826	116.11	122.88	120.249	142.079	132.263	134.086	137.525	113.388		129.154	11.166		39
141.331	130.372	148.34	113.003	113.012	132.882	141.751	136.545	124.637	116.99	123.538	122.243	141.776	131.088	134.149	136.882	114.353		129.582	10.7862		39.5
140.755	131.231	146.988	111.767	112.063	133.304	142.717	136.215	125.699	116.514	124.583	120.53	142.301	130.731	134.381	136.619	115.658		129.533	10.8667		40
141.276	131.265	147.662	110.555	112.515	133.223	142.379	136.565	127.26	117.438	123.965	121.619	142.266	131.179	134.185	137.223	116.121		129.806	10.8917		40.5
142.366	131.336	146.375	112.908	111.503	133.194	142.916	135.227	128.172	116.163	123.635	122.619	141.825	131.843	134.867	137.256	115.988		129.894	10.7566		41
141.851	131.401	146.995	112.644	112.616	133.498	141.537	133.884	129.318	117.394	125.465	122.649	140.971	130.552	134.488	137.539	117.829		130.037	10.2176		41.5
141.473	130.245	146.244	111.492	111.995	133.608	142.9	134.052	130.085	116.418	124.937	122.855	141.584	130.441	135.003	134.001	118.508		129.755	10.3632		42
141.526	131.094	147.287	112.074	111.652	133.092	143.004	133.647	131.269	117.193	124.933	124.507	140.828	130.184	135.727	134.56	119.837		130.142	10.2275		42.5
140.963	130.657	148.277	112.796	111.453	133.361	142.224	134.586	132.159	117.156	126.066	123.462	140.885	129.03	135.534	134.045	121.317		130.234	10.1318		43
140.709	130.963	147.592	114.838	110.96	133.227	142.827	134.985	133.588	116.508	126.276	124.862	141.563	129.7	136.039	132.811	121.06		130.501	10.0185		43.5
139.498	131.737	148.481	111.482	110.2	133.215	142.415	134.577	134.364	117.023	126.549	124.963	141.898	130.451	136.431	133.049	121.734		130.475	10.3946		44
142.319	131.856	148.133	113.328	111.698	132.775	143.142	132.36	136.259	117.136	126.284	125.45	141.826	129.698	137.189	132.793	122.731		130.881	10.1784		44.5
140.682	132.421	147.762	113.929	109.913	132.378	141.607	131.871	135.887	118.919	127.644	124.029	140.841	129.257	136.728	133.272	123.324		130.616	9.85752		45
140.178	132.215	147.129	113.259	109.093	133.676	142.264	132.672	136.928	117.975	126.417	124.877	140.413	129.446	136.601	133.121	124.358		130.625	10.0272		45.5
140.419	132.064	145.702	115.041	108.867	133.261	143.778	132.877	137.342	119.137	126.737	124.773	140.375	130.496	136.714	131.595	125.304		130.852	9.74265		46
140.882	131.8	146.923	116.312	108.845	133.673	143.118	132.025	138.318	117.868	126.544	124.905	140.61	130.438	135.748	130.827	125.395		130.837	9.82993		46.5
141.774	133.389	146.697	113.946	109.854	134.236	143.399	132.084	138.287	118.711	126.883	124.184	139.496	131.166	134.679	130.439	127.553		130.987	9.81307		47
141.062	132.183	147.296	114.079	109.087	133.153	143.581	132.264	138.206	118.465	126.442	125.393	139.135	130.943	134.322	130.825	127.468		130.818	9.85078		47.5
140.408	132.28	147.858	113.873	109.954	134.162	141.833	133.494	139.759	119.512	127.278	126.573	139.457	130.556	133.583	129.199	129.57		131.138	9.60913		48
140.219	132.365	149.037	115.658	110.761	133.634	142.49	134.08	140.396	118.092	127.919	126.201	140.123	130.375	134.241	129.05	131.104		131.514	9.66025		48.5
140.758	132.606	148.039	114.484	110.564	134.341	143.095	133.498	141.417	119.738	126.336	125.895	139.449	130.363	133.145	129.02	131.523		131.428	9.71016		49
140.145	131.834	148.087	114.228	109.77	134.459	141.944	130.895	141.626	118.428	127.749	126.153	138.031	130.791	133.467	127.462	131.52		130.976	9.74207		49.5
140.583	131.184	147.839	115.076	110.815	134.967	142.275	131.711	141.131	119.958	127.924	126.966	138.806	130.458	133.677	127.375	132.787		131.384	9.43176		50
140.284	131.04	147.615	114.657	109.987	134.724	142.332	132.828	140.552	119.419	128.835	127.204	139.022	129.929	132.188	127.699	135.31		131.39	9.56339		50.5
138.881	131.344	146.466	115.332	110.343	134.116	142.828	132.7	140.769	120.118	128.681	127.592	138.233	131.877	132.813	127.839	135.395		131.49	9.199		51
140.408	132.071	146.338	116.026	110.068	134.494	142.454	132.299	142.835	121.396	129.339	125.921	137.166	129.362	132.609	128.403	136.381		131.622	9.28513		51.5
138.952	131.842	146.634	116.284	109.671	135.14	141.939	132.7	141.911	120.418	129.172	125.358	136.838	131.029	132.656	128.793	138.096		131.614	9.30322		52
139.283	132.078	147.626	118.341	109.058	135.552	140.387	131.762	141.965	121.167	129.297	125.834	136.881	129.545	132.945	126.748	136.754		131.484	9.17645		52.5
138.066	132.303	144.913	115.673	109.63	134.693	141.761	132.668	142.331	121.34	129.689	127.149	136.463	129.855	132.444	127.463	138.213		131.45	9.08006		53
138.941	132.603	147.28	115.587	110.02	134.985	141.19	133.564	141.842	120.377	129.001	126.84	136.184	128.962	132.246	128.974	139.557		131.656	9.3588		53.5
138.008	132.033	146.294	115.85	108.497	134.159	141.848	135.181	143.238	122.356	129.648	127.697	136.505	129.399	133.367	129.059	140.935		132.004	9.47497		54
138.484	132.373	146.351	117.097	108.919	135.304	141.637	133.481	142.856	123.221	130.613	126.941	137.675	129.857	133.129	129.406	140.978		132.254	9.25366		54.5
138.809	132.367	145.369	115.932	109.743	135.905	142.073	135.097	143.036	121.928	130.699	127.277	136.33	129.013	134.172	128.897	142.804		132.321	9.42261		55
138.448	132.193	146.885	115.283	109.395	136.107	141.631	135.11	143.198	122.608	131.491	128.211	136.098	128.824	133.297	129.212	141.96		132.35	9.50098		55.5
138.351	131.895	146.88	115.99	108.718	135.456	141.204	134.333	143.349	123.787	130.667	127.489	136.246	128.088	133.61	129.943	143.77		132.34	9.57116		56
138.197	132.606	146.021	117.26	109.608	136.081	140.301	136.172	142.176	124.015	131.953	128.337	136.549	128.938	133.27	128.642	143.649		132.575	9.10977		56.5
138.049	132.984	146.211	118.593	108.324	135.292	140.981	134.443	143.777	123.652	132.008	127.909	134.835	128.876	133.512	128.393	144.391		132.484	9.3464		57
137.556	132.209	145.695	116.367	108.655	135.417	141.413	134.091	143.181	125.945	133.282	125.994	135.22	128.391	133.615	128.232	144.589		132.344	9.42026		57.5
138.166	131.557	145.384	118.1	108.489	136.248	141.007	135.354	143.224	124.328	134.184	127.05	135.039	128.095	133.038	127.631	146.826		132.572	9.53852		58
137.888	132.032	144.871	118.301	108.72	136.247	139.813	135.245	142.605	124.636	133.412	125.917	134.585	128.005	133.819	127.46	146.468		132.354	9.32742		58.5
139.166	132.139	144.26	117.963	108.509	136.399	139.957	134.391	143.23	126.143	132.817	127.504	135.251	127.98	133.67	128.752	148.191		132.725	9.4356		59
138.795	132.08	144.797	118.341	107.862	135.252	140.54	133.484	143.179	127.027	133.254	128.643	135.214	132.011	133.747	129.293	147.619		133.008	9.31406		59.5
137.652	131.417	144.14	118.87	109.292	136.745	140.39	133.276	142.042	126.307	133.293	128.749	133.537	132.066	133.434	128.733	147.494		132.79	8.91877		60

## Sheet: 0.82
-13.1639	-11.8802	-15.7754	-14.948	-16.7636	-15.1279	-14.7428	-17.154	-13.6084	-15.8373	-14.0101	-16.9536	-16.5896	-14.2872	-14.6247	-14.1991	-12.9998	-16.5561	-12.982	-15.2041	-12.9758	-11.056	-15.2337	-14.1631	-16.4556	-14.2891	-17.6464	-13.9716	-12.8986	-17.4833	-14.4138	-12.6782	-12.8323						0.371807
2	3	4	5	6	7	8	11	12	1	4	5	6	7	8	9	3	4	5	7	1	6	7	8	9	10	11	12	13	1	2	5	3
2646.42	1390.77	1608.96	2610.62	1317.28	2014.65	2761.46	1351.16	2684.64	1518.85	1919.4	1123.28	1453.42	1771.99	1354.36	1913.5	1436.85	1147.96	1907.94	1332.85	2720.83	1846.87	1254.48	1491.55	1297.91	2939.77	1340.2	1987.8	2134.07	1325.47	1914.43	1036.07	1318.35
1	1	1	1	1	1	1	1	1	2	2	2	2	2	2	2	3	3	3	3	4	4	4	4	4	4	4	4	4	5	5	5	6
100	100	100	100	100	100	100	100	100	100	100	100	100	100	100	100	100	100	100	100	100	100	100	100	100	100	100	100	100	100	100	100	100		100	6.54504e-15	1.13935e-15	33	0
99.2463	99.5186	99.738	100.362	100.345	100.288	99.726	99.1192	100.731	100.238	99.2858	100.68	100.37	101.298	100.113	99.9332	100.131	99.885	100.88	100.51	99.8076	100.21	99.7835	99.9577	99.3864	99.4296	100.396	100.14	101.091	101.118	99.4327	100.046	101.815		100.152	0.623419	0.108523		0.5
98.9991	98.6138	99.4696	100.293	99.7993	99.721	100.67	100.362	100.822	101.236	99.7743	99.8628	100.642	103.128	99.795	99.5418	100.524	100.03	100.653	99.4979	99.5256	99.4695	99.4149	100.457	99.3046	99.1647	99.8241	99.4294	100.736	99.9304	99.9312	100.638	101.341		100.079	0.831429	0.144733		1
99.0444	99.4462	98.3924	100.837	100.751	99.3976	100.695	100.342	101.939	102.123	99.5355	99.5976	100.912	104.044	99.9317	100.071	100.633	100.566	101.225	100.088	100.068	99.4957	100.588	101.869	99.8094	99.5035	99.2414	99.267	101.048	99.1362	99.6145	101.563	100.971		100.356	1.11183	0.193545		1.5
99.023	99.7788	98.8521	100.288	100.399	99.7345	100.518	100.488	101.964	102.915	99.6261	99.2986	101.352	103.857	100.659	99.6532	100.199	99.2431	101.052	98.4261	100.314	99.5763	100.2	102.044	99.7787	98.986	99.8397	99.2335	101.316	99.4948	99.5239	101.096	101.35		100.305	1.17974	0.205367		2
98.2136	99.1349	98.9578	100.484	100.51	100.258	100.234	100.519	101.708	103.494	99.036	99.8149	101.25	103.619	100.419	99.6185	100.063	99.8704	101.67	99.7506	100.099	98.418	100.636	103.526	98.8141	98.5297	99.0123	99.15	101.171	99.0038	100.391	103.197	101.859		100.377	1.47689	0.257093		2.5
98.4309	99.4116	98.611	100.649	100.52	100.368	100.132	100.638	101.796	104.192	98.621	100.865	102.069	104.645	100.301	99.8845	100.858	98.6437	101.825	99.1927	100.486	99.6158	100.561	103.334	99.1798	98.4655	98.7548	98.7328	101.938	99.1108	100.748	102.7	102.883		100.55	1.65756	0.288544		3
98.7702	98.4046	98.4897	100.827	100.882	99.7296	100.906	100.267	102.271	105.54	99.7367	100.589	102.265	104.114	100.7	100.427	101.447	98.4848	101.63	99.5844	100.048	99.1954	100.624	105.173	99.0299	98.6937	98.6413	99.109	101.623	99.6862	100.591	102.908	103.771		100.732	1.87597	0.326565		3.5
98.5624	98.8867	98.911	101.086	100.915	100.122	100.544	99.9673	102.153	106.053	99.1228	100.848	100.73	104.48	100.815	100.337	101.464	99.4649	102.397	98.3032	99.9496	99.8349	100.03	103.658	99.5098	98.0127	98.2146	99.4279	101.742	100.596	101.158	102.762	103.283		100.707	1.82377	0.317478		4
98.4021	98.4334	98.5282	100.276	100.939	100.136	100.566	100.463	102.34	106.711	98.6123	100.974	101.305	103.885	99.8533	100.311	101.826	98.5043	101.872	98.0303	99.8566	99.1726	100.04	104.419	99.2399	98.7147	98.0749	98.8885	101.836	100.511	101.446	102.7	104.033		100.633	2.02549	0.352592		4.5
85.2382	86.5532	82.7528	85.3284	84.1754	85.0077	85.8228	83.3094	88.7315	90.8735	84.6023	84.02	84.7152	89.5977	85.2286	86.1123	88.8261	81.9482	88.89	82.8262	86.8807	88.1166	84.8065	90.2558	82.7843	84.4256	80.4284	84.9169	88.937	83.0282	87.0324	90.0221	91.2008		85.9817	2.75323	0.479275		5
85.8966	86.1869	84.4731	86.0822	85.6827	85.545	86.1075	84.9999	90.3077	92.0453	86.3266	84.5746	85.8311	91.9737	86.6621	86.912	88.1191	83.1692	89.1014	82.9844	86.9394	88.9197	85.4042	90.001	83.5496	85.1869	80.8499	85.6327	90.2811	83.1932	87.8285	91.2349	92.7651		86.8111	2.85639	0.497234		5.5
86.4685	87.6946	84.4096	86.1503	88.212	86.7178	86.637	85.0469	91.1341	91.8336	86.5056	87.3019	85.1707	92.4141	86.5486	88.6658	88.543	81.8859	90.0341	84.1505	87.6812	89.436	84.9996	90.6641	83.3203	85.4096	82.4047	86.6689	90.6249	86.6422	88.552	92.9098	93.1403		87.5145	2.89552	0.504045		6
87.739	89.3586	85.4611	86.9548	89.1174	88.2437	86.5432	85.578	91.6921	93.8341	87.6749	87.1649	86.2688	93.7499	88.1976	89.4677	89.4537	83.2353	89.9761	84.1697	87.9048	90.2693	85.8416	91.7952	85.6739	86.1131	81.6022	87.636	92.007	85.3365	89.3915	93.4313	95.4192		88.3728	3.15347	0.548948		6.5
88.2173	90.2828	87.7429	87.13	90.0852	88.9683	87.2008	86.2158	92.2909	94.5288	88.8872	88.0001	86.8391	94.1066	87.6489	90.9374	89.7401	83.3717	91.351	86.0747	89.0018	91.244	87.7674	92.6517	85.7167	86.7888	82.3885	88.5233	92.8866	86.3358	90.9587	94.468	95.9909		89.2225	3.14896	0.548164		7
88.7791	91.1871	88.3067	87.0214	90.9937	90.1439	87.4391	86.2292	93.7042	95.1698	89.6158	89.8737	87.6636	94.629	89.3304	92.2783	90.0476	83.7742	91.484	86.2394	89.0214	91.8366	87.9323	92.5197	86.9589	87.4416	83.3277	89.5756	94.6289	88.3816	90.4204	95.297	96.7581		89.9397	3.20013	0.557072		7.5
90.1439	92.2233	89.0988	87.8859	91.0968	91.2078	87.3415	88.226	94.1654	95.6103	90.6157	90.0304	87.1995	95.6773	90.3374	93.0051	90.094	85.0723	91.6756	86.4509	89.9135	92.3547	88.0401	94.9241	87.3208	88.1024	82.9115	89.8112	94.2741	88.5664	90.93	97.3406	97.098		90.568	3.35184	0.583481		8
90.6258	93.0632	89.4887	88.3616	92.4087	91.7736	87.2006	88.3991	95.3382	96.613	91.324	91.0635	88.6861	96.8032	90.5354	94.3428	90.6749	85.7072	92.2745	88.025	90.1856	93.0313	89.8854	95.8581	89.0348	89.135	83.795	90.9463	95.3247	89.4428	92.0275	96.7274	98.3013		91.4062	3.34218	0.581798		8.5
91.1727	93.4277	89.8037	88.9327	94.3004	92.9542	88.075	89.0853	96.1324	97.3544	91.5647	90.9199	89.8747	97.8743	92.0035	95.033	92.0545	85.772	92.9125	88.1045	90.9306	93.3517	90.6009	96.5139	89.2328	89.8434	84.6456	91.1558	95.7884	89.3272	92.8749	97.8587	98.7138		92.0664	3.44264	0.599287		9
92.0235	95.2084	92.0588	89.3122	94.3183	93.3647	87.9263	89.9498	96.6249	97.86	91.9325	92.2643	90.4669	98.5395	92.2165	95.8463	91.6011	86.9343	92.4412	89.0018	90.9985	93.7203	90.3671	98.1414	89.6955	90.8344	84.4454	92.0685	96.6067	91.6148	93.3835	99.1466	99.4171		92.7373	3.54984	0.617949		9.5
92.3571	95.0246	91.8248	89.6691	95.6389	93.9848	88.4669	90.2571	97.3888	99.1038	92.4706	92.4228	90.0031	99.522	93.1119	97.0953	92.546	86.6653	92.6286	89.7268	91.5464	94.5005	91.1634	98.9818	91.7385	91.8216	84.7007	92.5612	97.6619	91.704	94.2699	100.412	100.03		93.3637	3.77476	0.657101		10
92.9503	95.5122	92.9712	89.8985	95.4065	94.3746	88.7563	90.4156	98.3867	99.8605	92.7796	93.0044	90.846	98.8181	92.8845	97.595	92.2539	86.5857	92.7215	90.4193	92.2022	95.0927	91.4316	100.205	92.451	92.5279	84.7427	92.6602	97.6917	91.4106	94.2802	101.883	101.072		93.7603	3.93836	0.68558		10.5
93.6096	96.3202	92.6204	90.8437	97.1425	96.1058	88.9533	91.2457	98.7823	100.702	93.5783	94.6994	92.0629	100.729	94.1573	97.8497	92.4891	88.7192	93.0167	90.8577	91.9071	95.1698	93.2477	100.015	93.1488	92.7813	85.5261	93.0678	97.8821	92.2397	95.5839	101.646	101.134		94.4798	3.80561	0.662471		11
93.9702	96.6179	93.7415	90.8877	96.9082	95.6888	89.8878	91.94	98.9396	101.441	94.0406	94.1638	92.1005	100.928	94.552	98.3053	93.5918	89.5105	93.8553	91.6837	93.2608	95.7533	93.0141	100.622	94.2296	93.7853	86.0248	93.596	98.3044	92.8981	96.174	102.306	102.049		94.9931	3.7458	0.65206		11.5
93.7755	96.1367	92.7647	90.9057	98.0282	95.9423	89.8323	92.2102	99.3506	101.549	94.0056	95.6155	92.2809	101.232	94.5449	98.704	93.5548	88.1181	93.6203	91.6023	93.0844	95.7292	93.3507	101.495	93.9722	94.8809	86.6346	94.0321	98.9452	92.7092	96.3274	102.554	101.872		95.1321	3.90307	0.679437		12
94.6295	97.3041	93.7528	91.7433	98.3694	96.4784	90.8055	92.8286	99.9013	101.938	94.3449	96.4145	92.8225	101.31	95.3262	100.359	93.3502	89.8583	93.8457	91.0148	93.6692	96.6647	94.4407	102.022	95.1691	95.9221	86.6571	94.5614	98.7605	94.3137	96.865	104.043	103.028		95.8337	3.94667	0.687028		12.5
95.0431	98.4221	94.5452	91.9783	99.1211	96.6253	91.1604	92.6421	100.168	102.392	94.9942	97.6068	92.9881	102.218	95.114	100.579	94.0389	89.9043	94.7249	92.8022	93.9254	96.8588	93.475	103.859	95.3798	96.4273	88.0621	94.4217	98.392	94.0989	97.6814	104.257	103.274		96.2782	3.9849	0.693682		13
95.4426	98.175	94.9281	92.2929	99.6911	97.4969	92.077	93.7472	100.18	103.099	95.4022	97.6072	92.4967	102.541	96.2862	100.376	94.1269	90.1914	94.8212	93.3993	94.864	96.4536	94.6076	104.978	95.6027	97.0991	88.0403	94.8212	99.0356	93.9565	97.1977	104.59	103.686		96.6457	4.0107	0.698173		13.5
95.4344	99.2884	95.5352	92.944	99.7824	97.1961	91.9281	94.1442	99.4822	103.583	96.3707	98.3125	92.4546	103.31	97.3347	101.711	94.2878	90.6148	95.1213	94.4977	94.521	97.0851	95.3763	104.856	95.7066	97.6182	88.8476	95.4301	98.9845	94.5741	98.3588	105.437	102.726		97.0562	3.95918	0.689205		14
96.5237	99.7762	94.6045	92.8943	99.8007	97.701	92.5309	94.5414	100.579	103.492	96.4463	98.4447	92.9253	103.122	97.2694	101.019	94.9726	90.5037	95.4119	94.1465	94.6275	97.1775	95.3159	105.728	95.2036	98.8492	89.735	95.8177	99.0007	95.1019	98.3422	104.931	102.988		97.2583	3.89625	0.678251		14.5
96.2246	98.771	95.7326	92.9518	100.743	97.5343	92.4502	94.8027	100.983	103.033	97.0127	100.18	93.3111	103.698	97.2907	101.471	94.5897	91.6956	96.0399	94.3261	95.2445	97.3195	95.6888	105.874	96.7831	99.1188	89.4592	95.7128	99.4777	94.527	98.8138	105.057	103.807		97.5674	3.92105	0.682567		15
96.6288	99.3018	95.3336	93.4419	100.524	97.6461	92.9514	95.7365	101.284	104.682	97.304	99.0725	94.4671	102.485	98.7003	101.525	94.5251	92.069	95.9129	94.6022	95.468	97.5522	96.1687	107.062	96.9249	100.306	90.2194	96.0937	99.9314	95.5341	98.9097	105.322	104.451		97.9435	3.90336	0.679488		15.5
97.2184	100.323	95.4501	93.6673	101.472	97.756	93.1337	94.9659	101.203	104.735	96.5129	99.5628	93.5211	103.638	97.6876	101.928	95.4345	93.0291	95.8429	95.1415	95.4348	97.8083	96.6225	106.657	96.8605	100.791	90.2151	96.1796	99.5371	95.5654	100.245	106.35	104.337		98.1462	3.99626	0.69566		16
97.1498	100.708	96.1558	93.5163	100.945	98.0905	92.625	96.1356	101.258	105.8	97.7599	99.2724	94.5781	104.012	97.7775	102.39	94.7941	93.0739	96.7567	95.5669	95.6903	97.5854	96.2095	106.437	96.9159	101.212	90.7074	95.9864	99.7813	95.914	100.213	106.456	103.936		98.3458	3.9649	0.6902		16.5
97.0756	100.652	96.999	94.1698	101.788	98.6081	92.7028	95.8566	100.951	105.718	98.262	99.9601	94.4783	104.092	98.901	102.029	94.7543	92.8847	97.1059	95.9437	96.5571	97.1857	96.2637	108.056	96.9869	101.94	92.3014	96.0677	100.117	95.1036	100.661	107.637	105.287		98.6999	4.12239	0.717615		17
97.6843	100.733	96.4509	94.1038	102.421	98.791	93.4756	96.203	100.693	106.211	97.6701	99.6067	95.5387	104.63	98.9844	101.617	94.5125	94.457	97.0513	96.0336	96.4285	97.6148	97.4306	108.479	97.0905	103.188	92.0768	96.6996	99.483	95.6681	100.152	106.901	104.84		98.8764	4.0081	0.697722		17.5
97.652	100.642	97.1513	93.9738	102.41	98.362	93.8041	96.2438	100.928	106.301	97.7691	101.47	95.4567	103.544	98.5879	101.94	94.5795	94.2277	97.2745	96.1685	97.3655	97.4373	96.4648	108.595	96.921	103.13	92.7029	96.9259	99.4381	96.7613	100.955	108.92	105.636		99.083	4.11929	0.717077		18
97.734	100.096	96.947	94.2891	101.942	99.3973	94.342	96.0789	101.155	107.098	99.0084	100.414	94.2488	103.864	99.2308	101.71	95.9479	96.2212	97.7205	96.7751	96.8717	97.2392	96.9842	109.148	96.8273	103.677	93.6755	96.5211	99.6453	96.2411	100.624	106.564	105.286		99.1977	3.89097	0.67733		18.5
98.0538	100.498	97.789	94.3449	102.047	99.4667	94.9853	96.0888	101.173	106.87	98.054	101.958	94.54	104.34	98.8726	102.195	96.0006	95.4251	97.828	96.1981	97.4289	96.9953	96.8164	109.797	96.0323	104.142	93.5483	96.7535	99.4788	96.9682	100.732	108.658	105.833		99.3912	4.14293	0.721191		19
98.1583	100.542	98.0018	94.4062	103.17	99.839	94.8186	96.0713	100.718	106.951	98.451	102.273	95.5571	103.603	98.9389	101.846	95.7483	95.7165	98.9248	97.5752	96.7021	96.9437	96.918	108.286	96.9678	104.514	94.5708	96.47	98.4797	95.7281	101.583	109.884	106.508		99.5414	4.09916	0.713572		19.5
98.2807	101.603	97.8605	94.8064	103.04	99.4413	95.5934	97.7235	100.269	107.08	98.5718	102.698	94.8481	103.603	100.505	101.661	95.1244	96.0259	97.711	97.4332	97.1777	97.0394	97.0638	109.207	95.5604	104.774	93.9046	97.327	99.2385	96.8155	101.719	108.506	107.091		99.6758	4.09892	0.713531		20
98.4567	100.739	97.3781	94.9318	102.82	99.5019	95.9657	97.9367	100.291	107.207	99.2491	103.079	94.8829	102.931	100.811	102.066	95.5176	96.8051	98.187	97.8548	97.102	97.4567	96.5038	110.035	96.1845	105.217	95.0129	97.1486	99.1151	96.808	101.637	109.203	105.766		99.8122	4.03462	0.702337		20.5
98.8422	101.265	97.6656	94.5109	104.394	99.2891	95.9652	97.6456	100.35	107.199	99.4746	101.744	95.8698	102.996	100.073	102.035	95.873	97.6235	98.8727	97.4651	97.4685	97.2898	97.4955	110.386	96.4156	105.934	95.4953	96.9224	99.6432	96.7482	102.301	109.912	107.167		100.071	4.14553	0.721644		21
97.5375	100.92	98.0088	94.5425	103.288	99.2223	96.3813	97.079	100.542	107.381	99.1656	101.885	95.7607	103.676	100.246	102.362	95.2246	97.4395	98.6237	98.0007	97.295	97.0875	97.4445	109.78	97.0031	106.567	95.6652	96.278	99.8091	97.5276	102.663	108.767	106.259		99.9828	4.03427	0.702277		21.5
98.3896	101.629	98.2888	94.6548	103.592	99.5765	96.8736	97.7052	100.97	106.951	99.4186	101.527	96.1533	103.161	100.004	102.508	95.3537	97.6785	98.5367	98.1572	97.5512	97.2778	96.4122	111.52	96.6344	106.584	95.5804	97.1227	99.8556	97.3099	102.599	108.855	107.287		100.173	4.14291	0.721189		22
98.3941	102.137	98.33	95.2452	103.635	100.213	96.6515	98.5225	100.503	106.755	99.9194	101.122	95.858	103.551	100.952	101.697	95.9908	98.421	99.1743	99.0272	97.4177	96.2454	96.9626	112.323	97.0663	107.761	96.0209	96.2696	99.9104	97.2345	102.961	110.237	106.931		100.407	4.27932	0.744934		22.5
98.7766	102.112	98.2201	95.5129	103.761	100.426	97.8373	97.9357	100.479	106.621	98.8503	101.614	96.0807	101.616	100.029	102.588	96.0153	98.7457	98.8346	98.6856	97.0857	96.7662	97.6722	111.641	97.7141	108.424	96.005	96.0231	100.055	96.9495	103.621	109.305	107.586		100.412	4.17249	0.726337		23
98.896	102.601	98.226	94.8764	104.221	100.335	97.3545	97.7385	100.624	106.285	99.6327	102.416	96.0465	102.649	100.042	101.524	95.4252	98.0897	98.7711	99.6028	97.6124	96.754	98.2666	112.174	96.8196	108.565	94.6903	96.0643	99.4934	97.2363	104.009	110.92	107.497		100.468	4.44252	0.773344		23.5
98.9452	102.326	98.6101	95.1678	104.419	99.9419	97.8083	98.1367	100.629	107.247	100.016	103.313	97.0818	103.188	100.477	102.063	95.4714	99.26	98.942	98.1476	97.3843	96.3644	96.7969	112.189	95.2959	108.656	96.3227	96.1545	99.9421	97.7032	104.673	110.21	107.059		100.604	4.42326	0.769991		24
99.206	101.41	98.0507	95.6356	103.687	100.134	97.6194	98.0361	100.886	107.621	99.1963	103.347	96.1786	103.145	99.9739	102.137	95.1272	99.4351	99.2632	98.7666	97.0774	96.9822	97.4791	111.938	95.7385	109.186	96.6133	96.7557	99.8273	97.3606	104.751	111.877	106.569		100.637	4.49228	0.782006		24.5
98.4723	101.864	98.935	95.3325	104.467	100.085	98.1421	98.9562	101.118	107.762	99.9399	103.689	97.0265	103.16	100.434	102.846	95.9257	99.514	98.7486	99.997	97.3097	96.5281	97.6471	113.053	95.3838	109.233	96.6302	96.8599	100.018	98.1523	103.858	111.689	107.638		100.922	4.54634	0.791417		25
98.3145	101.81	99.0276	95.4189	104.477	100.434	98.1199	98.963	100.896	107.236	100.597	104.143	96.5083	102.2	100.629	102.844	95.845	100.687	99.6072	99.0884	97.4199	96.7689	96.7974	112.256	95.9861	109.765	98.5004	97.0148	100.47	97.9903	104.509	111.836	107.332		101.015	4.44647	0.774031		25.5
98.6534	101.886	99.6684	95.686	104.807	100.652	97.9294	99.0924	100.334	107.437	100.374	103.071	95.4143	102.776	100.198	102.166	96.1915	99.2326	99.333	98.9501	97.338	96.3972	96.9337	113.255	95.5075	109.786	96.3646	96.9379	100.112	97.0376	104.258	111.36	106.581		100.779	4.57518	0.796436		26
99.0297	102.253	98.9118	96.2337	104.684	100.629	98.3355	99.5672	101.121	107.684	99.9668	101.622	96.5144	102.061	100.551	103.018	96.4242	100.957	99.6128	99.6178	97.4481	96.6998	98.028	112.315	96.0253	109.748	96.5671	97.8452	100.135	97.7249	104.242	111.678	106.724		101.029	4.33242	0.754178		26.5
98.5683	102.782	98.5408	95.3726	104.582	100.524	98.6974	99.3888	101.271	107.007	100.18	102.733	96.0993	103.778	100.099	102.789	95.6941	99.4705	100.311	99.8795	97.3281	96.2301	97.5589	112.691	96.3662	110.936	97.9618	96.9967	99.4801	98.5703	105.253	111.845	107.112		101.094	4.56188	0.794121		27
98.6574	102.058	98.8373	95.5935	104.345	100.686	98.9671	99.8302	101.217	107.037	99.4821	103.612	95.1571	103.461	100.4	102.203	95.1625	100.806	101.302	99.3152	97.0763	95.0444	98.8575	112.531	96.195	110.994	98.1565	96.8886	99.608	97.9734	104.628	112.568	107.101		101.083	4.64961	0.809392		27.5
99.1645	103.309	98.8841	95.7726	105.21	100.702	99.188	100.037	100.855	107.212	100.072	102.265	94.7606	102.459	99.8983	102.873	95.7419	100.323	100.691	101.167	96.8338	96.5308	97.7867	113.822	95.936	111.356	96.7912	97.1941	100.103	98.1422	105.767	112.132	107.821		101.236	4.7834	0.832683		28
99.0811	103.373	98.4628	96.0621	104.484	100.487	99.7418	99.9561	101.381	106.956	99.6612	102.531	95.3862	102.653	100.379	102.729	95.7606	99.3645	100.493	99.2185	97.0043	96.0864	97.1318	113.372	95.5372	111.317	97.6281	96.8657	99.6569	97.6607	104.893	113.302	107.588		101.097	4.80393	0.836256		28.5
99.093	103.268	98.8669	96.1694	105.584	101.178	99.3992	100.536	101.254	106.619	100.433	102.611	95.6145	103.391	100.51	102.689	96.0669	100.17	100.481	99.0723	97.3064	95.8681	96.834	113.91	95.8782	111.793	97.5286	97.5916	100.053	98.0102	105.535	113.009	106.827		101.308	4.7917	0.834127		29
98.5834	103.1	99.2933	96.0351	104.75	101.429	99.6317	99.8029	101.472	107.58	99.4996	103.549	95.3392	103.256	100.376	103.492	96.9017	100.193	100.039	98.9082	96.6779	96.7614	97.6477	113.359	96.7705	112.227	97.5628	97.6457	99.8497	97.6009	105.399	112.379	108.131		101.371	4.76654	0.829747		29.5
98.5916	102.521	99.3604	95.8926	104.903	100.905	99.8316	100.279	101.657	107.449	99.8618	103.363	94.5748	104.422	100.28	102.972	97.291	101.51	100.418	98.7213	97.1264	96.4081	97.5355	113.265	94.585	112.374	97.7259	97.2381	99.5866	98.1329	104.952	114.531	107.214		101.378	4.97447	0.865944		30
99.0698	103.127	99.0068	96.0576	104.711	100.9	100.091	101.534	101.801	107.214	100.604	101.918	95.0037	103.322	100.246	103.131	95.5387	100.802	99.934	99.8043	96.7613	95.7745	98.4924	113.423	95.4613	112.753	97.5604	97.57	100.409	98.9435	104.32	112.648	108.359		101.403	4.8275	0.84036		30.5
98.602	102.924	98.4967	95.8401	105.098	100.336	100.015	99.9471	101.506	107.914	100.133	103.021	95.7238	103.248	100.432	103.585	95.591	100.803	100.252	99.0396	96.7375	95.7948	97.3096	114.082	96.1015	113.201	97.2713	97.9045	100.094	98.2143	105.604	113.577	106.964		101.375	5.02541	0.874811		31
98.9713	103.063	99.4799	95.9705	104.954	101.133	100.115	99.5159	101.51	108.216	101.225	103.039	95.1547	103.768	100.496	103.173	95.9172	101.122	101.29	100.336	96.6326	96.2746	97.187	114.755	96.8325	113.203	96.9148	98.1076	100.524	99.054	104.688	113.577	107.566		101.629	5.00493	0.871247		31.5
99.1197	103.278	99.2731	96.2576	105.399	101.483	99.9863	100.208	100.561	108.5	100.246	101.92	95.6621	103.74	99.368	103.937	96.2028	100.608	101.415	99.9561	96.7548	96.0788	98.0985	115.062	95.1819	113.359	96.5777	97.784	100.47	98.2777	105.498	114.569	107.558		101.588	5.20366	0.905841		32
98.4005	103.038	98.7403	96.1179	104.685	100.687	100.562	100.143	100.577	108.933	100.248	102.441	94.0208	103.382	99.467	103.215	95.4377	100.706	100.96	99.9963	96.8936	96.4026	97.8437	115.452	96.1579	113.91	97.4973	98.994	99.6587	98.4953	105.427	113.527	107.365		101.496	5.20513	0.906096		32.5
99.6002	103.577	99.152	96.0999	104.235	101.639	100.628	100.307	100.189	109.46	100.132	103.421	93.8504	104.006	99.7369	103.636	95.5341	101.055	101.202	100.264	97.0752	96.3476	96.5527	114.512	95.5148	113.476	98.515	98.5359	99.8288	99.2392	105.04	113.857	108.026		101.644	5.17774	0.901328		33
99.621	102.643	97.8847	96.5609	104.399	100.927	101.273	101.39	100.777	108.588	100.733	103.561	93.9466	104.865	99.9115	104.027	96.3453	101.61	101.366	99.8591	96.6692	96.0414	96.7261	113.578	95.4127	114.127	98.0273	98.6285	100.219	98.6016	104.845	114.065	107.815		101.668	5.1344	0.893784		33.5
99.4461	103.666	99.5508	96.3185	104.164	100.817	100.494	101.06	100.935	108.893	100.701	102.92	95.1432	105.362	98.8862	103.668	95.6863	101.887	101.936	98.9923	96.7488	94.8411	97.5351	113.778	95.4877	114.081	98.1394	98.7345	100.243	99.5608	104.742	113.625	107.262		101.676	5.09023	0.886095		34
99.5059	104.135	99.8377	95.8116	104.943	100.918	101.118	100.363	100.427	109.871	100.899	102.542	94.5032	104.386	98.9476	103.466	95.9844	99.9674	101.87	101.152	96.4286	95.313	96.9819	114.975	95.495	114.74	97.9456	99.0933	100.23	99.7007	105.39	113.572	107.901		101.77	5.31748	0.925655		34.5
99.8146	104.125	98.2998	96.4678	104.302	101.787	101.037	100.1	100.599	108.968	100.533	102.384	94.8832	104.312	99.6775	103.743	96.0336	101.051	101.586	100.325	96.5889	95.2087	97.0117	114.724	96.1342	114.28	98.261	98.8506	100.003	99.6053	105.119	113.873	107.078		101.72	5.14955	0.896421		35
100.036	103.861	98.956	96.7251	104.517	101.263	101.604	101.042	100.666	109.391	101.386	103.743	94.6298	104.64	99.0683	103.974	97.2028	100.517	102.121	100.505	96.8743	95.4668	97.4077	113.747	96.1074	114.601	97.6416	98.5755	100.192	98.8629	105.5	114.286	107.621		101.901	5.14424	0.895497		35.5
99.4218	103.486	98.8128	96.7902	105.497	101.79	101.363	100.584	101.277	108.993	101.55	103.118	94.0568	105.484	98.4106	103.67	95.9435	101.29	101.914	100.906	96.901	95.5556	97.8632	113.36	96.6931	114.957	97.1958	98.6595	100.544	99.4945	105.5	114.584	106.639		101.888	5.17897	0.901543		36
99.974	102.762	99.2233	96.5061	104.657	101.365	101.44	101.304	100.511	109.23	100.556	103.364	94.3121	104.354	99.2523	104.007	96.0134	101.036	102.36	100.264	96.6614	95.4754	96.5361	113.584	96.2687	115.016	96.6649	98.9495	100.22	99.6472	105.221	116.041	107.384		101.823	5.35062	0.931424		36.5
99.8216	102.318	99.0673	96.7625	104.871	101.449	101.308	102.015	100.892	109.275	100.301	104.267	94.4147	104.689	100.249	104.751	95.9691	100.44	102.594	98.9351	96.7788	95.0732	97.2903	113.266	95.7378	115.025	97.6344	98.2393	100.262	99.7425	106.652	114.607	106.843		101.865	5.26279	0.916133		37
100.398	103.02	98.5949	97.4833	105.829	101.338	101.295	101.442	101.491	108.888	100.231	103.556	95.4675	105.48	99.9938	104.696	95.6451	100.694	103.497	100.202	96.6113	95.3538	97.6845	112.67	97.1089	115.545	97.9911	99.0598	100.616	100.966	105.535	115.703	107.345		102.165	5.18475	0.902549		37.5
99.8143	103.429	98.6152	96.689	105.475	102.183	101.606	101.279	101.285	109.665	100.048	102.348	94.6516	105.162	100.262	104.932	95.7037	101.741	103.849	99.5793	97.0842	94.91	97.3199	112.875	96.8604	115.953	97.1069	98.7322	100.886	99.3281	105.88	115.801	106.925		102.06	5.38077	0.936671		38
100.374	103.565	99.3514	97.0985	104.559	101.826	101.393	102.113	101.329	109.621	100.688	103.12	94.2443	104.927	99.9661	104.678	96.3451	100.861	103.945	99.5543	96.3023	94.7476	97.16	113.646	97.5943	115.725	97.7749	99.411	100.943	100.016	106.183	115.167	106.753		102.151	5.28546	0.920081		38.5
99.786	103.139	98.8661	96.5898	105.306	102.99	102.023	101.792	101.488	110.637	100.158	103.309	93.4001	105.188	99.2803	104.281	95.463	101.429	103.561	99.3972	96.717	95.3485	97.0686	114.694	97.6287	115.637	97.9703	99.5431	100.936	100.39	106.226	114.489	107.814		102.198	5.45291	0.949229		39
99.5268	103.171	99.0464	96.4727	104.731	103.284	102.443	102.509	101.417	110.118	100.595	103.712	94.2245	105.218	100.289	104.803	95.2828	100.851	103.245	98.7689	96.9779	95.9459	97.4289	114.93	98.756	116.409	97.4908	99.4737	100.423	100.829	105.564	114.64	109.223		102.358	5.46775	0.951813		39.5
99.8667	102.995	98.6647	96.5562	105.028	102.613	102.766	102.121	101.657	110.467	100.357	103.321	95.1055	104.859	100.231	105.257	95.6076	101.978	103.808	99.3673	96.5157	95.9251	96.8499	114.104	98.9933	116.22	98.3528	100.067	100.505	100.732	105.899	115.388	107.36		102.41	5.34553	0.930537		40
99.9061	102.73	98.3965	96.6468	105.423	102.904	102.759	101.945	101.448	109.948	101	103.972	93.5962	105.47	99.8824	105.588	96.3328	101.312	103.94	98.6746	97.0686	95.6075	97.1227	113.817	98.4634	116.637	98.136	100.068	100.215	100.14	105.445	116.013	108.164		102.387	5.49773	0.957033		40.5
99.7671	103.043	98.4121	96.7423	105.616	102.64	102.693	101.971	101.548	110.829	101.057	105.026	95.0035	105.697	99.4502	105.384	96.4654	100.896	104.288	98.2224	97.436	95.695	96.6579	114.841	99.5325	116.879	97.841	99.9378	100.356	101.097	106.235	114.856	107.595		102.537	5.48339	0.954535		41
100.096	102.415	98.448	97.4477	105.22	102.972	102.929	102.212	101.965	110.833	100.758	103.74	93.3796	106.355	100.022	105.977	95.8845	100.314	104.472	98.7049	96.2545	95.5852	96.6327	113.631	99.6915	116.235	97.2658	99.4115	99.4575	100.485	105.677	114.885	107.545		102.33	5.48542	0.954889		41.5
100.01	103.381	99.0214	97.0597	105.262	102.757	102.298	101.123	101.994	111.641	101.558	105.112	93.2497	106.44	99.9375	105.319	97.0061	101.213	104.006	99.174	96.7422	95.7382	96.7356	114.602	99.7546	116.968	96.7667	100.686	100.166	100.941	106.008	115.286	107.888		102.601	5.59903	0.974666		42
100.568	103.571	98.972	97.2035	104.945	102.985	102.813	101.902	101.779	110.79	101.841	103.613	93.9338	106.099	99.6158	105.877	96.0512	99.5336	104.099	98.7185	96.5002	95.2084	96.7801	115.224	100.492	117.13	98.3791	100.173	99.4052	100.178	105.594	115.716	108.009		102.536	5.64079	0.981935		42.5
100.8	102.335	98.6706	97.2944	105.316	103.531	103.092	101.157	102.004	110.992	102.481	104.42	95.1122	105.915	100.108	106.145	96.0362	100.684	104.17	99.9869	96.7287	95.8927	96.8884	114.677	101.356	116.723	98.4174	100.272	100.541	100.864	105.917	115.759	107.788		102.79	5.42847	0.944975		43
100.815	102.959	98.3972	96.6723	105.661	103.126	103.32	101.782	101.681	111.741	102.29	102.567	93.5693	107.534	100.231	105.822	97.0769	100.627	104.731	98.2789	96.6209	95.6451	95.3769	113.988	100.436	117.12	98.599	100.141	100.463	100.706	105.858	116.169	107.954		102.665	5.68338	0.98935		43.5
100.857	102.791	98.5336	96.8587	104.143	103.542	103.783	101.758	101.705	111.369	102.532	103.921	94.1707	106.375	100.392	105.892	96.5233	101.115	103.835	98.8936	96.8011	96.2461	95.3346	114.702	100.568	116.869	96.9313	100.261	99.9722	100.648	106.717	114.891	109.289		102.673	5.59948	0.974744		44
100.958	102.749	98.3872	96.7831	105.15	103.522	103.985	101.761	102.055	111.904	101.175	104.068	94.8045	107.235	99.8266	105.985	97.2106	102.94	103.324	99.5991	96.1121	95.4709	95.8524	114.194	101.851	117.1	98.0406	100.968	100.16	101.051	105.396	116.796	108.767		102.884	5.65584	0.984555		44.5
100.748	102.607	97.9869	96.2155	105.344	103.156	104.28	101.946	102.727	111.351	101.745	102.977	94.4985	107.277	101.162	106.466	96.2245	101.902	104.068	98.014	96.4847	95.6778	96.3477	113.957	101.739	117.582	98.3186	101.11	99.8689	100.64	105.657	115.332	107.978		102.769	5.59413	0.973812		45
100.639	103.986	97.9043	97.057	105.059	103.778	104.796	102.103	102.306	111.913	102.128	102.812	93.7911	107.31	100.367	106.254	96.9797	102.861	103.475	98.4449	96.6691	95.2053	95.1564	114.23	101.469	117.39	97.7631	101.145	100.15	99.9821	106.01	116.1	107.663		102.815	5.72822	0.997154		45.5
101.038	102.951	97.6177	97.0418	104.866	103.479	104.458	101.737	102.163	112.25	101.957	103.984	94.2508	107.765	100.225	106.633	96.6202	101.887	103.913	99.279	96.8366	96.1695	94.6596	114.388	101.368	117.005	97.4791	100.91	99.5954	100.097	106.154	117.661	107.996		102.862	5.84554	1.01758		46
100.571	102.81	98.4611	97.5126	104.886	103.921	104.439	101.504	102.329	112.581	102.098	102.948	94.5856	107.25	101.06	107.075	97.1481	101.777	103.698	99.2628	96.3753	95.6195	94.6998	114.64	102.761	117.552	98.1158	101.354	99.9537	101.3	106.756	116.498	108.185		103.022	5.75858	1.00244		46.5
101	103.169	98.9987	97.5605	104.98	104.745	104.297	102.482	102.511	112.241	102	103.254	94.2087	106.813	101.097	106.346	96.2865	101.126	103.958	98.3587	96.4446	96.3512	95.2004	115.312	101.712	117.474	98.0466	101.403	100.262	99.9068	106.548	116.687	109.3		103.033	5.81901	1.01296		47
101.241	102.812	99.1416	97.527	105.734	104.648	104.756	101.782	102.178	111.743	102.14	103.681	94.52	107.517	100.814	106.539	96.8193	101.66	104.5	99.0252	96.7739	96.2447	94.0837	115.155	101.799	117.524	97.1046	101.163	100.014	101.885	106.453	116.754	109.243		103.12	5.82733	1.01441		47.5
100.977	102.845	99.4187	97.9539	104.958	104.81	104.419	102.848	102.724	113.027	102.981	103.054	94.8879	107.266	101.336	106.633	96.2446	102.19	104.129	98.9802	96.2217	97.134	95.3878	115.113	103.028	116.957	97.8815	101.434	100.101	101.195	105.846	116.792	109.442		103.279	5.70285	0.992739		48
101.728	103.073	99.5036	98.253	105.201	104.788	104.921	102.093	102.895	112.368	102.262	103.073	94.1199	107.09	100.304	106.703	96.6466	101.941	104.579	98.6283	96.782	96.2151	94.9779	115.285	103.368	117.535	99.0671	101.791	99.6629	100.386	106.118	116.297	108.946		103.23	5.72961	0.997397		48.5
101.921	102.174	98.5707	98.2264	105.63	105.143	104.95	101.696	102.977	112.965	102.997	103.642	95.2478	107.402	101.521	106.947	97.3105	101.897	104.778	99.2243	96.8968	96.4615	94.2415	115.325	103.175	116.927	98.0973	101.496	99.8596	100.603	106.82	117.842	109.425		103.406	5.83741	1.01616		49
101.483	103.561	97.8073	98.8551	105.363	104.83	105.376	102.855	103.641	113.195	103.196	104.604	94.8973	106.784	101.872	106.882	96.374	101.56	104.611	99.1687	96.2326	96.1822	94.487	114.416	104.1	117.461	98.0054	102.263	100.533	100.971	107.074	117.269	108.771		103.475	5.81277	1.01187		49.5
101.601	103.59	97.7424	98.5093	105.749	104.394	105.72	102.674	103.813	113.157	102.825	103.319	94.4251	108.387	102.174	107.227	97.4444	101.258	104.666	99.383	96.5832	97.6426	95.4618	114.848	104.332	117.307	98.9426	102.426	100.069	101.217	107.173	116.854	109.785		103.658	5.7344	0.99823		50
102.173	103.067	97.9515	98.8649	106.486	105.806	105.808	102.207	103.111	113.336	102.369	103.975	94.4316	108.223	100.795	107.335	96.5125	101.618	105.013	98.8649	96.6116	97.4181	94.7587	114.624	104.246	117.272	98.254	102.117	99.866	101.17	106.841	117.06	109.637		103.57	5.85688	1.01955		50.5
100.989	103.486	98.3226	99.2193	105.287	105.764	105.492	102.012	103.564	112.662	102.956	104.497	94.4088	107.625	101.328	108.053	97.2579	102.722	104.768	99.2755	96.9327	96.4376	94.6414	114.757	104.278	117.521	98.4474	101.933	99.8222	101.236	106.463	116.575	109.295		103.577	5.74833	1.00066		51
101.894	102.803	97.9225	99.441	105.509	106.536	105.944	102.187	103.33	112.605	103.032	104.516	94.9114	108.355	100.887	108.297	97.2991	102.552	104.819	100.59	97.015	96.5247	94.2231	115.152	104.506	116.938	99.5382	102.021	100.913	101.233	106.526	116.668	108.289		103.727	5.66793	0.98666		51.5
102.638	104.179	98.3193	99.2643	104.615	106.799	105.132	102.557	103.075	111.853	103.474	105.432	95.5995	107.448	101.73	108.03	96.5559	102.51	104.856	99.5696	96.8427	97.3107	94.9099	115.01	105.067	117.814	99.7273	102.993	100.303	101.192	106.392	116.394	108.866		103.832	5.5856	0.972329		52
102.164	102.821	98.4892	98.719	105.373	106.441	105.445	102.095	103.936	112.126	102.997	104.953	95.8034	107.135	101.451	108.167	96.8746	102.686	105.002	99.7588	96.8225	97.384	94.1397	115.667	106.165	117.725	99.2053	103.125	100.552	101.184	106.739	117.528	110.369		103.91	5.80743	1.01094		52.5
102.868	104.51	98.8402	99.5883	105.643	107.838	105.382	103.225	103.621	113.49	103.179	104.546	94.7067	108.02	101.23	108.429	96.4859	101.708	106.132	100.065	96.8176	97.1706	94.7518	115.98	105.263	117.573	99.3617	103.254	100.732	100.623	107.078	118.027	110.136		104.13	5.95657	1.03691		53
102.471	103.645	98.7258	99.6352	106.398	107.299	105.896	101.802	103.667	113.252	103.174	104.775	94.9213	107.903	101.205	107.921	96.6165	103.398	105.617	99.8151	97.1135	97.2397	94.7442	115.307	106.099	117.696	98.9199	103.374	100.589	101.156	107.364	117.696	110.831		104.129	5.89503	1.02619		53.5
103.292	103.612	98.0313	100.023	105.083	108.28	105.873	102.227	103.794	113.887	103.314	105.493	95.4305	108.081	102.184	108.614	97.9594	102.281	106.201	100.766	97.1925	97.5969	94.9021	115.723	106.231	117.642	98.6442	103.944	100.751	101.441	106.847	116.96	110.453		104.326	5.79125	1.00813		54
103.468	104.358	98.4239	99.9831	105.11	108.204	105.957	101.514	103.961	112.322	102.533	104.625	95.8723	108.308	101.693	108.802	97.5696	102.107	105.273	100.877	97.2624	97.5013	93.5933	116.384	106.398	118.408	98.7772	104.29	100.297	101.625	106.803	119.041	110.902		104.31	6.0441	1.05214		54.5
103.602	103.973	98.8531	99.7177	105.48	109.214	106.429	101.542	104.403	112.402	103.267	104.797	95.7194	108.71	101.411	109.067	97.3835	103.94	105.132	101.24	96.733	98.514	94.729	117.352	107.571	118.298	99.1212	104.328	100.442	102.862	106.721	116.536	110.75		104.553	5.86788	1.02147		55
103.36	103.316	97.7927	99.8715	105.593	109.714	106.305	101.215	104.71	112.949	102.96	104.439	95.9052	108.771	101.654	109.119	98.5746	101.36	105.143	99.672	97.1179	97.8531	94.6317	117.001	106.704	117.9	99.6983	104.726	100.662	103.234	107.459	116.244	110.811		104.438	5.87279	1.02232		55.5
104.428	104.117	98.5969	99.7213	105.841	110.126	106.792	101.71	104.979	113.241	103.405	104.578	96.2266	108.294	100.648	109.474	98.3254	102.182	104.644	100.796	97.6983	98.4845	94.115	116.51	107.562	118.548	98.6645	103.944	99.9226	102.184	107.751	117.757	110.947		104.613	6.00813	1.04588		56
104.31	103.431	98.9487	99.7419	105.912	110.278	107.144	102.514	104.831	113.349	103.662	104.961	97.0242	107.84	100.786	109.707	97.5919	102.812	104.969	100.316	97.2798	99.2405	94.117	116.039	107.016	118.219	98.889	104.356	100.458	102.018	106.897	116.644	110.539		104.601	5.81306	1.01192		56.5
104.719	103.823	98.386	99.7111	106.216	110.355	107.493	101.079	105.157	113.149	103.996	104.725	96.7983	108.261	100.886	109.591	97.8702	104.166	104.987	100.369	97.1632	98.7417	95.2602	116.692	107.893	118.804	99.3215	105.198	99.881	102.903	106.738	116.479	111.095		104.785	5.89214	1.02569		57
104.609	104.649	98.8061	100.258	106.364	110.373	107.747	101.675	105.186	113.384	102.946	104.753	97.3992	108.348	101.428	109.948	98.5819	103.601	104.32	101.017	97.9746	99.6729	94.8167	116.813	108.481	118.555	98.3552	104.964	100.235	102.391	107.219	115.191	110.704		104.872	5.72618	0.9968		57.5
104.931	103.81	98.2361	99.864	106.177	111.083	107.439	102.02	104.536	114.082	103.757	104.914	97.5384	108.103	101.982	109.666	98.5647	104.244	105.102	101.843	97.6731	100.521	94.9229	115.404	109.183	119.109	98.7617	104.875	100.308	102.726	107.712	116.833	111.505		105.073	5.81247	1.01182		58
105.36	103.046	97.4429	99.8339	106.012	111.516	106.956	101.651	105.208	113.288	103.419	105.411	97.0085	109.019	102.094	109.963	99.0894	104.363	104.886	100.53	97.6751	101.257	94.7693	116.497	108.627	118.886	98.9379	105.814	100.062	102.559	107.905	116.039	111.7		105.055	5.87596	1.02287		58.5
105.66	102.654	97.4895	100.259	106.604	111.451	107.465	102.175	105.122	112.571	103.664	104.428	96.9435	108.668	101.615	109.528	99.0502	103.704	105.349	100.88	97.709	101.807	94.5925	114.787	108.66	118.634	99.655	105.818	100.354	102.977	107.382	116.284	111.896		105.025	5.69214	0.990874		59
105.895	103.547	98.7861	100.559	106.148	112.069	107.482	101.871	105.183	113.647	103.919	104.924	97.6501	109.27	101.773	110.262	98.5894	104.675	105.725	101.052	97.7981	101.959	94.7438	115.118	109.308	119.294	99.289	105.367	100.339	102.568	107.473	117.882	111.563		105.325	5.86651	1.02123		59.5
105.994	103.545	99.087	100.999	106.496	112.7	106.865	103.372	105.525	113.441	104.722	104.762	96.8616	109.289	102.081	110.544	99.0728	104.708	105.602	102.345	98.3501	102.255	94.8723	116.581	109.322	119.669	99.1638	105.036	100.172	102.952	107.071	117.439	111.725		105.534	5.87398	1.02253		60

## Sheet: 0.6
-34.1446	-33.8896	-33.3385	-33.4174	-32.1603	-25.6135	-31.1847	-27.1603	-28.4855	-27.3408	-34.0889	-31.6203	-31.7144	-26.4638	-32.5606	-27.8047	-25.4803	-30.4328	-32.9852	-30.3886	-29.57	-35.2962	-32.9289	-27.1026	-33.1874	-34.0734	-27.3721	-27.8616	-26.0368	-27.4197	-29.9225	-27.3973	-32.6205	-32.9002	-34.3178	-25.9431	-32.7604	-29.9335	-32.1202	-29.4737	-27.6098	-26.2834	-32.0747	-29.2961	-26.56	-25.8013	-30.1832	-35.9087	-32.3253	-30.026
3	6	7	8	10	12	15	17	19	22	1	2	6	8	13	14	15	16	2	5	8	11	12	13	15	16	17	18	19	20	21	22	23	2	5	7	8	10	11	12	13	14	1	3	4	5	6	7	9	10
1207.83	1553.33	1393.45	1710.81	1734.44	1367.59	1739.95	2762.58	2544.27	2267.96	1025.9	1626.89	1562.58	1595.48	1698.55	2767.16	1492.68	2413.42	1368.93	1999.05	1840.33	906.148	1409.44	2275.33	1437.02	1468.61	2870.23	1715.75	1584.98	1922.49	2024.73	1371	2089.09	1637.33	960.081	1435.15	1497.83	1874.71	1411.3	2040.17	1366.63	1629.99	1724.2	2626.4	2239.17	1954.9	2790.77	983.035	1580.65	2518.11
1	1	1	1	1	1	1	1	1	1	2	2	2	2	2	2	2	2	3	3	3	3	3	3	3	3	3	3	3	3	3	3	3	4	4	4	4	4	4	4	4	4	5	5	5	5	5	5	5	5
100	100	100	100	100	100	100	100	100	100	100	100	100	100	100	100	100	100	100	100	100	100	100	100	100	100	100	100	100	100	100	100	100	100	100	100	100	100	100	100	100	100	100	100	100	100	100	100	100	100
100.139	100.627	99.0643	99.2342	100.932	100.926	100.526	101.4	99.8968	100.07	100.664	99.3189	99.407	99.454	99.479	100.673	101.178	100.361	99.6364	100.619	100.462	99.9757	100.688	99.5703	100.759	99.6357	98.9542	100.983	100.349	100.051	99.6293	102.118	99.2655	99.655	99.035	100.359	99.5452	101.039	100.181	99.1639	100.092	100.232	100.405	99.5615	100.634	100.029	99.648	99.3644	99.8875	99.4049
98.945	101.7	99.1306	99.3209	100.179	99.7635	100.949	101.081	99.1591	98.9663	99.7338	100.032	98.5675	100.008	99.7938	100.66	100.907	99.4475	99.1899	100.405	99.9468	101.275	101.222	99.9153	100.817	100.255	99.9564	102.112	100.414	100.488	99.7208	102.519	98.7814	100.88	97.6592	100.75	100.434	99.8437	98.5542	99.8927	100.353	100.572	100.186	99.733	100.246	100.327	99.4841	99.295	99.2566	99.4893
99.1284	100.205	99.4693	98.5151	99.9366	99.7528	100.434	102.046	98.1177	98.7438	99.9176	99.2969	100.101	100.956	100.293	100.905	100.573	98.9844	99.9915	100.5	100.406	101.005	101.116	99.163	100.941	100.241	99.3595	102.001	100.837	100.623	99.5501	101.157	98.8817	100.87	99.6384	101.207	99.7789	100.194	99.3377	99.6189	99.7458	101.254	100.021	99.0973	100.533	99.984	99.6226	98.5343	99.4856	99.9329
98.9624	99.3544	98.3169	99.3076	99.5863	100.071	100.054	102.568	99.1665	99.2329	100.077	99.7466	98.8078	100.252	100.618	101.836	100.28	98.9382	101.07	99.852	99.482	100.984	100.769	100.317	101.031	100.187	99.3753	101.667	100.811	100.177	100.053	101.389	98.4143	100.332	98.148	100.239	99.5526	100.1	99.1746	99.3768	99.6683	101.002	99.1005	99.3733	100.049	101.057	99.7773	97.8113	98.9054	100.3
99.2041	99.0859	98.7855	99.8378	98.8757	100.344	100.09	102.646	99.0819	99.0034	100.216	98.8689	98.3535	100.97	100.277	101.439	99.6415	99.703	100.342	100.31	99.562	101.593	101.443	99.5682	100.716	99.9087	99.1679	102.203	100.782	100.864	100.193	101.738	98.8579	100.515	98.4792	100.71	99.116	99.9289	99.285	98.5866	99.7801	100.907	99.8114	99.5389	99.0579	100.162	100.295	98.3214	99.6168	100.35
98.0879	99.0738	97.8162	98.5334	98.1447	99.9019	99.5844	103.055	98.7954	99.511	98.8338	99.3136	98.6517	100.006	100.032	102.741	99.3394	99.9701	100.021	99.7258	100.28	102.105	102.148	99.5336	100.001	100.173	98.8142	102.013	101.6	100.532	99.2517	102.881	98.724	101.72	98.4106	99.1794	98.9194	99.5806	99.4654	98.7007	99.9668	101.277	99.1964	99.9334	99.5596	99.8925	100.577	98.0114	99.1438	101.045
99.1856	99.1488	98.3387	98.7454	98.2882	100.117	100.194	103.89	99.1866	99.0536	98.1884	98.2861	98.1045	100.225	100.306	102.465	99.6176	100.136	100.035	99.6265	99.7489	102.447	102.756	99.9256	101.595	99.4757	99.8122	102.608	100.826	101.123	99.1169	101.634	98.9538	102.431	99.8943	100.67	98.8844	99.214	99.0661	98.7998	99.1744	101.049	98.9487	99.5005	99.9597	99.6515	100.476	98.4538	98.4488	101.378
98.705	97.9903	98.7638	99.6916	98.7296	99.712	99.5326	104.31	99.6871	99.4077	98.8528	98.4419	98.1594	99.2118	100.124	103.243	98.8092	99.9739	99.7338	100.121	99.4902	102.338	102.579	99.5301	102.424	100.015	99.9428	101.851	101.221	101.435	99.0836	101.758	98.9806	103.063	99.0037	100.755	98.6286	98.2416	98.5576	97.7752	100.033	102.789	98.595	99.875	100.368	100.414	101.29	98.6175	99.046	102.454
99.4106	98.3427	98.7768	100.126	98.7426	99.9892	99.8118	104.788	99.4799	100.483	98.1244	98.4708	98.0795	100.365	100.098	103.909	98.8573	99.4066	100.359	100.029	99.284	102.604	103.051	99.764	101.79	99.2001	99.7908	102.184	100.803	101.34	98.5204	100.24	98.8214	102.878	100.588	100.266	99.5787	98.5085	98.7349	98.5454	98.8736	101.328	99.2744	100.636	99.932	99.6257	102.16	98.1469	98.0126	102.477
65.266	64.4531	65.4384	66.7083	66.5823	74.3757	68.6271	77.6281	70.9944	73.1423	64.0355	66.8505	66.3651	73.9009	67.5376	76.104	73.3769	68.9737	67.3734	69.6402	69.714	67.3075	70.1216	72.6614	68.6022	65.1267	72.4187	74.3228	74.7666	73.9205	68.5979	72.8427	66.2009	69.9775	66.2703	74.3228	66.8183	68.575	66.6147	69.0717	71.2638	75.045	67.1997	71.3394	73.3719	73.8244	71.9768	62.2382	65.6874	72.451
65.9679	66.975	66.3878	68.6944	67.5991	75.7893	70.0504	78.7617	71.8738	73.0867	66.5988	67.6917	66.2666	75.0422	69.0752	77.4	74.0911	70.458	68.1791	70.407	70.8217	71.3904	70.8519	73.8534	69.9411	66.5172	73.5298	75.7793	76.7102	73.7798	70.1539	74.5803	68.3743	71.2853	66.6125	74.8361	68.3055	71.4078	67.4113	70.5465	73.4841	75.397	67.3253	72.4272	74.2396	74.9421	72.0967	62.6755	66.9858	73.787
67.2347	69.1186	67.8208	70.5059	68.6003	76.5036	71.014	79.0081	73.8397	73.2645	66.592	69.2766	69.6937	76.9164	70.2521	78.2911	75.7019	71.6789	69.3561	70.8963	72.2323	73.0956	72.7589	75.1674	71.7322	67.8422	74.6372	76.401	78.3792	75.1657	70.8513	75.1696	68.8036	72.8947	68.5558	76.017	68.2925	73.0469	69.3663	72.3853	73.8822	77.3464	69.0655	73.7517	75.8976	75.3248	73.1155	64.9074	68.4417	74.6728
67.4433	70.9731	70.0362	72.5208	70.2534	77.9625	72.8875	80.6938	74.4395	74.8222	67.9204	69.7734	70.7659	77.7706	70.6822	78.9656	76.4223	73.3873	70.5199	71.8765	74.0101	74.0346	73.5453	75.836	73.9542	69.6578	75.3338	77.6468	79.9766	75.6881	72.0763	77.3117	71.2901	74.487	70.6508	77.8527	70.1448	75.2134	71.0691	73.797	76.0927	78.851	70.5404	74.8903	76.3515	76.6482	74.1165	65.1943	69.8148	75.779
70.3356	72.33	70.9129	73.6316	70.865	78.2153	73.4468	81.7281	76.5002	74.9153	70.1885	71.1686	72.468	79.3733	71.6085	79.6609	76.2766	74.4389	71.7891	73.3448	75.5438	73.8872	75.0603	76.3376	74.6632	70.7569	76.4154	78.3665	82.1154	77.6501	73.7609	79.1189	72.4449	76.0291	71.2132	78.2049	71.9582	76.1158	73.112	74.8339	76.6708	79.997	71.7768	75.7409	76.9663	77.5406	74.8734	66.5355	71.0306	77.2738
71.7462	73.9049	73.1154	75.5524	71.8679	79.4238	74.1269	82.8957	78.0671	76.5333	71.3018	71.7125	74.0131	79.5626	72.7701	81.3987	77.2865	75.8792	73.5146	74.5033	77.1828	75.2505	76.8131	77.0379	76.7622	71.6481	77.2725	79.2517	84.1055	78.5187	74.2142	79.7426	73.4496	77.3297	73.5018	80.1054	72.3769	77.9913	73.5638	75.8125	77.5054	81.8396	73.2352	76.9093	77.8223	78.2702	75.8971	67.9362	71.6249	78.0711
72.0814	74.966	73.7995	76.0559	73.7858	80.2122	75.4748	84.1983	78.5868	78.3432	72.8883	73.1406	75.7108	80.9053	74.292	82.6467	77.7711	76.727	73.9984	75.6845	78.5265	76.9523	77.6899	78.2306	78.9639	72.9457	78.663	79.8583	85.2954	79.7138	75.5969	79.7126	73.8938	78.146	73.7724	80.5798	73.3199	78.9919	75.1912	77.4485	78.5588	83.5704	74.4775	77.4323	78.7994	79.2782	76.8605	70.0824	72.2297	79.792
74.1878	75.7369	76.0524	77.3901	74.4139	81.3678	76.5314	85.3078	79.481	78.7849	74.4888	74.056	76.0996	82.4699	74.9638	83.6163	79.272	77.6322	75.0432	76.4168	80.1282	77.3897	78.8729	79.0092	79.5701	73.9145	79.3271	80.8817	86.5835	81.1038	75.6709	82.045	75.5379	80.0762	75.9194	80.7858	75.158	80.3472	75.8441	78.502	79.7847	83.7048	74.9303	78.5462	79.759	79.7414	77.7527	70.411	72.9204	80.7132
74.0172	77.6134	76.5336	78.2539	75.2447	82.1966	77.5626	85.7539	80.6788	78.85	75.0071	74.7541	77.7222	83.5945	76.4687	84.5404	78.6157	78.9188	75.9665	78.1124	81.3734	79.0954	80.6686	79.5654	80.8848	75.2654	80.3462	81.459	87.114	81.8294	77.0259	81.6518	76.7052	80.6507	76.8881	82.9314	75.5222	81.5218	77.2233	79.4634	80.5498	83.852	76.1413	79.2198	79.9142	80.8715	78.7817	72.3295	74.3474	82.4716
75.2531	78.2206	78.0827	79.2007	76.3137	83.6519	78.2791	87.3962	81.1803	81.0101	75.3341	75.6731	79.0291	84.3041	77.0805	85.685	79.4893	80.1322	76.9621	78.7371	82.919	79.8913	80.462	80.2893	82.1971	76.2515	81.3488	81.6038	88.7158	82.8791	77.578	84.9383	77.4465	80.9431	79.7428	83.3416	76.1729	82.8978	79.0416	80.5507	80.6035	84.8331	76.8104	80.3558	81.4247	82.087	79.8043	73.8221	74.6924	82.9779
77.2532	79.8025	78.8839	80.9762	76.9631	83.681	79.6411	87.9679	82.4973	81.5237	77.6646	76.5006	81.0679	85.453	78.141	87.0883	80.991	80.697	77.8721	79.7442	83.3944	80.2813	82.7198	80.8645	83.475	76.2822	82.6418	82.7736	89.6682	83.6159	78.0886	83.4796	78.7844	83.2382	80.8785	83.9003	76.6683	82.756	79.0906	81.3188	81.3064	86.2015	78.4491	80.9754	81.8025	82.1138	80.5199	75.752	76.8289	83.6754
77.3908	80.9434	79.3422	80.8511	77.7846	85.3474	79.6474	89.3527	83.0084	82.0291	78.8497	77.8366	82.1259	85.5462	78.7438	87.8339	81.1	81.6175	78.9689	80.5269	83.9827	79.877	83.1529	81.2626	84.6334	77.313	83.3445	83.7535	90.8206	84.9341	79.8413	84.7114	79.6553	84.5172	81.9584	85.4111	78.3744	84.1757	80.6961	81.8611	81.8713	87.8473	78.5828	82.1585	82.9382	82.9215	81.3082	75.9305	77.6497	84.462
77.9236	82.1593	79.852	81.8995	78.4534	86.4112	80.6568	90.4591	84.1383	83.2514	79.4457	78.892	83.2056	86.2983	79.7873	88.8799	81.7785	82.3877	79.8632	81.4888	85.1476	80.825	83.5234	82.1762	85.0359	78.0164	84.5573	83.6669	91.4546	85.4995	79.8667	85.3419	80.8556	85.645	82.2196	85.6676	79.0445	85.1722	80.8433	82.7423	82.6866	87.3747	80.2293	83.5131	83.0824	84.1336	82.1754	77.0776	77.8258	84.9965
79.2042	82.6299	81.7157	82.5352	78.6038	86.3569	81.4252	91.0913	85.2457	83.4414	80.5545	80.109	84.0622	86.4749	79.8361	89.4359	81.5165	83.4915	80.8109	81.4637	85.3197	80.9025	85.296	82.3344	85.722	79.4835	85.0812	84.4228	92.0336	86.8445	81.1273	86.5581	81.1696	86.0703	85.5219	87.183	80.3249	85.5693	82.2264	84.0032	83.0152	88.1667	80.949	83.7039	83.1902	83.9119	83.2771	77.9372	78.9604	86.143
80.7344	83.4996	82.8298	83.5285	79.2059	87.0997	81.856	91.7104	86.1528	85.0283	82.4279	80.266	85.1148	88.3295	80.9053	90.6417	82.3911	84.6707	81.1971	82.7693	86.6289	81.2792	86.7946	82.7898	86.9635	80.103	86.1295	84.8894	93.7831	86.6387	82.4218	87.1149	81.7324	86.2865	85.0574	87.8997	81.3358	86.3467	82.1542	85.6046	83.985	88.9554	81.8362	84.509	84.1682	85.376	83.6976	79.6371	79.153	87.1111
81.5208	84.58	83.8499	84.4392	79.8195	87.3908	83.4474	92.8812	86.5734	84.9529	82.5698	81.3391	85.775	89.1233	82.0444	91.2855	82.669	85.1409	82.2283	82.2823	87.4398	83.8567	87.2798	83.6209	87.7552	80.1692	87.0719	85.6124	94.4906	87.7471	82.7798	87.1349	83.1591	87.5948	86.5874	89.3796	81.7651	87.1703	82.9707	86.2202	85.4705	90.3122	81.569	85.9064	84.7421	85.8542	84.4848	80.6203	80.5573	87.2009
81.1557	85.6528	84.3945	84.8612	80.4031	88.0328	83.0348	93.8245	87.0645	85.9153	84.4319	81.3716	87.0177	89.8724	81.6966	92.0379	83.3931	85.8283	83.6654	82.7933	87.5217	84.4682	87.2961	85.0109	86.9921	80.7041	88.2501	85.6598	95.1321	88.2988	83.0971	87.114	83.5618	87.5969	88.0763	88.8897	82.657	87.9935	84.5818	86.9192	86.016	90.8222	82.7676	86.2564	84.8746	85.942	85.0227	80.3708	81.3085	87.4416
83.3857	85.7956	83.1243	84.9262	80.3143	89.0713	83.8131	94.3625	87.713	86.8657	84.9477	81.3657	87.2043	91.0188	83.4811	93.3512	82.8869	86.207	84.1583	83.0587	88.8985	85.5358	88.694	85.3307	88.9279	81.5786	88.6242	86.6712	96.0134	88.6785	83.4988	87.8234	84.0246	88.7283	88.4923	90.3112	82.4186	88.3626	84.0507	87.8331	85.3841	89.9792	83.4317	86.99	86.0177	86.2642	85.5856	83.5086	82.5611	87.915
84.345	86.9152	84.698	86.6286	81.0043	88.9967	84.0231	94.9592	88.7186	87.2542	86.0471	82.3552	88.934	91.5788	83.4727	93.6344	84.2538	86.9293	84.7304	84.0892	88.5344	85.4279	89.6043	85.5835	89.0367	82.3117	90.1457	87.0697	95.745	89.8329	84.2706	88.9955	84.8676	88.9911	88.6132	90.5013	83.8228	89.1825	85.2631	89.2055	86.3088	91.4239	84.0005	87.9168	86.2081	86.2646	86.3373	83.5999	83.1277	88.431
84.4558	87.5634	85.8784	86.6273	81.1019	90.6996	85.0812	95.5776	88.4046	88.4688	87.8983	83.0967	88.8672	91.2868	84.2998	94.5355	84.209	87.1055	85.3031	84.6262	89.988	85.0601	90.1255	85.9999	89.4887	82.5489	90.7622	88.8165	96.4367	90.5557	84.3826	88.7347	85.6981	90.173	89.4649	90.7883	85.705	88.5645	86.1262	89.2836	87.3093	91.7424	84.034	87.9912	87.0705	86.9378	87.5022	84.9118	83.0362	89.7288
84.2	88.53	86.3881	86.9287	81.4758	90.9847	84.8623	95.8124	89.5785	88.7322	88.3933	84.3057	89.8362	91.7431	84.1049	95.0627	85.4103	87.9865	85.7197	84.6195	90.2452	86.092	90.4155	86.0557	90.5063	83.3938	91.7473	87.8915	97.8077	91.697	85.4032	90.2406	86.3482	90.6957	90.7145	90.7423	85.4621	88.8845	86.1516	89.9639	87.8915	93.1159	85.2004	89.097	87.2705	87.806	87.2141	86.0575	83.2297	89.6801
84.2917	89.8717	87.0791	88.4102	81.7853	92.2452	85.5723	96.2967	89.5519	89.4786	89.9375	84.8764	90.5827	92.6632	84.7257	95.4535	85.2614	88.0835	86.1591	84.9804	91.0003	86.2258	91.4739	87.237	90.8729	84.0669	92.105	88.9096	97.3154	92.0547	85.505	90.7553	86.9208	90.7415	90.0054	92.6472	86.0747	89.2999	86.5419	90.2966	88.5428	93.178	85.5187	89.7674	87.9533	87.5017	88.6187	86.4758	84.7054	90.1653
85.9147	89.8628	87.8678	88.0397	82.3278	92.6729	85.9957	96.5902	90.4242	89.3534	90.9482	84.763	91.3681	93.0451	85.6586	96.117	87.0318	89.5147	86.5942	85.0931	91.148	87.8234	92.1736	87.7843	91.0629	85.2632	93.3325	88.8667	98.6948	92.9761	86.8581	91.758	86.66	92.2265	93.6953	93.0351	86.8581	90.578	87.6072	91.4144	88.5787	92.9365	86.4444	90.4636	88.3915	88.3044	88.6695	86.3796	85.6368	90.4986
86.9321	91.2236	88.6809	88.819	82.0868	93.1422	87.4579	97.1031	90.5509	89.5536	90.8248	85.8478	92.4826	93.7463	86.1091	96.3888	86.5372	89.2281	87.6942	85.7933	91.4824	88.8119	92.7264	87.9899	92.5906	84.8528	94.2049	89.9542	98.823	93.0195	87.1268	91.6346	88.1706	92.8925	92.3921	93.8541	88.1128	90.8264	88.119	91.5357	89.1901	93.5231	85.2872	91.0025	88.7277	88.4993	89.8956	88.4242	85.1925	90.8399
87.6038	92.0012	88.5611	89.6033	81.85	92.8001	87.8819	98.7555	91.6796	90.9206	92.3936	85.2168	92.6184	94.028	86.4144	96.8173	86.6437	90.0189	88.0325	85.8637	91.9408	88.6756	92.846	88.6699	92.1584	85.0203	94.7728	90.7764	99.3897	93.8089	87.7645	92.3301	88.0735	92.7431	91.6859	92.6979	87.7332	90.9293	89.1489	92.5175	90.1576	93.8966	87.2306	92.0316	89.0112	88.9364	90.3168	87.7493	85.1373	91.1367
87.6813	92.729	90.1613	89.9333	82.7971	93.7949	88.2037	98.187	92.1125	91.4402	92.671	87.161	93.4975	94.4473	87.3691	97.272	87.53	90.2893	88.5193	86.1876	91.6563	88.7594	94.2694	89.3548	93.1106	86.3266	95.3773	91.4036	100.164	94.019	88.57	93.4611	89.309	93.5856	93.7902	94.4276	87.7009	91.736	89.6736	92.776	90.1744	94.0826	87.5384	92.2596	89.6219	89.6644	90.4526	89.2538	86.3547	91.2435
87.9328	93.7747	90.1174	91.4674	82.7666	94.9118	88.5612	98.6877	92.2943	91.9781	93.697	87.2438	93.7671	94.7888	87.5507	98.1862	87.5192	90.9815	89.6411	86.5843	92.4412	90.7325	94.5284	90.26	92.5812	85.6838	95.9697	90.9111	100.278	94.87	88.2539	93.5063	89.3862	94.4478	93.5385	94.1991	89.7431	91.7118	90.8235	93.2633	89.998	94.3719	87.634	92.015	89.6455	89.8718	91.1488	89.3083	87.4418	91.8666
89.0526	93.9501	90.1099	90.6708	82.6352	95.014	88.515	99.7032	92.9218	92.2569	95.496	88.1226	93.4801	95.7943	88.6832	98.8271	88.5095	91.5421	88.8509	86.5867	92.6172	90.7148	95.0622	90.0337	93.5873	86.6264	96.8906	91.5106	100.003	95.4281	88.6157	94.2491	90.2061	94.6176	93.7735	95.7277	90.7372	92.3736	90.9495	93.7471	90.872	95.0106	88.0784	93.5256	89.6896	90.4503	91.801	90.8694	88.0467	92.242
88.1702	94.1935	91.5295	91.6705	83.3335	96.4976	89.0641	100.293	93.0057	92.602	95.9819	88.2648	94.1849	95.9953	88.6512	99.2594	89.4062	92.5933	90.1301	86.999	94.0769	91.1071	94.3261	91.7779	93.3644	87.0416	97.7029	92.1868	100.133	95.5587	88.9947	93.8137	90.3708	94.4614	94.7103	95.4829	90.967	92.3911	92.687	94.6347	91.1258	95.8744	88.3806	93.3256	90.2223	90.494	91.9837	90.634	88.2831	92.5703
90.1678	94.8764	91.4919	91.6208	84.0625	95.8102	89.5058	100.611	93.3745	92.8156	96.2398	88.2857	94.4635	96.6355	88.8521	99.372	89.4347	92.5893	90.1077	87.6419	93.6216	91.0917	95.3931	91.4724	94.1068	87.941	98.3492	91.6136	100.356	95.3704	89.1989	95.0501	91.3941	95.9761	95.9124	96.1934	91.6686	92.2671	92.213	95.03	91.179	95.8665	87.9719	94.2133	91.0609	91.294	92.542	91.4164	88.7185	92.5406
90.0419	95.964	92.3783	92.1109	83.3556	96.3785	89.6888	100.924	93.8636	92.9699	97.1264	88.9676	95.0121	97.4958	88.9473	100.004	89.209	92.9817	89.5729	87.7688	94.3682	91.2388	96.0653	92.2717	94.5493	88.227	99.0432	92.2867	101.415	96.2955	89.7371	94.706	91.4643	95.6266	95.4925	96.4463	92.3065	92.2837	92.1737	95.5142	91.6527	96.6345	88.9923	94.2155	91.1717	91.7855	93.0784	93.0011	88.9094	93.1214
91.6377	96.4779	92.637	92.7843	83.3189	96.0626	90.8984	101.782	94.7435	94.0073	98.3891	89.4739	94.8971	97.9607	89.2163	99.5966	89.9486	93.1645	91.6121	87.625	94.7297	92.4808	96.5979	92.9696	95.0143	88.9652	99.8607	93.0928	101.779	96.8086	89.88	95.1477	91.8127	96.4747	96.2162	96.4207	92.1654	93.1485	93.1119	95.4732	90.963	96.9577	89.4621	94.7451	91.6732	91.9333	93.8033	91.9447	90.0731	93.7969
91.4957	96.2436	93.209	94.0091	84.9654	97.49	90.6418	101.259	94.252	94.0456	99.8442	90.3803	95.8064	97.9503	89.8981	100.408	89.3553	93.3096	92.1148	88.1437	95.1298	92.2214	96.7063	93.8186	95.0142	89.0578	100.526	92.9711	101.972	97.7988	90.9258	95.968	92.5011	97.2996	96.6291	96.2813	92.993	93.1583	93.9264	95.8566	92.7526	97.3781	89.498	95.2842	91.4568	92.3343	94.3011	93.3907	89.8488	93.7729
91.9552	97.1648	93.4785	93.7334	84.1959	97.7203	91.0619	101.651	94.6005	94.45	99.1343	90.4692	96.3654	99.2068	90.8394	100.95	90.3669	93.8522	92.3083	87.5531	95.8916	91.5057	97.6682	94.0648	95.4981	89.9806	101.282	94.3718	102.128	97.8718	90.7799	96.4377	92.6068	97.1528	97.2831	97.9757	93.9793	93.7286	93.6221	96.5739	92.0785	97.5297	90.426	95.7759	92.2321	92.4981	94.4502	92.837	89.4275	94.2869
92.5011	98.0754	94.8648	93.4304	84.1441	98.3959	91.0849	102.453	94.5749	94.6531	99.604	90.7146	96.9249	99.4717	90.7873	101.612	91.5503	94.2682	93.5911	88.5596	95.9567	93.0305	98.2416	95.433	96.0413	90.9951	102.033	94.1892	102.42	97.5117	92.2021	97.5355	93.2293	97.2284	97.5509	98.7272	93.9303	93.6684	94.3014	97.307	92.8203	97.8194	90.7633	96.2424	92.0735	93.1349	94.8666	93.667	90.1638	94.9814
93.1553	97.9125	94.554	93.4556	84.9542	98.3202	91.4401	102.557	95.5435	94.969	100.817	91.0885	96.7934	99.3934	91.1449	101.917	91.6954	94.5958	92.2037	87.9973	96.3529	95.7908	97.9398	95.5564	96.6549	90.4822	102.186	94.1799	103.574	98.2528	91.2765	97.5401	93.6791	96.9383	98.0633	98.3182	95.1907	93.6976	94.5401	97.5841	94.0418	98.1655	91.283	96.3785	93.0642	92.8911	95.8886	94.5541	90.4609	94.6044
93.8897	99.4827	95.4933	94.7327	85.6091	98.9433	92.4749	102.7	95.709	95.2063	102.362	92.541	97.5772	99.8575	91.3308	101.895	92.2226	94.9839	92.9887	88.9612	96.3919	94.6206	99.2576	96.2082	97.0512	91.2093	102.47	94.8556	103.215	98.5542	92.2698	98.1389	94.1776	98.1036	100.594	97.1705	96.7916	94.3036	94.6235	97.4874	93.3083	98.0667	90.5948	96.431	93.2388	93.6849	95.8463	95.4007	90.924	94.7501
93.1578	98.8337	94.9368	94.9433	85.8689	99.4062	92.7073	103.143	96.5905	95.1858	102.075	91.7586	97.7083	100.432	92.5645	102.644	92.4355	95.1802	93.7049	88.6432	97.0781	94.6623	99.2135	96.2768	96.8698	91.1691	103.474	94.4497	103.598	98.6473	92.4466	97.037	94.7976	98.1	97.0307	98.9276	94.5945	94.0652	95.5079	97.8415	94.8352	98.3234	91.649	97.1931	92.7399	93.8331	96.0167	95.695	91.0912	95.5063
93.1848	100.447	96.6417	95.4774	85.4349	98.8858	93.4944	103.436	96.6128	96.1743	103.765	92.2487	98.0835	100.555	92.1674	102.808	92.8256	95.8921	94.2605	89.2573	97.8	94.3815	99.1882	97.0769	97.0308	91.6012	103.809	94.7828	104.058	99.0542	92.2856	99.9488	94.7117	99.3388	98.879	99.3252	95.2892	94.8437	95.8334	97.8659	95.3092	99.1519	92.0454	97.2283	93.7048	93.9905	96.6841	95.3132	92.0928	95.6758
93.9886	99.9276	96.7668	95.9559	85.7962	99.3618	93.5455	103.856	96.8871	96.2527	103.686	92.8828	98.4353	100.764	93.5663	103.202	93.6298	95.8806	94.0712	89.353	98.2901	94.5564	100.636	97.8764	97.24	92.4735	103.951	96.0116	103.508	99.9518	92.8056	99.0889	95.2911	99.2351	100.241	99.1835	97.514	94.9682	95.5579	98.5532	95.3938	99.2735	92.7489	98.3756	93.8557	94.588	97.2776	95.3754	92.8885	96.1311
94.2355	101.026	97.2457	96.8473	85.3371	99.5281	93.5913	103.792	97.1114	97.2373	104.791	93.6188	99.4046	100.95	92.6696	103.538	94.2247	96.0326	95.0422	89.4945	97.8964	96.2155	100.315	97.9259	97.2487	92.0957	104.829	95.7608	104.315	99.7153	93.2256	99.584	95.5481	100.12	100.081	99.5935	97.3897	94.9354	97.3583	98.8245	95.7653	99.5871	92.3056	98.0651	94.312	95.1024	97.4319	96.2458	92.2604	96.1081
94.8385	101.049	97.9147	96.5988	87.3022	100.861	94.0469	104.842	97.3542	97.0328	105.378	93.5835	99.3008	101.257	93.2612	104.028	93.2235	96.2158	95.1953	90.0738	98.7877	97.2128	99.7034	98.1325	98.4195	93.5033	105.361	96.539	104.636	100.197	93.4125	100.79	95.961	100.857	99.0978	100.181	97.2153	94.878	98.204	99.1938	95.4364	99.573	93.5054	98.7607	94.8779	95.0362	97.5044	96.8458	93.5463	96.1579
95.8657	102.534	98.5728	97.3588	87.3619	100.402	94.5613	105.245	97.9288	97.4405	105.854	94.0442	100.449	102.415	93.8898	104.338	94.3318	97.079	96.2326	89.8507	98.3971	98.2695	101.403	99.1062	98.9019	93.4574	105.85	96.7706	104.698	100.591	94.4162	100.442	95.7231	100.319	100.887	100.355	96.6875	95.3859	97.6795	100.071	96.2267	100.32	93.1297	98.928	95.4041	95.1247	98.0479	96.9816	93.2856	96.9383
95.1533	101.102	98.4051	97.5797	87.6542	101.023	95.4941	105.496	98.3994	97.5735	106.46	93.6649	99.5023	102.33	94.4941	104.572	94.4221	97.0039	96.1417	90.7007	98.8208	96.609	101.285	99.481	98.9485	93.0522	106.515	97.2818	104.921	100.755	93.9115	100.201	96.2672	100.411	99.9452	100.569	98.8557	95.2439	97.3888	99.7167	96.4318	100.862	93.6411	99.3298	94.8688	95.2211	98.4564	97.1862	94.1683	96.4611
95.7115	102.027	98.259	98.4617	88.3283	101.632	95.3573	105.261	97.9723	97.3412	106.088	93.9153	100.021	102.479	94.3466	104.683	94.4796	97.5873	96.8693	91.0006	99.3038	96.9651	100.905	99.6263	99.2581	94.3605	106.513	97.1799	105.151	101.452	94.1787	100.098	96.688	100.93	102.005	100.135	99.2384	95.9477	98.9215	100.134	95.5767	100.215	94.1392	99.6732	95.8154	95.9429	98.523	96.8362	94.7206	97.3068
96.6384	103.002	98.9078	98.1811	88.0278	101.155	94.8816	105.42	98.5008	97.7155	107	94.6657	100.054	102.621	94.5213	104.841	95.5704	97.3526	97.5093	90.5964	99.7225	96.7757	101.378	100.104	99.9964	93.6555	106.877	97.524	105.691	101.88	94.5223	101.219	97.259	101.074	101.287	101.754	98.7817	95.556	98.7352	99.8144	97.2654	100.841	94.4999	100.475	95.2873	96.222	99.1814	98.2239	95.1588	97.5905
95.7399	104.2	99.1766	99.4381	88.577	102.966	95.7201	105.923	98.9739	98.2122	106.92	94.2438	99.8349	102.908	95.4235	105.451	96.4279	98.3375	97.9387	91.337	100.549	97.2809	101.72	100.496	99.7597	94.6665	107.337	97.8903	105.76	101.916	95.8435	101.706	97.6844	101.091	102.338	101.117	98.9768	96.3256	99.423	100.454	96.5973	100.484	95.2823	99.9441	95.6552	96.9142	99.9439	99.2877	95.2861	98.0497
96.3567	104.162	99.3209	99.3718	89.3997	101.715	96.6393	106.223	99.5177	98.3936	107.376	94.3521	101.363	103.072	95.5025	105.396	95.4918	97.8609	98.1315	91.357	100.301	99.4464	101.991	101.378	100.016	94.5141	107.882	98.7975	105.734	101.356	95.1686	102.209	97.3388	102.233	102.554	101.261	100.141	96.1352	100.107	100.785	96.5706	100.588	95.2472	100.213	96.2595	96.9718	99.7305	99.0492	95.7936	98.6257
96.8311	103.883	99.7744	98.5214	89.8086	102.214	96.0946	105.79	99.3414	98.7793	107.81	93.8195	101.187	104.442	95.9114	105.565	96.2188	98.4809	99.5179	91.6065	100.898	98.6764	103.262	101.256	100.797	94.621	108.223	98.1623	105.365	101.482	94.9632	102.345	97.5713	102.12	102.692	99.9788	99.4339	96.1359	99.8161	101.198	97.2903	100.638	95.2709	100.415	96.5227	96.9507	99.9382	99.761	96.7434	98.6575
97.4418	105.163	99.9777	99.7546	89.7737	102.967	97.2443	106.686	99.7314	99.2908	107.469	94.6436	101.581	103.729	96.0024	106.2	96.0076	98.6484	99.8024	91.7047	100.81	100.708	102.454	100.979	99.85	95.6484	108.518	97.7996	106.347	101.784	95.6586	101.315	97.4313	102.879	102.943	102.024	100.572	96.7918	99.9152	100.836	97.4147	101.232	95.2478	100.585	95.6444	96.7995	100.164	98.6834	96.7395	99.1745
98.4246	105.464	100.633	100.518	90.3428	101.654	97.3148	107.234	99.7007	99.7489	109.365	95.145	101.946	103.701	96.3789	105.79	96.9886	98.9001	99.6011	91.7835	101.54	100.524	102.782	102.034	100.49	94.9554	108.91	98.1128	106.577	101.874	96.2535	102.877	98.5365	101.973	103.166	102.522	99.5622	96.2166	99.8301	101.685	98.5985	100.498	95.7492	100.442	96.1277	97.1669	100.772	100.232	96.9044	98.9126
97.5838	105.777	100.557	100.549	90.0571	101.951	96.8691	106.875	99.2894	100.302	109.318	95.6246	101.388	104.287	96.8745	106.097	97.6538	98.904	98.8125	92.5337	102.018	99.4429	103.555	101.828	100.939	95.9258	109.698	99.0264	106.609	102.355	95.8962	103.279	98.3055	102.731	104.391	102.657	101.049	96.7032	100.584	100.79	98.0842	100.723	95.8696	100.66	96.2992	96.7806	100.581	100.039	97.2425	99.1918
96.6692	106.17	101.465	100.381	90.585	103.525	96.8314	107.037	100.218	100.457	109.941	95.8816	101.477	104.045	96.5219	105.988	96.9598	99.6349	100.031	92.8742	101.84	100.899	103.717	102.693	100.623	95.6118	109.861	99.1361	106.919	102.754	96.5415	103.545	98.7287	103.695	103.109	102.969	100.583	96.8835	99.6527	100.804	97.888	100.992	95.5281	100.621	97.3027	97.0814	101.09	100.297	96.0482	99.3612
98.2112	105.885	101.637	101.02	91.5979	104.104	97.6276	107.111	100.68	101.762	109.777	95.9413	101.891	103.742	97.619	106.518	98.3692	99.5616	100.185	93.0828	102.183	100.834	103.748	103.097	101.624	96.3306	109.99	99.4452	107.389	103.35	96.8432	102.999	99.2241	103.989	104.463	102.083	101.28	96.8487	100.884	100.948	98.7228	101.086	96.2158	101.273	96.9308	97.4094	101.793	101.77	97.2205	99.1445
99.0382	105.748	101.868	100.249	91.5772	104.207	97.4366	107.538	100.683	100.743	110.379	96.0372	101.992	103.608	98.1695	106.85	99.281	100.103	100.833	93.3223	102.286	100.777	104.85	103.229	101.241	97.1288	110.209	100.065	107.974	102.858	97.2184	104.144	99.5713	104.004	104.298	104.068	100.856	97.2143	101.966	100.88	98.9453	101.04	96.6701	101.099	97.1659	97.4175	101.556	101.509	98.5726	99.8303
98.9996	106.168	102.12	100.841	91.2857	104.187	98.2609	107.502	100.917	100.772	110.628	96.3647	102.527	104.549	97.162	106.42	98.8603	100.266	101.589	93.9141	102.419	101.057	103.903	103.706	101.756	96.7725	110.468	100.347	107.115	102.81	97.3987	104.878	99.0481	103.974	103.975	103.936	101.75	97.0665	102.079	102.251	99.5086	101.732	96.7405	101.686	97.6262	98.4556	101.779	101.607	98.058	100.014
99.6649	107.355	100.778	100.779	92.5067	103.895	98.7239	107.531	100.865	101.201	110.786	96.53	101.876	104.052	97.8894	106.882	98.6094	100.954	101.21	93.5529	103.326	101.292	103.445	104.071	101.795	96.8069	111.202	100.395	107.051	103.322	96.6934	105.451	99.2744	103.482	106.048	105.21	102.507	97.2865	101.929	102.427	99.7061	101.654	97.1771	101.665	97.9843	98.4581	101.945	102.031	99.2744	100.255
100.271	107.07	101.212	101.279	92.792	104.116	98.756	108.025	101.448	100.937	110.962	96.9565	102.806	105.24	98.1574	107.616	100.22	100.83	101.025	93.4252	103.454	101.759	104.484	104.6	102.249	97.0296	110.959	99.6012	106.991	103.432	97.223	105.165	99.7393	103.39	105.228	103.681	102.669	97.8878	102.347	102.366	100.673	101.586	97.9008	102.231	97.8054	98.6938	102.025	103.02	99.2662	101.168
100.089	107.479	102.69	101.14	92.4863	105.03	98.6457	108.203	101.238	101.79	112.199	96.6429	102.476	105.28	98.169	107.177	99.5796	101.149	101.929	94.1729	103.967	102.505	105.714	104.536	102.356	96.9951	111.304	99.9777	107.58	103.661	97.4461	104.76	99.3682	104.072	105.674	104.73	101.831	98.05	102.198	101.637	99.5732	101.113	98.4824	102.318	97.2283	98.4242	102.508	103.78	99.9471	100.926
100.159	108.366	103.003	100.572	93.554	105.671	99.6143	108.232	101.57	101.771	112.226	97.7479	102.908	105.242	97.9988	107.743	99.8043	100.876	103.141	94.1083	103.648	102.348	105.735	105.85	101.821	97.6964	111.695	100.069	108.372	103.536	97.459	105.947	99.631	104.238	105.473	104.879	102.789	98.6495	102.727	101.804	101.498	102.227	98.3437	102.032	97.8555	99.0625	102.975	103.781	99.4707	101.392
99.8895	108.532	103.052	101.302	93.5607	104.56	99.145	108.42	102.192	101.53	112.501	97.9962	102.846	105.1	99.877	107.975	100.424	101.423	103.068	94.6524	104.321	102.362	104.975	106.13	103.36	97.503	112.136	100.065	108.113	103.875	98.1318	105.715	99.8747	104.954	105.99	104.383	103.192	98.6609	102.235	102.087	101.992	102.371	99.2984	102.273	98.0326	98.6332	103.22	102.671	101.029	101.855
100.564	108.975	102.058	101.558	93.6483	106.226	98.8736	109.821	102.041	102.671	112.503	97.3749	102.589	105.818	98.9381	108.505	100.142	101.965	102.762	94.1963	103.824	103.17	105.94	105.621	102.207	98.0255	112.204	101.16	107.779	104.384	97.9167	105.867	100.015	104.953	107.736	105.366	103.654	98.6793	102.282	102.786	100.369	101.392	99.4442	102.806	98.7335	99.5091	103.412	103.985	100.791	102.299
101.457	109.901	102.243	102.478	94.6169	106.27	99.6706	109.219	102.743	102.541	114.037	98.0297	103.401	105.635	99.1732	108.599	101.008	102.051	103.564	94.4114	104.614	103.327	106.439	106.188	103.577	98.2813	112.028	101.116	108.465	103.935	98.1203	106.515	100.497	104.577	107.403	105.427	103.222	98.9704	103.117	102.533	100.252	102.074	99.0744	103.182	98.1022	98.874	103.424	104.425	101.459	102.217
100.97	109.405	102.598	101.847	94.9017	105.887	99.5891	109.67	102.562	102.156	113.989	98.042	102.713	106.355	99.6646	108.518	101.433	101.899	104.373	94.6703	104.972	103.991	106.277	106.442	103.936	98.8185	112.767	101.838	108.291	103.396	98.94	105.173	101.091	105.636	107.88	105.46	104.045	98.8087	103.74	101.672	100.774	102.132	99.4788	102.972	98.9065	99.0802	104.213	103.584	103.112	102.569
101.003	109.621	102.645	102.237	95.8587	106.171	99.9574	109.611	102.736	103.042	113.323	98.7582	104.053	106.398	99.644	109.265	100.915	101.962	105.539	95.5012	106.293	102.83	106.091	106.117	102.977	99.4186	113.11	101.869	108.663	104.31	98.7808	105.755	100.962	105.788	107.549	105.975	104.143	98.8537	103.332	102.572	101.774	101.998	100.403	103.391	98.7122	98.9394	104.176	103.573	102.704	102.684
101.004	110.216	102.636	103.061	95.5116	106.654	100.568	110.327	102.777	103.232	113.823	98.6233	103.059	107.253	100.092	109.576	101.789	101.705	105.197	95.492	105.716	104.672	105.99	106.713	103.423	98.8107	113.184	101.408	108.877	104.111	98.8927	106.365	100.889	105.561	106.274	105.704	104.75	98.759	103.958	102.82	102.424	102.818	99.2227	103.606	98.6242	99.3045	104.828	105.104	102.682	102.576
101.826	110.227	103.157	102.213	94.9363	105.5	100.187	110.442	102.566	102.948	113.77	98.3267	103.352	106.908	99.7152	109.49	102.222	102.341	105.288	96.2547	105.535	104.368	106.833	107.274	104.768	98.3637	113.495	101.982	108.601	104.341	99.0355	107.182	100.581	105.699	108.647	104.69	105.393	99.3584	103.027	103.152	101.569	102.443	100.149	103.048	98.7589	99.8786	104.773	104.034	102.995	102.671
101.597	108.965	103.745	102.728	95.6816	106.411	100.736	110.749	103.089	104.11	113.869	99.1365	104.237	107.539	99.7196	109.822	102.423	102.589	105.5	95.9959	105.915	105.471	107.801	107.408	103.613	99.179	113.121	101.621	108.432	104.769	98.9433	108.233	101.167	106.544	108.109	105.872	104.856	99.2406	104.29	102.882	100.82	102.547	100.717	103.764	98.9418	99.8471	105.009	105.435	102.911	103.174
103.261	110.241	103.289	102.593	96.6702	105.219	100.504	110.053	103.005	102.92	114.236	99.1914	104.311	107.435	100.12	110.071	103.241	102.906	105.75	96.5748	105.743	104.184	106.951	107.779	104.454	99.9616	113.638	101.766	109.397	104.354	98.9355	107.268	101.173	106.835	110	105.187	105.353	99.0693	103.95	103.399	102.939	102.863	99.5408	103.798	99.5587	100.253	105.425	104.903	103.432	103.432
102.646	110.865	104.427	103.521	96.3635	106.67	100.905	110.713	103.082	104.066	114.942	98.6425	104.209	107.342	100.911	110.242	102.22	102.238	106.366	96.5135	105.919	105.269	107.371	108.195	103.429	100.399	113.4	102.072	109.51	105.039	99.6974	107.525	100.986	107.297	107.794	106.236	105.2	99.3783	104.214	102.866	102.95	103.428	100.577	103.602	99.4165	99.849	105.569	105.721	104.069	102.886
104.117	111.607	104.444	103.979	96.8706	106.414	101.616	110.844	103.525	105.387	115.002	99.3135	103.79	107.151	100.852	110.105	103.272	102.909	107.71	96.6171	106.809	106.197	107.653	107.372	104.756	100.307	114.35	102.038	109.634	105.001	99.8625	107.21	101.964	107.678	107.907	105.824	107.275	99.2806	103.628	102.674	103.469	103.667	100.771	103.821	100.206	100.566	106.028	105.723	104.407	103.607
103.615	111.734	103.681	103.756	97.3397	106.175	100.902	111.195	103.529	104.72	115.578	99.4163	105.825	106.427	101.015	110.112	103.256	102.048	106.787	97.0924	106.809	106.226	107.976	108.22	104.916	100.207	114.287	101.97	109.169	105.011	99.6617	107.856	102.198	107.475	109.169	106.244	105.879	99.4977	104.495	103.409	103.112	103.348	101.243	103.635	99.4284	100.352	105.803	106.214	103.917	103.339
104.104	111.243	104.531	103.625	96.7286	106.83	102.033	110.473	103.501	105.603	115.303	98.865	105.291	107.321	101.101	109.774	103.219	102.884	106.794	97.2097	107.38	105.928	107.19	108.013	105.284	100.497	114.082	102.938	109.218	105.141	100.2	108.271	102.009	107.918	109.193	106.518	106.434	99.9823	104.314	103.517	104.333	103.342	101.603	104.181	99.7682	100.277	105.807	107.803	104.683	104.176
103.161	111.638	104.498	103.185	97.6641	106.385	101.875	110.886	103.545	105.448	114.14	99.7165	105.875	106.712	101.84	111.106	103.969	102.765	107.569	98.2963	106.514	105.914	107.747	109.113	105.068	99.8996	114.694	102.222	109.043	105.588	99.6002	107.417	102.114	107.68	108.724	106.52	106.691	99.8891	104.966	103.044	102.912	102.674	100.859	103.835	99.3699	100.809	106.27	105.805	105.401	103.915
104.336	110.899	103.73	104.428	97.8052	106.869	102.608	111.112	103.627	105.651	116.277	99.1465	106.037	106.484	101.492	110.407	104.197	103.019	108.15	97.9149	108.051	107.447	107.923	109.015	105.474	101.057	114.861	103.09	108.77	105.79	100.964	108.017	102.39	108.361	110.111	106.978	107.144	99.3103	105.297	103.668	103.679	103.61	100.173	103.904	99.8557	101.637	105.911	107.044	105.865	104.213
104.304	111.288	104.356	104.46	98.3089	106.405	102.05	111.414	104.021	105.474	115.774	99.8509	104.999	106.583	101.402	110.771	103.661	103.026	107.584	97.9303	108.851	105.935	107.517	109.477	105.352	100.654	115.279	103.762	109.43	105.3	100.724	108.033	103.422	108.912	110.408	107.064	106.774	99.6237	105.102	104.234	103.452	104.069	101.278	103.849	99.9858	101.063	106.456	106.017	106.638	104.832
104.364	110.471	104.715	104.944	98.3212	107.445	101.668	110.942	103.478	105.745	116.159	99.2185	105.792	107.095	102.274	111.227	103.733	103.645	109.127	98.3074	107.986	107.585	107.955	109.436	105.509	101.366	115.521	103.751	109.395	105.441	100.279	107.978	103.073	108.47	109.749	107.81	107.747	99.5638	105.766	103.503	102.843	103.763	101.742	104.267	99.5672	100.805	107.131	107.22	106.341	104.797
105.703	112.294	105.726	104.332	99.2245	107.167	102.007	111.664	104.117	105.562	116.339	99.5047	105.702	106.815	102.327	111.223	105.244	103.361	108.088	98.8075	108.401	107.967	108.205	109.77	106.205	101.588	115.819	103.06	108.403	105.639	101.088	109.73	103.069	109.673	110.43	108.384	107.849	99.9841	106.524	103.691	104.029	104.367	100.919	104.989	100.48	100.597	107.485	106.454	106.388	104.61
106.228	112.335	105.558	104.749	99.3341	107.603	102.334	111.705	104.078	106.55	117.309	99.2123	105.615	107.211	102.479	111.8	105.02	104.075	107.215	98.8869	108.861	108.013	109.019	110.478	105.769	102.081	116.122	104.273	109.067	105.799	100.827	109.512	102.703	109.987	111.575	109.599	107.391	99.4011	107.753	103.804	103.424	103.757	102.033	105.172	100.638	100.899	107.547	107.016	106.364	105.025
105.868	112.675	105.216	104.721	99.2664	107.665	103.645	112.059	104.677	106.774	116.407	99.3264	105.861	106.725	102.81	111.788	105.185	104.455	108.862	99.3085	108.883	106.365	108.473	110.245	106.493	101.26	116.015	103.857	109.019	105.907	100.45	110.103	102.599	108.964	111.493	107.992	108.112	100.75	107.343	104.364	103.545	103.955	102.001	105.294	100.768	100.938	108.069	107.744	107.012	104.94
107.356	113.716	105.702	104.776	100.543	107.527	102.768	111.908	105.074	106.751	117.259	99.7027	106.666	106.55	102.564	110.976	105.814	104.703	109.236	99.6996	109.023	108.013	107.829	110.17	105.938	102.834	116.234	103.918	109.7	105.55	100.272	109.21	102.728	110.039	110.982	108.326	107.922	100.704	106.65	104.492	103.84	103.896	101.752	105.055	101.242	101.937	108.359	107.648	107.612	105.252
106.371	112.507	106.282	104.957	99.6776	107.853	104.188	112.309	105.101	107.184	116.837	99.6983	106.81	107.813	103.191	111.944	105.344	104.288	109.955	99.8995	110.334	109.596	108.499	110.05	105.775	102.699	116.676	103.95	109.79	105.715	100.536	108.922	104.151	109.736	111.9	108.855	108.345	100.896	107.41	104.301	104.18	105.391	102.731	105.181	101.197	101.891	108.184	107.755	108.19	105.762
107.121	113.013	105.85	105.037	100.561	107.397	103.632	112.702	104.778	107.262	117.061	99.6353	104.9	108.102	103.267	112.469	106.409	104.745	110.154	100.698	110.192	109.063	108.832	110.378	106.897	102.439	116.962	103.966	109.996	105.465	100.179	109.873	103.683	110.657	111.537	108.731	108.949	100.778	108.84	103.943	104.982	104.774	102.405	105.482	101.099	102.327	108.44	108.98	107.96	106.436
107.111	114.128	106.867	105.65	100.672	108.813	103.711	112.571	105.541	107.566	118.751	99.85	106.718	108.106	102.408	112.17	105.894	105.109	109.83	100.904	110.295	108.902	109.274	110.4	106.388	102.979	117.594	103.649	109.826	106.555	100.815	110.09	103.201	110.071	111.677	109.444	108.724	100.258	108.121	103.964	104.148	104.586	102.95	106.024	101.043	101.109	108.682	108.045	108.047	105.577
106.854	113.523	106.555	106.231	100.789	107.111	103.791	113.113	105.371	107.233	118.678	100.714	105.946	108.036	103.485	112.717	106.278	105.351	110.947	100.901	110.738	109.486	109.598	110.304	106.461	102.968	117.699	105.293	110.403	106.408	100.647	111.08	103.948	110.143	112.549	108.379	108.994	100.635	107.518	104.376	104.69	104.463	101.9	106.027	101.558	102.218	108.777	109.063	108.561	105.818
108.072	113.881	107.294	106.36	100.934	108.519	102.912	113.198	105.467	107.35	119.869	100.388	106.144	107.635	103.468	113.164	107.045	105.329	110.308	100.793	110.642	108.092	109.796	110.748	106.264	103.088	117.946	104.649	110.392	106.302	101.727	109.765	103.857	110.713	113.466	109.383	108.189	100.915	109.134	104.746	105.257	105.579	103.127	106.297	101.867	102.577	108.766	108.48	108.896	105.607
107.668	114.851	107.213	105.173	102.093	108.502	102.804	113.385	105.667	108.705	118.986	100.739	106.609	107.964	102.35	113.07	106.82	105.062	110.227	100.939	110.427	109.52	109.682	110.722	107.364	103.01	118.178	103.95	110.64	105.589	101.903	110.152	103.813	111.076	112.885	109.109	109.94	101.033	109.586	104.497	105.85	105.946	102.931	105.84	101.301	102.597	108.913	109.349	109.269	106.42
108.363	114.557	107.031	105.924	101.1	107.551	102.985	113.796	105.737	108.81	118.026	101.776	106.501	108.635	103.144	113.406	107.38	105.596	111.465	100.52	111.654	110.354	109.73	111.043	107.512	103.285	118.616	104.341	109.825	106.159	101.414	109.512	104.333	111.15	112.941	109.47	109.965	101.303	108.571	104.517	105.143	105.059	103.013	106.91	102.163	102.505	108.936	109.93	110.083	106.804
108.978	113.769	107.37	106.062	102.179	108.258	103.595	114.233	105.47	108.922	119.064	101.488	106.358	108.341	104.251	113.582	108.332	105.544	111.048	101.406	112.258	109.152	110.583	110.666	107.304	103.326	118.604	104.787	110.062	106.706	101.809	110.206	104.272	111.519	110.825	108.701	109.628	101.053	109.83	104.978	105.011	105.642	102.781	106.74	102.434	102.985	109.142	110.005	110.981	107
109.198	114.221	107.44	105.944	102.695	108.642	103.897	113.372	105.911	108.688	118.376	101.39	106.359	108.543	104.008	113.895	108.331	105.547	111.373	101.659	111.978	109.028	110.517	110.328	107.822	103.397	118.841	104.949	109.688	106.318	101.884	110.789	104.797	112.205	113.147	109.51	109.964	101.15	110.776	105.232	105.617	105.751	102.959	106.954	102.011	102.599	109.581	109.885	110.611	106.736
109.497	114.488	107.937	106.418	102.421	107.908	104.335	114.636	105.885	108.998	119.873	101.94	106.341	109.229	103.447	113.48	107.459	106.093	112.281	103.211	111.59	109.563	110.12	111.514	108.092	103.652	119.424	105.903	110.287	106.588	101.722	110.822	104.492	111.712	112.087	108.998	109.54	101.524	109.917	104.896	105.948	105.744	103.357	106.801	102.446	102.176	110.076	109.985	111.117	106.834
110.377	114.727	107.562	106.594	102.769	108.364	103.348	114.782	105.568	108.567	120.136	101.589	107.241	108.55	103.803	113.424	107.566	106.124	112.757	103.451	112.126	111.531	111.884	111.518	109.567	104.381	118.856	106.277	109.905	106.878	101.971	111.364	104.497	112.433	112.348	109.823	109.099	101.306	109.473	105.345	106.363	106.448	103.552	106.197	102.792	102.518	109.966	110.559	110.495	106.959
110.524	115.279	107.842	106.836	103.599	108.124	104.308	114.311	105.569	108.81	121.19	102.558	105.376	109.199	103.196	113.742	108.149	106.285	111.859	103.529	113.185	110.981	111.875	112.063	108.82	104.473	119.399	105.867	111.309	106.713	101.769	112.047	104.514	113.174	114.014	110.056	110.363	101.841	110.052	105.138	105.428	106.607	103.267	107.04	102.522	102.818	110.187	111.429	110.738	106.465
110.983	114.903	107.031	106.309	103.594	109.337	104.577	114.608	106.192	108.415	120.68	102.318	106.448	109.09	104.164	114.123	108.964	105.976	112.962	103.451	113.443	110.792	111.264	111.73	109.826	104.608	119.686	105.346	110.451	106.491	102.255	112.159	104.338	112.27	113.469	110.653	110.26	102.039	108.808	106.104	105.147	106.553	103.724	107.014	103.446	102.859	109.985	109.414	111.772	106.826
110.711	115.821	108.381	107.512	104.561	108.14	104.536	115.049	105.975	109.744	120.964	101.688	106.446	108.89	104.371	114.501	108.701	106.366	111.258	103.309	113.209	110.929	112.26	111.523	109.444	104.766	119.958	105.088	110.498	106.868	101.828	111.525	105.722	113.169	113.884	110.051	111.46	100.908	108.749	105.412	106.299	106.079	103.12	107.219	102.359	103.25	110.296	110.313	111.301	107.795
111.222	115.89	108.244	107.832	104.158	109.462	104.582	114.817	106.508	109.502	120.895	101.455	106.172	108.611	104.356	114.914	108.502	106.622	112.83	103.784	113.964	111.236	111.47	112.139	108.981	105.987	120.413	105.929	109.88	106.647	101.882	111.937	105.236	113.074	114.328	110.206	111.216	101.667	109.717	105.605	105.985	106.913	104.276	107.935	103.431	103.24	110.414	112.33	111.964	108.077
110.487	115.967	107.631	107.973	104.915	108.994	105.245	115.168	106.809	109.833	121.519	101.616	106.892	109.732	104.687	114.795	109.182	106.794	113.03	103.385	112.868	110.032	113.527	112.041	109.293	105.966	120.309	105.767	110.142	107.213	101.679	113.31	105.333	113.322	114.809	109.91	112.169	101.968	110.092	105.896	106.788	106.512	104.232	108.25	103.348	102.719	110.771	111.977	112.681	108.349
111.448	116.062	108.002	107.594	104.144	109.799	104.452	115.253	106.661	109.772	122.471	101.74	107.863	109.068	104.449	114.98	108.19	107.202	113.481	103.405	113.778	111.283	113.135	112.572	109.167	106.659	120.603	105.606	109.899	106.729	101.678	113.044	105.468	113.273	115.263	110.931	111.66	100.872	109.465	105.512	106.733	107.122	104.371	108.145	103.98	103.051	110.721	111.756	111.745	108.56
112.15	115.815	108.448	106.444	104.684	110.107	105.004	115.413	106.529	110.499	120.96	101.545	107.401	109.11	105.091	115.106	109.623	106.991	113.651	103.95	114.713	110.819	113.106	112.295	109.51	106.207	120.792	105.418	110.777	107.037	102.454	112.285	105.541	114.1	114.598	110.155	112.389	101.029	110.164	106.235	107.469	107.79	104.391	108.503	103.869	103.25	110.709	110.741	113.411	108.357
111.781	115.625	108.771	106.634	105.03	110.417	105.631	115.845	106.533	110.695	122.11	102.184	106.901	109.001	105.012	115.129	108.13	107.181	114.288	103.815	114.565	112.902	113.891	112.75	109.702	106.032	121.406	106.222	110.113	107.115	102.214	112.586	105.036	114.093	115.839	111.31	112.477	101.88	109.134	105.912	107.73	107.277	105.587	108.163	103.925	103.56	111.393	110.227	113.014	108.755
112.575	114.594	107.875	106.835	105.318	110.131	105.639	116.407	107.623	110.586	122.788	102.355	106.907	109.754	105.035	115.871	109.021	107.503	115.65	105.367	114.183	112.131	113.747	112.605	109.84	107.774	121.863	106.763	109.609	107.899	102.438	112.679	105.508	113.982	114.662	111.078	113.148	102.124	108.858	106.123	107.224	107.737	104.949	107.744	103.865	103.912	111.173	111.087	113.265	108.743
111.87	115.816	108.541	107.666	105.281	109.973	105.083	116.66	107.731	111.161	122.389	101.892	108.076	110.149	104.825	115.835	108.975	107.407	114.655	105.235	113.785	111.178	114.176	113.233	110.005	107.541	122.339	106.829	109.546	107.299	101.957	112.575	105.76	113.605	115.947	109.894	112.759	102.14	109.545	105.808	107.907	106.832	105.219	107.824	104.593	104.417	111.099	112.508	113.421	108.979
113.931	116.106	109.174	108.492	105.42	110.526	105.502	115.694	107.397	110.438	124.172	102.23	109.265	110.173	105.309	115.762	109.511	107.577	114.743	105.26	115.152	112.796	113.162	112.762	109.529	108.024	121.827	107.416	109.946	106.957	102.957	112.991	106.102	114.787	114.143	110.846	112.5	102.063	108.227	106.795	107.093	106.912	106.254	107.551	104.886	104.001	111.265	111.995	113.674	109.441
113.023	115.383	108.629	108.274	105.211	109.861	105.277	117.041	107.473	110.685	123.421	102.312	108.85	109.659	105.395	116.043	110.091	108.119	116.033	105.843	115.703	111.742	113.904	113.549	109.915	108.974	122.656	106.883	110.568	106.637	101.904	112.41	105.998	114.566	115.989	111.387	113.573	102.55	108.773	106.511	107.51	107.654	105.713	108.091	104.871	104.017	111.168	112.849	112.998	109.524
114.175	116.501	108.464	107.676	106.068	109.768	105.201	116.637	107.873	111.317	122.478	101.878	108.407	109.201	105.45	115.84	109.482	108.406	114.959	105.846	115.292	111.961	114.418	114.146	110.569	108.89	122.362	107.674	110.023	107.5	102.283	112.932	106.433	114.586	115.344	111.294	113.284	102.027	108.897	106.894	107.475	107.143	106.621	108.702	105.062	104.308	111.865	111.815	113.168	109.372
114.05	116.277	108.891	108.473	106.297	109.819	105.646	116.733	107.565	111.613	123.707	102.345	108.766	110.848	105.881	116.071	109.917	108.347	115.068	106.301	115.849	112.301	114.113	114.023	110.827	108.903	122.635	107.642	110.236	107.202	102.243	112.989	106.819	114.994	114.096	111.278	114.002	101.359	108.601	106.916	108.388	107.38	105.82	108.313	106.057	103.67	112.197	112.161	113.695	109.983
113.206	116.936	108.427	108.435	106.467	110.133	105.304	117.222	108.016	111.668	123.583	103.035	108.635	111.133	105.515	116.659	109.807	108.186	115.346	106.308	116.147	111.509	113.467	114.093	110.668	109.676	123.045	107.617	110.356	107.628	102.443	113.767	107.289	115.196	115.267	110.743	114.377	102.214	108.69	107.363	108.661	107.708	105.969	109.14	105.986	104.829	112.629	111.807	114.108	110.187
115.464	118.268	109.282	108.661	106.708	109.741	105.631	117.225	109.303	111.978	124.512	101.884	108.127	110.534	105.337	117.015	110.422	109.09	116.747	107.183	116.379	112.586	115.164	114.484	110.876	109.519	122.785	108.547	110.005	107.781	102.442	114.724	107.218	115.649	114.326	111.573	114.917	101.811	109.034	107.131	109.416	107.426	105.667	108.56	106.015	104.941	112.746	113.476	114.082	110.179
114.953	117.588	109.481	108.574	105.803	110.048	105.382	117.084	109.331	111.863	124.161	102.459	108.969	110.29	105.664	116.767	109.694	109.79	115.773	106.939	115.826	111.794	115.223	114.128	110.376	109.786	123.561	108.292	110.77	107.606	102.411	113.8	106.726	115.167	115.482	111.421	115.409	102.073	108.579	107.876	108.314	107.622	106.841	108.193	106.363	104.606	112.87	112.739	114.449	110.335
115.215	117.855	108.856	108.462	106.812	109.87	106.095	117.609	109.865	111.747	123.694	102.996	109.347	111.423	105.67	116.71	109.968	109.585	116.607	107.4	117.095	112.614	115.139	114.013	110.353	109.619	123.326	108.502	111.357	107.872	102.485	114.28	107.442	116.366	117.53	110.464	114.576	101.797	109.516	106.938	108.918	108.411	106.707	108.548	106.847	105.526	113.069	114.012	115.019	110.254
114.785	118.721	109.251	108.056	106.791	110.54	106.536	117.1	109.986	112.436	124.065	103.058	109.886	111.451	105.814	116.58	109.959	110.012	116.876	107.857	116.451	112.705	114.69	113.896	110.606	109.813	123.964	109.146	110.57	108.778	102.931	113.579	106.8	115.937	116.547	111.68	113.822	102.202	108.211	107.36	109.064	108.767	107.053	108.974	106.852	105.295	113.075	112.888	115.152	111.398
[truncated: 23 more columns]
