# Supplementary material for: A mechano-osmotic feedback couples cell volume to the rate of cell deformation
Source: eLife journal article supplement (doi:10.7554/elife.72381), 2022-04-13
Supplement: supp [file rpe1_A_peg_cfn_yfn.xlsx]

## Sheet: Sheet1
t	c	c_st		y	y_st		ck	ck_st		e	e_st		ey	ey_st
0	22.5648	18.1431		22.2121	19.0577		14.2597	9.53304		18.0316	15.1284		24.9086	21.9521
1	42.7713	27.1275		51.8115	27.0603		30.8848	18.1842		40.0374	19.3068		59.3512	39.3399
2	58.1354	32.8651		77.4433	33.1882		49.034	23.4951		56.9888	31.7226		79.4493	44.6836
3	75.9786	42.7182		114.682	55.8876		66.5208	32.3079		84.5087	40.91		110.716	50.6142
4	95.139	50.3715		143.835	65.2413		78.5444	38.6958		107.261	55.7287		133.691	64.1019
5	116.412	63.871		174.494	74.5438		116.911	49.9114		136.813	61.2128		172.477	65.4058
6	143.242	73.7955		214.628	90.297		123.512	64.4065		158.524	71.9075		165.98	68.9631
7	174.41	89.822		217.875	78.6448		149.374	51.509		179.215	62.6882		218.288	55.8309
8	194.753	107.892		269.245	121.174		146.733	74.1638		181.871	75.6971		202.704	75.1839
9	222.901	110.859		270.363	104.767		153.335	70.1003		222.55	97.8325		271.016	79.8513
10	228.021	122.135		327.044	145.023		184.64	74.4045		214.787	55.4711		222.894	72.3495
11	236.318	121.218		314.69	123.618		173.235	73.3446		232.085	73.9538		310.816	120.256
12	267.51	151.208		380.591	183.409		194.325	86.3556		256.213	99.4586		249.017	77.2877
13	265.037	142.445		343.119	131.711		191.2	60.23		268.716	94.1511		317.358	130.06
14	336.897	165.66		430.205	189.09		220.695	103.375		345.585	148.765		322.088	138.255
15	314.647	163.576		411.88	150.9		214.144	79.1759		259.28	65.2415		235.886	52.6375
16	358.559	184.229		418.931	189.347		252.466	124.303		284.665	74.7621		338.396	104.819
17	357.583	176.591		442.194	157.018		213.691	53.0354		352.222	139.373		310.719	94.8739
18	393.965	184.453		432.794	161.079		271.754	104.833		415.162	107.874		497.655	199.516
19	452.761	203.814		536.901	234.615		217.207	67.7478		511.768	221.435		464.721	206.518
20	402.612	180.507		376.909	131.399		211.549	102.016		344.339	90.4953		316.855	77.953
21	464.958	236.094		480.821	227.69		244.05	95.2402		333.905	92.1899		704.92	375.357
22	442.246	237.663		544.299	246.844		299.633	128.474		295.967	24.9043		499.36	179.468
23	489.709	257.159		586.817	174.62		261.462	139.255		403.013	108.622		494.203	397.362
24	558.206	254.168		528.574	178.306		243.407	94.7506		539.584	211.049		356.516	85.8593
25	457.986	212.22		564.546	190.004		259.495	105.195		395.981	116.06		244.051	75.0893
26	614.415	284.338		582.53	317.583		312.167	140.301		400.767	126.987		666.858	228.297
27	535.186	308.496		700.625	218.78		316.933	183.887		595.297	233.681		493.51	204.276
28	547.266	304.07		668.072	207.919		337.895	242.119		550.96	185.311		608.922	262.857
29	660.015	259.888		745.569	270.408		298.544	130.769					741.149	315.698
30	506.019	181.187		619.357	177.761					433.394	68.3514
31	606.436	253.782		654.095	141.308		321.977	173.092		510.722	61.9355
32	677.442	338.875		974.226	284.353		327.12	148.532					1000.85	182.427
33	669.579	380.049		885.925	239.839		297.649	142.953		608.255	57.5744		749.608	435.361
34	733.594	294.14		717.955	279.894		329.33	212.69		650.524	272.266		524.108	89.6211
35	569.302	163.224		781.503	339.618					501.934	132.69
36	543.36	302.792		693.365	317.999		309.8	156.257		520.356	187.798		596.238	340.832
37	636.644	385.344		861.516	276.176		378.874	212.463		698.246	155.534		655.263	286.132
38	693.907	383.801		851.315	274.737		366.258	216.916		804.8	252.768		814.924	280.478
39	820.453	327.005		914.653	327.757		365.501	184.963					792.15	361.654
40	534.686	207.707		812.756	25.0135
41	730.436	354.763		714.28	74.9549					543.64	40.7564		1032.52	617.537
42	719.739	342.84		947.757	315.631					486.437	87.053
43	735.896	330.799		1027.79	154.033								848.639	412.14
44	817.212	334.871		938.526	312.594		294.251	138.698		775.129	212.304		630.555	148.913
45	642.415	242.486		820.427	222.919		338.02	0		691.954	17.1811		491.118	193.105
46	953.883	501.864		898.77	374.383					832.258	165.678		768.773	455.736
47	777.245	470.988		941.985	296.258					671.048	165.793		832.015	220.736
48	771.31	422.441		1018.89	367.703		343.273	64.3275		851.603	175.798		862.056	389.371
49	882.364	374.186		996.938	302.964		412.255	247.944					962.443	413
50	641.698	248.648		1604.45	310.407					857.87	222.61		872.248	126.004
51	925.734	638.805		957.741	12.1165					541.925	71.0885
52	814.339	372.041		911.428	236.539					567.111	191.143		842.451	474.495
53	1054.77	346.272		1572.16	0
54	870.09	342.51								828.046	48.831		1085.83	349.149
55	621.992	317.042		531.472	0		353.933	168.074		844.288	315.717		685.956	136.611
56	805.368	377.045		901.152	206.182					538.678	167.811
57	940.147	668.991		1077.33	394.342					732.447	298.377		1025.27	479.273
58	855.299	505.967		1088.64	310.454					816.293	130.175		755.623	248.388
59	992.348	500.737		1032.22	439.738		349.305	72.336		808.753	147.48		974.331	272.253
60	994.763	383.084		1131.89	307.1		423.409	199.783					879.521	313.523
