# Supplementary material for: A mechano-osmotic feedback couples cell volume to the rate of cell deformation
Source: eLife journal article supplement (doi:10.7554/elife.72381), 2022-04-13
Supplement: supp [file rpe1_confinement.xlsx]

## Sheet: Sheet1
20181001 1	h (µm)	19.8	10.7	8	5.3
	V (µm3)	1283.07	1083.49	1043.66	959.482
	stdev	447.303	279.777	310.02	295.246
	n	154	229	104	355
20181001 2	h (µm)	19.8	9.4	5.3
	V (µm3)	1267.6	1070.92	800.1
	stdev	402.246	287.682	237.013
	n	117	166	49
20181102 2	h (µm)	19.8	11.2	9.4	5.3	4.6	3.1
	V (µm3)	1124.52	794.875	931.792	936.598	960.757	928.096
	stdev	380.939	254.24	342.414	243.161	221.057	259.127
	n	52	86	91	183	78	152

## Sheet: Sheet2
20181001 1	19.8	1283.07		20	0	1225.06	71.3747	3
20181001 2	19.8	1267.6
20181102 2	19.8	1124.52
20181102 2	11.2	794.875		9.74	1.12357	984.947	109.089
20181001 1	10.7	1083.49
20181001 2	9.4	1070.92
20181102 2	9.4	931.792
20181001 1	8	1043.66
20181001 1	5.3	959.482		4.72	0.854166	917.007	59.8202	5
20181001 2	5.3	800.1
20181102 2	5.3	936.598
20181102 2	4.6	960.757
20181102 2	3.1	928.096
				20	0	1225.06	71.3747	100	5.8262
				9.74	1.12357	984.947	109.089	80.3996	8.90475
				4.72	0.854166	917.007	59.8202	74.8537	4.88302
