# Supplementary material for: A mechano-osmotic feedback couples cell volume to the rate of cell deformation
Source: eLife journal article supplement (doi:10.7554/elife.72381), 2022-04-13
Supplement: supp [file rpe1_V_peg_cfn_yfn.xlsx]

## Sheet: Sheet1
t	peg	peg_st		c	c_st		y	y_st		ck	ck_st		e	e_st		ey	ey_st
0	100	4.11458e-15		100	5.99182e-15		100	5.76733e-15		100	5.0243e-15		100	4.07413e-15		100	4.69369e-15
1	100.038	0.916367		101.054	1.18108		100.525	0.948476		100.805	1.17491		100.599	1.15254		100.454	1.314
2	100.312	1.34974		101.85	2.07963		100.67	1.33253		101.594	1.70737		101.274	1.97231		100.84	1.40575
3	100.245	1.7841		102.302	2.56103		100.796	1.64282		102.257	2.30943		101.816	2.55144		101.017	1.78552
4	100.244	2.02297		102.548	2.84479		100.754	2.10434		102.996	2.93477		102.114	2.97602		101.119	2.12276
5	100.23	2.30678		102.353	3.23555		100.575	2.60885		103.603	3.52109		102.057	3.55235		101.266	2.3834
6	100.346	2.5321		102.224	3.7999		100.323	3.10391		103.914	4.03792		101.907	3.57237		101.517	3.11037
7	100.296	2.77724		101.918	4.22859		99.9853	3.38496		104.084	4.57874		101.7	3.92385		101.546	3.04608
8	100.262	3.02267		101.386	4.37512		99.58	3.69192		103.738	4.8565		101.23	4.23568		101.667	3.31537
9	100.296	3.19953		100.878	4.555		99.2815	3.95879		103.476	5.2732		101.087	4.55474		101.548	3.86868
10	100.344	3.46859		100.631	4.81128		98.9471	4.11256		103.493	5.64116		100.889	4.75565		101.899	4.2939
11	100.245	3.66296		100.199	5.01799		98.6705	4.34525		103.526	5.7606		100.634	4.83037		101.975	4.55325
12	100.315	3.83786		99.9142	5.04796		98.3947	4.54637		103.243	5.80845		100.428	5.14787		102.134	4.69217
13	100.274	4.01559		99.5792	5.14421		98.1479	4.6974		103.068	6.04181		100.142	5.29463		102.165	5.02219
14	100.368	4.19244		99.1657	5.23858		97.8831	4.73088		102.831	5.84763		100.016	5.34148		102.081	5.28394
15	100.254	4.29062		98.7593	5.27396		97.4989	4.96022		102.672	5.96823		99.8429	5.37846		102.378	5.41112
16	100.306	4.38161		98.4744	5.44618		97.2143	4.90952		102.318	6.42459		99.3891	5.40266		102.565	5.52472
17	100.322	4.41416		98.1291	5.834		96.9815	5.0859		102.162	6.4468		99.2827	5.3814		102.399	5.80282
18	100.279	4.53807		97.8316	6.06276		96.7165	5.16681		102.026	6.45009		98.6983	5.38492		102.437	6.08119
19	100.344	4.74549		97.3825	6.34501		96.4435	5.33073		102.353	6.3549		98.5698	5.63774		102.602	5.92006
20	100.253	4.82371		97.2046	6.45291		96.0935	5.53239		102.033	6.10058		98.2422	5.54923		102.583	6.07148
21	100.246	4.93178		96.8565	6.46731		95.8802	5.45627		101.857	5.80758		98.1097	5.51808		102.635	6.05527
22	100.326	4.99901		96.5171	6.58873		95.7357	5.55523		101.726	5.8934		98.108	5.96566		102.811	6.29519
23	100.393	5.16133		96.2641	6.62208		95.6514	5.47049		101.531	5.78345		97.949	5.97946		102.849	6.51959
24	100.459	5.06237		96.0051	6.63089		95.3721	5.4834		101.382	5.61536		97.3864	6.08716		102.938	6.64455
25	100.462	5.18173		95.7693	6.6081		95.1683	5.50272		101.533	5.87623		97.3515	6.14127		102.833	6.62263
26	100.728	5.29347		95.5873	6.52471		95.0746	5.41063		101.358	5.78674		97.3077	5.98517		103.169	6.67584
27	100.68	5.24183		95.4503	6.61321		94.8528	5.75198		101.312	6.00542		97.1208	6.0671		103.646	6.40968
28	100.714	5.22901		95.2448	6.5472		94.6302	5.69558		101.076	5.98055		97.0731	6.43074		103.581	6.52442
29	100.772	5.24871		95.0901	6.54761		94.6205	5.86132		101.174	6.09285		97.0728	6.62238		103.44	6.34941
30	100.872	5.29685		94.8662	6.47377		94.3219	5.86767		100.944	6.29617		97.3385	6.64554		103.646	6.33419
31	100.906	5.27976		94.7515	6.44605		94.2665	5.84157		100.716	6.16109		96.8808	6.48208		103.953	6.43146
32	100.943	5.39523		94.5212	6.38988		94.0778	5.88523		101.353	6.05965		97.1125	6.74734		103.792	6.54886
33	101.08	5.48465		94.4015	6.46059		93.998	6.06234		101.033	6.59679		96.9724	7.23033		103.729	6.65507
34	101.191	5.55764		94.4329	6.28905		93.9921	6.26731		101.16	6.57103		96.9149	7.21818		104.099	6.53395
35	101.284	5.59086		94.2564	6.31247		93.9645	6.22905		101.243	6.71689		96.4349	6.89748		103.786	6.8492
36	101.241	5.65488		94.1359	6.35619		93.6191	6.22856		101.45	6.91764		96.4436	6.93694		104.002	6.87978
37	101.302	5.76285		94.0368	6.25904		93.5659	6.62742		101.205	7.09877		96.2159	6.98209		103.675	6.62029
38	101.486	5.82413		93.7661	6.24323		93.6016	6.77113		100.777	7.39368		96.0986	7.56308		103.698	6.96668
39	101.546	5.8943		93.7305	6.27029		93.5004	7.15752		100.699	7.35682		96.0791	7.53339		103.764	6.77349
40	101.588	5.92914		93.6157	6.23148		93.2423	7.29014		101.464	7.67502		95.9579	7.21813		103.769	7.169
41	101.734	6.03805		93.6088	6.21258		93.2264	7.53319		101.437	8.05111		95.9825	7.25922		103.962	7.12402
42	101.725	6.04803		93.4683	6.20637		93.0976	7.70909		101.257	8.10083		95.9101	7.74732		103.535	7.25984
43	101.772	6.1035		93.3794	6.28659		92.7002	7.70094		101.81	7.88438		96.2084	7.72391		103.714	7.13329
44	101.828	6.02708		93.2149	6.21161		92.6795	7.78082		101.651	7.15692		95.7467	7.69954		103.983	7.58318
45	102.006	6.10582		93.2605	6.10571		92.6532	8.17928		101.612	6.98452		95.4571	7.15609		104.106	7.4487
46	102.039	6.1754		93.0624	5.85702		92.6335	8.38296		102.102	7.10627		95.8749	8.0285
47	102.048	6.13937		92.9788	5.91833		92.5412	8.34442		102.882	7.35234		95.7639	7.87236
48	102.035	6.14795		92.9733	5.96671		92.3056	8.88737		103.458	6.95287		95.561	7.89188
49	102.185	6.20483		92.7633	5.93216		92.6376	9.21603		103.58	7.22823		95.6584	7.92107
50	102.223	6.26889		92.8097	5.95351		92.3762	9.28414		103.661	6.98129		95.9357	8.86519
51	102.238	6.2795		92.8321	5.77323		92.3065	9.39973		103.504	7.10519		96.5791	8.70634
52	102.297	6.28384		92.6097	5.89471		91.5316	9.34229		103.588	7.22332		97.0046	9.07358
53	102.309	6.32873		92.5862	5.95082		92.2873	9.11024		103.766	7.60951
54	102.419	6.29037		92.5742	6.04186		92.6046	9.40351
55	102.537	6.30575		92.2202	6.14488		92.4952	9.7636
56	102.437	6.40794		91.9542	6.29231		92.1849	9.56332
57	102.497	6.43828		91.9368	6.6773		90.5526	8.35526
58	102.551	6.49828		91.9267	6.94191		90.4747	8.30307
59	102.464	6.52497		91.6276	6.85388		90.7172	6.87948
60	102.981	6.82157		90.8753	7.68789		89.4521	6.02316
