# Supplementary material for: A mechano-osmotic feedback couples cell volume to the rate of cell deformation
Source: eLife journal article supplement (doi:10.7554/elife.72381), 2022-04-13
Supplement: supp [file single_cells_examples.xlsx]

## Sheet: Sheet1
t (min)	hypoosmotic	hyperosmotic	control
0	2508.15	2376.1	2571.77
0.5	2518.46	2359.28	2588.13
1	2532.06	2370.77	2613.75
1.5	2537.07	2389.84	2643.27
2	2547.23	2372.73	2663.07
2.5	2566.19	2378.07	2652.37
3	2559.36	2369.85	2678.12
3.5	2566.66	2397.1	2658.85
4	2579.33	2373.41	2667.06
4.5	2586.88	2397.29	2671.59
5	3781.22	1387.26	2712.46
5.5	3206.08	1390.92	2692.96
6	2672.75	1439.03	2707.01
6.5	2357.61	1471.13	2715.7
7	2318.68	1514.75	2713.57
7.5	2335.55	1525.88	2715.08
8	2345.65	1566.78	2725.22
8.5	2375.83	1597.15	2739.78
9	2391.22	1633.41	2741.86
9.5	2387.34	1646.25	2739.04
10	2399.77	1665.96	2753.83
			2766.08
			2767.85
			2763.31
			2778.43
			2778.91
			2755.89
			2765.34
			2753.13
			2762.29
