# Supplementary material for: A mechano-osmotic feedback couples cell volume to the rate of cell deformation
Source: eLife journal article supplement (doi:10.7554/elife.72381), 2022-04-13
Supplement: supp [file starvation.xlsx]

## Sheet: control 20200310
0	1419.78	1541.09	1909.28	2177.69	1860.64	1721.65	1509.96	1741.96	1661.02	1590.09	1786.03	1508.84	1645.13	1947.34	1997.39		1933.08	1284.34	1443.76	1672.67	2376.37	1440.79	3421.11	1501.23	1224.44	1576.39	2532.17	2076.21	1673.45	2199.28		1630.72	2407.03	1494.36	1677.21	3324.59	2987.51	2249.84				2693.06	2038.49	2215.67	2002.84	1595.04	2685.18	2092.62	1824.41
1	1457.52	1535.78	1904.14	2133.65	1844.25	1710.77	1522.92	1752.45	1649.6	1589.07	1775.17	1505.37	1652.07	1892.62	1989.24		1913.99	1272.3	1443.34	1666.81	2358.35	1423.28	3379.05	1508.61	1209.99	1576.97	2540.81	2061.13	1668.02	2198.74		1618.67	2394.65	1480.07	1637.16	3278.99	2957.83	2249.19				2693.67	2017.06	2208.51	1980.92	1576.24	2672.55	2080.12	1839.97
2	1474.49	1537.93	1899.41	2125.26	1812.52	1724.44	1531.05	1733.34	1643.82	1592.31	1757.42	1483.82	1654.13	1822.68	1976.37		1920.5	1271.42	1432.22	1676.51	2389.66	1437.45	3365.75	1505.81	1217.53	1589.25	2554.79	2088.73	1660.75	2217.54		1619.46	2407.02	1453.58	1634.93	3287.69	2931.93	2235.73				2685.31	2028.36	2179.9	1962.52	1569.92	2684.07	2066.43	1840.32
3	1496.05	1546.15	1889.77	2100.16	1795.02	1728.64	1536.64	1734.3	1645.31	1593.15	1761.28	1475.64	1655.32	1780.91	1958.61		1918.12	1262.5	1416.72	1667.66	2376.08	1431.75	3351.02	1488.23	1229.61	1602.95	2585.62	2107.59	1658.74	2221.71		1609.37	2405.2	1459.23	1607.09	3270.54	2943.74	2231.83				2689.25	2022.42	2159.95	1919.8	1567.67	2677.92	2062.41	1854.96
4	1515.79	1570.69	1875.95	2077.73	1778.12	1733.7	1533.46	1731.07	1641.18	1597.05	1756.23	1471.99	1659.03	1759.17	1940.78		1897.37	1262.56	1420.68	1661.6	2383.81	1429.16	3322.49	1475.28	1214.64	1613.02	2599.47	2134.74	1654.79	2211.01		1613.79	2414.61	1442.26	1632.37	3256.69	2941.98	2235.51				2729.52	2036.28	2155.66	1880.36	1567.71	2676.43	2054.94	1856.06
5	1527.25	1551.94	1863.28	2076.52	1767.33	1733.48	1538.74	1712.63	1646.49	1606.21	1770.73	1471.65	1655.89	1750.07	1940.16		1891.72	1252.32	1417.1	1661.43	2376.17	1436.4	3307.84	1463.68	1223.63	1612.04	2614.02	2156.87	1637.91	2210.15		1613.38	2413.18	1440.78	1627.56	3242.22	2936.11	2240.14				2725.26	2043.41	2140.29	1855.29	1574.99	2679.46	2028.8	1848.05
6	1528.97	1569.35	1827.99	2048.92	1745.1	1729.23	1547.06	1702.98	1633.24	1622.94	1758.27	1463.04	1640.89	1723.27	1927.91		1866.78	1247.74	1403.87	1653.35	2365.41	1428.86	3280.87	1448.14	1230.35	1617.65	2632.68	2161.9	1627.6	2196.37		1602.61	2413.1	1425.74	1622.77	3209.86	2916.73	2220.45				2717.04	2048.14	2123.09	1828.41	1575.7	2683.85	2026.59	1853.83
7	1502.4	1566.47	1809.65	2028.8	1719.35	1727.37	1549.5	1683.96	1633.52	1602.73	1760.77	1471.8	1633.82	1705.89	1915.85		1863.05	1234.16	1391.68	1631.55	2353.05	1416.45	3259.74	1422.08	1232.64	1606.48	2638.17	2167.99	1614.12	2191.56		1593.78	2405.22	1414.9	1609.17	3165.32	2912.03	2242.58				2711.94	2058.61	2095.5	1824.54	1590.36	2675.95	2020.04	1848.6
8	1493.24	1607.14	1782.62	2022.68	1716.43	1728.22	1544.18	1671.09	1621.94	1605.28	1778.44	1466.62	1627.45	1688.93	1902.61		1841.18	1228.71	1402.14	1635.28	2336.17	1416.18	3247.51	1401.59	1235.84	1585.71	2645.69	2188.99	1608.53	2196		1600.72	2409.77	1417.93	1597.17	3132.87	2897.28	2224.76				2699.54	2072.52	2095.73	1801.36	1592.68	2671.61	1995.71	1850.73
9	1487.86	1570.38	1767.2	2010.28	1702	1717.04	1550.08	1652.32	1620.11	1607.43	1777.64	1466.72	1616.06	1664.09	1879.78		1826.89	1218.47	1396.16	1633.38	2329.99	1410.02	3241.18	1373.45	1239.75	1569.18	2646.59	2201.78	1591.98	2178.93		1579.75	2395.99	1426.49	1548.99	3073.39	2870.77	2240.14				2678.13	2075.32	2079.91	1804.15	1602.45	2661.54	1975.89	1850.31
10	1482.69	1567.01	1768.11	2004.88	1685.52	1720.86	1557.11	1630.56	1606.55	1603.29	1777.11	1468.05	1605.9	1659.12	1896.96		1805.95	1230.63	1401.15	1619.58	2323.62	1411.06	3198.06	1352.32	1242.03	1560.55	2638.62	2218.13	1579.66	2178.25		1578.06	2398.17	1417.8	1568.55	3073.95	2847.73	2217.17				2677.14	2084.68	2053.17	1794.26	1606.45	2641.95	1952.94	1834.43
11	1462.47	1568.09	1765.19	1985.19	1663.04	1720.56	1556.8	1632.68	1605.83	1609.08	1759.91	1467.49	1595.17	1638.74	1911.14		1790.9	1219	1404.03	1616.94	2318.1	1413.11	3168.4	1339.58	1246.81	1558.69	2647.03	2222.09	1561.19	2159.1		1585.42	2387.75	1400.76	1555.63	3063.26	2831.35	2216.45				2660.68	2086.36	2033.3	1778.19	1603.5	2636.51	1943.18	1831.27
12	1463.18	1579.86	1765.35	1972.65	1645.36	1705.64	1568.45	1626.84	1583.44	1602.49	1751.26	1462.86	1592.32	1633.02	1885		1779.45	1211.47	1404.66	1604.11	2305.99	1401.47	3122.07	1321.25	1252.35	1549.05	2634.86	2237.4	1540.95	2162.38		1574.78	2388.92	1400.86	1534.63	3062.51	2820.84	2204.91				2649.63	2085.53	2030.35	1789.35	1601.57	2615.01	1939.2	1834.53
13	1444.38	1574.81	1770.59	1951.11	1643.96	1704.55	1585.04	1604.96	1570.74	1595.26	1740.28	1451.58	1589.39	1632.6	1875.56		1762.14	1206.18	1414.48	1613.61	2289.99	1397.74	3109.48	1330.41	1264.75	1536.18	2630.04	2246.13	1531.79	2152.53		1573.37	2411.59	1396.93	1518.98	3052.25	2792.13	2205.05				2641.8	2088.26	2019.98	1785.39	1602.26	2605.03	1917.82	1828.57
14	1443.56	1562.55	1776.51	1939.77	1623.86	1704.98	1585.03	1593.86	1569.12	1594.29	1733.55	1448.24	1571.17	1633.67	1867.67		1745.87	1197.51	1415.39	1624.41	2284.38	1390.86	3085.83	1318.72	1255.64	1534.29	2616.33	2241.94	1533.95	2140.71		1559.69	2408.67	1398.38	1520.18	3056.03	2786.16	2201.64				2635.66	2077.28	2013.5	1798.58	1608.79	2591.17	1917.16	1820.78
15	1450.66	1565.34	1779.87	1946.69	1610.55	1760.21	1584.63	1579.85	1556.43	1582.63	1739.38	1441.09	1564.54	1629.32	1850.44		1741.81	1193.62	1418.26	1621.96	2269.87	1405.28	3054.76	1315.67	1256.37	1533.62	2607.27	2266.6	1539.05	2148.77		1557.61	2376.55	1393.67	1506.27	3069.67	2779.87	2198.02				2598.02	2073.55	2014.23	1804.54	1623.9	2573.46	1899.89	1817.58
16	1425.77	1557.11	1792.05	1915.83	1598.24	1692.46	1592.48	1578.1	1550.28	1581.38	1728.39	1439	1559.1	1617.41	1846.08		1734.78	1184.14	1430.1	1619.95	2255.7	1399.17	3034.27	1316.15	1263.12	1533.18	2596.79	2265.87	1526.57	2130.84		1542.6	2367.86	1389.79	1509.34	3064.76	2768.64	2198.03				2603.17	2057.24	2008.3	1783.3	1619.54	2569.34	1900.57	1810.98
17	1427.85	1546.39	1793.51	1892.32	1586.76	1693.82	1607.87	1573.7	1531.52	1576.67	1726.56	1431.65	1562.84	1607.27	1840.47		1728.52	1193.42	1428.19	1623.75	2255.88	1401.52	3023.06	1315.07	1281.72	1534.82	2582.39	2269.74	1517.14	2145.3		1545.28	2370.13	1395.48	1510.27	3054.91	2761.75	2192.62				2583.48	2056.4	2006.8	1789.01	1601.38	2552.49	1894.14	1808.97
18	1420.72	1538.11	1795.96	1885.49	1588.42	1695.3	1624.71	1571.6	1537.75	1566	1721.34	1430.37	1559.14	1599.27	1833.61		1738.04	1182.56	1436.88	1624	2250.99	1396.03	3014.18	1324.09	1265.52	1530.96	2577.41	2275.33	1518.53	2145.62		1539.66	2377.27	1383.21	1502.5	3076.5	2762.45	2193.98				2564.55	2047.03	2000.87	1792.31	1604.23	2535.93	1892.98	1814.65
19	1411.66	1528.6	1799.39	1870.95	1581.65	1692.31	1625.91	1571.77	1523.38	1552.15	1715.84	1427.19	1561.83	1607.5	1815.77		1730.8	1186.8	1451.97	1620.37	2240.8	1405.19	2999.23	1334.3	1273.4	1535.97	2557.62	2281.65	1527.1	2134.87		1535.14	2356.04	1382.46	1519.24	3089.8	2739.34	2194.72				2557.44	2048.5	2004.19	1788.69	1603.11	2538.49	1896.62	1810.68
	1407.88	1523.64	1795.16	1882.03	1572.76	1698.58	1624.38	1571.79	1520.49	1547.05	1715.67	1421.3	1545.8	1602.73	1807.05		1732.54	1179.93	1442.45	1617.12	2233.28	1393.56	2997.88	1327.82	1282.27	1547.78	2541.97	2280.31	1521.81	2156.93		1530.2	2377	1383.74	1522.64	3076.16	2743.4	2184.39				2549.84	2032.64	1993.56	1792.97	1593.1	2510.94	1888.58	1811.97
	1389.61	1523.84	1815.23	1872.1	1577.47	1707.23	1619.66	1580.56	1516.36	1556.15	1701.41	1418.02	1553.6	1626.78	1830.22		1739.35	1185.08	1438.91	1610.79	2232.14	1397.66	2989.6	1329.97	1286.38	1535.17	2542.51	2282.09	1521.24	2166.29		1522.65	2374.26	1383.24	1527.78	3076.63	2731.08	2187.26				2536.32	2023.73	1990.95	1788.97	1599.91	2501.24	1883.87	1809.36
	1390.25	1520.11	1804.81	1875.1	1581	1710.22	1627.44	1582.73	1519.96	1552.06	1694.48	1405.67	1538.6	1636.14	1829.79		1734.35	1173.7	1445.62	1622.74	2224.03	1388.8	2996.82	1334.54	1287.7	1538.95	2540.47	2282.88	1525.59	2161.28		1504.9	2380.13	1371.58	1534.35	3079.4	2717.54	2189.89				2513.5	2027.47	1997.41	1797.9	1596.15	2502.87	1885.79	1806.76
	1373.38	1515.01	1813.34	1875.58	1577.14	1716.03	1630.55	1588.8	1507.22	1552.21	1699.87	1402.78	1545.89	1646.06	1818.53		1735.47	1184.85	1447.8	1613.77	2241.36	1387.86	2992.63	1328.41	1280.96	1542.45	2537.62	2265.56	1518.07	2162.22		1506.42	2379.12	1361.65	1540.09	3072.47	2723.09	2179.68				2517.15	2016.47	1987.73	1792.08	1584.61	2487.51	1885.65	1794.43
	1376.32	1513.1	1812.05	1876.08	1587.04	1714.84	1625.57	1583.22	1507.33	1559.32	1688.17	1404.28	1537.59	1652.01	1881.82		1741.77	1183.91	1451.93	1619.69	2224.96	1396.56	2996.07	1340.18	1281.53	1538.29	2544.32	2268.22	1533.51	2175.1		1501.98	2383.38	1365.46	1527.33	3082.9	2706.12	2189.27				2522.18	2009.79	1990.03	1796.03	1580.47	2489.35	1884.07	1798.57
	1363.68	1505.62	1810.13	1878.03	1580.06	1721.13	1623.91	1594.65	1498.86	1566	1693.37	1395.29	1539.73	1661.03	1821.75		1733.14	1190.43	1445.28	1621.75	2222.58	1400.54	3012.4	1347.54	1278.81	1534.91	2543.99	2269.57	1527.92	2173.54		1506.35	2386.98	1360.98	1538.02	3071.68	2700.55	2195.31				2514.39	2009.3	1985.81	1796.74	1587.04	2478.16	1891.45	1803.93
	1353.02	1510.76	1814.32	1878.83	1581.12	1725.23	1620.08	1596.51	1495.78	1564.11	1696.72	1388.31	1544.41	1660.25	1824.34		1752.32	1191.27	1438.61	1620.66	2234.05	1395.85	2993.6	1344.77	1292.68	1532.04	2539.32	2277.56	1522.42	2182.04		1512.41	2399.96	1360.44	1546.32	3084.55	2689.15	2182.74				2520.6	1998.86	1977.69	1783.31	1588.63	2484.13	1898.61	1789.04
	1358.94	1506.68	1814.07	1899.24	1591.96	1733.76	1614.4	1607.05	1505.46	1574.37	1693.16	1386.48	1531.41	1657.14	1816.53		1741.79	1188.05	1430.85	1630.47	2235.82	1399.98	3017.76	1341.1	1289.01	1531.72	2553.53	2278.77	1526.26	2182.88		1522.3	2407.47	1356.44	1553.22	3095.85	2702.56	2195.56				2532.2	2001.01	1974.99	1792.02	1580.87	2468.91	1885.25	1787.03
	1360.42	1503.8	1806.97	1902.43	1598.34	1733.9	1601.81	1604.51	1503.38	1586.63	1713.24	1385.46	1534.15	1656.39	1821.65		1749	1200.64	1427.85	1626.39	2240.29	1403.04	2992.53	1351.58	1291.87	1528.67	2547.49	2290.64	1536.76	2176.96		1501.38	2426.61	1364.66	1539.88	3096.49	2714.91	2195.86				2532.47	1980.96	1977.01	1787.77	1594.56	2476.03	1883.07	1791.47
	1370.23	1508.31	1800.76	1907.14	1596.03	1747.71	1610.65	1611.1	1492.09	1592.85	1707.51	1380.47	1537.43	1667.82	1808.38		1741.53	1193.76	1404.88	1643.82	2248.24	1405.95	3019.84	1331.59	1277.81	1530.36	2538.9	2295.27	1533.85	2190.94		1502.79	2429.28	1359.29	1550.86	3077.96	2714.85	2209.21				2538.31	1983.92	1973.47	1784.77	1584.92	2469.99	1888.6	1789.21
	1360.3	1521.12	1812.02	1893.01	1598.99	1746.66	1602.13	1616.65	1495.25	1592.63	1718.05	1379.26	1533.98	1678.98	1817.86		1761.23	1212.31	1419.83	1636.09	2240.46	1398.68	3019.26	1343.91	1279.8	1522.69	2533.91	2302.98	1536.51	2167.9		1506.51	2437.71	1365.05	1538.63	3069.87	2710.32	2211.47				2537.79	1984.06	1979.35	1772.82	1590.25	2473.33	1884.07	1787.91
	1362.57	1520.78	1811.87	1902.55	1599.24	1751.99	1604.4	1615.9	1496.6	1595.25	1723.3	1376.33	1537.71	1678.53	1814.06		1759.04	1201.18	1408.88	1640.47	2250.29	1403.3	3019.07	1347.63	1285	1522.41	2534.29	2315.13	1532.23	2173.03		1514.88	2455.3	1356.6	1551.29	3076.2	2718.97	2208.14				2529.48	1988.99	1984.43	1784.64	1578.2	2459.87	1890.43	1782.85
	1360.42	1525.46	1812.24	1897.58	1607.33	1759.78	1619.76	1620.34	1479.57	1589.95	1722.2	1375.45	1537.43	1687.81	1811.14		1751.9	1212.23	1400.12	1645.25	2254.82	1391.77	3034.37	1346.28	1284.96	1525.49	2534.44	2319.3	1532.43	2176.61		1511.17	2454.43	1358.73	1549.24	3067.34	2711.34	2208.7				2545.71	1984.43	1976.65	1777.05	1575.38	2450.53	1883.49	1778.21
	1361.56	1534.64	1817.9	1902.85	1605.71	1751.43	1585.69	1616.71	1485.61	1600.05	1717.95	1372.31	1543.75	1693.92	1815.32		1766.81	1214.1	1385.39	1650.86	2267.85	1394.9	3032.87	1336.75	1286.06	1524.16	2531.01	2328.51	1538.54	2177.05		1496.75	2445.59	1362.42	1542.79	3077.93	2708.88	2223.95				2531.83	1986.88	1978.99	1766.97	1583.58	2461.61	1885.86	1790.66
	1363.51	1534.46	1816.29	1908.14	1605.97	1763.74	1592.89	1625.87	1492.01	1606.5	1716.4	1369.39	1543.08	1688.76	1823.66		1763.9	1219.56	1377.37	1659.42	2266.11	1400.12	3046.94	1335.91	1278.55	1529.78	2544.9	2332.97	1548.43	2176.18		1503.55	2449.26	1372.79	1540.75	3091.23	2733.34	2220.04				2541.55	1965.51	1983.63	1772.88	1574.77	2450.9	1901.52	1780.97
	1358.69	1531.79	1826.58	1914.72	1606.15	1768.33	1593.66	1637.28	1504.39	1608.95	1726.46	1373.86	1546.1	1672.74	1833.08		1777.33	1216.68	1362.94	1651.06	2272.56	1391.66	3045.06	1335.58	1273.09	1529.9	2539.52	2346.66	1538.84	2174.08		1509.85	2440.34	1369.63	1536.27	3062.44	2729.41	2230.89				2539.26	1976.9	1983.71	1780.25	1574.1	2449.87	1895.83	1792.22
	1363.56	1530.99	1830.88	1906.61	1620.66	1769.99	1593.59	1633.59	1496.76	1609.13	1729.32	1384.45	1542.99	1664.7	1842.67		1777.56	1229.23	1357.86	1653.99	2275.93	1395.55	3053.01	1336.92	1283.43	1529.78	2548.94	2343.08	1555.68	2178.08		1505.93	2436.27	1361.81	1530.95	3069.26	2721.19	2238.27				2545.4	1978.96	1984.57	1790.53	1568.82	2451.39	1896.89	1781.26
	1371.51	1542.68	1829.52	1897.42	1614.43	1780.27	1583.43	1639.3	1490.49	1613.82	1721.1	1376.87	1535	1652.5	1826.57		1766.41	1221.28	1362.38	1662.33	2274.8	1399.59	3059.24	1340.65	1270.31	1537.35	2553.03	2346.43	1557.31	2179.48		1505.3	2447.08	1363.55	1512.87	3076.16	2743.87	2245.88				2551.42	1984.3	1994.55	1788.81	1567.3	2453.02	1889.56	1778.47
	1369.68	1540.92	1825.36	1891.42	1628.56	1783.09	1591.89	1642.75	1502.47	1626.09	1743.37	1377.31	1537.87	1668.08	1845.25		1777.95	1228.99	1351.86	1662.82	2285.49	1399.25	3059.79	1337.84	1275.77	1523.45	2550.23	2365.11	1549.04	2179.51		1522.01	2465.75	1363.56	1538.7	3064.81	2725.11	2229.99				2551.16	1973.9	1987.38	1780.82	1565.89	2444.02	1891.37	1789.56
	1368.76	1551.75	1835.28	1908.78	1632.07	1784.86	1590.42	1639.48	1503.59	1620.78	1740.4	1371.36	1538.76	1683.5	1849.73		1777.55	1237.56	1348.85	1660	2288.54	1397.39	3056.15	1345.3	1271.84	1523.69	2544.93	2371.78	1556.21	2183.24		1501.87	2450.74	1364.04	1512.99	3059.19	2731.64	2240.55				2563.37	1983.08	1989.08	1782.53	1561.64	2434.1	1899.89	1777.26
	1372.52	1548.94	1835.43	1894.79	1642.26	1792.88	1590.43	1661.95	1503.19	1626.19	1754.5	1370.89	1534.36	1689.3	1841.32		1768.48	1231.35	1349.34	1672.23	2294.79	1399.39	3060.12	1348.93	1257.3	1530.85	2549.57	2381.71	1559.54	2177.89		1526.09	2474.07	1365.47	1543.31	3092.04	2752.01	2255.4				2568.37	1976.61	1997.9	1773.12	1564.74	2440.27	1895.19	1790.18
	1376.14	1554.89	1843.84	1903.5	1639.52	1792.41	1590.38	1653.03	1500.67	1620.12	1748.9	1370.27	1542.85	1697.16	1846.52		1775.83	1238.45	1354.64	1665.07	2294.63	1403.27	3061.5	1339.67	1256.38	1534.09	2544.07	2383.31	1557.1	2188.01		1521.02	2465.71	1365.41	1534.69	3092.77	2753.27	2248.84				2576.74	1971.36	2005.64	1779.23	1563.1	2437.76	1895.92	1798.68
	1366.04	1561.96	1840.26	1900.33	1642.64	1793.4	1599.52	1652.46	1502.19	1626.17	1743.89	1367.78	1537.47	1693.19	1849.1																	1529.93	2464.06	1362.74	1570.05	3095.2	2727.79	2228.51				2575.29	1974.84	1987.31	1763.59	1567.67	2451.27	1894.75	1807.42
	1366.48	1561.99	1841.92	1891.25	1649.57	1794.51	1598.15	1670.26	1497.32	1615.39	1750.74	1373.06	1545.6	1693.09	1859.52		1773.07	1252.77	1380.35	1662.25	2292.49	1405.14	3082.07	1339.93	1240.08	1530.37	2547.25	2394.27	1566.78	2190.63		1531.95	2455.43	1366.75	1557.51	3114.05	2740.68	2235.63				2597.35	1981.77	1985.93	1775.13	1555.99	2449.41	1890.52	1816.33
	1378.31	1557.79	1828.46	1885.36	1653.99	1791.03	1598.17	1669.41	1507	1618.6	1767.3	1375.25	1547.05	1702.29	1863.2		1778.82	1251.39	1373.07	1669.86	2295.28	1416.94	3090.26	1344.96	1227.33	1537.82	2550.8	2399.67	1568.52	2186.77		1537.86	2453.67	1366.08	1562.94	3117.29	2757.42	2240.54				2601	1962.95	1989.2	1771.88	1553.86	2440.34	1893.19	1809.5
	1362.55	1571.68	1848.55	1889.4	1657.48	1798.18	1591.46	1675.74	1515.48	1595.3	1755.08	1385.83	1549.74	1709.03	1865.06		1782.65	1259.52	1380.88	1663.26	2308.33	1418.32	3117.79	1337.6	1236.87	1526.26	2535.87	2408.35	1574.21	2193.39		1546.36	2459.21	1371.01	1576.13	3112.04	2766.76	2236.16				2590.32	1982.51	1979.45	1767.33	1552.12	2451.24	1904.75	1822.76
	1378.23	1584.73	1855.94	1892.47	1658.86	1789.58	1596.51	1684.33	1500.67	1582.94	1753.84	1376.11	1556.18	1705.86	1857.74		1783.61	1261.62	1386.54	1676.21	2315.99	1418.86	3109.53	1349.96	1232.39	1533.46	2540.08	2416.3	1572.32	2192.78		1546.57	2459.19	1375.82	1570.67	3113.89	2759.79	2234.52				2594.69	1979.21	1969.99	1757.11	1558.49	2462.23	1909.6	1824.81
	1372.58	1578.13	1858.09	1903.06	1661.65	1794.49	1597.77	1685.66	1506.8	1601.84	1746.72	1382.19	1559.83	1705.99	1872.64		1776.86	1245.34	1395.78	1664	2315.66	1427.58	3113.54	1346.81	1233.6	1537.99	2541.25	2418.35	1576.37	2200.14		1557.33	2464.79	1371.87	1574.73	3099.81	2766.62	2232.72				2605.98	1976.35	1965.87	1740.91	1556.59	2459.98	1912.45	1817.96
	1376.65	1585.62	1853.12	1893.46	1660.3	1804.41	1600.84	1699.71	1512.05	1599.27	1742.79	1384.41	1566.38	1687.26	1875.75		1782.29	1255.17	1405.43	1667.72	2321.69	1423.76	3109.43	1347.75	1234.12	1537.28	2543.4	2432.96	1592.67	2204.25		1557.13	2462.06	1370.31	1571.21	3121.38	2758.21	2230.41				2600.76	1979.37	1955.9	1758.01	1555.7	2466.17	1919.91	1830.1
	1380.95	1591.9	1853.08	1914.17	1661.77	1805.54	1598.76	1706.84	1511.34	1588.73	1744.05	1389.66	1564.08	1691.91	1880.44		1777.72	1244.6	1416.78	1660.71	2327.31	1413.16	3112.27	1339.01	1228.7	1535.95	2548.81	2430.05	1591.25	2192.64		1544.73	2467.33	1367.65	1547.69	3172.22	2779.71	2266.35				2612.41	1979.84	1948.06	1758.59	1558.21	2457.61	1911.52	1837.46
	1385.95	1580.18	1872.22	1923.63	1656.15	1804.38	1609.03	1707.54	1520.84	1598.72	1746.21	1390.61	1569.08	1685.93	1878.02		1791.58	1256.72	1418.07	1661.19	2337.1	1425.68	3120.87	1350.7	1235.41	1527.59	2550.21	2433.63	1592.83	2194.84		1564.28	2453.4	1364.38	1589.54	3145.56	2763.03	2231.68				2618.65	1985.82	1937.27	1776.13	1559.31	2467.07	1919.93	1841.85
	1388.68	1589.25	1874.26	1910.96	1664.77	1810.11	1601.11	1704.04	1509.01	1593.79	1748.74	1396.91	1575.94	1686.06	1890.76		1795.81	1255.54	1420.59	1666.26	2343.39	1432.89	3126.73	1348.49	1236.92	1523	2543.18	2448.98	1603.89	2192.94		1580.59	2451.23	1370.14	1568.64	3151.75	2771.3	2238.02				2634.33	1986.48	1935.45	1770.97	1556.46	2460.15	1905.7	1845.31
	1382.68	1609.18	1872.05	1920.94	1670.39	1813	1599.55	1722.78	1518.55	1586.23	1737.92	1405.15	1575.15	1691.7	1886.28		1793.37	1259.71	1424.41	1670.12	2335.9	1433.61	3139.06	1356.02	1233.32	1518.77	2562.24	2437.66	1598.67	2189.78		1574.59	2447.4	1380.23	1579.9	3129.09	2765.15	2226.21				2647.23	1995.47	1911.97	1759.03	1550.53	2468.36	1909.61	1853.56
	1378.28	1614.05	1878.49	1927.31	1676.1	1815.75	1603.01	1724.53	1517.45	1588.07	1738.4	1410.89	1580.85	1700.61	1884.72		1803.08	1277.11	1416.5	1666.19	2350.45	1425.92	3147.18	1350.2	1229.02	1529.78	2549.8	2445.7	1610.67	2199.26		1564.59	2461.95	1381.26	1580.69	3152.38	2772.64	2221.78				2648.5	1998.6	1911.93	1757.88	1554.59	2466.21	1923.13	1871.89
	1390.71	1611.05	1885.92	1924.93	1681.18	1827.59	1604.38	1734.81	1502.99	1596.88	1737.43	1399.23	1570.97	1713.4	1889.4		1793.07	1260.22	1418.43	1673.76	2350.03	1433.79	3147.5	1348.1	1235.82	1530.67	2560.69	2436.15	1604.47	2196.8		1572.98	2452.29	1390.21	1573.97	3132.88	2784.31	2231.19				2654.62	2031.18	1903.61	1755.9	1544.73	2472.55	1917.8	1876.72
	1395.71	1602.46	1893.15	1921.66	1674.71	1819.49	1617.18	1744.86	1513.93	1598.69	1734.86	1411.14	1572.01	1719.31	1893.99		1799.88	1268.83	1428.96	1668.52	2346.11	1428.12	3142.29	1360.87	1224.97	1524.41	2564.75	2436.65	1612.41	2198.13		1575.98	2458.68	1384.89	1567.06	3169.44	2784.68	2228.56				2665.93	2041.64	1891.3	1755.23	1549.22	2463.03	1924.05	1883.05
	1405.41	1603.13	1879.34	1925.35	1680.84	1820.06	1601.41	1753.82	1517.72	1583.39	1726.72	1403.21	1580.59	1725.33	1903.58		1791.31	1276.9	1425.46	1660.49	2360.46	1438.6	3162.96	1356.72	1234.87	1523.91	2566.22	2444.51	1627.56	2202.1		1570.33	2458.03	1395.33	1565.68	3165.44	2788.09	2230.58				2687.08	2064.53	1887	1747.3	1544.57	2470.41	1917.2	1895.19
	1401.69	1598.46	1880.07	1931.6	1675.54	1823.68	1605.94	1762.3	1515.57	1585.22	1732.08	1409.67	1575.37	1719.87	1904.9		1800.63	1280.31	1414.5	1670.23	2364.63	1440.08	3172.29	1343.61	1249.03	1520.67	2576.38	2441.05	1635.59	2186.47		1569.02	2454.82	1396.23	1555.16	3183	2799.17	2219.86				2694.32	2057.57	1882.23	1747.7	1534.12	2476.68	1913.25	1911.07
	1397.06	1601.44	1885.53	1923.24	1689.79	1826.88	1614.4	1770.35	1516.02	1587.18	1733.2	1408.14	1584.72	1721.67	1902.5		1786.11	1267.04	1433.04	1677.76	2366.22	1449.58	3176.57	1340.68	1245.12	1532.26	2567.6	2449.93	1664.12	2193.57		1574.76	2461.96	1399.74	1560.27	3210.43	2791.88	2227.21				2706.12	2018.65	1870.49	1740.07	1540.2	2462.37	1910.56	1920.82
	1409.34	1607.92	1881.34	1922.71	1685.75	1829.18	1620.9	1774.53	1514.77	1584.82	1733.73	1419.71	1589.75	1724.68	1907.85		1802.12	1276.89	1445.27	1674.49	2382.55	1444	3179.72	1362.89	1258.13	1524.45	2564.21	2453.06	1662.16	2191.08		1574.29	2459.89	1398.4	1528.57	3259.13	2825.57	2258.87				2711.84	1998.92	1865.7	1729.26	1539.35	2466.61	1922.38	1932.22
	1396.18	1612.82	1887.51	1931.6	1686.43	1838	1618.38	1781.26	1510.15	1590.41	1724.29	1419.73	1585.07	1737.35	1907.87		1805.1	1286.61	1442.8	1681.12	2382.02	1445.74	3189.92	1361.86	1258.45	1515.96	2569.03	2450.93	1670.37	2192.01		1597.68	2465.4	1401.98	1554.84	3241.26	2787.46	2237.51				2711.43	1973.13	1864.8	1741.73	1531.2	2460.56	1931.97	1939.89
	-3.57029	0.0698724	-6.99115	-14.8065	-15.0252	-1.51553	5.41115	-10.9582	-7.37974	-1.46939	-2.92381	-3.57648	-6.21021	-15.3617	-8.81342	#DIV/0!	-12.3637	-5.44404	0.201114	-3.29821	-8.1775	-2.31249	-22.9984	-12.0319	3.30413	-4.3565	1.30272	11.7188	-9.46889	-4.71087	#DIV/0!	-4.95345	-2.19424	-5.10912	-9.01442	-14.7584	-13.1936	-3.13904	#DIV/0!	#DIV/0!	#DIV/0!	-7.99039	2.0708	-12.0861	-10.1902	2.23771	-8.57377	-11.767	-2.04753
	100	100	100	100	100	100	100	100	100	100	100	100	100	100	100		100	100	100	100	100	100	100	100	100	100	100	100	100	100		100	100	100	100	100	100	100				100	100	100	100	100	100	100	100
	102.658	99.6553	99.7312	97.9778	99.1193	99.3681	100.858	100.602	99.3128	99.9361	99.3916	99.7702	100.422	97.19	99.592		99.0125	99.0627	99.9711	99.6495	99.2418	98.7841	98.7706	100.492	98.8192	100.037	100.341	99.2738	99.6756	99.9754		99.2607	99.486	99.0434	97.6117	98.6284	99.0063	99.971				100.022	98.9487	99.6768	98.9052	98.8218	99.5294	99.4026	100.853
	103.853	99.7951	99.483	97.5923	97.4138	100.162	101.397	99.5048	98.9646	100.14	98.3981	98.3418	100.547	93.5985	98.9476		99.3495	98.9939	99.2008	100.229	100.559	99.768	98.3817	100.305	99.435	100.816	100.893	100.603	99.2413	100.83		99.3093	99.9999	97.2712	97.4792	98.8899	98.1394	99.3728				99.7121	99.5028	98.3853	97.9865	98.4254	99.9584	98.7481	100.872
	105.372	100.328	98.9785	96.4396	96.4736	100.406	101.767	99.5597	99.0545	100.193	98.6143	97.7998	100.619	91.4537	98.0585		99.2262	98.2999	98.1277	99.7006	99.9877	99.3722	97.9512	99.1345	100.422	101.685	102.111	101.511	99.121	101.02		98.6907	99.924	97.6489	95.8189	98.3742	98.5348	99.1997				99.8585	99.2113	97.4852	95.8536	98.2845	99.7294	98.5564	101.675
	106.762	101.92	98.2544	95.4098	95.5651	100.7	101.557	99.3748	98.8058	100.438	98.3314	97.5583	100.845	90.3371	97.166		98.1529	98.3046	98.4017	99.3383	100.313	99.1923	97.1171	98.2715	99.1996	102.324	102.658	102.819	98.885	100.533		98.9614	100.315	96.5134	97.3266	97.9575	98.476	99.3634				101.354	99.8914	97.2915	93.8846	98.2865	99.674	98.1991	101.735
	107.57	100.704	97.5907	95.3541	94.9852	100.687	101.906	98.3161	99.125	101.014	99.1432	97.5354	100.654	89.87	97.135		97.8603	97.507	98.1533	99.3282	99.9917	99.6947	96.689	97.4986	99.9337	102.262	103.232	103.885	97.8763	100.494		98.9367	100.255	96.4142	97.0393	97.5222	98.2793	99.5691				101.196	100.241	96.5979	92.6326	98.743	99.7868	96.9503	101.296
	107.69	101.834	95.7428	94.0869	93.7908	100.44	102.457	97.7618	98.3275	102.066	98.4454	96.9647	99.7421	88.4935	96.5215		96.5701	97.1502	97.2371	98.8451	99.5388	99.172	95.9006	96.4634	100.482	102.617	103.969	104.127	97.2603	99.8674		98.2763	100.252	95.4082	96.7538	96.549	97.6309	98.6938				100.89	100.473	95.8216	91.2906	98.7874	99.9503	96.8443	101.613
	105.819	101.647	94.7817	93.163	92.4064	100.332	102.618	96.6703	98.3443	100.795	98.5856	97.5457	99.312	87.6008	95.918		96.3776	96.0926	96.3927	97.542	99.0185	98.3106	95.283	94.7278	100.669	101.909	104.186	104.421	96.4549	99.649		97.7347	99.925	94.6826	95.943	95.2094	97.4733	99.6773				100.701	100.987	94.5763	91.0974	99.707	99.656	96.5315	101.326
	105.174	104.286	93.366	92.8821	92.2495	100.381	102.267	95.9311	97.6475	100.955	99.5748	97.2018	98.925	86.7303	95.2548		95.2459	95.669	97.1173	97.7647	98.3084	98.2919	94.9255	93.3627	100.931	100.591	104.483	105.432	96.1209	99.8509		98.1601	100.114	94.8853	95.2277	94.2332	96.9795	98.8853				100.241	101.669	94.5868	89.9401	99.8524	99.4947	95.369	101.443
	104.795	101.9	92.5587	92.3123	91.4743	99.7323	102.657	94.854	97.537	101.091	99.5302	97.2089	98.2326	85.4547	94.112		94.5069	94.8714	96.7031	97.651	98.0482	97.8643	94.7407	91.4884	101.25	99.5427	104.518	106.048	95.1317	99.0746		96.874	99.5414	95.4579	92.3552	92.4443	96.0922	99.5688				99.4455	101.806	93.8725	90.0793	100.465	99.1195	94.4218	101.42
	104.431	101.682	92.6062	92.0647	90.5885	99.9541	103.122	93.6045	96.7208	100.83	99.5004	97.2971	97.6153	85.1992	94.9718		93.4237	95.8179	97.0487	96.826	97.7804	97.9362	93.4802	90.0813	101.437	98.9952	104.204	106.836	94.3956	99.0435		96.7705	99.632	94.8765	93.5215	92.4611	95.321	98.5481				99.4085	102.266	92.666	89.5859	100.716	98.3901	93.3248	100.549
	103.007	101.752	92.4534	91.1605	89.3803	99.9364	103.102	93.7264	96.6771	101.194	98.5373	97.2596	96.963	84.153	95.682		92.6452	94.9128	97.2487	96.668	97.5479	98.0788	92.6133	89.2324	101.827	98.8774	104.536	107.027	93.2918	98.1729		97.2222	99.1992	93.7361	92.751	92.1393	94.7727	98.5158				98.7976	102.348	91.7688	88.7831	100.53	98.1876	92.8585	100.376
	103.057	102.515	92.4615	90.5847	88.4301	99.0702	103.873	93.391	95.3296	100.78	98.053	96.953	96.7897	83.8588	94.3732		92.0525	94.3262	97.2917	95.901	97.0381	97.2704	91.259	88.0114	102.279	98.2658	104.055	107.764	92.0825	98.3221		96.5698	99.2477	93.743	91.4987	92.117	94.4209	98.0028				98.387	102.308	91.636	89.3406	100.41	97.3866	92.6686	100.555
	101.733	102.188	92.7363	89.5953	88.3547	99.0067	104.973	92.135	94.565	100.325	97.4384	96.2055	96.6118	83.8377	93.9004		91.157	93.9143	97.9719	96.4692	96.3648	97.0116	90.891	88.6214	103.292	97.4495	103.865	108.184	91.5352	97.8741		96.4832	100.189	93.4801	90.566	91.8082	93.46	98.0093				98.0965	102.441	91.1677	89.143	100.453	97.0149	91.6465	100.228
	101.675	101.393	93.0462	89.0746	87.2745	99.032	104.972	91.4981	94.4672	100.264	97.0617	95.9842	95.5042	83.8925	93.5054		90.3155	93.239	98.0351	97.1148	96.1287	96.5343	90.1995	87.8428	102.548	97.3294	103.324	107.983	91.6639	97.3368		95.6438	100.068	93.5769	90.6375	91.9219	93.2602	97.8579				97.8685	101.903	90.8756	89.8015	100.862	96.499	91.6151	99.8014
	102.175	101.574	93.2224	89.3922	86.5591	102.24	104.945	90.6937	93.7034	99.5308	97.3879	95.5099	95.1013	83.6689	92.643		90.1054	92.9363	98.234	96.9681	95.5185	97.5348	89.2915	87.6393	102.607	97.2867	102.966	109.17	91.9692	97.7033		95.5168	98.7338	93.262	89.8077	92.3323	93.0496	97.6966				96.4709	101.72	90.9082	90.0989	101.809	95.8394	90.7899	99.626
	100.422	101.04	93.8603	87.9754	85.8973	98.3048	105.465	90.593	93.3328	99.4524	96.7725	95.3714	94.7703	83.0574	92.4248		89.7417	92.1981	99.0544	96.8483	94.9222	97.1107	88.6926	87.6716	103.158	97.2589	102.552	109.135	91.2232	96.8879		94.5963	98.3727	93.0022	89.9908	92.1844	92.6736	97.6973				96.6618	100.92	90.6405	89.0385	101.536	95.686	90.8223	99.2643
	100.568	100.344	93.9365	86.8958	85.2803	98.3833	106.484	90.3405	92.2034	99.1562	96.6703	94.8843	94.998	82.5366	92.144		89.4182	92.9209	98.9217	97.0754	94.9297	97.2742	88.365	87.5996	104.678	97.3629	101.983	109.322	90.6599	97.5456		94.7605	98.4669	93.3831	90.0463	91.8882	92.443	97.4568				95.9307	100.878	90.5729	89.3237	100.398	95.0584	90.5152	99.1538
	100.066	99.8065	94.0648	86.582	85.3698	98.4694	107.6	90.2202	92.5786	98.4852	96.3777	94.7994	94.7731	82.1257	91.8004		89.9106	92.0754	99.5234	97.0903	94.7237	96.8932	88.1054	88.2005	103.355	97.1179	101.787	109.591	90.7428	97.5602		94.4161	98.7638	92.5619	89.5829	92.5377	92.4666	97.517				95.228	100.419	90.3053	89.4881	100.577	94.4416	90.4596	99.4652
	99.428	99.1892	94.2447	85.9144	85.006	98.2959	107.679	90.2296	91.7137	97.614	96.0702	94.5888	94.9362	82.5487	90.9074		89.5357	92.4059	100.569	96.8731	94.2949	97.529	87.6685	88.8806	103.998	97.4358	101.005	109.895	91.2548	97.071		94.1389	97.8818	92.5116	90.5813	92.9378	91.6931	97.55				94.9638	100.491	90.4551	89.3077	100.506	94.5372	90.6338	99.2479
	99.1616	98.8674	94.023	86.4232	84.5281	98.66	107.578	90.231	91.5398	97.2935	96.0607	94.1982	93.962	82.3038	90.4706		89.6257	91.8704	99.9098	96.6787	93.9785	96.7219	87.6289	88.4488	104.722	98.1855	100.387	109.83	90.9385	98.0743		93.836	98.7525	92.5976	90.7839	92.5276	91.8288	97.091				94.6816	99.7127	89.9752	89.5214	99.8783	93.5111	90.2496	99.3184
	97.8748	98.8808	95.0742	85.9674	84.781	99.1622	107.265	90.7344	91.291	97.8656	95.2619	93.9809	94.4362	83.5387	91.6306		89.9781	92.2717	99.6642	96.3002	93.9307	97.0059	87.3868	88.5922	105.058	97.3855	100.408	109.916	90.9045	98.4998		93.3725	98.6388	92.5641	91.0902	92.5416	91.4165	97.2186				94.1797	99.2758	89.8576	89.3216	100.305	93.1498	90.0246	99.1752
	97.9198	98.6388	94.5284	86.1052	84.9709	99.336	107.78	90.8589	91.5074	97.6082	94.8737	93.1623	93.524	84.0195	91.609		89.7195	91.3853	100.129	97.0148	93.5892	96.3912	87.5979	88.8968	105.166	97.6252	100.328	109.954	91.1647	98.272		92.2843	98.8825	91.7833	91.4822	92.6248	90.9632	97.3356				93.3324	99.4593	90.1492	89.7674	100.07	93.2104	90.1162	99.0327
	96.7315	98.3078	94.9754	86.1273	84.7636	99.6735	107.987	91.2076	90.7406	97.6178	95.1757	92.971	93.9677	84.5287	91.0456		89.7774	92.2535	100.28	96.4787	94.3185	96.3263	87.4753	88.488	104.616	97.847	100.215	109.12	90.7151	98.3148		92.3774	98.8406	91.1192	91.8245	92.4165	91.149	96.8815				93.468	98.9198	89.7124	89.4766	99.3464	92.6385	90.1092	98.357
	96.9391	98.1837	94.9075	86.1502	85.2956	99.6046	107.656	90.887	90.747	98.0646	94.5208	93.0702	93.4626	84.8344	94.2139		90.1035	92.1808	100.566	96.8325	93.6286	96.9296	87.576	89.2722	104.663	97.5831	100.48	109.248	91.6377	98.9004		92.1053	99.0176	91.3738	91.0638	92.7301	90.5812	97.3077				93.6548	98.5919	89.8161	89.6742	99.0869	92.7069	90.0339	98.5839
	96.0486	97.6983	94.8073	86.2396	84.9202	99.9699	107.546	91.5432	90.2373	98.4848	94.8121	92.4744	93.5929	85.2973	91.2067		89.6572	92.6882	100.105	96.9558	93.5284	97.206	88.0534	89.7623	104.44	97.369	100.467	109.313	91.304	98.8296		92.373	99.1671	91.0741	91.7012	92.3926	90.3945	97.5764				93.3653	98.5677	89.6258	89.7096	99.4984	92.2903	90.3864	98.8778
	95.2974	98.032	95.0267	86.2763	84.9773	100.208	107.293	91.6502	90.052	98.3663	94.9992	92.012	93.8777	85.2572	91.3361		90.6492	92.7536	99.6438	96.8903	94.0109	96.8808	87.5036	89.578	105.573	97.1869	100.282	109.698	90.975	99.2161		92.7446	99.7065	91.0385	92.1957	92.7799	90.0131	97.0176				93.5959	98.0555	89.2592	89.0391	99.5985	92.5127	90.7285	98.0614
	95.7144	97.7673	95.0136	87.2136	85.56	100.703	106.917	92.2551	90.6348	99.0116	94.8003	91.8909	93.0873	85.0977	90.9454		90.1043	92.5028	99.1061	97.4773	94.0856	97.1669	88.2099	89.3338	105.273	97.1663	100.844	109.756	91.2046	99.2543		93.3511	100.019	90.7702	92.6071	93.1198	90.462	97.5873				94.0268	98.1611	89.1375	89.4739	99.1116	91.9458	90.0904	97.9513
	95.8186	97.58	94.6418	87.3599	85.9029	100.711	106.083	92.109	90.5092	99.7822	95.9245	91.8231	93.2539	85.0592	91.2015		90.4773	93.4834	98.8983	97.2331	94.2735	97.3795	87.4725	90.0317	105.507	96.9727	100.605	110.328	91.8323	98.9849		92.0686	100.814	91.3206	91.812	93.1391	90.8753	97.6006				94.0366	97.1775	89.2284	89.2618	99.9702	92.211	89.9863	98.1945
	96.5098	97.8725	94.3163	87.5763	85.7786	101.514	106.669	92.4873	89.8298	100.173	95.6037	91.4923	93.4531	85.646	90.5372		90.0912	92.9477	97.3076	98.275	94.6081	97.5815	88.2707	88.7001	104.358	97.0804	100.266	110.551	91.6582	99.6208		92.1551	100.925	90.9613	92.4664	92.5816	90.8732	98.1942				94.2536	97.3228	89.0686	89.1118	99.3658	91.9861	90.2505	98.0708
	95.8102	98.7042	94.9059	86.9272	85.9376	101.453	106.104	92.8059	90.0202	100.16	96.1938	91.4119	93.2432	86.2189	91.0119		91.1099	94.3913	98.3425	97.8129	94.2808	97.0773	88.2537	89.521	104.521	96.5938	100.069	110.922	91.8171	98.5733		92.3831	101.275	91.3465	91.7373	92.3383	90.7215	98.2944				94.2343	97.3297	89.3341	88.5153	99.7001	92.1105	90.0339	97.9994
	95.9701	98.6822	94.8983	87.3656	85.951	101.762	106.254	92.763	90.1012	100.325	96.4875	91.2183	93.47	86.1963	90.8214		90.9971	93.5255	97.5843	98.0752	94.6946	97.3978	88.2482	89.7687	104.946	96.5758	100.084	111.508	91.5612	98.8065		92.8963	102.005	90.7813	92.492	92.5285	91.0112	98.1466				93.9255	97.5716	89.5634	89.1053	98.9447	91.6092	90.3378	97.7225
	95.8189	98.9856	94.9177	87.1373	86.386	102.215	107.272	93.018	89.0759	99.9911	96.4258	91.1595	93.4532	86.6724	90.6754		90.6277	94.3855	96.9775	98.361	94.8852	96.5975	88.6954	89.6785	104.942	96.7712	100.089	111.709	91.5736	98.9693		92.6685	101.969	90.9238	92.37	92.2623	90.7558	98.1715				94.5285	97.3479	89.2124	88.7261	98.7679	91.2613	90.0063	97.4678
	95.8989	99.5814	95.2142	87.3791	86.2989	101.73	105.015	92.8097	89.4399	100.627	96.1881	90.9513	93.8372	86.9862	90.8847		91.3988	94.5314	95.9573	98.6964	95.4335	96.8147	88.6516	89.044	105.032	96.6868	99.954	112.152	91.9382	98.9892		91.7846	101.602	91.1706	91.9854	92.5806	90.6733	98.8492				94.0131	97.4682	89.3179	88.2231	99.2817	91.6737	90.1196	98.1505
	96.0365	99.57	95.1299	87.6223	86.3128	102.445	105.492	93.3354	89.8253	101.032	96.1012	90.7581	93.7966	86.7215	91.3024		91.2485	94.9561	95.4021	99.2077	95.3601	97.1771	89.0628	88.9878	104.419	97.0435	100.503	112.367	92.5294	98.9493		92.2017	101.754	91.8645	91.8634	92.9809	91.492	98.6757				94.3739	96.42	89.5273	88.518	98.7292	91.2751	90.8676	97.6193
	95.697	99.3963	95.6688	87.9244	86.3228	102.712	105.543	93.9904	90.5701	101.186	96.6644	91.0545	93.9799	85.8989	91.774		91.9431	94.7322	94.4021	98.7078	95.6314	96.5899	89.0081	88.9658	103.973	97.051	100.29	113.027	91.9564	98.8543		92.5875	101.384	91.6534	91.5969	92.1148	91.3606	99.1579				94.2887	96.9786	89.5308	88.8862	98.6875	91.2365	90.5957	98.2359
	96.0404	99.3445	95.8938	87.5519	87.1025	102.808	105.539	93.7787	90.1107	101.197	96.8248	91.7563	93.7909	85.486	92.2541		91.955	95.7092	94.0505	98.8831	95.7734	96.8595	89.2402	89.0553	104.817	97.0435	100.662	112.854	92.9628	99.0358		92.3477	101.215	91.1298	91.2796	92.32	91.0854	99.4857				94.517	97.0794	89.5697	89.3994	98.3565	91.2934	90.6463	97.635
	96.6002	100.103	95.8227	87.1299	86.7674	103.405	104.866	94.1064	89.7336	101.492	96.3646	91.2535	93.3057	84.8595	91.448		91.378	95.0902	94.3634	99.3816	95.7257	97.1403	89.4224	89.3034	103.745	97.5234	100.824	113.015	93.0602	99.0998		92.3087	101.664	91.2464	90.2016	92.5274	91.8448	99.824				94.7403	97.3416	90.0202	89.3134	98.2607	91.3538	90.2961	97.4824
	96.4711	99.9891	95.6049	86.8543	87.5269	103.569	105.426	94.3043	90.4545	102.264	97.6115	91.2829	93.4798	85.6592	92.3834		91.975	95.6903	93.635	99.4114	96.1757	97.1169	89.4385	89.1165	104.192	96.6418	100.713	113.915	92.5659	99.101		93.3336	102.44	91.2467	91.7412	92.1859	91.2167	99.1177				94.7309	96.8314	89.6966	88.9146	98.1727	91.0189	90.3829	98.0903
	96.4064	100.691	96.1242	87.6514	87.7155	103.671	105.328	94.1169	90.5221	101.93	97.445	90.8887	93.5338	86.4511	92.6073		91.9542	96.358	93.4264	99.2423	96.304	96.9874	89.3321	89.6133	103.871	96.6568	100.504	114.236	92.9945	99.2706		92.0984	101.816	91.2791	90.2087	92.0169	91.4353	99.5871				95.1841	97.2817	89.7733	88.9998	97.9064	90.6493	90.7898	97.416
	96.6714	100.509	96.1323	87.0093	88.2635	104.137	105.33	95.4065	90.4978	102.27	98.2348	90.8574	93.2663	86.7492	92.1863		91.4854	95.8745	93.4606	99.9737	96.5669	97.1259	89.4482	89.8554	102.683	97.1113	100.687	114.715	93.1936	99.0275		93.5837	102.785	91.3748	92.0162	93.0052	92.1172	100.247				95.3697	96.9642	90.1714	88.5301	98.1004	90.879	90.5652	98.1238
	96.926	100.896	96.5726	87.4092	88.1161	104.11	105.326	94.8943	90.3463	101.888	97.921	90.8167	93.7827	87.1526	92.4467		91.8655	96.4269	93.8277	99.5458	96.5601	97.3953	89.4886	89.2381	102.608	97.317	100.47	114.792	93.0477	99.4875		93.273	102.438	91.371	91.5021	93.027	92.1592	99.9558				95.6807	96.7069	90.5205	88.835	97.9976	90.7855	90.6002	98.5898
	96.2148	101.354	96.3853	87.2635	88.2838	104.168	105.932	94.8619	90.4376	102.269	97.6406	90.6515	93.4558	86.9489	92.5757																	93.8189	102.369	91.1919	93.6108	93.1001	91.3063	99.052				95.6267	96.8775	89.6931	88.0542	98.2845	91.2887	90.5441	99.069
	96.2461	101.356	96.4719	86.8467	88.656	104.232	105.841	95.8835	90.1449	101.591	98.0238	91.0013	93.9497	86.9437	93.0976		91.7225	97.5418	95.6079	99.377	96.4702	97.5251	90.0897	89.2555	101.277	97.081	100.595	115.319	93.6259	99.6064		93.9432	102.011	91.4603	92.8627	93.6672	91.7378	99.3687				96.446	97.2172	89.6312	88.6307	97.5518	91.2196	90.3421	99.5573
	97.0791	101.083	95.7674	86.5762	88.8936	104.03	105.842	95.8352	90.7276	101.793	98.9513	91.1465	94.0382	87.416	93.282		92.0202	97.4343	95.1038	99.8322	96.5875	98.3442	90.3292	89.5906	100.236	97.5534	100.736	115.579	93.73	99.4313		94.3054	101.938	91.4158	93.1867	93.7645	92.2983	99.5865				96.5816	96.2943	89.7784	88.4682	97.4185	90.8817	90.4698	99.1828
	95.969	101.985	96.8195	86.7619	89.0814	104.445	105.398	96.1985	91.238	100.328	98.2671	91.8476	94.2012	87.7621	93.3749		92.2181	98.0676	95.6447	99.4374	97.1366	98.4402	91.1338	89.1003	101.015	96.8204	100.146	115.998	94.0703	99.7321		94.8264	102.168	91.7454	93.9729	93.6067	92.6108	99.3922				96.1848	97.2537	89.3388	88.2413	97.3091	91.2877	91.0223	99.91
	97.073	102.832	97.2065	86.9027	89.1555	103.945	105.732	96.6916	90.3463	99.5504	98.1977	91.2034	94.593	87.5995	93.0085		92.2678	98.2307	96.037	100.211	97.459	98.4777	90.8925	89.9235	100.649	97.2766	100.312	116.38	93.9572	99.7042		94.8399	102.167	92.0675	93.6476	93.6624	92.3776	99.3193				96.347	97.0919	88.9116	87.7308	97.709	91.697	91.254	100.022
	96.6753	102.403	97.3192	87.389	89.3054	104.231	105.815	96.768	90.7152	100.739	97.7989	91.6061	94.815	87.6062	93.7545		91.9188	96.9635	96.6767	99.4815	97.4454	99.083	91.0096	89.7139	100.748	97.5639	100.359	116.479	94.199	100.039		95.4994	102.4	91.8031	93.8896	93.2388	92.6061	99.2389				96.7665	96.9513	88.7258	86.9217	97.5898	91.6131	91.3901	99.6468
	96.9621	102.889	97.0589	86.948	89.2328	104.807	106.019	97.5743	91.0316	100.577	97.5786	91.7538	95.2128	86.6442	93.9103		92.1994	97.7291	97.3453	99.704	97.6991	98.818	90.8894	89.7764	100.791	97.5195	100.443	117.183	95.1731	100.226		95.4871	102.286	91.6984	93.6795	93.8877	92.3247	99.1364				96.5725	97.0998	88.2757	87.7758	97.5339	91.8436	91.7468	100.312
	97.2652	103.297	97.0567	87.8989	89.3119	104.873	105.881	97.9835	90.9888	99.9144	97.6493	92.1017	95.0731	86.8832	94.1448		91.9634	96.9056	98.1317	99.2853	97.9355	98.0823	90.9724	89.1943	100.347	97.4346	100.657	117.043	95.0884	99.6979		94.7266	102.505	91.5207	92.2777	95.4168	93.0444	100.734				97.0052	97.1227	87.9219	87.8046	97.6912	91.5248	91.3456	100.716
	97.6167	102.536	98.0593	88.3336	89.01	104.805	106.561	98.0238	91.5608	100.543	97.7703	92.1642	95.3768	86.5762	94.0238		92.6804	97.8497	98.2212	99.3135	98.3475	98.9512	91.224	89.973	100.895	96.9042	100.712	117.215	95.1828	99.7979		95.9256	101.926	91.3021	94.7729	94.615	92.4858	99.1928				97.2369	97.416	87.435	88.6802	97.7601	91.8773	91.7475	100.956
	97.8092	103.125	98.1658	87.7518	89.4734	105.138	106.036	97.8228	90.8482	100.233	97.9122	92.5819	95.7942	86.5826	94.6616		92.8992	97.7577	98.3951	99.6168	98.6119	99.4513	91.3952	89.8257	101.019	96.6134	100.435	117.955	95.8435	99.7116		96.926	101.836	91.6875	93.5267	94.8012	92.7626	99.4748				97.8189	97.4486	87.3525	88.4229	97.5815	91.6194	91.0676	101.146
	97.387	104.418	98.0504	88.2099	89.7753	105.306	105.933	98.8984	91.423	99.7571	97.3062	93.1282	95.7459	86.8726	94.4371		92.7728	98.0819	98.6601	99.8473	98.2971	99.5016	91.7556	90.3277	100.725	96.3447	101.187	117.409	95.5319	99.5679		96.5581	101.677	92.3627	94.1978	94.1194	92.557	98.9496				98.2979	97.8895	86.2932	87.8267	97.2097	91.9251	91.2546	101.598
	97.0768	104.734	98.3875	88.5025	90.0823	105.466	106.162	98.9991	91.3566	99.873	97.3331	93.5087	96.0927	87.3298	94.359		93.2751	99.4371	98.1124	99.6124	98.9093	98.9675	91.9929	89.9401	100.374	97.0434	100.696	117.797	96.249	99.9989		95.9448	102.282	92.4314	94.2453	94.8201	92.8077	98.753				98.3451	98.0432	86.2911	87.7691	97.4644	91.8451	91.9002	102.603
	97.9525	104.54	98.7766	88.3932	90.3553	106.154	106.253	99.5891	90.4858	100.427	97.2787	92.736	95.4917	87.9869	94.5935		92.757	98.122	98.2456	100.065	98.8915	99.5138	92.0023	89.7998	100.929	97.0999	101.126	117.337	95.8782	99.8871		96.4593	101.881	93.03	93.8443	94.2335	93.1983	99.171				98.5724	99.6411	85.9155	87.6705	96.8458	92.0812	91.6459	102.867
	98.3042	103.982	99.1553	88.2432	90.0075	105.683	107.101	100.166	91.1447	100.541	97.135	93.5254	95.5551	88.2901	94.8234		93.1097	98.7925	98.9748	99.7522	98.7267	99.1204	91.8499	90.6508	100.043	96.7026	101.287	117.361	96.3528	99.9474		96.6432	102.146	92.674	93.4322	95.3332	93.2105	99.0543				98.9925	100.154	85.3603	87.6369	97.1273	91.7268	91.9443	103.214
	98.9876	104.026	98.432	88.4123	90.3366	105.716	106.057	100.681	91.3725	99.5784	96.6791	92.9998	96.0768	88.5996	95.3035		92.6665	99.4209	98.7328	99.2721	99.3304	99.8475	92.4541	90.374	100.851	96.6708	101.345	117.739	97.2583	100.128		96.2969	102.119	93.3728	93.3503	95.2129	93.3247	99.1439				99.778	101.277	85.1659	87.2408	96.836	92.0015	91.6173	103.88
	98.726	103.723	98.4702	88.6994	90.0518	105.926	106.357	101.168	91.2431	99.6935	96.979	93.4274	95.7596	88.3187	95.3695		93.1482	99.6859	97.9733	99.8544	99.5058	99.9506	92.7269	89.5008	102.008	96.4658	101.746	117.572	97.7379	99.4176		96.2165	101.985	93.4332	92.723	95.7409	93.6956	98.6674				100.046	100.936	84.9509	87.2607	96.1811	92.2351	91.4285	104.75
	98.3997	103.916	98.7565	88.3156	90.8177	106.112	106.917	101.629	91.2708	99.817	97.0421	93.3262	96.3274	88.4113	95.2493		92.3975	98.6533	99.2574	100.304	99.5727	100.61	92.8521	89.3053	101.688	97.2005	101.399	118	99.443	99.7402		96.568	102.282	93.6679	93.0276	96.5663	93.4518	98.9942				100.485	99.0266	84.4208	86.8801	96.5621	91.7021	91.3	105.285
	99.2642	104.336	98.5366	88.2912	90.6006	106.246	107.348	101.869	91.1954	99.6689	97.0713	94.0933	96.6334	88.5661	95.5172		93.2252	99.4199	100.105	100.109	100.26	100.222	92.9442	90.785	102.751	96.705	101.265	118.151	99.3259	99.6271		96.5394	102.196	93.5782	91.1377	98.0308	94.5794	100.401				100.697	98.0586	84.2048	86.34	96.5087	91.8601	91.8648	105.91
	98.3379	104.654	98.8602	88.6995	90.6373	106.758	107.181	102.256	90.9172	100.02	96.5433	94.0945	96.3491	89.2167	95.5185		93.3794	100.177	99.9335	100.505	100.238	100.343	93.2421	90.7162	102.777	96.167	101.456	118.049	99.8165	99.6694		97.974	102.425	93.8177	92.7038	97.4936	93.3037	99.4519				100.682	96.7937	84.164	86.9631	95.9977	91.6347	92.3228	106.33
[truncated: 59 more columns]

## Sheet: starvation in fbs- 20200310
1375.5	1937.31	1951.55	2859.81	2908.1	1424.06	1783.15	2081.96	3005.77		1342.76	1352.12	1423.6	2179.05		1858.24	1577.38	2843.97	2590.06	2022.06		1998.45	1998.53	1969.82	2003.18	2665.6	3045.86		1965.06	1969.14	2131.75	1656.31	2626.01	1378.53	2629.33	1355.35		1835.22	4013.47	2597.58	1851.74	2050.02	2174.97	2127.45	2155.37	1597.38	1959.87		1261.64	1422.41
1347.28	1994.15	1907.07	2822.6	2854.28	1420.21	1790.35	2091.75	3043.3		1351.35	1338.59	1423.78	2190.68		1862.13	1564.22	2838.17	2592.75	2021.27		1991.64	1911.6	1957.54	1977.61	2636.51	3020.96		1959.79	1963.58	2114.04	1653.09	2608.27	1363.87	2630.16	1345.98		1827.75	3998	2584.77	1852.42	2063.75	2162.36	2130.15	2151.75	1592.34	1954.36		1263.75	1426.47
1376.49	1936.73	1971.75	2856.46	2928.02	1396.75	1759.25	2098.29	2975		1343.77	1335.94	1413.02	2192.1		1872.66	1589.03	2835.97	2579.73	2013.64		2023.68	2018.69	1949.14	1986.25	2662.24	3030.42		1977.69	1958.24	2098.21	1655.31	2604.83	1361.55	2632.04	1341.48		1823.42	3978.9	2583.5	1848.05	2054.28	2173.32	2151.55	2156.83	1599.12	1961.39		1270.42	1426.13
1377.25	1936.73	1966.66	2848.49	2939.64	1371.67	1762.54	2092.82	2958.01		1334.7	1349.09	1425.57	2184.23		1872.02	1577.89	2841.68	2556.7	2010.13		2002.83	1954.5	1949.09	1948.21	2632.82	3008.82		1978.37	1956.38	2083.99	1652.14	2583.04	1354.82	2633.22	1338.9		1848.84	3976.61	2594.94	1845.01	2051.02	2166.4	2153.07	2164.64	1586.06	1972.05		1268.57	1423.75
1381.05	1943.01	1973.8	2854.17	2928.07	1378.36	1758.19	2094.35	2953.82		1344.73	1340.77	1429.59	2166.16		1856.45	1560.07	2846.67	2551.94	2026.57		1989.01	1943.37	1951.66	1933.72	2614.48	2994.66		1973	1962.82	2067.59	1648.52	2583.34	1344.89	2614.6	1329.23		1847.03	3941.92	2607.7	1843.27	2047	2149.56	2125.4	2157.45	1593.65	1953.97		1241.81	1446.5
1373.25	1952.25	1979.98	2881.59	2927.91	1378.57	1769.9	2091.67	2931.89		1355.32	1328.96	1422.13	2159.14		1861.59	1550.17	2828.09	2530.57	2018.03		1998.2	1954.6	1941.37	1943.46	2619.68	2968.99		1973.86	1959.23	2070.37	1649.96	2575.27	1348.9	2591.58	1329.78		1853.8	3950.48	2621.27	1846.8	2048.88	2164.24	2117.39	2156.31	1583.9	1955.2		1228.3	1453.23
1353.55	1953.62	1957.38	2884.58	2916.3	1374.48	1762.01	2110.16	2933.59		1351.35	1329.15	1425.79	2159.57		1843.63	1532.74	2840.92	2519.78	2022.6		1988.23	1942.17	1953.98	1926.42	2606.44	2964.35		1955.12	1946.86	2072.84	1603.36	2527.81	1409.03	2626.69	1362.84		1850.05	3932.89	2618.34	1836.26	2034.83	2172.96	2130.35	2155.56	1592.37	1928.95		1263.03	1408.91
1344.23	1950.64	1967.94	2910.88	2925.34	1372.3	1767.51	2098.96	2912.3		1357.92	1339.14	1442.13	2106.32		1815.26	1505.53	2824.45	2504.3	2017.79		1998.79	1943.54	1946.56	1927.42	2625.56	2949.5		1946.24	1942.41	2052.21	1636.39	2562.39	1319.23	2585.22	1315.94		1815.95	3925.67	2653.49	1847.56	2041.91	2070.98	2127.58	2165.64	1582.55	1899.25		1259.64	1406.15
1347.34	1947.01	1954.67	2895.66	2934.47	1378.08	1777.01	2103.47	2902.73		1352.36	1323.73	1414.59	2138.28		1885.34	1548.22	2851.38	2453.01	1996.56		1991.08	1957.82	1993.07	1915.72	2618.45	2967.18		1929.27	1929.71	2054.17	1624.26	2569.93	1303.58	2550.62	1311.66		1829.93	3902.79	2587.12	1826.59	2025.05	2168.58	2135.48	2123.41	1582.26	1917.89		1259.58	1408.52
1350.2	1971.81	1954.02	2905.05	2911.67	1376.39	1768.7	2114.52	2889.49		1351.52	1309.02	1404.75	2150.89		1874.45	1530.68	2882.39	2438.15	2011.07		1987.8	1919.8	1924.75	1908.82	2603.17	2897.64		1910.73	1930.48	2052.27	1612.7	2567.56	1295.09	2537.74	1306.12		1828.03	3881.95	2592.01	1821.05	2022.08	2173.82	2140.76	2089.66	1590.51	1901.31		1256.42	1414.87
1337.3	1975.23	1956.32	2886.12	2922.57	1364.45	1766.15	2106.32	2878.24		1338.49	1296.14	1411.28	2150.97		1781.8	1463.54	2790.87	2449	2005.85		1989.85	1908.24	1913.48	1900.58	2603.67	2885.2		1893.25	1911.31	2024.99	1596.4	2566.4	1281.77	2510.74	1294.17		1822.21	3870.76	2587.51	1810.03	2005.9	2166.44	2132	2077.06	1584.09	1890.93		1240.5	1399.64
1318.11	1959.33	1961.5	2909.56	2903.28	1362.21	1752.33	2096.09	2857.82		1336.06	1278.43	1412.54	2140.95		1739.76	1447.27	2784.82	2427.25	2017		1983.53	1896.3	1905.77	1895.44	2612.93	2851.72		1870.56	1906.61	2009.51	1599.45	2569.06	1277.43	2484.48	1291.75		1813.2	3876.34	2576.58	1806.19	1981.8	2166.2	2122.21	2051.92	1574.86	1891.6		1254.84	1398.55
1308.41	1978.05	1956.22	2929.47	2894.58	1364.14	1755.01	2103.37	2857.57		1341.75	1284.34	1412.68	2121.48		1708.5	1422.56	2778.11	2400.13	2016.19		1966.51	1871.95	1900.71	1887.67	2599.41	2821.05		1847.56	1897.52	1996.51	1591.3	2583.8	1269.01	2465.5	1260.75		1816.21	3862.38	2574.17	1780.68	1974.54	2155.4	2122.56	2028.7	1582.6	1871.53		1247.57	1400.15
1286.84	1981.1	1954.81	2919.86	2891.95	1357.51	1777.14	2088.38	2835.31		1321.45	1260.77	1422.39	2117.04		1707.74	1408.71	2763.34	2397.81	2004.41		1981.09	1873.86	1882.74	1870.63	2605.06	2794.82		1829.27	1878.81	1983.5	1587.63	2555.21	1254.62	2444.38	1257.69		1811.41	3870.51	2561.91	1780.18	1937.27	2140.05	2122.57	2015.15	1575.74	1851.54		1260.08	1392.28
1296.2	1988.39	1972.13	2930.51	2879.92	1356.81	1768.3	2095.9	2814.81		1318.66	1252.42	1417.07	2114.95		1690.72	1400.09	2741.24	2373.63	2007.88		1973.98	1847.33	1863.05	1870.76	2596.24	2773.27		1802.57	1868.96	1963.27	1572.64	2556.3	1248.77	2440.02	1250.12		1801.12	3844.21	2601.72	1785.93	1930.49	2153.59	2067.79	2018.17	1591.51	1802.24		1231.82	1394.29
1277.9	1975.97	1968.81	2920.54	2878.19	1373.56	1769.4	2101.12	2787.96		1316.51	1259.68	1415.78	2092.1		1673.42	1396.16	2707.02	2380.85	2010.22		1978.22	1825.21	1854.21	1862.41	2593.48	2745.68		1808.4	1856.15	1941.9	1562.84	2542.24	1230.81	2421.8	1241.85		1787.96	3831.97	2587.29	1756.17	1919.28	2137.54	2110.06	1972.33	1576.8	1843.4		1243.83	1404.51
1277.28	1980.68	1955.4	2905.83	2858.41	1362.5	1761.93	2099.47	2792.75		1291.97	1232.61	1418.22	2096.5		1670.89	1399.92	2702.08	2366.21	1998.42		1975.83	1809.33	1860.47	1863.01	2586.93	2732.19		1806.39	1837.41	1931.61	1554.23	2515.1	1239.52	2391.81	1224.14		1788.53	3802.47	2584.12	1740.64	1894.1	2123.76	2097.94	1977.32	1568.92	1831.05		1246.39	1396.43
1267.21	1974.85	1979.62	2904.79	2858.38	1361.91	1754.13	2095.19	2734.15		1288.39	1235.49	1419.1	2090.76		1649.85	1387.07	2679.95	2372.03	2006.39		1975.49	1819.97	1856.15	1850.77	2583.45	2731.34		1818.29	1824.6	1929.63	1539.74	2511.06	1218.38	2390.7	1218.13		1768.28	3812.1	2580.08	1729.67	1887.84	2135.63	2099.5	1965.13	1566.34	1834.4		1248.04	1396.98
1285.96	1974.23	1963.82	2898.88	2822.89	1355.92	1754.44	2087.69	2735.74		1272.6	1230.54	1412.45	2071.67		1646.67	1385.78	2675.99	2375.91	2007.67		1975.06	1808.07	1848.63	1842.26	2579.67	2717.15		1807.05	1819.43	1905.23	1541.13	2484.96	1221.27	2384.2	1221.92		1774.89	3800.76	2592.28	1709.67	1875.86	2108.97	2100.19	1968.07	1563.23	1841.45		1237.03	1392.09
1263.71	1979.11	1964.16	2884.75	2813.89	1362.24	1756.37	2090.88	2703.46		1265.59	1236.46	1404.2	2058.34		1631.89	1378.94	2665.41	2357.32	2016.47		1963.43	1802.3	1844.13	1815.94	2577.82	2709.43		1825.8	1806.47	1903.49	1526.49	2464.15	1219.01	2358.68	1223.99		1782.37	3779.6	2593.51	1705.38	1851.86	2096.34	2101.53	2015.72	1558.87	1839.84		1239.7	1395.01
1244.88	1959.46	1959.33	2881.77	2784.93	1351.37	1753.1	2072.16	2698.16		1266.41	1232.61	1414.31	2060.91		1624.94	1371.57	2650.94	2378.85	2022.8		1963.24	1785.76	1842.69	1832.07	2568.22	2709.24		1827.33	1804.73	1883.05	1516.24	2443.39	1221.62	2342.27	1219.25		1764.39	3767.34	2585.77	1701.52	1856.32	2091.99	2109	2019.38	1552.91	1849.05		1249.43	1393.53
1242.51	1958.18	1959.92	2866.34	2781.78	1351.93	1759.36	2065.16	2690.19		1257.48	1227.69	1410.29	2045.03		1631.92	1370.53	2653.88	2376.54	2006.36		1972.78	1849.95	1877.71	1825.4	2597.27	2738.64		1821.58	1790.49	1884.84	1535.18	2420.05	1217.13	2329.21	1208.49		1776.84	3755.63	2572.08	1687.68	1836.9	2084.68	2108.81	2023.86	1537.7	1849.21		1239.08	1393.24
1237.41	1944.57	1955.37	2857.68	2780.71	1355.48	1751.9	2056.95	2663.16		1255.92	1251.53	1410.1	2035.72		1650.36	1366.66	2639.75	2384.2	2007.54		1965.77	1784.85	1834.56	1800.18	2565.58	2694.57		1831.47	1777.43	1865.73	1513.13	2415.73	1216.14	2322.13	1203.86		1751.86	3748.14	2578.84	1685.56	1839.49	2069.29	2092.47	2026.87	1530.41	1848.8		1247.36	1385.92
1238.39	1944.77	1969.01	2855.93	2769.77	1354.17	1764.96	2055.17	2683.06		1244.62	1248.38	1414.63	2037.1		1640.06	1364.01	2635.93	2383.23	2024.35		1962.64	1786.85	1832.71	1799.86	2562.92	2698.87		1837.28	1780.6	1863.59	1498.38	2400.77	1212.11	2329.64	1208.3		1761.73	3719.61	2566.5	1669.9	1819.98	2068.17	2092.99	1989.64	1526.39	1855.28		1231.63	1380.77
1236.3	1937.07	1971.85	2845.7	2765.99	1345.68	1756.76	2037.44	2678.16		1248.41	1249.24	1400.29	2021.03		1637.45	1378.63	2631.35	2389.49	2027.73		1945.38	1776.46	1827.06	1780.54	2564.22	2702.38		1840.26	1774.76	1869.9	1509.55	2397.24	1228.96	2331.23	1204.38		1734.42	3734.2	2575.11	1687.54	1829.27	2074.33	2101.2	2002.53	1526.73	1857.53		1247.51	1378.11
1241.46	1920.85	1980.83	2819.71	2761.89	1350.47	1746.75	2037.85	2662.73		1245.71	1255.67	1407.49	2005.05		1641.95	1368.43	2620.73	2396.78	2016.46		1952.55	1756.2	1842.06	1780.32	2555.51	2704.06		1841.85	1763.46	1864.38	1505.9	2385.96	1221.42	2335.89	1220.64		1749.14	3717.35	2568.96	1684.91	1827.37	2059.37	2096.73	2007.45	1524.56	1876.38		1238.44	1364.75
1225.71	1929.39	1990.26	2816	2753.22	1350.31	1754.4	2037.34	2664.94		1253.1	1249.16	1410.74	2017.14		1615.83	1369.76	2632.42	2390.87	2022.18		1960.96	1856.04	1815.53	1830.52	2592.69	2720.54		1841.86	1771.66	1865.38	1493.76	2394.86	1223.44	2330.25	1220.78		1738.71	3712.29	2567.76	1687.74	1831.68	2058.27	2079.04	2006.36	1509.01	1869.22		1243.76	1358.22
1236.62	1918.5	1999.15	2812.6	2763.04	1350.48	1753.26	2021.25	2679.57		1277.26	1286.65	1445.36	1986.47		1650.52	1385.8	2517.52	2419.37	1983.22		1936.43	1808.04	1902.6	1787.97	2565.68	2749.38		1846.11	1763.56	1874.33	1485.94	2391.42	1219.55	2333.34	1219.25		1747.54	3711.34	2558.21	1694.76	1833.56	2061.06	2085.68	2018.54	1500.85	1881.94		1245.5	1346.26
1203.7	1980.8	1986.46	2776.22	2690.97	1348.9	1781.16	2037.75	2736.91		1252.72	1274.28	1399.48	2005.41		1630.43	1376.87	2632.08	2392.35	2011.6		1950.62	1750.92	1866.67	1758.19	2528.58	2717.27		1852.66	1770.89	1874.81	1493.07	2383.79	1225.23	2337.38	1224.21		1739.44	3686.5	2563.72	1687.76	1845.66	2061.66	2084.7	2005.56	1518.96	1892.9		1235.07	1342.41
1229.08	1909.54	1983.63	2792.96	2758.74	1338.88	1739.51	2032.46	2668.76		1252.76	1273.13	1394.58	1994.47		1614.82	1374.26	2641.76	2392.47	2015.24		1946.3	1757.42	1882.14	1761.58	2536.04	2716.43		1864.59	1770.56	1868.74	1489.4	2389.47	1219.89	2344.9	1239.4		1729.31	3688.95	2564.18	1693.67	1842.03	2069.28	2073.65	2019.95	1522.57	1889.68		1238.98	1335.47
1236.27	1904.77	1984.93	2783.35	2758.21	1348.27	1737.61	2020.06	2681.59		1254.42	1275.54	1411.81	1995.42		1628.65	1371.78	2628.58	2411.32	2018.37		1952.7	1742.84	1883.06	1772.61	2528.71	2721.75		1863.25	1775.04	1881.32	1496.02	2400.54	1217.3	2350.77	1243.96		1737.21	3666.44	2552.58	1691.86	1826.16	2065.37	2083.59	2019.23	1529.01	1886.94		1244.33	1330.78
1241.18	1913.8	2000.23	2781.63	2774.6	1356.06	1736.03	2016.85	2688.14		1265.32	1284.5	1400.05	1995.33		1615.81	1396.55	2632.72	2425.38	2017.27		1945.74	1757.97	1890.5	1759.12	2536.06	2741.08		1867.24	1776.54	1885.46	1504.02	2390.75	1235.26	2372.85	1253.93		1719.26	3659.7	2563.7	1685.95	1833.42	2073.11	2083.11	2035.9	1541.06	1916.97		1242.27	1330.23
1229.06	1895.65	2011.71	2791.21	2768.26	1359.72	1735.55	2017.6	2704.18		1270.53	1293.63	1400.47	1997.07		1603.39	1383.65	2624.63	2416.55	2021.73		1950.15	1756.14	1896.09	1775.42	2528.66	2760.28		1859.97	1782.09	1884.73	1487.38	2400.26	1229.16	2365.45	1260.15		1724.5	3647.89	2547.57	1700.76	1838.72	2067.77	2063.18	2034.51	1536.47	1911.76		1249.36	1320.59
1237.26	1913.35	2009.81	2762.42	2790.04	1351.68	1724.46	2025.1	2703.47		1268.64	1275.95	1393.83	2004.86		1629.43	1398.22	2631.51	2424.7	2017.58		1946.83	1753.47	1906.59	1782.94	2535.58	2755.25		1867.43	1777	1882.96	1492.69	2407.37	1237.57	2365.62	1257.44		1718.05	3638.53	2538.07	1711.58	1849.21	2070.42	2052.71	2044.72	1537.43	1911.08		1256.94	1325.85
1227.75	1918.13	2005.61	2783.68	2794.99	1351.16	1728.43	2031.52	2713.33		1270.99	1295.22	1408.07	2006.13		1737.49	1448.94	2736.6	2368.36	2031.13		1945.85	1749.52	1913.02	1772.35	2553.52	2766.83		1872.04	1788.28	1881.07	1491.2	2411.4	1239.16	2379.44	1273.17		1717.09	3635.25	2553.82	1709.58	1848.12	2092.5	2046.5	2048.24	1528.71	1913.12		1256.38	1308.85
1224.51	1955.5	2008.27	2779.15	2794.53	1360.2	1745.5	2042.7	2741.46		1271.72	1297.37	1401.43	2012.29		1615.47	1399.75	2632.31	2423.9	2026.33		1955.09	1751.18	1924.42	1776.6	2534.48	2770.06		1867.22	1803.21	1887.9	1506.72	2420.37	1226.43	2368.86	1272.05		1730.87	3620.63	2540.42	1725.16	1854.03	2094.85	2051.93	2056.27	1530.02	1922.69		1250.62	1318.74
1229.37	1965.92	2032.96	2769.99	2810.66	1362.4	1741.68	2027.14	2755.99		1275.31	1296.83	1399.6	2020.22		1636.25	1394.17	2636.8	2423.25	2016.53		1974.62	1834.41	1903.12	1822.91	2583.15	2797.86		1867.68	1802.38	1891.17	1507.23	2417.75	1237.44	2386.04	1273.76		1714.63	3614.11	2527.77	1716.17	1857.62	2098.91	2039.95	2059.12	1539.23	1918.51		1261.7	1312.49
1192.85	1997.57	2063.25	2740.8	2690.79	1366.06	1763.69	2043.57	2863.75		1281.36	1313.93	1421.34	1977.93		1631.15	1403.32	2651.57	2437.92	2026.76		1958.14	1754.89	1931.64	1780.03	2541.2	2787.47		1869.31	1814.59	1897.19	1499.18	2409.11	1237.76	2390.52	1279.88		1721.07	3611.75	2560.17	1726.77	1862.99	2133.7	1999.31	2094.44	1552.86	1884.01		1238.21	1346.12
1247.69	1911.14	2052.32	2750.1	2822.27	1363.38	1729.39	2033.3	2803.61		1283.75	1298.13	1388.67	2040.19		1709.81	1468.13	2665.06	2418.93	2011.81		1976.62	1814.16	1965.94	1786.59	2556.8	2836.58		1878.82	1822.52	1898.28	1498.95	2417.06	1239.63	2416.34	1277.44		1731.01	3591.75	2544.16	1726.75	1861.3	2101.55	2033.72	2064.04	1545.57	1932.19		1270.07	1335.53
1272.49	1993.42	2116.32	2783.67	2743.82	1380.41	1769.66	2044.04	2893.17		1283.69	1310.59	1400.3	1974.36		1723.87	1461.79	2713.32	2413.3	2032.15		1963.26	1760.16	1948.91	1794.07	2562.14	2798.9		1882.4	1822.24	1897.59	1494.71	2413.7	1242.55	2399.13	1285.91		1760.07	3580.09	2597.87	1727.85	1883.93	1995.24	2010.8	2080.55	1550.64	1884.61		1248.08	1331.45
1217.6	1982.73	2101.69	2758.11	2720.11	1388.19	1742.51	2066.33	2932.14		1283.59	1307.13	1385.08	2038.76		1643.68	1418.96	2688	2439.73	2034.25		1972.88	1808.79	1998.78	1797.34	2565.4	2851.29		1861.51	1831.89	1922.23	1455.35	2418.27	1302.94	2454.75	1361.13		1720.16	3583.7	2512.63	1720.33	1881.41	2101.82	2024.64	2065.79	1550.51	1943.82		1265.36	1313.45
1257.03	1917.45	2067.64	2761.12	2820.89	1382.68	1721.76	2048.02	2871.01		1298.7	1311.77	1385.82	1968.66		1629.84	1427.95	2671.29	2436.8	2033.22		1996.4	1765.29	1951.26	1776.52	2562.12	2829.7		1884.5	1848.93	1899.39	1493.94	2436.27	1250.37	2417.48	1284.62		1741.93	3567.8	2552.39	1730.51	1888.06	2071.4	1993.45	2101.46	1564.3	1892.61		1240.42	1330.52
1247.55	1926.2	2069.63	2756.51	2830.39	1385.36	1710.07	2060.69	2884.51		1286.37	1305.89	1381.95	2042.78		1739.52	1467.45	2770.88	2398.37	2054.1		1976.88	1809.01	1980.39	1784.21	2581.47	2876.82		1879.86	1858.85	1930.45	1448.8	2411.01	1272.93	2454.31	1365.62		1731.08	3561.55	2510.71	1725.87	1883.46	2131.59	2016.03	2076.36	1564.4	1953.33		1262.93	1310.6
1216.03	1978.64	2130.07	2768.02	2726.79	1405.76	1754.64	2070.98	2986.7		1297.84	1321.18	1404.91	1991.13		1666.94	1426.1	2681.42	2427.71	2044.5		1988.6	1860.44	1904.46	1843.44	2586.82	2873.71		1872.5	1850.73	1935.42	1448.31	2416.27	1326.02	2487.99	1372.62		1722.9	3566.4	2513.17	1730	1890.27	2167.54	1974.39	2108.39	1562.77	1895.69		1292.17	1326.15
1258.52	1911.53	2069.68	2762.4	2833.78	1408.01	1723.51	2061.43	2929.3		1321.05	1300.2	1382.78	2054.95		1765.82	1471.49	2804.54	2363.76	2056.35		1964.42	1775.37	1995.11	1775.51	2576.93	2894.4		1879.04	1855.76	1932.05	1457.1	2415.38	1322.3	2480.07	1376.02		1720.78	3551.24	2504	1732.32	1894.93	2120.86	2010.2	2076.66	1564.65	1946.78		1273.57	1313.42
1215.81	1976.12	2106.71	2759.41	2728.06	1416.45	1766.99	2081.19	3045.15		1313.47	1303.47	1385.21	2062.05		1727.46	1498.35	2703.76	2403.13	2022.8		1996.9	1865.8	1905.89	1836.65	2614.14	2869.24		1902.12	1860.48	1911.2	1502.84	2449.65	1262.84	2453.6	1296.73		1768.13	3546	2578.87	1744.75	1908.23	2036.53	1982.49	2099	1565.31	1897.81		1269.67	1298.86
1263.93	1910.3	2063.37	2768.61	2830.51	1409.56	1718.37	2061.5	2968.63		1322.19	1304.76	1383.42	2075.09		1682.93	1435.44	2682.55	2428.35	2044.03		1985.95	1768.66	1952.43	1784.35	2573.69	2863.1		1899.38	1873.67	1909.36	1499.38	2461.06	1262.26	2457.02	1304.88		1731.95	3560.07	2490.06	1742.5	1903.15	2133.51	1998.82	2077.17	1569.29	1944.23		1285.15	1309.75
1216.33	1975.1	2075.12	2761.53	2725.01	1426.56	1746.62	2086.49	3062.63		1323.19	1307.19	1399.33	2077.3		1650.46	1447.96	2697.74	2412.68	2045.03		1988.24	1770.29	1954.16	1794.71	2583.05	2871.62		1905.85	1863.17	1908.46	1504.83	2459.53	1261.22	2478.53	1300.02		1726.38	3570.57	2495.21	1732.42	1912.09	2125.81	1989.74	2074.35	1559.59	1951.38		1295.02	1303.35
1260.31	1924.85	2094.26	2762.83	2850.62	1418.64	1724.7	2066.96	3008.85		1346.23	1310.03	1401.21	2100.24		1721.92	1497.22	2646.92	2426.7	2023.21		1979.13	1754.67	2021.89	1785.61	2585.41	2911.17		1900.75	1871.97	1924.21	1506.28	2463.44	1262.49	2470.28	1306.96		1760.03	3565.43	2569.44	1749.49	1925.02	2025.31	1971.83	2092.25	1557.39	1900.08		1286.92	1308.45
1259.6	1932.06	2077.09	2774.2	2846.58	1422.25	1728.94	2082.86	3012.43		1348.19	1316.66	1400.08	2098.98		1696.52	1446.84	2725.87	2434.81	2047.8		1984.75	1775.58	1972.48	1790.67	2591.87	2886.43		1899.85	1884.03	1933.95	1511.16	2477.19	1264.33	2481.66	1314.01		1734.02	3575.76	2492.77	1730.67	1894.17	2144.39	1988.51	2070.56	1577.81	1949.66		1291.83	1308.96
1271.86	1924.07	2074.18	2778.93	2832.42	1416.95	1713.7	2082.51	3025.95		1349.55	1313.29	1392.81	2101.5		1680.56	1448.65	2720.3	2417.44	2053.08		1987.2	1778.87	1972.55	1793.62	2586.95	2896.61		1922.83	1882.01	1923.76	1502.11	2478.31	1265.87	2480.88	1322.83		1731.83	3584.91	2488.62	1732.15	1909.93	2161.88	1984.15	2085.24	1580.04	1949.31		1287.49	1303.45
1198.93	1886.94	2059.49	2784.44	2604.5	1433.12	1733.84	2092.23	3111.55		1346.72	1316.63	1395.93	2107.32		1738.73	1527.51	2707.89	2418.31	2009.17		2007.69	1783.96	1964.58	1805.63	2606.05	2902.27		1916.39	1888.52	1927.97	1500.66	2476.1	1279.68	2496.88	1330.92		1742.03	3589.06	2487.02	1746.43	1917.42	2174.95	1978.14	2077.29	1591.32	1965.62		1267.79	1327.63
1265.95	1942.16	2079.93	2786.12	2865.72	1439.38	1737.07	2084.75	3027.98		1367.1	1319.72	1401.85	2121.55		1701.69	1445.35	2732.49	2431.84	2045.2		1996.56	1784.42	1977.97	1785.68	2612.58	2904.63		1922.37	1902.73	1932.04	1504.67	2479.76	1270.76	2503.15	1321.12		1740.12	3581.83	2488.35	1733.93	1914.41	2180.33	1978.11	2088.72	1578.29	1960.8		1310.61	1305.34
1274.16	1929.24	2085.02	2789.59	2847.58	1446.69	1731.32	2087.56	3041		1366.39	1329.73	1386.85	2122.88		1696.84	1448.21	2720.32	2433.1	2045.05		1998.54	1798.69	1972.08	1797.47	2618.61	2927.04		1916.64	1901.47	1946.11	1513.7	2478.68	1270.49	2508.72	1339.42		1747.53	3585.96	2479.07	1738.53	1917.53	2197.93	1991.35	2095.69	1588.8	1967.57		1305.31	1311.25
1264.32	1948.42	2064.95	2790.67	2853.36	1445.69	1735.69	2077.78	3045.81		1377.54	1321.54	1413.95	2131.68		1696.22	1461.35	2727.89	2427.26	2046.79		1997.27	1784.58	1958.17	1795.27	2622.48	2926.95		1928.79	1906.69	1955.38	1507.05	2488.52	1272.28	2506.28	1345.08		1768.49	3587.64	2495.55	1753.4	1921.43	2182.59	1981.09	2092.8	1584.19	1964.14		1306.73	1310.37
1268.15	1943.24	2078.54	2793	2873.51	1456.13	1718.5	2083.76	3053.71		1374.96	1308.3	1408.5	2120.27		1691.94	1468.66	2732.56	2434.31	2053.27		2002.96	1804.34	1976.76	1787.48	2629.98	2926.34		1912.87	1925.93	1989.97	1463.98	2481.5	1318.03	2542.15	1445.14		1739.32	3582.09	2503.47	1746.12	1923.61	2205.28	1980.4	2087.18	1592.31	1958.84		1302.28	1318.05
1271.89	1947.92	2092.81	2803.16	2850.79	1466.65	1719.46	2086.24	3070.15		1388.38	1325.2	1406.42	2131.89		1682.96	1486.3	2762.16	2433.24	2058.14		2042.17	1916.14	1838.65	1862.32	2661.31	2929.27		1918.8	1916.05	1957.86	1516.62	2492.36	1286.58	2530.38	1362.59		1748.16	3576.16	2509.79	1739.07	1935.83	2202.02	1983.96	2106.61	1595.97	1971.94		1302.29	1305.73
1255.59	2015.1	2121.47	2845.92	2776.55	1485.73	1762.99	2093.94	3153.71		1378.61	1316.8	1410.64	2136.34		1702.04	1476.05	2745.63	2440.1	2059.62		2029.27	1822.85	1964.19	1809.84	2629.58	2949.3		1926.71	1929.46	1961.22	1511.04	2507.12	1293.19	2541	1380.13		1771.15	3589.21	2503.3	1752.9	1941.35	2205.3	1976.88	2099.2	1589.79	1960.92		1268.06	1333.5
1305.53	2023.26	2271.08	2895.47	2811.98	1477.08	1774.55	2089.06	3189.89		1391.61	1323.08	1417.75	2132.33		1700.17	1481.09	2758.98	2424.87	2067.13		2028.48	1815.48	1974.01	1806.19	2625.83	2950.14		1934.99	1918.29	1948.91	1503.12	2503.32	1284.88	2533.09	1400.24		1757.22	3596.83	2501.41	1753.86	1942.69	2211.53	1976.97	2108.8	1605.65	1952.94		1313.01	1311.07
1268.26	2015.75	2196.21	2849.86	2785.25	1486.05	1756.93	2104.04	3171.41		1399.42	1332.47	1407.04	2142.79		1705.85	1461.85	2757.77	2433.35	2051.17		2033.95	1819.14	1969.25	1817.8	2642.33	2956.81		1927.22	1925.89	1966.18	1520.4	2512.52	1288.76	2541.03	1400.06		1749.58	3590.23	2495.72	1750.24	1950.54	2216.52	1966.56	2099.59	1593.24	1965.34		1279.88	1355.91
1312.1	2014.22	2194.4	2890.1	2791.73	1502.17	1776.31	2102.31	3191.28		1392.97	1330.12	1417.99	2131.41		1734.91	1535.92	2708.65	2456.16	2027.3		2044.75	1889.87	1928.92	1827.18	2659.87	3014.2		1942.73	1937.07	1970.91	1522.31	2516.39	1293.8	2543.75	1426.11		1802.76	3584.86	2577.9	1778.75	1962.8	2088.52	1958.06	2124.73	1584.08	1908.85		1317.45	1311.35
100	100	100	100	100	100	100	100	100		100	100	100	100		100	100	100	100	100		100	100	100	100	100	100		100	100	100	100	100	100	100	100		100	100	100	100	100	100	100	100	100	100		100	100
97.949	102.934	97.7212	98.6987	98.1492	99.7296	100.404	100.47	101.249		100.64	98.9996	100.013	100.534		100.21	99.1659	99.7961	100.104	99.9611		99.6594	95.6501	99.3764	98.7234	98.9087	99.1825		99.7314	99.7177	99.1695	99.8059	99.3243	98.9365	100.032	99.3084		99.5931	99.6144	99.507	100.037	100.67	99.4202	100.127	99.8317	99.6844	99.7191		100.167	100.285
100.072	99.97	101.035	99.8827	100.685	98.0828	98.6594	100.784	98.9765		100.076	98.8037	99.257	100.599		100.776	100.739	99.7187	99.6014	99.5834		101.263	101.008	98.9499	99.1546	99.8739	99.4928		100.642	99.4466	98.4269	99.9393	99.1933	98.7677	100.103	98.9768		99.3567	99.1386	99.4582	99.8005	100.208	99.9242	101.133	100.068	100.109	100.078		100.696	100.261
100.127	99.97	100.774	99.6042	101.085	96.3213	98.8444	100.522	98.4111		99.3996	99.7762	100.139	100.238		100.742	100.032	99.9193	98.7122	99.41		100.219	97.7966	98.9472	97.2555	98.7703	98.7837		100.677	99.3523	97.7598	99.7484	98.3636	98.2795	100.148	98.7865		100.742	99.0815	99.8983	99.6363	100.049	99.6061	101.204	100.43	99.2916	100.622		100.549	100.094
100.404	100.294	101.14	99.8026	100.687	96.7909	98.6002	100.595	98.2719		100.147	99.1608	100.421	99.4085		99.9039	98.903	100.095	98.5283	100.223		99.5274	97.2396	99.0777	96.5324	98.0823	98.319		100.404	99.6793	96.9906	99.5297	98.3752	97.5591	99.4399	98.0727		100.643	98.2172	100.39	99.5423	99.8528	98.8318	99.9039	100.096	99.7666	99.6992		98.4284	101.693
99.8365	100.771	101.457	100.762	100.681	96.8056	99.2569	100.466	97.5423		100.935	98.2878	99.8972	99.0866		100.18	98.2753	99.4416	97.7032	99.8006		99.9873	97.8017	98.5554	97.0186	98.2775	97.4761		100.447	99.4968	97.121	99.6168	98.0679	97.8505	98.5645	98.113		101.012	98.4305	100.912	99.7333	99.9444	99.5066	99.5275	100.044	99.1561	99.7617		97.357	102.166
98.4048	100.842	100.299	100.866	100.282	96.5188	98.8144	101.354	97.5988		100.64	98.3012	100.154	99.1062		99.2141	97.1705	99.8927	97.2867	100.027		99.4884	97.1796	99.1954	96.168	97.7806	97.3237		99.4937	98.8687	97.2366	96.8031	96.2604	102.212	99.8997	100.553		100.808	97.9923	100.799	99.164	99.2592	99.9078	100.136	100.009	99.6867	98.4225		100.11	99.0505
97.7266	100.688	100.84	101.786	100.593	96.3655	99.1229	100.817	96.8905		101.129	99.0401	101.302	96.6623		97.6871	95.4451	99.3137	96.689	99.7888		100.017	97.2483	98.8187	96.2178	98.4982	96.8363		99.0422	98.6426	96.2688	98.7974	97.5773	95.698	98.3224	97.0924		98.9501	97.8123	102.152	99.7744	99.6047	95.2188	100.006	100.476	99.0718	96.907		99.8417	98.857
97.9527	100.501	100.16	101.253	100.907	96.7719	99.6556	101.033	96.5721		100.715	97.9007	99.3676	98.129		101.459	98.1515	100.26	94.7087	98.739		99.6312	97.9626	101.18	95.6338	98.2313	97.4168		98.1786	97.9977	96.3609	98.0648	97.8644	94.5629	97.0066	96.7762		99.7118	97.2422	99.5972	98.6419	98.7823	99.7061	100.378	98.5172	99.0534	97.8583		99.8364	99.0236
98.1606	101.781	100.127	101.582	100.123	96.6531	99.1898	101.564	96.1315		100.653	96.8124	98.6759	98.7077		100.873	97.0395	101.351	94.1348	99.4567		99.4672	96.0606	97.7119	95.2892	97.6581	95.1335		97.2348	98.037	96.2716	97.3669	97.7741	93.9468	96.5166	96.3673		99.6079	96.723	99.7856	98.3425	98.637	99.9471	100.626	96.951	99.57	97.0122		99.5859	99.4699
97.2228	101.957	100.245	100.92	100.497	95.8144	99.0468	101.17	95.7572		99.6818	95.8598	99.1348	98.7117		95.8866	92.7833	98.1329	94.5541	99.1982		99.5699	95.4822	97.1395	94.878	97.6768	94.7253		96.3456	97.0634	94.9921	96.3831	97.7301	92.9809	95.49	95.4863		99.2911	96.4443	99.6123	97.7475	97.8479	99.6077	100.214	96.3664	99.1683	96.4824		98.3242	98.399
95.8278	101.137	100.51	101.74	99.8343	95.6573	98.2717	100.679	95.078		99.5014	94.55	99.2231	98.2519		93.6244	91.7518	97.9201	93.7142	99.75		99.2533	94.8843	96.748	94.6215	98.024	93.6259		95.191	96.8247	94.266	96.5669	97.8311	92.6659	94.491	95.3074		98.8	96.5832	99.1914	97.54	96.6724	99.5968	99.7537	95.2002	98.5902	96.5169		99.4609	98.3227
95.1226	102.103	100.24	102.436	99.535	95.7924	98.4216	101.028	95.0697		99.9249	94.9871	99.2328	97.358		91.9419	90.185	97.6842	92.6671	99.7098		98.4018	93.6659	96.4914	94.2334	97.517	92.6192		94.0202	96.363	93.656	96.0751	98.3927	92.0549	93.7694	93.0198		98.9644	96.2355	99.0987	96.1624	96.3183	99.1004	99.7702	94.1228	99.0747	95.4926		98.8847	98.435
93.5547	102.26	100.167	102.1	99.4448	95.3269	99.6628	100.308	94.3292		98.4129	93.2445	99.9154	97.1542		91.9012	89.3071	97.1649	92.5775	99.1269		99.1314	93.7619	95.5789	93.3831	97.729	91.758		93.0897	95.4126	93.0455	95.8537	97.3039	91.0109	92.9661	92.7943		98.7023	96.4378	98.6268	96.1353	94.5001	98.3946	99.7707	93.494	98.6452	94.4725		99.876	97.8819
94.2354	102.637	101.055	102.472	99.0311	95.278	99.1673	100.669	93.647		98.2057	92.6263	99.5413	97.0586		90.9851	88.7607	96.3879	91.6441	99.2989		98.7754	92.4344	94.5795	93.3892	97.398	91.0504		91.7307	94.9127	92.0969	94.9484	97.3453	90.5869	92.8003	92.2358		98.142	95.7826	100.159	96.446	94.1694	99.017	97.196	93.6345	99.6329	91.9571		97.6362	98.0231
92.9049	101.996	100.885	102.123	98.9715	96.454	99.2289	100.92	92.7539		98.0454	93.1639	99.4506	96.0099		90.0542	88.5115	95.1846	91.9225	99.4146		98.9878	91.3273	94.1309	92.9724	97.2945	90.1444		92.0274	94.2619	91.0944	94.3565	96.8099	89.2842	92.1072	91.626		97.4249	95.4776	99.604	94.8389	93.6224	98.2789	99.1826	91.5078	98.7119	94.0576		98.5884	98.7412
92.8594	102.239	100.197	101.609	98.2914	95.6777	98.81	100.841	92.9132		96.2179	91.1617	99.622	96.212		89.9182	88.7499	95.0109	91.3577	98.8311		98.868	90.5329	94.4483	93.0026	97.0487	89.7017		91.9251	93.3104	90.6114	93.8366	95.7765	89.9159	90.9667	90.3191		97.4556	94.7426	99.4817	94	92.3941	97.6455	98.613	91.739	98.2183	93.4275		98.7912	98.1737
92.1277	101.938	101.439	101.573	98.2904	95.6359	98.3723	100.635	90.9635		95.9507	91.3745	99.6842	95.9484		88.7857	87.9353	94.2326	91.5822	99.2251		98.8514	91.0652	94.2293	92.3917	96.9183	89.6737		92.531	92.6599	90.5185	92.9618	95.6226	88.3825	90.9244	89.8753		96.3526	94.9825	99.3261	93.4077	92.0887	98.1911	98.6865	91.1737	98.057	93.5984		98.9222	98.2123
93.4909	101.906	100.629	101.366	97.0698	95.2154	98.3901	100.275	91.0163		94.7748	91.0087	99.2167	95.0725		88.6148	87.8533	94.0934	91.7321	99.2885		98.8298	90.4698	93.8472	91.9668	96.7764	89.2079		91.9589	92.3974	89.3739	93.0462	94.6286	88.5919	90.677	90.1549		96.7126	94.7001	99.796	92.3277	91.5047	96.9657	98.7186	91.3098	97.862	93.958		98.049	97.8683
91.8732	102.157	100.646	100.872	96.7604	95.659	98.4979	100.428	89.9425		94.2529	91.4463	98.6376	94.4607		87.8191	87.4197	93.7215	91.0144	99.7237		98.2477	90.1812	93.6192	90.6529	96.7069	88.9545		92.9128	91.7394	89.2927	92.1619	93.8362	88.4282	89.7066	90.3076		97.12	94.1728	99.8435	92.0958	90.3338	96.3847	98.7819	93.5207	97.5892	93.8756		98.2612	98.0734
90.5043	101.143	100.399	100.768	95.7647	94.8961	98.315	99.5291	89.7663		94.3143	91.1618	99.3476	94.5786		87.4454	86.9526	93.2125	91.8455	100.036		98.2382	89.3534	93.5456	91.4578	96.3469	88.9482		92.9908	91.6509	88.3335	91.5432	93.0457	88.6171	89.0825	89.9585		96.1407	93.8674	99.5453	91.8875	90.5514	96.1846	99.1328	93.6905	97.216	94.3459		99.0321	97.9692
90.3314	101.077	100.429	100.228	95.6562	94.9354	98.6657	99.193	89.5009		93.6488	90.7978	99.0654	93.8495		87.8209	86.8869	93.3162	91.7562	99.2234		98.7153	92.5656	95.3239	91.1251	97.4368	89.9135		92.6982	90.9275	88.4175	92.6869	92.1568	88.2914	88.5859	89.1644		96.819	93.5755	99.0183	91.1402	89.6041	95.8489	99.124	93.8982	96.2642	94.3537		98.2121	97.9492
89.9611	100.375	100.196	99.9255	95.6194	95.1843	98.2476	98.7987	88.6017		93.533	92.5608	99.0518	93.4223		88.813	86.6411	92.8193	92.0521	99.2821		98.3647	89.308	93.1334	89.8658	96.248	88.4667		93.2016	90.2643	87.5211	91.3558	91.9924	88.2198	88.3167	88.8229		95.458	93.3889	99.2787	91.0258	89.7304	95.1414	98.356	94.038	95.8077	94.333		98.8679	97.4347
90.0325	100.385	100.895	99.8643	95.2432	95.0924	98.9797	98.7133	89.2636		92.6913	92.3276	99.37	93.486		88.2591	86.4731	92.6848	92.0147	100.113		98.208	89.4081	93.039	89.8498	96.148	88.6076		93.4972	90.4256	87.4209	90.4647	91.4227	87.9276	88.6022	89.1504		95.9957	92.678	98.8035	90.1802	88.7785	95.0898	98.3803	92.3105	95.5557	94.6637		97.6212	97.0721
89.8804	99.9874	101.04	99.5065	95.1134	94.4966	98.5199	97.8618	89.1006		92.9737	92.3918	98.3627	92.7483		88.1184	87.4005	92.5237	92.2563	100.281		97.3443	88.8879	92.7522	88.8855	96.1969	88.723		93.6488	90.1286	87.7169	91.1395	91.2882	89.1498	88.6627	88.8614		94.5073	93.0417	99.135	91.1324	89.232	95.3729	98.7661	92.9089	95.5775	94.7785		98.8797	96.8856
90.2556	99.1504	101.5	98.5978	94.9724	94.8324	97.9586	97.8814	88.5873		92.7724	92.867	98.8683	92.0148		88.3605	86.7536	92.1505	92.5377	99.7232		97.7031	87.8745	93.514	88.8745	95.8702	88.7782		93.7299	89.5549	87.458	90.9188	90.8588	88.6027	88.84	90.0606		95.3096	92.6218	98.8981	90.9904	89.1392	94.6852	98.5559	93.1372	95.4412	95.7401		98.1609	95.9459
89.1102	99.5908	101.984	98.4679	94.6743	94.8212	98.3877	97.8569	88.661		93.3227	92.3853	99.0968	92.5699		86.955	86.838	92.5615	92.3098	100.006		98.1239	92.8699	92.167	91.3807	97.2648	89.3191		93.7304	89.9715	87.5046	90.1863	91.1974	88.7492	88.6252	90.0714		94.7414	92.4957	98.8519	91.1436	89.3493	94.6343	97.7249	93.0866	94.4682	95.3749		98.5824	95.4869
89.9038	99.0291	102.439	98.3493	95.012	94.8331	98.3236	97.084	89.1476		95.1219	95.1586	101.529	91.1623		88.8217	87.8551	88.5213	93.4098	98.0792		96.8966	90.4682	96.5874	89.2564	96.2514	90.2661		93.9467	89.5602	87.9247	89.7137	91.0668	88.4674	88.7428	89.9584		95.2224	92.472	98.4843	91.5223	89.4414	94.7628	98.0369	93.6515	93.9571	96.0239		98.721	94.6462
87.5102	102.245	101.789	97.0769	92.5337	94.7227	99.8885	97.8762	91.0555		93.2943	94.2432	98.3056	92.0316		87.7406	87.2889	92.5494	92.3666	99.4827		97.6068	87.6103	94.7635	87.7698	94.8596	89.2118		94.2801	89.9321	87.947	90.1443	90.7762	88.8794	88.8964	90.3243		94.7809	91.853	98.6964	91.1446	90.0312	94.7902	97.9905	93.0495	95.0911	96.5828		97.8944	94.3757
89.3553	98.5666	101.644	97.6625	94.8638	94.0188	97.5525	97.6225	88.7882		93.2972	94.1582	97.9619	91.5294		86.9008	87.1233	92.89	92.3713	99.6627		97.3905	87.9356	95.5487	87.9393	95.1396	89.1841		94.8869	89.9155	87.6622	89.9227	90.9924	88.4915	89.1827	91.4451		94.2288	91.9143	98.714	91.4637	89.8544	95.1409	97.4714	93.717	95.3168	96.4186		98.2042	93.8879
89.8778	98.3202	101.711	97.3265	94.8458	94.6779	97.4458	97.0268	89.215		93.421	94.3366	99.1721	91.573		87.6447	86.9663	92.4264	93.0991	99.8174		97.7109	87.2059	95.5955	88.4899	94.8645	89.359		94.819	90.1431	88.2523	90.3224	91.4139	88.3042	89.4058	91.7817		94.6592	91.3534	98.2675	91.3662	89.0803	94.9611	97.9384	93.6833	95.72	96.279		98.6277	93.5578
90.2351	98.7864	102.495	97.2662	95.4092	95.2255	97.3573	96.8726	89.4327		94.2327	94.9996	98.3461	91.5689		86.9538	88.5362	92.572	93.642	99.7631		97.3623	87.9631	95.9729	87.8165	95.1406	89.9936		95.0219	90.2191	88.4466	90.8056	91.0412	89.6069	90.2456	92.517		93.6815	91.1855	98.6956	91.0468	89.4343	95.317	97.916	94.4571	96.4747	97.8112		98.4647	93.5196
89.3537	97.8497	103.083	97.6014	95.1912	95.4824	97.3303	96.9085	89.9663		94.6209	95.6748	98.3752	91.6486		86.2854	87.7183	92.2875	93.3012	99.9836		97.5833	87.8715	96.2569	88.6301	94.8629	90.624		94.6516	90.5009	88.4124	89.8006	91.4033	89.1643	89.964	92.9758		93.9671	90.8911	98.0749	91.8467	89.6928	95.0714	96.9792	94.3924	96.187	97.5456		99.027	92.8418
89.9503	98.7631	102.986	96.5944	95.9402	94.9177	96.7084	97.2687	89.9429		94.4805	94.3667	97.9091	92.0062		87.687	88.6423	92.5293	93.6158	99.7783		97.4171	87.7377	96.7897	89.0055	95.1226	90.4586		95.0313	90.2427	88.3292	90.1217	91.6739	89.7744	89.9706	92.776		93.6154	90.6579	97.709	92.4307	90.2046	95.1932	96.4871	94.8662	96.2473	97.5105		99.6272	93.2116
89.2588	99.0097	102.77	97.3378	96.1105	94.8808	96.9315	97.5773	90.2707		94.6552	95.7917	98.9094	92.0644		93.5021	91.8579	96.2247	91.4404	100.449		97.368	87.5401	97.1163	88.4765	95.7955	90.8391		95.2662	90.8156	88.2406	90.0315	91.8274	89.8898	90.4963	93.9369		93.5633	90.5763	98.3154	92.3227	90.1514	96.2084	96.1954	95.0293	95.7014	97.6147		99.5828	92.0163
89.023	100.939	102.907	97.1797	96.0947	95.5158	97.8884	98.1141	91.2068		94.7097	95.9514	98.4427	92.3472		86.9357	88.7394	92.5574	93.585	100.211		97.8304	87.623	97.695	88.6889	95.0811	90.945		95.0207	91.5736	88.5611	90.9684	92.1691	88.9658	90.0938	93.8538		94.3138	90.2118	97.7997	93.1644	90.4398	96.3164	96.4503	95.4019	95.7833	98.1031		99.1264	92.7112
89.3761	101.477	104.172	96.8592	96.6495	95.6708	97.6742	97.3669	91.6902		94.9768	95.9114	98.3146	92.7111		88.0541	88.3855	92.7153	93.5599	99.7267		98.8078	91.7879	96.6138	91.0009	96.9068	91.8576		95.0443	91.5317	88.7145	90.9992	92.0693	89.7645	90.7471	93.9803		93.4289	90.0495	97.3125	92.6789	90.6148	96.503	95.8872	95.5342	96.3597	97.89		100.004	92.2721
86.7212	103.111	105.724	95.8386	92.5274	95.9272	98.9086	98.1562	95.2753		95.4275	97.1759	99.8416	90.7704		87.7795	88.9652	93.2348	94.1261	100.232		97.9831	87.8087	98.0614	88.8602	95.3332	91.5166		95.1273	92.1514	88.9968	90.5133	91.7403	89.7883	90.9174	94.4319		93.78	89.9905	98.5597	93.251	90.8769	98.1027	93.977	97.1732	97.213	96.1296		98.1431	94.6366
90.7083	98.6491	105.164	96.1636	97.0487	95.7395	96.9848	97.6625	93.2743		95.6058	96.0075	97.5464	93.6278		92.0127	93.0743	93.709	93.3929	99.4932		98.9076	90.7743	99.8026	89.1874	95.9183	93.129		95.6112	92.5545	89.0479	90.4996	92.0431	89.9234	91.8994	94.2516		94.3217	89.4923	97.9434	93.2504	90.7941	96.6245	95.5943	95.7624	96.7565	98.5879		100.668	93.8916
92.511	102.896	108.443	97.3377	94.351	96.9353	99.2436	98.1787	96.2541		95.6006	96.9288	98.3637	90.6064		92.769	92.6724	95.406	93.1756	100.499		98.2391	88.0724	98.9384	89.5609	96.1188	91.8919		95.7935	92.54	89.0159	90.2431	91.915	90.1357	91.245	94.8763		95.905	89.2018	100.011	93.3096	91.898	91.7366	94.5171	96.5284	97.074	96.1601		98.9252	93.6053
88.521	102.344	107.694	96.4439	93.5355	97.4814	97.7206	99.2493	97.5506		95.5939	96.6725	97.294	93.5619		88.4539	89.9573	94.5159	94.1962	100.603		98.7203	90.5056	101.47	89.7244	96.2412	93.6118		94.7302	93.0299	90.1714	87.8668	92.0889	94.5166	93.3604	100.426		93.7304	89.2917	96.7299	92.9034	91.7753	96.6367	95.1678	95.8438	97.0661	99.1815		100.295	92.3399
91.3876	98.9747	105.949	96.5489	97.001	97.0946	96.5574	98.3695	95.5166		96.7186	97.016	97.3466	90.3451		87.7092	90.5272	93.9282	94.0827	100.552		99.8974	88.3292	99.0576	88.6849	96.1181	92.9032		95.9003	93.8957	89.1003	90.197	92.7745	90.7026	91.9431	94.7814		94.9166	88.8956	98.2603	93.4531	92.0995	95.2382	93.7015	97.4985	97.9295	96.5683		98.3178	93.5395
90.6978	99.4263	106.051	96.3877	97.3279	97.2828	95.9014	98.9784	95.9661		95.8002	96.5812	97.0748	93.7463		93.6113	93.0314	97.43	92.5993	101.585		98.9205	90.5167	100.537	89.0686	96.8439	94.45		95.6641	94.399	90.5573	87.4715	91.8127	92.3395	93.3436	100.758		94.3253	88.7398	96.6559	93.2025	91.8754	98.0058	94.7628	96.334	97.9355	99.6665		100.103	92.1396
88.4066	102.133	109.148	96.7905	93.7653	98.7151	98.4011	99.4727	99.3658		96.6552	97.7121	98.6873	91.376		89.7056	90.4096	94.2842	93.7321	101.11		99.5071	93.09	96.6819	92.0254	97.0447	94.3481		95.2894	93.9866	90.7903	87.4421	92.0128	96.1906	94.6246	101.274		93.8798	88.8608	96.7504	93.4257	92.2073	99.6585	92.8055	97.8202	97.8333	96.7255		102.419	93.2325
91.4957	98.6694	106.053	96.5937	97.4445	98.8731	96.6554	99.0136	97.4561		98.3837	96.1601	97.1331	94.305		95.0267	93.2873	98.6134	91.2629	101.696		98.2971	88.8337	101.284	88.6344	96.6736	95.0271		95.6221	94.2423	90.6322	87.9726	91.9789	95.9204	94.3234	101.525		93.7644	88.483	96.3976	93.5507	92.4348	97.512	94.4889	96.3479	97.9515	99.332		100.945	92.3374
88.3909	102.003	107.951	96.4894	93.8091	99.4657	99.0936	99.9627	101.31		97.8186	96.4024	97.3035	94.6306		92.9625	94.9898	95.0699	92.783	100.037		99.9223	93.3582	96.7541	91.6868	98.0697	94.2012		96.7969	94.4821	89.6543	90.734	93.2841	91.6074	93.3166	95.6747		96.3444	88.3524	99.2796	94.2223	93.0836	93.6351	93.1866	97.3844	97.9927	96.8334		100.636	91.3138
91.8892	98.6059	105.73	96.8109	97.3319	98.9819	96.3673	99.0174	98.7644		98.4685	96.4975	97.1775	95.2293		90.5657	91.0021	94.324	93.7567	101.086		99.3744	88.4978	99.1168	89.0756	96.5519	93.9996		96.6577	95.1518	89.5679	90.5252	93.7184	91.5654	93.4467	96.2758		94.3727	88.7029	95.8609	94.1006	92.8358	98.0939	93.9538	96.3717	98.2417	99.2019		101.863	92.0794
88.4283	101.951	106.332	96.5635	93.7042	100.176	97.9516	100.218	101.892		98.5426	96.6772	98.2956	95.3307		88.8185	91.7957	94.8582	93.1517	101.136		99.4893	88.5794	99.2047	89.5932	96.9033	94.2795		96.9868	94.6184	89.5256	90.8546	93.6604	91.4902	94.2647	95.9178		94.0693	88.9646	96.059	93.5564	93.2718	97.7397	93.5271	96.2408	97.6345	99.5671		102.646	91.6295
91.6255	99.3567	107.313	96.6087	98.0234	99.6198	96.7221	99.2796	100.103		100.259	96.8877	98.4273	96.3833		92.664	94.9186	93.0714	93.693	100.057		99.0335	87.798	102.643	89.1386	96.9916	95.578		96.727	95.0654	90.2645	90.942	93.8091	91.582	93.951	96.4297		95.903	88.8366	98.9167	94.478	93.9024	93.1191	92.6852	97.0715	97.4964	96.9495		102.004	91.9878
91.5742	99.7288	106.433	97.0063	97.8844	99.8736	96.9599	100.043	100.222		100.405	97.3778	98.3483	96.3258		91.2974	91.7245	95.8474	94.0061	101.273		99.3147	88.8443	100.135	89.3913	97.2343	94.7656		96.6815	95.678	90.7212	91.2363	94.3328	91.7153	94.3838	96.9496		94.4858	89.094	95.9649	93.4618	92.3979	98.5939	93.4693	96.0648	98.7749	99.4791		102.393	92.0242
92.4654	99.3166	106.284	97.1718	97.3975	99.501	96.1052	100.026	100.671		100.506	97.1282	97.8375	96.441		90.4387	91.839	95.6515	93.3354	101.534		99.4371	89.0087	100.138	89.5387	97.0494	95.0999		97.8506	95.5752	90.2432	90.69	94.3755	91.8275	94.354	97.6007		94.3663	89.3218	95.8055	93.5416	93.1666	99.3983	93.2646	96.7461	98.9145	99.4614		102.049	91.6369
87.1632	97.4	105.531	97.3646	89.56	100.637	97.2345	100.493	103.519		100.295	97.3752	98.0564	96.7083		93.5688	96.8385	95.215	93.3689	99.3625		100.462	89.2635	99.7336	90.138	97.766	95.2855		97.5232	95.9062	90.4406	90.6025	94.2914	92.8289	94.9627	98.1972		94.9223	89.4252	95.7438	94.3128	93.532	99.999	92.9817	96.3771	99.6208	100.294		100.488	93.3362
92.0359	100.25	106.579	97.4231	98.5427	101.076	97.416	100.134	100.739		101.813	97.604	98.4721	97.3615		91.5753	91.6303	96.0803	93.8913	101.144		99.9052	89.2865	100.413	89.1419	98.0112	95.3632		97.8276	96.6274	90.6319	90.8446	94.4307	92.182	95.2012	97.4744		94.8183	89.2452	95.7949	93.6378	93.3849	100.246	92.9806	96.9074	98.8051	100.048		103.882	91.7698
92.6327	99.5832	106.839	97.5447	97.9191	101.589	97.0935	100.269	101.172		101.76	98.3442	97.4187	97.4223		91.3143	91.8111	95.6523	93.94	101.137		100.005	90.0004	100.114	89.7307	98.2372	96.099		97.5359	96.5636	91.2917	91.3902	94.3894	92.162	95.4129	98.8247		95.2219	89.3481	95.4377	93.8864	93.5374	101.056	93.6027	97.2309	99.463	100.393		103.462	92.1848
91.9174	100.574	105.811	97.5822	98.1176	101.519	97.3387	99.7991	101.332		102.59	97.7385	99.3221	97.8264		91.2811	92.6446	95.9184	93.7145	101.223		99.9407	89.2943	99.4083	89.6211	98.3824	96.0959		98.1541	96.8288	91.7266	90.9885	94.7644	92.2921	95.3203	99.2425		96.364	89.3899	96.0721	94.6891	93.7273	100.35	93.1206	97.0967	99.1745	100.218		103.574	92.1229
92.1955	100.306	106.507	97.6639	98.8105	102.252	96.3742	100.086	101.595		102.398	96.7593	98.9397	97.3027		91.0509	93.108	96.0824	93.9868	101.543		100.226	90.283	100.352	89.232	98.664	96.076		97.3438	97.8059	93.3494	88.3879	94.4968	95.6106	96.6846	106.624		94.7745	89.2516	96.377	94.2961	93.834	101.394	93.0882	96.8362	99.6827	99.9476		103.221	92.6632
92.4675	100.548	107.239	98.0192	98.0295	102.991	96.4281	100.206	102.142		103.398	98.009	98.7933	97.8357		90.5675	94.226	97.1235	93.9455	101.784		102.188	95.8772	93.3408	92.9682	99.8391	96.172		97.6455	97.304	91.843	91.5663	94.9106	93.3295	96.2367	100.534		95.2564	89.1038	96.6202	93.9152	94.4301	101.244	93.2553	97.7375	99.9119	100.616		103.222	91.7971
91.2828	104.015	108.707	99.5141	95.4765	104.331	98.8692	100.575	104.922		102.67	97.3881	99.0898	98.0399		91.5946	93.5766	96.5422	94.2104	101.857		101.542	91.2093	99.7141	90.3482	98.6487	96.8296		98.0484	97.985	92.0007	91.2296	95.4726	93.809	96.6408	101.828		96.5087	89.4291	96.3706	94.6624	94.6993	101.395	92.9227	97.394	99.5253	100.054		100.509	93.7495
94.913	104.437	116.373	101.247	96.6947	103.723	99.5174	100.341	106.126		103.638	97.8526	99.589	97.8561		91.4935	93.8959	97.0116	93.6225	102.229		101.503	90.8405	100.212	90.1663	98.5081	96.8573		98.4695	97.4175	91.4231	90.7511	95.3278	93.2063	96.3398	103.312		95.7498	89.619	96.2978	94.7142	94.7647	101.681	92.9267	97.8392	100.518	99.6466		104.072	92.1726
92.2034	104.049	112.537	99.6521	95.7754	104.353	98.5296	101.06	105.511		104.22	98.5473	98.837	98.3361		91.7994	92.6762	96.969	93.9499	101.44		101.776	91.0236	99.9709	90.7457	99.1271	97.0761		98.0742	97.8035	92.2335	91.7946	95.6781	93.4874	96.642	103.299		95.3336	89.4544	96.0787	94.5186	95.1472	101.911	92.4374	97.412	99.7407	100.279		101.446	95.3245
95.3907	103.97	112.444	101.059	95.9984	105.485	99.6165	100.978	106.172		103.739	98.3734	99.6061	97.8139		93.363	97.3717	95.2419	94.8302	100.259		102.317	94.5627	97.9233	91.2141	99.7853	98.9603		98.8634	98.3716	92.455	91.9096	95.8257	93.8535	96.7452	105.22		98.2315	89.3207	99.2425	96.0585	95.7456	96.0252	92.038	98.5782	99.1673	97.3971		104.423	92.1919
[truncated: 20 more columns]

## Sheet: starvation in fbs+ 20200310
3423.52	2569.32	1627.5	2595.55	2672.42	2328.05	2309.69	2761.01		2021.09	2715.52	1886.23	1747.55	4140.11	2907.3	1542.32	2568.88		2996.61	2051.32	2418.26	2092.54	2873.27	1848.96	1946.04	1721.04	2392.85	2647.18	2618.09	1716.8	2550.71		1844.37	2463.44	2058.84	2224.53	3162.51	1602.26		3795.63	2162.66	2679.75	3418.69	1997.89		2886.4	2332.6	2238.88	2212.57	3603.49
3382.36	2538.47	1627.49	2601.03	2657.15	2302.87	2296.65	2742.6		2011.51	2699.15	1858.31	1737.69	4145.99	2869.92	1531.02	2552.56		2987.65	2017.1	2414.66	2081.13	2874.48	1838.14	1944.49	1702.58	2361.38	2618.96	2589.63	1704.25	2548.45		1817.73	2467.82	2033.27	2214.86	3155.49	1599.44		3783.79	2176.1	2673.72	3384.52	1975.6		2865.18	2308.99	2239.22	2190.98	3576.05
3372.8	2543.83	1622.83	2592.13	2647.18	2309.73	2292.13	2739.91		2005.9	2700.53	1864.06	1739.88	4120.93	2866.29	1536.5	2546.35		2944.62	2001.34	2406.23	2084.27	2839.64	1828.79	1940.09	1701.53	2347.01	2587.72	2581.38	1688.71	2507.86		1802.49	2464.48	2004.86	2233.61	3124.51	1610		3777.35	2172.02	2656.42	3339.27	1949.59		2858.02	2299.78	2244.14	2177.86	3571.89
3353.42	2526.55	1620.94	2591.02	2657.42	2298.35	2285.64	2735.31		1995.16	2694.38	1842.24	1746.87	4120.67	2878.21	1527.01	2535.98		2979.75	1989.71	2411.46	2073	2816.43	1808.31	1935.42	1690.24	2335.25	2587.95	2598.32	1692.37	2482.38		1820.76	2475.6	1997.44	2225.78	3098.41	1604.04		3764.38	2178.95	2652.82	3327.84	1952.95		2859.79	2293.92	2239.51	2175.35	3551.52
3352.66	2534.44	1628.26	2596.97	2651.08	2287.55	2281.23	2751.43		1996.65	2709.79	1828.39	1746.58	4125.49	2884.64	1516.19	2534.66		2989.19	1981.47	2397.74	2050.87	2827.4	1823.14	1951.81	1708.95	2333.8	2576.11	2592.21	1689.52	2453.59		1819.02	2471.54	2006.03	2229.47	3060.11	1614.85		3760.28	2176.69	2665.28	3313.59	1952.4		2845.46	2292.98	2235.34	2180.19	3560.98
3363.36	2515.36	1647.85	2632.99	2663.21	2280.77	2279.86	2764.24		1983.87	2714.81	1816.1	1742.55	4123.96	2853.9	1509.89	2522.69		3020.79	1969.58	2401.39	2056.01	2812.75	1809.02	1943.94	1718.3	2320.86	2561.81	2625.25	1709.15	2425.05		1826.12	2462.62	2006.22	2238.97	3022.17	1613.11		3732.22	2184.77	2661.32	3293.11	1946.08		2834.27	2286.48	2237.52	2181.07	3550.05
3360.45	2501.29	1648.42	2633.26	2651.99	2276.69	2296.04	2790.97		1964.9	2775.41	1813.69	1740.28	4137.51	2881.44	1490.87	2519.95		3030.35	1994.51	2396.06	2039.49	2799.37	1794.53	1935.38	1730.16	2340.48	2556.1	2614.88	1700.69	2386.52		1806.92	2458.98	2011.21	2279.69	2964.33	1623.12		3741.12	2200.21	2672.17	3281.13	1941.75
3358.21	2493.94	1660.47	2633.86	2651.26	2270.44	2284.84	2792.39		1956.48	2791.94	1816.98	1748.39	4128.12	2885.07	1464.35	2520.85																1767.1	2398.6	1995.05	2229.04	2903.08	1584.87		3725.09	2198.63	2679.43	3287.36	1935.58
									1934.38	2810.63	1802.22	1736.93	4131.23	2900.87	1468.7	2511.65																1802.24	2452.13	2039.42	2273.26	2947.53	1615.92		3723.9	2187.27	2675.47	3286.86	1930.24		2818.19	2265.4	2234.45	2200.48	3529.38
3385.48	2475.57	1663.2	2665.29	2645.02	2246.72	2291.91	2811.41		1931.91	2824.39	1799.97	1737.72	4133.41	2906.48	1443.44	2483.62		3071.14	1976.01	2385.71	2013.62	2774.65	1780.64	1904.7	1762.45	2325.24	2526.14	2603.84	1712.83	2368.62		1816.47	2453.19	2055.24	2266.21	2919.11	1621.27		3709.9	2189.35	2685.51	3267.76	1924.41		2814.88	2270.14	2240.03	2199.72	3520.92
3372.38	2458.27	1661.35	2672.14	2643.53	2226.96	2285.38	2794.69											3059.08	1955.45	2398.44	2011.65	2767.53	1750.19	1919.13	1753.54	2319.48	2508.78	2616.22	1716.48	2386.49		1800.49	2431.92	2050.38	2277.19	2913.51	1625.22		3707.86	2185.9	2689.77	3256.58	1932.81		2813.04	2270.68	2225.7	2188.76	3502.65
3346.66	2446.65	1669.38	2677.9	2631.78	2205.9	2286.35	2791.13		1911.79	2854.15	1772.45	1733.63	4111.8	2914.85	1432.37	2456.84		3099	1960.24	2399.83	2002.39	2741.51	1737.94	1916.42	1750.28	2323.56	2496.72	2614.44	1702.11	2403.77		1791.42	2426.42	2061.39	2277.16	2899.01	1606.73		3680.97	2167.64	2680.08	3253.3	1934.96		2808.45	2262.49	2205.93	2173.17	3481.23
3374.64	2425.17	1668.54	2672.75	2616.21	2181.49	2289.18	2782.59		1892.82	2842.82	1750.57	1728.31	4091.3	2905.49	1423.17	2462.95		3088.62	1941.73	2391.77	1997.84	2724.05	1728.34	1904.18	1754.62	2319.43	2489.28	2612.43	1706.17	2411.27		1796.87	2420.17	2062.37	2283.7	2902.4	1626.68		3668.36	2143.26	2682.87	3251.54	1937.91		2789.29	2259.85	2223.52	2156.42	3480.14
3347.59	2423.82	1657.01	2698.15	2607.34	2157.08	2272.16	2774.64		1884.39	2865.04	1741.89	1705.06	4083.19	2900.12	1425.18	2455.73		3080.25	1924.41	2386	1987.19	2716.58	1717.53	1912.15	1741.46	2322.73	2481.47	2602.07	1703.43	2427.64		1791.88	2393.74	2061.36	2282.51	2916.31	1612.21		3644.67	2125.48	2704.12	3246.81	1937.88		2782.5	2250.83	2214.25	2154.09	3447.44
3334.37	2417.69	1651.88	2683.75	2576.08	2142.03	2265.04	2767.08		1866.57	2856.92	1732.57	1698.98	4073.82	2878.96	1417.82	2439.95		3100.64	1919.84	2395.13	1977.87	2730.44	1703.48	1908.17	1736.66	2315.69	2471.43	2594.28	1694.73	2438.98		1787.11	2373.4	2065.83	2303.17	2905.69	1620.13		3624.95	2103.12	2693.24	3223.77	1929.43		2762.36	2260.92	2210.66	2152.32	3434.78
3337.94	2399.07	1648.61	2694.66	2578.2	2131.79	2260.35	2755.33		1875.95	2866.16	1714.88	1684.5	4066.83	2871.5	1422.54	2420.9		3112.48	1895.68	2390.71	1970.71	2711.97	1710.82	1906.11	1738.82	2305.03	2455.38	2603.33	1687.9	2437.3		1771.42	2383	2061.27	2295.57	2899.42	1608.95		3598.89	2085.73	2697.15	3227.1	1926.78		2755.78	2275.83	2196.49	2143.96	3404.61
3316.85	2396.44	1618.12	2689.24	2563.57	2144.09	2248.03	2746.28		1858.23	2852.94	1718.11	1657.87	4048.66	2887.26	1423.16	2428.17		3095.42	1898.85	2390.2	1962.09	2698.67	1700.82	1897.97	1714.4	2304.17	2446.43	2591.21	1666.94	2447.89		1770.83	2362.74	2051.66	2284.24	2919.48	1608.7		3569.84	2080.29	2688.58	3215.45	1911.7		2766.13	2269.41	2193.86	2138.03	3389.66
3292.62	2378.64	1617.12	2709.26	2557.27	2118.99	2237.58	2721.55		1863.42	2866.04	1709.09	1647.78	4021.01	2890.7	1423.11	2434.69		3097.61	1905.86	2404.93	1952.71	2695.18	1694.8	1908.72	1726.44	2298.82	2439.65	2582.53	1670.96	2452.43		1752.29	2387	2051.81	2291.82	2938.43	1586.16		3552.09	2058.11	2698.22	3213.12	1908.47		2748.32	2263.1	2191.11	2145.1	3372.74
3302.89	2385.66	1615.08	2690.33	2551.87	2117.31	2232	2726.72		1861.79	2867.59	1717.77	1618.9	4006.9	2874.79	1429.71	2428.3		3119.62	1892.72	2405.06	1952.34	2695.58	1694.76	1902.17	1719.04	2286.87	2442.36	2571.55	1643.95	2455.25		1751.96	2369.42	2053.81	2293.38	2939.05	1601.96		3528.96	2052.45	2694.76	3196.88	1883.36		2730.78	2265.09	2178.77	2137.04	3351.38
3293	2379.53	1599.87	2691.17	2527.43	2109.96	2207.91	2689.96		1864.36	2848.57	1722.27	1614.81	3984.35	2861.25	1434.02	2420.15		3090.22	1880.16	2404.54	1937.91	2689.94	1696.64	1897.06	1714.03	2274.25	2440.11	2558.19	1640.42	2450.6		1754.46	2372.49	2048.46	2297.78	2952.4	1592.84		3519.72	2055.43	2690.82	3211.09	1881.29		2716.48	2256.47	2165.39	2128.72	3340.27
3269.81	2375.06	1602.44	2665.92	2518.57	2125.18	2196.6	2680.92		1862.86	2858.21	1698.95	1600.93	3970.28	2849.22	1429.33	2427.1		3108.16	1903.9	2405.14	1936.61	2687.95	1685.41	1892.79	1719.82	2259.9	2442.11	2546.66	1623.32	2442.5		1735.45	2362.11	2035.48	2314.05	2929.91	1577.64		3475.82	2030.68	2707.72	3192.74	1891.05		2720.17	2258.43	2163.83	2125.39	3312.64
3271.14	2358.85	1584.07	2643.99	2519.31	2109.65	2182.7	2676.6		1853.7	2855.51	1707.41	1591.77	3955.1	2841.16	1430.78	2430.26		3097.39	1887.48	2407.38	1936.73	2695.62	1705.18	1893.66	1716.5	2256.68	2432.62	2524.06	1618.34	2431.47		1737.23	2369.11	2040.39	2328.15	2972.17	1562.02		3467.88	2041.71	2708.18	3203.32	1897.18		2721.51	2258.69	2175.72	2113.85	3317.91
3237.75	2391.93	1559.02	2616.52	2506.61	2107.23	2159.07	2669.02		1863.51	2865.52	1693.78	1584.42	3940.54	2828.76	1440.2	2425.62		3085.48	1878.75	2402.39	1928.6	2687.05	1697.19	1899.43	1707.01	2241.71	2430.21	2531.44	1606.94	2405.4		1751.29	2365.57	2032.89	2335.57	2972.78	1567.91		3466.42	2026.56	2703.12	3199.24	1885.66		2719.61	2244.58	2178.96	2120.67	3308.2
3231.58	2379.79	1570.33	2629.17	2521.74	2110.08	2158.58	2672.22		1847.81	2856.97	1696.28	1592.66	3938.28	2822.71	1422.95	2426.95		3114.04	1902.24	2376.85	1930.78	2711.6	1692.66	1880.57	1713.26	2231.64	2426.89	2507.34	1593.71	2388.18		1720.48	2364.05	2042.98	2338.74	2978.63	1570.48		3457.6	2034.92	2698.57	3206.91	1882.89		2717.7	2250.33	2174.34	2113.37	3285.15
3250.24	2370.61	1576.99	2625.58	2525.03	2112.06	2150.92	2668.64		1859.1	2858.46	1693.01	1590.75	3908.86	2830.37	1424.96	2439.71		3111.68	1875.9	2391.01	1931.86	2700.81	1708.55	1883.35	1712.93	2223.07	2437.95	2502.84	1589.02	2364.25		1733.14	2370.4	2046.2	2338.9	2992.12	1552.88		3452.49	2019.69	2677.36	3204.67	1880.83		2721.82	2254.97	2180.33	2124.69	3284.73
3227.57	2403.01	1570.95	2592.04	2513.28	2119.25	2125.56	2654.82		1864.57	2884.84	1705.54	1586.22	3895.42	2828.09	1440.34	2444.12		3129.79	1872.69	2370.69	1925.48	2700.66	1694.67	1894.33	1703.08	2199.64	2438.61	2504.72	1583.55	2354.73		1712.59	2370.39	2026.02	2356.5	2970.89	1536.01		3454.56	2016.82	2677.61	3219.79	1872.05		2703.98	2247.59	2155.01	2120.52	3271.45
3237.2	2406.11	1572.18	2581.95	2517.77	2128.76	2126.39	2638		1862.48	2892.54	1705.47	1573.31	3894.34	2836.76	1439.74	2435.13		3127.5	1887	2373.09	1913.55	2722.49	1700.72	1885.13	1704.21	2192	2444.8	2489.37	1578.62	2324.71		1724.12	2368.86	2032.83	2351.41	2972.59	1535.16		3430.59	2024.43	2667.04	3216.1	1870.28		2702.04	2237.61	2159.79	2130.47	3305.01
3245.3	2416.12	1579.94	2562.99	2504.25	2114.81	2041.65	2650.42		1874.58	2884.22	1703.05	1571.31	3891.86	2824.12	1440.44	2416.64		3103.36	1887.2	2380.05	1924.69	2730.02	1699.61	1882.11	1718.63	2200.6	2423.79	2483.05	1581.02	2308.84		1722.13	2370.94	2014.73	2360.54	2980.51	1540.04		3436.44	2036.95	2664.15	3221.7	1860.12		2697.7	2228.98	2173.43	2125.7	3293.11
3220.39	2409.91	1574.45	2558.26	2506.49	2133.97	2020.18	2666.3		1884.96	2891.74	1706.33	1565.86	3872.58	2815.52	1431.75	2451.41		3115.56	1872.5	2384.71	1917.64	2720.22	1698.8	1871.24	1733.65	2193.31	2440.37	2482.38	1583.11	2299.82		1726.72	2377.98	2016.95	2370.42	2987.07	1533.34		3436.62	2022.28	2666.39	3230.87	1852.88		2711.3	2229.66	2163.23	2120.03	3299.11
3195.07	2410.51	1582.2	2551.22	2510.86	2118.29	2008.08	2650.81		1864.93	2879.94	1705.91	1566.75	3876.01	2794.14	1447.15	2441.31		3112.55	1876.29	2386.31	1933.47	2730.83	1705.46	1871.5	1731.92	2182.46	2436.29	2501.14	1584.91	2278.86		1725.69	2377.08	2009.42	2376.45	3002.23	1543.83		3446.41	2027.29	2682.01	3235.1	1851.84		2685.63	2227.81	2171.25	2127.84	3299.6
3206.3	2419.54	1575.53	2546.86	2503.33	2130.48	2014.59	2661.49		1895.47	2887.06	1706.53	1567.93	3868.27	2778.82	1447.35	2451.43		3115.3	1875.85	2381.26	1934.36	2738.95	1702.6	1877.1	1736.14	2179.52	2448.48	2486.19	1578.8	2281.18		1725.29	2387.55	2022.28	2372.63	3022.55	1535.07		3438.63	2033.3	2669.25	3239.25	1849.49		2679.06	2237.01	2156.28	2153.96	3296.83
3184.01	2428.91	1576.49	2512.37	2523.73	2121.5	2030.5	2668.92		1883.42	2887.75	1708.05	1569.01	3856.89	2769.58	1448.21	2471.7		3118.63	1882.5	2368.24	1927.34	2747.37	1710.78	1862.51	1742.4	2171.29	2445.06	2496.11	1583.49	2258.81		1729.42	2389.32	2019.31	2376.27	3005.74	1532.58		3459.93	2032.36	2665.86	3251.1	1843.56		2694.02	2236.23	2156.82	2153.02	3321.97
3202.97	2410.15	1589.19	2537.23	2506.88	2127.08	2030.96	2656.25		1891.99	2878.21	1714.66	1570.91	3851.4	2770.93	1450.31	2469.36		3123.98	1879.44	2386.14	1940	2749.01	1711.36	1857.85	1731.95	2177.85	2446.14	2498.88	1584.77	2248.91		1735.01	2386.68	2018.25	2392.32	3020.34	1555.66		3456.63	2022.36	2655.65	3247.81	1841.11		2682.72	2252.02	2151.61	2152.79	3323.16
3201.99	2416.6	1590.3	2524.04	2513.2	2123.82	2031.43	2676.26		1882.53	2874.08	1723.07	1575.84	3832.01	2769.03	1445.3	2480.93		3112.74	1882.79	2367.37	1931.45	2749.64	1700.31	1861.52	1736	2165.04	2456.23	2495.81	1584.8	2248.54		1726.06	2390.22	2027.17	2391.98	3024.09	1562.21		3452.28	2025.47	2673.39	3268.74	1846.35		2678.45	2246	2143.55	2171.78	3317.12
3214.03	2411.67	1580.95	2532.72	2514.11	2124.49	2045.31	2669.82		1883.22	2870.64	1714.19	1570.43	3836.04	2760.25	1446.79	2483.73		3120.68	1889.67	2372.3	1941.12	2765.98	1712.78	1864.48	1732.5	2177.55	2451.22	2489.86	1584.57	2244.02		1723.27	2392.35	2011.05	2394.59	3025.97	1551.01		3465.44	2030.84	2678.11	3269.44	1836		2676.17	2250.33	2134.73	2175.07	3335.65
3228.03	2428.04	1574.85	2519.59	2518.33	2130.23	2045.45	2685.41		1898.67	2890.09	1719.16	1569.48	3838.44	2743.76	1445.29	2486.39		3124.31	1908.42	2380.68	1940.12	2753.59	1719.4	1859.75	1728.92	2185.66	2448.77	2498.06	1587.11	2238.1		1707	2398.42	2024.61	2412.22	3037.15	1549.44		3472.42	2032.87	2672.93	3290.93	1829.87		2687.02	2241.53	2151.37	2178.57	3322.88
3201.02	2439.71	1579.94	2526.69	2524.34	2136.99	2070.27	2696.17		1905.66	2877.91	1736.15	1564.83	3830.2	2756.93	1455.22	2489.63		3138.53	1900.44	2366.62	1950.11	2773.96	1711.8	1850.62	1727.87	2194.01	2460.34	2506.53	1584.79	2233.24		1730.24	2381.1	2032.75	2414.04	3015.66	1559.8		3475.22	2027.06	2685.27	3295.35	1832.83		2693.31	2245.54	2132.51	2195.16	3330.61
3221.83	2432.29	1591.8	2511.64	2538.19	2141.94	2065.84	2692.84		1898.59	2867.13	1721.14	1566.18	3828.32	2734.16	1443.55	2483.6		3138	1903	2378.23	1956.24	2776.37	1727.77	1844.2	1709.39	2194.66	2460.68	2518.6	1586.14	2232.51		1727.4	2383.22	2009.83	2435.66	3022.8	1552.18		3468.85	2030.22	2685.34	3291.76	1821.21		2692.12	2254.88	2128.35	2196.83	3329.66
3224.65	2426.46	1599.12	2528.72	2537.14	2144.93	2074.36	2695.24		1906.14	2865.23	1729.4	1566.51	3824.84	2729.65	1453.53	2478.33		3137.17	1901.42	2369.47	1960.33	2789.54	1722.56	1840.66	1715.65	2187.44	2458.62	2504.11	1586.44	2225.88		1729.29	2388.27	2022.14	2428.89	3054.28	1556.99		3458.63	2017.99	2707.14	3296.11	1828.6		2694.27	2246.15	2107.46	2199.79	3342.38
3209.48	2441.2	1617.16	2535.94	2545.86	2163.34	2079.76	2699.54		1903.33	2853.9	1724.78	1574.35	3828.16	2739.59	1460.92	2498.13		3123.2	1922.27	2368.49	1970.7	2788.91	1725.84	1839.24	1697.04	2194.6	2459.72	2523.79	1591.18	2238.87		1720.16	2392.18	2021.45	2423.05	3045.63	1569.09		3464.95	2036.12	2695.11	3312.05	1821.48		2702	2218.96	2125.25	2205.38	3339.4
3218.91	2435.67	1609.62	2539.13	2546.28	2138.48	2098.04	2713.78		1907.8	2835.78	1745.47	1564.72	3830.97	2738.03	1471.07	2503.76		3144.17	1906.26	2366.34	1948.68	2797.37	1728.34	1850.38	1697.53	2189.63	2467.62	2523.52	1601.36	2227.94		1722.41	2393.29	2021.53	2417.02	3061.69	1570.42		3440.12	2032.06	2700.32	3325.96	1823.65		2693.1	2222.8	2123.95	2224.34	3323.09
3226.26	2463.16	1619.23	2544.57	2539.25	2151.16	2091.95	2721.05		1911.4	2836.86	1730.01	1573.47	3823.62	2722.84	1456.73	2525.95		3114.56	1918.8	2356.74	1963.73	2797.38	1721.91	1845.42	1685.21	2172.5	2464.81	2507.76	1589.08	2244.26		1718.17	2398.95	2022.57	2434.77	3057.1	1563.98		3453.7	2029.8	2713.76	3327.06	1832.19		2689.37	2232.81	2112.05	2230.31	3299.73
3204.08	2456.31	1630.56	2530.8	2561.15	2155.89	2088.18	2719.52		1910.55	2816.98	1736.6	1560.38	3827.1	2730.82	1461.33	2514.25		3125.13	1919.77	2351.05	1960.47	2823.66	1724.9	1842.69	1691.69	2189.48	2472.06	2522.14	1592	2225.49		1707.67	2403.56	2028.21	2434.69	3056.09	1575.52		3452.05	2018.32	2707.42	3313.16	1836.87		2689.49	2224.45	2126.47	2239.16	3347.06
3209.84	2436.65	1618.43	2516.02	2563.39	2154.47	2107.66	2731.64		1924.56	2820.39	1741.59	1580.24	3840.59	2733.8	1472.81	2505.74		3110.14	1930.52	2370.28	1970.43	2806.34	1717.22	1845.49	1696.08	2191.27	2460.52	2515.99	1603.07	2226.42		1722.13	2406.94	2021.11	2443.2	3059.61	1573.29		3461.98	2029.79	2723.46	3311.36	1830.39		2694.78	2234.36	2101.99	2240.88	3331.69
3223.95	2441.68	1628.41	2530.84	2568.61	2141	2103.23	2738.26		1892.94	2829.36	1742.78	1577.14	3832.14	2714.32	1462.78	2531.96		3126.01	1930.17	2366.74	1970.99	2791.57	1732.24	1836.06	1703.47	2187.54	2460.41	2524.56	1595.96	2235.93		1728.23	2414.71	2013.85	2443.26	3060.01	1589.74		3454.88	2047.93	2734.73	3325.33	1828.73		2697.01	2245.05	2127.55	2261.94	3326.01
3223.41	2447.48	1642.29	2528.02	2565.13	2149.93	2102.6	2733.01		1901.33	2831.29	1763.3	1577.39	3844.86	2726.1	1466.17	2517.41		3105.04	1926.25	2378.35	1976.99	2804.98	1732.71	1833.66	1700.66	2199.73	2471.07	2512.22	1602.93	2235.01		1716.55	2396.92	2011.57	2444.7	3059.72	1580.27		3463.99	2038.64	2736.82	3323.92	1833.73		2701.23	2231.47	2126.13	2275	3337.21
3226.11	2442.36	1632.75	2530.52	2591.52	2159.15	2105.93	2740.16		1927.18	2823.2	1755.46	1578.27	3846.75	2729.18	1469.45	2533.5		3102.46	1937.62	2397.56	1977.81	2801.46	1717.24	1828.88	1714.6	2187.55	2470.35	2517.34	1595.08	2249.55		1718.97	2413.77	2008.68	2448.97	3081.75	1579.92		3442.58	2041.97	2744.09	3318.58	1830.69		2710.65	2246.3	2128.4	2290.01	3350.22
3235.41	2452.06	1634.47	2524.74	2570.5	2145.05	2103.14	2743.41		1909.35	2806.47	1754.04	1578.57	3868.39	2724.25	1473.32	2515.19		3095.09	1951.43	2393.98	1993.29	2817.05	1724.86	1836.36	1720.84	2194.74	2486.78	2519.25	1603.52	2251.91		1715.68	2399.54	1995.51	2452.22	3074.23	1578.26		3442.97	2047.27	2749.11	3319.73	1824.76		2709.4	2246.44	2137.08	2277.84	3335.95
3241.1	2438.08	1645.36	2524.7	2566.64	2162.55	2105.31	2739.96		1916.53	2786.65	1747.56	1589.78	3865.73	2739.92	1469.79	2511.64		3097.41	1930.53	2401.84	1986.5	2831.9	1740.6	1837.68	1724.37	2191.77	2477.92	2526.05	1607.08	2248.59		1722.58	2398.36	1998.56	2447.69	3052.93	1587.08		3449.81	2042.05	2755.97	3318.79	1837.96		2717.69	2261.43	2128.18	2277.51	3327.31
3260.04	2436.47	1644.84	2549.22	2576.94	2168.28	2099.39	2753.74		1919.35	2763.16	1765.4	1589.22	3880.48	2741.65	1481.67	2528.58		3068.53	1937.92	2383.13	1982.76	2823.75	1726.35	1843.94	1724.09	2192.43	2487.16	2528.88	1606.11	2252.59		1718.16	2405.73	1985.44	2443.6	3098.18	1584.28		3440.69	2041.72	2744.43	3306.75	1835.99		2753.53	2267.43	2135.4	2292.88	3348.9
3230.14	2450.75	1652.92	2546.94	2589.72	2170.88	2094.24	2747.86		1907.37	2748.64	1755.6	1597.68	3883.68	2732.97	1474.26	2535.26		3095.83	1937.53	2394.09	1985.97	2833.26	1725.93	1834.17	1720.27	2184.4	2489.08	2517.38	1607.69	2265.43		1736.82	2407.47	1989.39	2451.26	3096.73	1595.33		3448.88	2045.35	2761.62	3318.35	1838.69		2729.85	2264.05	2145.5	2303.94	3330.03
3246.4	2428.54	1651.27	2543.34	2596.73	2162.59	2089.31	2764.39		1911.79	2739.52	1767.81	1595.94	3889.56	2716.24	1484.36	2545.62		3091.23	1935.75	2399.29	2001	2846.69	1724.11	1831.83	1717.48	2195.47	2487.88	2531.86	1606.04	2266.64		1733.56	2413.63	1994.51	2443.58	3098.68	1598.29		3451.08	2049.82	2760.3	3332.63	1855.35		2743	2247.83	2155.53	2318.37	3349.92
3250.63	2435.97	1641.82	2551.88	2611.87	2151.9	2107.44	2770.98		1926.26	2713.96	1771.59	1603.4	3885.69	2729.64	1486.38	2547.37		3087.87	1940.14	2411.14	1996.5	2833.34	1730.71	1820.8	1721.31	2185.59	2493.72	2530.64	1612.09	2266.29		1745.94	2421.26	2004.79	2441.05	3112.1	1606.51		3449.56	2060.88	2766.77	3322.71	1836.53		2751.52	2249.3	2129.21	2334.56	3350.54
3257.72	2434.39	1637.36	2545.77	2616.65	2163.98	2089.87	2788.35		1929.47	2707.8	1770.48	1610.38	3861.91	2734.87	1484.42	2560.99		3070.02	1950.41	2415.31	2003.77	2838.79	1727.73	1821.96	1701.76	2198.84	2493.23	2530.97	1614.4	2268.41		1749.04	2431.72	2011.07	2435.46	3116.06	1605.87		3469.9	2049.1	2776.56	3316.26	1840.15		2740.14	2252.12	2148.39	2341.7	3370.22
3258.18	2457.91	1663.11	2553.93	2610.8	2165.98	2102.91	2778.93		1932.75	2699.63	1785.35	1613.9	3870.85	2735.34	1495.32	2570.55		3080.93	1958.97	2417.11	1992.02	2852.97	1750.5	1834.61	1698.85	2203.76	2485.58	2546.05	1620.8	2268		1742.55	2415.65	2033.07	2455.87	3115.25	1608.19		3482.3	2054.91	2772.58	3328.05	1840.16		2755.7	2257.93	2130.08	2363.23	3356.99
3273.32	2441.28	1651.15	2526.66	2618.6	2170.81	2100.7	2779.31		1933.47	2673.58	1774.98	1617.33	3859.05	2731.47	1487.71	2554.91		3087.37	1952.79	2411.42	1995.52	2840.46	1733.65	1826.93	1704.34	2197.87	2484.24	2533.84	1603.99	2265.31		1734.9	2423.44	2019.69	2454.06	3110.77	1612.96		3478.74	2054.59	2793.16	3333.86	1846.7		2778.47	2246.81	2135.25	2378.81	3353.21
3267.07	2443.03	1646.54	2550.18	2615.87	2169.64	2093.21	2793.2		1928.36	2675.15	1793.42	1621	3889.15	2725.64	1488.11	2554.81		3075.9	1944.93	2417.24	1993.57	2841.56	1736.22	1811.2	1704.19	2201.21	2480.61	2531.7	1613.98	2268.24		1727.53	2412.69	2035.95	2442.47	3125.83	1616.36		3488.44	2048.49	2800.09	3314.13	1839.47		2767.12	2265.11	2146.03	2375.87	3369.38
3284.12	2428.62	1656.45	2562.61	2617.9	2168.91	2098.63	2780.09		1911.23	2658.99	1776.3	1620.77	3885.11	2715.57	1489.17	2543.09		3080.19	1962.5	2415.88	2008.37	2850.23	1741.07	1815.1	1708.05	2209.63	2494.6	2541.91	1605.09	2262.44		1743.69	2409.87	2031.68	2481.22	3128.33	1602.29		3497.65	2043.59	2803.15	3313.19	1844.25		2779.59	2264.54	2132.89	2381.42	3379.08
3301.52	2422.1	1647.99	2558.65	2621.7	2150.47	2094.55	2811.19		1935.19	2665.05	1787.16	1606.46	3912.34	2719.64	1491.08	2565.68		3097.22	1961.93	2431.35	2018.26	2859.07	1750.39	1813.01	1713.28	2197.17	2494.21	2549.17	1609.22	2257.58		1716.49	2415.66	2049.74	2447.15	3141.51	1601.28		3498.92	2042.73	2805.68	3308.42	1835.64		2775.92	2288.86	2150.57	2378.2	3397.34
3274.79	2434.68	1663.33	2568.84	2611.97	2160.97	2103.98	2803.37		1905.31	2662.12	1797.04	1599.03	3900.23	2732.79	1519.21	2541.56		3064.09	1965.6	2413.69	2018.27	2857.82	1749.24	1798.85	1701.77	2196.65	2492.58	2529.84	1602.59	2272.21		1736.02	2414.58	2055.22	2462.31	3131.79	1592.06		3486.81	2051	2802.06	3327.45	1846.53		2766.49	2298.51	2149.93	2393.88	3383.98
3283.09	2436.02	1645.17	2560.86	2630.76	2170.7	2097.09	2814.35		1929.31	2657.44	1807.24	1608.57	3909.29	2729.6	1494.39	2541.62		3060.76	1967.23	2428.14	2012.77	2848.14	1736.04	1806.18	1699.93	2208.89	2500.54	2526.61	1608.84	2264.98		1732.6	2410.11	2072.59	2450.78	3150.77	1607.67		3486.84	2048.76	2795.02	3324.84	1844.8		2779.64	2304.06	2145.37	2370.2	3368.28
100	100	100	100	100	100	100	100		100	100	100	100	100	100	100	100		100	100	100	100	100	100	100	100	100	100	100	100	100		100	100	100	100	100	100		100	100	100	100	100		100	100	100	100	100
98.7976	98.7995	99.9997	100.211	99.4286	98.9183	99.4358	99.3329		99.5261	99.3972	98.5199	99.436	100.142	98.7146	99.2675	99.3645		99.7011	98.3321	99.8508	99.4547	100.042	99.4151	99.9204	98.9275	98.6847	98.934	98.9129	99.2686	99.9113		98.5556	100.178	98.7582	99.5654	99.778	99.8237		99.688	100.622	99.7747	99.0007	98.8843		99.2647	98.9875	100.015	99.0243	99.2385
98.5185	99.0082	99.7136	99.8682	99.0553	99.2129	99.2397	99.2355		99.2485	99.4477	98.8247	99.5611	99.5366	98.5894	99.6224	99.1229		98.2653	97.5639	99.5023	99.6047	98.8296	98.9091	99.6942	98.8663	98.0844	97.754	98.5976	98.3637	98.3201		97.7298	100.042	97.3783	100.408	98.7985	100.483		99.5184	100.433	99.1293	97.677	97.5824		99.0165	98.5927	100.235	98.4311	99.1232
97.9523	98.3355	99.5971	99.8257	99.4387	98.7242	98.959	99.0691		98.717	99.2216	97.6677	99.9613	99.5303	98.9996	99.0074	98.7193		99.4376	96.9966	99.7187	99.0662	98.0219	97.8016	99.4544	98.2105	97.5927	97.7625	99.2447	98.577	97.3211		98.7202	100.494	97.0176	100.056	97.9732	100.111		99.1768	100.753	98.9947	97.3426	97.7505		99.0781	98.3415	100.028	98.3176	98.5578
97.9302	98.6425	100.047	100.055	99.2016	98.2601	98.768	99.653		98.791	99.789	96.9336	99.9445	99.6467	99.2207	98.306	98.6678		99.7526	96.5948	99.1513	98.0086	98.4036	98.6036	100.297	99.2974	97.5321	97.3154	99.0114	98.4111	96.1921		98.6256	100.329	97.435	100.222	96.762	100.786		99.0687	100.649	99.46	96.9259	97.723		98.5815	98.3012	99.8419	98.5366	98.8203
98.2427	97.8999	101.251	101.442	99.6553	97.9691	98.7088	100.117		98.1583	99.9736	96.2818	99.7143	99.6098	98.1634	97.8977	98.2018		100.807	96.0153	99.3021	98.2544	97.8939	97.8401	99.8922	99.8407	96.9912	96.7753	100.273	99.5541	95.0734		99.0108	99.9666	97.4441	100.649	95.5625	100.677		98.3296	101.022	99.3121	96.3267	97.4068		98.1938	98.0227	99.9391	98.5762	98.517
98.1577	97.3522	101.285	101.453	99.2353	97.7937	99.4093	101.085		97.2198	102.206	96.1544	99.584	99.9371	99.1108	96.6645	98.0953		101.126	97.2307	99.0816	97.4649	97.4282	97.0564	99.452	100.53	97.8112	96.5595	99.8774	99.0617	93.563		97.9697	99.819	97.6867	102.48	93.7334	101.302		98.5639	101.736	99.717	95.9765	97.1899
98.0924	97.0663	102.026	101.476	99.2081	97.5255	98.9241	101.136		96.8034	102.814	96.3286	100.048	99.7103	99.2357	94.9445	98.1301																95.8107	97.368	96.9016	100.203	91.7967	98.9148		98.1417	101.663	99.9877	96.1585	96.8814
									95.7099	103.502	95.546	99.3925	99.7855	99.7791	95.2268	97.7719																97.7162	99.5408	99.0565	102.191	93.2022	100.853		98.1104	101.138	99.8403	96.144	96.6139		97.6368	97.1191	99.8021	99.4538	97.9435
98.8888	96.3513	102.194	102.687	98.9748	96.5064	99.2304	101.825		95.5878	104.009	95.427	99.4378	99.838	99.9721	93.5888	96.6808		102.487	96.3287	98.6537	96.2285	96.5678	96.3051	97.8755	102.406	97.1743	95.4277	99.4557	99.7686	92.8609		98.4877	99.5837	99.8252	101.874	92.3036	101.187		97.7414	101.234	100.215	95.5852	96.3221		97.522	97.3221	100.051	99.419	97.7087
98.5062	95.6779	102.08	102.951	98.9187	95.6576	98.9476	101.22											102.085	95.3264	99.1804	96.1346	96.3198	94.6583	98.6171	101.888	96.9338	94.7719	99.9286	99.9812	93.5617		97.6212	98.7206	99.5889	102.367	92.1264	101.433		97.6878	101.075	100.374	95.2582	96.7425		97.4582	97.3454	99.4116	98.9238	97.2015
97.755	95.2257	102.574	103.173	98.4794	94.7532	98.9895	101.091		94.5922	105.105	93.9677	99.2037	99.3162	100.26	92.8709	95.6384		103.417	95.5602	99.2375	95.6921	95.4144	93.9956	98.4779	101.699	97.1042	94.3163	99.8603	99.144	94.2393		97.1292	98.4971	100.124	102.366	91.668	100.279		96.9794	100.23	100.012	95.1624	96.8503		97.2992	96.994	98.5282	98.2191	96.6073
98.5722	94.3896	102.522	102.974	97.8966	93.7044	99.1122	100.781		93.6534	104.688	92.808	98.899	98.8209	99.9378	92.2745	95.8765		103.071	94.6575	98.9044	95.4746	94.8066	93.4767	97.8489	101.951	96.9315	94.0355	99.7836	99.3807	94.533		97.4249	98.2435	100.172	102.66	91.7751	101.524		96.6469	99.1029	100.116	95.1107	96.9979		96.6356	96.8811	99.314	97.4621	96.5769
97.7821	94.337	101.814	103.953	97.5647	92.6562	98.3753	100.493		93.2363	105.506	92.3478	97.5689	98.625	99.7531	92.4053	95.5954		102.791	93.8133	98.6657	94.9655	94.5465	92.8921	98.2583	101.186	97.0695	93.7401	99.3882	99.2213	95.175		97.1544	97.1707	100.122	102.606	92.215	100.621		96.0228	98.2808	100.909	94.9723	96.9962		96.4004	96.4941	98.9	97.3571	95.6694
97.3959	94.0984	101.498	103.398	96.3949	92.0096	98.0669	100.22		92.3547	105.207	91.8537	97.2207	98.3988	99.0252	91.9278	94.981		103.472	93.5905	99.0433	94.5203	95.0292	92.1317	98.0538	100.907	96.7754	93.3611	99.0905	98.7141	95.6195		96.8955	96.345	100.339	103.535	91.8791	101.115		95.5035	97.2467	100.503	94.2985	96.5733		95.7026	96.927	98.7398	97.2767	95.3182
97.5001	93.374	101.297	103.819	96.4744	91.5696	97.864	99.7942		92.8186	105.547	90.9159	96.3922	98.2299	98.7687	92.2338	94.2395		103.867	92.4126	98.8605	94.1782	94.3862	92.5292	97.9482	101.033	96.3301	92.7548	99.4361	98.3166	95.5537		96.0452	96.7348	100.118	103.194	91.6808	100.418		94.8168	96.443	100.649	94.3959	96.4408		95.4746	97.5662	98.1068	96.8993	94.481
96.8843	93.2716	99.424	103.61	95.927	92.0981	97.3307	99.4665		91.9421	105.06	91.0867	94.8683	97.791	99.3108	92.2739	94.5226		103.298	92.5673	98.8396	93.7663	93.9234	91.9884	97.5296	99.614	96.294	92.4166	98.973	97.0953	95.9689		96.0127	95.9122	99.6512	102.684	92.3153	100.402		94.0513	96.1915	100.329	94.0552	95.6862		95.833	97.2909	97.9894	96.6309	94.066
96.1764	92.5788	99.3622	104.381	95.691	91.0197	96.8781	98.5708		92.1988	105.543	90.6089	94.291	97.1232	99.4293	92.2709	94.7761		103.371	92.9089	99.4484	93.3176	93.8018	91.6626	98.0821	100.314	96.0704	92.1605	98.6415	97.3297	96.1468		95.0077	96.8971	99.6583	103.025	92.9145	98.9954		93.5839	95.1657	100.689	93.9871	95.5243		95.2159	97.0203	97.8665	96.9508	93.5967
96.4763	92.8517	99.2371	103.652	95.4891	90.9476	96.6367	98.7578		92.118	105.6	91.0687	92.6385	96.7824	98.882	92.6985	94.5274		104.105	92.2685	99.4542	93.3	93.8159	91.6606	97.7457	99.8838	95.571	92.2627	98.2223	95.7566	96.2575		94.9899	96.1835	99.7557	103.095	92.9342	99.9812		92.9745	94.9039	100.56	93.5119	94.2676		94.6086	97.1056	97.3154	96.5864	93.0039
96.1876	92.6132	98.3028	103.684	94.5745	90.6318	95.5933	97.4265		92.2452	104.899	91.3075	92.4042	96.2376	98.4161	92.9784	94.2101		103.124	91.6561	99.4326	92.6103	93.6194	91.7621	97.4832	99.5928	95.0435	92.1779	97.7121	95.5507	96.075		95.1253	96.3081	99.4957	103.293	93.3562	99.412		92.7309	95.0416	100.413	93.9277	94.1637		94.1129	96.7359	96.7178	96.2105	92.6956
95.5102	92.4392	98.4608	102.711	94.2429	91.2857	95.1039	97.0989		92.1712	105.255	90.071	91.6103	95.8978	98.0026	92.674	94.4808		103.723	92.8136	99.4574	92.5483	93.5503	91.1548	97.2638	99.9288	94.4437	92.2534	97.2716	94.5548	95.7576		94.0949	95.8866	98.8653	104.024	92.645	98.4634		91.5745	93.8971	101.043	93.3908	94.6522		94.2409	96.8199	96.6478	96.0597	91.9287
95.5491	91.8084	97.3319	101.866	94.2709	90.6188	94.502	96.9427		91.718	105.155	90.5198	91.0857	95.5313	97.7253	92.7681	94.6037		103.363	92.013	99.5499	92.5542	93.8172	92.2241	97.3081	99.7359	94.3091	91.895	96.4084	94.2647	95.3251		94.191	96.1708	99.1037	104.658	93.9813	97.4883		91.3651	94.4072	101.061	93.7003	94.9593		94.2873	96.8314	97.1788	95.5384	92.0749
94.5737	93.0957	95.7929	100.808	93.7956	90.5147	93.4791	96.6681		92.2031	105.524	89.7972	90.6656	95.1795	97.2986	93.3791	94.4233		102.966	91.5876	99.3435	92.1655	93.5189	91.7918	97.6048	99.1848	93.6838	91.8037	96.6902	93.6008	94.3029		94.9536	96.0271	98.7396	104.992	94.0006	97.8564		91.3268	93.707	100.872	93.581	94.3827		94.2215	96.2262	97.3236	95.8463	91.8054
94.3936	92.6235	96.4873	101.295	94.3616	90.637	93.4578	96.784		91.4263	105.209	89.9294	91.1371	95.125	97.0905	92.2603	94.475		103.919	92.7326	98.2873	92.2698	94.3735	91.5469	96.6354	99.5477	93.2627	91.6786	95.7698	92.8299	93.628		93.2828	95.9654	99.2294	105.134	94.1857	98.0168		91.0944	94.0933	100.702	93.8053	94.244		94.1551	96.4729	97.1174	95.5165	91.1659
94.9385	92.2662	96.8969	101.157	94.4846	90.7222	93.126	96.6542		91.9852	105.264	89.756	91.0278	94.4143	97.3541	92.3907	94.9716		103.84	91.4487	98.8731	92.3215	93.9977	92.4061	96.7786	99.5285	92.9046	92.0961	95.5977	92.557	92.6896		93.9693	96.2231	99.386	105.142	94.6123	96.9184		90.9597	93.3892	99.9108	93.7399	94.1408		94.2981	96.6718	97.385	96.0283	91.1541
94.2764	93.5272	96.5258	99.8648	94.0451	91.0309	92.0279	96.1537		92.2559	106.235	90.4205	90.7686	94.0896	97.2757	93.3879	95.1432		104.445	91.2922	98.0329	92.0165	93.9926	91.6554	97.3427	98.9562	91.9255	92.1214	95.6696	92.2384	92.3165		92.855	96.2228	98.406	105.933	93.9408	95.8651		91.0142	93.2564	99.9199	94.182	93.7012		93.68	96.3553	96.254	95.8398	90.7856
94.5576	93.6477	96.6012	99.4761	94.213	91.4394	92.0641	95.5445		92.1523	106.519	90.4167	90.0294	94.0635	97.5737	93.3488	94.7935		104.368	91.9895	98.1321	91.4464	94.7523	91.9825	96.8698	99.0221	91.6062	92.3552	95.0835	91.9511	91.1396		93.4803	96.1605	98.7366	105.704	93.9947	95.8121		90.3827	93.6083	99.5254	94.0741	93.613		93.6127	95.9274	96.4675	96.2895	91.7169
94.7942	94.0374	97.0781	98.7455	93.7073	90.8405	88.395	95.9946		92.7508	106.212	90.2885	89.9153	94.0037	97.1389	93.3945	94.0737		103.562	91.9995	98.4197	91.9788	95.0145	91.9229	96.7145	99.86	91.9655	91.5615	94.842	92.0908	90.5174		93.3724	96.2452	97.8576	106.114	94.2451	96.1167		90.5369	94.1873	99.4176	94.238	93.1045		93.4623	95.5575	97.0769	96.0738	91.3866
94.0666	93.7957	96.7408	98.5633	93.7911	91.6634	87.4657	96.5696		93.2646	106.489	90.4624	89.6032	93.538	96.8432	92.8312	95.4271		103.97	91.2828	98.6126	91.6421	94.6735	91.8787	96.1562	100.733	91.6611	92.1878	94.8164	92.2128	90.1639		93.6211	96.5308	97.9653	106.558	94.4525	95.6989		90.5416	93.5091	99.5014	94.5063	92.742		93.9337	95.5865	96.6213	95.8177	91.5533
93.3269	93.8189	97.217	98.292	93.9545	90.9899	86.9415	96.0085		92.2736	106.055	90.4403	89.6544	93.621	96.1079	93.8298	95.0341		103.869	91.4675	98.6784	92.3984	95.0427	92.2392	96.1697	100.632	91.2074	92.0335	95.5327	92.3174	89.342		93.5653	96.4942	97.5995	106.829	94.9318	96.3535		90.7996	93.7407	100.084	94.6299	92.6899		93.0441	95.5072	96.9795	96.1705	91.5668
93.6551	94.1707	96.8072	98.1241	93.6726	91.5135	87.2236	96.3955		93.7844	106.317	90.4733	89.722	93.4338	95.581	93.8423	95.428		103.961	91.446	98.47	92.4409	95.3253	92.0843	96.4573	100.877	91.0845	92.4941	94.962	91.9614	89.4328		93.5438	96.9192	98.2243	106.658	95.5743	95.8069		90.5946	94.0182	99.6079	94.7514	92.5724		92.8166	95.9017	96.3108	97.351	91.49
93.0039	94.5353	96.8659	96.7952	94.4361	91.1277	87.9124	96.6646		93.1883	106.342	90.5535	89.7836	93.1591	95.263	93.8984	96.2168		104.072	91.7702	97.9314	92.1056	95.6184	92.5268	95.7077	101.241	90.7408	92.365	95.3407	92.2347	88.5558		93.7677	96.991	98.0801	106.822	95.0429	95.6515		91.1558	93.9752	99.4814	95.098	92.2755		93.335	95.8684	96.3349	97.3087	92.1875
93.5579	93.8049	97.6466	97.753	93.8055	91.3672	87.9323	96.2057		93.6122	105.991	90.9042	89.8923	93.0265	95.3096	94.0346	96.1258		104.251	91.6212	98.6716	92.7104	95.6754	92.5582	95.4683	100.634	91.015	92.4056	95.4466	92.3093	88.1679		94.0706	96.8841	98.0285	107.543	95.5045	97.0918		91.0686	93.5125	99.1005	95.0017	92.153		92.9434	96.5453	96.102	97.2982	92.2208
93.5291	94.0562	97.7146	97.2449	94.0422	91.2272	87.9528	96.9304		93.1444	105.839	91.3501	90.1745	92.558	95.2443	93.7094	96.5762		103.875	91.7845	97.8954	92.3018	95.6971	91.9603	95.6568	100.869	90.4795	92.7867	95.3292	92.3112	88.1535		93.5853	97.0277	98.4618	107.528	95.6232	97.5002		90.9542	93.6566	99.7624	95.6138	92.4152		92.7955	96.2874	95.7421	98.1563	92.0531
93.8807	93.8644	97.1403	97.5793	94.0762	91.2562	88.5535	96.6969		93.1785	105.712	90.8793	89.8648	92.6555	94.9421	93.8059	96.6852		104.141	92.1198	98.0993	92.7641	96.2661	92.6351	95.809	100.666	91.0024	92.5975	95.1022	92.2979	87.9762		93.4341	97.114	97.6788	107.645	95.6825	96.8012		91.3008	93.9047	99.9385	95.6344	91.8971		92.7164	96.4727	95.3481	98.305	92.5672
94.2899	94.5015	96.7655	97.0733	94.234	91.5029	88.5596	97.2617		93.9427	106.428	91.1424	89.8103	92.7134	94.3751	93.7091	96.7889		104.262	93.0338	98.4458	92.716	95.8347	92.9931	95.5659	100.458	91.3412	92.5051	95.4152	92.4458	87.7439		92.5523	97.3607	98.3374	108.437	96.036	96.7035		91.4848	93.9986	99.7453	96.2631	91.5902		93.0922	96.0955	96.0916	98.4632	92.2129
93.5009	94.9556	97.078	97.3469	94.4591	91.793	89.6344	97.6513		94.289	105.98	92.0433	89.5444	92.5144	94.8279	94.3526	96.9148		104.736	92.6448	97.8646	93.1936	96.5436	92.5819	95.0968	100.397	91.6901	92.9422	95.7387	92.3108	87.5536		93.8119	96.6576	98.7326	108.519	95.3567	97.3499		91.5586	93.7299	100.206	96.3923	91.7384		93.3102	96.2677	95.2492	99.2132	92.4273
94.1085	94.6667	97.807	96.7672	94.9773	92.0056	89.4425	97.5309		93.9391	105.583	91.2474	89.6217	92.4689	94.045	93.5961	96.68		104.719	92.7694	98.3447	93.4867	96.6277	93.4455	94.7665	99.3231	91.7172	92.9548	96.1998	92.3891	87.5249		93.6583	96.7434	97.6194	109.491	95.5822	96.8744		91.3906	93.8759	100.209	96.2872	91.1567		93.269	96.6679	95.0631	99.2886	92.401
94.1909	94.4399	98.2568	97.4251	94.9378	92.1339	89.8112	97.6176		94.3124	105.513	91.6857	89.6403	92.3849	93.8898	94.2428	96.4751		104.691	92.6927	97.9823	93.6818	97.0858	93.1639	94.5846	99.6869	91.4157	92.877	95.6464	92.4066	87.2651		93.7605	96.9484	98.2172	109.187	96.5777	97.1744		91.1215	93.3103	101.022	96.4145	91.5268		93.3435	96.2935	94.13	99.4225	92.7539
93.7479	95.0135	99.3651	97.7033	95.2643	92.9251	90.0453	97.7736		94.1733	105.096	91.4405	90.0894	92.4651	94.2316	94.7221	97.2459		104.224	93.7089	97.9418	94.1774	97.0641	93.3412	94.5119	98.6054	91.715	92.9188	96.398	92.6826	87.7741		93.2659	97.1072	98.1836	108.924	96.3043	97.9301		91.2879	94.149	100.573	96.8807	91.1704		93.6114	95.1279	94.9248	99.675	92.6713
94.0233	94.7984	98.9014	97.8262	95.2799	91.8569	90.8366	98.2893		94.3945	104.429	92.5376	89.538	92.533	94.1778	95.3803	97.4649		104.924	92.9286	97.8529	93.125	97.3586	93.4763	95.0843	98.6338	91.507	93.2172	96.3876	93.2758	87.3456		93.3875	97.1525	98.1875	108.653	96.812	98.0131		90.6338	93.9613	100.767	97.2877	91.2786		93.3031	95.2924	94.8666	100.532	92.2187
94.2382	95.8682	99.4922	98.0359	95.017	92.4017	90.5727	98.5525		94.5727	104.468	91.7177	90.039	92.3554	93.6555	94.4503	98.3289		103.936	93.54	97.4557	93.8445	97.3589	93.1285	94.8294	97.9181	90.7913	93.1108	95.7859	92.5607	87.9855		93.1578	97.382	98.2383	109.451	96.6667	97.6111		90.9916	93.8565	101.269	97.3199	91.7061		93.1736	95.7217	94.3351	100.802	91.5705
93.5903	95.6017	100.188	97.5054	95.8364	92.6049	90.4098	98.4972		94.5308	103.736	92.0673	89.2895	92.4395	93.9298	94.7487	97.8731		104.289	93.5872	97.2206	93.6888	98.2736	93.2906	94.6892	98.2944	91.5008	93.3848	96.3352	92.7304	87.2497		92.5885	97.5693	98.512	109.447	96.6348	98.3308		90.9481	93.3256	101.032	96.9132	91.9406		93.1781	95.3633	94.9791	101.202	92.8838
93.7585	94.8365	99.4429	96.936	95.92	92.5441	91.2531	98.9361		95.224	103.862	92.3319	90.4264	92.7652	94.0325	95.4932	97.5421		103.789	94.1114	98.0159	94.1644	97.6708	92.8753	94.8331	98.5497	91.5756	92.9491	96.1	93.3751	87.2862		93.3724	97.7065	98.1675	109.83	96.7462	98.1918		91.2096	93.8564	101.631	96.8605	91.6164		93.3613	95.7882	93.8858	101.279	92.4575
94.1706	95.0323	100.056	97.5069	96.1155	91.9655	91.0613	99.1759		93.6593	104.192	92.3946	90.2486	92.5613	93.3625	94.843	98.5627		104.318	94.0943	97.8694	94.1912	97.1566	93.6873	94.3484	98.9788	91.4196	92.9447	96.4273	92.9611	87.6588		93.703	98.0219	97.8149	109.833	96.7588	99.2186		91.0227	94.6947	102.052	97.2692	91.5333		93.4385	96.2464	95.0274	102.231	92.2998
94.155	95.2579	100.909	97.3982	95.9852	92.3491	91.034	98.9857		94.0745	104.263	93.4828	90.2631	92.8684	93.7676	95.0624	97.9962		103.619	93.9032	98.3496	94.4779	97.6234	93.7129	94.2252	98.8161	91.9292	93.3475	95.9562	93.3674	87.623		93.0699	97.2996	97.7041	109.897	96.7496	98.6276		91.2626	94.2653	102.13	97.2279	91.7835		93.5846	95.6645	94.9639	102.822	92.6106
94.2336	95.0589	100.323	97.4947	96.9728	92.7451	91.1783	99.2446		95.3534	103.965	93.0672	90.3134	92.9142	93.8737	95.2753	98.6226		103.532	94.4575	99.1437	94.5171	97.5006	92.8762	93.9792	99.6255	91.4201	93.3204	96.1515	92.9102	88.1929		93.2011	97.9837	97.5634	110.089	97.4464	98.6056		90.6985	94.4192	102.401	97.0719	91.631		93.911	96.3	95.0653	103.5	92.9717
94.5054	95.4362	100.429	97.2719	96.1861	92.1395	91.0575	99.3622		94.4715	103.349	92.992	90.3307	93.4368	93.7038	95.526	97.9097		103.286	95.1306	98.9956	95.2573	98.0434	93.2884	94.364	99.9883	91.7208	93.9409	96.2247	93.4017	88.2853		93.0227	97.406	96.9239	110.235	97.2086	98.5022		90.7089	94.6645	102.588	97.1054	91.3346		93.8675	96.3059	95.4531	102.95	92.5755
94.6716	94.892	101.097	97.2703	96.0419	92.8909	91.1512	99.2374		94.8266	102.619	92.648	90.9723	93.3725	94.2428	95.2973	97.7715		103.364	94.1117	99.3209	94.9327	98.5601	94.1394	94.4316	100.193	91.5965	93.6061	96.4843	93.6087	88.1552		93.3966	97.3583	97.0723	110.032	96.535	99.0526		90.8891	94.423	102.844	97.0778	91.9949		94.155	96.9488	95.0557	102.935	92.3359
95.2247	94.8295	101.066	98.2149	96.427	93.1373	90.8951	99.7365		94.9663	101.754	93.5941	90.9402	93.7288	94.3024	96.0678	98.4312		102.4	94.472	98.547	94.7539	98.2765	93.3688	94.7532	100.177	91.6243	93.9552	96.5924	93.5526	88.3119		93.1572	97.6573	96.4348	109.848	97.9657	98.878		90.6488	94.4079	102.413	96.7258	91.8963		95.3965	97.2059	95.3782	103.63	92.9351
94.3515	95.3854	101.562	98.1272	96.9054	93.2487	90.6723	99.5237		94.3736	101.22	93.0742	91.4242	93.8061	94.0039	95.5869	98.691		103.311	94.4527	99.0005	94.9074	98.6076	93.3461	94.2512	99.9551	91.2885	94.0278	96.1533	93.6444	88.8155		94.1687	97.728	96.6267	110.193	97.9199	99.5676		90.8645	94.5758	103.055	97.0651	92.0315		94.5763	97.061	95.8293	104.13	92.4114
94.8264	94.5208	101.461	97.9887	97.1676	92.8929	90.4585	100.122		94.5922	100.884	93.722	91.3246	93.9481	93.4284	96.242	99.0944		103.158	94.3663	99.2155	95.6256	99.075	93.2475	94.1313	99.7934	91.751	93.9823	96.7062	93.5486	88.8628		93.992	97.9778	96.8754	109.847	97.9818	99.752		90.9224	94.7824	103.006	97.4827	92.8655		95.0319	96.3657	96.2771	104.782	92.9633
94.95	94.81	100.88	98.3175	97.734	92.4334	91.2438	100.361		95.3079	99.9424	93.9221	91.7514	93.8545	93.8892	96.3734	99.1627		103.046	94.5802	99.7054	95.4103	98.6104	93.605	93.5644	100.016	91.3385	94.2029	96.6595	93.9008	88.8491		94.6636	98.2877	97.3745	109.733	98.406	100.266		90.8826	95.2939	103.247	97.1927	91.9237		95.3268	96.4288	95.1017	105.514	92.9804
95.1569	94.7484	100.606	98.082	97.9132	92.9526	90.483	100.99		95.4669	99.7156	93.8635	92.1509	93.2802	94.0693	96.2461	99.6929		102.45	95.0808	99.8777	95.7579	98.8001	93.4433	93.624	98.8798	91.892	94.1846	96.6724	94.0354	88.9323		94.8316	98.7124	97.6795	109.482	98.5313	100.225		91.4184	94.7489	103.612	97.0039	92.1047		94.9328	96.5495	95.9583	105.836	93.5265
95.1704	95.6641	102.188	98.3966	97.6942	93.0384	91.0477	100.649		95.6294	99.4146	94.6518	92.3522	93.4961	94.0854	96.9526	100.065		102.814	95.4982	99.9524	95.1962	99.2934	94.6748	94.274	98.7106	92.0977	93.8956	97.2484	94.4082	88.9164		94.4795	98.0601	98.7483	110.399	98.5057	100.37		91.7449	95.0179	103.464	97.3488	92.1053		95.4719	96.7987	95.1407	106.809	93.1596
95.6128	95.0168	101.454	97.3459	97.9861	93.2457	90.9519	100.663		95.665	98.4556	94.102	92.5488	93.2113	93.9522	96.4593	99.456		103.029	95.1968	99.7171	95.3639	98.858	93.7638	93.8793	99.0295	91.8515	93.8449	96.7818	93.4288	88.8108		94.0647	98.3761	98.0982	110.318	98.3638	100.668		91.6513	95.0029	104.232	97.5187	92.4327		96.2606	96.322	95.3714	107.513	93.0547
95.43	95.0846	101.17	98.2522	97.884	93.1956	90.6275	101.166		95.4121	98.5131	95.0798	92.7583	93.9383	93.7518	96.4851	99.452		102.646	94.8137	99.9576	95.2707	98.8966	93.9029	93.0711	99.021	91.9912	93.7078	96.7003	94.0111	88.9257		93.665	97.9398	98.8882	109.797	98.8401	100.88		91.9068	94.7211	104.49	96.9417	92.0709		95.8676	97.1063	95.8528	107.381	93.5032
95.9282	94.524	101.779	98.731	97.9599	93.1641	90.8621	100.691		94.5644	97.9181	94.1721	92.7455	93.8406	93.4054	96.5538	98.9958		102.789	95.6702	99.9014	95.9776	99.198	94.1653	93.2715	99.2449	92.343	94.2364	97.09	93.493	88.6982		94.5412	97.8252	98.681	111.539	98.9192	100.002		92.1495	94.4943	104.605	96.9142	92.31		96.2996	97.082	95.2659	107.631	93.7723
96.4363	94.2701	101.259	98.5784	98.102	92.3719	90.6856	101.817		95.7498	98.1414	94.7479	91.9266	94.4984	93.5454	96.6777	99.8754		103.358	95.6425	100.541	96.4506	99.5057	94.6691	93.1639	99.5488	91.8222	94.2215	97.3675	93.7333	88.5076		93.0667	98.0605	99.5579	110.008	99.3359	99.9386		92.1828	94.4547	104.699	96.7747	91.879		96.1722	98.1246	96.0556	107.486	94.2793
95.6556	94.7599	102.202	98.9711	97.7378	92.823	91.0936	101.534		94.2717	98.0336	95.2715	91.5014	94.2058	93.9975	98.502	98.9365		102.252	95.8211	99.8108	96.451	99.4622	94.6068	92.4363	98.8802	91.8007	94.1599	96.629	93.3474	89.0815		94.1258	98.0167	99.8241	110.689	99.0286	99.3636		91.8639	94.8371	104.564	97.3314	92.424		95.8454	98.5382	96.0271	108.195	93.9085
95.8981	94.8121	101.086	98.6637	98.4409	93.2413	90.7955	101.932		95.4592	97.861	95.8121	92.0472	94.4247	93.8879	96.8922	98.9387		102.141	95.901	100.408	96.1881	99.1254	93.8929	92.8128	98.7733	92.3121	94.4606	96.5057	93.7115	88.7981		93.9404	97.835	100.668	110.171	99.6288	100.338		91.8646	94.7333	104.301	97.2548	92.3374		96.3012	98.7764	95.8237	107.124	93.4726
[truncated: 29 more columns]

## Sheet: dAdV
dV/dt	dA/dt		A(20 min)
-5.55337	21.365
-3.57029	13.7912		275.825
0.0698724	12.0439		240.878
-6.99115	32.5487		650.975
-14.8065	20.354		407.08
-15.0252	24.4466		488.933
-1.51553	18.9187		378.375
5.41115	4.31105		86.221
-10.9582	30.8587		617.173
-7.37974	20.7337		414.673
-1.46939	18.5703		371.406
-2.92381	16.459		329.18
-3.57648	3.7286		74.572
-6.21021	22.2886		445.771
-15.3617	32.8972		657.944
-8.81342	17.5926		351.853
-12.3637	30.271		605.42
-5.44404	14.5609		291.218
0.201114	3.7234		74.468
-3.29821	19.3139		386.279
-8.1775	25.9392		518.783
-2.31249	16.9218		338.436
-22.9984	28.1441		562.882
-12.0319	24.0358		480.717
3.30413	11.4459		228.918
-4.3565	28.8409		576.819
1.30272	27.1456		542.913
11.7188	18.7523		375.047
-9.46889	17.6343		352.685
-4.71087	29.9694		599.388
-4.95345	12.7564		255.127
-2.19424	18.9656		379.311
-5.10912	13.6144		272.288
-9.01442	24.2075		484.149
-14.7584	62.461		1249.22
-13.1936	23.3858		467.716
-3.13904	21.8205		436.41
-7.99039	23.443		468.86
2.0708	14.5869		291.738
-12.0861	18.5755		371.51
-10.1902	44.7435		894.87
2.23771	3.86385		77.277
-8.57377	18.6587		373.174
-11.767	19.2411		384.823
-2.04753	4.23825		84.765
-18.3843	23.0166		460.332
-15.9062	36.8286		736.572
-18.3289	33.3392		666.784
-18.7215	48.4409		968.818
-14.0873	18.7315		374.631
-18.8469	32.2888		645.775
-18.1297	28.8462		576.923
-9.84795	25.7935		515.871
1.40514	42.9806		859.612
-6.52228	12.9176		258.352
-3.15639	3.1566		63.132
-7.41677	23.4638		469.276
0.870958	3.3282		66.564
-6.20538	13.6716		273.432
-3.27622	14.6337		292.674
14.6299	4.11345		82.269
-9.56203	34.5717		691.434
-6.66212	14.7949		295.898
-12.2488	21.4045		428.09
-0.147667	13.4324		268.648
3.95055	45.5964		911.927
-11.3493	25.5648		511.295
-3.04203	10.8166		216.333
0.268297	41.3373		826.746
9.04779	24.2127		484.253
0.800038	29.1945		583.891
-3.118	5.0235		100.47
2.48812	10.3382		206.764
-2.9933	11.4927		229.854
3.82655	31.9039		638.078
-4.76014	14.3476		286.953
-7.54611	16.5266		330.532
-6.84279	13.0112		260.224
0.893739	7.21805		144.361
-1.44608	4.7011		94.022
-14.0311	32.7515		655.031
5.4467	39.7772		795.544
3.18346	40.318		806.36
-1.84726	23.3234		466.468
-9.16221	29.4649		589.299
-12.8972	17.1039		342.077
10.508	10.1406		202.812
-28.8256	62.435		1248.7
-4.60093	25.3463		506.926
-6.0274	33.7812		675.625
-7.45577	5.68915		113.783
-3.64379	4.7063		94.126
-10.7109	22.2106		444.211
-7.50552	17.9307		358.614
8.44619	11.8827		237.654
-4.45194	19.2203		384.407
-0.57736	16.459		329.18
2.83614	4.04585		80.917
-10.0817	25.3411		506.822

## Sheet: average
control (n=99)	100	0	99		starvation, spreading in fbs- (n=61)	100	0	61		starvation, spreading in fbs+ (n=71)	100	0	71		0
	99.598	1.10559				99.5757	1.37036				99.4972	0.569201			1
	99.624	2.13085				99.6513	2.10786				99.157	0.835842			2
	99.5258	2.46147				99.3005	2.8739				99.092	1.10702			3
	99.4385	2.89382				99.1138	3.49559				99.1059	1.40718			4
	99.2689	3.28851				99.2442	3.85081				99.0895	1.77984			5
	99.0121	3.76809				98.8317	3.52693				99.1332	2.21814			6
	98.6006	4.05668				98.6225	3.84795				99.1025	2.51813			7
	98.2673	4.30518				98.3279	3.79437				99.2629	2.51117			8
	97.7388	4.57046				98.0493	4.26919				99.0105	2.75403			9
	97.4543	4.78815				97.5392	3.86595				98.8634	2.79594			10
	97.1479	5.00559				97.1375	3.88896				98.5276	3.03799			11
	96.8751	5.19536				96.887	4.06279				98.3159	3.18648			12
	96.5557	5.32019				96.5447	4.22867				98.0469	3.27051			13
	96.2973	5.38708				96.3218	4.4101				97.7739	3.33522			14
	96.1813	5.58261				96.0093	4.37439				97.5001	3.43654			15
	95.9522	5.6613				95.7256	4.51286				97.1824	3.33973			16
	95.8034	5.77874				95.5649	4.59583				96.984	3.43147			17
	95.6737	5.85948				95.2857	4.51075				96.7711	3.42309			18
	95.5027	5.89746				95.0936	4.77012				96.4879	3.3549			19
	95.4257	5.95555				94.9332	4.73799				96.212	3.4498			20
	95.3863	5.92409				94.8649	4.59873				96.0654	3.41039			21
	95.302	5.9945				94.4909	4.69452				95.8463	3.40603			22
	95.2543	5.95384				94.7277	4.95024				95.7442	3.42726			23
	95.344	5.9266				94.4801	4.84283				95.6591	3.43485			24
	95.2939	6.02893				94.4005	4.76179				95.4559	3.4949			25
	95.3277	6.10623				94.558	4.95781				95.4401	3.50843			26
	95.376	5.93524				94.5664	4.89081				95.3296	3.56486			27
	95.3871	6.06483				94.4152	4.86658				95.3756	3.68478			28
	95.3957	6.09115				94.4167	4.88307				95.3287	3.73561			29
	95.4653	6.08892				94.5176	4.81773				95.3802	3.72174			30
	95.5701	6.34272				94.9096	5.06634				95.3603	3.72889			31
	95.5498	6.33546				94.6476	4.80975				95.446	3.74398			32
	95.6593	6.37382				95.017	5.04891				95.4358	3.76808			33
	95.7189	6.38294				95.0442	4.70247				95.4841	3.74334			34
	95.7239	6.48985				94.9777	4.88884				95.587	3.85007			35
	95.8195	6.52889				95.2625	4.87626				95.6736	3.81097			36
	95.8157	6.60997				95.532	5.4964				95.6871	3.82235			37
	96.0338	6.67018				95.5839	4.96705				95.7437	3.84867			38
	96.0727	6.73161				95.9439	5.23374				95.8993	3.77609			39
	96.2332	6.66178				95.7468	4.67333				95.9356	3.82561			40
	96.1998	6.7913				95.8024	5.06238				96.013	3.89354			41
	96.2398	6.74098				95.9515	4.33548				96.0647	3.92332			42
	96.4774	6.7849				96.2054	5.12791				96.232	3.90631			43
	96.4718	6.61404				96.4363	4.76246				96.3504	4.01464			44
	96.6597	6.57698				96.2395	4.46477				96.4436	3.97001			45
	96.7608	6.60213				96.114	4.53151				96.5601	4.05428			46
	96.8606	6.6508				96.2104	4.74313				96.6446	4.02825			47
	96.9755	6.7343				96.4315	4.52726				96.7056	3.9984			48
	97.0514	6.55271				96.5868	4.58997				96.8376	4.00486			49
	97.1918	6.62872				96.5515	4.5081				96.9507	4.071			50
	97.2788	6.6375				96.7795	4.93881				97.0397	4.08093			51
	97.3677	6.56103				96.9306	4.62776				97.1616	4.074			52
	97.5299	6.65845				97.0681	4.51616				97.2832	4.10862			53
	97.493	6.6257				97.1792	4.55725				97.4754	4.1877			54
	97.6612	6.60352				97.7473	5.09554				97.392	4.26643			55
	97.7082	6.62753				97.5819	4.5385				97.4571	4.29024			56
	97.7712	6.6559				97.8495	5.14414				97.5076	4.38191			57
	97.8734	6.66426				98.1566	5.36863				97.6058	4.43781			58
	97.9819	6.69065				98.408	5.64747				97.6039	4.34961			59
	98.05	6.65396				98.4637	5.04562				97.637	4.31428			60
