# Supplementary material for: A mechano-osmotic feedback couples cell volume to the rate of cell deformation
Source: eLife journal article supplement (doi:10.7554/elife.72381), 2022-04-13
Supplement: supp [file tether_force_all.xlsx]

## Sheet: 30 min
mean	18.9855		mean	27.7335		mean	34.0449		mean	27.2399		mean	31.8649
stdev	2.97128		stdev	6.82921		stdev	10.2739		stdev	8.58639		stdev	8.93151
n	50		n	27		n	25		n	23		n	23
N	6		N	3		N	3		N	3		N	3
control	f		Y-27632	f		Y-27632+CK-666	f		EIPA	f		EIPA+Y-27	f
200717_CLnorth_wt-HeLa-Piel_DMSO_cell01-2020.07.17-12.36.23.475.jpk-force	20.0063		200717_CLnorth_wt-HeLa-Piel_Y27632+DMSO_cell01-2020.07.17-16.08.51.022.jpk-force	23.4215		200717_CLnorth_wt-HeLa-Piel_Y27632666_cell01-2020.07.17-14.33.41.102.jpk-force	23.797		20210225	20.5		20210225	40.25
200717_CLnorth_wt-HeLa-Piel_DMSO_cell02-2020.07.17-12.52.10.042.jpk-force	16.7911		200717_CLnorth_wt-HeLa-Piel_Y27632+DMSO_cell02-2020.07.17-16.16.56.488.jpk-force	27.581		200717_CLnorth_wt-HeLa-Piel_Y27632666_cell02-2020.07.17-14.45.53.884.jpk-force	30.7676		20210225	17		20210225	23
200717_CLnorth_wt-HeLa-Piel_DMSO_cell03-2020.07.17-13.01.08.127.jpk-force	14.8026		200717_CLnorth_wt-HeLa-Piel_Y27632+DMSO_cell03-2020.07.17-16.30.28.824.jpk-force	29.7408		200717_CLnorth_wt-HeLa-Piel_Y27632666_cell03-2020.07.17-14.51.58.702.jpk-force	27.3749		20210225	19		20210225	27.4
200717_CLnorth_wt-HeLa-Piel_DMSO_cell04-2020.07.17-13.13.11.830.jpk-force	14.553		200717_CLnorth_wt-HeLa-Piel_Y27632+DMSO_cell04-2020.07.17-16.46.05.864.jpk-force	22.7867		200717_CLnorth_wt-HeLa-Piel_Y27632666_cell04-2020.07.17-14.57.23.276.jpk-force	23.3587		20210225	32.25		20210225	29
200717_CLnorth_wt-HeLa-Piel_DMSO_cell05-2020.07.17-13.24.14.874.jpk-force	16.0092		200717_CLnorth_wt-HeLa-Piel_Y27632+DMSO_cell05-2020.07.17-16.54.54.982.jpk-force	15.2027		200717_CLnorth_wt-HeLa-Piel_Y27632666_cell05-2020.07.17-15.04.38.577.jpk-force	32.7649		20210225	19.8		20210225	32.6667
200717_CLnorth_wt-HeLa-Piel_DMSO_cell06-2020.07.17-13.34.53.302.jpk-force	13.7287		200717_CLnorth_wt-HeLa-Piel_Y27632+DMSO_cell06-2020.07.17-17.05.43.613.jpk-force	25.3122		200717_CLnorth_wt-HeLa-Piel_Y27632666_cell06-2020.07.17-15.19.57.653.jpk-force	29.1591		20210225	26		20210225	39.5
200717_CLnorth_wt-HeLa-Piel_DMSO_cell07-2020.07.17-13.45.34.883.jpk-force	18.7287		200717_CLnorth_wt-HeLa-Piel_Y27632+DMSO_cell07-2020.07.17-17.13.59.480.jpk-force	21.2454		200717_CLnorth_wt-HeLa-Piel_Y27632666_cell07-2020.07.17-15.29.11.901.jpk-force	25.6819		20210225	26		20210225	33.6
200719_CLnorth_wt-HeLa-Piel_DMSO_cell01-2020.07.19-15.06.21.799.jpk-force	20.5714		200717_CLnorth_wt-HeLa-Piel_Y27632+DMSO_cell08-2020.07.17-17.25.12.523.jpk-force	35.3288		200717_CLnorth_wt-HeLa-Piel_Y27632666_cell08-2020.07.17-15.36.44.625.jpk-force	24.4222		20210225	36.5		20210226	39.4
200719_CLnorth_wt-HeLa-Piel_DMSO_cell02-2020.07.19-15.13.52.276.jpk-force	22.3454		200717_CLnorth_wt-HeLa-Piel_Y27632+DMSO_cell09-2020.07.17-17.46.54.958.jpk-force	26.5387		200717_CLnorth_wt-HeLa-Piel_Y27632666_cell09-2020.07.17-15.53.11.903.jpk-force	37.6213		20210226	31.5		20210226	28
200719_CLnorth_wt-HeLa-Piel_DMSO_cell03-2020.07.19-15.35.17.340.jpk-force	19.0217		200719_CLnorth_wt-HeLa-Piel_Y27632+DMSO_cell01-2020.07.19-17.52.54.031.jpk-force	50.8241		200719_CLnorth_wt-HeLa-Piel_Y27632666_cell01-2020.07.19-13.24.15.117.jpk-force	41.9625		20210226	42.5		20210226	43.5
200719_CLnorth_wt-HeLa-Piel_DMSO_cell04-2020.07.19-15.46.17.212.jpk-force	20.6115		200719_CLnorth_wt-HeLa-Piel_Y27632+DMSO_cell02-2020.07.19-18.06.57.346.jpk-force	34.6872		200719_CLnorth_wt-HeLa-Piel_Y27632666_cell02-2020.07.19-13.35.10.450.jpk-force	32.1972		20210226	23.1429		20210226	44.8
200719_CLnorth_wt-HeLa-Piel_DMSO_cell05-2020.07.19-15.52.26.599.jpk-force	21.2933		200719_CLnorth_wt-HeLa-Piel_Y27632+DMSO_cell03-2020.07.19-18.13.45.146.jpk-force	23.3495		200719_CLnorth_wt-HeLa-Piel_Y27632666_cell03-2020.07.19-13.43.30.794.jpk-force	30.4885		20210226	48		20210226	25.1667
200719_CLnorth_wt-HeLa-Piel_DMSO_cell06-2020.07.19-16.18.00.027.jpk-force	23.2654		200719_CLnorth_wt-HeLa-Piel_Y27632+DMSO_cell04-2020.07.19-18.21.13.346.jpk-force	24.4762		200719_CLnorth_wt-HeLa-Piel_Y27632666_cell04-2020.07.19-13.56.17.390.jpk-force	53.4194		20210226	26.7143		20210226	37.8
200719_CLnorth_wt-HeLa-Piel_DMSO_cell07-2020.07.19-16.25.46.042.jpk-force	16.8118		200719_CLnorth_wt-HeLa-Piel_Y27632+DMSO_cell05-2020.07.19-18.29.17.698.jpk-force	38.9049		200719_CLnorth_wt-HeLa-Piel_Y27632666_cell05-2020.07.19-14.05.13.579.jpk-force	56.0742		20210226	26.875		20210226	55.25
200719_CLnorth_wt-HeLa-Piel_DMSO_cell08-2020.07.19-16.33.25.625.jpk-force	21.7494		200719_CLnorth_wt-HeLa-Piel_Y27632+DMSO_cell06-2020.07.19-18.37.44.404.jpk-force	32.9467		200719_CLnorth_wt-HeLa-Piel_Y27632666_cell06-2020.07.19-14.39.34.657.jpk-force	58.9595		20210226	36.4		20210226	31
200719_CLnorth_wt-HeLa-Piel_DMSO_cell09-2020.07.19-16.40.31.151.jpk-force	18.1696		200719_CLnorth_wt-HeLa-Piel_Y27632+DMSO_cell07-2020.07.19-18.48.54.280.jpk-force	19.4019		200720_CLsouth_wt-HeLa-Piel_Y27632666_cell01-2020.07.20-13.31.06.304.jpk-force	22.5459		20210226	39.8333		20210406	14.6831
200719_CLnorth_wt-HeLa-Piel_DMSO_cell10-2020.07.19-16.47.09.835.jpk-force	20.3808		200719_CLnorth_wt-HeLa-Piel_Y27632+DMSO_cell08-2020.07.19-18.58.36.171.jpk-force	22.5461		200720_CLsouth_wt-HeLa-Piel_Y27632666_cell02-2020.07.20-13.50.04.541.jpk-force	36.6983		20210406	28.5155		20210406	19.6674
200719_CLnorth_wt-HeLa-Piel_DMSO_cell11-2020.07.19-17.01.08.003.jpk-force	19.2142		200719_CLnorth_wt-HeLa-Piel_Y27632+DMSO_cell09-2020.07.19-19.17.47.651.jpk-force	22.1163		200720_CLsouth_wt-HeLa-Piel_Y27632666_cell03-2020.07.20-14.08.11.532.jpk-force	38.0898		20210406	27.6673		20210406	21.2035
200720_CLsouth_wt-HeLa-Piel_DMSO_cell01-2020.07.20-16.39.47.100.jpk-force	23.6422		200720_CLsouth_wt-HeLa-Piel_Y27632+DMSO_cell01-2020.07.20-11.12.11.376.jpk-force	25.714		200720_CLsouth_wt-HeLa-Piel_Y27632666_cell04-2020.07.20-14.15.46.849.jpk-force	36.6566		20210406	25.427		20210406	28.2541
200720_CLsouth_wt-HeLa-Piel_DMSO_cell02-2020.07.20-16.47.36.731.jpk-force	18.6064		200720_CLsouth_wt-HeLa-Piel_Y27632+DMSO_cell02-2020.07.20-11.20.44.780.jpk-force	30.1114		200720_CLsouth_wt-HeLa-Piel_Y27632666_cell05-2020.07.20-14.32.15.568.jpk-force	32.6518		20210406	23.1923		20210406	28.3425
200720_CLsouth_wt-HeLa-Piel_DMSO_cell03-2020.07.20-17.02.15.931.jpk-force	18.0861		200720_CLsouth_wt-HeLa-Piel_Y27632+DMSO_cell03-2020.07.20-11.32.04.761.jpk-force	23.7912		200720_CLsouth_wt-HeLa-Piel_Y27632666_cell06-2020.07.20-14.48.08.641.jpk-force	48.1324		20210406	18.0398		20210406	29.5508
200720_CLsouth_wt-HeLa-Piel_DMSO_cell04-2020.07.20-17.11.10.972.jpk-force	20.5693		200720_CLsouth_wt-HeLa-Piel_Y27632+DMSO_cell04-2020.07.20-11.43.24.312.jpk-force	28.3536		200720_CLsouth_wt-HeLa-Piel_Y27632666_cell07-2020.07.20-15.00.28.721.jpk-force	26.1369		20210406	16.0257		20210406	29.6972
200720_CLsouth_wt-HeLa-Piel_DMSO_cell05-2020.07.20-17.36.49.635.jpk-force	18.4572		200720_CLsouth_wt-HeLa-Piel_Y27632+DMSO_cell05-2020.07.20-11.50.12.153.jpk-force	25.9443		200720_CLsouth_wt-HeLa-Piel_Y27632666_cell08-2020.07.20-15.16.56.902.jpk-force	25.2111		20210406	15.6353		20210406	31.1604
200720_CLsouth_wt-HeLa-Piel_DMSO_cell06-2020.07.20-17.44.01.277.jpk-force	15.4265		200720_CLsouth_wt-HeLa-Piel_Y27632+DMSO_cell06-2020.07.20-12.06.01.908.jpk-force	31.0951		200720_CLsouth_wt-HeLa-Piel_Y27632666_cell09-2020.07.20-15.26.28.715.jpk-force	32.8287
200720_CLsouth_wt-HeLa-Piel_DMSO_cell07-2020.07.20-17.58.23.105.jpk-force	15.3983		200720_CLsouth_wt-HeLa-Piel_Y27632+DMSO_cell07-2020.07.20-12.12.46.455.jpk-force	31.7879		200720_CLsouth_wt-HeLa-Piel_Y27632666_cell10-2020.07.20-15.38.53.681.jpk-force	24.1217
200720_CLsouth_wt-HeLa-Piel_DMSO_cell08-2020.07.20-18.10.33.930.jpk-force	23.5612		200720_CLsouth_wt-HeLa-Piel_Y27632+DMSO_cell08-2020.07.20-12.20.26.247.jpk-force	27.4843
200720_CLsouth_wt-HeLa-Piel_DMSO_cell09-2020.07.20-18.18.00.181.jpk-force	20.904		200720_CLsouth_wt-HeLa-Piel_Y27632+DMSO_cell09-2020.07.20-12.36.50.459.jpk-force	28.1121
20210225	21.4
20210225	16
20210225	17.6
20210225	18.6
20210225	19.5
20210225	18.4
20210225	14.25
20210225	17.3333
20210226	25.5
20210226	19.4286
20210226	25.75
20210226	20.5
20210226	21.4
20210226	23
20210226	21.3333
20210406	19.6981
20210406	19.6219
20210406	18.6456
20210406	17.7541
20210406	17.1531
20210406	15.8011
20210406	15.3059
20210406	12.5928

## Sheet: 4h
mean	19.3492		mean	21.075		mean	21.7449		mean	26.449		mean	28.5292
stdev	4.09931		stdev	2.67483		stdev	3.5192		stdev	7.36234		stdev	6.12693
n	55		n	21		n	19		n	18		n	15
N	9		N	3		N	3		N	3		N	3
control	f		Y-27	f		Y-27+CK-666	f		EIPA	f		EIPA+Y-27	f
201215_CLsouth_wt-HeLa-Piel_5hAfterSpread_DMSO_cell01-2020.12.15-16.56.57.579.jpk-force	20.0108		201215_CLsouth_wt-HeLa-Piel_5hAfterSpread_Y27632+DMSO_cell01-2020.12.15-19.36.48.662.jpk-force	17.7172		201215_CLsouth_wt-HeLa-Piel_5hAfterSpread_Y27632666_cell01-2020.12.15-18.23.49.289.jpk-force	24.3484		20210406_1	39.597		20210406_1	37.5814
201215_CLsouth_wt-HeLa-Piel_5hAfterSpread_DMSO_cell02-2020.12.15-17.04.29.644.jpk-force	16.7544		201215_CLsouth_wt-HeLa-Piel_5hAfterSpread_Y27632+DMSO_cell02-2020.12.15-19.40.46.947.jpk-force	19.6785		201215_CLsouth_wt-HeLa-Piel_5hAfterSpread_Y27632666_cell02-2020.12.15-18.33.01.448.jpk-force	21.4727		20210406_1	35.0296		20210406_1	36.0534
201215_CLsouth_wt-HeLa-Piel_5hAfterSpread_DMSO_cell03-2020.12.15-17.08.08.875.jpk-force	18.0238		201215_CLsouth_wt-HeLa-Piel_5hAfterSpread_Y27632+DMSO_cell03-2020.12.15-19.53.14.070.jpk-force	25.205		201215_CLsouth_wt-HeLa-Piel_5hAfterSpread_Y27632666_cell03-2020.12.15-18.41.49.080.jpk-force	25.5755		20210406_1	26.8818		20210406_1	32.2601
201215_CLsouth_wt-HeLa-Piel_5hAfterSpread_DMSO_cell04-2020.12.15-17.19.41.279.jpk-force	22.5013		201215_CLsouth_wt-HeLa-Piel_5hAfterSpread_Y27632+DMSO_cell04-2020.12.15-20.01.51.238.jpk-force	24.991		201215_CLsouth_wt-HeLa-Piel_5hAfterSpread_Y27632666_cell04-2020.12.15-18.50.54.100.jpk-force	22.0423		20210406_1	21.5218		20210406_1	23.1362
201215_CLsouth_wt-HeLa-Piel_5hAfterSpread_DMSO_cell05-2020.12.15-17.27.39.684.jpk-force	22.574		201215_CLsouth_wt-HeLa-Piel_5hAfterSpread_Y27632+DMSO_cell05-2020.12.15-20.08.11.528.jpk-force	16.1501		201215_CLsouth_wt-HeLa-Piel_5hAfterSpread_Y27632666_cell05-2020.12.15-18.52.59.162.jpk-force	20.2017		20210406_1	12.4406		20210406_2	25.2197
201215_CLsouth_wt-HeLa-Piel_5hAfterSpread_DMSO_cell06-2020.12.15-17.37.33.109.jpk-force	23.18		201215_CLsouth_wt-HeLa-Piel_5hAfterSpread_Y27632+DMSO_cell06-2020.12.15-20.12.22.502.jpk-force	20.9981		201215_CLsouth_wt-HeLa-Piel_5hAfterSpread_Y27632666_cell06-2020.12.15-19.13.50.989.jpk-force	29.3605		20210406_2	26.1083		20210406_2	22.0685
201215_CLsouth_wt-HeLa-Piel_5hAfterSpread_DMSO_cell07-2020.12.15-17.43.34.577.jpk-force	23.7289		201215_CLsouth_wt-HeLa-Piel_5hAfterSpread_Y27632+DMSO_cell07-2020.12.15-20.20.21.868.jpk-force	21.3332		201216_CLsouth_wt-HeLa-Piel_5hAfterSpread_Y27632666_cell01-2020.12.16-16.52.35.577.jpk-force	20.3881		20210406_2	25.416		20210406_2	20.6691
201215_CLsouth_wt-HeLa-Piel_5hAfterSpread_DMSO_cell08-2020.12.15-17.52.27.040.jpk-force	27.0576		201215_CLsouth_wt-HeLa-Piel_5hAfterSpread_Y27632+DMSO_cell08-2020.12.15-20.30.45.820.jpk-force	23.442		201216_CLsouth_wt-HeLa-Piel_5hAfterSpread_Y27632666_cell02-2020.12.16-17.14.10.274.jpk-force	19.2563		20210406_2	22.7077		20210406_2	17.0389
201215_CLsouth_wt-HeLa-Piel_5hAfterSpread_DMSO_cell09-2020.12.15-17.53.56.355.jpk-force	26.1751		201215_CLsouth_wt-HeLa-Piel_5hAfterSpread_Y27632+DMSO_cell09-2020.12.15-20.34.38.185.jpk-force	22.8577		201216_CLsouth_wt-HeLa-Piel_5hAfterSpread_Y27632666_cell03-2020.12.16-17.24.07.545.jpk-force	19.3129		20210406_2	22.6337		20210406_3	37.3074
201216_CLsouth_wt-HeLa-Piel_5hAfterSpread_DMSO_cell01-2020.12.16-18.14.32.226.jpk-force	17.7489		201215_CLsouth_wt-HeLa-Piel_5hAfterSpread_Y27632+DMSO_cell10-2020.12.15-20.44.31.706.jpk-force	23.6085		201216_CLsouth_wt-HeLa-Piel_5hAfterSpread_Y27632666_cell04-2020.12.16-17.36.03.394.jpk-force	21.1273		20210406_2	20.6087		20210406_3	32.6228
201216_CLsouth_wt-HeLa-Piel_5hAfterSpread_DMSO_cell02-2020.12.16-18.24.52.631.jpk-force	31.9539		201216_CLsouth_wt-HeLa-Piel_5hAfterSpread_Y27632+DMSO_cell01-2020.12.16-14.40.36.520.jpk-force	22.8058		201216_CLsouth_wt-HeLa-Piel_5hAfterSpread_Y27632666_cell05-2020.12.16-17.46.39.253.jpk-force	16.6321		20210406_2	15.8693		20210406_3	32.568
201216_CLsouth_wt-HeLa-Piel_5hAfterSpread_DMSO_cell03-2020.12.16-18.32.01.406.jpk-force	18.3259		201216_CLsouth_wt-HeLa-Piel_5hAfterSpread_Y27632+DMSO_cell02-2020.12.16-14.58.54.896.jpk-force	23.8901		201216_CLsouth_wt-HeLa-Piel_5hAfterSpread_Y27632666_cell06-2020.12.16-18.03.02.865.jpk-force	16.101		20210406_3	36.2875		20210406_3	30.1614
201216_CLsouth_wt-HeLa-Piel_5hAfterSpread_DMSO_cell04-2020.12.16-18.43.28.195.jpk-force	18.5249		201216_CLsouth_wt-HeLa-Piel_5hAfterSpread_Y27632+DMSO_cell03-2020.12.16-15.15.00.468.jpk-force	24.5765		201221_CLsouth_wt-HeLa-Piel_5hAfterSpread_Y27632666_cell01-2020.12.21-12.40.20.846.jpk-force	27.4909		20210406_3	35.145		20210406_3	30.1277
201216_CLsouth_wt-HeLa-Piel_5hAfterSpread_DMSO_cell05-2020.12.16-18.53.59.561.jpk-force	20.3294		201216_CLsouth_wt-HeLa-Piel_5hAfterSpread_Y27632+DMSO_cell04-2020.12.16-15.33.03.290.jpk-force	18.369		201221_CLsouth_wt-HeLa-Piel_5hAfterSpread_Y27632666_cell02-2020.12.21-12.47.12.629.jpk-force	25.9891		20210406_3	33.7634		20210406_3	26.5778
201221_CLsouth_wt-HeLa-Piel_5hAfterSpread_DMSO_cell01-2020.12.21-14.38.58.739.jpk-force	17.5859		201216_CLsouth_wt-HeLa-Piel_5hAfterSpread_Y27632+DMSO_cell05-2020.12.16-15.51.18.323.jpk-force	18.0293		201221_CLsouth_wt-HeLa-Piel_5hAfterSpread_Y27632666_cell03-2020.12.21-12.58.57.678.jpk-force	17.5298		20210406_3	32.2998		20210406_3	24.5448
201221_CLsouth_wt-HeLa-Piel_5hAfterSpread_DMSO_cell02-2020.12.21-14.55.49.446.jpk-force	27.8313		201216_CLsouth_wt-HeLa-Piel_5hAfterSpread_Y27632+DMSO_cell06-2020.12.16-16.00.33.113.jpk-force	22.5085		201221_CLsouth_wt-HeLa-Piel_5hAfterSpread_Y27632666_cell04-2020.12.21-13.13.37.837.jpk-force	20.5881		20210406_3	28.5488
201221_CLsouth_wt-HeLa-Piel_5hAfterSpread_DMSO_cell03-2020.12.21-15.09.02.497.jpk-force	18.877		201216_CLsouth_wt-HeLa-Piel_5hAfterSpread_Y27632+DMSO_cell07-2020.12.16-16.16.56.871.jpk-force	17.5165		201221_CLsouth_wt-HeLa-Piel_5hAfterSpread_Y27632666_cell05-2020.12.21-13.33.28.059.jpk-force	19.4849		20210406_3	20.6125
201221_CLsouth_wt-HeLa-Piel_5hAfterSpread_DMSO_cell05-2020.12.21-15.35.04.422.jpk-force	16.5398		201221_CLsouth_wt-HeLa-Piel_5hAfterSpread_Y27632+DMSO_cell01-2020.12.21-16.51.35.511.jpk-force	19.8573		201221_CLsouth_wt-HeLa-Piel_5hAfterSpread_Y27632666_cell06-2020.12.21-13.46.42.993.jpk-force	24.11		20210406_3	20.6111
201221_CLsouth_wt-HeLa-Piel_5hAfterSpread_DMSO_cell06-2020.12.21-15.48.41.409.jpk-force	16.9929		201221_CLsouth_wt-HeLa-Piel_5hAfterSpread_Y27632+DMSO_cell02-2020.12.21-17.11.29.403.jpk-force	21.1264		201221_CLsouth_wt-HeLa-Piel_5hAfterSpread_Y27632666_cell07-2020.12.21-14.05.05.528.jpk-force	22.1416
201221_CLsouth_wt-HeLa-Piel_5hAfterSpread_DMSO_cell07-2020.12.21-16.02.00.496.jpk-force	16.3201		201221_CLsouth_wt-HeLa-Piel_5hAfterSpread_Y27632+DMSO_cell03-2020.12.21-17.21.59.440.jpk-force	19.2332
20210406_1	15.6744		201221_CLsouth_wt-HeLa-Piel_5hAfterSpread_Y27632+DMSO_cell04-2020.12.21-17.28.47.439.jpk-force	18.681
20210406_1	15.4544
20210406_1	15.4042
20210406_1	14.0741
20210406_1	13.8801
20210406_1	11.8856
20210406_2	16.7719
20210406_2	16.688
20210406_2	16.5426
20210406_2	15.551
20210406_2	14.7482
20210406_2	14.0753
20210406_2	13.2913
20210406_3	22.3646
20210406_3	21.9295
20210406_3	20.2385
20210406_3	19.4963
20210406_3	17.1283
20210406_3	16.2385
211026-1116_1	24.75
211026-1116_1	26.7143
211026-1116_1	20.6
211026-1116_1	17.1667
211026-1116_1	18.75
211026-1116_2	23.5
211026-1116_2	22.2
211026-1116_2	18.5
211026-1116_2	17
211026-1116_2	22.5
211026-1116_2	19.4545
211026-1116_3	24.6
211026-1116_3	21.1
211026-1116_3	18
211026-1116_3	18.4
211026-1116_3	18.5

## Sheet: 4h_round
mean	20.4245		mean	20.5624
stdev	4.25545		stdev	3.99815
n	18		n	20
N	3		N	3
control	f		Y-27	f
211026-1116_1	21.75		211026-1116_1	29.5
211026-1116_1	12.3333		211026-1116_1	28.2
211026-1116_1	17.5		211026-1116_1	19.3333
211026-1116_1	19		211026-1116_1	14.25
211026-1116_1	30.5		211026-1116_1	15.25
211026-1116_2	20.2		211026-1116_1	16.8571
211026-1116_2	23.6667		211026-1116_1	24.5
211026-1116_2	19.25		211026-1116_2	25.8
211026-1116_2	17.8		211026-1116_2	22.5
211026-1116_2	21		211026-1116_2	21.7143
211026-1116_2	18		211026-1116_2	20.75
211026-1116_3	19.25		211026-1116_2	20.5
211026-1116_3	21		211026-1116_2	21
211026-1116_3	18.6		211026-1116_3	18.5
211026-1116_3	18.8571		211026-1116_3	19.1429
211026-1116_3	30.1		211026-1116_3	18.5833
211026-1116_3	19		211026-1116_3	17.6667
211026-1116_3	19.8333		211026-1116_3	21.4
			211026-1116_3	18.4
			211026-1116_3	17.4

## Sheet: statistical analysis
Normality Shapiro-Wilk test
control 30 min	d1: Gaussian: Statistics=0.990, p=0.9494043589
control 4 h	d2: normality test failed: Statistics=0.956, p=0.0436548926
control 4 h round	d3: normality test failed: Statistics=0.833, p=0.0046130689
Y-27 30 min	d4: normality test failed: Statistics=0.911, p=0.0238937270
Y-27 4 h	d5: Gaussian: Statistics=0.951, p=0.3614418507
Y-27 4 h round	d6: Gaussian: Statistics=0.947, p=0.3239569664
Y-27+CK-666 30 min	d7: normality test failed: Statistics=0.870, p=0.0042832359
Y-27+CK-666 4 h	d8: Gaussian: Statistics=0.966, p=0.6891852021
EIPA 30 min	d9: Gaussian: Statistics=0.941, p=0.1907404810
EIPA 4 h	d10: Gaussian: Statistics=0.962, p=0.6394146085
Y-27+EIPA 30 min	d11: Gaussian: Statistics=0.967, p=0.6279571652
Y-27+EIPA 4 h	d12: Gaussian: Statistics=0.957, p=0.6383050680
Comparison distribution		method	p-value
control 30 min	control 4 h	Mann–Whitney	0.466763
control 30 min	Y-27 30 min	Mann–Whitney	1.1e-09
Y-27 30 min	Y-27 4 h	Mann–Whitney	2.76715e-05
control 4 h	control 4 h round	Mann–Whitney	0.0980587
Y-27 4 h	Y-27 4 h round	Student	0.633282
EIPA 30 min	EIPA 4 h	Student	0.763001
EIPA 30 min	Y-27+EIPA 30 min	Student	0.0869288
Y-27+EIPA 30 min	Y-27+EIPA 4 h	Student	0.226106
Y-27+CK-666 30 min	Y-27+CK-666 4 h	Mann–Whitney	1.3567e-06
Y-27 30 min	Y-27+CK-666 30 min	Mann–Whitney	0.01001
Y-27 4 h	Y-27+CK-666 4 h	Student	0.51055
Y-27 30 min	Y-27+EIPA 30 min	Mann–Whitney	0.0322146
control 4 h	EIPA 4 h	Mann–Whitney	8.18954e-05
