# Supplementary material for: A mechano-osmotic feedback couples cell volume to the rate of cell deformation
Source: eLife journal article supplement (doi:10.7554/elife.72381), 2022-04-13
Supplement: supp [file thickness.xlsx]

## Sheet: Sheet1
x (µm)	Ctr_22_mean	Ctr_7_mean	Lat_22_mean	Lat_7_mean	Ctr_22_sd	Ctr_7_sd	Lat_22_sd	Lat_7_sd
-1.6	27.8236	11.2983	37.3368	19.5821	8.59152	5.16686	21.1874	12.1967
-1.5675	29.0916	11.6035	37.4047	20.0683	9.27055	5.36817	21.1802	12.9538
-1.535	30.3597	11.9088	37.4727	20.5546	10.0015	5.60798	21.2207	13.7269
-1.5025	31.7748	12.203	38.0484	21.1729	10.8609	5.64628	21.6311	14.0233
-1.47	33.1929	12.4971	38.6348	21.794	11.8269	5.72042	22.0566	14.3288
-1.4375	34.6127	12.6843	39.2663	22.2685	11.9614	5.83804	21.917	14.7666
-1.405	36.0326	12.867	39.8997	22.7367	12.1016	6.00613	21.7644	15.2475
-1.3725	36.8079	13.1494	40.7427	22.8481	12.6216	5.94282	21.7752	15.6332
-1.34	37.5411	13.4383	41.5994	22.9362	13.2585	5.88786	21.8134	16.0584
-1.3075	38.9293	13.7359	41.921	23.505	13.7901	6.06642	21.5168	16.389
-1.275	40.3756	14.0342	42.1951	24.1166	14.4076	6.45084	21.2542	16.7223
-1.2425	41.6251	14.5466	42.8098	25.131	15.1552	6.29326	21.1635	17.497
-1.21	42.8523	15.0833	43.4631	26.1912	15.9808	6.16398	21.1565	18.3833
-1.1775	44.4434	15.423	44.5505	26.4604	16.6659	6.39279	21.6606	18.5486
-1.145	46.0853	15.7352	45.6984	26.6193	17.4388	6.69824	22.246	18.643
-1.1125	48.0403	16.1976	46.9149	27.3587	18.1261	7.0108	22.6302	19.2167
-1.08	50.0475	16.685	48.1428	28.1948	18.8537	7.37393	23.0506	19.908
-1.0475	52.1301	17.0081	48.9251	29.1082	19.9891	7.42826	23.5456	20.8422
-1.015	54.2273	17.2992	49.6205	30.0367	21.2341	7.44764	24.072	21.8857
-0.9825	56.2491	17.7492	50.9386	31.034	22.5807	7.34449	24.321	22.4908
-0.95	58.2538	18.235	52.3968	32.0468	23.9864	7.24721	24.6086	23.0307
-0.9175	60.7079	18.7981	53.6736	33.2013	24.9654	7.40167	23.7087	23.039
-0.885	63.2772	19.381	54.9039	34.3922	25.9407	7.63628	22.5261	22.9473
-0.8525	65.5136	20.1231	56.2856	35.6347	27.1053	7.9802	22.8704	23.7645
-0.82	67.6535	20.9113	57.711	36.8921	28.3354	8.38919	23.7085	24.858
-0.7875	70.0889	21.3609	58.8905	37.9604	30.2341	8.70304	24.0125	25.5877
-0.755	72.62	21.7007	59.9902	38.9673	32.3589	9.01505	24.1778	26.2369
-0.7225	75.5357	22.3891	61.6304	40.6827	34.0844	9.22442	23.7477	27.4999
-0.69	78.5902	23.2035	63.4658	42.654	35.7362	9.44748	23.1688	28.9981
-0.6575	81.9444	24.1526	64.7132	44.2911	37.3499	9.69042	22.8989	30.6063
-0.625	85.4185	25.1557	65.7253	45.7946	38.987	9.94337	22.848	32.259
-0.5925	88.7233	26.2182	67.3979	48.0337	39.8413	10.1818	22.8843	34.4681
-0.56	91.9535	27.3069	69.362	50.5973	40.3646	10.4324	22.9633	36.9494
-0.5275	96.1762	28.3993	71.2785	53.4083	42.7972	10.8442	23.3485	38.5814
-0.495	100.88	29.4934	73.172	56.3392	46.1924	11.374	23.9279	39.826
-0.4625	105.693	30.6999	74.763	59.056	48.4061	11.9404	23.5213	41.7217
-0.43	110.564	31.966	76.1935	61.659	50.0141	12.53	22.608	43.972
-0.3975	115.817	33.203	78.1311	64.7154	51.4715	12.9771	22.4183	46.6627
-0.365	121.291	34.4232	80.3632	68.0349	52.8525	13.3791	22.7421	49.6254
-0.3325	126.817	35.7324	82.588	71.3854	55.0812	13.7223	23.0163	52.2809
-0.3	132.375	37.098	84.8083	74.7554	57.8761	14.0127	23.2734	54.7504
-0.2675	137.135	38.5048	87.0568	77.9284	59.1493	14.5287	23.3823	57.2026
-0.235	141.346	39.94	89.3247	80.9657	59.3945	15.2198	23.4351	59.6542
-0.2025	146.17	41.4741	91.6396	83.2933	60.4448	16.0219	23.9205	61.8803
-0.17	151.455	43.0824	93.9897	85.0885	62.114	16.9195	24.7979	63.9519
-0.1375	156.186	44.2653	96.2415	86.9104	63.1794	17.5626	25.5808	66.0728
-0.105	160.467	45.1016	98.4131	88.7541	63.7854	17.9988	26.2975	68.2231
-0.0725	164.028	45.8454	99.8825	89.8718	64.5353	18.3162	26.4678	69.5355
-0.04	166.953	46.5074	100.731	90.3474	65.4177	18.547	26.1876	70.1236
-0.0075	168.771	46.8542	101.176	90.2297	65.6499	18.7771	26.1343	70.2829
0.025	169.526	46.8982	101.236	89.5423	65.2362	18.9937	26.2608	70.0223
0.0575	169.125	46.6908	101.122	87.9809	65.0378	19.0832	26.7863	69.5865
0.09	167.522	46.2214	100.829	85.5089	65.0579	19.029	27.6862	68.9649
0.1225	164.952	45.7007	100.453	82.8887	65.2018	18.8911	28.1793	67.5532
0.155	161.288	45.122	99.9822	80.1009	65.4958	18.7091	28.2698	65.275
0.1875	157.329	44.0922	99.1659	77.3847	65.6146	18.3702	28.4126	62.9341
0.22	153.009	42.5089	97.9256	74.7562	65.5182	17.7845	28.5646	60.4788
0.2525	147.891	40.9391	96.2087	71.9569	64.9917	17.1762	29.2734	57.8581
0.285	141.711	39.3872	93.8566	68.9299	63.8217	16.5079	30.7367	55.0449
0.3175	135.932	37.8411	91.5674	66.1351	62.8825	15.9559	31.262	52.2527
0.35	130.733	36.3033	89.3694	63.6771	62.2796	15.5661	30.3066	49.4271
0.3825	125.932	34.7918	87.4873	61.2658	60.8845	15.1798	29.7359	47.1159
0.415	121.758	33.3217	86.104	58.9285	58.2384	14.8065	29.7431	45.565
0.4475	117.176	31.9065	84.5667	56.5148	56.0292	14.5783	29.6611	43.4349
0.48	111.89	30.5857	82.7642	53.9697	54.5313	14.583	29.4392	40.2868
0.5125	107.204	29.2409	81.0304	51.5379	53.1593	14.3519	29.7105	37.3571
0.545	103.646	27.8506	79.4262	49.3197	51.9878	13.6513	30.8322	34.8001
0.5775	100.51	26.6037	77.7607	47.2965	50.886	12.9578	31.5449	32.627
0.61	98.2439	25.6522	75.9688	45.6756	49.931	12.2609	31.3741	31.1419
0.6425	96.3915	24.7592	74.6251	44.1924	49.1649	11.8176	31.1589	29.5981
0.675	95.4771	23.9987	74.2973	43.0213	48.7331	11.8469	30.7358	27.8504
0.7075	94.3861	23.299	73.5748	41.6608	47.9685	11.8629	30.5514	26.343
0.74	92.8537	22.7515	71.8657	39.8267	46.3878	11.7764	30.9118	25.338
0.7725	91.5796	22.1891	70.0625	38.255	45.1739	11.7611	31.1671	24.5332
0.805	91.0211	21.5854	67.9984	37.41	44.8124	11.8809	31.0201	24.1895
0.8375	90.4557	21.0311	66.2346	36.5807	44.3698	11.9528	30.9963	23.8957
0.87	89.8695	20.6293	65.3972	35.8	43.4232	11.8106	31.2968	23.6621
0.9025	89.2565	20.3725	64.6118	34.9784	42.5516	11.8939	31.3653	23.532
0.935	88.5512	20.617	64.0064	34.016	41.8167	12.7226	30.4394	23.7132
0.9675	87.9752	20.6807	63.2012	33.0871	41.3545	13.3195	29.7997	23.744
1	87.9035	20.0393	61.6163	32.2887	41.8002	12.9064	30.0613	23.1381
1.0325	87.8252	19.474	60.1562	31.4989	41.9878	12.5953	30.3172	22.4892
1.065	87.7176	19.2463	59.251	30.748	40.8925	12.2262	30.306	21.559
1.0975	87.4457	19.0083	58.3088	30.0731	40.0315	11.9363	30.238	20.8238
1.13	86.3321	18.7177	57.1771	29.7876	39.9288	11.9797	29.6915	20.9664
1.1625	85.4404	18.4789	56.0714	29.4738	39.9904	12.0515	29.2537	21.051
1.195	85.8803	18.5506	55.1225	28.9895	40.8262	12.1144	29.209	20.7143
1.2275	86.1443	18.5978	54.1889	28.5069	41.5822	12.2254	29.1798	20.3725
1.26	85.1479	18.4686	53.3657	28.0362	41.6517	12.3645	29.0908	19.8959
1.2925	84.1673	18.3697	52.5691	27.5834	41.6991	12.5044	29.0149	19.4461
1.325	83.3271	18.5368	52.0075	27.2869	41.3895	12.5719	28.5112	19.1294
1.3575	82.4727	18.6792	51.4113	26.9815	41.1399	12.6524	28.0499	18.8161
1.39	81.4597	18.5454	50.4264	26.5748	41.0322	12.4421	27.8865	18.374
1.4225	80.4929	18.4092	49.4662	26.1528	40.9405	12.2429	27.7217	17.9578
1.455	80.2337	18.2385	48.8851	25.497	40.5103	12.0026	27.1373	17.4494
1.4875	79.9468	18.0653	48.2806	24.8414	40.1803	11.7777	26.5791	16.9384
1.52	79.009	17.8333	47.1278	24.1916	40.735	11.781	25.8383	15.9139
1.5525	78.0611	17.605	45.9902	23.5478	41.3124	11.7904	25.1506	14.9687
1.585	76.6297	17.5534	45.5854	23.1943	40.901	11.6531	25.144	14.5097
1.6175	75.1982	17.5018	45.1807	22.8408	40.5319	11.5364	25.1588	14.0854
