# Supplementary material for: A mechano-osmotic feedback couples cell volume to the rate of cell deformation
Source: eLife journal article supplement (doi:10.7554/elife.72381), 2022-04-13
Supplement: supp [file total_membrane.xlsx]

## Sheet: 0
1	1	1	2	2	2	3	3	3	3	3	3	3	4	4	4	4	4	4	5	5	5	5	5	5	5
1	2	5	1	2	3	2	3	5	7	8	9	10	2	4	6	7	8	9	2	5	6	7	9	10	11
100	100	100	100	100	100	100	100	100	100	100	100	100	100	100	100	100	100	100	100	100	100	100	100	100	100		100	4.82719e-15	26		0	0
99.7827	99.864	99.9324	100.03	100.284	100.19	100.085	100.904	98.1137	98.852	99.957	99.9255	99.5944	99.9833	100.525	99.7412	99.1399	100.319	99.9881	99.3271	100.235	99.1499	99.5019	99.1698	100.4	100.257		99.8174	0.580823			1	0.5
98.7874	100.014	100.973	99.6299	100.295	100.132	98.6181	100.563	98.2366	98.0093	100.055	99.5934	99.9286	99.8009	100.506	99.3527	99.8252	99.6418	100.533	98.7374	99.2815	98.7888	99.9181	99.7183	100.728	99.3191		99.6533	0.754996			2	1
100.126	98.8023	101.229	99.7018	98.8538	100.441	97.7343	99.0588	97.6224	98.7541	100.16	99.2101	100.214	99.4509	101.075	99.6209	99.233	100.474	100.496	97.7909	99.5821	99.1235	99.7604	99.5411	101.416	100.064		99.5975	0.981097			3	1.5
99.8681	98.3858	99.5669	99.6773	98.5829	99.6155	97.7034	98.7719	98.0535	98.8093	100.09	99.5152	100.314	99.3218	101.354	99.2697	99.6972	100.409	100.551	97.4576	99.1389	98.8055	99.6355	98.3436	102.078	100.329		99.4363	1.04627			4	2
100.061	97.9707	101.171	98.7521	99.1524	100.721	96.8047	99.9123	98.8861	99.4186	98.4397	99.8315	101.164	99.7132	101.48	98.7167	99.9305	100.503	101.366	97.2191	99.0699	100.097	98.4726	99.7923	102.813	100.533		99.692	1.33961			5	2.5
99.5671	98.0745	100.033	99.6085	97.8926	100.421	97.6094	97.7587	98.8876	98.5247	99.1129	99.817	100.775	99.7525	100.893	99.2036	99.8284	101.632	101.556	97.369	98.9027	99.4732	98.9151	99.9486	102.672	99.914		99.5439	1.27356			6	3
100.373	98.3019	102.056	99.5166	98.5907	99.7914	97.7833	99.7813	98.6118	99.0127	100.336	100.298	101.607	100.208	101.042	99.0695	100.559	101.295	101.783	97.8349	98.2255	100.722	99.1305	101.711	103.511	100.378		100.059	1.41072			7	3.5
100.375	98.3264	101.336	99.5153	98.6688	99.9441	96.4387	98.4643	98.6655	99.7235	99.9279	100.667	102.155	100.785	101.585	99.1247	101.413	101.639	102.464	97.3545	99.2268	100.387	97.908	101.33	104.329	99.9349		100.065	1.70871			8	4
101.026	98.4568	101.691	99.6853	98.0649	100.685	97.8306	98.7293	98.0145	100.356	99.7703	101.079	101.846	101.167	101.902	99.1791	100.897	101.597	102.558	97.3202	98.1959	101.655	98.4514	100.098	104.422	100.322		100.192	1.70352			9	4.5
101.657	98.7399	101.652	99.8371	98.1233	100.771	98.0105	98.6786	99.2061	100.217	100.159	101.296	103.009	100.745	102.268	99.1042	101.617	101.545	101.936	98.2516	99.6598	101.129	99.8856	102.105	105.87	99.7878		100.587	1.73238			10	5
398.188	319.043	348.732	275.603	290.144	418.411	364.868	358.736	447.403	490.785	411.358	304.842	400.498	431.931	404.189	360.887	389.396	397.152	368.925	497.758	470.417	483.488	515.63	513.392	507.417	514.848		410.925	71.4332			11	5.5
542.338	437.724	498.373	359.262	375.189	544.033	475.786	456.835	565.813	618.286	522.906	387.446	502.721	536.803	491.849	428.742	442.492	474.572	436.777	599.401	566.95	570.175	594.566	611.313	604.866	610.575		509.838	76.6481			12	6
639.868	515.701	600.127	416.74	437.432	624.452	555.405	525.785	643.693	704.274	595.004	445.816	575.462	604.013	546.596	468.336	468.272	501.133	477.178	667.575	425.931	622.356	640.551	674.969	488.849	509.627		552.89	83.6317			13	6.5
711.845	574.651	460.163	461.814	485.411	508.044	611.218	576.798	697.409	758.133	638.233	486.655	516.539	650.556	586.819	498.369	488.984	515.664	505.781	715.23	335.571	655.196	668.029	413.974	430.032	455.535		554.102	105.914			14	7
767.122	622.805	388.894	497.893	464.459	255.154	658.047	613.039	328.23	558.912	421.35	516.775	409.584	674.44	601.926	519.183	500.248	518.789	525.769	751.523	297.695	441.138	685.618	330.185	367.744	422.966		505.365	136.043			15	7.5
801.278	591.236	350.222	522.535	402.291	194.45	690.946	638.716	218.586	488.468	392.738	536.142	364.382	684.391	601.715	527.629	499.124	511.047	534.031	773.603	280.322	388.809	558.585	304.953	313.432	396.655		483.319	158.451			16	8
823.666	524.639	316.722	446.382	360.687	161.796	715.9	655.31	179.687	459.197	376.879	545.977	349.802	685.723	595.656	530.409	491.065	498.84	533.71	703.45	268.675	361.162	465.039	298.702	278.596	378.817		461.788	166.167			17	8.5
843.832	479.571	292.55	394.039	328.426	136.583	736.321	664.439	155.574	441.444	364.609	547.812	335.835	682.287	585.995	526.81	477.956	483.416	528.405	619.999	253.877	339.256	424.926	292.157	250.972	362.581		444.218	173.147			18	9
733.258	458.631	273.221	353.786	300.594	126.153	748.846	667.219	139.678	423.488	351.999	545.059	322.667	674.809	575.127	519.361	463.456	465.335	519.789	546.36	231.49	313.417	396.06	286.331	230.54	347.032		423.604	168.556			19	9.5
599.517	442.062	257.785	326.133	278.305	119.764	757.242	666.577	133.122	411.544	340.392	538.246	309.971	664.786	563.731	510.441	448.323	449.055	509.724	502.133	215.925	294.426	364.604	282.791	215.254	333.708		405.214	163.564			20	10
541.453	427.356	244.943	307.795	256.954	113.293	760.943	660.254	127.148	398.447	327.896	527.884	297.064	651.907	550.923	499.674	433.415	432.071	498.179	470.396	213.03	280.661	352.132	275.79	201.866	322.228		391.296	162.166			21	10.5
496.642	415.659	234.507	293.031	239.202	108.253	761.975	651.67	122.246	385.965	316.78	515.879	284.534	639.334	538.267	489.56	420.459	415.363	486.425	446.428	208.361	269.262	343.965	272.001	189.887	309.957		379.062	160.968			22	11
463.888	402.728	225.747	277.973	223.2	103.265	758.66	641.188	118.326	374.028	305.086	502.829	274.478	624.56	524.885	479.084	408.428	401.672	474.554	427.917	203.828	256.541	334.349	268.209	179.294	299.179		367.458	159.517			23	11.5
439.402	392.075	214.722	268.115	209.309	100.689	753.499	628.129	113.761	364.077	294.099	488.54	264.656	611.441	513.165	468.054	399.4	389.574	464.939	411.281	197.744	247.297	325.608	264.641	170.559	289.958		357.105	157.929			24	12
416.999	382.507	207.223	258.758	201.806	96.9091	744.963	616.132	111.734	351.135	280.983	473.718	255.131	597.122	502.066	458.178	390.105	377.609	453.428	399.824	192.457	237.855	316.801	259.561	164.299	281.345		347.256	155.67			25	12.5
400.244	373.21	200.945	250.792	195.507	95.045	734.438	601.808	109.941	341.76	272.943	459.607	245.879	582.853	489.729	448.903	380.485	367.696	443.643	388.94	186.956	229.609	308.144	256.29	158.782	272.719		338.341	152.838			26	13
382.903	364.154	194.765	244.486	189.644	93.2465	723.13	587.052	106.602	332.705	265.249	444.542	237.49	569.186	478.25	438.453	372.405	357.357	432.719	378.097	182.94	221.475	300.934	249.48	155.991	264.634		329.534	149.791			27	13.5
																											100.059	1.41072	0
																											100.065	1.70871	0.5
																											100.192	1.70352	1
																											100.587	1.73238	1.5
																											410.925	71.4332	2
																											509.838	76.6481	2.5
																											552.89	83.6317	3
																											554.102	105.914	3.5
843.832	622.805	600.127	522.535	485.411	624.452	761.975	667.219	697.409	758.133	638.233	547.812	575.462	685.723	601.926	530.409	500.248	518.789	534.031	773.603	566.95	655.196	685.618	674.969	604.866	610.575		626.473	90.2931
972.871	1678.39	1089.82	886.216	1031.81	1305.66
970.756	1676.11	1074.42	888.209	1031.11	1294.06
961.073	1678.63	1064.38	873.837	1041.85	1286.93
974.1	1658.29	1059.1	877.228	1044.49	1284.69
971.587	1651.3	1044.39	868.594	1027.34	1285.24
973.468	1644.33	1034.58	866.272	1043.89	1283.34
968.659	1646.08	1032.73	872.822	1032.15	1279.45
976.495	1649.89	1019.78	868.74	1053.02	1274.78
976.522	1650.3	1022.55	871.268	1045.59	1276.2
982.857	1652.49	1006.74	875.356	1049.25	1275.9
988.993	1657.24	1002.38	867.132	1048.86	1274.05
3873.85	5354.8	3576.76	2630.34	3598.24	3777.75
5276.25	7346.73	4984.28	3716.35	5142.25	5187.23
6225.09	8655.5	5854.43	4497.09	6192.16	6113.2
6925.33	9644.9	5277.12	5056.28	4748	6815.42
7463.11	10453.1	5303.9	4373.55	4012.64	7337.65
7795.4	9923.26	4575.7	3648.44	3613.62	7732.43
8013.2	8805.5	4276.53	3227.19	3267.96	8030.89
8209.39	8049.09	3931.56	2862.21	3018.55	8298.12
7133.65	7697.63	3625.45	2637.92	2819.12	7354.79
5832.52	7419.55	3404.07	2455.15	2659.84	6308.33
5267.64	7172.71	3259.64	2299.9	2527.34	5082.26
4831.68	6976.4	3094.11	2188.15	2419.66	4284.38
4513.03	6759.37	2983.49	2089.43	2329.28	3816.9
4274.81	6580.57	2902.03	2003.54	2215.52	3591.2
4056.86	6419.98	2792.49	1931.37	2138.15	3405.89
3893.86	6263.94	2695.35	1861.6	2073.37	3290.6
3725.15	6111.93	2632.88	1809.22	2009.61	3146.86

## Sheet: 1
1	1	1	1	1	2	2	2	2	2	2	3	3	3	3	3	3	3	3	4	4	4	4	5	5	5	5	5	5	5	5	5	5	5	5
1	4	8	9	11	1	2	4	6	9	11	3	4	5	7	12	13	14	15	1	3	5	8	1	2	6	7	9	10	13	14	15	16	17	18
100	100	100	100	100	100	100	100	100	100	100	100	100	100	100	100	100	100	100	100	100	100	100	100	100	100	100	100	100	100	100	100	100	100	100		100	4.80415e-15	35		0
99.2942	98.6664	100.097	99.3542	99.9939	99.5852	100.182	100.034	100.387	99.1243	99.4025	98.9447	100.811	99.953	99.8726	99.3584	100.017	99.8659	98.9332	99.8347	99.8761	100.301	100.249	100.099	100.13	100.057	99.5099	99.317	99.2873	100.317	99.8055	99.5734	99.3322	99.0057	99.7405		99.7232	0.481727			1
98.2947	98.2363	100.201	99.6147	99.9891	98.9552	99.759	99.3853	99.6432	98.6653	99.5666	99.1499	100.363	100.167	99.7635	98.7254	99.0554	99.9456	98.6266	99.2156	98.9716	100.171	100.898	99.7421	99.9768	100.316	98.8428	99.1465	98.8457	99.8844	99.5479	99.4249	98.7894	99.1962	99.5467		99.4463	0.618439			2
97.8354	99.1877	99.4897	99.1773	99.5557	99.3005	99.99	99.5063	99.0813	98.5559	99.9888	99.5538	100.813	99.9859	99.3658	98.8015	98.942	99.6148	98.9538	100.521	98.6091	100.655	101.343	99.2697	99.5978	100.551	98.4337	99.3903	99.7757	99.6868	99.3034	99.5903	99.1	98.9271	99.5509		99.4858	0.700622			3
97.8351	99.0072	98.5471	99.5077	99.1476	99.0237	99.7901	100.205	99.4606	98.0465	100.253	99.6332	100.707	99.7961	99.7572	98.4555	98.5775	99.1155	98.6082	100.05	98.2937	100.89	101.461	99.3457	99.0938	100.772	98.2414	99.4121	99.8241	99.9237	99.5231	99.5656	98.9673	98.8066	99.168		99.3947	0.823958			4
97.8964	99.8258	98.6776	99.2253	98.6395	98.9183	100.433	100.526	98.6085	97.9687	99.7759	99.441	100.049	100.216	100.194	98.6062	98.3435	99.5811	99.1357	99.5455	98.0564	99.9266	101.899	99.9085	99.2093	101.341	98.1987	99.4545	99.8546	100.028	100.131	99.8771	99.2037	98.8978	98.8335		99.4408	0.899195			5
98.2495	100.161	98.7114	99.4089	98.6994	99.0978	100.471	100.342	98.283	98.4255	99.8006	99.0508	100.459	100.505	100.981	98.039	97.644	99.9419	99.1272	99.2501	98.3272	100.01	102.491	100.017	98.6954	101.797	98.0433	99.5621	99.7245	100.064	99.8078	99.7381	99.7426	99.1032	99.025		99.5085	1.0416			6
98.3726	100.102	98.1256	99.714	98.5736	99.0478	100.518	100.272	98.49	98.4975	99.5537	100.105	99.986	100.116	101.898	98.4435	98.527	98.9579	99.2022	98.7664	98.1423	100.229	102.384	100.763	98.7113	102.135	98.0597	99.962	100.091	99.9909	99.5287	100.289	100.298	98.5589	98.8926		99.5801	1.10875			7
98.5043	99.9631	98.2935	99.5629	97.9316	99.1005	100.706	100.221	98.3039	98.5337	100.02	100.11	99.4661	100.165	102.549	99.2361	98.331	98.7377	99.5242	99.2637	98.4831	100.541	102.936	100.377	98.8618	102.824	98.2216	100.863	99.3883	100.317	100.237	100.182	100.779	99.1463	99.0049		99.7339	1.23642			8
98.7889	100.335	98.279	99.7689	98.61	99.4087	100.865	99.8858	98.2861	98.2551	100.194	100.316	98.9816	100.796	103.103	99.7278	99.139	98.2027	99.9991	98.921	98.0856	101.176	102.695	100.53	99.0645	103.4	98.2355	101.068	99.7543	100.148	100.43	100.454	101.006	99.5648	98.5215		99.8856	1.3411			9
291.462	348.284	252.869	339.801	291.556	298.047	315.669	331.996	311.707	303.044	330.58	347.498	283.68	312.48	333.655	358.978	394.053	397.216	306.68	356.455	346.491	422.043	470.555	327.99	379.953	359.345	359.982	342.714	333.447	389.814	355.8	333.956	399.957	344.324	293.522		341.874	42.694			10
387.7	461.144	338.952	453.329	386.607	384.264	409.544	423.817	404.846	389.037	419.115	433.718	349.312	389.312	418.258	447.734	493.866	497.152	381.664	445.698	431.293	521.235	413.472	394.739	449.135	419.156	424.419	408.268	365.926	442.135	420.542	389.419	470.431	406.862	349.508		417.76	40.8764			11
447.377	529.413	396.24	521.343	445.573	438.178	469.769	340.519	465.12	444.817	475.976	493.742	394.464	438.765	476.086	505.338	559.665	559.966	432.449	507.952	488.396	426.16	361.383	441.81	494.803	459.071	470.187	453.994	381.863	471.277	465.958	429.602	518.888	449.327	390.205		458.448	50.2784			12
489.372	576.923	439.967	574.183	244.46	475.211	508.94	345.213	506.74	484.452	515.276	384.591	426.772	474.57	415.156	546.955	600.822	596.375	466.815	550.116	522.719	387.15	355.329	473.308	517.59	485.395	501.358	484.665	392.235	482.586	496.462	457.473	548.431	477.184	418.101		474.94	74.5259			13
521.017	612.955	474.762	613.208	220.936	504.918	536.973	347.866	536.46	516.527	413.468	382.693	451.47	502.036	340.824	577.557	551.909	621.367	494.814	584.207	448.797	354.955	348.474	499.048	533.915	507.338	528.215	510.163	400.508	487.982	523.127	481.684	570.538	498.805	441.059		484.016	87.7201			14
546.892	639.701	336.979	642.708	212.119	527.952	448.865	349.879	561.538	540.116	359.831	379.893	352.305	524.739	315.58	603.269	457.232	641.212	519.452	616.026	340.561	319.743	341.618	523.55	545.546	524.539	553.61	532.846	408.331	493.699	545.057	504.6	439.085	519.603	464.113		475.222	107.467			15
564.458	654.477	295.777	667.042	206.013	544.378	392.021	352.039	579.24	555.581	341.136	378.966	295.918	539.157	302.265	618.572	398.148	655.766	535.832	637.894	275.683	293.12	334.668	540.86	551.758	532.303	568.368	545.982	412.154	498.115	558.517	517.977	344.858	533.263	478.783		471.46	126.641			16
579.889	667.593	261.601	687.393	198.749	548.372	347.208	352.771	593.271	567.629	329.445	378.9	257.154	501.753	290.383	630.758	377.5	665.152	548.795	659.848	216.298	268.807	328.297	555.035	556.347	538.353	580.896	556.648	415.743	502.17	570.094	529.301	293.051	442.309	490.052		465.359	142.405			17
591.587	676.519	243.648	707.276	193.592	391.964	331.38	352.692	602.978	577.682	325.958	379.792	229.091	376.721	285.643	643.577	371.731	583.962	561.887	522.193	184.314	254.603	320.694	568	560.663	545.794	591.177	565.87	418.709	506.56	579.305	537.93	254.147	419.939	498.738		450.18	147.136			18
601.208	684.019	242.488	724.782	187.067	336.161	323.783	352.223	611.378	584.536	321.913	380.949	210.01	324.876	279.355	558.616	368.419	512.648	574.807	514.468	167.456	240.571	313.525	579.084	564.052	551.14	599.619	573.55	420.615	509.5	587.688	545.183	251.494	363.754	504.272		441.863	152.441			19
610.593	692.24	242.55	735.902	183.731	297.189	315.634	353.738	619.522	591.172	312.808	381.496	203.503	287.682	274.068	451.072	364.213	457.578	581.49	511.906	154.574	222.406	307.369	588.944	568.286	556.702	607.374	581.611	423.897	513.564	596.531	551.687	247.628	323.528	509.885		434.916	159.005			20
616.918	697.636	242.11	744.995	178.774	268.899	311.141	355.145	628.017	599.105	314.202	379.952	196.11	257.685	269.201	338.102	360.994	424.171	588.62	510.809	145.045	212.422	302.549	596.533	571.151	560.634	613.408	587.377	425.443	516.866	602.463	557.221	246.46	297.134	513.341		429.447	166.346			21
616.918	697.636	474.762	744.995	445.573	548.372	536.973	423.817	628.017	599.105	515.276	493.742	451.47	539.157	476.086	643.577	600.822	665.152	588.62	659.848	522.719	521.235	470.555	596.533	571.151	560.634	613.408	587.377	425.443	516.866	602.463	557.221	570.538	533.263	513.341		557.505	75.3641

## Sheet: 2
1	2	2	2	2	3	3	3	3	4	4	4	4	4	4	4	4	4	4	5	5	5	5
7	2	4	12	16	9	13	14	16	2	6	11	13	14	15	20	21	23	27	3	4	10	12
100	100	100	100	100	100	100	100	100	100	100	100	100	100	100	100	100	100	100	100	100	100	100		100	5.92634e-15	23		0
99.5802	99.8805	100.054	99.4683	99.7111	99.2362	99.2693	100.287	100.223	101.594	100.59	101.532	99.5394	100.399	100.086	100.069	99.8978	98.9156	99.8188	99.1022	100.071	99.3885	100.202		99.9528	0.653444			1
99.5595	99.6256	99.4476	98.9937	98.9336	98.7505	98.541	99.6315	99.565	101.939	100.906	101.346	98.8361	99.9797	99.991	99.6992	99.5622	97.8723	99.9618	99.7109	101.086	99.7373	99.9353		99.7222	0.907104			2
99.636	99.6308	99.4677	99.0261	99.3352	98.7641	98.5741	98.7901	99.5507	101.712	100.14	101.321	98.0131	100.241	98.7262	99.5399	98.9084	97.6887	100.188	99.1891	101.355	98.5832	100.092		99.4988	1.00018			3
100.249	99.3372	98.7764	98.8279	98.4589	98.3367	98.3237	98.4726	99.2134	101.721	99.6394	100.677	97.9314	99.5276	98.6324	98.9472	98.1742	97.7663	100.581	98.7007	101.72	99.1184	98.9753		99.2221	1.07383			4
100.367	99.5321	98.8124	99.0185	98.2407	98.2619	98.6352	99.0103	99.1139	102.273	99.8549	100.69	97.6679	99.6612	98.4477	98.9204	97.4171	97.5035	100.074	98.81	102.027	98.2708	98.9559		99.1984	1.23355			5
100.206	99.3287	99.1474	99.3066	98.6579	98.4104	98.6332	98.8003	98.7086	101.618	99.5703	100.822	97.6084	99.5292	98.5647	98.5565	97.6926	97.824	100.746	98.1623	102.08	98.4854	98.3183		99.1642	1.17847			6
100.271	99.076	98.7617	99.0714	98.6644	98.2761	98.7183	98.4135	98.974	101.595	99.2177	101.135	97.7752	99.5566	98.7842	98.178	98.3095	98.1947	101.336	98.827	101.946	98.7767	98.4926		99.2327	1.16042			7
100.49	98.9623	98.8158	98.8128	98.6809	98.2902	98.9956	97.9453	98.4908	101.568	98.9521	101.363	98.6114	99.5441	98.872	98.3723	97.9684	98.9662	102.138	98.7357	102.268	98.5783	97.6768		99.2651	1.30677			8
100.55	98.5546	98.6362	98.8184	98.831	98.0952	98.6566	98.5603	98.3182	101.253	99.2279	101.522	98.4376	99.8628	98.8585	98.0951	98.3184	98.7781	102.308	98.0848	102.374	98.7758	98.1544		99.2639	1.32889			9
182.237	209.762	201.7	207.725	198.632	193.589	181.045	164.197	181.447	149.901	171.164	174.267	166.298	207.843	176.115	180.73	172.244	192.911	192.242	161.335	157.697	195.049	157.457		181.547	17.2106			10
229.071	261.475	241.294	254.448	233.672	225.977	218.665	197.84	212.405	182.965	200.747	204.843	194.316	242.104	210.454	213.699	205.634	228.251	223.726	176.046	167.432	206.822	179.769		213.55	24.0342			11
263.591	295.619	272.698	290.209	260.791	252.358	250.188	225.486	236.785	208.89	224.139	227.398	215.619	268.035	234.72	237.288	231.962	254.417	245.513	194.709	183.064	223.889	201.42		239.078	28.1826			12
291.452	327.72	302.309	322.206	286.582	277.176	276.189	244.922	258.057	227.202	242.345	243.442	231.278	290.516	252.385	254.685	251.852	277.109	262.79	208.076	195.772	237.812	216.868		259.945	33.476			13
317.49	359.746	330.75	351.056	311.151	304.726	302.306	265.634	280.296	243.106	262.014	258.573	246.915	316.248	267.016	272.988	270.379	300.237	281.119	219.848	207.596	250.306	231.066		280.459	39.0544			14
340.187	392.816	356.232	374.643	333.47	333.096	328.076	286.601	303.347	259.924	280.527	274.356	262.892	343.909	283.339	292.669	290.132	325.166	301.081	230.845	219.129	261.445	244.737		300.809	44.2411			15
359.908	419.065	375.838	391.888	349.315	359.626	353.206	306.724	326.942	276.031	300.076	290.135	279.604	371.002	299.929	313.239	310.226	348.414	320.144	242.953	229.572	273.523	257.089		319.759	47.7701			16
376.123	441.574	391.658	406.095	362.311	379.696	374.885	324.7	346.733	291.98	317.823	306.505	296.673	395.978	316.83	333.275	328.917	370.53	338.424	253.377	239.134	284.468	268.369		336.785	50.4129			17
390.281	459.097	404.363	417.517	372.995	395.902	393.891	339.525	363.955	307.575	333.293	321.37	312.573	417.661	332.198	351.421	347.816	390.342	354.672	265.982	249.786	296.574	281.865		352.202	51.6017			18
401.824	471.444	411.627	423.995	378.157	406.969	409.169	342.994	376.806	321.438	345.413	333.739	327.481	433.748	346.13	367.999	364.864	406.848	369.062	276.624	259.375	307.829	293.906		364.237	51.7737			19
410.936	482.065	417.995	430.474	384.931	414.991	422.494	316.841	385.741	333.3	354.385	343.529	338.841	445.276	357.414	379.681	378.867	418.953	379.166	286.106	268.255	317.155	303.586		372.651	52.9329			20
417.148	488.953	421.229	434.052	387.549	418.656	431.243	216.104	390.608	342.185	360.999	351.738	347.012	452.41	365.387	388.107	390.445	427.822	386.666	295.036	276.248	325.893	312.839		375.145	60.9861			21
422.274	495.082	423.656	437.149	390.084	422.283	439.075	162.366	394.749	350.494	366.178	358.075	354.817	458.776	372.813	395.071	400.159	435.24	392.413	303.662	284.057	334.668	321.119		378.881	67.8754			22
425.032	497.962	423.652	437.698	389.342	423.881	444.71	112.494	395.974	357.045	369.115	362.514	360.379	462.092	378.317	399.455	407.322	440.356	396.401	310.803	290.03	340.682	327.792		380.567	75.0229			23
428.211	502.775	425.68	440.663	392.953	425.108	448.666	108.448	396.94	361.935	371.705	365.807	364.563	464.687	382.841	402.765	414.419	444.097	399.24	316.765	295.567	346.704	333.158		384.074	75.8588			24
429.28	504.244	424.659	440.595	391.739	425.92	451.773	110.103	396.964	365.656	373.607	368.457	367.069	466.216	385.996	404.223	419.648	446.919	401.375	320.982	300.468	350.956	337.654		386.283	75.3855			25
430.524	506.852	425.348	441.7	394.214	426.762	453.714	111.184	396.661	369.051	374.693	370.594	369.218	466.917	388.75	405.471	423.871	448.87	403.376	325.295	303.996	354.398	340.757		388.357	75.2025			26
431.28	508.932	425.335	443.083	395.368	426.999	455.67	109.496	396.215	371.638	374.377	371.561	370.551	467.593	390.578	405.409	427.867	450.321	403.97	328.841	307.644	358.142	343.586		389.759	75.43			27
431.56	510.075	424.376	442.752	395.082	427.781	457.162	108.626	394.898	373.302	374.655	371.773	371.103	467.435	391.854	405.297	430.732	451.412	403.874	331.3	310.017	360.105	346.245		390.496	75.4623			28
430.713	510.163	421.763	440.588	392.868	427.496	458.486	107.585	394.075	374.627	373.788	371.954	371.639	467.35	392.312	404.558	432.98	451.613	403.221	333.159	311.794	361.305	347.306		390.493	75.3867			29
429.913	512.658	421.462	441.727	394.678	427.52	459.166	105.977	392.852	374.678	373.446	371.638	371.432	467.32	392.891	403.736	434.521	452.105	403.137	334.975	313.688	362.915	348.232		390.899	75.7235			30
428.445	512.661	418.748	439.67	392.419	427.311	460.203	104.986	391.542	375.347	371.771	370.503	370.738	466.741	392.713	402.476	436.554	452.116	402.494	335.537	314.923	363.194	348.604		390.422	75.7404			31
426.942	513.662	417.622	440.065	393.352	427.807	460.326	103.2	389.722	375.516	371.062	370.774	370.487	466.387	392.522	401.302	437.732	452.017	402.15	336.675	315.934	363.339	348.576		390.312	76.0095			32
425.687	512.57	414.076	436.787	390.469	426.83	461.068	101.948	387.996	374.632	369.129	369.912	369.469	465.533	391.562	399.854	438.663	451.774	401.053	336.277	316.201	362.803	347.597		389.213	76.0191			33
423.501	513.363	412.385	436.924	391.301	425.819	460.149	101.006	385.835	374.378	367.319	368.46	368.542	464.222	391.097	398.249	439.233	451.317	399.504	336.541	316.638	362.012	347.597		388.495	76.0688			34
421.318	512.752	409.596	434.799	389.846	425.814	461.191	100.672	383.965	373.832	365.406	367.019	367.235	463.804	390.255	396.518	439.893	450.654	397.558	335.624	316.519	361.051	346.582		387.474	76.0716			35
419.163	513.159	406.932	434.335	389.229	424.399	460.025	99.6108	381.815	373.054	362.855	365.449	365.023	462.473	388.704	394.368	440.125	449.206	396.092	335.007	316.375	359.641	345.111		386.181	76.1509			36
416.519	512.604	403.765	432.232	387.554	423.464	459.602	97.8739	379.696	371.331	360.341	363.574	363.555	461.265	387.423	392.462	440.576	448.899	394.549	334.883	315.792	358.268	343.588		384.775	76.3187			37
414.185	512.249	401.047	430.552	386.42	423.305	459.825	98.0634	377.564	370.323	358.023	362.03	361.679	459.65	385.609	390.054	440.347	447.384	392.4	333.598	315.434	356.6	341.636		383.39	76.2046			38
412.064	511.877	397.458	428.564	384.723	421.374	458.58	96.4994	375.025	368.75	355.736	359.724	359.998	458.379	384.076	388.032	440.07	446.837	390.482	331.797	314.682	354.651	339.667		381.698	76.3625			39
409.165	510.525	394.524	426.1	382.4	420.717	458.888	96.5575	373.018	367.163	353.172	357.247	357.475	456.646	382.288	385.274	440.189	445.282	388.351	330.459	313.554	352.582	337.586		379.964	76.2406			40
406.438	510.037	390.807	424.06	381.018	418.784	457.03	95.2283	370.008	365.971	350.375	354.967	355.017	454.489	380.49	382.516	439.883	444.116	386.107	329.075	312.926	350.384	335.589		378.057	76.2632			41
404.293	508.625	387.69	421.275	378.848	417.896	455.906	94.1224	367.706	363.606	347.65	352.213	352.712	452.802	378.497	379.986	439.415	443.181	384.149	326.926	311.519	348.156	333.066		376.097	76.3346			42
401.097	508.307	384.083	419.099	377.342	416.386	455.386	93.3826	365.672	361.682	344.508	350.02	349.912	450.692	375.717	377.2	438.796	441.427	381.555	324.935	310.281	345.759	330.709		374.085	76.3765			43
398.674	508.307	381.124	416.419	374.651	414.965	454.296	93.35	363.033	359.602	341.432	346.728	347.679	448.577	373.707	374.264	437.716	439.672	379.188	323.343	308.96	343.195	327.932		372.035	76.3153			44
395.585	506.562	377.799	413.643	372.718	413.543	452.971	93.0434	360.32	357.692	338.093	343.893	344.793	447.037	371.143	371.192	437.078	438.308	376.626	320.94	307.322	340.094	325		369.8	76.2555			45
392.872	506.009	374.52	411.003	370.522	411.236	451.219	92.0387	357.397	355.276	335.875	341.352	341.61	444.277	368.543	368.171	435.942	436.054	373.51	318.395	305.815	337.572	322.167		367.451	76.2344			46
389.784	504.761	371.091	408.254	368.1	409.865	449.528	92.0962	354.858	353.256	332.139	338.303	338.867	441.913	366.035	364.911	434.869	434.124	370.772	315.612	304.087	334.993	319.416		365.115	76.0872			47
387.34	503.591	368.055	405.765	365.835	408.017	447.478	91.8024	351.84	350.906	329.231	335.352	335.993	439.748	363.735	361.919	433.915	432.172	368.089	313.46	302.215	331.888	316.691		362.828	75.9946			48
384.599	502.953	364.734	403.185	363.444	405.807	445.536	91.0265	349.109	348.691	325.943	332.366	333.189	437.411	360.744	358.34	432.532	430.076	365.484	310.282	300.776	328.392	313.075		360.335	76.0335			49
381.815	502.27	360.823	400.224	360.499	403.525	442.587	90.4681	346.015	346.312	322.858	329.8	329.74	435.463	357.9	355.325	431.612	428.116	362.531	307.763	299.064	325.315	310.364		357.843	75.9821			50
378.69	501.499	357.259	397.446	358.311	402.257	441.615	90.3313	343.879	343.446	319.503	326.193	326.717	433.158	355.655	351.996	430.199	426.295	359.905	305.413	297.316	321.961	307.065		355.483	75.9929			51
376.217	500.265	354.69	395.112	355.666	400.35	439.26	89.3577	340.921	341.093	316.283	323.212	323.544	431.056	352.245	348.909	428.71	424.242	356.821	303.048	295.587	318.663	303.931		353.008	76.0151			52
373.601	499.597	351.326	392.8	353.588	398.129	437.847	89.0233	338.193	338.323	313.554	320.164	320.513	428.949	349.594	345.476	427.382	422.209	354.082	299.204	293.921	316.125	300.63		350.619	76.0613			53
371.091	498.864	347.997	389.083	350.792	396.308	435.534	89.1256	335.908	335.565	310.01	316.775	316.781	426.914	346.643	342.5	426.217	419.757	350.847	297.355	291.822	312.428	297.291		348.07	75.9824			54
367.972	497.199	344.612	387.165	348.315	394.76	432.683	88.7131	333.353	333.511	306.928	313.513	313.453	424.387	343.491	338.931	424.25	417.337	348.035	294.162	290.322	309.63	294.121		345.515	75.8442			55
365.959	496.716	341.462	384.449	346.121	392.363	430.709	88.6986	330.521	330.538	303.627	310.532	310.4	422.497	340.594	335.529	422.725	415.281	345.047	291.125	288.085	306.316	290.789		343.047	75.8738			56
363.272	496.098	338.308	381.503	343.286	390.431	428.035	88.0009	327.733	328.064	300.405	307.633	307.42	420.465	337.718	332.375	421.296	413.684	342.583	288.343	286.222	302.595	287.282		340.554	75.9651			57
360.505	495.239	335.138	379.282	340.721	388.174	425.71	88.0634	325.057	325.065	296.706	304.419	303.912	417.479	335.261	329.125	419.438	411.168	339.104	285.817	284.271	298.685	283.583		337.91	75.8905			58
357.972	494.318	332.208	376.515	338.132	386.326	423.722	87.5523	322.752	322.6	293.487	301.215	300.718	415.958	331.704	325.99	417.75	409.203	336.465	282.635	282.159	295.868	280.395		335.463	75.9793			59
354.78	493.615	329.052	373.212	335.37	384.291	421.363	87.4742	320.103	319.548	290.112	297.856	297.195	413.922	328.854	322.71	416.22	407.212	333.114	279.319	280.46	292.84	277.345		332.868	75.9839			60
352.421	493.495	326.149	370.937	333.41	382.015	419.362	87.2284	317.216	316.731	286.841	294.721	294.105	411.262	325.594	319.453	414.706	405.026	330.452	276.495	278.394	289.502	273.715		330.401	76.0918			61
350.114	492.234	323.15	368.02	330.5	379.832	417.272	86.556	315.15	314.478	282.883	291.401	290.936	409.043	322.663	316.138	413.253	403.018	327.617	273.719	276.697	285.546	270.751		327.868	76.1669			62
347.268	490.974	320.261	365.533	327.923	377.59	415.621	85.6674	312.451	311.176	280.04	288.048	286.986	407.426	319.998	312.62	410.662	400.769	324.117	271.079	274.545	282.276	267.355		325.234	76.274			63
345.053	490.158	317.53	362.457	325.331	375.799	414.468	86.3838	310.065	308.36	276.709	284.975	283.787	404.765	316.849	309.449	409.574	398.995	321.278	267.951	272.616	279.498	263.24		322.839	76.2952			64
342.171	489.068	314.482	358.755	322.967	373.779	412.271	85.7811	307.561	306.078	273.305	282.075	280.588	402.772	313.937	306.417	407.328	397.453	318.136	264.929	270.897	275.835	260.209		320.295	76.3489			65
340.411	488.664	311.27	356.682	320.546	371.679	410.579	85.6082	305.033	303.037	269.684	278.63	277.393	400.698	310.429	303.279	405.48	395.419	315.009	261.921	268.719	272.827	256.735		317.814	76.5266			66
338.344	488.22	308.708	354.626	317.798	370.075	408.715	84.759	302.543	299.815	266.11	275.571	274.03	398.686	308.096	300.1	404.001	393.163	312.691	259.038	266.875	269.473	253.507		315.432	76.786			67
335.359	487.361	305.638	351.457	315.292	367.455	407.142	85.2494	300.405	297.148	263.463	272.391	270.133	396.277	304.925	296.994	402.123	391.442	309.527	256.315	264.949	266.193	249.758		312.913	76.7736			68
332.878	486.783	303.367	348.965	312.514	365.719	404.543	85.1276	297.965	294.422	260.192	269.41	267.362	394.221	302.279	293.692	400.122	389.708	306.756	253.666	263.207	262.473	245.97		310.493	76.8707			69
331.423	485.844	300.515	346.036	309.811	363.623	403.209	85.0647	295.368	291.475	256.694	265.743	264.356	392.215	299.116	290.625	398.376	387.702	303.747	250.639	261.284	259.217	242.958		308.045	77.0069			70
329.3	485.137	297.742	342.52	307.395	361.552	401.394	84.3597	293.446	288.614	253.156	263.221	260.868	389.615	296.019	287.785	396.772	386.097	300.712	247.657	259.659	256.266	238.527		305.557	77.2194			71
326.976	484.899	295.046	340.172	304.66	359.906	399.25	83.6311	290.812	285.881	249.966	259.481	257.498	387.101	292.594	284.415	394.876	383.682	297.493	244.587	257.581	253.303	234.878		302.986	77.4728			72
324.872	484.401	292.689	337.891	302.891	357.617	397.454	84.2172	288.876	282.848	246.657	256.297	254.708	385.084	289.365	281.22	392.741	382.458	294.956	241.522	255.739	249.695	232.282		300.717	77.5543			73
322.714	483.809	290.178	334.853	299.693	355.849	395.322	83.8367	286.293	280.01	243.469	253.204	251.166	382.322	286.643	278.273	389.945	380.453	291.223	239.116	253.797	246.496	228.06		298.118	77.675			74
320.945	483.715	287.828	332.416	297.548	353.432	393.493	83.6372	283.838	276.659	239.995	250.05	248.026	380.598	283.683	275.239	388.886	378.673	288.66	235.746	251.849	242.987	224.055		295.737	78.0323			75
318.939	483.076	285.175	329.711	294.67	351.271	391.367	83.4525	281.835	274.895	236.557	246.922	245.187	377.875	280.638	272.182	386.657	376.462	285.963	233.02	249.968	240.075	220.482		293.321	78.1099			76
316.96	481.878	282.541	327.165	292.116	349.287	388.997	83.4602	279.564	271.348	233.05	243.943	241.52	375.765	277.583	269.017	384.203	375.079	282.887	230.299	248.02	236.867	216.558		290.787	78.2342			77
314.724	480.897	280.194	323.926	289.557	347.315	387.117	83.1656	277.686	268.67	230.037	240.848	238.727	374.169	274.703	265.832	383.002	373.564	280.717	227.634	246.422	233.727	213.306		288.519	78.4225			78
431.56	513.662	425.68	443.083	395.368	427.807	461.191	342.994	396.964	375.516	374.693	371.954	371.639	467.593	392.891	405.471	440.576	452.116	403.97	336.675	316.638	363.339	348.604

## Sheet: iso
1	1	1	1	1	1	1	1	1	1	2	2	2	2	2	2	2	2	2	2	2	2	2	2	2	3	3	3	3	3	3	3	3	3	3	4	4	4	4	4	4	4	4	4	4	4	4	4	4
1	3	4	5	6	7	8	9	10	14	1	2	3	4	7	8	9	10	11	12	14	15	16	17	18	1	2	3	6	7	8	11	12	13	14	1	2	3	5	6	7	8	9	10	11	12	13	14	15
100	100	100	100	100	100	100	100	100	100	100	100	100	100	100	100	100	100	100	100	100	100	100	100	100	100	100	100	100	100	100	100	100	100	100	100	100	100	100	100	100	100	100	100	100	100	100	100	100
99.9136	100.564	99.9804	100.113	99.9326	100.24	99.3064	99.6083	99.6037	98.9305	99.8348	99.1734	100.06	99.4048	100.045	99.3875	99.4443	100.219	100.1	99.8794	99.7056	99.7082	99.8102	99.7785	99.899	100.453	99.8118	98.8608	98.7986	99.2939	99.955	98.7548	100.128	99.7127	99.7148	100.718	100.052	100.09	99.8743	99.5095	101.986	100.013	99.724	99.012	99.7726	99.4458	100.065	100.432	100.52
98.933	100.7	99.2487	99.3696	99.3277	99.0222	98.5156	98.6985	99.6523	99.3774	99.4485	98.5717	99.3664	99.3235	99.5441	98.0841	99.6429	101.522	100.147	99.7387	98.9256	99.1704	98.8146	99.2807	99.9139	101.645	99.2752	98.9643	99.2637	98.0831	99.9612	99.1832	100.636	99.9312	99.9271	100.306	100.098	99.7468	99.117	99.2974	99.1746	99.1529	98.7257	98.6458	99.4545	99.8572	100.577	99.5846	99.6974
99.6644	101.1	99.7557	100.513	99.4635	98.1542	99.4226	98.9409	100.112	99.08	99.5092	98.9146	100.388	98.8024	99.2136	98.2083	99.7609	102.343	100.198	99.2114	98.8392	98.7627	98.6926	99.2596	99.8327	100.876	99.18	97.9884	99.2234	98.5372	99.7092	98.848	100.492	100.303	99.6904	100.06	99.6068	99.8489	99.0564	98.9711	98.7444	99.1759	99.6551	98.4247	99.3636	99.6317	100.365	99.0261	100.84
100.229	101.268	99.8379	100.259	99.2845	99.3859	99.5055	99.3173	99.9107	98.9603	99.4698	98.4975	100.193	98.563	98.5858	98.0197	99.4495	102.982	100.096	98.9864	98.8457	98.6623	98.6353	99.6948	99.3292	101.56	98.8356	98.2284	99.2233	98.1983	99.9501	98.8451	100.283	100.857	100.403	100.684	100.246	99.5526	99.006	99.4428	99.2285	100.353	99.5131	98.7358	99.6667	100.093	99.8988	98.4481	100.36
100.943	101.55	99.8613	100.611	99.5798	98.2718	100.212	99.7282	100.502	99.0912	98.7588	98.7465	99.5608	98.2625	98.9662	98.0416	100.045	104.158	100.176	98.6318	98.713	98.5152	97.9969	99.7082	99.0606	100.391	98.6308	98.5642	99.2107	98.6385	99.8717	98.9659	99.7941	101.265	100.376	101.589	100.097	99.6635	99.5075	99.819	99.2717	100.254	100.038	99.0229	99.3652	100.487	99.524	98.9723	99.8949
100.341	102.09	99.9973	100.445	99.4168	98.4741	100.267	100.211	100.89	98.7364	99.1752	98.1765	100.469	98.4359	98.4762	98.4283	100.457	103.818	100.095	98.6713	99.0372	98.4348	98.5109	99.3477	99.039	100.709	98.6089	98.5026	98.0122	97.8089	100.315	98.821	99.4764	101.235	101.156	101.568	100.269	99.5113	100.421	99.2741	99.4443	100.191	100.305	99.2232	99.7967	100.949	99.6938	99.3363	99.9225
101.195	102.454	99.8634	100.377	99.3581	98.8951	101.009	99.7055	101.319	98.7428	97.9435	98.9434	99.9188	97.8953	98.3903	98.4992	100.26	104.161	99.8649	98.7785	99.2829	98.1961	98.326	99.2844	98.925	99.9614	98.6989	98.4853	98.5876	98.7095	100.522	99.1034	98.8402	101.089	100.779	101.451	99.944	99.4387	100.264	99.3581	99.645	100.416	100.016	98.6477	98.7403	101.642	99.4695	99.4711	100.397
100.365	103.359	99.894	100.028	99.7838	98.8306	101.279	99.7567	101.954	98.9856	98.3196	98.7958	99.9452	97.7771	98.4812	98.4739	100.526	105.083	100.087	98.6319	99.3623	98.3507	98.3188	98.7772	98.8162	100.305	98.9009	98.4583	99.5604	98.6481	100.242	99.4944	99.4172	101.336	100.682	101.305	99.8654	99.481	100.999	99.6441	99.8853	100.117	100.293	98.5306	99.5722	101.518	99.8454	98.6447	100.625
99.3081	102.958	100.101	100.068	100.123	99.0475	101.284	100.417	102.491	98.7134	98.226	98.9264	99.7098	98.1248	98.4729	98.6352	99.5985	104.852	100.582	99.301	99.785	98.3416	98.1953	98.5071	98.572	100.757	98.6788	98.3618	99.8571	98.6555	100.457	99.6427	99.585	101.329	100.821	101.782	99.7539	99.4396	101.386	99.974	99.5626	100.282	100.235	98.682	99.5424	102.17	99.7872	99.4829	100.827
103.469	106.14	103.105	101.915	102.907	103.932	103.336	102.175	107.45	103.308	101.312	102.764	103.261	100.831	102.318	102.033	102.1	108.545	103.605	101.71	103.464	100.246	101.125	103.673	101.96	104.006	102.12	102.178	102.576	101.772	103.322	102.608	102.026	104.197	104.584	104.135	101.389	102.155	104.937	102.837	102.657	102.619	102.864	101.492	101.942	107.605	100.937	103.802	103.69
102.494	105.722	102.972	101.562	102.58	103.413	102.513	102.344	107.545	103.565	100.695	102.551	102.884	100.962	102.935	101.663	101.649	108.608	103.738	102.099	103.338	99.4248	101.145	103.743	101.623	103.093	101.528	101.64	102.238	100.437	103.263	102.348	102.127	103.742	103.42	104.271	101.561	101.842	105.511	102.516	102.778	102.245	103.131	101.956	102.167	107.675	101.384	103.994	103.715
102.971	105.891	103.018	100.676	103.071	103.389	101.726	102.359	108.406	103.044	100.457	101.586	102.343	100.501	102.41	102.12	102.205	109.432	104.422	101.712	103.475	99.7813	100.934	103.892	101.824	103.615	102.065	102.332	102.591	100.469	103.344	103.574	102.267	104.626	103.761	104.068	101.534	101.658	104.891	102.487	102.949	102.658	103.265	101.847	101.802	107.772	100.967	103.397	103.257
102.437	106.656	102.439	100.771	102.724	103.749	102.102	102.99	109.757	102.863	100.653	102.362	101.125	100.258	102.683	102.468	102.244	109.515	105.089	101.828	103.586	99.7379	101.178	103.3	102.05	103.871	101.659	102.55	102.275	100.79	103.698	102.637	102.447	103.811	104.004	104.106	101.01	101.677	105.657	102.589	102.882	102.403	102.995	101.693	102.207	107.73	100.428	104.204	103.175
102.337	106.669	102.211	100.322	103.233	107.574	102.188	102.997	110.994	102.426	100.5	102.795	100.773	100.023	102.5	101.342	102.059	109.451	105.533	101.404	103.893	99.7596	101.206	103.222	102.015	103.718	101.713	102.384	101.776	100.462	102.94	102.728	102.568	103.52	103.007	104.25	101.089	101.648	105.612	102.521	102.891	101.501	102.99	102.039	102.216	107.687	99.5993	104.218	103.437
102.18	106.537	102.462	100.006	102.789	107.404	102.377	103.213	111.771	102.455	100.625	102.573	100.521	100.755	102.977	101.695	100.985	109.936	106.065	101.465	103.283	99.6131	101.382	103.125	101.876	103.695	101.925	102.918	102.211	100.491	103.596	102.894	102.255	103.612	103.443	104.19	101.167	101.291	105.735	103.365	102.752	102.592	103.444	102.52	102.321	108.191	99.9728	104.222	103.52
101.763	106.685	102.159	99.0416	102.8	107.447	103.119	103.486	113	102.449	100.638	102.608	100.621	99.8529	102.177	101.669	101.746	109.633	105.846	101.244	103.607	99.7372	101.428	102.802	101.599	103.277	101.85	102.641	101.414	100.121	103.66	102.253	102.497	103.347	103.134	103.809	100.969	101.483	105.563	102.862	102.902	101.798	103.059	102.089	102.394	107.984	99.2668	103.998	103.037
102.466	106.768	102.118	98.9077	102.858	107.46	102.879	103.665	113.345	101.689	99.8501	102.626	99.9103	99.7981	101.714	100.886	101.263	110.155	105.829	100.533	103.695	99.5642	101.236	102.857	101.273	103.775	101.941	101.805	101.079	99.6262	102.957	102.74	102.758	103.497	103.301	103.665	100.768	101.086	105.742	102.473	102.979	102.283	103.318	102.144	102.744	107.928	98.9472	104.176	103.189
102.176	107.005	101.622	98.3687	102.935	107.915	103.606	103.344	113.819	101.179	100.102	102.654	98.7863	99.5839	101.467	100.98	101.111	109.829	105.944	101.21	104.923	99.5531	101.787	102.859	101.981	103.154	101.733	102.175	101.1	99.8091	102.95	102.555	102.821	102.6	102.903	103.559	100.72	101.748	105.562	102.343	102.64	101.63	102.921	101.989	102.836	108.444	98.0181	104.074	103.148
101.149	107.123	101.994	98.0259	102.53	107.885	103.282	103.329	114.393	101.011	100.325	102.71	98.8496	99.3289	101.007	100.154	101.115	110.022	105.713	99.9757	105.14	99.2776	101.361	103.158	101.314	103.69	101.664	102.174	100.746	99.0534	102.816	102.976	102.908	102.684	102.837	103.092	100.703	101.497	105.497	102.318	102.839	101.323	103.103	101.555	102.691	108.338	98.5046	103.694	102.866
101.288	107.03	101.696	97.2587	102.784	107.469	103.693	103.072	115.27	100.702	99.6088	102.512	98.7479	99.4462	101.006	100.343	100.385	110.131	105.333	99.5638	104.978	99.6859	101.939	102.065	100.981	103.784	102.328	102.222	100.718	99.1574	102.594	102.728	103.16	102.434	103.436	102.687	100.176	101.387	105.263	102.479	102.399	101.473	102.89	101.137	102.729	108.68	97.9662	103.773	103.157
100.515	107.189	101.673	97.3332	102.565	106.835	103.502	103.184	115.946	100.1	99.3649	102.389	98.5822	99.0196	100.821	99.65	100.709	109.918	105.032	99.192	105.566	99.7319	101.903	102.292	101.652	103.07	101.833	102.367	100.741	98.7106	102.553	102.312	103.228	102.585	102.448	102.963	100.493	100.875	105.523	102.178	102.218	101.314	103.295	100.635	102.398	108.282	97.3311	104.135	102.338
100.587	107.253	100.676	97.0238	101.991	108.408	103.863	103.301	116.247	99.0441	99.5156	102.854	98.429	99.1935	100.519	100.339	101.455	110.171	105.464	99.7345	105.94	99.531	101.775	102.607	101.467	102.56	101.637	102.125	100.485	98.5963	102.724	103.289	102.954	102.517	102.316	102.7	100.4	100.718	105.492	102.565	102.409	101.056	103.177	100.625	102.265	107.958	97.0091	103.599	102.469
100.931	107.559	101.083	96.0157	102.091	107.912	103.842	102.62	117.343	98.9065	99.3861	102.911	98.1695	98.8558	100.531	99.6177	99.964	110.271	104.396	99.3134	106.25	99.2605	102.086	102.049	101.615	102.647	102.215	102.293	100.532	98.4181	102.828	102.168	102.724	102.747	102.062	101.876	100.062	100.377	105.2	102.489	101.901	101.195	102.96	100.467	103.821	107.806	96.8476	103.755	102.19
100.114	107.954	100.565	95.6889	101.715	108.042	104.186	103.167	117.69	98.284	100.142	102.177	97.1429	97.9727	100.099	99.4471	99.9784	109.707	104.113	98.721	106.365	98.9773	101.994	101.487	101.363	102.6	102.099	101.536	100.538	98.8594	102.281	102.239	103.136	102.046	102.32	101.878	100.059	100.71	105.339	102.624	102.132	100.824	103.187	99.8223	103.488	107.33	96.6114	103.857	101.678
99.4905	108.131	100.65	94.9089	101.723	108.104	104.334	103.074	117.995	98.2223	100.14	102.383	96.7526	98.193	99.197	99.9586	100.561	109.94	103.869	98.8775	107.671	99.1363	102.195	101.477	101.374	102.884	102.353	101.701	100.148	98.242	102.229	102.75	102.871	102.935	102.131	101.888	99.6478	100.146	105.051	102.439	102.021	100.691	103.274	99.4242	103.167	107.303	95.7248	103.546	102.739
100.271	108.196	99.8493	94.5085	101.551	108.733	104.437	102.945	118.311	97.4739	99.9432	103.105	96.4493	97.925	99.5202	99.3804	99.4279	109.176	103.782	98.0041	107.937	99.0074	101.811	101.659	101.024	102.238	102.156	101.662	99.8059	97.9664	102.776	101.944	103	102.076	102.367	101.505	99.3244	99.9757	105.044	102.56	102.005	100.818	102.745	98.6795	103.904	106.831	95.8587	103.526	102.325
99.607	107.969	99.9648	93.7578	101.884	107.847	104.237	102.655	118.442	97.3977	100.126	102.599	96.1578	98.2459	98.9021	99.2148	99.8513	109.273	104.151	97.4078	107.726	98.725	101.943	100.827	101.157	102.507	101.957	101.531	99.5863	98.5233	102.286	102.608	103.012	102.121	101.642	101.33	99.6142	100.511	104.828	102.062	101.711	100.827	102.896	99.492	103.485	107.198	95.0241	103.335	102.048
[truncated: 4 more columns]

## Sheet: all bursted raw absolute
0	1	1	1	1	1	1	2	2	2	2	3	3	3	3	3	3	3	3	4	5	5	5	5	5	5	5	5	5	5	1	1	1	1	2	2	2	2	2	2	3	3	3	3	3	3	3	3	3	3
	1	2	3	4	5	6	1	2	3	5	1	4	5	6	7	8	10	11	5	1	2	3	5	6	7	9	10	11	12		5	8	11	1	2	4	8	11	12	1	4	5	6	7	8	10	11	12	13
	972.871	1678.39	1089.82	886.216	1031.81	1305.66	1365.19	1145.33	1093.77	1295.47	1414.36	1507.33	1104.83	1328.36	985.519	1201.5	1542.95	1369.34	1199.73	1108.73	933.617	850.614	847.442	1182.32	651.592	508.07	1016.18	1024.53	696.835		1193.14	1319.54	1140.33	1505.09	1570.3	1148.59	1430.89	913.255	1518.91	1363.52	1543.43	1512.38	2682.73	1823.47	1518.67	1518.7	1320.09	1102.28	868.045
	970.756	1676.11	1074.42	888.209	1031.11	1294.06	1365.6	1148.59	1095.85	1285.51	1390.92	1500.12	1083.99	1313.84	974.206	1200.98	1536.69	1364.54	1187.89	1095.91	927.334	834.535	849.433	1172.27	648.347	503.852	1020.24	1027.16	694.601		1188.41	1320.82	1140.26	1498.85	1573.16	1148.98	1421.13	907.799	1503.85	1348.79	1555.95	1511.67	2660.17	1821.15	1509.22	1508.43	1308.27	1095.21	868.196
	961.073	1678.63	1064.38	873.837	1041.85	1286.93	1360.14	1148.7	1095.21	1265.46	1373.76	1489.82	1085.35	1297.54	965.9	1202.16	1541.85	1362.75	1177.16	1079.76	921.829	823.003	841.353	1168	651.058	506.639	1023.58	1017.55	690.543		1179.69	1322.19	1140.21	1489.37	1566.51	1141.53	1411.49	909.297	1501.63	1346.5	1549.03	1514.9	2643.14	1819.16	1501.92	1496.68	1294.98	1088.23	859.846
	974.1	1658.29	1059.1	877.228	1044.49	1284.69	1361.12	1132.2	1098.6	1253.17	1358.72	1482.13	1078.56	1283.14	973.241	1203.42	1546.25	1351.52	1175.27	1065.29	912.992	819.982	843.9	1171.96	650.031	505.738	1030.57	1025.18	683.424		1177.89	1312.8	1135.27	1494.57	1570.14	1142.92	1408.55	913.153	1491.82	1337.08	1555.98	1512.16	2634.42	1811.91	1497.13	1487.73	1296.49	1089.07	858.861
	971.587	1651.3	1044.39	868.594	1027.34	1285.24	1360.78	1129.1	1089.57	1236.91	1339.16	1482.57	1083.32	1283.12	973.785	1202.57	1547.8	1336.81	1164.64	1066.87	909.881	810.631	840.145	1168.2	649.217	499.654	1037.29	1027.9	680.007		1168.95	1300.37	1130.61	1490.4	1567	1150.94	1398.76	915.567	1491.85	1340.84	1554.35	1509.29	2624.53	1819.05	1488.06	1484	1298.59	1085.26	855.697
	973.468	1644.33	1034.58	866.272	1043.89	1283.34	1348.15	1135.62	1101.66	1220.09	1323.26	1476.12	1092.52	1281.64	979.79	1182.75	1560.92	1335.58	1157.56	1055.42	907.654	815.393	839.56	1183.46	641.64	507.014	1044.76	1029.99	675.531		1166.83	1302.09	1124.82	1488.81	1577.09	1154.63	1406.77	911.209	1481.19	1335.05	1544.19	1515.64	2616.59	1827.01	1494.34	1475.88	1292.69	1086.92	853.666
	968.659	1646.08	1032.73	872.822	1032.15	1279.45	1359.84	1121.19	1098.37	1211.2	1317.64	1472	1092.54	1281.41	970.98	1190.84	1554.91	1323.45	1165.28	1058.29	909.054	804.893	838.143	1176.09	644.523	507.809	1043.33	1023.65	674.379		1170.27	1302.53	1125.5	1491.52	1577.69	1152.52	1403.51	911.434	1487.15	1325.33	1550.51	1520.02	2603.69	1841.36	1483.67	1473.21	1285.79	1080.67	847.594
	976.495	1649.89	1019.78	868.74	1053.02	1274.78	1358.59	1129.19	1091.49	1188.04	1296.64	1470.48	1089.49	1277.69	975.789	1205.53	1567.75	1320.93	1152.15	1051.58	913.403	803.389	832.404	1190.85	645.927	516.763	1051.86	1028.4	672.457		1176.44	1294.8	1124.07	1490.76	1578.43	1151.72	1399.72	909.18	1481.54	1330.62	1543.21	1514.13	2609.76	1858.09	1486.11	1464.09	1278.55	1085.12	855.259
	976.522	1650.3	1022.55	871.268	1045.59	1276.2	1358.57	1130.08	1093.16	1181.49	1279.72	1467.05	1090.09	1287.43	982.794	1200.63	1576.21	1325.35	1152.87	1049.15	908.918	796.201	840.889	1186.9	637.961	514.828	1060.17	1023.86	666.328		1170.05	1297.02	1116.75	1491.56	1581.38	1151.13	1399.02	913.441	1484.55	1327.38	1535.19	1514.88	2601.11	1869.96	1480.13	1462.29	1275.86	1093.86	853.557
	982.857	1652.49	1006.74	875.356	1049.25	1275.9	1360.89	1123.17	1101.26	1170.54	1273.32	1471.97	1082.89	1286.62	989.032	1198.74	1571.43	1324.76	1160.98	1051.44	908.598	794.88	832.153	1201.89	641.502	508.567	1061.11	1027.82	668.643		1165.27	1296.83	1124.48	1496.2	1583.88	1147.28	1398.58	915.024	1479.57	1314.76	1527.71	1524.41	2592.34	1880.05	1482.83	1453.19	1275.62	1099.28	860.572
	988.993	1657.24	1002.38	867.132	1048.86	1274.05	1362.96	1123.84	1102.21	1172.39	1273.7	1470.92	1096.06	1287.05	987.66	1203.41	1589.38	1323.78	1148.89	1044.34	917.293	795.074	844.559	1195.67	650.847	518.763	1075.82	1022.35	654.047		3642.83	3336.7	3324.71	4485.89	4956.94	3813.27	4545.92	3019.04	4474.98	4022.59	4378.4	4725.88	9830.01	6084.11	4341.71	4609.09	4506.83	3956.95	3420.56
	3873.85	5354.8	3576.76	2630.34	3598.24	3777.75	3762.5	3323.1	4576.46	4209.06	5133.86	5726.97	4943.04	4990.26	4836.78	4942.47	6179.5	5183.88	5602.43	5184.77	4647.15	3857.13	3986.51	5716.37	3359.81	2608.39	5156.25	5274.77	2932.85		4822.34	4472.6	4408.6	5783.54	6431.05	4867.91	5886.99	3827.59	5766.67	5027.27	5391.37	5887.87	12186.6	7626.82	5422.03	5777.4	5650.55	4935.29	4286.98
	5276.25	7346.73	4984.28	3716.35	5142.25	5187.23	4904.6	4297.15	5950.48	5868.58	6828.72	7139.59	6251.27	6376.16	6093.33	6282.7	7756.75	6596.85	6565.06	6236.96	5596.11	4599.11	4804.58	6741.28	3874.15	3105.9	6146.51	6255.51	3562.77		5525.24	5228.53	5081.02	6595	7376.77	3911.16	6746.72	4346.88	6623.92	5682.99	6088.26	6635.79	13709	8681.31	6154.48	6574.51	6391.31	5570.25	4858.14
	6225.09	8655.5	5854.43	4497.09	6192.16	6113.2	5689.29	5010.04	6830.09	6937.91	7936.02	8034.82	7111.71	7220.24	6940.75	7148.97	8879.11	7521.45	7048.04	6903.45	6232.59	5136.24	3609.52	7358.23	4173.78	3429.31	4967.56	5221.28	3283.11		5102.11	5805.53	2787.66	7152.37	7991.86	3965.07	7323.55	4705.79	7264.39	4812	6586.91	7177.29	14742.8	7570.27	6670.87	7140.9	6860.34	6028.99	5215.4
	6925.33	9644.9	5277.12	5056.28	4748	6815.42	6304.64	5559.55	5556.85	6533.86	6988.25	6103.01	7705.18	7893.63	7471.55	7668.36	7969.96	8099.85	7361.51	7366.31	6677.5	5478.18	2843.77	7746.5	4352.82	2103.28	4369.88	4667.08	3356.53		4198.67	6264.66	2519.4	7599.5	8432.07	3995.54	5868.16	3776.02	7725.07	3146.88	6968.11	7592.69	15481.2	6214.83	7112.81	7608.24	7205.79	6366.3	4790.82
	7463.11	10453.1	5303.9	4373.55	4012.64	7337.65	6797.17	5319.59	2790.81	5508.01	6035	4920.54	3626.38	8314.86	5508.18	5062.51	6319.69	6762.57	5935.57	7678.17	7016.35	5767.02	2522.79	5215.66	4467.44	1677.57	3736.93	4333.4	3438.21		3849.66	4446.56	2418.87	7946.18	7048.51	4018.66	4852.8	3286.17	8052.6	2622.82	5437.57	7936.03	16024.8	5754.52	7483.22	8023.02	7480.14	6649.73	3968.98
	7795.4	9923.26	4575.7	3648.44	3613.62	7732.43	7133.59	4607.56	2126.84	5193.7	5698.47	4498.27	2415.01	8617.25	4813.94	4718.74	5622.23	5515.95	4944.07	6747.46	7222.49	5066.36	2375.56	4596.96	3639.7	1549.38	3185.03	4063.84	2800.92		3698.79	3902.88	2349.23	8193.4	6155.9	4043.47	4337.31	3115.44	8305.84	2464.29	4567.27	8154.09	16408	5511.73	7735.82	8310.42	7668.48	6818.4	3456.11
	8013.2	8805.5	4276.53	3227.19	3267.96	8030.89	6093.96	4131.05	1769.68	4959.12	5461	4294.8	1985.24	7921.48	4525.47	4528.19	5397.27	4729.55	4301.43	5973.63	6567.53	5116.41	2276.86	4270.09	3030.15	1517.61	2831.03	3881.09	2595.17		3592.93	3451.92	2266.4	8253.52	5452.19	4051.89	3970.68	3008.68	8514.64	2388.1	3968.98	7588.4	16649.3	5295.06	7963.65	8554.46	7806.21	6952.73	3276.87
	8209.39	8049.09	3931.56	2862.21	3018.55	8298.12	5379.37	3761.57	1493.9	4705.61	5166.43	4109.63	1718.82	7095.76	4350.52	4380.77	5181.77	4169.68	3904.19	5351.63	5788.42	5134.06	2151.46	4011.08	2768.78	1484.36	2550.32	3714.75	2480.5		3511.03	3215.03	2207.6	5899.43	5203.65	4050.98	3650.43	2976.83	8700.92	2336.22	3535.85	5697.44	16992.7	5208.63	8231.93	8809.21	7981.6	7094.03	3226.79
	7133.65	7697.63	3625.45	2637.92	2819.12	7354.79	4829.84	3442.8	1379.83	4438.77	4881.36	3939.73	1543.21	6178.32	4173.55	4229.26	4978.59	3694.69	3561.95	4997.14	5100.91	5109.49	1961.75	3705.59	2580.7	1454.76	2342.69	3555.45	2368.35		3457.4	3199.71	2133.19	5059.54	5084.35	4045.59	3519.31	2939.88	8894.61	2296.58	3241.35	4913.35	17181.2	5093.96	8418.64	8975.11	8052.45	6157.52	3198.05
	5832.52	7419.55	3404.07	2455.15	2659.84	6308.33	4452.32	3187.51	1309.95	4187.51	4608.61	3729.24	1470.78	5446.11	4055.85	4089.8	4782.71	3338.87	3269.82	4778.03	4688	4345.48	1829.84	3481.05	2375.73	1436.78	2187.36	3418.93	2315.49		3433.98	3200.54	2095.14	4472.98	4956.39	4062.99	3401.23	2856.74	9047.51	2259.76	3140.92	4350.84	17368.4	4997.57	8618.24	9146	8163.03	4972.09	3161.53
	5267.64	7172.71	3259.64	2299.9	2527.34	5082.26	4201.98	2942.97	1239.17	3951.37	4336.15	3592	1404.77	4941.19	3926.77	3939.67	4583.56	3078.78	3107.99	4572.33	4391.69	3587.16	1805.3	3318.31	2294.47	1401.2	2051.32	3301.32	2263.01		3406.03	3194.72	2038.62	4047.19	4885.84	4079.14	3327.99	2869.47	6597.75	2229.54	3026.81	3897.16	17494.5	4908.8	8769.15	9300.19	8263.95	3726.84	3133.59
MAX	8209.39	10453.1	5854.43	5056.28	6192.16	8298.12	7133.59	5559.55	6830.09	6937.91	7936.02	8034.82	7705.18	8617.25	7471.55	7668.36	8879.11	8099.85	7361.51	7678.17	7222.49	5767.02	4804.58	7746.5	4467.44	3429.31	6146.51	6255.51	3562.77		5525.24	6264.66	5081.02	8253.52	8432.07	4867.91	7323.55	4705.79	9047.51	5682.99	6968.11	8154.09	17494.5	8681.31	8769.15	9300.19	8263.95	7094.03	5215.4
	8209.39	10453.1	5854.43	5056.28	6192.16	8298.12	7133.59	5559.55	6830.09	6937.91	7936.02	8034.82	7705.18	8617.25	7471.55	7668.36	8879.11	8099.85	7361.51	7678.17	7222.49	5767.02	4804.58	7746.5	4467.44	3429.31	6146.51	6255.51	3562.77		5525.24	6264.66	5081.02	8253.52	8432.07	4867.91	7323.55	4705.79	9047.51	5682.99	6968.11	8154.09	17494.5	8681.31	8769.15	9300.19	8263.95	7094.03	5215.4
[truncated: 89 more columns]

## Sheet: statistics
Vmax/Vi	Bin Center	Count
8.4383	3.25	1
6.2281	3.75	0
5.3719	4.25	3
5.7055	4.75	8
6.0013	5.25	15
6.3555	5.75	11
5.2254	6.25	13
4.8541	6.75	9
6.2445	7.25	0
5.3555	7.75	2
5.611	8.25	1
5.3305
6.9741
6.4871
7.5813
6.3823
5.7546
5.9151
6.136
6.9252
7.736
6.7798
5.6695
6.552
6.8562
6.7497
6.0487
6.1057
5.1128
4.6308
4.7476
4.4557
5.4837
5.3697
4.2382
5.1182
5.1528
5.9566
4.1679
4.5147
5.3916
6.5212
4.7609
5.7742
6.1238
6.2602
6.4358
6.0082
6.6515
5.8862
5.8346
5.1285
5.2272
5.2123
4.7055
5.964
5.3273
6.8093
4.5061
4.5385
5.7054
5.3326
3.4299
