# Supplementary material for: A mechano-osmotic feedback couples cell volume to the rate of cell deformation
Source: eLife journal article supplement (doi:10.7554/elife.72381), 2022-04-13
Supplement: supp [file traction_forces.xlsx]

## Sheet: control_ec
7.27521e-45	1.17998e-44	0	2.59394e-44	7.21618e-44	6.41445e-44	2.05687e-43	2.66119e-47	1.71703e-43			0	6.20819e-44	7.24863e-44
4.98504e-17	1.34948e-16	1.3259e-16	3.89379e-17	5.16986e-17	2.18964e-17	2.89525e-17	5.39252e-17	3.00667e-16			1	9.0385e-17	8.40409e-17
1.04113e-16	6.74654e-17	7.68695e-16	6.73675e-17	4.17047e-17	3.50869e-17	3.00267e-17	4.54455e-17	1.06767e-16			2	1.40741e-16	2.23578e-16
2.3084e-17	4.33907e-17	1.90759e-16	4.54791e-15	4.4544e-17	2.74637e-17	3.54767e-17	1.1607e-16	1.44356e-16			3	5.74784e-16	1.40583e-15
6.57605e-17	6.14522e-17	1.94854e-16	4.63612e-17	6.59933e-17	3.79353e-17	2.86276e-17	4.60518e-17	6.9172e-17			4	6.84676e-17	4.6604e-17
7.70209e-17	1.1106e-16	1.66236e-16	9.01322e-17	5.74439e-17	4.40201e-17	3.42944e-17	5.15397e-17	9.99772e-17			5	8.13027e-17	3.88717e-17
1.50556e-16	8.55369e-17	2.68402e-16	9.55586e-17	7.99885e-17	4.07207e-17	4.23134e-17	5.21037e-17	8.71277e-17			6	1.00256e-16	6.73676e-17
8.01956e-17	2.87668e-16	4.62079e-16	5.03303e-17	5.22422e-17	2.48357e-17	3.04916e-17	5.71471e-17	9.52264e-17			7	1.26691e-16	1.40392e-16
5.91603e-17	1.40606e-16	6.96508e-16	8.13115e-17	9.59134e-17	5.22155e-17	5.3599e-17	4.73368e-17	8.98726e-17			8	1.4628e-16	1.96509e-16
1.34665e-16	1.26578e-16	2.33092e-15	5.38907e-17	8.02826e-17	2.77841e-17	5.02401e-17	6.13404e-17	1.03536e-16			9	3.29915e-16	7.08274e-16
1.2277e-16	8.76759e-17	3.25965e-15	4.46765e-17	8.74216e-17	6.43115e-17	5.04667e-17	4.98411e-17	7.77865e-17			10	4.27177e-16	1.0017e-15
8.42672e-17	2.76406e-16	1.18012e-15	2.22106e-16	9.03704e-17	4.57203e-17	6.77839e-17	5.982e-17	1.01209e-16			11	2.36423e-16	3.41749e-16
6.65237e-17	1.64297e-16	1.54162e-15	8.93714e-16	8.03859e-17	5.4046e-17	7.38618e-17	5.79115e-17	1.04831e-16			12	3.37465e-16	4.95644e-16
4.4948e-17	2.49592e-16	1.83912e-15	2.71013e-16	1.12733e-16	8.32257e-17	9.76792e-17	6.65751e-17	1.46189e-16			13	3.23453e-16	5.40937e-16
1.07959e-16	1.68666e-16	2.1086e-15	8.2799e-17	1.41539e-16	1.22376e-16	9.82863e-17	8.14556e-17	1.07568e-16			14	3.35472e-16	6.27442e-16
1.15573e-16	2.03543e-16	6.66008e-15	1.32138e-16	1.57604e-16	1.54894e-16	1.02968e-16	7.33791e-17	1.18479e-16			15	8.57628e-16	2.05177e-15
1.0354e-16	2.01018e-16	3.13429e-15	9.59614e-17	1.16425e-16	2.05297e-16	1.82808e-16	7.36232e-17	1.67698e-16			16	4.75629e-16	9.41085e-16
9.33547e-17	1.32988e-16	4.368e-15	8.46888e-17	1.08242e-16	2.42563e-16	1.61626e-16	7.89378e-17	1.22486e-16			17	5.99209e-16	1.33331e-15
1.50236e-16	2.3832e-16	3.10331e-15	1.23607e-16	1.44015e-16	2.86763e-16	1.66896e-16	1.06103e-16	1.52629e-16			18	4.96876e-16	9.23075e-16
1.41061e-16	2.48982e-16	3.1571e-15	1.33478e-16	1.257e-16	3.4372e-16	2.24829e-16	8.20851e-17	1.59692e-16			19	5.12961e-16	9.37821e-16
1.00399e-16	2.5164e-16	4.03905e-15	2.54369e-16	1.53811e-16	3.99375e-16	2.10132e-16	1.55068e-16	2.06379e-16			20	6.41136e-16	1.204e-15
1.25869e-16	2.37664e-16	4.98185e-15	1.39142e-16	1.63951e-16	4.37738e-16	2.4956e-16	1.28246e-16	1.60097e-16			21	7.36013e-16	1.50399e-15
1.6368e-16	2.40485e-16	4.30594e-15	1.22239e-15	1.58644e-16	5.97137e-16	2.67846e-16	1.62492e-16	1.69618e-16			22	8.09804e-16	1.27918e-15
1.05555e-16	4.18307e-16	4.28932e-15	3.17171e-16	1.84609e-16	6.68025e-16	3.39423e-16	2.07112e-16	1.68264e-16			23	7.44199e-16	1.26347e-15
1.44962e-16	2.80884e-16	4.5275e-15	2.35157e-16	1.75605e-16	6.9019e-16	3.54563e-16	2.61111e-16	1.68522e-16			24	7.59833e-16	1.3411e-15
1.59402e-16	2.52815e-16	4.89276e-15	3.23005e-16	1.43196e-16	7.5978e-16	4.05856e-16	3.42046e-16	2.08096e-16			25	8.31884e-16	1.44635e-15
1.9454e-16	3.24082e-16	4.55217e-15	3.49059e-16	1.76783e-16	8.02261e-16	4.29497e-16	3.51075e-16	2.30267e-16			26	8.23304e-16	1.33008e-15
2.01152e-16	3.21157e-16	4.48294e-15	4.2959e-16	2.25404e-16	8.05304e-16	4.65621e-16	3.20366e-16	3.39222e-16			27	8.43417e-16	1.29771e-15
1.21463e-16	2.50286e-16	4.82682e-15	5.67352e-16	2.14161e-16	9.64535e-16	6.72222e-16	3.25434e-16	3.16554e-16			28	9.17648e-16	1.40448e-15
3.59995e-16	2.72774e-16	9.07119e-15	4.44073e-15	1.7927e-16	8.41996e-16	6.56053e-16	3.70257e-16	3.72479e-16			29	1.84053e-15	2.85132e-15
1.65541e-16	2.77116e-16	9.6317e-15	5.75496e-16	2.56763e-16	8.86665e-16	7.58353e-16	4.57475e-16	3.93736e-16			30	1.48921e-15	2.88746e-15
1.79141e-16	2.74981e-16	4.59592e-15	4.80595e-15	2.14358e-16	8.20652e-16	9.13865e-16	4.06831e-16	4.21161e-16			31	1.40365e-15	1.77928e-15
2.15046e-16	2.61914e-16	5.04091e-15	7.08973e-16	2.85586e-16	8.96054e-16	1.01239e-15	5.05281e-16	4.40967e-16			32	1.04079e-15	1.43907e-15
2.2696e-16	3.07751e-16	9.6413e-15	5.72841e-16	2.84311e-16	9.84557e-16	1.10537e-15	5.43915e-16	5.0939e-16			33	1.57515e-15	2.86602e-15
2.1126e-16	2.9513e-16	5.26679e-15	5.55094e-16	2.98865e-16	1.11895e-15	1.24422e-15	4.57463e-16	6.72864e-16			34	1.12452e-15	1.50368e-15
2.81123e-16	3.04471e-16	5.10299e-15	6.44198e-16	2.79762e-16	1.13183e-15	1.27155e-15	5.40407e-16	7.08521e-16			35	1.14054e-15	1.44106e-15
1.93524e-16	3.13836e-16	1.03599e-14	8.2134e-16	3.7012e-16	1.21217e-15	1.31588e-15	5.63679e-16	6.93711e-16			36	1.76047e-15	3.06199e-15
2.69112e-16	4.61453e-16	5.37055e-15	6.58193e-16	3.25421e-16	1.3052e-15	1.39419e-15	6.18501e-16	7.59961e-16			37	1.24029e-15	1.50665e-15
3.15615e-16	2.37181e-16	5.20545e-15	7.9131e-16	4.09368e-16	1.2383e-15	1.40718e-15	6.09907e-16	9.24103e-16			38	1.2376e-15	1.453e-15
2.9241e-16	2.78008e-16	5.32228e-15	7.66725e-16	3.73775e-16	1.41395e-15	1.62589e-15	5.96458e-16	1.02456e-15			39	1.29934e-15	1.49335e-15
3.31317e-16	3.49194e-16	1.0777e-14	8.7566e-16	3.77041e-16	1.53389e-15	1.74077e-15	6.5258e-16	1.11852e-15			40	1.97289e-15	3.1502e-15
3.26579e-16	4.47116e-16	5.30742e-15	7.9941e-16	3.27175e-16	1.6325e-15	1.74034e-15	7.47237e-16	1.09764e-15			41	1.3806e-15	1.47286e-15
3.14582e-16	4.25826e-16	4.82237e-15	8.14651e-16	3.89522e-16	1.84155e-15	1.89097e-15	7.07598e-16	1.09621e-15			42	1.36703e-15	1.3417e-15
3.95415e-16	4.03512e-16	4.87674e-15	6.92975e-16	4.14536e-16	2.00732e-15	1.90632e-15	6.47123e-16	1.1769e-15			43	1.3912e-15	1.36634e-15
3.62521e-16	3.9341e-16	4.87043e-15	7.14737e-16	5.52123e-16	2.2528e-15	2.21713e-15	7.4184e-16	1.47663e-15			44	1.50907e-15	1.37635e-15
4.27203e-16	3.85612e-16	5.05519e-15	8.43913e-16	6.49617e-16	2.2941e-15	2.41402e-15	7.98134e-16	1.41984e-15			45	1.58751e-15	1.41743e-15
4.16834e-16	3.56472e-16	4.68378e-15	8.70892e-16	7.26678e-16	2.31235e-15	2.51433e-15	8.12899e-16	1.39372e-15			46	1.56533e-15	1.32266e-15
4.0167e-16	3.49838e-16	7.57661e-15	8.32966e-16	8.06211e-16	2.27093e-15	2.68989e-15	8.0104e-16	1.84542e-15			47	1.95273e-15	2.13838e-15
3.58324e-16	4.41882e-16	6.1847e-15	8.25084e-16	8.73638e-16	2.45248e-15	2.88059e-15	7.98514e-16	1.81426e-15			48	1.84772e-15	1.74907e-15
3.84431e-16	4.63916e-16	4.92878e-15	3.28427e-15	9.24545e-16	2.3943e-15	2.93066e-15	9.96671e-16	1.882e-15			49	2.02106e-15	1.42951e-15
5.28549e-16	4.44992e-16	1.1415e-14	9.70687e-16	9.13692e-16	2.57537e-15	3.00209e-15	9.43429e-16	1.96841e-15			50	2.52913e-15	3.25571e-15
4.83922e-16	4.26507e-16	4.74973e-15	9.22096e-16	1.15277e-15	2.61484e-15	3.29378e-15	1.07215e-15	2.04238e-15			51	1.86202e-15	1.37268e-15
4.8268e-16	5.3102e-16	5.99612e-15	8.87056e-16	1.17868e-15	2.65236e-15	3.56637e-15	1.26037e-15	1.82479e-15			52	2.04216e-15	1.69257e-15
5.42529e-16	5.02458e-16	4.60594e-15	9.01579e-16	1.2791e-15	2.77009e-15	3.74689e-15	1.23749e-15	1.89301e-15			53	1.94212e-15	1.37806e-15
6.10211e-16	4.82744e-16	9.05905e-15	9.75996e-16	1.18924e-15	3.05694e-15	3.98679e-15	1.22693e-15	1.98672e-15			54	2.50829e-15	2.5627e-15
7.27178e-16	4.64431e-16	8.27898e-15	8.16579e-16	8.86667e-16	3.31768e-15	3.91744e-15	1.27515e-15	2.01577e-15			55	2.4111e-15	2.36787e-15
7.62186e-16	4.69587e-16	4.83271e-15	7.67491e-16	8.51161e-16	3.40358e-15	4.3107e-15	1.32893e-15	2.02288e-15			56	2.08325e-15	1.57887e-15
7.45681e-16	4.7518e-16	5.01497e-15	1.52622e-15	8.46937e-16	3.13453e-15	4.4953e-15	1.26975e-15	2.19995e-15			57	2.18984e-15	1.57427e-15
7.53464e-16	5.10048e-16	9.02569e-15	5.92541e-16	8.39412e-16	2.95204e-15	4.46833e-15	1.31527e-15	2.11154e-15			58	2.50759e-15	2.61669e-15
8.19042e-16	5.30126e-16	4.91135e-15	4.90357e-16	9.46241e-16	2.99296e-15	4.43134e-15	1.44833e-15	2.0745e-15			59	2.07158e-15	1.58401e-15
8.62234e-16	5.48331e-16	9.19329e-15	2.57609e-15	7.60221e-16	2.98087e-15	4.22541e-15	1.24546e-15	2.30852e-15			60	2.74449e-15	2.55179e-15
9.56693e-16	7.07152e-16	4.92993e-15	6.21996e-16	8.59325e-16	2.60815e-15	4.07097e-15	1.30974e-15	2.34502e-15			61	2.04544e-15	1.4825e-15
9.81281e-16	5.97123e-16	5.15577e-15	7.30408e-16	8.23775e-16	2.50672e-15	3.97361e-15	1.1836e-15	2.62863e-15			62	2.06455e-15	1.53247e-15
8.9201e-16	6.07773e-16	7.96312e-15	4.18306e-16	1.09313e-15	2.55282e-15	4.12169e-15	1.23351e-15	2.38903e-15			63	2.36349e-15	2.27073e-15
7.82315e-16	6.2457e-16	6.87689e-15	5.67575e-16	1.10904e-15	2.34208e-15	4.27245e-15	1.28421e-15	2.62827e-15			64	2.27638e-15	1.9862e-15
1.04754e-15	5.61257e-16	1.2864e-14	4.77888e-16	1.25505e-15	2.27639e-15	4.62134e-15	1.43668e-15	2.5475e-15			65	3.00974e-15	3.68577e-15
1.06809e-15	6.06039e-16	5.26627e-15	1.55459e-15	1.05226e-15	2.0726e-15	4.53308e-15	1.30196e-15	2.72847e-15			66	2.2426e-15	1.54513e-15
1.18111e-15	5.81865e-16	6.17458e-15	5.30111e-16	1.03322e-15	1.93022e-15	4.27868e-15	1.10359e-15	2.60108e-15			67	2.15716e-15	1.80567e-15
1.08226e-15	5.34656e-16	6.23137e-15	4.56568e-16	9.35731e-16	1.93582e-15	4.55664e-15	1.15896e-15	2.73789e-15			68	2.1811e-15	1.88285e-15
1.20937e-15	4.8752e-16	5.43561e-15	5.41121e-16	9.36972e-16	1.78356e-15	4.48218e-15	1.19019e-15	2.88339e-15			69	2.10555e-15	1.68386e-15
1.21286e-15	6.62732e-16	5.35225e-15	5.20668e-16	9.26076e-16	1.84878e-15	4.39418e-15	1.46043e-15	2.77674e-15			70	2.1283e-15	1.6155e-15
1.29126e-15	6.80963e-16	6.0444e-15	6.02821e-16	9.27091e-16	1.67774e-15	4.41187e-15	1.39186e-15	2.70075e-15			71	2.19209e-15	1.76863e-15
1.39632e-15	5.89987e-16	6.0333e-15	6.01156e-16	1.04241e-15	1.7377e-15	4.21584e-15	1.34327e-15	2.78178e-15			72	2.19353e-15	1.73775e-15
1.30638e-15	7.27103e-16	6.12349e-15	2.58593e-15	1.03464e-15	1.75159e-15	4.31215e-15	1.35408e-15	2.73978e-15			73	2.43724e-15	1.66771e-15
1.48036e-15	6.87186e-16	5.90776e-15	7.51834e-16	1.03317e-15	1.64845e-15	4.34058e-15	1.43071e-15	2.6883e-15			74	2.21871e-15	1.6907e-15
1.52481e-15	6.65577e-16	6.11895e-15	6.1194e-15	8.73752e-16	1.55014e-15	4.18278e-15	1.35669e-15	2.90562e-15			75	2.81086e-15	2.04107e-15
1.32803e-15	8.1696e-16	6.48022e-15	8.45981e-16	9.70269e-16	1.56369e-15	4.02498e-15	1.34876e-15	3.01432e-15			76	2.26591e-15	1.8081e-15
1.33849e-15	8.64103e-16	1.04061e-14	1.17753e-15	9.69303e-16	1.44876e-15	4.07512e-15	1.37761e-15	2.88604e-15			77	2.727e-15	2.88972e-15
1.29743e-15	9.60318e-16	5.68569e-15	1.04736e-15	8.55984e-16	1.44576e-15	4.00099e-15	1.42686e-15	2.82591e-15			78	2.17181e-15	1.57872e-15
1.35862e-15	1.10604e-15	6.06993e-15	9.78399e-16	9.23416e-16	1.41592e-15	3.96991e-15	1.37279e-15	2.74092e-15			79	2.21511e-15	1.65748e-15
1.38276e-15	1.10693e-15	6.2027e-15	1.40962e-15	9.58055e-16	1.43567e-15	4.13559e-15	1.59691e-15	2.65607e-15			80	2.32048e-15	1.66076e-15
1.25524e-15	1.02774e-15	6.32579e-15	8.44017e-16	9.31976e-16	1.29546e-15	4.14357e-15	1.64581e-15	2.63573e-15			81	2.23393e-15	1.75809e-15
1.27715e-15	9.94005e-16	5.86774e-15	9.15522e-16	8.61385e-16	1.37013e-15	4.0929e-15	1.39583e-15	2.6656e-15			82	2.16003e-15	1.64388e-15
1.27632e-15	1.07152e-15	6.22525e-15	8.59755e-16	9.67215e-16	1.32825e-15	3.8437e-15	1.53645e-15	2.60907e-15			83	2.19084e-15	1.69029e-15
1.10009e-15	1.0869e-15	6.11884e-15	2.96136e-15	8.78379e-16	1.35829e-15	3.85185e-15	1.50609e-15	2.54215e-15			84	2.37822e-15	1.62898e-15
1.31998e-15	1.12597e-15	6.64788e-15	8.41958e-16	9.81609e-16	1.33761e-15	3.67381e-15	1.66221e-15	2.25838e-15			85	2.20549e-15	1.77165e-15
1.03722e-15	1.09709e-15	1.21118e-14	9.06038e-16	9.61136e-16	1.23499e-15	3.77061e-15	1.70475e-15	2.08846e-15			86	2.76801e-15	3.41196e-15
1.2619e-15	1.30585e-15	9.001e-15	8.79988e-16	9.60829e-16	1.2231e-15	3.56823e-15	1.71544e-15	2.17305e-15			87	2.45438e-15	2.44246e-15
1.46243e-15	1.44819e-15	8.87681e-15	8.45651e-16	7.15588e-16	1.22267e-15	3.61352e-15	1.77031e-15	1.92438e-15			88	2.43106e-15	2.41431e-15
1.51149e-15	1.33637e-15	7.04579e-15	1.22292e-15	9.20485e-16	1.19089e-15	3.22417e-15	1.60634e-15	2.26238e-15			89	2.25787e-15	1.81619e-15

## Sheet: control_ec_f
1.28219e-15	1.23339e-15	8.30035e-15	1.27632e-15	9.03004e-16	1.26126e-15	3.61703e-15	1.66086e-15	2.20813e-15

## Sheet: Y-27_ec
0	1.11695e-44	0	9.32713e-44	1.82826e-43	0	5.0585e-44	8.7778e-44	2.7654e-43	0	1.69102e-43	7.2656e-44	1.66371e-44	0	1.98985e-44	0			0	6.1279e-44	8.04104e-44
6.39161e-17	1.14345e-16	1.44483e-16	1.49669e-16	6.43102e-17	6.13502e-17	5.6584e-17	2.78893e-17	3.92189e-17	6.83726e-17	5.72856e-17	2.47009e-17	3.58722e-17	1.75696e-17	3.64009e-17	1.20529e-16			1	6.7656e-17	4.07971e-17
6.01338e-17	9.48879e-17	2.20026e-16	1.26327e-16	6.19095e-17	5.51962e-17	7.21252e-17	3.36478e-17	5.90297e-17	5.98385e-17	3.8939e-17	3.11089e-17	4.28665e-17	5.83811e-17	4.61924e-17	2.15469e-16			2	7.97549e-17	5.68911e-17
9.23943e-17	1.27471e-16	1.20652e-16	1.87783e-16	6.40401e-17	4.61885e-17	7.27188e-17	3.21848e-17	4.39736e-17	8.27884e-17	4.1317e-17	3.58249e-17	1.03216e-16	3.60856e-17	4.66351e-17	1.43863e-16			3	7.9821e-17	4.45998e-17
6.77734e-17	6.93794e-17	4.67595e-16	9.64768e-17	4.73466e-17	6.72981e-17	6.92889e-17	2.75013e-17	4.02655e-17	1.25574e-16	5.66326e-17	7.13479e-17	4.42249e-17	5.32964e-17	4.16511e-17	1.37681e-16			4	9.27083e-17	1.0104e-16
7.38638e-17	1.65418e-16	2.96096e-16	1.02524e-16	5.37785e-17	5.0069e-17	4.96776e-17	4.61178e-17	2.67851e-17	9.84598e-17	5.25293e-17	3.36559e-17	6.11378e-17	3.9963e-17	3.08913e-17	1.81209e-16			5	8.5136e-17	7.00251e-17
7.56083e-17	1.39714e-16	2.84289e-16	1.36253e-16	5.86204e-17	4.62756e-17	7.50847e-17	3.58231e-17	6.53838e-17	5.35925e-17	5.60422e-17	3.46316e-17	5.35669e-17	6.42616e-17	5.27555e-17	1.41311e-16			6	8.58259e-17	6.14927e-17
8.29069e-17	9.95322e-17	9.79999e-17	8.931e-17	5.75418e-17	5.44847e-17	6.83114e-17	3.38034e-17	3.60041e-17	6.39935e-17	5.19142e-17	4.97875e-17	5.24064e-17	3.71361e-17	6.00539e-17	1.50365e-16			7	6.78469e-17	2.9267e-17
5.69306e-17	1.43208e-16	1.10814e-16	1.50043e-16	4.39025e-17	6.88867e-17	9.09993e-17	4.17171e-17	4.20304e-17	1.16672e-16	3.17386e-17	4.20737e-17	4.69571e-17	3.41021e-17	7.2197e-17	1.49139e-16			8	7.75882e-17	4.17558e-17
1.76637e-16	8.50724e-17	9.78333e-17	1.62671e-16	6.38968e-17	6.99204e-17	6.14446e-17	2.93729e-17	2.80513e-17	7.74548e-17	5.15779e-17	5.04074e-17	5.94182e-17	2.86972e-17	4.39097e-17	4.02144e-17			9	7.04112e-17	4.23111e-17
1.49881e-16	1.10891e-16	1.11688e-16	1.57202e-16	6.37935e-17	6.82766e-17	1.26349e-16	8.30994e-17	4.40284e-17	1.14914e-16	3.59369e-17	1.28227e-16	3.85367e-17	3.78171e-17	4.21473e-17	9.34174e-17			10	8.78879e-17	4.05094e-17
8.84595e-17	1.44597e-16	9.59184e-17	1.66287e-16	4.40708e-17	7.15832e-17	8.41748e-17	3.85488e-17	4.49476e-17	1.91342e-16	3.62744e-17	3.73898e-17	6.04022e-17	6.28717e-17	6.51018e-17	1.30928e-16			11	8.51811e-17	4.70754e-17
1.3921e-16	1.62351e-16	1.12729e-16	2.41842e-16	4.22442e-17	7.18738e-17	9.29378e-17	4.45823e-17	6.69789e-17	8.27894e-17	4.53477e-17	8.51347e-17	5.04593e-17	5.07736e-17	6.51909e-17	1.42303e-16			12	9.35468e-17	5.2892e-17
1.01488e-16	1.37106e-16	1.04222e-16	1.55269e-16	7.46047e-17	9.99656e-17	8.2076e-17	3.78833e-17	6.78315e-17	9.0484e-17	3.90926e-17	4.16761e-17	6.83295e-17	4.53482e-17	7.10569e-17	6.78221e-17			13	8.0266e-17	3.27347e-17
7.67224e-17	2.0238e-16	6.53228e-17	1.59569e-16	4.07497e-17	8.62109e-17	1.12114e-16	7.7881e-17	4.97132e-17	7.15765e-17	3.36059e-17	8.14939e-17	6.25717e-17	7.08911e-17	1.52557e-16	1.50013e-16			14	9.33359e-17	4.67706e-17
8.48626e-17	1.75872e-16	1.0655e-16	1.25809e-16	7.03547e-17	8.43506e-17	8.9962e-17	4.28563e-17	6.01558e-17	9.02536e-17	6.4973e-17	6.13421e-17	7.70326e-17	7.3447e-17	1.16894e-16	2.96798e-16			15	1.01345e-16	5.90586e-17
6.4781e-17	1.06417e-16	1.06101e-16	1.4242e-16	6.45174e-17	1.11076e-16	1.1543e-16	7.16207e-17	7.53647e-17	1.47377e-16	7.38577e-17	7.70567e-17	1.00828e-16	8.01463e-17	9.66687e-17	9.39744e-17			16	9.54773e-17	2.46471e-17
8.58289e-17	1.43917e-16	1.09452e-16	3.19924e-16	6.85314e-17	1.03798e-16	9.25259e-17	6.83822e-17	6.54796e-17	1.96492e-16	2.71378e-17	1.08152e-16	1.20361e-16	6.59081e-17	1.09762e-16	1.04997e-16			17	1.11916e-16	6.51675e-17
1.13654e-16	1.74137e-16	1.14381e-16	2.33501e-16	6.90242e-17	1.45413e-16	9.61489e-17	7.21323e-17	9.30869e-17	2.11955e-16	4.02146e-17	1.21074e-16	1.21839e-16	6.55004e-17	1.83447e-16	3.27309e-16			18	1.36426e-16	7.21091e-17
9.66018e-17	1.67268e-16	1.20849e-16	2.30216e-16	5.64997e-17	1.9047e-16	1.31245e-16	8.1539e-17	6.76814e-17	1.34009e-16	5.50774e-17	1.13506e-16	1.36702e-16	6.73945e-17	1.62452e-16	2.95237e-16			19	1.31672e-16	6.42756e-17
1.72291e-16	1.72331e-16	1.21309e-16	1.48411e-16	5.01789e-17	1.88528e-16	1.18163e-16	1.15756e-16	1.19098e-16	1.80178e-16	3.04133e-17	1.81615e-16	2.14071e-16	9.08967e-17	1.20897e-16	1.82741e-16			20	1.3793e-16	4.98802e-17
1.57597e-16	1.02499e-16	1.02741e-16	1.17087e-16	5.44384e-17	1.53885e-16	1.343e-16	8.69492e-17	1.47348e-16	1.71037e-16	4.7816e-17	1.89667e-16	1.81024e-16	8.05092e-17	1.52253e-16	2.48059e-16			21	1.32951e-16	5.13721e-17
1.56781e-16	1.69627e-16	1.14821e-16	2.2819e-16	4.92611e-17	1.89286e-16	1.21551e-16	8.97292e-17	1.51145e-16	2.80005e-16	5.07181e-17	2.01567e-16	1.73507e-16	7.40201e-17	2.13521e-16	2.03627e-16			22	1.5421e-16	6.43659e-17
1.80758e-16	1.63036e-16	1.66673e-16	2.34847e-16	7.59582e-17	2.17652e-16	1.61929e-16	1.43262e-16	1.5257e-16	1.81961e-16	4.58151e-17	1.9795e-16	1.82835e-16	1.03822e-16	2.42823e-16	2.47055e-16			23	1.68684e-16	5.51601e-17
1.57253e-16	1.34231e-16	1.3695e-16	1.54459e-16	5.48063e-17	2.87353e-16	1.37247e-16	1.14903e-16	1.42012e-16	2.15573e-16	5.02097e-17	2.62568e-16	2.45065e-16	1.08798e-16	2.05129e-16	1.73547e-16			24	1.61257e-16	6.57211e-17
1.50785e-16	1.45709e-16	1.65267e-16	2.30584e-16	6.79538e-17	2.4993e-16	2.34624e-16	1.27477e-16	1.6858e-16	3.37509e-16	5.62432e-17	2.10515e-16	2.24142e-16	1.50837e-16	3.10151e-16	2.16413e-16			25	1.9042e-16	7.43747e-17
1.84017e-16	1.7867e-16	1.66437e-16	2.17099e-16	7.66848e-17	2.90379e-16	1.36097e-16	1.38846e-16	1.67039e-16	2.18785e-16	3.73473e-17	2.19268e-16	2.23258e-16	1.6173e-16	2.81759e-16	1.90063e-16			26	1.80467e-16	6.33831e-17
2.16206e-16	1.30903e-16	1.83315e-16	2.36434e-16	5.33044e-17	2.88228e-16	1.38673e-16	1.0366e-16	1.82497e-16	4.87945e-16	3.53179e-17	2.08193e-16	3.0738e-16	1.57761e-16	1.83697e-16	2.06031e-16			27	1.94972e-16	1.03865e-16
1.8713e-16	1.77788e-16	1.96525e-16	2.53673e-16	6.7555e-17	3.40833e-16	1.51855e-16	1.50499e-16	2.01612e-16	3.57835e-16	8.2934e-17	2.52553e-16	3.18239e-16	1.412e-16	4.22513e-16	2.60115e-16			28	2.22679e-16	9.66343e-17
2.18051e-16	2.07303e-16	1.74331e-16	2.6527e-16	7.51011e-17	3.22786e-16	1.49957e-16	1.64543e-16	2.21253e-16	2.31057e-16	4.28343e-17	2.54456e-16	2.65618e-16	1.47088e-16	2.14546e-16	2.75985e-16			29	2.01886e-16	7.15247e-17
1.99694e-16	2.35657e-16	1.78552e-16	1.85323e-16	7.75333e-17	4.17704e-16	1.3264e-16	1.64759e-16	2.74741e-16	2.36536e-16	4.66826e-17	3.6179e-16	3.02671e-16	1.29646e-16	1.63843e-16	1.73363e-16			30	2.05071e-16	9.48088e-17
2.25008e-16	1.3733e-16	1.99281e-16	1.82495e-16	6.9944e-17	3.48279e-16	1.44951e-16	1.31234e-16	2.1602e-16	2.57848e-16	5.15417e-17	2.70241e-16	3.95223e-16	1.58208e-16	1.92292e-16	1.89257e-16			31	1.98072e-16	8.73466e-17
1.85663e-16	2.35063e-16	1.83534e-16	1.92117e-16	6.41005e-17	4.14934e-16	1.35065e-16	1.46244e-16	2.51202e-16	2.3553e-16	4.25396e-17	2.83259e-16	4.16606e-16	1.74953e-16	2.02491e-16	2.81217e-16			32	2.15282e-16	9.98625e-17
2.6932e-16	1.70234e-16	1.92138e-16	2.31594e-16	9.25148e-17	3.91538e-16	1.59746e-16	1.09352e-16	2.74613e-16	2.96102e-16	5.8945e-17	3.4466e-16	3.30384e-16	1.61825e-16	2.1122e-16	1.86375e-16			33	2.17535e-16	9.16186e-17
1.95828e-16	1.86524e-16	2.19924e-16	1.91337e-16	7.91226e-17	4.069e-16	1.59527e-16	1.27079e-16	2.53242e-16	4.03463e-16	4.1131e-17	3.54674e-16	4.50532e-16	1.28448e-16	2.0955e-16	2.4412e-16			34	2.28213e-16	1.1609e-16
2.76698e-16	2.73816e-16	2.38701e-16	2.93919e-16	8.36075e-17	4.33787e-16	1.61797e-16	1.41947e-16	2.76469e-16	3.01653e-16	5.619e-17	4.45161e-16	4.15826e-16	2.89178e-16	2.88701e-16	2.47161e-16			35	2.64038e-16	1.09162e-16
2.60695e-16	2.143e-16	2.45354e-16	1.78902e-16	9.99327e-17	4.52798e-16	1.46534e-16	1.19239e-16	2.57074e-16	4.94325e-16	4.80151e-17	4.38715e-16	4.51365e-16	1.62294e-16	2.0766e-16	2.55272e-16			36	2.5203e-16	1.33245e-16
2.55785e-16	3.16852e-16	1.6473e-16	2.20141e-16	9.87735e-17	4.19414e-16	1.67022e-16	1.55585e-16	2.74095e-16	3.3412e-16	7.10942e-17	4.81581e-16	4.75906e-16	1.78607e-16	3.88747e-16	2.53556e-16			37	2.66001e-16	1.23649e-16
2.64744e-16	1.88842e-16	2.13103e-16	3.05461e-16	9.40174e-17	4.83575e-16	1.8658e-16	1.3992e-16	2.77037e-16	2.53667e-16	9.93743e-17	4.56569e-16	5.21082e-16	1.83695e-16	2.375e-16	3.22429e-16			38	2.64225e-16	1.24893e-16
2.32351e-16	2.53379e-16	2.36218e-16	3.3907e-16	9.15983e-17	4.69128e-16	1.70004e-16	1.28887e-16	3.25776e-16	3.41375e-16	5.79249e-17	3.36885e-16	5.652e-16	1.80473e-16	2.60092e-16	3.05962e-16			39	2.68395e-16	1.28248e-16
2.53861e-16	2.67332e-16	1.97373e-16	3.6293e-16	1.38722e-16	5.53481e-16	1.98881e-16	1.88576e-16	2.74297e-16	3.04626e-16	7.30013e-17	4.1491e-16	5.14739e-16	1.84638e-16	2.41905e-16	2.70044e-16			40	2.77457e-16	1.25392e-16
1.85345e-16	1.89353e-16	2.30069e-16	4.32792e-16	1.15553e-16	4.88097e-16	2.41258e-16	1.87942e-16	2.57372e-16	3.65861e-16	1.03431e-16	4.14455e-16	4.29548e-16	3.57512e-16	2.06814e-16	2.49153e-16			41	2.7841e-16	1.15952e-16
2.93718e-16	3.342e-16	2.60019e-16	2.33429e-16	1.00233e-16	4.8363e-16	1.99281e-16	1.42843e-16	2.74399e-16	4.59007e-16	5.92083e-17	4.81361e-16	4.83542e-16	2.25389e-16	2.30686e-16	2.8756e-16			42	2.84282e-16	1.30571e-16
2.48068e-16	2.60118e-16	2.53591e-16	2.40634e-16	1.31153e-16	5.18562e-16	1.52723e-16	1.11723e-16	2.79205e-16	3.1312e-16	5.34506e-17	5.84725e-16	4.55203e-16	2.38424e-16	2.61269e-16	2.92383e-16			43	2.74647e-16	1.38066e-16
3.58059e-16	3.73876e-16	2.37989e-16	2.77364e-16	1.16011e-16	4.72905e-16	1.76236e-16	1.54331e-16	2.78286e-16	4.72892e-16	5.26024e-17	4.58645e-16	4.28976e-16	1.56856e-16	3.63742e-16	2.52603e-16			44	2.89461e-16	1.30352e-16
2.54558e-16	2.92489e-16	2.72882e-16	2.27449e-16	1.144e-16	5.10928e-16	1.57947e-16	1.12663e-16	3.03445e-16	3.00187e-16	7.29997e-17	5.36028e-16	4.82725e-16	1.98401e-16	2.57196e-16	2.21972e-16			45	2.69767e-16	1.33835e-16
2.46472e-16	3.27592e-16	3.42795e-16	3.0344e-16	8.84057e-17	5.15658e-16	1.81566e-16	1.53536e-16	2.65649e-16	3.66838e-16	5.97137e-17	4.71196e-16	4.95139e-16	1.91194e-16	2.30213e-16	2.94238e-16			46	2.83353e-16	1.31175e-16
2.37512e-16	3.57777e-16	2.8123e-16	2.4609e-16	1.16367e-16	4.92704e-16	1.83857e-16	1.49872e-16	2.86518e-16	2.93293e-16	1.02667e-16	5.20025e-16	6.27451e-16	1.99919e-16	2.75899e-16	2.76825e-16			47	2.905e-16	1.41836e-16
2.4171e-16	4.16386e-16	2.81225e-16	3.90757e-16	1.56787e-16	5.1596e-16	1.98854e-16	1.31252e-16	3.12384e-16	3.60734e-16	8.3497e-17	5.64464e-16	5.58052e-16	2.10058e-16	2.52897e-16	3.56653e-16			48	3.14479e-16	1.43352e-16
2.34834e-16	4.16175e-16	3.03376e-16	4.09127e-16	1.43318e-16	4.39947e-16	1.9188e-16	1.26104e-16	2.75034e-16	4.27468e-16	6.65374e-17	5.38034e-16	4.92471e-16	2.25233e-16	5.46029e-16	2.81672e-16			49	3.19827e-16	1.45983e-16
2.32892e-16	4.47596e-16	3.61375e-16	3.19777e-16	1.42071e-16	5.15955e-16	2.01705e-16	1.58696e-16	2.45749e-16	3.4819e-16	7.36384e-17	5.61231e-16	4.62425e-16	2.6175e-16	3.01629e-16	7.682e-16			50	3.3768e-16	1.73339e-16
3.01466e-16	3.86592e-16	3.04205e-16	2.9217e-16	1.27151e-16	4.53796e-16	2.14365e-16	1.25239e-16	3.15791e-16	3.61435e-16	7.20194e-17	5.10505e-16	4.04421e-16	2.81341e-16	2.83649e-16	3.82015e-16			51	3.0101e-16	1.16599e-16
3.03053e-16	5.12788e-16	2.96918e-16	2.49201e-16	1.23973e-16	4.93844e-16	1.96787e-16	1.11138e-16	3.03518e-16	4.04365e-16	6.88246e-17	5.20224e-16	4.98754e-16	2.39217e-16	2.64811e-16	5.86247e-16			52	3.23354e-16	1.56775e-16
2.69433e-16	4.63057e-16	3.3649e-16	3.19394e-16	1.43394e-16	4.67759e-16	1.997e-16	1.14181e-16	3.05796e-16	2.90813e-16	8.74472e-17	4.93362e-16	4.92886e-16	2.05586e-16	2.66981e-16	6.19848e-16			53	3.17258e-16	1.48728e-16
2.80842e-16	5.10817e-16	3.29437e-16	2.96019e-16	1.40812e-16	4.71645e-16	1.92702e-16	1.50039e-16	2.91954e-16	4.06633e-16	8.10826e-17	5.36547e-16	4.36523e-16	1.83336e-16	2.78328e-16	2.96618e-16			54	3.05208e-16	1.32785e-16
2.99795e-16	5.59375e-16	3.33656e-16	3.18648e-16	1.508e-16	5.21964e-16	1.88586e-16	9.55061e-17	2.71048e-16	4.78914e-16	7.21758e-17	7.42769e-16	4.55621e-16	2.06647e-16	2.95092e-16	3.51265e-16			55	3.33866e-16	1.75454e-16
3.21011e-16	5.84621e-16	3.67563e-16	2.84575e-16	1.28644e-16	4.5476e-16	2.04966e-16	1.08445e-16	2.80705e-16	3.7288e-16	7.18288e-17	5.89688e-16	4.74742e-16	1.88061e-16	2.36536e-16	4.256e-16			56	3.18414e-16	1.55e-16
2.88113e-16	4.6869e-16	3.65515e-16	3.06322e-16	1.35389e-16	4.64022e-16	1.86533e-16	1.18858e-16	3.37591e-16	3.6087e-16	7.36355e-17	5.23378e-16	4.56938e-16	1.9855e-16	2.45391e-16	3.47885e-16			57	3.04855e-16	1.31979e-16
2.59545e-16	5.35303e-16	3.92533e-16	5.02973e-16	1.31952e-16	5.94717e-16	1.73061e-16	9.99839e-17	3.2099e-16	3.42197e-16	9.08587e-17	5.63974e-16	4.72725e-16	2.12242e-16	2.90811e-16	3.98196e-16			58	3.36379e-16	1.61963e-16
3.41435e-16	5.21103e-16	3.69998e-16	5.40762e-16	1.35004e-16	4.63726e-16	1.81645e-16	1.17492e-16	2.81873e-16	3.22097e-16	2.44623e-16	5.07541e-16	4.99806e-16	2.18922e-16	2.55902e-16	7.73431e-16			59	3.6096e-16	1.72281e-16
2.68978e-16	4.5825e-16	4.45375e-16	3.18071e-16	1.48386e-16	5.65114e-16	1.9489e-16	9.17517e-17	2.5726e-16	5.21254e-16	7.57031e-17	5.53039e-16	4.66925e-16	2.21572e-16	3.04514e-16	2.88516e-16			60	3.23725e-16	1.55208e-16
3.09007e-16	5.97162e-16	4.00175e-16	3.56397e-16	1.74342e-16	5.74744e-16	1.8458e-16	1.01454e-16	2.50997e-16	3.70133e-16	6.77214e-17	6.16001e-16	4.99386e-16	2.11108e-16	2.7824e-16	2.54908e-16			61	3.27897e-16	1.6667e-16
2.60203e-16	6.36786e-16	4.36642e-16	3.5478e-16	1.22807e-16	6.00446e-16	1.85681e-16	7.96306e-17	2.30291e-16	4.31462e-16	7.48027e-17	5.06466e-16	4.20432e-16	2.355e-16	2.79134e-16	3.00529e-16			62	3.22225e-16	1.67081e-16
3.88801e-16	5.67369e-16	4.94861e-16	5.00788e-16	1.21734e-16	4.89503e-16	1.92644e-16	1.04301e-16	2.62882e-16	3.97919e-16	8.68331e-17	5.51142e-16	5.24818e-16	2.21491e-16	2.97766e-16	2.93296e-16			63	3.43509e-16	1.62234e-16
3.21402e-16	5.54243e-16	4.25984e-16	3.99299e-16	1.64694e-16	4.78635e-16	1.41641e-16	8.09684e-17	2.67495e-16	4.63135e-16	9.57732e-17	7.18585e-16	4.78511e-16	2.05459e-16	2.82938e-16	3.0908e-16			64	3.3674e-16	1.72893e-16
2.81117e-16	5.87824e-16	4.45019e-16	4.45681e-16	1.64791e-16	5.96521e-16	1.9334e-16	1.04316e-16	2.76296e-16	3.35593e-16	7.9737e-17	5.53837e-16	5.53609e-16	2.12875e-16	3.20533e-16	3.40665e-16			65	3.43235e-16	1.65865e-16
2.75403e-16	5.5039e-16	4.66099e-16	3.9635e-16	2.06189e-16	4.84614e-16	3.2781e-16	1.44687e-16	2.70202e-16	3.80839e-16	7.88821e-17	6.26737e-16	4.8956e-16	2.42107e-16	3.13445e-16	3.0807e-16			66	3.47587e-16	1.44552e-16
3.38704e-16	5.5211e-16	4.15674e-16	3.97555e-16	1.87939e-16	5.26783e-16	1.83617e-16	9.97164e-17	2.34344e-16	5.43877e-16	9.0891e-17	5.47569e-16	4.85722e-16	2.17376e-16	2.80855e-16	6.65627e-16			67	3.60522e-16	1.75208e-16
2.81512e-16	5.69374e-16	4.70792e-16	3.75158e-16	1.37664e-16	5.44129e-16	2.79103e-16	1.23915e-16	2.94438e-16	4.9137e-16	8.49555e-17	6.30145e-16	4.65223e-16	2.45333e-16	2.67234e-16	4.68562e-16			68	3.58057e-16	1.62568e-16
2.98882e-16	5.42511e-16	5.13453e-16	4.56803e-16	1.46329e-16	4.98812e-16	2.8037e-16	1.18961e-16	2.19908e-16	5.24055e-16	1.08607e-16	5.52278e-16	5.52282e-16	2.60367e-16	2.88281e-16	4.02976e-16			69	3.60305e-16	1.58099e-16
3.39132e-16	7.89017e-16	4.6921e-16	4.20059e-16	1.54263e-16	5.00053e-16	2.07114e-16	8.45467e-17	2.19311e-16	5.59146e-16	8.59467e-17	6.21401e-16	4.77429e-16	2.31273e-16	2.57033e-16	4.97899e-16			70	3.69552e-16	1.97266e-16
3.47168e-16	7.69391e-16	4.42112e-16	4.06093e-16	1.22713e-16	5.13765e-16	2.31992e-16	1.11659e-16	2.45403e-16	5.39678e-16	6.58409e-17	7.24231e-16	5.51991e-16	2.4867e-16	3.58521e-16	6.17264e-16			71	3.93531e-16	2.08672e-16
2.55709e-16	7.97182e-16	4.86975e-16	4.17783e-16	1.31967e-16	5.84286e-16	2.03921e-16	1.20503e-16	2.35294e-16	4.91077e-16	6.88266e-17	5.9364e-16	4.75988e-16	2.32566e-16	2.72951e-16	5.28055e-16			72	3.68545e-16	2.00302e-16
3.82276e-16	8.06749e-16	4.48952e-16	3.92148e-16	1.67562e-16	5.78851e-16	2.35208e-16	1.61198e-16	1.85683e-16	4.67152e-16	1.13178e-16	6.96087e-16	5.19714e-16	2.9191e-16	2.71054e-16	3.07297e-16			73	3.76564e-16	1.93849e-16
2.91153e-16	6.89367e-16	4.42577e-16	3.9e-16	1.74916e-16	5.76059e-16	1.97529e-16	1.06782e-16	2.09815e-16	3.74855e-16	9.8419e-17	6.24528e-16	4.89133e-16	2.72156e-16	2.82002e-16	3.18353e-16			74	3.46103e-16	1.7369e-16
3.59337e-16	6.64789e-16	5.86205e-16	4.50255e-16	1.35506e-16	4.85481e-16	2.31768e-16	1.2093e-16	2.33581e-16	3.60526e-16	9.89593e-17	5.43851e-16	4.64817e-16	2.15079e-16	2.75656e-16	3.25377e-16			75	3.47007e-16	1.67235e-16
3.48374e-16	7.79808e-16	5.71598e-16	3.93836e-16	1.47356e-16	4.97406e-16	2.65645e-16	1.2051e-16	1.9603e-16	4.38374e-16	8.19569e-17	6.22927e-16	5.2917e-16	2.62763e-16	2.68631e-16	3.93467e-16			76	3.69866e-16	1.90082e-16
2.90113e-16	8.4826e-16	5.6874e-16	4.32408e-16	1.63989e-16	5.78577e-16	2.17349e-16	1.06317e-16	2.32267e-16	4.54429e-16	9.3088e-17	6.10765e-16	5.47009e-16	2.41017e-16	3.1481e-16	3.94465e-16			77	3.8085e-16	2.04291e-16
3.85433e-16	6.4078e-16	5.17747e-16	4.44091e-16	1.61426e-16	5.37091e-16	2.2035e-16	1.63929e-16	2.06243e-16	4.31031e-16	8.76853e-17	6.7647e-16	5.09699e-16	3.60085e-16	3.33349e-16	3.91749e-16			78	3.79197e-16	1.69817e-16
3.6774e-16	7.27532e-16	5.31502e-16	3.26105e-16	1.67774e-16	5.31433e-16	2.65426e-16	1.51623e-16	1.83412e-16	4.98705e-16	9.01428e-17	7.63238e-16	5.32055e-16	3.2624e-16	3.70069e-16	2.80124e-16			79	3.8207e-16	1.93598e-16
3.1946e-16	7.59058e-16	5.65188e-16	5.10689e-16	1.49521e-16	4.52288e-16	2.73002e-16	8.58158e-17	2.26211e-16	4.87785e-16	1.07458e-16	6.33185e-16	4.74775e-16	2.95504e-16	3.28008e-16	3.22069e-16			80	3.74376e-16	1.8547e-16
3.79486e-16	6.94903e-16	5.07829e-16	4.03904e-16	1.78821e-16	5.02443e-16	3.17157e-16	1.4371e-16	1.965e-16	3.5158e-16	1.14829e-16	6.02989e-16	4.93927e-16	3.03541e-16	3.08001e-16	2.96232e-16			81	3.62241e-16	1.60434e-16
3.73173e-16	7.83857e-16	5.13926e-16	5.26087e-16	1.40318e-16	4.71481e-16	2.37181e-16	1.49466e-16	2.2163e-16	3.85043e-16	1.23082e-16	8.04227e-16	5.58188e-16	2.87252e-16	4.01938e-16	3.2803e-16			82	3.94055e-16	2.02058e-16
3.17597e-16	6.73179e-16	5.32683e-16	4.75608e-16	1.67331e-16	5.53851e-16	3.03587e-16	1.20081e-16	2.08139e-16	3.53048e-16	9.24154e-17	7.38067e-16	4.49655e-16	2.8591e-16	3.40211e-16	4.28145e-16			83	3.77469e-16	1.81974e-16
2.95511e-16	5.93747e-16	6.29228e-16	3.83941e-16	1.71477e-16	4.26059e-16	2.29455e-16	9.99688e-17	2.03461e-16	5.22842e-16	1.03633e-16	7.4213e-16	4.82728e-16	3.37664e-16	2.82907e-16	3.39182e-16			84	3.65246e-16	1.83828e-16
3.40505e-16	7.16397e-16	5.5718e-16	5.32107e-16	1.94505e-16	4.47284e-16	2.56052e-16	1.24085e-16	1.92052e-16	5.11713e-16	8.00204e-17	6.85804e-16	5.76987e-16	3.05472e-16	4.18608e-16	3.67952e-16			85	3.9417e-16	1.88415e-16
3.03473e-16	6.37237e-16	6.1126e-16	3.94948e-16	1.68778e-16	4.57209e-16	2.29963e-16	1.16429e-16	2.01503e-16	5.62801e-16	8.43514e-17	6.55885e-16	4.91657e-16	2.76203e-16	4.89861e-16	3.63814e-16			86	3.77836e-16	1.82446e-16
3.49685e-16	7.34901e-16	6.73154e-16	5.09147e-16	1.62225e-16	5.14281e-16	3.00033e-16	1.72983e-16	2.08836e-16	6.34306e-16	1.1752e-16	7.1788e-16	4.56698e-16	2.5609e-16	4.13241e-16	3.15027e-16			87	4.085e-16	1.99185e-16
3.51569e-16	6.63318e-16	6.06353e-16	5.31513e-16	1.52646e-16	5.17361e-16	2.3486e-16	1.27541e-16	2.38693e-16	4.59646e-16	8.75356e-17	6.87455e-16	4.27056e-16	2.8378e-16	5.00406e-16	3.34947e-16			88	3.87792e-16	1.84396e-16
3.14593e-16	7.56382e-16	5.68504e-16	5.05474e-16	1.86952e-16	4.51925e-16	2.95564e-16	1.50635e-16	1.88457e-16	4.92961e-16	9.99779e-17	7.83454e-16	4.41382e-16	2.86029e-16	3.38293e-16	2.8483e-16			89	3.84088e-16	1.95762e-16

## Sheet: Y-27_ec_f
3.25889e-16	6.83664e-16	6.07613e-16	4.76188e-16	1.72764e-16	4.6902e-16	2.57655e-16	1.3194e-16	2.055e-16	5.30712e-16	9.55063e-17	7.12101e-16	4.79418e-16	2.90873e-16	4.07219e-16	3.34292e-16

## Sheet: CK-666_ec
7.93914e-44	1.44032e-43	0	2.16144e-44	1.12951e-44	1.42884e-44	2.29346e-46	6.00486e-44	8.25174e-44	4.69732e-46	0	6.90832e-44	8.10735e-45		0	3.77752e-44	4.34566e-44
8.39495e-17	3.99915e-17	4.19269e-17	5.06541e-17	4.76806e-17	4.96741e-17	8.41826e-17	3.53216e-17	2.92638e-17	6.76845e-17	4.49914e-17	5.33776e-17	6.34089e-17		1	5.3239e-17	1.64793e-17
6.35343e-17	4.97647e-17	3.19045e-17	4.55785e-17	4.74685e-17	5.63219e-17	9.42572e-17	4.13529e-17	3.36371e-17	6.5578e-17	1.04167e-16	4.41559e-17	5.87801e-17		2	5.66539e-17	2.0737e-17
5.93677e-17	4.20362e-17	2.64037e-17	6.18527e-17	8.58128e-17	7.8157e-17	4.75947e-17	4.62047e-17	3.93626e-17	6.79166e-17	1.0517e-16	5.08186e-17	1.74721e-16		3	6.81091e-17	3.69143e-17
1.15461e-16	4.22623e-17	6.12196e-17	1.39241e-16	8.05152e-17	1.40098e-16	6.17272e-17	4.47146e-17	3.82602e-17	8.4613e-17	8.68803e-17	4.08337e-17	1.05078e-16		4	8.00696e-17	3.47613e-17
1.21301e-16	4.85536e-17	3.35657e-17	1.71598e-16	6.5051e-17	1.25739e-16	6.27011e-17	5.67332e-17	3.47325e-17	7.57531e-17	1.2055e-16	4.9607e-17	7.6173e-17		5	8.01583e-17	4.02364e-17
8.3266e-17	6.68756e-17	3.96366e-17	8.67122e-17	8.82182e-17	1.02055e-16	5.49314e-17	3.74595e-17	2.29723e-17	8.10883e-17	1.19124e-16	5.9352e-17	1.36552e-16		6	7.52495e-17	3.15794e-17
7.88872e-17	3.34848e-17	5.07515e-17	1.38658e-16	6.60264e-17	6.88595e-17	5.95885e-17	5.35637e-17	4.65307e-17	7.16339e-17	1.21743e-16	3.40094e-17	1.43494e-16		7	7.44024e-17	3.56996e-17
1.00944e-16	4.15224e-17	5.58229e-17	1.30738e-16	5.67959e-17	1.44392e-16	6.43034e-17	8.50855e-17	6.63758e-17	9.68538e-17	1.31655e-16	4.44285e-17	1.71449e-16		8	9.15667e-17	4.02512e-17
9.9485e-17	4.03285e-17	7.51477e-17	7.35961e-17	6.06428e-17	6.65773e-17	5.73069e-17	7.1851e-17	4.26196e-17	7.20551e-17	1.19228e-16	4.09511e-17	1.50647e-16		9	7.46489e-17	3.07561e-17
9.47338e-17	4.5986e-17	1.58107e-16	1.62577e-16	8.0532e-17	4.64435e-17	6.96849e-17	7.28288e-17	3.364e-17	9.8224e-17	1.36892e-16	3.93534e-17	2.00445e-16		10	9.5342e-17	5.1437e-17
1.03454e-16	3.47042e-17	2.5213e-16	1.82565e-16	8.6041e-17	1.10138e-16	4.60185e-17	5.895e-17	2.80538e-17	9.01961e-17	1.09794e-16	6.42519e-17	2.08442e-16		11	1.05749e-16	6.62796e-17
1.09149e-16	5.02546e-17	3.24807e-16	1.95576e-16	7.47118e-17	9.08823e-17	5.96718e-17	7.57075e-17	3.29241e-17	1.0474e-16	1.23926e-16	6.50467e-17	1.18816e-16		12	1.09709e-16	7.37015e-17
1.10722e-16	4.78364e-17	3.59345e-16	8.73633e-17	7.07741e-17	6.22134e-17	6.71311e-17	1.16686e-16	3.84333e-17	9.62326e-17	1.72988e-16	5.08413e-17	1.67695e-16		13	1.11405e-16	8.24324e-17
1.05456e-16	4.26785e-17	3.88851e-16	1.59004e-16	9.173e-17	6.88026e-17	5.27013e-17	1.21742e-16	6.05411e-17	1.00184e-16	1.42865e-16	3.79719e-17	1.18298e-16		14	1.14679e-16	8.716e-17
1.53695e-16	5.76198e-17	4.92509e-16	1.79865e-16	9.39792e-17	1.05743e-16	5.19969e-17	1.50339e-16	3.69205e-17	1.25235e-16	1.4108e-16	3.18155e-17	1.71604e-16		15	1.37877e-16	1.13496e-16
7.93149e-17	6.95099e-17	5.23716e-16	3.01019e-16	9.87326e-17	4.29043e-17	5.87826e-17	2.11323e-16	5.49775e-17	1.11275e-16	1.90485e-16	3.63842e-17	1.37665e-16		16	1.47391e-16	1.31636e-16
1.18044e-16	6.50941e-17	4.62857e-16	2.27304e-16	1.2047e-16	9.08226e-17	6.27893e-17	2.62437e-16	5.31783e-17	1.27098e-16	1.71801e-16	6.41166e-17	1.74531e-16		17	1.53888e-16	1.09145e-16
9.35051e-17	5.88714e-17	6.40272e-16	2.84564e-16	1.23619e-16	6.02245e-17	5.61732e-17	3.39094e-16	5.95261e-17	1.58713e-16	1.36169e-16	5.34905e-17	1.18612e-16		18	1.6791e-16	1.61214e-16
9.34163e-17	5.23443e-17	7.08071e-16	2.69193e-16	1.47803e-16	6.31087e-17	9.10562e-17	4.61215e-16	1.04148e-16	1.25238e-16	1.85753e-16	3.70381e-17	1.6746e-16		19	1.92757e-16	1.83882e-16
1.00354e-16	7.32732e-17	8.13884e-16	4.13103e-16	1.34994e-16	8.62371e-17	7.48582e-17	4.22755e-16	7.71888e-17	1.61097e-16	2.35178e-16	7.61634e-17	1.49946e-16		20	2.16849e-16	2.08047e-16
7.92179e-17	7.88223e-17	8.47925e-16	4.40995e-16	1.37915e-16	7.12326e-17	1.00562e-16	5.61682e-16	9.70163e-17	1.06685e-16	1.29398e-16	5.45935e-17	1.41474e-16		21	2.1904e-16	2.34102e-16
1.00656e-16	7.64588e-17	9.52826e-16	3.20078e-16	1.86287e-16	9.68069e-17	8.48743e-17	5.74091e-16	8.49215e-17	1.14944e-16	2.32291e-16	6.38607e-17	1.57019e-16		22	2.3424e-16	2.47603e-16
7.14158e-17	8.36109e-17	9.13583e-16	3.2909e-16	1.57409e-16	6.06599e-17	6.26835e-17	6.46129e-16	1.0589e-16	1.0997e-16	1.5686e-16	5.92198e-17	2.71254e-16		23	2.32906e-16	2.51871e-16
1.31927e-16	7.26948e-17	9.59161e-16	4.67162e-16	1.5823e-16	8.47398e-17	8.69699e-17	7.36674e-16	1.17472e-16	1.30969e-16	2.39725e-16	1.16716e-16	1.63543e-16		24	2.66614e-16	2.70057e-16
1.14723e-16	1.03028e-16	1.0812e-15	5.26336e-16	1.66696e-16	9.57666e-17	8.66403e-17	8.27595e-16	1.11725e-16	1.49101e-16	2.41974e-16	7.24306e-17	1.72478e-16		25	2.88438e-16	3.09576e-16
1.0171e-16	1.58076e-16	1.01391e-15	6.4582e-16	1.68032e-16	8.82112e-17	9.11988e-17	1.01373e-15	1.45686e-16	1.2877e-16	2.17835e-16	7.05678e-17	2.18159e-16		26	3.12439e-16	3.30641e-16
1.24839e-16	1.1713e-16	1.09654e-15	6.70235e-16	2.00362e-16	7.70114e-17	8.68365e-17	1.03022e-15	1.28963e-16	1.49502e-16	3.25609e-16	7.99115e-17	2.25537e-16		27	3.31746e-16	3.47233e-16
1.10604e-16	1.60526e-16	8.25026e-16	7.51129e-16	1.71159e-16	1.28546e-16	9.39e-17	9.90309e-16	1.211e-16	1.4331e-16	2.92079e-16	9.59933e-17	2.08142e-16		28	3.14756e-16	3.04244e-16
1.48245e-16	1.81384e-16	8.73122e-16	8.87093e-16	1.8207e-16	8.83761e-17	1.08922e-16	1.16912e-15	1.49299e-16	1.6249e-16	1.88624e-16	7.78408e-17	2.4189e-16		29	3.4296e-16	3.55569e-16
1.4668e-16	1.28014e-16	8.8522e-16	9.26658e-16	1.67736e-16	9.9559e-17	8.2621e-17	1.40319e-15	1.65237e-16	2.28536e-16	2.43633e-16	7.91576e-17	2.2233e-16		30	3.67583e-16	4.04979e-16
1.81004e-16	1.87943e-16	9.44156e-16	1.03337e-15	1.59034e-16	1.42783e-16	1.24594e-16	1.28853e-15	1.89901e-16	2.26101e-16	2.48617e-16	8.75873e-17	2.14637e-16		31	3.86788e-16	3.92892e-16
1.26152e-16	1.90797e-16	8.09266e-16	7.68967e-16	1.69281e-16	1.27562e-16	8.74184e-17	1.31232e-15	1.50307e-16	2.65276e-16	2.00363e-16	8.49331e-17	2.41842e-16		32	3.48806e-16	3.60602e-16
1.24967e-16	1.87417e-16	7.64628e-16	8.36774e-16	1.52392e-16	1.40788e-16	1.03642e-16	1.60071e-15	1.79669e-16	2.62925e-16	2.61957e-16	8.28973e-17	2.24495e-16		33	3.78712e-16	4.21941e-16
1.45055e-16	1.6244e-16	6.77275e-16	9.80244e-16	1.75395e-16	1.34812e-16	1.37265e-16	1.6729e-15	2.33668e-16	2.7829e-16	2.99593e-16	1.2859e-16	2.51421e-16		34	4.05919e-16	4.37908e-16
1.49077e-16	1.85672e-16	6.03423e-16	8.76382e-16	2.21401e-16	1.37807e-16	1.02589e-16	1.86032e-15	2.21313e-16	2.68807e-16	3.29223e-16	1.23694e-16	2.72335e-16		35	4.11696e-16	4.67717e-16
1.37075e-16	1.7248e-16	7.70327e-16	9.26467e-16	1.7947e-16	1.70915e-16	1.18323e-16	1.55024e-15	1.66982e-16	2.91817e-16	3.98794e-16	1.43862e-16	2.74419e-16		36	4.07783e-16	4.10001e-16
1.44144e-16	1.82275e-16	6.31178e-16	8.50028e-16	1.72939e-16	1.19512e-16	1.16142e-16	1.83509e-15	2.11181e-16	2.9741e-16	3.25901e-16	1.09347e-16	4.0024e-16		37	4.1503e-16	4.61798e-16
1.14174e-16	1.66749e-16	6.39217e-16	8.09199e-16	1.95668e-16	1.81537e-16	1.01472e-16	1.75573e-15	2.13417e-16	3.89906e-16	4.40566e-16	1.14735e-16	2.5204e-16		38	4.13416e-16	4.3983e-16
1.44918e-16	1.68342e-16	6.60374e-16	1.21777e-15	2.29962e-16	1.22798e-16	1.05642e-16	1.75631e-15	2.16184e-16	3.71942e-16	3.31748e-16	1.4989e-16	2.67444e-16		39	4.41795e-16	4.79095e-16
1.93705e-16	1.32117e-16	6.77325e-16	9.81492e-16	2.24761e-16	1.34103e-16	1.35395e-16	1.79384e-15	2.24998e-16	3.03437e-16	3.76731e-16	1.66549e-16	3.819e-16		40	4.40489e-16	4.57214e-16
1.67641e-16	1.78036e-16	6.42524e-16	1.15895e-15	2.33433e-16	1.42207e-16	1.43298e-16	1.72859e-15	2.01519e-16	3.46997e-16	3.46919e-16	1.48456e-16	3.74446e-16		41	4.47155e-16	4.59379e-16
1.65724e-16	1.4759e-16	5.77222e-16	1.05535e-15	2.14361e-16	1.98513e-16	1.2983e-16	1.57879e-15	1.82316e-16	2.96165e-16	3.51353e-16	1.68323e-16	4.14324e-16		42	4.21527e-16	4.13751e-16
1.41751e-16	1.47607e-16	6.00312e-16	9.99018e-16	3.11679e-16	1.66953e-16	1.17386e-16	1.9788e-15	2.3557e-16	3.61869e-16	2.8644e-16	1.5943e-16	4.66374e-16		43	4.59476e-16	4.97811e-16
1.83834e-16	1.83363e-16	6.60889e-16	8.9485e-16	2.60983e-16	1.62264e-16	1.48592e-16	1.99202e-15	2.3856e-16	3.78642e-16	3.27515e-16	1.79137e-16	3.51075e-16		44	4.58594e-16	4.8978e-16
1.6426e-16	1.65264e-16	6.66136e-16	9.53003e-16	2.04443e-16	1.79717e-16	1.19397e-16	1.68287e-15	2.41003e-16	3.72719e-16	4.04427e-16	2.4066e-16	4.81361e-16		45	4.51943e-16	4.22588e-16
1.73694e-16	1.65871e-16	6.48405e-16	1.40617e-15	1.65309e-16	1.82423e-16	1.4418e-16	1.42017e-15	1.76032e-16	4.08973e-16	3.79292e-16	2.16058e-16	4.79339e-16		46	4.58916e-16	4.32736e-16
1.59056e-16	1.38612e-16	7.2173e-16	7.86838e-16	2.21531e-16	2.46523e-16	1.73594e-16	1.47202e-15	2.32347e-16	4.26808e-16	4.79003e-16	2.29765e-16	3.88019e-16		47	4.36603e-16	3.59721e-16
1.92078e-16	1.72311e-16	6.37637e-16	8.3183e-16	2.34468e-16	2.3718e-16	1.61767e-16	1.50923e-15	2.49582e-16	4.33425e-16	3.7329e-16	2.5143e-16	6.08497e-16		48	4.53286e-16	3.65025e-16
1.70456e-16	1.5998e-16	7.05446e-16	1.9072e-15	2.14547e-16	1.95608e-16	1.668e-16	1.61511e-15	2.54598e-16	4.56369e-16	4.02794e-16	2.42865e-16	3.52081e-16		49	5.26451e-16	5.49529e-16
1.78122e-16	1.44286e-16	6.1159e-16	1.40272e-15	2.84854e-16	2.63641e-16	1.54998e-16	1.36158e-15	2.20135e-16	4.80307e-16	4.08761e-16	3.25225e-16	3.76014e-16		50	4.77864e-16	4.06445e-16
2.03599e-16	1.99634e-16	5.50206e-16	8.70768e-16	1.81018e-16	2.50371e-16	1.79242e-16	1.49166e-15	2.32526e-16	5.05498e-16	4.05673e-16	3.35556e-16	3.67609e-16		51	4.44105e-16	3.56568e-16
1.79763e-16	1.49874e-16	5.23865e-16	8.03288e-16	2.19468e-16	2.33834e-16	1.53324e-16	1.44667e-15	2.29549e-16	5.05806e-16	3.93053e-16	3.21551e-16	3.73173e-16		52	4.25632e-16	3.44657e-16
2.1406e-16	1.38729e-16	5.70688e-16	1.39681e-15	1.81973e-16	2.23364e-16	2.03706e-16	1.29609e-15	2.0558e-16	5.88965e-16	3.90118e-16	3.22239e-16	3.90383e-16		53	4.70977e-16	3.98082e-16
1.86028e-16	1.64186e-16	6.38452e-16	9.53165e-16	2.17211e-16	3.00008e-16	2.04434e-16	1.30973e-15	2.09688e-16	5.75723e-16	4.07806e-16	3.28768e-16	3.88982e-16		54	4.52629e-16	3.29317e-16
1.67429e-16	2.12155e-16	7.48005e-16	9.45462e-16	2.30171e-16	2.61238e-16	2.04383e-16	1.39244e-15	2.62163e-16	6.04716e-16	4.58536e-16	3.52688e-16	2.87831e-16		55	4.71324e-16	3.49982e-16
1.7502e-16	1.93768e-16	7.09224e-16	8.71398e-16	2.38922e-16	2.5668e-16	2.42519e-16	1.14404e-15	2.13497e-16	6.51667e-16	3.90059e-16	3.58147e-16	3.71819e-16		56	4.47443e-16	2.9186e-16
1.9151e-16	1.73074e-16	7.45922e-16	9.5113e-16	1.63252e-16	2.33443e-16	2.04801e-16	1.2668e-15	2.26221e-16	6.91808e-16	3.42238e-16	3.59375e-16	3.22342e-16		57	4.51686e-16	3.37781e-16
2.1555e-16	1.551e-16	6.77649e-16	1.04479e-15	2.02787e-16	2.86856e-16	2.30351e-16	1.13612e-15	2.41679e-16	7.63079e-16	4.21901e-16	4.15988e-16	4.47633e-16		58	4.7996e-16	3.14515e-16
2.13079e-16	2.38132e-16	7.11594e-16	1.54803e-15	1.99968e-16	2.79945e-16	2.11601e-16	1.10275e-15	2.47101e-16	7.79549e-16	4.23827e-16	4.78976e-16	4.1406e-16		59	5.26816e-16	3.94711e-16
2.61822e-16	1.95766e-16	8.74876e-16	1.19607e-15	2.53947e-16	3.24665e-16	2.2231e-16	1.05007e-15	2.74904e-16	7.216e-16	4.43911e-16	4.42188e-16	4.38084e-16		60	5.15401e-16	3.22529e-16
1.70493e-16	2.22836e-16	8.26251e-16	1.09921e-15	2.03628e-16	2.78009e-16	2.38005e-16	1.0887e-15	2.49726e-16	7.67552e-16	3.90657e-16	4.55357e-16	4.0458e-16		61	4.91923e-16	3.234e-16
1.77308e-16	2.20857e-16	9.77757e-16	1.15004e-15	2.19763e-16	3.44999e-16	2.28416e-16	1.0174e-15	2.54319e-16	7.20865e-16	3.83061e-16	4.8553e-16	3.97642e-16		62	5.05996e-16	3.29324e-16
1.83361e-16	1.98146e-16	7.73065e-16	1.85689e-15	2.18769e-16	3.54219e-16	2.14897e-16	1.00385e-15	2.43512e-16	7.62687e-16	4.77386e-16	4.50271e-16	4.05378e-16		63	5.49417e-16	4.52136e-16
2.14503e-16	2.13875e-16	6.66093e-16	1.31627e-15	2.24896e-16	3.46392e-16	2.48754e-16	1.21109e-15	3.33876e-16	7.65264e-16	4.72332e-16	5.56286e-16	3.24967e-16		64	5.30353e-16	3.55815e-16
2.21297e-16	2.17347e-16	5.87483e-16	1.27316e-15	2.17108e-16	3.60633e-16	2.4441e-16	1.19368e-15	2.82325e-16	7.53113e-16	4.38108e-16	5.2196e-16	3.88196e-16		65	5.15294e-16	3.43533e-16
2.50181e-16	1.9845e-16	5.67219e-16	1.0706e-15	2.181e-16	4.0947e-16	2.95751e-16	1.13778e-15	3.09559e-16	7.64224e-16	4.14673e-16	5.6224e-16	3.84688e-16		66	5.06379e-16	2.97371e-16
2.58275e-16	2.14516e-16	7.08056e-16	1.18511e-15	2.56852e-16	4.72716e-16	2.9002e-16	1.11692e-15	2.79541e-16	7.92507e-16	3.97903e-16	6.03034e-16	3.15444e-16		67	5.30069e-16	3.18005e-16
2.03217e-16	2.49878e-16	6.98138e-16	1.64612e-15	2.38396e-16	4.82849e-16	2.89084e-16	1.1295e-15	3.4335e-16	7.39433e-16	5.18496e-16	6.61614e-16	4.73702e-16		68	5.90291e-16	3.938e-16
2.43461e-16	2.40879e-16	7.47815e-16	1.78723e-15	2.2361e-16	4.9697e-16	2.88125e-16	9.4502e-16	2.37772e-16	7.56743e-16	4.30094e-16	6.49334e-16	3.93931e-16		69	5.72383e-16	4.18391e-16
2.47799e-16	2.501e-16	7.09484e-16	1.33179e-15	2.01798e-16	4.52163e-16	3.25689e-16	9.12057e-16	2.6125e-16	8.01738e-16	5.77241e-16	7.59088e-16	3.15127e-16		70	5.4964e-16	3.25397e-16
1.91038e-16	2.40244e-16	6.58409e-16	1.35852e-15	2.7936e-16	4.3344e-16	3.70827e-16	1.03308e-15	2.77875e-16	8.10621e-16	6.35155e-16	7.01043e-16	3.6858e-16		71	5.66014e-16	3.33302e-16
2.64921e-16	2.35476e-16	6.25349e-16	1.17578e-15	2.49268e-16	4.23148e-16	3.17317e-16	9.28156e-16	2.38546e-16	7.75885e-16	5.598e-16	8.06549e-16	4.56681e-16		72	5.42836e-16	2.91301e-16
2.90526e-16	2.79474e-16	5.4259e-16	1.3725e-15	2.09852e-16	5.09313e-16	3.57559e-16	1.10518e-15	2.67768e-16	7.61314e-16	6.34876e-16	8.30155e-16	3.98437e-16		73	5.81503e-16	3.39655e-16
2.43862e-16	2.77993e-16	5.00889e-16	1.62084e-15	1.94183e-16	4.88643e-16	3.59752e-16	1.181e-15	3.20352e-16	7.43696e-16	5.76812e-16	7.49329e-16	3.47569e-16		74	5.84994e-16	3.95874e-16
2.54916e-16	2.67896e-16	6.11769e-16	1.42842e-15	2.07192e-16	6.22974e-16	3.3382e-16	1.02604e-15	2.75663e-16	8.2762e-16	6.22327e-16	8.88461e-16	2.59836e-16		75	5.86688e-16	3.59177e-16
2.69813e-16	3.27464e-16	6.2301e-16	1.30936e-15	1.75325e-16	5.98047e-16	3.5945e-16	1.09556e-15	2.85168e-16	7.83271e-16	5.26727e-16	9.04942e-16	2.51063e-16		76	5.77631e-16	3.41618e-16
2.75096e-16	2.40896e-16	6.60094e-16	2.55834e-15	2.32084e-16	5.90967e-16	3.34168e-16	1.0786e-15	2.90308e-16	9.28401e-16	5.671e-16	8.94771e-16	3.7935e-16		77	6.94629e-16	6.03349e-16
2.24464e-16	2.58721e-16	5.17155e-16	1.5391e-15	2.01217e-16	6.01103e-16	4.3279e-16	1.07123e-15	3.0842e-16	7.88555e-16	5.30508e-16	9.01355e-16	3.35075e-16		78	5.93053e-16	3.76327e-16
2.69109e-16	2.83701e-16	6.11613e-16	2.67211e-15	1.93627e-16	6.5597e-16	3.10709e-16	1.01291e-15	2.76218e-16	7.93833e-16	6.84015e-16	9.19576e-16	3.23834e-16		79	6.92864e-16	6.2889e-16
2.4712e-16	2.74301e-16	6.92076e-16	1.72643e-15	2.37045e-16	5.84177e-16	3.84025e-16	1.17589e-15	3.20251e-16	8.067e-16	7.28638e-16	9.18849e-16	3.01526e-16		80	6.45925e-16	4.22362e-16
2.75366e-16	2.54469e-16	5.41733e-16	2.4363e-15	2.06954e-16	7.58173e-16	4.05911e-16	1.0828e-15	2.74964e-16	8.29296e-16	6.3277e-16	8.66394e-16	3.85281e-16		81	6.88493e-16	5.70089e-16
2.75615e-16	3.36816e-16	7.09582e-16	2.58269e-15	2.28141e-16	7.08917e-16	3.21926e-16	1.19924e-15	3.02768e-16	7.59569e-16	6.11129e-16	9.60268e-16	4.10086e-16		82	7.23596e-16	6.06713e-16
2.38923e-16	3.13241e-16	7.76646e-16	1.42186e-15	2.50124e-16	7.87651e-16	3.43757e-16	1.19145e-15	2.7704e-16	7.71238e-16	7.18686e-16	9.67389e-16	2.93029e-16		83	6.42387e-16	3.76821e-16
2.50707e-16	2.53732e-16	6.18304e-16	1.2618e-15	1.64135e-16	7.47792e-16	3.82166e-16	1.21733e-15	3.20352e-16	7.83979e-16	6.85765e-16	7.34007e-16	4.60036e-16		84	6.06162e-16	3.37074e-16
2.40536e-16	2.74208e-16	5.78604e-16	2.19827e-15	1.89777e-16	7.38239e-16	3.46824e-16	1.10747e-15	3.26548e-16	8.09954e-16	4.6806e-15	1.00589e-15	3.23416e-16		85	9.86179e-16	1.18879e-15
2.59236e-16	3.21061e-16	6.23503e-16	1.41428e-15	2.1904e-16	9.27331e-16	3.78627e-16	1.16009e-15	3.04731e-16	8.66329e-16	6.8117e-16	8.49405e-16	3.08454e-16		86	6.39482e-16	3.68382e-16
2.75712e-16	2.75314e-16	6.94091e-16	2.46236e-15	1.87008e-16	9.31393e-16	3.38695e-16	1.16855e-15	3.28563e-16	8.34278e-16	7.39262e-16	8.5437e-16	2.4524e-16		87	7.18064e-16	5.8946e-16
2.52539e-16	2.97861e-16	7.75492e-16	2.61351e-15	2.51379e-16	9.46767e-16	3.93477e-16	1.1254e-15	3.19188e-16	8.11629e-16	7.15273e-16	9.28957e-16	3.11366e-16		88	7.49449e-16	6.13666e-16
3.37965e-16	3.42693e-16	8.83578e-16	1.48755e-15	2.41165e-16	8.22071e-16	4.28155e-16	1.13122e-15	3.10774e-16	8.57199e-16	8.69847e-15	9.17826e-16	2.75072e-16		89	1.28721e-15	2.17141e-15

## Sheet: CK-666_ec_f
2.69449e-16	2.94145e-16	6.95595e-16	1.90629e-15	2.08751e-16	8.52265e-16	3.77991e-16	1.15167e-15	3.18359e-16	8.27228e-16	2.70009e-15	8.81743e-16	3.20598e-16

## Sheet: CK-666+Y-27_ec
0	2.20978e-43	8.00876e-44	2.25738e-44	9.66432e-45	0	1.93437e-44	7.30019e-44	0	2.40504e-45	0	0	7.80074e-45			0	3.35273e-44	6.01315e-44
2.34413e-17	1.1649e-16	8.01408e-17	4.72621e-17	4.82468e-17	4.44802e-17	4.50472e-17	3.2125e-17	6.38781e-17	4.07893e-17	2.67376e-16	1.35492e-16	1.00485e-16			1	8.04041e-17	6.31175e-17
6.26833e-17	4.30389e-17	3.68889e-17	5.55957e-17	6.58494e-17	3.27507e-17	1.95663e-16	2.88253e-16	2.47939e-16	5.06599e-17	1.33428e-16	1.09304e-16	1.17056e-16			2	1.10701e-16	8.09548e-17
5.98472e-17	1.05737e-16	6.37515e-17	1.06187e-16	9.99926e-17	1.12164e-16	8.38139e-17	5.35575e-17	1.06397e-16	1.00399e-16	2.01207e-16	1.22125e-16	1.0737e-16			3	1.01734e-16	3.54672e-17
3.12094e-17	8.81599e-17	6.99283e-17	1.18994e-16	1.16712e-16	6.3277e-17	6.0744e-17	4.50091e-17	1.69838e-16	2.45283e-17	2.12071e-16	1.0157e-16	1.17685e-16			4	9.38251e-17	5.2097e-17
5.23864e-17	6.47936e-17	5.08523e-17	7.14607e-17	6.20975e-17	1.34395e-16	8.6582e-17	4.45958e-17	1.5584e-16	3.89297e-17	1.81442e-16	1.18765e-16	1.33767e-16			5	9.19929e-17	4.53578e-17
7.05911e-17	9.18039e-17	4.97587e-17	9.6173e-17	8.93483e-17	1.18181e-16	1.62474e-16	1.16551e-16	5.5399e-16	2.77543e-17	1.94451e-16	1.33278e-16	1.12383e-16			6	1.39749e-16	1.26813e-16
3.82787e-17	8.79236e-17	5.25311e-17	1.0574e-16	7.76657e-17	7.0769e-17	4.2155e-17	6.82188e-17	5.7877e-16	7.03487e-17	2.33858e-16	1.12889e-16	1.13398e-16			7	1.27119e-16	1.38884e-16
6.80622e-17	1.37406e-16	6.43039e-17	1.35309e-16	1.2429e-16	9.63224e-17	8.95807e-17	1.35285e-16	2.07483e-16	4.87974e-17	1.98672e-16	1.41212e-16	1.38697e-16			8	1.21955e-16	4.61911e-17
4.70613e-17	1.43775e-16	5.85265e-17	1.01447e-16	8.18041e-17	1.62578e-16	7.95769e-17	6.49631e-17	1.83711e-16	8.98816e-17	2.07829e-16	1.30865e-16	1.37909e-16			9	1.1461e-16	4.85835e-17
6.62898e-17	8.39494e-17	5.6276e-17	6.23623e-17	7.06313e-17	1.75674e-16	1.23084e-16	1.86453e-16	4.8339e-16	8.4935e-17	2.194e-16	1.31608e-16	1.30161e-16			10	1.4417e-16	1.10012e-16
4.06006e-17	1.19461e-16	5.58505e-17	1.37548e-16	1.14181e-16	1.44469e-16	1.2466e-16	1.1958e-16	3.0307e-16	5.33175e-17	2.01602e-16	1.38581e-16	1.2246e-16			11	1.28875e-16	6.52388e-17
5.24541e-17	7.44881e-17	6.05974e-17	9.9137e-17	9.74441e-17	1.72603e-16	1.47527e-16	1.24081e-16	2.8941e-16	1.15871e-16	1.87092e-16	1.35701e-16	1.64615e-16			12	1.32386e-16	6.08331e-17
5.97355e-17	7.32248e-17	6.01005e-17	9.78538e-17	1.00579e-16	3.93606e-17	1.31114e-16	1.3012e-16	2.063e-16	3.14157e-17	2.08014e-16	1.28443e-16	1.63276e-16			13	1.09964e-16	5.59396e-17
2.32563e-17	8.6416e-17	7.06233e-17	7.76596e-17	7.29945e-17	6.81187e-17	1.20664e-16	5.42745e-17	2.18642e-16	7.90483e-17	2.28698e-16	1.56601e-16	1.49285e-16			14	1.08175e-16	6.04735e-17
5.20806e-17	9.53072e-17	5.31489e-17	7.20383e-17	6.87683e-17	3.6353e-17	1.19442e-16	1.28268e-16	4.57217e-16	1.25824e-16	1.98265e-16	1.49741e-16	1.50345e-16			15	1.31292e-16	1.04405e-16
3.63345e-17	1.10371e-16	6.56278e-17	1.13452e-16	1.15192e-16	2.75863e-17	8.07101e-17	1.32816e-16	4.79597e-16	6.19528e-17	2.07937e-16	1.27637e-16	1.3524e-16			16	1.30342e-16	1.10827e-16
2.11778e-17	1.00958e-16	8.05764e-17	7.65712e-17	7.69595e-17	4.05e-17	1.16619e-16	6.42837e-17	2.62825e-16	1.14961e-16	2.54313e-16	1.4021e-16	1.65027e-16			17	1.16537e-16	7.10372e-17
4.72621e-17	9.18551e-17	9.32187e-17	1.12793e-16	1.06438e-16	6.95146e-17	8.93211e-17	1.57375e-16	2.59732e-16	8.70974e-17	2.09736e-16	1.56242e-16	1.40365e-16			18	1.24688e-16	5.68572e-17
6.88226e-17	1.08596e-16	6.49501e-17	6.24066e-17	5.38162e-17	2.95518e-17	9.90947e-17	2.20147e-16	3.76395e-16	9.61417e-17	2.70206e-16	1.64938e-16	1.5479e-16			19	1.36143e-16	9.64109e-17
5.77685e-17	1.25431e-16	1.04271e-16	7.72407e-17	7.4646e-17	5.74314e-17	9.09614e-17	1.48236e-16	3.64172e-16	8.06849e-17	2.36911e-16	1.64343e-16	1.62544e-16			20	1.34203e-16	8.30098e-17
4.29218e-17	1.23765e-16	8.57586e-17	5.61334e-17	4.86103e-17	1.14678e-16	1.36718e-16	1.36155e-16	3.2246e-16	1.60057e-16	2.53504e-16	1.98273e-16	1.45714e-16			21	1.40365e-16	7.77995e-17
4.19704e-17	1.03884e-16	7.93151e-17	1.22185e-16	1.14802e-16	1.48043e-16	1.72659e-16	9.9241e-17	2.01669e-16	1.66064e-16	2.57691e-16	1.63373e-16	1.49705e-16			22	1.40046e-16	5.35764e-17
3.17453e-17	1.02686e-16	8.06917e-17	1.21585e-16	1.17573e-16	1.35178e-16	1.23876e-16	9.8232e-17	2.19728e-16	1.84261e-16	2.20383e-16	1.38441e-16	1.63243e-16			23	1.33663e-16	5.13633e-17
5.60864e-17	1.31465e-16	1.24132e-16	9.61356e-17	1.09551e-16	4.21743e-17	1.8316e-16	6.2078e-17	2.59795e-16	1.52584e-16	2.72069e-16	1.60219e-16	1.46576e-16			24	1.38156e-16	6.79826e-17
3.38306e-17	1.26097e-16	1.05695e-16	1.25716e-16	1.22692e-16	2.81751e-17	1.61685e-16	2.29076e-16	3.04134e-16	2.28353e-16	2.19792e-16	1.50944e-16	1.70686e-16			25	1.54375e-16	7.52142e-17
5.13173e-17	1.21627e-16	1.22541e-16	1.33104e-16	1.25399e-16	1.86647e-16	7.23644e-17	1.5687e-16	3.54381e-16	1.34937e-16	2.45378e-16	1.49703e-16	1.71891e-16			26	1.55858e-16	7.37636e-17
8.01754e-17	1.0276e-16	1.22913e-16	8.67741e-17	9.79706e-17	1.35103e-16	7.68925e-17	2.33923e-16	3.27996e-16	1.85798e-16	2.81877e-16	1.69084e-16	1.73338e-16			27	1.59585e-16	7.7074e-17
5.07375e-17	1.09981e-16	1.10221e-16	8.7269e-17	8.45322e-17	3.45139e-17	7.70269e-17	1.47488e-16	5.76999e-16	2.78125e-16	2.73922e-16	2.27585e-16	1.60299e-16			28	1.70669e-16	1.39945e-16
8.09084e-17	1.21296e-16	1.07979e-16	1.46553e-16	8.07806e-17	5.7111e-17	1.3899e-16	7.58453e-17	4.49977e-16	2.52191e-16	3.13327e-16	2.29854e-16	1.5488e-16			29	1.69976e-16	1.09099e-16
7.89835e-17	1.1914e-16	1.1802e-16	1.17355e-16	1.16779e-16	1.45535e-16	9.95739e-17	1.322e-16	5.34177e-16	1.94599e-16	3.28878e-16	2.08212e-16	1.76154e-16			30	1.82277e-16	1.19026e-16
2.80333e-17	1.78495e-16	1.68125e-16	9.70035e-17	9.82627e-17	1.37678e-16	1.16423e-16	1.51048e-16	4.61542e-16	2.54412e-16	3.74969e-16	1.86573e-16	2.01671e-16			31	1.88787e-16	1.12934e-16
6.42903e-17	1.7465e-16	1.58239e-16	9.05559e-17	6.99111e-17	6.6953e-17	1.28166e-16	1.09604e-16	7.51138e-16	2.06599e-16	3.44414e-16	2.55569e-16	2.11439e-16			32	2.02425e-16	1.77272e-16
2.87769e-17	1.85421e-16	1.34872e-16	9.53641e-17	1.09198e-16	6.37899e-17	1.30512e-16	1.48141e-16	4.53213e-16	3.04986e-16	4.22434e-16	2.22456e-16	2.08007e-16			33	1.92859e-16	1.25133e-16
9.02419e-17	1.7735e-16	1.46961e-16	8.8037e-17	9.64399e-17	1.0095e-16	1.2212e-16	1.05824e-16	8.96482e-16	2.62233e-16	5.32803e-16	2.29887e-16	2.24995e-16			34	2.36486e-16	2.23143e-16
3.80773e-17	1.53421e-16	1.26371e-16	1.35158e-16	1.322e-16	5.7173e-17	7.33734e-17	1.26707e-16	6.61149e-16	2.92785e-16	4.06646e-16	2.80956e-16	1.96516e-16			35	2.06195e-16	1.65123e-16
1.25045e-16	1.83218e-16	1.61105e-16	1.78476e-16	2.58725e-16	9.00993e-17	1.24909e-16	1.44513e-16	8.88013e-16	3.41801e-16	3.94922e-16	2.5112e-16	1.94842e-16			36	2.56676e-16	2.00857e-16
4.79498e-17	1.78501e-16	1.45911e-16	1.14382e-16	1.15449e-16	1.13697e-16	1.43634e-16	2.21768e-16	6.62869e-16	3.55142e-16	4.97639e-16	3.12079e-16	2.29103e-16			37	2.41394e-16	1.68734e-16
5.66962e-17	1.56147e-16	1.1946e-16	1.02508e-16	1.49581e-16	3.35152e-17	1.34605e-16	1.04736e-16	7.741e-16	3.5293e-16	4.92474e-16	2.97951e-16	2.39588e-16			38	2.31869e-16	1.99719e-16
3.80543e-17	1.80636e-16	1.63408e-16	6.57136e-17	7.7329e-17	5.94163e-17	1.80725e-16	1.48847e-16	8.59665e-16	4.02215e-16	4.99538e-16	3.01484e-16	2.40839e-16			39	2.47528e-16	2.20514e-16
5.51563e-17	1.84353e-16	1.49009e-16	9.87458e-17	1.41283e-16	9.49257e-17	1.49291e-16	1.84039e-16	6.77177e-16	3.72671e-16	5.03511e-16	3.09118e-16	2.51935e-16			40	2.4394e-16	1.73322e-16
6.03729e-17	2.0631e-16	1.83159e-16	1.2053e-16	1.86902e-16	6.61183e-17	1.38171e-16	1.95623e-16	8.69066e-16	3.49426e-16	5.48592e-16	3.23701e-16	2.40923e-16			41	2.68377e-16	2.14075e-16
1.25453e-16	1.64041e-16	1.46561e-16	8.82371e-17	1.2706e-16	1.00665e-16	1.14781e-16	1.23824e-16	1.06294e-15	3.71263e-16	4.69151e-16	3.85554e-16	2.04294e-16			42	2.67987e-16	2.58881e-16
5.27694e-17	1.82683e-16	1.55824e-16	1.1793e-16	1.64222e-16	1.34073e-16	1.2289e-16	1.71783e-16	1.12712e-15	4.02031e-16	4.81287e-16	3.28633e-16	2.03578e-16			43	2.80371e-16	2.71053e-16
1.16559e-16	1.46226e-16	1.26811e-16	6.36657e-17	6.57116e-17	6.12292e-17	2.02817e-16	1.00861e-16	1.03034e-15	4.53089e-16	6.18844e-16	3.5638e-16	2.5812e-16			44	2.76973e-16	2.71842e-16
6.76232e-17	1.76652e-16	1.37584e-16	9.59147e-17	1.90346e-16	2.24253e-16	1.3881e-16	1.5409e-16	1.05097e-15	4.40681e-16	5.13449e-16	3.38781e-16	2.29802e-16			45	2.89151e-16	2.53664e-16
7.86831e-17	1.80165e-16	1.30445e-16	1.26436e-16	1.60801e-16	1.03374e-16	1.32884e-16	3.03805e-16	1.10022e-15	4.48769e-16	5.25201e-16	3.41058e-16	2.138e-16			46	2.95819e-16	2.67508e-16
5.75111e-17	1.93397e-16	1.39731e-16	9.14912e-17	1.46282e-16	1.29266e-16	1.72319e-16	1.79902e-16	1.28093e-15	4.17983e-16	6.46762e-16	3.77095e-16	2.3373e-16			47	3.128e-16	3.19545e-16
1.14898e-16	1.99312e-16	1.53117e-16	8.27556e-17	1.14997e-16	1.16207e-16	1.85367e-16	3.80786e-16	1.15391e-15	4.98898e-16	5.50831e-16	3.71849e-16	2.60032e-16			48	3.21766e-16	2.81901e-16
1.00831e-16	1.32798e-16	1.27504e-16	8.45297e-17	1.0089e-16	6.23418e-17	1.84199e-16	1.62989e-16	1.3806e-15	4.96887e-16	6.32614e-16	3.0489e-16	2.36683e-16			49	3.08289e-16	3.49984e-16
6.17008e-17	1.67387e-16	1.51462e-16	6.27476e-17	6.4169e-17	4.13475e-17	1.78973e-16	1.5324e-16	9.10263e-16	5.48061e-16	5.67545e-16	3.77567e-16	2.99395e-16			50	2.75681e-16	2.50429e-16
8.44489e-17	1.73792e-16	1.42491e-16	5.7247e-17	6.05494e-17	1.13967e-16	1.52251e-16	2.23764e-16	1.00104e-15	5.35089e-16	6.01111e-16	3.67908e-16	2.54487e-16			51	2.89857e-16	2.6435e-16
9.52082e-17	2.12226e-16	1.79506e-16	3.61886e-17	4.18506e-17	3.77985e-17	1.50437e-16	3.95335e-16	1.07815e-15	5.4214e-16	5.10418e-16	3.27879e-16	2.69452e-16			52	2.98199e-16	2.7883e-16
7.53043e-17	1.70159e-16	1.55897e-16	1.0643e-16	1.9647e-16	5.5977e-17	1.85952e-16	1.83921e-16	1.23212e-15	5.64252e-16	5.89983e-16	3.49073e-16	2.52925e-16			53	3.16805e-16	3.09597e-16
7.45636e-17	1.46102e-16	1.47047e-16	1.14376e-16	1.40982e-16	1.19578e-16	2.28729e-16	1.25645e-16	1.22102e-15	6.2918e-16	5.12013e-16	4.04678e-16	2.61992e-16			54	3.17378e-16	3.08314e-16
1.09394e-16	1.72377e-16	1.52554e-16	1.1343e-16	1.18606e-16	1.20075e-16	1.87542e-16	5.5697e-16	1.15885e-15	6.83517e-16	5.75705e-16	4.0967e-16	2.57516e-16			55	3.55093e-16	3.02327e-16
8.85004e-17	1.59047e-16	1.23766e-16	5.67094e-17	6.21819e-17	4.68075e-17	3.04589e-16	2.4432e-16	1.07806e-15	7.4121e-16	6.36904e-16	3.92361e-16	2.75577e-16			56	3.23849e-16	3.0305e-16
1.37895e-16	1.48672e-16	1.1991e-16	7.26792e-17	9.05e-17	1.15301e-16	3.23221e-16	1.66277e-16	1.16811e-15	6.4833e-16	5.15585e-16	4.15662e-16	2.64488e-16			57	3.22048e-16	2.98644e-16
1.14901e-16	2.15047e-16	1.74516e-16	1.01206e-16	1.37115e-16	6.39506e-17	3.19022e-16	3.30694e-16	1.15979e-15	6.5735e-16	5.44742e-16	3.92807e-16	3.49744e-16			58	3.50838e-16	2.88848e-16
8.81212e-17	1.32072e-16	1.23204e-16	6.19374e-17	9.76584e-17	1.06076e-16	2.40226e-16	2.20308e-16	9.99149e-16	7.82288e-16	6.32615e-16	4.24284e-16	2.52903e-16			59	3.20065e-16	2.90089e-16
1.54536e-16	1.59933e-16	1.51741e-16	9.41371e-17	1.12558e-16	5.1635e-17	2.93918e-16	3.312e-16	8.98722e-16	8.53098e-16	4.55067e-16	4.00119e-16	2.55645e-16			60	3.24024e-16	2.62516e-16
1.78013e-16	1.50659e-16	1.40523e-16	7.38223e-17	7.72089e-17	4.69786e-17	3.35798e-16	1.90897e-16	1.19579e-15	7.77501e-16	5.58704e-16	4.35843e-16	3.26787e-16			61	3.45271e-16	3.19918e-16
1.38457e-16	1.55172e-16	1.74927e-16	5.79294e-17	5.05682e-17	6.85232e-17	3.9087e-16	2.23002e-16	1.19109e-15	9.09041e-16	5.87247e-16	3.77842e-16	3.44763e-16			62	3.59187e-16	3.35272e-16
1.70775e-16	1.50355e-16	1.51147e-16	8.56368e-17	9.14259e-17	1.08033e-16	3.1948e-16	5.31613e-16	9.0715e-16	9.5967e-16	5.37348e-16	4.23429e-16	4.38699e-16			63	3.74981e-16	2.85966e-16
1.4017e-16	1.75131e-16	1.69776e-16	1.07581e-16	1.41474e-16	1.56068e-16	4.65721e-16	2.25872e-16	1.20036e-15	9.60651e-16	4.96328e-16	4.81855e-16	3.56413e-16			64	3.90569e-16	3.26896e-16
1.5487e-16	1.44223e-16	1.30481e-16	4.89013e-17	5.66991e-17	7.27503e-17	4.12528e-16	1.99279e-16	1.22206e-15	9.54933e-16	4.93927e-16	4.85328e-16	3.60891e-16			65	3.64375e-16	3.47705e-16
1.17565e-16	1.9018e-16	1.34528e-16	4.7619e-17	5.06437e-17	1.87636e-16	3.30381e-16	2.78241e-16	1.14001e-15	9.14833e-16	5.15439e-16	5.3761e-16	2.89726e-16			66	3.64186e-16	3.21735e-16
1.25848e-16	1.28143e-16	1.40383e-16	8.78082e-17	1.13658e-16	4.88803e-17	3.2948e-16	7.00425e-16	1.06634e-15	9.64416e-16	5.16288e-16	4.72204e-16	2.98615e-16			67	3.84037e-16	3.28482e-16
9.37284e-17	1.57505e-16	1.19924e-16	7.56553e-17	7.62539e-17	1.64354e-16	3.51012e-16	5.11308e-16	1.32944e-15	9.65717e-16	5.34314e-16	4.43104e-16	2.83693e-16			68	3.9277e-16	3.64588e-16
1.86188e-16	1.84603e-16	1.28166e-16	8.75618e-17	8.44989e-17	7.36082e-17	3.79164e-16	2.51997e-16	1.36914e-15	1.03247e-15	5.11461e-16	4.17606e-16	2.88398e-16			69	3.8422e-16	3.77566e-16
1.11809e-16	1.74714e-16	1.5327e-16	1.112e-16	1.33045e-16	5.85331e-17	5.03233e-16	2.32284e-16	1.1943e-15	1.0238e-15	5.03362e-16	5.052e-16	2.84445e-16			70	3.83784e-16	3.46016e-16
1.60218e-16	1.33142e-16	1.76846e-16	5.45592e-17	6.27948e-17	5.13095e-17	4.8145e-16	3.59119e-16	1.24497e-15	7.71179e-16	5.36585e-16	5.28141e-16	2.8004e-16			71	3.72335e-16	3.31976e-16
1.7277e-16	1.25866e-16	1.25644e-16	7.56147e-17	8.22275e-17	7.73227e-17	3.85357e-16	4.00756e-16	1.24233e-15	7.57961e-16	6.01136e-16	5.62785e-16	3.15447e-16			72	3.78863e-16	3.30332e-16
9.76373e-17	1.44508e-16	1.23202e-16	8.1158e-17	7.62998e-17	1.22677e-16	4.90614e-16	2.94189e-16	1.18316e-15	9.06837e-16	4.78077e-16	4.3035e-16	2.77809e-16			73	3.6204e-16	3.29278e-16
1.06174e-16	1.46578e-16	1.35163e-16	1.01248e-16	1.0794e-16	1.00382e-16	5.13334e-16	3.13785e-16	1.1282e-15	9.01595e-16	5.97915e-16	5.131e-16	2.66767e-16			74	3.79399e-16	3.22415e-16
1.56439e-16	1.82215e-16	1.47001e-16	6.28124e-17	7.14226e-17	6.84483e-17	4.82252e-16	2.98574e-16	1.34824e-15	8.11316e-16	5.21086e-16	5.69265e-16	3.17545e-16			75	3.87432e-16	3.54726e-16
1.74872e-16	1.56842e-16	1.57133e-16	6.04531e-17	4.32915e-17	7.3257e-17	6.04387e-16	2.41542e-16	1.39358e-15	8.16568e-16	4.84906e-16	6.22236e-16	2.88428e-16			76	3.93653e-16	3.73571e-16
1.52129e-16	1.42624e-16	1.63139e-16	9.91989e-17	1.06936e-16	5.39742e-17	4.55004e-16	4.45928e-16	1.04602e-15	8.32604e-16	4.99279e-16	5.57319e-16	3.05489e-16			77	3.73819e-16	2.94062e-16
2.22222e-16	1.65397e-16	1.53468e-16	8.53111e-17	9.35505e-17	1.04963e-16	5.59982e-16	2.29602e-16	1.25075e-15	9.46244e-16	4.9418e-16	5.22523e-16	3.20294e-16			78	3.96037e-16	3.43536e-16
1.18228e-16	1.42353e-16	1.47328e-16	9.86656e-17	8.05915e-17	1.95001e-16	5.25213e-16	3.41911e-16	1.23654e-15	8.69377e-16	5.48842e-16	6.48923e-16	2.62678e-16			79	4.01204e-16	3.38161e-16
1.29458e-16	1.34829e-16	1.26422e-16	1.05034e-16	9.52594e-17	7.82035e-17	5.24018e-16	3.19821e-16	1.26633e-15	1.01515e-15	5.92513e-16	6.09689e-16	3.09588e-16			80	4.08178e-16	3.65941e-16
1.52937e-16	1.64785e-16	1.27625e-16	8.30609e-17	7.42599e-17	1.52077e-16	5.302e-16	4.4359e-16	1.29822e-15	8.98032e-16	4.80401e-16	5.70481e-16	2.79169e-16			81	4.04218e-16	3.48861e-16
1.98214e-16	1.73275e-16	1.6832e-16	1.15969e-16	1.04777e-16	1.70064e-16	4.61559e-16	2.98807e-16	1.0805e-15	9.69465e-16	5.30988e-16	5.75251e-16	2.75288e-16			82	3.94037e-16	3.07704e-16
1.06146e-16	1.61463e-16	1.55751e-16	1.04247e-16	1.26656e-16	1.62448e-16	5.42514e-16	2.26336e-16	8.71668e-16	9.94755e-16	6.21301e-16	6.02755e-16	2.87048e-16			83	3.81776e-16	2.97001e-16
1.35207e-16	1.01092e-16	1.22733e-16	7.82964e-17	8.02951e-17	6.50724e-17	4.76501e-16	3.68377e-16	1.07857e-15	8.52357e-16	5.55807e-16	6.54294e-16	2.65529e-16			84	3.71856e-16	3.18999e-16
1.54156e-16	1.47164e-16	1.4035e-16	8.26593e-17	7.53141e-17	1.5124e-16	6.26817e-16	2.18075e-16	1.0046e-15	8.73963e-16	5.91546e-16	5.27732e-16	2.76097e-16			85	3.74593e-16	3.03122e-16
1.44681e-16	1.29262e-16	1.4257e-16	7.52051e-17	7.21645e-17	4.95309e-17	5.88944e-16	3.06678e-16	1.19006e-15	8.87709e-16	5.55727e-16	5.70198e-16	2.92397e-16			86	3.8501e-16	3.40688e-16
1.49789e-16	1.05341e-16	1.02729e-16	6.77647e-17	7.0114e-17	1.10142e-16	5.1942e-16	2.8576e-16	1.21972e-15	8.39539e-16	4.95273e-16	5.58809e-16	2.92617e-16			87	3.7054e-16	3.36043e-16
9.66997e-17	1.21197e-16	1.26179e-16	6.54719e-17	9.20893e-17	2.18212e-16	5.30342e-16	3.80576e-16	1.01221e-15	9.22274e-16	5.44799e-16	5.60835e-16	3.14175e-16			88	3.83466e-16	3.03828e-16
1.33989e-16	1.35836e-16	1.25471e-16	7.82346e-17	8.136e-17	8.19484e-17	4.61992e-16	4.03204e-16	1.26732e-15	1.01067e-15	4.56913e-16	5.23605e-16	2.91657e-16			89	3.88631e-16	3.59458e-16

## Sheet: CK-666+Y-27_ec_f
1.35754e-16	1.23316e-16	1.26672e-16	7.46053e-17	7.85562e-17	1.12691e-16	5.34003e-16	3.27112e-16	1.12875e-15	8.97753e-16	5.33344e-16	5.65912e-16	2.88745e-16

## Sheet: average all without outliers
control	0	6.20819e-44	7.24863e-44		Y-27	6.1279e-44	8.04104e-44		CK-666	3.77752e-44	4.34566e-44		CK-666+Y-27	3.35273e-44	6.01315e-44		Outliers originated from the drift were deleted manually
9	1	9.0385e-17	8.40409e-17		16	6.7656e-17	4.07971e-17		13	5.3239e-17	1.64793e-17		13	8.04041e-17	6.31175e-17
	2	1.40741e-16	2.23578e-16			7.97549e-17	5.68911e-17			5.66539e-17	2.0737e-17			1.10701e-16	8.09548e-17
	3		1.40583e-15			7.9821e-17	4.45998e-17			6.81091e-17	3.69143e-17			1.01734e-16	3.54672e-17
	4	6.84676e-17	4.6604e-17			9.27083e-17	1.0104e-16			8.00696e-17	3.47613e-17			9.38251e-17	5.2097e-17
	5	8.13027e-17	3.88717e-17			8.5136e-17	7.00251e-17			8.01583e-17	4.02364e-17			9.19929e-17	4.53578e-17
	6	1.00256e-16	6.73676e-17			8.58259e-17	6.14927e-17			7.52495e-17	3.15794e-17			1.39749e-16	1.26813e-16
	7	1.26691e-16	1.40392e-16			6.78469e-17	2.9267e-17			7.44024e-17	3.56996e-17			1.27119e-16	1.38884e-16
	8	1.4628e-16	1.96509e-16			7.75882e-17	4.17558e-17			9.15667e-17	4.02512e-17			1.21955e-16	4.61911e-17
	9		7.08274e-16			7.04112e-17	4.23111e-17			7.46489e-17	3.07561e-17			1.1461e-16	4.85835e-17
	10		1.0017e-15			8.78879e-17	4.05094e-17			9.5342e-17	5.1437e-17			1.4417e-16	1.10012e-16
	11	2.36423e-16	3.41749e-16			8.51811e-17	4.70754e-17			1.05749e-16	6.62796e-17			1.28875e-16	6.52388e-17
	12	3.37465e-16	4.95644e-16			9.35468e-17	5.2892e-17			1.09709e-16	7.37015e-17			1.32386e-16	6.08331e-17
	13	3.23453e-16	5.40937e-16			8.0266e-17	3.27347e-17			1.11405e-16	8.24324e-17			1.09964e-16	5.59396e-17
	14	3.35472e-16	6.27442e-16			9.33359e-17	4.67706e-17			1.14679e-16	8.716e-17			1.08175e-16	6.04735e-17
	15		2.05177e-15			1.01345e-16	5.90586e-17			1.37877e-16	1.13496e-16			1.31292e-16	1.04405e-16
	16	4.75629e-16	9.41085e-16			9.54773e-17	2.46471e-17			1.47391e-16	1.31636e-16			1.30342e-16	1.10827e-16
	17	5.99209e-16	1.33331e-15			1.11916e-16	6.51675e-17			1.53888e-16	1.09145e-16			1.16537e-16	7.10372e-17
	18	4.96876e-16	9.23075e-16			1.36426e-16	7.21091e-17			1.6791e-16	1.61214e-16			1.24688e-16	5.68572e-17
	19	5.12961e-16	9.37821e-16			1.31672e-16	6.42756e-17			1.92757e-16	1.83882e-16			1.36143e-16	9.64109e-17
	20	6.41136e-16	1.204e-15			1.3793e-16	4.98802e-17			2.16849e-16	2.08047e-16			1.34203e-16	8.30098e-17
	21	7.36013e-16	1.50399e-15			1.32951e-16	5.13721e-17			2.1904e-16	2.34102e-16			1.40365e-16	7.77995e-17
	22	8.09804e-16	1.27918e-15			1.5421e-16	6.43659e-17			2.3424e-16	2.47603e-16			1.40046e-16	5.35764e-17
	23	7.44199e-16	1.26347e-15			1.68684e-16	5.51601e-17			2.32906e-16	2.51871e-16			1.33663e-16	5.13633e-17
	24	7.59833e-16	1.3411e-15			1.61257e-16	6.57211e-17			2.66614e-16	2.70057e-16			1.38156e-16	6.79826e-17
	25	8.31884e-16	1.44635e-15			1.9042e-16	7.43747e-17			2.88438e-16	3.09576e-16			1.54375e-16	7.52142e-17
	26	8.23304e-16	1.33008e-15			1.80467e-16	6.33831e-17			3.12439e-16	3.30641e-16			1.55858e-16	7.37636e-17
	27	8.43417e-16	1.29771e-15			1.94972e-16	1.03865e-16			3.31746e-16	3.47233e-16			1.59585e-16	7.7074e-17
	28	9.17648e-16	1.40448e-15			2.22679e-16	9.66343e-17			3.14756e-16	3.04244e-16			1.70669e-16	1.39945e-16
	29		2.85132e-15			2.01886e-16	7.15247e-17			3.4296e-16	3.55569e-16			1.69976e-16	1.09099e-16
	30		2.88746e-15			2.05071e-16	9.48088e-17			3.67583e-16	4.04979e-16			1.82277e-16	1.19026e-16
	31		1.77928e-15			1.98072e-16	8.73466e-17			3.86788e-16	3.92892e-16			1.88787e-16	1.12934e-16
	32	1.04079e-15	1.43907e-15			2.15282e-16	9.98625e-17			3.48806e-16	3.60602e-16			2.02425e-16	1.77272e-16
	33		2.86602e-15			2.17535e-16	9.16186e-17			3.78712e-16	4.21941e-16			1.92859e-16	1.25133e-16
	34	1.12452e-15	1.50368e-15			2.28213e-16	1.1609e-16			4.05919e-16	4.37908e-16			2.36486e-16	2.23143e-16
	35	1.14054e-15	1.44106e-15			2.64038e-16	1.09162e-16			4.11696e-16	4.67717e-16			2.06195e-16	1.65123e-16
	36		3.06199e-15			2.5203e-16	1.33245e-16			4.07783e-16	4.10001e-16			2.56676e-16	2.00857e-16
	37	1.24029e-15	1.50665e-15			2.66001e-16	1.23649e-16			4.1503e-16	4.61798e-16			2.41394e-16	1.68734e-16
	38	1.2376e-15	1.453e-15			2.64225e-16	1.24893e-16			4.13416e-16	4.3983e-16			2.31869e-16	1.99719e-16
	39	1.29934e-15	1.49335e-15			2.68395e-16	1.28248e-16			4.41795e-16	4.79095e-16			2.47528e-16	2.20514e-16
	40		3.1502e-15			2.77457e-16	1.25392e-16			4.40489e-16	4.57214e-16			2.4394e-16	1.73322e-16
	41	1.3806e-15	1.47286e-15			2.7841e-16	1.15952e-16			4.47155e-16	4.59379e-16			2.68377e-16	2.14075e-16
	42	1.36703e-15	1.3417e-15			2.84282e-16	1.30571e-16			4.21527e-16	4.13751e-16			2.67987e-16	2.58881e-16
	43	1.3912e-15	1.36634e-15			2.74647e-16	1.38066e-16			4.59476e-16	4.97811e-16			2.80371e-16	2.71053e-16
	44	1.50907e-15	1.37635e-15			2.89461e-16	1.30352e-16			4.58594e-16	4.8978e-16			2.76973e-16	2.71842e-16
	45	1.58751e-15	1.41743e-15			2.69767e-16	1.33835e-16			4.51943e-16	4.22588e-16			2.89151e-16	2.53664e-16
	46	1.56533e-15	1.32266e-15			2.83353e-16	1.31175e-16			4.58916e-16	4.32736e-16			2.95819e-16	2.67508e-16
	47	1.95273e-15	2.13838e-15			2.905e-16	1.41836e-16			4.36603e-16	3.59721e-16			3.128e-16	3.19545e-16
	48	1.84772e-15	1.74907e-15			3.14479e-16	1.43352e-16			4.53286e-16	3.65025e-16			3.21766e-16	2.81901e-16
	49	2.02106e-15	1.42951e-15			3.19827e-16	1.45983e-16			5.26451e-16	5.49529e-16			3.08289e-16	3.49984e-16
	50		3.25571e-15			3.3768e-16	1.73339e-16			4.77864e-16	4.06445e-16			2.75681e-16	2.50429e-16
	51	1.86202e-15	1.37268e-15			3.0101e-16	1.16599e-16			4.44105e-16	3.56568e-16			2.89857e-16	2.6435e-16
	52	2.04216e-15	1.69257e-15			3.23354e-16	1.56775e-16			4.25632e-16	3.44657e-16			2.98199e-16	2.7883e-16
	53	1.94212e-15	1.37806e-15			3.17258e-16	1.48728e-16			4.70977e-16	3.98082e-16			3.16805e-16	3.09597e-16
	54		2.5627e-15			3.05208e-16	1.32785e-16			4.52629e-16	3.29317e-16			3.17378e-16	3.08314e-16
	55		2.36787e-15			3.33866e-16	1.75454e-16			4.71324e-16	3.49982e-16			3.55093e-16	3.02327e-16
	56	2.08325e-15	1.57887e-15			3.18414e-16	1.55e-16			4.47443e-16	2.9186e-16			3.23849e-16	3.0305e-16
	57	2.18984e-15	1.57427e-15			3.04855e-16	1.31979e-16			4.51686e-16	3.37781e-16			3.22048e-16	2.98644e-16
	58		2.61669e-15			3.36379e-16	1.61963e-16			4.7996e-16	3.14515e-16			3.50838e-16	2.88848e-16
	59	2.07158e-15	1.58401e-15			3.6096e-16	1.72281e-16			5.26816e-16	3.94711e-16			3.20065e-16	2.90089e-16
	60		2.55179e-15			3.23725e-16	1.55208e-16			5.15401e-16	3.22529e-16			3.24024e-16	2.62516e-16
	61	2.04544e-15	1.4825e-15			3.27897e-16	1.6667e-16			4.91923e-16	3.234e-16			3.45271e-16	3.19918e-16
	62	2.06455e-15	1.53247e-15			3.22225e-16	1.67081e-16			5.05996e-16	3.29324e-16			3.59187e-16	3.35272e-16
	63	2.36349e-15	2.27073e-15			3.43509e-16	1.62234e-16			5.49417e-16	4.52136e-16			3.74981e-16	2.85966e-16
	64	2.27638e-15	1.9862e-15			3.3674e-16	1.72893e-16			5.30353e-16	3.55815e-16			3.90569e-16	3.26896e-16
	65		3.68577e-15			3.43235e-16	1.65865e-16			5.15294e-16	3.43533e-16			3.64375e-16	3.47705e-16
	66	2.2426e-15	1.54513e-15			3.47587e-16	1.44552e-16			5.06379e-16	2.97371e-16			3.64186e-16	3.21735e-16
	67	2.15716e-15	1.80567e-15			3.60522e-16	1.75208e-16			5.30069e-16	3.18005e-16			3.84037e-16	3.28482e-16
	68	2.1811e-15	1.88285e-15			3.58057e-16	1.62568e-16			5.90291e-16	3.938e-16			3.9277e-16	3.64588e-16
	69	2.10555e-15	1.68386e-15			3.60305e-16	1.58099e-16			5.72383e-16	4.18391e-16			3.8422e-16	3.77566e-16
	70	2.1283e-15	1.6155e-15			3.69552e-16	1.97266e-16			5.4964e-16	3.25397e-16			3.83784e-16	3.46016e-16
	71	2.19209e-15	1.76863e-15			3.93531e-16	2.08672e-16			5.66014e-16	3.33302e-16			3.72335e-16	3.31976e-16
	72	2.19353e-15	1.73775e-15			3.68545e-16	2.00302e-16			5.42836e-16	2.91301e-16			3.78863e-16	3.30332e-16
	73	2.43724e-15	1.66771e-15			3.76564e-16	1.93849e-16			5.81503e-16	3.39655e-16			3.6204e-16	3.29278e-16
	74	2.21871e-15	1.6907e-15			3.46103e-16	1.7369e-16			5.84994e-16	3.95874e-16			3.79399e-16	3.22415e-16
	75		2.04107e-15			3.47007e-16	1.67235e-16			5.86688e-16	3.59177e-16			3.87432e-16	3.54726e-16
	76	2.26591e-15	1.8081e-15			3.69866e-16	1.90082e-16			5.77631e-16	3.41618e-16			3.93653e-16	3.73571e-16
	77		2.88972e-15			3.8085e-16	2.04291e-16			6.94629e-16	6.03349e-16			3.73819e-16	2.94062e-16
	78	2.17181e-15	1.57872e-15			3.79197e-16	1.69817e-16			5.93053e-16	3.76327e-16			3.96037e-16	3.43536e-16
	79	2.21511e-15	1.65748e-15			3.8207e-16	1.93598e-16			6.92864e-16	6.2889e-16			4.01204e-16	3.38161e-16
	80	2.32048e-15	1.66076e-15			3.74376e-16	1.8547e-16			6.45925e-16	4.22362e-16			4.08178e-16	3.65941e-16
	81	2.23393e-15	1.75809e-15			3.62241e-16	1.60434e-16			6.88493e-16	5.70089e-16			4.04218e-16	3.48861e-16
	82	2.16003e-15	1.64388e-15			3.94055e-16	2.02058e-16			7.23596e-16	6.06713e-16			3.94037e-16	3.07704e-16
	83	2.19084e-15	1.69029e-15			3.77469e-16	1.81974e-16			6.42387e-16	3.76821e-16			3.81776e-16	2.97001e-16
	84	2.37822e-15	1.62898e-15			3.65246e-16	1.83828e-16			6.06162e-16	3.37074e-16			3.71856e-16	3.18999e-16
	85	2.20549e-15	1.77165e-15			3.9417e-16	1.88415e-16				1.18879e-15			3.74593e-16	3.03122e-16
	86		3.41196e-15			3.77836e-16	1.82446e-16			6.39482e-16	3.68382e-16			3.8501e-16	3.40688e-16
	87	2.45438e-15	2.44246e-15			4.085e-16	1.99185e-16			7.18064e-16	5.8946e-16			3.7054e-16	3.36043e-16
	88	2.43106e-15	2.41431e-15			3.87792e-16	1.84396e-16			7.49449e-16	6.13666e-16			3.83466e-16	3.03828e-16
	89	2.25787e-15	1.81619e-15			3.84088e-16	1.95762e-16				2.17141e-15			3.88631e-16	3.59458e-16
