# Supplementary material for: A mechano-osmotic feedback couples cell volume to the rate of cell deformation
Source: eLife journal article supplement (doi:10.7554/elife.72381), 2022-04-13
Supplement: supp [file V.xlsx]

## Sheet: Sheet1
bp	a	m	id
Stack:p41_w11 GFP_t37	838.706	736.774	617937
Stack:p41_w11 GFP_t38	838.706	161.745	135657
sp	a	m	id		real V	alpha	h
Stack:p41_w11 GFP_t37	12.481	1602.55	20001		24.962	70.0153	21.1502
Stack:p41_w11 GFP_t38	12.481	854.633	10666.5		24.962	73.8444	10.0289
b	a	m	id
Stack:p41_w11 GFP_t37	12.481	1742.58	21748.7
Stack:p41_w11 GFP_t38	12.481	1002.33	12509.8

## Sheet: Sheet2
ID	lineage	Frame	Cell_Intensisty				d	r	V
47 unconf last 8 AP.tif	1	1	2765.42	100	0		17.74	8.87	2923.21
47 unconf last 8 AP.tif	1	2	2775.46	100.363	30
47 unconf last 8 AP.tif	1	3	2765.15	99.99	60
47 unconf last 8 AP.tif	1	4	2775.82	100.376	90
47 unconf last 8 AP.tif	1	5	2774.33	100.322	120
47 unconf last 8 AP.tif	1	6	2777.73	100.445	150
47 unconf last 8 AP.tif	1	7	2765.65	100.008	180
47 unconf last 8 AP.tif	1	8	2767.66	100.081	210
70 confined first 20.tif	1	9	2454.22	88.7465	240
70 confined first 20.tif	1	10	2471.55	89.3732	270
70 confined first 20.tif	1	11	2454.19	88.7457	300
70 confined first 20.tif	1	12	2473.74	89.4526	330
70 confined first 20.tif	1	13	2473.69	89.4508	360
70 confined first 20.tif	1	14	2468.75	89.272	390
70 confined first 20.tif	1	15	2473.11	89.4299	420
70 confined first 20.tif	1	16	2491.68	90.101	450
70 confined first 20.tif	1	17	2483.61	89.8095	480
70 confined first 20.tif	1	18	2483.27	89.797	510
70 confined first 20.tif	1	19	2462.51	89.0463	540
70 confined first 20.tif	1	20	2489.62	90.0268	570
70 confined first 20.tif	1	21	2476.04	89.5356	600
70 confined first 20.tif	1	22	2475.69	89.5229	630
70 confined first 20.tif	1	23	2490.07	90.0428	660
70 confined first 20.tif	1	24	2472.64	89.4126	690
70 confined first 20.tif	1	25	2485.35	89.8721	720
70 confined first 20.tif	1	26	2487.17	89.9382	750
70 confined first 20.tif	1	27	2479	89.6426	780
70 confined first 20.tif	1	28	2482.03	89.7521	810
47 unconf last 8 AP.tif	2	1	1858.5	100	0
47 unconf last 8 AP.tif	2	2	1850.44	99.5664	30
47 unconf last 8 AP.tif	2	3	1844.93	99.27	60
47 unconf last 8 AP.tif	2	4	1861.82	100.179	90
47 unconf last 8 AP.tif	2	5	1875.29	100.904	120
47 unconf last 8 AP.tif	2	6	1828.24	98.372	150
47 unconf last 8 AP.tif	2	7	1850.33	99.5605	180
47 unconf last 8 AP.tif	2	8	1823.21	98.1015	210
70 confined first 20.tif	2	9	1721.32	92.619	240
70 confined first 20.tif	2	10	1709.19	91.9662	270
70 confined first 20.tif	2	11	1729.77	93.0735	300
70 confined first 20.tif	2	12	1737.6	93.4948	330
70 confined first 20.tif	2	13	1745.73	93.9324	360
70 confined first 20.tif	2	14	1734.1	93.3068	390
70 confined first 20.tif	2	15	1728.87	93.025	420
70 confined first 20.tif	2	16	1723.76	92.75	450
70 confined first 20.tif	2	17	1734.04	93.3033	480
70 confined first 20.tif	2	18	1732.22	93.2054	510
70 confined first 20.tif	2	19	1742.46	93.7564	540
70 confined first 20.tif	2	20	1732.84	93.2387	570
70 confined first 20.tif	2	21	1739.15	93.5784	600
70 confined first 20.tif	2	22	1732.09	93.1986	630
70 confined first 20.tif	2	23	1735.57	93.3856	660
70 confined first 20.tif	2	24	1740.61	93.6569	690
70 confined first 20.tif	2	25	1714.59	92.257	720
70 confined first 20.tif	2	26	1742.01	93.732	750
70 confined first 20.tif	2	27	1731.68	93.1762	780
70 confined first 20.tif	2	28	1733.99	93.3009	810
47 unconf last 8 AP.tif	3	1	2643.04	100	0		17.37	8.685	2744.09
47 unconf last 8 AP.tif	3	2	2649.45	100.243	30
47 unconf last 8 AP.tif	3	3	2618.66	99.0777	60
47 unconf last 8 AP.tif	3	4	2638.61	99.8324	90
47 unconf last 8 AP.tif	3	5	2647.85	100.182	120
47 unconf last 8 AP.tif	3	6	2612.34	98.8384	150
47 unconf last 8 AP.tif	3	7	2654.32	100.427	180
47 unconf last 8 AP.tif	3	8	2665.92	100.866	210
70 confined first 20.tif	3	9	2424.17	91.7188	240
70 confined first 20.tif	3	10	2403.6	90.9407	270
70 confined first 20.tif	3	11	2395.01	90.6158	300
70 confined first 20.tif	3	12	2419.15	91.5292	330
70 confined first 20.tif	3	13	2411.26	91.2306	360
70 confined first 20.tif	3	14	2428.4	91.8789	390
70 confined first 20.tif	3	15	2413.3	91.3076	420
70 confined first 20.tif	3	16	2400.15	90.8102	450
70 confined first 20.tif	3	17	2417.39	91.4625	480
70 confined first 20.tif	3	18	2413.87	91.3293	510
70 confined first 20.tif	3	19	2396.2	90.6607	540
70 confined first 20.tif	3	20	2411.94	91.2563	570
70 confined first 20.tif	3	21	2433.43	92.0691	600
70 confined first 20.tif	3	22	2418.46	91.503	630
70 confined first 20.tif	3	23	2435.63	92.1525	660
70 confined first 20.tif	3	24	2416.7	91.4364	690
70 confined first 20.tif	3	25	2421.45	91.6161	720
70 confined first 20.tif	3	26	2419.98	91.5605	750
70 confined first 20.tif	3	27	2419.1	91.5272	780
70 confined first 20.tif	3	28	2411.06	91.2229	810
47 unconf last 8 AP.tif	4	1	2116.64	100	0
47 unconf last 8 AP.tif	4	2	2127.25	100.501	30
47 unconf last 8 AP.tif	4	3	2103.13	99.3619	60
47 unconf last 8 AP.tif	4	4	2116.54	99.9954	90
47 unconf last 8 AP.tif	4	5	2099.34	99.1828	120
47 unconf last 8 AP.tif	4	6	2112.11	99.7858	150
47 unconf last 8 AP.tif	4	7	2121.49	100.229	180
47 unconf last 8 AP.tif	4	8	2090.14	98.7479	210
70 confined first 20.tif	4	9	2089.47	98.7163	240
70 confined first 20.tif	4	10	2057.09	97.1864	270
70 confined first 20.tif	4	11	2067.29	97.6682	300
70 confined first 20.tif	4	12	2081.42	98.3361	330
70 confined first 20.tif	4	13	2051.76	96.9348	360
70 confined first 20.tif	4	14	2057	97.1823	390
70 confined first 20.tif	4	15	2066.05	97.6097	420
70 confined first 20.tif	4	16	2061.7	97.4046	450
70 confined first 20.tif	4	17	2061.02	97.3722	480
70 confined first 20.tif	4	18	2076.86	98.1208	510
70 confined first 20.tif	4	19	2086.32	98.5675	540
70 confined first 20.tif	4	20	2068	97.702	570
70 confined first 20.tif	4	21	2063.77	97.5024	600
70 confined first 20.tif	4	22	2044.6	96.5966	630
70 confined first 20.tif	4	23	2062.59	97.4462	660
70 confined first 20.tif	4	24	2063.94	97.5101	690
70 confined first 20.tif	4	25	2061.83	97.4104	720
70 confined first 20.tif	4	26	2062.85	97.4586	750
70 confined first 20.tif	4	27	2082.13	98.3696	780
70 confined first 20.tif	4	28	2077.07	98.1306	810
47 unconf last 8 AP.tif	5	1	2185.03	100	0		15.16	7.58	1824.3
47 unconf last 8 AP.tif	5	2	2182.37	99.8782	30
47 unconf last 8 AP.tif	5	3	2197.55	100.573	60
47 unconf last 8 AP.tif	5	4	2188.06	100.139	90
47 unconf last 8 AP.tif	5	5	2202.95	100.82	120
47 unconf last 8 AP.tif	5	6	2187.05	100.092	150
47 unconf last 8 AP.tif	5	7	2210.04	101.145	180
47 unconf last 8 AP.tif	5	8	2211.73	101.222	210
70 confined first 20.tif	5	9	2045.72	93.6247	240
70 confined first 20.tif	5	10	2036.13	93.1855	270
70 confined first 20.tif	5	11	2012.86	92.1208	300
70 confined first 20.tif	5	12	2033.89	93.0829	330
70 confined first 20.tif	5	13	2050.24	93.8315	360
70 confined first 20.tif	5	14	2037.88	93.2659	390
70 confined first 20.tif	5	15	2034.3	93.1017	420
70 confined first 20.tif	5	16	2040.83	93.4006	450
70 confined first 20.tif	5	17	2046.47	93.6588	480
70 confined first 20.tif	5	18	2061.16	94.3311	510
70 confined first 20.tif	5	19	2043.22	93.5102	540
70 confined first 20.tif	5	20	2047.42	93.7022	570
70 confined first 20.tif	5	21	2039.29	93.3304	600
70 confined first 20.tif	5	22	2043.11	93.5052	630
70 confined first 20.tif	5	23	2041.28	93.4215	660
70 confined first 20.tif	5	24	2055.51	94.0726	690
70 confined first 20.tif	5	25	2043.84	93.5384	720
70 confined first 20.tif	5	26	2035.92	93.1761	750
70 confined first 20.tif	5	27	2042.63	93.4833	780
70 confined first 20.tif	5	28	2038.53	93.2955	810
47 unconf last 8 AP.tif	6	1	2304.26	100	0		16.6	8.3	2395.1
47 unconf last 8 AP.tif	6	2	2308.74	100.194	30
47 unconf last 8 AP.tif	6	3	2314.44	100.442	60
47 unconf last 8 AP.tif	6	4	2326.91	100.983	90
47 unconf last 8 AP.tif	6	5	2318.02	100.597	120
47 unconf last 8 AP.tif	6	6	2316.63	100.537	150
47 unconf last 8 AP.tif	6	7	2340.57	101.576	180
47 unconf last 8 AP.tif	6	8	2317.77	100.586	210
70 confined first 20.tif	6	9	2136.14	92.704	240
70 confined first 20.tif	6	10	2139.72	92.8594	270
70 confined first 20.tif	6	11	2122.78	92.1242	300
70 confined first 20.tif	6	12	2132.85	92.5611	330
70 confined first 20.tif	6	13	2130.23	92.4477	360
70 confined first 20.tif	6	14	2146.49	93.1529	390
70 confined first 20.tif	6	15	2140.87	92.9094	420
70 confined first 20.tif	6	16	2116.62	91.8567	450
70 confined first 20.tif	6	17	2127.19	92.3156	480
70 confined first 20.tif	6	18	2135.51	92.6768	510
70 confined first 20.tif	6	19	2123.61	92.1604	540
70 confined first 20.tif	6	20	2138.4	92.8022	570
70 confined first 20.tif	6	21	2134.16	92.6182	600
70 confined first 20.tif	6	22	2142.79	92.9927	630
70 confined first 20.tif	6	23	2137.27	92.7531	660
70 confined first 20.tif	6	24	2138.52	92.8071	690
70 confined first 20.tif	6	25	2126.77	92.2972	720
70 confined first 20.tif	6	26	2127.87	92.3451	750
70 confined first 20.tif	6	27	2118.73	91.9483	780
70 confined first 20.tif	6	28	2129.44	92.413	810
47 unconf last 8 AP.tif	7	1	2433.97	100	0		17.5	8.75	2806.16
47 unconf last 8 AP.tif	7	2	2416.06	99.2642	30
47 unconf last 8 AP.tif	7	3	2431.18	99.8851	60
47 unconf last 8 AP.tif	7	4	2460.37	101.084	90
47 unconf last 8 AP.tif	7	5	2442.62	100.355	120
47 unconf last 8 AP.tif	7	6	2424.26	99.6009	150
47 unconf last 8 AP.tif	7	7	2447.64	100.562	180
47 unconf last 8 AP.tif	7	8	2462.88	101.188	210
70 confined first 20.tif	7	9	2228.89	91.574	240
70 confined first 20.tif	7	10	2225.91	91.4518	270
70 confined first 20.tif	7	11	2207.93	90.7129	300
70 confined first 20.tif	7	12	2223.54	91.3544	330
70 confined first 20.tif	7	13	2239.23	91.9992	360
70 confined first 20.tif	7	14	2234.85	91.8189	390
70 confined first 20.tif	7	15	2215.3	91.0159	420
70 confined first 20.tif	7	16	2227.92	91.5343	450
70 confined first 20.tif	7	17	2238.78	91.9804	480
70 confined first 20.tif	7	18	2240.87	92.0666	510
70 confined first 20.tif	7	19	2232.67	91.7295	540
70 confined first 20.tif	7	20	2227.68	91.5245	570
70 confined first 20.tif	7	21	2223.09	91.3359	600
70 confined first 20.tif	7	22	2228.87	91.5732	630
70 confined first 20.tif	7	23	2228.28	91.5492	660
70 confined first 20.tif	7	24	2239.05	91.9916	690
70 confined first 20.tif	7	25	2235.98	91.8656	720
70 confined first 20.tif	7	26	2228.17	91.5444	750
70 confined first 20.tif	7	27	2222.52	91.3125	780
70 confined first 20.tif	7	28	2224.77	91.405	810
47 unconf last 8 AP.tif	8	1	2629.54	100	0		17.31	8.655	2715.75
47 unconf last 8 AP.tif	8	2	2599.66	98.8634	30
47 unconf last 8 AP.tif	8	3	2613.99	99.4086	60
47 unconf last 8 AP.tif	8	4	2616.91	99.5194	90
47 unconf last 8 AP.tif	8	5	2596.39	98.7394	120
47 unconf last 8 AP.tif	8	6	2593.94	98.6461	150
47 unconf last 8 AP.tif	8	7	2614.62	99.4324	180
47 unconf last 8 AP.tif	8	8	2638.68	100.347	210
70 confined first 20.tif	8	9	2387.48	90.7945	240
70 confined first 20.tif	8	10	2374.33	90.2944	270
70 confined first 20.tif	8	11	2349.58	89.3531	300
70 confined first 20.tif	8	12	2401.87	91.3419	330
70 confined first 20.tif	8	13	2360.99	89.7873	360
70 confined first 20.tif	8	14	2382.17	90.5927	390
70 confined first 20.tif	8	15	2371.03	90.1688	420
70 confined first 20.tif	8	16	2380.8	90.5405	450
70 confined first 20.tif	8	17	2371.71	90.1947	480
70 confined first 20.tif	8	18	2372.66	90.231	510
70 confined first 20.tif	8	19	2388.78	90.8441	540
70 confined first 20.tif	8	20	2380.28	90.5208	570
70 confined first 20.tif	8	21	2375.91	90.3544	600
70 confined first 20.tif	8	22	2378.39	90.4487	630
70 confined first 20.tif	8	23	2383.98	90.6613	660
70 confined first 20.tif	8	24	2391.41	90.9439	690
70 confined first 20.tif	8	25	2380.32	90.5222	720
70 confined first 20.tif	8	26	2391.43	90.9446	750
70 confined first 20.tif	8	27	2382.06	90.5883	780
70 confined first 20.tif	8	28	2389.74	90.8803	810
47 unconf last 8 AP.tif	9	1	2872.35	100	0
47 unconf last 8 AP.tif	9	2	2839.46	98.8549	30
47 unconf last 8 AP.tif	9	3	2834.89	98.6958	60
47 unconf last 8 AP.tif	9	4	2864.17	99.7155	90
47 unconf last 8 AP.tif	9	5	2880.39	100.28	120
47 unconf last 8 AP.tif	9	6	2829.38	98.504	150
47 unconf last 8 AP.tif	9	7	2860.79	99.5976	180
47 unconf last 8 AP.tif	9	8	2873.84	100.052	210
70 confined first 20.tif	9	9	2516.75	87.6198	240
70 confined first 20.tif	9	10	2520.76	87.7597	270
70 confined first 20.tif	9	11	2510.63	87.4069	300
70 confined first 20.tif	9	12	2507.31	87.2915	330
70 confined first 20.tif	9	13	2512.29	87.4646	360
70 confined first 20.tif	9	14	2523.78	87.8647	390
70 confined first 20.tif	9	15	2536.25	88.2987	420
70 confined first 20.tif	9	16	2521.18	87.7742	450
70 confined first 20.tif	9	17	2526.16	87.9477	480
70 confined first 20.tif	9	18	2525.04	87.9085	510
70 confined first 20.tif	9	19	2522.17	87.8088	540
70 confined first 20.tif	9	20	2540.19	88.4362	570
70 confined first 20.tif	9	21	2534.09	88.2236	600
70 confined first 20.tif	9	22	2530.73	88.1067	630
70 confined first 20.tif	9	23	2533.32	88.1968	660
70 confined first 20.tif	9	24	2513.75	87.5156	690
70 confined first 20.tif	9	25	2534.43	88.2355	720
70 confined first 20.tif	9	26	2538.35	88.3719	750
70 confined first 20.tif	9	27	2544.13	88.5731	780
70 confined first 20.tif	9	28	2515.84	87.5883	810
47 unconf last 8 AP.tif	10	1	2397.05	100	0
47 unconf last 8 AP.tif	10	2	2334.91	97.4076	30
47 unconf last 8 AP.tif	10	3	2377.73	99.1941	60
47 unconf last 8 AP.tif	10	4	2403.49	100.269	90
47 unconf last 8 AP.tif	10	5	2383.2	99.4224	120
47 unconf last 8 AP.tif	10	6	2384.49	99.4762	150
47 unconf last 8 AP.tif	10	7	2407.21	100.424	180
47 unconf last 8 AP.tif	10	8	2384.52	99.4773	210
70 confined first 20.tif	10	9	2094.06	87.3597	240
70 confined first 20.tif	10	10	2116.21	88.284	270
70 confined first 20.tif	10	11	2096.04	87.4425	300
70 confined first 20.tif	10	12	2101	87.6494	330
70 confined first 20.tif	10	13	2092.35	87.2885	360
70 confined first 20.tif	10	14	2122.64	88.5524	390
70 confined first 20.tif	10	15	2102.53	87.7132	420
70 confined first 20.tif	10	16	2121.71	88.5135	450
70 confined first 20.tif	10	17	2107.27	87.9111	480
70 confined first 20.tif	10	18	2108.48	87.9614	510
70 confined first 20.tif	10	19	2103.64	87.7596	540
70 confined first 20.tif	10	20	2116.17	88.2824	570
70 confined first 20.tif	10	21	2118.45	88.3772	600
70 confined first 20.tif	10	22	2126.11	88.6968	630
70 confined first 20.tif	10	23	2107.12	87.9047	660
70 confined first 20.tif	10	24	2096.64	87.4676	690
70 confined first 20.tif	10	25	2090.81	87.2245	720
70 confined first 20.tif	10	26	2130.58	88.8835	750
70 confined first 20.tif	10	27	2119.1	88.4047	780
70 confined first 20.tif	10	28	2108.13	87.9471	810
47 unconf last 8 AP.tif	11	1	2996.14	100	0
47 unconf last 8 AP.tif	11	2	2972.92	99.2249	30
47 unconf last 8 AP.tif	11	3	3033.27	101.239	60
47 unconf last 8 AP.tif	11	4	3019.18	100.769	90
47 unconf last 8 AP.tif	11	5	3015.9	100.66	120
47 unconf last 8 AP.tif	11	6	2985.65	99.6499	150
47 unconf last 8 AP.tif	11	7	3003.93	100.26	180
47 unconf last 8 AP.tif	11	8	3002.74	100.22	210
70 confined first 20.tif	11	9	2694.02	89.9165	240
70 confined first 20.tif	11	10	2715.47	90.6322	270
70 confined first 20.tif	11	11	2711.7	90.5066	300
70 confined first 20.tif	11	12	2704.33	90.2606	330
70 confined first 20.tif	11	13	2720.9	90.8137	360
70 confined first 20.tif	11	14	2719.28	90.7595	390
70 confined first 20.tif	11	15	2725.52	90.9679	420
70 confined first 20.tif	11	16	2713.01	90.5501	450
70 confined first 20.tif	11	17	2721.02	90.8177	480
70 confined first 20.tif	11	18	2716.56	90.6689	510
70 confined first 20.tif	11	19	2711.67	90.5054	540
70 confined first 20.tif	11	20	2713.24	90.5581	570
70 confined first 20.tif	11	21	2715.16	90.6219	600
70 confined first 20.tif	11	22	2714.75	90.6083	630
70 confined first 20.tif	11	23	2718.08	90.7196	660
70 confined first 20.tif	11	24	2724.3	90.927	690
70 confined first 20.tif	11	25	2738.39	91.3975	720
70 confined first 20.tif	11	26	2733.43	91.2319	750
70 confined first 20.tif	11	27	2715.95	90.6483	780
70 confined first 20.tif	11	28	2711.14	90.4879	810
47 unconf last 8 AP.tif	12	1	2484.36	100	0
47 unconf last 8 AP.tif	12	2	2495.3	100.44	30
47 unconf last 8 AP.tif	12	3	2471.94	99.4999	60
47 unconf last 8 AP.tif	12	4	2493.14	100.353	90
47 unconf last 8 AP.tif	12	5	2504.68	100.818	120
47 unconf last 8 AP.tif	12	6	2467.87	99.3363	150
47 unconf last 8 AP.tif	12	7	2494.18	100.395	180
47 unconf last 8 AP.tif	12	8	2485.2	100.034	210
70 confined first 20.tif	12	9	2257.15	90.8545	240
70 confined first 20.tif	12	10	2254.25	90.7376	270
70 confined first 20.tif	12	11	2237.5	90.0633	300
70 confined first 20.tif	12	12	2262.34	91.0633	330
70 confined first 20.tif	12	13	2239.41	90.1402	360
70 confined first 20.tif	12	14	2240.92	90.2009	390
70 confined first 20.tif	12	15	2247.53	90.4672	420
70 confined first 20.tif	12	16	2262.36	91.0641	450
70 confined first 20.tif	12	17	2235.08	89.9661	480
70 confined first 20.tif	12	18	2251.53	90.6279	510
70 confined first 20.tif	12	19	2244.37	90.3398	540
70 confined first 20.tif	12	20	2244.49	90.3448	570
70 confined first 20.tif	12	21	2251.26	90.6172	600
70 confined first 20.tif	12	22	2250.86	90.6009	630
70 confined first 20.tif	12	23	2271.18	91.4192	660
70 confined first 20.tif	12	24	2261.78	91.0407	690
70 confined first 20.tif	12	25	2251.22	90.6156	720
70 confined first 20.tif	12	26	2263.32	91.1027	750
70 confined first 20.tif	12	27	2241.67	90.2313	780
70 confined first 20.tif	12	28	2263.72	91.1187	810
47 unconf last 8 AP.tif	13	1	1628.73	100	0
47 unconf last 8 AP.tif	13	2	1640.77	100.739	30
47 unconf last 8 AP.tif	13	3	1639.05	100.634	60
47 unconf last 8 AP.tif	13	4	1639.85	100.683	90
47 unconf last 8 AP.tif	13	5	1652.48	101.458	120
47 unconf last 8 AP.tif	13	6	1627.07	99.8981	150
47 unconf last 8 AP.tif	13	7	1655.1	101.619	180
47 unconf last 8 AP.tif	13	8	1621.97	99.585	210
70 confined first 20.tif	13	9	1473.88	90.4929	240
70 confined first 20.tif	13	10	1472.07	90.3815	270
70 confined first 20.tif	13	11	1448.32	88.9234	300
70 confined first 20.tif	13	12	1479.78	90.8552	330
70 confined first 20.tif	13	13	1483.23	91.0667	360
70 confined first 20.tif	13	14	1472.02	90.3787	390
70 confined first 20.tif	13	15	1461.17	89.7121	420
70 confined first 20.tif	13	16	1472.42	90.4029	450
70 confined first 20.tif	13	17	1458.89	89.572	480
70 confined first 20.tif	13	18	1472.57	90.412	510
70 confined first 20.tif	13	19	1469.59	90.2292	540
70 confined first 20.tif	13	20	1471.05	90.3191	570
70 confined first 20.tif	13	21	1472.95	90.4356	600
70 confined first 20.tif	13	22	1478.73	90.7902	630
70 confined first 20.tif	13	23	1463.8	89.8736	660
70 confined first 20.tif	13	24	1454.86	89.3248	690
70 confined first 20.tif	13	25	1469.52	90.2247	720
70 confined first 20.tif	13	26	1460.98	89.7006	750
70 confined first 20.tif	13	27	1469.67	90.234	780
70 confined first 20.tif	13	28	1471.42	90.3415	810
47 unconf last 8 AP.tif	14	1	2194.22	100	0
47 unconf last 8 AP.tif	14	2	2181.58	99.4239	30
47 unconf last 8 AP.tif	14	3	2176.26	99.1816	60
47 unconf last 8 AP.tif	14	4	2206.11	100.542	90
47 unconf last 8 AP.tif	14	5	2192.65	99.9286	120
47 unconf last 8 AP.tif	14	6	2207.69	100.614	150
47 unconf last 8 AP.tif	14	7	2202.67	100.385	180
47 unconf last 8 AP.tif	14	8	2200.06	100.266	210
70 confined first 20.tif	14	9	1966.32	89.6137	240
70 confined first 20.tif	14	10	1983.46	90.3951	270
70 confined first 20.tif	14	11	1967.47	89.666	300
70 confined first 20.tif	14	12	1980.18	90.2453	330
70 confined first 20.tif	14	13	1991.53	90.7626	360
70 confined first 20.tif	14	14	1993.41	90.8484	390
70 confined first 20.tif	14	15	1998.51	91.0809	420
70 confined first 20.tif	14	16	1984.96	90.4634	450
70 confined first 20.tif	14	17	2000.09	91.1528	480
70 confined first 20.tif	14	18	1997.34	91.0274	510
70 confined first 20.tif	14	19	2012.78	91.7311	540
70 confined first 20.tif	14	20	1988.51	90.6252	570
70 confined first 20.tif	14	21	2003.74	91.319	600
70 confined first 20.tif	14	22	2003.83	91.3232	630
70 confined first 20.tif	14	23	2003.84	91.3237	660
70 confined first 20.tif	14	24	1982.27	90.3405	690
70 confined first 20.tif	14	25	1994.96	90.9191	720
70 confined first 20.tif	14	26	1993.71	90.8621	750
70 confined first 20.tif	14	27	1990.15	90.6997	780
70 confined first 20.tif	14	28	1998.09	91.0614	810
47 unconf last 8 AP.tif	15	1	2751.36	100	0
47 unconf last 8 AP.tif	15	2	2734.04	99.3704	30
47 unconf last 8 AP.tif	15	3	2764.51	100.478	60
47 unconf last 8 AP.tif	15	4	2771.74	100.741	90
47 unconf last 8 AP.tif	15	5	2765.25	100.505	120
47 unconf last 8 AP.tif	15	6	2755.02	100.133	150
47 unconf last 8 AP.tif	15	7	2755.82	100.162	180
47 unconf last 8 AP.tif	15	8	2780.6	101.063	210
70 confined first 20.tif	15	9	2343.24	85.1666	240
70 confined first 20.tif	15	10	2342.39	85.1358	270
70 confined first 20.tif	15	11	2315.17	84.1462	300
70 confined first 20.tif	15	12	2345.83	85.2608	330
70 confined first 20.tif	15	13	2325.17	84.5097	360
70 confined first 20.tif	15	14	2330.08	84.6883	390
70 confined first 20.tif	15	15	2334.72	84.8568	420
70 confined first 20.tif	15	16	2333.24	84.8032	450
70 confined first 20.tif	15	17	2335.02	84.8679	480
70 confined first 20.tif	15	18	2347.29	85.3139	510
70 confined first 20.tif	15	19	2347.11	85.3074	540
70 confined first 20.tif	15	20	2324.17	84.4734	570
70 confined first 20.tif	15	21	2342.67	85.1458	600
70 confined first 20.tif	15	22	2346.39	85.2809	630
70 confined first 20.tif	15	23	2327.5	84.5946	660
70 confined first 20.tif	15	24	2341.85	85.116	690
70 confined first 20.tif	15	25	2332.91	84.7912	720
70 confined first 20.tif	15	26	2346.37	85.2804	750
70 confined first 20.tif	15	27	2323.15	84.4364	780
70 confined first 20.tif	15	28	2323.94	84.465	810
47 unconf last 8 AP.tif	16	1	2955.49	100	0
47 unconf last 8 AP.tif	16	2	2927.62	99.0568	30
47 unconf last 8 AP.tif	16	3	2947.21	99.7197	60
47 unconf last 8 AP.tif	16	4	2946.73	99.7033	90
47 unconf last 8 AP.tif	16	5	2942.68	99.5663	120
47 unconf last 8 AP.tif	16	6	2927.34	99.0474	150
47 unconf last 8 AP.tif	16	7	2936.49	99.3571	180
47 unconf last 8 AP.tif	16	8	2942.4	99.557	210
70 confined first 20.tif	16	9	2520.66	85.2872	240
70 confined first 20.tif	16	10	2526.44	85.4827	270
70 confined first 20.tif	16	11	2526.58	85.4874	300
70 confined first 20.tif	16	12	2575.88	87.1556	330
70 confined first 20.tif	16	13	2574.79	87.1187	360
70 confined first 20.tif	16	14	2555.75	86.4744	390
70 confined first 20.tif	16	15	2545.49	86.1275	420
70 confined first 20.tif	16	16	2582.17	87.3685	450
70 confined first 20.tif	16	17	2581.45	87.3442	480
70 confined first 20.tif	16	18	2577.64	87.2152	510
70 confined first 20.tif	16	19	2583.08	87.3993	540
70 confined first 20.tif	16	20	2567.72	86.8794	570
70 confined first 20.tif	16	21	2560.13	86.6226	600
70 confined first 20.tif	16	22	2552.6	86.368	630
70 confined first 20.tif	16	23	2578.13	87.2318	660
70 confined first 20.tif	16	24	2548.47	86.2281	690
70 confined first 20.tif	16	25	2574.55	87.1107	720
70 confined first 20.tif	16	26	2584.23	87.4383	750
70 confined first 20.tif	16	27	2584.04	87.4317	780
70 confined first 20.tif	16	28	2557.9	86.5472	810
47 unconf last 8 AP.tif	17	1	1577.99	100	0
47 unconf last 8 AP.tif	17	2	1560.64	98.9008	30
47 unconf last 8 AP.tif	17	3	1552.33	98.3741	60
47 unconf last 8 AP.tif	17	4	1538.31	97.4857	90
47 unconf last 8 AP.tif	17	5	1529.51	96.9278	120
47 unconf last 8 AP.tif	17	6	1581.18	100.202	150
47 unconf last 8 AP.tif	17	7	1569.87	99.4857	180
47 unconf last 8 AP.tif	17	8	1558.11	98.7406	210
70 confined first 20.tif	17	9	1351.42	85.642	240
70 confined first 20.tif	17	10	1370.33	86.8403	270
70 confined first 20.tif	17	11	1375.52	87.1694	300
70 confined first 20.tif	17	12	1364.08	86.4446	330
70 confined first 20.tif	17	13	1353.79	85.792	360
70 confined first 20.tif	17	14	1363.71	86.4208	390
70 confined first 20.tif	17	15	1367.19	86.6413	420
70 confined first 20.tif	17	16	1352.26	85.6955	450
70 confined first 20.tif	17	17	1372.81	86.9975	480
70 confined first 20.tif	17	18	1361.04	86.2521	510
70 confined first 20.tif	17	19	1373.73	87.0562	540
70 confined first 20.tif	17	20	1361.2	86.2619	570
70 confined first 20.tif	17	21	1371.49	86.9141	600
70 confined first 20.tif	17	22	1357.73	86.0423	630
70 confined first 20.tif	17	23	1367.25	86.6456	660
70 confined first 20.tif	17	24	1369.39	86.7807	690
70 confined first 20.tif	17	25	1365.36	86.5254	720
70 confined first 20.tif	17	26	1363.29	86.3943	750
70 confined first 20.tif	17	27	1364.87	86.4942	780
70 confined first 20.tif	17	28	1380.1	87.4594	810
47 unconf last 8 AP.tif	18	1	2160.72	100	0
47 unconf last 8 AP.tif	18	2	2168.81	100.374	30
47 unconf last 8 AP.tif	18	3	2158.37	99.8912	60
47 unconf last 8 AP.tif	18	4	2169.95	100.427	90
47 unconf last 8 AP.tif	18	5	2188.71	101.295	120
47 unconf last 8 AP.tif	18	6	2191.04	101.403	150
47 unconf last 8 AP.tif	18	7	2165.69	100.23	180
47 unconf last 8 AP.tif	18	8	2143.16	99.1871	210
70 confined first 20.tif	18	9	2019.24	93.4519	240
70 confined first 20.tif	18	10	2024.06	93.675	270
70 confined first 20.tif	18	11	2002	92.6543	300
70 confined first 20.tif	18	12	2029.34	93.9193	330
70 confined first 20.tif	18	13	2037.48	94.2961	360
70 confined first 20.tif	18	14	2018.79	93.4313	390
70 confined first 20.tif	18	15	2010.89	93.0658	420
70 confined first 20.tif	18	16	2024.84	93.7111	450
70 confined first 20.tif	18	17	2051.56	94.9477	480
70 confined first 20.tif	18	18	2028.01	93.8578	510
70 confined first 20.tif	18	19	2026.76	93.8001	540
70 confined first 20.tif	18	20	2025.96	93.7632	570
70 confined first 20.tif	18	21	2033.1	94.0937	600
70 confined first 20.tif	18	22	2015.23	93.2667	630
70 confined first 20.tif	18	23	2041.57	94.4855	660
70 confined first 20.tif	18	24	2036.78	94.2639	690
70 confined first 20.tif	18	25	2042.92	94.548	720
70 confined first 20.tif	18	26	2032.42	94.0619	750
70 confined first 20.tif	18	27	2036.2	94.2371	780
70 confined first 20.tif	18	28	2027.95	93.8553	810
47 unconf last 8 AP.tif	19	1	1625.74	100	0
47 unconf last 8 AP.tif	19	2	1650.41	101.517	30
47 unconf last 8 AP.tif	19	3	1793.58	110.324	60
47 unconf last 8 AP.tif	19	4	1634.39	100.532	90
47 unconf last 8 AP.tif	19	5	1627.46	100.106	120
47 unconf last 8 AP.tif	19	6	1659.84	102.097	150
47 unconf last 8 AP.tif	19	7	1676.39	103.115	180
47 unconf last 8 AP.tif	19	8	1632.63	100.424	210
70 confined first 20.tif	19	9	1576.04	96.9429	240
70 confined first 20.tif	19	10	1562.95	96.1376	270
70 confined first 20.tif	19	11	1575.17	96.8896	300
70 confined first 20.tif	19	12	1570.68	96.613	330
70 confined first 20.tif	19	13	1576.07	96.945	360
70 confined first 20.tif	19	14	1565.86	96.3167	390
70 confined first 20.tif	19	15	1566.6	96.3625	420
70 confined first 20.tif	19	16	1572.12	96.702	450
70 confined first 20.tif	19	17	1559.53	95.9276	480
70 confined first 20.tif	19	18	1589.85	97.7922	510
70 confined first 20.tif	19	19	1564.84	96.2539	540
70 confined first 20.tif	19	20	1579.69	97.1677	570
70 confined first 20.tif	19	21	1560.68	95.9983	600
70 confined first 20.tif	19	22	1574.7	96.8607	630
70 confined first 20.tif	19	23	1564.24	96.217	660
70 confined first 20.tif	19	24	1584.52	97.4648	690
70 confined first 20.tif	19	25	1587.47	97.646	720
70 confined first 20.tif	19	26	1565.76	96.3103	750
70 confined first 20.tif	19	27	1583.89	97.426	780
70 confined first 20.tif	19	28	1567.55	96.4204	810

## Sheet: Sheet3
		Vi			Vf		deltaV	delta V%
1	1	2765.42	1	9	2454.22	88.7465	311.208	11.2535
2	1	1858.5	2	9	1721.32	92.619	137.176	7.38102
3	1	2643.04	3	9	2424.17	91.7188	218.876	8.28121
4	1	2116.64	4	9	2089.47	98.7163	27.1718	1.28372
5	1	2185.03	5	9	2045.72	93.6247	139.302	6.3753
6	1	2304.26	6	9	2136.14	92.704	168.119	7.29601
7	1	2433.97	7	9	2228.89	91.574	205.086	8.42598
8	1	2629.54	8	9	2387.48	90.7945	242.064	9.20554
9	1	2872.35	9	9	2516.75	87.6198	355.601	12.3802
10	1	2397.05	10	9	2094.06	87.3597	302.994	12.6403
11	1	2996.14	11	9	2694.02	89.9165	302.115	10.0835
12	1	2484.36	12	9	2257.15	90.8545	227.208	9.14551
13	1	1628.73	13	9	1473.88	90.4929	154.844	9.50707
14	1	2194.22	14	9	1966.32	89.6137	227.899	10.3863
15	1	2751.36	15	9	2343.24	85.1666	408.119	14.8334
16	1	2955.49	16	9	2520.66	85.2872	434.835	14.7128
17	1	1577.99	17	9	1351.42	85.642	226.567	14.358
18	1	2160.72	18	9	2019.24	93.4519	141.485	6.54806
19	1	1625.74	19	9	1576.04	96.9429	49.7011	3.05713

## Sheet: int
frame	intensity (a.u.)
47 unconf last 8.tif	1705.12
47 unconf last 8.tif	1706.55
47 unconf last 8.tif	1705.19
47 unconf last 8.tif	1694.51
47 unconf last 8.tif	1701.6
47 unconf last 8.tif	1702.02
47 unconf last 8.tif	1703.95
47 unconf last 8.tif	1693.03
70 confined first 20.tif	987.6
70 confined first 20.tif	980.986
70 confined first 20.tif	986.303
70 confined first 20.tif	979.667
70 confined first 20.tif	977.298
70 confined first 20.tif	978.388
70 confined first 20.tif	976.189
70 confined first 20.tif	980.667
70 confined first 20.tif	975.965
70 confined first 20.tif	973.584
70 confined first 20.tif	978.622
70 confined first 20.tif	972.941
70 confined first 20.tif	971.944
70 confined first 20.tif	976.094
70 confined first 20.tif	969.978
70 confined first 20.tif	969.539
70 confined first 20.tif	973.564
70 confined first 20.tif	969.409
70 confined first 20.tif	967.335
70 confined first 20.tif	965.795
