# Supplementary material for: A mechano-osmotic feedback couples cell volume to the rate of cell deformation
Source: eLife journal article supplement (doi:10.7554/elife.72381), 2022-04-13
Supplement: supp [file V_A_indcell_example.xlsx]

## Sheet: Sheet1
Frame	volume (µm3)	area (µm2)		t (min)
1	1516.14	23.401		0
2	1471.72	61.052		1
3	1424.21	83.205		2
4	1386.63	112.431		3
5	1339.43	164.642		4
6	1307.17	168.594		5
7	1275	192.62		6
8	1255.83	196.156		7
9	1244.58	208.845		8
10	1224.5	230.998		9
11	1209.79	261.056		10
12	1189.59	266.776		11
13	1168.55	285.081		12
14	1161.9	285.913		13
15	1161.88	289.969		14
16	1157.56	329.18		15
17	1149.64	315.555		16
18	1145.52	326.06		17
19	1146.5	332.82		18
20	1146.84	332.508		19
21	1140.81	328.14		20
22	1148.77	332.196		21
23	1146.86	334.068		22
24	1152.61	355.805		23
25	1149.47	331.26		24
26	1148.46	329.804		25
27	1159.03	363.086		26
28	1161.92	346.757		27
29	1170.13	350.605		28
30	1170.21	377.647		29
31	1175.95	375.671		30
32	1180.45	350.189		31
33	1189.09	356.637		32
34	1189.19	342.285		33
35	1201.42	368.494		34
36	1204.51	352.269		35
37	1211.17	339.268		36
38	1222.14	359.966		37
39	1228.51	352.893		38
40	1227.36	360.278		39
41	1230.39	344.365		40
42	1239.63	360.694		41
43	1249.4	357.573		42
44	1257.79	360.486		43
45	1264.76	356.325		44
46	1259.9	365.374		45
47	1269.43	364.542		46
48	1276.99	349.773		47
49	1288.3	372.03		48
50	1291.05	361.942		49
51	1303.66	348.109		50
52	1304.59	346.445		51
53	1306.07	334.588		52
54	1314.78	341.245		53
55	1313.73	326.476		54
56	1313.21	331.468		55
57	1323.64	330.012		56
58	1323.35	333.028		57
59	1326.29	333.028		58
60	1339.16	342.389		59
61	1329.01	334.692		60
