# Supplementary material for: A mechano-osmotic feedback couples cell volume to the rate of cell deformation
Source: eLife journal article supplement (doi:10.7554/elife.72381), 2022-04-13
Supplement: supp [file V_exp_data.xlsx]

## Sheet: control 20180308
	-1.9979	-15.4534	-2.20672	-0.151027	-6.40884	-24.109	3.99286	-4.22098	-16.1216	-19.6499	-6.45555	-1.83497	-12.0141	-15.4464	-8.04897	0.672366	-1.08594	-17.4232	0.425905	-10.0591	-2.30904	-11.7844	-3.83483	-6.10587	-11.6351	-1.93821	-4.60061	-19.009	-0.843784	-1.23661	-23.0352	-16.8356	-0.815073	-3.15748	-24.2082	2.85822	-4.42119	11.4382	5.9357	7.5775	0.104426	-3.65751	-9.2083	-6.51237	-19.6272	-8.92505	-3.12498	-3.36789	-1.1543
	4	4	4	4	4	4	4	4	4	4	5	5	5	5	5	5	5	5	5	5	5	5	6	6	6	6	6	6	6	6	6	6	6	6	7	7	7	7	7	7	7	7	7	7	8	8	8	8	8
	1	2	3	4	5	6	7	8	9	12	1	2	4	5	7	6	8	9	10	11	12	13	1	2	3	4	5	6	7	8	9	10	11	12	1	2	5	6	7	11	12	13	14	15	1	2	3	4	5
0	1946.43	2165.8	2523.85	1671.55	2008.32	3521.94	2242.96	1465.72	1489.46	2153.14	1527.44	1390.41	2287.87	2034.93	2626.51	1867.27	1218.55	1594.03	2323.11	1525.04	1602.04	2074.81	1647.86	2518.59	1982.7	1516.06	1147.19	2071.09	1159.62	1490.27	3195.67	2197.61	1664.82	1481.93	2172.12	1050.86	2455.18	1866.26	2231.74	2143.7	1224.12	1204.48	1936.07	2541.8	2429.17	1555.87	1903.85	1319.18	2211.88
1	1934.36	2130.01	2522.29	1675.61	1986.5	3478.62	2219.49	1446.74	1480.18	2113.58	1516.88	1367.02	2246.21	2009.51	2599.08	1855.57	1205.59	1558.85	2309.96	1516.16	1595.06	2070.49	1639.63	2516.03	1971.65	1516.34	1151.92	2034.34	1157.76	1490.88	3151.88	2187.05	1664.52	1487.38	2145.91	1041.94	2424.69	1873.32	2226	2155.32	1220.73	1195.26	1926.89	2532.35	2423.06	1553.84	1898.59	1317.28	2217.82
2	1920.62	2118.45	2525.58	1672.09	1984.5	3455.26	2215.8	1433.6	1466.1	2092.68	1504.55	1385.49	2225.77	1996.88	2591.54	1851.02	1214.5	1527.19	2302.34	1492.13	1604.13	2047.9	1634.96	2528	1946.01	1508.7	1157.59	1999.68	1145.76	1480.46	3102.83	2153.97	1656.98	1488.96	2121.28	1053.46	2417.29	1895.63	2241.53	2163.77	1231.1	1195.41	1915.64	2541.44	2419.49	1544.81	1893.41	1319.78	2217.98
3	1911.93	2096.45	2522.41	1672.5	1964.32	3420.13	2224.28	1422.76	1446.84	2075.08	1519.95	1380.11	2200.28	1983.49	2585.75	1850.71	1219.27	1504.27	2300.71	1475.5	1597.1	2030.13	1647.11	2526.08	1936.81	1511.23	1148.33	1969.94	1148.27	1474.58	3073	2134.27	1666.63	1502.57	2076.07	1055.45	2394.82	1906.8	2244.34	2178.18	1237.1	1175.81	1883.84	2546.72	2407.55	1528.97	1893.31	1312.65	2210.86
4	1935	2079.03	2517.75	1678.88	1954.59	3382.19	2217.99	1420.16	1441.77	2036.12	1508.53	1373.13	2167.14	1959.32	2564.56	1856.62	1201.99	1471.42	2302.29	1467.54	1591.67	2015.9	1631.87	2521.6	1926.57	1506.89	1148.53	1957.53	1154.87	1479.1	3053.31	2102.81	1652.21	1489.81	2052.31	1057.38	2404.5	1919.21	2264.63	2171.03	1227.65	1176.36	1879.67	2532.89	2379.13	1522.12	1888.36	1309.38	2223.13
5	1909.1	2060.68	2514.14	1672.56	1951.38	3351.1	2213.78	1417.33	1420.55	2013.72	1501.44	1375.01	2166.21	1942.56	2571.95	1852.41	1210.53	1461.68	2300.03	1456.02	1598.27	2009.1	1631.34	2509.56	1914.3	1507.1	1142.24	1935.93	1141.48	1482.87	3034.92	2091.35	1647.42	1494.18	2026.02	1063.4	2383.25	1940.86	2278.5	2182.07	1230.09	1180.38	1871.72	2514.31	2355.52	1501.59	1888.25	1311.95	2225.09
6	1913.98	2050.67	2508.03	1675.84	1938.47	3333.94	2196.57	1415.64	1406.06	2005.6	1485.73	1367.87	2155.28	1926.65	2555.12	1856.17	1207.47	1446.4	2299.56	1457.77	1592.82	1992.11	1635.5	2506.95	1891.25	1505.48	1131.05	1922.19	1150.55	1479.48	3008.71	2076.77	1663.54	1486.07	2007.75	1074.97	2397.44	1947.5	2272.39	2187.85	1229.72	1177.79	1865.19	2515.58	2341.94	1498.95	1886.54	1303.82	2217.02
7	1919.42	2030.48	2508.37	1665.18	1938.75	3319	2256.95	1416.6	1382.73	1992.17	1477.39	1370.96	2155.72	1915.69	2550.05	1852.08	1210.68	1430.99	2312.68	1436.22	1588.13	1987.98	1622.98	2490.66	1894.17	1500.6	1137.6	1902.87	1155.36	1480.95	3002.04	2058.71	1659.72	1481.09	1974.52	1066.07	2402.27	1946.42	2276.13	2195.26	1232.48	1171.98	1865.77	2515.63	2308.53	1489.55	1883.47	1300.48	2222.23
8	1923.88	2031.09	2514.88	1671.82	1949.19	3305.78	2283.09	1416.51	1360.56	1982.76	1471.06	1367.95	2152.82	1901.87	2551.12	1863.04	1213.29	1425.86	2307.84	1438.81	1583.77	1980.83	1607.6	2488.38	1874.12	1495.64	1122.26	1891.85	1135.57	1480.61	2980.58	2056.66	1659.59	1477.26	1970.37	1071.43	2407.41	1965.68	2280.75	2208.67	1229.23	1171.64	1854.65	2495.31	2279.24	1482.05	1870.84	1300.17	2209.08
9	1914.33	2017.5	2505.53	1672.23	1936.14	3292.42	2251.28	1414.98	1344.09	1958.14	1476.36	1367.19	2153.55	1890.72	2536.96	1864.76	1202.89	1422.47	2313.15	1427.15	1582.81	1970.51	1615.59	2470.04	1876.94	1498.73	1120.4	1877.78	1148.53	1473.27	2966.6	2041.26	1660.13	1458.85	1950.45	1067.95	2392.76	1960.69	2280.06	2219.06	1222.16	1161.62	1851.9	2488.46	2261.26	1476.62	1870.93	1292.36	2204.05
10	1917.75	2000.31	2502.69	1674.63	1942.25	3280.29	2256.2	1411.88	1339.77	1950.41	1459.52	1365.14	2161.67	1880.8	2539.54	1867.04	1199.89	1414.93	2322.39	1424.61	1576.61	1957.4	1608.07	2461.92	1869.76	1499.87	1100.18	1876.74	1152.59	1474.44	2947.77	2037.68	1649.33	1451.64	1935.98	1074.38	2387.82	1984.47	2281.28	2222.28	1227.83	1166.45	1840.2	2477.21	2258	1479.36	1875.07	1282.78	2199.52
11	1912.46	1991.35	2520.1	1665.49	1928.19	3281.92	2278.56	1419.46	1335.68	1941.26	1459.16	1360.92	2147.58	1849.2	2533.24	1880.76	1210.66	1401.53	2316.78	1425.64	1584.14	1952.72	1597.09	2439.89	1870.22	1495.26	1099.9	1869.12	1147.58	1467.01	2946.11	2024.17	1647.34	1464.94	1927.58	1082.58	2388.93	1993.02	2288.42	2228.16	1217.85	1165.62	1825.78	2461.71	2236.46	1472.95	1868.39	1278.31	2185.1
12	1917.92	1988.55	2515.32	1658.42	1928.08	3289.34	2253.52	1423.26	1332.51	1923.39	1454.75	1363.36	2152.21	1837.94	2538.63	1876.1	1208.52	1399.81	2315.96	1426.01	1579.44	1938.98	1596.87	2438.69	1860.54	1491.08	1090.97	1876.32	1140.25	1479.84	2960.55	2051.3	1654.17	1452.64	1927.19	1088.91	2386.88	1995.02	2253.35	2232.57	1208.98	1161.1	1817.84	2458.96	2220.26	1475.81	1871.27	1275.85	2192.02
13	1905.41	1972.71	2517.27	1666	1908.54	3298.29	2274.68	1420.38	1321.54	1919.74	1437.39	1356.98	2149.52	1829.42	2542.09	1873.5	1200.83	1392.75	2309.02	1425.45	1564.89	1916.84	1591.77	2434.39	1863.49	1490.34	1092.12	1869.92	1140.25	1478.69	2947.83	2015.73	1645.52	1441.1	1907.17	1081.39	2393.93	2005.41	2251.15	2255.23	1201.37	1156.63	1826.87	2432.35	2231.77	1462.23	1870.88	1267.8	2173.93
14	1904.62	1972.56	2521.03	1670.9	1919.29	3297.61	2267.07	1417.13	1319.36	1900.93	1433.76	1348.53	2143.65	1835.16	2532.9	1875.99	1215.66	1366.47	2318.18	1422.41	1563.51	1907.51	1599.87	2429.9	1862.54	1490.1	1085.6	1865.01	1152.16	1487.94	2938.95	2019.31	1638.75	1443.88	1912.05	1087.09	2381.88	2003.14	2232.99	2264.19	1187.77	1150.86	1820.53	2426.79	2225.06	1459.93	1869.93	1256.06	2175.99
15	1897.54	1959.26	2527.6	1656.08	1907.99	3310.99	2263.93	1424.93	1333.28	1892.72	1431.39	1343.66	2140.65	1826.04	2529.07	1882.96	1217.12	1365.31	2329.88	1421.64	1557.63	1898.77	1596.47	2419.55	1839.34	1490.18	1087.76	1850.94	1143.21	1490.13	2939.55	2010.92	1624.87	1433.89	1925.39	1090.92	2375.51	2024.77	2221.75	2254.14	1180.54	1150.46	1816.5	2415.91	2228.38	1455.91	1869.97	1259.4	2168.25
16	1900.63	1951.1	2516.53	1668.49	1916.71	3320.74	2254.58	1414.99	1317.47	1873.42	1433.77	1330.92	2132.73	1807.48	2536.11	1880.32	1210.02	1355.5	2322.25	1422.82	1558.21	1892.04	1604.53	2416.89	1860.14	1491.15	1086.66	1852.85	1129.94	1497.78	2957.53	2008.5	1613.22	1426.95	1914.87	1089.38	2377.02	2036.2	2221.55	2259.92	1171.28	1137.8	1815.73	2388.58	2233.72	1443.92	1860.74	1247.77	2151.06
17	1899.41	1947.5	2517.22	1658.46	1909.53	3325.54	2257.99	1419.62	1328.17	1870.36	1419.84	1321.84	2128.36	1807.9	2531.2	1886.31	1218.29	1338.56	2329.98	1426.6	1561.64	1880.26	1604.33	2404.65	1837.78	1487.43	1078.44	1843.39	1133.05	1497.61	2943.62	2027.62	1612	1422.35	1928.05	1089.58	2366.15	2043.49	2218.54	2263.9	1169.07	1134.38	1804.27	2391.48	2239.23	1442.29	1865.95	1234.74	2150.44
18	1885.34	1937.61	2514.3	1661.43	1894.75	3343.21	2256.39	1416.67	1324.38	1857.83	1416.13	1321.6	2122.7	1797.91	2535.95	1881.87	1218.56	1336.66	2321.99	1423.98	1565.71	1871.06	1607.06	2394.96	1833.67	1484.86	1077.4	1844.65	1140.3	1500.84	2937.22	1974.21	1603.99	1430.68	1918.13	1092	2370.94	2044.89	2210.58	2273.46	1166.25	1129.35	1806.75	2379.73	2246.56	1431.65	1859.41	1226.6	2149.55
19	1886.75	1925.02	2513.68	1665.57	1877.59	3339.67	2251.81	1416.16	1322.08	1860.9	1410.89	1323.74	2116.36	1791.46	2543.14	1903.96	1220.5	1330.63	2312.94	1426.17	1561.61	1873.9	1601.52	2392.92	1827.59	1478.97	1073.46	1836.22	1148.16	1500.9	2940.93	2010.54	1600.59	1419.99	1914.5	1092.85	2364.23	2063.81	2198.73	2266.06	1155.99	1120.36	1807.95	2366.56	2257.52	1426.62	1872.2	1233.12	2144.19
20	1875.66	1911.34	2510.53	1655.43	1870.49	3352.77	2242.69	1410.46	1315.57	1850.78	1395.19	1323.39	2101.67	1784.13	2511.37	1892.13	1221.64	1316.32	2303.6	1436.46	1574.49	1854.04	1611.12	2398.94	1814.75	1480.46	1069.54	1821.47	1143.77	1511.65	2928.06	2041.89	1601.67	1418.37	1924.14	1091.02	2355.88	2061.49	2195.98	2274.63	1150.05	1123.16	1813.54	2362.33	2255.43	1422.15	1864.77	1228.05	2159.4
21	1869.8	1918.91	2514.57	1664.97	1868.55	3369.78	2248.6	1414.13	1316.37	1850.87	1406.52	1337.19	2114.67	1794.7	2520.17	1894.27	1234.5	1325.5	2311.54	1440.97	1580.7	1865.63	1618.26	2396.59	1815.92	1480.77	1077.17	1830.38	1137.67	1502.02	2927.78	1994.93	1595.85	1404.6	1923.32	1088.9	2347.8	2066.06	2187.67	2265.29	1152.21	1116.42	1813.31	2358.93	2259.21	1431.45	1865.02	1222.19	2171.49
22	1857.26	1921.76	2517.44	1679.1	1870.07	3367.43	2236.85	1410.82	1321.92	1836.47	1406.16	1316.99	2113.95	1777.76	2523.05	1913.69	1226.58	1317.97	2301.04	1439.24	1583.69	1861.26	1620.34	2407.28	1808.59	1473.8	1069.41	1827.04	1139.41	1510.82	2912	1992.61	1591.15	1398.42	1927.97	1092.82	2349.89	2065.54	2187.05	2273.98	1148.43	1123.76	1812.62	2347.1	2276.1	1417.92	1862.12	1218.74	2193.88
23	1862.16	1923.2	2526.13	1690.32	1854.97	3377.85	2224.57	1412.42	1320.75	1847.6	1389.03	1319.16	2127.16	1770.97	2514.36	1906.2	1228.15	1311.64	2303.76	1447.36	1584.42	1864.59	1633.56	2387.56	1800.08	1466.9	1071.85	1820.74	1135.03	1507.78	2910.06	1993.28	1588.48	1398.99	1920.53	1086.67	2337.66	2072.3	2185.47	2278.81	1146.62	1124.34	1823.09	2337.26	2285.05	1420.9	1854.11	1213.64	2192.44
24	1868.07	1917.14	2533.56	1698.55	1856.5	3391.79	2215.73	1415.28	1318.43	1850.71	1396.15	1318.79	2137.36	1780.64	2508.01	1912.05	1238.2	1306.26	2297.44	1441.47	1593.01	1860.69	1638.98	2397.62	1804.75	1476.47	1077.1	1821.97	1136.03	1508.71	2906.61	2000.49	1590.91	1398.9	1932.92	1096.53	2342.19	2077.77	2175.84	2272.36	1154.25	1109.41	1820.42	2351.84	2276.39	1411.74	1854.41	1222.64	2201.7
25	1859.43	1925.18	2548.58	1711.16	1848.63	3400.49	2216.64	1410.77	1330.05	1831.09	1380.03	1315.12	2142.54	1769.53	2495.73	1914.07	1244.06	1314.18	2299.38	1444.85	1595.78	1865.36	1637	2400.86	1799.82	1458.36	1070.81	1829.62	1124.76	1502.41	2891.04	2024.62	1582.72	1390	1939.47	1104.69	2332.46	2091.02	2172.07	2275.4	1151.74	1107.29	1817.92	2356.28	2289.44	1410.03	1850.76	1216.56	2172.24
26	1848.17	1907.93	2534.37	1720.03	1835.33	3395.46	2204.7	1409.27	1331.64	1843.67	1378.18	1316.59	2147.91	1771	2493.74	1920.86	1243.54	1308.53	2304.8	1445.47	1601.68	1862.75	1637.32	2417.9	1791.18	1468.67	1080.81	1827.68	1135.52	1512.39	2883.83	2037.39	1581.76	1385.83	1937.74	1108.99	2334.5	2089.32	2172.71	2279.33	1156.81	1096.7	1805.78	2345.65	2316.17	1404.01	1846.31	1217.9	2191.25
27	1851.06	1895.88	2546.01	1742.59	1825.45	3401.58	2201.99	1421.22	1341.92	1828.24	1380.65	1328.29	2155.38	1770.16	2499.26	1927.1	1244.32	1316.05	2312.37	1457.51	1604.95	1860.54	1645.74	2420.82	1791.16	1470.01	1068.31	1841.24	1135.18	1499.2	2881.83	2044.86	1584.87	1385.96	1934.48	1090.25	2324.21	2092.36	2178.87	2293.48	1162.58	1099.66	1802.38	2358.11	2306.21	1403.74	1851.9	1214.6	2173.58
28	1835.65	1897.34	2556.45	1738.45	1819.88	3412.71	2204.96	1423.09	1348.08	1839.83	1368.3	1326.1	2159.49	1788.83	2482	1930.52	1252.64	1317	2321.64	1450.86	1601.22	1860.2	1662.23	2397.65	1776.26	1451.45	1074.39	1851.97	1105.98	1504.71	2864.03	2028.94	1572.1	1366.31	1945.49	1093.63	2313.65	2097.57	2172.81	2296.97	1160.05	1089.2	1800.15	2362.07	2313.55	1402.03	1840.98	1212.05	2169.63
29	1826.99	1892.23	2552.63	1761.32	1820.28	3405.82	2200.19	1415.05	1343.9	1831.74	1353.99	1320.07	2164.11	1773.84	2478.93	1933.15	1256.7	1311.1	2322.2	1455.45	1603.47	1867.28	1644	2415.38	1780.78	1484.06	1066.58	1848.95	1118.09	1510.87	2857.91	2048.23	1578.31	1382.09	1939.99	1082.75	2311.39	2094.98	2168.35	2296.55	1165.83	1097.17	1793.74	2361.06	2301.57	1394.16	1840.39	1213.36	2183.93
30	1824.07	1886.88	2566.83	1772.32	1828.96	3404.1	2194.53	1423.55	1357.75	1831.48	1357.21	1324.4	2167.1	1778.87	2466.63	1943.98	1257.91	1322.87	2326.47	1464.06	1614.47	1861.16	1645.85	2437.11	1772.8	1478.5	1065.62	1839.34	1119.47	1489.27	2868.68	2050.35	1581.93	1374.75	1945.35	1102.82	2306.45	2083.21	2165.52	2295.97	1170.85	1101.48	1802	2354.14	2315.4	1389.67	1838.47	1216.1	2182.87
31	1825.43	1888.65	2571.41	1788.03	1820.44	3413.83	2189.88	1420.33	1356.34	1839.47	1347.65	1333.93	2164.96	1791.89	2455.57	1935.85	1260.39	1316.45	2331.91	1463.28	1625.62	1857.88	1667.17	2437.99	1767.92	1483.97	1060.3	1831.2	1123.27	1497.17	2864.36	2055.07	1584.6	1375.84	1943.34	1099.71	2292.14	2085.78	2164.98	2282.21	1167.66	1093.17	1808.85	2375.16	2313.78	1393.02	1824.06	1222.58	2180.24
32	1818.28	1888.33	2568.65	1804.34	1815.26	3424.44	2183.77	1419.53	1370.6	1841.16	1339.58	1328.66	2174.21	1797.94	2446.37	1945.08	1256.64	1318.31	2340.2	1472.35	1619.12	1860.26	1656.56	2432.02	1762.25	1477.24	1070.21	1830.1	1111.55	1498.73	2861.88	2018.54	1570.01	1360.74	1945.84	1105.01	2290.4	2082.31	2164.82	2296.75	1182.27	1095.65	1805.56	2370.48	2311.93	1389.87	1814.19	1224.51	2185.06
33	1821.07	1884.5	2582.98	1818.46	1812.83	3421.66	2187.52	1421.47	1374.97	1847.01	1349.41	1332.92	2198.19	1811.08	2447.41	1941.71	1271.16	1333.58	2338.52	1476.24	1628.63	1864.77	1659.91	2442.67	1766.77	1488.2	1074.95	1842.83	1111.53	1489.43	2866.3	2018.17	1583.9	1355.08	1959.83	1112.57	2281.06	2084.08	2164.33	2303.71	1190.63	1101.55	1806.06	2362.43	2314.59	1389.7	1814.81	1215.06	2181.94
34	1815.72	1885.83	2577.88	1832.17	1814.72	3431.1	2185.89	1420.96	1385.72	1835.64	1345.79	1331.93	2187.38	1807.49	2444.47	1953.76	1262.62	1319.66	2340.06	1476.74	1625.77	1865.22	1661.3	2450.55	1760.97	1486.49	1074.69	1854.29	1111.07	1500.52	2862.94	2062.11	1580.32	1347.67	1958.74	1102.02	2270.75	2071.83	2162.45	2300.5	1188.18	1088.53	1804.74	2385.92	2316.76	1393.98	1811.33	1216.2	2189.02
35	1816.01	1887.15	2584.84	1849.78	1817.83	3439.66	2178.29	1431.14	1387.56	1845.21	1336.54	1332.43	2207.39	1822.46	2445.64	1967.95	1262.32	1332.12	2338.31	1476.72	1633.74	1859.5	1665.96	2452.32	1766.65	1499.4	1073.56	1856.38	1111.02	1503.26	2852	2061.92	1589.58	1344.45	1940.98	1095.98	2271.21	2080.31	2170.51	2302.12	1195.63	1111.4	1805.58	2386.41	2324.46	1385.71	1811.07	1225.61	2183.33
36	1802.97	1880.05	2609.09	1856.46	1817.2	3438.62	2184.17	1417.14	1396.96	1860.29	1326.36	1337.72	2215.9	1806.7	2434.84	1963.78	1261.5	1325.67	2350.24	1479.21	1641.77	1870.9	1671.24	2445.31	1756.77	1499.73	1071.82	1854.78	1106.79	1506.39	2845.14	2061.08	1584.37	1344.39	1962.04	1104.75	2258.51	2080.3	2157.43	2298.84	1201.32	1105.97	1824.44	2380.82	2330.61	1380.96	1796.4	1215.37	2181.51
37	1798.27	1882.93	2601.59	1877.45	1815.4	3428.86	2183.7	1413.95	1395.72	1854.6	1321.78	1337.93	2220.66	1814.07	2443.22	1970.94	1263.3	1329.49	2356.06	1485.34	1639.8	1878.28	1678.67	2456.05	1753.98	1507.13	1078.72	1866.42	1107.81	1491.15	2843.02	2064.36	1594.77	1341.36	1955.92	1100.63	2255.19	2086.78	2153.59	2302.77	1212.91	1100.94	1823.51	2389.02	2328.05	1399.53	1787	1217.15	2184.86
38	1797.71	1870.63	2602.21	1881.4	1807.44	3435.7	2171.07	1417.99	1397.12	1852.02	1319.57	1343.83	2221.42	1833.73	2445.68	1983.76	1258.93	1336.85	2358.11	1490.07	1626.2	1869.98	1674.68	2456.99	1750.36	1530.18	1085.28	1885.99	1105.72	1500.86	2836.66	2066.89	1595.7	1348.25	1951	1091.77	2248.69	2082.12	2155.65	2305.12	1225.48	1108.18	1838.79	2391.53	2329.51	1391.16	1793.01	1219.48	2192.94
39	1800.46	1872.29	2613.26	1898.01	1818.92	3427.08	2163.61	1404.29	1407.29	1872.68	1317.17	1334.13	2238.63	1838.74	2445.39	1986.76	1270.59	1338.13	2359.32	1488.79	1616.69	1873.62	1682.68	2460.84	1743.67	1528.18	1083.31	1875.61	1110.27	1499.45	2840.34	2043.65	1597.34	1343.24	1962.52	1087.67	2242.96	2079.32	2161	2294.06	1217.75	1115.5	1844.31	2405.08	2334.5	1401.42	1794.05	1216.96	2186.05
40	1803.32	1871.39	2603	1904.95	1820.81	3436.52	2168.56	1401.69	1414.68	1867.09	1308.13	1345.32	2236.62	1844.14	2456.13	1987.4	1271.08	1336.49	2362.04	1489.3	1601.31	1872.09	1686.58	2460.32	1746.44	1534.33	1078.64	1885.76	1113.51	1507.37	2843.06	2043.47	1590.37	1332.05	1968.65	1090.25	2230.69	2087.34	2161.24	2299.7	1221.96	1115.94	1845.42	2415.77	2327.4	1402.76	1789.58	1221.01	2177.6
41	1785.87	1865.15	2619.73	1920.76	1817.97	3446.82	2161.96	1412.88	1409.85	1862.09	1312.17	1332.77	2250.53	1855.14	2452.74	1993.56	1263.56	1349.22	2369.23	1494.41	1600.07	1875.92	1684.33	2474.16	1738.37	1545.83	1072.9	1883.33	1109.24	1502.32	2832.91	2043.98	1594.84	1335.88	1965.55	1090.42	2241.01	2081.69	2175.74	2287.54	1219.29	1118.81	1861.32	2421.94	2325.43	1401.33	1781.05	1232.72	2178.4
42	1794.53	1869.51	2626.57	1928.18	1822.9	3436.25	2170.05	1417.47	1410.28	1869.61	1300.96	1337.84	2258.35	1868.7	2463.97	2010.81	1266.37	1345.59	2382.79	1498.37	1610.69	1869.67	1692.62	2473.98	1729.63	1559.04	1079.54	1900.06	1108.62	1508.47	2826.63	2081.37	1595.31	1328.58	1962.75	1091.09	2243.5	2080.79	2167.2	2292.31	1230.83	1118.14	1865.58	2410.48	2341.94	1398.4	1778.24	1235.96	2180.06
43	1797.61	1870.04	2626.28	1940.53	1822.65	3444.09	2156.24	1416.16	1406.84	1874.96	1306.38	1344.04	2251.86	1878.98	2471.27	2013.83	1248.68	1355.26	2373.58	1504.88	1597.89	1881.19	1692.52	2479.05	1731.24	1563.08	1079.16	1907.1	1109.47	1501.01	2822.35	2086.85	1597.07	1327.01	1964.76	1095.74	2240.9	2078.62	2178.02	2302.68	1244.46	1117.27	1890.65	2407.11	2344.21	1408.77	1769.61	1226.07	2176.44
44	1795.67	1868.66	2623.66	1935.26	1829.99	3438.58	2143.66	1417.96	1405.71	1881.51	1305.6	1338.94	2260.57	1887.28	2489.3	2030.55	1253.75	1359.06	2385.77	1498.94	1598.26	1882.18	1697.93	2480.2	1732.43	1581.21	1073.77	1904.88	1104.07	1493.11	2807.59	2053.49	1606.9	1322.49	1977.42	1103.93	2250.15	2071.4	2180.13	2308.53	1242.1	1118.8	1906.85	2418.65	2334.64	1416.99	1771.94	1235.75	2176.31
45	1801.53	1871.9	2639.91	1944.91	1824.64	3445.34	2141.75	1415.59	1408.03	1881.22	1294.6	1346.96	2275.11	1905.48	2481.39	2045.7	1244.15	1364.03	2389.51	1499.26	1593.33	1884.99	1698.13	2484.61	1737.12	1586.08	1082.88	1916.33	1099.81	1491.47	2806.31	2089.52	1607.95	1335.68	1985.8	1102.19	2249.83	2066.45	2173.76	2312.73	1234.7	1130.51	1884.77	2407.57	2335.35	1413.68	1771.98	1223.43	2169.96
46	1803.52	1873.27	2632.13	1940.6	1829.34	3441.69	2135.76	1414.39	1411.72	1882.73	1297.64	1347.01	2274.03	1909.11	2487.35	2044.65	1250.93	1376.42	2392.87	1494.39	1582.13	1892.75	1690.11	2485.84	1736.65	1585.91	1090.93	1920.95	1090.75	1488.53	2807.06	2098.57	1607	1315.43	1981.98	1087.22	2237.74	2045.76	2185.81	2297	1240.06	1128.53	1886.92	2441.07	2337.58	1427.45	1770.56	1240.17	2169.99
47	1815.45	1868.96	2644.23	1938.47	1840.52	3448.7	2143.04	1410.04	1403.58	1889.41	1307.18	1351.5	2275.43	1922.4	2479.21	2054.42	1231.58	1372.45	2404.11	1499.48	1584.43	1906.02	1689.78	2488.96	1729.26	1610.51	1086.49	1920.67	1096.18	1492.48	2796.87	2119.42	1610.48	1324.06	1983.53	1092.82	2251.73	2058.42	2178.15	2295.84	1249.68	1133.06	1892.23	2439.97	2339.9	1427.65	1759.79	1234.13	2174.24
48	1812.99	1868.17	2641.87	1937.61	1842.72	3455.62	2141.71	1408.94	1405.01	1899.18	1309.85	1346.56	2285.65	1943.99	2479.9	2067.33	1240.98	1369.5	2407.02	1499.9	1585.05	1910.48	1704.32	2492.36	1725.96	1604.77	1086.8	1942.09	1101.78	1495.35	2803.43	2114.3	1615.22	1320.28	1976.34	1082.19	2234.9	2068.93	2181.09	2291.33	1246	1119.17	1930.83	2353.08	2354.48	1429.52	1758.23	1236.35	2170.79
49	1802.77	1869.45	2653.54	1945.45	1848.57	3458.28	2140.63	1414.5	1404.9	1890.93	1314.23	1343.47	2303.77	1939.88	2477.6	2062.8	1240.81	1369.26	2402.98	1500.31	1595.51	1916.53	1693.13	2499.77	1719.54	1626.49	1092.65	1956.56	1101.32	1501.72	2806.22	2126.8	1612.01	1331.34	2014.8	1105.49	2261.69	2079.9	2185.5	2300.36	1249.46	1139.38	1920.46	2435.75	2355.05	1433.38	1768.68	1255.33	2168.95
50	1818.58	1872.05	2662.22	1944.03	1853.38	3467.26	2134.8	1416.86	1392.05	1896.78	1308.56	1345.04	2297.63	1956.89	2470.2	2067.72	1242.31	1382.13	2417.64	1493.37	1584.77	1917.8	1708.91	2498.38	1719.25	1638.77	1092.94	1952.35	1094.2	1501.01	2785.73	2133.24	1615.29	1329.61	2003.52	1111.31	2262.1	2079.53	2191.34	2310.44	1262.59	1136.44	1931.42	2436.38	2351.99	1439.38	1760.22	1246.14	2155.85
[truncated: 124 more columns]

## Sheet: Y-27 20180220 60
	1	1	1	1	2	2	2	2	2	3	3	3	3	3	4	4	4	4	5	5	5	5	1	2	5		1	1	1	1	2	2	2	2	2	3	3	3	3	3	4	4	4	4	5	5	5	5	1
	1	3	4	5	1	2	3	5	6	1	2	3	4	6	1	2	3	4	1	2	4	9	2	4	8		1	3	4 shift 2-0	5	1	2	3	5 shift 2-0	6 shift 2-0	1	2 shift 4-0	3	4	6	1	2 shift 4-0	3	4	1 shift 2-0	2	4	9	2
0	2247.62	1470.5	2818.32	1680.36	2066.08	2069.34	2591.99	1588.35	1679.81	1632.82	1513.14	2704.62	3116.4	1107.05	2273.34	2739.29	1737.45	2222.97	1883.63	2132.18	1443	2523.36	2123.75	1752.66	2032.15		100	100	100	100	100	100		100	100	100	100	100	100	100	100	100	100	100	100	100	100	100
1	2216.76	1429.5	2743.76	1638.59	1981.18	1939.97	2543.3	1521.16	1592.58	1562.47	1441.32	2581.04	3068.81	1048.49	2263.31	2576.98	1696.3	2213.61	1798.18	2108.15	1336.14	2448.91	2127.67	1736.83	2040.82		98.6272	97.2125	96.9743	97.5142	95.8909	93.7484		95.0506	94.0826	95.6916	98.5568	95.4309	98.4729	94.7104	99.5585	98.4622	97.6317	99.5788	97.3634	98.8728	92.5945	97.0493
2	2181.74	1396.68	2676.71	1624.83	1918.55	1834.29	2518.58	1461.1	1481.95	1506.67	1390.49	2421.76	3037.33	987.308	2253.42	2487.67	1659.33	2178.29	1714.2	2087.64	1242.13	2380.42	2139.5	1738.07	2044.46		97.0692	94.9803	94.8678	96.6952	92.8596	88.6415		91.0575	91.3075	92.274	97.1861	89.5419	97.4628	89.184	99.1235	97.2498	95.504	97.9899	94.9737	97.9107	86.0795	94.3354
3	2167.08	1378.39	2595.72	1611.56	1862.17	1775.59	2496.83	1388.78	1394.26	1453.87	1366.87	2265.31	3001.3	971.489	2237.94	2425.34	1633.19	2134.36	1669	2059.28	1191.37	2312.47	2127.55	1737.86	2052.81		96.4167	93.7367	94.0603	95.9053	90.131	85.8048		89.1029	89.2435	89.0406	95.4155	83.7572	96.3066	87.7551	98.4426	96.1242	93.9992	96.0137	93.28	96.5806	82.5623	91.6423
4	2150.18	1341.78	2539.33	1597.85	1829.7	1721.6	2477.33	1330.44	1353.13	1416.13	1331.56	2116.72	2993.9	938.241	2220.93	2382.42	1599.5	2117.51	1628.04	2048.5	1151.42	2261.32	2141.52	1743.86	2057.81		95.6652	91.2467	93.6381	95.0897	88.5591	83.1957		87.6814	86.8065	86.7288	94.9905	78.2632	96.0693	84.7517	97.6945	94.8303	92.0601	95.256	91.6438	96.0754	79.7938	89.6152
5	2131.72	1331.06	2517.72	1596.18	1799.25	1669.89	2487.14	1301.88	1322.54	1392.71	1312.34	2005.68	2981.29	918.945	2199.2	2345.78	1568.45	2092.44	1599	2037.44	1126.02	2229.04	2149.21	1732.59	2079.57		94.8437	90.5179	93.3936	94.9899	87.0855	80.6966		84.2833	84.7639	85.2948	95.1316	74.1577	95.6647	83.0088	96.7387	94.127	90.2731	94.128	89.9446	95.5566	78.0335	88.3362
6	2124.31	1308.8	2506.42	1590.15	1760.78	1625.37	2465.12	1281.11	1286.43	1358.91	1294.09	1913.77	2964.03	906.337	2187.76	2316.89	1539.18	2056	1570.96	2023.72	1113.69	2204.16	2130.52	1719.2	2068.88		94.5142	89.0039	92.174	94.631	85.2234	78.5452		83.2679	83.2695	83.2249	94.1822	70.7593	95.1107	81.8699	96.2355	94.3082	88.5884	92.4888	88.3384	94.9132	77.1787	87.35
7	2103.8	1278.75	2499.88	1585.99	1730.33	1567.83	2438.41	1231.46	1256.16	1324.33	1270.51	1834.63	2936.31	886.631	2165.5	2290.08	1513.22	2021.07	1541.83	2006.11	1079.46	2157.53	2138.3	1701.09	2067.18		93.6014	86.9608	91.2915	94.3837	83.7494	75.7647		81.9546	81.8664	81.1068	94.4614	67.8334	94.2211	80.0898	95.2562	93.7227	87.0944	90.9175	86.5576	94.0873	74.8068	85.5023
8	2075.09	1266.69	2467.23	1581.98	1701.2	1531.61	2437.33	1216.63	1234.01	1296.88	1264.85	1790.44	2918.11	875.997	2157.32	2259.25	1496.38	1979.14	1514.29	1990.48	1067.41	2127.92	2130.84	1701.67	2062.36		92.3241	86.1405	91.1941	94.1449	82.3397	74.0146		80.1952	80.5987	79.4259	94.5084	66.1993	93.6372	79.1292	94.8965	93.3724	86.1251	89.0311	85.7716	93.354	73.9719	84.3288
9	2053.53	1255.62	2443.61	1575.21	1695.59	1507.54	2455.65	1197.44	1213.22	1283.01	1266.73	1735.14	2892.86	881.971	2153.13	2242.5	1469.18	1946.61	1483.77	1964.71	1058.41	2097.14	2131.31	1679.7	2071.03		91.3647	85.3875	90.338	93.7424	82.0679	72.851		81.0979	80.7606	78.5763	94.9626	64.1549	92.827	79.6689	94.7118	93.3135	84.5595	87.5677	84.0939	92.1455	73.348	83.1089
10	2054.11	1234.46	2441	1566.19	1663.98	1464.58	2441.13	1171.73	1194.43	1269.83	1254.09	1713.32	2867.58	862.533	2154.11	2246.81	1465.45	1929.54	1470.29	1950.64	1052.39	2065.68	2127.5	1689.5	2064.65		91.3905	83.9489	90.2969	93.2051	80.5381	70.7752		81.684	81.0657	77.7691	95.8237	63.348	92.0157	77.913	94.7551	93.5575	84.3452	86.7998	84.0684	91.4857	72.9309	81.8621
11	2038.07	1227.68	2418.08	1572.26	1669.96	1444.57	2438.83	1184.92	1196.83	1265.14	1257.81	1690.43	2854.35	869.779	2149.89	2232.87	1453.09	1916.37	1441.53	1948.37	1044.68	2046.51	2115.75	1683.57	2054.16		90.6771	83.4875	89.1739	93.5667	80.8276	69.8084		82.2252	81.7155	77.4819	96.3068	62.5016	91.5913	78.5675	94.5695	93.7959	83.6338	86.2074	83.6332	91.3789	72.3966	81.1025
12	2017.97	1223.27	2416.99	1571.91	1652.64	1427.71	2463.01	1193.48	1201.35	1258.41	1258.43	1673.35	2853.77	857.272	2159.26	2224.52	1444.79	1904.06	1441.1	1951.59	1045.37	2028.69	2119.2	1671.36	2057.47		89.7826	83.1879	89.1636	93.546	79.9892	68.9935		82.9391	81.2518	77.0698	95.6669	61.8703	91.5725	77.4378	94.9818	93.8345	83.1561	85.6539	83.5995	91.5302	72.4445	80.396
13	2009.03	1232	2386.93	1567.76	1651.24	1405.83	2461.12	1201.39	1210.98	1259.48	1264.48	1675.46	2851.23	873.046	2154.11	2223.12	1433.31	1896.62	1433.64	1947.58	1046.14	2027.83	2118.64	1666.4	2055.43		89.3848	83.7812	88.4927	93.2985	79.9217	67.9361		83.3241	82.2139	77.1349	96.4014	61.9481	91.4912	78.8626	94.7554	94.1863	82.4954	85.3191	83.0464	91.342	72.4974	80.3621
14	2005.08	1226.09	2386.65	1559.7	1648.09	1402.35	2451.6	1211.82	1204.11	1257.84	1275.95	1675.13	2839.01	875.899	2158.63	2228.93	1430.32	1876.93	1433.06	1933.79	1047.79	2014.94	2117.38	1666.9	2061.24		89.2092	83.3793	88.4345	92.8189	79.7691	67.768		84.1905	82.8551	77.035	96.3242	61.936	91.0989	79.1204	94.9541	94.1015	82.3233	84.4334	82.7335	90.6953	72.612	79.8514
15	1974.11	1220.37	2368.69	1560.15	1650.88	1404.77	2447.82	1217.45	1218.37	1269.61	1282.38	1676.91	2818.82	878.157	2155.04	2234.61	1430.05	1872.54	1423.58	1938.34	1042.05	2022.3	2111.82	1659.68	2060.24		87.8312	82.9906	88.3236	92.8459	79.904	67.8851		84.7736	82.1839	77.7553	95.8422	62.0017	90.4513	79.3243	94.7959	94.078	82.3074	84.2358	83.2753	90.9086	72.2143	80.1431
16	1958.04	1229.15	2367.13	1557.18	1642.1	1408.8	2450.58	1230.11	1227.87	1267.55	1273.86	1679.92	2832.23	875.864	2151.71	2235.53	1420.18	1866.98	1418.22	1931.25	1058.56	2021.62	2097.73	1653.96	2067.99		87.1161	83.5877	88.5773	92.6693	79.4792	68.0797		85.3954	83.0547	77.6296	97.1053	62.1133	90.8816	79.1172	94.6496	94.1324	81.7396	83.9857	82.1115	90.5763	73.3583	80.1163
17	1951.19	1217.3	2364.16	1557.33	1653.96	1415.92	2431.77	1238.62	1217.92	1223.61	1283.64	1675.09	2843.8	879.419	2144	2243.91	1413.91	1882.07	1427.5	1923.11	1050.56	2023.77	2094.89	1637.48	2066.82		86.8115	82.7814	88.4298	92.678	80.0531	68.4236		86.2803	83.6598	74.9386	97.2426	61.9346	91.2528	79.4383	94.3103	94.3119	81.3785	84.6646	83.0628	90.1943	72.8037	80.2013
18	1945.98	1225.97	2370.96	1558.67	1646.08	1416.2	2444.9	1247.71	1230.83	1229.08	1282.61	1695.08	2842.24	882.471	2147.06	2241.89	1411.72	1872.07	1407.55	1934.31	1054.96	2029.92	2099.94	1635.8	2058.66		86.5797	83.3714	88.6069	92.7578	79.672	68.4371		87.3107	83.8277	75.2736	96.6219	62.6734	91.2027	79.714	94.445	94.7173	81.2528	84.2147	82.7003	90.7197	73.1086	80.4449
19	1936.96	1221.69	2367.01	1555.34	1650.43	1442.61	2438.05	1260.64	1239.8	1227.26	1276.19	1710.55	2836.16	896.299	2146.82	2241.33	1413.89	1892.39	1423.86	1936.34	1058.25	2035.87	2086.12	1629.34	2048.81		86.1784	83.0799	88.6875	92.5594	79.8824	69.7137		86.3112	85.0784	75.1621	97.1874	63.2456	91.0077	80.9631	94.4345	94.513	81.3776	85.1289	83.3676	90.815	73.3368	80.6807
20	1902.1	1225.4	2371.75	1558.62	1650.91	1443.54	2441.07	1275.69	1242.29	1246.71	1293.01	1731.76	2842.18	895.143	2131.57	2242.63	1402.44	1888.12	1417.65	1922.16	1065.63	2046.59	2084.22	1626.35	2046.32		84.6275	83.3324	88.9409	92.7546	79.9058	69.7587		86.4573	84.9316	76.3531	98.2132	64.0299	91.2009	80.8587	93.7634	94.9726	80.7187	84.9369	83.2761	90.1496	73.8485	81.1058
21	1901.68	1211.39	2373.91	1550.53	1653.33	1448.07	2444.76	1261.09	1260.82	1238.75	1294.84	1737.93	2852.99	903.601	2138.22	2246.9	1395.63	1894.26	1429.09	1917.8	1069.59	2067.35	2079.14	1617.94	2044.31		84.6088	82.3799	89.0389	92.2737	80.0225	69.9774		86.8428	85.9006	75.8657	98.1157	64.2578	91.5477	81.6227	94.0563	94.8329	80.3267	85.213	83.1423	89.9452	74.1226	81.9285
22	1910.87	1214.55	2380.69	1559.65	1652.96	1462.72	2437.14	1263.23	1258.65	1248.46	1286.58	1765.2	2857.5	904.235	2145.71	2256.56	1401.51	1910.87	1427.52	1932.79	1070.22	2086.16	2078.38	1616.05	2042.75		85.0178	82.5943	88.9834	92.8162	80.0048	70.6854		87.0322	85.8715	76.4604	98.476	65.2662	91.6924	81.68	94.3857	94.6935	80.6649	85.9602	83.6402	90.6484	74.1666	82.6738
23	1906.32	1221.56	2383.31	1567.63	1656.07	1475.8	2437.22	1268.86	1273	1258.49	1294.11	1774.79	2850.33	910.164	2140.36	2251.69	1403.13	1917.24	1425.22	1936.74	1080.8	2085.08	2062.89	1600.77	2042.98		84.8152	83.0711	88.9173	93.2913	80.1552	71.3175		87.9232	86.2811	77.0746	98.6418	65.6209	91.4622	82.2156	94.1502	94.9994	80.7584	86.2466	83.9115	90.8337	74.8994	82.6309
24	1900.02	1220.32	2381.83	1565.39	1661.44	1482.92	2441.18	1271.63	1272.57	1260.19	1307.77	1795.99	2869.05	925.273	2127.89	2262.64	1400.08	1932.54	1433.76	1937.85	1095.22	2093.16	2060.19	1612.84	2039.99		84.5351	82.9869	89.116	93.1576	80.4154	71.6615		87.8913	87.4627	77.1784	98.5761	66.4047	92.063	83.5803	93.6019	94.8812	80.5824	86.9348	84.8527	90.8855	75.899	82.9512
25	1905.19	1219.38	2380.06	1571.85	1662.64	1496.25	2442.99	1284.64	1278.64	1268.97	1306.47	1825.87	2855.95	933.275	2128.86	2259.32	1404.78	1933.27	1438.41	1926.98	1090.56	2100.81	2064.51	1601.48	2042.29		84.7648	82.9233	88.699	93.5424	80.4732	72.3057		88.7245	87.6273	77.7166	98.8415	67.5095	91.6427	84.3032	93.6443	95.0735	80.8528	86.9679	84.5803	90.3758	75.5758	83.2543
26	1888.83	1220.37	2385.38	1574.43	1657.37	1510.06	2432.01	1284.18	1296.15	1265.43	1311.27	1846.55	2869.43	929.547	2141.22	2255.99	1409.8	1942.71	1454.54	1939.94	1095.6	2113.66	2069.16	1603.94	2040.27		84.0369	82.9904	88.9122	93.6956	80.218	72.9728		88.5379	88.4231	77.4997	99.9453	68.2741	92.0752	83.9664	94.1882	95.2438	81.1419	87.3926	85.8621	90.9835	75.9253	83.7635
27	1878.88	1219.25	2374.21	1577.56	1658.1	1515.24	2440.03	1296.35	1298.59	1277.96	1313.47	1849.98	2874.14	936.896	2134.41	2263.28	1406.78	1941.72	1449.87	1949.08	1108	2125.72	2058.82	1605.88	2036.68		83.5945	82.9145	88.9483	93.8821	80.2533	73.2232		88.7038	88.1565	78.2668	100.147	68.4009	92.2263	84.6302	93.8887	95.6303	80.9685	87.3481	85.6194	91.4125	76.7843	84.2414
28	1883.05	1225.95	2379.92	1582.7	1666.99	1537.05	2447.62	1293.63	1310.39	1281.9	1312.6	1874.74	2886.83	947.852	2132.75	2260.47	1410.41	1959.91	1471.85	1948.53	1110.13	2145.65	2054.18	1600.03	2038.73		83.7798	83.3699	88.7934	94.1877	80.6841	74.2773		90.3616	88.9138	78.5084	100.874	69.3162	92.6334	85.6199	93.8157	95.4769	81.1772	88.1661	85.8805	91.3867	76.9321	85.0314
29	1898.53	1224.87	2380.89	1586.93	1671.2	1533.45	2443.61	1296.05	1306.44	1288.85	1316.13	1895.41	2886.08	950.423	2138.43	2265.05	1424.66	1969.74	1467.69	1947.64	1128.24	2152.67	2054.69	1597.73	2041.61		84.4685	83.2961	88.9679	94.4397	80.8878	74.1032		89.3267	88.6938	78.9339	101.807	70.0807	92.6094	85.8521	94.0654	96.0249	81.9971	88.6082	86.7282	91.3448	78.1872	85.3095
30	1893.67	1221.8	2376.74	1584.66	1654.07	1549.74	2458.53	1320.27	1317.66	1285.51	1330.83	1910.82	2888.99	947.267	2140.53	2269.11	1428.76	1986.5	1472.16	1951.08	1138.11	2167.97	2040.11	1599.15	2044.65		84.2526	83.0879	88.7659	94.3043	80.0585	74.8906		90.3585	89.7736	78.7294	102.669	70.6505	92.7027	85.567	94.1576	96.0656	82.2334	89.3625	87.5565	91.5062	78.8711	85.9158
31	1887.79	1234.07	2381.41	1584.94	1668.67	1560.38	2454.24	1305.15	1314.4	1290.59	1333.51	1928.61	2888.47	940.655	2141.29	2278.31	1443.47	1987.36	1486.69	1959.44	1142.2	2161.05	2050.38	1601.29	2052.11		83.9906	83.922	88.2889	94.3213	80.7654	75.4049		90.0426	90.1546	79.0402	102.926	71.308	92.686	84.9698	94.1914	96.1671	83.0797	89.4011	88.3217	91.898	79.1544	85.6418
32	1886.19	1234.75	2376	1600.11	1659.54	1574.72	2466.2	1320.23	1330.4	1292.05	1343.2	1948.73	2904.4	957.28	2130.54	2274.66	1452.02	1989.09	1500.89	1969.65	1156.91	2166.72	2057.71	1601.12	2044.8		83.9198	83.9682	88.7158	95.2238	80.3233	76.0976		89.7468	90.3357	79.1296	103.62	72.0521	93.1974	86.4716	93.7184	96.5408	83.5722	89.4789	88.5682	92.377	80.1742	85.8662
33	1881.98	1229.77	2363.24	1600.99	1671.25	1589.35	2469.42	1315.61	1336.05	1305.16	1355.63	1950.81	2896.21	967.44	2129.14	2287.71	1456.02	1999.5	1514.01	1971.4	1168.7	2172.08	2056.34	1604.92	2052.36		83.7321	83.6298	88.847	95.2765	80.8902	76.8049		89.9319	90.5549	79.9325	104.394	72.1291	92.9344	87.3893	93.6566	94.2257	83.8023	89.9471	88.7905	92.459	80.9911	86.0788
34	1900.14	1245.45	2374.66	1596.18	1683.75	1586.58	2485.94	1311.29	1338.73	1319.58	1367.1	1973.7	2910.16	969.791	2127.4	2288.68	1462.12	2009.49	1518.23	1970.16	1187.29	2182.68	2044.78	1600.34	2053.73		84.5404	84.6961	88.5258	94.9898	81.4948	76.6707		89.4333	91.2759	80.8158	105.403	72.9752	93.3822	87.6017	93.5803	94.2206	84.1534	90.3964	89.517	92.4012	82.2791	86.499
35	1892.46	1238.79	2378.18	1597.71	1695.29	1601	2490.72	1313.99	1341.98	1304.44	1370.53	1975.09	2912.05	977.208	2139.77	2291.1	1477.64	2010.35	1522.04	1960.35	1192.36	2196.38	2050.57	1606.76	2056.02		84.1986	84.2429	88.5564	95.0814	82.0538	77.3675		89.5599	91.1663	79.8886	104.979	73.0268	93.4427	88.2717	94.1242	94.3069	85.0464	90.4352	90.2116	91.9408	82.6306	87.0416
36	1885.1	1241.54	2369.58	1612.45	1686.43	1616.83	2490.8	1306.71	1352.66	1321.98	1379.76	2001.1	2915.78	981.184	2134.66	2300.01	1477.17	2014.84	1534.5	1972.43	1200.31	2216.26	2046.77	1600.05	2049.63		83.8713	84.4302	88.5041	95.9582	81.6248	78.1329		89.9201	90.304	80.9627	106.424	73.9883	93.5625	88.6308	93.8996	94.3682	85.0197	90.6371	90.7133	92.5077	83.1813	87.8295
37	1898.12	1245.9	2370.4	1605.03	1691.29	1629.06	2506.31	1308.56	1351.04	1317.8	1390.07	2005.15	2904.78	986.206	2133.28	2244.85	1476.78	2028.14	1546.4	1979.38	1195.78	2221.33	2050.14	1607.64	2058.16		84.4506	84.7263	87.7976	95.5166	81.8601	78.7237		89.4183	91.4535	80.7071	106.83	74.1381	93.2096	89.0844	93.8391	94.111	84.9973	91.2355	91.2116	92.8336	82.8679	88.0306
38	1887.3	1245.72	2369	1623.09	1696.6	1650.47	2517.13	1313.82	1338.26	1331.94	1403.5	2032.51	2903.35	986.233	2140.68	2244.73	1487.85	2031.12	1555	1983.67	1209.88	2212.84	2043.83	1606.5	2056.9		83.9689	84.7143	88.666	96.5916	82.1168	79.7586		89.855	91.0671	81.5726	106.631	75.1498	93.1635	89.0869	94.1644	93.8284	85.6345	91.3694	91.1406	93.0348	83.8445	87.6939
39	1908.31	1257.6	2350.09	1615.63	1703.5	1652.07	2499.55	1306.49	1355.3	1336.7	1397.86	2027.97	2904.96	1002.27	2133.15	2246.78	1497.83	2039.29	1563.55	1989.29	1216.23	2229.28	2040.52	1610.04	2060.02		84.9037	85.5219	88.2615	96.1476	82.4511	79.8359		89.2099	91.7882	81.8647	108.023	74.9817	93.2152	90.5356	93.8333	95.0755	86.2087	91.7373	91.9606	93.2983	84.285	88.3454
40	1907.05	1261.39	2373.33	1612.81	1708.56	1657.12	2502.12	1312.87	1349.57	1328.68	1417.09	2041.2	2899.73	1001.83	2138.67	2248.24	1502.16	2033.61	1562.33	1985.06	1224.66	2219.65	2042.76	1611.92	2070.82		84.8479	85.7798	88.0303	95.9799	82.6957	80.0799		89.2467	91.7973	81.373	109.047	75.4709	93.0476	90.4953	94.0761	94.9326	86.4576	91.4816	92.6597	93.0998	84.869	87.9637
41	1924.61	1271.14	2362.5	1607.79	1703.14	1669.4	2507.53	1303.44	1360.26	1340.31	1422.5	2051.31	2910.63	1006.12	2145.44	2242.12	1505.44	2044.87	1576.39	2003.33	1220.69	2232.12	2044.58	1616.12	2062.18		85.6291	86.4431	87.7539	95.681	82.4336	80.6733		88.5793	91.9484	82.0857	109.163	75.8448	93.3973	90.8829	94.374	94.756	86.6469	91.9879	93.1081	93.9566	84.594	88.4581
42	1911.99	1277	2356.32	1615.2	1719.99	1668.73	2522.66	1303.98	1360.39	1327.29	1419.85	2044.54	2910.27	996.412	2148.92	2235.38	1504.76	2040.73	1588.37	1999.14	1215.22	2245.37	2042.26	1611.48	2066.71		85.0675	86.8414	87.5699	96.1219	83.2491	80.6409		89.1932	93.0293	81.2883	109.617	75.5946	93.3857	90.0064	94.5268	95.3651	86.6074	91.8019	93.1009	93.7601	84.2149	88.983
43	1923.44	1287.36	2348.92	1619.28	1712.19	1679.12	2514.18	1294.23	1362.63	1343.76	1438.39	2046.16	2906.4	1011.44	2157.11	2265.09	1516.25	2065.21	1596.06	1999.31	1242.44	2247.29	2031.8	1614.47	2084.76		85.577	87.5458	87.6552	96.3646	82.8714	81.1429		88.9706	93.2275	82.2965	110.067	75.6543	93.2614	91.3643	94.8873	95.1948	87.2688	92.9031	93.6723	93.7683	86.1012	89.0594
44	1921.71	1300.72	2343.99	1625.26	1714.21	1687	2522.93	1303.2	1378.65	1348.28	1452.03	2061.3	2891.89	1010.01	2152.15	2261.69	1526.82	2054.35	1595.93	1999.99	1241.28	2242.98	2041.97	1606.4	2079.89		85.4999	88.4543	87.6655	96.7205	82.9691	81.5238		89.0734	92.5167	82.5734	110.489	76.214	92.796	91.2344	94.669	95.0955	87.8774	92.4147	94.9359	93.8002	86.0208	88.8883
45	1919.89	1308.92	2346.28	1629.5	1734.28	1687.28	2524.11	1299.95	1381.59	1364.61	1453.56	2069.63	2904.33	1018.28	2163.93	2257.48	1536.47	2058.96	1605.73	1999.57	1244.11	2257.14	2043.38	1622.36	2077.15		85.4188	89.0124	87.8668	96.9731	83.9408	81.5372		89.9322	92.3123	83.5734	111.058	76.5222	93.1952	91.9815	95.187	95.4714	88.4328	92.6219	94.3045	93.7804	86.2166	89.4495
46	1925.71	1311.62	2346.55	1623.65	1736.37	1693.76	2516.84	1301.45	1371.05	1343.87	1459.62	2071.69	2903.8	1022.34	2153.51	2271.99	1527.71	2058.68	1627.39	2009.38	1237.99	2260.45	2044.16	1634.31	2079.96		85.6778	89.1959	87.7486	96.6249	84.0419	81.8502		89.2431	92.8776	82.3038	110.984	76.5984	93.1781	92.3485	94.7289	95.4918	87.9286	92.6094	95.7359	94.2405	85.7926	89.5809
47	1925.2	1323.09	2351.94	1633.43	1726.7	1699.54	2511.53	1314	1368.02	1360.41	1465.6	2074.73	2905.41	1020.31	2162.77	2267.94	1539.18	2072.46	1616.57	2007.32	1240.69	2268.27	2051.65	1636.49	2077.96		85.655	89.9758	87.5303	97.207	83.5741	82.1295		89.9483	92.7767	83.3166	111.06	76.7108	93.2297	92.1651	95.1363	95.3513	88.5888	93.2294	96.1147	94.1437	85.9802	89.8907
48	1928	1325.75	2348.77	1642.25	1744.15	1700.01	2513.97	1303.93	1376.4	1346.14	1471.23	2077.41	2896.49	1019.54	2161.74	2265.57	1536.79	2086.78	1641.1	2001.38	1259.24	2268.27	2051.11	1648.07	2092.7		85.7798	90.1565	87.8053	97.7316	84.4183	82.1521		90.1471	93.5012	82.4428	111.641	76.8099	92.9436	92.0952	95.0909	96.1242	88.4511	93.8735	96.136	93.8651	87.2653	89.8907
49	1929.96	1344.96	2342.93	1635.85	1746.6	1693.8	2519.27	1314.23	1374.9	1368.73	1478.8	2094.6	2905.33	1030.37	2174.34	2274.53	1547.08	2093.57	1647.6	1995.29	1248.22	2255.56	2052.81	1652.9	2081.77		85.8671	91.4632	87.813	97.3508	84.5372	81.8524		89.3539	93.3326	83.8263	111.63	77.4453	93.2271	93.0734	95.6449	95.2607	89.0436	94.1788	96.5109	93.5794	86.5014	89.387
50	1930.71	1345.4	2350.29	1632.94	1744.2	1697.59	2521.43	1317.14	1385.64	1351.53	1477.82	2092.59	2902.82	1026	2167.22	2275.01	1552.22	2102.66	1647.96	1988.71	1250.99	2263.92	2052.96	1651	2075.58		85.9005	91.4928	87.61	97.1778	84.4208	82.0356		90.0818	92.9894	82.7723		77.3711	93.1465	92.679	95.332		89.3389	94.5876	97.0614	93.2709	86.6936	89.7184
51	1934.56	1360.18	2350.5	1632.3	1745.06	1700.01	2540.47	1305.55	1383.14	1361.16	1478.83	2098.82	2878.46	1033.9	2174.57	2271.67	1556.39	2098.6	1654.39	2008.26	1258.86	2267.03	2034.75	1660.79	2081.69		86.0717	92.4978	87.8692	97.1399	84.4626	82.1523		89.532	92.8097	83.3625		77.6014	92.365	93.3925	95.6549		89.5791	94.4052	96.9398	94.1878	87.239	89.8414
52	1945.2	1369.47	2345.07	1646.62	1745.1	1708.11	2508.07	1316.18	1378.06	1363.39	1486.57	2092.92	2897.47	1035.26	2168.1	2290.08	1556.06	2100.36	1663.82	2002.01	1259.76	2266.23	2038.53	1672.43	2097.84		86.545	93.1297		97.992	84.4647	82.544				83.4988		77.3833	92.9749	93.5155	95.3705		89.5603	94.4842		93.8948	87.3017	89.8098
53	1960.88	1377.69	2352	1638.96	1745.41	1713.22	2510.92	1308.15	1375.39	1356.45	1486.42	2113.9	2890.85	1034.72	2184.06	2269.51	1565.72	2099.34	1661.74	1999.57	1261.23	2263.34	2041.75	1684.02	2093.7		87.2429	93.689		97.5361	84.4793	82.7907				83.0738		78.1588	92.7625	93.4672	96.0725		90.1163	94.4385		93.7806	87.4037	89.6953
[truncated: 5 more columns]

## Sheet: EIPA 20180516
	1	1	1	1	1	1	2	2	2	2	2	2	2	2	3	3	3	3	3	4	4	4	4	4	4	6	6	6	6	6	6	6	6	6	7	7	7	7	7	7	7	7	7	7	7	7	7	7	7
	1	3	4	5	7	8	1	4	7	8	10	11	12	13	1	2	4	5	14	1	2	3	4	5	6	1	2	4	6	9	10	12	13	14	1	2	4	5	6	7	8	9	10	11	12	13	14	15	16
0	2202.88	2102.84	1401.16	2369.05	1761.72	2046.3	1457.42	2103.51	1389.03	2168.63	1577.76	1593.62	1143.18	2204.11	1728.96	1668.97	1141.36	2994.8	2103.45	1838.29	1764.01	1699.19	1961.7	1940.86	1316.19	1513.61	1586.53	1432.61	2096.54	1325.98	1260	2576.53	1203.54	1914.38	1215.37	1987.41	1397.16	1332.12	1062.55	2164.74	1915.44	1818.2	1030.94	1738.45	1744.19	1705.87	1386.46	1525.02	1410.47
1	2211.4	2093.88	1395.48	2386.78	1750.3	2009.8	1439.05	2108.69	1392.8	2161.05	1569.29	1591.43	1147.63	2186.99	1694.54	1651.49	1129.26	2998.93	2116.5	1815.84	1774.16	1703.22	1963.99	1918.82	1326.65	1519.49	1599.2	1433.47	2092.4	1311.1	1265.93	2562.21	1213.64	1904.05	1213.74	1986.57	1390.01	1327.85	1066.89	2150.58	1915.37	1819.05	1042.56	1744.44	1741.53	1704.41	1351.88	1531.99	1406.67
2	2219.28	2087.41	1403.57	2376.69	1751.44	2001.04	1424.79	2086	1392.9	2179.45	1567.86	1590.54	1128.43	2169.42	1662.16	1642.51	1113.25	2985.53	2116.17	1816.67	1779.94	1701.81	1959.75	1890.84	1316.5	1512.16	1602.84	1443.3	2085.6	1303.28	1272.93	2545.21	1208.24	1896.04	1168.41	1966.46	1376.57	1324.4	1073.36	2120.13	1915.22	1802.51	1046.76	1728.61	1735.41	1696.62	1352.44	1531.47	1404.77
3	2220.84	2061.17	1402.31	2369.79	1752.61	1994.63	1417.96	2076.82	1391.22	2189.73	1572.56	1582.22	1131.16	2162.68	1656.16	1635.19	1106.31	2997.33	2124.2	1800.98	1784.07	1687.24	1961.41	1868.25	1321.13	1492.96	1603.75	1447.01	2090.93	1307.52	1277.99	2529.15	1219.1	1887.43	1152.17	1949.15	1363.77	1320.59	1083.39	2109.29	1909.49	1798.07	1051.34	1726.58	1737.39	1692.32	1340.76	1523.29	1398.74
4	2229.08	2045.35	1399.88	2374.99	1765.95	1985.74	1402.81	2062.72	1399.74	2186.85	1574.62	1587.78	1127.36	2152.3	1645.91	1630.29	1103.53	2997.98	2125.29	1791.63	1791.06	1672.88	1957.86	1832.44	1319.42	1492.36	1591.86	1444.91	2090.83	1295.63	1271.17	2498.22	1214.68	1862.52	1144.16	1923.87	1342.89	1321.64	1077.48	2083.41	1902.49	1777	1061.69	1729.55	1725.72	1678.65	1328.18	1514.83	1400.18
5	2242.08	2022.18	1392.41	2373.71	1764.28	1985.08	1404.78	2049.47	1409.23	2193	1562.59	1581.43	1120.12	2152.04	1630.75	1626.01	1101.7	3014.06	2142.82	1767.04	1803.78	1658.7	1965.44	1809.02	1318.15	1495.74	1593.49	1434.13	2089.47	1301.12	1278.44	2485.89	1217.74	1856.04	1135.14	1911.77	1330.16	1321.28	1182.22	2062.8	1904.16	1770.59	1072.61	1713.57	1706.38	1671.63	1325.29	1524.62	1392.54
6	2260.66	2004.72	1402.36	2382.9	1762.11	1979.12	1404.34	2031.16	1405.06	2191.64	1571.85	1571.58	1128.77	2137.23	1629.09	1615.6	1099.81	3017.39	2155.42	1761.56	1808.72	1647.51	1963.67	1775.03	1317.71	1484.58	1579.34	1436.5	2095.19	1298.02	1274.9	2482.85	1212.17	1836.48	1146.69	1887	1322.78	1320.57	1082.11	2049.42	1976.02	1757.66	1087.7	1707	1697.5	1668.97	1316.11	1518.25	1386.62
7	2260.15	1994.81	1394.78	2379.86	1759.33	1978.54	1403.35	2032.16	1393.05	2197.76	1573.62	1562.12	1130.51	2131.02	1608.75	1605.69	1101.22	3032.09	2158.02	1765.21	1809.49	1631.64	1963.64	1754.28	1324.53	1489.54	1574.56	1434.97	2093.44	1293.32	1282.45	2475.98	1210.47	1824.25	1188.73	1872.26	1302.16	1316.62	1076.92	2051.35	1906.87	1737.39	1105.55	1709.29	1691.54	1655.04	1315.57	1523.23	1378.62
8	2262.9	1979.95	1385.61	2391.36	1758.62	1977.97	1391.38	2014.15	1383.98	2199.83	1565.46	1556.93	1130.05	2122.98	1601.15	1612.32	1109.99	3046.39	2159.55	1762.74	1806.45	1611.1	1963.65	1734.92	1320.32	1482.89	1558.51	1432.78	2083.28	1280.31	1280.37	2472.61	1212.03	1822.1	1188.77	1859.87	1298.77	1312.9	1074.69	2031.84	1897.32	1722.59	1102.69	1703.8	1674.35	1649.15	1307.12	1529.02	1373
9	2271.7	1971.71	1377.45	2385.22	1754.62	1978.48	1384.71	2019.41	1383.06	2197.57	1573.81	1555.16	1125.87	2128.67	1604.36	1605.15	1119.1	3042.16	2166.33	1756.94	1810.98	1603.02	1964.44	1711.89	1335.64	1478.01	1559.51	1424.49	2081.66	1282.69	1278.81	2472.87	1210.48	1806.04	1184.37	1845.37	1289.55	1312.76	1070.91	2035.69	1900.83	1716.56	1107.76	1710.58	1671.88	1637.05	1315.28	1529.32	1364.39
10	2259.19	1963.47	1365.28	2384.86	1754.22	1968.17	1391	2021.44	1371.6	2207.02	1572.95	1552.2	1125.71	2112.14	1592.7	1595.91	1113.44	3047.65	2167.18	1754.08	1800.25	1585.41	1967.49	1691.99	1325.16	1476.91	1543.19	1415.83	2077.26	1277.31	1268.46	2469.31	1205.33	1798.23	1184.75	1838.05	1278.44	1309.64	1070.4	2035.1	1902.38	1710.43	1117.62	1716.22	1663.27	1633.09	1312.62	1529.9	1361.61
11	2267.75	1960.38	1363.46	2383.21	1744.56	1976.78	1380.92	2027.51	1379.78	2200.46	1567.93	1554.77	1126.79	2097.5	1601.81	1597.33	1121.22	3060.92	2164.31	1747.17	1802.02	1581.09	1956.04	1680.19	1321.53	1468.83	1532.36	1417.81	2086.51	1276.97	1279.91	2470.4	1196.27	1791.21	1178.08	1819.8	1270.18	1300.11	1060.93	2026.9	1905.65	1701.55	1123.33	1707.01	1663.08	1632.02	1311.93	1529.99	1362.02
12	2276.77	1952.14	1361.18	2389.37	1751.9	1972.92	1373.57	2024.66	1379.33	2213.85	1561.16	1548.7	1135.14	2105.15	1596.22	1592.09	1132.93	3059.48	2175.74	1735.41	1790.27	1572.62	1960.88	1675.6	1325.51	1456.31	1535.44	1415.46	2070.26	1270.88	1284.6	2456.65	1194.86	1793.78	1185.42	1813.96	1268.98	1301.91	1068.86	2027.05	1892.68	1682.87	1125.23	1706.72	1663.27	1629.22	1308.53	1533.14	1348.23
13	2275.72	1954.83	1352.69	2374.12	1740.47	1978.69	1371.66	2028.37	1377.79	2214.78	1561.58	1561.12	1126.17	2114.4	1608.21	1583.5	1142.67	3054.58	2176.25	1738.03	1783.25	1565.63	1960.68	1661.21	1313.29	1463.8	1533.63	1410.82	2080.28	1276.85	1295.57	2463.01	1189.78	1797.9	1178.96	1811.36	1261.98	1309.64	1061.44	2036.6	1899.45	1687.67	1122.86	1699.42	1656.92	1623.35	1310.72	1529.73	1352.23
14	2276.17	1953.05	1352.25	2371.01	1750.45	1984.23	1360.65	2022.9	1385.43	2211.67	1544.11	1565.37	1138.71	2117.92	1615.78	1589.97	1149.92	3054.51	2177.2	1722.34	1773.24	1561.62	1967.07	1652.99	1319.03	1478.37	1513.25	1407.25	2075.03	1277.6	1297.97	2464.46	1188.12	1791.29	1180.99	1803.3	1255.01	1303.93	1060.12	2036.53	1893.75	1672.22	1123.59	1695.28	1654.84	1624.17	1308.53	1524.23	1349.23
15	2276.77	1946.46	1351.93	2361.44	1752.52	1989.6	1347.73	2034.79	1387.02	2210.79	1532.69	1569.62	1133.47	2120.21	1617.6	1583.69	1145.07	3057.21	2182.58	1726.4	1773.6	1573.97	1961.67	1654.05	1323.05	1447.45	1500.79	1395.13	2076.57	1262.84	1285.84	2458.59	1184.22	1791.59	1174.52	1799.32	1261.67	1305.8	1054.32	2035.86	1889.03	1668.69	1130.43	1687.16	1648.21	1620.82	1306.36	1529.22	1347.47
16	2274.77	1953.34	1349.88	2353.79	1754.26	1984.16	1349.07	2035.45	1390.69	2218.05	1530.55	1569.21	1138.29	2125.56	1616.87	1584.16	1134.6	3044.05	2179.64	1723.24	1771.2	1565.85	1964.15	1659.41	1324.49	1448.49	1496.63	1397.61	2076.62	1259.98	1287.34	2458.58	1187.32	1780.97	1178.02	1798.87	1247.41	1299.2	1049.11	2039.78	1891.06	1671.52	1115.62	1686.46	1650.56	1608.4	1313.06	1531.86	1343.97
17	2273.57	1940.35	1347.72	2355.4	1752.61	1992.86	1343.51	2043.6	1393.99	2211.65	1535.83	1565.54	1136.57	2117.27	1617.49	1589.45	1130.71	3039.07	2171.57	1730.69	1767.22	1565.09	1962.57	1651.48	1331.93	1444.9	1490.39	1396.36	2078.29	1253.21	1292.61	2463.7	1181.9	1780.71	1177.6	1797.32	1240.64	1312.64	1050.22	2040.21	1885.47	1677.42	1113.87	1685.84	1651.93	1605.77	1312.39	1532.22	1338.01
18	2274.37	1960.23	1340.32	2353.79	1754.68	1976.46	1346.93	2051.86	1406.95	2211.83	1525.62	1565.06	1131.53	2106.83	1610.95	1584.16	1133.14	3039.84	2185.87	1715.1	1758.56	1566.89	1952.88	1658.27	1329.09	1442.05	1492.81	1395.55	2079.64	1260.65	1293.4	2474.04	1181.19	1768.27	1178.31	1795.74	1244.08	1307.82	1045.25	2043.38	1884.08	1670.19	1109.57	1697.42	1648.89	1606.41	1317.25	1524.3	1334.95
19	2274.66	1961.96	1348.41	2352.67	1745.95	1983.17	1330.71	2053.51	1406.92	2206.97	1511.02	1567.86	1130.7	2103.34	1615.95	1580.78	1128.2	3039.09	2183.71	1723.96	1744.76	1586.33	1955.85	1664.38	1331.48	1436	1484.71	1396.62	2091.71	1246.62	1295.57	2469.11	1180.97	1769.88	1179.1	1792.84	1244.72	1315.14	1052.38	2046.55	1882.92	1665.74	1109.76	1691.5	1652.13	1594.13	1313.63	1513.61	1332.54
20	2280.99	1963.25	1348.73	2351.71	1746.7	1986.22	1322.32	2053.69	1415.36	2201.6	1508.39	1569.61	1120.55	2118.5	1616.99	1581.49	1137.82	3035.89	2181.98	1709.42	1750.61	1572.59	1956.29	1659.19	1333.18	1437.62	1496.75	1391.27	2096.23	1252.72	1299.69	2489.14	1181.27	1773.33	1177.6	1803.41	1246.28	1310.43	1046.68	2055.56	1884.91	1662.97	1106.1	1682.86	1658.51	1584.4	1312.82	1520.99	1332.3
21	2283.78	1970.31	1334.11	2346.77	1738.92	1989.14	1321.47	2058.19	1421	2202.65	1505.94	1566.17	1130.97	2112.41	1623.61	1586.68	1136.35	3027.22	2191.55	1712.07	1748.8	1592.07	1957.3	1661.34	1336.88	1433.06	1493.47	1393.05	2102.08	1252.42	1291.85	2488.48	1179.07	1760.19	1178.15	1807.59	1240.58	1313.76	1041.05	2055.92	1877.65	1665.56	1106.8	1674.74	1657.83	1585.93	1321.88	1518.36	1335.01
22	2278.88	1981.59	1336.61	2333.79	1752.5	1986.44	1315.93	2059.63	1434.16	2207.48	1493.01	1568.39	1126.1	2119.39	1617.93	1583.96	1143.28	3027.82	2201.3	1711.12	1745.81	1590.71	1954.5	1666.89	1320.24	1445.05	1486.26	1386.75	2108.16	1248.49	1304.83	2485.66	1174.68	1758.76	1184.02	1807.16	1244.77	1308.38	1050.42	2068.3	1894.04	1668.24	1104.24	1672.74	1664.24	1579.52	1316.42	1513.32	1327.34
23	2278.6	2005.18	1335.36	2338.78	1736.65	1975.88	1305.09	2058.17	1444.64	2209.41	1487.83	1566.95	1141.01	2113.18	1623.18	1586.24	1161.91	3019.04	2181.89	1708.08	1741.96	1583.79	1960.03	1679.04	1335.73	1440.52	1483.79	1383.39	2134.82	1246.61	1296.29	2484.94	1177.82	1753.9	1173.66	1819.36	1248.91	1307.4	1049.92	2059.03	1894.37	1672.44	1109.5	1671.73	1670.65	1570.34	1322.28	1502.54	1330.27
24	2288.17	2017.49	1332.54	2324.31	1730.23	1970.99	1302.7	2054.61	1445.09	2216.19	1483.86	1569.3	1123.91	2127.23	1616.27	1587.23	1168.16	3012.24	2188.62	1715.98	1738.95	1589.32	1958.41	1683.56	1326.14	1433.14	1483.61	1388.43	2140.44	1236.17	1295.35	2483.93	1178.04	1752.9	1176.26	1825.72	1245.08	1316.74	1040.35	2048.86	1893.41	1679.68	1109.59	1671.65	1664.32	1560.63	1324.45	1503.36	1331.41
25	2288.88	2015.27	1331.74	2318.74	1739.35	1971.18	1305.48	2062.92	1452.28	2207.48	1468.1	1572.31	1122.94	2128.48	1617.82	1592.82	1188.79	3022.3	2189.81	1716.51	1730.35	1589.58	1955.46	1693.38	1331.9	1442.76	1477.72	1408.69	2128.98	1244.05	1299.33	2483.32	1168.1	1742.08	1179.42	1835.99	1241.47	1311.87	1047.74	2050.96	1891.92	1671.76	1118.14	1675.34	1675.29	1563.85	1324.5	1507.16	1331.48
26	2285.85	2032.77	1333.03	2321.02	1727.91	1970.28	1291.92	2061.13	1452.03	2198.17	1467.23	1569.22	1124.38	2134.48	1617.67	1591.58	1195.13	3017.56	2190.32	1719.65	1722.64	1595.9	1954.92	1701.04	1332.81	1453	1483.44	1401.06	2162.65	1252.63	1298.97	2504.75	1175.68	1754.46	1180.44	1835.47	1254.79	1317.73	1038.85	2053.48	1889.66	1693.51	1108.32	1673.58	1684.83	1555.35	1320.42	1504.28	1344.47
27	2291.78	2038.33	1332.83	2315.98	1720.48	1968.07	1291.94	2051.33	1458.07	2199.87	1466.56	1566	1119.9	2123.52	1622.89	1581.36	1203.32	3017.33	2179.25	1714.57	1726.06	1600.93	1952.37	1710.96	1332.28	1450.59	1480.13	1393.99	2153.64	1247.8	1295.38	2501.54	1173.05	1745.46	1177.07	1837.58	1261.55	1320.54	1034.1	2049.61	1892.89	1694.61	1111.6	1676.79	1690.47	1558.19	1331.8	1501.34	1342.79
28	2297.37	2065.3	1337.84	2305.4	1727.48	1965.49	1297.12	2060.11	1470.12	2202.16	1461.25	1560.95	1133.11	2127.61	1615.61	1592.64	1219.44	3004.77	2180.92	1715.93	1720.44	1593.49	1948.89	1711.85	1340.9	1462.81	1490.8	1397.03	2161.87	1248.98	1303.5	2518.18	1178.63	1752.8	1177.26	1845.29	1270.35	1310.3	1029.49	2059.64	1894.72	1703.75	1103.06	1663.55	1697.72	1550.55	1329.2	1502.19	1350.13
29	2309.13	2061.93	1344.95	2309.67	1721.55	1973.13	1290.53	2061.9	1475.23	2199.1	1464.56	1557.57	1119.81	2127.34	1612.93	1593.52	1224.94	2996.47	2181.92	1722.54	1715.18	1604.27	1948.57	1718.67	1331.99	1482.75	1497.39	1402.23	2181.59	1268.07	1309.47	2523.27	1184.11	1751.06	1174.94	1852.51	1279.7	1312.47	1030.27	2058.83	1890.24	1695.62	1105.65	1678.59	1691.83	1545.03	1344.39	1502.3	1359.86
30	2304.25	2071.96	1333.78	2301.34	1719.34	1964.16	1287.33	2063.55	1471.45	2205.98	1466.86	1562.25	1126.67	2136.23	1614.31	1605.45	1218.5	2992.6	2179.54	1723.19	1715.75	1604.72	1947.76	1721.94	1335.3	1481.52	1502.1	1409.6	2192.46	1259.38	1297.93	2508	1176.16	1748.43	1170.03	1856.4	1286.41	1312.15	1034.68	2063.6	1885.35	1705.2	1099	1682.25	1700.1	1549.67	1353.24	1492.49	1364.98
31	2307.14	2078.07	1349.38	2281.42	1716.33	1969.74	1292.29	2062.15	1478.15	2200.78	1463.95	1572.17	1139.81	2129.55	1621.3	1604.86	1221.85	2997.33	2176.38	1716.03	1717.88	1601.11	1941.42	1726.53	1344.26	1479.84	1499.73	1412.55	2190.76	1253.89	1307.58	2517.37	1180.21	1749.37	1179.97	1858.51	1282.74	1311.89	1034.16	2066.94	1875.82	1706.79	1100.06	1690.66	1694.45	1545.15	1354.97	1501.26	1368.86
32	2304.8	2081.74	1349.07	2290.39	1724.23	1965.42	1292.97	2070.26	1481.85	2201.6	1473.85	1570.84	1136.63	2134.22	1620.72	1615.36	1217.47	2987.71	2167.59	1710.56	1716.04	1600.76	1942.81	1731.14	1341.85	1489.12	1512.09	1406.15	2197.34	1250.23	1300.81	2514.39	1175.12	1750.78	1171.66	1863.2	1288.99	1309.17	1030.4	2065.56	1876.72	1710.81	1101.21	1695.26	1697.95	1559.22	1361.53	1490.98	1380.44
33	2301.14	2073.41	1348.32	2284.77	1720.39	1969.87	1284.57	2063.33	1496.04	2209.19	1466.02	1573.13	1136.2	2115.41	1618.06	1620.99	1218.56	2977.55	2163.68	1724.43	1713.86	1606.15	1941.8	1741.14	1338.99	1495.01	1511.84	1413.6	2199.2	1252.33	1302.65	2522.42	1177.77	1759.7	1169.85	1868.34	1290.85	1301.89	1030.85	2065.68	1887.16	1708.05	1100.91	1699.87	1699.27	1554.61	1359.92	1488.54	1378.59
34	2296.98	2087.51	1351.41	2291.91	1735.44	1960.49	1299.24	2066.74	1487.28	2200.99	1468.46	1575.15	1143.61	2136.84	1616.72	1624.31	1227.61	2972.44	2165.19	1730.82	1730.48	1603.43	1932.28	1742.44	1340.97	1499.28	1512.61	1418.6	2202.97	1269.79	1304.29	2530.03	1181.2	1763.7	1171.41	1869.25	1300.89	1306.57	1019.48	2066.9	1884.72	1708.27	1100.59	1690.67	1700.37	1568.84	1348.8	1485.24	1394.02
35	2300.7	2085.14	1347.86	2287.05	1732.83	1976.27	1304.51	2076.61	1494.61	2215.33	1472.87	1570.53	1136.01	2120.9	1617.65	1632.31	1232.52	2967.49	2161.02	1728.24	1722	1601.29	1935.75	1742.53	1344.63	1503.34	1511.48	1421.94	2213.5	1273.92	1304.67	2543.76	1182.43	1755.15	1177.51	1874.63	1298.37	1299.79	1021.1	2068.05	1881.16	1711.48	1100.29	1703.88	1700.73	1565.1	1353.93	1485.12	1398.62
36	2305.37	2088.65	1348.39	2290.15	1732.59	1971.42	1295.4	2075.97	1497.14	2202.45	1475.91	1573.48	1148.1	2117.46	1620.78	1636.1	1231.8	2948.72	2153.13	1732.67	1711.3	1617.21	1937.1	1758.02	1351.85	1500.65	1526.21	1415.24	2221.62	1272.33	1306.84	2536.57	1185.99	1759.75	1172.28	1877.02	1305.02	1298.35	1019.79	2073.58	1886.07	1727.72	1101.64	1713.16	1709.27	1574.72	1362.34	1482.91	1409.78
37	2307.21	2086.74	1358.77	2286.58	1724.76	1968.02	1287.49	2082.44	1502.59	2215.17	1476.74	1580.43	1148.33	2112.86	1617.13	1642.64	1230.91	2950.75	2146.95	1740.73	1713.19	1616.83	1939.96	1743.92	1349.21	1509.71	1520.66	1412.32	2229.56	1261.91	1308.89	2533.44	1173.59	1757.3	1173.9	1872.75	1311.28	1297.49	1024.04	2081.08	1879.78	1712.51	1097.66	1710.3	1706.97	1586.65	1350.63	1475.26	1407.08
38	2302.5	2086.97	1361.55	2294.46	1727.81	1960.01	1297.23	2090.89	1506.06	2210.59	1487.77	1581.11	1151.64	2123.72	1605.78	1648.54	1242.03	2945.75	2145.39	1741.74	1715.77	1619.12	1933.93	1754.18	1354.18	1514.51	1516.33	1425.82	2228.25	1250.43	1311.37	2536.28	1171.44	1760.37	1169.29	1880.85	1321.98	1301.22	1019.48	2081.6	1883.33	1721.04	1103.98	1701.86	1706.91	1591.03	1352.36	1487.03	1410.22
39	2304.78	2093.92	1365.28	2298.8	1727.83	1960.93	1302.06	2095.82	1507.83	2221.04	1481.05	1584.37	1159.06	2121.37	1609.08	1653.88	1251.33	2940.38	2127.25	1738.87	1722.53	1618.38	1943.15	1768.09	1358.57	1516.75	1523.33	1430.2	2226.96	1246.71	1313.37	2538.11	1166.41	1761.04	1165.71	1886.05	1316.13	1294.35	1021.33	2084.71	1880.49	1722.61	1107.64	1723.43	1717.79	1589.02	1346.59	1481.3	1414.2
40	2305.12	2085.77	1377.26	2291.49	1735.43	1961.45	1302.55	2103.93	1505.78	2216.16	1485.45	1576.41	1153.9	2105.99	1615.13	1650.63	1251.44	2949.35	2130.51	1741.57	1710.63	1621.91	1945.3	1769.09	1354.38	1514.15	1512.4	1431.93	2245.78	1240.19	1313.84	2548.29	1173.38	1759.78	1163.18	1882.82	1317.67	1296.27	1022.04	2086.17	1883.44	1719.07	1103.41	1721.39	1707.56	1603.82	1343.04	1483.18	1413.84
41	2304.82	2095.18	1371.31	2299.03	1741.64	1965.62	1325.62	2097.68	1512.81	2219.85	1490.74	1584.07	1172.37	2119.5	1610.81	1655	1257.41	2950.19	2124.84	1740.17	1721.97	1614.09	1936.75	1774.43	1366.61	1522.18	1520.27	1431.11	2248.15	1239.76	1315.41	2544.7	1151.87	1766.52	1176.29	1887.99	1321.12	1299.22	1023.58	2096.93	1890.43	1719.22	1114.92	1733.64	1715.39	1611.81	1349.36	1485.72	1418.99
42	2308.79	2088.85	1380.7	2301.33	1746.81	1973.85	1319.02	2112.39	1512.14	2224.15	1498.17	1578.9	1171.99	2100.12	1610.26	1655.54	1271.73	2947.46	2113.02	1756.5	1720.77	1619.82	1943.81	1765.83	1364.8	1520.6	1522.69	1423.37	2259.03	1245.72	1321.23	2541.62	1160.61	1767.01	1172.14	1894.87	1315.39	1306.75	1016.17	2088.86	1894.15	1718.22	1101.93	1728.93	1709.21	1611.23	1345.37	1485.63	1424.47
43	2307.3	2096.16	1372.15	2317.99	1749.81	1977.66	1319.8	2106.79	1514.05	2220.18	1501.82	1577.78	1171.86	2114	1610.88	1670.06	1265.47	2949.4	2124.4	1768.97	1716.37	1619.53	1936.23	1774.64	1360.69	1529.8	1521.33	1420.91	2251.48	1258.84	1310.93	2540.94	1159.79	1769.96	1175.1	1899.34	1322.5	1307.88	1013.48	2090.37	1898.5	1726.92	1102.45	1733.71	1712.25	1614.3	1341.81	1484.8	1420.58
44	2299.93	2093.87	1374.26	2309.6	1758.1	1990.81	1313.82	2116.07	1526.28	2222.59	1496.03	1564.4	1184.14	2113.3	1608.71	1666.03	1276.54	2949.19	2117.57	1777.14	1714.24	1624.95	1935.15	1785.7	1363.62	1523.92	1523.42	1428.63	2257.08	1269.41	1310.66	2548.7	1163.09	1769.99	1172.33	1903.86	1321.78	1310.83	1014.21	2094.37	1912.8	1729.1	1102.55	1740.73	1719.31	1630.39	1334.94	1500.49	1430.44
45	2297.63	2098.77	1379.16	2322.4	1745.93	1984.93	1320.04	2116.05	1520.53	2221.26	1501.33	1561.35	1180.22	2113.9	1611.81	1677.15	1279.1	2957.41	2116	1776.11	1720.56	1627.43	1926.9	1790.05	1363.39	1532.97	1515.48	1427.78	2260.45	1247.81	1305.4	2545.8	1167.25	1780.71	1177.69	1906.18	1320.9	1312.03	1018.24	2093.04	1912.27	1727.57	1108.17	1747.76	1706.5	1636.14	1343.1	1504.14	1422.4
46	2309.27	2093.25	1381.09	2330.01	1747.24	2012.13	1316.17	2121.82	1526.44	2228.42	1496.37	1555.95	1191.8	2113.74	1602.69	1678.07	1284	2955.58	2116.52	1792.01	1716.67	1626.68	1922.01	1780.46	1364.64	1536.5	1515.81	1461.45	2227.9	1250.4	1323.76	2544.3	1156.83	1777.85	1175.34	1905.24	1321.82	1317.06	1019.1	2100.16	1921.32	1730.67	1099.44	1754.82	1707.16	1634.65	1343.71	1508.58	1436.22
47	2303.71	2104.43	1381.75	2326.91	1755.37	2018.33	1316.5	2131.99	1529.39	2226.38	1505.33	1554.52	1185.48	2121.94	1613.03	1679.34	1291.77	2961.83	2112.56	1787.51	1709.12	1628.15	1923.85	1791.92	1371.16	1544.79	1512.45	1436.23	2274.24	1234.74	1318.55	2549.55	1171.69	1780.2	1177.27	1906.12	1324.94	1322.81	1012.55	2094.47	1926.55	1731.74	1106.95	1763.37	1699.91	1647.94	1338.54	1517.26	1442.05
48	2312.6	2108.19	1380.83	2331.84	1759.97	2010.66	1316.64	2132	1538.14	2222.38	1508.91	1542.54	1189.18	2117.81	1609.94	1682.63	1296.99	2962.04	2112.3	1795.43	1713.18	1635.86	1922.22	1792.94	1365.16	1537.07	1519.76	1431.93	2276.24	1240.38	1314.13	2571.14	1168.68	1787.96	1177.2	1914.18	1329.7	1313.97	1007.22	2092.04	1954.36	1731.01	1108.32	1759.71	1697.5	1640.93	1339.73	1518.56	1437.98
49	2310.14	2103.98	1387.14	2337.3	1759.71	2031.98	1316.36	2126.27	1533.85	2226.97	1508.79	1531.98	1188.48	2111.63	1612.82	1689.14	1306.51	2960.14	2121.08	1805.61	1724.95	1633.2	1918.95	1797.89	1375.24	1546.96	1520.56	1450.32	2242.32	1255.95	1316.92	2568.05	1164.88	1789.44	1173.06	1921.04	1329.28	1321.46	1018.48	2089.67	1957	1738.72	1102.87	1765.86	1708.27	1651.02	1336.7	1529.77	1437.64
50	2306.31	2107.57	1389.62	2333.24	1760.46	2037.49	1321.98	2129.44	1531.8	2235.49	1520.32	1537.26	1203.79	2110.33	1605.01	1690.77	1313.05	2960.73	2117.21	1795.01	1715.4	1633.72	1923.78	1788.21	1374.3	1548.99	1526.22	1447.18	2278.37	1259.25	1314.2	2580.67	1159.53	1800.26	1180.5	1925.88	1325.04	1320.17	1017.57	2100.82	1974.91	1740.71	1101.75	1767.74	1707.71	1658.65	1340.98	1527.9	1439.31
51	2303.93	2118.71	1394.41	2342.2	1762.92	2042.42	1324.41	2121.93	1534.74	2229.08	1513.82	1531.92	1209.89	2113.19	1612.43	1694.61	1323.16	2955.82	2113.17	1827	1715.68	1642.77	1927.33	1793.16	1374.95	1548.42	1513.59	1443.53	2275.81	1250.55	1307.72	2578.64	1156.34	1795.86	1173.65	1930.95	1334.42	1315.89	1013.95	2087.38	1982.28	1734.95	1100	1764.57	1702.42	1655.77	1331.17	1531.56	1435.58
52	2303.67	2111.64	1401.54	2336.86	1763.07	2041.29	1322.55	2123.3	1549.11	2227.55	1507.77	1522.84	1204.08	2143.72	1604	1702.52	1334.18	2966.5	2110.38	1829.06	1714.64	1640.94	1935.33	1783.42	1377.76	1545.83	1510.21	1440.12	2279.78	1235.58	1305.84	2583.58	1152.79	1813.39	1187.69	1936.9	1337.64	1326.43	1014.47	2099.75	1987.45	1748.09	1098.26	1768.45	1715.33	1660.84	1348.08	1535.4	1444.66
53	2302.02	2116.97	1398.68	2327.27	1753.5	2060.57	1321.82	2119.08	1538.07	2233.26	1511.18	1528.36	1212.14	2118.01	1617.08	1704.43	1338.74	2967.2	2106.67	1823.21	1722.95	1649.17	1930.42	1789.12	1376.14	1554.01	1515.54	1441.84	2286.7	1220.64	1309.02	2591.88	1149.33	1824.68	1177.47	1930.86	1333.89	1332.91	1012.54	2096.32	1987.4	1754.6	1104.18	1758.52	1708.76	1658.14	1332.52	1524.64	1432.53
54	2296.07	2117.33	1401.74	2333.7	1760.38	2068.58	1326.94	2117.78	1524.39	2231.17	1514.02	1511.56	1200.66	2117.93	1602.89	1712.11	1339.96	2969.96	2103.7	1837.73	1718.74	1646.79	1938.96	1790.86	1383.14	1552.82	1514.24	1479.42	2259.8	1220.51	1305.97	2583.2	1141.8	1838.22	1179.16	1941.65	1339.16	1330.92	1010.14	2086.98	1996.21	1755.13	1102.26	1763.31	1708.43	1663.16	1346.15	1528.43	1431.09
55	2298.28	2111.71	1409.95	2339.62	1763.35	2055.55	1343.37	2139.39	1546.64	2225.02	1536.23	1516.8	1201.83	2147.34	1619.32	1711.63	1351.39	2972.88	2093.8	1849.05	1712.83	1660.99	1941.84	1775.01	1385.93	1542.31	1517.02	1456.41	2289.5	1222.96	1320.77	2604.8	1155.81	1841.04	1181.91	1941.39	1341.98	1328.09	1007.27	2088.1	1986.91	1733.11	1116.44	1756.67	1699.57	1663.32	1349.11	1524.26	1426.19
56	2287.73	2107.11	1405.65	2335.87	1765.74	2052.86	1333.24	2121.24	1534.94	2234.92	1526	1522.34	1202.63	2103.95	1626.31	1714.42	1352.3	2982.02	2094.12	1841.84	1720.3	1654.47	1936.51	1780.33	1387.71	1536.7	1513.36	1456.55	2295.64	1241.55	1310.75	2594.44	1147.82	1841.07	1185.15	1958.02	1349.08	1331.4	1016.37	2092.69	1995.59	1728.23	1105.4	1765.36	1715.21	1673.94	1362.69	1533.22	1432.39
57	2297.56	2104.57	1407.3	2333.41	1764.67	2064.37	1355.42	2123.07	1549.47	2233.62	1537.11	1515.83	1199.62	2138.46	1628.3	1720.48	1359.55	2978.03	2090.49	1854.21	1711.62	1659.78	1941.39	1776.82	1387.94	1543.59	1517.03	1458.63	2295.44	1249.78	1313.17	2593.34	1153.11	1848.92	1183.47	1957.66	1349.45	1339.05	1005.14	2089.56	2002.6	1735.16	1113.08	1769.88	1711.68	1669.71	1365.91	1526.94	1426.88
58	2286.94	2106.31	1413.88	2329.18	1775.33	2061.05	1347.1	2110.51	1541.33	2232.81	1536.55	1514.35	1203.29	2116.52	1629.97	1723.2	1364.28	2975.36	2097.04	1849	1714.64	1660.52	1949.42	1780.71	1392.83	1538.51	1509.78	1468.1	2293.65	1263.15	1310.15	2595.84	1154.28	1843.26	1186.98	1961.46	1352.08	1338.75	1009.2	2086.62	2016.15	1721.26	1112.68	1764.54	1711.51	1669.78	1362.59	1529.93	1425.82
59	2277.16	2101.25	1407.06	2337.06	1773.46	2065.92	1341.92	2115.11	1540.25	2233.05	1545.46	1524.15	1210.47	2129.28	1626.59	1728.37	1370.58	2984.94	2085.62	1874.77	1736.56	1640.69	1949.62	1782.68	1385.2	1535.97	1508.72	1466.53	2291.79	1269.84	1317.32	2602.05	1157.23	1860.35	1192.25	1962.57	1360	1333.93	1013.82	2085.09	2015.13	1741.04	1106.86	1754.08	1715.44	1684.59	1367.35	1527.36	1429.11
60	2281.21	2092.93	1406.32	2337.57	1769.28	2057.02	1347.49	2126.57	1550.81	2235.07	1553.8	1510.58	1202.76	2153.43	1636.62	1740.68	1371.03	2989.98	2088.69	1865.37	1723.77	1647.41	1959.31	1783.3	1394	1529.45	1526.13	1469.22	2294.2	1281.93	1309.83	2598.55	1157.4	1864.84	1191.04	1966.89	1361.4	1336.98	1009.56	2085.04	2013.58	1737.95	1118.32	1755.92	1708.37	1681.09	1363.87	1528	1428.21
[truncated: 108 more columns]

## Sheet: Lat 20180517 1 and 0
	1	1	2	2	2	2	3	3	3	4	6	6	3	3	3	3	4	4	4	4	4	4	4	4	4	8	8	11	11	11		1	1	2	2	2	2	3	3	3	4	6	6	3	3	3	3	4	4
	1	6	2	3	4	5	2	5	7	7	1	5	5	6	7	9	1	2	3	7	8	9	10	12	13	5	6	1	2	7		1	6	2	3	4	5	2	5	7	7	1	5	5	6	7	9	1	2
0	1578.67	1782.03	1417.5	1977.97	1305.51	1764.5	1184.67	1894.03	1693.15	1476.44	1672.96	1351.05	1595.83	1524.34	1353.82	1318.11	2605.81	1556.78	2152.55	1769.16	2124.15	1513.79	1311.83	1648.15	2080.06	1566.91	3262.13	1440.49	1259.38	2699.67		100	100	100	100	100	100	100	100	100	100	100	100	100	100	100	100	100	100
1	1571.91	1782.17	1409.29	1977.86	1296.89	1755.28	1212.85	1884.3	1794.51	1471.66	1662.37	1325.04	1590.54	1522.48	1347.03	1293.2	2602.59	1558.22	2146.34	1766.12	2100.84	1511.05	1328.42	1648.3	2053.92	1527.03	3270.23	1431.76	1259.64	2700.78		99.5714	99.7978	99.4214	101.28	99.3396	99.4773	102.379	99.4864	96.5086	99.4442	99.3674	98.0748	99.6688	99.8779	99.4987	98.1097	99.8762	100.714
2	1588.79	1778.57	1405.45	2003.18	1286.64	1721.81	1168.18	1882.88	1731.86	1481.56	1672.89	1319.6	1563.86	1537.03	1346.91	1275.94	2601.71	1574.1	2162.31	1748.91	2082.66	1517.74	1298.81	1643.42	2068.74	1603.09	3268.75	1412.76	1247.5	2679.35		100.641	98.9264	99.1503	101.837	98.5544	97.5807	98.6078	99.4112	96.2337	98.3831	99.9963	97.6726	97.9965	100.832	99.4893	96.8003	99.8424	101.443
3	1589.65	1763.04	1394.7	2014.19	1272.31	1706.96	1176.3	1853.76	1726.92	1486.91	1668.44	1312.93	1550.25	1572.19	1341.02	1274.53	2541.19	1585.34	2146.22	1751.53	2071.49	1521.93	1308.67	1638.37	2037.31	1528.27	3247.16	1418.63	1258.14	2698.07		100.696	98.0376	98.3914	102.73	97.457	96.7391	99.2933	97.8742	97.1224	98.4842	99.7302	97.1789	97.1439	103.139	99.0548	96.6933	97.52	99.6206
4	1559.87	1747.2		2031.84	1277.78	1724.18	1198.77	1859.08	1742.87	1469.56	1666.48	1307.47	1549.07	1524.43	1359.2	1250.4	2529.19	1596.82	2130.94	1747.61	2061.85	1522.94	1316.71	1627.84	2039.55	1537.7	3261.74	1410.81	1266.2	2669.35		98.809	98.5181		103.159	97.876	97.7149	101.19	98.1548	96.5643	98.3164	99.6127	96.7747	97.0701	100.006	100.397	94.863	97.0595	98.9092
5	1553.62	1755.76	1388.19	2040.34	1261.11	1700.03	1140.6	1843.92	1732.86	1461.39	1679.66	1296.94	1539.34	1529.15	1340.39	1249.04	2553.17	1568.13	2145.8	1739.58	2066.87	1510.41		1628.13	2031.64	1537.19	3258.52	1395.96	1271.12	2666.45		98.4131	97.9861	97.9327	104.05	96.5987	96.3464	96.2798	97.3542	97.9859	99.6265	100.401	95.9954	96.4602	100.315	99.0081	94.7597	97.9798	98.5639
6	1550.93	1746.28	1377.18	2057.96	1248.23	1689.08	1146.55	1835.35	1758.37	1445.79	1685.72	1311.59	1546.32	1512.37	1355.04	1230.36	2525.71	1556.93	2128.23	1744.38	2080.1	1507.04	1331.08	1610.69	2019.04	1512.62	3247.86	1400.95	1273.71	2683.29		98.2428	97.4845	97.1555	106.365	95.6121	95.726	96.7823	96.9018	96.9557	98.6188	100.763	97.0795	96.8974	99.2147	100.09	93.3427	96.926	98.351
7	1552.16	1737.34	1363.37	2103.75	1257.74	1675.45	1135.33	1830.98	1739.88	1447.28	1673.98	1314.95	1534.74	1515.16	1336.79	1230.03	2522.31	1551.49	2109.15	1733.43	2036.77	1506.33	1329.45	1604.69	2011.3	1538.07	3258.67	1392.71	1265.91	2667.76		98.3206	97.6706	96.1817	108.199	96.3412	94.9533	95.8349	96.6714	97.8416	99.1311	100.061	97.328	96.1719	99.3977	98.7425	93.3178	96.7955	99.2741
8	1540.71	1740.66	1365.47	2140.02	1274.42	1661.32	1113.72	1820.78	1755.78	1444.81	1668.63	1300.36	1549	1508.8	1363.65	1229.46	2481.48	1548.14	2107.91	1736.09	2045.55	1518.48	1347.67	1597.13	2005.6	1508.38	3279.28	1392.72	1300.21	2651.61		97.5949	98.1465	96.33	109.086	97.6188	94.1526	94.0108	96.1329	97.7443	98.5612	99.7415	96.2484	97.0657	98.9804	100.726	93.2742	95.2287	99.002
9	1553.29	1749.14	1346.4	2157.56	1257.82	1648.6	1106.18	1824.55	1754.03	1464.07	1665.02	1321.03	1509.57	1503.78	1361.98	1228.24	2500.36	1562.67	2117.97	1731.99	2039.67	1499.91	1353.35	1612.33	2000.03	1509.89	3266.19	1386.79	1260.3	2658.11		98.3923	98.5729	94.9847	110.22	96.3468	93.4319	93.3744	96.3317	98.2369	98.6471	99.5257	97.7784	94.5943	98.6508	100.603	93.1816	95.9531	99.4178
10	1550.49	1756.74	1343.42	2179.99	1241.83	1646.05	1104.45	1870.43	1762.87	1449.26	1650.42	1313.08	1497.79	1505.34	1378.38	1270.03	2487.86	1558.39	2103.36	1713.53	2046.79	1511.25	1355.46	1607.82	1997.98	1489.66	3271.69	1385.59	1253.42	2650.62		98.215	98.9492	94.7741	111.445	95.1225	93.2872	93.2282	98.7541	98.4394	99.888	98.6528	97.1899	93.8566	98.7532	101.814	96.3518	95.4733	99.7271
11	1548.26	1763.45	1337.59	2204.22	1253.6	1652.83	1105.43	1855.98	1766.51	1456.79	1651.45	1309.85	1484.28	1503.3	1378.3	1217.83	2476.75	1564.94	2138.68	1708.92	2035.23	1497.88	1344.79	1589.33	1990	1538.8	3275.84	1388.77	1248.36	2648.76		98.0732	99.7262	94.3631	111.959	96.0236	93.6714	93.3109	97.9912	97.6127	99.0947	98.7147	96.9507	93.0099	98.6195	101.808	92.3923	95.047	98.5293
12	1537.87	1777.29	1334.59	2214.38	1246.87	1643.44	1104.05	1845.53	1751.67	1448.41	1651.49	1325.85	1477.86	1508.65	1400.23	1215.56	2479.12	1569.81	2088.8	1705.76	2013.66	1503.96	1399.57	1590.94	1995.83	1502.73	3272.44	1380.45	1237.56	2660.26		97.4154	98.5845	94.1513	111.552	95.5081	93.1393	93.1948	97.4396	97.946	99.1813	98.7168	98.1347	92.6075	98.9706	103.428	92.2196	95.1379	99.8074
13	1534.24	1756.95	1326.78	2206.34	1257.37	1630.69	1094.13	1833.48	1757.65	1449.67	1647.13	1336.1	1474.82	1509.2	1419.62	1208.03	2468.99	1550.95	2079.6	1704.34	2025.43	1505.12	1363.67	1601.8	1995.38	1500.62	3266.79	1367.13	1303.37	2663.77		97.1852	98.4253	93.6001	112.803	96.3126	92.4165	92.3576	96.8032	97.4731	99.913	98.4563	98.8938	92.417	99.0066	104.86	91.6481	94.7492	99.8084
14	1533.47	1754.11	1324.11	2231.09	1246.67	1634.47	1092.36	1842.28	1749.17	1467.91	1638.84	1336.68	1494.84	1512.82	1414.17	1201.1	2447.11	1571.07	2080.9	1703.17	2010.44	1526.57	1380.11	1590.56	1986.35	1484.12	3250.33	1364.27	1276.58	2636.57		97.1363	98.4661	93.4117	113.363	95.4929	92.6306	92.2082	97.2677	98.0965	100.196	97.9608	98.9363	93.6717	99.2439	104.458	91.1227	93.9098	99.2038
15	1534.02	1754.84	1323.64	2242.15	1263.77	1645.34	1082.63	1843.13	1760.35	1456.25	1634.12	1365.7	1461.94	1518.36	1417.98	1225.31	2448.85	1571.09	2063.79	1702.7	2005.14	1516.45	1383.06	1589.88	1990.94	1491.6	3259.95	1356.01	1274.65	2646.97		97.1715	98.1534	93.3787	112.752	96.803	93.2471	91.3867	97.3128	96.4065	100.616	97.6788	101.085	91.61	99.6077	104.739	92.9591	93.9764	98.9135
16	1533.26	1749.26	1315.59	2230.06	1255.96	1639.19	1096.18	1855	1730.03	1457.52	1636.09	1352.45	1446.46	1510.81	1419.51	1198.78	2447.87	1561.57	2055.84	1695.46	1970.83	1515.15	1378.09	1581.88	1970.66	1483.36	3262.88	1353	1286.17	2655.96		97.123	97.3768	92.8106	112.197	96.2049	92.8981	92.53	97.9394	97.3942	100.832	97.7962	100.104	90.6402	99.1124	104.852	90.9464	93.9389	99.0886
17	1532.17	1735.42	1335.7	2219.09	1259.44	1642.08	1088.51	1844.39	1747.75	1468.28	1633.75	1358.56	1432.51	1514.53	1432.67	1186.8	2444	1557	2080.66	1695.31	1978.05	1534.43	1391.6	1584.02	1996.47	1477.17	3255.34	1347.17	1294.28	2663.18		97.0545	97.8167	94.2296	110.086	96.4708	93.0621	91.8829	97.3795	95.7887	102.376	97.6566	100.556	89.7657	99.3563	105.825	90.0376	93.7904	98.9282
18	1540.54	1743.26	1333.91	2177.34	1267.88	1641.48	1111.38	1857.55	1718.94	1472.43	1636.38	1376.81	1434.71	1527.08	1431.12	1184.83	2434.7	1559.75	2082.07	1708.61	1960.99	1506.75	1392.99	1582.14	1951.9	1488.88	3258.48	1351.68	1286.83	2647.77		97.5842	96.8532	94.1033	109.016	97.1172	93.028	93.8133	98.0741	96.3004	103.746	97.8137	101.907	89.9033	100.18	105.71	89.8884	93.4335	98.8256
19	1547.31	1726.09	1329.88	2156.17	1253.7	1647.74	1114.42	1869.63	1728.12	1478.61	1630.26	1388.38	1438.23	1523.43	1439.81	1174.78	2400.98	1557.23	2065.93	1705.41	1966.46	1502.43	1408.34	1576.71	1946.26	1506.16	3262.22	1355.65	1290.49	2663		98.0131	96.459	93.8191	108.007	96.0312	93.3832	94.0704	98.7118	96.9614	105.076	97.4479	102.763	90.1242	99.9403	106.352	89.1261	92.1392	99.3946
20	1547.39	1719.07	1339.26	2136.21	1257.04	1642.14	1107.48	1848.41	1739.98	1481.78	1627.61	1389.04	1406.19	1526.56	1437.79	1170.71	2408.06	1555.61	2069.1	1709.21	1954.49	1484.3	1420.7	1569.46	2000.14	1488.05	3262.44	1337.02	1291.15	2704.55		98.0182	95.7797	94.4809	107.097	96.287	93.0656	93.4838	97.5916	94.9986	106.138	97.2894	102.812	88.1165	100.145	106.202	88.817	92.4111	99.7589
21	1541.9	1706.96	1329.26	2118.22	1258.06	1648.29	1112.39	1839.41	1704.76	1504.47	1623.73	1393.94	1399.94	1524.24	1447.69	1151.05	2402.79	1564.57	2063.88	1704.35	1951.55	1485.07	1438.31	1572.57	1951.65	1505.21	3271.91	1336.36	1291.04	2681.32		97.6706	95.3663	93.7752	107.221	96.3651	93.4139	93.8985	97.1161	96.7985	106.69	97.0574	103.175	87.7251	99.9934	106.934	87.3255	92.2089	100.356
22	1561.52	1699.59	1331.99	2120.69	1260.06	1652.74	1126.04	1862.93	1737.06	1524.6	1622.98	1391.84	1397.1	1530.97	1447.38	1156.6	2405.56	1570.31	2075.83	1709.22	1970.92	1488.85	1438.25	1576.65	1941.76	1504.46	3279.19	1318.72	1291.3	2706.48		98.9136	94.9448	93.9675	107.054	96.5186	93.6662	95.0511	98.3581	95.3477	106.943	97.0125	103.019	87.5469	100.435	106.911	87.747	92.315	99.5692
23	1569.01	1692.08	1326.32	2117.37	1255.65	1645.18	1137.73	1864.87	1711.02	1544.15	1615.66	1388.47	1396.87	1542.92	1458.41	1155.82	2408.55	1579.71	2078.25	1707	1938.15	1489.08	1445.22	1559.46	1946.38	1511.24	3278.29	1326.79	1292.27	2713.99		99.3876	95.0645	93.5681	106.185	96.1808	93.2379	96.0375	98.4607	95.0344	108.144	96.5752	102.77	87.5327	101.218	107.726	87.6873	92.4299	99.4573
24	1551.83	1694.22	1312.8	2100.19	1251.09	1654.89	1136.67	1847.57	1705.4	1559.76	1614.22	1395.37	1393.97	1546.38	1464.62	1161.96	2421.15	1567.32	2074.25	1637.1	1945.99	1497.62	1462.03	1555.4	1932.71	1511.09	3284.66	1342.17	1291.8	2718.77		98.2994	94.9438	92.6139	106.601	95.8316	93.788	95.9481	97.5472	95.0226	108.022	96.4893	103.281	87.3508	101.446	108.184	88.1536	92.9133	99.728
25	1556.25	1692.06	1326.5	2108.41	1248.97	1642.83	1136.34	1869.11	1705.19	1567.88	1606.99	1400	1381.31	1548.59	1438.66	1149.99	2429.28	1565.56	2063.35	1629.52	1927.22	1498.82	1466.88	1551.13	1932.8	1502.83	3293.56	1330.51	1286.56	2784.46		98.5794	93.333	93.5803	106.63	95.6693	93.1049	95.9201	98.6847	95.3765	107.754	96.0572	103.624	86.5577	101.59	106.267	87.2456	93.2252	99.5764
26	1555.04	1663.36	1327.6	2108.99	1241.22	1642.55	1130.46	1860.64	1711.54	1571.59	1609.41	1410.81	1381.74	1550.77	1439.31	1148.66	2427.25	1569.82	2074.34	1645.89	1935.97	1521.07	1464.13	1552.97	1945.53	1512.5	3293.59	1332.7	1302.98	2764.83		98.5026	94.0282	93.6581	106.155	95.0753	93.0889	95.4237	98.2375	94.8034	108.183	96.2017	104.423	86.5845	101.734	106.315	87.1442	93.1477	99.6504
27	1543.53	1675.75	1314.19	2099.6	1247.82	1644.15	1140.58	1866.01	1701.26	1589.24	1605.58	1411.23	1395.92	1563.83	1431.02	1142.46	2437.15	1567.43	2057.91	1647.84	1928.97	1495.78	1476.05	1552.84	1927.24	1501.04	3298.35	1306.27	1296.07	2750.67		97.7738	92.8811	92.7118	106.675	95.5811	93.1795	96.2779	98.521	94.0681	109.219	95.9728	104.455	87.473	102.59	105.702	86.6735	93.5276	99.8344
28	1556.73	1655.3	1324.6	2109.87	1243.22	1648.35	1136.3	1881.52	1688.06	1587.44	1609.48	1403.1	1399.01	1575.4	1428.59	1137.46	2434.29	1568.6	2061.38	1639.51	1930.45	1502.55	1481.2	1558.11	1926.12	1504.35	3296.06	1333.77	1286.33	2775.01		98.6102	93.2616	93.4467	106.283	95.2287	93.4176	95.9169	99.3399	93.3397	110.023	96.206	103.853	87.6668	103.349	105.523	86.2945	93.4178	99.6508
29	1547.58	1662.08	1324.86	2102.12	1252.78	1655.17	1142.65	1886.44	1674.99	1583.5	1597.89	1407.34	1406.61	1575.32	1427.02	1141.71	2452.34	1571.49	2067.59	1647.31	1930.27	1513.92	1487.93	1560.41	1946.04	1541.18	3308.77	1322.02	1304.42	2783.9		98.0305	92.6814	93.4648	106.728	95.9613	93.8042	96.4526	99.5993	92.7702	111.286	95.5128	104.167	88.1426	103.344	105.407	86.6167	94.1105	100.775
30	1557.57	1651.74	1327.01	2110.92	1254.4	1672.64	1135.44	1891.35	1664.77	1589.8	1587.28	1419.39	1426.66	1577.13	1429.3	1141.82	2444.33	1568.6	2063.15	1641.49	1930.39	1510.1	1487.57	1566.62	1922.26	1536.86	3322.56	1356.4	1284.6	2747.32		98.6631	93.0947	93.6163	107.037	96.085	94.7943	95.8445	99.8588	93.0859	112.656	94.8787	105.059	89.3989	103.463	105.575	86.6254	93.8029	100.56
31	1568.64	1659.11	1324.47	2117.04	1254.85	1673.35	1146.81	1880.09	1670.44	1605.04	1589.47	1415.07	1420.42	1583.54	1407.54	1140.95	2449.52	1586.3	2065.28	1640.93	1918.75	1514.31	1495.85	1596.55	1923.3	1532.67	3319.4	1315.13	1300.01	2770.38		99.3642	92.1851	93.4371	108.162	96.1199	94.8344	96.8037	99.2642	91.976	113.036	95.0097	104.739	89.0082	103.883	103.968	86.5597	94.0019	100.384
32	1575.3	1642.9	1320.33	2139.29	1244.73	1669.08	1148.17	1879.42	1650.52	1616.86	1585.89	1408.14	1442.36	1592.18	1419.19	1132.44	2459.93	1582.91	2067.83	1658.26	1922.67	1513.26	1484.62	1614.87	1916.45	1531.92	3316.52	1310.79	1293.07	2762.56		99.7865	92.1654	93.1451	108.633	95.3443	94.5924	96.919	99.2286	91.5598	110.622	94.7954	104.226	90.383	104.45	104.829	85.914	94.4015	100.645
33	1563.28	1642.55	1328.64	2148.61	1234.18	1674.07	1155.78	1910.27	1643.05	1635.41	1582.78	1412.17	1427.11	1592.47	1416.81	1134.21	2460.75	1580.15	2072.03	1646.75	1925.55	1517.16	1504.3	1614.73	1942.31	1534.45	3336.45	1319.72	1284.5	2786.29		99.0249	92.0162	93.7317	109.617	94.5362	94.8752	97.5615	100.858	91.2314	110.6	94.6098	104.524	89.4276	104.469	104.652	86.0484	94.4331	100.491
34	1558.9	1639.89	1324.52	2168.06	1226.44	1678.24	1157.07	1906.59	1637.16	1655.54	1573.56	1418.61	1433.45	1596.67	1420.26	1137.23	2468.71	1584.25	2066.86	1663.36	1948.69	1520.54	1503.19	1631.06	1936.26	1552.12	3365.79	1318.74	1281.58	2795.31		98.7471	92.1921	93.4405	109.386	93.9433	95.1116	97.6704	100.663	90.9073	110.86	94.0585	105.001	89.825	104.745	104.908	86.2773	94.7384	99.3941
35	1558.56	1643.02	1326.79	2163.49	1227.62	1665.35	1163.79	1908.47	1631.34	1661.13	1569.13	1412.04	1444.85	1600.05	1448.06	1139.58	2474.73	1581.83	2049.2	1668.33	1930.51	1517.4	1516.4	1632.65	1951.35	1537.96	3348.78	1316.73	1285.36	2808.94		98.7261	91.664	93.601	109.773	94.0337	94.3809	98.2373	100.763	90.6055	110.487	93.7942	104.515	90.5393	104.967	106.961	86.4556	94.9695	99.5607
36	1569.62	1633.61	1323.09	2171.16	1232.17	1665.55	1157.65	1898.4	1625.93	1625.65	1562.26	1401.85	1445.17	1600.64	1413.19	1140.71	2473.69	1564.56	2048.91	1662.64	1937.26	1535.86	1523.71	1650.06	1933.82	1543.42	3338.44	1305.46	1279.29	2805.62		99.4263	91.9977	93.3397	110.602	94.3821	94.3924	97.7187	100.231	90.8769	109.935	93.3835	103.761	90.5589	105.005	104.386	86.5414	94.9295	99.8138
37	1583.65	1639.56	1323.91	2187.55	1231.84	1672.62	1169.91	1922.46	1630.8	1625.33	1564.24	1403.25	1453.64	1611.21	1410.73	1143.54	2486.28	1567.19	2053.66	1653.92	1935.32	1516.57	1539.15	1654.12	1948.79	1558.66	3332.63	1317.96	1292.22	2831.72		100.315	92.2412	93.3976	110.94	94.3568	94.793	98.7542	101.501	90.7593	110.417	93.5013	103.864	91.0899	105.699	104.204	86.7555	95.4129	100.621
38	1578.19	1643.9	1321.55	2194.22	1225.88	1667.38	1173.42	1922.92	1628.69	1629.15	1562.02	1403.09	1458.22	1614.17	1414.78	1154.7	2489.67	1571.17	2033.28	1667.89	1937.84	1523.04	1513.24	1655.08	1941.08	1545.98	3339.72	1314.56	1282.89	2860.99		99.9693	92.5942	93.2314	110.723	93.9005	94.4961	99.0505	101.525	90.0857	109.629	93.3688	103.852	91.3772	105.893	104.503	87.6023	95.5429	100.552
39	1576.07	1650.19	1323.34	2189.94	1228.35	1645.24	1171.92	1912.84	1616.6	1623.67	1558.9	1409.1	1504.97	1611.79	1417.05	1136.27	2492.61	1583.88	2051.73	1683.59	1947.37	1535.16	1523.6	1659.02	1949.29	1539.23	3332.91	1311.61	1284.67	2862.9		99.8351	92.5561	93.3572	112.059	94.0898	93.241	98.924	100.993	90.6303	109.492	93.1824	104.297	94.3064	105.737	104.67	86.2039	95.6559	100.761
40	1575.36	1649.51	1320.34	2216.36	1230.53	1661.29	1174.25	1909.54	1626.37	1615.56	1562.18	1397.94	1468.54	1617.22	1421.77	1141.08	2497.78	1582.79	2048.41	1697.72	1928.57	1522.02	1523.68	1644.27	1962.57	1543.28	3340.3	1323.22	1284.38	2882.73		99.79	92.6264	93.1457	112.091	94.2564	94.1509	99.1205	100.819	91.0088	109.153	93.3786	103.471	92.0234	106.093	105.019	86.5689	95.8542	100.986
41	1583.83	1650.76	1315.27	2216.99	1218.85	1664	1176.92	1909.95	1633.16	1622.63	1545.32	1395.24	1481.12	1622.43	1414.95	1147.84	2517.42	1586.08	2038.05	1704.03	1957.67	1511.25	1541.76	1648.37	1954.57	1566.51	3350.74	1308.56	1289.14	2878.57		100.327	92.677	92.7884	112.76	93.3619	94.3047	99.3455	100.841	90.2853	108.996	92.3708	103.271	92.8121	106.435	104.516	87.0821	96.608	101.036
42	1584.68	1651.67	1330.31	2230.22	1234.46	1661.97	1171.71	1919.18	1620.18	1611.05	1534.79	1390.91	1477.74	1629.77	1409.05	1142.68	2524.89	1589.62	2045.39	1693.79	1954.78	1516.79	1536.24	1666.47	1946.09	1551.71	3332.77	1301.29	1282.16	2877.68		100.38	92.5442	93.8492	112.567	94.5576	94.1891	98.9059	101.328	90.5397	109.188	91.7412	102.951	92.5999	106.916	104.08	86.6906	96.8946	100.681
43	1577.83	1649.3	1323.27	2226.41	1229.75	1645.73	1183.59	1909.99	1624.75	1609.04	1546.9	1401.89	1492.57	1622.05	1404.06	1149.14	2533.92	1590.4	2053.77	1702.39	1969.89	1514.78	1530.11	1667.88	1957.47	1545.21	3315.14	1307.4	1269.19	2862.03		99.9462	92.553	93.3526	112.204	94.1966	93.269	99.9089	100.843	90.6495	108.773	92.4651	103.763	93.5296	106.41	103.711	87.1808	97.2409	99.5079
44	1626.71	1649.45	1324.53	2219.24	1208.17	1647.17	1189.25	1896.5	1626.72	1604.06	1538.45	1379.65	1492.06	1626.36	1398.34	1147.94	2542.27	1584.82	2049.84	1715.43	1974.53	1511.35	1548.33	1681.48	1967.88	1541.33	3322.22	1314.39	1259.01	2857.3		103.043	92.6088	93.4415	111.99	92.5435	93.3504	100.386	100.13	90.6118	107.31	91.96	102.117	93.4971	106.692	103.288	87.0895	97.5613	105.771
45	1569.71	1650.45	1320.25	2215	1216.3	1644.63	1176.26	1900.21	1626.04	1601.75	1532.08	1374.24	1492.35	1619.38	1398.5	1155.53	2530.23	1566.35	2067.05	1727.15	1979.31	1509.32	1532.04	1665.76	1957.68	1563.3	3320.41	1311.36	1279.39	2863.08		99.4322	92.7376	93.1393	112.569	93.1665	93.2064	99.2903	100.327	90.5153	106.802	91.5789	101.716	93.5158	106.234	103.301	87.6656	97.0994	100.588
46	1578.3	1652.75	1325.61	2226.46	1231.25	1647.72	1186.02	1894.23	1624.31	1604.58	1539.63	1376.1	1493.59	1607.48	1394.22	1157.74	2545.92	1664.95	2060.9	1732.38	1994.49	1522.45	1551.31	1664.87	1970.2	1563.45	3301.7	1315.1	1300.2	2869.67		99.9764	93.2936	93.5174	112.612	94.3121	93.3817	100.113	100.011	90.574	106.52	92.0304	101.854	93.5931	105.454	102.984	87.8329	97.7014	101.003
47	1586.07	1662.65	1343.31	2227.3	1226.04	1651.13	1182.48	1903.94	1625.36	1598.49	1526.74	1386.06	1494.86	1608.1	1396.81	1166.79	2543.04	1583.36	2063.08	1747.68	2007.5	1514.13	1556.2	1662.82	1967.72	1575.36	3311.19	1333.12	1310.39	2883.7		100.469	92.9805	94.7663	112.927	93.9125	93.5748	99.815	100.524	90.0539	106.509	91.2602	102.592	93.6726	105.495	103.175	88.5199	97.591	101.094
48	1597.04	1657.07	1348.81	2233.53	1219.67	1651.08	1185.24	1900.26	1616.03	1576.98	1540.24	1384.57	1505.55	1609.81	1395.08	1157.2	2550.6	1589.89	2059.26	1744.53	2012.86	1516.61	1541.42	1675.12	1967.9	1560.63	3294.31	1321.13	1346.33	2896.45		101.164	93.1838	95.1545	112.906	93.4248	93.5723	100.048	100.329	90.1143	105.984	92.0672	102.482	94.3426	105.607	103.048	87.7924	97.8811	100.775
49	1604.41	1660.7	1355.39	2233.12	1213.33	1646.49	1176.53	1900.62	1617.11	1569.51	1530.24	1380.02	1509.78	1598.86	1403.95	1167.04	2555.52	1591.32	2076.68	1765.68	2016.96	1517.02	1540.43	1666.31	1983.46	1574.44	3293.2	1302.52	1337.26	2887.5		101.63	93.8068	95.6186	113.52	92.9392	93.3119	99.3131	100.348	89.824	105.747	91.4692	102.145	94.6077	104.889	103.703	88.5389	98.0701	100.92
50	1615.16	1671.8	1352.9	2245.27	1230.03	1648.61	1190.59	1904.65	1611.9	1565.38	1527.18	1376.74	1512.12	1592.63	1394.91	1168.96	2556.49	1586.3	2082.37	1766.92	2058	1523.79	1539.11	1674.62	1977.44	1565.37	3293	1325.94	1347.92	2906.35		102.311	93.4378	95.443	112.58	94.2185	93.4325	100.5	100.561	90.0781	105.113	91.2861	101.902	94.7542	104.48	103.035	88.6846	98.1072	100.98
51	1620.56	1665.22	1356.24	2226.67	1219.97	1650.1	1177.49	1890.59	1616.46	1565.2	1522.53	1380.92	1525.03	1591.52	1403.8	1176.49	2590.69	1588.58	2095.93	1771.74	2069.06	1524.85	1543.25	1671.4	1986.59	1571.57	3305.81	1312.22	1358.36	2907.26		102.653	93.5228	95.6783	113.056	93.4477	93.5164	99.3942	99.8186	90.4564	104.743	91.0081	102.211	95.5632	104.407	103.692	89.256	99.4197	101.818
52	1640.98	1666.74	1366.55	2236.09	1225.33	1647.74	1191.93	1907.9	1623.25	1557.49	1510.86	1390.18	1517.36	1583.99	1406.49	1185.97	2581.18	1589.52	2104.43	1776.73	2077.21	1513.41	1546.24	1670.07	1984.83	1578.42	3295.63	1333.16	1385.84	2922.22		103.946	93.8238	96.4061	114.267	93.858	93.3829	100.613	100.733	90.4255	103.994	90.3107	102.896	95.0826	103.913	103.891	89.9751	99.0546	99.9855
53	1631.43	1672.1	1370.79	2260.03	1203.36	1657.03	1184.7	1899.13	1622.7	1554	1516.17	1380.92	1520.82	1586.8	1389.82	1196.95	2586.76	1602.72	2118.38	1782.87	2086.15	1541.54	1533.5	1671.98	1993.15	1575.17	3288.77	1328.49	1380.04	2925.03		103.342	94.0044	96.7049	113.755	92.1753	93.9094	100.003	100.27	90.007	104.027	90.6282	102.211	95.2998	104.097	102.659	90.8082	99.2686	100.567
54	1613.66	1675.32	1379.71	2249.91	1204.92	1655.49	1185.3	1887.57	1615.19	1544.7	1513.88	1389.61	1526.96	1578.8	1396.73	1196.01	2595.17	1573.87	2130.67	1786.7	2101.01	1528.85	1537.34	1678.34	1987.73	1575.45	3354	1320.67	1386.38	2886.07		102.216	93.7175	97.3346	113.965	92.295	93.8224	100.053	99.6592	89.2936	103.617	90.4916	102.854	95.6842	103.573	103.169	90.7366	99.5915	99.829
55	1634.27	1670.21	1383.81	2254.06	1201.51	1657.6	1196.51	1889.1	1602.38	1539.26	1501.94	1389.47	1533.71	1562.53	1382.6	1213.69	2591.74	1583.02	2150.5	1788.15	2085.39	1526.48	1544.11	1680.2	1999.17	1584.52	3333.6	1336.57	1365.43	2883.47		103.522	94.0693	97.6235	114.881	92.0335	93.9417	100.999	99.7399	88.8708	103.687	89.7776	102.844	96.1071	102.505	102.126	92.078	99.4598	100.789
56	1643.18	1676.48	1395.06	2272.18	1216.51	1651.64	1191.4	1887.39	1594.8	1528.25	1506.07	1391.91	1534.02	1564.49	1382.88	1197.94	2599.2	1571.41	2156.79	1817.65	2099.27	1529.18	1553.32	1682.57	1987.24	1584.74	3339.55	1320.77	1349.89	2863.91		104.086	94.0438	98.417	115.104	93.1825	93.6041	100.568	99.6498	88.6115	103.379	90.0243	103.025	96.1268	102.634	102.147	90.8829	99.7461	100.809
57	1643.04	1676.02	1389.93	2276.59	1229.88	1645.03	1189.13	1891.1	1590.14	1528.73	1502.01	1399.14	1534.66	1569.28	1385.08	1208.16	2604.97	1586.52	2164.89	1799.5	2089.24	1533.55	1538.44	1663.12	2019.62	1595.94	3351.38	1322.81	1321.16	2847.41		104.077	93.7134	98.055	115.275	94.2067	93.2292	100.376	99.8452	87.7583		89.7821	103.559	96.1668	102.948	102.309	91.6582	99.9677	100.685
58	1649.53	1670.14	1400.01	2279.98	1237.93	1666.25	1189.89	1892	1574.83	1522.7	1508.79	1398.98	1536.72	1581.12	1393.58	1201.68	2637.91	1586.83	2175.53	1810.75	2079.13	1526.33	1536.8	1669.58	2003.1	1587.64	3334.02	1330.14	1296.26	2854.79		104.489	94.1811	98.7665	115.571	94.8233	94.4317	100.44	99.8928	87.9485		90.1869	103.548	96.296	103.725	102.937	91.167	101.232
59	1656.2	1678.47	1405.99	2285.83	1227.88	1657.33	1207.44	1879.7	1578.25	1523.74	1506.88	1384.18	1538.52	1559.86	1386.34	1253.17	2605.07	1584.89	2189.92	1781.13	2094	1552.31	1536.85	1679.99	2009.86	1591.32	3346.82	1319.95	1293.05	2839.66		104.911	94.2818	99.1886	115.897	94.0536	93.9266	101.922	99.2438	87.737		90.0731	102.452	96.4085	102.33	102.402	95.073	99.9713
60	1628.07	1680.27	1408.18	2292.28	1224	1655	1207.8	1885.48	1574.45	1519.21	1506.27	1386.08																				103.129		99.3425		93.7563	93.7945	101.953	99.5488			90.0363	102.593
[truncated: 17 more columns]

## Sheet: GdCl 20180605 1
	1	1	3	3	5	7	7	7	8	10	10	10	10	11	11	11	4	4	8	8	8	8	9	9	9	9	10	10	10	10	10	10	10	10		1	1	3	3	5	7	7	7	8	10	10	10	10	11
	5	6	1	8	10	4	5	13	12	1	2	8	14	1	4	5	2	4	5	7	8	10	1	2	3	5	2	3	5	6	7	8	9	13		5	6	1	8	10	4	5	13	12	1	2	8	14	1
0	2174.36	1737.56	2626.22	1485	2135.01	1842.84	2135.28	2302.66	2172.54	1366.92	1643.73	1902.37	1642.33	1827.45	1469.46	2114.13	2306.57	1384.47	1681.05	1590.96	1522.25	1768.31	1934.08	1113.55	2282.88	1728.22	1541.04	2014.57	2483.41	2398.46	1462.05	1339.13	2117.05	1380.06		100	100		100	100	100	100	100	100		100	100	100	100
1	2162.09	1724.47	2617.37	1470.9	2126.3	1841.43	2130.15	2298.64	2144.58	1361.98	1615.03	1892.24	1637.54	1819.72	1464.12	2110.48	2294.97	1383.52	1670.47	1588.5	1522.74	1772.63	1925.91	1120.28	2252.39	1736.13	1533.36	2005.95	2470.27	2390.59	1450.97	1321.31	2120.26	1374.89		99.4359	99.2466		99.0504	99.5918	99.9594	99.7598	99.8253	98.7129		98.2543	99.4677	99.7085	99.5767
2	2153.99	1740.99	2600.2	1462.37	2126.99	1854.65	2141.6	2292.35	2116.81	1339.12	1585.07	1880.8	1626.78	1811.24	1454.85	2089.42	2285.27	1379.83	1692.25	1598.9	1505.01	1745.86	1908.07	1117.86	2237.96	1733.64	1521.62	2005.05	2461.5	2381.99	1451.3	1309.43	2129.19	1390.34		99.063	100.197		98.476	99.6245	99.9499	100.296	99.5523	97.4348		96.4317	98.8665	99.053	99.1128
3	2160.04	1750.12	2600.38	1440.75	2124.35	1845.04	2146.16	2276.45	2080.89	1321.82	1566.34	1870.44	1620.15	1812.3	1437.45	2068.07	2268.72	1378.39	1700.22	1592.76	1516.91	1732.8	1895.48	1108.97	2218.25	1738.37	1505.39	2015.49	2452.51	2359.89	1445.1	1285.61	2116.59	1382.24		99.3413	100.723		97.0205	99.5008	99.7761	100.509	98.8615	95.7816		95.2918	98.3219	98.6494	99.1711
4	2149.11	1764.13	2582.37	1419.65	2110.83	1856.8	2141.53	2263.12	2055.78	1308.17	1543.67	1840.64	1612.86	1789.33	1428.03	2046.67	2243.99	1366.3	1716.03	1584.95	1502.92	1713.91	1869.37	1094.68	2193.37	1727.78	1485.93	2005.59	2445.42	2358.29	1439.7	1267.58	2115.9	1389.98		98.8387	101.529		95.5996	98.8676	98.8036	100.293	98.2829	94.6255		93.9131	96.7554	98.2056	97.9141
5	2143.76	1769.52	2563.87	1416.03	2102.51	1856.05	2151.92	2256.88	2038.64	1290.05	1506.79	1816.91	1600.35	1776.74	1415.02	2017.1	2216.49	1349.67	1726.41	1596.93	1487.26	1694.5	1859.05	1089.97	2172.63	1746	1467.31	2014.65	2453.81	2341.74	1439.81	1243.79	2105.28	1386.79		98.5925	101.839		95.3556	98.4777	97.677	100.779	98.0117	93.8367		91.6694	95.5079	97.444	97.2248
6	2134.42	1762.89	2561.72	1396.01	2090.74	1855.87	2148.07	2242.32	2021.44	1278.41	1487.5	1798.86	1589.19	1755.29	1398.85	2003.03	2197.88	1337.04	1737.57	1582.95	1469.37	1687.53	1830.81	1080.92	2142.76	1746.94	1446.46	2014.7	2444.16	2331.42	1422.79	1219.66	2109.88	1390.83		98.1631	101.458		94.0075	97.9266	95.8115	100.599	97.3792	93.0448		90.4953	94.559	96.7645	96.0511
7	2130.67	1773.12	2542.97	1385.86	2079.28	1852.64	2133.76	2230.8	2017.22	1270.11	1458.63	1779.72	1575.89	1740.82	1397.23	1991.59	2177.19	1325.69	1746.92	1580.67	1459.67	1657.19	1814.86	1079.4	2116.21	1743.4	1428.49	2025.88	2445.28	2324.6	1406.82	1191.48	2093.34	1390.46		97.9905	102.046		93.3243	97.3895	94.4663	99.9289	96.8792	92.851		88.7391	93.5531	95.9547	95.2592
8	2125.14	1766.71	2522.43	1365.69	2069.66	1834.58	2139.16	2210.22	1999.64	1258.05	1454.28	1769.17	1559.52	1715.03	1378.17	1971.57	2155.55	1310.58	1742.5	1573.93	1454.2	1644.54	1787.28	1074.23	2102.5	1728.6	1407.64	2008.27	2440.78	2298.05	1392.02	1189.05	2083.5	1374.87		97.7365	101.677		91.9659	96.9389	93.4001	100.182	95.9854	92.0417		88.4744	92.9986	94.9577	93.8482
9	2107.12	1767.69	2511.59	1355.74	2042.44	1813.67	2137.11	2197.23	1983.21	1251.23	1456.91	1749.18	1556.09	1709.4	1369.38	1958.87	2152.7	1293.35	1747.51	1571.18	1425.41	1627.39	1779.53	1075.92	2074.91	1740.03	1412.13	2012.75	2445.21	2289.77	1373.88	1170.96	2078.62	1381.94		96.9076	101.734		91.2955	95.664	92.469	100.086	95.4212	91.2853		88.6346	91.9476	94.7489	93.5402
10	2109.19	1774.03	2488.27	1342.65	2038.82	1779.03	2127.3	2186.88	1979.03	1247.31	1447.54	1742.76	1530.75	1697.55	1369.91	1939.31	2134.45	1288.92	1742	1556.93	1418.18	1619.05	1768.81	1077.48	2066.29	1736.54	1409.5	2010.08	2434.46	2282.09	1348.28	1166.46	2078.93	1374.28		97.0027	102.099		90.4146	95.4946	91.3003	99.6263	94.9719	91.093		88.0646	91.61	93.2063	92.8919
11	2109.41	1773.08	2456.22	1336.93	2018.52	1754.05	2114.61	2179.24	1979.85	1244.33	1445.35	1741.4	1528.74	1697.67	1362.61	1920.15	2113.58	1285.84	1735.55	1557.1	1414.9	1599.36	1761.7	1070.85	2062.85	1724.78	1400.98	2005.8	2431.71	2261.86	1332.88	1157.33	2067.53	1373.16		97.0129	102.044		90.0294	94.544	91.2092	99.0319	94.6399	91.1307		87.9314	91.5386	93.0838	92.8984
12	2101.41	1764	2436.59	1329.87	2004.17	1734.25	2104.6	2150.88	1978.06	1245.4	1435.59	1746.2	1508.12	1689.04	1361.79	1915.2	2097.05	1270.6	1732.99	1558.79	1412.21	1590.03	1748.33	1071.5	2039.15	1723.68	1399	2010.93	2426.51	2244.52	1325.76	1151.6	2057.1	1361.18		96.6449	101.521		89.5536	93.8718	91.0072	98.563	93.4085	91.0482		87.3376	91.7911	91.8282	92.4258
13	2105.13	1775.27	2424.58	1320.62	1987.12	1716.96	2100.48	2137.12	1964.5	1242.71	1442.65	1730.81	1483.77	1687.67	1368.03	1904.9	2090.48	1261.4	1719.76	1536.32	1398.99	1570.89	1756.03	1073.1	2036.13	1724.91	1399.66	2012.44	2426.94	2227.13	1331.25	1148.1	2042.78	1360.2		96.8163	102.17		88.9308	93.0731	90.4314	98.3701	92.8109	90.4243		87.767	90.9822	90.3456	92.3508
14	2108.77	1764.93	2402.55	1320.58	1963.34	1695.26	2095.01	2120.05	1959.07	1242.69	1424.29	1722.9	1485.21	1683.69	1369.39	1904.7	2083.1	1258.88	1716.77	1542.91	1393.14	1557.14	1746.43	1069.82	2027.48	1713.45	1407.22	2010.35	2428.01	2210.11	1317.88	1141.7	2032.71	1349.34		96.9833	101.575		88.9279	91.9594	90.7386	98.1142	92.0696	90.1743		86.6503	90.5664	90.4334	92.133
15	2102.39	1768.65	2387.11	1324.12	1970.1	1693.57	2090.39	2112.39	1957.52	1235.64	1419.29	1725.74	1479.72	1684.16	1361.87	1908.56	2068.88	1246.92	1702.73	1522.05	1383.64	1551.84	1733.8	1067.3	2029.55	1694.92	1411.36	2007.03	2431.06	2190.19	1324.42	1139.43	2019.25	1341.55		96.6899	101.789		89.1664	92.2759	90.7273	97.8978	91.7368	90.1028		86.3458	90.7155	90.0991	92.1587
16	2112.88	1760.26	2381	1312.42	1963.41	1689.82	2084.46	2100.36	1947.72	1248.82	1421.41	1723.82	1471.68	1687.48	1363.23	1904.93	2060.88	1249.47	1682.88	1521.14	1390.19	1541.74	1740.39	1071.6	2020.58	1697.36	1411.62	2013.15	2422.98	2179.18	1315.46	1146.99	1993.08	1335.6		97.1724	101.306		88.3785	91.9626	91.2203	97.6198	91.2145	89.6519		86.4748	90.6145	89.6094	92.3403
17	2113.87	1774.22	2369.88	1321.06	1957.74	1679.13	2079.44	2095.57	1937.88	1239.69	1421.67	1717.77	1456.61	1678.22	1356.56	1905.08	2047.11	1248.24	1675.62	1518.62	1379.55	1539.26	1730.86	1066.98	2017.27	1692.42	1415.19	2017.75	2415.85	2161.83	1315.78	1145.36	1975.62	1334.64		97.2179	102.11		88.9604	91.6971	90.9789	97.3846	91.0061	89.1989		86.4908	90.2963	88.6917	91.8337
18	2114.43	1763.98	2358.54	1309.48	1945.68	1684.83	2072.13	2078.88	1938.59	1245.25	1428.44	1715.03	1453.09	1682.14	1365.9	1910.22	2035.27	1252.53	1662.45	1517.19	1377.24	1524.03	1723.49	1076	2015.88	1686.78	1408.13	2005.22	2424.31	2153.57	1322.39	1148.44	1961.2	1333.98		97.2439	101.52		88.1808	91.1321	91.741	97.0427	90.2813	89.2315		86.9023	90.1523	88.4772	92.0483
19	2105.39	1760.81	2353.48	1311.01	1944.26	1684.62	2058.25	2062.54	1926.46	1240.44	1425.15	1717.01	1450.38	1686.52	1365.25	1904.82	2028	1252.66	1647.81	1509.17	1375.18	1524.54	1732.59	1073.54	2020.88	1688.06	1416.37	2010.48	2423.92	2141.74	1320.78	1147.07	1956.04	1335.79		96.8278	101.338		88.2838	91.0654	91.3051	96.3923	89.5719	88.6732		86.7025	90.2566	88.3126	92.2882
20	2104.9	1754.73	2342	1311.08	1946.71	1693.78	2058.04	2055.4	1934.95	1242.01	1433.94	1724.77	1445.62	1690.7	1366.34	1901.73	2024.39	1253.5	1640.99	1494.67	1349.52	1507.72	1711.23	1075.88	2017.04	1674.56	1402.44	2010.28	2419.74	2130.31	1324.63	1159.93	1950.5	1331.63		96.8054	100.988		88.2886	91.1802	91.7129	96.3826	89.2618	89.0642		87.2373	90.6643	88.0222	92.5168
21	2112.55	1761.45	2337.78	1308.22	1951.83	1689.3	2056.87	2044.85	1934.94	1241.23	1420.38	1724.41	1440.33	1696.18	1362.3	1894.64	2024.17	1263.53	1648.51	1500.95	1346.06	1513.84	1723.18	1085.64	2017.77	1679.63	1413.68	1999.62	2412.09	2136.63	1321.55	1162.5	1936.77	1338.49		97.1575	101.375		88.0957	91.4199	91.8467	96.3279	88.8035	89.0636		86.412	90.6455	87.7002	92.8164
22	2102.09	1762.06	2334.32	1309.09	1950.98	1703.45	2050.73	2038.16	1936.34	1246.08	1430.09	1728.93	1442.81	1704.08	1368.97	1889.57	2022.02	1259.57	1640.62	1502.86	1335.19	1514.54	1703.44	1077.86	2013.58	1666.77	1416.21	2003.23	2410.76	2124.29	1323.04	1172.49	1922.47	1333.77		96.6763	101.41		88.1546	91.3803	92.3005	96.0405	88.5131	89.1281		87.0031	90.8832	87.8517	93.2491
23	2100.96	1762.25	2333.39	1307.22	1946.53	1695.35	2048.19	2033.46	1922.81	1250.32	1427.74	1724.82	1434.88	1703.43	1371.02	1889.21	2027.76	1258.29	1638.75	1497.72	1328.98	1504.75	1712.06	1083.76	2015.69	1665	1407.57	1995.91	2413.59	2127.22	1322.77	1180.34	1908.68	1335.05		96.6244	101.421		88.0284	91.1719	92.1169	95.9213	88.3093	88.5052		86.8599	90.6672	87.3688	93.2136
24	2100.12	1754.47	2321.22	1304.68	1948.59	1702.92	2037.5	2037.35	1924.43	1244.68	1433.92	1725.07	1436.24	1711.26	1371.4	1888.83	2017.5	1255.79	1637.69	1495.19	1329.56	1492.55	1708.46	1092.49	2016.06	1665.14	1405.22	1998.31	2404.56	2124.44	1321.03	1182.76	1906.1	1341.44		96.5857	100.973		87.8574	91.2682	92.2008	95.4209	88.4779	88.5799		87.2362	90.6803	87.4512	93.642
25	2095.82	1749.43	2323.62	1289.95	1940.54	1705.41	2030.23	2036.7	1936.06	1250.48	1442.99	1725.35	1436.83	1713.78	1377.4	1884.08	2027.31	1254.92	1635.88	1497.32	1317.74	1493.05	1706.82	1081.53	2014	1673.26	1395.77	1999.7	2407.61	2130.41	1302.2	1184.65	1888.79	1341.79		96.3878	100.683		86.8655	90.8915	91.7546	95.0802	88.4498	89.115		87.7878	90.6948	87.4871	93.7795
26	2087.21	1744.87	2316.1	1274.58	1945.23	1713.83	2025.43	2043.52	1928.45	1251.38	1447.97	1730.64	1430.44	1712.24	1376.45	1890.15	2028.29	1262.31	1639.16	1513.13	1320.41	1490.66	1698.39	1094.66	2015.45	1665.93	1403.63	2000.62	2393.81	2129.74	1308.56	1191.46	1870.89	1344.53		95.9917	100.421		85.8303	91.1112	92.6378	94.8555	88.7459	88.7647		88.0905	90.9729	87.0982	93.6952
27	2088.59	1746.57	2316.29	1270.18	1944.32	1710.43	2020.85	2040.92	1925.85	1250.94	1438.7	1716.98	1419.56	1719.62	1364.23	1893.1	2032.78	1259.51	1638.56	1508.54	1301.63	1486.12	1703.66	1081.1	2008.06	1672.02	1407.99	1994.19	2394.34	2129.98	1316.07	1195.56	1871.84	1348.27		96.0556	100.519		85.5342	91.0683	92.7812	94.641	88.6328	88.6452		87.5266	90.2549	86.4359	94.0995
28	2076.69	1744.22	2300.48		1931.98	1711.98	2003.82	2045.61	1917.06	1251.12	1454.74	1726.33	1425.45	1731.01	1376.91	1892.64	2038.96	1262.2	1634.07	1521.92	1315.89	1486.01	1697.31	1083.03	2006.36	1662.97	1405.29	2001.22	2395.5	2122.37	1309.68	1191.62	1866.98	1352.39		95.5082	100.383			90.4906	92.8511	93.8435	88.8366	88.2407		88.5023	90.7463	86.7943	94.7224
29	2083.18	1737.08	2313.26		1935.92	1703.7	1998.67	2046.65	1918.78	1252.62	1453.28	1721.14	1414.58	1732.92	1391.01	1899.73	2034.38	1263.31	1641.56	1519.99	1306.72	1482.44	1697.8	1076.16	2011.9	1666.31	1400.7	2001.32	2389.3	2121.34	1316.53	1198.18	1865.75	1356.17		95.8064	99.972			90.6749	92.7748	93.6024	88.8819	88.3199		88.4138	90.4737	86.1327	94.8269
30	2076.45	1736.55	2311.02		1938.1	1720.1	1998.57	2044.65	1906.14	1255.09	1469.95	1726.8	1416.59	1731.15	1381.97	1895.25	2031.27	1262.12	1646.93	1541.41	1312.28	1486.75	1695.81	1081.92	2021.98	1668.12	1384.1	2000.8	2384.84	2119.52	1310.03	1193.18	1862.55	1361.39		95.4972	99.9419			90.777	92.2381	93.5976	88.7948	87.7379		89.4278	90.7712	86.2548	94.73
31	2076	1735.29	2307.21		1935.39	1722.76	1990.67	2042.18	1909.72	1255.32	1471.99	1728	1418.43	1727.85	1381.93	1889.65	2040.34	1263.36	1647.69	1548.93	1319.72	1481.41	1686.33	1085.63	2022.75	1655.12	1400.93	1993.75	2373.62	2125.02	1309.24	1208.03	1853.07	1367.04		95.4763	99.8691			90.6502	92.6421	93.2276	88.6877	87.9025		89.5519	90.8342	86.367	94.5496
32	2067.11	1725.92	2314.11		1936.68	1724.06	1989.48	2035	1902.35	1258.38	1466.35	1723.94	1409.36	1737.34	1387.03	1891.74	2029.22	1267.82	1646.56	1544.33	1317.68	1484.68	1702.32	1093.13	2028.56	1667.81	1401.26	1991.6	2372.94	2128.71	1314.09	1206.95	1849.5	1372.24		95.0675	99.3298			90.7106	92.6698	93.1719	88.3761	87.5635		89.2092	90.6211	85.8147	95.0687
33	2070.18	1722.97	2317.8		1954.31	1722.64	1976.01	2026.49	1898.56	1267.68	1473.11	1733.47	1408.17	1739.1	1396.85	1886.9	2034.14	1266.01	1642.24	1547.6	1333.66	1487.45	1694.44	1090.86	2040.85	1659.11	1415.38	1998.82	2371.03	2133.05	1314.23	1212.37	1847.49	1375.43		95.2086	99.1604			91.5365	92.8176	92.5408	88.0064	87.3889		89.6201	91.1219	85.742	95.1654
34	2065.36	1721.38	2323.97		1931.07	1712.68	1970.42	2041.23	1902.03	1264.72	1491.24	1745.65	1407.38	1746.05	1408.19	1885.9	2034.47	1265.3	1636.73	1550.72	1335.74	1493.46	1686.11	1093.17	2016.58	1651.87	1397.07	1999.98	2365.62	2138.12	1312.61	1219.75	1837.93	1384.31		94.987	99.0685			90.4478	93.0285	92.2792	88.6465	87.5488		90.7235	91.7622	85.6942	95.5457
35	2068.09	1719.29	2329.05		1943.59	1720.18	1967.9	2025.39	1909.35	1264.77	1487.96	1747.94	1411.55	1745.08	1388.88	1880.7	2039.67	1272.1	1637.88	1563.89	1338.37	1480.47	1686.72	1095.56	2044.36	1655.37	1414.56	2005.75	2361.82	2140.97	1320.38	1227.32	1832.3	1383.45		95.1127	98.9483			91.0341	92.8348	92.1609	87.9586	87.8856		90.5237	91.8823	85.9483	95.4927
36	2060.83	1706.54	2343.39		1945.19	1720.69	1957.95	2029.45	1907.65	1267.24	1491.41	1753.8	1403.29	1754.75	1396.08	1886.96	2048.71	1276.85	1645.25	1568.11	1335.82	1481.21	1665.79	1096.71	2032.92	1641.31	1401.79	1995.53	2340.97	2131.46	1332.57	1218.43	1811	1386.51		94.7787	98.2147			91.1089	92.7364	91.695	88.1347	87.8075		90.7337	92.1903	85.4453	96.0214
37	2073.33	1719.1	2354.9		1943.94	1723.44	1951.42	2034.53	1911.68	1262.53	1496.99	1749.74	1400.26	1753.56	1395.16	1883.74	2034.46	1263.6	1635.79	1562.18	1330.69	1461.16	1650.68	1099.04	2024.94	1621.38	1381.3	1970.15	2307.95	2105.97	1304.44	1213.03	1801.65	1373.61		95.3536	98.9375			91.0505	93.2086	91.3896	88.3556	87.9927		91.0729	91.9771	85.2606	95.9566
38	2097.96	1714.07	2366.28		1944.59	1727.35	1956.58	2040.42	1913.91	1262.8	1492.62	1742.65	1399.67	1758.97	1394.95	1884.4	2038.91	1268.14	1626.21	1552.5	1331.3	1458	1646.24	1092.55	2017.51	1619.52	1355.11	1971.29	2301.37	2108.4	1286.16	1206.56	1788.32	1373.71		96.4863	98.648			91.081	93.2642	91.6311	88.6113	88.0954		90.8069	91.6041	85.2248	96.2524
39	2108.42	1696.8	2374.24		1936.11	1723.76	1948.3	2044.41	1902.45	1273.68	1503.5	1757.29	1395.68	1767.65	1400.73	1884.86	2039.64	1260.31	1622.4	1561.29	1328.06	1459.85	1642.56	1088.28	2020.98	1617.52	1371.2	1961.55	2287.26	2100.75	1286.33	1209.09	1787.57	1375.57		96.9672	97.6541			90.6837	92.797	91.2434	88.7846	87.5682		91.4691	92.3737	84.9817	96.7274
40	2123.85	1687.15	2393.4		1936.18	1721.93	1957.78	2041.32	1915.97	1272.56	1513.4	1764.48	1401.67	1782.31	1410.78	1891.99	2043.07	1263.83	1616.02	1547.11	1330.31	1451.78	1645.38	1088.31	2027.72	1623.9	1367.65	1968.42	2286.99	2109.18	1285.1	1212.65	1785.08	1374.31		97.6768	97.0985			90.687	93.2042	91.6874	88.6505	88.1905		92.0711	92.7519	85.3465	97.53
41	2150.1	1684.88	2409.34		1945.83	1730.7	1962.35	2041.9	1919.64	1273.96	1513.64	1771.33	1403.08	1769.62	1402.9	1868.94	2043.76	1254.75	1620.38	1566.94	1329.83	1454.52	1644.88	1094.53	2027.15	1613.91	1380.61	1965.74	2283.78	2114.39	1287.14	1209.78	1781.57	1371.13		98.8841	96.9678			91.1392	93.2237	91.9013	88.6757	88.3593		92.0861	93.112	85.4321	96.8352
42	2160.21	1672.8	2412.02		1937.41	1731.73	1961.14	2037.84	1929.38	1268.88	1513.39	1770.97	1388.16	1780.81	1404.12	1870.09	2050.93	1256.37	1623.18	1562.74	1336.2	1472.47	1648.32	1099	2022.64	1621.23	1375.31	1964.57	2281	2132.37	1283.54	1209.7	1795.16	1383.44		99.3493	96.2727			90.7447	93.1359	91.8448	88.4993	88.8074		92.0709	93.0932	84.5238	97.4477
43	2173.74	1673.14	2432.88		1937.43	1723.05	1954.2	2048.88	1924.05	1273.8	1520.77	1777.85	1388.32	1783.9	1402.82	1862.51	2058.14	1249.55	1625.16	1563.95	1342.49	1465.13	1663.74	1095.53	2038.99	1611.62	1384.67	1968.55	2283.13	2125.41	1288.85	1212.76	1792.07	1385.24		99.9714	96.2922			90.7456	92.7777	91.5195	88.9787	88.5625		92.5197	93.4549	84.5333	97.6165
44	2188.58	1677.98	2452.95		1934.23	1730.61	1949.15	2054.14	1934.12	1274.73	1514.59	1785.62	1387.78	1782.6	1406.48	1858.4	2059.88	1250.6	1622.53	1564.57	1342.55	1456.99	1668.01	1095.42	2036.37	1623.8	1385.46	1974.25	2270.34	2128.2	1296.33	1221.33	1802.11	1390.41		100.654	96.5708			90.5959	93.1839	91.2829	89.207	89.0258		92.1434	93.8633	84.5009	97.5454
45	2206	1669.69	2459.94		1932.17	1730.98	1959.53	2053.46	1926.76	1273.23	1522.73	1782.25	1385.46	1802.66	1424.24	1867.43	2069.75	1248.63	1627.35	1564.99	1345.46	1463.71	1671.06	1095.96	2044.31	1615.5	1385.17	1982.31	2270.34	2136.92	1309.53	1221.34	1802	1385.12		101.455	96.0938			90.4991	93.0301	91.769	89.1776	88.687		92.6386	93.686	84.3593	98.6433
46	2220.91	1671.1	2483.07		1924.46	1729.35	1955.49	2058.68	1938.53	1273.68	1525.57	1783.58	1379.27	1806.31	1425.01	1868.2	2057.69	1245.8	1618.42	1567.07	1349.42	1467.94	1683.87	1110.78	2045.59	1606.64	1390.61	1983.84	2272.7	2140.5	1306.58	1230.78	1810.62	1387.2		102.141	96.1748			90.1384	93.2533	91.5801	89.4045	89.2289		92.8118	93.7559	83.9825	98.8432
47	2230	1662.18	2500.14		1942.62	1722.7	1950.24	2054.96	1935.11	1273.34	1522.27	1784.52	1386.27	1801.78	1406.1	1849.09	2067.33	1244.28	1626.57	1574.37	1356.51	1473.31	1687.48	1102.44	2055.49	1615.21	1370.45	1988.56	2278.19	2140.52	1312.96	1230.93	1810.84	1396.31		102.559	95.6619			90.9889	92.5549	91.334	89.2429	89.0716		92.6111	93.8052	84.4088	98.5953
48	2194.09	1656.61	2504.2		1933.86	1730.24	1954.89	2055.13	1934.89	1276.17	1510.96	1776.6	1379.64	1802.17	1424.39	1860.52	2069.23	1245.32	1625.91	1588.13	1354.29	1461.55	1691.3	1107.84	2052.05	1615.59	1398.94	1989.86	2278.02	2138.61	1309.12	1225.52	1813.52	1404.73		100.908	95.341			90.5787	92.958	91.552	89.25	89.0614		91.9232	93.3891	84.0048	98.6165
49	2162.12	1649.52	2524.72		1940.05	1727.38	1954.06	2068.27	1942.14	1269.4	1527.05	1784.11	1387.39	1809.82	1429.11	1863.96	2081.39	1239.85	1624.98	1582.25	1352.69	1466.19	1682.74	1119.58	2055.3	1629.58	1397.6	1990.56	2279.11	2136.37	1316.4	1232.85	1812.02	1403.92		99.4371	94.933			90.8682	93.0866	91.5132	89.8207	89.395		92.9015	93.7837	84.4772	99.0353
50	2119.46	1647.6	2545.35		1942.18	1731.53	1959.44	2071.11	1950.29	1271.74	1523.09	1784.56	1387.56	1819.87	1426.85	1849.63	2079.56	1239.96	1643.5	1589.72	1358.65	1463.27	1697.93	1111.93	2058.99	1628.52	1405.88	1995.58	2286.46	2151.72	1332.6	1232.63	1814.35	1410.08		97.4752	94.8226			90.9683	93.0375	91.7652	89.944	89.77		92.6606	93.8074	84.4871	99.5852
51	2103.01	1663.91	2554.51		1950.03	1718.56	1954.72	2057.39	1959.76	1266.71	1527.8	1774.17	1381.15	1802.62	1417.1	1840.89	2076.44	1234.78	1632.69	1585.69	1364.24	1469.36	1682.13	1113.87	2066.77	1619.97	1394.83	1997.7	2280.9	2150.44	1328.69	1229.87	1821.98	1410.2		96.7184	95.7609			91.3356	93.2187	91.5437	89.3481	90.2062		92.9472	93.261	84.0969	98.641
52	2104.56	1663.09	2563.66		1945.82	1726.04	1967.52	2074.14	1958.31	1268.81	1540.39	1781.66	1391.04	1818.91	1418.85	1832.26	2086.28	1237.3	1643.32	1605.68	1360.28	1473.28	1696.06	1110.37	2056.46	1631.22	1395.13	1998.87	2280.63	2152.76	1337.49	1236.87	1822.2	1419.34		96.79	95.714			91.1388	93.2594	92.1432	90.0758	90.1394		93.7132	93.6552	84.6991	99.5324
53	2123.84	1651.03	2567.62		1939.89	1728.43	1969.16	2073.03	1967.28	1277.43	1542.07	1784.28	1388.94	1825.62	1436.86	1843.67	2091.34	1236.08	1640.67	1601.55	1360.83	1470.34	1688.81	1116.33	2059.61	1631.66	1391.54	2006.82	2278.36	2164.53	1345.67	1245.77	1823.59	1420.55		97.6768	95.02			90.8609	93.1954	92.2203	90.0275	90.552		93.8154	93.7927	84.5711	99.8997
54	2120.86	1653.85	2585.99		1943.02	1727.52	1969.73	2075.45	1968.5	1278.27	1537.74	1784.68	1376.7	1823.35	1423.41	1834.59	2093.6	1238.82	1647.73	1605.92	1367.06	1479.24	1705.25	1111.16	2063.13	1625.69	1395.43	2003.9	2277.87	2161.96	1346.59	1242.9	1819.24	1422.89		97.5397	95.1824			91.0076	93.5568	92.2469	90.1324	90.6081		93.5521	93.8136	83.826	99.7753
55	2134.92	1657.22	2592.29		1940.66	1730.88	1983.78	2080.54	1976.81	1273.15	1538.82	1774.15	1382.06	1821.64	1419.07	1829.1	2099.09	1235.46	1649.04	1610.01	1372.75	1472.97	1689.39	1110.94	2067.75	1631.56	1399.56	2011.07	2281.98	2162.3	1339.67	1240.39	1808.2	1423.51		98.1863	95.3761			90.8969	93.527	92.905	90.3537	90.9908		93.618	93.2604	84.1525	99.6819
56	2146.16	1652.72	2590.07		1943.8	1731.64	1994.98	2080.36	1985.09	1277.29	1525.37	1773.49	1384.75	1831.48	1428.81	1821.22	2097.43	1238.26	1648.95	1603.12	1366.38	1475.01	1695.46	1123.96	2066.55	1633.41	1404.84	2010.03	2288.42	2173.02	1341.87	1248.3	1815.29	1433.94		98.7031	95.1174			91.044	93.2452	93.4294	90.3458	91.3717		92.7997	93.2255	84.3165	100.22
57	2156.37	1648.15	2592.18		1931.44	1730.45	1993.65	2079.43	1989.3	1283.68	1536.01	1775.1	1378.76	1845.85	1437.16	1847.35	2099.33	1239.4	1644.63	1608.01	1381.99	1463.52	1699.65	1130.77	2068.62	1655.27	1400.11	2009.75	2293.53	2167.01	1346.94	1248.14	1814.2	1440.23		99.1724	94.8543			90.465		93.3672	90.3055	91.5657		93.4471	93.3098	83.9514	101.007
58	2171.54	1653.43	2597.02		1939.1	1737.16	1991.51	2075.9	2000.82	1272.43	1539.61	1783.57	1375.17	1829.29	1426.91	1820.82	2106.94	1236.87	1645.36	1603.14	1389.97	1472.01	1703.51	1124.93	2069.16	1636.72	1402.98	2022.59	2294.56	2169.45	1352.57	1247.13	1820.63	1428.76		99.8701	95.1581			90.8239		93.2669	90.1522	92.0957		93.666	93.7554	83.733	100.1
59	2177.95	1638.25	2592.57		1928.49	1736.61	1997.36	2067.96	1990.32	1265.87	1536.53	1770.59	1380.33	1831.4	1430.23	1821.57	2108.46	1239.49	1641.27	1606.37	1395.66	1470.59	1692.22	1129.08	2072.61	1642.73	1402.14	2024.9	2298.33	2166.27	1355.43	1249.89	1816.93	1437.61		100.165	94.2846			90.3269		93.541	89.8073	91.6127		93.4782	93.0733	84.0471	100.216
60	2194.47	1649.24	2593.02		1923.96	1731.38	1998.58	2062.69	2006.37	1272.16	1545.99	1780.36	1387.14	1833.69	1436.87	1812.76	2114.2	1239.88	1654.44	1606.99	1391.48	1458.26	1698.63	1116.86	2084.26	1641.1	1405.61	2023.5	2304.96	2168.95	1357.33	1246.16		1447.56		100.925	94.9171			90.1149		93.598	89.5785	92.3513		94.0542	93.5867	84.462	100.342
[truncated: 23 more columns]

## Sheet: EIPA+Y27 20180808
	1	2	2	3	4	4	4	6	6	6	6	6	7	7	9	9	9	11	1	1	1	1	4	6	6	6	7	7	7	7	8	9	10		1	2	2	3	4	4	4	6	6	6	6	6	7	7	9
	1	1	2	1	1	2	3	1	5	6	7	8	5	7	1	7	8	1	2	4	5	6	1	1	3	4	1	4	5	10	1	1	1		1	1	2	1	1	2	3	1	5	6	7	8	5	7	1
0	2574.23	1949.67	2158.39	2175.62	2031.59	1962.92	2266.12	2229.35	3173.45	2084.16	2440.73	1893.2	2853.85	1528.13	3157.08	3041.7	2481.59	1637.31	1968.82	2212.48	1240.57	1649.15	3169.27	1898.19	1420.57	2196.17	1442.29	1443.01	1896.57	2538.22	1204.39	2218.07	2807.61		100	100	100	100	100	100	100	100	100	100	100	100	100	100	100
1	2609.18	1935.49	2158	2175.17	2035.92	1956.23	2253.79	2237.21	3157.92	2042.16	2439.2	1907.09	2848.37	1531.07	3206.45	3064.28	2487.94	1634.82	1968.03	2151.68	1254.43	1646.71	3199.51	1900.03	1421.81	2185.63	1455.88	1450.27	1906.32	2567.84	1211.21	2234.68	2826.92		101.358	99.2725	99.9817	99.9793	100.21	99.6592	98.5523	100.353	99.3823	97.9217	99.9375	100.734	99.8079	100.528	101.564
2	2641.06	1932.23	2157.81	2174.66	2043.53	1958.79	2221.16	2243.1	3138.41	1999.72	2441.54	1902.78	2827.87	1539.16	3242.33	3084.71	2497.88	1638.78	1964.05	2121.79	1263.17	1650.52	3238.23	1910.43	1428.65	2178.15	1454.29	1468.01	1904.57	2603.27	1220.17	2245.35	2862.36		102.596	99.1057	99.9731	99.9561	100.342	99.7894	97.5079	100.617	98.7668	96.2091	100.033	100.506	99.0894	101.944	102.7
3	2654.55	1936.88	2151.9	2176.72	2038.5	1960.66	2197.62	2252.56	3118.97	1964.75	2443.47	1911.18	2808.86	1560.83	3286.81	3109.35	2519.6	1642.83	1955.09	2081.17	1277.97	1653.08	3284.94	1902.21	1439.27	2181.57	1467.41	1486.52	1907.46	2624.09	1216.65	2251.88	2891.95		103.12	99.3439	99.6993	100.051	100.98	99.885	96.6163	101.041	98.7778	94.9613	100.112	100.949	98.4232	102.908	104.109
4	2672.32	1940.35	2151.55	2176.09	2042.79	1971.73	2177.53	2257.46	3119.32	1939.26	2457.58	1920.2	2789.73	1575.59	3329.68	3129.93	2514.54	1652.4	1959.88	2052.01	1293.45	1666.99	3331.17	1891.71	1430.25	2176.24	1483.83	1489.19	1890.32	2652.55	1222.42	2253.96	2914.01		103.81	99.522	99.6833	100.022	101.672	100.449	95.4372	101.261	98.4032	93.2825	100.69	101.426	97.7531	102.935	105.467
5	2692.39	1932.08	2173.44	2181.13	2045.47	1974.52	2150.95	2259.91	3107.49	1904.98	2470.93	1932.83	2781.39	1576.01	3368.22	3144.13	2531.58	1660.1	1950.19	2026.29	1298.63	1683.26	3364.54	1887.04	1422.52	2178.99	1489.9	1483.9	1887.14	2659.34	1230.69	2265.17	2954.85		104.59	99.0979	100.697	100.253	102.148	100.591	94.4175	101.371	98.2627	92.7174	101.238	102.093	97.461	103.217	106.688
6	2686.26	1941.35	2174.7	2189.2	2058.47	1981.12	2127.97	2264.46	3103.05	1893.44	2497.95	1944.28	2780.18	1580.32	3399.75	3155.48	2548.39	1667.24	1949.44	1993.73	1298.5	1689.56	3398.65	1874.06	1411.76	2180.53	1499.76	1474.19	1885.54	2663.28	1228.04	2251.91	2966.42		104.352	99.5732	100.755	100.624	102.633	100.927	93.7979	101.575	98.5154	91.4019	102.344	102.698	97.4185	103.152	107.687
7	2697.53	1949.71	2173.89	2196.29	2072.59	1985.39	2114.01	2269.61	3111.03	1866.58	2513.15	1951.65	2779.2	1579.33	3441.38	3162.59	2558.07	1664.31	1956.07	1960.47	1291.66	1692.32	3428.03	1856.94	1396.63	2169.37	1494.72	1478.03	1860.61	2653.8	1222.19	2237.89	2992.17		104.79	100.002	100.718	100.95	103.848	101.145	92.7099	101.806	98.4276	90.5812	102.967	103.087	97.3842	103.091	109.005
8	2684.88	1952.19	2169.07	2202.38	2082.3	2009.03	2089.48	2271.64	3108.26	1849.82	2549.63	1957.65	2789.58	1578.4	3453.08	3175.9	2589.35	1682.41	1952.53	1931.55	1289.71	1699.72	3464.27	1861.72	1390.11	2165.82	1497.8	1475.47	1850.59	2644.14	1224.66	2230.04	3002.66		104.298	100.129	100.495	101.23	104.857	102.349	92.0393	101.897	98.3959	89.4783	104.462	103.404	97.7478	102.557	109.375
9	2673.36	1952.16	2185.63	2182.62	2092.18	1993.54	2074.37	2280.54	3107.26	1827.29	2569.09	1957.75	2799.39	1570.21	3459.56	3188.99	2597.13	1684.22	1958.8	1914.44	1290.11	1697.9	3482.83	1851.74	1392.43	2160.11	1500.92	1472.09	1827.24	2626.52	1218.46	2218.55	3006.42		103.851	100.128	101.262	100.322	105.359	101.56	91.564	102.296	98.3148	89.0841	105.259	103.409	98.0916	102.378	109.581
10	2655.34	1951.85	2168.68	2173.48	2116.94	2014.02	2063.66	2289.52	3104.7	1819.24	2585.3	1966.14	2801.67	1567.48	3487.03	3210.64	2616.24	1695.96	1948.45	1881.27	1285.11	1696.77	3528.03	1842.08	1385.58	2154.92	1509.73	1472.87	1821.59	2596.77	1205.4	2194.58	3002.08		103.151	100.112	100.477	99.9015	105.535	102.603	91.1544	102.699	98.4575	88.2914	105.923	103.852	98.1715	101.923	110.451
11	2638.49	1950.87	2171.32	2165.78	2137.51	2026.09	2054.43	2278.42	3109.21	1803.06	2596.27	1970.62	2795.64	1560.52	3490.18	3229.45	2640.9	1697.36	1947.93	1872.36	1286.02	1684.52	3541.57	1841.78	1388.33	2149.28	1517.65	1464.19	1805.87	2568.62	1199.86	2206.84	2996.1		102.496	100.061	100.599	99.548	105.975	103.218	90.8569	102.201	98.8431	88.0246	106.373	104.089	97.9601	102.104	110.551
12	2626.34	1951.91	2158.38	2153.93	2147.74	2024.32	2047.72	2283.5	3121.38	1797.61	2625.72	1973.14	2813.01	1563.29	3502.07	3255.93	2648.03	1707.25	1935.95	1857.04	1288.78	1675.6	3565.25	1831.04	1380.09	2154.97	1522	1455.69	1797.05	2532.62	1211.98	2196.08	3009.98		102.024	100.115	99.9993	99.003	106.683	103.128	91.1472	102.429	99.4514	88.2174	107.58	104.222	98.5687	101.925	110.927
13	2600.01	1945.28	2165.77	2141.38	2151.33	2038.5	2054.26	2292.46	3140.59	1801.54	2646.06	1980.74	2821.35	1560.54	3501.92	3264.43	2653.18	1705.25	1935.94	1847.6	1294.47	1666.56	3580.7	1813.79	1383.04	2137.7	1524.17	1452.45	1792.62	2499.11	1195.64	2188.28	3009.33		101.002	99.7747	100.342	98.4263	107.273	103.85	90.575	102.831	98.726	87.8322	108.413	104.624	98.8612	101.598	110.923
14	2582.85	1939.79	2155.9	2121	2160.29	2057.36	2041.37	2297.93	3117.69	1793.68	2651.82	1978.33	2835.74	1555.53	3498.79	3270.81	2652.72	1717.44	1928.27	1841.38	1298.64	1657.29	3596.31	1818.83	1386.73	2133.35	1529.09	1463.5	1784.39	2462.06	1204.19	2184.23	3020.95		100.335	99.4934	99.8847	97.4897	106.965	104.811	90.7531	103.076	99.3098	87.313	108.649	104.496	99.3653	101.192	110.823
15	2566.91	1950.41	2161.81	2115.2	2174.73	2047.14	2045.38	2314.13	3136.12	1783.07	2673.49	1978.84	2834.73	1549.31	3494.15	3274.98	2659.91	1718.45	1925.67	1842.66	1299.44	1645.9	3617.08	1814.2	1387.94	2120.45	1548.64	1466.21	1787.73	2444.67	1199.4	2185.09	2996.44		99.7156	100.038	100.158	97.223	106.959	104.291	90.6351	103.803	99.9612	87.674	109.536	104.523	99.3299	100.867	110.677
16	2551.03	1949.12	2149.61	2104.3	2186.76	2067.98	2042.72	2297.6	3156.69	1790.45	2686.32	1975.11	2862.48	1544.34	3473.29	3285.39	2661.59	1717.5	1928.76	1837.07	1307.58	1635.2	3623.59	1812.47	1390.23	2115.21	1550.94	1464.95	1792.29	2445.38	1198.97	2181.07	3009.44		99.0989	99.972	99.5932	96.7221	106.862	105.352	90.4937	103.062	100.792	87.5728	110.062	104.326	100.302	101.05	110.016
17	2550.06	1949.82	2141.67	2085.59	2180.48	2070.08	2039.54	2317.7	3182.92	1788.38	2717.09	1971.12	2868.96	1547.14	3461.96	3282.19	2662.1	1727.95	1917.34	1830.69	1315.86	1640.48	3658.68	1807.37	1389.13	2115.28	1558.15	1463.36	1783.49	2421.34	1204.2	2185	2987.9		99.0609	100.008	99.2254	95.8618	106.748	105.459	90.3106	103.963	101.707	88.0832	111.323	104.116	100.529	100.338	109.657
18	2548	1944.88	2127.48	2077.54	2180.36	2076.38	2035.41	2328.04	3211.82	1798.8	2721.43	1980.34	2874.57	1536.25	3446.7	3290.44	2670.75	1738.12	1915.93	1826.79	1315.1	1636.29	3652.61	1802.29	1387.75	2111.93	1555.91	1462.46	1776.78	2410.62	1198.73	2181.59	2981.78		98.981	99.7544	98.5676	95.4919	106.188	105.78	90.1196	104.427	102.408	88.0404	111.501	104.603	100.726	99.7256	109.173
19	2543.86	1939.18	2127.31	2072.8	2178.39	2088.91	2031.1	2331.6	3233.95	1797.93	2746.84	1981.76	2895.56	1526.86	3434.72	3290.6	2655.85	1738.94	1903.26	1824.95	1327.45	1637.49	3662.57	1802.44	1386.84	2107.82	1574.21	1462.2	1773.43	2386.71	1204.51	2169.12	2977.87		98.8202	99.4619	98.56	95.2743	105.919	106.419	90.2748	104.587	103.54	88.4526	112.542	104.677	101.462	99.068	108.794
20	2541.15	1944.56	2127.19	2062.86	2176.05	2091.15	2034.6	2345.07	3269.72	1806.35	2752.55	1988.12	2907.34	1516.8	3427.12	3317.85	2657.53	1757.66	1903.5	1827.34	1315.73	1633.59	3662.7	1801.67	1388.1	2095.57	1578.34	1463.7	1771.73	2383.06	1200.32	2172.48	2964.4		98.7149	99.7379	98.5547	94.8173	105.059	106.533	90.3748	105.191	104.871	88.7008	112.776	105.013	101.874	99.1563	108.553
21	2529.83	1945.38	2110.34	2064.49	2164.64	2102.03	2036.86	2363.65	3311.73	1811.42	2761.01	1987.56	2917.27	1518.15	3419.68	3321.25	2665.58	1755.15	1906.06	1825.75	1334.2	1632.52	3652.84	1820.83	1382.47	2092.16	1570.5	1461.67	1770.88	2374.7	1206.38	2178.13	2965.34		98.2751	99.7801	97.7735	94.8919	105.54	107.087	90.3686	106.024	105.526	88.6252	113.122	104.984	102.222	99.6506	108.318
22	2521.97	1950.24	2112.14	2059.28	2159.15	2101.96	2036.72	2368.81	3332.44	1809.87	2759.31	1987.49	2928.41	1525.72	3396.28	3315.64	2666.96	1766.91	1914.13	1826.59	1336.42	1639.64	3660.49	1816.14	1384.11	2075.73	1583.51	1467	1772.47	2379.29	1201.56	2175.41	2958.43		97.9698	100.029	97.8572	94.6525	104.593	107.083	90.1587	106.256	106.427	88.8603	113.053	104.98	102.612	99.1367	107.577
23	2527.26	1944.15	2107.9	2072.85	2141.64	2110.64	2031.99	2389.99	3360.89	1814.67	2768.48	1997.32	2938.39	1517.85	3388.27	3317.37	2670.11	1771.56	1896.91	1821.36	1346.2	1632.99	3659.02	1821.52	1381.2	2076.52	1587.3	1466.89	1771.32	2379.73	1207.8	2176.63	2962.3		98.1754	99.7169	97.6608	95.2763	104.223	107.526	89.9696	107.206	106.64	89.2149	113.429	105.5	102.962	98.8378	107.323
24	2512.19	1947.16	2102.89	2071.98	2151.44	2123.32	2027.72	2399.07	3367.61	1821.92	2778.77	1996.54	2954.27	1513.27	3379.91	3315.34	2670.06	1784.24	1895.35	1830.64	1349.7	1641.75	3648.08	1815.47	1379.15	2069.48	1575.5	1462.84	1763.85	2368.23	1213.89	2185.77	2978.14		97.5901	99.8715	97.4288	95.2365	104.002	108.171	90.1074	107.613	107.316	89.5606	113.85	105.458	103.519	98.5325	107.058
25	2500.54	1951.31	2088.8	2083.74	2132.12	2129.01	2030.83	2408.02	3388.95	1828.97	2772.15	1995.33	2960.87	1508.6	3372.04	3328.14	2666.28	1788.25	1886.62	1823.27	1353.48	1639.67	3650.99	1826.18	1385.29	2062.46	1579.05	1464.93	1763.84	2361.18	1207.74	2193.44	2968.09		97.1373	100.084	96.7757	95.7768	103.937	108.462	89.9645	108.014	108.431	89.8721	113.579	105.394	103.75	98.7968	106.809
26	2490.52	1948.93	2081.76	2092.54	2124.58	2131.58	2027.61	2432.58	3424.17	1835.34	2781.98	1989.92	2980.12	1512.65	3366.13	3322.22	2668.71	1799.42	1898.41	1822.08	1348.57	1647.44	3644.61	1826.83	1390.01	2042.06	1588.69	1460.65	1766.66	2355.04	1214.43	2194.05	2974.82		96.748	99.9619	96.4494	96.1814	103.448	108.592	90.0903	109.116	109.125	90.2526	113.982	105.109	104.425	98.6861	106.621
27	2493.87	1955.96	2067.36	2086.01	2120.09	2138.37	2030.44	2438.67	3446.08	1843.11	2781.27	1989.36	2992.88	1510.95	3358.01	3319.83	2672.78	1804.48	1889.91	1830.51	1355.29	1647.49	3640.09	1837.38	1392.2	2036.14	1584.14	1469.65	1763.64	2353.65	1215.93	2197.61	2974.25		96.8782	100.323	95.7824	95.8812	103.557	108.938	90.3483	109.389	109.244	89.7115	113.952	105.079	104.872	97.6005	106.364
28	2495.52	1958.52	2059.28	2098.06	2118.75	2127.71	2036.26	2441.05	3449.84	1832.06	2781.74	1979.55	3008.24	1494.33	3348.93	3336.84	2677.7	1816.34	1887.29	1827.05	1356.21	1653.27	3644.74	1841.82	1399.19	2038.08	1589.36	1470.88	1779.12	2346.37	1219.99	2185.66	2983.72		96.9423	100.454	95.4079	96.4353	103.579	108.395	89.3558	109.496	109.26	89.9212	113.972	104.561	105.41	97.2394	106.077
29	2471.12	1972.01	2063.97	2101.58	2108.79	2127.66	2013.89	2449.68	3450.35	1836.34	2784.33	1989.84	3029.59	1488.8	3334.66	3354.29	2676.11	1821.8	1885.9	1834.22	1363.07	1651.49	3660.57	1848.88	1394.02	2028.94	1592.74	1471.88	1775.97	2348.61	1234.03	2246.02	2962.5		95.9945	101.146	95.6255	96.5969	103.156	108.393	89.1193	109.883	109.354	89.8469	114.078	105.104	106.158	98.1511	105.625
30	2475.45	1966.34	2053.74	2109.7	2111.02	2123.21	2008.56	2459.06	3453.31	1834.82	2791.55	1991.34	3038.72	1502.76	3323.73	3363.31	2676.87	1830.73	1887.15	1829.66	1364.77	1654.76	3658.46	1845.01	1397.05	2031.4	1602.29	1468.17	1775.16	2349.16	1223.49	2245.94	2960.91		96.1627	100.855	95.1512	96.9701	102.692	108.166	89.0768	110.304	109.824	89.8756	114.374	105.184	106.478	97.8981	105.278
31	2460.18	1969.68	2055.72	2107.73	2111.46	2116.17	2007.6	2467.41	3468.15	1835.41	2784.67	1983.27	3062.06	1498.89	3311.01	3384.79	2691.84	1842.35	1881.69	1835.29	1370.05	1652.47	3663.81	1856.56	1410.22	2024.26	1594.06	1466.63	1777.6	2360.15	1225.46	2254.41	2958.11		95.5696	101.026	95.2431	96.8796	103.135	107.807	89.3461	110.679	110.004	89.8945	114.092	104.757	107.296	98.1407	104.876
32	2466.4	1975.8	2054.5	2115.37	2102.83	2103.78	2013.67	2460.17	3473.85	1835.79	2781.27	1987.62	3073.86	1502.6	3303.93	3402.58	2691.32	1850.16	1883.42	1841.38	1365.44	1663	3662.07	1868.55	1402.89	2019.35	1597.81	1486.44	1776.93	2347.8	1230.32	2249.75	2974.58		95.8111	101.34	95.1868	97.2307	102.312	107.176	90.246	110.354	109.29	89.3983	113.952	104.987	107.709	98.1869	104.651
33	2454.54	1969.74	2049.9	2112.05	2093.37	2102.53	2033.95	2457.99	3451.3	1825.66	2773	1983.7	3093.52	1503.31	3289.84	3405.64	2685.25	1850.84	1889.61	1845.99	1372.01	1656.28	3663.14	1872.65	1409.5	2013.42	1600.05	1490.64	1780.41	2350.31	1229.24	2248.38	2955.02		95.3504	101.029	94.9737	97.0784	102.633	107.112	89.4157	110.256	109.044	89.6925	113.614	104.78	108.398	98.4424	104.205
34	2452.45	1973.19	2065.13	2114.5	2102.41	2095.02	2015.24	2473.5	3443.53	1831.67	2772.01	1976.24	3105.64	1507.22	3279.75	3408.43	2691.44	1851.88	1884.34	1845.16	1376.74	1659.94	3653.93	1868.48	1402.43	2004.04	1597.67	1475.08	1775.81	2362.51	1220.06	2250.05	2952.99		95.2694	101.206	95.6793	97.1909	102.284	106.73	89.4196	110.952	108.49	89.8462	113.573	104.386	108.823	98.5573	103.885
35	2444.9	1973.26	2066.62	2123.01	2085.63	2104.71	2015.33	2462.22	3426.01	1834.81	2770.5	1969.3	3142.51	1508.98	3277.8	3421.6	2678.99	1862.61	1886.63	1849.15	1372.63	1673.37	3660.91	1867.24	1402.15	1997.71	1594.26	1479.17	1779.88	2359.61	1229.88	2254.64	2951.46		94.9762	101.21	95.7481	97.5821	102.298	107.224	88.9455	110.446	108.003	89.5225	113.511	104.02	110.114	98.504	103.824
36	2444.2	1963.59	2069.64	2123.85	2092.18	2104.59	2004.64	2454.86	3410.64	1828.2	2758.04	1965.47	3171.99	1508.16	3272.38	3423.84	2687.73	1862.44	1909.12	1853.5	1373.19	1664.27	3658.14	1879.08	1405.01	1994.36	1587.24	1473.85	1773.27	2354.92	1221.55	2259.82	2932.62		94.9488	100.714	95.8882	97.6205	102.068	107.217	88.8481	110.116	107.426	90.2576	113.001	103.817	111.148	98.136	103.652
37	2439.64	1961.88	2064.22	2119.98	2085.05	2091.92	2002.45	2453.23	3392.43	1843.21	2758.67	1968.83	3170.02	1502.53	3266.63	3436.28	2682.93	1869.96	1912.63	1855.12	1389.97	1672.49	3651.79	1893.68	1410.34	1990.37	1594.43	1473.96	1763.69	2356.85	1222.38	2267.46	2940.91		94.7717	100.626	95.6371	97.4429	102.185	106.572	89.1139	110.043	106.178	90.1173	113.026	103.995	111.079	98.3533	103.47
38	2437.77	1949.83	2068.28	2125.98	2085.35	2096.23	2008.44	2434.71	3353	1840.34	2753.55	1965.11	3199.99	1505.86	3275.46	3440.35	2672.77	1881.98	1910.64	1860.86	1380.31	1668.96	3645.51	1895.77	1414.37	1986.81	1584.04	1473.97	1749.22	2356.17	1217.6	2280.75	2934.06		94.699	100.008	95.8249	97.7185	102.104	106.791	88.7057	109.212	105.364	90.1511	112.817	103.798	112.129	98.3794	103.749
39	2440.98	1944.61	2079.74	2131.69	2080.66	2094.76	1999.24	2435.33	3327.32	1841.03	2757.73	1976.72	3214.84	1506.26	3273.47	3446.06	2678.15	1877.37	1930.28	1864.34	1379.88	1682.71	3650.57	1896.11	1418.08	1982.67	1580.9	1468.75	1757.55	2354.56	1220.95	2272.22	2919.61		94.8237	99.7405	96.356	97.9808	102.183	106.716	89.2621	109.24	104.288	90.249	112.988	104.411	112.649	98.2731	103.686
40	2434.18	1942.5	2070.49	2128.4	2083.04	2107.13	2011.78	2451.51	3293.32	1843.03	2761.21	1965.7	3239.73	1504.63	3276.01	3455.49	2681.73	1885.23	1932.51	1861.93	1379.94	1671.46	3656.84	1878.65	1419.17	1977.78	1585.15	1466.07	1754.6	2353.39	1222.53	2273.51	2905.78		94.5596	99.6325	95.9275	97.8295	102.099	107.347	89.554	109.965	103.561	90.7718	113.131	103.829	113.521	98.6255	103.767
41	2439.61	1938.36	2089.27	2113.7	2081.38	2091.83	2018.36	2443.59	3270.38	1853.71	2745.12	1966.11	3252.98	1510.02	3276.37	3460.8	2673.1	1887.86	1943.19	1865.3	1383.9	1678.19	3655.22	1885.5	1420.29	1970.29	1575.21	1462.15	1735.69	2340.56	1215.39	2271.75	2893.18		94.7705	99.42	96.7975	97.1539	101.916	106.567	90.6393	109.61	102.927	91.4495	112.472	103.851	113.985	98.4853	103.778
42	2447.06	1936.14	2086.15	2125.43	2083.01	2084.54	2042.82	2436.69	3250.35	1867.55	2738.65	1964.9	3273.05	1507.88	3266.01	3451.35	2675.56	1896.38	1963.24	1865.78	1381.56	1682.61	3660.41	1899.74	1424.23	1971.14	1569.76	1465.03	1741.75	2346.17	1218.93	2272.69	2879.98		95.0598	99.3061	96.6529	97.6931	101.893	106.196	90.8121	109.3	101.86	91.1307	112.206	103.787	114.689	98.5095	103.45
43	2436.34	1946.95	2092.33	2113.09	2081.29	2088.66	2046.71	2433.4	3216.66	1861.04	2745.56	1950.14	3291.21	1508.25	3281.2	3458.15	2684.25	1888.52	1973.85	1866.12	1387.4	1681.55	3636.5	1891.07	1433.55	1963.28	1570.5	1461.1	1750.77	2353.73	1213.11	2269	2863.6		94.6434	99.8607	96.9393	97.1261	102.462	106.406	90.3479	109.153	101.44	91.3562	112.489	103.008	115.325	98.5585	103.931
44	2448.3	1944.13	2089.08	2109.95	2077.57	2106.06	2036.25	2433.4	3203.4	1865.64	2748.78	1944.55	3305.48	1509	3282.21	3462.67	2679.16	1890.78	1970.92	1873.77	1389.59	1674.81	3651.63	1896.25	1435.35	1956.6	1575.94	1461.87	1742.15	2342.53	1219.61	2261.89	2863.22		95.1081	99.7161	96.7887	96.9817	102.144	107.292	90.2483	109.153	101.315	91.6399	112.621	102.712	115.825	98.3991	103.963
45	2459.24	1942.37	2098.72	2115.74	2077.09	2103.6	2034	2425.19	3199.46	1871.44	2741.99	1944.71	3325.64	1506.56	3281.27	3467.75	2684.53	1900.12	1977.36	1871.65	1394.11	1682.69	3652.32	1903.97	1435.34	1953.29	1584.05	1459.98	1753.47	2341.18	1217.58	2266.99	2856.55		95.533	99.6256	97.2353	97.2476	102.585	107.167	90.5193	108.784	100.936	91.5624	112.343	102.72	116.532	98.5869	103.934
46	2483.28	1959.96	2091.24	2108.64	2088.69	2103.43	2040.11	2434.38	3187.46	1869.85	2747.05	1954.41	3341.41	1509.43	3287.06	3470.53	2690.54	1902.64	1994.23	1872.4	1394.33	1668.64	3638.14	1904.16	1439.66	1946.98	1575.7	1456.5	1742.78	2342.4	1209.07	2274.12	2849.86		96.467	100.528	96.889	96.9215	102.587	107.158	90.888	109.197	100.99	91.4673	112.55	103.233	117.084	99.1127	104.117
47	2470.94	1949.11	2109.5	2098.16	2082.2	2105.82	2048.42	2432.25	3189.19	1867.91	2744.04	1945.1	3334.88	1517.48	3277.13	3465.22	2688.44	1900.8	1994.65	1875.18	1394.89	1670.56	3650.67	1907.92	1443.46	1946.4	1580.63	1467.69	1743.62	2335.44	1214.73	2266.34	2841.01		95.9874	99.9715	97.7348	96.4399	102.538	107.28	90.6248	109.101	100.938	91.9131	112.427	102.741	116.855	99.2224	103.802
48	2455.18	1948.98	2107.7	2109.12	2091.19	2111.09	2042.49	2435.02	3187.53	1877.02	2743.28	1946.3	3352.26	1519.16	3273.53	3468.97	2696.94	1905.25	2000.68	1878.01	1392.5	1672.59	3630.43	1916.91	1446.12	1955.53	1579.9	1466.35	1735.08	2334.35	1207.7	2268.66	2844.4		95.3752	99.9644	97.6516	96.9433	102.747	107.549	92.1755	109.226	100.909	92.0189	112.396	102.805	117.464	99.3624	103.688
49	2447.77	1959.79	2110.72	2107.41	2091.24	2100.73	2077.44	2432.96	3186.61	1879.18	2744.25	1961.67	3359.75	1521.3	3247.44	3468.98	2697.22	1907.9	1998.11	1879.96	1392.29	1667.69	3636.08	1898.28	1448.58	1948.66	1582.3	1458.59	1741.51	2329.42	1209.82	2264.25	2842.19		95.0876	100.519	97.7913	96.865	103.086	107.021	92.4928	109.133	100.807	92.3513	112.436	103.616	117.727	99.5602	102.862
50	2447.85	1966.09	2109.03	2114.19	2090.24	2103.81	2084.59	2452.91	3183.41	1885.96	2748.42	1948.75	3374.85	1524.33	3251.64	3481.39	2707.89	1919.81	2008.42	1878.51	1391.84	1667.51	3633.46	1904.69	1447.57	1948.15	1580.28	1464.71	1740.28	2333.96	1216.04	2272.24	2825.42		95.0905	100.842	97.7131	97.1764	102.93	107.177	92.3028	110.028	100.243	91.9465	112.607	102.934	118.256	99.303	102.995
51	2450.71	1961.31	2103.42	2121.71	2094.49	2112.73	2080.31	2420.11	3165.58	1877.7	2733.72	1963.65	3378.86	1520.4	3241.5	3483.69	2711.39	1909.73	2000.05	1884.81	1392.08	1674.73	3630.97	1914.39	1449.07	1953.3	1581.55	1461.51	1745.52	2337.68	1205.65	2273.74	2832.85		95.2016	100.597	97.453	97.5222	103.28	107.632	92.4568	108.557	99.839	91.2209	112.004	103.721	118.396	99.8947	102.674
52	2440.69	1968.47	2110.78	2122.34	2101.41	2117.03	2083.78	2449.96	3152.83	1862.88	2739.94	1955.82	3390.29	1529.45	3229.91	3486.21	2715.43	1922.48	2007.84	1885.28	1398.75	1677.33	3628.02	1897.96	1441.21	1946.73	1574.57	1467.23	1742.96	2332.03	1202.01	2268.78	2823.57		94.8124	100.964	97.7941	97.5512	102.584	107.851	93.1965	109.896	99.5246	90.9769	112.259	103.307	118.797	100.048	102.307
53	2441.87	1966.36	2108.44	2118.17	2098.23	2103.17	2100.45	2435.42	3142.91	1857.9	2739.67	1957.6	3401.61	1531.79	3234.9	3481.21	2728.52	1922.67	2028.84	1902.53	1394.75	1671.07	3620.46	1897.19	1443.85	1953.78	1578.83	1450.09	1743.77	2327.91	1196.7	2272.14	2814.47		94.8583	100.856	97.6856	97.3595	103.078	107.145	92.5417	109.244	99.2177	90.6809	112.248	103.401	119.194	100.051	102.465
54	2437.37	1971.91	2111.17	2116.71	2105.37	2116.3	2085.69	2435.27	3133.21	1851.85	2728.86	1959.55	3409.1	1531.84	3240.55	3488.93	2736.71	1925.75	2023.3	1898.14	1399.23	1665.38	3608.71	1906.8	1446.52	1954.34	1575.43	1469.87	1744.02	2335.56	1206.56	2277.23	2818.78		94.6836	101.141	97.8124	97.2925	102.773	107.814	92.5235	109.237	99.1177	91.2335	111.805	103.504	119.456	100.335	102.644
55	2423.94	1981.6	2115.3	2128.34	2091.18	2107.01	2085.28	2440.79	3130.06	1863.14	2742.25	1952.26	3412.36	1536.19	3253.39	3497.05	2736.58	1918.43	2033.34	1905.86	1398.7	1667.88	3621.1	1903.32	1447.8	1952.22	1581.52	1462.87	1733.78	2337.06	1198.28	2268.85	2808.99		94.1617	101.638	98.0036	97.827	102.9	107.341	92.9694	109.484	99.3147	91.229	112.354	103.119	119.57	100.258	103.05
56	2425.94	1978.84	2107.89	2115.35	2101.24	2120.66	2095.33	2442.15	3136.28	1863.05	2741.71	1957.12	3416.6	1535.01	3245.04	3490.8	2733.83	1933.71	2042.01	1912.41	1401.52	1672.24	3625.95	1902.85	1450.64	1949.29	1585.64	1459.5	1745.08	2332.72	1203.51	2257.33	2799.08		94.2397	101.496	97.6604	97.2298	102.911	108.036	92.8614	109.545	99.0453	91.4784	112.332	103.376	119.719	100.143	102.786
57	2427.95	1984.6	2106.57	2121.87	2095.02	2121.97	2092.9	2446.56	3127.77	1868.14	2739.16	1959.45	3416.59	1533.25	3248.08	3483.17	2731.97	1933.63	2037.32	1905.87	1404.43	1675.06	3627.3	1901.31	1448.36	1953.24	1585.1	1455.49	1741.48	2345.4	1202.73	2246.94	2820.95		94.3174	101.792	97.5991	97.5297	102.476	108.103	93.1017	109.743	99.4982	91.6799	112.227	103.499	119.719	100.355	102.882
58	2424.93	1977.81	2099.6	2115.79	2097.61	2121.49	2098.31	2438.14	3142.07	1872.25	2739.05	1960.01	3414.37	1536.5	3249.49	3474.16	2737.36	1928.15	2031.61	1901.91	1403.13	1675.87	3629.22	1903.44	1441.62	1955.48	1593.33	1454.76	1742.19	2356.78	1198.6	2259.85	2813.48		94.2003	101.443	97.276	97.2499		108.078	93.3478	109.365	98.7504	91.3715	112.223	103.528	119.641	100.185	102.927
59	2430.8	1978.54	2105.82	2120.85	2097.84	2119.13	2103.86	2450.8	3118.46	1865.96	2747.89	1958.98	3429.48	1533.91	3258.95	3463.52	2741.28	1941	2052.11	1908.54	1407.3	1674.9	3622.31	1911.3	1445.52	1957.96	1583.78	1450.02	1731.06	2344.95	1198.55	2243.51	2823.62		94.4282	101.481	97.5644	97.4824		107.958	93.303	109.934	98.687	91.5443	112.585	103.475	120.17		103.227
60	2437.31	1980.34	2093.63	2113.25	2088.98	2119.91	2102.85	2452.59	3116.45	1869.49	2751.91	1964.07	3414.89		3257.48	3462.53	2749.42	1939.51	2049.43	1903.79	1406.53	1672.77	3630.69	1915.43	1443.4	1952.81	1586.24	1449.74	1728.89	2344.73	1206.87	2267.93	2822.8		94.681	101.573	96.9995	97.1334		107.998		110.014			112.75	103.743	119.659		103.18
[truncated: 23 more columns]

## Sheet: CK-666 20181030 
	3	3	3	5	5	5	5	5	7	7	7	7	8	8	9	9	9	10	10	11	11	11	3	4	4	6	6	7	7	8	8	8	10.1	10.1	10.3	11	11		3	3	3	5	5	5	5	5	7	7	7
	2	3	9	3	4	7	8	13	1	3	5	17	2	4	1	2	11	6	9	5	7	9	13	2	4	4	9	5	6	4	6	7	1	2	3	7	9		2	3	9	3	4	7	8	13	1	3	5
0	2657.57	1834.38	1524.59	1301.61	1870.95	1870.05	1775.3	1332.08	1714.11	1400.52	2214.21	1211.71	1526.93	1418.36	1712.86	2731.05	1838.72	1403.4	1599.57	1783.55	1768.36	2556.54	1865.4	1797.71	1111.15	1639.29	1570.4	1617.49	1837.8	1623.53	1403.69	1625.68	1884.43	1052.11	1241.08	1164.19	1155.41		100	100	100	100	100	100	100	100	100	100	100
1	2650.09	1823.18	1538.66	1296.83	1857.24	1873.85	1770.41	1317.01	1690.44	1385.74	2213.22	1202.13	1532.16	1430.54	1710.26	2722.69	1818.75	1383.85	1589.01	1792.07	1761.45	2562.74	1860.02	1774.61	1122.23	1615.46	1554.98	1620.41	1830.84	1597.38	1390.72	1613.47	1880.56	1056.09	1242.06	1172.07	1164.94		99.2889	99.2226	100.922	99.5073	99.2672	100.481	99.7246	99.622	98.6186	99.0472	99.9554
2	2634.93	1817.22	1514.66	1285.19	1858.2	1874.48	1767.75	1302.85	1670.2	1379.39	2203.81	1209.84	1515.91	1427.06	1704.14	2715.42	1806.12	1376.29	1585.4	1797.55	1757.71	2573.78	1840.47	1758.5	1133.87	1588.31	1548.23	1606.82	1818.19	1593.49	1395.96	1598.1	1895.26	1052.29	1253.52	1170.41	1159.11		98.4655	99.4879	99.3486	99.2667	99.3189	100.833	99.5749	98.6342	97.4384	98.822	99.5304
3	2640.97	1819.35	1486.08	1286.22	1843.82	1894.26	1765.77	1292.57	1659.92	1366.24	2193.94	1208.44	1516.42	1418.23	1688.14	2710.72	1778.88	1369.22	1573.98	1794.74	1755.02	2584.29	1831.42	1747.7	1133.75	1575.72	1537.11	1602	1800.52	1592.78	1390.84	1593.28	1881.17	1065.94	1271.51	1171.3	1162.22		97.9725	98.5743	97.4741	99.1232	98.55	101.184	99.463	98.0988	96.8384	98.8192	99.0844
4	2620.44	1805.2	1485.97	1279.89	1822.39	1903.37	1759.4	1272.86	1645.04	1363.14	2191.59	1207.08	1496.88	1416.87	1693.24	2701.58	1769.79	1363.97	1559.96	1800.93	1749.1	2574.29	1814.92	1731.62	1144.97	1556.7	1534.17	1599.26	1800.27	1570.45	1392.4	1599.22	1876.83	1058.23	1285	1176.67	1147.22		97.4191	98.6182	97.4664	99.0275	97.4049	101.571	99.1043	98.1629	95.9703	98.7621	98.9784
5	2602.55	1810.03	1478.92	1276.79	1808.91	1910.04	1758.5	1263.34	1640.23	1363.1	2192.5	1203.29	1499.64	1416.76	1695.82	2699.39	1746.61	1355.18	1554.36	1811.8	1745.92	2569.53	1811.71	1725.19	1150.41	1551.71	1522.54	1590.97	1803.19	1557.18	1393.38	1586.4	1869.81	1037.97	1294.84	1178.25	1151.25		97.3116	98.087	97.0042	98.9978	96.6841	102.226	99.0538	97.0857	95.6896	99.4229	99.0193
6	2595.78	1793.41	1465.5	1274.94	1788.17	1916.69	1761.72	1251.03	1630.93	1362.31	2193.78	1202.63	1471.12	1405.67	1689.35	2701.9	1726.49	1359.48	1542.09	1815.48	1735.89	2571.03	1787.98	1713.48	1152	1537.78	1526.96	1576.05	1795.8	1561.21	1404.63	1587.46	1864.32	999.952	1303.81	1173.3	1146.43		96.7521	97.1242	96.1239	98.9167	95.5756	102.917	99.2351	97.7049	95.1472	99.2714	99.0774
7	2580.88	1794.21	1435.68	1273.71	1761.38	1924.03	1759.36	1243.74	1616.86	1371.43	2193.25	1199	1459.44	1383.43	1695.66	2700.01	1715.48	1349.2	1533.23	1806.67	1737.56	2556.5	1781.59	1712.47	1156.77	1533.68	1521.33	1584.3	1804.34	1554.12	1418.17	1584.12	1868.46	1012.62	1324.28	1174.75	1149.98		96.9005	97.2518	94.1681	99.1184	94.1435	103.24	99.1022	97.5201	94.3261	99.5273	99.0534
8	2562.52	1784.54	1430.93	1273.33	1740.11	1936.43	1752.27	1239.03	1610.87	1369.34	2184.44	1202.5	1455.56	1368.78	1696.11	2700.51	1703.42	1343.75	1521.28	1799.84	1727.97	2545.38	1785.88	1709.99	1159.53	1534.53	1514.88	1580.28	1806.07	1546.03	1415.86	1571.53	1864.54	983.719	1327.94	1164.83	1147.62		96.5269	96.1178	93.8568	98.3996	93.0066	103.6	98.7028	96.0017	93.9766	98.5488	98.6554
9	2541.27	1767.03	1431.87	1272.29	1719.68	1949.52	1747.85	1226.75	1595.82	1372.87	2182.14	1203.37	1446.14	1351.34	1699.03	2696.15	1696.48	1345.1	1518.83	1797.41	1729.64	2524.24	1802.52	1701.7	1165.82	1528.55	1516.47	1568.52	1814	1536.21	1429.35	1573.77	1864.45	981.812	1340.92	1163.5	1133.15		96.8752	95.7561	93.9181	98.1905	91.915	103.574	98.4536	96.6877	93.0989	98.7165	98.5516
10	2528.55	1769.35	1388.56	1274.88	1702.25	1955.65	1743.1	1220.09	1599.24	1359.37	2167.81	1197.27	1442.85	1341.07	1696.66	2694.46	1690.06	1340.3	1510.56	1800.76	1730.77	2498.92	1779.22	1695.17	1157.54	1533.34	1507	1568.37	1823.2	1540.67	1437.15	1560.86	1869.15	964.229	1360.08	1159.08	1133.1		96.9124	95.0123	91.0776	98.3717	90.9832	103.921	98.1864	94.9549	93.2982	99.2171	97.9043
11	2514.27	1748.72	1381.02	1265.64	1688.19	1962.46	1729.85	1220.89	1590.21	1361.68	2169.35	1188.64	1441.73	1334.74	1695.45	2691.42	1685.46	1352.18	1499.5	1790	1727.33	2467.67	1792.2	1696.94	1163.3	1528.55	1515.92	1572.78	1830.96	1532.44	1460.53	1558.04	1864.73	965.109	1383.67	1149.66	1138.4		96.8116	94.506	90.5828	98.3427	90.2317	103.557	97.4398	95.4703	92.7717	98.418	97.974
12	2511.49	1742.14	1382.3	1262.95	1676.15	1961.97	1718.28	1207.49	1586.03	1368.59	2167.4	1188.03	1429.76	1326.07	1691.33	2682.63	1687.49	1345.42	1501.84	1785	1722.03	2441.32	1789.6	1683.85	1161.4	1529.07	1509.37	1577.79	1841.91	1526.23	1473.58	1563.72	1869.77	956.626	1402.6	1154.42	1129.45		96.2029	93.8261	90.6667	97.5736	89.5882	103.793	96.788	97.3012	92.5276	99.0221	97.886
13	2497.05	1728.6	1368.6	1265.28	1659.55	1968.53	1707.77	1215.19	1578.83	1357.57	2154.82	1179.3	1433.08	1311.38	1672.22	2675.19	1686.33	1346.58	1495.63	1782.68	1727.5	2404.86	1772.8	1677.42	1162.11	1525.6	1501.98	1563.28	1838.99	1528.07	1474.35	1543.15	1862.72	951.19	1420.26	1152.72	1139.29		96.4317	93.5385	89.7682	96.9312	88.7013	103.83	96.1961	95.8182	92.1074	98.2093	97.3177
14	2500.88	1719.39	1363.5	1264.91	1646.76	1961.64	1699.72	1212.89	1574.57	1365.9	2161.4	1182.82	1432.81	1306.23	1668.2	2666.04	1691.39	1348.21	1490.52	1770.84	1725.56	2371.78	1771.72	1683.03	1168.01	1521.9	1484.04	1567.8	1839.76	1522.22	1485.89	1544.66	1854.17	953.786	1426.92	1151.85	1134.47		96.4433	92.618	89.4341	96.5763	88.0173	104.263	95.7429	95.7758	91.859	98.364	97.6147
15	2491.24	1707.02	1369.87	1255.01	1633.4	1966.11	1681.26	1194.01	1573.08	1354.69	2159.66	1175.37	1440.29	1298.12	1661.61	2655.39	1694.33	1351.72	1475.98	1767.25	1723.22	2353.36	1777.95	1672.86	1164.7	1514.24	1500.25	1560.35	1848.4	1505.04	1491.16	1548.22	1849.79	955.775	1442.32	1144.23	1141.95		96.6106	91.7463	89.8519	97.3935	87.3035	104.669	94.7029	95.225	91.7723	98.0462	97.5363
16	2500.23	1701.79	1376.13	1246.75	1616.72	1966.82	1681.88	1202.54	1573.33	1356.82	2158.61	1177.82	1443.26	1297.87	1659.62	2632.47	1712.8	1354.04	1475.39	1757.77	1727.68	2342.72	1772.74	1679.71	1170.59	1511.65	1488.48	1540.1	1854.59	1500.38	1492.53	1537.74	1837.89	944.732	1446.9	1146.71	1150.46		96.8198	90.6637	90.2623	97.6907	86.4121	104.853	94.7379	97.31	91.787	98.4596	97.4887
17	2501.19	1685.04	1374.64	1242.19	1603.96	1975.01	1664.91	1180.99	1560.66	1352.44	2162.7	1170.91	1439.95	1293.25	1660.14	2609.86	1716.1	1346.34	1472.02	1747.46	1727.74	2324.64	1788.54	1682.42	1168.16	1503.91	1497.15	1537.26	1853.84	1512.93	1510.61	1538.48	1845.05	936.747	1470.78	1133.06	1153.27		96.8543	89.8738	90.1642	96.693	85.7298	105.288	93.7818	96.9842	91.0477	98.0915	97.6738
18	2498.59	1669.18	1369.3	1252.7	1587.87	1982.7	1662.69	1187.4	1566.38	1358.14	2157.31	1172.17	1454.39	1288.85	1651.88	2595.8	1728.34	1356.79	1458.64	1740.9	1732.88	2308.12	1783.15	1682.99	1168.75	1505.97	1490.17	1524.98	1863.21	1486.15	1492.05	1532.13	1836.4	933.866	1476.44	1133.01	1147.89		97.0151	89.4878	89.8143	96.8208	84.8698	105.518	93.6571	97.4221	91.3811	98.441	97.43
19	2482.88	1649.49	1375.08	1256.52	1604.9	1986.2	1658.24	1210.17	1571.99	1353.06	2152.38	1180.81	1459.85	1283.2	1651.29	2587.07	1724.4	1353.21	1454.52	1739.76	1742.19	2304.87	1789.43	1675.34	1179.17	1493.27	1479.03	1518.88	1851.99	1490.33	1484.42	1541.49	1827.32	931.901	1473.86	1132.22	1148.2		97.4713	88.5811	90.1933	97.0117	85.7802	104.828	93.4064	97.0081	91.7086	98.0115	97.2076
20	2488.78	1635.12	1362.82	1243.69	1596.57	1994.43	1647.99	1191.72	1571.03	1357.88	2150.98	1182.35	1464.27	1288.49	1638.83	2577.69	1731.03	1350.5	1454.73	1736.35	1731.66	2299.27	1793.53	1682.7	1176.35	1499.02	1490.6	1518.98	1864.34	1480.9	1486.18	1532.71	1826.58	933.193	1496.88	1125.28	1143.3		97.2737	88.3033	89.389	96.9809	85.3347	105.377	92.8291	97.2086	91.6529	98.3	97.1441
21	2489.08	1628.09	1358.88	1245.33	1585.44	1998.79	1642.8	1191.2	1570.75	1351.96	2144.81	1167.71	1463.66	1286.99	1635.33	2565.75	1738.35	1346.53	1451.49	1736.65	1734.26	2293.2	1806.07	1686.61	1175.35	1489.99	1484.41	1511.49	1859.76	1467.66	1488.66	1538.2	1826.68	933.96	1495.48	1133.37	1156.84		97.6221	87.5031	89.131	96.6802	84.7401	105.673	92.5368	97.447	91.6362	99.394	96.8654
22	2493.4	1611.6	1333.73	1247.79	1582.96	1985.71	1648.68	1184.35	1576.55	1355.94	2141.13	1166.9	1464.83	1284.67	1627.07	2553.93	1744.57	1355.39	1450.58	1733.3	1738.95	2295.28	1800.87	1688.38	1182.06	1514.07	1484.46	1518.41	1861.33	1460.62	1485.36	1527.3	1819.98	940.655	1500.64	1123.1	1159.4		97.6531	87.2704	87.4811	97.5839	84.6072	105.917	92.8677	96.6108	91.9749	99.0531	96.6995
23	2498.8	1606.54	1349.35	1247.39	1585.76	1996.11	1648.63	1210.28	1577.36	1371.03	2138.52	1177.37	1472.12	1283.81	1635.91	2555.06	1756.31	1348.22	1441.99	1716.26	1737.59	2288.16	1809.1	1697.85	1169.57	1496.58	1482.3	1512.97	1859.5	1462.04	1484.24	1537.03	1819.95	940.661	1499.8	1132.65	1167.86		98.4247	87.2514	88.5054	96.7533	84.7568	105.097	92.8648	97.8606	92.0219	98.9318	96.5818
24	2499.69	1591.98	1351.41	1243.52	1567.97	2001.73	1639.84	1206.23	1566.68	1366.33	2134.98	1161.71	1468.94	1280.01	1636.39	2562.53	1770.75	1344.39	1443.77	1717.16	1739.6	2285.56	1794.02	1701.23	1177.49	1479.69	1483.03	1511.29	1851.17	1451.07	1481.16	1530.08	1819.43	945.76	1501.7	1124.7	1164.54		98.2561	86.9196	88.6405	95.5259	83.8064	104.872	92.3699	97.6316	91.3989	99.1012	96.4217
25	2503.84	1587.75	1350.56	1255.15	1572.25	2006.35	1639.83	1211.67	1578.22	1364.65	2141.25	1161.88	1479.33	1283.4	1648	2547.47	1774.36	1342.56	1437.13	1711.86	1741.45	2277.29	1815.26	1699.09	1179.32	1474.4	1487.06	1506.45	1856.48	1452.44	1483.43	1533.34	1824.09	943.337	1488.95	1132.72	1178.79		98.4957	86.5558	88.5852	95.5287	84.0349	104.546	92.3691	99.1528	92.072	99.4607	96.7049
26	2515.61	1587.41	1357.97	1244.46	1565.5	1990.81	1635.67	1206.52	1583.82	1366.99	2136.55	1154.68	1485.89	1279.51	1654.76	2545.14	1790.57	1344.23	1429.76	1712.06	1739.27	2279.94	1808.21	1690.05	1180.2	1467.17	1488.34	1498.11	1855.09	1446.35	1478.01	1537.2	1821.43	952.103	1495.89	1125.5	1181.71		98.3328	85.9972	89.0709	95.5114	83.6739	104.082	92.1349	98.1813	92.3988	98.9119	96.4925
27	2510.51	1581.37	1348.91	1228.68	1562.76	1986.56	1635.29	1209.02	1587.75	1371.95	2124.34	1160.64	1484.11	1286.86	1671.15	2544.81	1802.14	1345.06	1424.11	1712.74	1746.52	2275.24	1812.03	1698.09	1175.7	1472.37	1480.88	1495.03	1837.8	1442.7	1478.06	1536.12	1814.62	948.696	1481.36	1116.48	1182.26		98.4366	85.8644	88.4765	95.2733	83.5276	104.274	92.1135	98.864	92.6281	99.4363	95.9414
28	2519.51	1574.75	1358.98	1228.71	1558.24	1980.37	1639.12	1211.98	1581.75	1364.38	2128.69	1166.65	1489.59	1287.72	1677.71	2553.2	1818.01	1341.57	1419.51	1711	1745.27	2277.59	1823.59	1688.84	1192.18	1476.6	1488.3	1496.42	1824.94	1437.31	1471.6	1546.26	1815.59	957.872	1474.83	1129.52	1187.61		98.207	85.935	89.137	94.7481	83.286	104.235	92.329	99.4204	92.2781	98.6544	96.1376
29	2520.31	1564.59	1342.34	1228.49	1554.84	1971.59	1634.5	1201.58	1582.42	1371.61	2140.68	1167.07	1503.77	1287.83	1670.89	2551.82	1827.97	1336.62	1416.18	1699.86	1715.06	2338.95	1854.52	1698.4	1187.92	1465.51	1478.87	1487.2	1805.14	1426.13	1474.87	1546.6	1807.76	959.879	1472.66	1120.25	1192.15		98.529	86.3249	88.0459	94.6671	83.1043	103.884	92.0689	98.5448	92.3169	98.1904	96.6792
30	2540.22	1562.17	1342.17	1225.43	1558.23	1975.23	1636.09	1217.13	1585.7	1360.82	2139.08	1160.55	1495.32	1284.34	1661.52	2557.96	1847.41	1340.56	1410.38	1686.71	1717.36	2330.56	1821.43	1688.3	1188.4	1467.05	1477.15	1486.55	1791.23	1421.3	1471.17	1550.33	1809.94	968.624	1467.06	1125.87	1202.29		98.3108	85.9236	88.0345	94.564	83.2854	102.78	92.1587	99.2385	92.5086	98.7618	96.6067
31	2535.87	1563.46	1363.63	1218.67	1558.64	1974.49	1623.42	1214.28	1586.33	1354.43	2127.83	1153.9	1510.06	1287.04	1653.8	2558.54	1860.49	1330.13	1413.08	1688.33	1728.31	2340.06	1820.89	1687.85	1193.03	1461.48	1474.03	1484.41	1790.44	1427.3	1477.18	1551.49	1811	969.974	1476.23	1120.64	1198.65		98.9432	85.2627	89.4421	94.5681	83.3077	102.868	91.445	98.4129	92.5451	98.9538	96.0989
32	2542.05	1570.55	1364.77	1217.63	1558.38	1967.83	1642.02	1233.2	1592.84	1362.31	2130.3	1165.91	1512.41	1284.86	1649.1	2566.62	1871.68	1326.89	1402.4	1683.41	1718.21	2340.26	1829.85	1685.05	1196.54	1468.43	1472.26	1492.22	1784.53	1425.24	1471.85	1553.52	1805.18	975.59	1465.07	1123.65	1190.91		99.7912	85.3923	89.5172	94.528	83.2934	102.247	92.4927	98.1465	92.9249	99.111	96.2103
33	2537.85	1563.25	1374.04	1216.3	1562.72	1946.93	1640.62	1221.12	1587.14	1364.96	2124.05	1170.9	1513.49	1284.23	1649.34	2572.61	1875.03	1325.2	1407.56	1689.81	1716.48	2346.52	1853.53	1680.46	1203.7	1472.29	1469.64	1484.91	1768.82	1413.43	1467.67	1553.08	1808.4	977.83	1469.98	1130.19	1198.39		99.4369	85.7744	90.1252	94.8796	83.5257	101.995	92.414	98.8194	92.5923	98.9443	95.9281
34	2540.53	1551.22	1358.99	1216.36	1560.46	1948.6	1637.88	1229.61	1580.35	1367.12	2134.79	1171.84	1510.83	1281.28	1654.82	2574.76	1894.78	1319.65	1403.29	1695.34	1723.58	2353.72	1842.74	1686.48	1209.08	1460.06	1459.89	1495.16	1757.27	1413.62	1458.49	1566.81	1810.74	965.909	1464.3	1135.06	1209.15		100.209	85.3063	89.1382	94.2117	83.405	102.29	92.2595	98.5857	92.1961	99.4871	96.4133
35	2534.6	1553.58	1363.39	1215.84	1566.52	1936.83	1641.61	1236.53	1587.82	1364.82	2145.29	1174.97	1527.9	1280.93	1651.6	2578.47	1896.98	1323.8	1405.82	1695.76	1730.57	2351.8	1847.37	1672.18	1208.42	1464.66	1473.18	1482.81	1749.98	1412.2	1467.26	1567.18	1822.73	978.226	1455.14	1131.37	1205.36		99.8555	85.4148	89.4263	93.6546	83.7289	102.318	92.4697	98.6723	92.6319	99.5159	96.8874
36	2542.91	1560.53	1390.85	1220.36	1570.67	1932.06	1642.45	1225.64	1591.58	1372.31	2139.01	1184.39	1531.56	1284.39	1647.95	2586.99	1902.26	1321.04	1399.01	1691.9	1716.6	2349.23	1839.31	1667.22	1205.07	1459.68	1468.77	1478.97	1745.22	1407.73	1465.12	1572.53	1820.71	977.318	1458.56	1136.1	1202.22		99.84	86.2794	91.228	93.8615	83.9505	101.93	92.517	99.284	92.8516	99.717	96.6036
37	2537.28	1552.02	1366.59	1211.77	1574.55	1937.64	1644.72	1234.26	1595.28	1372.71	2133.68	1177.95	1529.93	1289.91	1642.16	2585.56	1902.55	1324.79	1403.97	1688.82	1725.35	2351.48	1844.12	1664.22	1205.35	1459.75	1464.87	1474.48	1736.5	1420.14	1473.26	1581.42	1825.57	985.564	1455.9	1141.86	1212.68		99.7708	86.4311	89.6367	93.2815	84.1576	101.898	92.6448	98.822	93.0673	99.9868	96.3629
38	2553.6	1553.99	1374.77	1204.61	1575.07	1938.18	1637.92	1224	1597.87	1375.48	2125.28	1175.55	1531.96	1290.01	1650.89	2575.07	1915.75	1317.42	1392.64	1683.48	1721.89	2352.41	1843.61	1667.36	1211.06	1460.38	1470.73	1481.43	1738.39	1414.59	1464.71	1576.47	1834.66	985.036	1459.37	1141.43	1212.68		99.9328	86.0132	90.1729	93.7753	84.1855	101.722	92.2619	99.1171	93.2182	100.039	95.9837
39	2575.49	1569.72	1378.59	1207.27	1575.66	1930.82	1651.1	1220.68	1588.93	1379.21	2134.82	1185.94	1526.53	1297.06	1643.83	2583.19	1909.55	1319.16	1389.48	1662.26	1720.72	2351.49	1853.85	1667.37	1240.09	1455.25	1465.94	1480.62	1747.83	1423.75	1472.01	1598.32	1845.36	986.57	1455.45	1136.11	1211.95		100.313	86.181	90.4236	94.2897	84.2173	101.802	93.0041	99.8925	92.6968	100.659	96.4146
40	2566.34	1572.48	1396.07	1199.81	1577.89	1930.21	1646.1	1229.05	1597.98	1379.92	2126.5	1182.56	1525.48	1289.51	1660.39	2575.47	1904.12	1318.51	1390.83	1663.01	1722.01	2353.05	1845.45	1651.29	1211.12	1453.72	1474.24	1483.5	1748.34	1431.63	1469.41	1606.69	1850.68	984.126	1459.06	1141.55	1212.31		100.542	85.7825	91.5698	94.194	84.3363	101.472	92.7222	99.5216	93.2248	100.461	96.0386
41	2586.27	1564.88	1388.58	1206.16	1583.06	1926.89	1652.25	1226.15	1590.43	1388.48	2128.01	1186.71	1530.57	1295.21	1655.63	2586.62	1893.72	1326.68	1402.5	1656.64	1714.77	2361.17	1851.15	1646.19	1210.21	1459.75	1472.17	1472.79	1750.33	1425.91	1469.46	1609.36	1855.97	990.445	1453.55	1139.42	1207.49		100.973	85.7537	91.0788	94.7107	84.6127	101.569	93.0687	99.2631	92.7846	100.842	96.1069
42	2577.15	1567.93	1392.39	1212.78	1578.73	1928.39	1662.92	1227.22	1592.76	1385.74	2122.04	1186.63	1526.83	1296.59	1661.11	2585.33	1880.06	1327.5	1394.22	1653.04	1726.19	2355.27	1843.15	1644.64	1213.64	1448.16	1472.85	1474.01	1755.13	1427.3	1472.97	1607.05	1860.97	991.018	1449.22	1146.58	1198.47		100.745	85.5201	91.3284	94.91	84.3814	101.795	93.6701	98.921	92.9203	101.17	95.8373
43	2576.75	1560.68	1398.12	1211.54	1583.81	1922.15	1670.81	1234.83	1592.7	1391	2125.25	1197.86	1521.96	1293.96	1660.7	2583.25	1872.37	1324.62	1399.29	1650.67	1719.57	2366.28	1842.03	1647.52	1212.17	1459.92	1475.72	1471.15	1762.95	1428.23	1471.65	1618.57	1868.85	990.105	1448.93	1149.93	1207.06		101.069	85.4723	91.7045	94.671	84.6529	102.027	94.1146	99.2953	92.9169	101.068	95.9821
44	2574.96	1560.16	1400.39	1218.19	1594.56	1923.98	1667.56	1229.08	1587.37	1395.52	2118.37	1192.11	1513.17	1287.21	1660.31	2589.26	1854.32	1335.21	1392.35	1644.41	1732.7	2354.51	1840.12	1652.24	1207.57	1454.69	1471.18	1472.79	1763.16	1425.62	1468.42	1618.98	1877.66	988.569	1452.75	1149.39	1207.1		101.197	85.6035	91.8533	94.0575	85.2273	102.243	93.9314	98.8425	92.6062	101.74	95.6714
45	2579.14	1555.91	1401.09	1220.75	1590.12	1928.27	1670.71	1232.75	1581.51	1394.12	2108.21	1185.43	1507.08	1287.83	1669.07	2588.24	1842.29	1333.41	1398.27	1648.16	1729.29	2357.73	1840.08	1638	1200.51	1459.22	1470.46	1464.87	1766.41	1423.91	1470.23	1614.1	1879.37	996.814	1450.98	1155.63	1203.14		101.03	85.1934	91.8994	93.7678	84.99	102.536	94.1089	98.6504	92.2642	101.995	95.2127
46	2588.94	1555.04	1419.49	1217.68	1601.03	1932.67	1685.18	1242.4	1591.89	1403.38	2120.49	1197.07	1513.58	1296.56	1672.99	2604.15	1836.18	1328.54	1396.95	1651.1	1726.69	2360.55	1850.6	1641.62	1199.72	1459.46	1469.08	1455.11	1777.51	1419.6	1471.42	1631.75	1885.24	1004.54	1449.16	1152.8	1214.74		101.196	85.37	93.1061	93.7179	85.5734	102.931	94.9236	99.1548	92.8696	101.873	95.7674
47	2594.86	1557.42	1430.03	1209.79	1601.67	1936.76	1687.56	1237.79	1601.16	1406.9	2109.01	1192.92	1512.6	1302.5	1676.63	2604.23	1840.53	1333.47	1403.4	1651.73	1733.65	2359.57	1836.02	1651.08	1187.34	1460.73	1473.47	1463.03	1787.29	1424.7	1471.21	1638.25	1897.45	1002.73	1445.13	1157.81	1225.15		101.091	85.0861	93.7978	93.7326	85.6074	102.65	95.0577	99.0118	93.4105	102.486	95.249
48	2606	1549.96	1427.53	1206.06	1601.66	1942.3	1692.37	1234.57	1593.46	1405.22	2117.14	1186.07	1503.08	1302.43	1669.6	2608.26	1830.04	1328.52	1414.04	1657.03	1734.2	2357.65	1851.7	1637.91	1188.3	1464.32	1464.97	1465.86	1787.38	1420.31	1476.66	1633.42	1899.48	1001.74	1445.88	1155.52	1217.05		101.916	85.1613	93.6338	93.2924	85.6071	103.19	95.3286	99.4222	92.9613	103.569	95.6159
49	2600.11	1553.18	1424.75	1205.42	1609.9	1949.78	1697.7	1230.32	1605.76	1413.68	2116.73	1189.44	1458.61	1304.71	1680.26	2599.1	1823.72	1335.15	1399.15	1648.77	1733.26	2352.2	1850.86	1635.48	1187.61	1457.92	1470.32	1455.34	1798.24	1419.26	1468.16	1637.61	1907.05	991.323	1442.53	1156.73	1214.82		101.788	84.5092	93.4512	93.4553	86.0473	103.015	95.6292	100.632	93.6788	104.465	95.5973
50	2608.48	1548.01	1430.35	1205.61	1617.88	1944.47	1692.97	1234.97	1602.96	1428.62	2127.83	1194.32	1456.51	1300.13	1683.71	2606.44	1825.58	1326.02	1407.83	1657.09	1733.03	2354.79	1857.74	1634.49	1185.15	1464	1474.98	1452.8	1790.37	1424.07	1474.52	1652.41	1920.68	1000.91	1453.09	1162.9	1215.92		101.806	84.91	93.8186	94.0229	86.4736	102.564	95.3623	100.663	93.5153	104.005	96.0988
51	2611.77	1549.38	1429.23	1199.95	1618.36	1954.69	1692.79	1229.34	1610.82	1440.98	2128.52	1193.32	1456.38	1306.23	1683.72	2606.69	1814.33	1319.47	1407.23	1653.59	1730.77	2354.12	1852.54	1627.1	1185.32	1460.56	1467.67	1465.55	1800.99	1421.27	1469.76	1649.02	1924.94	994.563	1447.29	1163.86	1219.79		102.259	85.1774	93.7452	93.8177	86.4994	102.19	95.3525	100.262	93.974	104.516	96.1299
52	2607.46	1537.51	1446.24	1202.04	1626.13	1951.37	1698.1	1226.95	1616.68	1434.63	2128.21	1189.09	1461.57	1305.15	1699.79	2603.44	1816.21	1319.16	1404.07	1660.76	1733.26	2341.3	1861.42	1625.03	1183.65	1466.39	1473.74	1455.18	1815.29	1423.14	1474.88	1649.78	1938.74	1006.05	1448.94	1167.66	1211.78		102.769	85.3434	94.8607	93.5297	86.915	102.46	95.6515	100.741	94.3156	104.377	96.1159
53	2611.73	1544.81	1442.88	1209.34	1625.99	1942.83	1725.48	1233.22	1614.28	1441.67	2126.91	1211.13	1460.04	1305.46	1703.03	2615.75	1808.51	1323.6	1404.7	1658.44	1732.97	2345.36	1862.8	1625.51	1186.38	1462.09	1472.6	1462.75	1828.2	1415.78	1483.67	1648.83	1938.02	993.807	1451.6	1170	1209.65		102.597	85.31	94.6406	93.034	86.9071	102.6	97.1936	100.787	94.1756	105.127	96.0572
54	2609.03	1549.67	1439.36	1206.7	1635.62	1935.76	1723.17	1231.45	1625.77	1439.77	2119.15	1195.44	1466.69	1304.47	1708.78	2617.34	1810.7	1320.46	1401.87	1671.01	1731.69	2338.95	1860.13	1626.24	1175.38	1462.42	1469.67	1462.05	1864.47	1421.78	1482.09	1646.42	1936.12	997.416	1456.65	1175.92	1219.4			85.3138	94.4095	93.5113	87.4219	102.341	97.0638		94.846	105.132	95.7066
55	2630.31	1552.69	1461.53	1203	1641.46	1940.87	1730.72	1236.55	1647.24	1450.1	2120.43	1203.45	1459.71	1313.7	1707.44	2615.78	1804.91	1316.16	1403.48	1667.16	1733	2334.84	1862.8	1616.35	1181.47	1474.68	1461.62	1470.29	1852.52	1412.4	1483.74	1650.82	1950.08	994.129	1448.6	1177.29	1212.72			85.4054	95.8636	93.4318	87.734	102.205	97.4891		96.0985	105.091	95.7644
56	2627.01	1552.09	1453.36	1196.62	1650.16	1943.52	1741.84	1251.6	1661.19	1450.18	2125.77	1200.75	1454.04	1305.84	1721.48	2612.3	1798.06	1314.47	1402.22	1681.88	1733.89	2338.2	1855.65	1617.11	1178.65	1464.57	1465.64	1468.87	1842.43	1416.77	1486.28	1656.53	1953.33	1006.89	1465.06	1177.29	1220.13			85.0501	95.3278	93.5499	88.1992	102.23	98.1154		96.9123	105.286	96.0059
57	2627.49	1552.15	1452.55	1202.76	1654.17	1938.61	1745.28	1251.98	1655.89	1449.61	2118.94	1207.23	1466.54	1319.17	1725.39	2620.25	1794.53	1310.3	1398.59	1683.33	1740.73	2335.53	1859.61	1617.89	1174.44	1461.84	1469.18	1461.31	1849.1	1423.54	1486.04	1656.64	1949.46	1001.38	1466.33	1174.94	1217.26			85.2633	95.2744	93.3716	88.4133	101.819	98.309		96.603	107.136	95.6974
58	2639.19	1553.82	1443.75	1201.74	1654.72	1936.03	1746.34	1247	1673.4	1452.3	2115.08	1208.38	1468.12	1322.81	1732.16	2627.44	1792.48	1307.47	1393.73	1683.08	1739.57	2328.2	1862.42	1618.19	1177.91	1462.63	1467.67	1454.47	1864.03	1420.23	1489.23	1653.91	1958.45	994.46	1467.88	1190.33	1227.49				94.6974		88.4431		98.3689		97.6249	105.932	95.5229
59	2652.34	1547.36	1452.32	1203.26	1662.07	1936.51	1752.36	1252.95	1677.49	1477.83	2118.03	1199.67	1469.45	1317.11	1730.75	2625.01	1797.77	1306.36	1393.88	1694.09	1735.16	2327.48	1864.33	1611.81	1173.54	1465.52	1472.38	1450.05	1856.69	1427	1498.36	1657.31	1954.75	1006.84	1465.61	1189.8	1220.33				95.2594		88.8358		98.7079		97.8635		95.6561
60	2647.9	1551.24	1453.79	1200.97	1678.61	1928.73	1755.6	1253.52	1683.88	1461.22	2124.53	1183.96	1460.5	1326.42	1737.63	2635.59	1797.29	1305.64	1394.3	1700.1	1743.41	2331.01	1856.75	1616.26	1176.81	1465.45	1469.54	1451.05	1869.5	1418.73	1482.95	1658.84	1969.83	1011.44	1471.99	1196.67	1222.04				95.3563		89.7196		98.8903		98.2359		95.9499
[truncated: 31 more columns]

## Sheet: CK-666+Y-27 20190328
	1	1	1	2	2	2	3	3	3	3	4	4	4	5	5	5	6	6	7	7	7	7	8	8	8	9	9	9	9	9	10	11	11	11	12		1	1	1	2	2	2	3	3	3	3	4	4	4
	1	4	5	1	2	4	1	2	4	5	1	2	3	1	2	7	1	4	1	2	3	4	1	2	3	5	6	7	8	11	5	1	8	13	5		1	4	5	1	2	4	1	2	4	5	1	2	3
0	1836.95	1759.03	2431.54	1871.95	1996.46	2417.23	1356.08	1845.4	1939.25	3680.51	2941.19	2804.89	1865.18	2350.37	1940.45	1436.27	1952.39	2459.08	2941.39	1824.48	1644.89	2757.02	1449.19	1361.86	1815.6	1852.53	2197.32	1583.5	1633.01	1840.12	1069.13	1510.6	1716.96	1236.97	1322.72		100	100	100	100	100		100	100		100			100
1	1830.25	1738.9	2413.36	1885.24	1985.28	2389.77	1343	1818.93	1937.21	3673.64	2944.04	2789.26	1865.43	2367.27	1947.19	1422.75	1949.46	2465.45	2962.21	1809.47	1630.73	2748.25	1448.37	1353.22	1813.57	1843.03	2198.63	1562.83	1929	1833.07	1064.84	1508.9	1701.21	1248.14	1322.1		99.6927	98.8553	99.2521	100.71	99.4401		100.495	98.5655		99.8133			100.014
2	1831.63	1711.19	2400.06	1900.66	1983.14	2392.19	1349.64	1820.84	1940.91	3679.88	2958.38	2773.94	1880.62	2406.24	1948.77	1429.27	1942.66	2489.02	2974.31	1788.94	1633.36	2736.64	1440.34	1343.58	1816.02	1844.1	2194.14	1556.63	1920.1	1827.58	1058.72	1502.74	1701.56	1247.91	1308.12		99.8007	97.2801	98.705	101.534	99.3329		99.9368	98.6689		99.983			100.828
3	1826	1701.57	2382.68	1889.15	1976.84	2371.82	1342.15	1819.74	1952.68	3686.15	2960.87	2788.61	1890.18	2438.95	1933.84	1420.85	1949.38	2518.24	2986.13	1774.95	1632.88	2751.4	1437.66	1333.48	1816.63	1838.95	2210.76	1561.98	1907.85	1813.49	1058.23	1495.95	1718.8	1246.34	1304.95		99.616	96.733	97.9906	100.919	99.0176		100.438	98.6094		100.153			101.34
4	1827.98	1704.75	2358.54	1904.06	1967.79	2363.79	1348.89	1811.79	1962.8	3690.29	2980.23	2770.69	1898.44	2470.11	1932.09	1406.01	1955.64	2519.48	2992.64	1754.28	1623.43	2743.55	1427.24	1323.89	1824.88	1847.53	2206.39	1540.29	1904.35	1814.05	1056.44	1490.95	1712.19	1250.15	1292.91		100.055	96.914	96.9978	101.715	98.5641		100.155	98.1787		100.266			101.783
5	1824.59	1696.64	2332.41	1906.54	1964.5	2355.46	1345.08	1811.22	1950.52	3690.1	2988.79	2764.27	1904.36	2507.5	1933.92	1406.09	1957.21	2543.01	3000.44	1739.89	1618.55	2753.28	1431.09	1313.19	1823.67	1859.36	2206.46	1531.6	1911.95	1800.01	1062.55	1490.13	1712.14	1252.81	1288.55		99.3824	96.4532	95.923	101.848	98.3994		99.9725	98.1475		100.261			102.101
6	1832.63	1684.32	2318.04	1917.29	1956.26	2345.74	1342.63	1800.89	1959.24	3689.6	2973.25	2748.36	1920.74	2551.06	1927.92	1392.65	1948.93	2561.6	2978.24	1725.49	1616.17	2732.76	1429.14	1308.6	1828.33	1860.54	2193.44	1526.26	1899.03	1816.94	1055	1487.93	1709.24	1255.58	1275.15		99.3052	95.7525	95.332	102.422	97.9867		100.35	97.5879		100.247			102.979
7	1820.31	1681.71	2298.27	1909.91	1949.41	2327.4	1347.7	1805.25	1960.61	3705.16	2976.16	2771.12	1921.33	2593.36	1904.78	1390.62	1957.58	2551.46	2978.98	1725.04	1620.3	2744.33	1425.34	1299.58	1823.45	1854.58	2176.1	1522.77	1898.66	1812.18	1060.8	1484.03	1703.53	1238.91	1264.54		99.3914	95.6042	94.5191	102.028	97.6437		100.764	97.8242		100.67			103.011
8	1818.9	1679.9	2282.95	1912.32	1939.98	2320.13	1353.26	1792.75	1966.18	3712.81	2962.68	2757.17	1945.66	2626.25	1908.98	1393.93	1958.7	2544.38	2971.76	1707.53	1615.15	2738.23	1425.57	1296.36	1826.36	1852.41	2169.22	1530.19	1906.37	1814.08	1055.56	1480.01	1709.03	1247.53	1253.86		98.822	95.5016	93.8891	102.156	97.1713		100.351	97.1471		100.878			104.315
9	1820.48	1665.23	2274.07	1920.4	1948.12	2320.38	1347.71	1788.78	1961.71	3700.31	2957.09	2760.68	1953.37	2673.69	1891.34	1394.65	1964.87	2542.69	2952.57	1705.04	1607.55	2742.39	1436	1284.78	1817.79	1864.29	2161.62	1512.25	1904.19	1813.07	1054.12	1482.64	1698.32	1248.56	1257.38		98.5487	94.6674	93.5236	102.588	97.5787		101.244	96.9318		100.538			104.728
10	1810.05	1656.56	2256.05	1923.18	1929.14	2311.36	1359.71	1788.21	1957.14	3692.3	2955.94	2749.91	1960.16	2712.2	1894.49	1393.64	1967.81	2539.57	2937.21	1697.95	1597.55	2740.03	1431.34	1277.75	1818.68	1863.3	2167.43	1514.88	1902.89	1809.41	1057.73	1488.84	1686.9	1243.62	1234.07		98.7174	94.1744	92.7826	102.737	96.6281		100.846	96.9011		100.32			105.093
11	1805.04	1659.94	2251.81	1911.33	1918.08	2317.79	1354.36	1790.98	1960.11	3691.1	2944.71	2731.17	1967.17	2749.9	1892.68	1396.82	1983.3	2528.86	2923.59	1704.66	1600.19	2739.42	1437.77	1269.8	1814.46	1861.84	2170.6	1512.27	1902.76	1816.28	1069.05	1480.22	1699.4	1245.92	1231.12		98.6423	94.3668	92.6083	102.103	96.0743		100.017	97.0511		100.288			105.468
12	1808.13	1647.51	2246.28	1916.68	1908.11	2320.65	1343.23	1773.1	1942.53	3679.15	2943.31	2721.08	1980.15	2792.36	1886.13	1382.73	1989.07	2514.81	2902.55	1701.27	1585.79	2727.35	1435.33	1273.18	1814.09	1866.51	2173.82	1524.07	1906.57	1816.01	1073.16	1482.5	1699.84	1237.54	1221.42		97.9367	93.6598	92.3809	102.389	95.5746		99.4229	96.0823		99.963			106.164
13	1806.76	1644.57	2232.34	1915.92	1899.35	2329.89	1335.25	1771.58	1937.51	3674.29	2947.2	2711.65	1991.95	2827.64	1873.95	1386.29	1986.67	2500.32	2900.28	1705.14	1583.15	2728.64	1440.8	1277.46	1812.16	1860.09	2171.38	1515.07	1891.79	1812.85	1062.67	1485.53	1701.72	1244.67	1216.79		97.8766	93.493	91.8077	102.349	95.1361		99.6536	95.9995		99.8311			106.797
14	1793.83	1629.57	2220.53	1903.61	1894.72	2314.53	1338.35	1765.71	1940.53	3646.23	2939.49	2693.09	2001.31	2855.89	1863.73	1377.31	1992.12	2511.28	2880.65	1707.9	1571.8	2739.73	1429.83	1283.88	1804.38	1862.75	2166.56	1515.58	1895.63	1817.17	1076.75	1496.01	1694.07	1231.47	1210.11		98.0494	92.64	91.3217	101.691	94.9043		99.6636	95.6813		99.0685			107.299
15	1792.73	1626.04	2215.36	1900.78	1894.33	2325.15	1338.48	1773.35	1930.84	3612.26	2950.34	2679.64	1994.79	2864.24	1859.91	1374.28	1992.96	2480.6	2891.08	1692.08	1566.58	2746.79	1434.23	1282.66	1809.22	1853.06	2163.74	1515.34	1892.61	1828.14	1077.84	1492.94	1688.86	1231.13	1207.19		97.3459	92.4393	91.1094	101.54	94.8844		99.8202	96.0954		98.1457			106.949
16	1795.9	1615.83	2203.38	1891.54	1889.22	2316.88	1340.59	1757.41	1937.39	3584.33	2943.45	2678.2	1999.77	2885.26	1849.46	1386.78	1998.6	2448.49	2863.42	1696.42	1568.15	2737.58	1424.97	1283.59	1810.32	1868.18	2162.69	1518.18	1887.23	1809.62	1072.51	1500.7	1692.9	1231.84	1205.67		97.8088	91.8588	90.6168	101.046	94.6287		99.3936	95.2318		97.3867			107.216
17	1783.01	1625.69	2200.03	1897.56	1892.43	2324.94	1334.86	1763.03	1924.75	3562.69	2952.94	2675.35	1998.61	2892.49	1845.54	1386.74	1998.5	2440.04	2852.71	1691.87	1567.84	2731.22	1429.23	1283.18	1805.08	1858.43	2150.16	1508.95	1889.92	1817.41	1075.71	1497.22	1681.61	1224.43	1195.64		97.0959	92.4197	90.4788	101.368	94.7895		99.2497	95.5364		96.7987			107.154
18	1791.49	1618.83	2189.86	1877.66	1890.02	2321.53	1332.92	1753.74	1923.65	3553.81	2953.87	2672.01	2013.78	2897.26	1843.79	1384.65	2002.22	2445.29	2878.64	1689.47	1552.43	2749.17	1432.73	1281.93	1807.06	1850.27	2153.31	1515.24	1900.81	1825.85	1079.79	1488.8	1676.42	1230.58	1193.11		96.7134	92.0296	90.0603	100.305	94.6687		99.5065	95.0328		96.5576			107.967
19	1778.43	1623.2	2184.49	1879.4	1884.08	2328.37	1336.37	1751.47	1925.21	3535.61	2959.86	2669.01	2022.42	2900.88	1842.38	1386.84	1996.89	2443.12	2860.35	1681.86	1562.51	2751.58	1426.31	1283.47	1799.04	1857.03	2173.31	1537.42	1896.51	1824.36	1092.09	1496.74	1669.95	1232.54	1180.56		97.3825	92.2781	89.8398	100.398	94.3714		100.449	94.9097		96.063			108.431
20	1771.43	1618.03	2185.31	1868.88	1868.23	2332.14	1349.04	1752.03	1918.71	3539.49	2959.51	2667.39	2027.75	2887.74	1835.91	1397.91	1999.2	2446.33	2857.17	1691.26	1557.76	2740.38	1424.43	1277.7	1793.19	1850.62	2165.21	1546.2	1892.44	1834.36	1087.12	1504.73	1673.58	1230.11	1193.48		97.1318	91.9841	89.8734	99.8358	93.5775		99.5737	94.9401		96.1684			108.716
21	1783.68	1613.09	2181.07	1867.34	1867.92	2337.98	1337.27	1735.03	1911.02	3546.16	2968.21	2670.93	2040.35	2879.76	1830.58	1391.11	2007.62	2443.61	2848.18	1690.76	1554.94	2749.03	1417.23	1281.64	1784.17	1864.83	2170.19	1555.55	1893.88	1840.98	1101.53	1497.19	1671.38	1231.62	1180.32		97.1184	91.7034	89.6991	99.7534	93.5616		100.341	94.0191		96.3496			109.391
22	1779.09	1633.38	2189.03	1850.47	1861.9	2343.14	1347.58	1738.58	1910.61	3550.86	2961.73	2658.58	2037.87	2878.55	1824.22	1404.07	2022.05	2449.49	2857.71	1690.86	1548.6	2733.47	1411.15	1283.73	1782.2	1851.67	2162.79	1577.74	1896.9	1833.44	1100.47	1500.67	1672.26	1220.81	1180.65		97.3271	92.857	90.0265	98.8522	93.2605		100.56	94.2116		96.4774			109.259
23	1778.85	1632.62	2188.97	1850.11	1867.78	2348.29	1350.51	1727.45	1908.5	3555.98	2952.57	2655.59	2049.78	2869.6	1831.03	1418.17	2026.32	2452.18	2854.04	1695.47	1547.3	2736.49	1414.11	1287.43	1792.99	1856.86	2182.55	1580.27	1900.37	1843.16	1098.26	1505.73	1674.62	1231.48	1170.87		97.2147	92.8137	90.024	98.8334	93.5548		100.718	93.6083		96.6164			109.897
24	1782.67	1646.2	2192.99	1845.24	1863.1	2358.76	1352.64	1737.2	1910.86	3568.23	2950.78	2650.48	2057.38	2866.4	1828.05	1431.81	2031.9	2457.32	2861.87	1695.16	1541.63	2733.84	1421.19	1299.28	1788.25	1847.76	2173.21	1588.01	1899.45	1834.59	1106.55	1497.06	1675.15	1226.21	1169.55		97.2618	93.5854	90.1892	98.5729	93.3204		101.849	94.1368		96.9495			110.305
25	1780.61	1646.75	2197.46	1851.42	1865.79	2376.61	1367.83	1742.47	1900.03	3575.71	2955.7	2641.64	2055.91	2857.37	1818.59	1437.54	2022.09	2469.14	2861.98	1690.14	1533.12	2733.68	1417.54	1289.53	1788.94	1854.47	2162.21	1605.65	1886.42	1843.72	1104.87	1497	1675.45	1220.54	1167.57		97.8626	93.6166	90.373	98.9032	93.4552		101.522	94.4223		97.1527			110.226
26	1781.47	1640.43	2202.5	1840.77	1866.69	2386.55	1363.44	1751.71	1900.29	3575.09	2957.41	2637.21	2057.85	2869.87	1819.85	1438.75	2021.91	2472.28	2872.83	1688.09	1526.03	2729.53	1416.12	1292.83	1788.12	1849.57	2175.18	1613.45	1890.36	1833.32	1108.54	1502.94	1671.45	1224.66	1169.14		97.8126	93.2573	90.5802	98.3344	93.5002		101.44	94.9231		97.1357			110.33
27	1792.48	1652.8	2186.74	1835.95	1865.85	2377.42	1362.33	1764.89	1909.48	3585.62	2950.88	2624.89	2063.38	2868.47	1819.95	1449.17	2023.35	2449.22	2871.82	1692.36	1531.63	2726.18	1412.49	1295.17	1791.23	1843.46	2153.27	1627.92	1891.52	1841.02	1108.91	1502.29	1678.23	1223.87	1169.87		98.0698	93.9607	89.9322	98.0768	93.4583		102.508	95.6372		97.4218			110.626
28	1791.56	1638.15	2204.91	1847.28	1862.45	2404.21	1376.68	1779.79	1919.51	3591.86	2960.26	2642.44	2065.95	2891.47	1818.19	1454.35	2036.33	2438.86	2868.21	1692.92	1533.6	2722.02	1415.7	1297.41	1789.8	1851.09	2163.73	1636.1	1889.05	1837.95	1111.02	1505.66	1671.97	1221.41	1176.59		97.3391	93.1276	90.6795	98.6822	93.2876		101.532	96.4444		97.5915			110.764
29	1796.27	1644.87	2202.39	1837.09	1858.94	2399.97	1363.57	1798.84	1926.82	3584.12	2943.25	2634.11	2075	2896.91	1826.05	1458.54	2020.15	2410.91	2877.68	1696.47	1536.11	2743.74	1410.63	1303.09	1788.57	1844.39	2169.99	1649.23	1897.47	1828.91	1123.25	1499.92	1671.09	1227.04	1173.41		97.609	93.5099	90.5758	98.1377	93.1119		102.367	97.4768		97.3811			111.249
30	1782.89	1641.46	2204.16	1835.99	1857.72	2406.59	1374.79	1805.39	1936.62		2954.09	2644.01	2072.89	2899.93	1830.68	1465.69	2016.65	2416.43	2886.55	1701.01	1526.34	2736.86	1413.36	1305.14	1786.52	1851.06	2185.48	1647.06	1886.84	1829.67	1119.18	1498.34	1658.72	1233.67	1167.18		98.02	93.316	90.6486	98.0788	93.051		102.28	97.8318					111.137
31	1787.83	1645.6	2215.92	1827.44	1868.08	2410.44	1373.63	1827.09	1930.34		2958.55	2646.58	2074.05	2910.15	1827.45	1447.15	2030.24	2428.68	2892.56	1702.11	1536.97	2724.2	1425.63	1302.78	1791.37	1857.94	2177.16	1656.54	1883.75	1841.11	1118.69	1495.56	1669.19	1218.31	1170.13		97.7487	93.5515	91.1324	97.6224	93.5698		103.295	99.0078					111.198
32	1795.36	1655.3	2230.04	1833.69	1858.22	2418.5	1387.25	1832.95	1931.11		2947.22	2647.92	2084.52	2915.83	1832.2	1455.64	2016.32	2436.09	2912.23	1708.25	1534.09	2733.5	1431.87	1306.89	1792.65	1849.07	2182.57	1598.37	1889.1	1836.29	1119.82	1498.6	1665.25	1232.22	1167.1		97.5598	94.1026	91.713	97.956	93.0758		103.044	99.325					111.76
33	1790.39	1666.81	2240.42	1825.18	1860.92	2425.57	1383.88	1839.76	1944.88		2958.15	2656.87	2079.67	2915.89	1836.24	1461.84	2015.16	2437.88	2903.47	1710.36	1531.51	2751.86	1427.54	1307.86	1797.96	1843.01	2170.36	1599.76	1892.62	1849.4	1125.04	1486.56	1670.56	1238.15	1173.86		98.3788	94.7573	92.14	97.5012	93.2114		103.881	99.6943					111.5
34	1786.93	1663.15	2262.26	1814.98	1865.93	2438.11	1395.12	1863.15	1937.85		2954.18	2658.63	2079.18	2895.47	1835.86	1473.08	2019.19	2457.9	2917.96	1706.26	1531.41	2735.76	1427.75	1311.66	1792.61	1853.74	2171.07	1597.73	1892.54	1860.55	1127.57	1476.39	1671.73	1241.4	1164.95		98.1408	94.5492	93.0382	96.9563	93.4623		103.894	100.961					111.474
35	1801.93	1664.81	2276.76	1819.44	1879	2438.66	1395.3	1865.16	1937.01		2953.81	2650.83	2077.84	2899.25	1834.03	1472.79	2014.08	2455.32	2917.83	1712.87	1518.19	2731.86	1428.06	1305.83	1790.8	1851.76	2177.08	1606.9	1892.21	1867.75	1130.73	1477.32	1675.05	1243.6	1171.58		98.4116	94.6436	93.6345	97.1949	94.1167		103.894	101.071					111.402
36	1797.57	1668.37	2302.85	1812.7	1868.02	2449.79	1395.29	1873.81	1959.56		2971.14	2646.46	2080.81	2898.08	1843.47	1465.94	2013.84	2472.83	2915.55	1706.29	1528.76	2739.08	1431.42	1320.71	1789.4	1854.39	2180.21	1610.57	1893.15	1859.69	1125.06	1473.73	1673.22	1240.83	1177.12		98.2058	94.8457	94.7075	96.8346	93.5669		104.432	101.539					111.561
37	1802.53	1664.76	2319.51	1803.36	1869.87	2458.64	1402.52	1876.58	1953.04		2965.84	2648.39	2076.2	2897.97	1841.25	1477.75	2003.71	2479.08	2922.84	1709.56	1521.91	2724.4	1426.96	1311.25	1786.86	1864.22	2164.35	1624.29	1889.92	1864.83	1133.66	1468.31	1672.39	1248.66	1173.01		98.2392	94.6404	95.3924	96.3359	93.6594		104.865	101.689					111.314
38	1798.76	1669.06	2329.95	1818.57	1871.24	2468.34	1408.34	1850.17	1953.81		2970.6	2642.98	2090.47	2899.47	1844.35	1473.94	2001	2487.62	2936.66	1711.12	1521.03	2724.91	1436.37	1314.5	1788.28	1860.52	2168.98	1611.75	1883.32	1876.11	1133.45	1471.46	1680.62	1261.14	1171.87		98.3877	94.8853	95.8217	97.148	93.7282		105.801	100.258					112.079
39	1799.37	1677.43	2335.56	1801.93	1860.82	2464.71	1420.91	1831.3	1954.76		2967.4	2629.73	2092.24	2904.8	1846.88	1486.58	2003.92	2477.41	2940.67	1715.11	1527.21	2725.78	1435.07	1311.86	1781.94	1879.78	2164.76	1631.7	1892.71	1877.77	1126.43	1466.21	1658.26	1262.6	1173.05		99.116	95.3611	96.0526	96.2594	93.2059		105.475	99.236					112.174
40	1802.1	1674.85	2343.78	1796.98	1862.06	2461.89	1416.53	1826.86	1968.03		2983.55	2652.23	2106.38	2898.11	1846.25	1487.26	2013.32	2477.77	2947.85	1717.59	1521.7	2723.33	1432.62	1312.26	1780.89	1880.11	2168.11	1633.96	1881.34	1881.05	1130.91	1457.15	1668.75	1260.48	1178.94		99.1328	95.2145	96.3908	95.9949	93.2685		106.144	98.9952					112.932
41	1815.43	1685.07	2343.72	1797.74	1863.47	2484.88	1425.51	1831.79	1961.5		2990.59	2625.83	2095.49	2900.5	1855.82	1494.98	2006.77	2485.07	2960.83	1716.16	1526.98	2723.91	1424.84	1321.2	1779.25	1898.31	2173.82	1634.89	1886.38	1881.3	1132.72	1452.17	1667.74	1278.72	1174.82		98.8072	95.7955	96.3884	96.0354	93.3388		106.369	99.2621					112.348
42	1815.74	1689.23	2349.54	1787.9	1856.38	2482.72	1428.54	1839.63	1968.1		2984.62	2643.58	2106.67	2908.53	1851.67	1497.57	1992.4	2493.84	2959.31	1714.51	1540.63	2732.04	1430.67	1324.01	1790.49	1890.76	2162.79	1637.47	1900.25	1883.56	1136.3	1446.02	1679.33	1285.1	1182.62		99.6274	96.0316	96.6275	95.5096	92.9836		106.806	99.6874					112.947
43	1809.78	1683.07	2323.47	1798.78	1861.05	2484.3	1434.41	1805.04	1974.81		2988.54	2632.22	2115.33	2906.06	1858.85	1492.4	1993.29	2498.55	2967.07	1719.49	1526.36	2733.6	1435.21	1311.02	1792.46	1901.36	2170.32	1632.34	1898.03	1887.44	1142.63	1444.82	1683.34	1290.71	1186.23		100.985	95.6818	95.5554	96.0913	93.2175		106.148	97.813					113.412
44	1824.8	1689.42	2312.37	1796.38	1862.03	2480.47	1425.57	1790.23	1968.99		2978.69	2638.69	2126.69	2895.99	1878.34	1492.93	2000.07	2516.23	2981.82	1717.07	1518.89	2733.23	1439.21	1329.26	1790.88	1900.88	2182.77	1590.17	1906.86	1887.06	1133.24	1436.53	1675.36	1300.09	1200.55		102.009	96.0428	95.0987	95.9628	93.2666		106.681	97.0105					114.021
45	1849.67	1687.28	2303.97	1799.21	1861.96	2481.39	1432.73	1792.62	1967.55		2981.99	2638.18	2128.64	2890.93	1869.24	1485.06	1997.79	2509.97	2973.94	1721.91	1528.91	2734.03	1437.13	1320.85	1795.78	1902.69	2164.19	1592.34	1894.17	1880.9	1144.18	1435.36	1690.91	1302.87	1198.81		103.41	95.9209	94.7536	96.1141	93.2633		106.708	97.1399					114.125
46	1868.42	1703.24	2278.4	1792.74	1865.95	2492.62	1433.08	1786.49	1985.82		2974.07	2639.03	2127.47	2876.62	1873.09	1493.26	1992.5	2494.29	2979.92	1732.98	1526.87	2748.84	1436.98	1326.47	1791.86	1910.53	2157.51	1599.75	1903.62	1883.63	1149.96	1428.74	1681.42	1315.11	1203.72		104.109	96.8284	93.7018	95.7685	93.4633		107.427	96.8075					114.063
47	1894.09	1699.7	2286.3	1798.66	1867.35	2506.16	1442.74	1776.85	1974.11		2981.71	2637.07	2138.44	2882.48	1884.73	1496.6	1999.72	2497.86	2993.25	1734.96	1522.99	2740.3	1442.31	1333.53	1797.69	1918.95	2153.56	1604.09	1907.08	1891.49	1151.65	1422.27	1691	1322.7	1215.15		104.934	96.6268	94.0266	96.0848	93.5331		106.402	96.2851					114.651
48	1906.89	1711.68	2262.56	1800.89	1867.34	2490.03	1428.98	1786.69	1974.18		2984.2	2645.34	2145.9	2880.96	1887.89	1486.78	1990.63	2495.79	2996.99	1743.33	1533.71	2739.18	1456.02	1332.06	1797.29	1922.05	2146.77	1627.89	1917.83	1887.82	1148.45	1434.55	1696.32	1326.76	1227.1		105.369	97.3081	93.0502	96.2036	93.5327		106.572	96.8184					115.051
49	1922	1710.53	2262.51	1797.48	1865.88	2503.74	1431.27	1786.73	1993.15		2987	2640.39	2142.83	2856.82	1897.15	1478.05	1994.17	2500.14	3007.92	1732.1	1531.35	2748.36	1447.6	1336.48	1808.13	1929.71	2144.54	1630.68	1927.78	1896.99	1146.77	1430.96	1691.11	1329.17	1228.52		106.521	97.2425	93.0482	96.0219	93.4596		106.628	96.8208					114.886
50	1929.97	1709.75	2267.03	1797.83	1869.89	2509.33	1432.02	1780.87	1982.88		2994.56	2651.83	2143.56	2845.45	1901.44	1486.76	1997.29	2502.36	2998.51	1751.99	1526.56	2756.19	1449.4	1345.37	1807.29	1933.55	2148.18	1635.32	1922.72	1885.14	1152.03	1430.23	1698.95	1343.32	1240.17		107.346	97.1984	93.2344	96.0404	93.6607		106.857	96.5029					114.925
51	1951.06	1717.22	2257.41	1806.38	1869.93	2508.83	1435.09	1790.5	1983.21		3001.4	2640.52	2148.7	2840.07	1901.14	1497.51	2002.13	2504	3011.02	1756.22	1525.87	2748.47	1443.01	1340.71	1807.49	1928.52	2142.07	1599.52	1927.46	1887.68	1146.1	1419.83	1698.78	1349.84	1247.32		107.526	97.6229	92.8386	96.4971	93.6626		107.566	97.0249					115.201
52	1966.18	1717.61	2257.36	1802.58	1872.52	2501.88	1444.61	1774.9	1991.89		2999.85	2649.17	2150.03	2819.95	1900.06	1498.88	2005.64	2512.67	3017.55	1755.37	1536.81	2745.64	1455.44	1344.23	1804.8	1941.98	2137.14	1616.35	1933.64	1884.07	1149.46	1421.54	1703.87	1352.59	1260.47		106.865	97.6453	92.8364	96.2943	93.792		107.159	96.1797					115.272
53	1969.48	1729.77	2258.78	1794.67	1875.93	2512.44	1439.15	1779.34	1978.15		3003.15	2652.52	2152.1	2775.58	1906.48	1485.46	2003.14	2522.48	3023.33	1774.55	1538.05	2744.68	1452.55	1335.18	1811.61	1956.03	2123.64	1630.35	1926.67	1883.91	1159.11	1418.94	1704.3	1358.29	1266.17		108.927	98.3362	92.8948	95.8715	93.9632		107.062	96.4203					115.383
54	1957.36	1652.84	2245.82	1802.69	1875.09	2512.6	1437.84	1793.61	1989.96		3009.03	2656.66	2170.56	2739.6	1902.23	1498.23	2000.74	2522.77	3023.72	1767.09	1532.06	2746.18	1446.23	1339.34	1810.45	1944.74	2116.64	1635.33	1943.12	1887.74	1152.91	1415.2	1697.28	1357.15	1269.5		109.6	93.9629	92.3619	96.3	93.9211		107.248	97.1935					116.373
55	1995.14	1747.09	2275.35	1799.54	1877.23	2522.86	1440.33	1801.58	1990.82		3010.57	2664.25	2155.25	2700.09	1911.04	1497.62	2005.93	2522.12	3029.6	1773.88	1537.49	2744.47	1452.87	1339.77	1807.49	1962.75	2122.58	1647.34	1941.54	1889.64	1161.17	1416.88	1711.88	1363.19	1278.32		110.445	99.3212	93.5763	96.1316	94.0282		107.151	97.6253					115.552
56	2007.46	1751.83	2276.68	1796.03	1878.76	2528.82	1439.04	1801.91	1994.82		3025.32	2679.35	2155.01	2652.3	1907.17	1504.64	2016.51	2539.91	3032.6	1779.33	1550.24	2750.8	1453.56	1341.25	1822.23	1957.9	2123.42	1648.65	1945.3	1900.68	1158.3	1407.44	1712.09	1371.83	1287		110.789	99.5904	93.6311	95.9442	94.1048		107.345	97.6431					115.539
57	2022.94	1750.95	2279.84	1798.78	1880.34	2520.22	1441.65	1808.77	1992.24		3028.86	2683.26	2154.78	2620.02	1912.13	1503.19	2000.66	2539.2	3037.81	1782.85	1546.45	2752.06	1452.73	1334.95	1831.39	1955	2120.76	1649.68	1945.77	1903.66	1156.42	1410.31	1717.94	1370.48	1301.1		107.875	99.5406	93.7612	96.0913	94.1839		107.165	98.015					115.527
58	2029.23	1766.53	2280.79	1796.88	1880.8	2521.82	1439.23	1799.68	2004.98		3031.56	2683.91	2158.69	2611.89	1918.79	1522.36	2005.1	2550.27	3032.98	1777.2	1556.75	2759.57	1463.62	1346.2	1838.05	1952.14	2119.51	1644.36	1948.96	1912.08	1159.02	1416.26	1701.76	1380.59	1311.12		104.882	100.426	93.8001	95.9895	94.2068		108.02	97.5224					115.737
59	1975.87	1760.1	2278.91	1795.49	1880.86	2532.26	1450.7	1811.69	2000.45		3046.16	2683.8	2162.68	2607.28	1923.77	1514.47	1997.4	2549.4	3036.25	1791.03	1556.87	2767.54	1475.67	1344.51	1833.81	1952.85	2121.2	1645.38	1957.96	1920.22	1158.69	1409.29	1700.93	1378.23	1318.88			100.061	93.7227	95.9154	94.2099		107.936	98.1733					115.95
60	1921.04	1766.2	2288.3	1790.61	1888.33	2525.31	1449.58	1820.28	2001.71		3048.28	2689.86	2159.23	2597.97	1922.08	1503.75	2000.31	2555.57	3056.05	1795	1559.13	2759.32	1472.9	1343.97	1842.19	1944.26	2127.93		1958.47	1924.02	1152.92	1406.66	1712.64	1374.96	1321.87			100.408	94.1088	95.6548	94.5842			98.6387					115.766
																													1960.64
[truncated: 25 more columns]
