# Supplementary material for: A mechano-osmotic feedback couples cell volume to the rate of cell deformation
Source: eLife journal article supplement (doi:10.7554/elife.72381), 2022-04-13
Supplement: supp [file V_S_confinement.xlsx]

## Sheet: surface 
h	20	20	20	20	20	20	20	20	20	20	20	20	20	20	20	20	20	15.2	14.9	14.9	14.9	14.5	13.8	13.6	12.3	12.3	10.5	10.5	10.5	10.2	9.4	9.4	9.4	9.4	9.4	8.8	7.8	7.4	6.6	6.6	6.4	6.3	5.3	5.3	5.3	5.1	4.9	4.8	4.7
V	2106.38	2012.24	2259.82	2205.62	2134.14	2171.39	2291	2242.18	2192.48	2052.02	2165.73	2197.57	2213.16	2127.34	2127.32	2122.16	2189.5	1833.33	1930.45	2083.86	2011.28	1697.35	2101.17	1778.32	1686.48	1797.84	1607.54	1851.53	1949.58	1714.34	1995.3	1571.03	1796.07	1872.44	1729.96	2080.08	1884	1495.02	1452.71	1591.92	1913.76	1365.13	1483.35	1781.88	1718.01	1212.33	1535.04	1420.57	1881.84
r theor	7.95212	7.83184	8.1407	8.07509	7.98689	8.0331	8.17797	8.11946	8.05902	7.88312	8.02611	8.06526	8.08428	7.9784	7.97838	7.97192	8.05537	6.19617	6.42186	6.67216	6.55493	6.10417	6.96172	6.4515	6.60637	6.821	6.98089	7.49196	7.68778	7.31431	8.21987	7.29379	7.79871	7.96278	7.65385	8.67409	8.76836	8.01924	8.37032	8.76222	9.75615	8.30505	9.43863	10.3449	10.1578	8.69861	9.9859	9.70589	11.2893
S theor	794.649	770.792	832.785	819.416	801.614	810.917	840.428	828.445	816.158	780.918	809.505	817.422	821.282	799.911	799.906	798.612	815.419	832.99	860.332	904.358	883.639	790.245	908.154	812.808	784.786	819.48	766.751	846.942	878.539	804.907	910.013	765.046	842.749	868.688	820.128	952.354	912.805	776.919	787.323	845.762	990.368	762.124	874.07	1016.9	986.568	754.163	933.99	884.626	1134.17
h	20	20	20	20	20	20	20	20	20	20	20	20	20	20	20	20	20	15.2	14.9	14.9	14.9	14.5	13.8	13.6	12.3	12.3	10.5	10.5	10.5	10.2	9.4	9.4	9.4	9.4	9.4	8.8	7.8	7.4	6.6	6.6	6.4	6.3	5.3	5.3	5.3	5.1	4.9	4.8	4.7
V	2106.38	2012.24	2259.82	2205.62	2134.14	2171.39	2291	2242.18	2192.48	2052.02	2165.73	2197.57	2213.16	2127.34	2127.32	2122.16	2189.5	1833.33	1930.45	2083.86	2011.28	1697.35	2101.17	1778.32	1686.48	1797.84	1607.54	1851.53	1949.58	1714.34	1995.3	1571.03	1796.07	1872.44	1729.96	2080.08	1884	1495.02	1452.71	1591.92	1913.76	1365.13	1483.35	1781.88	1718.01	1212.33	1535.04	1420.57	1881.84
r theor	7.95212	7.83184	8.1407	8.07509	7.98689	8.0331	8.17797	8.11946	8.05902	7.88312	8.02611	8.06526	8.08428	7.9784	7.97838	7.97192	8.05537	6.19617	6.42186	6.67216	6.55493	6.10417	6.96172	6.4515	6.60637	6.821	6.98089	7.49196	7.68778	7.31431	8.21987	7.29379	7.79871	7.96278	7.65385	8.67409	8.76836	8.01924	8.37032	8.76222	9.75615	8.30505	9.43863	10.3449	10.1578	8.69861	9.9859	9.70589	11.2893
S theor	794.649	770.792	832.785	819.416	801.614	810.917	840.428	828.445	816.158	780.918	809.505	817.422	821.282	799.911	799.906	798.612	815.419	832.99	860.332	904.358	883.639	790.245	908.154	812.808	784.786	819.48	766.751	846.942	878.539	804.907	910.013	765.046	842.749	868.688	820.128	952.354	912.805	776.919	787.323	845.762	990.368	762.124	874.07	1016.9	986.568	754.163	933.99	884.626	1134.17
h	V	r theor	S theor
20	2106.38	7.95212	794.649		809.305	17.3862	20	0			809.305	17.3862	20	0
20	2012.24	7.83184	770.792								837.995	44.6495	12.9308	1.8898
20	2259.82	8.1407	832.785							107.083	866.624	84.8142	7.36875	1.66047
20	2205.62	8.07509	819.416								1309.13	248.685	3.36429	1.08602
20	2134.14	7.98689	801.614
20	2171.39	8.0331	810.917
20	2291	8.17797	840.428
20	2242.18	8.11946	828.445
20	2192.48	8.05902	816.158
20	2052.02	7.88312	780.918
20	2165.73	8.02611	809.505
20	2197.57	8.06526	817.422
20	2213.16	8.08428	821.282
20	2127.34	7.9784	799.911
20	2127.32	7.97838	799.906
20	2122.16	7.97192	798.612
20	2189.5	8.05537	815.419
15.2	1833.33	6.19617	832.99		837.995	44.6495	12.9308	1.8898
14.9	1930.45	6.42186	860.332
14.9	2083.86	6.67216	904.358
14.9	2011.28	6.55493	883.639
14.5	1697.35	6.10417	790.245
13.8	2101.17	6.96172	908.154
13.6	1778.32	6.4515	812.808
12.3	1686.48	6.60637	784.786
12.3	1797.84	6.821	819.48
10.5	1607.54	6.98089	766.751
10.5	1851.53	7.49196	846.942
10.5	1949.58	7.68778	878.539
10.2	1714.34	7.31431	804.907
9.4	1995.3	8.21987	910.013		866.624	84.8142	7.36875	1.66047
9.4	1571.03	7.29379	765.046
9.4	1796.07	7.79871	842.749
9.4	1872.44	7.96278	868.688
9.4	1729.96	7.65385	820.128
8.8	2080.08	8.67409	952.354
7.8	1884	8.76836	912.805
7.4	1495.02	8.01924	776.919
6.6	1452.71	8.37032	787.323
6.6	1591.92	8.76222	845.762
6.4	1913.76	9.75615	990.368
6.3	1365.13	8.30505	762.124
5.3	1483.35	9.43863	874.07
5.3	1781.88	10.3449	1016.9
5.3	1718.01	10.1578	986.568
5.1	1212.33	8.69861	754.163
4.9	1535.04	9.9859	933.99		1309.13	248.685	3.36429	1.08602
4.8	1420.57	9.70589	884.626
4.7	1881.84	11.2893	1134.17
4.4	1630.81	10.8618	1041.56
4.2	1750.55	11.5183	1137.56
3.7	1694.43	12.0736	1196.59
3.1	1756.71	13.4306	1394.96
3.1	2049.36	14.5062	1604.72
3.1	1960.41	14.1879	1541.13
2.8	1676.98	13.8074	1440.76
2.7	1492.67	13.2656	1330.73
2.5	1714.29	14.774	1603.5
1.8	1118.27	14.0625	1401.57
1.3	1009.81	15.7244	1681.99
[truncated: 11 more columns]
