# Supplementary material for: A mechano-osmotic feedback couples cell volume to the rate of cell deformation
Source: eLife journal article supplement (doi:10.7554/elife.72381), 2022-04-13
Supplement: supp [file Vi_HeLa_cntrl_spr_osm.xlsx]

## Sheet: spreading
20180220_30		20180220_60		20180308		20180516		20200526		20200609		20211026			exp	V	stdev	n
1468.79		2068.95		1946.43		1436.18		1344.69		2171.58		2324.97			20180220_30	1874.76	476.318	50		-9.58819	9.58819
2925.37		2031.46		2165.8		2109.64		1619.28		1961.31		2130.37			20180220_60	1948.73	521.445	63		-6.02064	6.02064
1968.28		1630.6		2523.85		1478.86		1250.22		2078.35		1890.02			20180308	1921.98	648.328	85		-7.3109	7.3109
1213.45		2245.4		1671.55		2207.18		1718.97		2335.25		1330.9			20180516	2256.19	771.855	123		8.80662	8.80662
2410.09		3142.55		2008.32		1957.04		1895.96		2630.04		1924.15			20200526	2143.04	486.337	75		3.35012	3.35012
1638.48		1041.56		3521.94		1349.33		2352.52		2387.92		1648.81			20200609	2265.06	489.207	94		9.2347	9.2347
1597.72		1646.51		2242.96		1652.34		2496.34		1229.28		1957.82			20211026	2105.27	587.918	98		1.52828	1.52828
2811.4		2994.01		1465.72		1515.33		2305.07		1885.46		2324.7
2064.79		1795.73		1489.46		2448.76		2648.73		2072.82		1426.11
1789.43		2404.41		2153.14		3648.63		1957.01		1906.36		1845.5									6.54849
2161.32		1478.22		1527.44		2810.29		1940.16		1970.92		2554.87				2073.58
1680.04		1338.84		1390.41		4910.18		1859.11		3463.74		2623.27
2026.2		2631.78		2287.87		2613.42		2331.41		1523.77		3682.71
1452.19		1798.71		2034.93		2720.02		2092.5		1770.03		2541.88
1554.35		2397.04		2626.51		2438.64		1680.65		2586.56		1580.42
2507.59		1948.94		1867.27		2617.64		2586.54		1362.64		2175.46
2074.26		1667.99		1218.55		1570.65		1641.02		1967.78		1391.98
1215.81		2330.03		1594.03		2205.53		1659.02		2151.64		1426.97
1420.28		2751.88		2323.11		2165.5		2082.64		1997.67		1485.36
2667.57		1806.3		1525.04		2736.86		1787.71		3029.33		1685.6
2601.67		1663.21		1602.04		2114.4		3460.53		3342.08		1412.96
1660.94		1482.48		2074.81		1909.52		2813.08		2052.56		2254.21
2234.58		1563.25		1647.86		2102.32		2588.8		1884.55		1037.82
1531.78		3239.04		2518.59		1969.96		2770.36		1935.43		2274.77
2183.46		3576.08		1982.7		2670.86		2882.39		2267.9		1461.79
1430.39		1649.8		1516.06		2310.04		2081.5		3074.03		2091.61
1535.57		2463.14		1147.19		1579.02		2017.4		1532.11		3094.75
1771.58		1493.38		2071.09		3390.13		2268.2		1682.57		2095.62
1983.87		1864.03		1159.62		2838.98		2331.95		1892.17		2887.68
1404.36		1315.4		1490.27		2561.3		2102.31		3427.29		2301.3
1947.76		1462.04		3195.67		2075.48		1366.96		3134.24		1847.03
2109.67		1617.16		2197.61		2437.19		2213.74		3259.68		1729.14
1825.97		1324.15		1664.82		1537.34		2207.91		2042.12		2166.5
1325.94		2593.04		1481.93		2707.44		1289.38		2334.2		1975.9
1977.95		2575.96		2172.12		3491.78		1880.29		2219.98		2457.47
1868.34		1483.25		1050.86		1641.64		2373.51		1796.57		2621.09
2039.14		2086.97		2455.18		2521.61		2057.74		2826.95		1986.91
1454.03		2394.05		1866.26		1664.5		2213.04		1707.74		3493.89
1703.33		2342.79		2231.74		2553.91		2863.8		1994.34		1665.17
1781.67		1841.08		2143.7		4950.01		2543.64		2694.77		1649.35
2682.38		1758.74		1224.12		2533.9		1739.88		2031.49		2332.77
1756.6		1327.46		1204.48		1011.26		2141.26		2733.3		3084.4
2003.2		1666.39		1936.07		2099.31		2806.17		1557.55		3121.21
1601.14		1358.15		2541.8		1806.35		1810.54		2650.61		1447.57
1035.45		2452.4		2429.17		1558.9		3127.98		2629.2		1755.06
1352.43		1790.99		1555.87		1884.29		2611.29		2323.2		2627.2
2319.75		1604.19		1903.85		2035.9		3092.56		2449.51		1898.57
953.355		1683.16		1319.18		2473.13		2840.61		1967.4		3043.22
2014.97		1438.7		2211.88		946.841		2996.44		2791.32		1634.27
2999.21		2301.72		1918.11		2342.67		1955.47		2619.2		2103.09
		1991.15		1898.41		2792.58		2061.41		1534.3		4203.66
		1728.38		1398.77		1606.3		1753.77		2270.55		1423.91
		1292.61		4418.32		1415.87		1967.85		2062.81		1608.53
		2230.2		1864.27		2466.25		1776.37		2132.64		1971.51
		2019.41		1991.9		1504.34		2226.13		1897.81		1281.26
		1482.19		1704.29		2269.49		2583.29		2501.97		1753.24
		2068.64		1419.82		1805.25		2184.77		1740.92		1880.54
		1854.16		4823.78		1780.11		1893.97		2827.32		2191.67
		1919.84		1208.27		1766.68		2142.7		1825.49		2206.98
		1348.34		1746.87		1478.25		1843.76		1754.91		2071.39
		1932.13		1505.82		2360.64		2217.32		2223.66		2079.66
		2514.98		2400.04		2166.57		1779.37		2059.19		2981.05
		1825.03		1287.87		3049.97		2745.62		2283.36		2124.69
				1481.17		1799.3		2621.4		2796.01		1452.77
				2277.84		3059.8		1739.65		3324.61		2921.55
				1072.46		1360.95		1956.67		2206.26		2221.99
				2468.59		1888.46		941.984		2055.5		2634.02
				1433.7		2139.25		1546.65		2906.69		1781.62
				3034.32		1951.83		2484.05		1686.5		1593.87
				1466.31		1726.8		1707.59		2950.12		2020.43
				1577.77		1548.99		1952		2168.46		1603.11
				1688.61		3843.68		1814.92		1883.63		2677.97
				1923.32		1849.82		2671.46		2682.83		1724.84
				1635.39		2334.54		1751.05		3224.23		2670.12
				1898.06		1802.26		1666.15		2836.48		1540.58
				1458.75		2325.39				2215.56		1636.82
				2241.55		2063.75				1942.16		1749.19
				2588.39		3925.19				2656.86		1774.35
				2461.14		1515.19				2059.15		1742.77
				1504.49		1723.94				2205.04		2540.82
				1557.67		2229.75				2336.5		3643.07
				1305.99		2153.58				2605.81		2121.81
				1165.26		2933.63				1534.17		1865.35
				2421.8		2346.21				2268.3		1616.7
				1538.13		1416.58				2010.22		1909.5
						2304.65				2072.39		1586.48
						2459.47				1979.81		1769.32
						1877.95				1979.98		2198.5
						4734.48				2116.58		2647.58
						2281.42				2505.69		1836.84
						2117.98				1825.63		2345.25
						4966.41				2200		1644.35
						2812.83				2609.59		3472.06
						2301.84				2619.77		1987.6
						3077.6						1719.04
						3989.1						1996.58
						1592.59						2534.71
						2370.71						1852.18
						1403.28
						2641.87
						1581
						2689.64
						2093.48
						3430.03
						1809.69
						2336.32
						1703.78
						2014.89
						1423.3
						1889.57
						3430.37
						2353.13
						2255.38
						2459.64
						2733.84
						1799.35
						1483.23
						2067.45
						2452.05
						1949.36
						1443.71
						1385.45
						1081

## Sheet: osm shock
20181102_1		20181102_2		20181102_3		20181126_1		20181126_2		20181126_3		20181126_4		20181126_5		20181206_1		20181206_2		20181206_3		20181206_4		20190208		20190210		20190328_1		20190328_2		20210930		20211014_1		20211014_2		20211014_3		20211023_1		20211023_2		20211109		20211116_1		20211116_2
1749.27		1620.79		1504.04		1658.43		1588.73		1343.23		1667.88		1699.63		2112.47		1910.76		1785.25		1536.38		1401.33		1756.88		1721.17		1810.86		2367.35		1870.46		2073.81		1841.41		2265.47		2034.43		1815.06		2016.86		1978.19
405.028		460.31		421.081		371.987		431.977		291.626		386.968		321.35		532.785		602.102		399.078		307.414		419.538		430.837		450.574		405.89		459.128		311.323		415.598		389.26		361.718		318.423		346.624		402.572		320.637
113		113		61		52		44		41		42		88		52		92		55		21		45		42		142		69		54		67		75		40		90		54		72		95		74
1941.53		1711.86		1619.75		1785.4		1203.28		1279.88		1329.41		1723.99		1954.36		1447.47		1361.57		1868.9		1148.39		2969.87		1175.07		1903.8		2159.53		1426.87		1950.79		2216.37		2363		1818.39		1882.65		1915.22		1933.26
1101.89		1606.61		1177.6		1345.62		1591.29		1471.03		1853.21		1541.22		2234.84		2793.74		1339.1		1315.35		2922.74		1882.34		3046.76		1844.51		2240.99		1829.63		2027.36		2122.8		2762.34		1989.8		2445.68		1724.4		1970.12
1801.46		1055.7		1377.81		1113.53		1547.92		1064.32		1661.78		1354.79		2206		1854.35		2446.03		2090.54		2245.54		1742.93		2573.72		2248.47		2851.82		2353.65		2181.55		1668.08		2142.11		2349.47		1927.69		1683.56		1984.67
1482.15		2141.45		956.501		1820.29		1780.26		1404.84		1414.33		1875.2		1925.98		1936.35		1562.8		1211.87		1527		1367.38		1793.29		1768.81		2200.25		1220.64		2009.12		1841.25		1609.34		2280.01		1698.84		1324.91		1985.4
1929.45		1292.92		1630.27		1524.88		871.271		1184.7		1533.24		1614.19		1389.21		2321.26		1173.35		1431.46		2028.64		1583.42		1884.61		1799.4		1550.59		1629.85		1733.34		1626.27		1505.09		2169.15		2007.2		2078.21		1769.77
1673.89		1845.71		1143.72		1231.76		2192.04		1643.11		1632.54		1312.53		2539.24		1370.99		1561.8		1595.67		1311.53		1552.92		1153.24		2375.33		2651.39		2271.52		2606.98		1833.4		2357.1		2504.61		1492.08		1708.03		2201.01
1171.28		1487.59		1091.22		1539.8		2265.96		1134.06		2296.02		1709.14		2692.45		1436		2471.81		1446.65		904.751		1516.44		1304.6		1833.06		2754.06		1851.89		1808.28		1725.43		2130.94		2233.26		1532.98		1697.64		1705.79
1401.72		2190.46		1233.85		2257.39		1126.35		1358.14		2315.82		1532.8		2816.79		2479.66		1269.41		1581.22		1476.91		1604.07		1543.76		1485.62		3143.05		1801.54		2010.01		1674.9		2223.1		1392.58		1296.9		1948.1		1662.51
1467.89		2538.44		1493.49		1641.16		1189.51		942.682		1761.01		1372.72		1711.56		2025.58		1682.16		1593.29		1446.42		1618.11		1359.47		1981.43		2108.92		2050.46		1955.74		1457.5		2623.62		2187.55		1593.83		1715.52		1774.99
1661.75		1300.16		1847.57		2305.14		1032.05		1198.41		2241.8		1411.3		2188.59		1928.7		1538.95		1270.62		1305.91		2757.11		1719.07		1615.05		2639.13		2334.89		2342.38		2014.41		2334.97		1963		1910.01		1604.75		1696.51
2558.77		1383.8		1261.75		1810.86		2105.6		1728.14		1828.53		1615.18		2193.38		1589.32		2618.39		1799.78		1325.83		1844.08		1449.38		2414.23		2584.95		2072.7		2155.01		1532.11		2032.24		2055.27		2010.05		1585.54		1891.11
2419.44		2375.02		1474.83		1794.11		1084.01		926.312		1513.25		2208.34		2047.57		1814.84		1727.84		1593.13		998.272		1722.55		2574.56		1861.08		1783.11		1701.01		2303.43		1486.09		1897.06		2463.27		1507.24		2154.28		1514.89
1517.79		2538.58		984.874		1938.96		2305.77		1182.59		1473		1326.23		3808.2		1855.5		1940.48		1408.49		2015.27		1874.43		1110.88		888.877		2744.68		2241.84		2353.59		2390.62		2459.56		1856.18		1870.13		1706.88		1961.26
1437.43		2035.55		1562.03		1708.71		1063.52		1095.05		1603.99		1435.8		2294.46		1611.96		2424.04		1679.61		1304.9		1808.35		3324.73		1830.62		2246.77		2405.41		2799.05		2301.73		1823.12		2301.14		1878.19		1963.4		1452.54
1775.22		2508.15		1718.07		1947.81		1768.11		1437.56		1891.91		1114.09		1735.98		1765.59		1607.13		1719.58		1434.62		1355.1		1411.63		1854.47		2838.01		2107.69		2995.77		2903.89		1997.32		1769.6		1310.08		1767.12		2706.43
2376.1		1938.63		1246.94		1717.39		1031.48		1364.02		1743.52		1069.95		1880.18		3604.56		2445.2		908.519		1233.51		1735.37		1357.25		2433.46		2091.63		1814.67		1916.55		1984.72		2349.06		1312.35		2229.44		1882.69		2155.19
1594.82		1086.02		1466.26		2059.88		2166.02		1288.54		2379.24		1015.53		2572.87		2183.04		1486.76		1214.23		800.618		1285.84		781.66		1897.1		2711.57		1396.03		2814.88		1591.13		2276.91		1957.66		2093.34		2860.97		1661.57
1848.02		1570.06		1451.96		1834.81		1511.92		1555.15		2171.94		1781.99		1528.84		1563.36		2237.92		2289.17		1272.57		977.296		2215.04		1381.12		2401.07		1466.79		1348.11		2303.84		3276.26		1872.3		2004.8		1655.45		1538.6
2183.83		1914.08		1848.1		1879.66		1976.63		1232.27		1737.44		1616.05		2847.55		1854.99		1540.17		1325.63		1074.65		1632.71		1513.85		1507.04		2547.64		1890.1		1875.34		1735.92		2596.62		2260.08		1525.05		1632.32		2052.95
1907.25		2073.19		1225.33		1183.37		1213.56		1325.68		2331.14		1551.87		2523.14		2560.14		1416.25		1301.2		931.375		1725.93		1570.07		1172.26		2665.74		2018.17		1324.67		2255.53		2352.85		1953.12		2154.9		1702.88		2405.9
2415.72		1389.35		1993.63		1476.37		1602.11		1746.61		1206.97		1894.53		2024.3		1431.29		1505.36		1619.15		1319.91		1877.57		2093.27		2088.27		2622.35		1303.67		1771.68		1731.94		2666.88		2212.28		1745.14		1701.19		1733.46
2097.31		1443.06		1546.18		2155.02		1660.37		1621.49		2256.76		2527.66		2421.9		2802.13		1597.38				2095.66		1439.91		1551.12		1494.17		2668.82		1823.03		1892.02		1838.32		1700.18		2008.6		2062.01		1725.41		1805.8
2414.45		1395.4		879.049		1656.05		2152.02		1005.51		1401.06		1662.59		2100.7		1912.27		2326.86				1155.11		1561.02		1950.36		1755.59		3209.06		2491		1743.27		2179.88		2314.02		1937.72		1919.25		1839.64		1790.81
1546.07		1811.6		2440.63		1201.5		2157.26		955.422		1518.21		1771.7		2625.16		1549.04		2037.86				1657.09		1114.03		1400.59		2029.67		2509.07		1428.83		2576.96		1970.56		2177.55		1785.26		2267.73		1450.17		2860.74
1558.91		2170.46		1275.92		1389.88		2341.66		2193.8		1674.73		1421.22		1406.15		2081.8		1771.19				873.888		1343.56		1181.82		1658.23		1806.14		1944.03		1715.65		1722.03		2382.43		1810.47		1924.06		2561.74		2146
1575.08		1662.25		1213.47		1458.24		1583.44		1206.66		1177.3		2001.69		1734.72		1923.38		2080.7				1572.33		1658.56		2033.12		1372.53		1859.1		1780.25		1872.29		1814.44		2092.1		1842.2		1738.13		3011.83		2764.14
1096.97		703.25		1254.25		1658.34		1458.57		1585.24		2119.62		1337.64		1911.15		2173.61		2519.59				1503.41		1070.49		1217.83		1830.52		1620.3		1830.26		1957.67		1706.53		2341.66		2548.58		1603.03		3551.98		1861.96
2247.39		1158.63		965.109		1247.85		1762.51		1118.24		2147.63		1971.38		1619.72		1768.6		1817.54				1153.84		1641.91		2701.5		2632.27		2928.63		2050.52		2184.49		1417.76		2955.86		1649.26		1986.1		1910.67		2383.2
2042.39		1607.62		1707.84		2052.74		2191.73		1535.93		1728.74		1179.67		1330.7		1131.64		1719.35				1258.76		1813.86		1579.6		2126.04		2980.45		1462.43		2808.12		1842.28		3008.34		2129.7		1679.52		2119.97		2001.79
1870.88		1271.85		1391.75		1991.42		1801.68		1559.86		1928.29		1394.27		2889.3		1246.03		2548.37				1200.07		1460.39		1318.64		1473.67		2252.34		1805.67		1965.25		3082.75		2524.98		2069.29		1811.6		1756.55		1987.73
1762.25		1547.23		1792.02		1404.42		1588.56		1423.97		1327.6		2530.96		1594.71		1145.66		2440.47				1450.86		2023.92		1167.57		1995.61		2616.92		2507.09		1400.17		1679.79		2767.14		2175.27		1948.36		2194.16		2131.31
2159.18		1360.34		1506.62		878.072		1359.3		1874.63		1401.73		2148.45		1883.19		1052.82		2025.25				1644.11		2253.35		1466.58		1351.68		2225.98		2011		2157.46		1186.64		2126.25		2003.93		2397.1		1644.67		2331.9
1839.96		1289.15		2250.64		1681.44		1327.84		1047.1		1603.3		1541.07		2083.75		1178.21		1318.58				997.74		2289.79		1393.76		1224.67		1464.16		1705.09		2696.24		1828.97		2429.39		2247.91		2200.75		2062.81		1915.07
1526.23		1507.79		1324.12		1948.75		1393.89		1352.77		1174.67		1654.17		2296.97		1292.36		1582.36				1104.19		1852.79		1579.68		2291.26		1535.34		1506.12		2071.82		1850.06		2015.28		2121.96		1562.41		2218.46		2541.39
1556.62		2534.03		1080.3		2422.89		2007.35		1083.71		1801.03		1661.56		2429.14		1077.04		1410.47				1526.59		1475.32		1624.07		2435.94		3326.61		1707.32		2215.18		1687.43		2459.78		2261.32		1079.16		1709.79		1847.82
1641.77		1681.15		1719.46		1158.95		2275.93		1960.79		1008.19		1741.06		1983.6		1226.7		1487.95				1087.01		2095.28		1611.35		2644.83		1701.98		1729		1977.08		1423.75		1989.33		2667.61		1576.52		1951.42		2438.3
1580		1658.96		1835.16		1789.73		1377.64		1275.19		938.191		1756.9		1444.01		2241.2		1408.54				1192.45		2430.85		1784.48		1588.34		2721.96		1833.6		1364.53		1378.18		2266.25		2092.26		1638.91		2095.43		2060.08
1603.63		1434.97		2571.77		1350.65		1072.01		920.084		1399.6		1453.91		1311.64		2383.59		1637.89				1815.17		1028.48		1660.18		1517.56		3028.09		1713.79		1634.02		1886.87		1735.38		2607.82		1530.49		2307.87		2038.5
1420.74		1129.95		1581.54		1279.04		981.934		1154.92		1055.64		2086.78		1886.09		1267.55		1891.68				1405.72		2299.75		1975.74		1866.15		3121.6		2318.55		1810.24		1303.94		1671.22		2347.14		1693.55		2169.84		1861.98
2030.12		1006.73		2909.88		1793.58		1240.24		1516.24		1156.15		1677.2		3142.27		1744.08		2393.9				1461.82		2006.81		2844.15		2200.31		1995.16		2157.71		1958.94		1458.3		1947.75		1229		1178.56		1919		1535.29
2116.41		1467.67		1143.4		2368.7		1814.02		1117.84		1765.96		1853.35		1704.14		2705.06		1663.71				1215.51		2232.45		1695.89		1596.47		2150.52		1994.54		1996.66				2636.06		1866.97		1589.72		1769.77		1388.49
2593.84		1040.85		1031.57		2526.59		1305.73				1546.64		1669.19		2580.95		1329.2		1389.38				2295.49		2262.62		1256.03		1997.37		2562.53		1403.37		2062.96				2009.53		1428.31		1518.5		1872.51		2319.84
1979.12		1441.33		1262.41		1571.22		1097.7						1873.12		2590.76		1846.03		1392.77				1067.76				1616.14		1522.12		2348.23		2175.98		1855.71				1848.76		2395.33		2099.94		1909.47		1410.65
1703.1		2439.29		1004.13		1955.63		1324.02						1750.07		1530.91		1208.41		1775				1354.97				1629.1		1790.92		2234.51		2115.22		1497.88				2996.87		1674.91		1797.21		1991.52		2699.65
1436.13		2062.35		1285.95		1714.53								1916.73		2450.85		1285.4		1421.4				941.006				1573.27		1725.66		2064.52		2296.48		2355.8				2510.26		2242.88		1745		1934.32		2389.56
1801.82		1173.35		2111.6		1223.32								1790.47		1584.05		1282.71		1577.89								2495.94		1700.91		2065.57		1948.87		1709.22				2284.41		2029.32		1933.09		2241.06		1969.81
2165.69		1196.52		2477.9		1572.83								1477.32		2734.73		2386.39		1764.15								2365.99		2481.34		1990.77		1889.13		2118.37				2283.3		1709.54		1619.56		1977.45		2167.07
1373.45		1243.41		1209.12		1462.85								1751.22		1692.27		1243.96		2298.29								1854.54		1608.17		1992.47		1725.59		2660.37				2557.74		2171.06		2549.81		1613.25		2063.7
2048.43		1535.4		2089.07		1616.38								1828.25		1076.34		1608.52		2158.48								1369.76		1577.27		2313.27		1902.05		2171.87				2306.56		1879.09		1514.29		2245.67		2065.63
1129.54		1526.49		1489.12		1528.46								1691.99		2307.64		2343.73		1786.46								1871.18		1800.16		2322.04		1980.53		1621.97				1977.57		1798.74		1893.54		2597.09		1918.01
1772.45		1578.03		1755.58		1028.21								2101.89		2630.22		1855.58		1669.79								3105.76		830.07		1730.61		1601.11		3043.91				2323.16		2349.99		1515.33		1821.18		2011.48
1820.06		1521.24		1476.7		1234.01								1286.24		1755.33		2791.89		1431.2								1558.07		1783.98		2006.57		1888.8		2506.87				2592.93		1934.9		1377.05		2209.07		2187.79
1218.37		2039.83		1566.39										1688.61				1698.9		1361.6								1179.12		1463.96		2110.36		1743.45		2081.19				2485.09		1558.19		1359.78		1832.63		2221.29
2181.5		1725.34		1281.64										1431.22				1808.25		1718.71								2164.07		1852.81		2835.95		1705.73		2609.93				2663.07		2383.39		2242.68		2528.64		1647.62
1706.61		1729.76		1598.42										1214.35				2614.44		1407.49								2407.63		1635.39				2327.94		2419.1				2354.12				1877.78		1743.98		1911.6
1504.75		1355.12		1148.78										1625.7				2614.47										1627.59		1937.35				2047.38		2278.69				1981.46				1789.51		1733.54		2192.28
1498.99		2381.28		1393.88										2230.75				2687.99										1244.3		3181.7				1714.26		2008.73				2007.78				1490.85		2203.21		1825.02
1464.73		1245.67		1641.02										1576.62				1601.15										1512.72		1545.13				1897.71		2286.1				1673.69				1493.54		2183.51		2261.96
1913.97		1571.07		1210.23										1395.41				1439.87										1825.81		1904.65				1866.86		2814.78				2720.11				1419.55		1906.8		1738.38
1532.84		924.11		1481.83										1813.62				3181.54										2084.89		1230.4				1278.99		2633.16				2099.25				2060.3		2016.7		1704.89
1915.52		1535.55		1036.64										1874.84				2204.73										1820.36		1457.95				1900.26		2198.37				2951.97				1530.05		2125.46		1420.7
1513.82		1378.64												2170.45				1670.2										1910.17		1653.89				1677		1864.61				2248.52				2339.94		1783.7		1666.44
1757.51		1682.96												1540.26				1299.23										1343.43		2029.31				2012.46		2056.22				2374.23				1820.92		1982.86		1855.82
1518.42		1233.86												1761.69				2308.57										1636.02		1658.39				1504.49		2063.48				2314.69				1339.34		3199.17		1693.17
1866.13		962.079												1512.89				2285.43										1676.44		1767.77				2009.04		2110.89				2732.62				2230.25		2024.53		1885.27
2243.99		1527.11												1648.32				2065.54										1443.25		1701.99				2402.34		2268.8				2660.93				1400.33		2251.8		2422.37
2650.69		2118.25												1401.55				1970.67										1471.01		2112.82				1317		1497.53				2764.64				2450.51		2073.31		1768.79
1329.46		835.603												1651.65				2106.98										1768.66		2287.74						1664.77				2150.01				2644.51		2470.54		2312.47
1501.42		2055.69												1825.1				2469.64										1758.9		1440.92						2632.75				2763.8				1888.15		1651.55		1751.13
1765.75		2490.27												1611.48				2092.01										1892.51								1397.01				2638.57				2234.87		1949.03		1839.25
1492.2		2082.69												1428.03				1261.03										1514.63								1409.25				2173.52				1545.46		3353.45		1748.88
2391.08		1687.76												1347.33				1408.8										1120.65								1615.82				2549.35				2459.41		1390.69		1934.67
1270.02		2093.55												1728.76				4346.87										1545.65								2412.52				1788.85						2085.05		2026.7
1514.6		1138.26												2396.05				1260.21										1559.58								1924.93				2299.02						1702.65		1903.8
1000.69		1253.2												2148.29				2009.02										1386.27								1400.79				1986.51						1756.15
1233.09		1140.4												2160.38				1427.65										2365.13												1960.96						2163.43
1402.29		1469.66												1293.88				1410.59										2216.47												1878.94						2334.06
2156.94		1302.77												1617.76				1584.31										1563.37												1678.63						2641.11
1545.63		1845.89												2019.32				1606.04										1781.54												2023.52						2419.88
1174.92		1649.75												1785.75				1709.63										1779.57												2186.63						1487.26
1605.53		1206.23												2094.52				1299.12										1753.31												1960.98						2062.55
1815.55		1190.09												2120.38				2134.75										1391.33												1704.75						1379.8
2220.6		2442.94												1860.68				2815.43										1611.61												1796.03						2173.17
2704.49		1338.05												1681.97				1898.86										2404.52												2221.38						2240.57
967.28		1088.27												2319.13				1894.83										1498.9												2110.04						2846.76
2228.01		2213.83												1747.77				2573.29										2541.38												2159.13						1761.34
1597.21		1034.16												2084.64				1007.02										2443.83												2481.99						2335.45
2150.96		1350.75												1171.31				2212.15										1389.89												1697						2116.85
1679.58		1403.38																2833.91										2285.28												2160.61						2137.9
1041.82		1774.43																2067.59										1399.74												2478.73						1898.53
1678.09		2655.19																2879.38										1902.09																		2011.23
1510.32		1782.99																1516.66										2216.19																		1734.37
1585.48		2072.95																										1623.89																		1944.75
1456.33		1054.27																										1389.29																		1691.21
2855.32		2055.81																										1540.82																		1875.86
2076.34		1569.37																										1493.47
1452.14		1453.97																										2572.76
1408.66		2366.31																										1709.93
1355.99		1132.38																										1755.92
1260.55		3086.79																										2019.79
1894.26		2030.45																										1533.64
1390		1392.4																										1436.18
1765.42		1398.35																										1263.23
1384.52		1421.38																										1999.47
2361.07		1197.44																										1611.18
1658.12		1128.89																										2011.4
1123.11		1302.75																										1668.99
1881.63		1259.44																										1332.9
1656.88		1741.84																										1299.56
2181.19		1229.88																										2073.52
1534.08		1712.01																										1737.36
2426.57		1919.74																										1684.49
2317.18		2102.15																										1596.71
																												1346.64
																												1384.79
																												1572.04
																												1146.85
																												1925.65
																												1874.95
																												1960.52
																												2021.76
																												1314.78
																												1401.62
																												1246.51
																												2248.19
																												1514.67
																												1588.47
																												1384.06
																												1773.21
																												2694.25
																												2650.59
																												1234.19
																												2200.96
																												1471.14
																												1250.18
																												1483.63
																												1332.46
																												1411.32
																												1405.77
																												1870.32
																												1324.65
																												1189.33
[truncated: 8 more columns]

## Sheet: all
exp	V	stdev	%dif with average	stdev
20180220_30	1874.76	476.318	0.119202	25.4372		0.119202
20180220_60	1948.73	521.445	4.06979	27.8471		4.06979
20180308	1921.98	648.328	2.641	34.6232		2.641
20180516	2256.19	771.855	20.489	41.22		20.489
20200526	2143.04	486.337	14.4467	25.9722		14.4467
20200609	2265.06	489.207	20.9631	26.1255		20.9631
20211026	2105.27	587.918	12.4292	31.3971		12.4292
20181102_1	1749.27	405.028	-6.58225	21.63		6.58225
20181102_2	1620.79	460.31	-13.4439	24.5823		13.4439
20181102_3	1504.04	421.081	-19.6783	22.4874		19.6783
20181126_1	1658.43	371.987	-11.4336	19.8655		11.4336
20181126_2	1588.73	431.977	-15.1558	23.0692		15.1558
20181126_3	1343.23	291.626	-28.2663	15.5739		28.2663
20181126_4	1667.88	386.968	-10.9286	20.6656		10.9286
20181126_5	1699.63	321.35	-9.23315	17.1613		9.23315
20181206_1	2112.47	532.785	12.8141	28.4527		12.8141
20181206_2	1910.76	602.102	2.04197	32.1545		2.04197
20181206_3	1785.25	399.078	-4.66079	21.3123		4.66079
20181206_4	1536.38	307.414	-17.9513	16.4171		17.9513
20190208	1401.33	419.538	-25.1635	22.4049		25.1635
20190210	1756.88	430.837	-6.17591	23.0084		6.17591
20190328_1	1721.17	450.574	-8.08316	24.0624		8.08316
20190328_2	1810.86	405.89	-3.29292	21.6761		3.29292
20210930	2367.35	459.128	26.4255	24.5192		26.4255
20211014_1	1870.46	311.323	-0.110209	16.6258		0.110209
20211014_2	2073.81	415.598	10.7496	22.1945		10.7496
20211014_3	1841.41	389.26	-1.66164	20.788		1.66164
20211023_1	2265.47	361.718	20.985	19.3171		20.985
20211023_2	2034.43	318.423	8.64612	17.005		8.64612
20211109	1815.06	346.624	-3.06892	18.5111		3.06892
20211116_1	2016.86	402.572	7.70812	21.4989		7.70812
20211116_2	1978.19	320.637	5.64282	17.1233		5.64282
20211116_3	2143.68	376.1	14.4805	20.0852		14.4805
20211116_4	1876.99	271.206	0.238619	14.4834		0.238619
average	1872.53					10.8759	7.98054
