# Supplementary material for: A mechano-osmotic feedback couples cell volume to the rate of cell deformation
Source: eLife journal article supplement (doi:10.7554/elife.72381), 2022-04-13
Supplement: supp [file Vi_HeLa_drugs.xlsx]

## Sheet: Vi_conditions
	Vi	stdev	Vi (%)	stdev	% difference with control
control, n=194	1918.57	570.115	100	29.7157
Y-27, n=121	1747.78	475.256	91.098	24.7714	-8.90201
EIPA, n=117	1840.97	527.89	95.9554	27.5148	-4.04455
EIPA+Y-27, n=50	2027.42	549.995	105.673	28.667	5.67346
LatA, n=41	1687.79	454.113	87.9713	23.6694	-12.0287
GdCl3, n=40	2071.88	599.347	107.991	31.2393	7.99099
CK-666, n=54	1962.46	585.725	102.288	30.5293	2.28764
CK-666+Y-27, n=74	1985.97	587.305	103.513	30.6116	3.51316
NSC, n=101	2400.93	517.116	125.142	26.9532	25.1421
NSC+Y-27, n=16	1884.52	512.203	98.2256	26.6971	-1.7744
MnCL2, n=57	1777.89	471.174	92.6675	24.5586	-7.33249
ML-7, n=79	2463.69	612.089	128.413	31.9034	28.4128
control_fast, n=42	1967.54	491.274	102.553	25.6063	2.55252
control_moderate, n=43	1783.3	448.653	92.9497	23.3848	-7.05032
control_slow, n=42	1832.28	434.721	95.5023	22.6586	-4.49767

## Sheet: p value
control	Y-27	EIPA	EIPA+Y-27	LatA	GdCl3	CK-666	CK-666+Y-27	NSC	MnCl2		control_fast	control_moderate	control_slow		p-value:	VS control with unequal variance
1468.79	2247.62	2202.88	1717.52	1595.83	2306.57	2657.57	2502.34	2826.8	1362.21		3239.04	1738.7	1555.87		Y-27	0.00521624	significant difference
2925.37	1470.5	2102.84	2073.81	1524.34	1384.47	1834.38	1574.54	2373.95	3031.2		3142.55	2518.59	1866.26		EIPA	0.223959	FALSE
1968.28	2818.32	1401.16	1914.03	1353.82	1681.05	1524.59	2194.84	1663.32	1606.46		1760.27	1923.32	1520.31		EIPA+Y-27	0.222189	FALSE
1213.45	1680.36	2369.05	1567.71	1318.11	1590.96	1301.61	1997.28	2004.78	1500.89		2172.12	1458.75	1825.97		LatA	0.00668572	significant difference
2410.09	2066.08	1761.72	1379.38	2605.81	1522.25	1870.95	1535.73	2619.92	2260.36		2421.8	1147.19	1597.72		GdCl3	0.149914	FALSE
1638.48	2069.34	2046.3	2549.06	1556.78	1768.31	1870.05	1040.07	1480.59	1572.65		1419.82	1664.82	1454.76		CK-666	0.627575	FALSE
1597.72	2591.99	1457.42	2310.58	2152.55	1934.08	1775.3	1901.48	1535.52	1958.32		1846.46	1998.06	2008.32		CK-666+Y-27	0.400153	FALSE
2811.4	1588.35	2103.51	1381.5	1769.16	1113.55	1332.08	1935.74	1798.25	1645.35		1604.19	1481.17	1602.04		NSC	9.93066e-12	significant difference
2064.79	1679.81	1389.03	1680.5	2124.15	2282.88	1714.11	1533.13	2197.86	1962.8		2168.06	1305.99	2231.74		MnCl2	0.416589	FALSE
1789.43	1632.82	2168.63	2183.59	1513.79	1728.22	1400.52	1239.85	2438.68	2370.91		1466.31	2400.04	2468.59		control_fast	0.570976	FALSE
2161.32	1513.14	1577.76	1217.04	1311.83	1631.7	2214.21	1728.25	2145.38	2052.68		2476.01	1936.07	2367.96		control_moderate	0.0932845	FALSE
1680.04	2704.62	1593.62	2928.95	1648.15	1541.04	1211.71	1608.35	2223.9	2366.4		1837.37	2293.23	1430.39		control_slow	0.274706	FALSE
2026.2	3116.4	1143.18	1181.24	2080.06	2014.57	1526.93	2042.3	3080.56	1777.95		1683.16	1918.11	2593.77
1452.19	1107.05	2204.11	1727.28	1566.91	2483.41	1418.36	2612.41	2251.97	1378.29		1788.09	1224.12	2461.14
1554.35	2273.34	1728.96	1649.29	3262.13	2398.46	1712.86	2267.46	2086.68	1183.62		1438.7	1746.87	1864.27		1967.54	1783.3	1832.28
2507.59	2739.29	1668.97	1727.76	1440.49	1462.05	2731.05	2339.65	2321.14	1580.86		2074.81	1319.18	1500.64		491.274	448.653	434.721
2074.26	1737.45	1141.36	1262.54	1259.38	1339.13	1838.72	1511.61	2422.58	2802.21		1983.87	1671.55	2455.18		42	43	42
1215.81	2222.97	2994.8	2574.23	2699.67	2128.23	1403.4	1104.92	1771.62	1951.83		1898.06	1594.03	1507.67
1420.28	1883.63	2103.45	1949.67	1578.67	1380.06	1599.57	2005.47	2463.58	1895.88		1525.04	1703.33	3195.67		1967.54	1783.3	1832.28
2667.57	2132.18	1838.29	2158.39	1782.03	2259.5	1783.55	2120.46	2255.77	2076.73		2463.14	1504.49	1870.3		491.274	448.653	434.721
2601.67	1443	1764.01	2175.62	1417.5	2483.64	1768.36	2310.65	3250.87	2181.32		2455.49	2287.87	2109.67		42	43	42
1660.94	2523.36	1699.19	2031.59	1977.97	2314.4	2556.54	1375	2325.32	1659.99		2600.4	2165.8	1957.73
2234.58	2123.75	1961.7	1962.92	1305.51	1418.41	1865.4	1741.84	1912.97	2685.6		1663.21	2626.51	1655.06
1531.78	1752.66	1940.86	2266.12	1764.5	1240.01	1797.71	1138.73	3227.56	1428.79		2197.61	1481.93	1465.72
2183.46	2032.15	1316.19	2229.35	1184.67	2174.36	1111.15	1836.95	2023.22	2951.37		1554.35	2410.09	1991.9
1430.39	1543.45	1513.61	3173.45	1894.03	1737.56	1639.29	1759.03	2531.02	1892.02		2034.93	1433.7	1903.85
1535.57	2164.87	1586.53	2084.16	1693.15	2626.22	1570.4	2431.54	2264.11	2649.1		1557.67	2230.2	2143.7
1771.58	1367.63	1432.61	2440.73	1476.44	1485	1617.49	1871.95	2176.1	2274.47		1667.99	2211.88	1218.55
1983.87	1755.23	2096.54	1893.2	1672.96	2135.01	1837.8	1996.46	2440.91	1504.97		1490.27	2071.09	1159.62
1404.36	1381.78	1325.98	2853.85	1351.05	1845.04	1623.53	2417.23	2385.22	1914.5		1072.46	2735.4	2394.05
1947.76	1803.22	1260	1502.67	1251.81	2135.28	1403.69	1356.08	2422.68	2559.15		1398.77	2008.86	1688.61
2109.67	1738.19	2576.53	3157.08	1992.17	2302.66	1625.68	1845.4	2102.87	2343.64		2588.39	1041.56	1527.44
1825.97	1178.33	1203.54	3041.7	1949.74	2172.54	1884.43	1939.25	1937.9	1900.02		1991.15	1635.39	1630.6
1325.94	1843.63	1914.38	2481.59	1759.23	1366.92	1052.11	3680.51	2840.05	1582.23		2086.97	1390.41	1324.47
1977.95	1065.54	1215.37	1637.31	1209.69	1643.73	1241.08	2941.19	2721.32	1985.1		2277.84	1165.26	1898.41
1868.34	805.974	1987.41	1968.82	878.389	1902.37	1164.19	2804.89	2670.48	1777.89		2593.04	1577.77	1050.86
2039.14	1965.57	1397.16	2212.48	1691.17	1642.33	1155.41	1865.18	3316.56	1332.49		1947.76	1617.16	1516.06
1454.03	1420.87	1332.12	1240.57	1801.07	1827.45	2691.97	2350.37	2742.99	2618.61		1493.38	2241.55	1505.82
1703.33	1436.06	1062.55	1649.15	2216.31	1469.46	2768.14	1940.45	2107.53	2169.47		1489.46	2323.11	1982.7
1781.67	1585.77	2164.74	3169.27	1573.6	2114.13	2312.61	1436.27	2457.03	1606.74		1299.77	1282.15	1867.27
2682.38	2014.89	1915.44	1898.19	994.679	1957.69	3038.87	1952.39	3472.41	1250.28		2523.85	1704.29	1946.43
1756.6	2115.57	1818.2	1420.57		2793.81	1789.73	2459.08	3082.49	1556.41		2242.96	1287.87	1638.48
2003.2	1806.42	1030.94	2196.17		3004.4	1955.66	2941.39	2451.17	2203.4			1204.48
1601.14	1921.32	1738.45	1442.29		2647.33	3248.15	1824.48	3259.71	1551.93
1035.45	1906.74	1744.19	1443.01		3195.1	3057.29	1644.89	2612.73	1409.33
1352.43	1520.47	1705.87	1896.57		3288.37	2216.29	2757.02	2592.61	1445.07
2319.75	1753.94	1386.46	2538.22		3333.26	2483.9	1449.19	2167.53	1494.36
953.355	1295.85	1525.02	1204.39		1118.11	2843.43	1361.86	2981.94	1983.48
2014.97	1359.69	1410.47	2218.07		1946.35	2507.76	1815.6	3185.4	1424.36
2999.21	2004.96	1619.05	2807.61		1960.08	2388.87	1852.53	2610.07	1162.19
2068.95	2347.11	1731.03			2715.87	2982.77	2197.32	2443.43	1564.79
2031.46	2333.81	1987.35			3422.66	2506.42	1583.5	2552	2257.63
1630.6	1483.8	1894.23			2897.15	2775.71	1929	2473.36	1510.03
2245.4	1760.3	3085.09			2346.67	2769.29	1840.12	2695.66	1187.8
3142.55	2404.98	2124.96			3339.5		1069.13	2221.63	1566.03
1041.56	1021.33	1831.88					1510.6	2533.22	1409.43
1646.51	1551.24	1750.8					1716.96	2730.41	1565.47
2994.01	1755.43	1382.79					1236.97	2337.02
1795.73	1484.7	1948.65					1322.72	2481.03
2404.41	1665.96	1222.44					1992.02	2817.68
1478.22	1575.06	1740.64					2866.15	2500.52
1338.84	2332.46	1752.15					1013.64	3014.56
2631.78	1481.92	1699.19					1875.81	2400.93
1798.71	2003.6	2289.79					2648.59	2944.28
2397.04	1118.24	1541.04					1275.43	2657.92
1948.94	1241.34	1530.62					2871.81	3127.77
1667.99	1390.58	1954.89					2723.02	3065.29
2330.03	1341.04	2131.96					1812.83	2533.35
2751.88	1528.31	841.133					1590.56	2918.24
1806.3	1968.48	1783.05					3256.64	1521.26
1663.21	1656.13	1869.18					2229.72	2258.26
1482.48	1640.57	1358.45					3517.02	2697.93
1563.25	2724.35	2277.51					3041.75	2131.95
3239.04	1173.63	1608.98					1947.09	1678.59
3576.08	1178.79	1989.74						2046.18
1649.8	1604.4	1186.18						2142.4
2463.14	1209.06	1655.6						2519.04
1493.38	1401.85	1834.38						1745.3
1864.03	1929.27	2160.8						1747.95
1315.4	1410.72	2145.31						2172.69
1462.04	2735.84	2991.07						2108.24
1617.16	1238.58	1555.89						1741.05
1324.15	2424.38	1838.3						2148.46
2593.04	1925.07	2603.57						2040.68
2575.96	1950.21	1413.34						1478.33
1483.25	2416.79	1765.32						2409.43
2086.97	1322.21	1752.8						2588.31
2394.05	1035.79	1853.07						4467.21
2342.79	1294.18	1195.68						1786.4
1841.08	1565.07	1514.92						2695.87
1758.74	1394.2	2441.83						2502.31
1327.46	1468.69	1495.22						1843.82
1666.39	1724.01	1323.54						1978.16
1358.15	1242.14	1208.96						2328.8
2452.4	1617.24	1184.25						1367.95
1790.99	1216.69	1822.09						3353.6
1604.19	1175.22	1432.95						1774.86
1683.16	1973.99	2864.1						2381.26
1438.7	1104.29	1194.27						1323.06
2301.72	1735.09	1472.36						2099.94
1991.15	1358.68	1590.17						1782.36
1728.38	920.165	2579.4
1292.61	1208.1	2086.87
2230.2	1274.06	3196.7
2019.41	3016.29	2096.81
1482.19	1291.1	2948.31
2068.64	1887.28	1239.38
1854.16	1355.92	3451.54
1919.84	1314.54	2522.69
1348.34	1801.45	1770.9
1932.13	2303.43	1717.98
2514.98	2417.61	2178.24
1825.03	1686.08	2748.13
1946.43	1870.62	2426.11
2165.8	1563.96	3672.18
2523.85	1479.82	1647.34
1671.55	3841.83	2645.13
2008.32	2018.5
3521.94	1702.77
2242.96	1496.69
1465.72	1963.41
1489.46	1891.43
2153.14	1318.31
1527.44	1557.84
1390.41
2287.87
2034.93
2626.51
1867.27
1218.55
1594.03
2323.11
1525.04
1602.04
2074.81
1647.86
2518.59
1982.7
1516.06
1147.19
2071.09
1159.62
1490.27
3195.67
2197.61
1664.82
1481.93
2172.12
1050.86
2455.18
1866.26
2231.74
2143.7
1224.12
1204.48
1936.07
2541.8
2429.17
1555.87
1903.85
1319.18
2211.88
1918.11
1898.41
1398.77
4418.32
1864.27
1991.9
1704.29
1419.82
4823.78
1208.27
1746.87
1505.82
2400.04
1287.87
1481.17
2277.84
1072.46
2468.59
1433.7
3034.32
1466.31
1577.77
1688.61
1923.32
1635.39
1898.06
1458.75
2241.55
2588.39
2461.14
1504.49
1557.67
1305.99
1165.26
2421.8
1538.13

## Sheet: dV(Vi)
Vi	minus deltaV% at t of V loss	minus deltaV um3
1468.79	-10.0524	-147.648
2925.37	-9.06027	-265.046
1968.28	-6.51538	-128.241
1213.45	-3.26239	-39.5874
2410.09	-11.3324	-273.12
1638.48	-4.41312	-72.308
1597.72	-9.19791	-146.957
2811.4	-4.46364	-125.491
2064.79	-6.4591	-133.367
1789.43	-3.38085	-60.498
2161.32	-8.66486	-187.276
1680.04	-10.5889	-177.897
2026.2	-14.7518	-298.902
1452.19	-3.20702	-46.5719
1554.35	-10.6915	-166.183
2507.59	-16.4762	-413.156
2074.26	-12.8424	-266.385
1215.81	-7.36196	-89.5071
1420.28	-1.06732	-15.1589
2667.57	-9.24647	-246.656
2601.67	-7.30757	-190.119
1660.94	-10.9596	-182.032
2234.58	-12.2342	-273.384
1531.78	-9.09844	-139.368
2183.46	-10.4647	-228.491
1430.39	-9.13167	-130.618
1535.57	-12.7332	-195.527
1771.58	-6.70279	-118.746
1983.87	-7.67284	-152.219
1404.36	-4.21588	-59.206
1947.76	-10.388	-202.333
2109.67	-13.3361	-281.348
1825.97	-8.49064	-155.037
1325.94	-9.3845	-124.433
1977.95	-3.76468	-74.4636
1868.34	-8.08295	-151.017
2039.14	-4.89255	-99.7657
1454.03	-5.07771	-73.8315
1703.33	-6.90118	-117.55
1781.67	-8.05864	-143.578
2682.38	-0.550281	-14.7607
1756.6	-5.5079	-96.7518
2003.2	-2.4824	-49.7273
1601.14		0
1035.45		0
1352.43	-2.2126	-29.9238
2319.75	-1.69301	-39.2735
953.355	-6.48214	-61.7978
2014.97	-10.1453	-204.425
2999.21	-3.94126	-118.207
2068.95	-5.98353	-123.796
2031.46		0
1630.6	-4.05101	-66.0558
2245.4	-4.85804	-109.082
3142.55	-14.6239	-459.564
1041.56	-2.43014	-25.3113
1646.51	-17.048	-280.697
2994.01	-1.5867	-47.5061
1795.73	-7.64849	-137.346
2404.41	-10.7557	-258.612
1478.22	-40.9711	-605.645
1338.84	-3.73296	-49.9783
2631.78	-11.6373	-306.267
1798.71	-10.2115	-183.675
2397.04	-11.8388	-283.78
1948.94	-14.1447	-275.672
1667.99	-8.29051	-138.285
2330.03	-6.78017	-157.98
2751.88		0
1806.3	-8.3476	-150.782
1663.21	-13.1477	-218.674
1482.48	-14.5749	-216.071
1563.25	-12.6607	-197.919
3239.04	-17.24	-558.41
3576.08	-14.8429	-530.796
1649.8	-2.14811	-35.4396
2463.14	-11.4707	-282.54
1493.38	-24.6883	-368.69
1864.03	-7.96397	-148.451
1315.4		0
1462.04		0
1617.16		0
1324.15		0
2593.04		0
2575.96		0
1483.25		0
2086.97	-9.39807	-196.135
2394.05		0
2342.79		0
1841.08	-8.69142	-160.016
1758.74	-13.9966	-246.163
1327.46	-3.36945	-44.7281
1666.39	-4.97122	-82.8396
1358.15	-5.32578	-72.3321
2452.4	-11.5196	-282.506
1790.99	-9.64072	-172.665
1604.19	-9.07396	-145.563
1683.16	-9.15924	-154.165
1438.7	-5.10793	-73.4879
2301.72	-14.1507	-325.708
1991.15		0
1728.38	-11.4568	-198.017
1292.61	-7.56178	-97.7443
2230.2	-5.00372	-111.593
2019.41		0
1482.19		0
2068.64	-2.76684	-57.236
1854.16		0
1919.84	-19.0001	-364.771
1348.34		0
1932.13		0
2514.98		0
1825.03	-25.1029	-458.135
1946.43	-8.24889	-160.559
2165.8	-13.882	-300.656
2523.85	-0.725917	-18.3211
1671.55	-0.925401	-15.4685
2008.32	-10.002	-200.871
3521.94	-6.86126	-241.65
2242.96		0
1465.72	-3.67325	-53.8396
1489.46	-11.5475	-171.996
2153.14	-14.9268	-321.395
1527.44	-15.2438	-232.841
1390.41	-5.4149	-75.2895
2287.87	-8.13893	-186.209
2034.93	-13.0422	-265.4
2626.51	-7.29755	-191.671
1867.27	-0.86992	-16.2437
1218.55		0
1594.03	-18.0529	-287.768
2323.11	-0.964368	-22.4033
1525.04	-6.73002	-102.636
1602.04	-2.77213	-44.4105
2074.81	-10.6406	-220.772
1647.86	-3.4037	-56.088
2518.59	-4.98969	-125.67
1982.7	-13.2874	-263.45
1516.06	-3.8061	-57.7027
1147.19	-7.57461	-86.8953
2071.09	-12.0528	-249.626
1159.62	-5.93964	-68.8774
1490.27	-1.56081	-23.2602
3195.67	-12.828	-409.94
2197.61	-10.1656	-223.401
1664.82	-5.56921	-92.7174
1481.93	-11.2352	-166.499
2172.12	-12.1975	-264.945
1050.86		0
2455.18	-9.14355	-224.491
1866.26		0
2231.74	-3.50163	-78.1472
2143.7		0
1224.12	-6.33112	-77.5007
1204.48	-9.57099	-115.281
1936.07	-6.80739	-131.796
2541.8	-8.04713	-204.542
2429.17	-8.59992	-208.907
1555.87	-11.2417	-174.906
1903.85	-7.64837	-145.613
1319.18	-8.00079	-105.545
2211.88	-3.05998	-67.6831
1918.11	-8.47041	-162.472
1898.41	-7.18004	-136.307
1398.77	-6.48789	-90.7507
4418.32	-11.2825	-498.497
1864.27		0
1991.9	-4.25199	-84.6957
1704.29	-9.84291	-167.752
1419.82	-6.62482	-94.0603
4823.78	-7.95893	-383.921
1208.27	-5.20075	-62.839
1746.87		0
1505.82		0
2400.04	-11.7786	-282.69
1287.87	-8.97322	-115.563
1481.17	-13.1562	-194.865
2277.84	-13.367	-304.479
1072.46	-8.82414	-94.6357
2468.59	-3.40408	-84.0327
1433.7	-12.9005	-184.955
3034.32	-10.637	-322.762
1466.31	-8.09103	-118.64
1577.77	-5.9683	-94.166
1688.61	-12.2497	-206.85
1923.32	-7.34288	-141.227
1635.39	-6.27195	-102.571
1898.06	-9.62942	-182.772
1458.75	-2.66524	-38.8792
2241.55	-10.0411	-225.076
2588.39	-2.3656	-61.2311
2461.14	-5.92655	-145.861
1504.49	-10.1545	-152.774
1557.67	-9.86672	-153.691
1305.99	-11.6294	-151.879
1165.26	-5.01903	-58.4848
2421.8	-7.16181	-173.445
1538.13	-8.51298	-130.941
