# Supplementary material for: A mechano-osmotic feedback couples cell volume to the rate of cell deformation
Source: eLife journal article supplement (doi:10.7554/elife.72381), 2022-04-13
Supplement: supp [file Vloss_control.xlsx]

## Sheet: Sheet1
dV
-10.0524
-9.06027
-6.51538
-3.26239
-11.3324
-4.41312
-9.19791
-4.46364
-6.4591
-3.38085
-8.66486
-10.5889
-14.7518
-3.20702
-10.6915
-16.4762
-12.8424
-7.36196
-1.06732
-9.24647
-7.30757
-10.9596
-12.2342
-9.09844
-10.4647
-9.13167
-12.7332
-6.70279
-7.67284
-4.21588
-10.388
-13.3361
-8.49064
-9.3845
-3.76468
-8.08295
-4.89255
-5.07771
-6.90118
-8.05864
-0.550281
-5.5079
-2.4824
-2.2126
-1.69301
-6.48214
-10.1453
-3.94126
-5.98353
-4.05101
-4.85804
-14.6239
-2.43014
-17.048
-1.5867
-7.64849
-10.7557
-40.9711
-3.73296
-11.6373
-10.2115
-11.8388
-14.1447
-8.29051
-6.78017
-8.3476
-13.1477
-14.5749
-12.6607
-17.24
-14.8429
-2.14811
-11.4707
-24.6883
-7.96397
-9.39807
-8.69142
-13.9966
-3.36945
-4.97122
-5.32578
-11.5196
-9.64072
-9.07396
-9.15924
-5.10793
-14.1507
-11.4568
-7.56178
-5.00372
-2.76684
-19.0001
-25.1029
-8.24889
-13.882
-0.725917
-0.925401
-10.002
-6.86126
-3.67325
-11.5475
-14.9268
-15.2438
-5.4149
-8.13893
-13.0422
-7.29755
-0.86992
-18.0529
-0.964368
-6.73002
-2.77213
-10.6406
-3.4037
-4.98969
-13.2874
-3.8061
-7.57461
-12.0528
-5.93964
-1.56081
-12.828
-10.1656
-5.56921
-11.2352
-12.1975
-9.14355
-3.50163
-6.33112
-9.57099
-6.80739
-8.04713
-8.59992
-11.2417
-7.64837
-8.00079
-3.05998
-8.47041
-7.18004
-6.48789
-11.2825
-4.25199
-9.84291
-6.62482
-7.95893
-5.20075
-11.7786
-8.97322
-13.1562
-13.367
-8.82414
-3.40408
-12.9005
-10.637
-8.09103
-5.9683
-12.2497
-7.34288
-6.27195
-9.62942
-2.66524
-10.0411
-2.3656
-5.92655
-10.1545
-9.86672
-11.6294
-5.01903
-7.16181
-8.51298
