# Supplementary material for: A mechano-osmotic feedback couples cell volume to the rate of cell deformation
Source: eLife journal article supplement (doi:10.7554/elife.72381), 2022-04-13
Supplement: supp [file Vloss_y27.xlsx]

## Sheet: Sheet1
dV
-16.4055
-16.2188
-16.1145
-7.72631
-20.0108
-32.232
-5.96683
-26.2297
-28.8946
-25.0614
-17.1198
-37.4984
-9.54866
-22.5622
-6.39808
-18.7921
-19.6733
-15.7642
-25.2743
-10.0548
-27.6034
-20.1486
-5.46288
-8.29833
-16.5602
-7.43174
-19.8646
-17.6574
-19.7832
-15.8038
-12.7543
-10.7134
-15.1601
-5.80477
-28.043
-13.7902
-24.7349
-13.5437
-10.9248
-3.39877
-10.272
-16.9415
-14.0221
-19.3331
-23.9384
-31.186
-20.6734
-10.2111
-20.8567
-6.98388
-27.5582
-27.2569
-14.4462
-8.03027
-16.5676
-35.0603
-7.99778
-13.5992
-11.8474
-15.9017
-12.3713
-8.74938
-7.53826
-19.9457
-8.49178
-3.5258
-8.00315
-26.7115
-2.99887
-18.523
-22.4447
-17.3594
-6.41089
-10.67
-14.2831
-21.2925
-17.7953
-9.173
-19.5249
-13.2026
-12.2548
-2.56562
-9.50755
-16.547
-7.23753
-30.7213
-23.8908
-25.2237
-9.50702
-7.96245
-14.4471
-15.3251
-7.95979
-9.07102
-37.9066
-13.0138
-14.3195
-13.6579
-13.0274
-4.64865
-13.4922
-9.98998
-6.85546
-11.8627
-20.3765
-9.21747
-12.5928
-10.868
-7.8832
-7.81918
-12.6733
-13.2598
-15.4119
-10.236
-11.7073
-15.0112
-5.98673
-7.04751
-10.2765
-20.7583
