# Supplementary material for: A mechano-osmotic feedback couples cell volume to the rate of cell deformation
Source: eLife journal article supplement (doi:10.7554/elife.72381), 2022-04-13
Supplement: supp [file volume area dynamic spreading 0.xlsx]

## Sheet: control volume
t	1	1	1	1	1	2	2	2	2	2	2	2	2	3	3	3	4	4	4	7	7	7	7	8	8	8	8	8	8	9	9	10	10	10	1	1	1	2	2	2	2	2	2	2	2	2	3	3	3
	2	3	5	6	7	8	9	11	12	13	14	15	16	17	18	19	20	21	22	23	24	25	26	27	28	29	30	31	32	33	34	35	36	37	38	39	40	41	42	43	44	45	46	47	48	49	50	51	52
0	100	100	100	100	100	100	100	100	100	100	100	100	100	100	100	100	100	100	100	100	100	100	100	100	100	100	100	100	100	100	100	100	100	100	100	100	100	100	100	100	100	100	100	100	100	100	100	100	100
1	100.345	101.492	99.1056	101.465	102.133	100.156	99.864	100.956	101.677	101.94	100.876	101.396	99.5538	101.58	101.728	100.502	100.508	100.106	101.322	102.211	101.396	101.681	100.455	102.223	99.5215	101.195	100.432	101.084	100.026	101.673	99.545	101.913	101.241	101.487	97.6351	101.013	101.728	101.161	100.02	102.8	98.2639	100.918	101.445	99.7928	99.9467	101.888	100.988	102.399	100.367
2	100.423	101.859	99.8389	102.759	103.29	99.8541	98.5103	101.145	102.789	102.574	100.777	100.853	100.093	104.725	103.641	101.435	100.94	100.33	102.763	104.485	102.363	103.359	102.016	101.592	98.3088	102.567	100.925	101.803	101.54	102.502	99.8188	103.378	101.315	102.739	94.2633	100.249	103.909	100.335	100.962	105.816	97.0209	101.107	101.976	100.257	101.339	103.927	100.261	106.078	100.506
3	100.288	102.991	98.2936	102.458	104.797	100.229	97.5903	101.904	103	103.65	101.008	100.275	100.629	104.731	106.451	100.851	100.814	100.025	102.739	107.151	102.631	104.701	103.141	102.492	97.0418	102.875	100.896	102.095	101.476	103.639	99.8739	103.338	101.715	105.586	93.6916	101.474	103.346	98.0565	100.912	107.469	96.3061	101.874	102.133	100.726	102.798	104.187	100.311	105.301	100.682
4	100.476	103.816	97.0157	103.617	105.289	99.6254	97.7841	102.667	104.437	102.463	101.975	100.867	102.726	105.771	105.743	101.777	100.967	100.65	103.104	108.001	102.277	105.769	103.7	102.363	97.2981	102.122	101.28	103.458	102.485	104.252	99.4682	103.47	102.114	105.808	92.8759	101.326	104.993	98.9769	98.8465	107.876	93.5922	102.355	102.502	101.452	102.972	105.349	99.5927	101.883	101.684
5	100.416	104.27	97.4601	105.14	104.911	99.6461	96.54	104.099	104.995	99.2834	101.868	100.308	103.368	104.448	106.506	101.756	102.277	100.647	102.583	108.712	102.588	106.136	104.309	103.439	96.3684	103.438	101.089	103.299	101.912	103.848	99.7594	103.362	101.292	106.775	92.2804	99.1282	104.785	101.048	98.852	104.32	92.2552	103.225	101.955	101.757	103.888	108.016	97.7284	95.7761	101.107
6	100.352	104.874	98.1862	105.119	104.579	99.6204	93.4986	105.258	104.869	97.7091	102.841	98.9413	104.643	102.916	109.046	102.471	102.123	99.19	102.393	108.932	103.196	105.807	106.588	103.796	93.891	103.829	101.085	103.487	102.544	102.862	100.715	104.482	101.778	107.027	91.3442	98.9062	105.75	101.601	96.6869	103.949	90.847	103.84	101.517	101.789	103.823	106.402	95.5481	94.0379	99.7411
7	99.9418	104.33	97.4909	105.512	103.84	99.0356	91.5515	105.636	105.575	96.0889	104.651	99.0523	104.495	102.114	108.012	103.077	100.877	98.8167	103.077	109.785	102.66	106.279	107.767	103.277	93.945	104.074	100.807	103.246	102.372	101.366	101.642	105.046	101.577	105.089	89.6906	97.2551	105.486	102.888	95.9454	105.16	89.8294	103.748	101.732	101.563	103.391	106.345	92.9965	93.4749	97.1786
8	100.018	103.122	96.7196	106.166	101.016	99.2652	89.7359	105.69	102.154	96.0611	105.302	98.423	104.416	101.843	106.084	103.4	98.5152	99.1108	103.532	108.937	103.035	106.597	108.238	101.83	92.6307	103.539	99.6868	102.053	100.114	98.4552	101.089	105.913	101.823	104.492	88.0916	97.04	104.746	103.85	96.5334	105.062	89.7239	101.988	103.09	101.664	103.56	104.405	91.4313	94.6511	95.7089
9	100.424	102.805	97.2459	107.555	98.6374	99.5671	88.7331	103.761	100.233	97.5925	106.353	97.552	103.321	100.514	105.762	103.608	96.5	98.8886	104.415	106.342	102.602	106.013	106.541	100.669	89.7955	103.257	99.3748	101.013	100.828	95.1356	99.8311	106.024	100.282	101.426	87.2563	96.1426	103.683	105.5	98.2255	102.157	89.9812	101.471	102.782	100.314	104.538	104.576	90.0837	95.9787	94.813
10	100.276	103.054	97.4711	106.4	96.982	98.8461	88.0478	104.712	99.8979	98.1016	104.292	96.9123	104.532	99.807	107.11	104.287	93.2785	99.3392	105.229	104.263	102.769	105.123	104.896	101.217	90.1847	102.237	99.4958	99.2379	101.143	93.4071	99.1718	104.873	100.763	102.779	87.2176	96.915	100.353	106.344	97.6416	103.206	88.9795	101.056	101.814	99.0901	102.719	102.731	89.1094	95.6101	95.3606
11	100.858	104.503	97.9178	107.923	95.673	97.0095	86.9681	105.596	99.5277	95.3369	101.278	97.3276	103.474	97.9504	106.183	104.728	91.264	98.8666	104.685	103.489	103.446	104.375	103.403	99.3446	88.7021	101.563	99.3933	97.7451	101.376	91.7696	98.8671	103.985	100.312	101.545	87.2847	96.2787	101.021	105.779	96.5697	101.953	89.4489	101.745	103.089	98.9656	105.196	101.05	90.0215	97.0617	94.8623
12	100.948	104.219	98.0034	106.359	94.128	97.2268	86.0275	104.347	99.061	95.2915	100.849	96.8117	103.436	96.5238	104.388	105.247	90.0788	98.7821	103.328	103.395	103.146	105.182	101.779	96.5054	88.5689	100.445	98.975	97.2506	100.305	90.6588	99.0806	102.989	100.775	100.339	87.6418	98.1675	100.389	106.53	96.7522	101.009	88.8786	102.081	101.799	97.3837	104.277	100.803	90.3312	96.694	95.4078
13	100.677	104.171	98.8184	108.487	93.9898	97.287	85.122	102.98	98.4325	96.1445	101.15	96.2891	102.922	96.5914	103.706	105.373	88.9338	98.8867	101.065	103.906	103.625	104.063	101.225	96.2099	87.1824	99.9083	98.0696	96.2867	99.5349	90.7134	98.6192	101.67	101.299	98.9428	87.6135	97.9183	99.16	110.015	97.6589	101.085	88.6251	101.232	102.81	96.9261	105.518	98.4341	90.7821	98.506	95.0865
14	98.7794	103.502	100.065	109.304	93.5445	96.7398	84.8435	103.732	98.0991	94.7893	99.7507	96.1721	104.561	94.7309	103.101	104.386	88.5032	99.9892	99.0457	104.115	103.533	104.345	99.9231	94.7313	87.0647	99.4982	97.656	96.5601	97.0207	90.8572	97.8232	100.267	101.428	97.1414	87.2817	97.4764	98.641	111.223	95.8608	100.547	89.2401	101.483	102.069	96.6183	103.593	96.4361	90.8645	97.5532	95.4689
15	93.8377	102.581	100.597	107.728	92.9616	96.9072	83.6125	104.563	96.6689	95.8736	97.7506	96.4622	105.668	93.3009	102.011	103.958	88.5965	100.076	96.3507	104.044	103.274	103.883	99.5338	95.8183	86.8039	98.1219	96.5806	95.9034	95.1436	90.2435	97.7648	99.1801	102.322	95.4256	88.0127	96.991	99.6926	109.553	96.3468	99.3708	90.6155	101.581	99.4062	96.1362	103.754	95.0227	92.9481	98.1202	94.8768
16	88.1575	103.37	101.129	105.822	92.7977	100.225	83.335	104.711	96.5452	94.9688	96.4588	96.6622	105.551	93.1748	100.489	104.476	88.3049	100.069	93.6167	104.392	103.246	103.417	99.1349	95.6788	86.0955	98.634	95.5262	95.6299	95.2633	89.737	97.7915	98.0495	102.036	95.8332	88.1125	98.4945	98.1983	108.468	94.9252	99.2863	89.6429	101.386	98.5485	95.9381	103.029	95.5407	92.7539	100.388	94.5481
17	85.6742	102.408	102.012	106.071	93.3932	100.879	83.2755	104.416	97.1679	92.1771	95.1284	96.2295	103.554	93.3005	98.9749	103.999	88.3902	99.8171	92.364	104.662	103.621	103.185	98.1734	95.0578	85.5745	97.959	94.7485	95.4797	94.8957	89.5043	97.641	96.9586	103.425	96.1376	86.4366	97.8122	98.163	112.942	93.5421	97.1234	88.5392	100.722	97.7116	96.0413	103.342	94.5674	92.3722	100.017	94.411
18	84.1571	101.425	101.722	107.946	93.0159	100.579	82.7704	104.076	97.1237	93.6124	92.9625	95.8378	102.648	93.2878	98.1088	104.46	87.4883	100.035	91.7422	104.996	103.963	103.388	96.6452	94.859	86.2371	98.3397	93.2859	95.3731	94.8058	89.6861	95.6409	95.9928	103.495	93.9057	85.8808	98.8152	97.9319	112.949	92.6684	95.919	89.1101	100.064	97.6078	96.2439	103.818	94.3535	91.8494	99.6547	93.7323
19	83.5166	100.791	98.3453	106.565	93.402	102.119	80.5312	104.973	95.1893	93.9925	92.4781	94.9665	104.66	92.0926	98.4667	103.409	87.5357	99.9283	91.2955	104.489	103.884	102.875	97.3788	93.6279	84.484	97.1924	92.195	96.5435	95.0345	89.455	95.9921	95.2627	103.969	91.6783	85.6655	99.2358	95.9351	113.301	92.0326	95.3354	89.9021	100.218	97.0951	96.323	102.729	94.189	91.0593	98.379	93.5211
20	83.2143	101.468	96.3484	107.444	93.5279	102.08	79.9207	104.899	94.6941	93.0464	91.2219	95.267	104.888	90.7355	97.6814	104.197	87.7545	99.6963	91.2312	104.27	104.4	102.117	96.6129	92.2755	85.4007	97.2363	91.4585	96.7877	96.3653	88.7008	96.5596	95.0947	105.758	90.8421	85.4024	98.9195	96.1694	113.091	91.0655	94.8306	90.0926	99.5269	96.6786	96.5568	102.199	94.4315	91.0062	98.2732	92.17
21	82.549	100.017	94.9868	107.168	92.9568	98.6339	79.7977	105.426	95.1618	93.3523	91.1484	94.7021	104.588	91.3695	95.94	104.478	87.267	99.2933	90.9208	103.522	104.07	101.938	96.2728	91.0425	85.9159	97.6166	90.4469	96.309	94.06	88.4587	95.8486	94.5615	106.267	91.0901	84.6027	99.2632	95.5552	111.751	90.1536	93.4552	91.2387	99.4452	95.1704	96.2107	102.357	94.3222	91.7333	93.7855	92.2752
22	82.0099	99.1777	92.1801	107.213	92.1993	99.1444	79.4761	104.567	94.5442	92.5562	89.4917	94.09	103.473	91.3528	95.0597	104.317	86.6427	99.1841	91.7028	102.951	103.335	101.883	96.8231	89.7257	86.2087	96.1852	89.6861	96.7856	94.2483	88.7271	94.7022	93.7088	105.912	89.7146	85.0547	101.485	94.8118	111.56	89.886	92.8606	90.7901	99.7505	94.8614	96.1653	102.046	95.1372	92.3142	93.3477	90.3632
23	81.8702	98.5478	90.1901	104.575	91.2474	98.7026	79.8015	103.771	94.8693	91.9147	89.2083	93.2073	101.056	91.4002	94.4253	103.687	86.3289	98.8362	91.4297	102.889	103.658	101.452	96.4116	89.6448	86.8743	96.4836	88.4346	96.8783	94.4056	88.8852	94.1183	93.5647	106.777	90.2592	84.5537	101.696	92.9262	112.153	90.2475	92.3322	91.1537	98.6984	94.5789	95.957	99.9722	94.9155	92.5438	93.42	90.0892
24	81.5554	99.3347	89.3662	106.097	91.661	97.8826	80.0437	102.682	95.4906	91.6772	88.0448	92.4843	101.274	90.7356	93.1258	103.975	86.4217	98.2286	91.8979	102.601	104.015	101.287	97.4624	88.4383	86.9388	96.8449	87.293	96.8081	92.8764	88.9388	93.087	92.5839	105.902	90.3584	83.7976	100.233	91.6132	110.181	90.1865	92.403	91.8044	98.4385	94.3285	95.8509	99.3479	94.4477	92.656	92.8591	89.8555
25	81.4335	98.5588	88.6537	104.035	91.4792	97.1173	80.1226	102.355	96.4029	90.5459	87.549	92.419	100.876	90.2371	93.0332	104.114	86.6417	98.1179	91.8174	102.679	104.288	100.678	96.7746	88.1554	86.48	96.2726	86.3256	96.9992	92.5697	89.2964	92.8586	91.8289	107.778	89.5244	83.4356	101.034	91.073	108.584	89.2086	92.7955	92.3356	98.0633	94.4649	96.259	98.8766	94.5685	92.8875	95.3294	89.5819
26	81.5944	98.898	89.3047	102.727	90.939	97.5382	80.7474	102.226	95.7155	90.794	87.3001	92.3337	99.9577	90.5341	93.2104	103.593	86.2437	98.4346	92.0353	101.947	104.02	100.69	96.3248	88.2141	87.103	96.8038	86.0257	97.3092	93.3275	88.5062	93.1084	91.8617	108.859	88.8727	83.8025	101.895	90.0696	107.413	89.4309	91.7505	91.7963	97.7609	92.9841	96.2561	99.4415	93.8103	93.8452	93.9064	88.8634
27	82.1885	98.5947	90.1177	102.712	90.3938	96.6805	80.0229	102.228	95.3324	90.0401	87.1509	91.8849	99.6089	89.9181	92.7296	104.302	86.7762	98.2869	92.7102	102.021	104.457	101.09	97.1148	88.3683	85.9062	95.6438	85.551	97.0432	93.117	88.986	92.2859	91.9218	108.344	89.3965	82.9018	100.838	89.0478	107.021	88.7976	91.7423	92.7004	98.1704	92.9299	96.9413	98.1523	94.2365	94.1641	94.1769	88.8236
28	82.5912	97.765	92.3148	103.278	90.2602	95.8725	79.6467	101.512	95.7818	89.6078	86.2578	91.0689	98.6128	90.5525	92.5168	103.885	86.5822	98.3051	92.8112	101.835	104.442	101.525	97.0258	88.0918	85.7901	95.153	84.7441	97.1004	93.3773	88.2164	91.4137	91.8147	108.371	88.7595	83.0785	100.398	88.2053	105.632	89.6746	91.0357	93.1644	97.132	91.7507	97.2846	97.0891	94.4075	93.0267	93.2315	88.3073
29	81.8254	96.927	93.5957	103.271	89.7432	95.3405	79.7748	102.041	96.0076	89.1325	86.1308	90.3946	101.288	90.6539	93.2466	103.559	86.7768	97.6856	92.421	101.687	104.626	101.549	97.8904	88.1721	86.9611	96.2802	84.3869	97.5803	91.2033	88.3371	90.9275	91.3353	106.275	87.6905	82.6191	100.938	88.4205	104.016	86.4225	91.2833	93.6888	96.8734	92.2077	96.3748	96.0847	94.1043	92.5866	91.4051	88.3558
30	81.726	97.5557	94.8841	102.329	90.3633	94.0652	80.1383	101.13	95.5391	89.1334	87.0801	90.5366	100.111	90.3744	94.1032	104.04	86.595	97.4487	91.8002	101.371	104.318	101.936	97.7115	88.3684	86.5414	97.0556	84.4705	98.2892	91.1167	88.543	90.6381	91.062	106.302	89.5098	82.8446	100.491	87.236	102.513	85.008	91.8636	92.9353	96.2523	92.4796	96.7022	94.3459	94.038	92.9319	93.2626	88.5943
31	81.0958	96.9067	93.7723	100.831	90.074	93.8929	79.8653	101.11	95.0424	88.6461	86.2416	90.1829	99.9427	89.8423	93.4731	103.026	86.5677	97.7352	92.5505	100.822	103.936	102.15	97.7337	88.5907	86.1757	97.0019	84.4022	97.5986	91.1721	88.4401	90.7526	91.4174	107.275	89.388	82.0352	100.925	87.9014	101.841	85.5577	90.6238	91.9001	95.8467	92.8064	96.9041	94.8381	93.9028	93.0725	92.4748	88.1833
32	80.6356	97.0456	93.2825	99.0975	89.5716	93.6626	79.8608	101.227	95.5284	88.4951	86.4855	89.1842	99.9879	90.4196	93.3019	103.802	86.8739	97.3913	92.3894	100.746	104.149	102.936	97.4434	87.709	86.2458	97.8434	84.1519	97.6378	91.014	87.8889	90.8476	91.8025	106.731	89.6997	80.9735	98.8886	87.7797	101.398	85.5175	91.2851	92.3411	94.9492	92.7295	96.4992	93.9558	94.0773		93.0625	87.8351
33	80.1502	96.6871	93.2517	99.6621	89.1265	92.6496	79.6673	100.801	95.1858	89.0082	86.0138	88.6183	101.284	90.0609	92.723	103.152	86.7289	96.3769	91.7555	100.603	103.672	103.149	98.3515	88.0423	86.1791	97.427	83.4512	97.809	91.4556	88.6421	90.1114	91.9737	106.666	89.6609	80.2776	98.7351	86.562	100.71	85.7592	90.257	92.8652	95.1377	91.8899	96.3697	94.2445	93.2727		91.9293	87.8085
34	80.0235	95.629	92.971	98.5594	89.5975	93.4057	79.5528	100.989	96.4408	89.0485	85.8281	88.7264	101.962	90.4904	92.4908	102.909	86.6452	95.0409	91.5891	100.207	103.203	102.548	99.0828	88.0208	87.6467	96.2507	83.7485	98.4141	92.0532	88.5994	90.5737	92.1817	105.632	90.1484	80.5616	100.938	87.0715	99.5216	87.5628	90.2353	93.4225	95.4669	93.2419	95.9065	94.8003	93.9888		93.489	87.9317
35	80.2405	95.1945	93.5249	98.2833	88.5909	93.0622	79.4999	100.272	97.1531	88.8862	85.8219	87.3564	100.885	90.0741	92.4901	98.9371	86.7295	94.5284	91.6349	100.492	103.009	101.986	99.4357	87.6708	86.6932	95.9434	83.8312	98.4121	92.339	88.8107	90.8117	92.8726	104.354	84.1603	80.6779	102.2	86.7257	99.597	88.0566	90.2527	91.3839	94.7526	92.751	96.3453	94.9747	94.5785		94.9423	87.583
36	79.9756	94.229	93.7669	100.386	89.24	93.0112	77.0253	99.5942	97.0634	89.0365	86.0556	87.1413	100.686	89.8403	92.377	94.4557	86.3277	93.2538	91.4097	100.896	102.587	102.091	99.024	88.2749	86.594	97.2912	83.8648	98.0174	92.2756	88.3696	91.2812	93.0366	104.155	83.9477	80.4236	102.698	86.4669	100.273	88.7323	90.9882	91.9391	94.6785	92.0398	95.9917	95.4836	94.737		93.1134	87.781
37	80.1694	94.9516	92.8018	98.4366	88.7534	92.6793	77.2663	99.2528	96.5726	88.9782	86.2097	86.8765	101.683	91.4623	92.5594	91.516	87.0616	92.9588	91.3405	101.544	102.107	101.871	97.7315	88.3296	85.9874	96.6428	83.5176	98.4279	94.0542	87.5846	92.3026	93.4847	103.011	86.3459	79.7939	103.652	84.2001	99.5059	88.0477	90.7577	90.5854	95.198	91.687	95.8413	95.9679	95.4131		93.772	86.7738
38	79.378	94.5875	91.6869	97.214	88.8745	91.3247	76.7788	98.7651	96.3449	89.5501	86.2137	85.3619	101.308	92.1338	92.9541	90.6643	87.6299	93.1645	90.8349	101.221	101.405	101.707	97.8051	86.9004	87.3012	96.1513	83.6304	98.8997	93.2368	87.0965	92.3239	92.9283	102.203	84.5485	79.8015	98.2717	85.2031	99.3209	88.8132	89.8938	90.6635	94.679	91.0128	95.9785	94.8938	94.8129		94.6858	87.5714
39	79.9281	94.6747	91.9705	97.057	88.0069	90.0639	76.7575	98.5342	96.4176	89.5465	85.2783	86.5205	101.18	89.6023	92.2444	89.8249	87.3721	92.9661	90.435	102.168	100.788	101.542	97.9243	87.5793	87.1082	95.6193	83.7302	98.319	93.6343	86.6161	92.4517	92.9639	101.195	84.7461	79.9179	100.91	84.9098	99.2917	88.7797	86.83	90.283	94.8833	90.8975	95.2754	95.8782	95.1968		95.0364	87.9022
40	79.4972	94.3502	92.2323	97.0126	87.9753	89.7529	77.1068	98.1234	96.2794	89.6002	85.7804	86.2706	101.527	90.6034	92.2771	88.9772	87.2259	92.7917	90.0265	102.07	99.9922	100.679	97.6727	87.0021	88.8213	96.2522	83.6702	98.7415	94.0976	86.8388	92.5038	93.103	99.3655	84.1329	79.3416	99.7235	84.3246	99.9343	88.6599	87.7223	90.2562	95.1483	90.8993	95.3525	96.015	95.7273		95.5055	87.1278
41	79.7755	94.607	91.2589	97.0049		90.4423	76.8267	97.9307	97.6837	89.246	85.9379	86.9816	101.86	89.447	92.2327	88.752	87.4101	92.0796	90.345	102.195	99.8512	100.616	97.9288	87.5458	89.2062	95.0099	82.6551	98.6936	94.8651	87.0461	92.9434	93.6328	98.5239	85.5699	79.0923	98.978	84.2289	99.6668	88.3366	86.9072	91.027	94.9364	90.0259	95.6142	95.4539	95.6513		94.2653	87.5386
42	79.4948	94.0698	91.3901	94.9388		90.429	76.9368	97.7686	97.2212	88.4347	85.8403	86.0845	102.098	89.9463	93.1477	89.1547	87.6709	91.8363	89.7435	102.285	99.227	100.51	97.903	86.6349	89.3496	95.394	83.2358	99.3982	95.0605	86.7727	92.8636	93.7479	97.6168	84.9678	78.7823	98.2416	83.2572	99.2144	87.6676	87.4332	92.012	93.9964	89.7742	94.9202	95.3305	96.125		94.0784	86.6763
43	78.7715	94.4825	91.3191	95.9659		89.4029	76.5208	97.5894	97.2062	87.6308	85.4888	85.812	102.64	90.1214	93.2113	88.478	87.5625	91.7435	89.6838	101.512	98.7645	101.007	97.535	87.3775	87.7464	94.836	82.9131	98.8064	94.6064	85.5757	92.3768	94.1602	97.3948	84.715	79.4258	97.0316	84.6476	99.8649	87.6213	87.4465	91.9156	93.8381	89.9333	95.0195	94.9818	95.6739			86.5026
44	78.6909	94.1245	90.6883	94.8743		89.8476	76.2274	97.5415	97.0705	86.5329	85.4714	84.9397		89.5665	93.2438	89.3291	87.3661	92.1025	89.6569	101.093	97.3606	101.08	97.9648	86.7162	89.9092	95.3768	82.7234	99.2164	94.9562	86.27	92.7347	93.6983	97.102	86.2608	79.1842	95.7179	84.9956	100.627	87.2404	87.4973	92.3415	93.8711	89.7978	95.0361	95.312	95.3579			87.4524
45	78.1591	94.4807	90.2352	94.5907		89.0095	76.5311	97.278	97.1671	87.4909	85.3514	84.8113		92.2901	93.0019	88.9544	87.6229	91.8933	89.2537	101.218	96.4269	100.068	97.6608	86.5222	88.9994	94.0513	82.7467	99.3354	94.4744	85.9205	93.3285	93.6299	97.2012	90.5898	79.3996	93.8055	85.209	99.5911	86.8823	88.1903	92.926	93.5897	90.1251	95.4526	96.2063	95.4972			87.4247
46	77.9745	94.811	90.1381	95.5622		88.9669	77.1908	96.9029	96.9596	87.2759	84.912	85.1572			92.9685	88.6043	87.7019	92.3539	89.2602	101.158	95.5983	99.3665	97.4408	87.1157	90.2524	93.1496	82.7213	99.4713	94.8716	85.5943	92.8172	94.119	97.2618	86.8906	79.561	94.2785	84.3816	99.3108	88.7162	87.7254	93.6929	94.0916	90.6761	95.6499	96.4424	96.1622			87.8868
47	77.1141	94.6963	89.968	96.1446		89.2229	76.848	96.1433	95.8858	87.9013	84.5199	84.8187			93.2192	88.8854	86.9585	92.1096	89.3819	101.137	94.6408	99.0222	97.1944	87.6556	89.5453	92.8788	82.9803	99.1523	95.3278	86.2517	93.4019	94.4798	96.8613	90.1394	79.2949	92.1693	83.9081	100.198	87.5292	86.8285	93.6438	94.4758	89.8172	95.8839	97.2652	96.4807			86.8888
48	77.3788	94.1374	88.901	95.8727		88.8904	77.7459	95.6335	95.6337	87.6323	84.7114	82.9611			92.9463	89.0887	87.252	91.4555	89.7832	101.023	94.4255	98.1816	97.516	87.8433	88.8532	92.2108	82.9902	99.2528	96.2858	86.8066	94.2762	93.8018	96.7932	90.9307	79.7154	92.9439	83.4	100.307	89.6517	87.367	93.2298	97.1438	90.4714	95.1072	98.0324	96.3741			87.4475
49	76.6743	93.7042	89.5575	96.0741		88.5755	78.1646	95.9314	95.6983	87.5238	84.1234				93.1765	88.7283	87.0455	91.7344	89.5696	100.963	94.411	98.2576	97.3217	86.6961	89.9618	92.4223	83.4619	99.4073	95.9038	86.2738	93.6192	94.1323	95.5388	87.3071	79.1504	91.253	84.3554		89.3314	87.4829	93.7646	97.678	90.0918	96.0436	97.848	95.4134			86.815
50	76.8509	93.309	89.0472	95.3113		88.7747	76.3731	95.7107	94.7063	87.19	84.793				93.7376	89.8842	86.6957	91.9187	88.9979	100.554	92.8831	98.2755	97.1209	87.3624	88.7482	93.0675	82.8087	100.034	96.0691	86.7878	93.7795	95.2016	97.527	92.0279	78.8235	89.9645	86.3702		89.4753	87.2257	93.7571	96.907	90.5704	97.0816	98.5483	95.3311			86.7014
51	76.6976	93.3862	89.3064	94.9042		88.1462	78.3785	95.7222	94.315	87.8104	84.7771				93.6456	89.4538	86.5368	92.0733	88.9248	100.671	93.0356	98.5598	97.6662	88.5321	89.2978	93.7207	82.7926	99.3396	96.1565	85.9069	94.4434	94.248	96.1995	92.8908	79.2544	90.19	85.7443		89.3255	87.0275	93.6206	97.3995	91.0936	95.9972	97.278	96.2947			87.5136
52	76.2045	93.3307	89.0063	95.7237		88.8984	77.6678	95.5171	94.0067	88.6125	85.0219				93.4416	89.1665	86.894	92.5386	88.1615	101.183	92.1913	98.4242	96.7765	88.203	88.2389	93.8211	82.8592	99.8578	96.9245	87.1871	94.4971	94.4699	95.8238	88.2551	79.2608	90.0292	85.8817		88.0241	87.3159	94.4444	96.8977	91.9926	95.3407	96.481	96.1954			87.3045
53	75.2009	93.5994	89.4797	95.6638		87.2082	77.4316	95.9176	94.3093	87.532	84.4918				93.7254	89.5938	86.8837	92.4756	88.3693	100.655	91.5044	97.755	97.7593	87.6959	87.4824	93.452	82.9313	99.9979	96.0467	87.6706	94.1514	94.4553	96.7919	89.5927	80.2386	89.2575	85.2869		88.6908	86.4502	93.7288	97.5054	90.3194	95.7614	96.7412	96.2924			88.372
54	75.5012	93.2918	88.7461	96.553		88.3987	77.3349	95.7003	94.6958	88.2881	84.6749				93.8475	89.793	86.8774	92.0582	88.9391	100.442	91.5227	97.8647	97.249	88.2749	89.0079	93.2431	81.9153	99.0796	96.1588	87.294	94.4653	94.6058	96.2626	91.2499	79.5841	89.5153	86.026		88.3927	86.5908	93.8161	98.0355	91.6538	95.0848	97.3138				88.8297
55	75.7092	93.3445	88.2095	96.0911		88.2369	77.1469	96.0463	94.6322	88.1419	84.5332				93.648	89.3992	86.2864	92.0138	88.374	100.856	90.758	97.7448	96.9669	87.3985	89.4169	93.4089	82.8855	99.4987	96.0938	87.4359		94.0052	96.8486	91.1142	79.0858	89.5355	86.3308		88.4969	86.4765	93.1027	97.9928	91.9702	94.5312	97.5992				88.3886
56	75.3796	93.5281	87.346	96.7867		87.9095	76.375	96.1082	94.6413	88.4619	84.0021				93.7725	89.7939	86.438	91.5254	88.1968	100.57	89.9931	98.0838		87.9318	90.6348	92.3907	82.6202			87.2208		94.8039	96.9896	95.698	79.2645		87.2911		87.4908	86.2002	92.6239	98.3967	92.6405	93.52					88.6519
57	75.0931	93.3632	86.4774	96.7116		88.4732	77.2665	96.6281	94.2008						94.0009	89.5729	86.5574	92.3077	88.3694	100.774	89.0885	97.6532		88.3903	90.3922		82.3272			87.2363		93.9553	96.8501		79.534		86.4684		87.4636	87.8093	93.5226	98.1866	91.4865	93.602					87.6215
58	75.2531	93.8707	86.4834	97.2974		89.3484	76.7846	96.0222	93.7039						94.3401	89.097	86.6214		88.5093	100.347	89.1391	97.4743		88.8648	90.4932		82.3585			86.7658		95.4047	97.5424		79.2815		86.9727		86.8341	86.1147	93.1111	97.8845	90.5374	93.7162					88.4361
59		93.8316	86.3679				77.0017		93.5571							88.2902	85.7418		87.99	100.595	88.5749	97.3565		88.9124	92.3323		82.0854			87.7178		94.195	98.0085		79.2277				87.3415	86.0684	92.8289	97.89
60		93.2242					75.8536		93.2112							89.0023	85.7787			100.384		96.6413		88.6343	91.9726		82.5854			87.7657		95.3267			79.6731				87.1216	84.8376
[truncated: 45 more columns]

## Sheet: control area
t	1	1	1	1	1	2	2	2	2	2	2	2	2	3	3	3	4	4	4	7	7	7	7	8	8	8	8	8	8	9	9	10	10	10	1	1	1	2	2	2	2	2	2	2	2	2	3	3	3
	2	3	5	6	7	8	9	11	12	13	14	15	16	17	18	19	20	21	22	23	24	25	26	27	28	29	30	31	32	33	34	35	36	37	38	39	40	41	42	43	44	45	46	47	48	49	50	51	52
0	23.193	46.491	32.346	19.345	20.385	7.696	60.844	16.745	10.713	24.129	33.178	19.553	13.001	31.202	38.586	19.137	15.497	33.49	15.497	25.898	22.049	24.545	7.176	31.722	83.309	26.418	94.438	15.185	8.529	50.443	28.082	24.233	12.377	14.977	43.891	4.68	13.937	8.737	37.962	12.585	11.649	8.633	9.153	14.665	12.481	9.985	16.953	5.2	8.633
1	37.13	68.228	43.475	34.01	38.274		87.469	30.162	22.777	40.354	49.611	26.626	29.122	51.691	54.187	27.874	43.683	43.163		33.594	42.955	82.997	19.241	46.179	103.278	33.698	123.871	19.969	20.177	109.311	39.106	74.885	22.881	19.241	60.012	12.377	29.954	25.274	80.189	24.962		9.257	18.513	31.41	20.697	23.817		21.321	27.354
2	42.123	67.916		27.874	74.885		106.19	48.571	41.082	41.602	54.187	38.794	37.754	71.972			60.74	58.764	23.713	70.516	51.171	128.136	37.13	55.747		83.725	133.232		20.489	112.535	46.387	83.725	17.681	35.362	69.476	20.489	38.17	41.915	89.341	35.674	54.187	18.721	33.074	61.468	27.042		23.713	29.122	40.978
3	50.963	65.212	56.579		91.421	18.097	229.022	69.164	61.468		70.1	43.267	42.123	72.076	63.548	45.659	84.245	84.869	32.45	100.782	79.461	129.904	48.883		124.599	100.782		43.891	29.642				21.425	49.819	79.773	13.833	59.076	44.203		42.019	65.212	32.138	28.81	91.942	28.602	72.908	46.075	59.284	83.101
4	61.78	63.756	62.716	124.183	101.51	36.61	254.815	89.653	70.1	59.18	70.62					51.171	87.677		51.379	120.335	96.414	232.974	46.387	61.26	166.306	102.342	160.17	51.587	36.818	175.043				131.88		21.633	66.252	52.107	191.476	48.259		53.771	39.834	135.832		92.15	58.764	168.802	89.653
5	69.06	72.076		142.281	123.455		271.248		94.854	128.864		61.364	72.7	168.386				108.895		152.889		277.905				123.143	194.7		42.019		81.437	135.312	20.593		176.603	26.626		70.62		52.939	31.618	58.66	43.579	146.337	49.091		74.052	221.221	307.546
6	74.052					37.65	316.387	153.305	190.227	177.435			94.854	205.204	183.467		92.15	144.569	48.779		133.856	316.699	163.498	78.733	209.781			159.754		204.684		150.601	24.962	139.056	182.219			145.089	231.726	65.004	47.427	71.66	50.547	226.838	59.18	162.874	78.733	231.622	375.983
7	87.157	190.643		145.193	278.529		399.072		236.822	184.091	220.597	153.617			213.525		232.35	173.482		310.459	148.209	376.607				189.707	239.734		61.156	244.415			40.25		214.461	29.018	157.361	156.009	270.208	72.804	38.586	101.614	38.274	275.617		184.091	239.214	246.495	465.532
8	99.222	231.622	45.867		376.607	49.299	448.371	172.546	263.552				162.978		233.702		277.177			382.119		425.178	154.969	118.047	263.864			187.003	73.532	282.897			32.97	146.961	242.023	23.089			276.033		47.219			285.705	156.009	210.301	305.986	263.76	510.879
9	106.814	230.478			477.805		490.389		288.617				199.068	268.856			319.715	242.335	65.732	479.261	165.578			140.512	311.811	224.549	270.832	245.767		335.836		205.62			272.808	28.81	172.442		268.648	101.614	51.587	115.551	157.777	338.02		204.996	321.483	279.049	592.108
10			51.691		510.567	148.417		201.252		176.915		192.1			260.536		378.999		79.149	510.047		494.966				257.311			145.401		215.085		29.746	164.33	303.49		202.812	151.953			61.676	132.816	159.65	339.684	180.763	226.006	332.612	290.905	684.673
11	107.646								362.566		245.351			325.436		52.211		418.521	93.606		208.013		199.276	209.365	368.182		328.972	306.506	155.281	458.356		254.919			319.923	25.482	235.99		315.763	171.818	45.451			375.983	189.707	232.766	327.516	280.713	754.565
12	250.967		47.739		605.108	170.05		214.565		233.598			212.901		317.531	172.65	508.383		112.951	608.957		601.884				316.907							35.882	210.717		28.602	240.67	154.449	354.661	192.62	63.444	171.402	172.026	388.983	195.324	253.567	313.475		812.601
13			41.915	135.728							332.508	215.085						491.222	252.735		199.068							342.805			265.112		39.73		366.31	43.163	257.311	157.361		210.093	60.948			418.833	200.212	296.938	334.796	316.179	823.313
14	338.956	312.123			732.1		706.618		445.459					401.048	345.509	218.933	536.256		319.715	679.265		673.44	262.824	262.304	402.296	400.424	353.725		179.099	578.171		294.546	46.179		376.191	36.922	270	183.467	369.742			185.131	188.875	446.187	200.524	322.003	333.652		820.713
15	462.62		34.01							242.127	395.848								389.191							430.586		390.231						281.857			299.434			219.349		188.043	223.925	470.108	212.901	357.99	336.564		876.461
16	612.493		46.283		795.44							236.51		470.004	392.832		665.224	502.974	462.724	763.51		721.075		364.646	468.028				217.789	715.979	333.132	342.493			422.993	35.674			424.45	261.784	138.952	304.426	216.645	520.551	210.821	372.134	357.573	340.412
17	741.149			182.739		175.875		267.504	481.029				267.296			257.727							346.965			454.403	430.586	421.329					133.44	303.49		34.842	348.109	178.579		265.84		347.901	231.414	570.682	253.775	405.416	411.969		956.129
18	808.025		163.81								528.872	249.511			499.022			668.344	537.92												427.05				466.364				476.973	296.002	132.712	382.639	242.335	598.244	237.758	429.13	438.074
19	901.838	376.815			849.003		818.321		570.89					554.457			752.381			819.257		823.001	390.543	417.273	512.543	515.663	509.423	415.401	247.743	811.249		430.066	151.017			117.631			526.688	297.666		426.114	231.622	630.174	258.56
20	996.484									283.833		271.248			527.52	284.665			613.533							522.215					488.101			375.983	520.967		380.975			312.435	144.777		262.408
21	1037.98		232.246														791.28	706.826		964.554	337.188	935.328	435.578	522.111			573.386	456.691				494.862				133.648			580.979			473.54	267.504		292.986			381.183
22	1049.63			212.797	985.251	188.043		286.433	625.806				302.242	606.356	559.45										509.943				239.11				145.921	369.742		139.056	404.272	230.686			152.577		281.441	699.338		500.27			1097.06
23	1092.17		317.635								667.616	278.009							680.513		359.238					601.468					578.587											552.169					531.16
24	1120.98				1009.9		993.156		675.313					672.504	623.101	313.267	887.589	795.648		1062.32		1042.35	483.317	565.898	552.481		654.199	477.597	247.743	938.344		583.787	153.305		560.802	134.064			544.265	386.799	151.849				362.462
25	1146.36		336.46							305.258											380.871					624.038								433.082								599.596
26	1178.39				1043.6												934.912	860.548	778.175			1082.7		597.204	607.084		747.597	503.182			643.383	658.984				138.224					164.538	601.572						447.331
27	1220.51			257.207		226.214		372.238					354.037		689.561					1140.53			475.933						248.679							134.688	539.48	301.826					372.134	836.106		592.524			1295.92
28			401.152								840.162	337.916						947.393	823.938		381.807										684.361		158.818	477.181							169.738	708.075					554.353
29		515.455			1133.36		1105.48		759.974					732.62		318.051	1031.53			1220.31		1106.84	519.199	659.192	636.83		841.827	524.192	289.761	1006.47		675.001			549.465	132.712			590.86	408.953					452.531
30										375.151					709.739											700.378					738.34			506.614
31													348.733					977.243	933.352		444.939			668.864			856.491						195.012														632.046	462.204
32	1585.47							443.899							700.482		1035.49					1156.97			686.649			557.786				789.407		513.687		144.985	577.859	318.883					428.09	906.726		676.145			1359.67
33			513.375								918.479	367.87						1091.96	1046.3		487.997										763.718		210.613								236.614	820.921
34					1162.37		1123.27							773.598		350.813	1107.15			1409.6		1168.3	477.077	773.39	663.248		941.153	603.756	333.86	1152.08		737.196			567.25	142.281			725.132	479.157					505.262
35										434.018											557.474					766.63					808.337			549.985
36																		1186.82							661.272		939.488	608.541					241.919															512.855
37	1837.48			314.931		339.268		427.05					375.671		740.941	534.488					609.997															151.121	605.628	323.563					432.77	915.463		716.603			1453.59
38			594.5								1023	427.362							1184.73		683.217										880.205		279.361								310.355	924.2
39		591.588			1252.55		1197.22		878.021					843.803		640.574	1173.19	1353.33		1553.75		1360.71			715.459		1004.18	617.069	287.057	1331.9		775.471			616.029	209.261			736.78	542.809
40										418.209																804.176							311.915	601.468
41																		1502.06			816.137							634.438			884.053					200.524
42								479.469								825.81																					606.564	355.181					468.964	920.975				505.99	1528.89
43											1194.72	464.492	360.902								859.612										1055.35		331.156									1027.89
44																842.347	1155.61					1327.43	627.99				1137.2	635.998	289.241	1426.24		893.726			623.101	213.733									589.195
45										507.55				907.351							990.556					892.686							380.247	523.151
46																910.055		1715.58
47	2244.25			372.654		431.626		546.033							821.545																						599.492						522.735	987.227					1453.28
48			730.02								1354.06	539.168							1384.84		1102.47										1002.62		425.698					337.604			372.758	1103.82
49		668.864					1348.03		969.026							976.723	1182.55			1803.47		1430.09			579.419		1207.31	679.681	272.08	1463.37		912.135			636.726	274.889				634.022
50																										1024.36							431.418
51																		1735.97
52								548.841																																			522.631	1056.6					1509.76
53											1441.53																						450.763									1052.86
54																1001.06											1234.24			1509.65	873.653
55																							638.078					659.4	284.145							297.25									613.221
56										480.405	1438.82															1000.85							414.673	566.418
57																		1872.42
58	2224.9			372.342		346.861		553.729							802.408																						619.045						561.01	986.915					1535.44
59			812.705																1602.53		1510.38												458.564								477.181	961.122
60		730.644					1415.73		1035.28							1126.49	1289.05			2018.14		1506.01			618.837		1385.36			1592.86		921.599			710.051					688.001
[truncated: 44 more columns]

## Sheet: Y27 volume
t	1	1	1	2	2	3	3	5	5	5	6	7	8	8	8	8	9	9	9	9	9	9	10	2	2	2	6	7	7	8	8	9	10	10	10	10	10	11	11	11	11	11	1.1	1.1	1.1	1.1	1.1	1.2	1.2
	1	2	3	4	5	6	7	8	9	10	11	12	13	14	15	16	17	18	19	20	21	22	23	24	25	26	27	28	29	30	31	32	33	34	35	36	37	38	39	40	41	42	43	44	45	46	47	48	49
0	100	100	100	100	100	100	100	100	100	100	100	100	100	100	100	100	100	100	100	100	100	100	100	100	100	100	100	100	100	100	100	100	100	100	100	100	100	100	100	100	100	100	100	100	100	100	100	100	100
1	100.031	100.751	100.806	98.7052	100.521	99.7515	101.091	99.9433	99.8651	100.37	98.729	100.332	100.512	101.682	99.6074	100.292	99.6132	99.6423	101.122	99.4483	98.2944	101.897	100.07	98.7794	100.14	100.342	99.8172	100.539	101.01	100.445	100.763	100.191	99.7504	100.107	100.235	99.2929	100.683	99.4494	101.217	100.405	100.616	102.261	100.021	100.826	101.524	98.9117	100.317	101.438	101.156
2	101.027	101.695	100.088	98.3933	101.449	99.2038	102.096	99.7986	100.901	99.7444	98.7687	101.144	100.325	100.731	100.547	100.126	99.1095	98.7084	102.508	100.079	98.705	101.631	100.507	98.9466	99.6714	99.5775	100.721	100.585	101.173	100.594	100.361	99.9711	99.4789	100.5	101.073	99.1058	100.173	99.3111	101.255	100.067	99.7431	102.673	100.139	102.41	100.366	99.0496	100.812	101.99	101.818
3	101.188	102.734	100.513	97.7518	101.622	99.4795	103.164	99.7761	101.352	100.003	97.9329	100.945	100.997	101.052	100.237	99.9617	97.7894	100.085	101.802	100.21	98.5618	101.043	100.336	99.2763	99.5542	100.503	100.466	101.469	101.348	100.741	101.041	99.7989	100.127	101.25	101.526	100.223	99.413	99.1888	102.138	100.38	98.994	103.101	101.557	102.829	100.438	99.9091	100.223	102.416	101.457
4	101.863	103.868	100.34	96.9748	101.93	98.8722	103.528	99.8943	101.286	99.8763	96.9558	100.638	100.217	101.046	101.341	99.7615	96.6009	100.207	101.493	99.7526	98.1011	101.181	100.603	98.7672	99.8044	99.9311	99.988	101.03	101.012	101.396	101.469	99.8115	100.757	101.482	101.767	100.028	98.9582	99.2718	103.246	100.593	98.7941	104.042	101.457	103.612	99.6522	97.9494	99.6278	103.025	101.478
5	102.24	104.472	100.558	97.3337	102.395	99.5496	104.163	100.045	100.61	101.029	96.046	98.7172	99.6255	101.253	100.927	99.2901	96.7711	99.8206	100.94	99.6188	96.7874	100.247	99.5946	98.9204	99.6404	100.206	100.323	100.835	101.575	101.442	102.571	98.9022	100.567	101.64	100.647	99.1567	98.9015	99.048	103.785	100.268	98.1851	105.147	100.402	104.111	100.171	98.2784	99.1739	103.213	101.108
6	102.622	104.946	100.636	96.9196	101.842	98.8892	103.784	99.0214	101.074	101.934	95.2728	98.686	97.3729	101.516	101.533	99.6321	96.4	100.469	99.6486	99.4829	96.1005	101.079	99.0369	98.7293	99.6826	98.6236	101.644	101.29	100.891	101.149	102.858	99.1572	101.075	100.555	101.381	98.9504	97.8913	97.6227	103.167	99.4168	98.1895	105.941	100.128	105.049	101.455	97.5793	98.51	103.072	100.593
7	102.725	106.424	100.298	97.0876	101.878	98.9696	103.436	99.1971	100.937	101.133	94.7383	97.7144	95.6847	101.03	100.975	99.4382	95.4331	101.246	99.2312	99.6712	94.8147	99.2415	99.1367	98.6185	99.7338	98.3085	100.31	100.458	100.774	101.944	103.85	99.4857	99.3362	100.049	100.729	97.3748	96.7129	96.519	102.904	100.238	97.7878	105.667	100.318	105.04	102.472	96.298	97.7779	103.073	100.502
8	103.504	106.372	99.7669	96.8519	101.93	98.6831	102.731	98.2445	100.845	101.383	93.6856	97.1623	96.027	100.843	100.493	98.4202	95.3212	100.894	98.1337	99.2824	93.87	97.917	98.3985	98.3092	97.698	98.3256	100.116	100.232	99.8964	101.177	103.868	98.8511	99.4825	100.135	101.036	97.5684	95.8741	96.2139	102.111	99.967	96.7239	105.516	99.5412	105.411	102.216	96.3092	96.7711	102.535	100.79
9	103.068	107.374	99.0171	96.8094	102.34	99.1486	102.599	97.6657	100.242	101.756	94.4428	97.02	94.9728	101.205	100.775	98.4182	95.1608	101.217	97.4958	99.1321	93.0077	98.5799	98.0297	97.4348	96.4985	98.0625	100.104	99.9084	99.4923	101.195	104.038	98.924	99.3424	98.7918	101.744	95.8913	96.2451	95.3676	101.214	98.7797	96.8916	106.021	99.1659	105.439	101.645	94.4043	96.201	102.007	100.018
10	103.531	107.796	98.1048	95.9788	102.054	99.321	101.998	97.1719	99.8673	101.891	94.315	96.0761	93.5017	100.69	99.9568	96.8539	94.4447	100.065	96.8483	98.8222	93.1919	98.5531	97.5878	98.3526	95.9719	97.3989	100.682	99.8764	99.4257	100.872	104.403	98.1733	98.7655	98.8917	100.808	95.5434	96.3081	95.0595	100.722	99.6085	95.8225	106.429	99.027	106.792	101.73	94.2128	95.3546	102.232	100.064
11	103.31	107.903	97.1216	95.0225	101.806	99.1731	102.364	97.2991	99.624	101.922	94.2213	95.8661	93.2444	100.407	100.176	96.6245	93.5902	100.463	95.8434	97.7222	92.8439	97.8487	97.2205	98.1531	95.705	96.5433	100.055	99.0551	99.4066	100.238	104.435	97.412	97.7338	97.7887	100.53	93.918	96.4631	95.9794	99.9096	99.4104	95.136	106.568	97.9899	106.537	102.547	93.6903	94.5801	101.771	100.352
12	102.888	108.853	96.9208	95.0868	102.125	98.7734	102.356	96.4377	99.5024	101.307	93.6577	95.094	92.6312	100.341	100.275	96.112	93.7414	99.9391	95.1386	97.8232	92.1777	97.4718	97.0411	98.4824	94.6965	95.4934	99.7249	98.1376	98.7691	101.57	104.835	97.3438	98.4479	96.9345	100.026	93.9729	95.8823	95.5973	100.513	98.4971	94.8901	106.428	98.3068	105.721	102.322	93.2189	94.682	101.447	99.4336
13	103.289	108.476	96.7737	94.0202	101.873	98.4671	102.052	96.5752	99.3209	101.369	94.1705	95.1624	92.0637	100.776	99.2922	95.1889	93.6892	99.5343	93.9688	97.6228	92.7404	97.359	96.3176	98.2672	94.0288	95.6136	100.386	97.6038	98.3465	101.673	104.519	97.0575	98.4252	96.3882	99.5711	93.6005	94.8429	96.3681	99.1594	99.2282	93.9033	105.943	97.1861	106.088	102.294	93.6146		101.589	99.4952
14	103.205	108.028	96.4622	93.9205	101.147	97.3353	102.152	95.6318	99.2263	101.484	93.91	95.2223	92.2958	100.68	99.4398	95.0787	93.665	99.1812	94.2342	97.6764	92.4068	97.1056	96.4936	97.774	93.7589	94.3243	100.239	97.2713	97.6768	101.506	104.904	96.507	98.4048	96.6618	99.3132	92.5948	95.0329	96.346	99.1261	99.0446	93.5987	105.4	97.6717	105.694	101.908	94.1543		100.808	98.9505
15	103.024	108.25	96.4785	93.2444	101.642	96.576	101.464	96.0656	98.8658	101.223	92.9821	94.4008	92.2917	100.145	98.4135	94.4982	92.862	97.8572	93.3202	97.6099	92.3786	95.7321	96.8161	97.9953	92.1976	94.3315	100.252	96.5113	97.9332	102.43	105.201	96.3822	98.0357	96.8388	98.5733	91.8838	94.3176	96.9591	99.1688	99.0656	93.2916	104.979	97.1807	106.368	101.136	93.4597		100.881	99.0513
16	103.194	106.931	95.9423	92.6352	101.334	96.485	101.343	94.6439	99.0914	101.251	93.0738	94.281	92.2249	99.894	97.4422	94.4357	92.4985	98.487	93.9919	97.2356	91.8173	95.4043	96.5556	97.7756	92.8204	93.9575	100.237	96.1657	98.0714	102.625	104.823	95.3244	97.8546	96.7725	98.6579	91.2702	93.7429	97.0818	98.6078	98.8974	93.4053	104.933	97.0349	105.896	101.699	93.0048		100.371	98.8166
17	103.122	105.731	95.7281	92.4036	101.027	96.9331	101.069	94.8415	99.0582	100.688	93.4289	94.0753	92.204	100.016	96.6322	94.8405	91.7878	97.0397	94.0184	97.781	92.515	95.0957	96.2343	98.1487	92.7505	92.9124	102.119	95.2716	97.6194	102.208	106.566	95.292	98.2311	96.4999	99.9883	91.5008	92.3009	96.4392	98.8816	98.8449	93.7527	104.828	97.9819	105.519	100.611	92.9261		100.111	98.2234
18	103.19	105.399	94.4866	92.2497	100.656	97.1408	100.595	94.9827	98.7419	99.8911	93.2747	93.5785	91.926	99.6181	96.2361	94.4054	92.1381	97.4038	93.7265	97.1686	91.9295	93.9844	96.3495	97.551	92.6297	92.377	101.567	94.3748	97.1091	102.599	105.74	94.6884	97.403	95.9148	99.8257	90.635	92.2907	96.7339	98.7166	98.4027	92.3659	104.284	98.3687	106.473	99.6272	93.5391		99.9103	97.5738
19	103.18	104.881	94.5402	91.8454	100.281	96.2298	99.7957	94.6268	98.4249	100.261	92.0781	94.4144	91.3423	99.3801	95.7029	94	91.2283	97.3593	92.8923	97.0609	92.2364	91.8893	96.5125	97.6204	92.8749	92.5852	101.913	93.9783	97.0188	103.036	108.37	94.5034	98.4759	95.9504	100.366	90.8328	91.1249	96.4891	98.5106	98.4573	92.0637	104.23	98.1585	105.664	100.386	93.5743		99.5811	97.2346
20	103.184	103.698	94.1435	92.3806	99.5468	96.144	99.4375	94.0728	98.3307	99.8839	92.4105	94.1524	91.436	99.0184	94.8694	94.424	90.4426	96.8604	93.0844	97.4451	91.9379	90.255	96.6107	97.9949	92.1196	91.6818	100.4	93.5866	96.6442	103.188	108.179	94.5816	96.8209	95.3662	100.451	90.9238	91.014	95.7024	98.2471	98.0488	90.8152	104.6	98.5337	105.32	99.7128	93.8281		99.0986	97.4065
21	102.478	103.318	93.6537	91.969	99.3365	96.5255	97.0138	93.4301	98.7003	99.7333	92.066	93.736	91.8272	99.6033	95.3888	94.5245	90.251	96.2773	92.9774	96.95	91.318	90.2334	95.6821	97.3954	91.8085	91.0883	100.497	92.9459	97.3433	103.776	107.914	94.802	96.912	96.1335	100.885	91.234	91.7454	95.6463	97.9657	96.9951	89.5769	103.242	97.9702	104.874	99.1515	93.2869		98.9581	96.4928
22	102.656	102.569	93.9517	92.3383	99.1375	96.8886	96.3179	93.235	99.0957	100	91.6472	93.7832	92.3084	99.7668	93.8481	93.5545	90.6582	95.5796	93.1253	96.3902	90.6942	89.2271	95.6533	97.4943	91.7425	90.3547	100.092	92.2824	97.352	102.942	108.178	94.8324	96.8059	95.3324	100.643	91.8813	90.8193	94.9598	98.1892	96.7418	89.5714	103.756	98.3033	104.717	98.632	93.6236		98.7018	96.325
23	102.19	102.373	94.0037	91.8129	99.2972	96.828	96.1709	92.8269	99.8272	100.159	90.4863	94.008	91.7056	99.2208	92.8564	92.9224	89.8157	96.1549	93.1536	96.8979	90.2183	86.8365	95.0712	97.7086	92.0843	91.3891	100.082	92.4403	98.5869	102.93	108.915	94.5807	96.3532	94.6433	100.459	91.7737	90.0276	95.4701	98.4678	98.051		103.542	96.8647	103.425	98.799	94.0033		97.6456	96.1716
24	102.309	102.021	94.4693	91.4555	98.5943	96.162	96.1309	93.0653	98.9733	99.8263	90.3936	93.6861	93.362	98.5194	91.7099	93.0529	88.9679	94.9128	92.6783	96.0346	89.7362	87.2707	95.3562	96.9658	91.7215	91.8377	99.9905	92.3842	96.8026		108.548	94.1111	97.3868	95.6963	99.7891	91.9149	89.5988	94.6111	98.8721	96.5358		103.259	96.7829	103.069	98.3656	93.8246		98.1902	95.2802
25	102.096	100.647	95.0462	91.1304	98.0798	96.7086	95.1747	91.9831	99.4689	99.412	90.5496	93.9619	92.6584	98.3797	91.7357	92.0375	89.1968	94.9922	92.5781	95.6625	89.3309	85.78	94.4251	96.7211	91.211	92.3153	100.156	91.7938	96.9497		108.063	94.2396	96.3361	94.5262	99.8022	92.0564	88.9107	93.961	99.1461	97.5411		102.937	96.7045	103.032	98.7408	94.4065		98.0636	95.4626
26	101.48	99.2427	95.1423	90.8454	98.2169	96.7438	95.1843	91.5186	99.6175	99.0622	90.4966	94.6723	91.6601	98.1561	90.5026	91.2944	88.3612	96.469	92.9521	95.2584	88.9373	85.2965	93.9819	95.9097	91.4418	93.2049	101.065	91.6503	98.1131		108.372	94.0404	96.6238	95.1214	99.8784	92.764	89.1018	95.2446	98.6841	97.3187		102.773	96.3351	102.416	98.1653	92.9403		98.42	94.7725
27	101.237	101.758	95.3172	91.1493	97.2055	96.7862	94.5843	90.7112	99.7287	99.1018	90.2699	93.7246	91.6965	98.1616	90.2307	91.2369	88.5515	96.0926	91.4074	95.0689	88.6357	86.2173	93.8888	97.0233	91.4708	93.3956	100.949	90.5766	97.0804		108.174	93.8632	95.9091	94.6072	99.8016	91.5982	88.3616	94.397	99.0588	97.4293		102.614	96.0646	102.203	98.2185	93.2684		97.8616	94.2692
28	100.277	101.371	94.9311	91.1073	96.8128	97.1512	93.6493	90.7635	99.9284	98.8828	90.6201	93.6351	91.8316	97.1652	89.6403	91.4071	87.686	96.0341	91.9395	94.4844	87.7978	83.1151	93.9043	97.5157	91.1442	93.3467	101.029	90.6816	96.2563		107.967	93.2609	95.6393	93.7865	99.4779	92.349	88.2831	94.2732	98.9285	97.5556		102.878	96.3317	101.222	98.3026	93.2192		97.0122	93.9814
29	100.133	100.815	96.0116	91.0823	96.8714	97.9295	93.7532	89.8548	99.8513	98.3952	89.5914	94.2422	91.9873	97.3493	89.1291	91.2869	87.6665	97.1063	90.9496	94.8042	88.4715	83.1847	93.8686	96.5231	90.7182	93.642	100.941	90.0245	97.4211		107.938	93.4855	95.9125	94.8533	99.2525	92.174	88.3293	94.8806	99.2811	97.0731		102.469	95.7116	101.099	97.4066	93.5319		97.4375	93.7816
30	99.7139	100.896	96.9116	90.7884	96.5316	97.8476	93.3204	89.5728	98.7163	97.7331	89.7301	93.7946	92.1261	97.2188	88.5797	90.5582	86.5549	97.3579	90.9852	93.7858	88.304	83.4856	92.7526	96.7896	91.9664	93.4224	100.986	89.8051	97.0769		107.451	93.122	95.62	93.2256	99.5351	91.8766	87.888	94.5608	99.6292	95.7463		101.607	95.5985	100.912	97.8062	93.8306		97.8581	93.3829
31	99.3984	100.797	96.9129	90.0738	96.7947	97.565	92.5297	89.3876	99.4721	97.2809	89.4635	93.3995	91.7888	97.4379	88.4557	89.8174	86.537	96.6374	90.7381	93.8181	88.6495	82.7889	92.6619	96.9008	90.6303	94.3995	100.366	89.0108	96.6449		107.892	93.3281	96.0328	92.6208	98.761	92.1793	87.3905	94.5214	99.8791	95.6774		102.164	95.1275	99.6922	97.0788	94.3106		97.6949	93.5781
32	98.9406	100.943	96.2617	90.7501	96.1786	98.2771	92.7501	89.0086	99.2859	97.3113	89.7915	93.9319	92.2692	97.1273	87.7653	89.4412	86.3319	95.3086	89.5662	93.5024	89.077	81.6016	92.2366	97.1278	91.0373	93.4823	100.279	88.2153	97.0745		108.191	92.7527	96.0681	93.0664	98.3024	93.1482	87.3372	94.9082	99.746	95.9313		100.758	94.992	100.163	97.9785	93.5725		98.0385	93.0815
33	98.9318	100.773	96.725	90.928	96.0987	98.1014	92.7018	88.3085	99.4991	97.0089	90.5205	94.093	91.8523	97.2264	87.8103	88.8897	86.1163	95.3409	89.3073	93.8397	88.6389	81.8674	92.2979	97.2569	90.2615	94.9552	100.161	88.5017	95.8475		108.165	92.4528	96.2095	92.0602	98.6588	92.595	86.7379	95.3548	100.513	95.8112		101.742	94.8378	99.5239	97.9548	93.0105		97.5863	93.1069
34	98.933	100.907	97.4696	90.8318	95.7713	98.4935	92.9896	87.5884	98.7217	96.7322	91.6103	93.4696	91.8616	97.4114	86.7478	88.1818	85.0828	95.9702	89.5817	93.4619	88.9752	82.0484	91.8675	97.3701	91.4469	94.4469	101.277	88.5481	95.6221		108.877	92.494	95.7144	91.7511	98.329	93.4663	85.2022	95.6493	100.197	95.553		101.503	94.887	99.8853	96.6921	94.0319		97.0631	93.2387
35	98.2669	101.3	96.7042	90.8644	95.4201	98.1098	92.3298	87.6931	98.4313	96.8348	91.5722	92.9908	91.2213	97.8202	86.0733	87.2447	84.3928	94.869	89.2105	93.52	88.7543	82.2514	92.031	96.577	90.934	95.4286	100.934	89.3058	94.4705		108.22	92.2604	96.2751	91.648	98.4764	92.264	85.8818	95.4933	100.254	95.9002		100.831	94.1101		96.0926	93.5203		97.654	92.5997
36	98.0871	101.657	95.8411	90.3979	94.9459	97.7802	92.3598	86.9887	98.303	96.2994	91.0454	94.2108	91.3377	97.588	84.7382	86.7585	84.8678	94.5	88.8286	93.6599	88.9868	81.3238	91.0887	96.1356	90.0465	94.9404	101.297	88.2208	95.3858		107.982	92.2679	95.5388	91.9428	98.6106	92.3586	84.4928	95.3094	100.897	95.1427		101.455	94.1691		95.1632	93.1711		97.0419	92.4896
37	97.6825	103.945	96.7047	90.9009	94.7938	97.6135	92.3715	86.2523	98.4755	96.4121	89.3078	93.8696	90.417	95.2814	83.6645	87.1594	84.5324	95.2981	87.7728	92.7584	88.2263	76.8149	91.0467	95.2897	91.1325	96.3926	100.736	88.7018	95.7633		108.39	91.798	96.6307	92.1222	98.2031	92.7927	83.8234	95.1348	100.332	95.8464		101.199	93.9964		95.6941	92.5796		97.638	92.5175
38	97.2577	105.238	96.2426	90.5871	94.4408	98.7796	92.4237	83.7716	99.4297	95.9287	90.1414	93.6599	90.7885	96.8837	82.0744	87.1073	83.4841	94.8961	87.8358	93.0441	88.5736	78.1394	90.3479	94.432	90.9635	96.1806	101.783	88.5386	94.5791		108.568	91.7101	95.6479	92.666		93.4435	83.416	95.1613	101.185	95.4841		101.379	94.8927		95.284	96.0813		96.6305	91.6451
39	97.8927	104.573	95.6752	88.7567	92.9709	98.3568	92.1596	83.3927	98.6362	95.6382	89.8441	92.771	91.3864	96.8898	82.2694	87.1134	83.0529	95.3107	87.5958	92.7376	88.4045	76.7463	90.2751	93.3732	91.7044	96.6525	100.247	89.4697	94.5586		108.237	91.8009	95.5823	92.7633		92.6017	79.0598	95.1472	101.13	94.7822		101.376	94.6545		94.7902	96.2393		96.9201	91.767
40	97.2022	104.977	94.8386	88.7582	92.7502	98.4563	92.2067	83.3223	98.8536	95.9069	89.5768	93.4047	91.2423	97.1371	81.1673	86.9224	82.8253	94.2372	87.3566	91.8363	88.2805	76.804	89.4546	94.0903	92.1004	96.4511	100.475	89.3305	94.379		108.007	91.3167	95.0028	93.2275			78.7472	93.8739	101.905	95.1544		100.725	93.2086		95.2805	95.519		96.6065	92.2725
41		106.138	95.1214	88.6978	92.1974	98.3366	91.0616	82.9389	98.1022	96.5406	90.3202	93.448	90.7524	97.105	80.4709	86.9524	82.0798	95.2866	86.7515	91.7128	88.1269	77.5148	89.03	93.3285	91.8592	96.9945	100.045	90.0673	93.8879		107.766	91.5018	94.6439	93.664			78.1313	94.7413	101.773	96.8351		99.9422	93.2155		94.8615	97.0208		96.6221	91.7275
42		106.547	94.0426	88.4314	91.8311	98.3614	90.7544	82.2863	97.939	95.6573	89.5355	94.2585	90.6289	96.4612	80.4067	86.842	81.0477	96.295	86.6822	91.1211	87.486	77.1014	88.7024	93.5747	90.3672	97.5599	101.055	89.8965	94.6336		108.3	91.2491	94.5747	93.5854			76.7479	93.9699	101.295	96.314		100.462	92.594		94.413	97.435		95.5927	91.2767
43		105.319	93.9496	88.1073	91.1305	98.2103	91.2596	81.8394	97.3412	95.4846	89.3303	94.5524	91.1091	96.5559	78.6068	86.4018	80.9899	96.3243	86.4441	91.4328	87.8341	75.6702	88.4693	94.4186		96.7148	101.183	89.7019	94.8099				94.3611	92.9951			75.9316	93.4368	100.536	95.8075		100.357	91.9395		93.6721	96.6315		95.3823	91.6955
44		105.644	94.6101	87.7807	91.6795	98.2798	90.5255	81.339	97.8847	95.4413	89.9884	94.1719	90.8802	96.2675	78.784	86.1574	81.2863	95.8297	87.1074	90.9402	87.3841	75.0911	87.8114			97.5331	102.302	89.2764	93.9799				95.0189	93.0124			75.3327	93.209	100.758	97.3249		99.9153	91.5198		94.2554	97.143		94.8831	91.3056
45		104.337	94.338	87.5182	91.3934	99.0413	89.7162	81.1808	97.1071	95.6997	90.3388	93.261	90.5171	96.1873	77.7527	85.9265	80.7467	96.8884	86.5389	90.4665	87.7354	75.2087	87.6099				101.912		92.9406				94.4088	92.5703			75.3034	92.5528	101.235	96.9862		100.293	91.7301		93.7312	96.4811		94.5777	91.0752
46		103.456	93.94	86.8771	90.6577	98.9898	90.2188	80.566	98.4727	95.3192	91.276	94.0518	91.0991	96.2101	77.4117	86.0065	79.9139	97.0712	86.3854	90.2764	87.8143	74.6068	87.7976				101.633		93.8641				94.893	92.5275			75.1208	92.7681	102.256	97.8383		100.481	92.0026		93.7634	97.0668		94.8737	91.5313
47		104.521	93.7975	86.5009	90.8887	98.5576	89.3496	80.3227	98.2537	95.2834	90.0317	93.8081	90.324	95.6283	76.6874	85.2451	79.2503	96.7478	85.8675	89.7757	87.01	73.317	87.6703				101.51						94.4327	93.2264			75.1952	92.541	102.255	98.0127		99.6644	92.0203		93.3789	96.5292		94.5602	91.7358
48		105.471	93.8879	85.8345	89.9314	98.8555	89.3204	80.6593	98.4815	95.574	90.3704	94.0805	90.5304	95.3687	75.1981	84.6509	79.6555		85.9335	88.9848	87.4046	73.8606	88.0695										94.3898				74.2948	92.3465	101.959	100.843		99.3162	91.5533		93.5083	97.0475		93.8956	89.9003
49		103.434		85.6869	89.3342	99.386	88.9405	80.7156	98.5555	95.584	89.8791	94.0869	90.5941	95.545	75.3694		79.0416		86.1168	88.8736	87.427	73.0881	87.1915										93.4865				73.7733	93.0654	102.334	99.4801		99.4359	92.1536		92.9161	96.1606		94.6064	90.2987
50		102.805		85.52	89.3549	99.0875	89.771	80.1621	98.0236	95.6015	89.7593	94.0089	90.136	95.114	74.2074		79.1528		85.6709	88.4272	87.0035	75.2652	87.4291										94.7355				73.6128		102.897			99.4263	91.9686		92.7417	95.8725		94.062	90.6486
51				85.3047	89.4323	99.3464	89.0965	79.6468	97.7227	96.1307	90.2123	94.0494	90.4027	94.8174	74.9376		78.6875		85.9286	88.72	86.6739	75.7594	87.4083										94.542				73.3519		102.748				92.8496		91.9399	96.268		93.7148	90.0016
52				84.2678	89.6185	98.8864	88.9076	79.7973	97.1906	96.0077	89.3196	94.3066	90.1188	94.1979	73.6379		78.4465		86.071	88.3272	86.3427	74.3651	87.1434										93.3672				73.9586								92.1551	95.88		94.0508	89.4132
53				84.4914	89.1321	99.3802		80.8456	97.613		90.345	94.4344	90.2461	93.6501			78.0743		86.0391	88.137	88.1591	73.6471	87.9787																						91.8647	96.9548		94.0494	89.1694
54				83.7554	89.1423	99.4411		80.0177	97.6916		89.3261	93.9529	90.2807	93.6803			77.0197		85.8463	87.4887	87.2063	73.6955	87.2276																						91.8991	96.6246		93.7584	89.1086
55				84.3615	89.5715	100.326		80.2382	98.2179		88.8537	94.1122	89.8297	93.4591			77.1044		85.7516	87.9701	87.7367	72.2176	86.4576																						92.9513	95.8673		93.0025	89.62
56				84.2133	88.497			80.396	98.0938		88.9889	93.8067	90.5139	93.1993			77.0948		85.77	87.0905	86.9099	72.9501	86.6059																						92.5139	96.8666		92.7097	89.2931
57				84.4851	88.9605			80.6222	97.7951		88.1624	93.9696	90.4842	92.4622			76.5335		86.6674	86.5768	87.1814	73.0438	86.3168																							95.9983		91.9104	89.1505
58				84.0121	88.7827			79.822			88.5036	93.7324	90.4729	93.5605					85.9954	86.9622	87.1055	72.3171	86.1581																							96.9953		91.8188
59				84.3553	88.0836			80.4796				94.2333	90.2413	93.1912					85.5832		87.356		85.34																							97.2029
60				83.0162	88.055							94.316							85.3718		86.4624		86.0546
[truncated: 40 more columns]

## Sheet: Y27 area
t	1	1	1	2	2	3	3	5	5	5	6	7	8	8	8	8	9	9	9	9	9	9	10	2	2	2	6	7	7	8	8	9	10	10	10	10	10	11	11	11	11	11	1.1	1.1	1.1	1.1	1.1	1.2	1.2
	1	2	3	4	5	6	7	8	9	10	11	12	13	14	15	16	17	18	19	20	21	22	23	24	25	26	27	28	29	30	31	32	33	34	35	36	37	38	39	40	41	42	43	44	45	46	47	48	49
0	6.76	11.129	10.505	71.868	69.996	30.578	48.363	37.338	10.609	7.592	17.993	24.649	27.146	20.801	27.458	29.85	23.401	11.233	19.865	40.666	43.891	11.545	81.021	11.025	14.561	5.928	4.472	10.609	35.882	24.337	7.8	43.787	5.304	30.682	12.793	6.344	31.41	33.594	15.289	6.656	10.713	41.082	9.881	16.953	14.145	11.025	8.321	13.729	15.913
1	12.897	14.769		104.526	95.686	48.779	65.42	64.172	26.106	29.746	44.931	66.564	52.211	35.778		104.214	50.547	15.185	51.483		80.397	52.003	107.646	23.505	33.178	20.177	27.978	27.874	72.7	50.027		67.916	23.089	47.427	29.33	23.297	80.189	54.083	52.835		115.759	97.142	19.761	33.282	22.881	30.162	55.955	74.156	36.194
2		44.723	51.691				79.773	90.901	46.803	69.684	67.396	67.396	89.861	48.675	112.431	118.151	72.284	29.434	107.958	50.339	95.062	87.677		62.924	55.227	45.555	58.243	55.851	86.325	66.772	30.162	80.293	51.483	93.918	67.812	72.18	97.454	56.371	89.445	26.21	185.235	115.031	51.067	50.547	33.074	78.941	89.757	119.607	65.94
3		52.419	54.603			59.596		177.123	64.484		126.264	94.022		62.82	176.707		110.871	53.355	118.775	105.358		95.062	246.807	93.19	90.589	56.475	69.892	78.213	115.135	71.14			78.421		79.877		142.801	82.789	129.904	46.699	247.223		60.844		54.187			172.234	86.741
4	28.914	68.228	60.74	212.693			102.342	178.579	87.053		167.242		159.13			201.252	125.016	91.005			204.476			112.639	115.031	85.181	100.262	97.038			53.667	121.583	110.559	146.233	118.775			137.184	187.939		291.946		77.589	99.43	82.685	166.618	148.521	201.98	141.553
5	38.794	115.863	79.773			72.7	116.383		105.254		203.124	165.89	193.764	98.494	211.133		139.888	110.351	167.138	125.016		142.385	276.345	166.826	189.291	96.206	111.287	120.647	120.335	107.334			131.048				190.435	186.275	245.143	66.876	324.083	170.362		105.774			213.213	237.758	225.278
6	64.9			267.088	247.535	177.539		305.362		53.563	252.527		206.036	167.866		237.03		128.552	191.996	124.391	224.862			240.982			120.751	137.912	191.684		76.133	196.884		221.117	173.17	78.213					385.239		111.703	176.395	172.858	192.516	243.999
7	96.726	131.152	125.848				128.76		141.032			211.445	232.766	192.412	240.462		177.955	162.77				177.123	299.434	271.872	208.429			162.562		126.992	97.038	281.337	172.962	236.198			268.336	208.429	285.081	161.418	432.354	235.158						270.936	254.399
8	152.577				274.681	196.78		391.896			313.267		247.639			247.847										168.178	137.6	155.801	229.438		136.872				228.19	97.558					485.917		153.305	196.676	206.348	248.783	318.779
9		180.659	228.294	274.472			155.697		186.379	73.428		252.527		219.037	285.601			202.292	235.886	164.538	268.336	196.156	377.543	341.661	239.422			185.339		189.395		307.338	215.501	333.86			345.717	261.68	293.61	178.475	557.682	293.09	184.195					336.772	322.419
10	219.661				299.122		156.217	368.702			385.655		287.057			305.674	220.805			163.082						224.237	161.73		240.254		161.106				254.399						629.758			222.365	195.324	285.497	411.969
11		210.925	260.536	298.394			210.717		193.036			278.841		261.264	343.013			238.174	296.938		300.266		422.161	431.21	282.169	308.483		249.199		222.469	201.98		242.335	389.295		121.583	434.538	312.435	339.996	203.852	696.218		216.125					414.673	399.8
12					305.362	182.843	193.348	390.127		104.318	407.184						255.231			251.487		237.654		447.435			207.18				240.566				290.281						707.451	342.909		300.162	226.526	309.003	508.591
13	263.864	219.973	303.178	325.852					231.934	124.287		319.091	335.212	288.513		369.222			320.027							329.596		302.762	289.033	213.837			288.617			155.801		328.14	395.12	188.043			248.055					489.869	471.98
14					327.828	209.885	226.734	437.034							444.315					299.954	350.605	246.703	493.822		320.027		240.774				263.864	375.047		484.565	338.436		478.117					352.477		316.803	206.14	294.962
15		239.838	382.847	353.621					232.87			378.791	371.406	305.466		409.785			375.255					538.648		342.805				229.334			278.009						428.402		828.93		259.6					565.066	544.577
16	301.826				350.397			455.131		240.254					496.11		280.193	286.953		357.677			529.808				267.088	368.182			248.679	439.114		583.163		156.425	541.249	349.773		195.948				377.647	246.911	361.318
17		264.8	421.225	387.631			362.566		271.144		506.926	414.049										283.313				410.513				241.503			339.164									430.378	316.907					660.544	608.957
18								488.829		283.001			424.346	358.926		491.846											262.824		397.096							219.869		368.702	451.491	209.053					260.432	403.752
19		277.593		428.194	397.928	227.046						499.646			603.028				401.568		439.53		577.027		441.819						269.48	518.887	359.238	688.521	411.657		728.668				953.737	480.613
20																								588.051			279.361			238.694						286.017							357.157	452.323	284.769
21	337.812						478.325			316.595							313.891									525.96		502.454					381.079					420.601		288.617									862.628
22		307.13	542.081						365.998		525.96									472.396							291.009														1086.66	586.803		473.54	358.094
23								644.839					511.087			608.749													458.668	289.449									524.296
24				543.537	442.651	315.971						523.671			834.234				563.506				625.078				350.813				309.523	633.918	435.37	821.649	434.434		797.416
25																																													355.909
26																	369.118	429.858								564.026							442.651			365.27		538.96		342.597									1037.57
27	397.408	356.637	654.303						434.434		662.52									526.792		558.722																				697.154						1043.08
28								783.583					564.962	470.004		701.106																							673.752							518.575
29				621.853	579.003							672.296			989.827				652.951		550.713		690.706		628.822						370.262	721.491	473.852				884.573
30																								884.781																			629.758		387.111
31							665.328			427.986																865.956		698.61
32																																												689.873
33																													646.087
34						420.705																					456.067							1004.7
35																																													462.828
36																	521.383	514.831																				710.051		436.098									1308.09
37	523.463	446.811	775.887						579.315		807.088									664.6		638.598													695.906							1062.53						1335.96
38								1038.5					673.648	651.599		951.137																							792.424							597.932
39				735.74	800.432							770.894			1370.59				813.849		689.249		914.215										536.672			539.792	975.059
40																																											787.743
41							797.52			615.821
42																									813.225						524.608	1075.22
43																								1181.82																				873.757
44						463.244																				1000.85		950.305
45																																													549.569
46																	682.177												907.975																				1498.52
47		564.338	908.495						696.634		796.792							682.697		783.791		905.686					543.641							1230.08														1647.77
48								1294.15					731.892	719.411		940.321																														597.308
49				966.53	1006.36							879.997			1843.72				1009.28		765.59		1130.65															844.739		570.578
50																																										1294.05
51																																							945.625				969.858
52							912.135			716.083																							710.467				1357.18
53
54
55						531.472
56																																													653.367
57																	915.567																																1620.42
58									701.834		977.139									916.503		937.928																										1718.39
59								1473.46					816.137	865.644																																639.95
60				975.579	1104.65							988.059			1923.39				1074.49		754.461		1259.93
[truncated: 39 more columns]

## Sheet: CK-666 volume
	5	6	7	7	7	8	8	10	10	10	10	11	11	11	11	11	11	11	11	11	2	2	2	4	4	5	5	7	7	8	9	9	9	9	10	10	10	1	1	1	2	2	2	2	2	2	2	2
	1	7	5	9	10	3	7	1	2	3	4	1	2	4	5	6	9	10	11	13	1	2	6	1	2	1	4	1	2	1	1	4	6	9	2	4	6	1	2	3	1	3	4	5	7	9	10	12
1	1029.26	1826.58	1542.07	1155.96	831.438	2370.92	1731.97	1140.74	912.102	1119.78	1664.97	971.77	2070.95	1200.21	1598.87	1662.65	1151.44	1987.07	2544.62	1009.79	907.762	818.926	788.559	944.338	1362.26	1560.06	1178	970.304	885.365	1425.67	1556.11	1345.18	1592.14	1536.54	1184.85	1261.67	1730.77	1447.11	1829.88	1585.59	1353.02	1863.05	1743.02	2163.95	940.663	2004.73	1736.03	1782.57
2	1023.94	1837.73	1549.83	1162.8	842.18	2438.49	1728.86	1160.56	929.121	1137.77	1674.57	973.886	2125.43	1219.88	1629.36	1685.94	1152.93	1984.77	2580.68	1021.54	907.017	814.11	789.867	935.483	1388.04	1548.71	1196.86	972.362	904.323	1431.34	1596.13	1363.59	1611.05	1531.03	1189.45	1268.13	1717.77	1483.41	1880.69	1616.87	1356.86	1925.73	1737.99	2167	922.138	1997.1	1748.37	1768.59
3	1026.82	1845.77	1573.8	1174.08	844.819	2460.97	1738.94	1180.3	944.302	1137.66	1682.34	976.45	2135.87	1227.36	1650.66	1699.59	1145.33	1984.91	2605.98	1042.71	919.207	839.22	778.314	945.397	1407.6	1573.46	1220.05	977.42	928.839	1423.32	1615.12	1355.15	1621.17	1583.49	1200.86	1275.87	1724.45	1497.52	1929.64	1627.97	1362.94	1933.43	1730.01	2189.53	922.318	1990.11	1742.1	1759.61
4	1047.74	1853.24	1585.6	1171.53	842.318	2489.15	1841.66	1205.57	964.378	1135.79	1694.75	982.066	2127.18	1246.58	1623.21	1708.34	1155.18	1978.18	2621.99	1048.69	912.453	843.239	779.209	942.132	1432.09	1583.87	1215.89	976.643	918.987	1428.55	1620.95	1357.5	1624.27	1582.79	1216.86	1332.8	1741.36	1565.59	1931.84	1607.41	1387.61	1958.12	1741.21	2191.86	925.343	1986.95	1765.89	1713.83
5	1056.86	1878.01	1589.33	1188.17	856.662	2544.85	1855.93	1194.95	985.231	1147.56	1701.45	982.627	2124.35	1252.18	1657.45	1704.54	1183.36	1951.79	2657.58	1069.39	918.222	850.107	788.453	939.18	1446.59	1604.83	1238.06	976.656	917.151	1464.62	1641.68	1367.99	1612.16	1578.39	1235.43	1393.96	1726.04	1610.31	1910.21	1590.54	1397.98	1942.8	1734.36	2227.47	936.199	1996.7	1742.93	1697.13
6	1057.22	1894.75	1578.84	1187.39	856.123	2572.8	1886.85	1193.56	995.648	1166.72	1705.66	985.618	2121.63	1278.91	1709.57	1714.32	1192.65	1971.6	2662.64	1060.98	920.947	850.258	784.635	946.27	1483.84	1639.11	1238.02	976.426	938.48	1475.58	1649.74	1374.54	1652.26	1586.07	1259.55	1368.7	1707.84	1663.52	1977.76	1554.58	1387.22	1904.68	1733.65	2235.54	938.731	2013.71	1760.59	1683.59
7	1080.79	1905.06	1593.72	1188.59	866.811	2590.5	1840.66	1195.66	990.295	1155.78	1720.29	985.276	2084.24	1286.22	1698.65	1704.89	1191.35	1976.32	2676.48	1069.03	932.058	847.217	784.129	950.572	1481.9	1683.96	1235.17	985.735	951.671	1484.23	1692.56	1378.76	1663.02	1565.07	1261.11	1342.03	1699.98	1747.98	1960.55	1539.35	1383.89	1894.39	1708.09	2271.5	943.601	2010.79	1801.71	1689.25
8	1090.34	1924.64	1612.33	1213.92	864.231	2581.47	1809.53	1172.43	1018.32	1162.11	1707.12	992.185	2061.28	1302.22	1713.51	1698.75	1218.18	1945.63	2679.15	1087.64	933.013	847.786	771.777	953.095	1483.07	1673.01	1248.19	983.339	974.324	1496.76	1713.98	1387.05	1688.86	1554.04	1265.38	1287.96	1692.35	1729.62	2051.16	1521.4	1375.09	1871.58	1693.05	2289.74	940.614	2023.17	1785.05	1674.43
9	1084.2	1953.28	1612.62	1226.57	874.33		1789.37	1167.38	998.517	1163.43	1694.12	993.677	2073.06	1282.41	1705.31	1706.74	1210.03	1932.52	2672.51	1084.78	920.923	846.162	766.18	955.201	1488.2	1664.93	1268.41	989.075	976.809	1518.44	1756.63	1383.61	1702.81	1544.94	1292.2	1209.69	1671.35	1731.04	2010.91	1528.03	1363.19	1866.29	1677.48	2237.55	925.626	2013.88	1792.3	1688.07
10	1094.8	1979.49	1603.38	1252.83	867.28		1779.14	1182.83	1012.74	1154.55	1692.14	1013.09	2039.68	1266.86	1711.08	1721.92	1206.06	1928.73	2690.4	1081.28	925.408	866.353	754.501	969.529	1500.95	1568.46	1257.39	985.638	961.941	1535.97	1756.12	1394.68	1718.74	1533.46	1289	1180.96	1667	1732.83	1937.19	1511.35	1345.49	1853.85	1657.65	2210.4	910.276	2012.93	1812.66	1658.63
11	1090.7	1980.51	1627.12	1259.71	883.249		1772.86	1222.17	1021.65	1171.05	1674.44	1013.27	2021.01	1264.04	1687.94	1710.24	1221.36	1909.84	2701.22	1062.65	927.104	868.855	749.658	962.428	1492.62	1583.43	1258.79	993.084	984.892	1526.7	1747.44	1403.26	1710.5	1523.38	1307.28	1163	1663.94	1753.52	1891.86	1508.4	1348.19	1824.52	1660.46	2210.32	915.48	2013.03	1777.16	1653.48
12	1093.23	1970.38	1647.54	1248.27	895.385		1748.39	1261.3	1020.83	1154.45	1659.99	1026.62		1245.77	1701.39	1709.41	1213.39	1892.26	2700.56	1057.36	921.411	881.55	735.648	975.902	1503.39	1573.72	1299.21	999.908	945.773	1555.88	1716.39	1386.65	1712.03	1517.75	1292.71	1165.2	1667.21	1745.52	1891.25	1498.38	1335.05	1813.19	1658.31	2203.13	930.331	2027.6	1756.74	1654.33
13	1111.55	1960.38	1658.64	1260.68	888.386		1768.4	1242.9	1023.27	1180.54	1641.27	1004.77		1220.55	1726.15	1726.01	1204.03	1888.9	2686.77	1060.22	918.714	885.374	742.644	992.574	1500.66	1535.27	1286.2	997.562	959.296	1546	1704.31	1370.93	1681.19	1499.65	1281	1167.78	1662.83	1741.38	1831.58	1499.69	1330.2	1799.5	1653.4	2202.31	930.527	2020.03	1729.1	1655.9
14	1085.83	1968.25	1664.08	1248.78	885.076		1771.59	1276.91	1042.11	1170.19	1643.89	1015.87		1219.52	1708.08	1687.74	1199.3	1877.89	2723.68	1045.74	916.129	891.473	742.304	1003.32	1497.64	1484.2	1272.44	1000.71	930.348	1592.95	1715.98	1374.53	1664.65	1494.99	1272.65	1168.76	1668.48	1737.72	1828.35	1507.98	1297.89	1793.65	1667.47	2186.52	930.98	2001.85	1737.29	1660.72
15	1105.32	1950.99	1653.5	1223.1	890.241		1789.17	1245.44	1019.06	1180.19	1633.15	1013.05		1197.7	1715.67	1690.22	1191	1869.07	2689	1058.27	902.333	893.184	735.66	1004.34	1504.89	1487.12	1255.72	993.465	971.346	1589.26	1696.94	1376.75	1656.81	1476.01	1267.93	1174.42	1687.03	1711.7	1839.78	1514	1304.72	1761	1656.78	2177.84	939.471	2024.7	1710.76	1670.5
16	1077.87	1942.38	1672.04	1233.05	885.731		1782.73	1252.09	983.244	1166.87	1632.06	1024.14		1191.21	1712.05	1736.66	1188.1	1862.59	2693.15	1046.89	895.282	897.536	730.419	1009.53	1462.87	1455.94	1272.6	989.745	958.295	1602.62	1737.42	1370.36	1649.21	1477.82	1286.8	1183.94	1695.3	1712.3	1798.3	1499.05	1304.71	1765.4	1686.57	2188.04	940.81	2023.99	1726.42	1629.98
17	1067.91	1948.33	1691.14	1246.44	884.071		1791.06	1264.42	1009.94		1618.78	1015.29		1178.53	1698.86	1707.39	1187.25	1855.57	2712.08	1024.14	889.037	895.174	724.922	993.694	1479.14	1433.02	1249.36	993.728	962.531	1614.96	1732.13	1368.7	1631.75	1475.5	1281.74	1186.18	1703.9	1717.09	1805.66	1509.59	1291.11	1733.03	1666.64	2178.12	928.221	2002.46	1688.12	1625.22
18	1057.49	1943.99	1697.37	1253.81	875.682		1813.69	1258.3	1030.79	1171.69	1615.26	1010.09		1162.4	1682.11	1695.03	1171.18	1857.06	2683.35	1017.37	892.266	879.226	716.31	995.56	1476.25	1420.6	1242.94	986.394	964.889	1605.88	1703.17	1357.97	1649.35	1477.15	1290.13	1188.92	1709.72	1736.6	1769.95	1494.91	1261.6	1751.81	1677.36	2170.82	944.842	2000.3	1671.16	1674.42
19	1071.17	1952.54	1717.82	1260.36	876.434		1806.29	1268.57	1028.23	1167.68	1600.24	1034.12		1164.01	1657.86	1713.6	1156.39	1865.56	2703.24	1027.54	889.514	873.705	729.103	984.223	1489.26	1401.57	1233.74	994.116	952.905	1578.58	1682.68	1355.64	1623.41	1479.81	1289.24	1192.42	1729.44	1720.56	1734.4	1498.99	1262.04	1765.74	1683.52	2174.95	941.746	1967.3	1671.78	1620.64
20	1101.63	1945.97	1716.45	1260.17	891.836		1777.23	1257.52	1034.99		1595.82	1033.86		1160.3	1661.38	1702.34	1146.53	1881.21	2726.37	1041.85	896.596	884.276	720.344	982.445	1510.51	1430.3	1219.48	992.47	940.044	1613.5	1667.61	1352.54	1631.79	1473.26	1264.31	1200.91	1731.75	1710.28	1734.71	1519.19	1288.3	1736.12	1681.19	2164.49	948.436	1953.67	1673.81
21	1078.85	1925.75	1711.06	1240.79	893.532		1783.98	1230.12	1016.79	1168.81	1588.34	1019.86		1141.86	1666	1718.24	1127.23	1903.37	2715.67	1032.2	902.024	883.54	718.543	994.441	1500.06	1431.27	1228.72	994.09	907.698	1600.51	1670.46	1362.12	1641.81	1473.51	1247.07	1201.07	1758.77	1720.38	1744.72	1508.15	1273.63	1739.93	1679.12	2153.92	954.563	1949.33	1647.32
22	1067.9	1920.84	1699.96	1230.62	896.414		1788.13	1204.56	1017.93	1186.47	1589.41	1020.51		1131.58	1649.44	1720.11	1122.46	1910.4	2728.67	1026.96	904.335	864.985	727.217	997.568	1477.91	1433.54	1230.53	989.094	916.366	1585.77	1676.1	1350.91	1611.48	1475.08	1238.62	1201.45	1771.57	1707.48	1716.54	1537.43	1278.57	1745.56	1674.02	2192.29	947.617	1932.91	1671.44
23	1055.33	1917.58	1710.4	1224.33	901.454		1776.62	1177.54	1012.09	1175.87	1590.94	1020.28		1116.11	1640.95	1717.58	1139.73	1912.47	2744.69	1020.19	901.269	873.898	733.368	1011.08	1479.85	1435.83	1219.5	995.98	919.683	1602.84	1683.16	1343.88	1605.74	1471.01	1211.79	1211.22	1779.63	1704.63	1714.21	1531.55	1271.7	1740.76	1707.1	2177.95	945.441	1912.96	1641.83
24	1051.92	1917.83	1703.28	1222.49	902.533		1794.76	1183.19	1008.7	1178.38	1578.82	1015.69		1110.15	1645.14	1722.37	1143.24	1922.67	2755.42	1016.33	900.517	851.131	735.968	1003.55	1469.59	1429.76	1195.12	984.688	916.036	1583.41	1682.37	1340.08	1583.06	1458.2	1212.72	1216.45	1765.19	1685.63	1709.52	1530.54	1275.89	1720.48	1691.41	2186.58	956.573		1623.24
25	1039.19	1878.95	1714.04	1219.53	904.948		1778.89	1190.55	999.286	1169.37	1571.49	1012.48		1114.79	1643.25	1730.62	1148.39	1939.54	2744.7	1004.91	903.528	859.949	732.76	1004.48	1457.64	1436.5	1176.44	991.78	918.125	1585.14	1653.71	1337.95	1608.78	1452.97	1203.19	1216.93	1770.69	1684.59	1719.62	1519.87	1276.4	1751.64	1698.56	2135.4	952.414		1629.44
26	1046.6	1867.8	1735.52	1225.69	917.515		1761.7	1205.2	1011.57	1187.28	1569.73	1026.88		1109.05	1641.34	1730.5	1146.16	1937.17	2733.47	1009.22	914.232	848.554	739.69	1009.26	1439.17	1438.86	1180.75	984.395	926.275	1588.55	1633.94	1329.12	1587.23	1461.39	1207.23	1222.06	1769.21	1695.27	1693.98	1513.62	1294.85	1727.09	1681.88	2138.39	973.677		1635.04
27	1066.11	1887.15	1725.6	1224.82	929.421		1779.69	1173.67	979.658	1172.43	1575.47	1053.61		1104.63	1641.06	1737.27	1141.06	1924.47	2716.15	1022.22	910.243	846.565	741.175	998.231	1415.76	1429.38	1175.01	981.363	942.355	1566.93	1639.75	1329.56	1576.57	1455.02	1205.22	1227.44	1784.32	1689.28	1705.78	1520.99	1275.04	1722.01	1668.21	2141.61	956.207		1637.1
28	1073.06	1929.19	1712.67	1221.1	942.736		1764.46	1178.03	975.109	1171.32	1565.09	1055.86		1102.85	1665.53	1758.43	1141.05	1915.06	2713.47	1009.31	907.4	831.979	738.814	991.048	1426.4	1437.4	1173.06	990.149	928.544	1555.51	1604.31	1322.36	1567.67	1459.01	1196.41		1782.51	1704.8	1706.42	1535.82	1264.63	1685.25	1675.75	2114.94	957.398		1637.8
29	1063.74	1920.18	1706.35	1207.78	946.2		1757.96	1174.75	958.26	1179.99	1569.23	1060.24		1090.74	1651.35	1737.9	1145.14	1902.67	2707.84	1009.12	899.959	843.925	731.135	993.158	1393.18	1431.62	1183.84	987.623	934.748	1513.47	1579.83	1312.76	1577	1459.62	1200.8		1808.29	1716.44	1696.3	1534.61	1266.45	1697.82	1685.58	2111.99	955.77		1640
30	1055.3	1941.88	1713.75	1215.71	937.853		1752.79	1171.4	973.145	1192.43	1569.2	1058.26		1083.51	1662.86	1745.07	1136.66	1903.43	2709.74	997.767	896.321	845.703	732.923	993.188	1387.85	1441.19	1177.15	985.033	945.058	1498	1591.23	1319.91	1571.35	1459.13	1190.59		1805.96	1738.69	1703.32	1552.37	1264.26	1720.04	1682.46	2097.84	955.149		1646.99
31	1061.51	1926.82	1703.18	1230.21	945.151		1757.17	1167.99	970.907	1172.93	1579.07	1035.52		1078.56	1671.08	1749.39	1136.25	1887.42	2704.84	1005.65	904.996	840.192	732.42	994.682	1385.21	1416.27	1151.8	990.959	941.721	1503.74		1315.11	1553.34	1453.05	1191.7		1798.55	1745.47	1730.12	1528.85	1280.99	1682.81	1679.84	2063.93	964.449		1647.47
32	1057.31	1912.16	1713.45	1214.85	899.582		1764.63	1174.36	973.89	1177.65	1568.68	1051.78		1078.7	1679.52	1753.38	1146.79	1879.63	2711.58	997.767	910.323	842.129	730.08	982.746	1378.8	1443.66	1171.56		943.607	1467.18		1321.1	1541.99	1437.16	1200.37		1784.1	1732.66	1721.92	1543.39	1279.19	1652.75	1653.86	2074.83	963.118		1655.69
33	1068.11	1922.14	1696.93	1214.99	918.528		1766.79	1181.88	982.66	1188.18		1043.71		1084.92	1703.71	1748.4	1138.95	1883.49	2715.65	1008.1	911.502	842.335	736.987	982.258	1381.37	1434.96	1176.64		945.845	1525.67			1543.86	1436.44	1195.41		1779	1708.22	1720.08	1561.25	1281.88	1707.33	1684.37	2072.86	970.42		1639.75
34	1066.03	1918.81	1695.71	1208.65	925.949		1753.39	1148.85	983.738	1190.79		1043.15		1083.19	1707.62	1764.11	1140.62	1889.48	2731.04	1001.38	909.833		729.528	984.151	1371.15	1412.91	1154.8		947.449	1541.46			1558.85	1446.42	1195.32		1788.15	1724.77	1706.25	1537.98	1267.69	1677.06	1641.96	2068.27	967.26		1633.87
35	1069.32		1696.59	1205.89	922.406		1766.1	1167.73	978.261	1183.4		1029.15		1073.85	1708.66	1778.42	1138.68	1881.35	2712.96	1008.73	905.644		734.45	996.399	1369.72	1419.42	1164.04		985.894	1510.03			1563.36	1439.4	1174.16		1781.98	1713.61	1739.76		1279.03	1671.55	1672.51	2070.21	957.149		1648.34
36	1057.32		1677.36	1219.83	923.232		1764.94	1168.15	977.388	1175.2		1030.24		1074.03	1723.58	1770.15	1139.41	1879.22	2729.89	1013.79	895.948		743.183	979.998	1375.2	1434.85	1167.67		994.869				1566.62	1446.09	1186.5		1787.38	1729.7	1725.02		1277.06	1685.04		2070.32	966.049		1610.32
37	1062.24		1703.84	1208.71	933.76		1760.81	1171.65	976.469	1178.26		1039.67		1072.93	1722.39	1801.41	1142.04	1883.15	2738	1026.9	899.379		748.314	986.141	1372.05	1433.83	1166.44		957.087				1558.25	1451.03	1190.9		1800.73	1757.4	1735.32		1284.74	1654.69		2075.04	963.494		1615.01
38	1067.11		1689.96	1210.11	932.909		1766.79	1176.89	972.327	1188.28		1035.7		1066.7	1713.58	1839.02	1134.62	1883.72	2738.76	1020.84	892.738		745.938	987.48	1370.59	1439.82	1164.56						1577.52	1448.42	1190.21		1792.7	1765.01	1750.83		1288.8	1644.04		2040.57	960.402		1601.22
39			1688.46	1202.78	913.944		1760.16	1165.1	976.51	1180.13		1021.62		1071.4	1713.37	1898.97	1135.14	1886.4	2749.41	1010.05	897.537		739.629		1352.1	1434.88	1173.01						1578.57	1447.54	1184.28			1759.58	1751.76		1255.36	1661.11		2057.69	965.048		1606.49
40			1687.98	1211.24	915.194		1741.56	1156.19	970.95	1173.74		1001.36		1067.03	1713.3	1894.25	1129.34	1880.43	2746.59	1014.67	894.112		741.631		1351.18		1157.21						1559.35	1446.31	1169.07			1762.86	1713.74		1277.99	1678.33		2011.33	958.714		1614.9
41			1694.39	1218.53	921.105		1742.04	1165.15	980.004	1177.99		1025.51		1070.68	1724.58	1863.66	1124.77	1874.6	2762.15	1019.17	896.273		733.699				1156.76							1436.36				1749.33			1287.58	1666.99		2033.71	950.921		1647.76
42			1702.09	1212	908.68		1738.47	1157.36	980.29	1178.84		1038.95		1063.66	1731.77	1840.97	1132.56	1876.53	2763.81	1006.06	897.028		733.518											1450.96				1757.7			1286.58	1605.11		2042.35	964.193		1630.38
43			1690.79	1216.21	908.765		1708.62	1165.55	971.144	1180.74		1036.48		1061.18	1725.47	1816.76	1125.58	1874.87	2765.19	1000.19	897.301		735.343											1447.55				1772.19			1272.02	1644.93		2055.95			1629.08
44			1688.26	1215.94	899.884		1713.56	1175.91	975.081	1174.76		1055.54		1061.18	1741.28	1825.29	1126.51	1853.54	2765.96	1002.8	885.964		734.902															1719.53			1265.9	1666.07					1628.92
45			1686.59	1214.9	892.778		1728.3	1185.3	962.781	1186.24		1045.85		1069.78	1762.8	1829.51	1119.75	1846.18	2764.27	1017.47			735.717																		1271.47	1654.64
46				1215.15	902.745		1726.17	1194.38	952.777	1189.59		1024.35		1070.63	1760.36	1828.11	1114.6	1842.86	2780.14	1009.4																					1274.44	1665.75
47				1222.6	904.213			1194.58	950.724	1183.84		1034.63		1072.32	1767.44	1834.09	1113.78	1843.8	2782.12	1021.97																					1290.69	1680.83
48				1219.39	903.72			1215.58	961.729	1186.38		1050.5		1067.09	1772.45	1844.09	1110.72	1846.91	2779.51	1010.78																						1689.93
49				1220.17	896.126			1226.66	975.604	1186.91		1049.9		1062.05	1792.97		1112.9	1843.94	2776.84	1014.1
50				1221.62	893.623			1216.58	972.728	1189.57		1067.12		1064.39	1821.09		1106.84	1844.84	2774.52	1008.59
51				1219.85	900.235			1218.19	961.1	1197.07		1042.76		1066.17	1823.01		1107.38	1852.34	2776.55	1034
52				1205.92	890.227			1225.92	963.402	1194.49		1041.44		1059.63	1833.23		1106.57	1855.21	2780.22	1030.58
53				1198.34	894.991			1222.87	968.466	1194.19		1059.72		1054.28	1821.65		1112.65	1845.52	2777.16	1032.52
54				1198.37	891.001			1221.75	961.142	1196.62		1066.91		1054.06	1831.29		1106.31	1859.18	2785.42
55				1196.94	888.297			1233.27	967.578	1200.27		1061.02		1065.01	1831.52			1865.02	2780.79
56				1195.56	892.958			1225.94	962.083	1200.34		1067.56		1069.08				1851.27	2791.56
57								1241.83	947.33	1190.5		1069.49		1071.81				1846.25	2772.11
58								1245.27	954.579	1187.41		1074.2		1069.65				1834.45	2764.06
59								1248.08	970.523	1201.18		1073.51		1070.31					2762.6
60								1247.76	970.624	1199.14		1050.76		1064.17					2767.2
61								1263.4	984.485					1068.02					2762.31
[truncated: 52 more columns]

## Sheet: CK-666 area
	5	6	7	7	7	8	8	10	10	10	10	11	11	11	11	11	11	11	11	11	2	2	2	4	4	5	5	7	7	8	9	9	9	9	10	10	10	1	1	1	2	2	2	2	2	2	2	2
	1	7	5	9	10	3	7	1	2	3	4	1	2	4	5	6	9	10	11	13	1	2	6	1	2	1	4	1	2	1	1	4	6	9	2	4	6	1	2	3	1	3	4	5	7	9	10	12
1	4.472	21.945	14.665	6.24	4.784	39.418	5.824	45.971	4.368	9.777	17.889	8.841	13.313	15.185	5.512	16.017	9.881	5.512	8.008	7.8	21.321	6.344	39.938	6.656	15.081	15.289	16.121	4.576	10.505	4.576	19.449	11.441	3.536	26.002	14.561	5.304	11.233	24.025	26.106	11.025	12.897	8.945	12.897	18.825	26.21	12.897	21.945	11.337
2	7.8	45.243		29.642	8.425	90.589	17.993	53.355		37.442	29.642		40.25	37.858	18.201	22.985	24.753	16.017		11.961	39.834	30.682	86.325	10.505		33.282	22.153	6.344	30.89	10.089	25.274	26.73	15.497	56.267		13.209	23.713		40.042	21.321	26.21	36.09	21.737	49.091	47.323	30.994	43.267	27.25
3		89.029	28.706	43.059	13.625	102.446	29.538	98.702	11.961	55.643	64.068	8.633	73.948	42.435	51.899	34.426	56.579	61.156		23.401	66.044	70.412		11.233	37.858	51.067	48.987	13.313	56.475		47.531	50.131	28.082	67.292		42.019	59.804	24.441	48.467	36.194	46.491	79.773	37.234	54.915	43.475	48.363		100.574
4	33.698	83.621		67.188	19.553		40.874	82.373	23.505		92.982	14.457	108.375	64.068	51.587		45.763	85.597		35.154	105.462	155.905	108.167		62.82	50.339	49.611	24.649	85.909	23.297	55.123		38.898	83.101	21.945	74.052	92.462	36.61	57.307	73.22	82.581	106.502	62.404	62.82	52.627	69.684	106.71	136.352
5	54.707		30.578	41.602	14.665	109.311	53.771	86.845	44.619	49.715	98.078	20.177	125.744	67.812	99.846	74.364		104.214	21.945		106.606			23.401	77.693	89.133		35.674	94.854	53.459	87.157	68.124		125.952			125.848	33.282	90.901	148.937	139.368	154.033	95.998	74.989	44.099		138.64
6	144.881	136.872		63.652		195.428	63.548	106.814		70.62	109.207	36.402	193.972	115.031	179.827	60.012	65.42	123.559		63.236		157.361	154.657			130.112	81.541	41.602	137.08		99.014		59.076		58.139	101.51	152.057	47.011	119.503	166.514	180.243	234.638	157.465	73.844		149.561	167.45	128.864
7		159.13	28.914	78.941	20.177	215.189	59.18	136.768	135.104	84.869	201.772	34.738	208.949	97.142			104.11	142.073			141.032			31.93	105.878			50.651		69.164	162.978	103.07		204.06	52.107	155.593	242.439	54.187	97.454		187.939	245.975	187.315		48.987	187.107	150.809	137.184
8	159.65	210.093		94.542		214.877	88.717	145.193		170.05			224.966	146.545	163.706	53.875	146.545	204.476		140.408	158.714	154.345	177.019			153.097		76.445	136.352				66.044		77.173	221.013		68.124		205.724	190.539			84.453		227.254	177.019	144.257
9			32.97		16.641		86.221	142.073	142.697		258.976	47.219	244.831				174.939				178.995			32.97	171.298	200.94				97.558	167.762	147.481	167.762	225.798	70.932		275.409	107.334	108.375			226.006	241.19		61.468			187.211
10	161.002	224.654		108.375	39.938		204.164			170.362		46.283	271.352	160.17	180.763	49.091		226.526	23.193	157.673		157.257	198.028	23.921			121.895	87.573	171.09						98.286	257.936		177.019	121.895	230.478	200.316					225.486		198.652
11			39.106	143.945				154.969	152.681		295.482		289.553			64.38	158.506	229.23			198.548				171.194	219.453				103.59	181.803	185.131	149.145	292.05			331.468	178.163	141.657			252.943	281.025	128.24	77.173		196.572
12	161.938	234.742	54.395		45.867		224.237			166.41				183.051	179.411			227.67		158.298	207.388		208.013	23.921			156.217	96.31	158.818	137.184					106.71	355.701			140.72	279.465	210.093					237.862		203.228
13				162.666				180.659	146.441			68.748				80.189	162.354	266.88				164.642			177.955						209.677	198.34	162.458	325.644	98.39		377.127		187.107			272.912	356.845		71.14		216.333
14			184.923		30.994		220.805			180.971				219.973	187.731	74.156				198.756	226.838		230.374			250.031	168.802	125.952	158.089	172.13					124.912			204.372	215.813	312.955	239.006			172.026		235.99		261.992
15		235.886		177.851				172.026	187.627								182.947	326.788	41.602					31.618	188.355						248.991	204.892	176.395	394.184			404.272					350.709					206.972
16	158.089						221.429			209.885		90.173		235.99						191.476	276.449		255.855	39.73			177.435	158.298	157.985	193.764					132.816			221.637	253.463	318.883	287.577		410.825	222.885				282.377
17			196.052	201.564	29.746			198.86	171.194									382.431			279.465			56.059							265.008	226.318	201.356	430.378	145.713	461.892	442.755					373.07					230.062
18	173.69	216.957					210.093					87.365		267.712			206.14			197.716		213.837	273.536					172.234	178.267	184.819									293.506		299.434			230.062
19								221.949	163.706	214.981					246.807						332.404			87.573		448.475					300.682	239.63	205.724	455.859	179.827							443.067					273.432	262.2
20			206.244	234.742			223.405					130.112		302.242			239.942		68.124	194.076			291.634		212.693			178.683	191.684	180.139									360.382					243.999
21	158.714		201.252		49.195			223.301	184.611		445.771					96.102								126.992			224.445								210.093			320.131									297.978
22				265.944								154.657						501.934		212.277				155.593				203.956	198.548	206.036		283.937	257.623
23		277.177						266.568	183.155								278.945																	520.135	216.541		529.08		369.118					241.399	79.669	334.172
24			204.06		22.569					259.08		146.233			310.251						409.369			206.348		575.467		200.316		201.044	341.349
25				317.115	37.962		230.894	252.319	188.147					393.248					89.653				326.58	204.476	234.43								323.667		254.503												311.291
26												151.849															247.015	207.076										432.042
27	164.538																	530.848		200.316									245.143	208.533		322.835				512.959
28					56.475																			250.135										549.153							411.969
29										272.08		158.402				84.245					403.336																					771.414
30								310.355	230.166			160.274		549.361					75.509				347.589							257.519	361.006		395.12
31					107.334																							228.502
32											569.33					88.613				269.688												360.278
33					131.152												370.158					316.699		240.566													577.027
34		352.477	269.584									188.251			398.968	68.748																								507.863
35				424.866	140.2		272.704									123.351			103.278											279.985			464.7		330.844								824.042
36																173.482
37					126.16													508.071											295.17
38	198.132															172.234								253.151										673.44			597.412
39										385.759		201.668				164.746										712.859
40					130.632			399.072	250.759					716.915					115.655						303.698								473.124		342.805				556.849
41																167.866											354.661
42																				320.339																									117.631
43																205.204	457.107																	698.298										429.026
44															434.954						458.356																	645.671									431.626
45			346.549	513.063	145.921											247.119			119.087				393.768
46							338.02
47																		629.134																							574.427
48																303.698																										1090.61
49										407.6		278.945
50								371.822	280.817					823.938					172.442
51
52
53																				348.213
54																	471.044
55															497.046
56				522.007	185.859
57
58																		574.843
59
60										421.641		276.969
61								451.283	278.113					737.924					226.318
[truncated: 3 more columns]

## Sheet: EIPA volume
1	1	1	1	1	1	6	6	6	6	6	5	5	5	5	5	5	5	5	5	5	5	1	1	1	3	3	3	3	3	4	4	4	4	4	5	5	5	5	5	6	6	6	7	7	7	7	7	7	7
1	2	3	4	6	7	1	2	3	4	6	1	2	3	4	5	9	10	11	12	14	15	2	3	4	3	7	8	9	11	3	5	9	10	17	3	4	6	9	10	3	5	6	2	5	7	8	9	10	11
2165.13	3035.39	1731.2	1309.26	1974.61	2956.62	2705.3	3294.16	2415.08	2384.99	1181.73	1884.62	2193.78	2023.12	1933.72	1946.35	1424.81	2274.94	2168.47	2957.01	1333.57	1280.76	1541.92	1424.59	1946.71	1502.55	1108.17	1525.07	1135.06	1037.94	1224.4	3712.05	1505.23	1672.53	1524.05	866.651	2256.82	1187.18	1398.37	1271.74	1332.93	1191.73	1147.18	826.756	1005.98	1606.94	1634.68	3185.8	1256.11	864.876
2197.15	3013.1	1742.25	1320.36	1955.34	2991.94	2674.08	3317.86	2419.76	2393.87	1187.8	1915.7	2164.91	2036.51	1999.03	1974.74	1452.55	2265.3	2146.26	2927.53	1367.65	1318.76	1543.86	1434	1972.88	1517.04	1113.78	1566.46	1127.41	1054.75	1228.23	3725.74	1537.36	1669.02	1533.77	874.934	2243.56	1196.05	1425.65	1264.77	1329.72	1199.33	1128.97	833.224	987.621	1609.86	1646.19	3169.63	1257.76	876.224
2239.46	3073.36	1777.29	1331.96	1989.05	2988.23	2702.92	3291.47	2459.21	2413.94	1183.04	1905.37	2157.77	2038.02	2043.98	2046.5	1459.5	2295.55	2093.6	2874.95	1407.76	1398.2	1563.92	1437.85	1978.89	1540.53	1124.61	1597.7	1127.95	1055.33	1208.01	3725.19	1553.37	1681.72	1532.01	869.432	2253.18	1202.33	1432.53	1266.14	1332.62	1213.2	1129.14	829.948	994.308	1616.58	1629.92	3194.78	1248.68	897.352
2255.03	3142.96	1795.26	1328.97	2061.78	2998.39	2764.87	3347.94	2460.88	2460.67	1176.13	1917.05	2138.15	2014.63	2069.12	2018.18	1435.57	2279.5	2067.23	2810.01	1430	1439.82	1561.08	1432.17	1996.59	1534.32	1136.94	1596.18	1166.75	1059.98	1215.16	3716.3	1592.64	1677.89	1533.6	889.169	2259.66	1209.96	1450.59	1278.46	1336.6	1212.44	1121.24	839.242	990.109	1618.01	1634.07	3213.97	1233.12	897.282
2289.63	3136.82	1769.67	1285.02	2030.6	3045.38	2790.79	3320.14	2473.02	2518.58	1192.82	1916.52	2135.42	2034.38	2025.87	1998.68	1428.6	2275.7	2065.5	2814.92	1450.11	1429.32	1579.35	1429.6	1965.1	1641.99	1137.39	1621.14	1207.52	1079.07	1239.6	3716.83	1595.78	1686.52	1502.98	885.741	2253.99	1199.72	1447.53	1280.44	1320.19	1220.65	1114.48	854.831	987.034	1623.26	1633.2	3207.74	1213.09	909.392
2316.33	3207.99	1730.02	1303.87	1956.62	3065.64	2815.31	3317.42	2482.79	2509.21	1266.6	1932.53	2071.37	2016.59	2049.77	1949.33	1421.38	2288.66	2039.43	2788.92	1485.05	1431.14	1590.52	1427.13	1948.25	1634.68	1136.49	1640.66	1203.69	1069.07	1238.34	3665.1	1568.75	1677.4	1488.14	884.441	2251.1	1203.42	1454.19	1284.06	1317.9	1222.74	1110.65	858.187	995.367	1614.08	1627.29	3211.33	1185.15	916.614
2251.09	3179.07	1713.37	1301.95	2013.37	3105.19	2802.94	3343.33	2488.6	2510.28	1233.59	1931.13	2066.49	2029.4	2038.05	1900.86	1387.15	2268.43	2048.21	2745.94	1465.16	1395.92	1564.72	1436.33	1961.46	1618.38	1142.01	1664.08	1201.61	1062.52	1265.44	3689.61	1555.93	1664.04	1468.67	888.683	2250.57	1191.96	1469	1296.13	1318.57	1235.47	1116.43	869.476	996.038	1604.8	1635.38	3229.25	1174.31	910.952
2295.32	3203.09	1704.07	1267.01	1997.63	3108.66	2769.64	3332.2	2475.05	2555.86	1258.43	1937.52	2026.31	2023.4	2050.46	1899.89	1362.33	2274.18	2028.27	2778.29	1459.43	1336.65	1573.56	1441.32	1929.01	1596.8	1122.54	1637.81	1217.79	1077.55	1247.39	3699.31	1544.19	1649.88	1437.75	897.344	2255.07	1190.19	1469.46	1297.3	1296.81	1253.92	1110.68	869.644	1011.42	1612.19	1626.97	3241.38	1161.42	917.139
2234.11	3201.11	1661.49	1274.31	2051.95	3118.64	2752.76	3320.63	2496.83	2529.53	1230.82	1921.53	2014.72	2019.31	2018.32	1819.14	1343.87	2273.31	1995.63	2750.86	1429.84	1304	1590.79	1439.4	1914.12	1594.99	1112.57	1681.84	1204.95	1081.26	1244.71	3673.89	1530.77	1635.5	1433.95	891.913	2249.34	1188.42	1488.59	1304.04	1283.96	1256.98	1098.26	867.715	1007.21	1605.75	1589.38	3241.47	1157.17	923.217
2269.52	3168.88	1672.19	1250.87	2036.96	3140.4	2756.56	3293.87	2489.94	2510.33	1292.64	1921.85	1997.81	1991.56	2019.14	1842.77	1317.52	2258.26	2011.54	2740.6	1416.94	1230.84	1603.93	1426.22	1917.53	1582.28	1117.27	1683.64	1207.16	1077.16	1245.37	3682.43	1526.7	1601.71	1442.19	891.832	2240.28	1174.77	1490.61	1303.15	1292.76	1256.5	1089.11	876.201	1010.73	1601.66	1586.7	3257.64	1159.87	913.967
2238.79	3153.5	1671.22	1309.53	2012.06	3136.99	2762.72	3240.63	2469.53	2507.52	1308.9	1951.68	1978.08	1974.68	1951.78	1811.31	1336.94	2275.33	2005.48	2744.95	1427.36	1213.68	1574.77	1449.27	1911.31	1581.93	1106.31	1682.85	1202.75	1078.7	1272.56	3698.37	1507.11	1601.28	1429.06	887.599	2240.55	1181.27	1490.07	1299.19	1279.37	1270.31	1089.79	868.869	1011.23	1602.35	1580.99	3262.66	1138.75	911.604
2250.14	3117.65	1683.77	1384.6	1976.07	3102.38	2735.03	3239.3	2449.35	2559.49	1313.1	1932.53	2001.12	1953.87	1927.68	1835.13	1324.59	2276.26	1961.64	2756.56	1394.61	1177.73	1580.55	1453.29	1894.49	1565.11	1101.2	1675.13	1211.23	1062.55	1255.41	3696.43	1501.36	1620.13	1426.99	885.608	2234.9	1170.56	1497.31	1292.13	1268.19	1272.56	1091.98	870.611	1000.97	1608.56	1550.82	3256.91	1148.4	908.546
2229.51	3043.31	1717.29	1377.98	1927.59	3127.06	2711.96	3187.46	2442.59	2511.46	1338.04	1939.44	1959.21	1919.88	1888.75	1781	1303.05	2256.47	1954.75	2774.28	1422.96	1174.27	1585.54	1459.19	1912.21	1562.32		1679.87	1208.18	1074.19	1238.95	3697.29	1469.15	1631.48	1426.6	877.063	2214.7	1170.88	1505.81	1292.04	1272.39	1277.98	1092.39	868.688	1005.21	1600.2	1577	3217.08	1149.04	916.342
2205.01	3050.74	1745.98	1357.53	1957	3084.43	2696.37	3184.05	2445.91	2473.4	1352.82	1904.61	1967.33	1918.09	1867.27	1783.54	1308.29	2227.93	1938.82	2735.66	1411.73	1164.1	1575.44	1461.44	1879.02	1544.82		1665.02	1196.43	1071.81	1223.67	3697.49	1461.69	1621.36	1417.65	876.95	2225.76	1173.67	1499.36		1269.55	1277.86	1082.07	869.734	1020.93	1598.63	1542.46	3205.26	1157.29	907.949
2237.14	3040.72	1717.44	1363.72	1981.31	3064.52	2717.16	3154.38	2422.64	2488.66	1345.27	1904.3	1959.65	1910.57	1859.76	1744.54	1308.77	2214.88	1939.66	2782.17	1387.03	1161.09	1573.04	1455.86	1888.23	1554.36		1689.06	1195.06	1061.74	1200.44	3678.44	1451.35	1620.18	1412.12	863.844	2226.18	1170.09	1494.73	1294.73	1270.05	1283.21	1079.69	871.338	1024.69	1602.97	1523.38	3177.96	1152.58	914.014
2226.1	3003.64	1777.32	1361.9	1894.76	3021.28	2737.01	3131.91	2417.79	2509.8	1308.94	1888.34	1968.66	1911.08	1837.32	1844.9	1294.05	2207.47	1948.15	2768.94	1385.32	1155.85	1577.46	1461.19	1877.92	1546.98		1669.46	1186.6	1077.39	1188.83	3681.81	1448.47	1621.52	1401.73	865.156	2214.22	1160.94	1499.46	1311.86	1276.78	1279.01	1074.95	880.138	1022.34	1589.84	1509.13	3169.11	1139.81	922.102
2201.19	3014.7	1743.76	1384.67	1988.02	2981.74	2693.73	3130.21	2385.18	2463.37	1304.65	1887.09	2002.66	1854.26	1836.9	1766.71	1313.01	2176.62	1940.7	2785.16	1399.16	1149.3	1563.52	1455.53	1846.58	1533.77		1659.92	1200.57	1087.18	1180.38	3689.01	1446.18	1613.22	1398.76			1161.32		1301.91	1267.9	1284.53	1062.28	872.516	1021.12	1605.27	1516.06	3169.6	1149.7	918.921
2210.34	3007.49	1769.4	1410.93	1929.66	2970.46	2713.2	3108.02	2379.63	2474	1284.58	1870.05	1961.19	1872.18	1837.47	1736.35	1320.85	2175.51	1914.21	2834.05	1390.3	1144.56	1558.37	1454.12	1829.34	1512.88		1657.17	1169.66	1075.73	1159.78	3685.23	1453.59	1615.1	1392.26	867.022			1489.12	1312.59	1268.44	1280.16	1075.53		1018.78	1602.56	1501.39	3156.19	1153.56	923.646
2185.53	3050.13	1684.74	1343.1	1910.4	2977.56	2744.84	3073.03	2385.57	2461.81	1229.98	1864.62	1946.9	1854.54	1837.37	1751.44	1309.44	2141.21	1922.73	2773.51	1399.67	1138.88	1552.38	1455.2	1817.35	1514.3		1664.06	1146.55	1092.08	1149.43	3687.07	1440.99	1602.62	1400.63	848.904		1154.88	1484.24	1306.6	1258	1270.46	1060.96		1024.02	1603.48	1515.92	3142	1149.77	928.878
2179.09	3063.35	1806.17	1431.06	1951	2941.21	2689.28	3056.88	2356.97	2446.3	1242.77	1856.59	1981.72	1863.26	1825.49	1728.6	1331.21	2129.13	1904.22	2793.23	1408.22	1130.88	1545.35	1452.13	1798.25	1502.5		1673.84	1143.3	1084.66	1146.18	3666.36	1441.53	1598.74	1388.34	763.781		1152.78	1482.44	1310.12	1260.65	1274.64	1059.98		1022.3	1600.11	1509.21	3142.37	1155.19	921.119
2194.46	2985.14	1739.11	1357.58	1904.49	2965.86	2729.05	3083.33	2367.16	2435.84	1263.88	1852.03	1910.96	1866.32	1827.5	1755.06	1311.71	2134.59	1883.53	2774.58	1408.78	1135.9	1579.28	1434.83	1777.95	1499.86		1672.05	1154.37	1083.57	1146.62	3689.53	1439.62	1589.06	1385.07	776.039		1148.23	1475.82	1311.92	1251.03	1257.42	1050.76		1021.53	1599.28	1512.44	3125.32	1164.96	910.564
2152.79	2953.83	1746.02	1402.38	1926.62	2990.27	2720.47	3082.63	2341.51	2387.81	1241.9	1837.96	1952.74	1852.93	1852.82	1854.6	1303.63	2143.97	1899.53	2807.49	1393.74	1123.67	1592.09	1436.68	1787.86	1486.93		1666.78	1153.84	1090.2	1133.09	3682.58	1449.35	1594.27	1386.9	774.88		1143.34	1478.35	1313.29	1252.86	1251.6	1024.79		1028.02	1600.75	1518.05	3131.92	1152.73	904.985
2188.57	2996.91	1777.18	1477.72	1920.28	2978.64	2729.27	3094.51	2365.52	2397.57	1220.98	1827.84	1937.32	1853.97	1839.47	1802.67	1307.26	2115.26	1880.46	2786.05	1404.69	1115.37	1585.27	1447.64	1762.47	1488.58		1686.05	1138.01	1098.41	1135.38	3684.54	1442.19	1586.48	1359.36	774.552		1132.55	1471.09	1339.5	1235.84	1252.98	1034.77		1015.09	1606.56	1516.71	3114.69	1157	916.484
2178.17	2989.47	1829.37	1442.42	1952.03	2997.16	2744.69	3098.83	2323.08	2371.88	1231.48	1835.24	1910.8	1839.26	1832.89	1767.08	1304.01	2097.71	1895.37	2810.88	1398.56	1118.69	1593.29	1460.45	1786.7	1471.52		1695.09	1122.28	1101.53	1127.04	3694.93	1434.48	1596.28	1367.04	769.652		1130.73	1469.42	1337.15	1236.04	1266.64	1021.94		1019.75	1600.34	1507.66	3113.26	1176.31	912.631
2205.3	3009.45	1669.94	1364.06	1885.52	3007.3	2696.01	3057.87	2326.84	2347.95	1217.29	1831.39	1942.33	1834.44	1843.66	1642.97	1285.08	2101.46	1873.02	2832.22	1410.05	1104.98	1599.25	1463.08	1780.49	1455.8		1674	1119.32	1092.6	1117.77	3700.69	1444.69	1584	1351.04	755.335		1118.5	1475.53	1331.53	1223.43	1253.71	1025.07		1029.05	1610.65	1509.68	3117.19	1178.08	904.935
2242.87	3001.94	1804.83	1384.73	1887.04	3019.43	2694.75	3079.92	2348	2332.37	1204.71	1805.55	1921.7	1869.62	1845.66	1626.05	1286.82	2082.39	1863.08	2792.04	1390.16	1126.42	1594.51	1451.86	1760.56	1447.6		1663.03	1108.51	1098.62	1107.2	3695.74	1445.01	1588.99	1362.27	764.791		1113.04	1480.38	1332.86	1222.83	1261.54	1002.49		1028.28	1603.08	1511.32	3097.27	1188.08	910.71
2164.51	2948.92	1771.38	1388.15	1934.17	3055.48	2680.02	3071	2357.65	2329.85	1196.55	1825.61	1952.86	1840.42	1851.74	1790.18	1293.8	2053.86	1843.54	2798.53	1422.79	1122.78	1581.74	1453.07	1758.71	1430.03		1691.12	1105.06	1108.67	1112.21	3683.04	1448.57	1590.47	1346.44	772.844		1102.52	1474.39	1330.49	1227.25	1249.68	1001.21		1018.59	1586.22	1510.27	3102.91	1181.4	908.998
2195.3	2967.49	1713.37	1315.63	1923.73	3049.97	2694.31	3041.65	2368.35	2333.03	1194.68	1817.57	1942.43	1837.52	1859.47	1878.1	1304.29	2085.99	1835.64	2770.47	1436.59	1120.61	1594.74	1450.21	1718.24	1433.71		1686.19	1104.34	1108.89	1104.69	3675.96	1447.81	1583.77	1345.57	759.717		1103.03	1476.06	1322.65	1235.56	1259.27	992.891		1039.44	1598.13	1503.34	3069.39	1200.66	906.562
2176.1	2996.89	1925.74	1397.15	1886.99	3030.94	2699.33	3046.55	2398.72	2323.43	1188.86	1817.35	1990.03	1845.67	1854.71	1824.56	1299.82	2041.48	1824.21	2784.93	1400.04	1100.8	1595.68	1469.08	1744.52	1414.57		1669.95	1099.25	1099.28	1088.56	3668.12	1452.94	1594.66	1346.32	748.334		1095.28	1474.59	1322.5	1217.88	1250.43	995.442		1036.8	1578.56	1501.04	3050.15	1189.33	901.91
2206.48	2953.06	1821.89	1488.6	1946.15	3067.61	2667	3023.64	2370.91	2323.91	1213.44	1800.31	1956.78	1849.02	1868.91	1752.97	1269.62	2038.5	1827.9	2768.36	1426.58		1577.94	1464.66	1724.53	1411.88		1671.86	1080.15	1102.49	1094.46	3673.18	1454.45	1601.45	1341.66	759.697		1092.5	1462.86	1328.08	1205.65	1267.38	994.408		1033.24	1560.64	1495.92	3038.27	1214.02	896.803
2171.05	2939.52	1770.98	1518.12	1927.64	3050.65	2741.54	3034.31	2402.34	2319.75	1218.46	1796.15	1963.05	1842.84	1858.51	1984.83	1281.9	2054.61	1832.26	2808.56	1443.44		1586.35	1463.36	1737.58	1417.81		1683.18	1079.32	1105.82	1100.14	3649.82	1463.13	1602.39	1342.93	775.638		1089.48	1457.28	1318.17	1205.32	1253.25	982.32		1045.77	1566.06	1498.21	3020.55	1204.24	898.609
2229.09	2930.43	1805.39	1286.51	1868.97	3096.98	2710.65	3018.78	2454.4	2327.34	1200.68	1798.51	1926.67	1856.68	1876.89	1901.29	1310.4	2055.1	1823.25	2864.59	1448.53		1575.34	1462.97	1715.05	1398.66		1691.09	1047.59	1111.13	1087.06	3636.07	1463.12	1607.86	1343.38	753.293		1077.79	1466.55	1336.68	1205.48	1253.89	982.587		1041.84	1563.34	1498.42	3008.19	1216.49	885.939
2205.08	2935.99	1768.84	1484.36	1978.92	3027.38	2787.63	3010.96	2420.43	2297.36	1196.27	1775.26	2031.51	1852.19	1883.55	1910.85	1282.56	2051.61	1806.77	2802.01	1463.99		1572.67	1456.64	1698.37	1405.6		1682.74	1045.3	1109.29	1093.36	3629.05	1468.4	1602.09	1340.57	762.308		1071.23	1468.93	1318.81	1201	1239.09	979.497		1038.82	1575	1497.26	2970.18	1211.08	894.361
2185.47	2879.23	1845.59	1536.27	1968.97	3057.44	2746.12	3011.08	2441.38	2332.61	1178.51	1797.1	1963.4	1830.53	1889.64	1818.31	1318.83	2018.79	1815.64	2819.27	1461.85		1585.97	1458.02	1706.73	1387.38		1693.76	1024.83	1110.58	1082.07	3629.44	1471.97	1585.82	1337	763.759		1060.55	1480.34	1330.18	1185.81	1237.86	964.078		1047.16	1582.32	1495.08	2950.93	1215.32	896.013
2197.86	2922.53	1702.17	1562.18	2041.95	3041.78	2769.68	2991.42	2456.47	2345.08	1201.1	1800.63	1969.43	1851.2	1880.27	1880.92	1298.95	2029.71	1805.98	2806.23	1429.35		1559.13	1469.14	1705.18	1387.06		1699.31	1037.61	1105.57	1081.77	3626.07	1463.42	1591.87	1341.82	762.957		1054.33	1458.87	1331.66	1205.13	1238	971.555		1050.51	1572.85	1483.26	2927.8	1220.51	884.651
2156.37	2950.69	1795.14	1472.05	2047.26	3070.74	2765.12	2964.97	2416.63	2333.68	1191.41	1776.6	1971.7	1874.87	1899.68	1927.26	1309.99	2008.16	1819.47	2766.74	1460.69		1560.08		1711.79	1377.93		1701.27	1006.56	1101.33	1084.86	3610.85	1480.54	1575.59	1339.02	766.027		1050.39	1467.04	1335.82	1190.19	1249.75	934.206		1055.41	1570.36	1487.46	2914.03	1221.23	891.622
2176.35	2939.07	1802.98	1421.41	2087.67	3062	2770.68	3038.95	2471.56	2354.86	1176.51	1778.43	1987.89	1879.16	1905.58	1940.88	1300.28	2028.73	1844.09	2787.38	1433.19		1563.95		1683.39	1375.37		1706.36	1013.41	1110.32	1070.08	3599.48	1472.11	1580.56	1336.16	766.605		1024.28	1459.86	1336.07	1190.99	1251.95	929.908		1064.3	1577.74	1479.63	2894.64	1222.33	880.515
2174.24	2906.05	1824.7	1440.32	1955.35	3011.12	2766.94	2995.76	2490.85	2348	1167	1770.84	2034.28	1866.79	1884.92	1898.92	1296.39	2056.01	1813.19	2778.5	1466.23		1560.17		1669.41	1391.64		1698.58	1003.83	1110.19	1070.06	3601.47	1481.43	1588.14	1340.57	761.698		1034.27	1457.18	1342.22	1198.01	1251.63	934.942		1069.22	1572.05	1483.44	2887.71	1215.96	872.943
2302.3	2878.83	1811	1515.27	1906.27	2983.57	2734.54	2970.35	2456.9	2352.16	1197.8	1735.71	1977.74	1840.75	1935.38	1849.63	1297.29	2044.77	1827.35	2798.55	1464.73		1549.58		1644.58	1379.98		1719.64	993.816	1109.19	1059.8	3584.66	1474.32	1585.48	1340.67	754.213		1010.81	1479.86	1335.16	1169.19	1255.04	929.75		1069.65	1578.2	1476.65	2882.87	1214.92	871.547
2224.27	2886.08	1804.98	1505.52	1891.05	3004.73	2792.98	3029.71	2503.26	2343.45	1181.05	1761.99	2002.51	1864.37	1900.93	1823.32	1282.96	2046.68	1845.82	2820.81	1467.1		1562.26		1642.22	1356.65		1732.56	999.02	1103.01	1062.88	3582.96	1473.06	1593.54	1342.17	760.467		1010.23	1469.52	1338.02	1163.25	1254.09	915.882		1067.49	1575.04	1486.89	2868.48	1212.93	870.414
2200.46	2906.13	1747.58	1423.3	1926.09	3009.79	2778.12	2969.78	2465.65	2361.73	1166.06	1761.01	2007.62	1848.52	1907.33	1917.37	1302.45	2059.64	1827.52	2836.01	1461.83		1567.65		1645.06	1358.93		1703.55	1000.41	1109.62	1054.88	3574.4	1486.09	1592.57	1351.13	762.216		1004.43	1469.76	1332.52	1174.77	1253.78	915.507		1074.18	1583.69	1480.9	2863.15		865.206
2276.31	2980.7	1713.59	1349.45	2029	3036.94	2793.96	3032.71	2484.75	2358.26	1166.47	1768.31	1953.54	1843.12	1917.11	1935.4	1278.99	2074.51	1827.56	2868.2	1499.36		1552.89		1673.62	1364.76		1684.84	1003.61	1109.73	1057.61	3573.36	1486.37	1600.06	1321.95	757.56		1009.45	1450.08	1333.48	1159.78	1260.41	906.02		1060.52	1578.09	1483.55	2844.22		857.258
2181.85	2933.11	1973.94	1433.11	1910.17	3082.88	2820.09	3040.31	2483.77	2353.74	1169.43	1750.02	1988.2	1870.48	1901.91	1928.14	1271.77	2047.7	1821.98	2856.03	1484.46				1664.45	1359.26		1696.97	1018.91	1110	1051.93	3538.94	1498.37		1341.28	766.706		1002.08	1452.02	1321.87	1170.25		907.16		1049.75	1587.65	1476.6	2837.81		873.063
2233.82	2902.17	1978.38	1428.72	1903.09	3044.28	2801.35	3033.59	2482.16	2355.69	1164.1	1755.2	2034.47	1883.19	1937.92	1905.44	1289.12	2063.1	1817.41	2894.28	1472.03				1653.47	1370.06		1704.86	1000.29	1119.44	1063.2	3544.81	1500.12		1354.28	761.421		995.893	1458.61	1331.2	1178.89		911.652		1070.8	1580.14	1483.16	2853.71		862.504
2225.69	2941.89	1978.69	1265.06	1920.99	3018.55	2814.27	3005.1	2475.26	2341.03	1174	1753.96	2007.84	1876.35	1940.53	1891.21	1315.75	2069.71	1815.13	2794.77	1496.31				1642.28	1360.25		1712.95	996.723	1116.73	1053.42	3553.48	1489.75		1332.56	768.777		986.723	1449.03	1325.34	1170.31		904.9		1066.62	1585.08	1480.4	2859.48		855.794
2192.16	2985.95	1725.88	1399.52	1885.04	3038.05	2745.61	3018.18	2494.99	2388.52	1178.2	1766.77	2046.79	1860.96	1943.32	1938.99	1292.63	2076.78	1828.53	2824.89	1479.3				1626.09	1359.25			1002.46	1116.01	1064.82	3549.1	1501.62		1342.92	766.604		1036.79	1449.41	1337.02	1166.25		906.826		1066.69		1478.65	2836.72		862.692
2245.55	2898.26	2036.69	1408.39	1962.79	3030.93	2797.08	3043.1	2465.12	2381.98	1180.1	1763.71	2010.33	1875.83	1931.08	1935.03	1282.21	2067.04	1815.86	2798.98	1496.94				1616.75				996.745	1109.16	1037.58	3537.62	1508.98		1344.29	763.43		1037.44	1447.23	1348.56	1157.72		901.171		1067.98		1494.24	2829.88		860.191
2224.62	2846.61	1926.17	1349.57	1991.89	3080.15	2838.96	3004.25	2520.48	2380.76	1193.39	1745.49	2006.59	1898.58	1937.82	2001.64	1285.25	2080.03	1830.13	2764.28	1522.3				1630.34				990.534	1097.93	1040.31	3556.09	1502.91		1347.93	759.608		1023.85	1451.22	1332.69	1166.59		890.368		1063.06		1482.81	2834.65		857.416
2250.49	2903.21	1915.34	1355.82	1896.12	3097.93	2758.85	3015.07	2477.31	2378.99	1211.24	1747.6	2038.01	1869.94	1927.32	1981.52	1323.19	2084.61	1821.11	2789.12	1483.55				1565.07				994.957	1103.51	1035.87		1510.65		1334.93	760.516		1026.84	1439.87	1334.28	1177.3		894.013		1057.59		1475.72	2821.87		858.86
2286.52	3001.34	1820.94	1388.78	1868.02	3088.77	2782.13	3027.41	2426.17	2407	1191.17	1737.45	2027.06	1898.91	1947.18	1821.29	1291.35	2075.33	1848.31	2839.69	1532.6				1547.9				981.233	1099.82	1033.58		1515.99		1349.72	748.656		1012.55	1442.46	1326.84	1176.28		892.254		1071.05		1496.91	2846.1		859.341
	2906.1	1812.95	1531.59	1990.29	3106.05	2808.3	3036.27	2495.19	2377.2	1201.15	1746.33		1863.1	1957.21	1936.62	1333.99	2114.91	1806.15	2757.84	1529.03				1546.22				980.373	1123.17	1039.81		1509.68		1347.16	763.955		1023.17	1453.75	1336.41	1153.26		890.634		1055.93		1490.31	2837.78		851.001
	2893.98	1796.93	1493.68	1846.51	3112.72	2845.31	3066.39	2504.03	2384.18	1203.2	1754.73		1892.1	1967.06	1892.82	1347.03	2085.41	1842.05	2842.51	1552.09								994.377	1116.15	1029.52		1504.4			771.947		1033.79	1447.9	1339.53	1170.47		880.159		1076.19			2843.61		868.437
	2959.89	1928.01	1533.61	2081.72	3062.81	2780.67	2991.59	2462.27	2400.74	1231.85	1766.56		1858.33	1968.35	1942.09	1337.66	2122.5	1834.02	2752.39	1512.93									1116.2	1039.12		1505.12			766.692		1019.25	1450.18	1321.94	1161.26		887.591		1063.05			2830.35
	2933.01	1885.55	1469.76	1984.86	3056.68	2825.48	3035.88	2538.21	2415.13	1212.56	1733.47		1869.27	1969.37	1979.67	1334.94	2097.22	1835.48	2836.67	1529.19									1105.82	1032.7					764.48		1034.65	1441.17		1162.04		894.139		1055.73			2836.29
	2912.36	1819.05	1412.98	1874.06	3114.77	2776.92	3040.93	2442.96	2410.29	1226.08	1749.06		1882.12	1952.17	2009.32	1352.42	2132.71	1858.64	2782.9	1544.64										1036.47					765.074		1031.12	1446.24		1163.74		891.743		1063.32			2843.4
	2930.73	2004.79	1390.17	2128.26	3142.55	2842.06	3013.09	2498.22	2388.65	1220.35	1727.26			1955.15	2100.89	1345.88	2138.05	1860.26	2836.23	1552.04										1031.41					767.359		1023.25	1447.85		1159		887.914		1053.66			2832.22
	2965.25		1464.27	1953.67	3092.48	2771.35	3044.83	2517.43	2434.22	1199.92	1731.3					1322.35	2184.1	1868.48	2865.48											1039.47							1006.19			1166.26		871.487		1056.64			2828.4
	2851.07		1363.01	1971.8	3225.67	2890.67	3031.24	2518.13		1223.59	1713.68						2149.86	1848.68	2842.3											1046.58										1170.85							2820.34
	2938.4		1385.57	1989.09	3101.56	2849.23	3064.44			1219.47								1873.95	2884.27																					1162.88							2821.02
	2934.9			1886.45	3079.4	2842.84	3024.78			1202.89									2843.41																					1166.63							2840.36
	2938.56				3078.88	2842.4	3059.99			1181.31									2827.36																												2831.8
[truncated: 100 more columns]

## Sheet: EIPA area
1	1	1	1	1	1	6	6	6	6	6	5	5	5	5	5	5	5	5	5	5	5	1	1	1	3	3	3	3	3	4	4	4	4	4	5	5	5	5	5	6	6	6	7	7	7	7	7	7	7
1	2	3	4	6	7	1	2	3	4	6	1	2	3	4	5	9	10	11	12	14	15	2	3	4	3	7	8	9	11	3	5	9	10	17	3	4	6	9	10	3	5	6	2	5	7	8	9	10	11
9.673	22.049	27.77	21.113	17.785	28.602	32.866	50.755	25.17	15.705	27.874	5.928	22.881	5.928	9.257	38.274	31.722	5.928	48.571	106.19	13.105	7.904	9.361	26.522	21.009	10.505	16.641	6.032	13.937	20.593	14.561	11.649	16.537	17.369	30.37	2.288	20.281	13.417	8.425	4.264	13.001	22.361	17.681	5.096	14.249	7.592	9.361	6.656	8.737	7.904
	60.532	60.428	54.291	60.532	46.491	64.172	77.069	69.58	34.634	34.738		38.482		45.659	61.884	75.717		92.254		24.857	32.762	13.521	41.915	58.868	41.602	41.29	25.066	52.419	36.506	36.402	29.226	34.842	81.541	82.061	9.465		40.042	29.746	17.889	29.538	33.49	42.019	30.89	28.914	23.401	16.641	24.649	19.137	25.378
53.147				61.364	57.411	106.086		106.502		52.835	23.193	101.718	13.521		90.589	108.687	28.498		195.012	33.906		45.347		68.644	74.364	54.707	61.884	97.142	46.387	42.123	56.787	58.243	116.071	125.432	16.017	84.661	42.019	35.57	27.146	60.012	49.923	63.86	46.179	42.747	54.291	33.282	34.426	50.963	36.818
	103.486	117.423	130.736	96.726			118.983		67.812	69.892	33.49	160.274	43.059	52.835	163.914	128.968		117.319				88.925	75.405	119.503	77.069	72.492	96.622		66.772	47.219	94.854	86.429	134.376	179.931	24.753		68.228	65.836	38.378	107.022	49.715	95.998		45.867	81.541	46.491	55.643	158.61	43.579
87.053		151.953		121.271	96.518	230.894		138.016		127.096				104.006	191.788	148.209	60.74		303.386	73.844	124.808	116.799		271.248	93.71	148.937	115.655			62.716	123.767	104.11	139.784		41.29	127.096		99.222	48.155	138.12		160.69		60.22	155.801	61.468	75.405		61.156
	171.298		152.473	172.754			164.538		70.828		56.059	277.281	68.748		229.542	190.747		139.472				199.172			216.541	168.906		135.208	89.965	75.301	156.113	172.442			45.971		81.541		85.077	172.962	90.693	167.866	49.403	65.42	228.502	74.156	157.569	203.02	100.99
147.897	213.941	210.717			129.696	231.518		185.027	99.118			316.907		183.571			84.037		378.167	134.792	137.288	222.469		240.254					162.146	81.333	151.121		180.659			156.113	173.066	142.593		196.364			61.26	68.644		105.878	166.098
	274.681		211.237				228.502		185.339	219.453	76.861					242.543		198.756									188.147	166.514				196.364		235.99			218.933		101.926		101.614	184.403	142.385	62.092		125.328	210.093		141.344
208.013				211.237	209.573			211.445				406.248	161.21				104.838			187.003	179.515	226.838				196.364				101.614			231.622		57.619	281.129		167.554		230.686			156.841	86.013	254.087	126.68		247.015
	281.961	254.919			220.389	263.448	251.799			225.798				203.852	362.878			268.024	552.585				106.606	278.633				184.819	175.147	104.942	193.764			312.227	101.51		235.782	198.34	128.344		110.871					144.985	285.497
				250.343					177.643		118.047		211.133			344.365				198.548	246.911	303.282	95.166		286.121	238.694	253.567				224.549	203.02	265.32		166.514	295.69				277.905		196.156	166.618	161.106		202.396			166.202
	386.383				209.365		305.362	235.574		279.569							196.364							341.973		229.022				152.265							254.399				129.8
			286.225															324.604					212.173						207.908						176.291			245.143						180.347			310.563
263.032				350.605							134.168	589.715	281.649								322.419	335.42		370.366			319.299			161.314	353.517	281.545								315.971	203.436		212.381		296.418				203.228
	460.748	369.95			251.695	373.59	360.694			379.207				372.342	572.866				786.495	259.6					332.924			221.013							199.796			217.685	173.066							229.646	322.107
									241.503		236.926					393.144																				349.357	290.281				242.543	212.277		207.596					218.621
								376.607			252.631						260.952					352.061	232.038							232.87	406.456												194.388				332.82
			361.006															383.471																420.705							272.08
392.312				479.157								690.185	431.834								449.723																			355.285								376.399
	671.984				465.22	554.977	527.416			531.576									1066.38					462.724																						294.442	348.837
																												300.474					490.285								339.788								246.807
											328.348											413.217										355.077
																													303.49
													473.644										255.647				520.551
		605.732												720.347	901.318					499.542					501.726										271.976			276.449
									512.751							573.178																					421.121					282.793		222.885
								707.555			383.159						523.047													285.081	440.882								300.37						417.793
			379.623															605.316
569.538				588.467								960.186									636.518																			483.109
	886.341				658.048	719.723	868.972			713.275									1528.37					559.45																							550.609
																						531.368						393.768													458.148								350.293
																																448.787
																													330.948
													654.407														509.527
		769.23												871.156	1025.5					630.382			308.483
									615.301							653.367
								859.196			478.637						713.899													357.99	660.44				312.227
			508.279															760.702
624.246				724.092								1237.36																												633.502
	978.699				877.189		1189.41			880.725									1954.38																												812.809	649.831
																												490.597
																						610.621										518.575	504.638								540.728
																													399.384
													719.827
		732.932												1062.84	1119.73					760.078							559.242																		616.341
									696.946							710.051									668.864
								1043.7			639.118						813.953
			533.656															864.5													804.384
				753.317																																				702.978
733.036	1323.27				989.307		1329.93			925.656		1424.05							2327.56
																								1091.65										748.741												546.657
																												613.013																					470.836
																																526.272							356.117
																													530.224
													876.877
		781.607												1261.6	1206.47					884.885															452.739			478.429
									745.205							685.505																					634.958					501.622		275.617
								1142.51			921.599						984.315													425.386
			608.333															950.201
				956.233																																				661.272
	1229.77				1177.77	976.723	1450.68			1089.67									2556.89																												1061.8
[truncated: 26 more columns]

## Sheet: EIPA+Y-27 V
1	2	2	2	3	3	4	4	5	5	5	5	6	6	6	6	7	7	7	7	9	9	9	10	10	10	11	11	11	11	12	13	1	1	1	1	4	4	4	4	4	4	3	3	3	3	3	3	4	4
2	1	3	6	6	7	8	10	3	5	8	9	2	3	4	7	2	5	6	7	1	3	6	1	4	6	3	5	8	14	1	7	2	3	4	5	1	2	3	4	6	7	1	2	3	5	6	8	1	3
1534	1094.75	1661.68	1263.78	883.934	2221.78	1452.44	898.625	1051.96	675.375	2056.84	1228.12	1051.74	3584.7	2196.4	2079.83	2195.77	1377.99	1768.4	1855.53	1105.39	1208.06	596.696	1018.16	2615.91	1042.39	1288.93	1479.42	1487.61	2526.14	1148.2	1742.76	2265.49	1876.96	1521.97	1334.94	1472.64	2107.54	1827.19	1992.7	2601.71	2272.12	2298	3387.25	1051.17	1482.84	2518.78	3023.15	1792.42	1826.74
1498.31	1106.97	1651.42	1271.95	901.013	2275.43	1439	892.614	1112.83	694.045	2036.85	1232.35	1063.15	3610.61	2169.26	2088.93	2198.89	1366.72	1789.52	1875.76	1118.19	1219.44	596.068	1018.27	2635.17	1043.64	1298.95	1508.36	1483.09	2523.22	1166.92	1748.54	2245.68	1893.75	1561.89	1356.11	1438.89	2117.45	1850.33	2006.93	2597.4	2310.92	2268.08	3374.82	1048.18	1491.35	2536.69	3075.15	1795.66	1808.11
1482.72	1113.1	1662.13	1285.42	896.519	2258.42	1442.87	895.885	1082.33	693.663	2044.79	1232.76	1073.25	3634.71	2153.88	2099.89	2217.94	1374.09	1784.47	1866.85	1119.38	1232.92	623.684	1016.28	2653.55	1071.91	1313.74	1507.23	1485.69	2530.75	1168.4	1775.68	2263.93	1914.24	1560.97	1357.26	1474.11	2132.51	1854.07	2003.01	2574.01	2273.4	2305.19	3376.01	1054.49	1471.7	2544.48	3156.18	1818	1836.24
1488.79	1108.81	1667.19	1307.03	904.747	2267.12	1451.38	903.996	1094.27	700.3	2028.67	1230.97	1087.91	3663.46	2137.84	2122.89	2200.91	1387.87	1796.05	1869.89	1136.68	1249.44	615.333	1020.89	2652.58	1079.61	1323	1496.8	1502.18	2530.95	1182.3	1747.91	2264.41	1905.16	1545.94	1355.83	1459.6	2138.11	1897.3	2025.02	2603.81	2265.38	2282.95	3368.21	1055.52	1458.04	2556.03	3188.94	1800.33	1800.41
1522.88	1109.4	1672.27	1297.95	915.756	2261.57	1445.62	900.503	1099	705.895	2037.56	1242.59	1093.52	3680.1	2119.61	2099.98	2197.71	1391.75	1812.72	1892.64	1141.17	1254.32	618.435	1024.8	2661.39	1086.59	1332.13	1502.74	1518.94	2528.05	1183.73	1760.1	2251.33	1891.68	1528.94	1377.63	1426.05	2129.9	1851.34	2011.6	2587.43	2264.59	2293.24	3389.08	1054.03	1456.07	2541.21	3232.33	1833.35	1770.15
1536.54	1116.98	1667.34	1309.77	912.719	2265.49	1457.38	910.967	1097.49	697.796	2045.45	1240.48	1103.31	3685.77	2087.7	2118.73	2222.05	1372.61	1818.9	1861.17	1138.56	1274.23	626.473	1018.42	2651.23	1104.88	1339.51	1505.68	1527.05	2535.64	1183.7	1743.7	2251.72	1880.46	1577.12	1375.92	1441.07	2114.57	1795.96	2016.71	2606.53	2291.44	2277.83	3398.67	1058.05	1440.76	2530.7	3267.98	1830.18	1792.78
1549.01	1130.3	1693.26	1327.57	930.602	2260.54	1459.87	918.641	1116.14	730.795	2057.3	1238.86	1090.37	3723.82	2066.17	2119.77	2226.54	1376.87	1831.46	1871.75	1156.61	1271.67	634.165	1021.71	2675.27	1115.92	1349.94	1514.29	1523.65	2531.25	1197.38	1747.49	2227.38	1871.76	1567.51	1380.54	1417.08	2129.37	1794.03	2015.52	2623.42	2273.53	2302.26	3431.08	1053.8	1432.23	2493.05	3330.31	1799.54	1790.06
1547.7	1130.72	1688.65	1328.52	949.552	2304.08	1455.07	929.824	1113.27	700.626	2071.07	1256.51	1101.24	3730.44	2054.95	2126.3	2231.33	1391.78	1832.88	1872.46	1162.48	1286.6	636.57	1016.81	2668.03	1117.85	1347.42	1499.3	1525.97	2550.83	1196.7	1743.08	2273.96	1855.22	1549.73	1351.45	1450.66	2074.07	1799.1	2020.89	2616.97	2261.94	2266.95	3435.51	1046.17	1419.08	2464.99	3298.82	1793.56	1785.01
1565.66	1126.13	1714.05	1356.99	926.959	2313.84	1461.58	935.991	1127.71	696.084	2082.18	1248.84	1106.03	3745.91	2031.09	2123.17	2234.5	1389.32	1834.38	1868.85	1169.32	1304.19	632.874	1021.94	2704.71	1116.09	1351.2	1491.55	1522.46	2549.69	1216.09	1763.69	2236.04	1849.48	1571.29	1338.74	1459.7	2068.05	1794.46	1999.9	2588.87	2276.84	2249.32	3461.82	1040.32	1432.79	2478.27	3314.59	1812.65	1778.23
1585.74	1119.38	1714.48	1348.29	934.303	2304.57	1451.02	947.759	1118.34	712.376	2100.55	1251.24	1109.67	3766.61	2035.63	2132.87	2235.46	1398.99	1854.73	1868.04	1178.5	1295.25	651.06	1019.73	2713.55	1115.49	1365.51	1488.06	1540.09	2571.36	1218.57	1774.43	2202.65	1821.89	1548.49	1320.21	1456.18	2051	1769.16	1994.54	2581.49	2252.93	2234.19	3458.02	1026.96	1395.15	2469.88	3323.8	1780.69	1763.17
1597.33	1123.27	1696.35	1358.51	941.713	2339.1	1458.02	953.982	1112.2	709.071	2122.17	1261.74	1128.26	3785.17	2025.8	2111.04	2218.92	1404.38	1847.46	1873.82	1222.87	1330.61	660.76	1034.71	2739.43	1115.45	1363.33	1489.02	1546.18	2579.88	1210.27	1774.29	2231.39	1848.56	1539.4	1299.73	1482.91	2041.3	1771.45	1946.52	2564.36	2246.83	2218.36	3457.28	1021.04	1401.21	2438.76	3365.15	1823.65	1763.69
1612.74	1121.14	1726.34	1338.16	954.231	2338.05	1443.95	955.813	1132.06	711.101	2128.1	1258.58	1132.5	3794.88	2010.98	2110.77	2221.2	1421.77	1860.95	1871.27	1240.58	1335.48	653.624	1014.65	2734.25	1111.58	1360.35	1494.61	1557.43	2568.37	1213.62	1799.57	2183.79	1809.83	1531.69	1299.43	1514.49	2020.6	1783.01	1965.83	2564.18	2251.54	2175.71	3444.85	1015.22	1428.78	2449.71	3372.26	1834.75	1755.24
1585.33	1119.4	1726.52	1349.24	954.367	2356.24	1460.65	980.085	1126.71	718.426	2141.16	1259.95	1130.31	3817.01	2020.84	2114.48	2242.25	1414.08	1859.4	1854.35	1233.14	1349.81	663.109	1018.15	2740.21	1101.28	1372.54	1496.15	1546.37	2593.95	1215.21	1786.62	2202.78	1829.38	1537.94	1291.74	1490.2	2016.59	1775.33	1979.88	2572.05	2269.64	2190.34	3442.58	1023.66	1416.19	2420.51	3389.48	1822.26	1734.71
1594.35	1132.93	1711.16	1342.82	957.774	2373.24	1466.8	983.499	1128.5	706.916	2168.75	1261.67	1138.42	3841.04	2010.24	2112.78	2239.01	1430.56	1873.73	1844.95	1232.87	1362.18	662.174	1019.26	2758.17	1117.31	1361.33	1504.01	1558.19	2606.73	1224.58	1778.16	2192.42	1784.36	1554.18	1279.33	1493.2	1977.78	1761.1	1958.26	2556.44	2274.26	2203.37	3436.09	1017.16	1396.36	2427.91	3403.73	1815.87	1761.75
1600.14	1129.76	1715.53	1334.3	954.303	2365.39	1466.38	986.478	1122.24	717.908	2183.17	1271.01	1144.92	3862.67	2006.42	2110.51	2239.49	1432.84	1869.08	1857.05	1237.28	1378.09	661.926	1018.43	2741.61	1115.72	1367.28	1487.96	1555.54	2622.21	1230.28	1792.38	2152.61	1788.51	1534.92	1279.83	1511.2	1959.27	1745.07	1929.51	2567.55	2276.93	2212.45	3450.9	1005.22	1385.57	2421.87	3364.57	1805.95	1737.89
1597.68	1128.21	1704.69	1323.6	961.941	2371.66	1459.65	999.362	1124.03	720.99	2200.91	1261.47	1151.05	3896.38	1991.37	2108.86	2248.7	1427.16	1863.54	1871.36	1252.75	1383.1	666.574	1017.5	2767.86	1120.88	1377.09	1482.42	1565.42	2622.43	1241.25	1787.84	2186.28	1817.04	1542.98	1266.59	1523.38	1989.16	1745.43	1980.39	2537.52	2277.1	2190.77	3410.37	1003.08	1401.38	2433.15	3374.92	1810.73	1754.82
1598.69	1128.56	1723.01	1317.95	966.417	2380.97	1451.91	1004.72	1127.9	727.321	2216.44	1258.6	1139.14	3892.87	1987	2116.95	2253.08	1447.53	1865.1	1872.63	1257.87	1373.78	676.155	1009.36	2763.48	1124.49	1376.21	1490.14	1569.18	2638.63	1246.2	1794.34	2213.67	1812.83	1555.07	1261.23	1516.32	1968.24	1775.38	1963.91	2566.7	2281.82	2164.06	3430.88	1007.13	1392.47	2459.13	3391.16	1807.38	1779.82
1595.74	1127.41	1733.21	1313.77	973.339	2377.72	1447.91	1006	1136.96	720.05	2221.03	1253.46	1152.22	3913.84	1972.03	2127.43	2251.32	1433.04	1865.87	1874.37	1261.96	1373.88	679.999	995.942	2776.45	1121.47	1386.96	1485.99	1555.07	2647.68	1241.55	1804.57	2163.32	1768.84	1534.18	1273.63	1484.25	1953.03	1738.72	1953	2542.25	2306.8	2190.56	3406.01	992.708	1393.05	2399.85	3355.13	1835.95	1777.89
1608.44	1151.16	1723.35	1302.58	964.029	2382.8	1455.91	1019.19	1136.68	718.038	2235.98	1267.76	1146.5	3944.13	1958.43	2119.3	2254.9	1469.01	1879.81	1882.46	1261.44	1366.44	679.389	996.247	2774.08	1140.39	1393.55	1476.76	1553.59	2650.27	1236.61	1800.1	2190.74	1771.89	1556.88	1240.58	1524.87	1957.4	1775.33	1931.13	2546.27	2287.51	2134.75	3391.32	986.895	1383.92	2406.34	3368.7	1805.68	1755.99
1628.78	1141.51	1730.54	1309.16	972.444	2387.68	1448.62	1022.53	1130.56	728.167	2201.35	1257.23	1147.57	3933.1	1952.9	2123.77	2263.63	1448.86	1867.81	1867.45	1263.6	1365.41	673.47	985.744	2774.22	1133.47	1390.71	1492.29	1562.55	2673.42	1239.35	1804.34	2206.64	1788.03	1572.04	1234.15	1515.52	1994.37	1749.46	1955.3	2527.34	2314.42	2183.29	3407.92	998.263	1407.29	2394.46	3390.53	1811.93	1758.7
1631.61	1155.57	1736.3	1294.16	977.784	2409.95	1462.24	1029.98	1130.64	732.283	2222.44	1273.15	1147.84	3950.09	1962.05	2112.62	2256.01	1455.43	1877.92	1860.65	1264.64	1352.36	669.348	976.705	2784.77	1127.46	1399.08	1498.54	1547.91	2691.68	1252.91	1820.25	2197.81	1776.85	1545.3	1256.89	1493.57	1973.79	1772.15	1930.07	2545.08	2309.91	2122.66	3335.67	990.62	1386.16	2415.9	3355.3	1787.67	1744.45
1642.92	1145.91	1726.57	1302.96	980.226	2418.78	1447.45	1037.03	1129.31	741.237	2227.22	1262.43	1154.96	3954.88	1954.38	2121.67	2265.37	1459.04	1866.41	1858.5	1261.71	1339.71	664.585	973.575	2787.31	1122.7	1397.26	1498.81	1545.48	2692.09	1243.62	1819.87	2186.1	1810.66	1521.88	1258.26	1527.11	1990.41	1741.17	1956.63	2498.55	2293.86	2125.38	3351.61	1002.34	1412.72	2401.17	3382.25	1804.71	1734.92
1661.13	1144.95	1738.42	1295.09	976.433	2418.01	1443.43	1034.18	1143.67	739.873	2261.67	1262.91	1156.31	3961.04	1957.22	2118.81	2257.71	1453.66	1886.11	1849.51	1265.46	1346.2	673.853	969.554	2788.24	1129.33	1404.94	1490.78	1544.33	2693.58	1249.95	1819.16	2203.84	1771.5	1556.45	1220.32	1527.08	2003.7	1758.2	1974.9	2518.9	2341.2	2120.06	3345.56	998.477	1404.72	2412.11	3400.73	1795.85	1744.83
1648.08	1147.33	1756.41	1298.4	992.144	2440.44	1436.65	1050.16	1145.37	755.698	2251.53	1267.56	1164.4	3984.54	1944.61	2107.67	2253.83	1460.99	1884.51	1826.86	1254.69	1344.54	663.84	979.333	2781.69	1126.62	1423.55	1511.12	1536.26	2697.52	1263.1	1807.88	2225.85	1774.39	1535.3	1223.82	1507.06	1980.69	1761.72	1942.37	2532.94	2319.43	2093.18	3383.18	992	1420.93	2361.03	3379.41	1822.02	1752.55
1644.86	1156.91	1755.04	1287.66	985.013	2424.63	1442.45	1046.97	1139.51	761.564	2251.9	1277.01	1163.06	3961.12	1948.47	2113.78	2245.98	1453.32	1895.14	1823.87	1258.24	1350.2	684.966	961.34	2805.61	1132.47	1437.76	1492.32	1542.03	2719.6	1258.52	1810.01	2204.36	1789.69	1531.84	1254	1481.9	2019.69	1758.05	1915.13	2530.68	2341.36	2108.16	3359.62	990.926	1400.73	2363.47	3432.15	1807	1790.52
1645.86	1150.92	1754.89	1294.43	988.354	2426.32	1436.57	1046.34	1158.29	758.494	2261.98	1270.76	1157.21	3950.11	1932.16	2102.04	2251.61	1452.23	1897.63	1833.42	1256	1339.1	656.787	962.952	2800.16	1146.78	1428.64	1497.94	1533.12	2699.41	1264.3	1822.96	2203.86	1810.59	1536.46	1223.99	1479.25	2030.24	1767.61	1930.83	2551.89	2319.02	2069.49	3335.57	981.392	1399.82	2352.42	3434.97	1776.13	1786.59
1643.63	1139.25	1753.49	1276.24	1001.72	2438.84	1434.03	1044.45	1150.28	762.972	2252.26	1273.47	1173.15	3968.04	1947.65	2118.71	2267.72	1469.62	1895.51	1841.91	1256.82	1347.66	670.824	948.829	2801.78	1135.11	1427.94	1494.4	1519.04	2705.82	1276.62	1820	2208.02	1788.14	1564.23	1232.93	1529.86	2056.8	1757.82	1937.11	2569.26	2408.26	2126.24	3302.88	979.29	1441.87	2390.76	3438.61	1812.25	1754.29
1632.59	1147.77	1763.08	1283.91	1008.2	2431.42	1443.9	1044.88	1143.57	763.981	2249.04	1281.63	1168.56	3957.42	1952.82	2092.66	2252.4	1471.07	1892.31	1840.65	1256.67	1360.58	664.212	960.416	2814.05	1127.35	1420.47	1484.96	1501.63	2719.08	1280.1	1813.05	2308.93	1812.03			1561.69	2059.66	1787.69	1923.92	2561.41	2436.74	2111.26	3334.84	997.64	1450.6	2387.24	3430.93	1817.75	1766.64
1654.45	1137.56	1758.91	1279.89	1000.45	2428.31	1447.48	1050.97	1139.09	769.528	2249.96	1299.28	1172.96	3940.14	1950.64	2111.23	2256.02	1474.39	1910.56	1821.68	1250.95	1346.72	668.213	961.876	2795.98	1145.67	1413.6	1478.01	1491.63	2713.07	1288.03	1827.53	2264.15	1811.25			1584.72	2089.5	1722.02	1940.04	2575.56	2355.88	2116.69	3321.22	991.019	1451.13	2369.96	3417.8	1784.04	1775.79
1655.28	1140.32	1762.92	1276.66	997.195	2413.25		1044.94	1159.45	772.977	2252.35	1284.68	1173.5	3910.55	1955.19	2100.22	2245.06	1478.07	1898.84	1829.81	1250.39	1340.7	661.655	948.084	2816.75	1132.86	1419.56	1491.08	1493.76	2705.67	1277.51	1803.01	2248.26	1823.29			1521	2070.23	1765.91	1964.6	2536.88	2360.29	2110.13	3327.15	985.68	1456.1	2377.7	3311.55	1821.41	1786.4
1661.94	1159.63	1758.65	1275.79	1001.68	2424.24		1030.81	1152.04	778.404	2255.76	1291.37	1172.36	3917.5	1958.46	2101.97	2253.45	1478.58	1925.12	1828.32	1230.46	1342.7	658.567	948.882	2806.41	1143.16	1416.93	1489.34	1481.73	2688.18	1281.24	1806.77	2284.43	1786.46			1553.52	2105.99	1793.51	1970.47	2613.84	2417.73	2074.83	3341.84	990.962	1453.7	2382.7	3345.23	1810.85	1793.13
1670.66	1145.25	1756.76	1286.54	1000.42	2447.45		1042.66	1157.52	775.097	2236.37	1290.17	1176.53	3918.98	1948.31	2102.31	2258.53	1477.89	1918.16	1837.31	1234.55	1353.62	672.009	944.389	2804.59	1147.85	1406.75	1478.92	1477.46	2688.61	1274.98	1803.83	2307.14	1833.46			1587.56	2126.97	1788.44	1976.55	2588.68	2436.2	2138.82	3312.94	985.596	1445.59	2383.69	3430.09	1814.35	1780.51
1670.78	1146.05	1779.44	1257.26	1002.07	2448.71		1058.43	1155.95	777.128	2246.39	1289.03	1180.42	3899.45	1920.57	2102.95	2256.69	1474.78	1913.78	1858.99	1214.23	1350.72	667.685	934.91	2812.95	1145.67	1408.69	1476.2	1477.65	2673.16	1292.57	1807.93	2284.41	1843.33			1496.08	2114.93	1785.91	1932.66	2551.52	2429.61	2139.37	3321.38	986.278	1454.51	2393.01	3421.99	1816.24	1821.84
1659.96	1157.72	1774.48	1265.28	1000.14	2438.84		1052.64	1154.01	788.471	2237.16	1281.3	1194.84	3894.98	1918.28	2080.32	2264.98	1478.99	1915.12	1839.81	1214.74	1353.06	671.095	930.907	2804.65	1143.87	1407.11	1480.56	1469.44	2658.08	1280.75	1805.16	2278.88	1793.83			1563.07	2140.42	1839.11	1965.68	2569.01	2372.18	2116.94	3360.74	984.259	1428.69	2430.95	3406.56	1791.7	1794.05
1674.74	1151.64	1765.89	1276.34	1002.67	2448.49		1057.29	1137.56	801.112	2248.1	1278.59	1190.53	3854.78	1908.94	2091.33	2255.46	1478.77	1914.24	1850.37	1223.74	1351.18	660.675	927.062	2807.98	1146.9	1399.1	1486.11	1466.64	2642.35	1299.21	1796.16	2296.55	1859.46			1548.92	2172.15	1818.2	1948.4	2615.77	2449.05	2145.02	3333.21	996.281	1500.15	2382.63	3387.45	1803.71	1815.49
1672.72	1148.18	1762.85	1260.73	1007.52	2463.67		1077.66	1126.35	795.431	2227.41	1275.25	1197.27	3843.74	1906.39	2085.44	2232.15	1483.73	1921.53	1840.27	1217.93	1354.98	660.355	911.538	2804.44	1149.06	1411.61	1480.89	1443.36	2628.48	1292.76	1778.73	2278.31	1855.57			1527.95	2168.79	1783.48	1985.68	2576.15	2463.84	2139.84	3384.91	989.494	1444.46	2408.55	3396.54	1799.79	1810.98
1668.94	1153.4	1766.22	1278.08	1001.31	2467.02		1070.55	1123.71	805.901	2233.61	1281.15	1205.99	3867.82	1901.86	2086.1	2218.39	1493.81	1905.61	1866.82	1200.78	1355.51	649.837	900.87	2797.39	1150.63	1419.21	1489.78	1463.32	2626.4	1300.53	1772.29	2362.14	1822.42			1665.16	2214.67	1781.83	1966.27	2576.39	2451.59	2143.85	3388.59	997.417	1488.66	2399.54	3275.6	1771.22	1810.13
1676.81	1150.86		1250.03	1007.67	2457.91			1150.43	799.157	2212.96	1277.37	1215.14	3838.83	1900.15	2086.74	2217.49	1490.75	1916.38	1833.55	1207.42	1350.78		912.195	2817.31	1140.93	1419.06	1478.61	1431.08	2634.04	1293.24	1774.9	2347.85	1839.76			1637.28	2151.76	1843.3	1980.03	2663.29	2440.8	2177.04	3362.83	997.725	1490.94	2430.8	3396.69	1807.07	1843.94
1666.39	1156.07		1255.64	1012.86	2458.81			1145.99	802.72	2227.16	1274.06	1211	3818.78	1899.11	2090.44	2204.24	1493.89	1929.76	1824.11	1212.6	1344.32		911.812	2801.66	1156.88	1421.56	1482.05	1428.81	2636.56	1291.02	1764.34	2417.86	1751.47			1639.01	2181.86	1828.71	1956.28	2622.66	2443.02	2173.85		972.254	1467.21	2403.28	3372.95	1808.95	1849.86
1671.07	1152.17		1267.08	1013.68	2465.6			1131.12	814.287	2224.3	1278.72	1224.96	3789.87	1893.69	2091.49	2206.88	1504.34	1948.34	1826.4	1195.88	1348.37		907.481	2802.29	1150.8	1389.19	1498	1435.27	2637.39	1287.96	1762.24	2319.47	1822.12			1619.13	2185.53	1819.07	1988.42	2660.74	2464.03	2207.15		989.096	1496.18	2454.59	3375.88	1801.63	1843.36
1683.08	1158.54		1253.51	1025.07	2442.15			1136.28	814.318	2209.5	1263.9	1222.52	3767.04	1898.52	2094.15	2193.66	1504.68	1932.41	1842.37	1207.91	1350.04		897.881	2814.71	1135.84	1387.01	1488.48	1422.04		1289.58	1770.1	2337.76	1782.76			1729.04	2195.23	1837.27	1995.06	2651.94	2399.44	2192.35		1008.37	1462.8	2369.24	3354.55	1794.49	1821.61
1681.68	1171.38		1247.19	1002.61	2451.37			1126.54	822.03	2200.98	1271.35	1222.95	3746.65	1894.67	2075.17	2192.33	1505.43	1932.71	1820.58	1204.93	1340.16		897.288	2817.02	1123.33	1370.63	1499.48	1413.94		1277.45	1745	2468.4	1796.07			1752.18	2217.31	1837.1	2021.14	2685.29	2465.67	2217.6		1013	1458.45	2441.58	3316.54	1808.83	1860.52
1692.85	1160.42		1238.42	1011.83	2451.9			1120.88	832.776	2209.46	1270.39	1225.57	3744.2	1890.29	2075.28	2191.9	1509.25	1932.38	1839.37		1329.65		901.591	2826.8	1116.59	1363.65	1496.5	1406.34		1280.58	1741.08	2354.02	1817.08			1737.74	2186.09	1819.96	2027.68	2650.47	2467.17	2215.66		1011.43	1460.32	2437.38	3323.42	1790.96	1853.22
1688.57	1154.22		1232.88	1012.06	2457.06			1131.19	820.078	2200.03	1260.48	1227.48	3713.26	1897.42	2073.5	2180.48	1520.32	1940.11	1850.56		1340.41		895.159	2818.09	1121.27	1357.95	1489.12	1411.07		1291.46	1739.88	2328.42	1796.6			1660.89	2199.69	1834.9	1998.73	2713.93	2423.45	2214.26		1015.18	1500.28	2417.82	3295.87	1805.26	1839.06
1690.47	1166.47		1231.59	1016.62	2441.52			1125.65	823.205	2182.58	1250.35		3705.07	1905.23	2060	2177.31	1536.44	1936.21	1872.99		1324.16		884.818	2804.09	1113.48		1481.63			1288.23	1722.8	2425.97	1826.36			1834.91	2187.21	1840.19	2039.34	2684.83	2457.05	2228.08		1029.29	1447.93	2418.93	3298.15	1824.9	2097.68
1688.87	1161.39		1232.88	1000.56	2454.11			1133.43	817.166	2177.09	1272.25		3673.77	1900.17	2060.44	2165.13	1537.95		1856.61		1318.49		885.72	2812.68	1112.26		1474.47			1296.35	1720.25	2470.41	1807.81			1642.17	2205.76	1855.81	2042.76	2718.53	2495.51	2220.06		997.795	1498.68	2394.85	3253.04	1987.43	1865.04
1696.59	1144.4		1240.67	1002.24				1114.25	828.666	2178.33	1265.65		3678.26	1905.89	2061.97	2146.45	1534.09		1867.46		1325.95		872.444		1113.32		1482.88			1316.52	1708.57	2489.52	1838.52			1595.4	2240.49	1862.63	2047.31	2686.65	2458.22	2234.16		1008.98	1474.15	2412.26	3270.75	1826.21	1866.14
1718.49	1149.27		1219.94	1003.18				1112.73	821.939	2181.54			3672.78	1908.95	2058.16	2155.46	1525.18		1880.28		1325.52		861.841		1161.13		1459.07			1307.23	1707.12	2524.43	1815.99			1661.2	2269.49	1862.99	2042.5	2733.58	2408.57	2228.89		1032.31	1496.18	2397.66	3358.49	1819.95	1853.03
1708.69	1150.16		1215.98	997.524				1126.22	834.673	2194.39			3650.13	1915.14	2042.19	2150.15	1536		1862.69		1324.05		849.704		1162.7		1445.5			1299.79	1693.6	2373.96	1855.03			1720.5	2252.81	1846.49	2058.62	2717.13	2397.25	2224.42		1022.58	1502.07	2411.16	3373.1	1813.3	1897.44
1717.94	1165.81		1185.94					1125.39	828.982	2153.22				1919.82	2039.52	2145.16	1531.08		1855.39		1338.07				1138.08		1431.38			1293.03	1697.19	2417.87	1815.72			1674.67	2288.86	1868.91	2039.67	2765.41	2373.77	2189.31		1017.56	1516.82	2408.92	3348.49	1839.38	1854.37
1725.3			1186.45					1123.65	834.382	2170.66				1912.64	2042.06	2129.31	1522.07		1865.4		1335.4				1151.97		1456.45			1277.87	1704.64	2546.19	1833.1			1718.34	2269.28	1891.69	2106.72			2225.59		1032.77	1515.35	2423.62	3328.67	1778.14	1875.94
1727.81			1173.84					1126.88	836.545	2139.28				1933.69			1528.92		1852.79		1330.7				1154.48		1463.44			1280.34	1697.78	2480.64	1818.49			1711.19	2208.08	1858.55	2098.39			2229.17		1049.36	1508.44	2390.2	3372.4	1781.89	1867.37
1728.5			1171.32					1128.37	850.158	2128.91				1909.92			1539.19		1869.97		1335.75				1160.82		1457.35			1287.65	1696.38	2516.14	1866.49			1682.07	2239.51	1860.33	2069.51			2209.12		1057.43	1503.65	2369.84	3387.01	1799.17	2309.14
1725.59			1153.67					1132.01	864.063	2142.99				1917.77					1839.42						1157.84		1460.37			1280.99	1679.37		1828.73			1730.89	2274.65	1893.77	2083.28			2227.74		1061.18	1513.88	2413.46	3370.51	2095.48	1893.45
1729.76			1133.93					1128.26	849.333	2129.44				1893.11					1847.64						1162.51		1461.77			1275.17	1677.55		1861.7			1696.9	2264.86	1868.43	2114.56			2231.91		1054.14	1476.14	2437.83		1781.58	1883.97
1739.51			1146.29					1138.22	853.097	2149.12				1900.87					1864.62						1163.28		1448.5				1675.27					1693.25	2251.8	1883.83	2115.3			2260.72		1073.16	1491.28	2421.49		1778.7	1885.95
1734.03			1136						850.036	2124.87				1878.33					1863.53						1184.61		1447.24									1854.86	2209.82	1889.81				2278.32		1074.4	1520.69	2373.32		1810.43	1910.4
1746.12			1123.66							2098.31				1890.55					1855.98						1182.38		1455.85									1741.11	2304.67	1892.38				2262.48		1078.25	1504.91	2403.37		1790.44	1899.8
1752.73			1122.17							2109.1				1877.82					1846.57						1176.72		1448.51									1797.02	2297.9	1872.92										1794.05	1867.77
1753.17			1119.03							2086.54				1883.4																							2297.43											1769.4	1893.38
										2107.41				1889.01																																		1797.8
[truncated: 63 more columns]

## Sheet: EIPA+Y-27 A
1	2	2	2	3	3	4	4	5	5	5	5	6	6	6	6	7	7	7	7	9	9	9	10	10	10	11	11	11	11	12	13	1	1	1	1	4	4	4	4	4	4	3	3	3	3	3	3	4	4
2	1	3	6	6	7	8	10	3	5	8	9	2	3	4	7	2	5	6	7	1	3	6	1	4	6	3	5	8	14	1	7	2	3	4	5	1	2	3	4	6	7	1	2	3	5	6	8	1	3
6.76	21.737	5.408	24.337	8.008	9.777	16.953	14.769	29.018	9.777	44.307	24.441	25.17	44.515	111.391	55.227	6.76	26.626	28.29	9.257	26.522	10.713	11.857	8.112	23.401	19.449	16.953	15.081	7.904	7.176	28.394	20.905	25.69	20.281	9.569	13.625	23.401	19.449	19.969	14.977	26.834	65.628	8.321	25.482	10.297	14.561	8.216	6.76	11.233	53.147
18.929	33.698	20.801			27.458	40.354	22.569	52.627		70.412	57.203	47.531		138.952	73.532	28.186	84.869	53.251	29.642	52.003	26.21	22.361		34.114	45.555		56.475			55.019	79.565	62.196	64.9	50.859	29.434	83.309	48.675	50.235	29.954	65.004	146.753	38.794		33.698	47.115	31.514	37.13		195.74
41.498	65.004	33.698	62.508	15.393	29.33		60.948	50.651		94.854	64.38	70.412			123.975	41.186	133.44	125.848	78.941	100.574	32.554	58.452	49.819	78.005	105.67	42.643	96.622	31.41	34.322	63.444	132.296	97.038	117.839	110.663	36.298	95.686	77.069	91.838	52.315		200.524	72.596			74.468	59.18	75.509
50.027	90.381	47.427		23.505	66.772	71.66	76.341	69.268		140.72	95.894	73.532	77.069	168.178	214.877	81.437	153.409	194.076	105.67	143.009	86.741	97.038	62.612	150.185		80.085	181.387		94.334	90.069	159.962		170.154				111.079	120.127	82.581	123.975		93.606	62.924	50.131	91.421	89.029	164.538	66.044	196.884
	138.328	120.127	57.411	39.834	75.093	99.742			16.537			89.653	98.494	193.036	255.127	92.15	194.284		198.86		135	130.736	78.525	266.464	116.175	115.239		52.627	156.737	115.967	223.717	205.1	229.23	119.503	60.116	117.111	140.824	165.682	125.952	157.049	294.546	133.96		51.795	108.791	118.255	220.181
130.32		158.506	80.917	86.221	121.999	141.553	161.834	83.413		145.609	163.81	90.381	121.063			100.158	236.406	235.054		166.93	171.818				165.682	179.931	203.852		257.831	145.089			263.24					183.467		217.269		151.537	118.359				269.272	85.701	316.075
	142.801	196.676	100.158	92.462	141.449				22.569			155.593	137.6	227.67	276.553							163.186	79.565	294.546				94.438		204.892	216.645	235.886		175.875	101.822	127.096	225.59		201.876		308.275	187.731		59.492	152.681	215.085
168.49		234.742	176.499	137.704	154.345	158.61	170.778	138.536					183.363	270.208	286.433	197.82	277.177		236.718	167.762	185.547				186.275	198.34	232.766		268.544									247.535	242.855	328.244		229.334	183.987				321.691	140.304
181.699	147.065		198.028					177.331	34.946	152.993	163.186	198.236				240.982		246.287				155.281	108.271	304.738				130.32		241.399	221.533		376.607	203.436	194.7	191.476	269.272							90.589	250.239	261.576			344.885
	202.188				266.568	140.304	164.018						194.492	287.057	325.436		354.245		284.353	175.563	202.604		153.409		220.077	221.533	287.161		283.625									286.017	263.656	440.882	443.483	275.617	278.113
198.756		232.142	238.798	159.026				214.773		192.412	162.562	203.228	237.862			268.856				209.781		172.338	208.741	318.467				168.178		261.576	235.054					200.836	354.765							110.975				189.707	451.595
	257.415			191.788	311.915	172.026	176.603		40.354								309.211				193.348				227.254		326.892	219.973	321.483			556.017		270.208	222.261					479.573	538.96	323.251	378.271		364.23	400.84
219.037			255.231					205.308	134.792	241.919	183.155	228.502	275.409	298.082		264.072			304.218	201.46		181.595	220.701	302.554		233.078				288.929	264.592					277.697		358.614						148.625			515.871	216.229
	264.28			220.493	300.266	192.412	176.707											253.567			216.333				201.252		312.019	265.216	350.397				661.688				478.013												470.836
242.855			329.18		295.69			217.789	140.304	259.392			352.581			279.049						225.07	210.301	328.66							292.986					332.612			325.956	615.717	650.663			158.402				206.66
		235.47		199.692		228.294	212.381				174.939									221.741					251.903				362.67
277.073			374.318					228.086	174.731	292.466			347.277	311.707		311.915					239.63							366.414		359.654				379.207	374.214							393.664	463.764	135.936	494.342	566.73
				244.207		252.111														222.573			245.039		275.305		385.135		369.846							378.063		523.671
303.074	264.592												407.392															393.248					829.034				730.54												555.705
								271.144	161.626	348.317			473.228	346.757	579.731	377.751															355.597									751.757	760.494							235.99
																				238.902								394.808
													601.572								305.674											1207.51
												244.727																524.4								478.117											750.197
									161.418									268.44															1052.75
					388.047		216.021	281.545																411.137							364.022								478.325
		253.255							180.347		179.307						363.294
																																		602.924	769.958							513.999	799.912	216.437	800.952	963.826
				295.482									743.853										310.355													559.866		758.622
348.837	354.141		664.288			392.936																															992.22												901.11
										504.95				647.231	731.372	485.085																								1373.3	1026.13							335.108
																				304.842
																																1410.85
																												818.425																			1183.28
																		334.796												562.986			1351.04
					465.74			424.866																537.608							505.782								686.545
									187.211		189.395
		337.708					277.905															435.37																				714.003		278.425	885.509	1244.75
				309.731									1114.22										390.855			461.996	544.369									779.527		865.852					1047.24
655.551																																					1209.18												580.043
										682.073				906.102		593.356													528.768											1596.29	1173.71							279.361
																				414.985												1650.06
																																															1403.04
			772.35									265.528																937.304					1419.37
								579.627										479.053																					832.986
					611.765				218.621															642.967
											223.925																															784.415		299.954	1159.25	1376.32
																																				894.038		1065.96
874.381				367.454									1258.68										477.389														1450.06												744.373
	578.899									814.161				1148.64																										1716.62	1559.89							439.946
															998.252	746.245
																	484.565				529.808											1512.98
																																															1727.13
																														736.676			1434.97
								495.902																							750.925								811.041
									248.159
																																										998.356		280.713	1229.15	1592.86
																			611.245						462.1		652.535									1028.41		1156.34
962.058			790.864																																		1421.14												723.259
										938.344				1372.78																																		444.419
[truncated: 9 more columns]
