# Supplementary material for: A mechano-osmotic feedback couples cell volume to the rate of cell deformation
Source: eLife journal article supplement (doi:10.7554/elife.72381), 2022-04-13
Supplement: supp [file volume.xlsx]

## Sheet: control all
position	1	1	1	1	1	1	1	1	1	1	1	1	2	2	2	2	2	2	2	2	2	2	3	3	3	3	3	3	3	3	3	3	3	3	4	4	4	4	4	4	4	5	5	5	5	5	5	6	6
cell	1	2	3	4	5	6	7	8	9	10	11	12											1	2	3	4	5	6	7	8	9	10	11	12	1	2	3	4	5	6	7	1	2	3	4	5	6	1	2
t (min)		1						1	1			1																			1					1		1							1	1		1	1
0	100	100	100	100	100	100	100	100	100	100	100	100	100	100	100	100	100	100	100	100	100	100	100	100	100	100	100	100	100	100	100	100	100	100	100	100	100	100	100	100	100	100	100	100	100	100	100	100	100
1	99.6533	94.8823	99.0716	99.8427	100.503	100.285	98.9585	99.3657	99.0101	99.7414	100.848	99.938	99.6888	99.2134	99.3977	100.193	99.6609	98.9561	100.401	100.234	100.329	100.532	98.7285	99.2496	100.113	99.2239	99.7381	99.2031	99.9764	99.7484	100.249	99.7776	98.2935	98.3479	98.9038	99.9387	100.426	100.642	99.5328	99.4218	99.7679	100.52	100.832	102.165	99.8543	99.561	98.9338	99.8187	100.781
2	98.8747	88.6641	99.0066	99.3282	100.549	100.466	97.5552	97.8783	97.5902	99.3818	101.371	100.206	99.3947	98.9112	98.156	100.384	99.4046	98.562	100.597	100.154	99.8962	100.163	98.8882	98.8553	101.61	99.1534	98.6593	98.4792	99.6104	99.942	100.234	99.0645	97.8744	98.5297	99.5279	99.741	102.332	100.891	99.6113	99.4537	100.307	100.072	101.237	102.871	98.9669	99.7359	97.2193	99.7954	99.864
3	99.1843	83.9043	97.5451	98.0927	100.586	100.603	97.4371	97.4805	96.6797	98.3875	100.908	100.136	98.1891	98.9042	98.2698	100.053	99.7014	98.9777	100.721	100.644	99.5237	99.5649	98.4676	99.8852	100.711	98.9579	98.4846	98.3528	99.3649	99.9805	100.122	98.7158	96.5115	98.3282	99.0703	98.2731	101.671	103.442	98.6884	98.5506	101.344	99.0607	101.42	103.734	97.8687	100.249	98.6215	99.8118	100.638
4	99.5943	79.2849	98.5058	98.3548	100.753	101.202	97.0212	97.4514	96.6868	97.8503	101.397	99.7612	98.1164	98.3449	98.7848	100.672	99.9992	98.3573	100.438	100.903	99.4288	100.491	97.8355	100.494	101.711	99.0987	98.2507	98.4941	99.774	100.284	99.1135	98.2726	96.8325	98.1337	99.0841	97.7048	102.849	102.746	98.763	98.2437	101.095	98.7974	101.893	104.489	97.0036	101.114	98.6506	100.156	100.852
5	100.827	72.5955	100.539	99.3343	101.85	102.011	95.9664	97.276	96.2567	99.6612	103.737	100.609	96.4279	98.8483	98.3514	100.73	100.737	97.3522	101.224	100.767	101.481	101.261	99.02	99.6659	103.057	104.724	99.0395	99.4731	101.211	100.898	100.37	98.8674	97.819	97.896	100.982	98.9009	106.196	106.123	97.017	99.3591	100.072	98.7591	101.5	106.902	98.2073	102.399	98.7893	100.496	101.865
6	101.381	72.6714	100.239	100.001	102.556	102.918	96.1895	97.9538	97.3164	100.501	104.12	101.983	98.1666	101.115	99.1271	101.422	101.852	98.7151	103.202	101.911	101.997	101.716	100.626	100.74	104.287	105.753	100.426	99.5806	102.24	101.368	99.8415	99.6006	98.2502	98.2304	101.831	98.473	105.193	106.995	99.2041	101.32	101.075	99.7555	102.36	108.588	98.2661	102.79	100.22	100.197	102.89
7	101.319	72.9209	100.467	99.7046	103.547	102.865	96.7551	98.7725	96.8984	100.834	103.778	102.26	98.0788	102.022	99.3625	101.314	101.874	100.165	102.589	102.744	103.21	101.924	100.706	101.093	104.866	106.08	100.461	100.27	102.042	102.441	100.881	99.736	97.5659	98.5024	102.07	99.8825	104.537	109.736	98.4471	101.501	101.16	100.275	102.037	107.334	97.7861	104.413	100.216	98.9189	103.569
8	102.72	71.6252	99.8747	99.2558	103.516	103.128	97.0342	98.4565	97.1038	100.761	104.96	102.871	97.5275	101.629	98.8012	101.052	101.577	99.9455	102.305	103.13	103.149	102.125	99.9432	101.046	105.163	106.568	100.603	100.668	102.105	101.809	100.219	99.3511	97.8977	97.8956	102.3	98.3664	105.371	112.542	99.1339	100.321	102.1	99.0855	102.095	108.021	97.4414	104.525	99.4191	99.1607	102.884
9	103.966	71.44	99.8087	98.7002	103.529	103.093	97.3442	97.489	96.8621	100.965	104.015	101.736	97.3357	100.705	99.1751	101.224	101.437	100.07	102.192	103.21	102.069	101.824	99.8816	101.043	105.576	106.337	99.9885	99.6537	101.41	101.784	98.9629	98.8933	97.7569	97.1969	102.744	97.9768	105.013	113.473	98.6027	99.1744	102.212	99.3208	101.155	106.607	97.324	104.686	99.2994	98.3903	103.19
10	104.575	69.6145	99.0586	98.7294	104.092	102.563	96.3268	97.2961	96.9188	99.6287	103.933	101.676	96.0554	100.13	98.2226	100.082	100.75	99.4119	102.378	103.915	102.029	100.97	99.8655	101.658	105.124	105.958	98.955	98.8096	100.912	101.549	99.3343	98.3278	96.8985	97.3858	102.406	97.4193	105.808	114.997	98.7512	98.57	101.643	99.0893	101.557	106.922	96.5441	104.417	98.0846	99.02	102.502
11	106.45	68.1882	98.1391	98.8353	105.139	101.866	95.5504	96.0599	95.9062	100.32	103.527	101.459	96.0671	100.246	97.4217	100.092	100.915	98.8419	102.491	104.672	101.175	101.397	99.5225	101.214	105.056	105.043	98.2655	98.5849	101.33	101.547	98.1346	98.1191	96.2316	97.2299	102.456	97.8448	105.282	116.652	96.7838	98.2316	102.749	98.1481	100.587	107.586	96.082	104.768	98.8486	98.5315	102.026
12	107.138	67.7268	98.5785	98.1484	103.729	101.717	95.4667	95.1465	96.1016	98.4768	103.416	101.572	96.0505	100.213	97.6508	99.8216	100.636	99.4784	102.241	104.619	100.684	100.987	98.9993	101.609	104.739	106.07	98.1653	98.372	101.043	101.411	97.8959	97.5404	96.1549	96.384	101.646	97.9055	106.235	118.651	97.7334	97.7786	101.306	98.6714	100.82	107.25	96.5604	105.414	97.7034	99.3721	101.514
13	107.163	67.6481	98.0806	98.1473	104.629	101.292	95.0921	95.3719	96.0991	98.5942	103.441	101.815	95.7277	99.455	97.0198	99.5446	100.655	99.5261	102.208	105.479	100.269	100.291	99.1135	101.842	105.373	105.87	97.7649	97.8523	100.508	101.365	97.5136	97.6447	95.7671	95.5491	100.901	97.3819	106.345	118.344	97.1581	97.674	101.662	97.8709	100.31	107.445	96.5447	104.977	97.286	98.4445	101.606
14	107.188	67.0158	97.6286	97.8527	104	101.442	95.792	94.8673	96.7271	98.9394	103.053	102.139	96.4092	98.9133	97.0717	99.9835	100.151	99.2025	102.352	105.619	99.625	101.064	99.1307	101.378	105.242	106.502	96.8468	98.2597	99.7497	101.931	97.9351	97.4583	95.5231	95.1688	101.903	97.0035	107.055	119.281	96.9944	98.3878	102.008	97.9431	100.689	107.268	96.5726	105.437	98.8975	97.9377	101.714
15	107.706	66.5769	97.5266	97.3732	103.795	100.5	95.7746	93.9241	96.4483	98.5841	102.709	101.956	95.5436	98.9777	97.2628	100.096	99.5679	99.4695	102.323	105.78	99.1033	100.306	98.4815	101.135	104.636	105.799	96.2079	97.971	99.1284	101.225	96.7918	97.6978	94.509	94.6495	100.976	96.7342	108.562	120.371	97.4931	97.9505	102.374	97.1152	100.44	107.008	96.3063	105.619	98.0441	97.9379	101.751
16	107.085	66.8734	97.2947	97.4808	103.833	100.653	95.7018	94.0025	96.6352	98.4487	102.74	101.992	95.5354	98.2319	97.0915	99.3139	99.8226	99.2787	102.138	106.611	98.932	100.02	98.1547	101.201	104.143	105.898	96.359	97.1709	98.7826	101.623	96.7267	96.8527	94.4885	94.9394	101.734	96.7211	108.257	121.092	96.5638	98.3104	102.205	98.0567	100.094	106.577	94.9054	106.317	98.2758	97.9861	100.893
17	108.133	66.6538	97.2239	97.1112	103.868	100.326	94.9927	93.9221	96.7948	98.0033	102.391	102.642	94.5804	98.1697	96.5452	99.7745	99.7219	98.8376	102.445	106.686	98.3273	99.9012	97.7956	100.906	104.694	105.316	95.978	97.8224	98.9885	101.863	96.4379	96.5791	94.9975	95.5944	100.756	96.6006	108.827	121.596	97.0937	96.83	100.889	97.8696	99.7656	105.643	94.5352	105.228	97.8717	97.7489	100.425
18	108.039	67.2664	97.7854	97.3993	104.283	99.9493	95.4191	93.1528	96.7814	97.6872	101.271	102.912	94.422	98.517	96.4847	99.5975	99.5915	98.6887	102.051	106.531	98.6152	99.7855	97.8637	101.744	104.683	104.938	95.5881	97.1849	99.7659	101.776	95.7867	96.8339	93.9492	95.5188	101.142	96.356	108.823	122.115	97.3516	96.829	101.744	98.0145	99.9616	105.807	95.1272	105.679	97.712	98.2688	100.875
19	107.48	67.6025	97.6927	96.1578	104.483	100.292	95.2345	92.7979	96.4178	98.0354	101.374	102.801	94.3165	98.4485	95.5699	99.6661	99.749	98.8041	102.086	106.089	98.3904	100.129	98.1529	101.331	104.339	105.303	95.5302	97.2064	99.5987	101.292	96.081	96.3276	94.479	94.5246	101.457	95.6748	109.54	122.568	97.3216	96.299	101.307	98.5236	100.521	105.761	94.8762	105.522	97.633	98.9249	100.722
20	108.189	67.7886	96.8204	97.2628	103.936	100.486	95.5512	92.2771	96.5267	97.874	101.977	102.737	94.8053	98.5355	96.4923	99.9222	99.6156	98.3397	102.827	106.378	99.01	100.415	97.556	101.186	103.748	105.476	96.0539	97.2337	100.061	101.571	95.8968	96.8438	94.4198	94.9984	100.091	96.3879	109.535	123.163	98.4465	97.9566	100.589	99.0126	99.2872	107.007	95.0061	106.158	97.2665	98.9099	100.962
21	108.969	68.4931	97.0884	96.4491	103.932	100.185	94.8456	91.9505	96.4274	98.133	102.015	103.041	94.1748	98.5134	96.503	100.164	99.4771	98.7924	102.892	106.771	98.382	99.7802	96.9005	100.607	103.94	105.992	95.5676	97.7758	99.7626	101.419	95.4081	96.3742	94.8673	94.5198	100.312	96.8796	109.366	124.511	98.2794	97.1983	100.497	99.6239	99.779	108.116	94.4288	106.198	97.8189	98.1241	100.663
22	108.436	68.4063	96.7983	96.607	103.538	99.8639	94.8251	91.8916	96.317	98.315	101.627	103.056	94.5217	98.4273	96.0942	99.7442	99.3131	98.0626	102.672	106.253	98.9438	100.501	96.8862	101.09	104.357	105.777	95.2677	97.9193	99.9264	101.743	95.176	95.9909	94.3349	94.8504	100.45	96.3795	109.965	124.785	99.9261	98.47	100.553	98.7908	100.381	106.288	95.1527	106.173	97.6177	97.921	100.779
23	108.235	68.4111	96.5924	96.2216	103.921	100.34	95.0546	91.3034	96.1309	97.5309	102.396	103.139	94.1022	98.6998	96.6574	100.106	99.9795	98.3712	103.47	106.971	99.7211	100.515	97.6456	101.041	103.791	104.546	95.8239	97.8752	99.4971	102.276	95.7475	96.2164	93.8641	94.9931	100	96.4201	109.568	124.133	100.072	97.1767	100.476	99.344	100.392	105.823	93.0562	105.477	97.4219	97.4746	100.843
24	107.887	68.9556	96.7005	96.1231	105.174	100.403	94.7012	91.8888	96.1951	97.3887	102.664	104.087	94.1691	98.6868	97.2937	100.251	99.1004	98.6158	103.352	106.334	100.134	100.446	97.5786	101.859	103.845	105.497	95.6391	97.8878	100.314	102.122	95.4569	96.5142	94.6938	95.4084	100.33	96.5332	109.718	124.633	100.291	98.175	100.411	99.106	100.206	106.516	94.0799	105.954	97.687	97.9595	101.324
25	108.393	69.447	97.0315	96.5413	104.523	100.117	94.3934	91.0298	95.7586	97.9245	102.493	103.961	94.3871	99.3723	97.3092	100.619	99.7197	98.0479	103.862	106.483	99.8794	100.739	97.1158	101.389	103.322	104.321	95.5624	97.8064	100.378	102.576	95.392	96.563	94.4679	94.823	99.6993	96.3196	110.574	124.953	100.442	98.9656	100.768	99.3547	99.8298	106.042	94.9772	105.324	97.9422	97.6169	101.493
26	109.518	69.5896	96.5851	95.8634	104.155	100.314	94.5552	91.2637	95.9565	97.853	102.711	104.051	94.1167	98.9667	96.8737	100.77	99.4672	98.1921	103.296	105.752	99.5308	99.9948	97.0261	101.546	104.625	105.671	95.4403	97.1878	100.587	101.784	95.5028	96.0446	94.3108	95.3044	99.8575	96.0347	110.692	124.87	100.461	99.5647	100.686	100.365	100.312	107.799	93.9612	105.37	97.5517	98.4946	101.708
27	108.869	70.3898	96.531	96.6556	104.195	100.635	94.2782	90.6831	95.7254	98.621	102.525	104.585	94.2222	99.5891	96.8011	101.017	100.029	99.0939	103.936	105.833	99.8252	100.896	97.5339	101.218	104.114	104.828	95.9764	98.2237	100.498	102.542	94.8588	95.8384	93.6195	95.6124	100.935	97.3312	110.973	123.789	100.275	98.1436	100.551	100.36	99.5233	105.504	93.421	105.636	97.2309	98.5527	101.013
28	108.79	70.549	96.8909	96.067	105.102	101.111	94.0333	89.9367	95.7491	97.9216	103.311	105.669	94.1022	99.0861	97.1529	101.618	99.7509	98.3464	104.312	105.794	100.162	100.523	97.2854	102.25	104.871	105.622	96.2621	98.0862	99.8718	102.619	95.0737	95.5426	94.7822	96.0118	100.557	96.5142	110.787	124.227	100.482	99.8175	100.958	100.097	100.022	105.692	93.4248	105.297	97.7844	98.6186	102.261
29	108.772	70.5018	96.9493	96.1882	103.831	101.238	94.4923	89.4773	95.6602	97.996	102.948	105.175	94.1515	99.8639	97.0002	101.113	99.9135	98.8354	105.037	106.143	100.165	100.448	97.231	102.426	104.288	105.96	96.3466	97.9389	100.077	102.809	94.6729	96.3893	94.3887	95.1975	100.477	96.1628	111.298	123.777	100.612	99.2016	101.643	100.803	99.8438	107.182	93.2753	105.422	98.5187	98.6255	101.634
30	108.857	71.8037	97.4264	95.9888	104.536	101.574	94.3427	89.4142	95.8881	97.0338	102.604	105.686	94.4801	98.9404	96.981	101.678	99.4994	98.9026	105.245	105.469	100.216	101.063	96.6139	102.888	105.211	104.959	96.806	98.3805	100.046	102.464	94.8594	96.3675	94.6595	95.561	101.429	96.4302	111.342	124.642	101.842	98.8883	101.201	101.032	100.739	106.668	93.6491	105.336	98.3929	98.8644	101.936
31	109.605	73.2905	97.061	95.8498	104.835	101.753	94.1919	88.8173	95.2551	98.0146	102.867	104.757	94.0401	98.9981	97.513	101.21	99.7614	98.421	105.142	105.638	100.576	101.321	97.3037	102.2	104.361	105.073	96.1304	98.0623	100.817	102.607	94.6198	95.8194	94.4534	95.4996	100.564	96.2039	111.123	124.179	102.371	100.628	101.151	102.138	99.3158	107.837	93.5738	105.134	98.3812	99.132	101.879
32	108.876	71.7051	97.6299	95.636	104.511	101.592	95.0655	88.9285	95.0565	97.8119	102.915	105.517	94.3037	99.4687	97.2873	101.99	99.3317	99.22	105.604	105.766	100.399	101.444	96.4791	103.228	104.349	105.659	96.1999	98.5571	99.8208	102.901	94.8958	95.969	95.3284	95.7326	101.486	96.0043	110.607	124.164	102.49	102.465	101.595	101.805	99.9834	107.706	93.7705	104.915	98.6418	99.2451	102.17
33	109.68	72.4569	98.376	94.8109	105.395	102.075	95.1124	88.8534	95.137	97.4416	103.557	106.14	93.7077	99.2186	97.3174	102.298	99.8939	98.2738	105.313	105.379	99.5706	101.386	96.7166	103.323	105.017	105.738	96.6279	98.0172	99.7042	102.906	94.3101	96.1864	95.8449	95.4146	101.477	96.6509	110.389	123.72	101.619	103.475	101.556	102.247	100.35	106.604	93.8767	104.871	97.811	99.5337	102.124
34	109.372	73.0592	98.4642	96.1105	104.63	101.735	94.7689	88.6961	94.7652	97.9619	103.34	106.271	93.338	99.4253	97.4959	102.668	100.012	98.6141	106.437	105.157	99.55	101.536	96.4741	103.6	104.893	105.138	96.7983	98.5826	100.016	103.189	93.638	95.5444	95.8233	95.9394	100.829	96.4367	110.328	123.565	101.292	102.229	102.149	102.247	100.499	106.337	93.6477	104.579	97.8158	100.422	101.372
35	110.153	73.3457	98.0979	95.6212	105.242	101.533	95.035	87.808	94.7898	97.963	104.384	106.091	93.7752	99.5472	97.3381	102.096	100.529	98.7283	106.632	105.859	99.6721	101.868	96.1063	103.667	104.669	104.631	96.7009	98.8049	100.361	103.408	94.1174	96.33	95.8078	96.2103	101.433	95.7111	110.923	123.005	101.561	103.94	101.78	102.15	100.425	105.906	93.0651	104.747	97.7081	100.701	102.218
36	109.88	74.226	99.0699	95.2451	105.586	102.305	94.2776	88.1975	95.0756	97.4785	103.514	106.437	94.2199	100.118	98.2436	103.301	100.609	99.2535	107.252	105.496	100.349	102.027	96.6795	102.348	104.53	104.618	96.2075	98.9428	100.968	103.498	94.5044	96.4081	95.5566	96.2048	101.879	95.9987	111.491	122.873	101.225	103.77	101.852	102.692	101.222	107.273	93.266	103.968	98.6605	99.541	102.926
37	109.42	75.4199	99.44	97.1488	106.228	101.751	95.2316	88.1411	94.9752	96.681	104.624	106.387	94.3656	100.584	98.0959	103.2	100.795	98.9995	106.656	106.057	99.9484	102.003	97.2217	103.451	105.02	105.408	96.0829	99.2071	101.369	103.907	94.3938	96.1535	95.794	96.1975	100.455	96.054	110.587	123.241	102.545	104.67	101.874	102.625	101.628	105.688	93.8425	104.201	97.5241	100.023	102.522
38	110.652	75.7469	99.2763	96.4147	105.849	101.713	94.4388	88.4172	94.1154	97.4667	105.402	105.624	94.5035	101.149	98.0047	103.247	100.189	99.6571	107.946	105.963	100.436	101.642	97.0909	103.378	104.974	105.627	96.1417	98.7482	102.289	102.645	93.7708	96.2797	96.6594	95.9584	101.063	96.0323	110.776	123.019	101.818	104.473	102.423	102.595	101.182	107.301	93.0879	103.651	98.0595	99.8268	102.527
39	111.236	76.0498	99.7417	96.8088	107.142	102.159	94.6851	87.1572	94.047	97.422	106.02	105.872	94.2067	100.81	98.167	103.167	100.96	99.8384	107.407	105.891	99.9368	101.901	96.3958	103.657	104.973	104.467	96.3778	98.9963	101.819	103.031	94.4687	96.2081	96.8612	96.4923	102.071	95.9283	111.557	125.1	102.485	104.606	102.737	102.895	100.781	105.513	92.7889	103.199	98.3459	100.122	102.167
40	110.878	76.2857	100.072	97.2998	106.874	102.334	95.1843	87.8661	93.7875	97.2335	105.464	105.849	94.2456	100.885	98.0763	103.247	100.967	99.3335	108.566	106.229	101.029	101.73	96.8949	103.514	105.546	105.052	96.4219	98.6948	102.208	103.702	94.6037	95.8066	96.4105	96.822	101.261	95.7281	110.772	124.874	101.506	105.551	102.561	102.154	101.009	106.94	93.6617	103.33	98.0613	100.063	103.084
41	111.368	76.7345	100.919	97.1016	106.696	102.385	95.2994	88.0123	93.7952	96.8728	105.191	106.645	93.915	100.906	97.9585	103.45	101.186	99.9618	108.579	106.047	101.424	102.558	96.5078	104.073	105.355	104.187	96.5247	99.8486	102.514	103.818	94.8672	95.9331	94.7051	97.2123	100.819	96.2085	110.492	125.099	102.269	106.068	102.735	102.811	101.564	105.832	93.0174	102.999	97.6268	99.639	103.285
42	111.78	77.0578	101.124	97.8679	107.301	102.201	95.6499	87.569	93.3017	96.9205	105.108	105.961	94.6378	102.031	98.7012	103.565	101.092	99.9972	108.786	105.947	101.042	102.862	97.709	103.536	105.499	104.531	96.3191	100.107	102.907	103.323	94.4761	95.4539	95.5244	97.0326	101.402	95.7881	110.53	126.209	102.056	105.594	102.605	103.385	101.649	105.623	93.5274	102.548	98.3407	100.225	102.969
43	110.668	77.0374	102.004	97.9085	106.923	102.197	95.1874	87.5719	93.4858	97.3431	106.065	105.131	93.9959	102.116	98.4051	104.022	101.701	100.567	109.517	105.576	101.876	103.005	97.4577	103.557	105.63	104.798	96.6508	99.7122	102.363	103.399	95.5549	95.9088	95.6466	97.671	102.525	95.8542	111.289	126.296	101.42	105.925	102.768	103.29	101.349	105.729	93.1138	101.894	97.1289	100.476	102.255
44	111.603	77.7854	101.387	98.0934	107.546	102.831	95.1913	87.8903	93.2381	97.7304	106.26	105.074	94.678	101.292	98.6888	104.045	101.391	100.018	109.299	105.677	101.8	103.306	96.9353	104.147	105.986	104.376	96.9267	100.034	102.735	103.792	95.5368	95.9495	95.075	97.8281	101.156	96.1645	110.824	126.753	102.181	106.181	103.929	103.68	102.179	106.563	92.9124	101.48	98.612	101.089	101.444
45	111.584	78.3179	101.871	97.7508	107.149	102.38	95.4024	88.1202	92.9867	97.8926	106.665	105.04	94.5083	101.482	98.9191	104.586	102.541	100.036	109.156	106.199	102.887	103.344	97.4647	104.003	105.892	104.476	97.0587	99.7279	102.742	104.443	94.8635	96.1857	95.9287	98.9737	101.739	95.914	110.969	128.308	101.768	106.48	104.132	103.937	101.303	106.807	92.9009	101.93	97.6486	99.7959	101.605
46	112.634	78.3757	102.869	98.1217	107.053	102.282	96.1551	88.1543	92.7082	98.0594	107.744	104.603	94.7197	101.674	98.6736	103.659	102.263	100.785	108.67	106.68	102.634	103.281	97.2118	103.927	105.667	105.476	97.2867	100.121	102.619	104.402	95.3674	96.3379	96.6928	98.6026	101	95.3429	110.538	128.189	101.89	107.5	103.999	104.167	101.627	105.65	92.5032	100.995	98.7005	99.7881	101.049
47	113.228	78.6336	102.906	98.5285	107.555	102.052	95.8331	87.8047	93.3385	97.9629	109.766	104.367	94.0964	101.778	99.1292	104.001	102.411	101.084	109.166	106.533	103.728	103.215	97.0504	104.105	106.087	105.506	97.8591	99.9239	103.562	104.383	95.8121	96.1567	98.9218	99.4715	100.999	94.487	110.918	129.113	102.406	107.886	104.501	104.298	102.822	106.353	92.2228	99.752	98.8667	100.531	101.136
48	113.56	78.6256	102.963	98.0165	107.571	103.191	96.5611	88.1302	93.0547	97.7934	109.9	104.083	93.8653	101.521	98.7267	103.855	103.19	101.584	109.105	106.444	103.667	103.676	96.9352	104.903	106.067	105.122	97.5868	100.088	103.455	104.469	96.2988	95.9815	98.1888	99.153	101.586	95.3602	111.423	128.226	102.893	107.86	104.751	104.412	102.585	104.926	93.1801	99.979	97.3672	100.319	100.533
49	115.002	79.4616	102.794	98.9952	107.755	103.205	96.5186	88.9485	93.5191	98.1952	110.584	104.162	93.2699	102.499	99.1783	104.646	103.444	101.102	109.02	106.865	105.117	103.996	96.6726	104.24	106.232	105.487	98.4661	99.9234	103.935	104.563	95.8198	96.3988	99.0446	99.4449	101.735	94.7921	110.764	128.354	103.354	107.49	104.086	104.352	102.343	106.14	92.4955	99.5816	98.4253	99.8996	100.014
50	114.907	79.9087	102.599	99.1367	108.177	103.351	96.3196	88.3925	93.084	97.7672	111.461	103.97	93.5157	102.869	98.5471	104.221	103.824	101.332	109.523	107.277	106.611	104.237	97.0613	104.552	106.178	105.394	97.6689	100.476	103.753	106.188	95.5976	96.7503	101.814	99.746	101.828	95.1173	110.329	129.097	101.962	107.963	104.13	105.244	102.484	106.213	92.6619	99.5305	97.5472	99.9892	100.904
51	114.77	80.8546	102.786	99.2833	108.554	103.016	96.0069	88.4312	93.2209	97.907	112.335	103.443	93.5998	102.192	99.2331	103.989	103.566	101.395	109.528	107.263	106.247	104.556	97.1831	103.934	106.153	106.393	97.6129	100.062	104.287	106.265	96.1153	96.5954	102.564	99.3822	103.168	95.2941	110.001	128.562	103.042	107.054	103.908	104.557	102.505	105.574	92.8142	98.5186	98.3862	100.614	100.777
52	115.438	80.2897	103.017	99.4254	108.571	103.272	96.0103	89.4329	93.3896	97.526	112.253	103.22	93.6927	102.84	98.7535	104.506	103.52	101.923	109.564	106.692	107.314	104.323	97.6617	104.582	106.486	106.014	98.2341	100.304	104.974	106.338	96.5569	96.3685	102.866	99.8575	102.967	95.0471	110.566	127.815	103.311	105.726	104.56	104.53	102.978	106.882	93.2262	98.4838	97.9217	99.763	100.54
53	114.655	80.2343	102.423	99.1402	108.857	103.645	96.4779	89.3865	93.8179	97.9877	113.172	102.773	93.5523	103.843	100.329	104.353	103.905	103.002	109.502	107.762	107.163	105.084	97.9511	104.88	106.718	106.498	97.9537	100.978	104.975	106.569	96.1483	96.9536	103.416	100.561	103.263	94.6657	110.757	128.874	102.398	107.201	104.345	105.234	102.851	104.76	93.9752	98.5469	98.4225	99.9478	100.343
54	115.601	81.091	103.24	99.0989	108.96	104.108	96.2081	89.1092	93.4889	97.8822	114.275	102.642	94.3926	103.502	99.0465	104.151	104.511	102.416	110.219	107.553	107.758	104.733	98.0232	104.842	106.158	106.658	97.8007	101.454	104.825	106.809	97.0597	97.0478	104.069	100.05	105.199	95.0119	109.71	130.296	104.002	107.41	105.039	105.067	103.369	106.286	93.797	97.719	99.3643	98.5751	100.23
55	114.642	81.2753	103.032	99.735	109.535	104.015	96.972	89.9203	93.5777	97.8366	113.453	102.538	93.8539	103.71	99.691	104.955	104.836	103.197	109.873	107.478	108.02	104.119	98.9457	104.707	105.982	107.378	98.1054	100.85	105.293	106.627	96.6769	96.3008	104.875	101.328	104.771	95.187	110.636	129.215	103.12	107.7	105.155	105.126	103.696	105.748	94.0637	97.6155	98.954	98.5625	99.9054
56	115.833	81.8813	102.641	99.9182	109.431	104.775	97.6456	89.9113	93.4438	97.6673	113.769	102.771	94.0886	103.926	99.6439	104.873	104.593	103.478	110.424	107.84	108.227	104.172	98.5452	105.255	107.568	107.291	98.0881	100.71	105.21	106.463	97.1711	96.6449	105.61	100.469	105.709	95.4918	110.817	129.348	103.829	107.292	104.967	104.414	102.948	105.333	94.0886	97.5794	98.1526	98.1183	99.504
57	116.707	81.5635	103.375	100.929	108.729	104.63	98.12	89.6099	93.6353	98.5137	114.123	102.591	94.2605	103.574	100.066	105.094	105.226	103.635	110.056	108.028	109.151	103.93	99.0024	105.643	106.816	106.363	98.3411	100.852	105.906	106.374	96.5898	97.0324	105.63	100.628	107.375	95.3381	111.294	128.961	104.385	107.43	105.154	105.592	103.02	105.368	95.0484	97.7406	98.8399	98.0677	98.8766
58	116.314	81.84	102.839	100.767	109.391	105.067	98.9958	90.1949	93.3746	98.2982	113.745	101.605	93.7283	104.184	99.5309	104.407	104.603	103.576	110.546	108.03	110.579	104.285	98.0958	105.847	107.308	106.475	98.3078	101.385	105.522	106.403	97.0962	97.3371	105.883	102.001	107.837	95.8933	109.872	129.528	104.113	106.45	105.884	105.11	102.849	106.549	94.639	97.0844	97.7073	98.4965	99.0341
59	116.347	82.538	102.917	100.546	109.19	104.914	99.0411	90.9742	93.5539	98.6354	113.778	102.117	93.5934	104.097	99.2462	104.423	104.676	104.866	110.568	107.91	110.619	104.643	98.5008	106.005	107.294	107.227	96.973	100.608	105.837	105.296	97.114	97.3205	105.627	101.626	107.505	95.6337	110.798	129.759	102.985	107.111	105.765	105.668	103.681	105.108	95.317	97.7149	98.5838	98.82	99.413
60	116.493	81.6418	103.41	100.397	109.161	105.114	99.5857	90.2991	93.8535	98.5549	114.203	101.827	93.7423	103.989	99.0838	104.453	105.174	105.144	110.387	107.952	110.887	104.642	98.8355	106	107.928	107.386	96.9193	100.169	106.218	106.672	96.6889	98.2762	105.617	102.299	107.959	95.7282	109.992	129.675	102.842	107.155	107.296	105.573	103.952	105.791	95.4378	97.1118	100.414	98.524	99.6522
[truncated: 145 more columns]

## Sheet: control spread
position	1	1	1	1	3	4	4	5	5	6	6	5	5	1	1	1	1	1	1	1	1	1	2	2	2	2	2	2	2	2	2	2	2	2	2	2	2	3	3	3	3	3	3	3	3	3	4	4	4
cell	2	8	9	12	9	2	4	4	5	1	2	2	4	1	7	8	10	14	15	16	17	18	1	2	3	7	8	10	11	13	14	15	16	17	18	19	20	1	2	6	7	8	9	11	12	13	2	3	4
t (min)	1	1	1	1	1	1	1	1	1	1	1	1	1	1	1	1	1	1	1	1	1	1	1	1	1	1	1	1	1	1	1	1	1	1	1	1	1	1	1	1	1	1	1	1	1	1	1	1	1
0	100	100	100	100	100	100	100	100	100	100	100	100	100	100	100	100	100	100	100	100	100	100	100	100	100	100	100	100	100	100	100	100	100	100	100	100	100	100	100	100	100	100	100	100	100	100	100	100	100
1	94.8823	99.3657	99.0101	99.938	100.249	99.9387	100.642	99.8543	99.561	99.8187	100.781	99.8321	99.7591	100.895	99.0286	99.4214	99.0982	99.8168	99.1507	99.3201	99.5586	100.316	99.2204	100.405	99.0752	100.299	99.8117	100.006	99.8397	100.139	99.5784	98.0431	99.5341	100.145	100.085	99.8698	98.4553	98.8986	99.592	100.124	100.086	99.4885	97.8242	100.15	99.7084	99.0975	98.4242	100.52	99.7603
2	88.6641	97.8783	97.5902	100.206	100.234	99.741	100.891	98.9669	99.7359	99.7954	99.864	98.9067	100.479	101.124	98.92	99.7192	98.9965	101.062	98.3804	99.6241	99.1237	99.4862	98.8778	100.152	98.2364	100.355	99.923	99.3608	99.4072	99.5118	98.8274	96.8923	98.8202	100.983	100.712	97.7067	96.6743	99.1978	99.2508	100.601	99.4248	100.022	97.1769	101.178	99.6057	97.6815	97.7221	100.182	98.8638
3	83.9043	97.4805	96.6797	100.136	100.122	98.2731	103.442	97.8687	100.249	99.8118	100.638	98.8621	100.783	101.243	98.6645	99.5296	97.2577	101.584	98.3308	100.457	96.7596	99.1961	99.0342	100.188	97.2972	100.53	99.3861	98.8077	99.1412	100.477	99.232	96.2939	98.8939	100.265	101.446	97.5795	95.8704	98.5477	98.6872	101.231	99.502	99.8627	96.8371	101.281	97.9846	96.7766	97.0473	100.164	99.2158
4	79.2849	97.4514	96.6868	99.7612	99.1135	97.7048	102.746	97.0036	101.114	100.156	100.852	98.9908	100.919	101.659	99.4978	99.989	96.7021	102.089	97.4908	100.85	96.2926	99.4309	98.8743	99.5558	97.8398	100.648	99.6954	98.8125	99.2398	98.7463	98.2724	95.4473	97.9536	99.5484	101.999	96.776	95.845	97.704	98.5609	101.76	98.9918	99.6325	95.4494	101.879	97.9897	96.2503	96.4073	100.757	99.4953
5	72.5955	97.276	96.2567	100.609	100.37	98.9009	106.123	98.2073	102.399	100.496	101.865	100.453	100.698	102.492	99.0977	98.4488	97.5549	103.135	97.9456	101.861	96.8222	99.059	99.8142	99.9818	98.5221	101.177	99.2001	99.19	99.9598	100.887	98.8329	96.6124	98.4981	100.335	103.503	98.2942	94.434	97.6475	99.3819	103.606	100.416	100.786	97.3785	104.401	98.8309	96.7251	97.0199	101.985	100.527
6	72.6714	97.9538	97.3164	101.983	99.8415	98.473	106.995	98.2661	102.79	100.197	102.89	101.131	101.356	102.85	99.3111	97.9115	98.6442	103.568	98.8649	101.347	97.6811	99.0951	100.095	101.015	99.3838	102.078	99.9288	99.7096	101.03	102.205	98.8199	97.8712	99.5917	100.613	103.16	98.4737	95.2347	98.5473	100.746	103.796	99.6941	100.785	97.2478	103.438	98.6144	97.4674	96.7127	102.225	100.53
7	72.9209	98.7725	96.8984	102.26	100.881	99.8825	109.736	97.7861	104.413	98.9189	103.569	102.092	101.165	103.96	99.3145	98.0922	99.0542	104.847	100.223	101.072	98.6139	98.7007	99.9787	101.951	100.346	101.859	100.304	99.7404	101.209	102.14	99.2541	99.0533	100.949	101.868	103.513	98.5603	95.5928	100.094	102.211	104.134	99.1238	100.081	98.3708	103.802	99.1037	98.3862	97.3038	102.904	100.547
8	71.6252	98.4565	97.1038	102.871	100.219	98.3664	112.542	97.4414	104.525	99.1607	102.884	102.607	101.745	104.523	98.4418	97.5919	100.594	105.022	101.22	101.416	99.6448	98.9425	100.258	102.032	99.923	102.106	100.945	99.1521	101.856	103.247	99.6404	99.9111	101.042	102.265	102.702	98.0384	96.1531	101.014	102.512	104.481	99.4866	99.8918	98.2786	103.376	99.0441	98.8926	96.1958	103.078	100.6
9	71.44	97.489	96.8621	101.736	98.9629	97.9768	113.473	97.324	104.686	98.3903	103.19	102.893	102.269	105.615	99.3377	97.3468	100.133	105.583	101.421	101.153	100.073	98.7927	100.672	102.236	100.575	102.937	101.015	99.2295	102.394	103.524	99.5441	100.925	100.904	103.75	103.091	97.8692	96.3127	101.491	103.408	104.521	99.661	99.4611	99.3734	103.735	99.5723	99.3971	96.4671	103.599	101.719
10	69.6145	97.2961	96.9188	101.676	99.3343	97.4193	114.997	96.5441	104.417	99.02	102.502	102.914	102.155	105.789	99.7385	97.6231	100.394	106.214	102.335	101.171	100.227	98.41	100.977	102.847	100.462	103.324	100.597	99.7714	102.746	104.557	99.8511	101.585	101.146	104.919	103.267	97.3138	96.5791	101.415	104.493	105.414	98.7611	99.9154	100.694	103.783	99.3616	99.3562	96.2784	103.25	101.426
11	68.1882	96.0599	95.9062	101.459	98.1346	97.8448	116.652	96.082	104.768	98.5315	102.026	102.732	102.174	106.103	98.7634	98.1555	100.562	106.012	102.308	101.009	101.392	99.3319	101.279	103.22	100.726	103.314	100.008	99.2695	102.378	104.742	99.4995	101.755	100.934	105.518	102.378	97.5838	96.2754	100.976	104.718	105.196	99.2139	99.329	101.098	103.763	100.208	99.0229	96.8696	103.751	102.099
12	67.7268	95.1465	96.1016	101.572	97.8959	97.9055	118.651	96.5604	105.414	99.3721	101.514	102.037	102.7	105.382	99.2526	96.6539	101.341	106.504	102.706	101.555	102.056	98.9794	100.99	102.72	101.029	103.551	100.096	98.8253	103.029	105.24	100.576	102.987	101.222	105.515	101.338	97.2102	96.764	101.276	104.759	104.999	99.0176	99.4388	102.139	103.275	100.035	98.8722	96.5332	104.01	102.433
13	67.6481	95.3719	96.0991	101.815	97.5136	97.3819	118.344	96.5447	104.977	98.4445	101.606	101.736	102.659	106.16	99.1654	97.6324	101.578	106.037	102.882	101.989	101.98	99.1332	101.928	103.279	101.326	103.049	99.3079	98.8769	103	106.188	100.446	102.803	101.371	105.279	100.438	96.6542	96.5136	100.822	105.161	105.338	98.3109	98.992	102.128	103.053	99.4975	98.4081	96.5143	104.381	103.268
14	67.0158	94.8673	96.7271	102.139	97.9351	97.0035	119.281	96.5726	105.437	97.9377	101.714	101.526	102.37	106.394	98.7403	97.3694	101.256	105.759	102.481	101.744	102.015	99.0578	101.114	103.008	100.741	103.247	99.496	98.5138	102.375	106.326	101.564	103.365	101.478	106.049	100.284	96.2201	96.6682	100.23	105.369	105.448	98.0458	98.7308	102.592	102.906	100.225	98.077	96.6062	104.258	102.512
15	66.5769	93.9241	96.4483	101.956	96.7918	96.7342	120.371	96.3063	105.619	97.9379	101.751	101.351	102.19	106.421	99.3148	98.2568	101.464	105.163	101.883	101.631	102.232	98.9418	102.288	103.673	101.215	103.07	98.5338	97.9711	102.956	106.215	101.634	103.571	101.193	105.829	100.018	95.7537	97.2906	100.038	105.817	105.349	97.9307	99.049	103.088	103.721	100.443	97.3522	96.75	104.162	103.387
16	66.8734	94.0025	96.6352	101.992	96.7267	96.7211	121.092	94.9054	106.317	97.9861	100.893	100.647	101.98	106.813	98.4643	99.1513	101.468	105.011	101.652	101.173	101.914	99.3103	101.826	103.208	102.04	103.176	98.0265	97.7138	102.389	106.916	101.355	103.3	100.972	105.17	100.485	95.6352	96.8205	99.6771	106.328	105.684	98.4431	99.4777	102.841	104.13	100.539	97.1344	97.0217	104.502	102.735
17	66.6538	93.9221	96.7948	102.642	96.4379	96.6006	121.596	94.5352	105.228	97.7489	100.425	101.065	101.546	106.284	97.7401	98.1028	101.864	104.417	101.315	101.656	102.536	99.4129	101.276	103.323	102.102	103.294	98.9203	97.093	103.165	106.581	101.745	103.134	100.721	105.299	100.332	95.9953	95.9786	99.0166	106.316	105.381	99.043	98.3374	102.822	104.689	101.559	96.4586	96.7901	104.516	102.974
18	67.2664	93.1528	96.7814	102.912	95.7867	96.356	122.115	95.1272	105.679	98.2688	100.875	100.504	100.728	106.192	97.4324	98.6098	101.483	103.102	101.338	102.524	102.384	98.9848	101.251	103.923	102.531	102.749	98.5754	97.0436	103.609	106.471	101.465	102.693	100.525	105.55	100.425	95.8772	95.8429	98.6193	106.346	104.741	99.2307	98.1138	104.154	104.105	101.27	96.1361	97.0706	104.724	103.143
19	67.6025	92.7979	96.4178	102.801	96.081	95.6748	122.568	94.8762	105.522	98.9249	100.722	100.425	100.866	106.262	97.6572	97.7444	101.068	102.951	101.022	102.088	102.426	98.8715	101.493	104.199	102.543	102.591	98.5355	97.6964	102.531	107.338	102.464	102.607	100.194	105.165	100.379	95.2487	95.8257	98.9172	106.859	104.81	98.5545	98.2914	104.368	104.027	101.835	95.8434	97.2415	104.369	102.812
20	67.7886	92.2771	96.5267	102.737	95.8968	96.3879	123.163	95.0061	106.158	98.9099	100.962	99.8846	99.9444	105.885	98.3929	98.5382	100.853	102.91	100.968	103.198	103.212	99.1312	102.278	104.445	102.814	103.115	97.8532	96.9896	102.642	106.449	102.625	102.436	100.177	105.466	100.563	95.4585	95.7557	98.4245	107.118	103.416	98.9135	98.1161	104.698	103.924	102.073	96.207	97.3148	104.68	102.535
21	68.4931	91.9505	96.4274	103.041	95.4081	96.8796	124.511	94.4288	106.198	98.1241	100.663	99.8288	99.4107	105.936	98.1288	98.2696	100.402	103.181	100.844	102.651	102.755	98.3598	102.157	104.753	102.669	102.753	97.7632	97.0655	103.019	106.738	102.811	102.305	100.051	105.274	100.54	95.3163	95.4798	97.7383	107.314	104.402	98.4551	97.8568	104.293	104.371	101.805	95.7934	97.6945	104.545	102.296
22	68.4063	91.8916	96.317	103.056	95.176	96.3795	124.785	95.1527	106.173	97.921	100.779	99.6381	98.8717	106.633	97.8909	97.7088	101.654	102.795	100.948	102.827	103.045	98.5467	102.696	104.711	102.523	102.902	97.9645	97.1162	103.545	107.428	102.857	103.038	100.432	105.526	100.702	95.6178	95.6558	98.3963	107.404	103.572	97.9647	98.1673	104.76	103.936	101.7	95.221	97.3075	104.384	102.643
23	68.4111	91.3034	96.1309	103.139	95.7475	96.4201	124.133	93.0562	105.477	97.4746	100.843	99.387	98.8291	105.151	97.4261	96.8557	100.592	103.336	100.959	103.255	102.793	98.5643	102.47	105.006	102.994	102.676	97.8398	96.8128	103.317	106.714	103.246	102.628	100.137	105.448	101.115	95.0886	95.6065	98.0993	107.473	103.467	98.2151	98.3088	104.8	104.09	101.737	95.2189	97.3603	104.004	102.857
24	68.9556	91.8888	96.1951	104.087	95.4569	96.5332	124.633	94.0799	105.954	97.9595	101.324	99.1386	98.6551	105.522	97.2257	97.4893	100.989	102.252	100.87	103.493	103.036	99.0989	102.579	105.18	103.139	102.462	97.5479	96.8502	104.29	107.15	102.531	102.47	100.375	105.389	100.902	95.3439	95.7114	97.9571	107.549	103.529	97.7984	97.7231	104.741	103.938	101.928	95.5443	97.4616	104.392	102.805
25	69.447	91.0298	95.7586	103.961	95.392	96.3196	124.953	94.9772	105.324	97.6169	101.493	98.8272	98.3145	105.162	97.261	96.8714	101.292	101.765	101.023	104.401	103.244	99.0718	102.651	105.467	102.686	102.888	97.0557	96.7237	104.944	107.334	103.326	102.487	99.7072	105.648	100.62	95.3853	95.5206	97.5927	107.84	103.246	98.1339	97.9611	104.73	104.14	102.177	95.543	97.7086	104.897	103.673
26	69.5896	91.2637	95.9565	104.051	95.5028	96.0347	124.87	93.9612	105.37	98.4946	101.708	98.84	97.3806	106.412	97.2531	96.2526	100.167	101.775	101.34	103.876	104.228	99.3259	102.447	106.083	102.778	102.279	97.6112	96.7123	105.53	106.699	102.875	102.881	99.7557	106.475	101.07	94.7951	94.7859	97.0503	107.961	103.582	98.5143	97.7175	105.175	104.09	102.262	95.1419	97.9909	104.325	103.666
27	70.3898	90.6831	95.7254	104.585	94.8588	97.3312	123.789	93.421	105.636	98.5527	101.013	99.3	97.201	106.268	97.3088	96.098	100.712	102.541	100.503	104.494	103.518	99.2134	103.251	106.807	103.729	101.893	97.3289	96.0659	105.397	107.226	102.987	103.111	99.773	106.771	101.234	94.8748	94.2798	97.2345	108.296	102.96	98.6362	97.3634	105.532	104.025	101.806	95.1693	98.2177	104.796	103.281
28	70.549	89.9367	95.7491	105.669	95.0737	96.5142	124.227	93.4248	105.297	98.6186	102.261	98.9216	96.8732	106.33	98.1489	95.9419	101.472	103.103	101.082	103.527	104.344	99.1135	103.498	106.595	103.302	102.309	97.3816	96.1634	106.497	107.116	102.707	103.425	99.4001	106.973	100.875	94.719	94.7308	97.7598	108.39	103.812	97.5719	97.4716	105.56	104.225	102.147	94.6414	97.7196	104.799	103.312
29	70.5018	89.4773	95.6602	105.175	94.6729	96.1628	123.777	93.2753	105.422	98.6255	101.634	99.1898	96.8471	106.238	97.9497	96.2484	102.053	102.876	100.766	104.175	104.435	99.5636	103.229	106.881	102.947	102.853	96.6613	96.1955	107.595	106.675	103.306	102.839	99.511	106.541	100.591	93.785	94.709	97.7059	108.469	103.602	98.0684	97.2981	105.653	104.167	101.576	94.7587	97.9241	105.069	103.486
30	71.8037	89.4142	95.8881	105.686	94.8594	96.4302	124.642	93.6491	105.336	98.8644	101.936	99.1086	96.3948	106.158	98.2224	95.5361	101.258	102.234	101.14	104.115	103.352	99.7953	103.834	106.96	102.834	102.955	96.8548	95.8058	108.056	106.863	102.708	103.246	99.8625	106.792	100.813	94.3539	94.1273	97.5106	108.114	102.934	98.0749	97.3244	105.865	103.807	101.828	94.5102	98.312	104.945	103.112
31	73.2905	88.8173	95.2551	104.757	94.6198	96.2039	124.179	93.5738	105.134	99.132	101.879	99.0743	97.0224	106.512	98.3326	96.7291	101.375	102.555	101.054	103.976	104.106	100.17	103.408	107.515	103.037	103.078	96.9868	96.2133	108.055	106.787	102.575	102.977	99.6095	106.409	101.114	93.9212	94.5503	97.3267	107.982	103.698	98.1336	97.3317	105.406	104.219	101.658	94.4168	97.7495	104.968	103.751
32	71.7051	88.9285	95.0565	105.517	94.8958	96.0043	124.164	93.7705	104.915	99.2451	102.17	98.9369	95.7761	106.881	97.8343	95.8631	100.378	101.455	100.917	103.904	104.649	100.527	103.679	108.051	102.989	103.22	95.7671	96.6844	107.419	107.344	102.802	103.11	99.7816	107.128	101.107	93.9955	94.1637	97.7598	108.807	103.956	98.7972	96.818	105.504	103.436	101.507	94.2817	98.1387	105.371	103.636
33	72.4569	88.8534	95.137	106.14	94.3101	96.6509	123.72	93.8767	104.871	99.5337	102.124	99.1733	96.5937	106.028	97.2197	96.4328	101.791	101.982	100.971	103.917	103.908	100.263	103.798	108.373	103.048	103.093	96.7352	96.5735	107.431	107.202	102.899	102.857	99.8131	106.778	100.71	93.8367	94.3968	97.8112	108.686	103.287	98.9412	97.0532	105.365	103.518	101.605	94.3817	98.5867	104.526	103.483
34	73.0592	88.6961	94.7652	106.271	93.638	96.4367	123.565	93.6477	104.579	100.422	101.372	98.5519	96.3487	105.582	97.7242	96.9433	101.758	102.264	100.739	103.726	103.982	101.144	103.783	108.857	103.301	103.453	95.4569	96.7662	107.413	107.783	103.426	103.293	100.007	106.351	101.033	94.0426	94.9745	98.2089	107.916	104.068	99.2471	96.2106	104.908	103.303	101.162	94.4065	98.4393	104.937	104.169
35	73.3457	87.808	94.7898	106.091	94.1174	95.7111	123.005	93.0651	104.747	100.701	102.218	98.7034	96.9134	105.999	97.5121	96.2707	101.599	101.895	100.752	104.202	104.33	101.528	103.522	108.702	102.408	103.853	95.4219	96.8168	107.493	106.895	103.62	102.83	100.053	106.335	100.841	93.8665	94.4988	98.417	107.205	104.052	99.1577	96.0507	105.722	103.187	100.881	94.0054	98.4141	105.175	104.395
36	74.226	88.1975	95.0756	106.437	94.5044	95.9987	122.873	93.266	103.968	99.541	102.926	98.7277	96.0583	106.045	96.6751	96.2289	102.395	101.822	100.561	103.476	103.886	101.444	103.856	109.231	102.565	103.812	96.2057	97.0396	107.023	106.744	104.258	102.15	100.442	106.495	100.373	94.341	94.5185	98.751	107.191	103.527	98.8391	95.6714	105.576	102.649	100.863	94.4159	98.2724	105.053	104.788
37	75.4199	88.1411	94.9752	106.387	94.3938	96.054	123.241	93.8425	104.201	100.023	102.522	98.2685	96.1834	105.729	96.8857	96.3373	102.105	101.314	100.308	103.85	103.571	102.138	103.971	109.764	102.59	103.713	95.5824	96.9143	107.369	106.478	103.996	102.286	100.144	107.034	100.292	94.5933	95.1988	98.9169	106.842	103.122	98.772	96.0582	105.556	102.84	101.321	94.5743	98.8053	105.062	104.231
38	75.7469	88.4172	94.1154	105.624	93.7708	96.0323	123.019	93.0879	103.651	99.8268	102.527	98.5296	96.6232	104.461	97.2327	96.1881	102.532	101.18	100.048	102.957	102.923	102.169	103.716	110.124	103.107	104.429	95.798	97.3483	107.506	106.696	104.318	101.974	100.681	106.71	100.57	94.7741	95.0989	99.1793	106.814	102.845	98.706	95.2006	105.877	102.652	100.551	94.8365	98.3925	105.45	104.378
39	76.0498	87.1572	94.047	105.872	94.4687	95.9283	125.1	92.7889	103.199	100.122	102.167	98.4824	96.2693	105.095	96.9052	97.0568	101.918	101.678	100.238	102.965	102.822	102.732	103.73	109.157	102.474	104.655	95.8516	97.067	107.644	106.749	104.175	101.872	100.4	106.939	99.6495	95.0744	94.7917	99.7098	106.566	102.867	98.8135	94.949	106.537	102.345	100.514	94.7371	98.226	105.685	104.672
40	76.2857	87.8661	93.7875	105.849	94.6037	95.7281	124.874	93.6617	103.33	100.063	103.084	98.4377	97.1261	105.484	96.816	96.7034	102.548	101.17	100.468	102.448	103.625	103.673	104.741	108.987	102.881	104.927	95.5422	96.8902	107.531	106.679	104.152	101.3	101.015	106.655	99.5498	94.749	94.5449	99.989	107.066	103.254	98.9615	95.003	105.97	101.651	100.224	95.0998	98.5527	105.599	105.105
41	76.7345	88.0123	93.7952	106.645	94.8672	96.2085	125.099	93.0174	102.999	99.639	103.285	98.4175	96.7759	105.398	96.8897	97.1088	102.569	102.095	100.297	102.675	103.494	104.363	104.223	109.299	102.708	104.484	95.7554	97.3335	107.45	107.109	104.091	100.615	101.062	106.573	99.7289	94.4981	94.3331	100.055	106.418	102.19	98.5781	94.8714	106.121	101.16	99.9175	95.5315	98.7366	105.629	105.528
42	77.0578	87.569	93.3017	105.961	94.4761	95.7881	126.209	93.5274	102.548	100.225	102.969	98.5633	96.9155	104.762	96.8803	97.2984	103.565	103.091	100.399	103.119	102.799	104.479	103.499	109.011	102.333	104.896	95.6752	97.3144	107.872	106.6	104.09	100.569	101.336	106.467	99.8757	94.2627	95.0379	100.645	106.458	102.031	99.5807	95.5376	105.628	101.834	100.999	95.7916	99.3288	105.857	104.876
43	77.0374	87.5719	93.4858	105.131	95.5549	95.8542	126.296	93.1138	101.894	100.476	102.255	98.1432	96.9129	106.048	96.8644	96.5256	103.06	102.293	100.306	102.973	102.58	105.11	104.534	109.278	102.535	104.928	95.2815	97.1705	108.714	106.127	103.934	100.974	101.406	106.53	99.8628	94.3187	94.7486	100.498	105.919	102.468	99.0821	95.0544	106.633	102.426	100.268	95.5542	99.1564	106.153	105.435
44	77.7854	87.8903	93.2381	105.074	95.5368	96.1645	126.753	92.9124	101.48	101.089	101.444	98.5668	96.5237	105.357	96.8579	97.4844	102.782	103.408	100.132	102.76	102.113	105.688	104.854	109.022	102.493	104.459	95.0789	97.0924	108.467	106.133	103.873	100.606	101.33	106.466	99.9188	94.0609	94.6225	100.935	105.92	102.194	99.0883	94.4234	105.872	102.934	100.183	95.6249	99.1339	106.078	105.597
45	78.3179	88.1202	92.9867	105.04	94.8635	95.914	128.308	92.9009	101.93	99.7959	101.605	98.2945	97.3896	104.972	96.2405	97.5405	102.707	103.825	99.563	101.684	102.109	105.59	104.216	108.607	102.111	104.861	94.9376	96.7423	107.93	106.017	103.824	100.118	101.405	106.413	99.923	93.6673	95.1126	100.809	105.889	101.961	99.2819	93.9871	105.898	101.932	100.401	96.025	99.4702	106.497	104.804
46	78.3757	88.1543	92.7082	104.603	95.3674	95.3429	128.189	92.5032	100.995	99.7881	101.049	98.1718	97.1074	105.272	96.1651	98.0826	102.54	104.396	99.3928	101.387	101.633	105.955	104.481	109.188	102.393	104.813	95.4676	97.2278	107.864	105.411	103.573	100.527	101.113	105.699	99.5276	94.0293	94.6659	100.84	105.098	101.488	99.7245	94.1266	105.588	102.593	100.65	96.3642	99.7815	106.42	105.133
47	78.6336	87.8047	93.3385	104.367	95.8121	94.487	129.113	92.2228	99.752	100.531	101.136	98.1926	97.6671	105.465	96.8626	96.3629	103.123	104.23	99.5062	100.23	101.323	106.09	103.901	109.13	102.347	105	95.934	96.8617	107.143	105.824	103.289	100.743	100.909	105.651	100.484	94.7622	95.0039	101.136	105.225	101.657	99.8727	93.7724	105.877	102.334	100.14	96.8803	100.282	106.884	105.401
48	78.6256	88.1302	93.0547	104.083	96.2988	95.3602	128.226	93.1801	99.979	100.319	100.533	98.3951	97.9669	106.064	97.0266	96.0798	102.819	104.293	99.7148	100.635	101.098	106.127	103.884	108.722	101.519	104.825	95.6149	96.9341	106.805	105.801	104.049	100.22	100.111	105.97	100.395	94.5932	94.942	101.12	105.434	101.341	99.7287	93.5236	105.588	103.053	100.149	97.0438	100.118	106.485	106.415
49	79.4616	88.9485	93.5191	104.162	95.8198	94.7921	128.354	92.4955	99.5816	99.8996	100.014	98.4359	97.9919	105.908	96.2565	94.4274	102.491	105.176	99.7156	101.553	100.893	106.342	103.695	109.145	101.601	105.11	94.9598	96.9545	106.904	106.311	103.864	100.794	100.452	106.224	100.023	94.1267	95.6281	101.486	105.132	101.571	99.5642	93.8182	106.172	103	99.8678	97.2847	100.704	106.973	105.736
50	79.9087	88.3925	93.084	103.97	95.5976	95.1173	129.097	92.6619	99.5305	99.9892	100.904	98.4459	97.5463	106.016	96.3646	94.7132	102.019	104.258	99.9054	101.463	100.885	106.602	103.923	109.309	101.612	104.468	95.1496	96.9265	106.505	106.109	104.424	100.612	100.554	105.84	100.559	94.2041	95.4382	101.577	105.082	100.836	99.9073	93.6548	105.607	102.833	100.956	97.2275	100.672	106.315	106.783
51	80.8546	88.4312	93.2209	103.443	96.1153	95.2941	128.562	92.8142	98.5186	100.614	100.777	98.8644	98.0308	105.529	95.9447	95.859	102.945	103.437	100.38	101.371	100.417	106.237	103.858	108.97	102.209	104.758	95.2727	97.1239	106.284	105.936	104.657	100.532	100.208	105.716	100.613	93.36	95.5295	102.09	104.199	101.648	99.6729	93.928	105.896	102.85	101.243	97.258	101.731	106.412	107.009
52	80.2897	89.4329	93.3896	103.22	96.5569	95.0471	127.815	93.2262	98.4838	99.763	100.54	98.7788	98.3457	105.211	95.7349	94.9464	103.22	103.758	100.126	101.666	98.8004	106.605	103.925	108.529	101.681	104.471	95.4168	96.8927	106.137	105.897	104.452	100.559	99.5624	106.276	100.645	93.8084	95.4236	102.328	104.11	100.134	100.618	93.6186	106.074	102.791	100.665	97.5036	101.371	107.153	108.009
53	80.2343	89.3865	93.8179	102.773	96.1483	94.6657	128.874	93.9752	98.5469	99.9478	100.343	98.534	98.5062	105.608	95.5968	95.701	103.039	102.772	100.503	101.481	100.315	107.025	104.581	108.786	101.107	104.252	94.7228	97.1032	105.84	105.636	104.164	101.207	99.5774	106.323	100.704	94.1297	96.0737	102.33	104.277	99.7174	100.116	94.0242	105.746	103.034	101.901	97.6261	101.292	106.829	107.21
54	81.091	89.1092	93.4889	102.642	97.0597	95.0119	130.296	93.797	97.719	98.5751	100.23	98.423	98.8465	105.694	95.5449	96.8855	103.951	103.633	99.787	101.187	99.2755	106.512	105.292	108.468	100.962	104.046	95.9671	97.376	106.226	106.267	104.542	101.223	99.7962	105.699	101.114	93.9707	96.0449	102.438	103.834	100.71	100.644	94.5732	106.993	102.892	102.046	97.9104	102.137	107.284	107.145
55	81.2753	89.9203	93.5777	102.538	96.6769	95.187	129.215	94.0637	97.6155	98.5625	99.9054	98.1822	99.181	106.29	95.3208	96.7864	103.984	103.356	99.7184	101.641	100.211	106.709	105.111	108.336	101.308	104.183	95.4131	97.2672	105.866	105.934	105.586	101.704	99.98	105.757	101.552	94.1342	95.6269	102.577	103.833	100.401	100.811	94.2478	106.676	102.902	102.541	98.1177	102.509	107.314	107.216
56	81.8813	89.9113	93.4438	102.771	97.1711	95.4918	129.348	94.0886	97.5794	98.1183	99.504	98.1938	99.5897	105.557	95.4887	98.0199	103.935	103.331	99.9587	101.777	100.323	107.181	104.65	108.378	101.508	104.151	95.4904	97.6044	105.691	106.102	106.096	101.409	99.9523	106.287	102.483	94.691	95.8874	102.687	104.131	100.343	101.357	94.9362	106.839	103.143	102.509	98.3752	102.365	107.28	107.557
57	81.5635	89.6099	93.6353	102.591	96.5898	95.3381	128.961	95.0484	97.7406	98.0677	98.8766	97.8689	99.011	105.799	96.0101	96.4649	104.268	103.604	99.7049	101.249	99.7182	107.384	104.567	108.789	101.568	104.467	95.9181	96.9706	105.683	106.055	105.96	100.756	99.2344	106.181	102.975	94.8921	96.0053	103.22	103.454	100.874	100.716	95.4173	106.78	103.127	102.059	98.5514	103.569	106.934	107.885
58	81.84	90.1949	93.3746	101.605	97.0962	95.8933	129.528	94.639	97.0844	98.4965	99.0341	98.4501	99.3765	106.177	96.5287	96.0333	103.979	103.882	99.3084	101.652	100.514	107.33	105.056	108.672	101.455	104.157	95.7604	96.8311	105.694	106.211	106.222	100.725	99.468	106.552	103.401	94.7415	96.0379	103.071	102.933	100.298	101.284	94.703	106.866	102.789	102.502	98.5124	103.156	106.441	108.368
59	82.538	90.9742	93.5539	102.117	97.114	95.6337	129.759	95.317	97.7149	98.82	99.413	98.1525	98.9774	106.265	95.3511	96.8047	104.975	104.914	99.2498	101.394	99.747	107.523	105.091	107.97	101.923	103.691	96.1023	97.001	105.693	106.055	105.769	101.023	99.2592	106.543	103.716	95.1644	95.9692	103.53	102.982	100.718	101.525	94.8695	106.812	102.871	102.494	98.3455	103.488	107.117	108.485
60	81.6418	90.2991	93.8535	101.827	96.6889	95.7282	129.675	95.4378	97.1118	98.524	99.6522	98.8137	98.6494	106.968	95.8744	96.2534	106.201	104.784	99.5357	101.141	100.615	107.582	105.257	108.104	102.624	103.952	96.4158	97.3594	105.42	105.856	106.222	100.798	99.3642	106.238	104.378	94.7794	95.8227	103.148	102.014	100.699	101.794	94.8511	105.989	103.056	101.549	99.1631	103.283	106.748	108.03
[truncated: 31 more columns]

## Sheet: control round
position	1	1	1	1	1	1	1	1	2	2	2	2	2	2	2	2	2	2	3	3	3	3	3	3	3	3	3	3	3	4	4	4	4	4	5	5	5	5	6	1	1	1	1	2	2	2	2	2	2
cell	1	3	4	5	6	7	10	11											1	2	3	4	5	6	7	8	10	11	12	1	3	5	6	7	1	2	3	6	3	1	2	3	4	1	2	3	4	5	6
t (min)
0	100	100	100	100	100	100	100	100	100	100	100	100	100	100	100	100	100	100	100	100	100	100	100	100	100	100	100	100	100	100	100	100	100	100	100	100	100	100	100	100	100	100	100	100	100	100	100	100	100
1	99.6533	99.0716	99.8427	100.503	100.285	98.9585	99.7414	100.848	99.6888	99.2134	99.3977	100.193	99.6609	98.9561	100.401	100.234	100.329	100.532	98.7285	99.2496	100.113	99.2239	99.7381	99.2031	99.9764	99.7484	99.7776	98.2935	98.3479	98.9038	100.426	99.5328	99.4218	99.7679	100.52	100.832	102.165	98.9338	99.498	99.9862	100.728	100.125	100.021	101.068	99.1686	99.8645	99.4166	100.379	100.208
2	98.8747	99.0066	99.3282	100.549	100.466	97.5552	99.3818	101.371	99.3947	98.9112	98.156	100.384	99.4046	98.562	100.597	100.154	99.8962	100.163	98.8882	98.8553	101.61	99.1534	98.6593	98.4792	99.6104	99.942	99.0645	97.8744	98.5297	99.5279	102.332	99.6113	99.4537	100.307	100.072	101.237	102.871	97.2193	99.1696	100.487	101.389	101.001	100.733	101.787	98.2129	99.8801	99.0985	101.056	101.499
3	99.1843	97.5451	98.0927	100.586	100.603	97.4371	98.3875	100.908	98.1891	98.9042	98.2698	100.053	99.7014	98.9777	100.721	100.644	99.5237	99.5649	98.4676	99.8852	100.711	98.9579	98.4846	98.3528	99.3649	99.9805	98.7158	96.5115	98.3282	99.0703	101.671	98.6884	98.5506	101.344	99.0607	101.42	103.734	98.6215	97.9048	100.012	101.549	101.629	101.529	102.233	97.6395	99.6664	98.3495	101.551	101.693
4	99.5943	98.5058	98.3548	100.753	101.202	97.0212	97.8503	101.397	98.1164	98.3449	98.7848	100.672	99.9992	98.3573	100.438	100.903	99.4288	100.491	97.8355	100.494	101.711	99.0987	98.2507	98.4941	99.774	100.284	98.2726	96.8325	98.1337	99.0841	102.849	98.763	98.2437	101.095	98.7974	101.893	104.489	98.6506	97.1599	99.8716	101.885	102.475	102.376	102.786	97.167	99.7542	98.2275	100.702	100.72
5	100.827	100.539	99.3343	101.85	102.011	95.9664	99.6612	103.737	96.4279	98.8483	98.3514	100.73	100.737	97.3522	101.224	100.767	101.481	101.261	99.02	99.6659	103.057	104.724	99.0395	99.4731	101.211	100.898	98.8674	97.819	97.896	100.982	106.196	97.017	99.3591	100.072	98.7591	101.5	106.902	98.7893	98.1431	100.871	102.185	103.578	102.91	102.632	96.8887	101.234	97.5193	101.015	101.744
6	101.381	100.239	100.001	102.556	102.918	96.1895	100.501	104.12	98.1666	101.115	99.1271	101.422	101.852	98.7151	103.202	101.911	101.997	101.716	100.626	100.74	104.287	105.753	100.426	99.5806	102.24	101.368	99.6006	98.2502	98.2304	101.831	105.193	99.2041	101.32	101.075	99.7555	102.36	108.588	100.22	98.7039	101.583	102.44	104.526	103.801	103.231	96.8779	101.816	97.3392	101.735	102.733
7	101.319	100.467	99.7046	103.547	102.865	96.7551	100.834	103.778	98.0788	102.022	99.3625	101.314	101.874	100.165	102.589	102.744	103.21	101.924	100.706	101.093	104.866	106.08	100.461	100.27	102.042	102.441	99.736	97.5659	98.5024	102.07	104.537	98.4471	101.501	101.16	100.275	102.037	107.334	100.216	98.1622	102.937	102.575	104.827	105.098	103.808	96.4394	102.167	97.1818	101.664	102.4
8	102.72	99.8747	99.2558	103.516	103.128	97.0342	100.761	104.96	97.5275	101.629	98.8012	101.052	101.577	99.9455	102.305	103.13	103.149	102.125	99.9432	101.046	105.163	106.568	100.603	100.668	102.105	101.809	99.3511	97.8977	97.8956	102.3	105.371	99.1339	100.321	102.1	99.0855	102.095	108.021	99.4191	98.0425	102.603	102.561	104.44	105.163	103.68	97.0766	102.258	97.4517	102.476	102.837
9	103.966	99.8087	98.7002	103.529	103.093	97.3442	100.965	104.015	97.3357	100.705	99.1751	101.224	101.437	100.07	102.192	103.21	102.069	101.824	99.8816	101.043	105.576	106.337	99.9885	99.6537	101.41	101.784	98.8933	97.7569	97.1969	102.744	105.013	98.6027	99.1744	102.212	99.3208	101.155	106.607	99.2994	98.3471	103.586	102.512	104.612	105.006	103.65	96.7467	102.175	97.4449	102.059	103.364
10	104.575	99.0586	98.7294	104.092	102.563	96.3268	99.6287	103.933	96.0554	100.13	98.2226	100.082	100.75	99.4119	102.378	103.915	102.029	100.97	99.8655	101.658	105.124	105.958	98.955	98.8096	100.912	101.549	98.3278	96.8985	97.3858	102.406	105.808	98.7512	98.57	101.643	99.0893	101.557	106.922	98.0846	97.4719	103.365	102.694	104.944	104.94	103.322	96.5523	102.43	97.2484	102.853	102.937
11	106.45	98.1391	98.8353	105.139	101.866	95.5504	100.32	103.527	96.0671	100.246	97.4217	100.092	100.915	98.8419	102.491	104.672	101.175	101.397	99.5225	101.214	105.056	105.043	98.2655	98.5849	101.33	101.547	98.1191	96.2316	97.2299	102.456	105.282	96.7838	98.2316	102.749	98.1481	100.587	107.586	98.8486	98.1584	103.438	102.802	104.787	105.633	103.825	96.5519	102.426	97.135	102.224	102.484
12	107.138	98.5785	98.1484	103.729	101.717	95.4667	98.4768	103.416	96.0505	100.213	97.6508	99.8216	100.636	99.4784	102.241	104.619	100.684	100.987	98.9993	101.609	104.739	106.07	98.1653	98.372	101.043	101.411	97.5404	96.1549	96.384	101.646	106.235	97.7334	97.7786	101.306	98.6714	100.82	107.25	97.7034	97.2973	103.364	102.73	104.665	105.075	103.132	96.491	102.296	96.9266	101.689	102.462
13	107.163	98.0806	98.1473	104.629	101.292	95.0921	98.5942	103.441	95.7277	99.455	97.0198	99.5446	100.655	99.5261	102.208	105.479	100.269	100.291	99.1135	101.842	105.373	105.87	97.7649	97.8523	100.508	101.365	97.6447	95.7671	95.5491	100.901	106.345	97.1581	97.674	101.662	97.8709	100.31	107.445	97.286	96.9989	103.509	102.324	104.739	105.18	102.157	96.3012	102.251	96.6357	101.226	102.756
14	107.188	97.6286	97.8527	104	101.442	95.792	98.9394	103.053	96.4092	98.9133	97.0717	99.9835	100.151	99.2025	102.352	105.619	99.625	101.064	99.1307	101.378	105.242	106.502	96.8468	98.2597	99.7497	101.931	97.4583	95.5231	95.1688	101.903	107.055	96.9944	98.3878	102.008	97.9431	100.689	107.268	98.8975	97.4363	104.038	102.996	104.854	104.519	102.695	95.8306	102.149	96.7738	101.776	102.027
15	107.706	97.5266	97.3732	103.795	100.5	95.7746	98.5841	102.709	95.5436	98.9777	97.2628	100.096	99.5679	99.4695	102.323	105.78	99.1033	100.306	98.4815	101.135	104.636	105.799	96.2079	97.971	99.1284	101.225	97.6978	94.509	94.6495	100.976	108.562	97.4931	97.9505	102.374	97.1152	100.44	107.008	98.0441	97.1931	103.034	102.51	105.092	104.286	102.841	96.3326	102.007	96.8498	100.867	102.133
16	107.085	97.2947	97.4808	103.833	100.653	95.7018	98.4487	102.74	95.5354	98.2319	97.0915	99.3139	99.8226	99.2787	102.138	106.611	98.932	100.02	98.1547	101.201	104.143	105.898	96.359	97.1709	98.7826	101.623	96.8527	94.4885	94.9394	101.734	108.257	96.5638	98.3104	102.205	98.0567	100.094	106.577	98.2758	97.4227	103.679	101.526	104.545	104.175	101.685	96.1379	102.207	96.5112	101.408	102.046
17	108.133	97.2239	97.1112	103.868	100.326	94.9927	98.0033	102.391	94.5804	98.1697	96.5452	99.7745	99.7219	98.8376	102.445	106.686	98.3273	99.9012	97.7956	100.906	104.694	105.316	95.978	97.8224	98.9885	101.863	96.5791	94.9975	95.5944	100.756	108.827	97.0937	96.83	100.889	97.8696	99.7656	105.643	97.8717	96.7323	103.379	101.444	104.88	103.528	102.147	96.4322	102.563	96.5458	100.06	101.946
18	108.039	97.7854	97.3993	104.283	99.9493	95.4191	97.6872	101.271	94.422	98.517	96.4847	99.5975	99.5915	98.6887	102.051	106.531	98.6152	99.7855	97.8637	101.744	104.683	104.938	95.5881	97.1849	99.7659	101.776	96.8339	93.9492	95.5188	101.142	108.823	97.3516	96.829	101.744	98.0145	99.9616	105.807	97.712	96.3698	103.197	101.647	104.266	103.333	102.351	96.1707	101.721	96.153	99.5795	101.755
19	107.48	97.6927	96.1578	104.483	100.292	95.2345	98.0354	101.374	94.3165	98.4485	95.5699	99.6661	99.749	98.8041	102.086	106.089	98.3904	100.129	98.1529	101.331	104.339	105.303	95.5302	97.2064	99.5987	101.292	96.3276	94.479	94.5246	101.457	109.54	97.3216	96.299	101.307	98.5236	100.521	105.761	97.633	96.7314	102.485	101.052	104.707	103.771	101.182	95.9041	101.5	96.6051	99.7909	101.275
20	108.189	96.8204	97.2628	103.936	100.486	95.5512	97.874	101.977	94.8053	98.5355	96.4923	99.9222	99.6156	98.3397	102.827	106.378	99.01	100.415	97.556	101.186	103.748	105.476	96.0539	97.2337	100.061	101.571	96.8438	94.4198	94.9984	100.091	109.535	98.4465	97.9566	100.589	99.0126	99.2872	107.007	97.2665	96.8025	102.742	101.056	104.145	103.428	102.168	95.874	101.469	96.1303	99.4313	101.033
21	108.969	97.0884	96.4491	103.932	100.185	94.8456	98.133	102.015	94.1748	98.5134	96.503	100.164	99.4771	98.7924	102.892	106.771	98.382	99.7802	96.9005	100.607	103.94	105.992	95.5676	97.7758	99.7626	101.419	96.3742	94.8673	94.5198	100.312	109.366	98.2794	97.1983	100.497	99.6239	99.779	108.116	97.8189	97.2738	102.379	100.57	104.117	102.819	101.413	96.0402	101.589	95.9132	100.505	101.425
22	108.436	96.7983	96.607	103.538	99.8639	94.8251	98.315	101.627	94.5217	98.4273	96.0942	99.7442	99.3131	98.0626	102.672	106.253	98.9438	100.501	96.8862	101.09	104.357	105.777	95.2677	97.9193	99.9264	101.743	95.9909	94.3349	94.8504	100.45	109.965	99.9261	98.47	100.553	98.7908	100.381	106.288	97.6177	97.0398	102.785	101.031	103.558	103.073	101.489	95.4099	101.759	95.4111	100.429	100.647
23	108.235	96.5924	96.2216	103.921	100.34	95.0546	97.5309	102.396	94.1022	98.6998	96.6574	100.106	99.9795	98.3712	103.47	106.971	99.7211	100.515	97.6456	101.041	103.791	104.546	95.8239	97.8752	99.4971	102.276	96.2164	93.8641	94.9931	100	109.568	100.072	97.1767	100.476	99.344	100.392	105.823	97.4219	96.0629	102.029	101.142	103.524	102.471	101.14	95.3658	101.48	95.6048	99.9643	101.765
24	107.887	96.7005	96.1231	105.174	100.403	94.7012	97.3887	102.664	94.1691	98.6868	97.2937	100.251	99.1004	98.6158	103.352	106.334	100.134	100.446	97.5786	101.859	103.845	105.497	95.6391	97.8878	100.314	102.122	96.5142	94.6938	95.4084	100.33	109.718	100.291	98.175	100.411	99.106	100.206	106.516	97.687	95.8841	102.409	100.71	103.89	102.488	101.417	95.3179	101.962	95.7541	99.6286	100.73
25	108.393	97.0315	96.5413	104.523	100.117	94.3934	97.9245	102.493	94.3871	99.3723	97.3092	100.619	99.7197	98.0479	103.862	106.483	99.8794	100.739	97.1158	101.389	103.322	104.321	95.5624	97.8064	100.378	102.576	96.563	94.4679	94.823	99.6993	110.574	100.442	98.9656	100.768	99.3547	99.8298	106.042	97.9422	96.7427	102.269	101.074	103.692	103.115	101.659	95.2739	101.862	95.498	99.4836	101.397
26	109.518	96.5851	95.8634	104.155	100.314	94.5552	97.853	102.711	94.1167	98.9667	96.8737	100.77	99.4672	98.1921	103.296	105.752	99.5308	99.9948	97.0261	101.546	104.625	105.671	95.4403	97.1878	100.587	101.784	96.0446	94.3108	95.3044	99.8575	110.692	100.461	99.5647	100.686	100.365	100.312	107.799	97.5517	96.981	102.037	100.806	103.764	101.749	101.394	95.0428	101.283	95.603	99.5591	101.8
27	108.869	96.531	96.6556	104.195	100.635	94.2782	98.621	102.525	94.2222	99.5891	96.8011	101.017	100.029	99.0939	103.936	105.833	99.8252	100.896	97.5339	101.218	104.114	104.828	95.9764	98.2237	100.498	102.542	95.8384	93.6195	95.6124	100.935	110.973	100.275	98.1436	100.551	100.36	99.5233	105.504	97.2309	96.3783	102.634	100.141	103.705	102.594	101.07	94.9677	101.328	95.811	99.2646	101.337
28	108.79	96.8909	96.067	105.102	101.111	94.0333	97.9216	103.311	94.1022	99.0861	97.1529	101.618	99.7509	98.3464	104.312	105.794	100.162	100.523	97.2854	102.25	104.871	105.622	96.2621	98.0862	99.8718	102.619	95.5426	94.7822	96.0118	100.557	110.787	100.482	99.8175	100.958	100.097	100.022	105.692	97.7844	96.2288	102.511	100.237	103.283	102.829	101.495	94.8731	101.29	95.4364	99.2359	101.807
29	108.772	96.9493	96.1882	103.831	101.238	94.4923	97.996	102.948	94.1515	99.8639	97.0002	101.113	99.9135	98.8354	105.037	106.143	100.165	100.448	97.231	102.426	104.288	105.96	96.3466	97.9389	100.077	102.809	96.3893	94.3887	95.1975	100.477	111.298	100.612	99.2016	101.643	100.803	99.8438	107.182	98.5187	96.2411	103.129	100.208	103.446	103.028	101.145	94.434	101.162	95.6666	98.5732	100.779
30	108.857	97.4264	95.9888	104.536	101.574	94.3427	97.0338	102.604	94.4801	98.9404	96.981	101.678	99.4994	98.9026	105.245	105.469	100.216	101.063	96.6139	102.888	105.211	104.959	96.806	98.3805	100.046	102.464	96.3675	94.6595	95.561	101.429	111.342	101.842	98.8883	101.201	101.032	100.739	106.668	98.3929	96.7937	102.803	100.389	103.932	102.32	101.022	95.0471	101.456	95.5237	100.071	100.853
31	109.605	97.061	95.8498	104.835	101.753	94.1919	98.0146	102.867	94.0401	98.9981	97.513	101.21	99.7614	98.421	105.142	105.638	100.576	101.321	97.3037	102.2	104.361	105.073	96.1304	98.0623	100.817	102.607	95.8194	94.4534	95.4996	100.564	111.123	102.371	100.628	101.151	102.138	99.3158	107.837	98.3812	97.1338	102.87	100.38	103.752	102.717	100.777	94.5501	101.88	95.2078	99.2459	101.137
32	108.876	97.6299	95.636	104.511	101.592	95.0655	97.8119	102.915	94.3037	99.4687	97.2873	101.99	99.3317	99.22	105.604	105.766	100.399	101.444	96.4791	103.228	104.349	105.659	96.1999	98.5571	99.8208	102.901	95.969	95.3284	95.7326	101.486	110.607	102.49	102.465	101.595	101.805	99.9834	107.706	98.6418	96.95	102.881	100.035	103.709	102.462	100.873	94.5766	100.828	95.3064	100.175	102.227
33	109.68	98.376	94.8109	105.395	102.075	95.1124	97.4416	103.557	93.7077	99.2186	97.3174	102.298	99.8939	98.2738	105.313	105.379	99.5706	101.386	96.7166	103.323	105.017	105.738	96.6279	98.0172	99.7042	102.906	96.1864	95.8449	95.4146	101.477	110.389	101.619	103.475	101.556	102.247	100.35	106.604	97.811	97.1804	102.599	101.08	103.793	101.647	101.017	94.999	100.987	95.5209	100.063	102.109
34	109.372	98.4642	96.1105	104.63	101.735	94.7689	97.9619	103.34	93.338	99.4253	97.4959	102.668	100.012	98.6141	106.437	105.157	99.55	101.536	96.4741	103.6	104.893	105.138	96.7983	98.5826	100.016	103.189	95.5444	95.8233	95.9394	100.829	110.328	101.292	102.229	102.149	102.247	100.499	106.337	97.8158	96.6243	102.109	100.451	103.735	102.165	101.161	94.8809	100.584	95.097	100.247	101.044
35	110.153	98.0979	95.6212	105.242	101.533	95.035	97.963	104.384	93.7752	99.5472	97.3381	102.096	100.529	98.7283	106.632	105.859	99.6721	101.868	96.1063	103.667	104.669	104.631	96.7009	98.8049	100.361	103.408	96.33	95.8078	96.2103	101.433	110.923	101.561	103.94	101.78	102.15	100.425	105.906	97.7081	96.922	101.902	100.285	103.657	102.376	101.107	95.085	101.605	94.8357	99.7852	101.436
36	109.88	99.0699	95.2451	105.586	102.305	94.2776	97.4785	103.514	94.2199	100.118	98.2436	103.301	100.609	99.2535	107.252	105.496	100.349	102.027	96.6795	102.348	104.53	104.618	96.2075	98.9428	100.968	103.498	96.4081	95.5566	96.2048	101.879	111.491	101.225	103.77	101.852	102.692	101.222	107.273	98.6605	97.9612	101.844	100.29	103.71	102.666	101.174	94.9339	101.767	95.1551	100.294	102.002
37	109.42	99.44	97.1488	106.228	101.751	95.2316	96.681	104.624	94.3656	100.584	98.0959	103.2	100.795	98.9995	106.656	106.057	99.9484	102.003	97.2217	103.451	105.02	105.408	96.0829	99.2071	101.369	103.907	96.1535	95.794	96.1975	100.455	110.587	102.545	104.67	101.874	102.625	101.628	105.688	97.5241	97.366	102.995	99.796	104.111	102.393	100.917	94.9651	101.876	95.2187	101.18	102.14
38	110.652	99.2763	96.4147	105.849	101.713	94.4388	97.4667	105.402	94.5035	101.149	98.0047	103.247	100.189	99.6571	107.946	105.963	100.436	101.642	97.0909	103.378	104.974	105.627	96.1417	98.7482	102.289	102.645	96.2797	96.6594	95.9584	101.063	110.776	101.818	104.473	102.423	102.595	101.182	107.301	98.0595	97.4191	102.12	99.5876	103.524	103.464	101.178	95.0162	101.907	95.6263	101.843	101.455
39	111.236	99.7417	96.8088	107.142	102.159	94.6851	97.422	106.02	94.2067	100.81	98.167	103.167	100.96	99.8384	107.407	105.891	99.9368	101.901	96.3958	103.657	104.973	104.467	96.3778	98.9963	101.819	103.031	96.2081	96.8612	96.4923	102.071	111.557	102.485	104.606	102.737	102.895	100.781	105.513	98.3459	97.7743	102.495	99.9954	103.856	104.101	101.258	95.1257	102.123	95.7034	101.304	101.758
40	110.878	100.072	97.2998	106.874	102.334	95.1843	97.2335	105.464	94.2456	100.885	98.0763	103.247	100.967	99.3335	108.566	106.229	101.029	101.73	96.8949	103.514	105.546	105.052	96.4219	98.6948	102.208	103.702	95.8066	96.4105	96.822	101.261	110.772	101.506	105.551	102.561	102.154	101.009	106.94	98.0613	97.3509	102.722	99.198	103.846	103.381	100.709	95.4877	102.334	94.9842	100.959	101.03
41	111.368	100.919	97.1016	106.696	102.385	95.2994	96.8728	105.191	93.915	100.906	97.9585	103.45	101.186	99.9618	108.579	106.047	101.424	102.558	96.5078	104.073	105.355	104.187	96.5247	99.8486	102.514	103.818	95.9331	94.7051	97.2123	100.819	110.492	102.269	106.068	102.735	102.811	101.564	105.832	97.6268	97.8857	102.749	100.107	104.056	103.441	101.308	95.1552	103.417	94.9155	100.779	101.574
42	111.78	101.124	97.8679	107.301	102.201	95.6499	96.9205	105.108	94.6378	102.031	98.7012	103.565	101.092	99.9972	108.786	105.947	101.042	102.862	97.709	103.536	105.499	104.531	96.3191	100.107	102.907	103.323	95.4539	95.5244	97.0326	101.402	110.53	102.056	105.594	102.605	103.385	101.649	105.623	98.3407	97.845	102.939	100.107	103.943	102.891	101.467	95.2047	103.133	95.0202	101.592	101.941
43	110.668	102.004	97.9085	106.923	102.197	95.1874	97.3431	106.065	93.9959	102.116	98.4051	104.022	101.701	100.567	109.517	105.576	101.876	103.005	97.4577	103.557	105.63	104.798	96.6508	99.7122	102.363	103.399	95.9088	95.6466	97.671	102.525	111.289	101.42	105.925	102.768	103.29	101.349	105.729	97.1289	99.1502	102.831	99.5148	104.261	103.229	101.374	95.3005	103.547	95.3872	102.165	101.433
44	111.603	101.387	98.0934	107.546	102.831	95.1913	97.7304	106.26	94.678	101.292	98.6888	104.045	101.391	100.018	109.299	105.677	101.8	103.306	96.9353	104.147	105.986	104.376	96.9267	100.034	102.735	103.792	95.9495	95.075	97.8281	101.156	110.824	102.181	106.181	103.929	103.68	102.179	106.563	98.612	98.0041	103.185	99.8185	104.357	103.602	101.654	95.017	104.084	94.8888	102.268	101.834
45	111.584	101.871	97.7508	107.149	102.38	95.4024	97.8926	106.665	94.5083	101.482	98.9191	104.586	102.541	100.036	109.156	106.199	102.887	103.344	97.4647	104.003	105.892	104.476	97.0587	99.7279	102.742	104.443	96.1857	95.9287	98.9737	101.739	110.969	101.768	106.48	104.132	103.937	101.303	106.807	97.6486	97.7718	103.591	100.195	104.515	104.133	102.216	94.8538	104.058	94.9275	102.761	102.4
46	112.634	102.869	98.1217	107.053	102.282	96.1551	98.0594	107.744	94.7197	101.674	98.6736	103.659	102.263	100.785	108.67	106.68	102.634	103.281	97.2118	103.927	105.667	105.476	97.2867	100.121	102.619	104.402	96.3379	96.6928	98.6026	101	110.538	101.89	107.5	103.999	104.167	101.627	105.65	98.7005	98.6806	103.523	101.235	104.544	104.327	102.084	95.4804	104.44	95.2491	103.346	101.785
47	113.228	102.906	98.5285	107.555	102.052	95.8331	97.9629	109.766	94.0964	101.778	99.1292	104.001	102.411	101.084	109.166	106.533	103.728	103.215	97.0504	104.105	106.087	105.506	97.8591	99.9239	103.562	104.383	96.1567	98.9218	99.4715	100.999	110.918	102.406	107.886	104.501	104.298	102.822	106.353	98.8667	97.6184	104.352	100.586	104.235	104.227	101.99	95.7258	104.984	95.1673	102.178	101.154
48	113.56	102.963	98.0165	107.571	103.191	96.5611	97.7934	109.9	93.8653	101.521	98.7267	103.855	103.19	101.584	109.105	106.444	103.667	103.676	96.9352	104.903	106.067	105.122	97.5868	100.088	103.455	104.469	95.9815	98.1888	99.153	101.586	111.423	102.893	107.86	104.751	104.412	102.585	104.926	97.3672	98.6933	104.125	100.366	104.47	103.892	101.546	95.9229	105.507	95.1232	102.88	102.445
49	115.002	102.794	98.9952	107.755	103.205	96.5186	98.1952	110.584	93.2699	102.499	99.1783	104.646	103.444	101.102	109.02	106.865	105.117	103.996	96.6726	104.24	106.232	105.487	98.4661	99.9234	103.935	104.563	96.3988	99.0446	99.4449	101.735	110.764	103.354	107.49	104.086	104.352	102.343	106.14	98.4253	98.9889	104.303	100.834	104.867	104.51	101.205	96.9248	105.65	95.308	102.978	102.111
50	114.907	102.599	99.1367	108.177	103.351	96.3196	97.7672	111.461	93.5157	102.869	98.5471	104.221	103.824	101.332	109.523	107.277	106.611	104.237	97.0613	104.552	106.178	105.394	97.6689	100.476	103.753	106.188	96.7503	101.814	99.746	101.828	110.329	101.962	107.963	104.13	105.244	102.484	106.213	97.5472	99.4309	104.394	100.741	104.934	103.586	101.22	96.9856	105.113	95.665	103.106	101.719
51	114.77	102.786	99.2833	108.554	103.016	96.0069	97.907	112.335	93.5998	102.192	99.2331	103.989	103.566	101.395	109.528	107.263	106.247	104.556	97.1831	103.934	106.153	106.393	97.6129	100.062	104.287	106.265	96.5954	102.564	99.3822	103.168	110.001	103.042	107.054	103.908	104.557	102.505	105.574	98.3862	99.887	104.966	99.7261	104.655	105.058	101.983	97.7051	104.813	95.5636	102.883	102.656
52	115.438	103.017	99.4254	108.571	103.272	96.0103	97.526	112.253	93.6927	102.84	98.7535	104.506	103.52	101.923	109.564	106.692	107.314	104.323	97.6617	104.582	106.486	106.014	98.2341	100.304	104.974	106.338	96.3685	102.866	99.8575	102.967	110.566	103.311	105.726	104.56	104.53	102.978	106.882	97.9217	99.8594	104.99	100.719	104.743	104.663	102.34	97.7736	105.317	95.5939	103.628	101.3
53	114.655	102.423	99.1402	108.857	103.645	96.4779	97.9877	113.172	93.5523	103.843	100.329	104.353	103.905	103.002	109.502	107.762	107.163	105.084	97.9511	104.88	106.718	106.498	97.9537	100.978	104.975	106.569	96.9536	103.416	100.561	103.263	110.757	102.398	107.201	104.345	105.234	102.851	104.76	98.4225	99.6687	104.293	100.502	104.505	105.061	102.97	98.3614	105.009	95.3014	103.83	102.299
54	115.601	103.24	99.0989	108.96	104.108	96.2081	97.8822	114.275	94.3926	103.502	99.0465	104.151	104.511	102.416	110.219	107.553	107.758	104.733	98.0232	104.842	106.158	106.658	97.8007	101.454	104.825	106.809	97.0478	104.069	100.05	105.199	109.71	104.002	107.41	105.039	105.067	103.369	106.286	99.3643	99.5388	105.035	99.866	104.634	105.664	102.195	98.6794	105.593	95.431	103.344	101.553
55	114.642	103.032	99.735	109.535	104.015	96.972	97.8366	113.453	93.8539	103.71	99.691	104.955	104.836	103.197	109.873	107.478	108.02	104.119	98.9457	104.707	105.982	107.378	98.1054	100.85	105.293	106.627	96.3008	104.875	101.328	104.771	110.636	103.12	107.7	105.155	105.126	103.696	105.748	98.954	99.6388	105.227	99.8424	105.256	104.154	103.283	99.0413	106.29	95.8476	103.423	102.346
56	115.833	102.641	99.9182	109.431	104.775	97.6456	97.6673	113.769	94.0886	103.926	99.6439	104.873	104.593	103.478	110.424	107.84	108.227	104.172	98.5452	105.255	107.568	107.291	98.0881	100.71	105.21	106.463	96.6449	105.61	100.469	105.709	110.817	103.829	107.292	104.967	104.414	102.948	105.333	98.1526	100.361	105.653	99.8925	105.437	104.514	103.779	99.783	106.265	95.1789	102.882	101.765
57	116.707	103.375	100.929	108.729	104.63	98.12	98.5137	114.123	94.2605	103.574	100.066	105.094	105.226	103.635	110.056	108.028	109.151	103.93	99.0024	105.643	106.816	106.363	98.3411	100.852	105.906	106.374	97.0324	105.63	100.628	107.375	111.294	104.385	107.43	105.154	105.592	103.02	105.368	98.8399	99.6876	105.013	99.8658	105.479	105.555	104.189	100.149	106.593	95.6797	104.144	102.245
58	116.314	102.839	100.767	109.391	105.067	98.9958	98.2982	113.745	93.7283	104.184	99.5309	104.407	104.603	103.576	110.546	108.03	110.579	104.285	98.0958	105.847	107.308	106.475	98.3078	101.385	105.522	106.403	97.3371	105.883	102.001	107.837	109.872	104.113	106.45	105.884	105.11	102.849	106.549	97.7073	100.106	105.141	100.255	105.17	105.827	103.939	100.201	106.009	96.0631	104.472	102.209
59	116.347	102.917	100.546	109.19	104.914	99.0411	98.6354	113.778	93.5934	104.097	99.2462	104.423	104.676	104.866	110.568	107.91	110.619	104.643	98.5008	106.005	107.294	107.227	96.973	100.608	105.837	105.296	97.3205	105.627	101.626	107.505	110.798	102.985	107.111	105.765	105.668	103.681	105.108	98.5838	99.8671	104.425	99.1694	104.692	105.322	105.085	100.902	105.959	95.7807	103.938	101.453
60	116.493	103.41	100.397	109.161	105.114	99.5857	98.5549	114.203	93.7423	103.989	99.0838	104.453	105.174	105.144	110.387	107.952	110.887	104.642	98.8355	106	107.928	107.386	96.9193	100.169	106.218	106.672	98.2762	105.617	102.299	107.959	109.992	102.842	107.155	107.296	105.573	103.952	105.791	100.414	100.304	105.507	99.8059	105.455	106.071	104.592	100.963	106.161	95.391	104.874	102.778
[truncated: 70 more columns]

## Sheet: y27 all
position	1	1	1	1	1	1	1	1	1	1	1	1	1	1	1	1	1	1	1	2	2	2	2	2	2	2	3	3	3	3	3	3	3	3	3	3	3	3	3	4	4	4	4	4	4	4	4	4	4
cell	1	2	3	4	5	6	7	8	9	10	11	12	13	14	16	17	18	19	20	1	2	4	5	6	7	8	1	2	3	4	5	6	7	8	9	10	11	12	13	1	2	3	4	5	6	7	8	9	10
t (min)	1	1	1		1	1	1		1	1	1	1	1	1	1	1	1						1	1			1	1	1	1	1	1	1	1	1		1		1	1		1	1	1	1	1		1	1
0	100	100	100	100	100	100	100	100	100	100	100	100	100	100	100	100	100	100	100	100	100	100	100	100	100	100	100	100	100	100	100	100	100	100	100	100	100	100	100	100	100	100	100	100	100	100	100	100	100
1	98.4332	100.254	100.338	100.655	100.337	99.4448	99.7105	100.517	99.8748	101.376	100.399	99.782	100.769	100.646	99.5115	100.841	100.576	99.289	100.294	100.126	100.688	98.5291	99.7833	100.019	100.404	99.4898	100.146	100.279	100.582	101.123	98.0995	99.6206	100.406	100.841	100.513	101.087	100.218	99.5921	101.756	99.1874	101.814	99.9188	99.2273	100.711	101.266	101.804	100.706	99.8887	99.2931
2	96.6913	100.927	100.509	100.255	100.403	99.7022	99.2206	101.449	99.9282	102.336	100.96	99.3079	100.842	100.979	100.122	100.708	101.259	99.1015	100.394	98.6299	100.805	97.7266	100.653	99.924	100.441	99.2236	99.2277	101.019	100.196	101.583	96.274	100.077	100.764	101.026	101.229	102.222	100.286	100.357	102.352	99.5295	103.323	100.356	99.1386	102.125	101.789	103.16	101.525	100.642	98.5687
3	94.6634	101.114	101.329	100.15	100.074	99.9048	99.1052	102.068	99.4114	102.149	101.012	99.1626	100.539	101.234	99.7248	100.213	101.826	99.1733	100.214	99.6014	101.425	96.9448	100.899	100.487	100.53	99.2212	97.7219	101.246	100.214	101.821	95.4934	99.0391	100.558	101.172	100.773	101.981	99.7123	100.951	102.899	99.6203	103.774	100.538	99.7699	102.546	102.234	104.219	103.655	100.796	98.1544
4	93.3612	101.145	101.815	100.799	99.6292	99.0899	98.7523	102.225	99.656	102.876	101.677	98.8358	100.888	101.064	99.2508	100.89	102.583	98.1985	99.5451	98.9843	101.66	96.879	100.715	100.509	99.6656	99.1309	97.4702	101.495	99.2731	101.991	95.0516	98.7287	101.216	100.158	101.228	102.165	99.6191	100.908	103.821	98.5372	104.39	100.263	98.8759	102.74	103.473	105.72	103.404	102.443	97.9142
5	91.6244	101.377	101.997	101.017	100.103	98.8086	98.1227	102.908	98.4451	104.479	101.967	98.1847	101.216	102.919	99.4406	97.6282	103.384	98.4179	99.396	99.3032	101.577	97.5458	101.625	100.352	100.352	99.5079	97.0968	101.203	98.9145	103.045	94.8962	98.7198	102.649	101.251	101.268	105.097	101.346	101.819	105.138	99.2452	106.456	101.675	99.8562	104.728	103.847	107.725	104.992	103.216	98.5488
6	92.5168	103.112	103.911	101.843	101.464	100.19	100.199	105.101	99.2685	106.522	104.177	100.459	102.473	103.655	100.329	98.5216	105.773	99.2109	100.972	100.315	102.961	97.1577	101.922	101.232	100.683	99.8525	97.0805	100.873	99.3287	102.891	94.5411	99.7791	103.596	100.386	101.116	106.554	102.39	101.328	106.154	98.8548	107.576	101.339	101.373	106.047	106.862	109.756	106.437	104.005	98.497
7	92.8109	104.047	104.764	101.516	102.121	100.704	100.985	104.956	98.9594	108.234	104.812	102.446	102.258	102.396	100.6	97.8365	107.736	98.986	101.609	101.078	103.399	97.3678	101.707	102.516	99.9082	100.489	95.4826	100.23	99.6771	103.413	94.5881	100.341	104.128	100.488	101.722	107.038	102.545	101.574	107.147	98.2016	107.786	102.044	102.446	107	107.844	112.495	106.433	105.116	98.3758
8	93.6562	105.616	105.21	102.281	102.567	100.424	101.296	105.333	99.5795	109.001	104.686	103.216	102.141	101.416	100.738	97.6249	109.45	99.4791	101.441	100.594	103.71	95.968	100.125	103.253	98.5183	99.6839	95.3334	99.6602	100.191	103.988	94.0544	100.893	105.286	100.155	101.75	107.221	102.761	101.356	107.844	97.2154	107.064	101.486	102.21	107.232	109.142	114.053	107.429	105.917	97.8825
9	93.85	105.952	105.686	101.78	102.767	100.142	101.424	105.425	98.4692	109.961	104.262	103.831	102.388	100.149	100.239	96.805	110.34	99.6897	102.514	99.5223	103.495	96.3921	99.8348	104.114	98.2899	98.7946	95.5709	98.7513	100.663	103.464	94.1212	101.951	104.969	100.403	101.643	107.092	103.532	100.26	109.004	95.9861	106.72	101.275	103.409	107.342	109.802	115.433	106.484	106.462	97.1474
10	93.9174	105.35	107.688	101.706	102.69	99.7605	100.827	105.809	98.4956	110.27	102.593	103.769	102.268	98.7036	99.9341	97.1432	111.892	99.8261	102.789	99.7192	103.435	96.2254	98.3093	105.179	98.0365	98.5202	95.6284	97.4669	101.842	103.261	93.9273	102.521	105.514	100.328	101.712	105.154	104.015	100.58	109.181	95.03	105.207	101.679	103.185	107.282	111.335	115.713	107.936	106.97	96.5027
11	94.6905	105.313	108.948	101.304	102.306	100.2	100.744	106.663	98.316	109.876	102.385	104.109	102.084	97.7712	99.1336	96.767	112.817	100.391	102.967	99.1545	103.065	96.0688	97.0064	105.775	96.6666	99.146	95.9473	96.1364	102.238	103.724	93.5631	103.49	104.998	99.7269	101.727	103.399	103.539	100.456	109.903	94.3201	105.371	101.91	102.64	107.174	113.403	116.294	106.559	107.575	96.4691
12	95.4484	105.945	110.124	101.406	102.238	100.498	101.02	106.5	97.3887	110.194	100.273	104	102.477	96.0147	99.0643	96.2959	113.349	100.957	103.208	98.74	102.879	95.9883	96.3236	106.179	96.3347	97.6384	95.8949	95.5452	102.752	104.524	93.6003	103.861	104.392	99.4578	102.477	102.184	103.701	100.553	110.334	93.0601	105.055	101.459	102.04	107.167	113.75	116.588	107.78	107.834	95.804
13	96.5002	105.669	109.844	100.584	102.302	100.536	100.246	107.617	97.9155	109.983	99.6495	104.315	102.886	94.9317	98.6349	96.1845	113.711	101.387	103.673	98.6176	102.792	94.2179	95.1319	106.171	95.2753	97.9367	95.5889	94.1997	103.407	105.236	92.8358	104.379	103.552	99.0343	103.316	100.723	103.766	101.1	109.632	92.131	105.184	100.538	101.471	106.807	114.313	115.968	107.544	107.312	95.7295
14	95.2329	105.458	110.011	101.111	101.115	99.7679	100.565	107.142	97.1858	109.367	98.9772	103.823	102.055	93.8121	98.48	95.623	113.991	100.744	103.48	99.028	103.635	94.2863	95.2009	105.704	95.4013	96.9476	95.7994	93.0607	103.76	105.663	92.8798	104.053	103.552	98.6754	102.987	98.7239	103.207	100.998	109.769	91.3927	104.552	99.8319	100.466	106.872	114.96	115.966	107.36	106.517	94.6636
15	94.7978	105.091	110.113	100.33	100.489	100.204	101.019	107.355	96.3878	108.494	96.0169	103.886	102.012	93.6698	97.5064	94.8855	113.801	102.08	103.026	98.4361	103.19	94.3394	94.5734	105.553	95.192	97.4533	95.873	92.2673	104.082	105.806	92.7914	104.71	102.277	99.2073	103.738	99.4692	103.654	101.492	109.646	90.4008	103.611	100.375	100.328	107.902	115.546	115.589	106.589	106.617	94.5378
16	94.0813	104.465	109.457	100.381	100.032	99.7404	100.642	107.168	97.0623	107.814	94.3383	103.943	102.091	93.1148	97.4516	94.7793	114.188	101.66	103.601	98.5534	104.199	94.3754	95.1942	105.094	94.7531	97.0549	95.1311	91.8584	103.937	105.686	93.2106	104.456	101.434	98.5932	103.756	99.2158	103.632	101.697	109.471	88.8294	104.092	100.118	98.6867	107.266	114.845	114.756	105.608	106.353	94.2325
17	93.5061	104.446	108.805	99.5766	99.9054	100.452	100.271	107.112	96.3889	107.014	92.8715	103.749	102.19	91.755	95.7722	94.1536	114.098	101.533	103.424	98.2029	103.574	93.3755	93.9616	104.732	94.4882	97.2914	95.0533	91.1434	103.961	105.745	92.6227	104.287	100.971	98.2098	104.092	98.4995	104.203	101.447	109.342	88.1785	104.327	100.219	97.2364	107.084	115.156	114.53	105.303	105.379	93.3644
18	93.649	103.966	108.228	99.4686	99.2161	100.41	100.316	106.818	96.1413	106.102	91.3392	103.407	101.764	91.0289	96.393	93.971	114.322	102.625	103.698	97.6078	104.359	93.5975	93.7311	104.442	93.7713	96.2378	94.826	90.887	104.107	105.881	92.8784	105.1	100.172	97.8308	104.198	98.8198	103.828	101.936	109.427	87.9894	104.466	99.8451	96.6913	107.06	114.858	114.107	105.134	104.973	93.8865
19	93.6292	103.441	107.924	99.5225	98.3912	99.944	100.587	107.123	95.7936	105.819	91.6229	103.104	101.614	90.5417	96.0345	93.9097	114.309	102.191	103.354	98.2781	104.078	93.1172	94.1785	104.105	93.9406	96.9307	94.393	90.2468	104.377	105.298	92.5014	104.557	99.2926	98.155	104.363	98.5787	103.95	102.59	109.633	87.2232	103.893	99.372	96.4431	107.259	115.088	113.767	104.781	104.686	93.5527
20	94.1519	102.747	107.638	99.5309	98.1274	99.9993	100.152	107.833	95.8515	104.68	90.7253	102.461	101.509	89.1956	96.0735	93.9328	114.072	102.839	103.413	97.9486	103.881	92.4587	94.6766	103.886	93.2586	96.9909	95.1593	89.6294	104.241	105.409	92.7088	104.704	98.3097	97.1236	105.308	98.2487	103.526	102.801	109.31	85.7662	103.982	99.9438	96.0372	107.76	115.557	113.949	104.949	103.772	92.4622
21	95.3626	101.954	106.818	99.2446	96.9881	99.0509	99.6434	107.734	95.1379	104.092	89.8323	102.422	101.734	88.4337	96.0804	93.5819	114.781	103.326	103.751	98.2663	103.743	92.4293	94.0515	103.92	93.1349	96.9343	94.8797	89.1448	104.181	104.723	92.4837	104.853	97.1738	96.2773	105.114	98.286	104.083	103.307	108.998	85.7407	103.877	100.032	95.1867	107.939	115.38	113.044	104.287	103.596	93.1381
22	95.0605	101.438	107.311	99.06	96.9996	99.2893	99.1521	108.171	95.1832	103.515	88.3511	101.64	101.384	88.0753	96.1427	93.3573	114.72	102.906	103.41	96.9004	103.792	92.3217	94.0741	103.994	92.9725	96.2011	95.0358	88.8961	104.171	105.165	91.8666	105.412	96.6712	95.7384	105.244	98.2696	103.942	103.619	109.244	86.5591	103.87	99.1141	94.4697	108.007	115.156	113.221	105.053	102.653	92.1709
23	96.2313	99.8074	106.333	98.9638	96.2382	99.2367	99.0012	108.03	95.5388	102.961	87.4871	101.617	101.653	88.089	95.7412	93.098	114.477	103.542	103.644	98.1227	103.72	93.018	93.2871	103.305	93.3726	96.8426	95.2084	88.8738	104.041	104.922	91.6489	104.88	95.776	95.3731	105.195	97.7177	103.7	104.634	108.876	85.6446	102.867	99.1876	94.0239	107.851	114.996	113.197	105.055	103.228	92.4243
24	97.9358	99.6864	106.452	98.3197	95.5174	99.1209	98.888	108.051	95.2849	102.008	87.4371	101.318	101.001	87.3569	94.9954	92.3524	114.336	103.824	103.571	98.1744	104.291	92.5247	93.2536	103.288	93.0782	96.8674	94.4628	88.7176	104.094	104.852	92.5114	105.465	94.9639	94.7663	105.22	98.2388	104.053	105.422	108.782	85.7971	104.247	99.4259	93.1364	107.529	114.976	113.001	104.484	102.879	92.6733
25	99.2276	98.8119	106.056	98.583	94.9348	99.2452	98.0552	108.723	96.0788	102.072	87.5741	100.883	100.363	87.0512	94.583	92.6648	114.116	104.195	103.265	97.8498	104.375	93.2768	92.9964	102.622	92.2628	96.1302	94.1632	88.8695	104.369	104.092	92.0221	105.071	93.9063	94.7089	105.604	98.4884	104.02	105.894	109.073	85.1422	104.166	99.1103	92.0199	107.956	115.587	112.262	104.133	102.439	92.2989
26	100.11	98.2331	106.493	98.1575	94.8065	98.6476	97.7622	109.024	95.9215	101.807	88.4923	100.686	100.272	86.4409	94.1399	92.2997	113.756	104.045	103.55	98.3541	104.456	92.8668	93.4255	102.342	92.624	95.7238	94.6349	88.9766	103.775	104.715	91.8497	104.923	93.5806	93.824	105.782	98.0657	104.108	106.491	108.807	85.8953	104.256	98.6183	92.9362	108.618	115.701	112.698	104.764	102.592	91.9432
27	101.245	97.1663	106.089	97.7508	93.2657	98.3802	97.2145	108.46	95.4393	101.085	87.5893	99.8524	100.262	86.0919	94.1061	92.5353	113.774	104.257	103.293	98.7883	104.308	92.7584	92.7663	102.015	92.5133	95.6844	93.6682	88.5409	103.822	103.983	91.7852	105.411	93.5297	94.0043	105.535	98.5369	104.227	107.035	108.633	85.1003	103.797	98.5292	92.3878	108.329	115.765	112.162	104.137	102.139	91.7191
28	102.409	97.4614	106.882	97.9955	93.1312	98.1241	96.9619	108.746	95.9196	99.8402	87.2808	100.163	99.6494	86.1351	93.5526	92.2256	113.992	104.29	103.378	98.3955	104.37	92.6272	92.6253	101.391	92.323	95.4429	93.7257	88.1875	104.324	103.852	91.4496	105.118	92.0175	92.7528	105.716	98.3022	103.821	106.724	109.637	84.4885	103.545	98.5688	91.989	108.612	115.075	111.991	104.576	103.014	91.1246
29	102.849	96.8153	106.988	98.0544	93.395	98.0276	96.9705	108.576	95.193	99.9077	87.7295	99.6964	99.7011	85.9215	93.9506	92.038	114.278	104.157	103.594	98.1907	105.083	92.0066	93.2147	100.986	91.6843	95.6396	93.3162	88.3065	104.042	103.989	91.2705	105.392	91.1214	92.9026	105.842	98.7793	103.698	107.994	108.878	85.0011	103.276	97.7782	92.1242	108.874	115.403	112.089	104.009	103.086	91.1546
30	104.673	96.974	106.731	97.5692	92.6688	97.7261	96.2081	108.592	95.3516	99.6021	86.7106	99.4746	99.4886	85.6136	93.4624	91.2023	113.801	104.009	103.358	97.717	104.65	92.6156	93.192	100.814	91.5953	95.702	94.3373	88.4568	103.911	103.416	91.7911	105.322	90.462	92.4728	105.345	98.5196	103.681	107.65	110.054	85.818	103.862	98.0139	92.4472	108.189	115.347	110.743	103.857	103.406	90.3888
31	105.006	96.3814	107.042	97.4121	91.6118	97.7114	96.5433	109.137	94.0581	99.0229	85.8082	99.1001	99.7667	84.7939	93.3758	91.7152	114.256	103.912	102.971	98.1042	104.605	92.0504	92.8578	100.653	91.5773	95.9534	93.7895	88.2855	104.552	102.983	91.1809	105.245	89.0523	92.6813	105.102	98.4814	102.684	108.069	109.796	85.8044	102.671	98.0771	91.9213	108.319	116.71	110.176	103.517	103.437	90.7655
32	105.732	95.7956	107.734	97.4301	91.3502	96.6473	95.6595	108.996	93.4191	98.1183	85.2877	99.0029	99.5611	84.3916	93.0976	90.9792	113.455	104.539	102.592	98.5925	105.292	91.8697	91.9872	100.197	91.2835	95.5094	93.798	88.2394	104.509	103.6	91.6466	104.802	88.3607	91.9394	105.882	99.2933	103.621	108.767	110.1	85.9594	103.412	98	92.0701	107.535	116.057	110.064	103.452	102.554	89.7737
33	106.086	94.9139	107.428	97.2753	91.2254	96.7877	95.4263	109.703	93.037	97.5741	85.0673	98.9258	99.1604	83.5707	92.9855	91.2204	113.796	104.044	103.611	98.1142	105.549	92.1071	91.8811	99.1127	90.8778	95.7368	93.7816	88.7157	104.549	103.807	91.3814	104.661	88.0596	91.5283	105.502	99.2731	103.528	109.11	109.649	85.7237	103.27	98.0434	91.8078	106.537	115.864	109.942	102.652	103.68	89.9409
34	106.715	94.7813	107.05	97.4612	90.6143	96.4646	94.48	109.97	91.9817	97.1535	84.5846	98.2755	99.6677	82.9713	92.8898	90.2726	113.923	104.604	103.188	97.6948	105.436	91.8183	92.2098	99.5282	90.8386	95.9204	93.3772	88.3346	104.521	103.121	91.4853	105.148	87.1965	91.3068	104.996	99.3091	102.9	109.554	110.379	86.4163	102.45	97.664	91.919	106.466	116.182	109.702	103.911	103.704	89.601
35	107.103	94.3478	106.989	96.8563	90.5236	96.4435	94.3778	109.395	91.892	97.4406	84.0949	97.7015	99.5349	82.1149	92.356	90.1188	113.542	103.912	103.213	97.6557	105.31	92.1458	91.7703	98.5619	91.0086	94.9258	92.9318	88.5135	104.362	102.952	91.6431	104.772	87.5288	91.4108	105.559	99.1428	103.179	110.919	110.702	86.3204	103.064	96.841	91.7171	107.091	115.346	108.684	102.551	104.077	89.1717
36	107.451	94.5354	107.458	96.7927	90.4964	95.7888	94.3893	109.927	91.4348	96.9463	84.0877	97.4949	99.8526	82.3658	93.2937	90.2082	113.536	104.874	103.119	98.1075	105.778	91.5678	91.7646	98.5519	90.8646	95.7203	92.996	88.9565	105.118	102.877	91.1925	104.651	86.1305	90.5356	105.827	98.8815	103.733	110.528	110.044	86.8193	103.247	97.33	91.6855	106.592	115.748	109.078	102.762	103.723	89.3726
37	107.484	94.8773	106.774	97.3054	89.7734	95.6287	93.9681	110.386	91.4308	96.6152	83.5038	96.8493	99.738	82.1505	93.0856	89.3012	113.68	104.644	103.315	97.99	105.541	91.9489	91.3684	98.1531	90.8835	95.7289	92.4149	88.5479	105.062	103.026	91.3807	105.047	85.9424	91.1141	105.79	99.5262	102.706	111.015	110.789	86.7699	102.896	97.0144	91.5998	107.144	116.018	109.037	102.899	104.01	88.884
38	107.724	94.3517	106.961	96.8825	89.8388	95.1218	93.27	110.233	91.8215	95.6322	82.273	96.7065	99.3906	81.5266	93.2997	89.1516	114.05	104.83	103.606	98.1934	105.621	91.4806	90.2928	97.508	90.8368	96.4782	92.2347	89.081	105.102	102.721	91.4577	104.563	86.5207	90.3018	105.668	99.7524	103.324	111.552	110.015	86.7024	102.889	97.5526	92.2668	106.142	116.268	108.78	103.28	104.096	89.1836
39	107.43	94.127	107.055	96.8294	88.9797	94.6383	92.5038	110.739	92.0305	95.784	81.4795	96.5912	99.443	81.7523	93.081	88.9647	113.443	104.633	103.273	98.3541	105.639	91.6953	91.071	97.1224	90.4377	95.8844	91.8847	88.2308	105.551	102.311	91.1532	104.834	86.7401	90.4966	105.916	99.4303	103.344	111.086	110.526	87.0053	103.448	96.6177	92.3224	105.619	115.933	108.025	103.226	103.622	88.7395
40	107.291	93.4365	107.347	96.9881	88.94	94.7054	92.6463	111.408	91.9642	95.3636	80.6803	96.7573	99.0168	81.3059	93.0588	88.4352	112.865	104.297	102.797	97.5723	105.702	91.1401	89.5519	96.7878	90.5725	96.5529	91.671	88.4996	105.604	102.446	91.7057	104.078	87.034	90.8148	105.489	100.293	103.563	111.938	111.128	86.2443	101.949	96.5375	91.9789	105.608	116.164	107.535	102.888	103.514	88.2732
41	107.77	93.2502	106.498	97.4309	88.7697	94.2723	92.2626	111.055	92.2758	94.8617	80.8334	95.6535	99.2676	81.6586	92.7379	88.548	112.947	105.196	103.68	98.1404	106.057	91.5345	91.0794	96.963	90.4313	96.2624	91.2958	88.3888	105.791	103.035	92.0317	104.243	86.2137	90.6679	105.726	100	102.356	112.045	111.387	87.4167	102.494	96.5377	92.3738	106.003	115.396	106.769	101.911	103.908	87.9131
42	107.891	92.6853	106.622	97.0635	88.3839	93.4192	92.0696	111.171	92.1291	94.7559	80.8489	95.9406	99.3278	81.44	93.7583	88.3051	112.72	103.97	103.484	98.517	106.572	91.6014	90.6022	96.5664	89.7551	96.9751	91.1001	88.5096	106.21	102.56	91.4515	104.686	86.1618	90.8349	106.581	100.328	103.623	112.088	111.772	87.3515	102.154	96.5984	92.4943	105.283	115.333	107.149	102.788	104.243	88.0483
43	108.146	92.3768	106.647	97.2507	88.0493	93.3728	91.3777	111.532	92.1495	94.7148	80.5903	95.7576	98.8693	81.0853	93.4323	88.1629	113.148	104.232	104.082	98.4414	106.758	91.1932	91.0064	96.7759	90.3859	97.38	91.2239	88.705	106.29	102.842	91.793	104.625	85.2366	90.8622	105.685	99.9177	102.748	112.825	111.614	87.6079	102.345	96.2802	92.9973	104.228	115.25	106.369	102.902	104.779	87.3821
44	108.126	92.5651	105.691	97.2956	87.4262	93.0255	92.0523	111.275	92.6616	95.0415	81.8637	95.5893	98.6034	81.0377	93.5101	89.2274	113.173	104.188	103.993	98.7545	106.515	91.5038	90.7265	96.7056	90.1099	96.9442	90.4124	88.2025	106.433	102.606	92.0975	104.69	85.2603	91.3716	106.077	100.612	103.468	112.758	111.592	87.256	103.031	96.4223	92.3497	105.825	115.769	106.925	103.455	104.713	87.1427
45	107.231	92.3056	105.824	97.4229	86.0424	92.7937	91.1394	111.422	92.47	94.9481	80.9656	95.6122	99.1064	80.116	93.1927	88.442	113.226	104.067	104.312	98.6418	106.171	91.1953	92.1469	96.3906	90.2755	96.8647	90.3681	88.1766	107.203	103.823	92.0232	104.425	84.3345	91.0871	106.524	100.956	103.84	113.097	111.785	87.9985	103.457	95.6724	92.582	104.686	115.631	106.144	103.515	104.482	86.4983
46	108.876	91.275	105.093	97.3417	86.269	93.0736	90.843	112.051	92.6785	94.8698	81.4438	95.3447	99.309	80.8092	93.6726	88.7336	113.206	103.992	104.713	98.8871	106.751	91.8015	91.676	95.914	89.4968	97.0521	90.1813	88.3749	106.854	104.094	92.2556	104.113	84.2104	90.6356	106.816	100.378	103.564	112.73	111.625	88.6899	103.108	95.8045	92.1983	104.513	115.798	105.868	103.817	104.233	86.9533
47	107.318	91.6289	104.667	97.752	84.826	91.4636	91.1679	111.732	92.4916	95.2545	81.7467	94.9427	98.5265	80.0469	92.8316	88.9452	113.311	103.212	104.605	98.9412	106.608	92.017	91.323	95.8672	90.0854	97.2451	89.9536	88.4913	107.752	105.197	92.13	103.707	83.3431	91.1077	106.618	100.119	102.734	113.343	112.128	88.0152	103.652	95.1119	92.3362	105.102	115.731	106.028	103.773	105.277	86.4942
48	108.108	90.5051	104.463	97.8039	84.6478	91.8492	91.2844	111.703	93.5468	96.093	81.4212	95.2084	99.2456	80.7912	92.7595	88.7745	113.267	103.638	104.82	99.2821	107.187	91.5832	91.9386	95.7296	90.7363	98.1184	90.0977	88.1667	107.835	106.12	91.9993	104.136	82.0261	90.7183	107.264	100.753	102.734	113.385	111.662	89.0309	104.738	95.4041	92.4481	104.366	115.099	105.408	103.624	106.155	85.7813
49	107.752	90.1336	103.919	97.8009	84.4786	91.5788	90.7993	112.64	93.2331	95.7115	80.9469	95.1013	99.3224	79.7741	93.1139	88.552	113.412	104.067	104.325	99.5553	107.497	91.9188	92.8119	95.5161	89.9463	97.8812	89.6936	88.3655	107.957	106.39	92.1745	104.598	82.3165	91.196	106.648	101.254	103.374	113.715	111.881	89.1657	105.601	94.4526	91.8439	104.747	114.484	104.814	103.692	105.749	85.765
50	107.006	89.4419	103.191	98.0566	84.4923	91.1134	90.9769	112.483	93.5921	96.0814	80.2889	95.4746	99.3268	78.9479	92.7737	88.3476	113.457	103.857	104.705	99.4412	108.411	92.3446	92.1996	95.5032	90.5473	97.6572	89.5939	88.1965	108.428	106.962	92.2956	104.438	86.1753	91.9319	107.008	100.352	103.59	114.012	111.569	88.473	104.943	94.9442	92.4307	104.474	115.318	104.8	104.024	105.168	85.6259
51	106.914	89.9542	102.554	97.426	83.8223	91.3699	90.3958	112.412	94.5878	96.386	79.5537	95.0186	99.5471	79.2175	92.5822	88.6658	113.475	103.755	104.634	99.6795	108.427	92.4652	92.8593	95.3827	90.3978	98.1115	89.7933	88.0926	108.941	107.733	92.3757	103.963	85.6528	91.7592	107.404	100.693	102.521	113.635	111.939	89.6247	106.002	94.2765	93.265	104.283	114.816	104.244	103.467	105.412	85.6313
52	106.815	89.6898	102.285	98.1428	84.2269	91.0164	90.2613	112.661	94.4925	96.5953	79.1752	94.8194	99.2216	78.3109	93.0785	88.7037	114.159	104.406	104.3	99.7615	108.839	92.1355	92.9329	95.0647	90.6176	98.8708	89.7233	88.2345	109.058	108.587	92.5465	104.194	87.4691	91.8078	107.438	101.188	102.635	114.713	111.884	90.1402	106.833	94.0787	92.9889	104.21	114.84	104.571	104.001	106.706	84.9343
53	106.312	89.4927	101.888	97.5835	84.6281	91.0445	90.3461	113.12	94.7224	96.2302	79.3732	94.4419	99.5041	78.2692	93.3177	88.2299	113.511	104.582	104.771	99.9714	109.607	92.4015	92.2786	95.4383	90.5304	99.6559	90.5363	88.2853	108.77	109.103	92.6111	104.294	88.4463	92.0714	106.72	100.409	102.71	114.918	111.694	90.4129	107.042	94.4224	92.9346	104.046	115.183	104.06	104.019	105.857	85.2026
54	107.034	89.5246	101.994	98.0698	84.0849	90.9136	90.2957	113.45	94.7609	95.9673	78.5388	94.6279	99.4363	78.7545	92.722	88.6591	114.524	104.041	104.148	99.9089	110.201	92.5434	91.8324	94.671	90.847	99.2484	90.5053	89.0095	108.408	109.847	92.2881	104.134	88.7487	92.0536	107.102	101.198	103.588	114.633	111.269	90.9792	106.453	94.2396	93.0321	104.165	114.177	102.894	103.801	106.214	84.4444
55	107.04	89.4951	101.174	97.9239	83.8139	90.2246	89.6968	113.099	93.9715	95.9171	78.197	93.8208	99.1058	77.6425	93.1304	89.0674	114.274	104.471	104.659	99.9283	110.567	92.9786	91.2715	94.4235	91.1171	100.095	90.0646	88.7235	108.489	111.662	92.5934	104.662	89.0998	92.1581	108.108	100.458	103.403	114.836	112.104	91.5432	108.603	93.8695	93.5953	104.471	114.844	103.765	103.008	105.729	84.696
56	108.86	88.7211	101.535	98.1801	84.9976	90.0294	90.2038	113.689	93.9762	95.3914	79.5403	93.8518	99.3442	78.8806	92.9312	88.9472	114.506	104.638	104.148	99.8885	111.109	93.1358	92.4565	94.4192	90.8842	100.087	90.467	89.1725	108.928	111.437	92.482	104.228	88.9898	92.3185	108.038	100.744	103.26	114.741	112.518	91.725	109.676	94.4373	93.0617	104.134	114.091	103.439	103.838	105.384	84.3613
57	107.67	87.8873	100.991	98.906	85.5567	89.7231	90.5668	113.525	94.3885	95.6638	78.5627	93.9949	99.5217	78.3347	92.7308	88.569	113.763	104.902	103.853	100.292	111.457	93.2303	92.272	94.2303	91.6839	101.107	90.3283	88.9576	108.013	112.387	92.8908	103.617	85.1036	93.2066	107.794	101.574	103.648	114.96	112.024	92.6399	108.723	94.2279	93.4833	104.21	113.119	103.961	103.33	106.633	84.5673
58	109.029	87.8576	101.025	99.3623	84.4619	89.3283	89.533	114.089	94.3742	95.5149	78.3958	94.2615	99.5325	78.8427	92.4261	88.631	114.261	105.16	104.152	100.739	112.367	92.8699	91.8511	94.7453	91.2692	101.592	91.6094	88.5163	107.918	113.863	91.9105	103.989	80.2858	92.47	107.859	101.676	103.135	115.382	111.86	92.5432	109.919	94.102	93.1888	103.629	113.694	103.396	102.561	106.237	83.8454
59	109.589	86.5278	100.261	99.0872	84.6359	89.4311	89.642	114.884	93.8312	96.1838	78.2012	94.3024	100.966	78.8257	93.0021	88.2521	114.022	105.377	103.196	100.349	112.83	93.6741	91.9769	95.032	91.8981	101.94	91.7541	88.3637	107.234	113.853	91.8798	104.106	86.771	92.4247	107.762	101.779	103.973	115.515	111.801	92.0707	110.25	94.2868	93.4419	101.999	114.051	103.205	103.89	106.641	84.6309
60	109.303	87.2754	100.61	99.215	84.862	89.2698	89.6947	114.667	95.1445	95.6804	77.9825	93.6626	101.85	78.1645	93.13	88.3936	113.409	105.685	103.607	100.76	112.945	92.9079	92.359	93.8248	91.8149	101.522	91.6349	87.9365	107.214	115.193	92.313	103.041	79.6503	92.9353	107.923	101.126	104.016	115.9	111.976	93.4264	110.025	94.042	93.2447	102.968	113.478	103.362	103.85	106.794	84.2928
[truncated: 329 more columns]

## Sheet: y27 spread
position	1	1	1	1	1	1	1	1	1	1	1	1	1	1	1	2	2	3	3	3	3	3	3	3	3	3	3	3	4	4	4	4	4	4	4	4	4	4	4	4	4	4	5	5	5	5	5	5	5
cell	1	2	3	5	6	7	9	10	11	12	13	14	16	17	18	5	6	1	2	3	4	5	6	7	8	9	11	13	1	3	4	5	6	7	9	10	12	13	14	15	16	18	1	2	3	4	5	6	7
t (min)	1	1	1	1	1	1	1	1	1	1	1	1	1	1	1	1	1	1	1	1	1	1	1	1	1	1	1	1	1	1	1	1	1	1	1	1	1	1	1	1	1	1	1	1	1	1	1	1	1
0	100	100	100	100	100	100	100	100	100	100	100	100	100	100	100	100	100	100	100	100	100	100	100	100	100	100	100	100	100	100	100	100	100	100	100	100	100	100	100	100	100	100	100	100	100	100	100	100	100
1	98.4332	100.254	100.338	100.337	99.4448	99.7105	99.8748	101.376	100.399	99.782	100.769	100.646	99.5115	100.841	100.576	99.7833	100.019	100.146	100.279	100.582	101.123	98.0995	99.6206	100.406	100.841	100.513	100.218	101.756	99.1874	99.9188	99.2273	100.711	101.266	101.804	99.8887	99.2931	99.4961	98.6625	100.389	99.5116	101.173	100.764	100.174	100.602	100.804	99.3388	100.173	101.227	100.926
2	96.6913	100.927	100.509	100.403	99.7022	99.2206	99.9282	102.336	100.96	99.3079	100.842	100.979	100.122	100.708	101.259	100.653	99.924	99.2277	101.019	100.196	101.583	96.274	100.077	100.764	101.026	101.229	100.286	102.352	99.5295	100.356	99.1386	102.125	101.789	103.16	100.642	98.5687	99.4603	97.8549	100.055	100.04	101.959	101.123	99.5233	100.951	101.15	98.3472	99.3428	101.269	101.137
3	94.6634	101.114	101.329	100.074	99.9048	99.1052	99.4114	102.149	101.012	99.1626	100.539	101.234	99.7248	100.213	101.826	100.899	100.487	97.7219	101.246	100.214	101.821	95.4934	99.0391	100.558	101.172	100.773	99.7123	102.899	99.6203	100.538	99.7699	102.546	102.234	104.219	100.796	98.1544	98.7451	97.3214	100.006	99.7695	104.075	101.721	100.241	102.367	101.299	97.5908	99.7505	101.227	100.42
4	93.3612	101.145	101.815	99.6292	99.0899	98.7523	99.656	102.876	101.677	98.8358	100.888	101.064	99.2508	100.89	102.583	100.715	100.509	97.4702	101.495	99.2731	101.991	95.0516	98.7287	101.216	100.158	101.228	99.6191	103.821	98.5372	100.263	98.8759	102.74	103.473	105.72	102.443	97.9142	98.6439	97.412	99.9536	99.8431	104.909	102.285	99.4135	103.252	101.141	96.9948	98.8149	101.425	101.32
5	91.6244	101.377	101.997	100.103	98.8086	98.1227	98.4451	104.479	101.967	98.1847	101.216	102.919	99.4406	97.6282	103.384	101.625	100.352	97.0968	101.203	98.9145	103.045	94.8962	98.7198	102.649	101.251	101.268	101.346	105.138	99.2452	101.675	99.8562	104.728	103.847	107.725	103.216	98.5488	98.5741	98.5253	101.128	100.428	107.217	103.097	99.9286	104.231	103.019	96.5971	98.9545	100.595	101.869
6	92.5168	103.112	103.911	101.464	100.19	100.199	99.2685	106.522	104.177	100.459	102.473	103.655	100.329	98.5216	105.773	101.922	101.232	97.0805	100.873	99.3287	102.891	94.5411	99.7791	103.596	100.386	101.116	102.39	106.154	98.8548	101.339	101.373	106.047	106.862	109.756	104.005	98.497	99.2363	99.0156	101.86	100.371	109.779	103.924	101.301	106.546	103.342	97.6677	99.3348	101.202	102.685
7	92.8109	104.047	104.764	102.121	100.704	100.985	98.9594	108.234	104.812	102.446	102.258	102.396	100.6	97.8365	107.736	101.707	102.516	95.4826	100.23	99.6771	103.413	94.5881	100.341	104.128	100.488	101.722	102.545	107.147	98.2016	102.044	102.446	107	107.844	112.495	105.116	98.3758	99.985	99.2201	102.995	100.68	110.667	104.946	101.869	106.733	102.684	97.1296	98.8892	101.833	103.647
8	93.6562	105.616	105.21	102.567	100.424	101.296	99.5795	109.001	104.686	103.216	102.141	101.416	100.738	97.6249	109.45	100.125	103.253	95.3334	99.6602	100.191	103.988	94.0544	100.893	105.286	100.155	101.75	102.761	107.844	97.2154	101.486	102.21	107.232	109.142	114.053	105.917	97.8825	100.629	99.6379	103.685	101.025	112.874	105.183	101.624	108.416	103.229	97.8861	98.2661	102.886	104.427
9	93.85	105.952	105.686	102.767	100.142	101.424	98.4692	109.961	104.262	103.831	102.388	100.149	100.239	96.805	110.34	99.8348	104.114	95.5709	98.7513	100.663	103.464	94.1212	101.951	104.969	100.403	101.643	103.532	109.004	95.9861	101.275	103.409	107.342	109.802	115.433	106.462	97.1474	100.427	99.8937	104.471	100.781	113.998	105.911	103.132	110.133	103.857	97.5919	97.9934	102.709	106.683
10	93.9174	105.35	107.688	102.69	99.7605	100.827	98.4956	110.27	102.593	103.769	102.268	98.7036	99.9341	97.1432	111.892	98.3093	105.179	95.6284	97.4669	101.842	103.261	93.9273	102.521	105.514	100.328	101.712	104.015	109.181	95.03	101.679	103.185	107.282	111.335	115.713	106.97	96.5027	101.409	100.792	104.853	101.148	113.849	105.805	103.62	111.246	103.824	98.6255	97.0408	103.422	107.878
11	94.6905	105.313	108.948	102.306	100.2	100.744	98.316	109.876	102.385	104.109	102.084	97.7712	99.1336	96.767	112.817	97.0064	105.775	95.9473	96.1364	102.238	103.724	93.5631	103.49	104.998	99.7269	101.727	103.539	109.903	94.3201	101.91	102.64	107.174	113.403	116.294	107.575	96.4691	101.786	100.476	105.707	101.111	113.37	106.226	105.157	112.584	103.814	98.7996	96.5504	103.543	108.135
12	95.4484	105.945	110.124	102.238	100.498	101.02	97.3887	110.194	100.273	104	102.477	96.0147	99.0643	96.2959	113.349	96.3236	106.179	95.8949	95.5452	102.752	104.524	93.6003	103.861	104.392	99.4578	102.477	103.701	110.334	93.0601	101.459	102.04	107.167	113.75	116.588	107.834	95.804	102.931	100.597	106.252	101.565	113.027	106.611	105.591	113.319	103.84	99.5322	96.0209	104.137	108.547
13	96.5002	105.669	109.844	102.302	100.536	100.246	97.9155	109.983	99.6495	104.315	102.886	94.9317	98.6349	96.1845	113.711	95.1319	106.171	95.5889	94.1997	103.407	105.236	92.8358	104.379	103.552	99.0343	103.316	103.766	109.632	92.131	100.538	101.471	106.807	114.313	115.968	107.312	95.7295	104.195	101.349	106.553	102.388	112.282	107.054	106.278	114.029	103.705	99.2501	95.5754	104.124	107.581
14	95.2329	105.458	110.011	101.115	99.7679	100.565	97.1858	109.367	98.9772	103.823	102.055	93.8121	98.48	95.623	113.991	95.2009	105.704	95.7994	93.0607	103.76	105.663	92.8798	104.053	103.552	98.6754	102.987	103.207	109.769	91.3927	99.8319	100.466	106.872	114.96	115.966	106.517	94.6636	104.331	101.963	106.809	102.924	111.824	107.298	106.258	113.812	104.192	99.7347	95.3894	104.23	108.548
15	94.7978	105.091	110.113	100.489	100.204	101.019	96.3878	108.494	96.0169	103.886	102.012	93.6698	97.5064	94.8855	113.801	94.5734	105.553	95.873	92.2673	104.082	105.806	92.7914	104.71	102.277	99.2073	103.738	103.654	109.646	90.4008	100.375	100.328	107.902	115.546	115.589	106.617	94.5378	105.102	102.003	106.866	103.127	110.862	107.67	106.496	114.217	103.451	99.702	95.2082	104.319	109.24
16	94.0813	104.465	109.457	100.032	99.7404	100.642	97.0623	107.814	94.3383	103.943	102.091	93.1148	97.4516	94.7793	114.188	95.1942	105.094	95.1311	91.8584	103.937	105.686	93.2106	104.456	101.434	98.5932	103.756	103.632	109.471	88.8294	100.118	98.6867	107.266	114.845	114.756	106.353	94.2325	105.497	102.06	106.412	103.231	110.342	107.935	107.214	114.718	103.631	99.5234	95.0874	104.178	108.451
17	93.5061	104.446	108.805	99.9054	100.452	100.271	96.3889	107.014	92.8715	103.749	102.19	91.755	95.7722	94.1536	114.098	93.9616	104.732	95.0533	91.1434	103.961	105.745	92.6227	104.287	100.971	98.2098	104.092	104.203	109.342	88.1785	100.219	97.2364	107.084	115.156	114.53	105.379	93.3644	105.26	102.715	106.558	103.135	109.759	107.678	106.791	114.703	103.113	99.7278	94.9105	103.856	108.717
18	93.649	103.966	108.228	99.2161	100.41	100.316	96.1413	106.102	91.3392	103.407	101.764	91.0289	96.393	93.971	114.322	93.7311	104.442	94.826	90.887	104.107	105.881	92.8784	105.1	100.172	97.8308	104.198	103.828	109.427	87.9894	99.8451	96.6913	107.06	114.858	114.107	104.973	93.8865	105.778	102.68	106.672	103.955	108.984	107.793	106.582	115.079	102.735	99.5768	94.9139	103.67	108.679
19	93.6292	103.441	107.924	98.3912	99.944	100.587	95.7936	105.819	91.6229	103.104	101.614	90.5417	96.0345	93.9097	114.309	94.1785	104.105	94.393	90.2468	104.377	105.298	92.5014	104.557	99.2926	98.155	104.363	103.95	109.633	87.2232	99.372	96.4431	107.259	115.088	113.767	104.686	93.5527	106.174	103.08	106.281	104.237	107.284	108.163	106.642	114.536	102.678	100.185	95.333	104.132	108.304
20	94.1519	102.747	107.638	98.1274	99.9993	100.152	95.8515	104.68	90.7253	102.461	101.509	89.1956	96.0735	93.9328	114.072	94.6766	103.886	95.1593	89.6294	104.241	105.409	92.7088	104.704	98.3097	97.1236	105.308	103.526	109.31	85.7662	99.9438	96.0372	107.76	115.557	113.949	103.772	92.4622	105.92	102.859	105.499	104.478	106.861	108.296	107.143	114.592	102.701	100.105	94.8578	103.657	108.152
21	95.3626	101.954	106.818	96.9881	99.0509	99.6434	95.1379	104.092	89.8323	102.422	101.734	88.4337	96.0804	93.5819	114.781	94.0515	103.92	94.8797	89.1448	104.181	104.723	92.4837	104.853	97.1738	96.2773	105.114	104.083	108.998	85.7407	100.032	95.1867	107.939	115.38	113.044	103.596	93.1381	105.995	103	105.798	104.22	107.006	107.946	106.976	115.115	102.652	100.698	95.4055	103.228	108.788
22	95.0605	101.438	107.311	96.9996	99.2893	99.1521	95.1832	103.515	88.3511	101.64	101.384	88.0753	96.1427	93.3573	114.72	94.0741	103.994	95.0358	88.8961	104.171	105.165	91.8666	105.412	96.6712	95.7384	105.244	103.942	109.244	86.5591	99.1141	94.4697	108.007	115.156	113.221	102.653	92.1709	105.967	102.527	105.828	104.786	106.118	108.315	107.44	115.201	102.609	100.664	95.9496	103.532	108.664
23	96.2313	99.8074	106.333	96.2382	99.2367	99.0012	95.5388	102.961	87.4871	101.617	101.653	88.089	95.7412	93.098	114.477	93.2871	103.305	95.2084	88.8738	104.041	104.922	91.6489	104.88	95.776	95.3731	105.195	103.7	108.876	85.6446	99.1876	94.0239	107.851	114.996	113.197	103.228	92.4243	106.503	103.276	105.66	105.792	104.855	108.384	107.645	114.646	101.711	100.172	95.8984	103.697	108.745
24	97.9358	99.6864	106.452	95.5174	99.1209	98.888	95.2849	102.008	87.4371	101.318	101.001	87.3569	94.9954	92.3524	114.336	93.2536	103.288	94.4628	88.7176	104.094	104.852	92.5114	105.465	94.9639	94.7663	105.22	104.053	108.782	85.7971	99.4259	93.1364	107.529	114.976	113.001	102.879	92.6733	106.577	102.718	104.996	105.459	103.947	108.669	107.177	114.539	100.692	100.497	96.103	102.783	108.241
25	99.2276	98.8119	106.056	94.9348	99.2452	98.0552	96.0788	102.072	87.5741	100.883	100.363	87.0512	94.583	92.6648	114.116	92.9964	102.622	94.1632	88.8695	104.369	104.092	92.0221	105.071	93.9063	94.7089	105.604	104.02	109.073	85.1422	99.1103	92.0199	107.956	115.587	112.262	102.439	92.2989	106.538	103.57	105.749	105.53	104.053	107.801	107.883	115.037	101.37	99.7002	96.4597	103.802	107.935
26	100.11	98.2331	106.493	94.8065	98.6476	97.7622	95.9215	101.807	88.4923	100.686	100.272	86.4409	94.1399	92.2997	113.756	93.4255	102.342	94.6349	88.9766	103.775	104.715	91.8497	104.923	93.5806	93.824	105.782	104.108	108.807	85.8953	98.6183	92.9362	108.618	115.701	112.698	102.592	91.9432	106.73	103.028	105.151	105.958	103.808	108.488	107.486	115.519	101.641	99.6276	96.4419	103.563	108.452
27	101.245	97.1663	106.089	93.2657	98.3802	97.2145	95.4393	101.085	87.5893	99.8524	100.262	86.0919	94.1061	92.5353	113.774	92.7663	102.015	93.6682	88.5409	103.822	103.983	91.7852	105.411	93.5297	94.0043	105.535	104.227	108.633	85.1003	98.5292	92.3878	108.329	115.765	112.162	102.139	91.7191	107.043	102.853	104.857	105.465	103.155	108.002	107.525	115.07	101.415	100.445	96.5096	103.714	108.064
28	102.409	97.4614	106.882	93.1312	98.1241	96.9619	95.9196	99.8402	87.2808	100.163	99.6494	86.1351	93.5526	92.2256	113.992	92.6253	101.391	93.7257	88.1875	104.324	103.852	91.4496	105.118	92.0175	92.7528	105.716	103.821	109.637	84.4885	98.5688	91.989	108.612	115.075	111.991	103.014	91.1246	105.909	102.024	105.202	105.775	102.289	108.005	107.584	114.68	99.9923	100.218	96.7513	102.909	107.582
29	102.849	96.8153	106.988	93.395	98.0276	96.9705	95.193	99.9077	87.7295	99.6964	99.7011	85.9215	93.9506	92.038	114.278	93.2147	100.986	93.3162	88.3065	104.042	103.989	91.2705	105.392	91.1214	92.9026	105.842	103.698	108.878	85.0011	97.7782	92.1242	108.874	115.403	112.089	103.086	91.1546	106.261	102.479	104.861	106.188	102.507	107.844	107.885	115.347	100.334	99.0092	96.2032	102.505	106.913
30	104.673	96.974	106.731	92.6688	97.7261	96.2081	95.3516	99.6021	86.7106	99.4746	99.4886	85.6136	93.4624	91.2023	113.801	93.192	100.814	94.3373	88.4568	103.911	103.416	91.7911	105.322	90.462	92.4728	105.345	103.681	110.054	85.818	98.0139	92.4472	108.189	115.347	110.743	103.406	90.3888	105.456	101.763	104.502	106.164	102.175	107.802	109.004	115.504	100.373	99.2894	96.1496	102.528	107.573
31	105.006	96.3814	107.042	91.6118	97.7114	96.5433	94.0581	99.0229	85.8082	99.1001	99.7667	84.7939	93.3758	91.7152	114.256	92.8578	100.653	93.7895	88.2855	104.552	102.983	91.1809	105.245	89.0523	92.6813	105.102	102.684	109.796	85.8044	98.0771	91.9213	108.319	116.71	110.176	103.437	90.7655	105.552	102.203	104.204	106.095	102.007	107.965	108.824	115.34	99.4664	98.3746	96.1252	102.249	107.504
32	105.732	95.7956	107.734	91.3502	96.6473	95.6595	93.4191	98.1183	85.2877	99.0029	99.5611	84.3916	93.0976	90.9792	113.455	91.9872	100.197	93.798	88.2394	104.509	103.6	91.6466	104.802	88.3607	91.9394	105.882	103.621	110.1	85.9594	98	92.0701	107.535	116.057	110.064	102.554	89.7737	105.088	101.844	104.016	106.402	100.971	108.265	109.188	115.192	99.0571	98.3933	96.1046	102.102	106.925
33	106.086	94.9139	107.428	91.2254	96.7877	95.4263	93.037	97.5741	85.0673	98.9258	99.1604	83.5707	92.9855	91.2204	113.796	91.8811	99.1127	93.7816	88.7157	104.549	103.807	91.3814	104.661	88.0596	91.5283	105.502	103.528	109.649	85.7237	98.0434	91.8078	106.537	115.864	109.942	103.68	89.9409	105.545	101.765	104.323	106.523	100.847	107.943	108.95	114.584	99.4528	98.1583	96.2681	101.869	106.705
34	106.715	94.7813	107.05	90.6143	96.4646	94.48	91.9817	97.1535	84.5846	98.2755	99.6677	82.9713	92.8898	90.2726	113.923	92.2098	99.5282	93.3772	88.3346	104.521	103.121	91.4853	105.148	87.1965	91.3068	104.996	102.9	110.379	86.4163	97.664	91.919	106.466	116.182	109.702	103.704	89.601	105.937	100.966	104.35	105.986	100.53	107.756	108.987	113.547	98.831	97.55	96.536	101.471	107.047
35	107.103	94.3478	106.989	90.5236	96.4435	94.3778	91.892	97.4406	84.0949	97.7015	99.5349	82.1149	92.356	90.1188	113.542	91.7703	98.5619	92.9318	88.5135	104.362	102.952	91.6431	104.772	87.5288	91.4108	105.559	103.179	110.702	86.3204	96.841	91.7171	107.091	115.346	108.684	104.077	89.1717	105.137	101.552	104.156	105.426	99.2815	108.187	109.76	113.466	98.2607	96.8895	96.4494	101.214	107.066
36	107.451	94.5354	107.458	90.4964	95.7888	94.3893	91.4348	96.9463	84.0877	97.4949	99.8526	82.3658	93.2937	90.2082	113.536	91.7646	98.5519	92.996	88.9565	105.118	102.877	91.1925	104.651	86.1305	90.5356	105.827	103.733	110.044	86.8193	97.33	91.6855	106.592	115.748	109.078	103.723	89.3726	105.868	101.983	104.071	105.694	99.9513	108.114	109.54	113.051	98.2501	97.1338	96.47	100.737	106.154
37	107.484	94.8773	106.774	89.7734	95.6287	93.9681	91.4308	96.6152	83.5038	96.8493	99.738	82.1505	93.0856	89.3012	113.68	91.3684	98.1531	92.4149	88.5479	105.062	103.026	91.3807	105.047	85.9424	91.1141	105.79	102.706	110.789	86.7699	97.0144	91.5998	107.144	116.018	109.037	104.01	88.884	105.483	101.017	103.861	105.616	99.0095	108.316	109.551	113.211	97.9182	96.6363	96.1839	100.801	105.849
38	107.724	94.3517	106.961	89.8388	95.1218	93.27	91.8215	95.6322	82.273	96.7065	99.3906	81.5266	93.2997	89.1516	114.05	90.2928	97.508	92.2347	89.081	105.102	102.721	91.4577	104.563	86.5207	90.3018	105.668	103.324	110.015	86.7024	97.5526	92.2668	106.142	116.268	108.78	104.096	89.1836	106.236	100.972	103.607	105.731	99.5874	108.974	110.383	113.451	98.4153	96.6163	96.0739	100.886	106.457
39	107.43	94.127	107.055	88.9797	94.6383	92.5038	92.0305	95.784	81.4795	96.5912	99.443	81.7523	93.081	88.9647	113.443	91.071	97.1224	91.8847	88.2308	105.551	102.311	91.1532	104.834	86.7401	90.4966	105.916	103.344	110.526	87.0053	96.6177	92.3224	105.619	115.933	108.025	103.622	88.7395	105.83	100.876	104.088	105.515	98.5856	108.678	110.179	112.19	97.7589	96.7206	96.0998	100.347	105.394
40	107.291	93.4365	107.347	88.94	94.7054	92.6463	91.9642	95.3636	80.6803	96.7573	99.0168	81.3059	93.0588	88.4352	112.865	89.5519	96.7878	91.671	88.4996	105.604	102.446	91.7057	104.078	87.034	90.8148	105.489	103.563	111.128	86.2443	96.5375	91.9789	105.608	116.164	107.535	103.514	88.2732	105.627	100.607	103.863	105.061	99.1788	108.706	110.499	111.64	96.8376	96.6924	96.2037	100.065	106.491
41	107.77	93.2502	106.498	88.7697	94.2723	92.2626	92.2758	94.8617	80.8334	95.6535	99.2676	81.6586	92.7379	88.548	112.947	91.0794	96.963	91.2958	88.3888	105.791	103.035	92.0317	104.243	86.2137	90.6679	105.726	102.356	111.387	87.4167	96.5377	92.3738	106.003	115.396	106.769	103.908	87.9131	105.501	101.068	103.571	104.741	98.9021	110.059	109.497	111.707	97.7046	96.7521	96.318	99.4788	107.564
42	107.891	92.6853	106.622	88.3839	93.4192	92.0696	92.1291	94.7559	80.8489	95.9406	99.3278	81.44	93.7583	88.3051	112.72	90.6022	96.5664	91.1001	88.5096	106.21	102.56	91.4515	104.686	86.1618	90.8349	106.581	103.623	111.772	87.3515	96.5984	92.4943	105.283	115.333	107.149	104.243	88.0483	105.133	101.357	103.305	104.686	98.451	110.529	110.196	111.725	97.1773	96.6056	95.6385	99.472	106.638
43	108.146	92.3768	106.647	88.0493	93.3728	91.3777	92.1495	94.7148	80.5903	95.7576	98.8693	81.0853	93.4323	88.1629	113.148	91.0064	96.7759	91.2239	88.705	106.29	102.842	91.793	104.625	85.2366	90.8622	105.685	102.748	111.614	87.6079	96.2802	92.9973	104.228	115.25	106.369	104.779	87.3821	105.784	100.715	103.57	104.757	98.3792	109.872	109.542	112.47	96.9991	96.9408	95.9272	98.7705	106.386
44	108.126	92.5651	105.691	87.4262	93.0255	92.0523	92.6616	95.0415	81.8637	95.5893	98.6034	81.0377	93.5101	89.2274	113.173	90.7265	96.7056	90.4124	88.2025	106.433	102.606	92.0975	104.69	85.2603	91.3716	106.077	103.468	111.592	87.256	96.4223	92.3497	105.825	115.769	106.925	104.713	87.1427	105.237	101.18	103.495	104.326	99.1858	110.073	109.472	111.521	95.8322	96.892	96.0239	99.3813	106.473
45	107.231	92.3056	105.824	86.0424	92.7937	91.1394	92.47	94.9481	80.9656	95.6122	99.1064	80.116	93.1927	88.442	113.226	92.1469	96.3906	90.3681	88.1766	107.203	103.823	92.0232	104.425	84.3345	91.0871	106.524	103.84	111.785	87.9985	95.6724	92.582	104.686	115.631	106.144	104.482	86.4983	104.719	100.541	103.489	104.506	99.0034	110.379	110.467	110.674	95.8469	96.9309	95.7771	98.8187	107.339
46	108.876	91.275	105.093	86.269	93.0736	90.843	92.6785	94.8698	81.4438	95.3447	99.309	80.8092	93.6726	88.7336	113.206	91.676	95.914	90.1813	88.3749	106.854	104.094	92.2556	104.113	84.2104	90.6356	106.816	103.564	111.625	88.6899	95.8045	92.1983	104.513	115.798	105.868	104.233	86.9533	105.815	101.139	103.255	104.008	98.7358	110.166	109.995	110.13	95.1211	96.2699	95.9757	98.8868	106.626
47	107.318	91.6289	104.667	84.826	91.4636	91.1679	92.4916	95.2545	81.7467	94.9427	98.5265	80.0469	92.8316	88.9452	113.311	91.323	95.8672	89.9536	88.4913	107.752	105.197	92.13	103.707	83.3431	91.1077	106.618	102.734	112.128	88.0152	95.1119	92.3362	105.102	115.731	106.028	105.277	86.4942	105.968	101.238	103.932	104.954	98.8738	110.59	110.394	110.867	95.5933	97.1539	96.3947	98.8932	107.383
48	108.108	90.5051	104.463	84.6478	91.8492	91.2844	93.5468	96.093	81.4212	95.2084	99.2456	80.7912	92.7595	88.7745	113.267	91.9386	95.7296	90.0977	88.1667	107.835	106.12	91.9993	104.136	82.0261	90.7183	107.264	102.734	111.662	89.0309	95.4041	92.4481	104.366	115.099	105.408	106.155	85.7813	105.332	101.243	103.364	104.29	99.4581	111.284	110.416	109.388	95.0178	97.7966	95.8754	98.8072	107.061
49	107.752	90.1336	103.919	84.4786	91.5788	90.7993	93.2331	95.7115	80.9469	95.1013	99.3224	79.7741	93.1139	88.552	113.412	92.8119	95.5161	89.6936	88.3655	107.957	106.39	92.1745	104.598	82.3165	91.196	106.648	103.374	111.881	89.1657	94.4526	91.8439	104.747	114.484	104.814	105.749	85.765	105.665	101.084	103.264	105.003	98.7608	110.95	111.51	108.849	95.3794	97.5	96.4195	98.6222	106.304
50	107.006	89.4419	103.191	84.4923	91.1134	90.9769	93.5921	96.0814	80.2889	95.4746	99.3268	78.9479	92.7737	88.3476	113.457	92.1996	95.5032	89.5939	88.1965	108.428	106.962	92.2956	104.438	86.1753	91.9319	107.008	103.59	111.569	88.473	94.9442	92.4307	104.474	115.318	104.8	105.168	85.6259	106.06	101.973	103.461	105.262	98.5327	111.086	112.233	108.094	94.7618	98.84	96.3073	98.2406	105.931
51	106.914	89.9542	102.554	83.8223	91.3699	90.3958	94.5878	96.386	79.5537	95.0186	99.5471	79.2175	92.5822	88.6658	113.475	92.8593	95.3827	89.7933	88.0926	108.941	107.733	92.3757	103.963	85.6528	91.7592	107.404	102.521	111.939	89.6247	94.2765	93.265	104.283	114.816	104.244	105.412	85.6313	105.597	101.477	102.95	104.557	99.0679	111.799	111.159	105.318	94.8842	98.8649	95.4898	97.897	106.585
52	106.815	89.6898	102.285	84.2269	91.0164	90.2613	94.4925	96.5953	79.1752	94.8194	99.2216	78.3109	93.0785	88.7037	114.159	92.9329	95.0647	89.7233	88.2345	109.058	108.587	92.5465	104.194	87.4691	91.8078	107.438	102.635	111.884	90.1402	94.0787	92.9889	104.21	114.84	104.571	106.706	84.9343	105.886	101.639	103.115	105.004	98.2442	111.442	110.914	104.215	94.5619	98.8748	96.9208	97.6891	106.149
53	106.312	89.4927	101.888	84.6281	91.0445	90.3461	94.7224	96.2302	79.3732	94.4419	99.5041	78.2692	93.3177	88.2299	113.511	92.2786	95.4383	90.5363	88.2853	108.77	109.103	92.6111	104.294	88.4463	92.0714	106.72	102.71	111.694	90.4129	94.4224	92.9346	104.046	115.183	104.06	105.857	85.2026	106.472	101.949	103.36	104.517	99.3244	112.658	111.898	102.411	94.0445	99.1	95.8424	97.1527	105.936
54	107.034	89.5246	101.994	84.0849	90.9136	90.2957	94.7609	95.9673	78.5388	94.6279	99.4363	78.7545	92.722	88.6591	114.524	91.8324	94.671	90.5053	89.0095	108.408	109.847	92.2881	104.134	88.7487	92.0536	107.102	103.588	111.269	90.9792	94.2396	93.0321	104.165	114.177	102.894	106.214	84.4444	106.547	102.199	103.431	104.539	98.8213	112.786	111.992	103.059	93.8108	99.1079	96.1954	96.9561	106.781
55	107.04	89.4951	101.174	83.8139	90.2246	89.6968	93.9715	95.9171	78.197	93.8208	99.1058	77.6425	93.1304	89.0674	114.274	91.2715	94.4235	90.0646	88.7235	108.489	111.662	92.5934	104.662	89.0998	92.1581	108.108	103.403	112.104	91.5432	93.8695	93.5953	104.471	114.844	103.765	105.729	84.696	106.724	101.964	102.949	105.242	98.1971	112.522	111.755	103.559	93.95	99.3147	96.2879	96.7218	106.376
56	108.86	88.7211	101.535	84.9976	90.0294	90.2038	93.9762	95.3914	79.5403	93.8518	99.3442	78.8806	92.9312	88.9472	114.506	92.4565	94.4192	90.467	89.1725	108.928	111.437	92.482	104.228	88.9898	92.3185	108.038	103.26	112.518	91.725	94.4373	93.0617	104.134	114.091	103.439	105.384	84.3613	106.865	101.652	103.475	105.415	98.9731	113.017	111.688	102.034	93.7504	100.147	96.1686	96.5734	106.337
57	107.67	87.8873	100.991	85.5567	89.7231	90.5668	94.3885	95.6638	78.5627	93.9949	99.5217	78.3347	92.7308	88.569	113.763	92.272	94.2303	90.3283	88.9576	108.013	112.387	92.8908	103.617	85.1036	93.2066	107.794	103.648	112.024	92.6399	94.2279	93.4833	104.21	113.119	103.961	106.633	84.5673	106.036	101.676	102.886	105.738	98.1667	112.726	112.103	102.65	93.486	100.214	96.6365	96.6762	106.797
58	109.029	87.8576	101.025	84.4619	89.3283	89.533	94.3742	95.5149	78.3958	94.2615	99.5325	78.8427	92.4261	88.631	114.261	91.8511	94.7453	91.6094	88.5163	107.918	113.863	91.9105	103.989	80.2858	92.47	107.859	103.135	111.86	92.5432	94.102	93.1888	103.629	113.694	103.396	106.237	83.8454	107.066	102.057	102.709	105.918	98.7907	113.397	112.145	100.672	93.8157	101.607	96.2632	97.356	106.729
59	109.589	86.5278	100.261	84.6359	89.4311	89.642	93.8312	96.1838	78.2012	94.3024	100.966	78.8257	93.0021	88.2521	114.022	91.9769	95.032	91.7541	88.3637	107.234	113.853	91.8798	104.106	86.771	92.4247	107.762	103.973	111.801	92.0707	94.2868	93.4419	101.999	114.051	103.205	106.641	84.6309	107.054	101.969	102.649	105.746	98.7112	113.733	112.037	100.115	93.5131	101.646	95.8715	97.1695	105.932
60	109.303	87.2754	100.61	84.862	89.2698	89.6947	95.1445	95.6804	77.9825	93.6626	101.85	78.1645	93.13	88.3936	113.409	92.359	93.8248	91.6349	87.9365	107.214	115.193	92.313	103.041	79.6503	92.9353	107.923	104.016	111.976	93.4264	94.042	93.2447	102.968	113.478	103.362	106.794	84.2928	106.39	101.949	103.101	106.118	97.9084	113.675	111.935	102.076	93.4758	101.686	95.572	96.7825	106.453
[truncated: 251 more columns]

## Sheet: y27 round
position	1	1	1	1	2	2	2	2	2	3	3	4	4	4	4	5	5	5	5	6	6	6	6	6	1	2	3	4	4	5	6	6	6	7	7	7	1	2	2	3	3	3	3	3	4	4	4	4	4
cell	4	8	19	20	1	2	4	7	8	10	12	2	8	11	17	15	20	22	23	1	3	5	6	11	2	7	13	3	4	6	1	4	11	1	8	9	4	2	9	1	9	12	13	14	2	3	11	16	17
t (min)
0	100	100	100	100	100	100	100	100	100	100	100	100	100	100	100	100	100	100	100	100	100	100	100	100	100	100	100	100	100	100	100	100	100	100	100	100	100	100	100	100	100	100	100	100	100	100	100	100	100
1	100.655	100.517	99.289	100.294	100.126	100.688	98.5291	100.404	99.4898	101.087	99.5921	101.814	100.706	100.238	98.9955	100.713	99.3384	100.215	100.093	100.552	101.471	99.49	100.445	100.528	98.8489	100.227	99.4961	99.9662	99.4669	100.077	100.816	99.015	100.372	100.198	99.6284	99.7787	99.4265	101.197	99.3752	98.2016	100.892	98.0748	98.1464	99.6774	100.55	99.6829	100.376	100.864	99.7799
2	100.255	101.449	99.1015	100.394	98.6299	100.805	97.7266	100.441	99.2236	102.222	100.357	103.323	101.525	99.8372	99.4768	100.106	98.0136	99.3451	98.5246	101.508	101.53	99.758	100.3	100.879	98.8101	99.455	99.5287	100.176	99.8178	100.292	101.022	97.9892	100.347	100.356	99.4547	99.9059	98.8005	101.276	100.136	96.5328	101.266	97.7255	97.5328	97.9297	98.1627	99.1434	100.115	100.844	99.7683
3	100.15	102.068	99.1733	100.214	99.6014	101.425	96.9448	100.53	99.2212	101.981	100.951	103.774	103.655	100.898	98.8068	101.347	97.5977	98.8473	98.6843	102.699	102.444	100.03	101.029	100.792	98.4568	98.618	98.7937	99.9465	99.5394	100.555	103.063	98.1122	100.126	100.724	99.2934	99.9069	99.023	101.359	99.8437	95.9592	101.115	97.3174	96.0733	98.4092	98.5319	98.5801	100.775	102.322	99.051
4	100.799	102.225	98.1985	99.5451	98.9843	101.66	96.879	99.6656	99.1309	102.165	100.908	104.39	103.404	101.019	98.452	102.579	97.3986	98.1956	98.5039	103.652	102.49	99.1895	101.004	100.709	97.9859	98.3873	98.3458	99.8956	99.6382	100.546	104.757	98.2256	100.484	100.843	99.4935	98.6816	99.7649	101.182	100.42	94.9902	101.73	96.7962	94.9003	96.8423	98.2457	97.5121	100.619	102.327	98.8312
5	101.017	102.908	98.4179	99.396	99.3032	101.577	97.5458	100.352	99.5079	105.097	101.819	106.456	104.992	101.026	99.1006	104.96	98.0135	99.3893	98.4849	106.155	105.789	99.7224	100.327	101.337	98.9622	99.4024	98.4589	100.584	100.013	101.857	109.538	98.0557	99.3565	101.407	99.4034	99.5475	101.945	102.058	100.195	94.9285	101.899	97.3855	93.6993	96.2304	97.6015	97.7821	101	105.132	99.0306
6	101.843	105.101	99.2109	100.972	100.315	102.961	97.1577	100.683	99.8525	106.554	101.328	107.576	106.437	100.792	100.143	104.64	97.6357	99.9032	98.5789	106.939	104.421	99.6721	101.448	101.379	98.7361	99.8115	99.1265	100.492	100.109	102.083	110.015	97.6015	98.9778	100.304	99.8603	99.5698	102.731	102.068	99.854	95.1453	101.801	96.5787	93.2104	95.7969	96.9537	97.3404	100.678	105.425	98.1899
7	101.516	104.956	98.986	101.609	101.078	103.399	97.3678	99.9082	100.489	107.038	101.574	107.786	106.433	101.303	100.076	104.373	97.7758	99.6954	98.2434	106.946	104.824	99.8512	101.944	100.232	98.6182	99.4128	98.8648	100.604	100.449	102.439	110.55	97.9151	99.1541	100.833	99.4304	98.9446	101.984	102.645	101.005	95.3949	101.681	96.5605	93.2778	94.9805	95.7812	97.0735	100.502	106.653	98.6474
8	102.281	105.333	99.4791	101.441	100.594	103.71	95.968	98.5183	99.6839	107.221	101.356	107.064	107.429	100.722	100.04	105.482	96.7258	99.7226	98.7294	106.045	105.192	99.4122	102.545	99.8334	98.8051	98.7377	97.7272	100.692	99.8962	104.332	111.509	97.3141	100.096	101.502	99.766	99.1961	102.34	102.134	99.9109	94.1748	101.404	96.4297	92.9096	93.9695	95.2739	97.044	99.7082	106.035	98.1613
9	101.78	105.425	99.6897	102.514	99.5223	103.495	96.3921	98.2899	98.7946	107.092	100.26	106.72	106.484	101.084	100.019	105.755	96.506	100.603	98.6686	105.354	104.402	98.3472	103.227	99.7187	98.3514	97.7079	97.8329	100.778	100.293	104.491	111.462	97.1623	100.365	102.159	99.8849	98.3591	102.214	102.066	99.9258	95.0355	101.299	95.6349	92.4245	93.2197	95.9415	96.6613	99.6486	106.082	98.373
10	101.706	105.809	99.8261	102.789	99.7192	103.435	96.2254	98.0365	98.5202	105.154	100.58	105.207	107.936	101.264	99.6649	106.203	96.7674	100.653	99.0086	104.382	103.518	98.0968	102.662	100.105	98.0484	97.6069	98.2715	100.503	100.278	105.342	111.758	97.7585	100.243	102.125	100.027	98.6222	101.815	101.947	99.5359	95.0656	100.886	95.2521	92.9108	93.2442	94.8275	97.3426	99.1264	106.94	98.0936
11	101.304	106.663	100.391	102.967	99.1545	103.065	96.0688	96.6666	99.146	103.399	100.456	105.371	106.559	100.635	99.5056	106.282	95.9706	100.862	99.0979	103.956	104.348	98.2054	103.278	100.038	97.9662	97.8549	97.7402	100.631	100.141	106.386	111.776	96.562	100.012	102.568	100.566	98.5892	102.056	101.617	98.7395	94.7199	100.678	94.8808	92.4696	92.6319	94.4069	96.813	99.0209	106.748	97.9471
12	101.406	106.5	100.957	103.208	98.74	102.879	95.9883	96.3347	97.6384	102.184	100.553	105.055	107.78	101.416	100.135	106.449	95.8917	101.676	100.211	103.195	104.24	97.7155	104.33	99.9248	97.9199	97.4686	98.3805	100.069	99.9667	107.121	111.626	97.7717	100.46	102.644	100.812	98.3713	101.612	102.213	99.0203	95.7964	100.774	94.782	92.5395	92.4349	94.4026	96.3178	98.8018	106.098	97.5819
13	100.584	107.617	101.387	103.673	98.6176	102.792	94.2179	95.2753	97.9367	100.723	101.1	105.184	107.544	101.097	101.196	107.893	96.1208	101.785	99.812	102.042	104.415	97.072	104.535	99.6557	98.2035	98.3768	98.2598	100.155	100.068	108.13	111.45	96.7028	100.863	102.603	100.54	98.9436	101.423	101.747	98.4661	95.3283	100.807	94.3459	92.4339	92.3181	95.1996	96.6559	99.8567	106.01	98.2425
14	101.111	107.142	100.744	103.48	99.028	103.635	94.2863	95.4013	96.9476	98.7239	100.998	104.552	107.36	101.198	100.784	108.27	96.019	102.107	100.414	101.281	104.438	96.565	105.203	99.6743	98.4859	98.4433	97.9161	100.493	100.46	108.438	111.281	97.7163	101.286	103.161	100.411	98.7882	100.934	101	98.1277	95.9859	100.197	93.9467	92.5269	92.4962	94.7268	96.2322	99.3826	105.39	97.4294
15	100.33	107.355	102.08	103.026	98.4361	103.19	94.3394	95.192	97.4533	99.4692	101.492	103.611	106.589	102.066	101.229	107.962	96.1197	101.943	100.174	100.782	104.298	96.0185	105.112	99.9367	98.0528	98.4342	97.964	100.238	100.453	109.451	111.049	96.3242	101.62	103.36	100.289	98.0806	100.882	101.261	98.0709	95.6891	100.207	93.8891	92.2587	92.7787	94.0671	96.2442	99.213	105.554	97.8997
16	100.381	107.168	101.66	103.601	98.5534	104.199	94.3754	94.7531	97.0549	99.2158	101.697	104.092	105.608	101.138	101.047	108.181	96.0606	103.259	100.818	100.757	104.881	95.6266	105.715	100.288	98.76	97.4849	97.9193	100.085	100.476	110.349	111.032	96.1128	101.413	103.747	100.55	98.9716	100.675	101.25	98.7089	95.687	100.269	93.7728	92.6312	92.0818	94.5848	96.8133	99.5022	106.425	97.372
17	99.5766	107.112	101.533	103.424	98.2029	103.574	93.3755	94.4882	97.2914	98.4995	101.447	104.327	105.303	101.252	100.829	108.589	96.2367	103.179	100.875	100.918	104.677	96.0075	105.841	100.427	99.0134	97.6545	98.1654	99.9477	100.601	111.437	111.106	96.7295	101.124	103.528	100.669	99.0705	101.047	101.41	98.4405	95.3319	99.9234	93.4128	91.9021	92.1124	94.6952	97.4833	98.2219	106.091	97.5331
18	99.4686	106.818	102.625	103.698	97.6078	104.359	93.5975	93.7713	96.2378	98.8198	101.936	104.466	105.134	100.857	100.94	109.078	96.1737	103.076	101.727	101.014	104.247	95.7185	106.04	100.812	99.3025	97.9303	97.4511	99.9183	100.57	112.502	110.224	97.0245	101.115	103.979	100.57	98.8785	100.863	101.699	99.4367	94.9134	99.3467	93.4156	91.9348	92.9454	94.5388	97.5813	98.6878	106.456	97.5762
19	99.5225	107.123	102.191	103.354	98.2781	104.078	93.1172	93.9406	96.9307	98.5787	102.59	103.893	104.781	100.982	101.285	108.192	95.285	103.813	101.767	100.165	104.914	95.8255	106.417	100.729	99.662	97.703	97.8789	99.9144	100.854	112.899	110.755	96.7359	101.604	104.475	100.528	98.7582	99.5232	102.181	99.1419	96.1794	99.8949	92.9685	92.2776	92.272	94.6684	97.2633	98.413	106.596	97.55
20	99.5309	107.833	102.839	103.413	97.9486	103.881	92.4587	93.2586	96.9909	98.2487	102.801	103.982	104.949	101.766	101.61	108.756	95.4171	104.015	102.087	100.212	105.036	94.9632	106.285	100.475	99.3514	98.1242	98.3068	99.1474	100.614	113.601	110.737	97.4892	101.551	104.462	100.316	98.6347	99.5592	101.806	98.503	95.5698	99.3913	92.6274	91.7709	92.635	95.0135	96.6117	98.1778	107.06	98.268
21	99.2446	107.734	103.326	103.751	98.2663	103.743	92.4293	93.1349	96.9343	98.286	103.307	103.877	104.287	101.891	101.731	109.818	95.3282	104.519	102.746	100.524	104.587	94.8619	106.55	100.457	99.4693	97.4933	98.3076	99.6528	100.88	113.823	109.987	97.3228	101.388	105.074	100.901	98.9334	99.096	101.702	97.9182	95.7386	99.5932	92.7481	91.6841	92.3794	95.3693	97.3733	98.6397	106.412	97.7766
22	99.06	108.171	102.906	103.41	96.9004	103.792	92.3217	92.9725	96.2011	98.2696	103.619	103.87	105.053	101.796	102.324	109.731	94.7919	104.409	102.827	100.384	105.992	95.2059	105.765	99.9201	99.6359	97.846	98.3694	99.7394	101.11	114.771	110.58	97.305	101.901	105.022	100.065	98.4644	99.0618	101.94	98.2581	95.3761	99.4007	93.1575	92.1716	92.0605	95.4734	97.1196	98.8147	106.695	97.4199
23	98.9638	108.03	103.542	103.644	98.1227	103.72	93.018	93.3726	96.8426	97.7177	104.634	102.867	105.055	102.044	102.753	109.75	94.4474	104.803	102.937	100.852	106.351	95.4526	105.965	100.968	99.7531	97.6744	98.9587	99.793	101.235	115.493	110.719	96.7383	102.054	105.094	100.208	98.7582	99.0534	101.553	97.4893	95.674	99.5625	92.899	91.4879	92.4515	95.9699	96.7198	99.5536	106.828	97.739
24	98.3197	108.051	103.824	103.571	98.1744	104.291	92.5247	93.0782	96.8674	98.2388	105.422	104.247	104.484	102.081	102.82	109.664	94.106	105.134	103.151	100.33	107.672	95.1713	106.2	101.409	99.7076	97.9046	98.6273	99.44	101.039	114.981	110.05	96.5417	101.914	105.183	100.714	98.6748	98.6958	101.766	98.0128	94.9821	99.3908	93.0414	91.5571	92.3206	95.371	97.4121	98.8244	105.817	97.3036
25	98.583	108.723	104.195	103.265	97.8498	104.375	93.2768	92.2628	96.1302	98.4884	105.894	104.166	104.133	102.179	102.414	109.906	93.8723	105.062	103.786	101.33	107.245	94.871	106.428	100.205	99.985	97.7582	98.2643	99.5797	101.406	116.184	110.081	96.9588	101.825	104.767	101.302	98.7415	99.034	102.16	98.4286	96.1659	100.211	93.2337	91.338	92.0487	96.713	97.0861	99.8187	107.267	97.7751
26	98.1575	109.024	104.045	103.55	98.3541	104.456	92.8668	92.624	95.7238	98.0657	106.491	104.256	104.764	102.475	102.688	110.013	93.3623	104.288	103.444	101.563	108.023	94.6257	106.451	101.026	100.179	97.5943	99.1345	99.7918	101.233	116.273	110.518	96.6705	101.753	104.767	100.967	98.8528	98.5583	102.414	97.9706	96.4269	100.641	92.9478	92.0143	91.9202	97.168	97.4583	99.8357	107.205	97.81
27	97.7508	108.46	104.257	103.293	98.7883	104.308	92.7584	92.5133	95.6844	98.5369	107.035	103.797	104.137	102.14	103.166	109.998	92.8582	104.327	104.185	101.208	107.521	94.609	106.778	100.179	100.329	97.1333	98.7024	99.4731	101.394	116.623	110.981	96.3842	102.097	106.036	101.574	99.1435	99.0128	102.333	97.89	96.2676	99.7941	94.1312	92.5298	91.6169	96.239	98.1967	99.9525	107.878	97.3521
28	97.9955	108.746	104.29	103.378	98.3955	104.37	92.6272	92.323	95.4429	98.3022	106.724	103.545	104.576	102.672	102.922	109.417	92.4091	104.238	103.915	101.675	108.369	94.3455	106.403	100.875	100.596	95.8797	98.9715	99.9211	101.729	116.454	110.642	97.2391	102.34	105.996	101.798	98.596	98.9848	101.835	97.3803	96.5211	100.341	93.6491	92.4954	91.4334	97.0013	97.6933	100.625	107.672	97.9871
29	98.0544	108.576	104.157	103.594	98.1907	105.083	92.0066	91.6843	95.6396	98.7793	107.994	103.276	104.009	102.821	103.151	109.67	92.0761	104.006	103.933	101.591	108.041	94.6452	105.998	101.17	101.083	96.7827	98.6286	100.077	102.079	117.46	110.36	97.5635	102.495	105.603	102.042	99.1244	99.1924	101.225	97.1363	96.4807	100.283	93.53	93.5422	91.6765	96.5728	97.9091	99.7547	107.865	97.8716
30	97.5692	108.592	104.009	103.358	97.717	104.65	92.6156	91.5953	95.702	98.5196	107.65	103.862	103.857	102.827	103.758	108.939	91.7638	104.43	104.892	101.539	108.398	95.0932	106.123	101.476	101.022	96.4937	99.1332	100.479	102.429	116.386	111.379	97.8048	103.26	105.145	102.569	98.4841	99.0028	101.77	97.1038	96.504	100.097	93.656	93.8657	90.9896	97.3904	97.5026	100.624	108.647	97.0335
31	97.4121	109.137	103.912	102.971	98.1042	104.605	92.0504	91.5773	95.9534	98.4814	108.069	102.671	103.517	103.45	103.948	109.667	91.4699	104.401	104.067	102.044	108.397	94.0312	106.333	102.081	101.152	96.8108	99.0489	100.014	102.521	116.868	111.294	97.6193	103.159	106.502	103.291	99.5884	99.5817	101.735	97.7939	96.5837	100.001	93.9132	93.8637	91.3686	96.7059	97.8897	100.806	108.464	97.4134
32	97.4301	108.996	104.539	102.592	98.5925	105.292	91.8697	91.2835	95.5094	99.2933	108.767	103.412	103.452	103.549	103.454	110.542	91.3988	104.54	103.997	102.107	108.931	94.4115	106.36	102.142	101.189	96.6133	98.947	100.129	102.678	117.033	111.42	98.0834	103.488	106.183	103.33	99.2451	99.3695	100.986	97.0727	96.3914	99.6384	93.7362	93.9217	90.912	97.897	97.6798	100.739	109.072	96.8968
33	97.2753	109.703	104.044	103.611	98.1142	105.549	92.1071	90.8778	95.7368	99.2731	109.11	103.27	102.652	103.813	103.957	108.99	90.8964	104.007	104.18	103.034	108.536	94.8843	105.712	102.297	101.859	96.4739	98.5102	99.7891	102.636	117.027	112.397	97.5505	103.169	106.398	103.467	98.7459	99.5365	101.481	97.7761	96.5556	99.6326	93.4561	94.7246	91.119	99.0685	97.3852	100.01	108.813	97.0611
34	97.4612	109.97	104.604	103.188	97.6948	105.436	91.8183	90.8386	95.9204	99.3091	109.554	102.45	103.911	103.704	103.775	108.843	90.3338	104.213	104.488	102.653	108.752	95.1253	105.978	102.319	101.187	96.8675	99.1766	100.066	103.071	117.592	112.332	98.1195	103.762	106.54	103.139	98.8645	100.232	102.08	96.61	96.8683	99.6073	93.1513	94.0424	91.7751	100.221	98.2133	100.171	108.869	96.922
35	96.8563	109.395	103.912	103.213	97.6557	105.31	92.1458	91.0086	94.9258	99.1428	110.919	103.064	102.551	104.348	103.474	108.085	91.4109	104.456	103.942	103.668	109.683	95.2788	106.826	102.174	102.377	96.8314	99.1419	100.045	103.413	117.722	112.805	98.5955	104.392	106.26	103.183	98.4281	100.334	101.274	96.868	96.4161	100.034	93.7063	93.9976	91.4048	101.194	97.7728	100.218	109.55	97.3346
36	96.7927	109.927	104.874	103.119	98.1075	105.778	91.5678	90.8646	95.7203	98.8815	110.528	103.247	102.762	104.94	103.509	109.497	90.7205	104.768	103.605	102.488	109.016	95.3189	106.662	102.366	102.607	96.1222	99.1578	99.6596	103.329	117.672	113.066	98.5318	104.612	106.899	104.025	99.7182	100.161	101.295	96.6178	97.203	100.023	93.6008	94.1399	91.7446	100.978	97.551	100.794	109.768	97.2561
37	97.3054	110.386	104.644	103.315	97.99	105.541	91.9489	90.8835	95.7289	99.5262	111.015	102.896	102.899	105.066	102.984	109.738	90.5994	104.579	103.978	103.641	109.074	95.7182	105.859	102.053	103.387	96.1051	99.5029	100.101	103.86	118.76	112.651	99.1745	105.114	106.607	104.077	98.4106	100.288	101.48	98.5778	97.0987	100.144	93.6427	94.0541	91.59	101.643	97.891	101.246	109.52	97.8738
38	96.8825	110.233	104.83	103.606	98.1934	105.621	91.4806	90.8368	96.4782	99.7524	111.552	102.889	103.28	105.321	103.145	109.032	90.5457	105.197	103.661	103.84	107.746	95.1671	106.574	101.605	103.126	96.1742	99.3225	100.005	104.1	118.029	113.195	100.35	104.613	105.932	104.186	98.5752	101.397	100.992	97.3426	97.134	100.553	93.9685	93.9754	92.3681	103.466	97.7304	101.002	109.841	97.8052
39	96.8294	110.739	104.633	103.273	98.3541	105.639	91.6953	90.4377	95.8844	99.4303	111.086	103.448	103.226	106.332	103.113	109.445	90.6015	104.623	104.017	103.99	109.023	96.1998	106.53	102.073	103.94	96.4601	99.5046	99.4993	104.544	117.005	113.509	98.8801	106.178	105.889	104.173	98.7156	101.339	101.061	97.186	97.1252	100.787	93.7479	94.191	91.5042	104.999	98.2642	101.184	110.182	98.3232
40	96.9881	111.408	104.297	102.797	97.5723	105.702	91.1401	90.5725	96.5529	100.293	111.938	101.949	102.888	106.568	103.502	109.341	90.4144	104.287	103.973	103.903	109.121	96.245	106.928	102.522	103.938	96.7302	99.7171	99.3025	103.75	116.877	114.111	99.0002	106.459	106.662	105.329	98.933	101.392	100.682	97.3993	97.6572	100.893	93.7611	93.7795	90.911	107.744	98.1062	102.003	110.246	99.5674
41	97.4309	111.055	105.196	103.68	98.1404	106.057	91.5345	90.4313	96.2624	100	112.045	102.494	101.911	107.204	103.098	108.19	90.6248	103.765	105.022	104.458	109.611	96.3213	106.585	101.998	104.349	97.0566	99.9391	99.7264	104.652	116.706	113.765	99.4821	106.517	106.057	105.443	98.9716	101.542	100.675	97.7458	97.7575	100.705	94.2844	93.6695	91.394	109.179	98.1773	100.97	111.201	99.2875
42	97.0635	111.171	103.97	103.484	98.517	106.572	91.6014	89.7551	96.9751	100.328	112.088	102.154	102.788	108.238	103.241	109.19	90.4976	104.077	104.749	104.114	108.756	96.5403	106.53	101.497	104.699	96.111	100.815	99.016	104.655	117.259	114.576	99.0292	106.409	106.769	105.672	98.77	101.893	100.84	97.3852	98.3123	100.515	94.2486	94.1387	91.3208	111.167	98.3347	101.919	111.093	99.909
43	97.2507	111.532	104.232	104.082	98.4414	106.758	91.1932	90.3859	97.38	99.9177	112.825	102.345	102.902	109.252	104.895	109.621	90.4647	104.372	104.705	105.381	109.033	96.0563	106.422	101.931	104.605	97.0832	101.26	99.8504	105.258	117.109	114.792	99.6499	106.732	107.451	106.607	99.1427	102.076	100.743	96.0916	97.5789	99.9811	94.4822	93.5663	91.0816	112.92	98.7732	101.376	109.986	99.7291
44	97.2956	111.275	104.188	103.993	98.7545	106.515	91.5038	90.1099	96.9442	100.612	112.758	103.031	103.455	109.288	104.489	109.514	90.4166	104.255	105.16	105.155	109.73	95.9575	106.255	102.405	104.635	96.5501	100.523	99.7039	105.353	117.395	114.451	100.402	108.066	106.705	106.375	98.5725	102.922	100.096	97.5355	97.6192	99.908	94.8416	93.9277	91.027	114.649	98.7166	100.998	110.973	99.705
45	97.4229	111.422	104.067	104.312	98.6418	106.171	91.1953	90.2755	96.8647	100.956	113.097	103.457	103.515	110.184	104.804	108.491	90.161	104.413	104.513	106.173	110.088	96.9471	106.551	101.732	104.87	97.2203	100.611	100.003	105.71	117.063	115.269	100.919	108.233	106.586	106.791	98.7635	102.753	100.878	96.5878	97.9886	100.305	94.7562	94.5304	90.3248	116.531	98.1728	101.159	110.737	99.3457
46	97.3417	112.051	103.992	104.713	98.8871	106.751	91.8015	89.4968	97.0521	100.378	112.73	103.108	103.817	111.211	104.883	108.969	90.2652	104.243	104.569	106.053	110.243	95.6452	107.22	102.202	105.325	97.494	101.141	99.662	105.958	116.466	115.553	102.101	108.402	107.454	107.92	99.1694	102.899	101.295	97.0394	97.4661	100.169	95.0013	94.7342	90.4479	117.71	98.6321	100.566	110.045	99.3301
47	97.752	111.732	103.212	104.605	98.9412	106.608	92.017	90.0854	97.2451	100.119	113.343	103.652	103.773	112.153	105.781	106.994	90.0272	104.08	104.936	106.906	109.766	96.4695	106.799	102.337	105.288	97.3571	101.728	99.8281	106.272	117.134	115.436	101.77	109.388	107.671	108.42	98.8816	103.148	100.928	96.8787	97.8357	100.636	94.938	94.6132	91.0597	119.999	98.1008	100.619	111.997	99.828
48	97.8039	111.703	103.638	104.82	99.2821	107.187	91.5832	90.7363	98.1184	100.753	113.385	104.738	103.624	112.161	105.434	108.078	90.3267	104.352	104.998	106.639	110.016	96.7821	107.207	103.017	105.286	97.7918	101.255	99.9904	107.181	117.437	116.017	102.358	110.091	106.514	108.686	98.6432	102.637	100.773	97.1564	98.1579	100.69	95.6253	94.1421	90.7886	122.271	97.9012	100.484	111.296	99.8158
49	97.8009	112.64	104.067	104.325	99.5553	107.497	91.9188	89.9463	97.8812	101.254	113.715	105.601	103.692	113.202	105.739	108.314	90.7547	104.177	104.303	106.946	110.946	96.234	107.113	103.04	105.675	97.6404	102.097	99.8681	107.763	117.31	116.115	101.795	110.63	106.712	109.089	98.3305	103.392	100.282	95.9717	97.7974	100.893	96.0322	94.1115	90.3572	125.194	97.609	100.048	111.725	99.9049
50	98.0566	112.483	103.857	104.705	99.4412	108.411	92.3446	90.5473	97.6572	100.352	114.012	104.943	104.024	113.977	106.77	107.952	90.6988	105.002	104.176	106.56	111.394	96.1916	107.183	103.28	106.274	97.0287	102.138	100.484	108.432	116.954	116.967	103.914	110.685	107.26	110.361	99.2051	103.742	100.676	95.526	98.5592	100.98	96.1268	93.9246	90.8978	125.518	97.8067	99.443	112.025	100.119
51	97.426	112.412	103.755	104.634	99.6795	108.427	92.4652	90.3978	98.1115	100.693	113.635	106.002	103.467	114.919	105.97	108.415	91.4765	104.795	105.066	107.143	110.846	96.5204	107.589	103.22	105.921	97.561	101.975	100.414	108.258	117.27	116.996	104.817	110.995	106.266	109.821	98.2679	104.522	100.544	95.8377	99.124	100.751	96.7656	94.0761	90.9466	127.513	97.7107	99.377	112.497	99.9141
52	98.1428	112.661	104.406	104.3	99.7615	108.839	92.1355	90.6176	98.8708	101.188	114.713	106.833	104.001	115.912	106.267	108.931	90.8918	104.841	104.603	107.075	111.147	97.1633	107.539	103.353	106.2	97.589	102.02	100.391	107.867	117.242	117.686	104.88	110.689	105.722	110.54	97.9792	104.407	100.686	95.6304	99.2758	101.537	95.9961	94.0842	91.1479	129.566	97.4595	98.4828	112.811	99.3384
53	97.5835	113.12	104.582	104.771	99.9714	109.607	92.4015	90.5304	99.6559	100.409	114.918	107.042	104.019	116.613	107.135	108.544	91.2074	104.888	103.862	107.217	111.398	97.2836	107.346	103.083	106.148	97.8374	102.342	100.679	108.035	117.816	119.361	104.962	111.445	106.184	111.139	97.6544	105.133	100.731	95.9936	99.0414	101.443	96.3112	94.2553	91.2416	130.634	97.3438	97.8195	111.962	100.07
54	98.0698	113.45	104.041	104.148	99.9089	110.201	92.5434	90.847	99.2484	101.198	114.633	106.453	103.801	116.679	107.45	108.216	91.2238	104.887	104.084	107.656	111.331	97.2858	107.563	102.838	106.818	97.6864	102.769	100.665	107.939	117.482	120.145	106.242	111.345	106.315	111.662	98.8235	105.602	100	95.4069	98.6488	101.494	96.548	94.4951	91.8917	132.283	97.9335	97.1192	111.194	99.5435
55	97.9239	113.099	104.471	104.659	99.9283	110.567	92.9786	91.1171	100.095	100.458	114.836	108.603	103.008	117.555	108.076	108.684	90.8624	105.148	104.13	106.782	111.98	97.0782	107.591	102.488	106.614	98.451	102.87	100.868	107.847	117.088	120.684	106.503	111.973	106.746	111.261	98.435	105.443	100.515	94.7661	97.9515	102.218	96.5895	95.0893	92.2671	134.01	97.4327	96.3439	111.977	100.113
56	98.1801	113.689	104.638	104.148	99.8885	111.109	93.1358	90.8842	100.087	100.744	114.741	109.676	103.838	117.852	108.014	107.724	91.6012	104.671	104.062	106.51	112.675	97.3389	108.381	103.063	107.091	98.0381	103.022	100.562	107.092	118.17	119.677	106.572	111.288	105.95	112.031	98.5364	106.447	100.137	95.9838	98.406	101.702	96.5965	94.0912	91.423	134.876	97.7278	96.4899	111.719	100.733
57	98.906	113.525	104.902	103.853	100.292	111.457	93.2303	91.6839	101.107	101.574	114.96	108.723	103.33	118.298	108.42	107.808	91.8416	104.84	104.177	106.264	111.904	96.7421	107.658	102.621	106.943	98.3328	102.861	100.828	106.933	117.602	119.198	105.729	112.564	106.751	111.568	98.873	106.959	99.5969	95.2417	98.7255	102.024	97.1505	94.0812	92.1181	136.008	97.3731	96.2978	112.371	100.218
58	99.3623	114.089	105.16	104.152	100.739	112.367	92.8699	91.2692	101.592	101.676	115.382	109.919	102.561	119.1	108.296	108.021	91.9401	104.801	104.138	106.444	112.126	97.4617	107.383	102.525	107.271	98.7776	102.294	101.074	107.446	118.212	119.657	107.265	112.52	106.873	112.209	99.4096	107.224	100.361	95.9292	98.4734	102.039	97.0629	93.9124	92.069	138.334	98.0769	95.8556	112.296	100.582
59	99.0872	114.884	105.377	103.196	100.349	112.83	93.6741	91.8981	101.94	101.779	115.515	110.25	103.89	119.51	109.36	109.222	91.5654	105.253	103.995	106.906	112.768	97.5713	107.852	102.289	107.467	99.2707	103.582	101.249	107.524	118.274	120.385	105.856	112.887	105.964	112.12	98.8328	106.611	100.434	95.0633	98.6335	101.733	97.3617	93.7883	92.0059	138.74	98.4098	96.6528	112.21	100.271
60	99.215	114.667	105.685	103.607	100.76	112.945	92.9079	91.8149	101.522	101.126	115.9	110.025	103.85	120.351	109.568	108.738	92.1793	105.174	103.746	105.889	113.268	97.9747	107.089	102.405	107.234	98.848	104.099	101.478	107.104	117.176	119.949	106.412	113.09	106.538	112.543	99.0423	106.985	100.123	94.58	97.9322	102.022	97.1584	93.3166	92.0728	140.912	97.8565	95.3744	112.48	100.434
[truncated: 34 more columns]

## Sheet: all
t (min)		control spread			control round			y27 spread			y27 round
		V (%)	stdev		V (%)	stdev		V (%)	stdev		V (%)	stdev
0		100	4.85843e-15		100	4.55112e-15		100	4.59116e-15		100	4.99319e-15
1		99.4979	0.969466		99.7938	0.780888		99.9049	0.782057		99.9047	0.773908
2		99.0601	1.83948		99.7946	1.35166		99.8698	1.2906		99.8051	1.29186
3		98.7725	2.75834		99.7032	1.76333		99.796	1.68244		99.8743	1.70058
4		98.4449	3.54669		99.7788	2.123		99.8458	2.03807		99.8481	2.04551
5		99.1551	4.39146		100.83	2.81548		100.717	2.76888		100.563	2.78009
6		99.5354	4.53491		101.47	2.93588		101.119	3.11899		100.718	3.01439
7		99.9467	4.7013		101.877	3.00645		101.257	3.47532		100.741	3.1837
8		100.174	5.022		102.119	3.2941		101.331	3.84391		100.624	3.44171
9		100.405	5.20306		102.288	3.51718		101.396	4.08579		100.556	3.48497
10		100.595	5.47965		102.246	3.82109		101.411	4.3804		100.565	3.57982
11		100.614	5.69864		102.295	4.01689		101.336	4.64811		100.407	3.7574
12		100.665	5.82638		102.233	4.22115		101.264	4.90946		100.461	3.85891
13		100.725	5.8734		102.2	4.41714		101.12	5.11678		100.46	4.05061
14		100.694	6.02139		102.261	4.54606		101.022	5.28153		100.382	4.15257
15		100.739	6.11438		102.103	4.68332		100.829	5.44879		100.421	4.27401
16		100.669	6.17335		102.036	4.7907		100.69	5.54804		100.473	4.37645
17		100.605	6.27659		101.945	4.9128		100.542	5.71134		100.465	4.54325
18		100.622	6.3021		101.873	4.9287		100.385	5.8105		100.56	4.67276
19		100.553	6.31545		101.846	5.09392		100.251	5.89324		100.583	4.76281
20		100.595	6.31466		101.867	5.13852		100.112	6.03606		100.62	4.8834
21		100.579	6.37446		101.872	5.19086		99.9249	6.0973		100.667	4.95282
22		100.622	6.41068		101.892	5.27584		99.8387	6.24671		100.713	5.09832
23		100.5	6.40631		101.891	5.33017		99.6988	6.27487		100.85	5.16233
24		100.534	6.36217		101.964	5.37096		99.5117	6.37943		100.854	5.24088
25		100.54	6.41507		101.965	5.41211		99.4269	6.40849		100.949	5.28689
26		100.597	6.4777		101.985	5.53556		99.3458	6.46547		101.041	5.32826
27		100.594	6.46501		102.013	5.46206		99.1997	6.51232		101.098	5.3979
28		100.727	6.54071		102.172	5.59923		99.0739	6.58103		101.132	5.42489
29		100.751	6.59407		102.208	5.70216		99.009	6.61917		101.214	5.49121
30		100.741	6.507		102.318	5.65666		98.9432	6.64523		101.282	5.5127
31		100.823	6.42534		102.379	5.77508		98.8563	6.74046		101.355	5.59266
32		100.875	6.57988		102.445	5.73498		98.7269	6.77863		101.44	5.69521
33		100.881	6.51042		102.534	5.76182		98.6417	6.82882		101.496	5.67467
34		100.977	6.47924		102.606	5.80538		98.57	6.81274		101.603	5.75688
35		100.952	6.56238		102.686	5.81883		98.4794	6.89557		101.692	5.77783
36		100.941	6.47083		102.823	5.79307		98.4305	6.96654		101.802	5.78819
37		101.041	6.43331		102.958	5.87115		98.3085	7.01951		101.936	5.79597
38		100.981	6.40274		103.054	5.83962		98.2703	7.01324		101.981	5.85285
39		100.99	6.50783		103.209	5.92401		98.1864	7.07606		102.075	5.88519
40		101.062	6.49006		103.247	5.95098		98.1287	7.1428		102.231	5.98466
41		101.026	6.48184		103.342	6.00583		98.086	7.13908		102.315	5.95229
42		101.166	6.48867		103.473	5.9756		98.0105	7.16354		102.395	6.10452
43		101.133	6.5478		103.591	6.0205		98.0029	7.1808		102.625	6.25064
44		101.111	6.57618		103.699	6.08566		97.9679	7.24589		102.703	6.29953
45		101.007	6.61076		103.808	6.12919		97.9203	7.25518		102.888	6.46828
46		101.042	6.58175		103.946	6.08896		97.869	7.27945		102.986	6.63206
47		101.036	6.61652		104.136	6.19369		97.8461	7.33083		103.163	6.77792
48		101.057	6.60577		104.187	6.17973		97.8346	7.35814		103.372	6.98362
49		101.032	6.57515		104.388	6.21653		97.8321	7.37285		103.51	7.32945
50		101.073	6.61706		104.433	6.26258		97.7798	7.43738		103.704	7.43201
51		101.11	6.49476		104.54	6.29414		97.7944	7.45758		103.859	7.63405
52		101.074	6.45068		104.555	6.40968		97.7401	7.48713		104.02	7.90532
53		101.107	6.51077		104.813	6.32047		97.716	7.51388		104.231	8.12344
54		101.239	6.56093		104.979	6.41469		97.7122	7.51956		104.312	8.28428
55		101.213	6.48791		105.049	6.35437		97.6998	7.56728		104.49	8.40203
56		101.332	6.44734		105.185	6.43811		97.7366	7.49683		104.59	8.58231
57		101.29	6.51716		105.366	6.41481		97.6671	7.5134		104.656	8.66332
58		101.284	6.45453		105.417	6.43926		97.6605	7.61264		104.828	8.79866
59		101.356	6.43129		105.442	6.51702		97.6733	7.54705		104.953	8.87847
60		101.305	6.53863		105.602	6.56254		97.6484	7.59461		104.974	9.09171
