# Supplementary material for: A mechano-osmotic feedback couples cell volume to the rate of cell deformation
Source: eLife journal article supplement (doi:10.7554/elife.72381), 2022-04-13
Supplement: supp [file volume_area_FN_PEG.xlsx]

## Sheet: Sheet1
fibronectin	Average Spreading area (µm2)	stdev	n	t (min)	sterr		fibronectin	Average Volume (µm3)	stdev	n	t (min)	sterr			Volume on PLL-PEG	Average Volume (µm3)	stdev	n	t (min)	sterr
	30.7384	17.0021	125	0	1.52071			100	4.71827e-15	127	0	4.18678e-16				100	7.27264e-15	84	0	7.9351e-16
	49.4132	21.9435	91	1	2.3003			99.6009	0.829008	127	1	0.0735626				100.282	1.29504	84	1	0.141301														speed of V increase
	70.2702	37.4611	93	2	3.88454			99.3579	1.32909	127	2	0.117937				100.825	1.86494	84	2	0.203481															1.74505	22
	80.794	49.4268	83	3	5.42529			99.0472	1.86518	127	3	0.165508				101.223	2.45031	84	3	0.267351															4.75922	60
	98.3835	55.1492	82	4	6.09021			98.7091	2.32124	127	4	0.205977				101.573	2.85659	84	4	0.31168
	111.59	74.201	76	5	8.51143			98.3849	2.80316	127	5	0.24874				101.889	3.18792	84	5	0.34783
	135.333	87.5464	76	6	10.0423			98.0412	3.16113	127	6	0.280505				101.999	3.44466	84	6	0.375843															6.30845	50
	153.692	92.9948	71	7	11.0365			97.7285	3.40908	127	7	0.302507				102.386	3.67979	84	7	0.401498															7.57014	60
	179.769	107.3	65	8	13.309			97.4043	3.59397	127	8	0.318913				102.569	4.04117	84	8	0.440928
	192.514	117.658	69	9	14.1643			97.057	3.79351	127	9	0.33662				102.858	4.27726	84	9	0.466687
	209.968	122.097	72	10	14.3892			96.7402	3.95498	127	10	0.350948				103.084	4.49577	84	10	0.490529
	214.37	136.616	57	11	18.0952			96.478	4.13906	127	11	0.367282				103.228	4.70042	84	11	0.512857
	252.121	135.701	72	12	15.9925			96.2055	4.1724	127	12	0.37024				103.169	4.92215	84	12	0.537051
	247.42	137.9	60	13	17.8028			95.914	4.28644	127	13	0.38036				103.325	5.09744	84	13	0.556177
	283.898	143.766	61	14	18.4074			95.685	4.36773	127	14	0.387573				103.496	5.26063	84	14	0.573982
	263.813	142.309	61	15	18.2208			95.4485	4.38086	127	15	0.388738				103.481	5.3807	84	15	0.587083
	304.829	159.888	64	16	19.9861			95.2258	4.45595	127	16	0.395401				103.557	5.62378	84	16	0.613604
	290.363	158.402	51	17	22.1807			95.0515	4.51671	127	17	0.400793				103.799	6.04092	84	17	0.659118
	329.711	160.542	54	18	21.847			94.8421	4.58872	127	18	0.407183				103.856	5.95898	84	18	0.650178
	327.19	162.333	53	19	22.2981			94.7072	4.63729	127	19	0.411493				103.748	5.90126	84	19	0.64388
	351.97	166.285	56	20	22.2208			94.5803	4.73028	127	20	0.419744				103.903	6.08278	84	20	0.663685
	324.083	165.458	48	21	23.8817			94.5065	4.74019	127	21	0.420624				103.8	6.18758	84	21	0.67512
	364.024	171.683	56	22	22.9421			94.4123	4.85167	127	22	0.430517				103.987	6.24184	84	22	0.681041
	325.637	182.618	34	23	31.3187			94.2559	4.7846	127	23	0.424564				104.07	6.33001	84	23	0.690661
	364.78	174.233	72	24	20.5335			94.2293	4.87446	127	24	0.432538				104.155	6.42104	84	24	0.700592
	352.794	172.403	43	25	26.2912			94.1922	4.92803	127	25	0.437292				104.171	6.63689	84	25	0.724144
	377.072	174.867	51	26	24.4862			94.2143	4.96267	127	26	0.440366				104.249	6.72745	84	26	0.734025
	386.148	201.665	35	27	34.0876			94.1706	5.06378	127	27	0.449338				104.252	6.90209	84	27	0.75308
	408.994	194.14	54	28	26.4192		1.74505	94.1078	5.04852	127	28	0.447984				104.718	7.18821	84	28	0.784298
	363.144	148.892	50	29	21.0564		22	94.1712	5.10269	127	29	0.45279				104.581	6.81075	84	29	0.743114
	409.357	187.02	56	30	24.9916			94.2311	5.15032	127	30	0.457017				104.853	6.71945	84	30	0.733152
	346.939	180.671	28	31	34.1437			94.2603	5.13814	127	31	0.455936				104.759	6.57818	84	31	0.717738
	433.641	190.121	54	32	25.8722			94.2611	5.17119	127	32	0.458869				105.231	6.85159	84	32	0.74757
	384.591	179.429	30	33	32.759			94.3698	5.18171	127	33	0.459802				105.796	8.25021	84	33	0.900172
	439.72	177.048	68	34	21.4702			94.4497	5.16554	127	34	0.458367				105.64	7.7541	84	34	0.846042
	384.034	189.974	24	35	38.7782			94.5233	5.25855	127	35	0.466621				106.496	9.48256	84	35	1.03463
	446.155	206.3	53	36	28.3375			94.6032	5.31772	127	36	0.471872				106.431	8.92717	84	36	0.974034
	419.603	196.071	30	37	35.7974			94.649	5.33784	126	37	0.475532				106.04	7.30557	84	37	0.797103
	444.317	222.486	43	38	33.9288			94.7337	5.34494	126	38	0.476165				105.987	7.03624	84	38	0.767716
	438.563	157.85	55	39	21.2845			94.8078	5.41302	126	39	0.48223				105.855	7.34366	84	39	0.801259
	457.526	219.196	50	40	30.9989			94.8989	5.40177	126	40	0.481228				106.112	7.57694	84	40	0.826712
	425.927	179.779	24	41	36.6972			95.0159	5.48573	126	41	0.488708				106.067	7.29817	84	41	0.796296
	459.53	222.836	54	42	30.3241			95.1326	5.53461	126	42	0.493062				106.433	7.97019	84	42	0.869619
	421.671	205.008	28	43	38.743			95.1793	5.48422	126	43	0.488573				106.387	7.95969	84	43	0.868473
	459.649	204.681	74	44	23.7937			95.2965	5.51401	126	44	0.491227				106.395	7.43492	84	44	0.811216
	445.757	170.378	33	45	29.659			95.4025	5.53931	126	45	0.493481				106.431	8.04563	84	45	0.87785
	458.806	228.35	48	46	32.9595			95.421	5.49444	126	46	0.489483				106.387	8.00744	84	46	0.873684
	463.132	175.983	26	47	34.5131			95.5486	5.5283	126	47	0.4925				106.28	7.56184	84	47	0.825064
	500.305	240.431	36	48	40.0718			95.6722	5.56224	126	48	0.495524				106.172	7.3039	84	48	0.79692
	437.176	208.953	22	49	44.5489			95.7767	5.56956	125	49	0.498157				106.421	7.58475	84	49	0.827564
	433.161	191.205	107	50	18.4844			95.8529	5.62535	123	50	0.507221				106.308	7.2844	84	50	0.794794
	479.115	235.133	15	51	60.7111
	506.089	251.795	38	52	40.8465
	483.447	224.673	16	53	56.1682
	532.765	249.696	37	54	41.0498
	495.174	241.42	18	55	56.9033
	533.485	268.727	32	56	47.5046
	508.928	289.837	20	57	64.8094
	551.151	267.102	29	58	49.5997
	520.517	195.268	12	59	56.3691
	550.205	277.935	27	60	53.4887
