# Supplementary material for: A mechano-osmotic feedback couples cell volume to the rate of cell deformation
Source: eLife journal article supplement (doi:10.7554/elife.72381), 2022-04-13
Supplement: supp [file volume_area_HeLa_hgem-mCherry_cell_cycle.xlsx]

## Sheet: Sheet1
Mitosis + 1h	spreading_area_1hour (µm2)	volume_1hour (µm3)		Mitosis + 4h	spreading_area_4hour (µm2)	volume_4hour (µm3)		Mitosis + 6h	spreading_area_6hour (µm2)	volume_6hour (µm3)		G1/S	spreading area (µm2)	volume (µm3)		G1/S + 4h	spreading area (µm2)	volume (µm3)			correlation coefficient	A median (µm2)	Vmedian (µm3)	Astdev (µm2)	Vstdev (µm3)
1	219.934	1394.56		1	471.857	1504.91		1	533.839	1600.67		1	581.824	1697.11		1	645.805	1839.24		Mitosis + 1h	0.10768	159.952	1611.81	51.2067	220.307
2	243.926	1248.26		2	411.876	1266.75		2	499.849	1402.11		2	445.865	1426.26		2	489.852	1500.16		Mitosis + 4h	0.22701	281.915	1550.02	86.0335	212.836
3	213.935	1158.74		3	357.892	1259.06		3	401.879	1190.98		3	489.852	1295.95		3	475.856	1431.27		Mitosis + 6h	0.2628	301.909	1623.63	91.2494	230.194
4	273.917	1422.04		4	609.816	1472.82		4	667.798	1550.79		4	691.791	1593.34		4	717.783	1851.47		G1/S	0.201586	325.902	1753.21	88.752	267.829
5	377.886	1391.07		5	469.858	1388.44		5	533.839	1413.27		5	397.88	1602.92		5	435.868	1820.97		G1/S + 4h	0.21897	365.889	1946.54	96.1983	315.904
6	371.888	1419.92		6	453.863	1453.32		6	507.847	1460.4		6	287.913	1490.36		6	297.91	1536.15
7	199.94	1411.21		7	329.9	1482.33		7	371.888	1589.93		7	365.889	1440.08		7	431.87	1417.9
8	165.95	1366.6		8	259.921	1440.2		8	291.912	1477.25		8	351.894	1591.37		8	393.881	1728.09
9	147.955	1350.7		9	307.907	1350.35		9	355.892	1369.04		9	361.891	1402.56		9	397.88	1687.84
10	225.932	1331.11		10	303.908	1457.15		10	329.9	1494.43		10	347.895	1751.09		10	411.876	1591.71
11	209.937	1396.01		11	325.902	1452.65		11	343.896	1510.02		11	325.902	1703.19		11	373.887	1868.79
12	207.937	1233.05		12	285.914	1249.02		12	343.896	1298.54		12	325.902	1607.14		12	361.891	1822.46
13	151.954	1443.25		13	239.928	1492.99		13	265.92	1589.54		13	369.888	1588.81		13	331.9	1736.09
14	159.952	1503.34		14	269.918	1545.96		14	281.915	1636.17		14	243.926	1121.03		14	379.885	1743.8
15	159.952	1441.52		15	263.92	1427.4		15	317.904	1474.03		15	189.943	1128.72		15	255.923	1187.82
16	183.944	1556.02		16	293.911	1568.6		16	351.894	1473.57		16	161.951	1786.66		16	203.938	1260.02
17	147.955	1373.44		17	235.929	1342.95		17	289.912	1315.94		17	219.934	1513.26		17	199.94	1786.87
18	129.961	1433.36		18	253.923	1438.01		18	243.926	1474.44		18	288.369	2275.9		18	310.986	2519.65
19	127.961	840.633		19	283.914	968.166		19	243.926	1012.49		19	225.932	1573.34		19	353.893	1872.86
20	85.974	1066.2		20	189.943	894.595		20	187.943	963.133		20	319.903	1762.13		20	469.858	2340.27
21	71.4652	1693.5		21	95.971	1489.77		21	121.963	1574.9		21	387.883	1903.25		21	549.834	1981.97
22	109.967	1550.18		22	173.947	1470.36		22	179.946	1558.95		22	399.879	1906.99		22	369.888	2268.45
23	150.547	1459.96		23	172.456	2031.33		23	206.382	2108.03		23	331.9	2038.08		23	437.868	2019.31
24	93.9716	1462.13		24	157.952	1497.08		24	211.936	1543.22		24	301.909	1749.1		24	245.926	1619.12
25	121.963	1647.72		25	295.911	1625.97		25	357.892	1697.23		25	289.912	1670.6		25	347.895	1822.54
26	251.924	1502.72		26	423.872	1644.26		26	439.867	1744.4		26	279.915	1547.24		26	241.927	1555.6
27	125.962	1417.71		27	235.929	1320.75		27	247.925	1374.38		27	299.909	1789.44		27	243.926	1821.71
28	351.894	1537.54		28	431.87	1649.11		28	445.865	1713.14		28	245.926	1585.8		28	377.886	1977.25
29	191.942	1668.14		29	305.908	1792.81		29	297.91	1842.52		29	299.909	1544.48		29	333.899	2075.99
30	213.935	1789.7		30	325.902	1803.8		30	479.855	1822.56		30	327.901	1810.97		30	345.896	2029.32
31	191.942	1784.66		31	281.915	1832.63		31	321.903	1916.94		31	279.915	1572.15		31	333.899	2071.76
32	159.952	1688.66		32	293.911	1718.04		32	341.897	1804.8		32	313.905	1891.68		32	425.871	1821.92
33	171.948	1440.27		33	219.934	1524.59		33	225.932	1540.27		33	359.891	1887.82		33	343.896	1726.8
34	167.949	1409.33		34	237.928	1426.8		34	241.927	1463.78		34	341.897	1925.11		34	285.914	1885.64
35	149.955	1624.78		35	247.925	1701.54		35	273.917	1823.2		35	371.888	1705.47		35	327.901	2029.82
36	175.947	1342.41		36	217.934	1410.59		36	211.936	1390.89		36	265.92	1376		36	339.897	1968.32
37	115.965	1423.14		37	191.942	1370.04		37	265.92	1380.42		37	265.92	1849.48		37	367.889	1904.43
38	183.944	1722.25		38	297.91	1687.22		38	295.911	1766.19		38	321.903	1682.54		38	313.905	2766.81
39	171.948	1659.72		39	251.924	1516.74		39	269.918	1587.88		39	333.899	1814.18		39	289.912	2534.33
40	123.963	1549.79		40	225.932	1510.11		40	267.919	1495.84		40	213.935	1625.49		40	534.035	2573.67
41	173.947	1777.03		41	303.908	1757.19		41	309.906	1833.8		41	347.895	1806.66		41	487.78	2010.57
42	145.956	1557.5		42	229.931	1438.74		42	249.924	1547.89		42	301.909	1589.38		42	477.856	2353.3
43	143.957	1681.46		43	263.92	1560.27		43	261.921	1616.58		43	269.918	2603.94		43	385.883	2316.21
44	151.954	1816.21		44	289.912	1634.62		44	303.908	1745.29		44	277.916	2234.27		44	403.878	1973.95
45	143.957	1819.45		45	279.915	1575.06		45	315.905	1785.7		45	550.855	2383.51		45	461.86	2313.61
46	201.939	1719.1		46	329.9	1538.74		46	357.892	1508.09		46	464.652	1810.69		46	291.912	2372.72
47	217.934	1611.05		47	307.907	1441.56		47	325.902	1413.93		47	437.868	2115.66		47	445.865	1715.92
48	169.949	1737.12		48	275.917	1569.89		48	313.905	1602.37		48	363.89	2098.07		48	417.874	2363.79
49	127.961	1547.51		49	267.919	1480.55		49	311.906	1456.57		49	411.876	1942.61		49	359.891	1804.99
50	157.952	1704.74		50	253.923	1710.1		50	247.925	1772.59		50	449.864	2061.76		50	305.908	2269.46
51	153.953	1489.39		51	237.928	1604.96		51	207.937	1584.16		51	261.921	2300.09		51	277.916	1884.7
52	189.943	1767.55		52	245.926	1642.05		52	255.923	1713.81		52	311.906	1631.61		52	325.902	1902.24
53	167.949	1739.89		53	307.907	1704.05		53	317.904	1794.98		53	453.863	1514.42		53	433.869	1853.72
54	111.966	1666.2		54	245.926	1489.54		54	215.935	1575.96		54	349.894	2220.56		54	379.885	1879.88
55	129.961	1616.95		55	313.905	1431.44		55	303.908	1627.91		55	299.909	1927.19		55	509.882	1818.35
56	159.952	2184.93		56	247.925	2281.13		56	253.923	2403.29		56	253.923	2079.98		56	469.891	2584.25
57	133.96	1791.9		57	211.936	1704.1		57	249.924	1656.08		57	321.903	1714.08		57	343.896	2567.89
58	109.967	1702.68		58	283.914	1333.14		58	249.924	1664.19		58	271.918	1577.45		58	335.899	1825.51
59	157.952	1963.03		59	261.921	1989.52		59	275.917	2065.35		59	289.912	1747.88		59	385.883	1461.31
60	135.959	1607.27		60	277.916	1540.32		60	281.915	1469.58		60	337.898	1651.3		60	363.89	1872.04
61	153.953	1869.68		61	259.921	1808.37		61	261.921	1795.43		61	289.912	1752.88		61	311.906	2006.89
62	220.762	1909.49		62	706.44	1934.32		62	664.39	2190.37		62	491.886	1783.94		62	321.903	1488.39
63	262.812	1623.29		63	548.753	1456.2		63	559.265	1694.52		63	483.888	2365.04		63	341.897	1678.72
64	187.123	1809.81		64	498.293	1874.95		64	393.168	2020.2		64	315.905	2331.27		64	297.91	2019.74
65	189.943	1953.71		65	347.895	1969.33		65	401.879	2028.49		65	289.912	1652.43		65	223.932	1588.14
66	169.949	1763.89		66	315.905	1668.22		66	353.893	1733.23		66	343.896	1557.63		66	373.887	1694.54
67	161.951	1694.02		67	345.896	1594.09		67	321.903	1615.13		67	327.901	1732.84		67	293.911	2020.12
68	165.95	1867.96		68	331.9	1797.48		68	353.893	1924.55		68	339.897	1738.57		68	305.908	1587.81
69	155.953	1620.29		69	307.907	1519.72		69	329.9	1545.29		69	319.903	1432.6		69	293.911	2182.43
70	129.961	1581.05		70	273.917	1508.61		70	287.913	1499.88		70	321.903	1579.15		70	451.863	2099.9
71	153.953	1893.58		71	337.898	1888.91		71	401.879	2010.51		71	279.915	1753.21		71	477.856	2337.68
72	125.962	1596.49		72	229.931	1503.81		72	241.927	1506.21		72	249.924	1576.17		72	515.844	2291.14
73	169.949	1510.7		73	261.921	1401.48		73	265.92	1308.3		73	349.894	1663.2		73	459.861	2359.44
74	155.953	2026.81		74	371.888	1954.52		74	443.866	2062.86		74	321.903	1741.78		74	567.828	2082.28
75	115.965	1436.69		75	237.928	1504		75	217.934	1483.35		75	269.918	1563.67		75	461.86	2208.09
76	157.952	1617.91		76	267.919	1518.99		76	301.909	1508.19		76	307.907	1928.46		76	397.88	2610.81
77	207.937	2053.67		77	397.88	1694.94		77	405.877	1804.41		77	347.895	1874.02		77	433.869	2136.86
78	173.947	1818.32		78	325.902	1415.2		78	353.893	1580.54		78	457.862	2013.49		78	311.906	2250.73
79	119.964	1574.21		79	237.928	1649.02		79	257.922	1744		79	437.868	2165.02		79	235.929	2110.25
80	187.943	1801.87		80	267.919	1712.94		80	277.916	1673.77		80	365.889	2022.85		80	333.899	1773.99
81	253.923	1443.12		81	247.925	1491.56		81	291.912	1376.09		81	489.852	1999.53		81	273.917	2075.97
82	125.962	1507.4		82	199.94	1561.9		82	247.925	1558.83		82	383.884	1903.04		82	269.918	1924.75
83	181.945	1431.57		83	241.927	1533.87		83	319.903	1537.51		83	357.892	2309.62		83	377.886	2126.97
84	199.94	1589.37		84	305.908	1610		84	343.896	1679.93		84	371.888	1929.1		84	333.899	1971.91
85	203.938	1656.63		85	341.897	1829.73		85	321.903	1733.79		85	241.927	2045.28		85	313.905	1867.09
86	237.945	2349.52		86	447.896	2190.79		86	501.884	2259.79		86	191.942	1924.37		86	325.902	2077.39
87	287.933	2286.7		87	387.91	2252.02		87	439.898	2249.11		87	279.915	1582.76		87	383.884	2182.99
88	141.957	1418.92		88	269.918	1390.68		88	281.915	1482.63		88	203.938	1872.6		88	341.897	2099.82
89	183.944	1486.07		89	253.923	1450.98		89	303.908	1468.41		89	243.926	1822.31		89	367.889	1704.82
90	227.931	1650.43		90	287.913	1654.58		90	339.897	1681.16		90	331.9	1936.09		90	445.865	1865.47
91	155.953	1376.72		91	261.921	1400.05		91	295.911	1552.52		91	303.908	1780.36		91	497.85	2285.67
92	191.942	1551.57		92	293.911	1419.08		92	299.909	1449.82		92	273.917	1673.89		92	645.805	2395.27
93	153.953	1545.03		93	295.911	1541.15		93	309.906	1623.63		93	377.886	1940.11
94	129.961	1466.34		94	273.917	1473.2		94	269.918	1651.13		94	391.882	1953.62
95	125.962	1534.48		95	253.923	1409.2		95	251.924	1508.61		95	299.909	1787.9
96	217.934	1788.48		96	241.927	1521.85		96	291.912	1547.89		96	349.894	1601.59
97	157.952	1398.83		97	295.911	1382.92		97	273.917	1477.87		97	405.877	1677.65
98	175.947	1598.77		98	285.914	1442.63		98	277.916	1405.2		98	453.863	2005.55
99	133.96	1784.35		99	245.926	1854.09		99	265.92	1860.39		99	581.824	2171.53
100	141.957	1814.76		100	303.908	1827.03		100	301.909	1765
101	121.963	1676.26		101	233.929	1618.63		101	253.923	1603.82
102	145.956	1863.51		102	301.909	1874.21		102	355.892	2000.51
103	253.923	1841.72		103	383.884	1843.81		103	407.877	1838
104	175.947	1425.12		104	253.923	1471.53		104	321.903	1465.11
105	269.918	1771.82		105	321.903	1855.49		105	387.883	1953.4
106	217.934	1817.49		106	327.901	1834.71		106	367.889	1871.48
107	291.912	1941.08		107	427.871	1862.27		107	501.848	1847.2
108	253.923	1769.11		108	307.907	1925.61		108	321.903	2028.65
109	179.946	1916.97		109	319.903	1747.34		109	351.894	1799.02
110	173.947	2054.44		110	311.906	1872.78		110	353.893	1936.57
111	167.949	1710.88		111	213.935	1809.26		111	223.932	1841.82
112	109.967	1443.03		112	171.948	1453.79		112	183.944	1561.68
113	151.954	1648.75		113	177.946	1586.11		113	181.945	1789.63
114	139.958	1745.9		114	135.959	1705.53		114	187.943	1871.78
115	129.961	1645.62		115	147.955	1712		115	167.949	1763.64
116	159.952	1659.42		116	213.935	1569.05		116	225.932	1630.94
117	151.954	1602.02		117	257.922	1553.27		117	307.907	1644.28
118	161.951	1319.66		118	149.955	1330.09		118	231.93	1309.02
119	149.955	1449		119	281.915	1415.68		119	303.908	1468.13
120	133.96	1606.33		120	227.931	1645.35		120	235.929	1749.99
121	139.958	1534.81		121	221.933	1539.61		121	225.932	1634.65
122	143.957	1802.07		122	341.897	1716.45		122	347.895	1867.52
123	125.962	1679.33		123	251.924	1589.68		123	277.916	1661.79
124	141.957	1754.06		124	287.913	1613.38		124	269.918	1659.11
125	143.957	1611.81		125	295.911	1550.02		125	367.889	1708.25
126	175.947	1465.39		126	247.925	1447.91		126	261.921	1520.38
127	227.931	1545.52		127	315.905	1572.76		127	313.905	1631.31
128	183.944	1750.34		128	389.882	1698.23		128	403.878	1821.37
129	153.953	1642.39		129	357.892	1622.62		129	363.89	1779.22
130	147.955	1562.73		130	297.91	1527.2		130	289.912	1469.58
131	155.953	1569.68		131	301.909	1433.48		131	345.896	1489.54
