# Supplementary material for: A mechano-osmotic feedback couples cell volume to the rate of cell deformation
Source: eLife journal article supplement (doi:10.7554/elife.72381), 2022-04-13
Supplement: supp [file volume_patterns_hela.xlsx]

## Sheet: Sheet1
experiment	lineage	Volume (µm3)	Pattern Area (µm2)		experiment	lineage	Volume (µm3)	Pattern Area (µm2)		experiment	lineage	Volume (µm3)	Pattern Area (µm2)		experiment	lineage	Volume (µm3)	Pattern Area (µm2)			dimensions	Pattern Area (µm2)	Average Volume (µm3)	stdev (µm3)	n	p-value compare with non-patterned				non-patterned cells, Volume		V (µm3)	A (µm2)		2606.51	703.15	965.796	397.472	286
04072017_Apo_HeLa_Pattern1_w11 GFP.TIF	1	2928.24	650		04072017_LD_HeLa_Pattern120_w11 GFP.TIF	1	3870.7	706.5		04072017_LD_HeLa_Pattern171_w11 GFP.TIF	1	1580.44	280		04072017_Apo_HeLa_Pattern55_w11 GFP.TIF	1	4272.71	314			50 X 13 µm	650	2723.38	796.678	131	0.151973						3290.11	981.195
04072017_Apo_HeLa_Pattern12_w11 GFP.TIF	1	2406.96	650		04072017_LD_HeLa_Pattern121_w11 GFP.TIF	1	2191.19	706.5		04072017_LD_HeLa_Pattern172_w11 GFP.TIF	1	3771.7	280		04072017_Apo_HeLa_Pattern55_w11 GFP.TIF	2	1864.26	314			r = 15 µm	706.5	2636.7	879.084	338	0.634184						1959.34	839.954
04072017_Apo_HeLa_Pattern13_w11 GFP.TIF	1	5231.51	650		04072017_LD_HeLa_Pattern122_w11 GFP.TIF	1	5001.22	706.5		04072017_LD_HeLa_Pattern173_w11 GFP.TIF	1	2862.82	280		04072017_Apo_HeLa_Pattern55_w11 GFP.TIF	3	2256.1	314			40 X 7 µm	280	2610.15	728.521	214	0.95532						1910.6	735.948
04072017_Apo_HeLa_Pattern15_w11 GFP.TIF	1	2808.29	650		04072017_LD_HeLa_Pattern122_w11 GFP.TIF	2	3246.76	706.5		04072017_LD_HeLa_Pattern173_w11 GFP.TIF	2	2846.72	280		04072017_Apo_HeLa_Pattern56_w11 GFP.TIF	1	3358.03	314			r = 10 µm	314	2603.46	917.377	242	0.966364						1560.51	649.207
04072017_Apo_HeLa_Pattern15_w11 GFP.TIF	2	1876.42	650		04072017_LD_HeLa_Pattern123_w11 GFP.TIF	1	3258.67	706.5		04072017_LD_HeLa_Pattern173_w11 GFP.TIF	3	2124.44	280		04072017_Apo_HeLa_Pattern56_w11 GFP.TIF	2	2985.04	314														3078.87	1434.04
04072017_Apo_HeLa_Pattern16_w11 GFP.TIF	1	1979.23	650		04072017_LD_HeLa_Pattern124_w11 GFP.TIF	1	1593.89	706.5		04072017_LD_HeLa_Pattern174_w11 GFP.TIF	1	2559.29	280		04072017_Apo_HeLa_Pattern56_w11 GFP.TIF	3	2369.28	314														2163.86	955.401
04072017_Apo_HeLa_Pattern16_w11 GFP.TIF	2	1309.23	650		04072017_LD_HeLa_Pattern125_w11 GFP.TIF	1	3612.5	706.5		04072017_LD_HeLa_Pattern175_w11 GFP.TIF	1	3114.88	280		04072017_Apo_HeLa_Pattern57-1_w11 GFP.tif	1	2196.66	314														2496.92	1151.97
04072017_Apo_HeLa_Pattern16_w11 GFP.TIF	3	2130.63	650		04072017_LD_HeLa_Pattern126_w11 GFP.TIF	1	1956.21	706.5		04072017_LD_HeLa_Pattern176_w11 GFP.TIF	1	1960.28	280		04072017_Apo_HeLa_Pattern57-1_w11 GFP.tif	2	2964.84	314														3192.24	1046.93
04072017_Apo_HeLa_Pattern16_w11 GFP.TIF	4	2272.03	650		04072017_LD_HeLa_Pattern127_w11 GFP.TIF	1	1652.07	706.5		04072017_LD_HeLa_Pattern176_w11 GFP.TIF	2	3110.81	280		04072017_Apo_HeLa_Pattern57-1_w11 GFP.tif	3	2925.17	314														2472.1	1100.59
04072017_Apo_HeLa_Pattern16_w11 GFP.TIF	5	2106.89	650		04072017_LD_HeLa_Pattern128_w11 GFP.TIF	1	4306.87	706.5		04072017_LD_HeLa_Pattern177_w11 GFP.TIF	1	2213.47	280		04072017_Apo_HeLa_Pattern58_w11 GFP.TIF	1	2170.54	314														2602.4	1078.13
04072017_Apo_HeLa_Pattern17_w11 GFP.TIF	1	2264.27	650		04072017_LD_HeLa_Pattern129_w11 GFP.TIF	1	2654.89	706.5		04072017_LD_HeLa_Pattern177_w11 GFP.TIF	2	3144.58	280		04072017_Apo_HeLa_Pattern58_w11 GFP.TIF	2	2447.82	314														3086.62	1741.79
04072017_Apo_HeLa_Pattern17_w11 GFP.TIF	2	1786.57	650		04072017_LD_HeLa_Pattern130_w11 GFP.TIF	1	2660.07	706.5		04072017_LD_HeLa_Pattern177_w11 GFP.TIF	3	3247.21	280		04072017_Apo_HeLa_Pattern58_w11 GFP.TIF	3	4414.39	314														1398.36	536.36
04072017_Apo_HeLa_Pattern17_w11 GFP.TIF	3	2140.16	650		04072017_LD_HeLa_Pattern131_w11 GFP.TIF	1	1896.39	706.5		04072017_LD_HeLa_Pattern177_w11 GFP.TIF	4	3527.38	280		04072017_Apo_HeLa_Pattern58_w11 GFP.TIF	4	3204.8	314														2734.74	1436.33
04072017_Apo_HeLa_Pattern17_w11 GFP.TIF	4	2238.43	650		04072017_LD_HeLa_Pattern131_w11 GFP.TIF	2	1753.69	706.5		04072017_LD_HeLa_Pattern178_w11 GFP.TIF	1	2749.74	280		04072017_Apo_HeLa_Pattern58_w11 GFP.TIF	5	2029.91	314														4671.17	1676.58
04072017_Apo_HeLa_Pattern17_w11 GFP.TIF	5	2193.68	650		04072017_LD_HeLa_Pattern131_w11 GFP.TIF	3	5419.74	706.5		04072017_LD_HeLa_Pattern179_w11 GFP.TIF	1	2281.06	280		04072017_Apo_HeLa_Pattern58_w11 GFP.TIF	6	2234.79	314														3069.57	1551.67
04072017_Apo_HeLa_Pattern18_w11 GFP.TIF	1	2763.21	650		04072017_LD_HeLa_Pattern132-1_w11 GFP.tif	1	2868.48	706.5		04072017_LD_HeLa_Pattern179_w11 GFP.TIF	2	1999.02	280		04072017_Apo_HeLa_Pattern58_w11 GFP.TIF	7	2151.94	314														3006.15	175.147
04072017_Apo_HeLa_Pattern18_w11 GFP.TIF	2	2758.56	650		04072017_LD_HeLa_Pattern133_w11 GFP.TIF	1	3489.67	706.5		04072017_LD_HeLa_Pattern179_w11 GFP.TIF	3	2332.19	280		04072017_Apo_HeLa_Pattern59_w11 GFP.TIF	1	1980.19	314														2218.73	155.593
04072017_Apo_HeLa_Pattern20_w11 GFP.TIF	1	2458.41	650		04072017_LD_HeLa_Pattern134_w11 GFP.TIF	1	3061.13	706.5		04072017_LD_HeLa_Pattern179_w11 GFP.TIF	4	3249.79	280		04072017_Apo_HeLa_Pattern59_w11 GFP.TIF	2	3428.16	314														4070.2	1670.96
04072017_Apo_HeLa_Pattern20_w11 GFP.TIF	2	1512.77	650		04072017_LD_HeLa_Pattern135_w11 GFP.TIF	1	2516.05	706.5		04072017_LD_HeLa_Pattern180_w11 GFP.TIF	1	2717.8	280		04072017_Apo_HeLa_Pattern60_w11 GFP.TIF	1	1645.66	314														2597.88	939.592
04072017_Apo_HeLa_Pattern21_w11 GFP.TIF	1	2194.48	650		04072017_LD_HeLa_Pattern135_w11 GFP.TIF	2	2207.26	706.5		04072017_LD_HeLa_Pattern180_w11 GFP.TIF	2	3674.28	280		04072017_Apo_HeLa_Pattern60_w11 GFP.TIF	2	2219.63	314														2895.98	1097.68
04072017_Apo_HeLa_Pattern25_w11 GFP.TIF	1	1440.01	650		04072017_LD_HeLa_Pattern136_w11 GFP.TIF	1	3023.22	706.5		04072017_LD_HeLa_Pattern180_w11 GFP.TIF	3	3164.33	280		04072017_Apo_HeLa_Pattern60_w11 GFP.TIF	3	2788.32	314														2329.96	689.769
04072017_Apo_HeLa_Pattern25_w11 GFP.TIF	2	2625.15	650		04072017_LD_HeLa_Pattern136_w11 GFP.TIF	2	5636.33	706.5		04072017_LD_HeLa_Pattern180_w11 GFP.TIF	4	2316.69	280		04072017_Apo_HeLa_Pattern60_w11 GFP.TIF	4	1733.71	314														3253.1	1253.38
04072017_Apo_HeLa_Pattern26_w11 GFP.TIF	1	4544.75	650		04072017_LD_HeLa_Pattern136_w11 GFP.TIF	3	2842.32	706.5		04072017_LD_HeLa_Pattern180_w11 GFP.TIF	5	2790.5	280		04072017_Apo_HeLa_Pattern60_w11 GFP.TIF	5	1970.55	314														987.904	1150.31
04072017_Apo_HeLa_Pattern26_w11 GFP.TIF	2	4601.15	650		04072017_LD_HeLa_Pattern136_w11 GFP.TIF	4	2430	706.5		04072017_LD_HeLa_Pattern181_w11 GFP.TIF	1	2787.94	280		04072017_Apo_HeLa_Pattern61_w11 GFP.TIF	1	2063.07	314														1427.85	824.146
04072017_Apo_HeLa_Pattern27_w11 GFP.TIF	1	2469.96	650		04072017_LD_HeLa_Pattern137_w11 GFP.TIF	1	1587.04	706.5		04072017_LD_HeLa_Pattern182_w11 GFP.TIF	1	1820.02	280		04072017_Apo_HeLa_Pattern61_w11 GFP.TIF	2	1420.07	314														1463.41	1668.16
04072017_Apo_HeLa_Pattern27_w11 GFP.TIF	2	2159.35	650		04072017_LD_HeLa_Pattern138_w11 GFP.TIF	1	2253.82	706.5		04072017_LD_HeLa_Pattern182_w11 GFP.TIF	2	2066.85	280		04072017_Apo_HeLa_Pattern61_w11 GFP.TIF	3	1783.42	314														3956.99	2040.5
04072017_Apo_HeLa_Pattern28_w11 GFP.TIF	1	2306.52	650		04072017_LD_HeLa_Pattern138_w11 GFP.TIF	2	2748.1	706.5		04072017_LD_HeLa_Pattern183_w11 GFP-1.tif	1	2478.12	280		04072017_Apo_HeLa_Pattern61_w11 GFP.TIF	4	2231.81	314														2185.57	906.31
04072017_Apo_HeLa_Pattern28_w11 GFP.TIF	2	1980.7	650		04072017_LD_HeLa_Pattern138_w11 GFP.TIF	3	2230.42	706.5		04072017_LD_HeLa_Pattern183_w11 GFP-1.tif	2	2941.19	280		04072017_Apo_HeLa_Pattern62_w11 GFP.TIF	1	2125.42	314														2486.31	1428.63
04072017_Apo_HeLa_Pattern28_w11 GFP.TIF	3	2370.87	650		04072017_LD_HeLa_Pattern139_w11 GFP.TIF	1	2785.57	706.5		04072017_LD_HeLa_Pattern183_w11 GFP-1.tif	3	2731.17	280		04072017_Apo_HeLa_Pattern62_w11 GFP.TIF	2	3282.54	314														2669.47	1076.36
04072017_Apo_HeLa_Pattern29_w11 GFP.TIF	1	2753.69	650		04072017_LD_HeLa_Pattern140_w11 GFP.TIF	1	2131.19	706.5		04072017_LD_HeLa_Pattern183_w11 GFP-2.tif	1	3727.83	280		04072017_Apo_HeLa_Pattern62_w11 GFP.TIF	3	3228.18	314														2259.11	494.238
04072017_Apo_HeLa_Pattern29_w11 GFP.TIF	2	2475.7	650		04072017_LD_HeLa_Pattern140_w11 GFP.TIF	2	2755.78	706.5		04072017_LD_HeLa_Pattern184-1_w11 GFP.tif	1	2804.21	280		04072017_Apo_HeLa_Pattern63_w11 GFP.TIF	1	1974.34	314														2146.13	713.275
04072017_Apo_HeLa_Pattern29_w11 GFP.TIF	3	1989.61	650		04072017_LD_HeLa_Pattern141_w11 GFP.TIF	1	6321.01	706.5		04072017_LD_HeLa_Pattern185_w11 GFP.TIF	1	2864.71	280		04072017_Apo_HeLa_Pattern63_w11 GFP.TIF	2	1775.52	314														1802.09	595.436
04072017_Apo_HeLa_Pattern3_w11 GFP.TIF	1	3364.48	650		04072017_LD_HeLa_Pattern141_w11 GFP.TIF	2	3169.09	706.5		04072017_LD_HeLa_Pattern185_w11 GFP.TIF	2	2046.59	280		04072017_Apo_HeLa_Pattern63_w11 GFP.TIF	3	3665.05	314														2225.15	685.297
04072017_Apo_HeLa_Pattern30_w11 GFP.TIF	1	3228.77	650		04072017_LD_HeLa_Pattern142-1_w11 GFP.tif	1	2182.35	706.5		04072017_LD_HeLa_Pattern186_w11 GFP.TIF	1	2704.24	280		04072017_Apo_HeLa_Pattern63_w11 GFP.TIF	4	3072.57	314														2068.38	824.874
04072017_Apo_HeLa_Pattern30_w11 GFP.TIF	2	2735.55	650		04072017_LD_HeLa_Pattern143_w11 GFP.TIF	1	2010.39	706.5		04072017_LD_HeLa_Pattern187_w11 GFP.TIF	1	3289.13	280		04072017_Apo_HeLa_Pattern63_w11 GFP.TIF	5	2225.62	314														1285.15	799.912
04072017_Apo_HeLa_Pattern32_w11 GFP.TIF	1	2316.31	650		04072017_LD_HeLa_Pattern145_w11 GFP.TIF	1	2526.73	706.5		04072017_LD_HeLa_Pattern188_w11 GFP.TIF	1	2683.59	280		04072017_Apo_HeLa_Pattern63_w11 GFP.TIF	6	3302.86	314														1992.24	644.527
04072017_Apo_HeLa_Pattern32_w11 GFP.TIF	2	2063.85	650		04072017_LD_HeLa_Pattern146_w11 GFP.TIF	1	3162.79	706.5		04072017_LD_HeLa_Pattern188_w11 GFP.TIF	2	2961.79	280		04072017_Apo_HeLa_Pattern63_w11 GFP.TIF	7	2974.09	314														2536.82	1959.37
04072017_Apo_HeLa_Pattern32_w11 GFP.TIF	3	2381.95	650		04072017_LD_HeLa_Pattern147_w11 GFP.TIF	1	2223.28	706.5		04072017_LD_HeLa_Pattern189_w11 GFP.TIF	1	2571.14	280		04072017_Apo_HeLa_Pattern63_w11 GFP.TIF	8	3277.01	314														2432.86	826.85
04072017_Apo_HeLa_Pattern33_w11 GFP.TIF	1	1950.45	650		04072017_LD_HeLa_Pattern148_w11 GFP.TIF	1	2696.05	706.5		04072017_LD_HeLa_Pattern191_w11 GFP.TIF	1	3383.36	280		04072017_Apo_HeLa_Pattern63_w11 GFP.TIF	9	3487.8	314														2139.17	689.353
04072017_Apo_HeLa_Pattern33_w11 GFP.TIF	2	1988.87	650		04072017_LD_HeLa_Pattern149_w11 GFP.TIF	1	3019.71	706.5		04072017_LD_HeLa_Pattern194_w11 GFP.TIF	1	2327.44	280		04072017_Apo_HeLa_Pattern63_w11 GFP.TIF	10	2181.24	314														1953.02	847.755
04072017_Apo_HeLa_Pattern33_w11 GFP.TIF	3	2210.67	650		04072017_LD_HeLa_Pattern149_w11 GFP.TIF	2	2175.03	706.5		04072017_LD_HeLa_Pattern196_w11 GFP.TIF	1	2134.96	280		04072017_Apo_HeLa_Pattern64_w11 GFP.TIF	1	2356.12	314														4655.1	1993.8
04072017_Apo_HeLa_Pattern34_w11 GFP.TIF	1	1640.69	650		04072017_LD_HeLa_Pattern150_w11 GFP.TIF	1	5583.77	706.5		20170614_LD_HeLa_Pattern100_w11 GFP.TIF	1	2833.89	280		04072017_Apo_HeLa_Pattern64_w11 GFP.TIF	2	3223.24	314														3021.33	1479.18
04072017_Apo_HeLa_Pattern34_w11 GFP.TIF	2	1845.76	650		04072017_LD_HeLa_Pattern150_w11 GFP.TIF	2	3376.96	706.5		20170614_LD_HeLa_Pattern100_w11 GFP.TIF	2	3331.81	280		04072017_Apo_HeLa_Pattern64_w11 GFP.TIF	3	3478.29	314														2414.12	918.999
04072017_Apo_HeLa_Pattern34_w11 GFP.TIF	3	2421.32	650		20170515 20XLD_HeLa_confined_pattern_w41 GFP.TIF		4825.88	706.5		20170614_LD_HeLa_Pattern100_w11 GFP.TIF	3	5439.75	280		04072017_Apo_HeLa_Pattern65_w11 GFP.TIF	1	2213.39	314														3102.28	1168.61
04072017_Apo_HeLa_Pattern35_w11 GFP.TIF	1	2880.98	650		20170515 20XLD_HeLa_confined_pattern_w41 GFP.TIF		2339.82	706.5		20170614_LD_HeLa_Pattern101_w11 GFP.TIF	1	2583.18	280		04072017_Apo_HeLa_Pattern65_w11 GFP.TIF	2	1939.04	314														1652.67	1503.2
04072017_Apo_HeLa_Pattern35_w11 GFP.TIF	2	2322.91	650		20170515 20XLD_HeLa_confined_pattern_w41 GFP.TIF		2917.92	706.5		20170614_LD_HeLa_Pattern101_w11 GFP.TIF	2	1808.07	280		04072017_Apo_HeLa_Pattern66_w11 GFP.TIF	1	2522.41	314														1939.51	635.062
04072017_Apo_HeLa_Pattern35_w11 GFP.TIF	3	1923.59	650		20170515 20XLD_HeLa_confined_pattern1_w41 GFP.TIF		2202.02	706.5		20170614_LD_HeLa_Pattern101_w11 GFP.TIF	3	2270.49	280		04072017_Apo_HeLa_Pattern66_w11 GFP.TIF	2	1949.28	314														3196.25	1896.76
04072017_Apo_HeLa_Pattern35_w11 GFP.TIF	4	2388	650		20170515 20XLD_HeLa_confined_pattern2_w41 GFP.TIF		2416.82	706.5		20170614_LD_HeLa_Pattern102_w11 GFP.TIF	1	2410.54	280		04072017_Apo_HeLa_Pattern67_w11 GFP.TIF	1	2800.1	314														2944.47	1350.83
04072017_Apo_HeLa_Pattern36_w11 GFP.TIF	1	4007.66	650		20170515 20XLD_HeLa_confined_pattern2_w41 GFP.TIF		4923.44	706.5		20170614_LD_HeLa_Pattern102_w11 GFP.TIF	2	3444.89	280		04072017_Apo_HeLa_Pattern67_w11 GFP.TIF	2	2771.96	314														2645.7	1117.86
04072017_Apo_HeLa_Pattern37_w11 GFP.TIF	1	2559.46	650		20170515 20XLD_HeLa_confined_pattern2_w41 GFP.TIF		4931.01	706.5		20170614_LD_HeLa_Pattern103_w11 GFP.TIF	1	1789.52	280		04072017_Apo_HeLa_Pattern67_w11 GFP.TIF	3	1932.24	314														1516.6	773.807
04072017_Apo_HeLa_Pattern38_w11 GFP.TIF	1	1313.67	650		20170515 20XLD_HeLa_confined_pattern29_w41 GFP.TIF		3351.86	706.5		20170614_LD_HeLa_Pattern104_w11 GFP.TIF	1	3018.63	280		04072017_Apo_HeLa_Pattern67_w11 GFP.TIF	4	2373.21	314														2220.86	1510.07
04072017_Apo_HeLa_Pattern40_w11 GFP.TIF	1	2984.22	650		20170515 20XLD_HeLa_confined_pattern29_w41 GFP.TIF		1871.39	706.5		20170614_LD_HeLa_Pattern104_w11 GFP.TIF	2	2762.59	280		04072017_Apo_HeLa_Pattern68_w11 GFP.TIF	1	2877.47	314														3009.28	1482.51
04072017_Apo_HeLa_Pattern47_w11 GFP.TIF	1	2538.68	650		20170515 20XLD_HeLa_confined_pattern29_w41 GFP.TIF		2618.49	706.5		20170614_LD_HeLa_Pattern104_w11 GFP.TIF	3	1935.61	280		04072017_Apo_HeLa_Pattern68_w11 GFP.TIF	2	3229.11	314														4533.16	1003.45
04072017_Apo_HeLa_Pattern50_w11 GFP.TIF	1	3349.89	650		20170515 20XLD_HeLa_confined_pattern29_w41 GFP.TIF		2723.07	706.5		20170614_LD_HeLa_Pattern105_w11 GFP.TIF	1	3372.01	280		04072017_Apo_HeLa_Pattern68_w11 GFP.TIF	3	2228.97	314														3030.72	1224.78
04072017_Apo_HeLa_Pattern51_w11 GFP.TIF	1	3032.94	650		20170515 20XLD_HeLa_confined_pattern29_w41 GFP.TIF		2001.26	706.5		20170614_LD_HeLa_Pattern106_w11 GFP.TIF	1	2352.31	280		04072017_Apo_HeLa_Pattern68_w11 GFP.TIF	4	4256.54	314														2633.22	1137.83
04072017_Apo_HeLa_Pattern51_w11 GFP.TIF	2	2983.18	650		20170515 20XLD_HeLa_confined_pattern29_w41 GFP.TIF		2121.86	706.5		20170614_LD_HeLa_Pattern107_w11 GFP.TIF	1	2314.22	280		04072017_Apo_HeLa_Pattern68_w11 GFP.TIF	5	2348.57	314														3024.85	1536.38
04072017_Apo_HeLa_Pattern51_w11 GFP.TIF	3	4087.95	650		20170515 20XLD_HeLa_confined_pattern29_w41 GFP.TIF		1602.11	706.5		20170614_LD_HeLa_Pattern108_w11 GFP.TIF	1	2592.76	280		04072017_Apo_HeLa_Pattern68_w11 GFP.TIF	6	4125.13	314														2510.89	1038.19
04072017_Apo_HeLa_Pattern52_w11 GFP.TIF	1	2427.1	650		20170515 20XLD_HeLa_confined_pattern29_w41 GFP.TIF		1420.13	706.5		20170614_LD_HeLa_Pattern109_w11 GFP.TIF	1	1841.56	280		04072017_Apo_HeLa_Pattern69_w11 GFP.TIF	1	2662.44	314														4401.88	296.938
04072017_Apo_HeLa_Pattern52_w11 GFP.TIF	2	3416.83	650		20170515 20XLD_HeLa_confined_pattern29_w41 GFP.TIF		3277.31	706.5		20170614_LD_HeLa_Pattern109_w11 GFP.TIF	2	3022.57	280		04072017_Apo_HeLa_Pattern69_w11 GFP.TIF	2	3871.95	314														2181.79	681.553
04072017_Apo_HeLa_Pattern53_w11 GFP.TIF	1	2119.83	650		20170515 20XLD_HeLa_confined_pattern3_w41 GFP.TIF		4470.47	706.5		20170614_LD_HeLa_Pattern110_w11 GFP.TIF	1	1813.82	280		04072017_Apo_HeLa_Pattern69_w11 GFP.TIF	3	1995.95	314														1832.6	818.217
04072017_Apo_HeLa_Pattern54_w11 GFP.TIF	1	3878.57	650		20170515 20XLD_HeLa_confined_pattern3_w41 GFP.TIF		3145.36	706.5		20170614_LD_HeLa_Pattern110_w11 GFP.TIF	2	3043	280		04072017_Apo_HeLa_Pattern69_w11 GFP.TIF	4	2604.09	314														1745.57	837.354
04072017_Apo_HeLa_Pattern54_w11 GFP.TIF	2	4000.55	650		20170515 20XLD_HeLa_confined_pattern3_w41 GFP.TIF		3009.67	706.5		20170614_LD_HeLa_Pattern110_w11 GFP.TIF	3	3428.94	280		04072017_Apo_HeLa_Pattern69_w11 GFP.TIF	5	3959.81	314														1842.99	675.001
04072017_Apo_HeLa_Pattern55_w11 GFP.TIF	1	3631.25	650		20170515 20XLD_HeLa_confined_pattern3_w41 GFP.TIF		1544.14	706.5		20170614_LD_HeLa_Pattern111_w11 GFP.TIF	1	2158.67	280		04072017_Apo_HeLa_Pattern69_w11 GFP.TIF	6	2211.76	314														3316.61	1589.84
04072017_Apo_HeLa_Pattern6_w11 GFP.TIF	1	1681.68	650		20170515 20XLD_HeLa_confined_pattern30_w41 GFP.TIF		2919.3	706.5		20170614_LD_HeLa_Pattern111_w11 GFP.TIF	2	2163.75	280		04072017_Apo_HeLa_Pattern69_w11 GFP.TIF	7	1766.53	314														2274.09	1430.92
04072017_Apo_HeLa_Pattern7_w11 GFP.TIF	1	3392.26	650		20170515 20XLD_HeLa_confined_pattern30_w41 GFP.TIF		2904.74	706.5		20170614_LD_HeLa_Pattern112_w11 GFP.TIF	1	2109.49	280		04072017_Apo_HeLa_Pattern70_w11 GFP.TIF	1	3446.98	314														2756.64	1452.45
04072017_Apo_HeLa_Pattern8_w11 GFP.TIF	1	2842.19	650		20170515 20XLD_HeLa_confined_pattern30_w41 GFP.TIF		2538.46	706.5		20170614_LD_HeLa_Pattern112_w11 GFP.TIF	2	1783.1	280		04072017_Apo_HeLa_Pattern71_w11 GFP.TIF	1	3380.71	314														2511.4	1016.77
04072017_LD_HeLa_Pattern104_w11 GFP.TIF	1	2495.35	650		20170515 20XLD_HeLa_confined_pattern30_w41 GFP.TIF		2510.72	706.5		20170614_LD_HeLa_Pattern113_w11 GFP.TIF	1	4332.6	280		04072017_Apo_HeLa_Pattern71_w11 GFP.TIF	2	2785.9	314														1663.87	1228.94
04072017_LD_HeLa_Pattern105_w11 GFP.TIF	1	2653.94	650		20170515 20XLD_HeLa_confined_pattern30_w41 GFP.TIF		2488.01	706.5		20170614_LD_HeLa_Pattern113_w11 GFP.TIF	2	4332.6	280		04072017_Apo_HeLa_Pattern71_w11 GFP.TIF	3	2302.44	314														1400.49	1080.1
04072017_LD_HeLa_Pattern106_w11 GFP.TIF	1	2683.92	650		20170515 20XLD_HeLa_confined_pattern31_w41 GFP.TIF		4846.51	706.5		20170614_LD_HeLa_Pattern113_w11 GFP.TIF	3	3204.61	280		04072017_Apo_HeLa_Pattern71_w11 GFP.TIF	4	1895.87	314														1535.48	1590.57
04072017_LD_HeLa_Pattern106_w11 GFP.TIF	2	2120.19	650		20170515 20XLD_HeLa_confined_pattern31_w41 GFP.TIF		3646.51	706.5		20170614_LD_HeLa_Pattern113_w11 GFP.TIF	4	3244.09	280		04072017_Apo_HeLa_Pattern71_w11 GFP.TIF	5	2395.66	314														1997.37	816.865
04072017_LD_HeLa_Pattern106_w11 GFP.TIF	3	4602.97	650		20170515 20XLD_HeLa_confined_pattern32_w41 GFP.TIF		1250.83	706.5		20170614_LD_HeLa_Pattern113_w11 GFP.TIF	5	1709.57	280		04072017_Apo_HeLa_Pattern72_w11 GFP.TIF	1	1973.89	314														2630.55	1092.48
04072017_LD_HeLa_Pattern106_w11 GFP.TIF	4	2210.07	650		20170515 20XLD_HeLa_confined_pattern33_w41 GFP.TIF		2512.58	706.5		20170614_LD_HeLa_Pattern113_w11 GFP.TIF	6	2417.72	280		04072017_Apo_HeLa_Pattern73_w11 GFP.TIF	1	4155.52	314														3019.47	1678.24
04072017_LD_HeLa_Pattern106_w11 GFP.TIF	5	2883.45	650		20170515 20XLD_HeLa_confined_pattern33_w41 GFP.TIF		1951.71	706.5		20170614_LD_HeLa_Pattern113_w11 GFP.TIF	7	1923.65	280		04072017_Apo_HeLa_Pattern73_w11 GFP.TIF	2	2383.13	314														2210.6	376.191
04072017_LD_HeLa_Pattern106_w11 GFP.TIF	6	3534.41	650		20170515 20XLD_HeLa_confined_pattern34_w41 GFP.TIF		1531.38	706.5		20170614_LD_HeLa_Pattern113_w11 GFP.TIF	8	2590.98	280		04072017_Apo_HeLa_Pattern73_w11 GFP.TIF	3	4872.36	314														2202.75	1176.73
04072017_LD_HeLa_Pattern107_w11 GFP.TIF	1	2058.81	650		20170515 20XLD_HeLa_confined_pattern34_w41 GFP.TIF		1531.38	706.5		20170614_LD_HeLa_Pattern113_w11 GFP.TIF	9	1831.69	280		04072017_Apo_HeLa_Pattern73_w11 GFP.TIF	4	2346.12	314														3562.76	1735.66
04072017_LD_HeLa_Pattern107_w11 GFP.TIF	2	2993.16	650		20170515 20XLD_HeLa_confined_pattern34_w41 GFP.TIF		2067.31	706.5		20170614_LD_HeLa_Pattern114_w11 GFP.TIF	1	2866.42	280		04072017_Apo_HeLa_Pattern73_w11 GFP.TIF	5	2931.42	314														1603.08	1284.89
04072017_LD_HeLa_Pattern108_w11 GFP.TIF	1	3123.46	650		20170515 20XLD_HeLa_confined_pattern35_w41 GFP.TIF		3261.75	706.5		20170614_LD_HeLa_Pattern114_w11 GFP.TIF	2	2894.41	280		04072017_Apo_HeLa_Pattern73_w11 GFP.TIF	6	3090.28	314														3212.76	944.897
04072017_LD_HeLa_Pattern109_w11 GFP.TIF	1	3844.64	650		20170515 20XLD_HeLa_confined_pattern35_w41 GFP.TIF		2648.77	706.5		20170614_LD_HeLa_Pattern114_w11 GFP.TIF	3	2336	280		04072017_Apo_HeLa_Pattern73_w11 GFP.TIF	7	2662.22	314														3404.29	876.045
04072017_LD_HeLa_Pattern109_w11 GFP.TIF	2	2164.67	650		20170515 20XLD_HeLa_confined_pattern36_w41 GFP.TIF		2556.93	706.5		20170614_LD_HeLa_Pattern114_w11 GFP.TIF	4	2253.55	280		04072017_Apo_HeLa_Pattern74_w11 GFP.TIF	1	3881.9	314														1797.07	700.17
04072017_LD_HeLa_Pattern110_w11 GFP.TIF	1	3646.03	650		20170515 20XLD_HeLa_confined_pattern36_w41 GFP.TIF		2187.94	706.5		20170614_LD_HeLa_Pattern114_w11 GFP.TIF	5	2202.21	280		04072017_Apo_HeLa_Pattern74_w11 GFP.TIF	2	5236.07	314														2623.89	1407.31
04072017_LD_HeLa_Pattern110_w11 GFP.TIF	2	2833.32	650		20170515 20XLD_HeLa_confined_pattern37_w41 GFP.TIF		1684.89	706.5		20170614_LD_HeLa_Pattern115_w11 GFP.TIF	1	2258.56	280		04072017_Apo_HeLa_Pattern74_w11 GFP.TIF	3	2886.87	314														2978.97	1281.98
04072017_LD_HeLa_Pattern112_w11 GFP-1.tif	1	2378.99	650		20170515 20XLD_HeLa_confined_pattern37_w41 GFP.TIF		1309.05	706.5		20170614_LD_HeLa_Pattern115_w11 GFP.TIF	2	2232.23	280		04072017_Apo_HeLa_Pattern74_w11 GFP.TIF	4	4032.52	314														1738.11	706.826
04072017_LD_HeLa_Pattern112_w11 GFP-1.tif	2	3136.85	650		20170515 20XLD_HeLa_confined_pattern37_w41 GFP.TIF		2689.44	706.5		20170614_LD_HeLa_Pattern115_w11 GFP.TIF	3	1625.02	280		04072017_Apo_HeLa_Pattern74_w11 GFP.TIF	5	3441.25	314														1989.95	1100.07
04072017_LD_HeLa_Pattern112_w11 GFP-2.tif	1	3342.14	650		20170515 20XLD_HeLa_confined_pattern37_w41 GFP.TIF		2649.92	706.5		20170614_LD_HeLa_Pattern115_w11 GFP.TIF	4	2642.59	280		04072017_Apo_HeLa_Pattern75_w11 GFP.TIF	1	2052.31	314														1938.77	1088.95
04072017_LD_HeLa_Pattern112_w11 GFP-2.tif	2	2260.05	650		20170515 20XLD_HeLa_confined_pattern37_w41 GFP.TIF		2237.83	706.5		20170614_LD_HeLa_Pattern116_w11 GFP.TIF	1	1812.39	280		04072017_Apo_HeLa_Pattern75_w11 GFP.TIF	2	1623.01	314														3067.52	867.62
04072017_LD_HeLa_Pattern112_w11 GFP-2.tif	3	2055.43	650		20170515 20XLD_HeLa_confined_pattern39_w41 GFP.TIF		1726.08	706.5		20170614_LD_HeLa_Pattern116_w11 GFP.TIF	2	1913.26	280		04072017_Apo_HeLa_Pattern75_w11 GFP.TIF	3	2381.92	314														1982.88	606.356
04072017_LD_HeLa_Pattern112_w11 GFP-2.tif	4	2373.2	650		20170515 20XLD_HeLa_confined_pattern39_w41 GFP.TIF		1359.78	706.5		20170614_LD_HeLa_Pattern117_w11 GFP.TIF	1	2291.11	280		04072017_Apo_HeLa_Pattern76_w11 GFP.TIF	1	2457.13	314														2487.9	225.382
04072017_LD_HeLa_Pattern113_w11 GFP.TIF	1	2719.98	650		20170515 20XLD_HeLa_confined_pattern39_w41 GFP.TIF		2441.83	706.5		20170614_LD_HeLa_Pattern117_w11 GFP.TIF	2	1444.95	280		04072017_Apo_HeLa_Pattern76_w11 GFP.TIF	2	2855.44	314														1782.52	485.397
04072017_LD_HeLa_Pattern113_w11 GFP.TIF	2	4369.38	650		20170515 20XLD_HeLa_confined_pattern39_w41 GFP.TIF		1295.02	706.5		20170614_LD_HeLa_Pattern117_w11 GFP.TIF	3	1860.82	280		04072017_Apo_HeLa_Pattern76_w11 GFP.TIF	3	3062.05	314														2009.44	569.226
04072017_LD_HeLa_Pattern114_w11 GFP.TIF	1	2859.87	650		20170515 20XLD_HeLa_confined_pattern39_w41 GFP.TIF		1542.24	706.5		20170614_LD_HeLa_Pattern117_w11 GFP.TIF	4	2015.52	280		04072017_LD_HeLa_Pattern150_w11 GFP.TIF	1	4433.82	314														2615.31	860.548
04072017_LD_HeLa_Pattern115_w11 GFP.TIF	1	2746.81	650		20170515 20XLD_HeLa_confined_pattern39_w41 GFP.TIF		1726.08	706.5		20170614_LD_HeLa_Pattern117_w11 GFP.TIF	5	1674.04	280		04072017_LD_HeLa_Pattern150_w11 GFP.TIF	2	3735.76	314														3392.34	1115.88
04072017_LD_HeLa_Pattern116_w11 GFP.TIF	1	3325.05	650		20170515 20XLD_HeLa_confined_pattern4_w41 GFP.TIF		3373.96	706.5		20170614_LD_HeLa_Pattern117_w11 GFP.TIF	6	2131.22	280		04072017_LD_HeLa_Pattern151_w11 GFP.TIF	1	2848.67	314														1910.81	197.092
04072017_LD_HeLa_Pattern117_w11 GFP.TIF	1	3757.23	650		20170515 20XLD_HeLa_confined_pattern4_w41 GFP.TIF		2873.96	706.5		20170614_LD_HeLa_Pattern118_w11 GFP.TIF	1	3268.74	280		04072017_LD_HeLa_Pattern151_w11 GFP.TIF	2	2167.02	314														2248.02	779.215
04072017_LD_HeLa_Pattern119_w11 GFP.TIF	1	3161.56	650		20170515 20XLD_HeLa_confined_pattern4_w41 GFP.TIF		2421.47	706.5		20170614_LD_HeLa_Pattern118_w11 GFP.TIF	2	2322.51	280		04072017_LD_HeLa_Pattern151_w11 GFP.TIF	3	1637.74	314														1911	1030.91
04072017_LD_HeLa_Pattern120_w11 GFP.TIF	1	3941.18	650		20170515 20XLD_HeLa_confined_pattern40_w41 GFP.TIF		1877.35	706.5		20170614_LD_HeLa_Pattern118_w11 GFP.TIF	3	2078.31	280		04072017_LD_HeLa_Pattern151_w11 GFP.TIF	4	1816.09	314														1771.02	605.628
04072017_LD_HeLa_Pattern86_w11 GFP.TIF	1	3458.43	650		20170515 20XLD_HeLa_confined_pattern40_w41 GFP.TIF		1854.75	706.5		20170614_LD_HeLa_Pattern118_w11 GFP.TIF	4	2059.53	280		04072017_LD_HeLa_Pattern151_w11 GFP.TIF	5	3085.16	314														2920.16	919.207
04072017_LD_HeLa_Pattern87_w11 GFP.TIF	1	5652.65	650		20170515 20XLD_HeLa_confined_pattern40_w41 GFP.TIF		2258.86	706.5		20170614_LD_HeLa_Pattern118_w11 GFP.TIF	5	2804.25	280		04072017_LD_HeLa_Pattern152_w11 GFP.TIF	1	1621.18	314														2775.96	782.335
04072017_LD_HeLa_Pattern88_w11 GFP.TIF	1	3144.5	650		20170515 20XLD_HeLa_confined_pattern40_w41 GFP.TIF		1601.15	706.5		20170614_LD_HeLa_Pattern118_w11 GFP.TIF	6	2914.17	280		04072017_LD_HeLa_Pattern152_w11 GFP.TIF	2	3566.9	314														2045.46	1369.24
04072017_LD_HeLa_Pattern90_w11 GFP.TIF	1	2062.79	650		20170515 20XLD_HeLa_confined_pattern40_w41 GFP.TIF		2003.03	706.5		20170614_LD_HeLa_Pattern118_w11 GFP.TIF	7	2869.88	280		04072017_LD_HeLa_Pattern153_w11 GFP.TIF	1	2555.41	314														2156.12	444.315
04072017_LD_HeLa_Pattern93_w11 GFP.TIF	1	3098.57	650		20170515 20XLD_HeLa_confined_pattern41_w41 GFP.TIF		1780.15	706.5		20170614_LD_HeLa_Pattern119_w11 GFP.TIF	1	2486.09	280		04072017_LD_HeLa_Pattern154_w11 GFP.TIF	1	2544.63	314														2035.42	725.132
04072017_LD_HeLa_Pattern97_w11 GFP.TIF	1	3205.96	650		20170515 20XLD_HeLa_confined_pattern41_w41 GFP.TIF		3505.03	706.5		20170614_LD_HeLa_Pattern119_w11 GFP.TIF	2	3550.88	280		04072017_LD_HeLa_Pattern154_w11 GFP.TIF	2	1744.41	314														2313.1	1047.45
04072017_LD_HeLa_Pattern98_w11 GFP.TIF	1	2932.23	650		20170515 20XLD_HeLa_confined_pattern41_w41 GFP.TIF		1403.3	706.5		20170614_LD_HeLa_Pattern120_w11 GFP.TIF	1	2889.35	280		04072017_LD_HeLa_Pattern154_w11 GFP.TIF	3	1845.69	314														2110.25	1088.95
04072017_LD_HeLa_Pattern98_w11 GFP.TIF	2	4017.93	650		20170515 20XLD_HeLa_confined_pattern41_w41 GFP.TIF		2321.54	706.5		20170614_LD_HeLa_Pattern120_w11 GFP.TIF	2	2404.16	280		04072017_LD_HeLa_Pattern155_w11 GFP.TIF	1	2482.02	314														2468.63	1892.6
04072017_LD_HeLa_Pattern98_w11 GFP.TIF	3	2416.13	650		20170515 20XLD_HeLa_confined_pattern43_w41 GFP.TIF		2210.58	706.5		20170614_LD_HeLa_Pattern121_w11 GFP.TIF	1	3744.9	280		04072017_LD_HeLa_Pattern155_w11 GFP.TIF	2	1661.1	314														2197.02	487.997
04072017_LD_HeLa_Pattern99_w11 GFP.TIF	1	2278.38	650		20170515 20XLD_HeLa_confined_pattern43_w41 GFP.TIF		2576.79	706.5		20170614_LD_HeLa_Pattern121_w11 GFP.TIF	2	2647.18	280		04072017_LD_HeLa_Pattern155_w11 GFP.TIF	3	3912.9	314														2204.69	1096.02
04072017_LD_HeLa_Pattern99_w11 GFP.TIF	2	2074.16	650		20170515 20XLD_HeLa_confined_pattern43_w41 GFP.TIF		1306.33	706.5		20170614_LD_HeLa_Pattern121_w11 GFP.TIF	3	2357.84	280		04072017_LD_HeLa_Pattern155_w11 GFP.TIF	4	2328.17	314														2462.45	703.29
20170614_LD_HeLa_Pattern19_w11 GFP.TIF	1	4063.35	650		20170515 20XLD_HeLa_confined_pattern43_w41 GFP.TIF		2668.31	706.5		20170614_LD_HeLa_Pattern124_w11 GFP.TIF	1	3235	280		04072017_LD_HeLa_Pattern155_w11 GFP.TIF	5	2299.76	314														2228.21	617.381
20170614_LD_HeLa_Pattern20_w11 GFP.TIF	1	3102.4	650		20170515 20XLD_HeLa_confined_pattern44_w41 GFP.TIF		2240.87	706.5		20170614_LD_HeLa_Pattern124_w11 GFP.TIF	2	1186.39	280		04072017_LD_HeLa_Pattern155_w11 GFP.TIF	6	2535.88	314														2028.51	825.082
20170614_LD_HeLa_Pattern22_w11 GFP.TIF	1	1517.89	650		20170515 20XLD_HeLa_confined_pattern44_w41 GFP.TIF		1206.23	706.5		20170614_LD_HeLa_Pattern124_w11 GFP.TIF	3	1751.31	280		04072017_LD_HeLa_Pattern156_w11 GFP.TIF	1	1915.09	314														2090.02	792.944
20170614_LD_HeLa_Pattern23_w11 GFP.TIF	1	1442.82	650		20170515 20XLD_HeLa_confined_pattern44_w41 GFP.TIF		1915.79	706.5		20170614_LD_HeLa_Pattern124_w11 GFP.TIF	4	2751.29	280		04072017_LD_HeLa_Pattern156_w11 GFP.TIF	2	2150.48	314														2908.08	1151.45
20170614_LD_HeLa_Pattern26_w11 GFP.TIF	1	3842.87	650		20170515 20XLD_HeLa_confined_pattern44_w41 GFP.TIF		1624.53	706.5		20170614_LD_HeLa_Pattern125_w11 GFP.TIF	1	1765.26	280		04072017_LD_HeLa_Pattern156_w11 GFP.TIF	3	1994.38	314														1838.25	981.923
20170614_LD_HeLa_Pattern27_w11 GFP.TIF	1	2749.59	650		20170515 20XLD_HeLa_confined_pattern45_w41 GFP.TIF		2293.16	706.5		20170614_LD_HeLa_Pattern128_w11 GFP.TIF	1	2164.58	280		04072017_LD_HeLa_Pattern157_w11 GFP.TIF	1	2683.02	314														3930.55	1762.59
20170614_LD_HeLa_Pattern27_w11 GFP.TIF	2	2448.87	650		20170515 20XLD_HeLa_confined_pattern45_w41 GFP.TIF		1585.46	706.5		20170614_LD_HeLa_Pattern129_w11 GFP.TIF	1	2144.45	280		04072017_LD_HeLa_Pattern158_w11 GFP.TIF	1	6206.76	314														1964.93	418.001
20170614_LD_HeLa_Pattern30_w11 GFP.TIF	1	2910.88	650		20170515 20XLD_HeLa_confined_pattern46_w41 GFP.TIF		2503.4	706.5		20170614_LD_HeLa_Pattern129_w11 GFP.TIF	2	2845.43	280		04072017_LD_HeLa_Pattern158_w11 GFP.TIF	2	5734.21	314														1783.54	802.096
20170614_LD_HeLa_Pattern31_w11 GFP.TIF	1	2836.02	650		20170515 20XLD_HeLa_confined_pattern47_w41 GFP.TIF		2498.16	706.5		20170614_LD_HeLa_Pattern130_w11 GFP.TIF	1	2647.33	280		04072017_LD_HeLa_Pattern159_w11 GFP.TIF	1	2158.77	314														2103.38	1032.68
20170614_LD_HeLa_Pattern33_w11 GFP.TIF	1	2774.88	650		20170515 20XLD_HeLa_confined_pattern47_w41 GFP.TIF		1761.75	706.5		20170614_LD_HeLa_Pattern131_w11 GFP.TIF	1	2294.11	280		04072017_LD_HeLa_Pattern159_w11 GFP.TIF	2	2176.17	314														3181.74	1535.13
20170614_LD_HeLa_Pattern34_w11 GFP.TIF	1	2709.1	650		20170515 20XLD_HeLa_confined_pattern48_w41 GFP.TIF		2610.67	706.5		20170614_LD_HeLa_Pattern185_w11 GFP.TIF	1	3317.27	280		04072017_LD_HeLa_Pattern159_w11 GFP.TIF	3	1966.06	314														3544.89	1818.65
20170614_LD_HeLa_Pattern35_w11 GFP.TIF	1	1899.79	650		20170515 20XLD_HeLa_confined_pattern48_w41 GFP.TIF		3185.17	706.5		20170614_LD_HeLa_Pattern186_w11 GFP.TIF	1	2746.27	280		04072017_LD_HeLa_Pattern159_w11 GFP.TIF	4	2040.64	314														2741.78	263.344
20170614_LD_HeLa_Pattern36_w11 GFP.TIF	1	1733.79	650		20170515 20XLD_HeLa_confined_pattern50_w41 GFP.TIF		1931.23	706.5		20170614_LD_HeLa_Pattern187_w11 GFP.TIF	1	2846.05	280		04072017_LD_HeLa_Pattern159_w11 GFP.TIF	5	2783.2	314														1316.88	1736.38
20170614_LD_HeLa_Pattern37_w11 GFP.TIF	1	2049.98	650		20170515 20XLD_HeLa_confined_pattern50_w41 GFP.TIF		1971.7	706.5		20170614_LD_HeLa_Pattern187_w11 GFP.TIF	2	3830.32	280		04072017_LD_HeLa_Pattern159_w11 GFP.TIF	6	2111.91	314														2165.63	618.109
20170614_LD_HeLa_Pattern38_w11 GFP.TIF	1	3334.44	650		20170515 20XLD_HeLa_confined_pattern50_w41 GFP.TIF		3365.05	706.5		20170614_LD_HeLa_Pattern187_w11 GFP.TIF	3	2925.28	280		04072017_LD_HeLa_Pattern160_w11 GFP.TIF	1	2037.41	314														1797.18	825.394
20170614_LD_HeLa_Pattern39_w11 GFP.TIF	1	1844.5	650		20170515 20XLD_HeLa_confined_pattern50_w41 GFP.TIF		2851.66	706.5		20170614_LD_HeLa_Pattern187_w11 GFP.TIF	4	2579.63	280		04072017_LD_HeLa_Pattern161_w11 GFP.TIF	1	1714.15	314														2083.08	817.281
20170614_LD_HeLa_Pattern40_w11 GFP.TIF	1	2984.51	650		20170515 20XLD_HeLa_confined_pattern51_w41 GFP.TIF		2446.3	706.5		20170614_LD_HeLa_Pattern188_w11 GFP.TIF	1	2777.59	280		04072017_LD_HeLa_Pattern161_w11 GFP.TIF	2	2801.16	314														1956.25	649.311
20170614_LD_HeLa_Pattern41_w11 GFP.TIF	1	2210.98	650		20170515 20XLD_HeLa_confined_pattern51_w41 GFP.TIF		2347.21	706.5		20170614_LD_HeLa_Pattern189_w11 GFP.TIF	1	3424.21	280		04072017_LD_HeLa_Pattern161_w11 GFP.TIF	3	4546.86	314														3300.52	1217.19
20170614_LD_HeLa_Pattern42_w11 GFP.TIF	1	2518.1	650		20170515 20XLD_HeLa_confined_pattern51_w41 GFP.TIF		2337.57	706.5		20170614_LD_HeLa_Pattern189_w11 GFP.TIF	2	5404.09	280		04072017_LD_HeLa_Pattern161_w11 GFP.TIF	4	1851.94	314														2038.32	1629.99
20170614_LD_HeLa_Pattern43_w11 GFP.TIF	1	2741.44	650		20170515 20XLD_HeLa_confined_pattern51_w41 GFP.TIF		2783.05	706.5		20170614_LD_HeLa_Pattern190_w11 GFP.TIF	1	2021.62	280		04072017_LD_HeLa_Pattern162_w11 GFP.TIF	1	2281.6	314														1994.27	963.41
20170614_LD_HeLa_Pattern45_w11 GFP.TIF	1	1738.85	650		20170515 20XLD_HeLa_confined_pattern51_w41 GFP.TIF		1044.16	706.5		20170614_LD_HeLa_Pattern190_w11 GFP.TIF	2	2381.91	280		04072017_LD_HeLa_Pattern163_w11 GFP.TIF	1	3805.77	314														2748.19	169.426
20170614_LD_HeLa_Pattern46_w11 GFP.TIF	1	3202.34	650		20170515 20XLD_HeLa_confined_pattern52_w41 GFP.TIF		2313.72	706.5		20170614_LD_HeLa_Pattern191_w11 GFP.TIF	1	3232.23	280		04072017_LD_HeLa_Pattern163_w11 GFP.TIF	2	3087.99	314														1767.72	882.493
20170614_LD_HeLa_Pattern47_w11 GFP.TIF	1	3568.11	650		20170515 20XLD_HeLa_confined_pattern52_w41 GFP.TIF		2618.57	706.5		20170614_LD_HeLa_Pattern193-1_w11 GFP.tif	1	2670.66	280		04072017_LD_HeLa_Pattern163_w11 GFP.TIF	3	2952.54	314														2422.26	901.11
20170614_LD_HeLa_Pattern48_w11 GFP.TIF	1	2830.61	650		20170515 20XLD_HeLa_confined_pattern53_w41 GFP.TIF		1819.5	706.5		20170614_LD_HeLa_Pattern193-1_w11 GFP.tif	2	1911.52	280		04072017_LD_HeLa_Pattern163_w11 GFP.TIF	4	2293.49	314														2327.39	1004.39
20170614_LD_HeLa_Pattern48_w11 GFP.TIF	2	2099.91	650		20170515 20XLD_HeLa_confined_pattern53_w41 GFP.TIF		2241.8	706.5		20170614_LD_HeLa_Pattern194_w11 GFP.TIF	1	2229.13	280		04072017_LD_HeLa_Pattern164_w11 GFP.TIF	1	1933.01	314														2001.28	441.299
					20170614_LD_HeLa_Pattern138_w11 GFP.TIF	1	2289.35	706.5		20170614_LD_HeLa_Pattern195_w11 GFP.TIF	1	2114.42	280		04072017_LD_HeLa_Pattern164_w11 GFP.TIF	2	2655	314														3031.21	1002
					20170614_LD_HeLa_Pattern138_w11 GFP.TIF	2	3909.14	706.5		20170614_LD_HeLa_Pattern195_w11 GFP.TIF	3	1935.94	280		04072017_LD_HeLa_Pattern164_w11 GFP.TIF	3	2312.97	314														1854.24	657.111
					20170614_LD_HeLa_Pattern138_w11 GFP.TIF	3	2425.08	706.5		20170614_LD_HeLa_Pattern196_w11 GFP.TIF	1	2809.13	280		04072017_LD_HeLa_Pattern165_w11 GFP.TIF	1	2671.11	314														2933.66	1182.34
					20170614_LD_HeLa_Pattern138_w11 GFP.TIF	4	2846.36	706.5		20170614_LD_HeLa_Pattern196_w11 GFP.TIF	2	1818.72	280		04072017_LD_HeLa_Pattern166_w11 GFP.TIF	1	2199.34	314														1808.86	1633.83
					20170614_LD_HeLa_Pattern138_w11 GFP.TIF	5	6782.75	706.5		20170614_LD_HeLa_Pattern197_w11 GFP.TIF	1	1733.84	280		04072017_LD_HeLa_Pattern166_w11 GFP.TIF	2	2208.42	314														2248.75	1835.29
					20170614_LD_HeLa_Pattern139_w11 GFP.TIF	1	3186.35	706.5		20170614_LD_HeLa_Pattern197_w11 GFP.TIF	2	1590.83	280		04072017_LD_HeLa_Pattern167_w11 GFP.TIF	1	2350.74	314														1926.34	952.593
					20170614_LD_HeLa_Pattern139_w11 GFP.TIF	2	3161.59	706.5		20170614_LD_HeLa_Pattern198_w11 GFP.TIF	1	1858.21	280		04072017_LD_HeLa_Pattern167_w11 GFP.TIF	2	1330.3	314														2520.2	1285.93
					20170614_LD_HeLa_Pattern139_w11 GFP.TIF	3	2302.23	706.5		20170614_LD_HeLa_Pattern198_w11 GFP.TIF	2	2282.35	280		04072017_LD_HeLa_Pattern168_w11 GFP.TIF	1	3102.49	314														2854.01	504.534
					20170614_LD_HeLa_Pattern140_w11 GFP.TIF	1	2730.39	706.5		20170614_LD_HeLa_Pattern199_w11 GFP.TIF	1	2034.72	280		04072017_LD_HeLa_Pattern168_w11 GFP.TIF	2	2526.19	314														1674.53	1667.53
					20170614_LD_HeLa_Pattern140_w11 GFP.TIF	2	2928.35	706.5		20170614_LD_HeLa_Pattern201_w11 GFP.TIF	1	2434.67	280		04072017_LD_HeLa_Pattern168_w11 GFP.TIF	3	1920.3	314														2161.59	472.396
					20170614_LD_HeLa_Pattern141_w11 GFP.TIF	1	2824.22	706.5		20170614_LD_HeLa_Pattern202_w11 GFP.TIF	2	2408.22	280		04072017_LD_HeLa_Pattern168_w11 GFP.TIF	4	1773.28	314														2226.76	844.115
					20170614_LD_HeLa_Pattern141_w11 GFP.TIF	2	2956.73	706.5		20170614_LD_HeLa_Pattern202_w11 GFP.TIF	3	1609.55	280		04072017_LD_HeLa_Pattern169_w11 GFP.TIF	1	2349.84	314														2676.74	1421.56
					20170614_LD_HeLa_Pattern141_w11 GFP.TIF	3	2422.23	706.5		20170614_LD_HeLa_Pattern203_w11 GFP.TIF	1	2593.71	280		04072017_LD_HeLa_Pattern169_w11 GFP.TIF	2	2378.07	314														2548.39	1200.34
					20170614_LD_HeLa_Pattern141_w11 GFP.TIF	4	2249.78	706.5		20170614_LD_HeLa_Pattern203_w11 GFP.TIF	2	2453.67	280		04072017_LD_HeLa_Pattern170_w11 GFP.TIF	1	3780.87	314														3035.66	1416.25
					20170614_LD_HeLa_Pattern141_w11 GFP.TIF	5	3517.37	706.5		20170614_LD_HeLa_Pattern203_w11 GFP.TIF	3	5261.41	280		04072017_LD_HeLa_Pattern170_w11 GFP.TIF	2	3500.34	314														2004.11	909.639
					20170614_LD_HeLa_Pattern142_w11 GFP.TIF	1	1301.12	706.5		20170614_LD_HeLa_Pattern203_w11 GFP.TIF	4	3472.65	280		04072017_LD_HeLa_Pattern170_w11 GFP.TIF	3	3021.63	314														2607.35	796.376
					20170614_LD_HeLa_Pattern142_w11 GFP.TIF	2	2570.64	706.5		20170614_LD_HeLa_Pattern203_w11 GFP.TIF	5	2008.73	280		04072017_LD_HeLa_Pattern171-1_w11 GFP.tif	1	3649.69	314														2678.39	521.695
					20170614_LD_HeLa_Pattern143_w11 GFP.TIF	1	1779.51	706.5		20170614_LD_HeLa_Pattern203_w11 GFP.TIF	6	2345.5	280		04072017_LD_HeLa_Pattern171-1_w11 GFP.tif	2	3802.66	314														1701.48	788.575
					20170614_LD_HeLa_Pattern143_w11 GFP.TIF	2	2006.9	706.5		20170614_LD_HeLa_Pattern203_w11 GFP.TIF	7	2722.37	280		20X_0.8_HeLa_190_w31 GFP.TIF		2815.89	314														2676.31	2542.12
					20170614_LD_HeLa_Pattern143_w11 GFP.TIF	3	2675.42	706.5		20170614_LD_HeLa_Pattern204_w11 GFP.TIF	1	2499.86	280		20X_0.8_HeLa_190_w31 GFP.TIF		1487.25	314														2692.99	1009.8
					20170614_LD_HeLa_Pattern144_w11 GFP.TIF	1	3701.66	706.5		20170614_LD_HeLa_Pattern205_w11 GFP.TIF	1	2375.05	280		20X_0.8_HeLa_190_w31 GFP.TIF		1475.15	314														3399.39	1115.57
					20170614_LD_HeLa_Pattern144_w11 GFP.TIF	2	3421.06	706.5		20170614_LD_HeLa_Pattern205_w11 GFP.TIF	2	3164.04	280		20X_0.8_HeLa_190_w31 GFP.TIF		3446.88	314														2299.09	662.208
					20170614_LD_HeLa_Pattern144_w11 GFP.TIF	3	3424.6	706.5		20170614_LD_HeLa_Pattern205_w11 GFP.TIF	3	2834.12	280		20X_0.8_HeLa_190_w31 GFP.TIF		2288.46	314														2434.15	1125.76
					20170614_LD_HeLa_Pattern144_w11 GFP.TIF	4	3682.44	706.5		20170614_LD_HeLa_Pattern206_w11 GFP.TIF	1	1681.64	280		20X_0.8_HeLa_190_w31 GFP.TIF		2288.46	314														2225.62	987.019
					20170614_LD_HeLa_Pattern144_w11 GFP.TIF	5	2639.3	706.5		20170614_LD_HeLa_Pattern206_w11 GFP.TIF	2	2253.86	280		20X_0.8_HeLa_190_w31 GFP.TIF		2193.15	314														2405.47	842.763
					20170614_LD_HeLa_Pattern144_w11 GFP.TIF	6	3094.63	706.5		20170614_LD_HeLa_Pattern206_w11 GFP.TIF	3	1548.12	280		20X_0.8_HeLa_190_w31 GFP.TIF		2888.53	314														3580.95	1709.76
					20170614_LD_HeLa_Pattern145_w11 GFP.TIF	1	3726.61	706.5		20170614_LD_HeLa_Pattern206_w11 GFP.TIF	4	2437.75	280		20X_0.8_HeLa_190_w31 GFP.TIF		3380.16	314														3675.24	1063.78
					20170614_LD_HeLa_Pattern145_w11 GFP.TIF	2	3806.17	706.5		20170614_LD_HeLa_Pattern207_w11 GFP.TIF	1	2635.27	280		20X_0.8_HeLa_190_w31 GFP.TIF		3468.36	314														3981.63	28.81
					20170614_LD_HeLa_Pattern145_w11 GFP.TIF	3	3128.58	706.5		20170614_LD_HeLa_Pattern207_w11 GFP.TIF	3	3256.42	280		20X_0.8_HeLa_190_w31 GFP.TIF		1511.95	314														1836.28	606.564
					20170614_LD_HeLa_Pattern146_w11 GFP.TIF	1	1817.78	706.5		20170614_LD_HeLa_Pattern207_w11 GFP.TIF	4	2128.34	280		20X_0.8_HeLa_192_w11 GFP Var.TIF		4014.89	314														2354.91	677.185
					20170614_LD_HeLa_Pattern146_w11 GFP.TIF	2	2791.14	706.5		20170614_LD_HeLa_Pattern208_w11 GFP.TIF	1	2895.23	280		20X_0.8_HeLa_192_w11 GFP Var.TIF		3310.87	314														2841.8	807.921
					20170614_LD_HeLa_Pattern146_w11 GFP.TIF	3	1765.64	706.5		20170614_LD_HeLa_Pattern208_w11 GFP.TIF	2	2441.13	280		20X_0.8_HeLa_192_w11 GFP Var.TIF		1676.52	314														3015.93	895.702
					20170614_LD_HeLa_Pattern147_w11 GFP.TIF	1	2326.64	706.5		20170614_LD_HeLa_Pattern208_w11 GFP.TIF	3	1915.38	280		20X_0.8_HeLa_192_w11 GFP Var.TIF		2482.78	314														2811.34	808.129
					20170614_LD_HeLa_Pattern148_w11 GFP.TIF	1	2722.29	706.5		20170614_LD_HeLa_Pattern208_w11 GFP.TIF	4	1500.1	280		20X_0.8_HeLa_192_w11 GFP Var.TIF		1840.28	314														3718.73	1095.29
					20170614_LD_HeLa_Pattern148_w11 GFP.TIF	2	2053.8	706.5		20170614_LD_HeLa_Pattern208_w11 GFP.TIF	5	2783.79	280		20X_0.8_HeLa_192_w11 GFP Var.TIF		3673.2	314														3067.08	715.043
					20170614_LD_HeLa_Pattern149_w11 GFP.TIF	1	2300.13	706.5		20170614_LD_HeLa_Pattern209_w11 GFP.TIF	1	2210.21	280		20X_0.8_HeLa_192_w11 GFP Var.TIF		2860.91	314														2210.73	1118.8
					20170614_LD_HeLa_Pattern149_w11 GFP.TIF	2	3232.43	706.5		20170614_LD_HeLa_Pattern209_w11 GFP.TIF	2	2301.83	280		20X_0.8_HeLa_192_w11 GFP Var.TIF		3915.37	314														3157.95	1015.62
					20170614_LD_HeLa_Pattern150_w11 GFP.TIF	1	2260.97	706.5		20170614_LD_HeLa_Pattern209_w11 GFP.TIF	3	2817.36	280		20X_0.8_HeLa_192_w11 GFP Var.TIF		3966.28	314														1489.31	330.636
					20170614_LD_HeLa_Pattern150_w11 GFP.TIF	2	2066.83	706.5		20170614_LD_HeLa_Pattern209_w11 GFP.TIF	4	2904.35	280		20X_0.8_HeLa_192_w11 GFP Var.TIF		2419.69	314														1855.09	932.208
					20170614_LD_HeLa_Pattern151_w11 GFP.TIF	1	2954.97	706.5		20170614_LD_HeLa_Pattern209_w11 GFP.TIF	5	1885.43	280		20X_0.8_HeLa_193_w11 GFP Var.TIF		2823.55	314														2735.51	1222.07
					20170614_LD_HeLa_Pattern152_w11 GFP.TIF	1	1958.76	706.5		20170614_LD_HeLa_Pattern209_w11 GFP.TIF	6	2656.59	280		20X_0.8_HeLa_193_w11 GFP Var.TIF		1857.66	314														3288.18	1122.23
					20170614_LD_HeLa_Pattern152_w11 GFP.TIF	2	1734.61	706.5		20170614_LD_HeLa_Pattern209_w11 GFP.TIF	7	4212.49	280		20X_0.8_HeLa_193_w11 GFP Var.TIF		2424.82	314														2045.19	642.239
					20170614_LD_HeLa_Pattern152_w11 GFP.TIF	3	2378.23	706.5		20170614_LD_HeLa_Pattern210_w11 GFP.TIF	1	1824.16	280		20X_0.8_HeLa_193_w11 GFP Var.TIF		1671.56	314														2662.96	871.988
					20170614_LD_HeLa_Pattern152_w11 GFP.TIF	4	2314.42	706.5		20170614_LD_HeLa_Pattern210_w11 GFP.TIF	2	2414.61	280		20X_0.8_HeLa_193_w11 GFP Var.TIF		2557.59	314														1700	733.868
					20170614_LD_HeLa_Pattern152_w11 GFP.TIF	5	2230.97	706.5		20170614_LD_HeLa_Pattern210_w11 GFP.TIF	3	1892.34	280		20X_0.8_HeLa_193_w11 GFP Var.TIF		2799.81	314														1857.79	929.816
					20170614_LD_HeLa_Pattern152_w11 GFP.TIF	6	2579.74	706.5		20170614_LD_HeLa_Pattern210_w11 GFP.TIF	4	2333.05	280		20X_0.8_HeLa_193_w11 GFP Var.TIF		2190.47	314														3098.58	1176.83
					20170614_LD_HeLa_Pattern152_w11 GFP.TIF	7	2108.29	706.5		20170614_LD_HeLa_Pattern211-1_w11 GFP.tif	1	2483.65	280		20X_0.8_HeLa_193_w11 GFP Var.TIF		1655.29	314														2404.49	883.741
					20170614_LD_HeLa_Pattern153_w11 GFP.TIF	1	2586.16	706.5		20170614_LD_HeLa_Pattern211-1_w11 GFP.tif	2	1978.3	280		20X_0.8_HeLa_193_w11 GFP Var.TIF		1980.49	314														2652.44	760.806
					20170614_LD_HeLa_Pattern153_w11 GFP.TIF	2	2913.92	706.5		20170614_LD_HeLa_Pattern211-1_w11 GFP.tif	3	2064.29	280		20X_0.8_HeLa_193_w11 GFP Var.TIF		2244.95	314														2453.78	406.768
					20170614_LD_HeLa_Pattern153_w11 GFP.TIF	3	2470.98	706.5		20170614_LD_HeLa_Pattern211-1_w11 GFP.tif	4	2235.43	280		20X_0.8_HeLa_193_w11 GFP Var.TIF		2523.05	314														2315.18	988.267
					20170614_LD_HeLa_Pattern153_w11 GFP.TIF	4	2445.19	706.5		20170614_LD_HeLa_Pattern212_w11 GFP.TIF	1	2357.79	280		20X_0.8_HeLa_194_w11 GFP Var.TIF		3735.73	314														2965.09	737.716
					20170614_LD_HeLa_Pattern154_w11 GFP.TIF	1	2209.62	706.5		20170614_LD_HeLa_Pattern212_w11 GFP.TIF	2	1762.81	280		20X_0.8_HeLa_194_w11 GFP Var.TIF		2888.47	314														2629.69	907.247
					20170614_LD_HeLa_Pattern154_w11 GFP.TIF	2	1372.49	706.5		20170614_LD_HeLa_Pattern212_w11 GFP.TIF	3	2265.83	280		20X_0.8_HeLa_194_w11 GFP Var.TIF		3426.27	314														2375.2	1042.97
					20170614_LD_HeLa_Pattern154_w11 GFP.TIF	3	2438.03	706.5		20170614_LD_HeLa_Pattern212_w11 GFP.TIF	4	3133.38	280		20X_0.8_HeLa_194_w11 GFP Var.TIF		2647.9	314														3584.3	1704.87
					20170614_LD_HeLa_Pattern154_w11 GFP.TIF	4	1533.26	706.5		20170614_LD_HeLa_Pattern84_w11 GFP.TIF	1	3979.08	280		20X_0.8_HeLa_194_w11 GFP Var.TIF		3266.6	314														2799.8	1292.07
					20170614_LD_HeLa_Pattern154_w11 GFP.TIF	5	2614.74	706.5		20170614_LD_HeLa_Pattern85_w11 GFP.TIF	1	2242.02	280		20X_0.8_HeLa_194_w11 GFP Var.TIF		3145.3	314														3385.97	1163.52
					20170614_LD_HeLa_Pattern154_w11 GFP.TIF	6	2126.48	706.5		20170614_LD_HeLa_Pattern86_w11 GFP.TIF	1	3012.81	280		20X_0.8_HeLa_194_w11 GFP Var.TIF		2001.27	314														2917.25	912.551
					20170614_LD_HeLa_Pattern155_w11 GFP.TIF	1	2446.55	706.5		20170614_LD_HeLa_Pattern86_w11 GFP.TIF	2	2376.11	280		20X_0.8_HeLa_195_w11 GFP Var.TIF		6362.24	314														2795.61	1303.2
					20170614_LD_HeLa_Pattern155_w11 GFP.TIF	2	3095.14	706.5		20170614_LD_HeLa_Pattern88_w11 GFP.TIF	1	3342.99	280		20X_0.8_HeLa_195_w11 GFP Var.TIF		2788.81	314														2291.43	794.296
					20170614_LD_HeLa_Pattern156_w11 GFP.TIF	1	2376.42	706.5		20170614_LD_HeLa_Pattern88_w11 GFP.TIF	2	4650.18	280		20X_0.8_HeLa_195_w11 GFP Var.TIF		3167.1	314														2371.18	910.055
					20170614_LD_HeLa_Pattern156_w11 GFP.TIF	2	4836.12	706.5		20170614_LD_HeLa_Pattern89_w11 GFP.TIF	1	2803.07	280		20X_0.8_HeLa_195_w11 GFP Var.TIF		2642.68	314														2766.33	946.561
					20170614_LD_HeLa_Pattern157_w11 GFP.TIF	1	2002.32	706.5		20170614_LD_HeLa_Pattern89_w11 GFP.TIF	2	1829.32	280		20X_0.8_HeLa_195_w11 GFP Var.TIF		3247.28	314														4786.71	63.236
					20170614_LD_HeLa_Pattern157_w11 GFP.TIF	2	2300.89	706.5		20170614_LD_HeLa_Pattern90_w11 GFP.TIF	1	1819.81	280		20X_0.8_HeLa_195_w11 GFP Var.TIF		3023.21	314														2445.03	950.409
					20170614_LD_HeLa_Pattern157_w11 GFP.TIF	3	1735.51	706.5		20170614_LD_HeLa_Pattern90_w11 GFP.TIF	2	2424.17	280		20X_0.8_HeLa_195_w11 GFP Var.TIF		1643.73	314														2392.29	1318.59
					20170614_LD_HeLa_Pattern158_w11 GFP.TIF	1	2580.39	706.5		20170614_LD_HeLa_Pattern90_w11 GFP.TIF	3	2952.93	280		20X_0.8_HeLa_195_w11 GFP Var.TIF		2088.42	314														2118.96	980.363
					20170614_LD_HeLa_Pattern158_w11 GFP.TIF	2	1918.83	706.5		20170614_LD_HeLa_Pattern91_w11 GFP.TIF	1	2395.4	280		20X_0.8_HeLa_196_w11 GFP Var.TIF		3431.3	314														2333.73	648.063
					20170614_LD_HeLa_Pattern158_w11 GFP.TIF	3	1957.1	706.5		20170614_LD_HeLa_Pattern91_w11 GFP.TIF	2	5204.52	280		20X_0.8_HeLa_196_w11 GFP Var.TIF		3524.7	314														1952.53	393.04
					20170614_LD_HeLa_Pattern158_w11 GFP.TIF	4	2278.95	706.5		20170614_LD_HeLa_Pattern92_w11 GFP.TIF	1	4253.9	280		20X_0.8_HeLa_196_w11 GFP Var.TIF		5629.53	314														2957.43	1229.56
					20170614_LD_HeLa_Pattern158_w11 GFP.TIF	5	3480.12	706.5		20170614_LD_HeLa_Pattern93_w11 GFP.TIF	1	2000.1	280		20X_0.8_HeLa_196_w11 GFP Var.TIF		3749.01	314														3319.93	1161.44
					20170614_LD_HeLa_Pattern158_w11 GFP.TIF	6	2362.09	706.5		20170614_LD_HeLa_Pattern95_w11 GFP.TIF	1	3034.1	280		20X_0.8_HeLa_196_w11 GFP Var.TIF		3201.82	314														2831.02	1129.3
					20170614_LD_HeLa_Pattern159_w11 GFP.TIF	1	2880.49	706.5		20170614_LD_HeLa_Pattern96_w11 GFP.TIF	1	2128.44	280		20X_0.8_HeLa_196_w11 GFP Var.TIF		4510.51	314														2410.84	1044.02
					20170614_LD_HeLa_Pattern160_w11 GFP.TIF	1	2578.15	706.5		20170614_LD_HeLa_Pattern96_w11 GFP.TIF	2	2785.59	280		20X_0.8_HeLa_197_w11 GFP Var.TIF		2544.24	314														1720.08	559.97
					20170614_LD_HeLa_Pattern160_w11 GFP.TIF	2	2378.1	706.5		20170614_LD_HeLa_Pattern96_w11 GFP.TIF	3	2963.98	280		20X_0.8_HeLa_197_w11 GFP Var.TIF		1347.62	314														2942.35	1775.6
					20170614_LD_HeLa_Pattern161_w11 GFP.TIF	1	2588.01	706.5		20170614_LD_HeLa_Pattern97_w11 GFP.TIF	1	2292.26	280		20X_0.8_HeLa_197_w11 GFP Var.TIF		4078.45	314														2913.96	1066.38
					20170614_LD_HeLa_Pattern161_w11 GFP.TIF	2	2586.66	706.5		20170614_LD_HeLa_Pattern97_w11 GFP.TIF	2	3784.47	280		20X_0.8_HeLa_197_w11 GFP Var.TIF		1526.41	314														2420.55	877.397
					20170614_LD_HeLa_Pattern161_w11 GFP.TIF	3	3249.71	706.5		20170614_LD_HeLa_Pattern97_w11 GFP.TIF	3	2034.17	280		20X_0.8_HeLa_197_w11 GFP Var.TIF		2129.68	314														2556.52	921.079
					20170614_LD_HeLa_Pattern161_w11 GFP.TIF	4	2553.62	706.5		20170614_LD_HeLa_Pattern97_w11 GFP.TIF	4	1755.05	280		20X_0.8_HeLa_197_w11 GFP Var.TIF		2328.68	314														3120.29	1158.21
					20170614_LD_HeLa_Pattern161_w11 GFP.TIF	5	4518.78	706.5		20170614_LD_HeLa_Pattern98_w11 GFP.TIF	1	2882.51	280		20X_0.8_HeLa_197_w11 GFP Var.TIF		1505.55	314														2615.59	1137.52
					20170614_LD_HeLa_Pattern161_w11 GFP.TIF	6	2864.71	706.5		20170614_LD_HeLa_Pattern98_w11 GFP.TIF	2	4464.17	280		20X_0.8_HeLa_197_w11 GFP Var.TIF		2290.62	314														2935.55	1054.73
					20170614_LD_HeLa_Pattern161_w11 GFP.TIF	7	3057.42	706.5		20170614_LD_HeLa_Pattern98_w11 GFP.TIF	3	2656.71	280		20X_0.8_HeLa_197_w11 GFP Var.TIF		1072.56	314														2863.29	1155.72
					20170614_LD_HeLa_Pattern162_w11 GFP.TIF	1	1842.69	706.5		20170614_LD_HeLa_Pattern98_w11 GFP.TIF	4	2539.56	280		20X_0.8_HeLa_197_w11 GFP Var.TIF		1437.18	314														2110.11	1124.83
					20170614_LD_HeLa_Pattern162_w11 GFP.TIF	2	2079.29	706.5		20170614_LD_HeLa_Pattern99_w11 GFP.TIF	1	3142.01	280		20X_0.8_HeLa_197_w11 GFP Var.TIF		1325.76	314														2537.87	917.231
					20170614_LD_HeLa_Pattern163_w11 GFP.TIF	1	4180.04	706.5		20170614_LD_HeLa_Pattern99_w11 GFP.TIF	2	2438.44	280		20X_0.8_HeLa_197_w11 GFP Var.TIF		1813.72	314														2443.14	1046.41
					20170614_LD_HeLa_Pattern163_w11 GFP.TIF	2	3389.98	706.5							20X_0.8_HeLa_197_w11 GFP Var.TIF		1580.85	314														2970.85	1466.49
					20170614_LD_HeLa_Pattern164_w11 GFP.TIF	1	4763.7	706.5							20X_0.8_HeLa_197_w11 GFP Var.TIF		1503.5	314														2788.42	907.663
					20170614_LD_HeLa_Pattern165_w11 GFP.TIF	1	3025.61	706.5							20X_0.8_HeLa_197_w11 GFP Var.TIF		1565.28	314														2720.13	1093.11
					20170614_LD_HeLa_Pattern165_w11 GFP.TIF	2	2624.48	706.5							20X_0.8_HeLa_198_w11 GFP Var.TIF		916.857	314														2055.31	1140.85
					20170614_LD_HeLa_Pattern165_w11 GFP.TIF	3	2455.35	706.5							20X_0.8_HeLa_198_w11 GFP Var.TIF		1798.24	314														2673.22	1101.11
					20170614_LD_HeLa_Pattern166_w11 GFP.TIF	1	2746.94	706.5							20X_0.8_HeLa_198_w11 GFP Var.TIF		2750.8	314														3323.85	1252.13
					20170614_LD_HeLa_Pattern166_w11 GFP.TIF	2	2937.26	706.5							20X_0.8_HeLa_198_w11 GFP Var.TIF		1551.71	314														3015.63	1559.05
					20170614_LD_HeLa_Pattern166_w11 GFP.TIF	3	2125.82	706.5							20X_0.8_HeLa_198_w11 GFP Var.TIF		3204.85	314														2480.96	979.427
					20170614_LD_HeLa_Pattern167_w11 GFP.TIF	1	2292.47	706.5							20X_0.8_HeLa_198_w11 GFP Var.TIF		2114.23	314														1744.31	579.003
					20170614_LD_HeLa_Pattern167_w11 GFP.TIF	2	1943.28	706.5							20X_0.8_HeLa_198_w11 GFP Var.TIF		1301.79	314														2649.86	1093.11
					20170614_LD_HeLa_Pattern168_w11 GFP.TIF	1	3824.26	706.5							20X_0.8_HeLa_198_w11 GFP Var.TIF		2147.69	314														3069.14	1248.08
					20170614_LD_HeLa_Pattern168_w11 GFP.TIF	2	3792.84	706.5							20X_0.8_HeLa_198_w11 GFP Var.TIF		1776.99	314														3604.38	1265.34
					20170614_LD_HeLa_Pattern168_w11 GFP.TIF	3	3050.73	706.5							20X_0.8_HeLa_198_w11 GFP Var.TIF		1945.72	314														2498.63	972.562
					20170614_LD_HeLa_Pattern169_w11 GFP.TIF	1	3362.66	706.5							20X_0.8_HeLa_198_w11 GFP Var.TIF		2076.22	314														2119.11	641.823
					20170614_LD_HeLa_Pattern171_w11 GFP.TIF	1	1942.88	706.5							20X_0.8_HeLa_198_w11 GFP Var.TIF		1441.62	314														1653.38	1057.43
					20170614_LD_HeLa_Pattern171_w11 GFP.TIF	2	2886.68	706.5							20X_0.8_HeLa_198_w11 GFP Var.TIF		1127.51	314														4156.08	1341.79
					20170614_LD_HeLa_Pattern171_w11 GFP.TIF	3	1822.69	706.5							20X_0.8_HeLa_198_w11 GFP Var.TIF		1244.33	314														2711.1	775.263
					20170614_LD_HeLa_Pattern172_w11 GFP.TIF	1	2732.23	706.5							20X_0.8_HeLa_198_w11 GFP Var.TIF		2281.03	314														2356.52	368.598
					20170614_LD_HeLa_Pattern173_w11 GFP.TIF	1	3015.11	706.5							20X_0.8_HeLa_198_w11 GFP Var.TIF		2908.98	314														3228.43	227.566
					20170614_LD_HeLa_Pattern173_w11 GFP.TIF	2	2750.77	706.5							20X_0.8_HeLa_198_w11 GFP Var.TIF		2322.68	314														3506.69	786.911
					20170614_LD_HeLa_Pattern173_w11 GFP.TIF	3	2448.75	706.5							20X_0.8_HeLa_198_w11 GFP Var.TIF		1407.23	314														2194.46	439.842
					20170614_LD_HeLa_Pattern173_w11 GFP.TIF	4	5089.19	706.5							20X_0.8_HeLa_198_w11 GFP Var.TIF		1803.15	314														2931.01	285.809
					20170614_LD_HeLa_Pattern174_w11 GFP.TIF	1	3717.2	706.5							20X_0.8_HeLa_198_w11 GFP Var.TIF		1732.87	314														2485.22	546.761
					20170614_LD_HeLa_Pattern175_w11 GFP.TIF	1	2536.61	706.5							20X_0.8_HeLa_198_w11 GFP Var.TIF		948.316	314														3361.8	1041.21
					20170614_LD_HeLa_Pattern175_w11 GFP.TIF	2	2168.69	706.5							20X_0.8_HeLa_198_w11 GFP Var.TIF		2333.7	314														1875.04	572.138
					20170614_LD_HeLa_Pattern175_w11 GFP.TIF	3	1870.39	706.5							20X_0.8_HeLa_198_w11 GFP Var.TIF		2016.14	314														2826.23	700.482
					20170614_LD_HeLa_Pattern176_w11 GFP.TIF	1	2715	706.5							20X_0.8_HeLa_198_w11 GFP Var.TIF		1893.26	314														2731.78	570.578
					20170614_LD_HeLa_Pattern176_w11 GFP.TIF	2	3178.11	706.5							20X_0.8_HeLa_198_w11 GFP Var.TIF		1189.05	314														2828.05	888.317
					20170614_LD_HeLa_Pattern177_w11 GFP.TIF	1	3846.84	706.5																								3101.55	769.542
					20170614_LD_HeLa_Pattern178_w11 GFP.TIF	1	2719.25	706.5																								2609.17	513.999
					20170614_LD_HeLa_Pattern178_w11 GFP.TIF	2	2900.19	706.5																								3864.54	1138.35
					20170614_LD_HeLa_Pattern179_w11 GFP.TIF	1	2354.62	706.5																								3892.7	653.887
					20170614_LD_HeLa_Pattern180_w11 GFP.TIF	1	3524.47	706.5																								3467	517.223
					20170614_LD_HeLa_Pattern180_w11 GFP.TIF	2	1770.08	706.5																								2116.16	724.508
					20170614_LD_HeLa_Pattern181_w11 GFP.TIF	1	3366.59	706.5																								3020.13	908.287
					20170614_LD_HeLa_Pattern181_w11 GFP.TIF	2	3961.07	706.5																								3077.27	1025.19
					20170614_LD_HeLa_Pattern182_w11 GFP.TIF	1	4072.97	706.5																								3405.45	1092.17
					20170614_LD_HeLa_Pattern182_w11 GFP.TIF	2	2647.3	706.5																								2913.49	627.054
					20170614_LD_HeLa_Pattern183_w11 GFP.TIF	1	2866.72	706.5																								2437.08	905.478
					20170614_LD_HeLa_Pattern184_w11 GFP.TIF	1	4052.38	706.5																								2659.22	675.001
					20170614_LD_HeLa_Pattern185_w11 GFP.TIF	1	2910.03	706.5																								2995.24	261.368
					20170614_LD_HeLa_Pattern49_w11 GFP.TIF	1	3010.35	706.5																								2328.57	532.304
					20170614_LD_HeLa_Pattern50_w11 GFP.TIF	1	3130.16	706.5																								2351.69	997.42
					20170614_LD_HeLa_Pattern51_w11 GFP.TIF	1	3590.51	706.5																								4672.88	174.314
					20170614_LD_HeLa_Pattern51_w11 GFP.TIF	2	2128.26	706.5																								3457.93	799.704
					20170614_LD_HeLa_Pattern52_w11 GFP.TIF	1	2262.8	706.5																								3883.36	1041.93
					20170614_LD_HeLa_Pattern53_w11 GFP.TIF	1	3265.67	706.5																								4397.51	1569.04
					20170614_LD_HeLa_Pattern56_w11 GFP.TIF	1	4382.96	706.5																								3498.93	878.645
					20170614_LD_HeLa_Pattern57_w11 GFP.TIF	1	2714.83	706.5																								3228.84	763.822
					20170614_LD_HeLa_Pattern57_w11 GFP.TIF	2	3062.53	706.5																								1922.91	169.842
					20170614_LD_HeLa_Pattern58_w11 GFP.TIF	1	1851.96	706.5																								2077.85	467.612
					20170614_LD_HeLa_Pattern59_w11 GFP.TIF	1	3332.3	706.5																								4430.03	1562.49
					20170614_LD_HeLa_Pattern60_w11 GFP.TIF	1	2240.55	706.5																								2970.2	943.753
					20170614_LD_HeLa_Pattern60_w11 GFP.TIF	2	2256.5	706.5																								3083.63	771.83
					20170614_LD_HeLa_Pattern60_w11 GFP.TIF	3	1113.66	706.5																								3874.44	1260.45
					20170614_LD_HeLa_Pattern60_w11 GFP.TIF	4	1321	706.5																								3310.18	557.578
					20170614_LD_HeLa_Pattern60_w11 GFP.TIF	5	2888.15	706.5																								2793.59	943.129
					20170614_LD_HeLa_Pattern61_w11 GFP.TIF	1	2548.13	706.5																								3097.56	630.59
					20170614_LD_HeLa_Pattern63_w11 GFP.TIF	1	2551.6	706.5																								3614.16	950.305
					20170614_LD_HeLa_Pattern64_w11 GFP.TIF	1	2834.82	706.5																								3852.01	1030.18
					20170614_LD_HeLa_Pattern64_w11 GFP.TIF	2	2059	706.5																								2491.74	941.777
					20170614_LD_HeLa_Pattern64_w11 GFP.TIF	3	1495.95	706.5																								4815.57	909.743
					20170614_LD_HeLa_Pattern65_w11 GFP.TIF	1	1617.56	706.5																								3655.56	646.815
					20170614_LD_HeLa_Pattern65_w11 GFP.TIF	2	2057.14	706.5																								1784.7	501.622
					20170614_LD_HeLa_Pattern65_w11 GFP.TIF	3	2575.18	706.5																								2716.95	876.357
					20170614_LD_HeLa_Pattern66_w11 GFP.TIF	1	2368	706.5																								1729.27	727.836
					20170614_LD_HeLa_Pattern67_w11 GFP.TIF	1	2063.79	706.5																								2554.76	896.846
					20170614_LD_HeLa_Pattern67_w11 GFP.TIF	2	1809.48	706.5																								1905.36	1025.81
					20170614_LD_HeLa_Pattern68_w11 GFP.TIF	1	2278.38	706.5																								2268.42	600.948
					20170614_LD_HeLa_Pattern68_w11 GFP.TIF	2	1559.92	706.5																								2072.85	940.112
					20170614_LD_HeLa_Pattern69_w11 GFP.TIF	1	3322.46	706.5																								2018.17	761.638
					20170614_LD_HeLa_Pattern70_w11 GFP.TIF	1	2818.62	706.5																								1804.13	711.403
					20170614_LD_HeLa_Pattern71_w11 GFP.TIF	1	2863.85	706.5
					20170614_LD_HeLa_Pattern71_w11 GFP.TIF	2	2862.06	706.5
					20170614_LD_HeLa_Pattern72_w11 GFP.TIF	1	2531.24	706.5
					20170614_LD_HeLa_Pattern72_w11 GFP.TIF	2	1919.24	706.5
					20170614_LD_HeLa_Pattern73_w11 GFP.TIF	1	2236.37	706.5
					20170614_LD_HeLa_Pattern73_w11 GFP.TIF	2	1822.13	706.5
					20170614_LD_HeLa_Pattern74_w11 GFP.TIF	1	1725.02	706.5
					20170614_LD_HeLa_Pattern74_w11 GFP.TIF	2	2588.23	706.5
					20170614_LD_HeLa_Pattern74_w11 GFP.TIF	3	2939.82	706.5
					20170614_LD_HeLa_Pattern74_w11 GFP.TIF	4	2042.56	706.5
					20170614_LD_HeLa_Pattern75_w11 GFP.TIF	1	3066.67	706.5
					20170614_LD_HeLa_Pattern76_w11 GFP.TIF	1	3420.92	706.5
					20170614_LD_HeLa_Pattern77_w11 GFP.TIF	1	2348.87	706.5
					20170614_LD_HeLa_Pattern78_w11 GFP.TIF	1	3222.04	706.5
					20170614_LD_HeLa_Pattern79_w11 GFP.TIF	1	2226.08	706.5
					20170614_LD_HeLa_Pattern79_w11 GFP.TIF	2	2241.61	706.5
					20170614_LD_HeLa_Pattern79_w11 GFP.TIF	3	1762.6	706.5
					20170614_LD_HeLa_Pattern80_w11 GFP.TIF	1	2295.21	706.5
					20170614_LD_HeLa_Pattern80_w11 GFP.TIF	2	2613.33	706.5
					20170614_LD_HeLa_Pattern81_w11 GFP.TIF	1	2121.51	706.5
					20170614_LD_HeLa_Pattern81_w11 GFP.TIF	2	1971.03	706.5
					20170614_LD_HeLa_Pattern81_w11 GFP.TIF	3	2030.94	706.5
					20170614_LD_HeLa_Pattern82_w11 GFP.TIF	1	3151.99	706.5
					20170614_LD_HeLa_Pattern83_w11 GFP.TIF	1	2818	706.5
					20170614_LD_HeLa_Pattern83_w11 GFP.TIF	2	3190.56	706.5
					20170614_LD_HeLa_Pattern83_w11 GFP.TIF	3	3245.92	706.5
					20170614_LD_HeLa_Pattern83_w11 GFP.TIF	5	2148.3	706.5
					20170614_LD_HeLa_Pattern84_w11 GFP.TIF	1	2722.44	706.5
					p138_w41 GFP.TIF		2033.05	706.5
					p138_w41 GFP.TIF		2175.85	706.5
					p141_w41 GFP.TIF		2084.49	706.5
					p141_w41 GFP.TIF		2079.34	706.5
					p141_w41 GFP.TIF		1729	706.5
					p142_w41 GFP.TIF		2605.61	706.5
					p143_w41 GFP.TIF		2594.24	706.5
					p144_w41 GFP.TIF		1592.34	706.5
					p144_w41 GFP.TIF		2384.82	706.5
					p144_w41 GFP.TIF		917.518	706.5
					p145_w41 GFP.TIF		2843.85	706.5
					p145_w41 GFP.TIF		1867.56	706.5
					p145_w41 GFP.TIF		2401.44	706.5
					p145_w41 GFP.TIF		2118.95	706.5
					p145_w41 GFP.TIF		2039.41	706.5
					p146_w41 GFP.TIF		2631.57	706.5
					p146_w41 GFP.TIF		2916.06	706.5
					p146_w41 GFP.TIF		1295.43	706.5
					p147_w41 GFP-1.tif		4274.5	706.5
					p147_w41 GFP-1.tif		3114.43	706.5
					p148_w41 GFP.TIF		3701.26	706.5
					p148_w41 GFP.TIF		4640.69	706.5
					p148_w41 GFP.TIF		5350.49	706.5
					p148_w41 GFP.TIF		1089.69	706.5
