# Supplementary material for: A mechano-osmotic feedback couples cell volume to the rate of cell deformation
Source: eLife journal article supplement (doi:10.7554/elife.72381), 2022-04-13
Supplement: supp [file waterpermeability.xls]

## Sheet: Sheet1
P/Piso	Total permeability ( 10^{-4} mu^3/Pa.s)	Permeability 10^{-12} m/Pa.s
0.497143	9.08712	1.13589
0.602857	5.6313	0.703913
0.705714	6.08948	0.761185
0.797143	7.98541	0.998176
0.88	6.98562	0.873202
1.14076	0.786341	0.0982927
1.28739	0.749377	0.0936721
1.6305	1.40757	0.175946
1.97654	3.64379	0.455474
2.47507	5.0782	0.634775
5.57771	2.06133	0.257667
Radius R	8 um
Surface area (4 pi R^2)	800 um^2
Volume (4 pi R^3/3)	2145 um^3
permeability	Total Permeability/(Surface Area)
Total permeability	From data
