# Supplementary material for: A mechano-osmotic feedback couples cell volume to the rate of cell deformation
Source: eLife journal article supplement (doi:10.7554/elife.72381), 2022-04-13
Supplement: supp [file With_total_area_controlgrouped_fited_functions.xlsx]

## Sheet: controlgrouped_fitarea
Slow	Normal	Fast
28.0563	28.3318	35.7633
37.32	45.9075	70.8838
46.4387	62.8111	104.016
55.4146	79.0683	135.272
64.2499	94.7037	164.759
72.9469	109.741	192.577
81.5077	124.203	218.819
89.9343	138.113	243.576
98.2291	151.49	266.931
106.394	164.356	288.965
114.431	176.729	309.75
122.342	188.63	329.359
130.129	200.075	347.858
137.794	211.083	365.309
145.34	221.669	381.773
152.767	231.851	397.304
160.077	241.643	411.957
167.274	251.061	425.779
174.357	260.119	438.819
181.33	268.83	451.121
188.193	277.208	462.726
194.949	285.266	473.675
201.6	293.016	484.003
208.146	300.469	493.747
214.589	307.637	502.939
220.932	314.531	511.611
227.175	321.161	519.792
233.32	327.538	527.509
239.37	333.671	534.79
245.324	339.569	541.658
251.185	345.242	548.138
256.955	350.698	554.251
262.634	355.945	560.018
268.224	360.992	565.458
273.727	365.845	570.59
279.143	370.513	575.432
284.475	375.002	579.999
289.723	379.32	584.308
294.889	383.473	588.374
299.974	387.466	592.208
304.98	391.307	595.826
309.907	395.001	599.239
314.757	398.554	602.459
319.531	401.971	605.496
324.23	405.257	608.362
328.855	408.418	611.065
333.408	411.458	613.616
337.89	414.381	616.021
342.302	417.193	618.291
346.644	419.897	620.432
350.919	422.498	622.452

## Sheet: controlgrouped_fitvolume
Slow	Normal	Fast
100	100	100
99.9239	99.9035	99.8974
99.8292	99.75	99.6947
99.7178	99.5473	99.4071
99.5919	99.303	99.0502
99.4532	99.0242	98.6397
99.3034	98.7178	98.1903
99.1443	98.3902	97.7161
98.9773	98.0475	97.2293
98.804	97.6952	96.7408
98.6257	97.3387	96.2597
98.4438	96.9826	95.7932
98.2595	96.6314	95.3472
98.0742	96.2889	94.926
97.8888	95.9587	94.5328
97.7045	95.6437	94.1694
97.5224	95.3467	93.8372
97.3434	95.0699	93.5365
97.1684	94.8149	93.2672
96.9984	94.5832	93.0289
96.8341	94.376	92.8206
96.6762	94.1938	92.6414
96.5256	94.0372	92.4899
96.3828	93.9063	92.365
96.2484	93.8009	92.2651
96.1229	93.7207	92.189
96.0069	93.6652	92.1351
95.9007	93.6338	92.1022
95.8047	93.6256	92.0889
95.7193	93.6396	92.094
95.6445	93.6749	92.116
95.5806	93.7303	92.154
95.5278	93.8049	92.2067
95.486	93.8973	92.2731
95.4554	94.0064	92.3522
95.4358	94.131	92.4429
95.4273	94.27	92.5445
95.4295	94.4223	92.656
95.4425	94.5866	92.7767
95.466	94.7619	92.9059
95.4996	94.9472	93.0427
95.5433	95.1415	93.1866
95.5965	95.3437	93.337
95.6591	95.553	93.4932
95.7306	95.7685	93.6548
95.8107	95.9894	93.8212
95.899	96.2148	93.992
95.995	96.4442	94.1667
96.0985	96.6768	94.345
96.2089	96.9119	94.5264
96.3258	97.149	94.7107

## Sheet: controlgrouped_tension_differen
Difference of tension (without voume loss – with volume loss) for finite alpha and alpha = 0
Slow	Normal	Fast
0	0	0
0.0459266	0.0616366	0.06659
0.0944463	0.153813	0.192327
0.143651	0.267922	0.359607
0.192033	0.396077	0.550524
0.238417	0.531204	0.74867
0.281896	0.667118	0.940465
0.321786	0.798553	1.11577
0.357587	0.92117	1.26798
0.388951	1.03154	1.39356
0.415656	1.12712	1.49155
0.437585	1.20615	1.56282
0.454708	1.2676	1.60943
0.467066	1.31109	1.63411
0.474764	1.33678	1.63986
0.477956	1.34527	1.62967
0.476836	1.33751	1.60638
0.471634	1.31475	1.57252
0.462608	1.2784	1.53033
0.450036	1.22998	1.48172
0.434213	1.1711	1.42831
0.415446	1.10335	1.37142
0.39405	1.02831	1.31216
0.370341	0.947458	1.25142
0.344639	0.862215	1.18991
0.317256	0.773896	1.12819
0.288502	0.683676	1.06672
0.258675	0.592623	1.00584
0.228065	0.501684	0.945811
0.196944	0.411677	0.88685
0.165575	0.323311	0.829091
0.134197	0.237182	0.772649
0.103042	0.153783	0.717598
0.0723104	0.073517	0.663972
0.0421949	-0.0033024	0.611805
0.0128619	-0.0764351	0.561106
-0.0155403	-0.14571	0.511859
-0.0428796	-0.211015	0.464067
-0.06905	-0.272292	0.417692
-0.0939555	-0.329522	0.372722
-0.117526	-0.382733	0.329108
-0.139703	-0.431974	0.286838
-0.160446	-0.477334	0.245851
-0.17973	-0.518911	0.206134
-0.197543	-0.556834	0.167633
-0.213887	-0.591218	0.130322
-0.228773	-0.622224	0.0941589
-0.242224	-0.650004	0.0591043
-0.254272	-0.674707	0.02513
-0.264957	-0.696501	-0.00780222
-0.274324	-0.715537	-0.0397237
