# Supplementary material for: A mechano-osmotic feedback couples cell volume to the rate of cell deformation
Source: eLife journal article supplement (doi:10.7554/elife.72381), 2022-04-13
Supplement: supp [file With_total_area_withdrugs_fitted_functions.xlsx]

## Sheet: withdrugs_fitarea
Time (mins)	Exp_contol	New_avg_cont by Larisa	Fit_Control	Exp_Y27	Fit_Y27	Exp_EIPA	Fit_EIPA	Exp_Lat	Fit_Lat	Exp_GdCl3	Fit_GdCl3	Exp_Ck666	Fit_CK666	Exp_CK666+Y27	Fit_CK-666 + Y27	Exp_EIPA+Y27	Fit_ EIPA + Y27
0	30.0578	30.7384	30.0578	32.7323	32.7323	44.9848	44.9848	45.9673	45.9673	48.408	48.408	29.251	29.251	78.5897	78.5897	31.8858	31.8858
1	48.7835	49.4132	47.0474	56.1114	64.9171	73.326	59.7369	64.3359	52.9135	80.5602	79.2782	57.0743	45.9041	111.645	103.865	68.7682	65.8401
2	67.1048	70.2702	63.3946	71.4706	95.8075	89.2804	74.0573	75.5184	59.827	114.58	108.504	67.3836	61.4743	138.885	128.172	98.5119	98.6452
3	72.5815	80.794	79.1237	90.6518	125.456	88.3986	87.9585	85.7998	66.7079	159.182	136.172	65.789	76.0322	175.496	151.548	143.628	130.34
4	90.1116	98.3835	94.2581	143.133	153.911	139.82	101.453	94.3207	73.5565	193.02	162.366	93.771	89.6435	181.526	174.027	188.975	160.962
5	101.336	111.591	108.82	161.489	181.222	141.128	114.552	98.0311	80.3729	250.239	187.165	94.3763	102.37	205.772	195.646	217.067	190.547
6	120.153	135.333	122.832	187.762	207.435	168.589	127.268	91.7782	87.1572	233.665	210.643	123.789	114.268	220.137	216.436	256.96	219.131
7	132.98	153.692	136.313	206.608	232.594	176.206	139.612	110.351	93.9096	278.235	232.87	114.573	125.394		236.429	262.961	246.748
8	153.208	179.769	149.285	248.211	256.74	195.945	151.595	108.057	100.63		253.912	104.988	135.795	248.624	255.656	313.988	273.43
9	169.911	192.514	161.767	289.826	279.916	229.232	163.226	140.466	107.319	333.761	273.834	164.473	145.521	260.657	274.146	339.902	299.209
10	184.283	209.968	173.776	302.381	302.16		174.518	121.063	113.977		292.694		154.614	310.58	291.928	350.397	324.115
11	180.411	214.37	185.332	309.731	323.508		185.479	128.312	120.603	295.69	310.549	217.834	163.116	272.652	309.028	359.341	348.178
12	224.966	252.121	196.45	370.187	343.999		196.119	129	127.198		327.453		171.065	317.279	325.474	446.967	371.427
13	219.941	247.42	207.149	332.113	363.665	245.032	206.447	138.964	133.762		343.456	143.331	178.497	364.989	341.288		393.889
14	241.258	283.898	217.442	436.42	382.54	312.75	216.474	156.091	140.295	386.414	358.607	209.234	185.446	340.543	356.497	443.903	415.59
15	224.522	263.813	227.347	392.528	400.656	205.26	226.207	117.631	146.797	371.06	372.951		191.943	267.088	371.123		436.557
16	272.039	304.829	236.876	394.484	418.044	244.56	235.655	171.011	153.269	406.014	386.53	256.879	198.017	352.113	385.189		456.815
17	234.761	290.363	246.046	436.994	434.732	207.614	244.826	148.924	159.711		399.386		203.697	372.239	398.716		476.387
18	262.702	329.711	254.869	465.458	450.749	226.862	253.729	136.538	166.122		411.557	176.198	209.007	449.177	411.724		495.296
19	300.454	327.19	263.358	575.164	466.122	346.249	262.372	189.623	172.503	450.028	423.08	251.646	213.972		424.234	546.589	513.565
20	314.263	351.97	271.526	453.583	480.876	255.585	270.762	191.381	178.853		433.989		218.615		436.264		531.216
21	300.201	324.084	279.386	524.92	495.037		278.906	24.8788	185.174		444.316		222.955		447.833		548.27
22	303.926	364.024	286.948	594.846	508.629		286.811	241.138	191.466		454.093		227.013		458.96		564.746
23	272.373	325.637	294.224	517.181	521.674	270.809	294.486		197.727		463.35		230.808		469.659		580.664
24	302.024	364.78	301.225	612.413	534.194	285.653	301.935	243.505	203.959	421.907	472.113	299.915	234.355		479.949	579.419	596.044
25	310.214	352.794	307.962		546.211		309.167		210.162		480.409		237.672		489.844		610.904
26	333.288	377.072	314.444	600.081	557.745	298.325	316.187		216.336		488.264	196.821	240.773		499.361		625.26
27	344.793	386.149	320.68	643.487	568.814	312.081	323.001	216.749	222.481		495.7		243.673		508.512		639.13
28	352.668	408.994	326.681	502.974	579.439	333.611	329.616	212.526	228.596		502.739	161.73	246.384	572.856	517.313		652.531
29	354.697	363.144	332.455	683.364	589.636	422.548	336.038	259.453	234.683	540.714	509.404	305.461	248.919		525.777	672.901	665.479
30	319.831	409.357	338.011	586.72	599.423	315.243	342.271		240.742		515.714	180.52	251.289		533.916		677.988
31	309.083	346.939	343.356	616.528	608.816	255.595	348.323	256.771	246.771		521.687		253.505		541.743		690.073
32	385.193	433.64	348.5	709.385	617.832	314.125	354.196		252.773		527.342		255.576		549.271		701.75
33	357.253	384.591	353.449	705.578	626.485	352.772	359.899	277.402	258.746		532.696		257.513		556.51		713.031
34	396.135	439.72	358.21	687.19	634.79		365.434	265.585	264.691		537.765		259.325		563.471	742.206	723.931
35	332.151	384.034	362.792	591.77	642.761		370.807		270.608		542.563		261.018		570.166		734.462
36	366.681	446.154	367.201		650.411		376.023		276.497		547.106	238.833	262.601		576.604		744.636
37	381.46	419.603	371.443	674.012	657.754		381.086		282.359		551.407		264.082		582.796		754.466
38	339.401	444.317	375.524	789.928	664.801	352.234	386.001	308.448	288.193		555.479	231.743	265.466	585.555	588.75		763.963
39	429.654	438.563	379.451	786.403	671.565	459.446	390.772	305.264	294	573.537	559.334	338.364	266.76		594.476	773.796	773.139
40	375.879	457.526	383.23	634.412	678.057	453.571	395.404		299.779		562.983		267.97		599.983		782.004
41	377.241	425.927	386.866		684.288		399.9	314.792	305.531		566.438		269.101		605.279		790.569
42	360.827	459.531	390.364	588.779	690.268	400.06	404.264		311.256		569.709		270.159		610.372		798.844
43	426.668	421.671	393.73	660.206	696.008		408.501		316.954		572.806		271.148		615.269		806.839
44	412.15	459.649	396.969	753.017	701.517		412.613		322.625		575.738	231.171	272.072		619.979	841.577	814.564
45	389.886	445.757	400.085	695.968	706.804		416.606		328.27		578.513		272.937		624.509		822.027
46	353.952	458.806	403.083		711.879		420.481	338.09	333.888		581.141	262.657	273.745		628.864		829.237
47	439.397	463.132	405.968	641.77	716.749		424.243		339.479		583.628		274.501		633.053		836.204
48	439.397	500.305	408.744		721.424	418.72	427.895		345.045		585.984	260.892	275.207	625.545	637.082		842.934
49	407.053	437.176	411.415	724.716	725.911	517.415	431.44	347.745	350.584	580.29	588.213	394.14	275.868		640.956	850.366	849.437
50	407.053	433.161	413.986	766.283	730.217		434.881		356.097		590.324		276.486		644.681		855.72

## Sheet: fitvolume
Control	Y27	EIPA	Lat	GdCl3	CK666	CK-666 + Y27	EIPA + Y27
100	100	100	100	100	100	100	100
99.9064	99.6726	99.8846	99.8832	99.8134	99.8932	99.9212	100.032
99.7627	99.132	99.7392	99.7736	99.5229	99.7324	99.8129	100.043
99.5763	98.4041	99.5688	99.6701	99.1449	99.5287	99.6808	100.04
99.3539	97.5154	99.3781	99.572	98.6959	99.2921	99.5305	100.026
99.1019	96.4927	99.1717	99.4786	98.1923	99.0316	99.3673	100.008
98.8264	95.3635	98.9537	99.3892	97.6495	98.7548	99.1963	99.9901
98.5331	94.1557	98.7281	99.3035	97.0823	98.4688	99.0222	99.9753
98.2271	92.8974	98.4986	99.221	96.5037	98.1792	98.8491	99.9669
97.9134	91.6166	98.2686	99.1415	95.9255	97.8911	98.6808	99.9669
97.5966	90.3405	98.0412	99.0649	95.3575	97.6087	98.5204	99.9769
97.2807	89.095	97.8192	98.9909	94.8082	97.3356	98.3705	99.9977
96.9694	87.9036	97.6053	98.9195	94.284	97.0744	98.2333	100.03
96.6663	86.7874	97.4017	98.8506	93.7901	96.8276	98.1102	100.073
96.3741	85.7637	97.2104	98.7843	93.3304	96.5969	98.0025	100.126
96.0956	84.8466	97.0331	98.7206	92.9073	96.3837	97.9109	100.19
95.8331	84.0459	96.8712	98.6595	92.5225	96.1887	97.8359	100.262
95.5883	83.3678	96.7258	98.6011	92.1766	96.0127	97.7775	100.343
95.3629	82.8148	96.5979	98.5455	91.8698	95.856	97.7355	100.43
95.1581	82.3864	96.4881	98.4928	91.6014	95.7186	97.7097	100.523
94.9749	82.0793	96.3968	98.4431	91.3705	95.6004	97.6996	100.621
94.814	81.888	96.3241	98.3966	91.176	95.501	97.7045	100.723
94.6756	81.8055	96.2701	98.3535	91.0163	95.4201	97.7238	100.828
94.5601	81.8236	96.2346	98.3138	90.8898	95.3572	97.7567	100.936
94.4673	81.9334	96.2173	98.2776	90.7948	95.3115	97.8024	101.046
94.3971	82.1256	96.2175	98.2452	90.7296	95.2824	97.86	101.157
94.349	82.3911	96.2348	98.2166	90.6922	95.2691	97.9287	101.27
94.3226	82.7208	96.2685	98.192	90.681	95.2709	98.0078	101.382
94.317	83.1061	96.3178	98.1714	90.6942	95.287	98.0964	101.495
94.3316	83.5386	96.3818	98.1551	90.7302	95.3166	98.1937	101.608
94.3655	84.011	96.4597	98.143	90.7872	95.3588	98.2989	101.721
94.4178	84.516	96.5506	98.1353	90.8637	95.413	98.4114	101.833
94.4875	85.0474	96.6536	98.132	90.9582	95.4783	98.5304	101.945
94.5737	85.5993	96.7677	98.1332	91.0692	95.554	98.6553	102.056
94.6753	86.1668	96.8921	98.139	91.1955	95.6393	98.7855	102.166
94.7912	86.745	97.0258	98.1493	91.3357	95.7336	98.9204	102.275
94.9206	87.3302	97.168	98.1641	91.4886	95.8361	99.0595	102.384
95.0622	87.9186	97.3179	98.1835	91.6531	95.9463	99.2022	102.492
95.2152	88.5073	97.4745	98.2075	91.8282	96.0634	99.3481	102.599
95.3786	89.0937	97.6372	98.2359	92.0128	96.187	99.4967	102.705
95.5514	89.6754	97.8052	98.2688	92.206	96.3164	99.6477	102.81
95.7327	90.2506	97.9778	98.3061	92.4069	96.4511	99.8006	102.914
95.9216	90.8176	98.1544	98.3478	92.6147	96.5906	99.9551	103.017
96.1174	91.3753	98.3343	98.3936	92.8287	96.7344	100.111	103.12
96.3191	91.9225	98.517	98.4436	93.0481	96.8822	100.268	103.222
96.5261	92.4583	98.702	98.4976	93.2723	97.0334	100.425	103.323
96.7375	92.9821	98.8887	98.5556	93.5007	97.1878	100.583	103.423
96.9529	93.4934	99.0767	98.6173	93.7327	97.3449	100.742	103.522
97.1715	93.9918	99.2657	98.6827	93.9678	97.5043	100.9	103.621
97.3927	94.4772	99.4552	98.7516	94.2055	97.6659	101.058	103.719
97.616	94.9494	99.6449	98.8239	94.4453	97.8293	101.216	103.817

## Sheet: tension_diff
For fixed k = 100 we calculate the difference between the tension for finite alpha and alpha = 0
Control	Y27	EIPA	Lat	GdCl3	CK666	CK-666 + Y27	EIPA + Y27
0	0	0	0	0	0	0
0.0596554	0.204507	0.0716414	0.0603856	0.119704	0.0694676	0.0490475	-0.0187795
0.14525	0.509689	0.152575	0.0929355	0.295433	0.170434	0.110952	-0.0209202
0.249127	0.876359	0.237805	0.109078	0.507774	0.293433	0.17962	-0.0137729
0.364397	1.26748	0.323066	0.115656	0.73793	0.430171	0.249591	-0.00294285
0.484979	1.64981	0.404801	0.116746	0.969183	0.573573	0.316256	0.00757178
0.605613	1.99535	0.480122	0.114754	1.18793	0.71778	0.376012	0.0152657
0.721865	2.28243	0.546787	0.111086	1.3841	0.858075	0.426284	0.0188883
0.83011	2.49627	0.603149	0.106549	1.55118	0.990788	0.465516	0.0181865
0.927503	2.62895	0.64811	0.101595	1.68581	1.11319	0.493005	0.0136191
1.01192	2.67889	0.68106	0.0964616	1.78719	1.22334	0.508786	0.00602624
1.0819	2.64993	0.701828	0.0912711	1.85647	1.32001	0.513466	-0.00351407
1.13657	2.55006	0.710617	0.0860741	1.89608	1.40249	0.508033	-0.013978
1.17558	2.39013	0.707946	0.0808846	1.90923	1.47056	0.493717	-0.0244602
1.19906	2.18249	0.69456	0.0756984	1.89946	1.52435	0.47186	-0.0342691
1.20748	1.93994	0.671428	0.0705033	1.87037	1.56426	0.443832	-0.0429191
1.20159	1.67473	0.639632	0.0652856	1.82539	1.59088	0.410951	-0.050093
1.18241	1.39797	0.600337	0.0600334	1.76766	1.60497	0.374442	-0.0556736
1.15109	1.11921	0.554754	0.0547384	1.69998	1.60734	0.335408	-0.0596707
1.10891	0.84626	0.504095	0.0493965	1.62477	1.5989	0.29481	-0.0621783
1.05721	0.585191	0.449535	0.0440081	1.5441	1.58055	0.253472	-0.0633566
0.997336	0.340449	0.392191	0.0385777	1.45971	1.55322	0.212083	-0.0633845
0.930632	0.115034	0.333105	0.0331141	1.37303	1.51779	0.171209	-0.062467
0.858393	-0.0892688	0.273231	0.0276291	1.28522	1.47515	0.131284	-0.0607972
0.781856	-0.271672	0.213419	0.0221377	1.19725	1.42613	0.0926953	-0.0585525
0.702166	-0.432159	0.154411	0.0166575	1.10986	1.3715	0.0556832	-0.0558936
0.620391	-0.571305	0.0968533	0.0112077	1.02364	1.31202	0.0204422	-0.052963
0.5375	-0.690097	0.0412815	0.00580892	0.93905	1.24836	-0.0128873	-0.0498764
0.454351	-0.789806	-0.0118673	0.000482837	0.856437	1.18117	-0.0442317	-0.0467311
0.37172	-0.871885	-0.0622432	-0.0047486	0.776061	1.11103	-0.0735496	-0.0435947
0.290267	-0.93787	-0.109588	-0.0098634	0.6981	1.0385	-0.100837	-0.0405312
0.21057	-0.989329	-0.153717	-0.0148399	0.622683	0.964052	-0.126115	-0.0375907
0.133114	-1.02778	-0.194512	-0.0196575	0.549889	0.88815	-0.149427	-0.0347956
0.0582977	-1.05471	-0.231921	-0.0242964	0.479746	0.811203	-0.17083	-0.0321672
-0.0135515	-1.07152	-0.265938	-0.0287386	0.412275	0.733577	-0.190397	-0.0297233
-0.0821778	-1.07953	-0.296601	-0.0329673	0.347454	0.655608	-0.208201	-0.0274668
-0.147391	-1.07994	-0.323991	-0.0369684	0.285255	0.577598	-0.224332	-0.0253954
-0.209055	-1.07385	-0.348207	-0.0407285	0.225629	0.499814	-0.238867	-0.0235085
-0.26708	-1.06226	-0.369384	-0.0442379	0.168511	0.422495	-0.251915	-0.0218007
-0.321431	-1.04607	-0.387661	-0.0474874	0.11386	0.345858	-0.263545	-0.0202605
-0.372093	-1.02608	-0.403209	-0.0504722	0.0615763	0.270086	-0.273861	-0.0188815
-0.419102	-1.00301	-0.416182	-0.0531877	0.0116138	0.195352	-0.282939	-0.0176507
-0.462506	-0.97747	-0.426766	-0.0556325	-0.0361238	0.121796	-0.290871	-0.0165577
-0.502388	-0.950027	-0.435125	-0.0578068	-0.0816967	0.0495487	-0.297734	-0.0155931
-0.53884	-0.921162	-0.441442	-0.0597135	-0.125196	-0.0212834	-0.303606	-0.014745
-0.571977	-0.891287	-0.445883	-0.0613564	-0.166681	-0.0906036	-0.308565	-0.0140035
-0.601919	-0.860767	-0.448616	-0.062742	-0.206245	-0.158334	-0.312679	-0.0133591
-0.6288	-0.829907	-0.449806	-0.0638775	-0.243942	-0.224407	-0.316016	-0.0128024
-0.652759	-0.798969	-0.449599	-0.0647719	-0.279858	-0.288769	-0.318646	-0.0123249
-0.673937	-0.76818	-0.448152	-0.0654352	-0.314056	-0.351374	-0.320619	-0.0119187
-0.692482	-0.737719	-0.445594	-0.0658783	-0.346604	-0.41219	-0.321984	-0.0115765
