# Supplementary material for: A mechano-osmotic feedback couples cell volume to the rate of cell deformation
Source: eLife journal article supplement (doi:10.7554/elife.72381), 2022-04-13
Supplement: supp [file Y27_dVdt_dAdt.xlsx]

## Sheet: Sheet1
exp	pos	cell	Vi	t of V loss	deltaV% at t of V loss		A at t of V loss	t of 90	deltaV% at t of 90	deltaS% at t of 90	A at 90	dV/dt i	dA/dt i																									7.31452	5.6245
20180220 hela spreading 20xPA FN RICM 60min inc Y27 100uM	1	1	2247.62	27	16.4055	-16.4055	658.984	10	8.60951	1.93366	208.117	-17.9873	20.1016
20180220 hela spreading 20xPA FN RICM 60min inc Y27 100uM	1	3	1470.5	13	16.2188	-16.2188	397.096	6	10.9961	0.70811	159.338	-21.2887	25.7636
20180220 hela spreading 20xPA FN RICM 60min inc Y27 100uM	1	4	2818.32	17	16.1145	-16.1145	449.411	7	11.2992	3.02144	278.945	-31.0829	46.4908
20180220 hela spreading 20xPA FN RICM 60min inc Y27 100uM	1	5	1680.36	21	7.72631	-7.72631	531.264	7	5.61634	2.50895	156.945	-7.20315	25.6044
20180220 hela spreading 20xPA FN RICM 60min inc Y27 100uM	2	1	2066.08	12	20.0108	-20.0108	105.566	17	19.9469	-5.93351	188.875	-33.6789	9.41083
20180220 hela spreading 20xPA FN RICM 60min inc Y27 100uM	2	2	2069.34	14	32.232	-32.232	520.031	8	25.9854	-6.61871	221.013	-50.2521	29.3178
20180220 hela spreading 20xPA FN RICM 60min inc Y27 100uM	2	3	2591.99	8	5.96683	-5.96683	55.019	53	3.12782	10.7152	296.314	-10.8865	10.6605
20180220 hela spreading 20xPA FN RICM 60min inc Y27 100uM	2	5	1588.35	10	26.2297	-26.2297	312.539	7	22.4692	1.24359	225.486	-37.3879	45.4577
20180220 hela spreading 20xPA FN RICM 60min inc Y27 100uM	2	6	1679.81	10	28.8946	-28.8946	302.97	11	28.7518	9.98518	302.97	-39.9556	16.6942
20180220 hela spreading 20xPA FN RICM 60min inc Y27 100uM	3	1	1632.82	17	25.0614	-25.0614	599.96	4	13.2712	3.84676	210.197	-32.082	38.7285
20180220 hela spreading 20xPA FN RICM 60min inc Y27 100uM	3	2	1513.14	10	17.1198	-17.1198	189.707	10	17.1198	0.197106	189.707	-19.7747	33.5732
20180220 hela spreading 20xPA FN RICM 60min inc Y27 100uM	3	3	2704.62	12	37.4984	-37.4984	349.877	6	29.2407	-9.36009	256.583	-96.5356	26.923
20180220 hela spreading 20xPA FN RICM 60min inc Y27 100uM	3	4	3116.4	15	9.54866	-9.54866	668.032	7	5.7789	6.91936	306.09	-20.7781	46.4787
20180220 hela spreading 20xPA FN RICM 60min inc Y27 100uM	3	6	1107.05	12	22.5622	-22.5622	224.445	9	20.3311	0.592531	167.346	-18.5203	14.4717
20180220 hela spreading 20xPA FN RICM 60min inc Y27 100uM	4	1	2273.34	24	6.39808	-6.39808	624.038	4	2.30552	7.7395	233.702	-13.7312	37.3628
20180220 hela spreading 20xPA FN RICM 60min inc Y27 100uM	4	2	2739.29	12	18.7921	-18.7921	248.991	12	18.7921	-3.59875	248.991	-35.2968	12.2372
20180220 hela spreading 20xPA FN RICM 60min inc Y27 100uM	4	3	1737.45	21	19.6733	-19.6733	637.662	5	9.72694	1.09477	173.794	-26.5505	34.5977
20180220 hela spreading 20xPA FN RICM 60min inc Y27 100uM	4	4	2222.97	16	15.7642	-15.7642	513.791	4	4.744	5.77456	224.445	-32.0019	41.1317
20180220 hela spreading 20xPA FN RICM 60min inc Y27 100uM	5	1	1883.63	18	25.2743	-25.2743	269.792	15	24.4235	-0.0150218	251.591	-34.0862	3.93474
20180220 hela spreading 20xPA FN RICM 60min inc Y27 100uM	5	2	2132.18	21	10.0548	-10.0548	554.769	8	6.64604	1.33724	176.603	-16.745	30.8379
20180220 hela spreading 20xPA FN RICM 60min inc Y27 100uM	5	4	1443	11	27.6034	-27.6034	243.479	10	27.0691	4.52326	243.479	-28.4106	28.8841
20180220 hela spreading 20xPA FN RICM 60min inc Y27 100uM	5	9	2523.36	14	20.1486	-20.1486	246.495	13	19.6379	-3.20067	246.495
20180220 hela spreading 20xPA FN RICM 60min inc Y27 100uM	1	2	2123.75	38	5.46288	-5.46288	416.129	9	-0.356033	10.4685	236.094	-0.428423	23.015
20180220 hela spreading 20xPA FN RICM 60min inc Y27 100uM	2	4	1752.66	26	8.29833	-8.29833	287.577	8	2.90901	10.0353	221.325	-7.01307	18.3571
20180220 hela spreading 20xPA FN RICM 60min inc Y27 100uM	5	8	2032.15					8	-1.48671	12.5191	243.583	2.82157	35.1957
20180308 HeLa RICM 20xPA Y27 100uM 30min	1	1	1543.45	16	16.5602	-16.5602	472.604	9	13.2982	2.667	193.556	-15.8917	29.9909
20180308 HeLa RICM 20xPA Y27 100uM 30min	1	3	2164.87	27	7.43174	-7.43174	880.309	11	2.83744	8.10148	233.91	-2.63934	26.2096
20180308 HeLa RICM 20xPA Y27 100uM 30min	1	4	1367.63	20	19.8646	-19.8646	349.461	11	14.8705	-1.96199	149.769	-16.9448	7.85247
20180308 HeLa RICM 20xPA Y27 100uM 30min	1	5	1755.23	26	17.6574	-17.6574	427.414	14	12.4624	3.13673	210.613	-15.2263	3.69222
20180308 HeLa RICM 20xPA Y27 100uM 30min	2	2	1381.78	27	19.7832	-19.7832	344.053	12	13.0021	-2.3728	135.936	-15.1243	19.8652
20180308 HeLa RICM 20xPA Y27 100uM 30min	2	3	1803.22	29	15.8038	-15.8038	893.726	5	4.04376	9.14372	223.509	-12.3487	42.7737
20180308 HeLa RICM 20xPA Y27 100uM 30min	2	5	1738.19	22	12.7543	-12.7543	467.82	7	4.92821	7.49223	208.013	-11.5333	30.9824
20180308 HeLa RICM 20xPA Y27 100uM 30min	2	6	1178.33	13	10.7134	-10.7134	432.354	5	2.69375	7.76645	152.785	-10.7112	44.1989
20180308 HeLa RICM 20xPA Y27 100uM 30min	2	7	1843.63	19	15.1601	-15.1601	381.911	10	9.86005	-0.0529677	168.49	-16.1992	52.7832
20180308 HeLa RICM 20xPA Y27 100uM 30min	2	8	1065.54	18	5.80477	-5.80477	390.959	7	-0.249809	10.2663	148.105	-3.60846	47.6245
20180308 HeLa RICM 20xPA Y27 100uM 30min	2	9	805.974	17	28.043	-28.043	601.988	5	10.1889	5.44786	130.216	-15.652	47.9425
20180308 HeLa RICM 20xPA Y27 100uM 30min	3	1	1965.57	29	13.7902	-13.7902	605.628	9	6.30813	4.9866	208.533	-11.7411	45.6067
20180308 HeLa RICM 20xPA Y27 100uM 30min	3	3	1420.87	19	24.7349	-24.7349	476.245	7	20.6562	1.3167	203.436	-24.1673	42.3429
20180308 HeLa RICM 20xPA Y27 100uM 30min	3	4	1436.06	22	13.5437	-13.5437	403.752	10	3.63259	6.51172	168.282	-4.37539	28.9464
20180308 HeLa RICM 20xPA Y27 100uM 30min	3	5	1585.77	29	10.9248	-10.9248	877.501	5	1.17	9.8331	196.676	-4.41289	45.7711
20180308 HeLa RICM 20xPA Y27 100uM 30min	3	6	2014.89	29	3.39877	-3.39877	432.354	20	1.93226	26.56	365.582
20180308 HeLa RICM 20xPA Y27 100uM 30min	4	1	2115.57	29	10.272	-10.272	1362.17	10	1.18022	8.49947	223.717	0.546886	23.3425
20180308 HeLa RICM 20xPA Y27 100uM 30min	4	2	1806.42	28	16.9415	-16.9415	513.687	8	9.80622	6.51913	230.166	-20.1015	33.0292
20180308 HeLa RICM 20xPA Y27 100uM 30min	4	3	1921.32	27	14.0221	-14.0221	678.017	8	7.45313	4.42127	206.764	-15.6619	25.924
20180308 HeLa RICM 20xPA Y27 100uM 30min	4	4	1906.74	22	19.3331	-19.3331	404.792	13	13.9247	1.26467	213.421	-17.5286	11.801
20180308 HeLa RICM 20xPA Y27 100uM 30min	4	5	1520.47	29	23.9384	-23.9384	561.53	6	16.6739	0.536361	190.851	-19.2459	37.7654
20180308 HeLa RICM 20xPA Y27 100uM 30min	4	6	1753.94	21	31.186	-31.186	698.818	5	22.5907	4.90337	265.32	-41.1572	52.9947
20180308 HeLa RICM 20xPA Y27 100uM 30min	5	1	1295.85	10	20.6734	-20.6734	634.75	3	9.85646	1.73655	149.145	-22.3122	69.9313
20180308 HeLa RICM 20xPA Y27 100uM 30min	5	2	1359.69	29	10.2111	-10.2111	425.074	12	6.94077	0.405291	122.623	-5.56645	30.6818
20180308 HeLa RICM 20xPA Y27 100uM 30min	5	3	2004.96	22	20.8567	-20.8567	760.91	2	3.27089	4.89416	188.459	-27.9222	32.0472
20180308 HeLa RICM 20xPA Y27 100uM 30min	5	4	2347.11	29	6.98388	-6.98388	527.104	15	4.60787	8.7129	239.422
20180308 HeLa RICM 20xPA Y27 100uM 30min	5	5	2333.81	10	27.5582	-27.5582	424.658	2	10.7352	5.47176	268.024	-54.7849	25.1418
20180308 HeLa RICM 20xPA Y27 100uM 30min	5	6	1483.8	15	27.2569	-27.2569	419.665	6	23.5596	-4.4228	182.115	-27.0526	24.9254
20180308 HeLa RICM 20xPA Y27 100uM 30min	5	7	1760.3	19	14.4462	-14.4462	855.971	2	2.95301	8.05123	203.956	-16.8987	42.1036
20180308 HeLa RICM 20xPA Y27 100uM 30min	6	1	2404.98	29	8.03027	-8.03027	461.788	17	4.76884	4.91452	225.694	-6.07084	21.0613
20180308 HeLa RICM 20xPA Y27 100uM 30min	6	3	1021.33	20	16.5676	-16.5676	552.065	2	1.11837	10.6016	151.433	-13.3174	22.5139
20180308 HeLa RICM 20xPA Y27 100uM 30min	6	4	1551.24	8	35.0603	-35.0603	405.104	2	11.8911	13.7447	262.928	-48.8235	37.3843
20180308 HeLa RICM 20xPA Y27 100uM 30min	6	5	1755.43	29	7.99778	-7.99778	657.007	6	2.78488	11.5052	233.494	-5.41897	33.9174
20180308 HeLa RICM 20xPA Y27 100uM 30min	6	6	1484.7	26	13.5992	-13.5992	385.239	11	7.96401	4.3743	176.395	-10.4912	18.2902
20180308 HeLa RICM 20xPA Y27 100uM 30min	7	1	1665.96	28	11.8474	-11.8474	559.97	12	4.95026	6.99051	197.82	-7.59836	18.0117
20180308 HeLa RICM 20xPA Y27 100uM 30min	7	2	1575.06	28	15.9017	-15.9017	363.502	12	9.54542	8.00545	219.973	-13.2072	14.5938
20180308 HeLa RICM 20xPA Y27 100uM 30min	7	3	2332.46	28	12.3713	-12.3713	484.149	12	9.8174	9.75842	303.178	-20.5144	21.4773
20180308 HeLa RICM 20xPA Y27 100uM 30min	8	1	1481.92	25	8.74938	-8.74938	488.621	7	2.05364	7.24034	488.621	-5.93224	23.5275
20180308 HeLa RICM 20xPA Y27 100uM 30min	8	2	2003.6	15	7.53826	-7.53826	736.052	5	0.0573894	9.0749	214.669	-11.8277	50.6901
20180308 HeLa RICM 20xPA Y27 100uM 30min	8	3	1118.24	26	19.9457	-19.9457	467.404	5	7.77252	4.81572	148.313	-12.291	17.5594
20180308 HeLa RICM 20xPA Y27 100uM 30min	8	4	1241.34	15	8.49178	-8.49178	419.249	7	4.4342	7.9863	167.658	-7.97068	27.683
20180308 HeLa RICM 20xPA Y27 100uM 30min	8	5	1390.58	17	3.5258	-3.5258	235.886	9	1.69507	6.76344	156.321	-2.67539	16.2213
20180308 HeLa RICM 20xPA Y27 100uM 30min	8	6	1341.04	20	8.00315	-8.00315	472.708	6	1.0308	11.7339	189.603	-3.78747	28.3244
20180308 HeLa RICM 20xPA Y27 100uM 30min	8	8	1528.31	14	26.7115	-26.7115	273.64	9	21.8441	-5.41769	169.634	-33.2811	18.1822
20180308 HeLa RICM 20xPA Y27 100uM 30min	8	9	1968.48	15	2.99887	-2.99887	753.941	6	-0.896028	13.9001	254.711	-4.29267	43.7671
20180308 HeLa RICM 20xPA Y27 100uM 30min	9	1	1656.13	11	18.523	-18.523	396.576	5	13.7691	1.26232	193.452	-19.6998	33.3362
20180308 HeLa RICM 20xPA Y27 100uM 30min	9	2	1640.57	12	22.4447	-22.4447	401.568	5	15.4221	2.23344	208.221	-29.0442	35.4611
20180308 HeLa RICM 20xPA Y27 100uM 30min	9	3	2724.35	23	17.3594	-17.3594	789.407	7	12.5967	0.00431814	244.415	-20.2335	34.6375
20180308 HeLa RICM 20xPA Y27 100uM 30min	9	4	1173.63	23	6.41089	-6.41089	513.583	8	0.804109	29.4694	265.528	-3.82414	33.732
20180308 HeLa RICM 20xPA Y27 100uM 30min	9	5	1178.79	26	10.67	-10.67	539.48	3	3.38949	5.00202	133.856	-5.61994	29.7288
20180308 HeLa RICM 20xPA Y27 100uM 30min	9	6	1604.4	29	14.2831	-14.2831	647.127	3	2.33212	7.03202	178.579	-7.59279	44.6225
20180308 HeLa RICM 20xPA Y27 100uM 30min	9	7	1209.06	11	21.2925	-21.2925	267.92	7	17.4406	1.73869	174.21	-16.1553	37.4616
20180308 HeLa RICM 20xPA Y27 100uM 30min	10	1	1401.85	21	17.7953	-17.7953	567.354	5	5.84126	6.17195	174.002	-16.2949	23.8393
20180308 HeLa RICM 20xPA Y27 100uM 30min	10	2	1929.27	28	9.173	-9.173	630.486	7	2.97848	4.81532	180.451	-7.79179	30.586
20180308 HeLa RICM 20xPA Y27 100uM 30min	10	3	1410.72	11	19.5249	-19.5249	384.095	3	13.9603	3.05204	187.939	-13.0496	24.3912
20180308 HeLa RICM 20xPA Y27 100uM 30min	10	4	2735.84	29	13.2026	-13.2026	1613.03	4	4.58296	4.13259	232.662	-15.1344	43.6788
20180308 HeLa RICM 20xPA Y27 100uM 30min	10	5	1238.58	27	12.2548	-12.2548	430.95	8	3.31053	6.46406	150.497	-4.8938	25.3959
20180308 HeLa RICM 20xPA Y27 100uM 30min	11	1	2424.38	3	2.56562	-2.56562	50.339	10	-1.44142	8.77013	227.774	8.95748	22.6091
20180308 HeLa RICM 20xPA Y27 100uM 30min	11	2	1925.07	22	9.50755	-9.50755	535.32	6	0.273532	10.8431	228.606	-6.50797	39.0886
20180308 HeLa RICM 20xPA Y27 100uM 30min	11	3	1950.21	17	16.547	-16.547	481.653	5	11.0571	6.39722	247.431	-19.5048	25.0157
20180308 HeLa RICM 20xPA Y27 100uM 30min	11	4	2416.79	27	7.23753	-7.23753	703.498	6	2.29815	10.2642	272.808	0.268267	40.0699
20180308 HeLa RICM 20xPA Y27 100uM 30min	11	5	1322.21	9	30.7213	-30.7213	479.677	2	15.7641	2.06435	180.555	-28.9874	46.7882
20180308 HeLa RICM 20xPA Y27 100uM 30min	11	6	1035.79	10	23.8908	-23.8908	423.201	1	7.13611	12.5927	183.363	-15.4445	25.4267
20180308 HeLa RICM 20xPA Y27 100uM 30min	11	8	1294.18	19	25.2237	-25.2237	454.351	4	14.5095	-0.00373737	158.09	-20.7056	34.4658
20180517_y27100uM 60min	4	1	1565.07	13	9.50702	-9.50702	656.175	5	2.74473	19.5589	270.936	-14.5241	72.5259
20180517_y27100uM 60min	4	3	1394.2	13	7.96245	-7.96245	500.374	4	2.07758	12.2994	203.02	-8.00645	34.2187
20180517_y27100uM 60min	4	4	1468.69	12	14.4471	-14.4471	459.135	3	5.16722	13.6043	230.998	-21.2119	45.1526
20180517_y27100uM 60min	4	6	1724.01	29	15.3251	-15.3251	747.285	5	4.20639	13.4147	251.799	-15.8081	56.1927
20180517_y27100uM 60min	4	8	1242.14	9	7.95979	-7.95979	444.419	5	0.0740304	18.9932	221.637	-10.7551	48.2083
20180517_y27100uM 60min	4	9	1617.24	14	9.07102	-9.07102	633.606	7	4.89684	22.0776	298.498	-13.3188	38.7956
20180517_y27100uM 60min	4	10	1216.69	11	37.9066	-37.9066	419.977	5	32.9259	3.24742	224.758	-42.0446	43.4607
20180517_y27100uM 60min	4	11	1175.22	8	13.0138	-13.0138	507.446	2	4.28144	21.1283	235.366	-15.9793	54.602
20180517_y27100uM 60min	5	4	1973.99	20	14.3195	-14.3195	1036.21	3	1.95536	12.7302	259.184	-12.9854	62.4312
20180517_y27100uM 60min	5	6	1104.29	9	13.6579	-13.6579	508.799	3	7.38161	22.5296	238.694	-14.2596	62.1014
20180517_y27100uM 60min	5	8	1735.09	19	13.0274	-13.0274	829.034	3	2.36743	12.6051	238.694	-18.4615	39.4676
20180517_y27100uM 60min	7	1	1358.68	17	4.64865	-4.64865	314.982	8	1.11574	14.5546	211.133	-2.50254	28.4078
20180517_y27100uM 60min	7	2	920.165	8	13.4922	-13.4922	298.186	2	5.71106	23.2442	211.133	-11.8867	31.0245
20180517_y27100uM 60min	7	3	1208.1	11	9.98998	-9.98998	463.14	3	2.33139	18.4408	221.013	-11.8508	39.1366
20180517_y27100uM 60min	9	2	1274.06	12	6.85546	-6.85546	355.805	3	1.03707	17.8377	221.741	-8.61106	32.1904
20180517_y27100uM 60min	9	4	3016.29	20	11.8627	-11.8627	866.476	3	0.524394	13.128	338.956	-12.4099	42.6548
20180517_y27100uM 60min	10	2	1291.1	22	20.3765	-20.3765	441.091	4	7.64497	13.5859	219.661	-17.2402	43.9131
20180517_y27100uM 60min	10	3	1887.28	26	9.21747	-9.21747	506.094	13	5.98849	17.1825	302.138	-8.06006	11.2424
20180517_y27100uM 60min	11	1	1355.92					20	-2.9051	22.8316	248.263	3.42697	5.67565
20180517_y27100uM 60min	11	2	1314.54					11	-5.82079	23.2495	236.926	8.27611	11.7342
20180517_y27100uM 60min	11	4	1801.45	16	12.5928	-12.5928	585.867	4	5.38633	17.8814	295.482	-19.7541	47.6788
20180517_y27100uM 60min	11	5	2303.43	35	10.868	-10.868	1575.75	5	-0.450421	18.9097	331.468	-13.4547	74.9762
20180517_y27100uM 60min	12	1	2417.61	23	7.8832	-7.8832	1105.9	7	0.591746	16.5995	326.58	-0.60558	42.6229
20180517_y27100uM 60min	12	2	1686.08	16	7.81918	-7.81918	801.628	6	1.53882	17.7229	268.336	-8.9417	46.8523
20180517_y27100uM 60min	12	3	1870.62	12	12.6733	-12.6733	753.317	2	3.07633	10.1613	233.182	-23.5798	76.3239
20180517_y27100uM 60min	12	4	1563.96	11	13.2598	-13.2598	426.218	4	7.22276	15.5514	260.536	-20.3929	35.4107
20180517_y27100uM 60min	12	5	1479.82	7	15.4119	-15.4119	507.967	2	7.32449	13.8751	241.295	-20.7273	63.1179
20180517_y27100uM 60min	12	7	3841.83	28	10.236	-10.236	1128.68	6	1.26581	12.1954	391.064	-8.43648	78.518
20180517_y27100uM 60min 1	6	1	2018.5					5	-0.80378	17.1294	287.681	11.1765	39.0077
20180517_y27100uM 60min 1	6	5	1702.77	27	11.7073	-11.7073	535.372	7	6.91486	10.614	240.15	-14.174	37.2629
20180517_y27100uM 60min 1	6	10	1496.69	13	15.0112	-15.0112	477.597	2	4.44692	13.8706	233.078	-20.1381	28.7109
20180517_y27100uM 60min 1	1	9	1963.41	7	5.98673	-5.98673	268.128	6	5.95205	11.6481	268.128	-6.15888	41.4464
20180517_y27100uM 60min 1	1	10	1891.43	17	7.04751	-7.04751	706.046	3	0.758326	13.3348	251.279	-9.5711	60.4791
20180605	1	8	1318.31	10	10.2765	-10.2765	473.436	6	8.49141	26.9515	291.426	-14.0331	57.7608
20180605	2	4	1557.84	60	20.7583	-20.7583	1179.54	6	6.57204	18.8811	277.697	-21.1222	58.8247
