# Supplementary material for: A mechano-osmotic feedback couples cell volume to the rate of cell deformation
Source: eLife journal article supplement (doi:10.7554/elife.72381), 2022-04-13
Supplement: supp [file Y27_single_cells.xlsx]

## Sheet: V
dV/dt	-19.0261	-22.7083	-35.8206	-9.19836	-37.6138	-56.1214		-40.6854	-45.7365	-35.2587	-23.6424	-102.712	-22.4131	-22.0381	-13.6657	-43.8327	-27.7961	-31.0977	-38.5042	-17.3095	-34.9967	-43.8185	-15.0736	-7.95581	-21.2119	-15.8597	-13.3188	-42.0446	-15.9793	-12.9854	-18.4615	-3.22016	-11.8867	-11.8508	-8.61106	-12.4099	-16.1918	-19.7541	-0.726256	-23.5798	-20.7273	-9.79928	-12.2013	-11.4434	-7.20854	-12.5024	-13.2752	-12.3249	-11.1933
position	1	1	1	1	2	2	2	2	2	3	3	3	3	3	4	4	4	4	5	5	5	5	4	4	4	4	4	4	4	5	5	7	7	7	9	9	10	11	12	12	12	12	1	1	2	2	2	2	2
time (min) /cell	1	3	4	5	1	2	3	5	6	1	2	3	4	6	1	2	3	4	1	2	4	9	1	3	4	6	9	10	11	4	8	1	2	3	2	4	2	4	1	3	5	7	1	4	2	3	5	6	7
0	2247.62	1470.5	2818.32	1680.36	2066.08	2069.34		1588.35	1679.81	1632.82	1513.14	2704.62	3116.4	1107.05	2273.34	2739.29	1737.45	2222.97	1883.63	2132.18	1443	2523.36	1556.38	1366.91	1468.69	1710.22	1617.24	1216.69	1175.22	1973.99	1735.09	1367.43	920.165	1208.1	1274.06	3016.29	1271.55	1801.45	2407.72	1870.62	1479.82	3808.33	1412.81	1256.99	1233.33	1767.92	1694.41	1164.11	1693.48
1	2216.76	1429.5	2743.76	1638.59	1981.18	1939.97		1521.16	1592.58	1562.47	1441.32	2581.04	3068.81	1048.49	2263.31	2576.98	1696.3	2213.61	1798.18	2108.15	1336.14	2448.91	1554.04	1358.25	1446.83	1689.76	1612.03	1118.8	1152.52	1964.43	1723.45	1361.51	888.84	1194.53	1273.99	3008.92	1248.05	1764.73	2414.68	1839.68	1407.18	3812.61	1410.45	1236.94	1221.64	1749.36	1690.16	1164.52	1666.19
2	2181.74	1396.68	2676.71	1624.83	1918.55	1834.29		1461.1	1481.95	1506.67	1390.49	2421.76	3037.33	987.308	2253.42	2487.67	1659.33	2178.29	1714.2	2087.64	1242.13	2380.42	1541.25	1365.24	1417.34	1672.13	1604.96	1020.61	1124.91	1952.26	1711.51	1370.99	867.614	1181.27	1257.72	2999.91	1221.2	1744.08	2384.84	1813.08	1371.43	3795.95	1386.82	1211.89	1224.91	1739.86	1681.88	1146.59	1664.23
3	2167.08	1378.39	2595.72	1611.56	1862.17	1775.59		1388.78	1394.26	1453.87	1366.87	2265.31	3001.3	971.489	2237.94	2425.34	1633.19	2134.36	1669	2059.28	1191.37	2312.47	1522.11	1357.24	1392.8	1671.58	1599.84	910.993	1091.78	1935.4	1694.01	1360.89	844.229	1179.94	1260.84	3000.47	1192.4	1724.78	2404.48	1797.6	1336.97	3808.6	1388.56	1196.81	1198.73	1733.35	1663.1	1144.9	1661.85
4	2150.18	1341.78	2539.33	1597.85	1829.7	1721.6		1330.44	1353.13	1416.13	1331.56	2116.72	2993.9	938.241	2220.93	2382.42	1599.5	2117.51	1628.04	2048.5	1151.42	2261.32	1501.17	1341.77	1362.26	1651.49	1593.31	846.187	1071.11	1934.23	1666.19	1347.91	825.71	1158.35	1249.3	2988.57	1183.56	1704.42	2398.85	1760.8	1304.41	3796.43	1368.93	1195.49	1202.12	1730.3	1652.53	1131.08	1639.85
5	2131.72	1331.06	2517.72	1596.18	1799.25	1669.89		1301.88	1322.54	1392.71	1312.34	2005.68	2981.29	918.945	2199.2	2345.78	1568.45	2092.44	1599	2037.44	1126.02	2229.04	1477.28	1332.11	1340.59	1623.65	1576.8	816.087	1051.48	1922.03	1650.43	1353.46	814.091	1145.74	1247.84	2966.58	1178.02	1688.39	2400.94	1735.1	1281.79	3793.2	1349.08	1175.14	1184.79	1712.47	1631.55	1111.53	1634.11
6	2124.31	1308.8	2506.42	1590.15	1760.78	1625.37		1281.11	1286.43	1358.91	1294.09	1913.77	2964.03	906.337	2187.76	2316.89	1539.18	2056	1570.96	2023.72	1113.69	2204.16	1456.06	1337.68	1315.61	1609.9	1546.71	806.958	1033.39	1920.72	1632.57	1348.47	804.655	1139.38	1234.14	2963.27	1168.46	1669.51	2403.31	1705.07	1273.09	3779.3	1338.19	1174.23	1179.01	1705.24	1624.17	1085.77	1620.76
7	2103.8	1278.75	2499.88	1585.99	1730.33	1567.83		1231.46	1256.16	1324.33	1270.51	1834.63	2936.31	886.631	2165.5	2290.08	1513.22	2021.07	1541.83	2006.11	1079.46	2157.53	1439.33	1321.92	1300.64	1598.89	1538.05	800.863	1026.35	1896.13	1604.4	1343.52	803.377	1121.1	1229.58	2946.04	1139.04	1649.43	2416.98	1683.77	1251.75	3760.04	1314.53	1164.72	1172.52	1687.96	1612.38	1083.21	1611.75
8	2075.09	1266.69	2467.23	1581.98	1701.2	1531.61		1216.63	1234.01	1296.88	1264.85	1790.44	2918.11	875.997	2157.32	2259.25	1496.38	1979.14	1514.29	1990.48	1067.41	2127.92	1437.81	1299.96	1284.51	1582.74	1523.42	786.356	1022.28	1881.35	1592.15	1344.97	796.015	1116.72	1208.3	2925.79	1126.5	1621.87	2399.89	1665.35	1254.25	3757.52	1318.43	1164.26	1183.8	1663.02	1597.69	1062	1591.57
9	2053.53	1255.62	2443.61	1575.21	1695.59	1507.54		1197.44	1213.22	1283.01	1266.73	1735.14	2892.86	881.971	2153.13	2242.5	1469.18	1946.61	1483.77	1964.71	1058.41	2097.14	1428.16	1298.86	1275.64	1567.21	1497.71	768.727	1023.16	1853.56	1575.19	1342.88	797.747	1096.76	1197.74	2913.45	1117.24	1611.9	2402.5	1653.65	1257.75	3738.16	1304.72	1146.81	1160.09	1648.86	1566.62	1071.22	1594.98
10	2054.11	1234.46	2441	1566.19	1663.98	1464.58		1171.73	1194.43	1269.83	1254.09	1713.32	2867.58	862.533	2154.11	2246.81	1465.45	1929.54	1470.29	1950.64	1052.39	2065.68	1429.67	1293.51	1264.88	1550.37	1498.64	764.218	1022.46	1837.97	1561.73	1333.94	795.042	1091.66	1190.81	2890.94	1101.16	1599.57	2386.57	1646	1254.01	3698.22	1305.75	1122.99	1163.75	1642.53	1577.66	1052.1	1571.65
11	2038.07	1227.68	2418.08	1572.26	1669.96	1444.57		1184.92	1196.83	1265.14	1257.81	1690.43	2854.35	869.779	2149.89	2232.87	1453.09	1916.37	1441.53	1948.37	1044.68	2046.51	1416.28	1283.19	1276.15	1537.67	1491.72	755.486	1023.22	1823.86	1545.65	1328.48	797.541	1087.41	1186.72	2864.56	1101.84	1591.24	2358.49	1644.14	1261.51	3685.66	1300.42	1118.88	1157.97	1622.51	1565.73	1062.14	1578.79
12	2017.97	1223.27	2416.99	1571.91	1652.64	1427.71		1193.48	1201.35	1258.41	1258.43	1673.35	2853.77	857.272	2159.26	2224.52	1444.79	1904.06	1441.1	1951.59	1045.37	2028.69	1419.34	1283.44	1256.5	1525.66	1481.08	758.323	1032.79	1788.59	1529.82	1319.36	793.616	1097.63	1181.41	2842.72	1074.55	1583.15	2322.58	1633.55	1261.06	3664.14	1299.23	1110.61	1146.63	1619.28	1553.12	1070.26	1564.14
13	2009.03	1232	2386.93	1567.76	1651.24	1405.83		1201.39	1210.98	1259.48	1264.48	1675.46	2851.23	873.046	2154.11	2223.12	1433.31	1896.62	1433.64	1947.58	1046.14	2027.83	1426.11	1283.04	1259.13	1509.86	1477.67	766.909	1044.28	1769.14	1531.67	1315.44	797.216	1110.71	1183.13	2805.42	1064.45	1580.61	2310.48	1644.13	1262.03	3632.45	1287.85	1107.97	1143.75	1625.64	1553.18	1066.84	1581.52
14	2005.08	1226.09	2386.65	1559.7	1648.09	1402.35		1211.82	1204.11	1257.84	1275.95	1675.13	2839.01	875.899	2158.63	2228.93	1430.32	1876.93	1433.06	1933.79	1047.79	2014.94	1427.36	1281.11	1256.87	1502.19	1470.54	771.924	1051.29	1741.17	1520.46	1302.74	804.012	1110.17	1189.62	2783.98	1060.42	1579.79	2294.72	1631.38	1270.01	3593.08	1299.51	1101.8	1144.71	1605.23	1552.01	1084.14	1587.73
15	1974.11	1220.37	2368.69	1560.15	1650.88	1404.77		1217.45	1218.37	1269.61	1282.38	1676.91	2818.82	878.157	2155.04	2234.61	1430.05	1872.54	1423.58	1938.34	1042.05	2022.3	1433.42	1283.87	1272.28	1503.66	1475.24	783.049	1055.92	1723.81	1520.14	1300.84	799.443	1118.78	1185	2755.6	1053.16	1576.06	2281.66	1632.3	1269.39	3562.18	1301.07	1100.13	1146.94	1594.14	1558.04	1070.19	1570.39
16	1958.04	1229.15	2367.13	1557.18	1642.1	1408.8		1230.11	1227.87	1267.55	1273.86	1679.92	2832.23	875.864	2151.71	2235.53	1420.18	1866.98	1418.22	1931.25	1058.56	2021.62	1430.6	1279.05	1273.74	1487.77	1477.28	793.563	1068.92	1706.49	1514.51	1295.52	811.054	1124.19	1190.83	2730.43	1047.05	1574.6	2251.01	1630.95	1264.49	3557.81	1300.44	1098.11	1129.03	1599.83	1543.33	1055.06	1578.96
17	1951.19	1217.3	2364.16	1557.33	1653.96	1415.92		1238.62	1217.92	1223.61	1283.64	1675.09	2843.8	879.419	2144	2243.91	1413.91	1882.07	1427.5	1923.11	1050.56	2023.77	1434.28	1284.78	1270	1492.37	1472.15	798.346	1070.07	1700.91	1518.01	1299.62	813.579	1124.65	1176.35	2704.43	1045.65	1582.26	2251.77	1627.6	1278.98	3539.65	1305.92	1095.96	1128.71	1592.91	1539.05	1076.62	1588.08
18	1945.98	1225.97	2370.96	1558.67	1646.08	1416.2		1247.71	1230.83	1229.08	1282.61	1695.08	2842.24	882.471	2147.06	2241.89	1411.72	1872.07	1407.55	1934.31	1054.96	2029.92	1430.61	1278.2	1275.04	1488.22	1486.16	812.753	1074.46	1703.36	1510.39	1309.5	813.437	1141.25	1180.26	2695.03	1045.52	1587.14	2246.33	1634.14	1292.85	3525.83	1303.78	1104.65	1117.94	1581.59	1532.19	1062.54	1569.36
19	1936.96	1221.69	2367.01	1555.34	1650.43	1442.61		1260.64	1239.8	1227.26	1276.19	1710.55	2836.16	896.299	2146.82	2241.33	1413.89	1892.39	1423.86	1936.34	1058.25	2035.87	1432.51	1284.98	1281.36	1484.7	1474.46	823.6	1083.5	1694.94	1509.05	1297.11	818.468	1147.83	1185.24	2685.09	1039	1589.8	2246.81	1638.62	1299.61	3486.8	1309.5	1111.76	1108.42	1577.25	1516.5	1075.67	1583.15
20	1902.1	1225.4	2371.75	1558.62	1650.91	1443.54		1275.69	1242.29	1246.71	1293.01	1731.76	2842.18	895.143	2131.57	2242.63	1402.44	1888.12	1417.65	1922.16	1065.63	2046.59	1434.46	1293.89	1285.74	1481.9	1479.13	825.149	1088.69	1691.33	1519.99	1307.51	817.197	1143.22	1180.29	2658.47	1030.98	1567.46	2237.52	1649.02	1306.29	3501.94	1312.18	1099.14	1113.84	1572.59	1536.62	1069.69	1593.85
21	1901.68	1211.39	2373.91	1550.53	1653.33	1448.07		1261.09	1260.82	1238.75	1294.84	1737.93	2852.99	903.601	2138.22	2246.9	1395.63	1894.26	1429.09	1917.8	1069.59	2067.35	1433.42	1301.29	1292.72	1485.56	1479.41	838.726	1092.57	1695.53	1527.91	1313.35	820.292	1163.21	1189.36	2657.72	1028.02	1583.64	2247.56	1655.03	1308.2	3496.63	1307.17	1095.13	1113.03	1565.47	1546.21	1084.19	1591.61
22	1910.87	1214.55	2380.69	1559.65	1652.96	1462.72		1263.23	1258.65	1248.46	1286.58	1765.2	2857.5	904.235	2145.71	2256.56	1401.51	1910.87	1427.52	1932.79	1070.22	2086.16	1440.11	1305.54	1297.41	1475.97	1475.33	845.677	1100.27	1699.89	1524.76	1314.19	825.736	1162.99	1191.56	2661.07	1029.13	1586.95	2227.03	1656.65	1309.17	3488.07	1327.83	1090.05		1558.48	1540.44	1081.6	1580.7
23	1906.32	1221.56	2383.31	1567.63	1656.07	1475.8		1268.86	1273	1258.49	1294.11	1774.79	2850.33	910.164	2140.36	2251.69	1403.13	1917.24	1425.22	1936.74	1080.8	2085.08	1445.67	1305.48	1320.2	1469.49	1486.48	845.472	1109.7	1692.22	1536.44	1301.04	823.663	1166.75	1189.33	2650.66	1048.09	1592.16	2239.59	1664.7	1324.46	3482.62	1327.76	1094.92		1551.16	1546.48	1069.09
24	1900.02	1220.32	2381.83	1565.39	1661.44	1482.92		1271.63	1272.57	1260.19	1307.77	1795.99	2869.05	925.273	2127.89	2262.64	1400.08	1932.54	1433.76	1937.85	1095.22	2093.16	1438.45	1304.76	1320.04	1472.91	1486.5	855.042	1110.56	1705.24	1539.5	1305.18	826.731	1160.28	1190.24	2650.69	1043.37	1591.28	2232.72	1666.89	1320.39	3483.96	1327.78	1094.62		1536.46	1538.56	1067.15
25	1905.19	1219.38	2380.06	1571.85	1662.64	1496.25		1284.64	1278.64	1268.97	1306.47	1825.87	2855.95	933.275	2128.86	2259.32	1404.78	1933.27	1438.41	1926.98	1090.56	2100.81	1441.4	1306.66	1329.4	1461.73	1487.07	868.457	1130.53	1704.91	1549.21	1297.61	830.179	1169.04	1181.99	2658.26	1050.91	1598.78	2250.48	1681.02	1333.24	3461.12	1338.56	1099.82		1542.85	1536.41	1081.05
26	1888.83	1220.37	2385.38	1574.43	1657.37	1510.06		1284.18	1296.15	1265.43	1311.27	1846.55	2869.43	929.547	2141.22	2255.99	1409.8	1942.71	1454.54	1939.94	1095.6	2113.66	1448.56	1312.06	1338.69	1463.14	1495.26	877.934	1129.1	1714.11	1547.58	1302.16	833.642	1183.09	1193.83	2653.83	1063.06	1599.95	2254.59	1689.22	1340.27	3465.29	1337.74	1103.94		1534.68	1517.03	1077.09
27	1878.88	1219.25	2374.21	1577.56	1658.1	1515.24		1296.35	1298.59	1277.96	1313.47	1849.98	2874.14	936.896	2134.41	2263.28	1406.78	1941.72	1449.87	1949.08	1108	2125.72	1449.13	1307.07	1351.93	1469.04	1502.7	881.562	1132.56	1710.46	1546.48	1303.49	834.409	1185.93	1189.26	2666.31	1062.16	1603.63	2252.85	1684.05	1347	3448.58				1523.79
28	1883.05	1225.95	2379.92	1582.7	1666.99	1537.05		1293.63	1310.39	1281.9	1312.6	1874.74	2886.83	947.852	2132.75	2260.47	1410.41	1959.91	1471.85	1948.53	1110.13	2145.65	1442.95	1311.26	1367.49	1459.8	1505.19	884.855	1137.11	1711.67	1548.04	1306.67	831.06	1186.12	1192.43	2660.78	1075.86	1600.85	2251.36	1691.76	1343.05	3453.15				1518.24
29	1898.53	1224.87	2380.89	1586.93	1671.2	1533.45		1296.05	1306.44	1288.85	1316.13	1895.41	2886.08	950.423	2138.43	2265.05	1424.66	1969.74	1467.69	1947.64	1128.24	2152.67	1446.79	1320.22	1360.23	1474.22	1512.14	886.027	1136.73	1715.43	1554	1313.09	838.321	1194.4	1196.01	2662.89	1079.94	1605.76	2258.04	1704.61	1350.95	3460.44
30	1893.67	1221.8	2376.74	1584.66	1654.07	1549.74		1320.27	1317.66	1285.51	1330.83	1910.82	2888.99	947.267	2140.53	2269.11	1428.76	1986.5	1472.16	1951.08	1138.11	2167.97	1451.5	1317.59	1368.19	1469.01	1518.49	893.59	1135.77	1715.17	1558.51	1304.23	836.884	1190.2	1191.29	2662.72	1080.76	1612.99	2250.19	1706.59		3455.24
31	1887.79	1234.07	2381.41	1584.94	1668.67	1560.38		1305.15	1314.4	1290.59	1333.51	1928.61	2888.47	940.655	2141.29	2278.31	1443.47	1987.36	1486.69	1959.44	1142.2	2161.05	1450.88	1318.3	1375.93	1462.26	1520.8	896.482	1144.56	1726.07	1564.13	1312	839.813	1188.86	1197.7	2658.93	1077.75	1614.18	2262.96	1714.69		3452.98
32	1886.19	1234.75	2376	1600.11	1659.54	1574.72		1320.23	1330.4	1292.05	1343.2	1948.73	2904.4	957.28	2130.54	2274.66	1452.02	1989.09	1500.89	1969.65	1156.91	2166.72	1445.52	1322.76	1392.31	1464.27	1525.14	909.917	1143.63	1725.4	1566.45	1309.02	836.657	1201.37	1193.59	2668.98	1088.1	1613.72	2247.2	1718.35		3464.47
33	1881.98	1229.77	2363.24	1600.99	1671.25	1589.35		1315.61	1336.05	1305.16	1355.63	1950.81	2896.21	967.44	2129.14	2287.71	1456.02	1999.5	1514.01	1971.4	1168.7	2172.08	1453.58	1315.71	1379.15	1483.96	1508.99	922.042	1143.55	1729.14	1567.35	1317.22	838.845	1202.8	1196.51	2678.07	1098.73	1617.77	2266.91	1727.11		3455.68
34	1900.14	1245.45	2374.66	1596.18	1683.75	1586.58		1311.29	1338.73	1319.58	1367.1	1973.7	2910.16	969.791	2127.4	2288.68	1462.12	2009.49	1518.23	1970.16	1187.29	2182.68	1454.13	1321.31	1373.65	1484.05	1521.12	911.735	1162.88	1744.14	1574.19	1322.17	835.678	1210.41	1192.42	2681.63	1105.89	1620.3	2259.71	1735.34		3451.02
35	1892.46	1238.79	2378.18	1597.71	1695.29	1601		1313.99	1341.98	1304.44	1370.53	1975.09	2912.05	977.208	2139.77	2291.1	1477.64	2010.35	1522.04	1960.35	1192.36	2196.38	1460.86	1311.84	1389.04	1482.45	1518.2	926.646	1154.49	1751.24	1569.34	1327.42	836.643	1214.4	1194.68	2684.29	1101.08	1626.85	2266.56	1742.75		3450.96
36	1885.1	1241.54	2369.58	1612.45	1686.43	1616.83		1306.71	1352.66	1321.98	1379.76	2001.1	2915.78	981.184	2134.66	2300.01	1477.17	2014.84	1534.5	1972.43	1200.31	2216.26	1462.7	1314.35	1394.02	1477.88	1533.41	922.685	1155.02	1748.88	1579.87	1318.95	841.544	1218.13	1188.14	2676.36	1116.24	1625.29	2268.17	1757.7		3449.42
37	1898.12	1245.9	2370.4	1605.03	1691.29	1629.06		1308.56	1351.04	1317.8	1390.07	2005.15	2904.78	986.206	2133.28	2244.85	1476.78	2028.14	1546.4	1979.38	1195.78	2221.33	1472.01	1321.18	1389.03	1483.17	1529.48	915.219	1150.33	1782.7	1587.61	1311.81	841.423	1221	1187.73	2669.38	1112.53	1619.96	2272.04	1761.33		3451.38
38	1887.3	1245.72	2369	1623.09	1696.6	1650.47		1313.82	1338.26	1331.94	1403.5	2032.51	2903.35	986.233	2140.68	2244.73	1487.85	2031.12	1555	1983.67	1209.88	2212.84	1475.42	1314.01	1391.76	1483.13	1539.04	917.129	1155.55	1751.92	1576.72	1319.66	843.613	1237.09	1195.76	2681.81	1124.15	1627.23	2274.2	1765.14		3452.9
39	1908.31	1257.6	2350.09	1615.63	1703.5	1652.07		1306.49	1355.3	1336.7	1397.86	2027.97	2904.96	1002.27	2133.15	2246.78	1497.83	2039.29	1563.55	1989.29	1216.23	2229.28	1472.94	1319.66	1394.8	1486.75	1534.08	921.311	1156.72	1758.18	1577	1326.12	844.42	1226.61	1207.33	2688.95	1127.58	1628.33	2284.64	1766.51		3476.79
40	1907.05	1261.39	2373.33	1612.81	1708.56	1657.12		1312.87	1349.57	1328.68	1417.09	2041.2	2899.73	1001.83	2138.67	2248.24	1502.16	2033.61	1562.33	1985.06	1224.66	2219.65	1472.76	1313.07	1404.83	1494.52	1541.02	921.898	1151.51	1771.75	1572.71	1316.68	839.963	1228.33	1202.7	2678.98	1133.45	1635.52	2264.69	1774.88		3486.87
41	1924.61	1271.14	2362.5	1607.79	1703.14	1669.4		1303.44	1360.26	1340.31	1422.5	2051.31	2910.63	1006.12	2145.44	2242.12	1505.44	2044.87	1576.39	2003.33	1220.69	2232.12	1473.36	1318.94	1406.92	1494.52	1540.53	920.68	1157.87	1762.71	1570.27	1309.24	842.281	1234.12	1193.21	2690.84	1136.94	1643.87	2267.34	1775.77		3502.42
42	1911.99	1277	2356.32	1615.2	1719.99	1668.73		1303.98	1360.39	1327.29	1419.85	2044.54	2910.27	996.412	2148.92	2235.38	1504.76	2040.73	1588.37	1999.14	1215.22	2245.37	1461.43	1322.59	1404.67	1503.79	1543.02	923.965	1157.68	1763.6	1564.62	1310.94	847.129	1238.97	1201.54	2692.38	1145.22	1649.29	2260.02	1771.89		3511.94
43	1923.44	1287.36	2348.92	1619.28	1712.19	1679.12		1294.23	1362.63	1343.76	1438.39	2046.16	2906.4	1011.44	2157.11	2265.09	1516.25	2065.21	1596.06	1999.31	1242.44	2247.29	1466.61	1320.23	1406.81	1503.25	1542.35	924.811	1161.73	1772.54	1563.88	1318.85	852.014	1245.22	1198.23	2692.7	1146.36	1646.84	2289.13	1782.55		3504.03
44	1921.71	1300.72	2343.99	1625.26	1714.21	1687		1303.2	1378.65	1348.28	1452.03	2061.3	2891.89	1010.01	2152.15	2261.69	1526.82	2054.35	1595.93	1999.99	1241.28	2242.98	1462.71	1326.05	1406.52	1508.13	1541.7	930.734	1162.54	1778.18	1576.42	1312.75	847.016	1231.4	1195.86	2695.49	1150.97	1657.15	2252.57	1767.24		3535.56
45	1919.89	1308.92	2346.28	1629.5	1734.28	1687.28		1299.95	1381.59	1364.61	1453.56	2069.63	2904.33	1018.28	2163.93	2257.48	1536.47	2058.96	1605.73	1999.57	1244.11	2257.14	1473.32	1331.2	1411.61	1509.31	1544.72	924.364	1157.08	1786.31	1565.96	1316.6	843.757	1233.55	1201.22	2691.54	1149.21	1647.56	2268.29	1781.89		3584.48
46	1925.71	1311.62	2346.55	1623.65	1736.37	1693.76		1301.45	1371.05	1343.87	1459.62	2071.69	2903.8	1022.34	2153.51	2271.99	1527.71	2058.68	1627.39	2009.38	1237.99	2260.45	1471.96	1331.4	1417.1	1514.53	1546.31	927.458	1163.09	1786.69	1562.55	1312.52	844.538	1218.82	1213.55	2695.49	1156.36	1668.85	2256.16	1780.88		3571.37
47	1925.2	1323.09	2351.94	1633.43	1726.7	1699.54		1314	1368.02	1360.41	1465.6	2074.73	2905.41	1020.31	2162.77	2267.94	1539.18	2072.46	1616.57	2007.32	1240.69	2268.27	1483.5	1338.53	1410.38	1516.85	1543.42	932.582	1159.8	1790.77	1555.76	1304.2	846.859	1221.54	1202.68	2699.03	1156.19	1659.03	2278.33	1790.82		3595.68
48	1928	1325.75	2348.77	1642.25	1744.15	1700.01		1303.93	1376.4	1346.14	1471.23	2077.41	2896.49	1019.54	2161.74	2265.57	1536.79	2086.78	1641.1	2001.38	1259.24	2268.27	1480.96	1337.12	1409.79	1525.99	1543.86	931.394	1152.58	1785.16	1563.96	1297.7	850.744	1223.48	1204.15	2692.02	1157.07	1662.5	2274.92	1784.24		3610.56
49	1929.96	1344.96	2342.93	1635.85	1746.6	1693.8		1314.23	1374.9	1368.73	1478.8	2094.6	2905.33	1030.37	2174.34	2274.53	1547.08	2093.57	1647.6	1995.29	1248.22	2255.56	1482.77	1334.18	1411.03	1536.25	1553.39	934.106	1166.61	1779.75	1554.64	1302.66	846.732	1232.45	1210	2697.45	1160.92	1660.49	2278.54	1780.89		3631.58
50	1930.71	1345.4	2350.29	1632.94	1744.2	1697.59		1317.14	1385.64	1351.53	1477.82	2092.59	2902.82	1026	2167.22	2275.01	1552.22	2102.66	1647.96	1988.71	1250.99	2263.92	1479.05	1345.68	1403.62	1540.51	1557.53	939.58	1166.85	1779.13	1560.22	1301.52	850.717	1224.52	1217.65	2697.31	1161.65	1659.11	2269.28	1786.86		3638.17
51	1934.56	1360.18	2350.5	1632.3	1745.06	1700.01		1305.55	1383.14	1361.16	1478.83	2098.82	2878.46	1033.9	2174.57	2271.67	1556.39	2098.6	1654.39	2008.26	1258.86	2267.03	1484.28	1338.66	1410.22	1546.66	1559.88	953.807	1165.87	1775.62	1563.38	1304.12	841.547	1231.12	1221.78	2701.84	1162.65	1667.22	2266.45	1791.78		3656.83
52	1945.2	1369.47	2345.07	1646.62	1745.1	1708.11		1316.18	1378.06	1363.39	1486.57	2092.92	2897.47	1035.26	2168.1	2290.08	1556.06	2100.36	1663.82	2002.01	1259.76	2266.23	1481.6	1332.37	1400.64	1552.78	1559.62	953.06	1170.67	1784.55	1564.7	1296.75	845.44	1237.92	1218.22	2707.17	1166.24	1664.16	2253.45	1789.39		3672.01
53	1960.88	1377.69	2352	1638.96	1745.41	1713.22		1308.15	1375.39	1356.45	1486.42	2113.9	2890.85	1034.72	2184.06	2269.51	1565.72	2099.34	1661.74	1999.57	1261.23	2263.34	1473.06	1332.04	1405.48	1553.61	1557.58	958.517	1174.15	1771.83	1556.95	1303.61	849.494	1229.48	1211.58	2709.82	1162.67	1663.41	2268.09	1797.36		3692.81
																							1470.65	1326.38	1401.58	1555.7	1565.76	956.343	1163.95	1771.89	1555.95	1310.79	854.417	1242.88	1208.52	2712.42	1158.85	1662.13	2272.62	1782.28		3721.22
																							1476.68	1330.32	1401.59	1559.53	1567.14	958.86	1172.79	1771.78	1556.89	1305.48	854.802	1241.57	1208.04	2720.93	1154.52	1657.47	2275.44	1782.78		3760.36
																							1478.61	1331.43	1391.27	1560.49	1568.32	962.168	1170.41	1759.24	1565.92	1308.34	858.939	1241.73	1215.44	2714.62	1163.38	1656.46	2279.67	1790.85		3768.92
																							1480.88	1341.5	1403.85	1568.55	1573.09	963.573	1172.7	1770.4	1555.43	1305.97	858.242	1230.26	1221.23	2725.5	1155.92	1664.08	2271.15	1783.78		3789.03
																							1491.29	1349.58	1398.31	1570.77	1571.24	965.106	1169.86	1767.4	1553.06	1303.85	862.703	1250.27	1207.66	2712.73	1161	1670.43	2246.14	1780.26		3805.15
																									1403.99	1575.3	1577.74	969.392	1179.34	1767.92	1545.96	1292.95	865.102	1235.1	1209.03	2718.89	1162.97	1673.25	2269.08	1780.8		3819.62
																									1387.59		1574.19	967.633	1176.9	1767.09	1555.12		856.151	1226.27	1218.46	2715.7		1669.31		1783.11
[truncated: 155 more columns]

## Sheet: A
dA/dt	18.6578	24.8997	43.3659	25.1251	10.2185	26.671		39.2368	24.3802	39.7455	26.85	27.5084	42.4327	15.0162	37.6711	23.1696	32.8463	39.2897	8.754	26.4235	22.6102	4.17758	72.5259	34.2187	45.1526	56.1927	38.7956	43.4607	54.602	62.4312	39.4676	28.4078	31.0245	39.1366	32.1904	42.6548	43.9131	47.6788	43.2249	76.3239	63.1179	78.518	36.5875	20.3763	23.3586	39.6047	28.573	41.8323	37.1706
	1	1	1	1	2	2	2	2	2	3	3	3	3	3	4	4	4	4	5	5	5	5	4	4	4	4	4	4	4	5	5	7	7	7	9	9	10	11	12	12	12	12	1	1	2	2	2	2	2
	1	3	4 shift 2-0	5	1	2	3	5 shift 2-0	6 shift 2-0	1	2 shift 4-0	3	4	6	1	2 shift 4-0	3	4	1 shift 2-0	2	4	9	1	3	4	6	9	10	11	4	8	1	2	3	2	4	2	4	1	3	5	7	1	4	2	3	5	6	7
0	43.7866	30.6818	28.4977	22.9854	23.5054	67.7081		16.017	22.8814	14.4569	2.91218	59.6996	36.2982	15.913	22.8814	32.554	56.5794	60.9477	45.1387	45.2427	30.89	7.80047	3.224	56.787	21.737	16.537	33.49	8.633	55.851	36.922	34.01	9.361	51.067	29.226	39.522	48.259	9.153	44.307	14.041	36.298	38.69	26.21	15.3929	13.5208	12.5848	22.8814	17.369	19.0331	17.057
1	33.074	62.6118	45.1387	39.7304		70.3082		42.2265	76.9646	48.0509		86.9492	55.4353	35.9862	39.4184		80.8129	68.8521					35.154	94.126	61.156	56.371	72.7	36.714	101.198	100.678	103.694	32.658	72.908	47.427		110.351	30.89	93.814	70.724	52.003	86.221	48.467	39.6264				74.7805	56.0594	77.0686
2	61.1557	65.3159	98.4939	77.6927	57.5155	84.5571		26.6256	74.9885	99.95	18.9291	105.774	60.9477	56.8914	71.2443	68.4361		103.382		83.101			58.868	203.02	88.509		96.102	49.819	235.366	133.128	147.169	69.892	211.029	86.637	107.23	149.873	68.748	112.951	107.126	233.182	241.295	83.621	41.8105	26.5216	52.3151	99.222		152.785	150.601
3	65.3159	83.517	107.23	109.103	63.4438	114.407		49.715	80.0848	142.385			81.3329	74.5725	144.361		130.112		72.9084		41.29		270.936	235.262	230.998		110.975		297.874	259.184	238.694	73.844	244.103	221.013	221.741	338.956	219.661	135.832	131.672	288.721	286.849	146.857	58.3475			159.338	121.479	194.284	168.49
4	90.0694		191.58	119.503	64.4839	120.231		104.838	152.057	210.197	130.008	198.652	104.942	81.6449	233.702			224.445		120.647			342.597	254.711	297.874	251.799	139.16	81.853		309.211		92.67	271.664			353.933	258.768	295.482				179.619	87.4693	31.8259	135.936	223.509	208.013	274.472
5	112.535	108.999	278.945	141.553	120.543	130.216		225.486	127.2	265.112			177.747	107.23	242.231	95.1657	173.794	210.301	66.772				377.023			329.908	165.474	224.758	377.127	382.535	270.624			255.855		377.959			150.913	424.554	335.108	391.064	104.942	36.4022			179.619		261.16
6	126.16	159.338	310.875	139.68	87.2612	163.706		272.288	150.809	289.865	189.707	256.583	240.878	102.238	278.113			293.09		98.4939		32.866	408.849	290.489	324.916		174.106	285.185	442.547	434.434	281.441		297.458		267.712			334.276	326.58			462.932	193.556	72.2843		288.409		312.747
7	143.737	167.762	317.115	156.945	91.9415	144.153		333.652	137.808	312.227			306.09	109.831	293.402	120.647	286.849	307.963	75.6125				460.02	309.523			298.498		482.381	438.906		211.133	298.186	342.909	310.251	394.6	277.281			530.016			234.118		206.868		236.614	307.026	286.537
8	189.083	243.583	372.758	157.569	97.4539	221.013		312.539		295.274	222.157		285.185		309.315	248.991		343.429		176.603				357.677		445.147	356.325			592.524	364.646	232.974							358.094		507.967	608.333	288.097	149.769		356.845	270.416	324.708
9	196.572	266.36	413.217	272.184	98.1819	252.111		322.939	302.97	377.647		288.617	438.074	167.346	339.788		348.421	411.033	141.761						404.376		387.735	371.198	532.512	592.316			341.869	343.533	322.731	418.833		454.611		732.724			339.06				285.185	453.883	373.694
10	208.117	266.568	415.713	318.675	163.29	406.56		336.044			244.935				400.008	261.68				363.502	243.479									644.527	465.324								448.787		727.212			216.749	232.454	411.449
11	206.244	265.632	403.96	388.567	115.343	445.147						349.877		172.13	440.362		369.014	388.047	172.442								522.423								355.805								442.547				333.34	432.354
12	258.976	318.883	429.234	302.138	105.566	525.128		459.084					575.467	224.445	487.581			385.551					656.175	500.374						808.233									539.584							491.95			381.911
13	266.88	348.005	420.913	414.777	105.566	509.007								276.761	481.133				251.591			246.495				522.215						273.952					357.99					705.058	472.604	239.006			403.856	557.682
14	331.156	355.389	433.186	421.849	128.032	520.031				513.999		392.728	668.032		561.01		475.205								513.895		633.606	468.756	632.878	852.227	593.356		403.752	582.747	438.698	590.131		585.867		773.911	865.54			287.577	260.64	562.57			403.128
15	313.475	366.102	449.411	524.816	144.569	575.051			433.706		292.986					365.79		513.791	262.824	467.82																			671.048				469.588	284.561			431.73	585.867
16	341.661	470.732	492.262	520.031	169.218	593.252						440.778		252.631					269.792																								518.263
17	364.958	541.561	452.635	527	188.875	689.145				599.96									276.761		292.05		699.65	548.633																				349.461			434.018	649.103	470.42
18	368.494	509.319	520.759	556.745	180.763	798.04													324.083							641.719						356.013					441.091		843.179			905.27	607.397		344.053	650.455
19	404.168	485.501	499.958	583.683		743.333				685.921		456.587	832.778		528.456		591.38	515.039							625.91			562.466	612.077	1036.21	829.034		417.377	607.188	596.892	866.476		657.424		834.13	928.152			358.198			467.82
20	466.572	520.447	591.068	740.837					347.381		339.892			254.607		453.779			367.662								695.178																					700.898	544.265
21	384.615	460.956	595.54	722.635													637.662			554.769	318.259																						682.905		336.772		501.206
22	413.633	576.507		720.451									891.75		563.922				402.816																									381.079		717.019			609.269
23	496.734	549.257		706.826				501.31						331.78
24	579.835	616.757		787.015		707.451				651.599		510.255	1011.46	361.318	624.038		683.945	596.06	420.081			411.553																					695.282	420.289			543.121	660.232
25	571.098	585.139		758.518	310.147				378.271		316.179					508.175																														810.833
26	590.86	510.255		699.13																																							746.661	476.141			573.386	738.652
27	658.984	571.93	583.891	759.142																			719.723	612.181
28	582.851	587.947		674.065					412.385					393.04							367.558											524.192							1368.62			1128.68				893.726
29	767.462	535.84		712.963		787.431			439.426	711.091		557.161	1130.96		672.92		809.585	685.401				390.127				747.285	736.156	567.458	625.182	1099.45	1000.54		487.997	669.696		1102.67		923.992		1002	1248.8
30	799.08	545.409		631.526							378.167					579.419
31	789.407	550.817		615.717															529.392	597.308
32	894.142	585.555	614.261						440.05				1012.92
33	837.042	544.993															734.7
34	893.934			714.939		725.132				781.399		471.148	1034.34	345.717	712.755			622.581	569.954
35	894.766				402.192						480.093					590.027
36	1013.44
37	906.31		599.804	706.826					483.109														824.562	623.621
38	848.067			711.299						810.417																744.581						652.119							1559.78			1198.88
39	872.196	583.579		718.163		812.497						500.79	1168.51		729.396		1038.29	654.199							740.837			682.593	594.292		1163.21		482.277	673.752		1159.77		1003.35		1085.31
40	832.674			657.111							446.395					601.468
41	871.364
42	735.74		644.111					543.121	450.659										570.266
43	840.475													401.776	684.985					713.587
44	996.796	580.875		728.252	403.544	772.558						516.599	1149.48				982.443	646.607
45	1028.62									760.702	471.148					652.015			567.354
46	911.199
47	912.447		620.917	605.42					428.298														780.567	639.846
48	944.377													374.318								488.205										666.888							1688.12			1463.37
49		578.899		710.051		762.886				727.212	407.496	474.477	1261.39		670.32	656.279	1024.77	698.09										762.47	640.991				587.739	725.236						1190.46
50	1096.43	536.984		665.432																					811.249
51			640.991					437.866	497.462										652.431
52	959.458																1042.25
53	990.348	592.42		651.807	404.376	770.166				712.027		479.469	1320.57	402.92	709.531		1063.57	643.695		817.593		470.316
																							803.448	722.011
																										698.818						775.263					525.648		1648.6			1321.4
																									798.248		1018.33	746.037	603.964	1347.92	1202.94		533.448	709.739	778.591	1219.68		1099.66		1239.23
[truncated: 61 more columns]
