# Supplementary figures and images for: A mechano-osmotic feedback couples cell volume to the rate of cell deformation
Source: eLife journal article supplement (doi:10.7554/elife.72381), 2022-04-13

# Figure S1

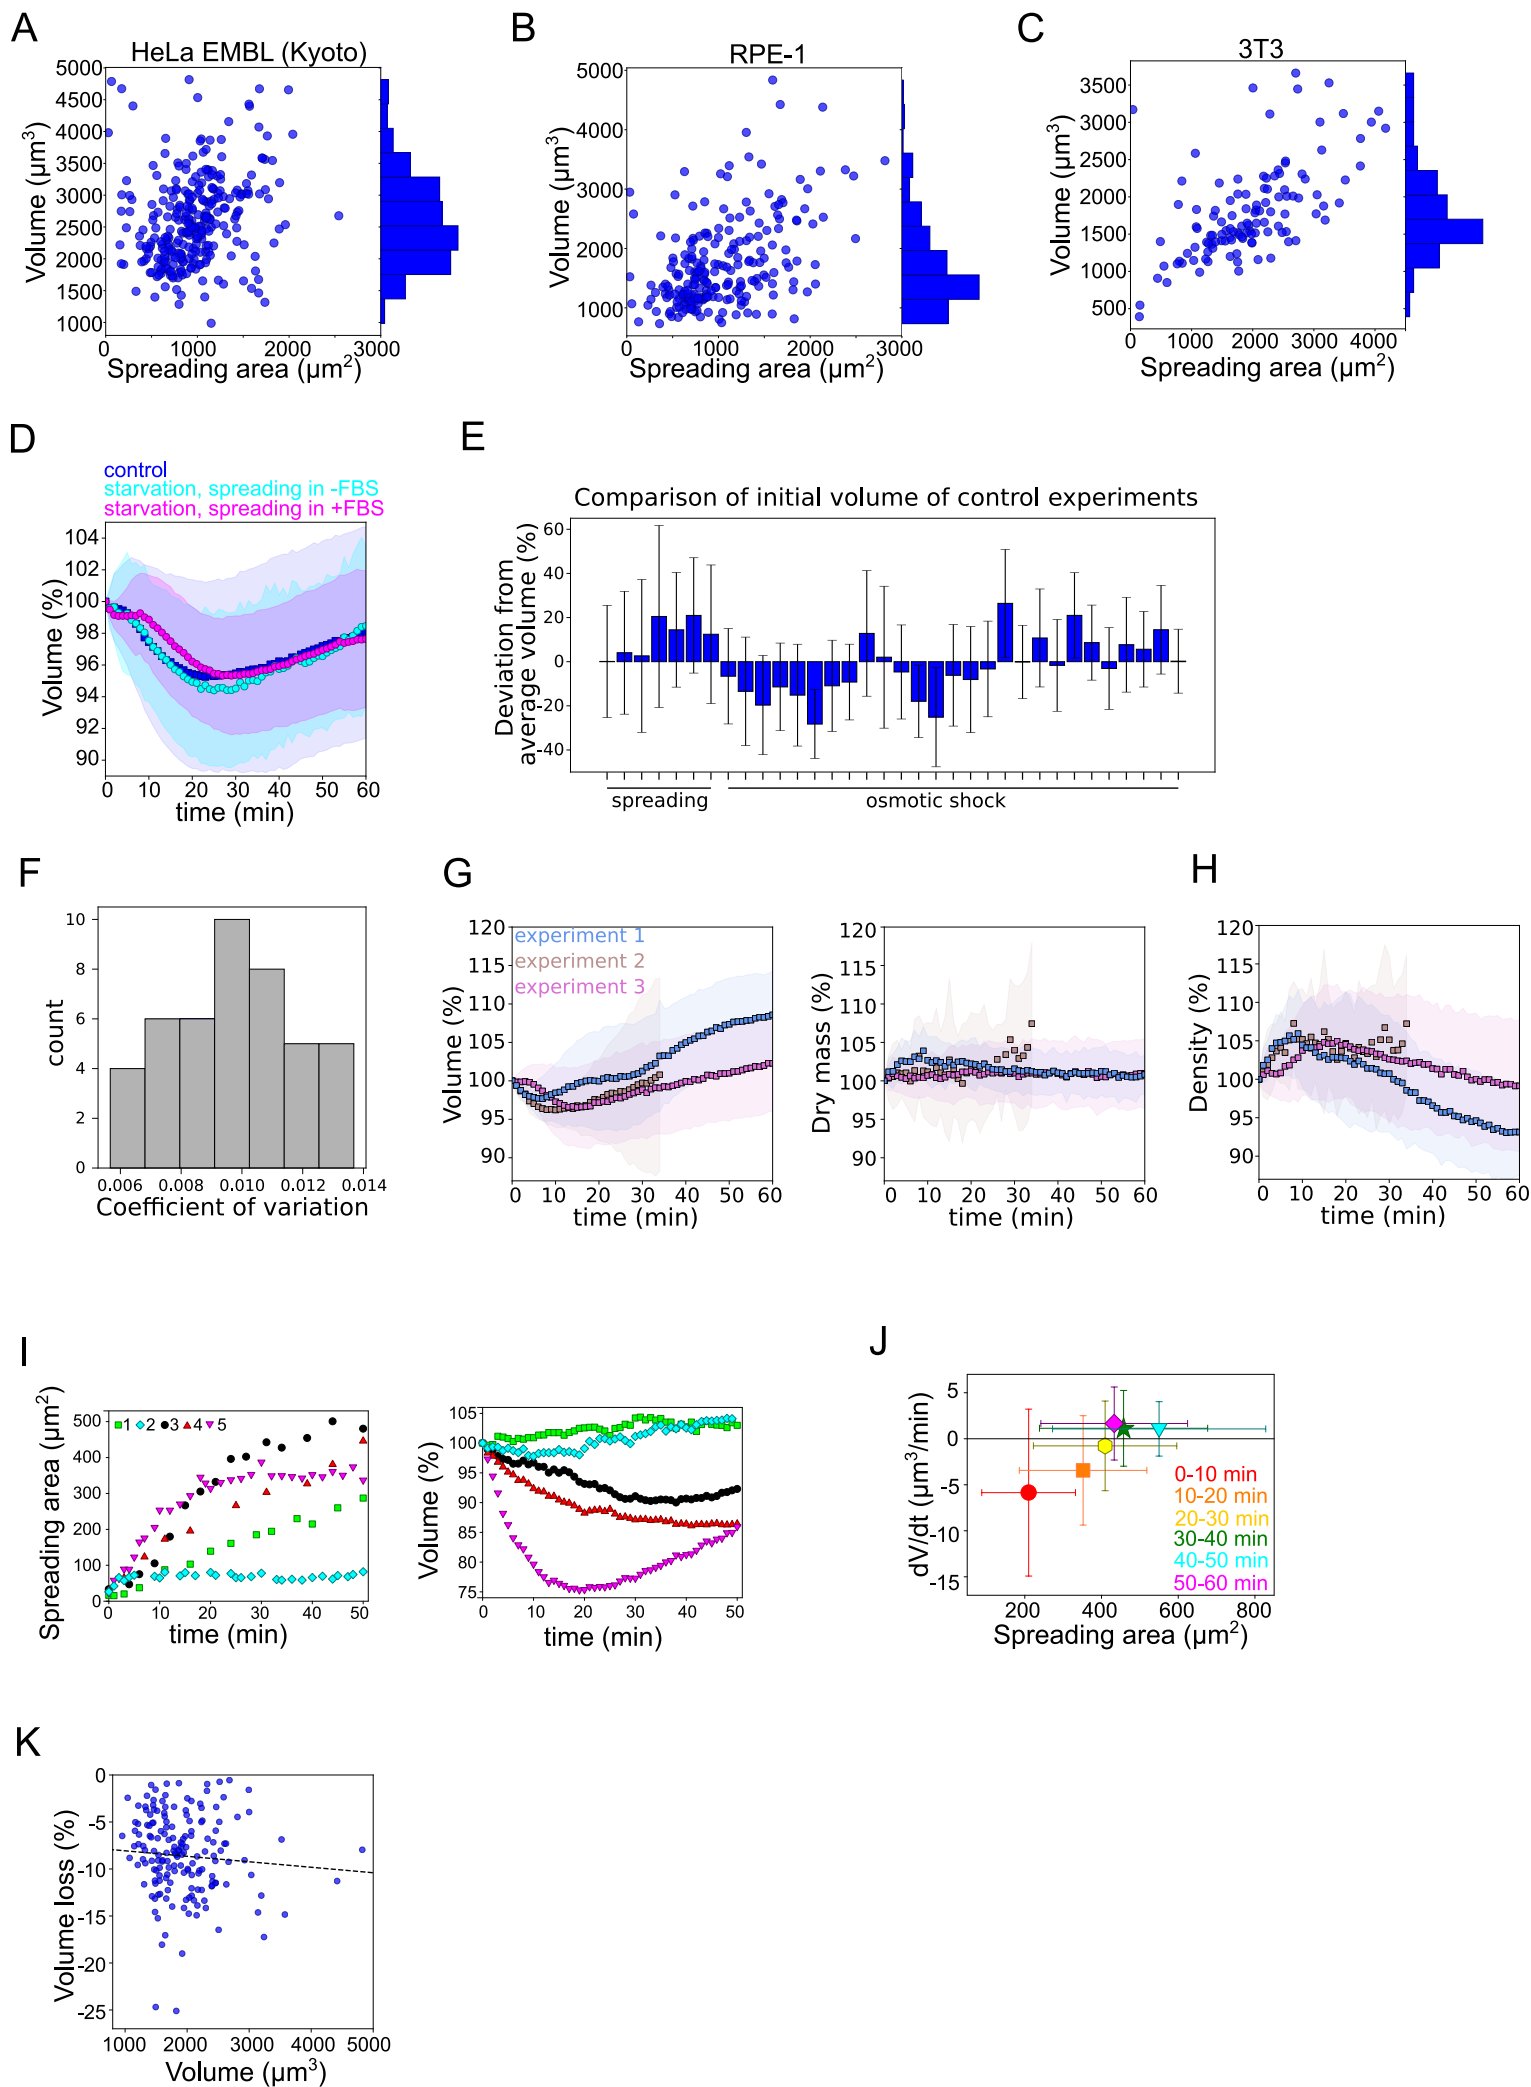

Supplement: supp [file elife_poa_e72381_Figure_1_figure_supplement_1.pdf › elife_poa_e72381_Figure_1_figure_supplement_1.pdf]

# Figure S2

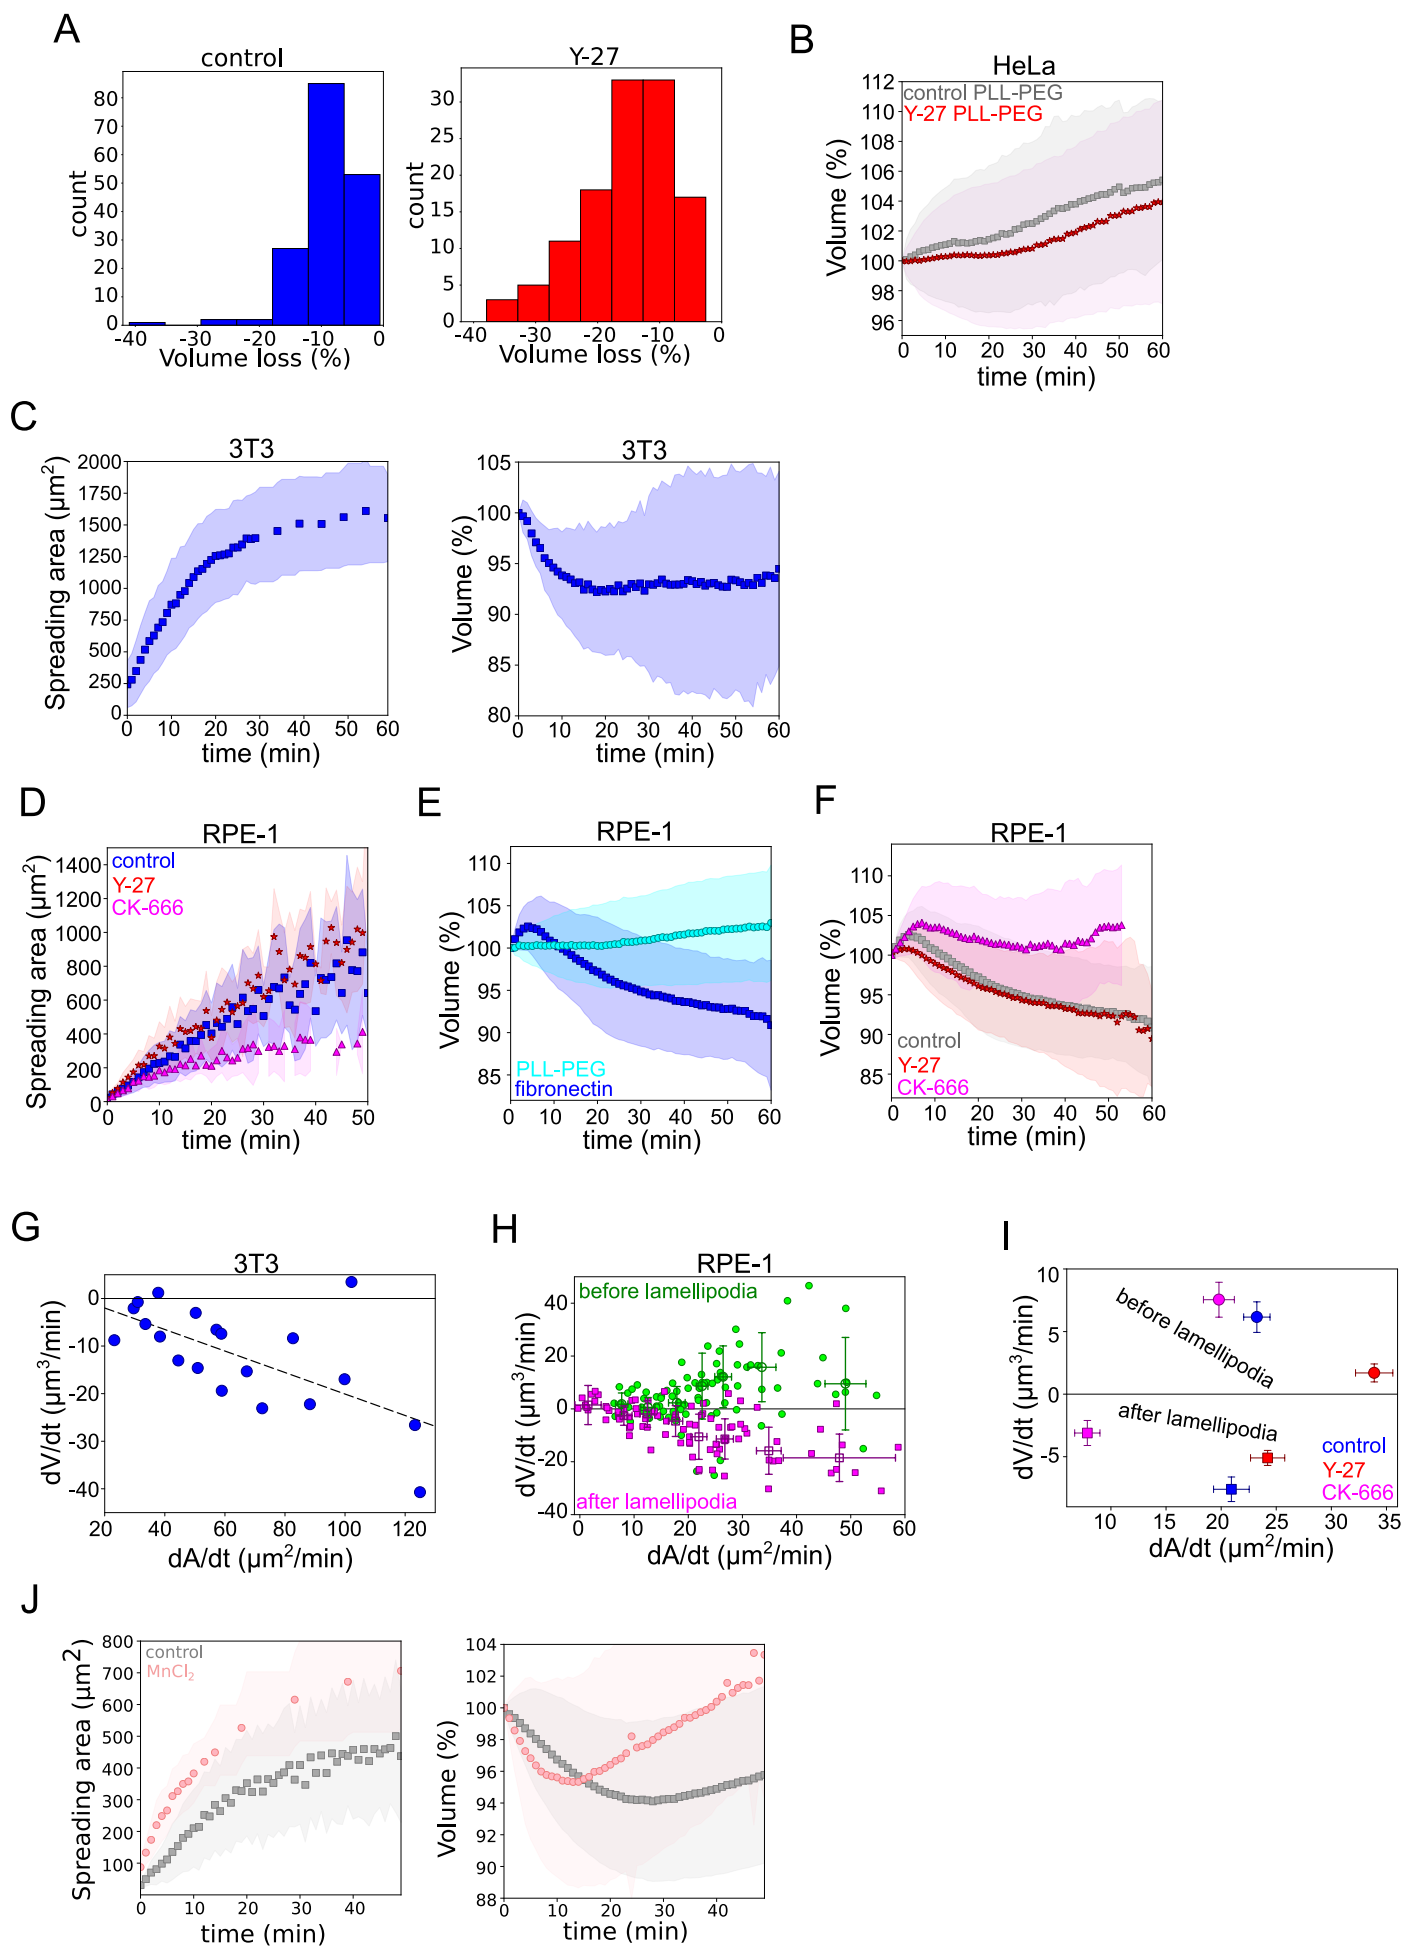

Supplement: supp [file elife_poa_e72381_Figure_2_figure_supplement_1.pdf › elife_poa_e72381_Figure_2_figure_supplement_1.pdf]

# Figure S3

**A**

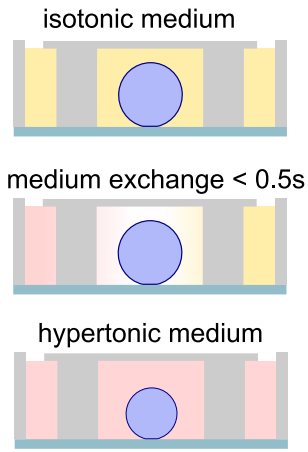

**B**

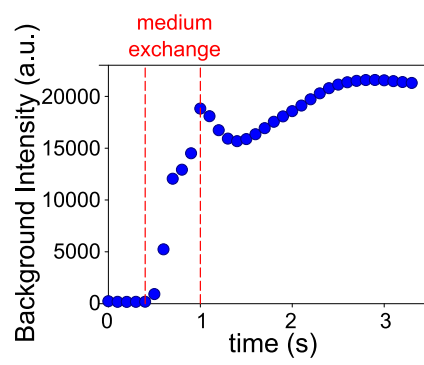

**C**

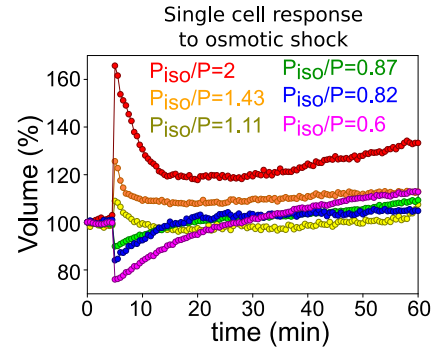

**D**

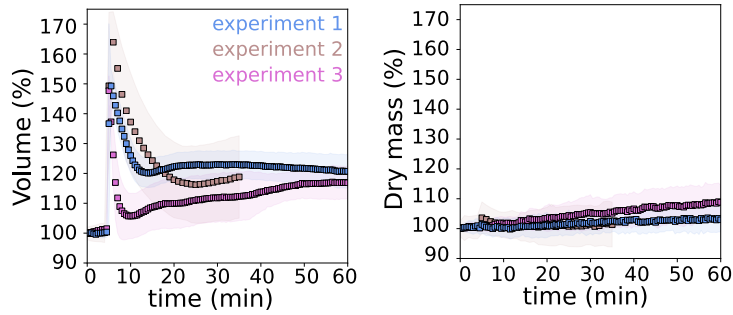

**E**

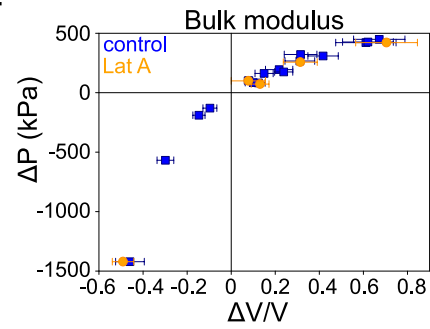

**F**

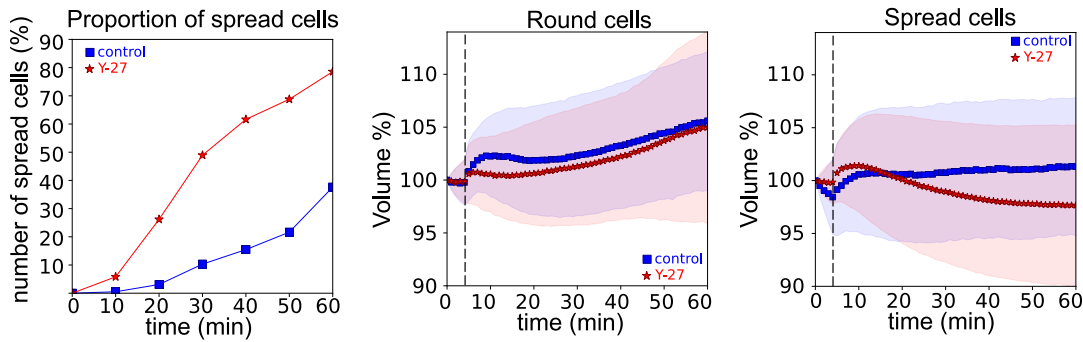

**G**

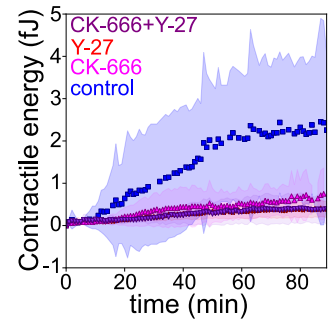

Supplement: supp [file elife_poa_e72381_Figure_3_figure_supplement_1.pdf › elife_poa_e72381_Figure_3_figure_supplement_1.pdf]

# Figure S4

A

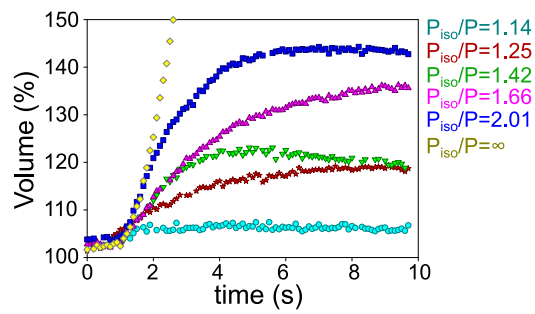

B

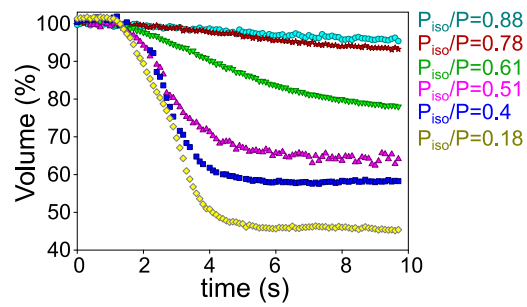

C

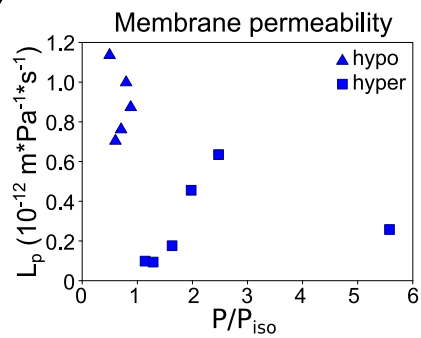

D

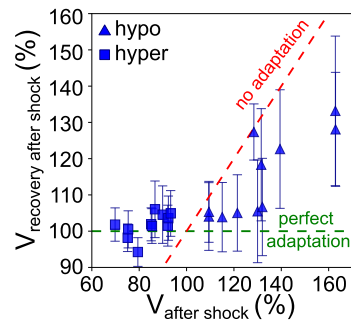

Supplement: supp [file elife_poa_e72381_Figure_4_figure_supplement_1.pdf › elife_poa_e72381_Figure_4_figure_supplement_1.pdf]

Figure S5

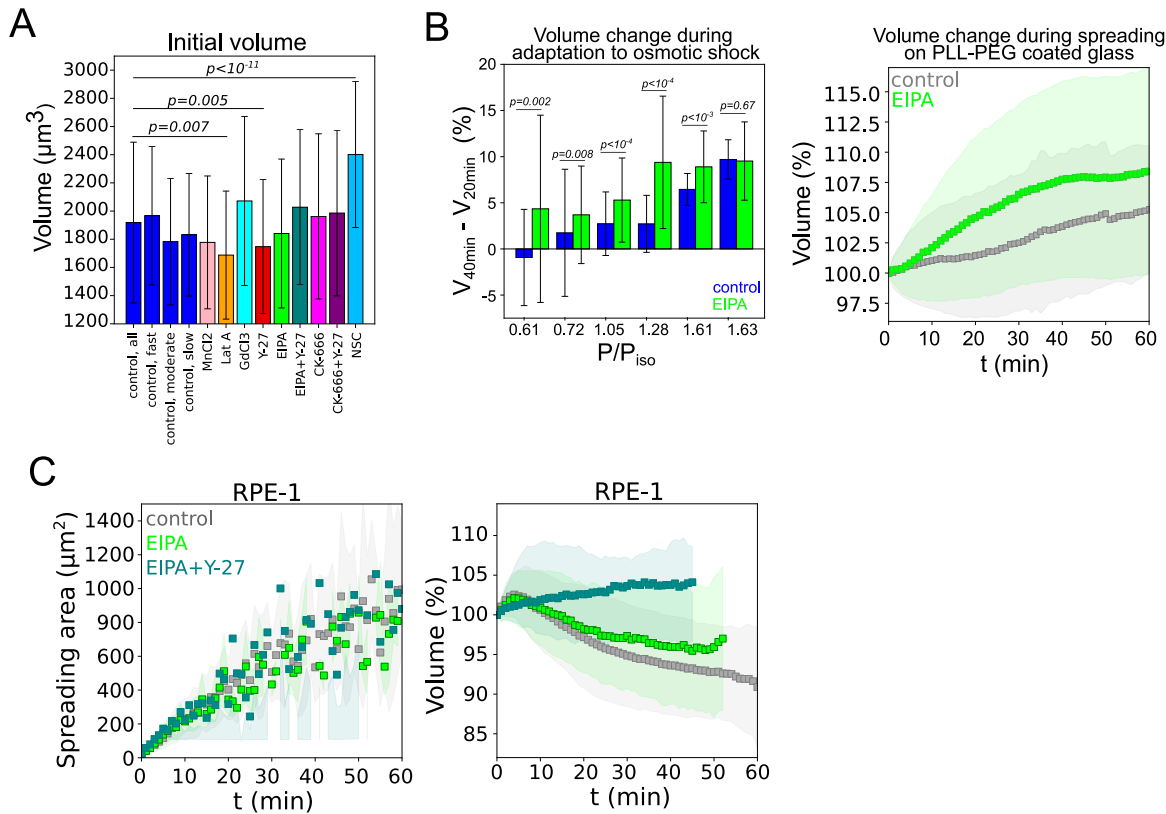

Supplement: supp [file elife_poa_e72381_Figure_5_figure_supplement_1.pdf › elife_poa_e72381_Figure_5_figure_supplement_1.pdf]

# Figure S7

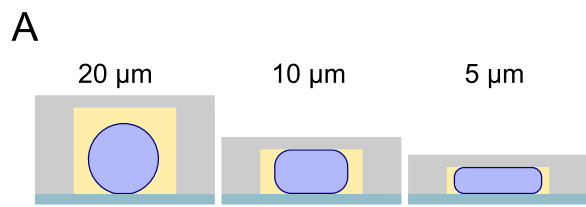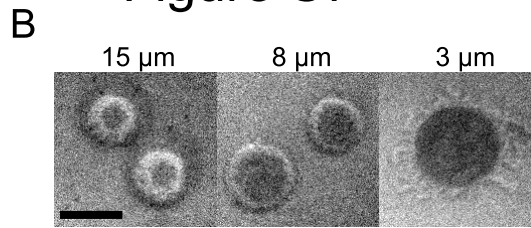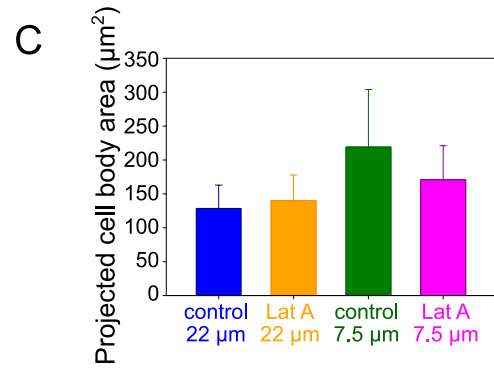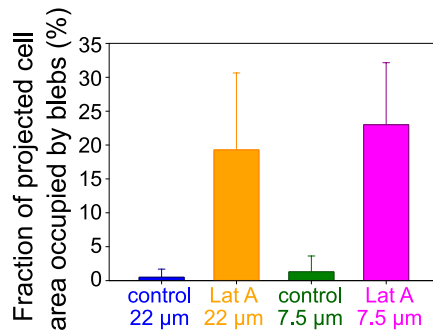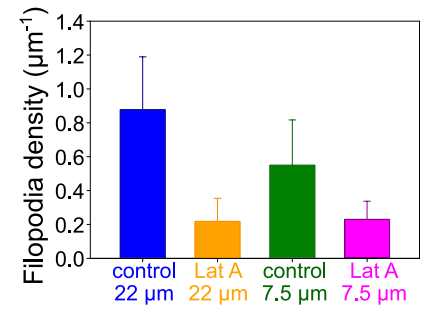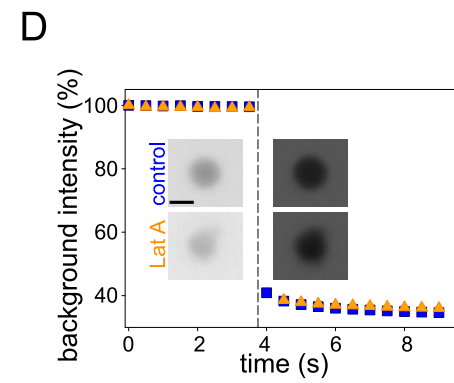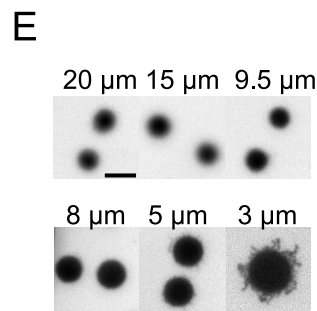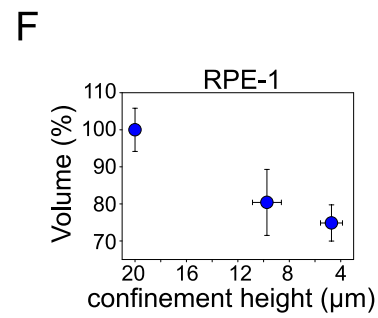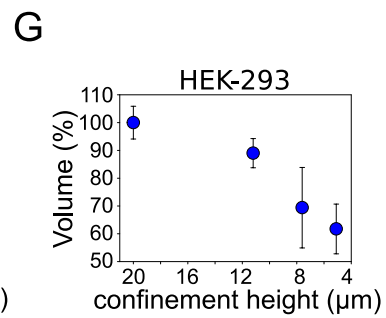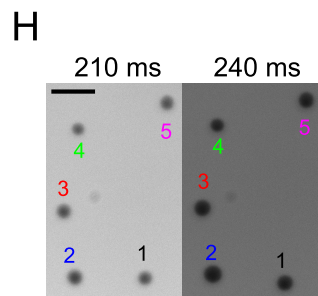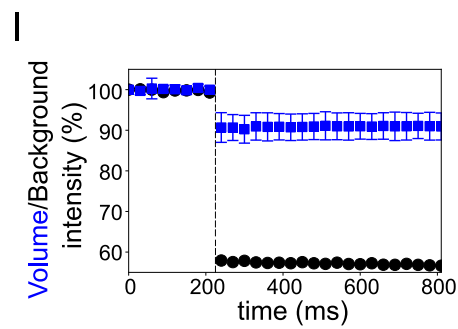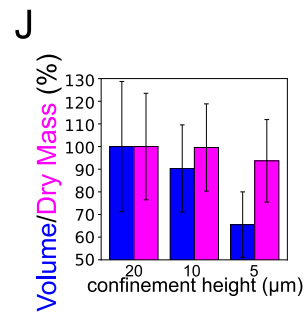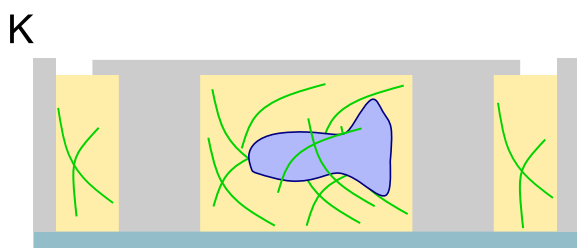

Supplement: supp [file elife_poa_e72381_Figure_7_figure_supplement_1.pdf › elife_poa_e72381_Figure_7_figure_supplement_1.pdf]
